# Supplementary material
Source: PubMed Central journal article supplement (PMC4256481)

**Supplemental Fig. 4. Annotated spectra for single peptide identifications in the in-solution protein IEF workflow in addition to those presented in supplemental Fig. 2.** Where multiple spectra match the peptide sequence, the annotated spectrum corresponding to the best match is reported.

**Protein Group ID:** 4  
**Protein Accession Numbers:** O43264; A1A528; F5H3C1  
**Gene Names:** ZW10  
**Peptide Sequence:** ASFVTEVLAHSGR  
**Total Number of Spectra:** 2  
**Number of Replicates (out of 10):** 2  
**Best Match Score:** 113.35  
**Best Match Posterior Error Probability:** 0.00016785  
**Best Match Spectrum:**

**Scan number** 6789      **Raw file** Prt-OGE-Batch2-Mock-Frac12  
**Method** ITMS; CID      **Genenames** ZW10

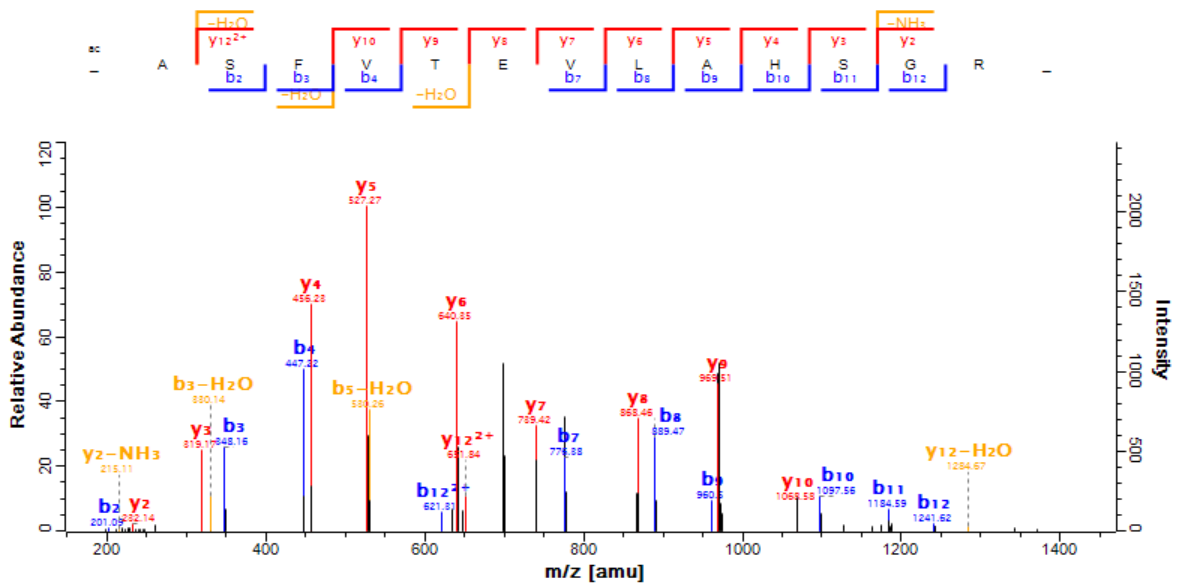

**Protein Group ID: 5**  
**Protein Accession Numbers: A1X283**  
**Gene Names: SH3PXD2B**  
**Peptide Sequence: AKPFLNSLGGQDDTR**  
**Total Number of Spectra: 1**  
**Number of Replicates (out of 10): 1**  
**Best Match Score: 87.447**  
**Best Match Posterior Error Probability: 0.0016358**  
**Best Match Spectrum:**

**Scan number** 1418      **Raw file** Prt-OGE-Batch3--Mock-Frac19  
**Method** ITMS; CID      **Genenames** SH3PXD2B

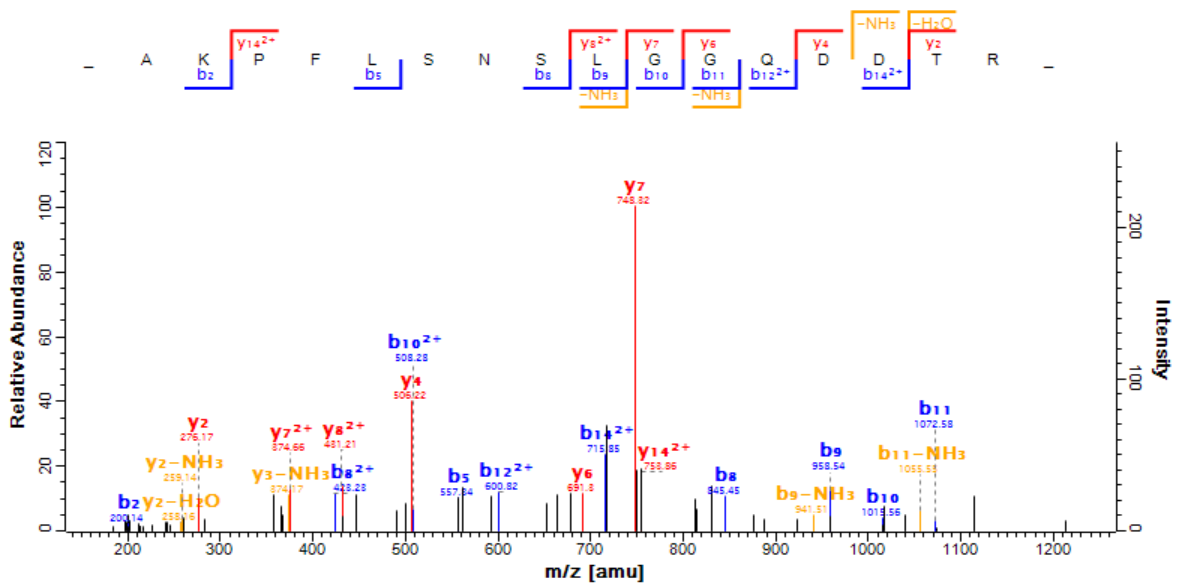

**Protein Group ID:** 18

**Protein Accession Numbers:** Q9Y5U2; Q9Y5U2-2; C9JJV1; C9JHT9; E9PME3; A6NCC9

**Gene Names:** TSSC4

**Peptide Sequence:** VPPVPDYVAHPER

**Total Number of Spectra:** 1

**Number of Replicates (out of 10):** 1

**Best Match Score:** 84.169

**Best Match Posterior Error Probability:** 0.0015703

**Best Match Spectrum:**

|                    |           |                  |                            |
|--------------------|-----------|------------------|----------------------------|
| <b>Scan number</b> | 2817      | <b>Raw file</b>  | Prt-OGE-Batch3--Mock-Frac7 |
| <b>Method</b>      | ITMS; CID | <b>Genenames</b> | TSSC4                      |

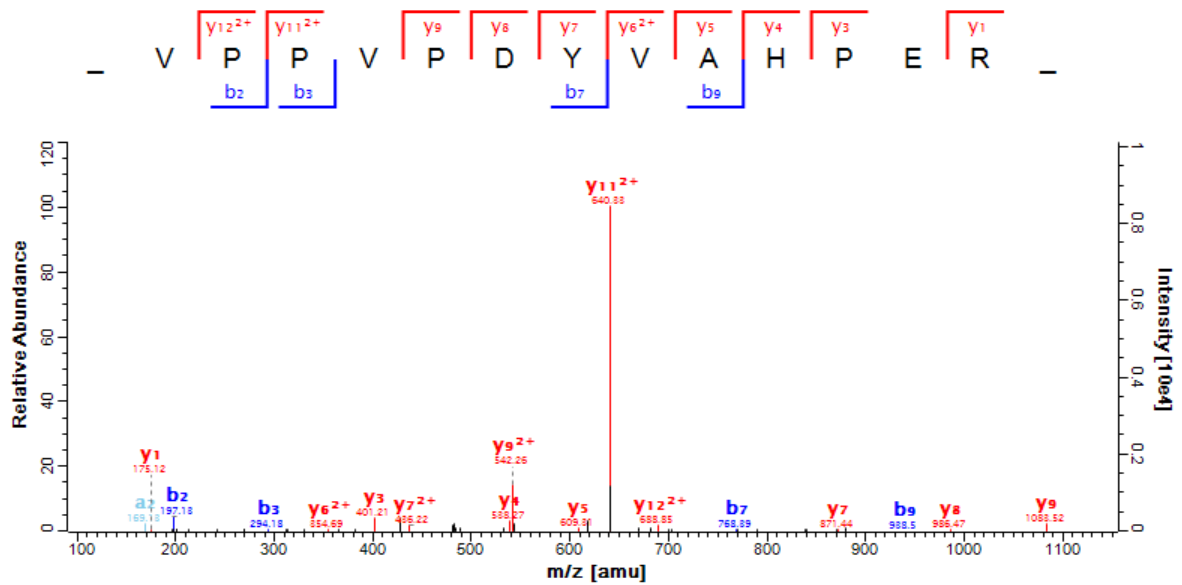



**Protein Group ID:** 23  
**Protein Accession Numbers:** A6NDK8  
**Gene Names:** FAM35B  
**Peptide Sequence:** ISLNAHSSLK  
**Total Number of Spectra:** 1  
**Number of Replicates (out of 10):** 1  
**Best Match Score:** 118.18  
**Best Match Posterior Error Probability:** 0.0016756  
**Best Match Spectrum:**

**Scan number** 2067 **Raw file** Prt-OGE-Batch2-Mock-Frac11  
**Method** ITMS; CID **Genenames** FAM35B

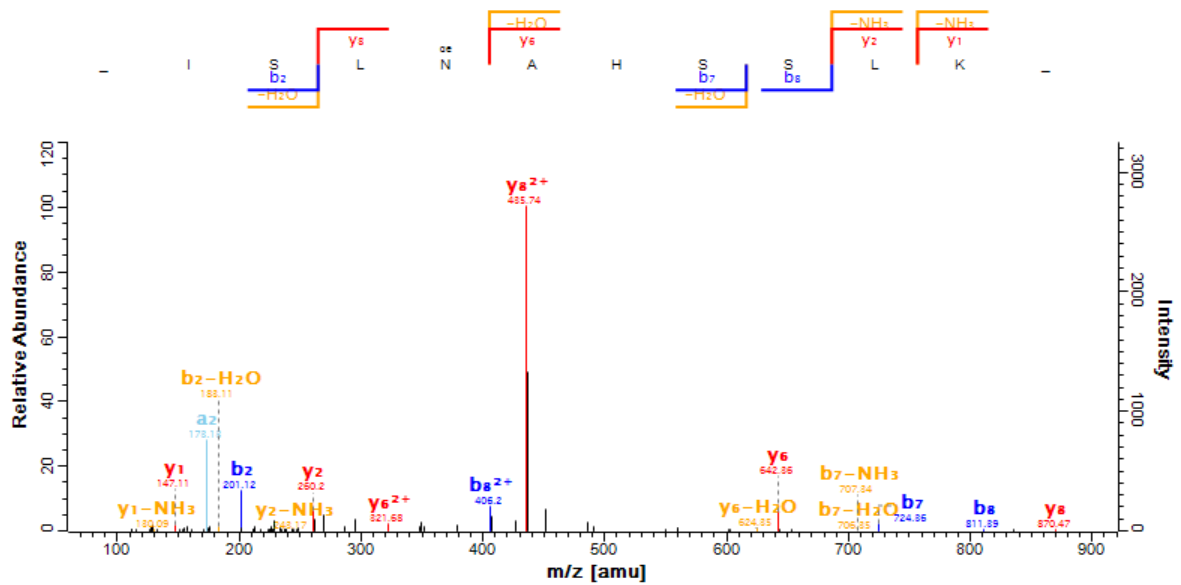

**Protein Group ID:** 26  
**Protein Accession Numbers:** A6NED2; G3V2I3  
**Gene Names:** RCCD1  
**Peptide Sequence:** AGPGPEALLQVWAAESALR  
**Total Number of Spectra:** 7  
**Number of Replicates (out of 10):** 5  
**Best Match Score:** 174.65  
**Best Match Posterior Error Probability:** 2.92E-23  
**Best Match Spectrum:**

**Scan number** 7307      **Raw file** Prt-OGE-Batch2-Mock-Frac7  
**Method** ITMS; CID      **Genenames** RCCD1

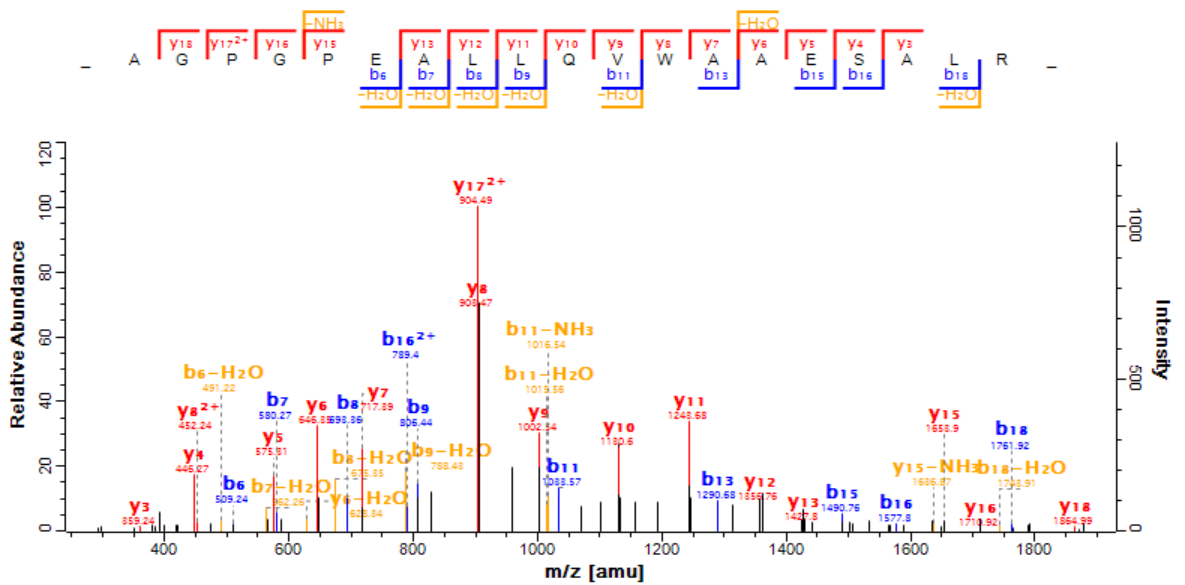

**Protein Group ID:** 31

**Protein Accession Numbers:** P05026; P05026-2; A6NGH2; B7Z9S8

**Gene Names:** ATP1B1

**Peptide Sequence:** SYEAYVLNIVR

**Total Number of Spectra:** 1

**Number of Replicates (out of 10):** 1

**Best Match Score:** 106.62

**Best Match Posterior Error Probability:** 0.00018257

**Best Match Spectrum:**

**Scan number** 5035      **Raw file** 20100927-KD-Batch4-Prt-OGE-WT-Frac12  
**Method** ITMS; CID      **Genenames** ATP1B1

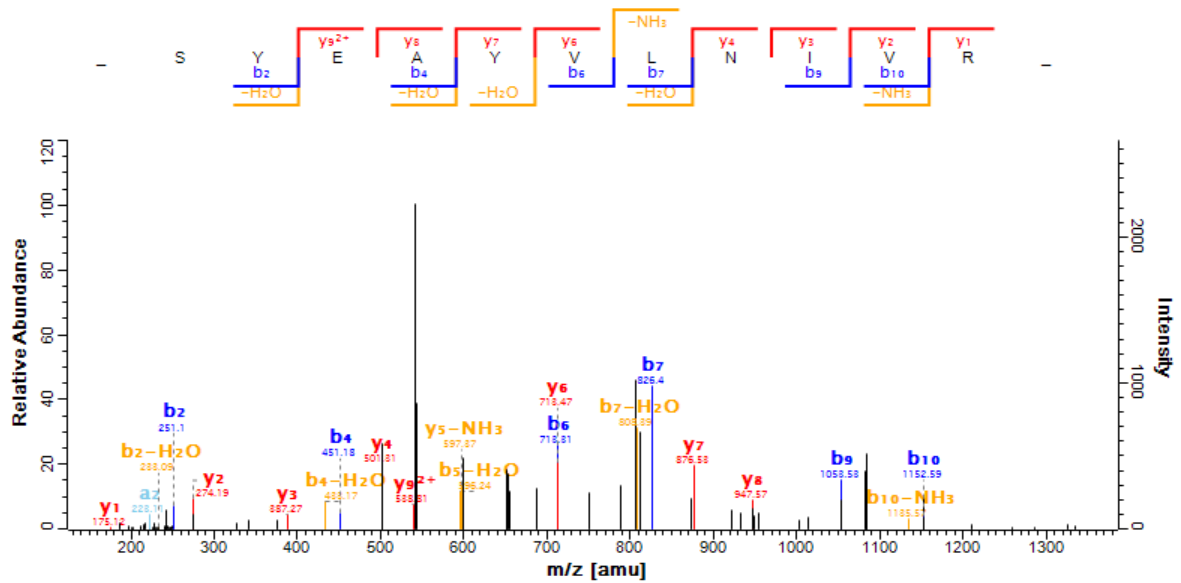

**Protein Group ID:** 32  
**Protein Accession Numbers:** A6NGJ0; P51808  
**Gene Names:** DYNLT3  
**Peptide Sequence:** HCDEVGFNAEEAHNIVK  
**Total Number of Spectra:** 2  
**Number of Replicates (out of 10):** 2  
**Best Match Score:** 131.72  
**Best Match Posterior Error Probability:** 2.29E-05  
**Best Match Spectrum:**

**Scan number** 2591      **Raw file** 20100927-KD-Batch4-Prt-OGE-WT-Frac7  
**Method** ITMS; CID      **Genenames** DYNLT3

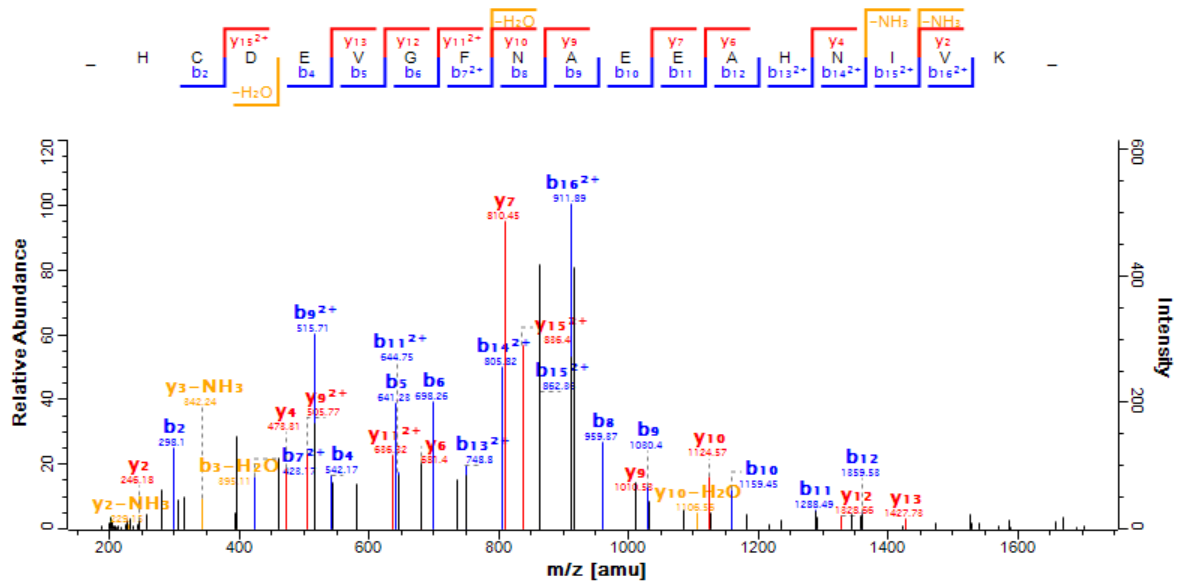

**Protein Group ID:** 34

**Protein Accession Numbers:** O95825; A6NMA8; A6NHJ8; A6NND8; H7C3I5; B3KQ77; C9JZK8; F8WF64; C9JAL0; C9K0F7; H7C338; H7C3S0

**Gene Names:** CRYZL1

**Peptide Sequence:** SVLIMDGASAFGTIAIQLAHR

**Total Number of Spectra:** 2

**Number of Replicates (out of 10):** 2

**Best Match Score:** 97.32

**Best Match Posterior Error Probability:** 8.89E-06

**Best Match Spectrum:**

|                    |           |                  |                                        |
|--------------------|-----------|------------------|----------------------------------------|
| <b>Scan number</b> | 6469      | <b>Raw file</b>  | 20100917-KD-Batch5-Prt-OGE-Mock-Frac10 |
| <b>Method</b>      | ITMS; CID | <b>Genenames</b> | CRYZL1                                 |

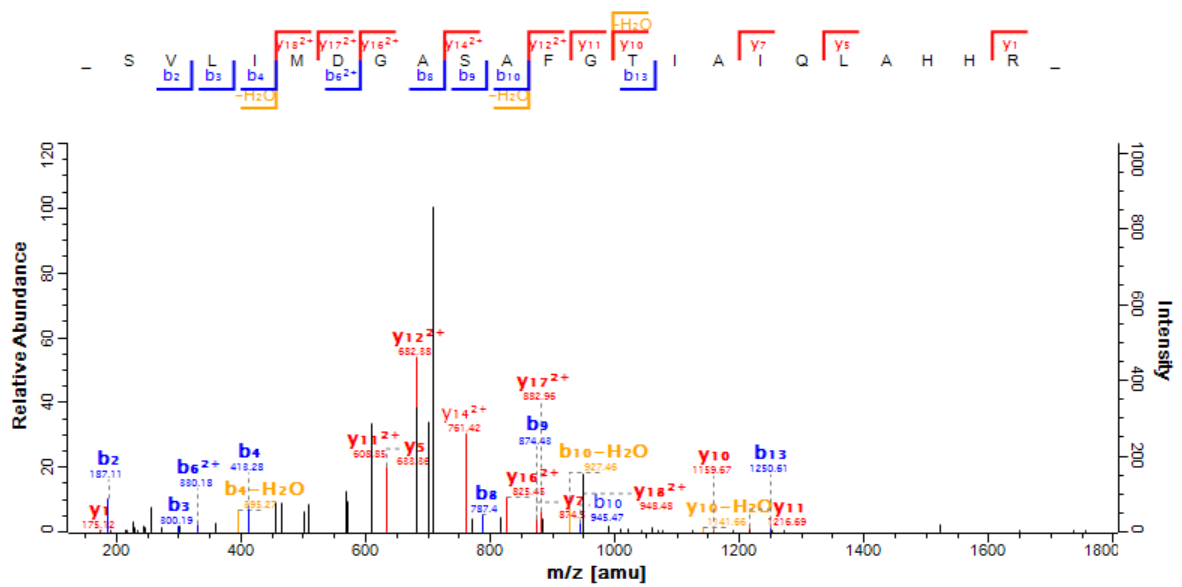

**Protein Group ID:** 35  
**Protein Accession Numbers:** A6NHL2; A6NHL2-2  
**Gene Names:** TUBAL3  
**Peptide Sequence:** SFGGGTGS GFTS  
**Total Number of Spectra:** 2  
**Number of Replicates (out of 10):** 2  
**Best Match Score:** 78.326  
**Best Match Posterior Error Probability:** 0.0013093  
**Best Match Spectrum:**

**Scan number** 5282      **Raw file** 20100914-KD-Batch4-Prt-OGE-Mock-Frac11  
**Method** ITMS; CID      **Genenames** TUBAL3

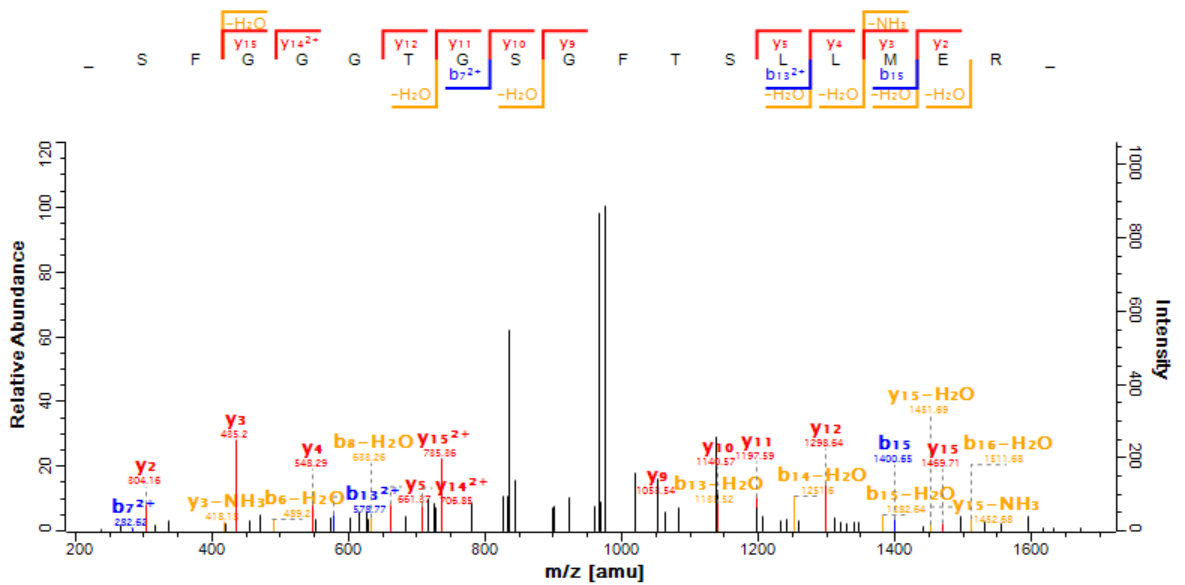

**Protein Group ID:** 41

**Protein Accession Numbers:** A6NIZ1; P61224; P62834; P61224-3; P61224-4; P61224-2; F5GZG1; B7ZB78; F5H823

**Gene Names:** RAP1B;RAP1A

**Peptide Sequence:** INVNEIFYDLVR

**Total Number of Spectra:** 52

**Number of Replicates (out of 10):** 10

**Best Match Score:** 213.82

**Best Match Posterior Error Probability:** 8.36E-32

**Best Match Spectrum:**

|                    |           |                  |                                      |
|--------------------|-----------|------------------|--------------------------------------|
| <b>Scan number</b> | 7087      | <b>Raw file</b>  | 20100927-KD-Batch4-Prt-OGE-WT-Frac14 |
| <b>Method</b>      | ITMS; CID | <b>Genenames</b> | RAP1B;RAP1A                          |

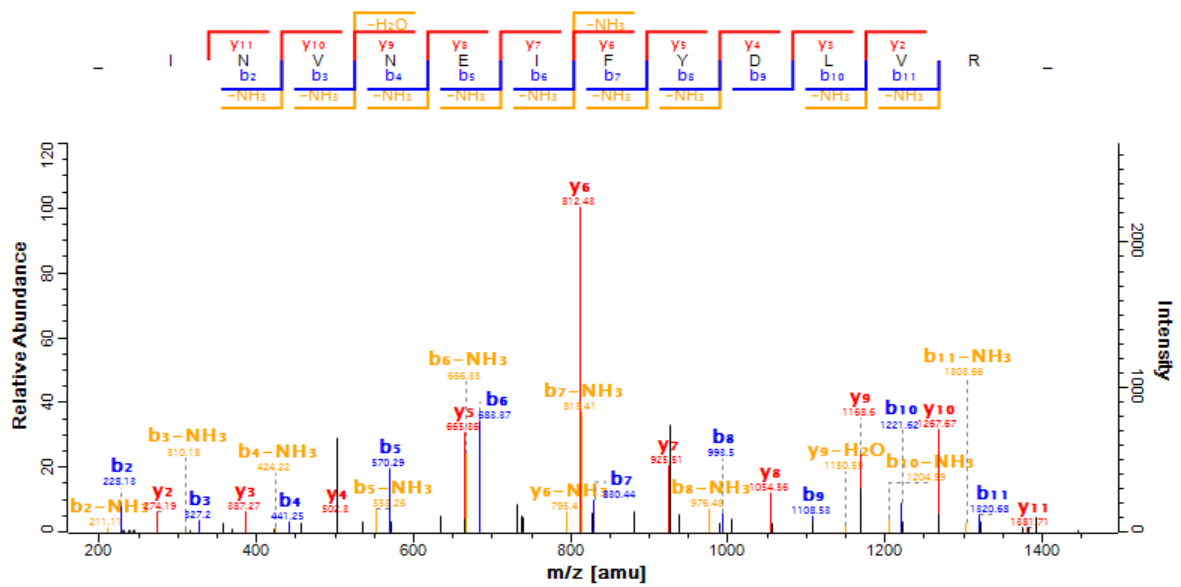

**Protein Group ID:** 42

**Protein Accession Numbers:** P22310; P35503; P35504; P22309; P19224; O60656; Q9HAW7; Q9HAW8; Q9HAW9; B8K288; A6NJC3; Q7Z6H8; A6NKK6; B5MCT4

**Gene Names:**

UGT1A4;UGT1A3;UGT1A5;UGT1A1;UGT1A6;UGT1A9;UGT1A7;UGT1A10;UGT1A8;UGT1A4S

**Peptide Sequence:** GAGVTLNVLEMTS

**Total Number of Spectra:** 1

**Number of Replicates (out of 10):** 1

**Best Match Score:** 67.579

**Best Match Posterior Error Probability:** 0.0016236

**Best Match Spectrum:**

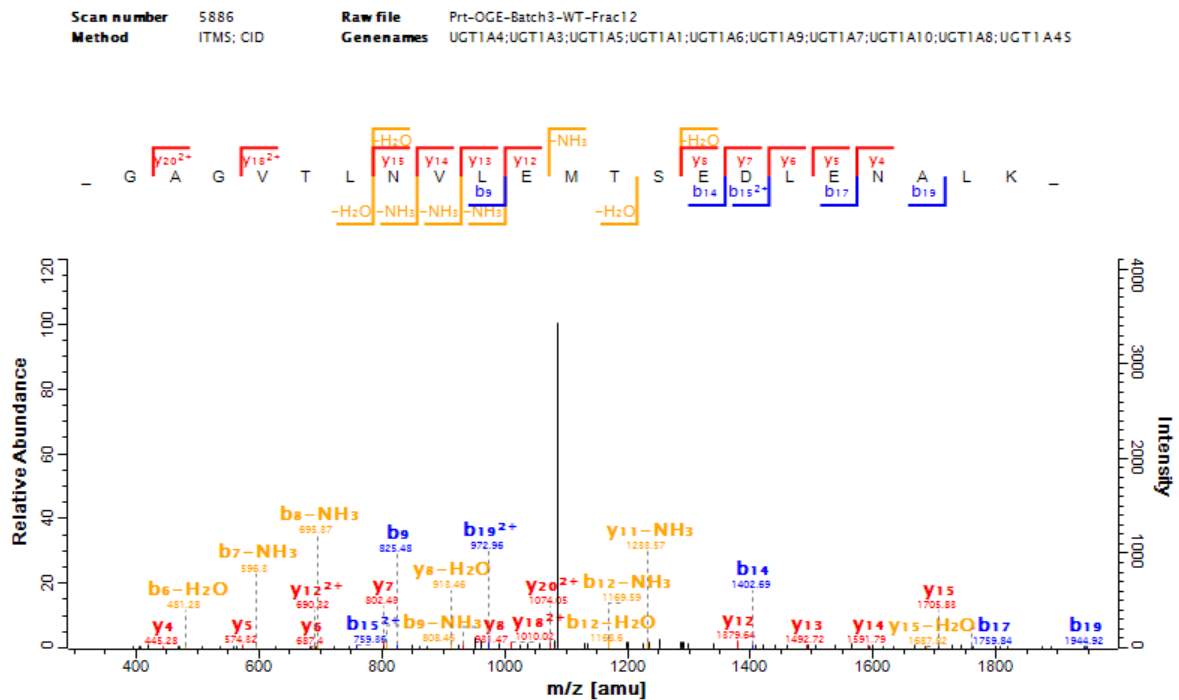



**Protein Group ID:** 43  
**Protein Accession Numbers:** Q96BP2; A6NJX6  
**Gene Names:** CHCHD1  
**Peptide Sequence:** EIQGFLDCAAR  
**Total Number of Spectra:** 2  
**Number of Replicates (out of 10):** 2  
**Best Match Score:** 134.13  
**Best Match Posterior Error Probability:** 3.20E-05  
**Best Match Spectrum:**

**Scan number** 2574      **Raw file** 20100914-KD-Batch4-Prt-OGE-Mock-Frac21  
**Method** ITMS; CID      **Genenames** CHCHD1

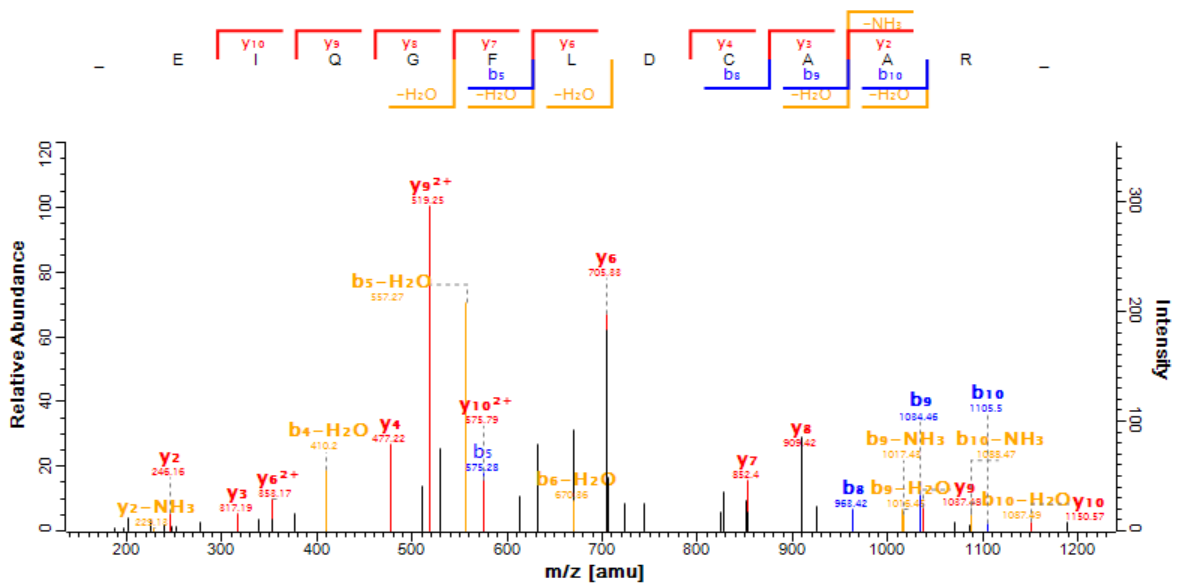

**Protein Group ID:** 45  
**Protein Accession Numbers:** A6NKZ8  
**Gene Names:**  
**Peptide Sequence:** TAICDIPPR  
**Total Number of Spectra:** 1  
**Number of Replicates (out of 10):** 1  
**Best Match Score:** 80.239  
**Best Match Posterior Error Probability:** 0.0035877  
**Best Match Spectrum:**

**Scan number** 1451      **Raw file** Prt-OGE-Batch3-WT-Frac5  
**Method** ITMS; CID      **Pepti...** 80.24

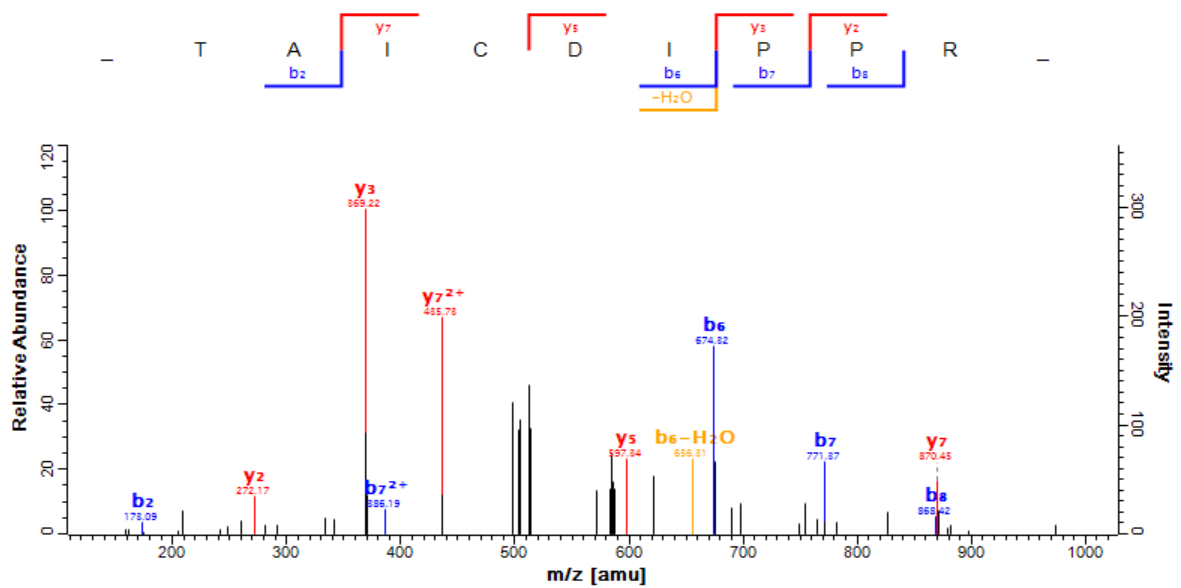

**Protein Group ID:** 46

**Protein Accession Numbers:** Q4V339; Q5JTY5; Q5RIA9; Q8IUF1; Q9BRT8; B4DNG9; F5H3X4; F8WEG4; Q4V338; Q5JTY2; Q5RIB3; Q9BRT8-2; A6NM15; H0Y857; E9PFE9

**Gene Names:** CBWD6;CBWD3;CBWD5;CBWD2;CBWD1;CBWD7

**Peptide Sequence:** VDLSNVLDLHAFDSLSGISLQK

**Total Number of Spectra:** 5

**Number of Replicates (out of 10):** 5

**Best Match Score:** 141.6

**Best Match Posterior Error Probability:** 1.47E-13

**Best Match Spectrum:**

Scan number 6749 Raw file Prt-OGE-Batch3-Mock-Frac5  
Method ITMS: CID Genenames CBWD6;CBWD3;CBWD5;CBWD2;CBWD1;CBWD7

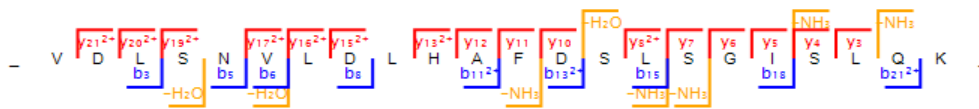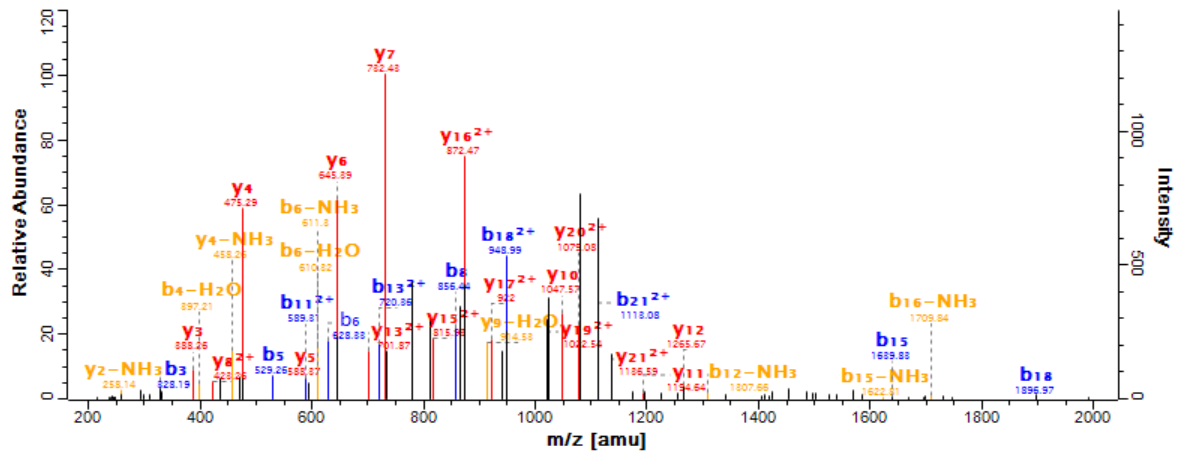

**Protein Group ID:** 58

**Protein Accession Numbers:** I3L448; Q5TC12; A8MRA7; I3L1W9; B7Z7I6; H0YD21; B7Z7D6; H0YEW4

**Gene Names:** ATPAF1

**Peptide Sequence:** YMSVIAELQSGALGK

**Total Number of Spectra:** 10

**Number of Replicates (out of 10):** 6

**Best Match Score:** 206.62

**Best Match Posterior Error Probability:** 7.02E-54

**Best Match Spectrum:**

|                    |           |                  |                           |
|--------------------|-----------|------------------|---------------------------|
| <b>Scan number</b> | 5695      | <b>Raw file</b>  | Prt-OGE-Batch2-WT-Frac1.2 |
| <b>Method</b>      | ITMS: CID | <b>Genenames</b> | ATPAF1                    |

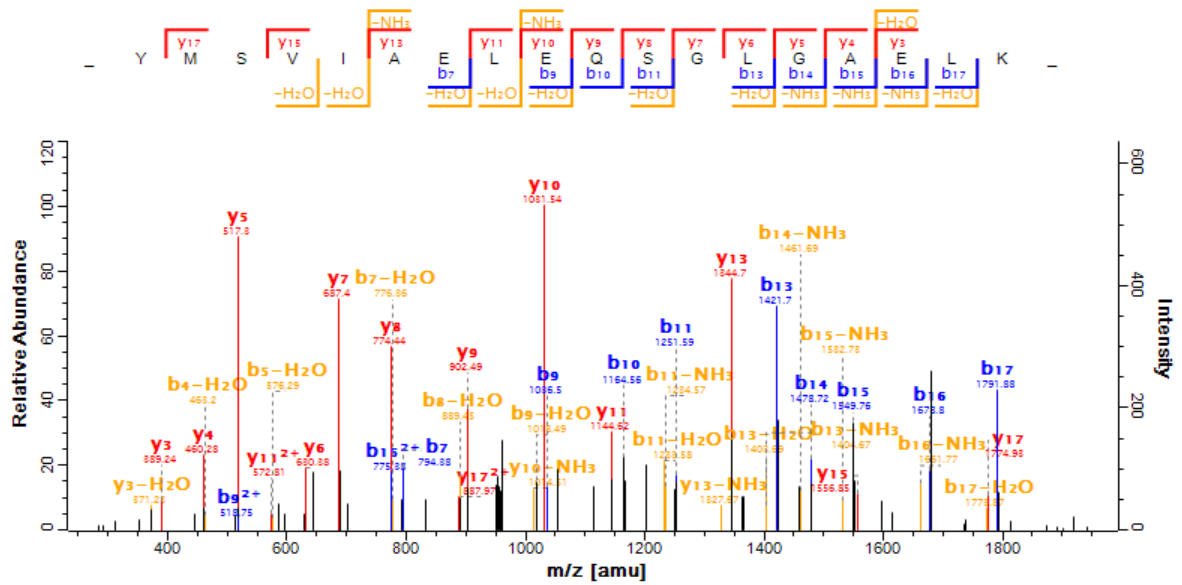

**Protein Group ID:** 78  
**Protein Accession Numbers:** A9J4F5; O00488  
**Gene Names:** ZNF593  
**Peptide Sequence:** P Q P D P N A E F D P D L P G L H R  
**Total Number of Spectra:** 1  
**Number of Replicates (out of 10):** 1  
**Best Match Score:** 78.661  
**Best Match Posterior Error Probability:** 0.0011133  
**Best Match Spectrum:**

**Scan number** 3893      **Raw file** 20100930-KD-Batch5-Prt-OGE-WT-Frac19  
**Method** ITMS; CID      **Genenames** ZNF593

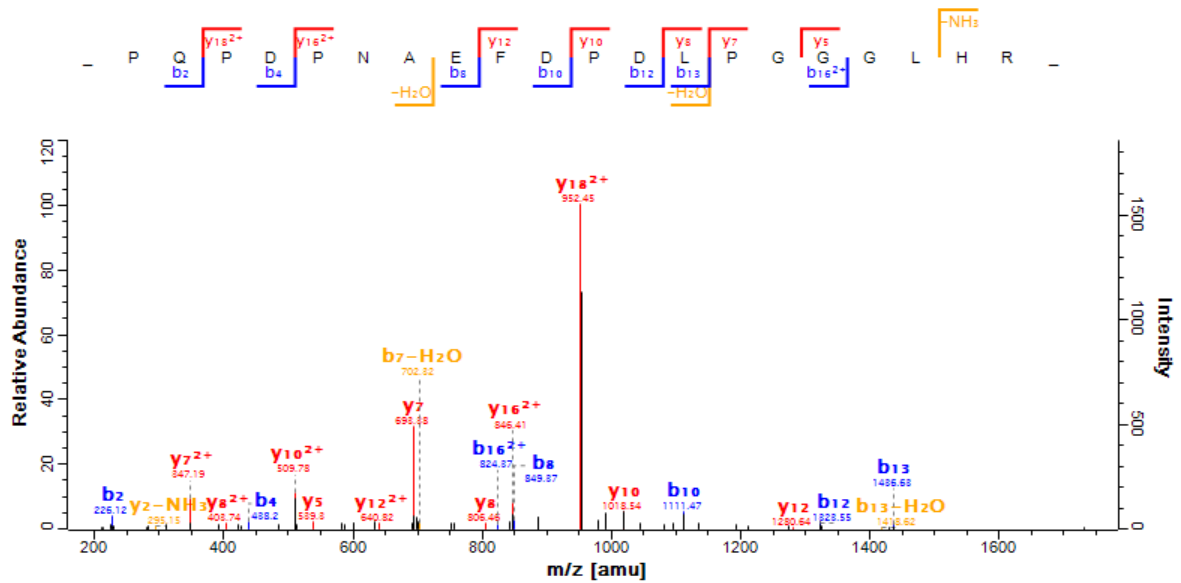

**Protein Group ID:** 79

**Protein Accession Numbers:** Q5R3I4; E7ES35; A9UJP8; H7C2L7

**Gene Names:** TTC38

**Peptide Sequence:** LDKELDLAVK

**Total Number of Spectra:** 4

**Number of Replicates (out of 10):** 3

**Best Match Score:** 103.26

**Best Match Posterior Error Probability:** 0.001624

**Best Match Spectrum:**

**Scan number** 2743      **Raw file** 20100927-KD-Batch4-Prt-OGE-WT-Frac11  
**Method** ITMS; CID      **Genenames** TTC38

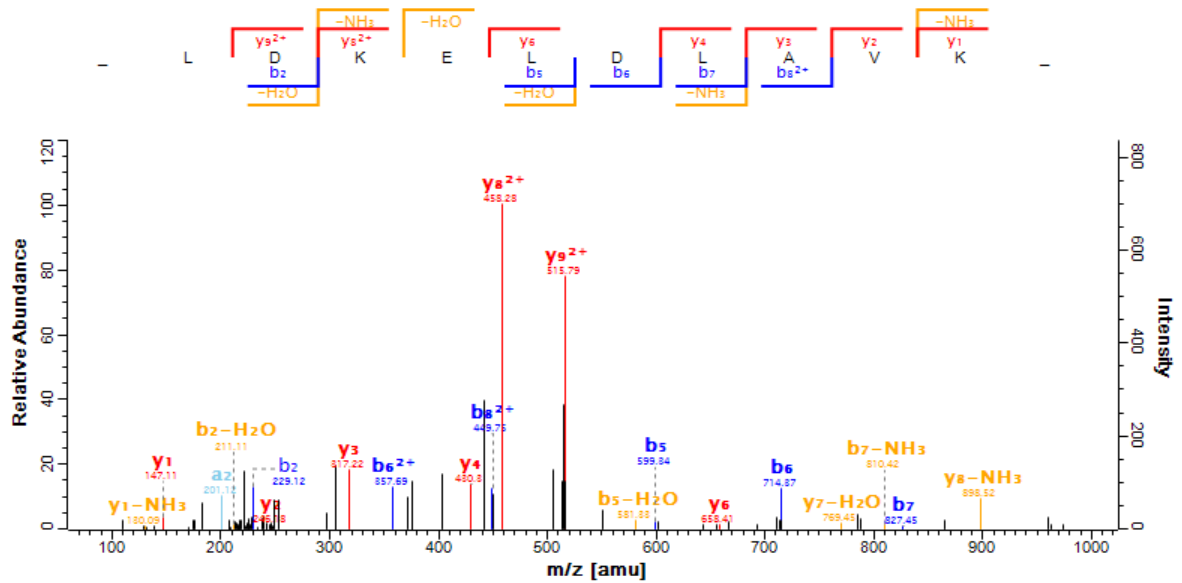

**Protein Group ID:** 82  
**Protein Accession Numbers:** O00178; B0QY59  
**Gene Names:** GTPBP1  
**Peptide Sequence:** QTATILSMDKDCLR  
**Total Number of Spectra:** 1  
**Number of Replicates (out of 10):** 1  
**Best Match Score:** 127.71  
**Best Match Posterior Error Probability:** 0.002904  
**Best Match Spectrum:**

**Scan number** 6669      **Raw file** 20100930-KD-Batch5-Prt-OGE-WT-Frac12  
**Method** ITMS; CID      **Genenames** GTPBP1

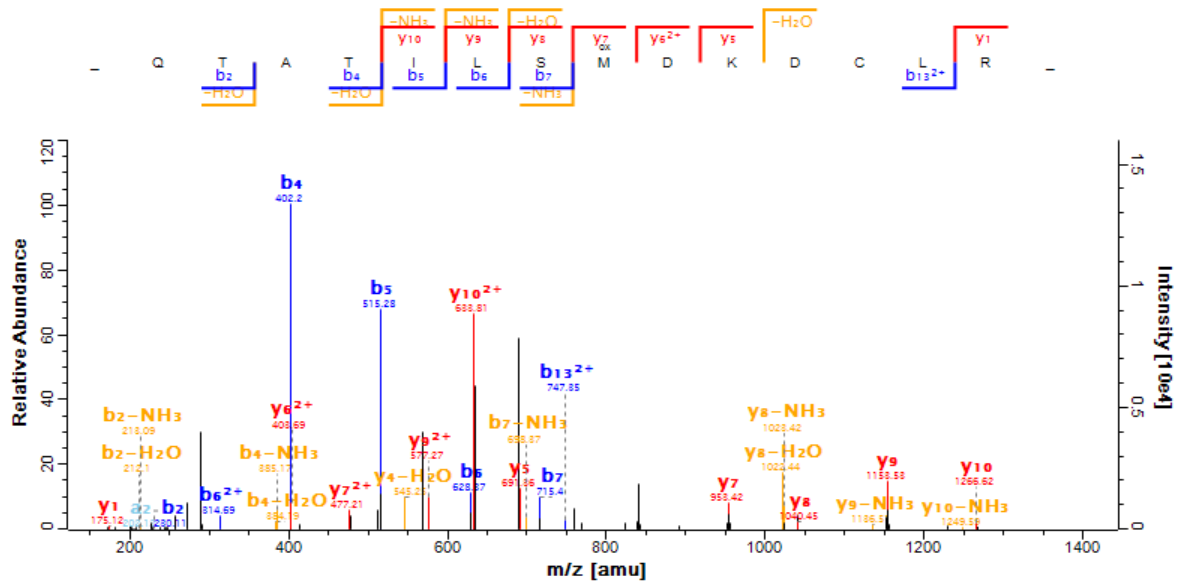

**Protein Group ID:** 84

**Protein Accession Numbers:** P02144; B0QYF8; F2Z2F1; Q8WVH6; B0QYF7

**Gene Names:** MB

**Peptide Sequence:** HGATVLTALGGILK

**Total Number of Spectra:** 3

**Number of Replicates (out of 10):** 3

**Best Match Score:** 140.14

**Best Match Posterior Error Probability:** 2.81E-06

**Best Match Spectrum:**

|                    |           |                  |                            |
|--------------------|-----------|------------------|----------------------------|
| <b>Scan number</b> | 4527      | <b>Raw file</b>  | Prt-OGE-Batch3-Mock-Frac18 |
| <b>Method</b>      | ITMS; CID | <b>Genenames</b> | MB                         |

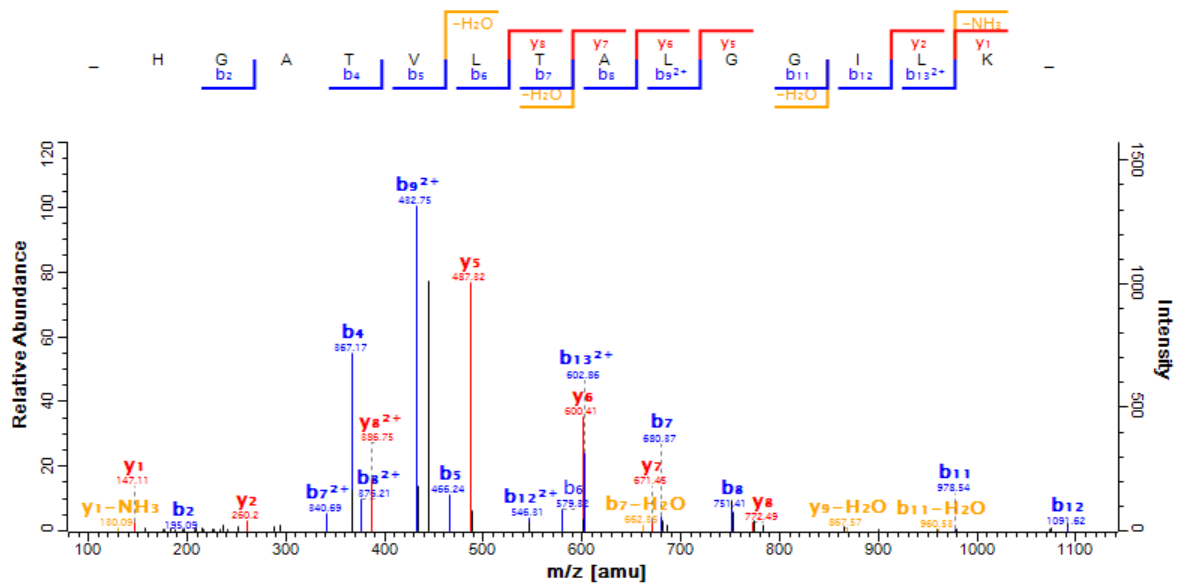



**Protein Group ID:** 87

**Protein Accession Numbers:** Q5SSJ5; Q5SSJ5-2; Q5SSJ5-3; B0QZK4

**Gene Names:** HP1BP3

**Peptide Sequence:** SGEKPLLGGSLMEYAILSALISAIAMNEPK

**Total Number of Spectra:** 10

**Number of Replicates (out of 10):** 5

**Best Match Score:** 79.69

**Best Match Posterior Error Probability:** 1.23E-05

**Best Match Spectrum:**

**Scan number** 8534      **Raw file** 20100930-KD-Batch5-Prt-OGE-WT-Frac15  
**Method** ITMS; CID      **Genenames** HP1BP3

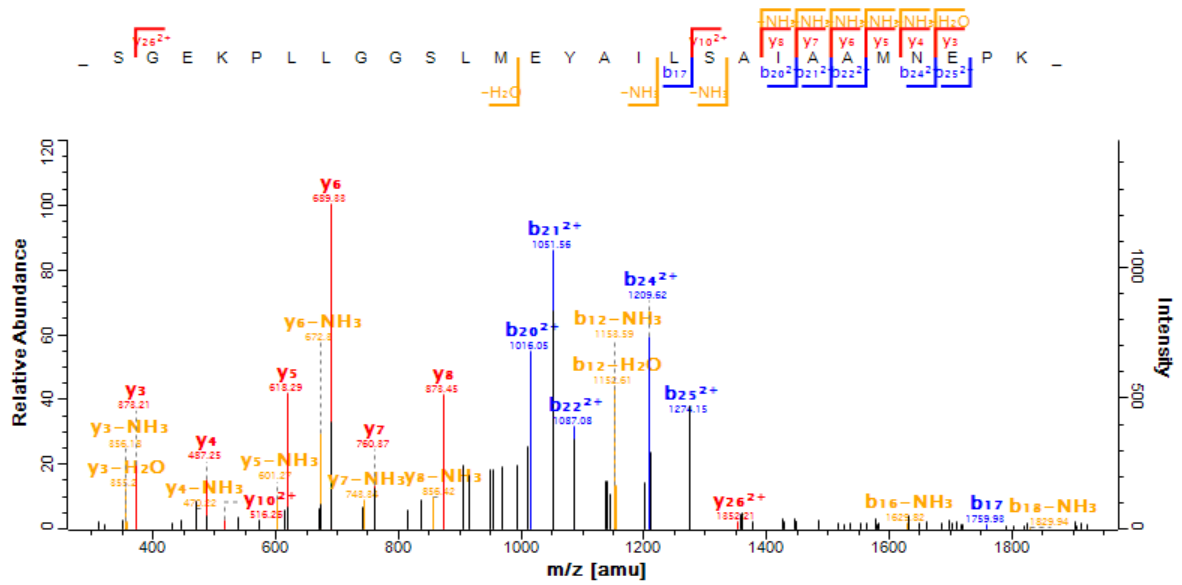

**Protein Group ID:** 93  
**Protein Accession Numbers:** B0YIW2; P02656  
**Gene Names:** APOC3  
**Peptide Sequence:** DALSSVQESQVAQQAR  
**Total Number of Spectra:** 11  
**Number of Replicates (out of 10):** 5  
**Best Match Score:** 136.26  
**Best Match Posterior Error Probability:** 1.09E-05  
**Best Match Spectrum:**

**Scan number** 2364      **Raw file** 20100930-KD-Batch5-Prt-OGE-WT-Frac2  
**Method** ITMS; CID      **Genenames** APOC3

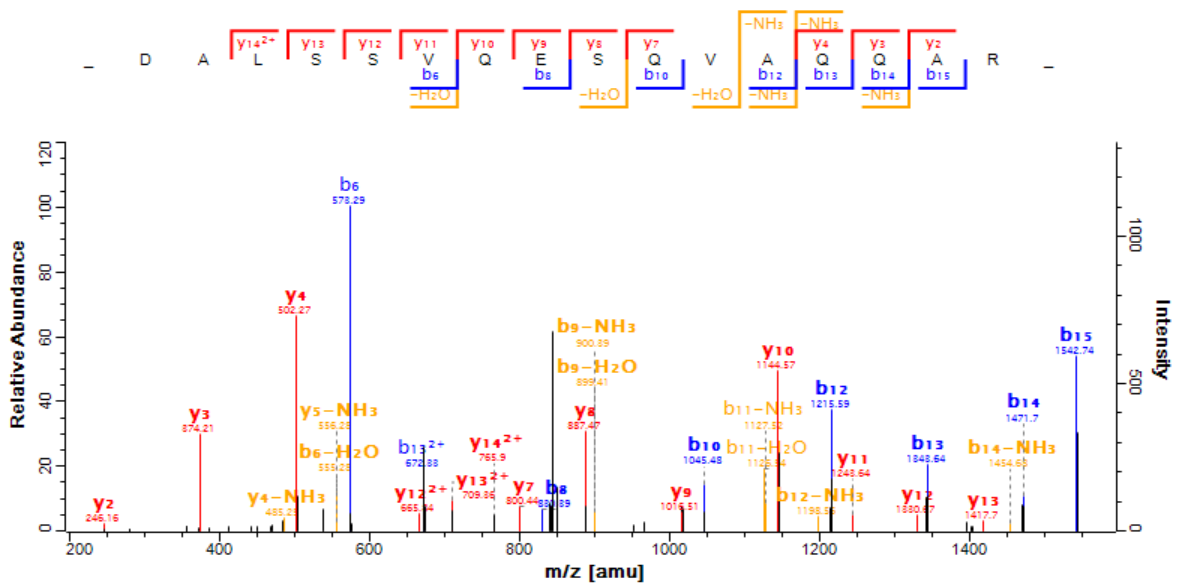

**Protein Group ID:** 98

**Protein Accession Numbers:** REV\_\_P82094-2; REV\_\_P82094; Q9UIA0; B1AHH6; B1AHH5; B1AHH4

**Gene Names:** CYTH4

**Peptide Sequence:** QLLEDIQK

**Total Number of Spectra:** 2

**Number of Replicates (out of 10):** 2

**Best Match Score:** 114.89

**Best Match Posterior Error Probability:** 0.0015884

**Best Match Spectrum:**

|                    |           |                  |                |
|--------------------|-----------|------------------|----------------|
| <b>Scan number</b> | 3257      | <b>Raw file</b>  | OGE-Mock-Frac8 |
| <b>Method</b>      | ITMS; CID | <b>Genenames</b> | CYTH4          |

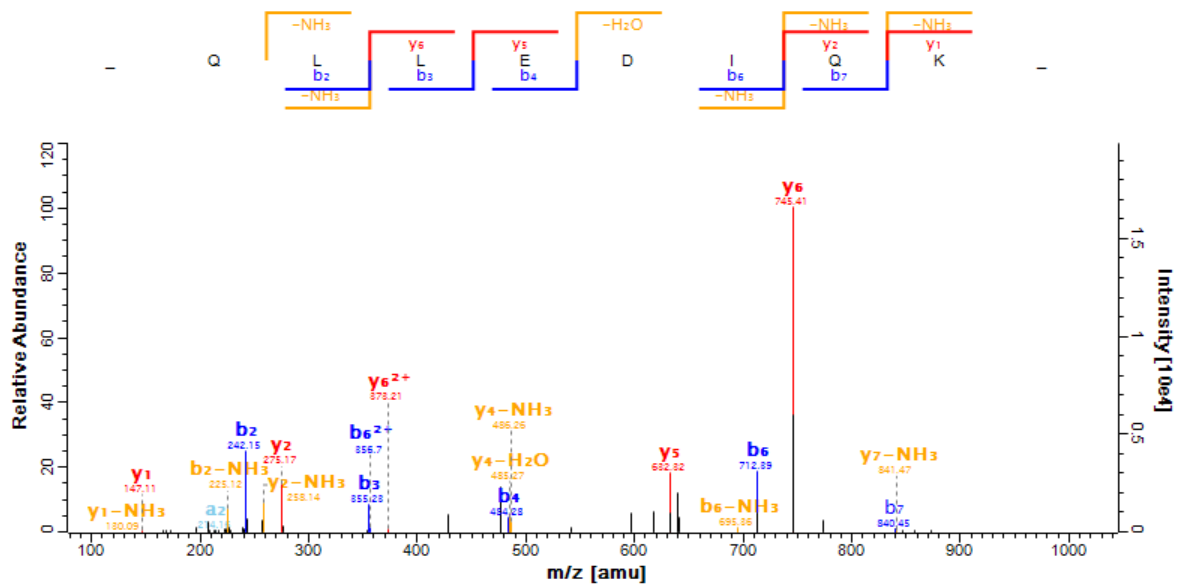

**Protein Group ID:** 101

**Protein Accession Numbers:** Q5TZA2; B1AKD8; Q5TZA2-2

**Gene Names:** CROCC

**Peptide Sequence:** LALLEEAR

**Total Number of Spectra:** 50

**Number of Replicates (out of 10):** 10

**Best Match Score:** 114.89

**Best Match Posterior Error Probability:** 0.0015884

**Best Match Spectrum:**

|                    |           |                  |                            |
|--------------------|-----------|------------------|----------------------------|
| <b>Scan number</b> | 3524      | <b>Raw file</b>  | Prt-OGE-Batch2-Mock-Frac20 |
| <b>Method</b>      | ITMS; CID | <b>Genenames</b> | CROCC                      |

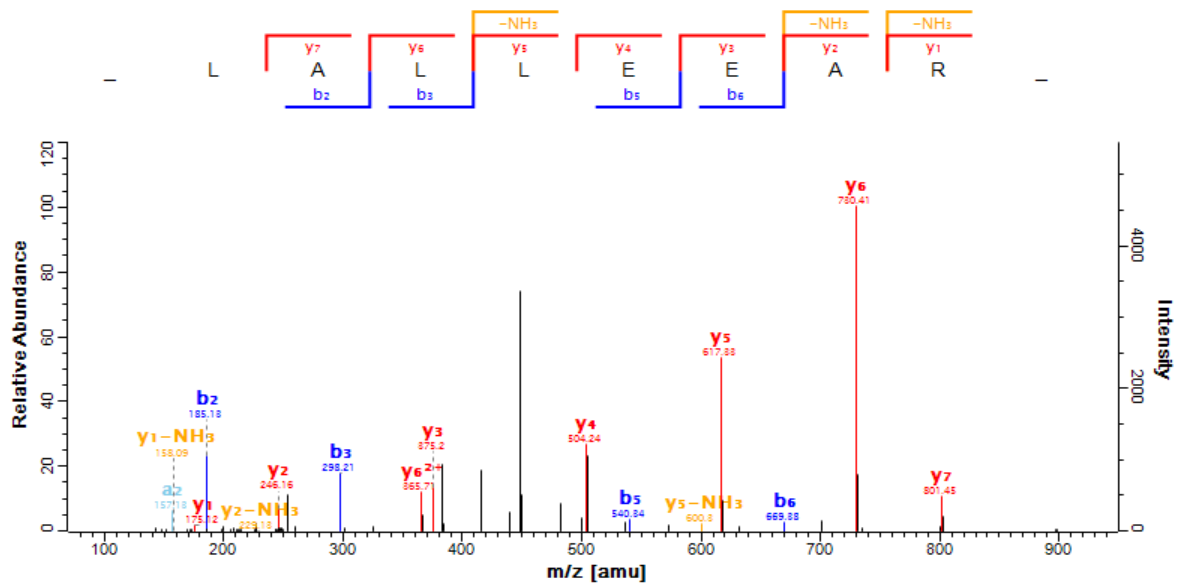

**Protein Group ID:** 102

**Protein Accession Numbers:** J3KPA3; Q96SU4-6; B1AKJ6; Q96SU4; Q96SU4-2; Q96SU4-7; E9PJW9; Q96SU4-3; H0YE19; E9PK98

**Gene Names:** OSBPL9

**Peptide Sequence:** LTEADAYLQILIEQLK

**Total Number of Spectra:** 4

**Number of Replicates (out of 10):** 4

**Best Match Score:** 171.26

**Best Match Posterior Error Probability:** 1.44E-15

**Best Match Spectrum:**

|                    |           |                  |                                      |
|--------------------|-----------|------------------|--------------------------------------|
| <b>Scan number</b> | 7873      | <b>Raw file</b>  | 20100930-KD-Batch5-Prt-OGE-WT-Frac13 |
| <b>Method</b>      | ITMS; CID | <b>Genenames</b> | OSBPL9                               |

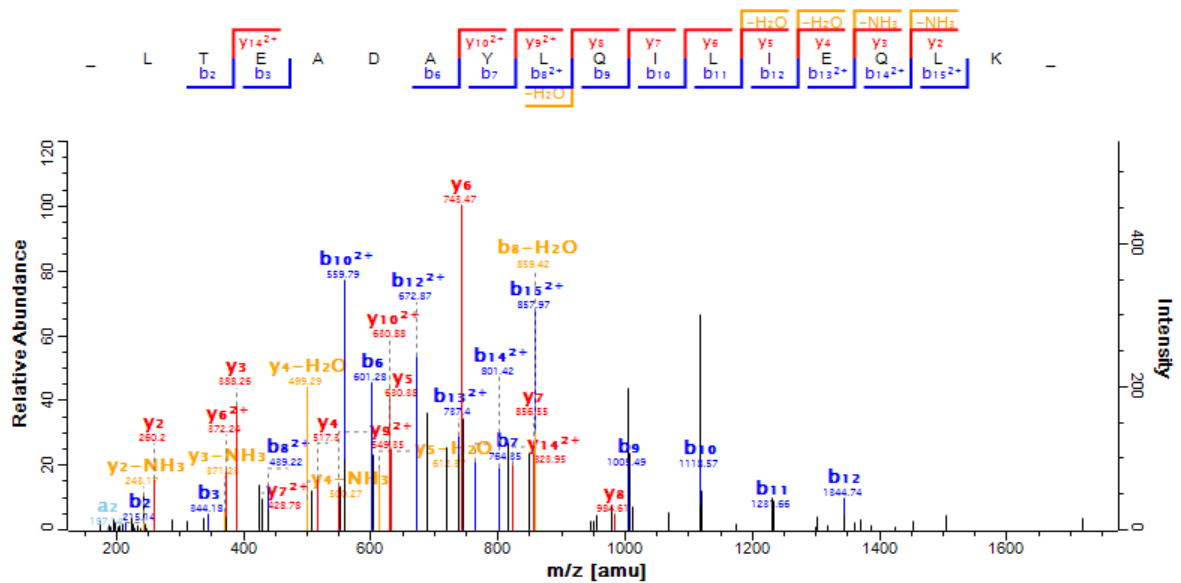

**Protein Group ID:** 103  
**Protein Accession Numbers:** P50993; B1AKY9  
**Gene Names:** ATP1A2  
**Peptide Sequence:** IATLASGLEVGR  
**Total Number of Spectra:** 1  
**Number of Replicates (out of 10):** 1  
**Best Match Score:** 84.687  
**Best Match Posterior Error Probability:** 0.0013281  
**Best Match Spectrum:**

**Scan number** 3343      **Raw file** OGE-WT-Frac3  
**Method** ITMS; CID      **Genenames** ATP1A2

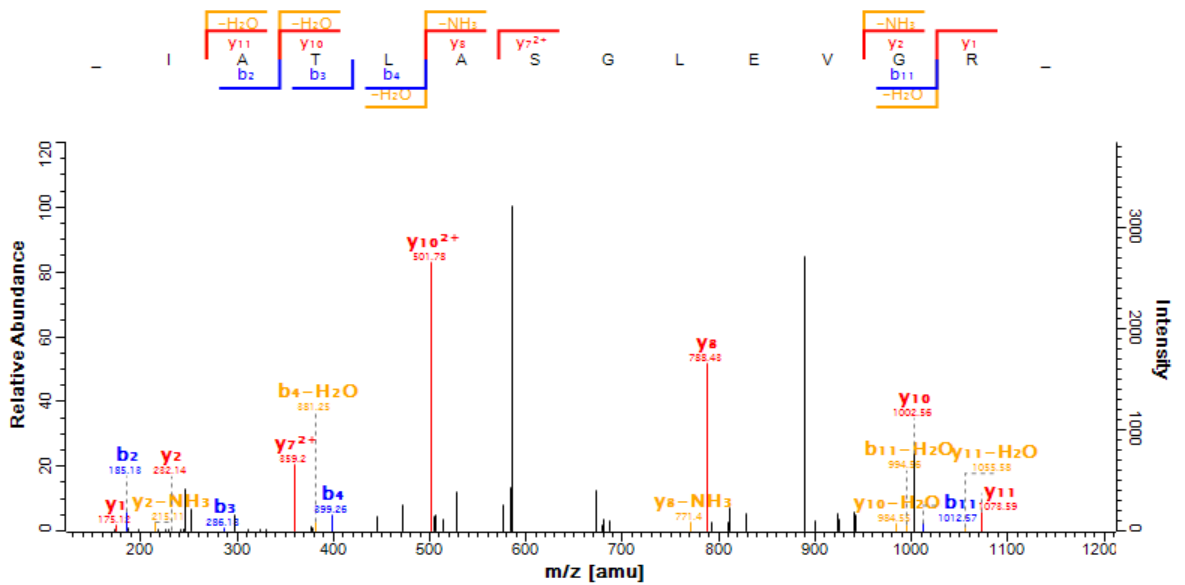

**Protein Group ID:** 105

**Protein Accession Numbers:** Q14155-5; B7Z6G2; B1ALK7; Q14155-1

**Gene Names:** ARHGEF7

**Peptide Sequence:** SLVDTVYALKDEVQELR

**Total Number of Spectra:** 4

**Number of Replicates (out of 10):** 3

**Best Match Score:** 109.07

**Best Match Posterior Error Probability:** 0.00052743

**Best Match Spectrum:**

|                    |           |                  |                                        |
|--------------------|-----------|------------------|----------------------------------------|
| <b>Scan number</b> | 6324      | <b>Raw file</b>  | 20100914-KD-Batch4-Prt-OGE-Mock-Frac14 |
| <b>Method</b>      | ITMS; CID | <b>Genenames</b> | ARHGEF7                                |

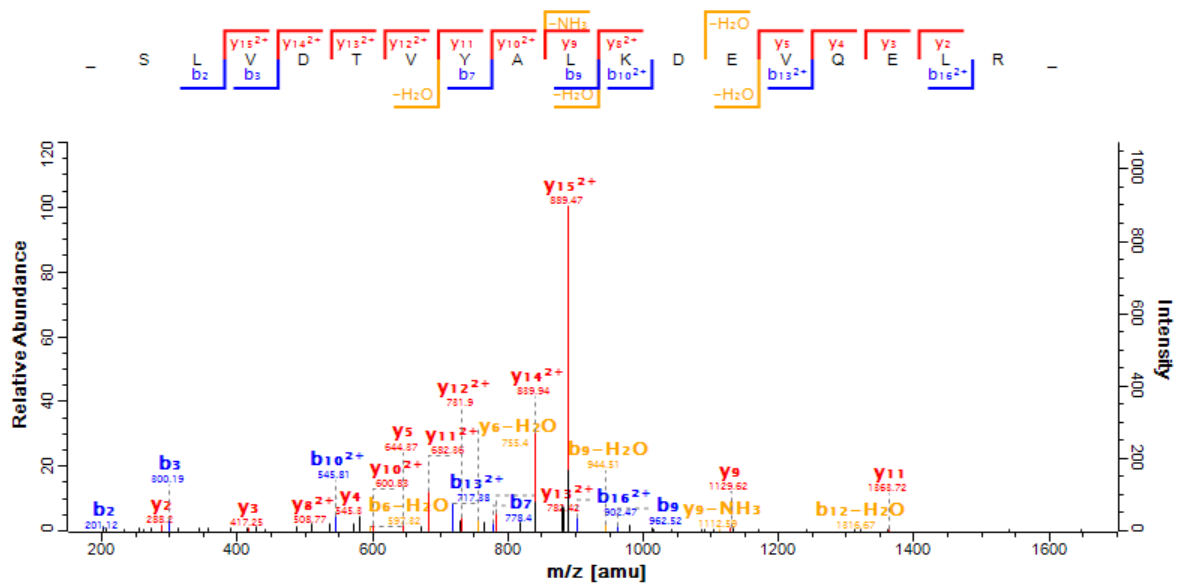

**Protein Group ID:** 106

**Protein Accession Numbers:** P29992; P50148; O95837; B1AM21

**Gene Names:** GNA11;GNAQ;GNA14

**Peptide Sequence:** LVYQNIFTAMQAMIR

**Total Number of Spectra:** 3

**Number of Replicates (out of 10):** 3

**Best Match Score:** 101.43

**Best Match Posterior Error Probability:** 0.00011006

**Best Match Spectrum:**

**Scan number** 7541      **Raw file** 20100917-KD-Batch5-Prt-OGE-Mock-Frac10  
**Method** ITMS; CID      **Genenames** GNA11;GNAQ;GNA14

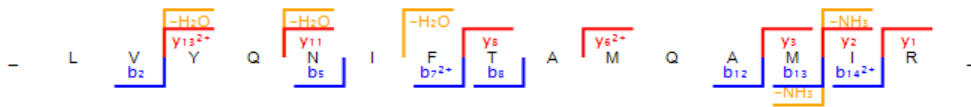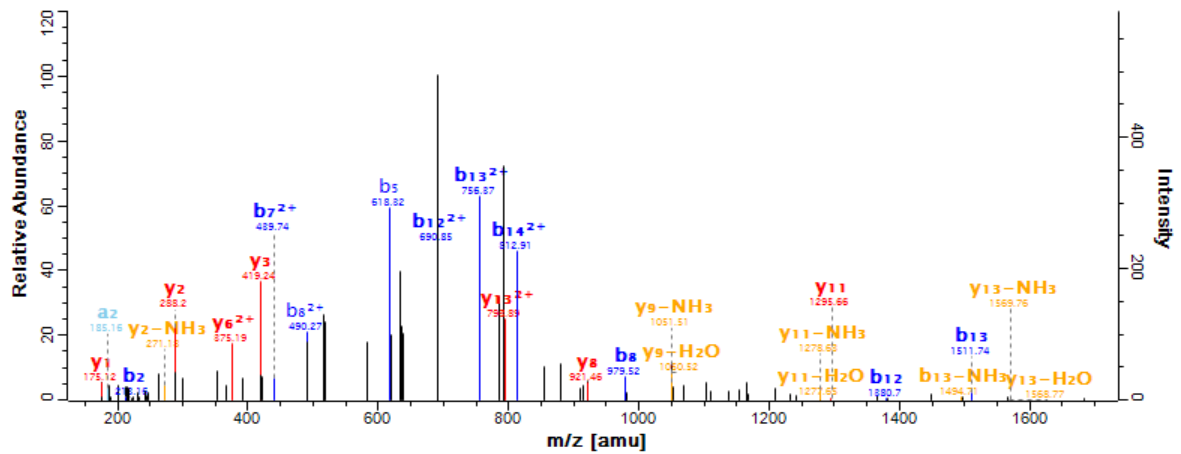



**Protein Group ID:** 107  
**Protein Accession Numbers:** Q9P2B4; B1AMN7  
**Gene Names:** CTTNBP2NL  
**Peptide Sequence:** LSKPELLTLFSILEGELEAR  
**Total Number of Spectra:** 7  
**Number of Replicates (out of 10):** 5  
**Best Match Score:** 88.565  
**Best Match Posterior Error Probability:** 0.0007255  
**Best Match Spectrum:**

**Scan number** 8303      **Raw file** 20100927-KD-Batch4-Prt-OGE-WT-Frac14  
**Method** ITMS; CID      **Genenames** CTTNBP2NL

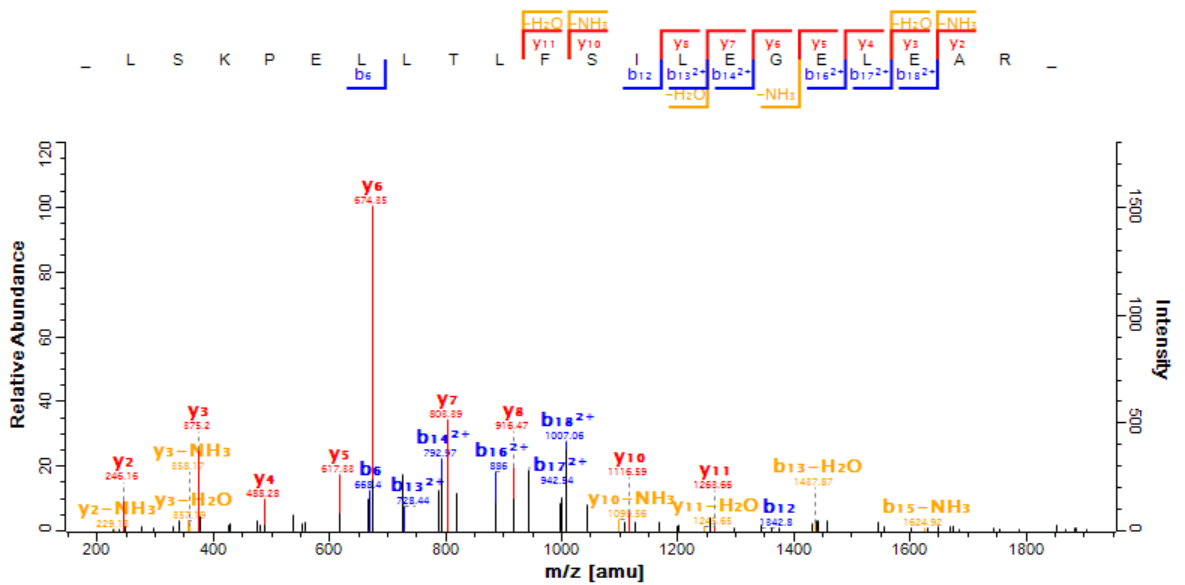

**Protein Group ID:** 108

**Protein Accession Numbers:** B1ANH2; B1ANH6; Q16774-2; B1ANH0; B1ANH5; Q16774

**Gene Names:** GUK1

**Peptide Sequence:** LAAQADMESSKEPGLFDVIVIIINDSLDQAAYAELEK

**Total Number of Spectra:** 2

**Number of Replicates (out of 10):** 2

**Best Match Score:** 104.84

**Best Match Posterior Error Probability:** 8.79E-19

**Best Match Spectrum:**

|                    |           |                  |                          |
|--------------------|-----------|------------------|--------------------------|
| <b>Scan number</b> | 5719      | <b>Raw file</b>  | Prt-OGE-Batch3-WT-Frac12 |
| <b>Method</b>      | ITMS: CID | <b>Genenames</b> | GUK1                     |

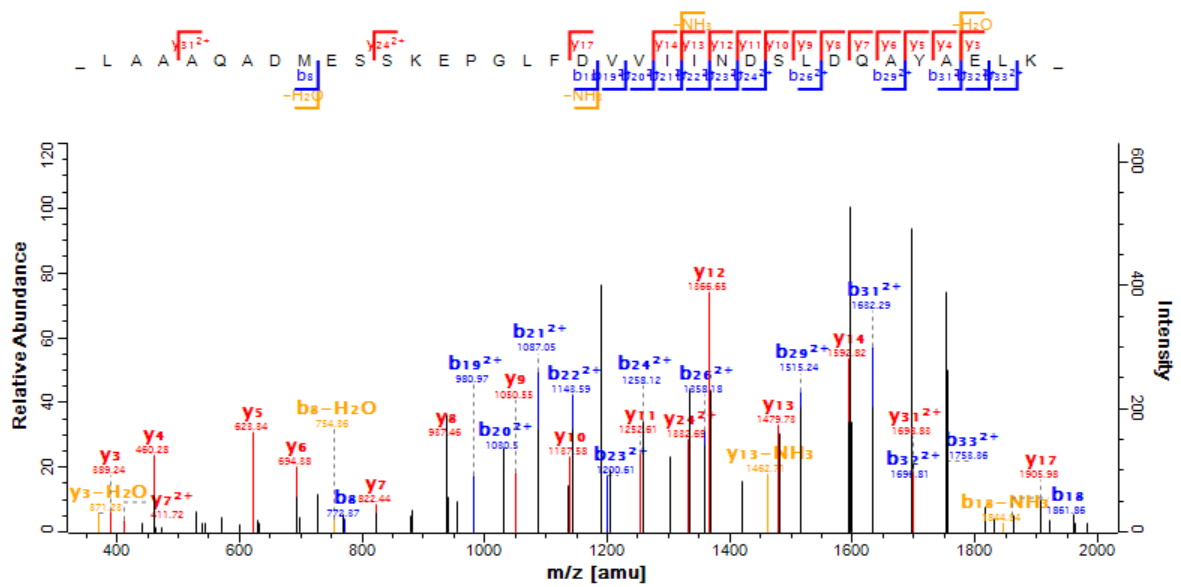

**Protein Group ID:** 112

**Protein Accession Numbers:** B1AZU4; Q5SPT7; E7EN49; E7EQP4; E7EWC3; F8W0J9; Q6ZUW0; D0EV57; B4DT81; F6R3U9; F6RUR5; B7Z760; F8VTQ8; H0Y4C2; H0Y5J2; H0Y5Q6; H0Y7Q7; H0Y7W0; H0Y805; P30511-3; P30511; E9PGX5; H0Y842

**Gene Names:** HLA-F

**Peptide Sequence:** WEQSPQPTIPIVGI VAGLVV LGA VV TGA VVA VMWR

**Total Number of Spectra:** 1

**Number of Replicates (out of 10):** 1

**Best Match Score:** 70.784

**Best Match Posterior Error Probability:** 2.41E-07

**Best Match Spectrum:**

|                    |           |                  |                                      |
|--------------------|-----------|------------------|--------------------------------------|
| <b>Scan number</b> | 11393     | <b>Raw file</b>  | 20100930-KD-Batch5-Prt-OGE-WT-Frac10 |
| <b>Method</b>      | ITMS: CID | <b>Genenames</b> | HLA-F                                |

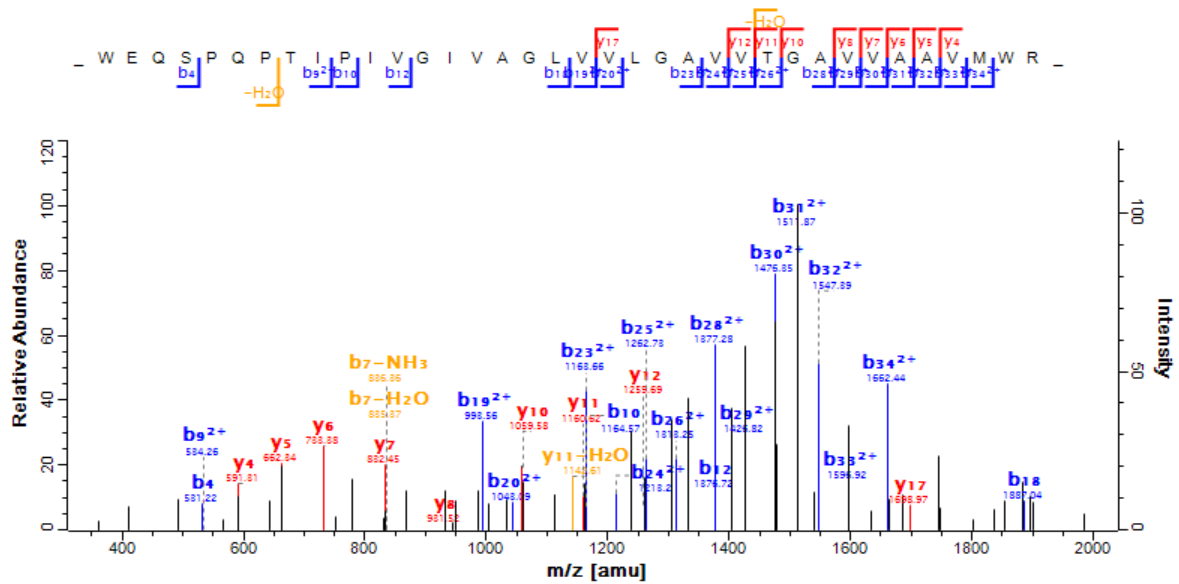

**Protein Group ID:** 114

**Protein Accession Numbers:** Q9P0M9; H7C5U8; B3KN43; D6RE11

**Gene Names:** MRPL27

**Peptide Sequence:** KMEGHYVHAGNIATQR

**Total Number of Spectra:** 1

**Number of Replicates (out of 10):** 1

**Best Match Score:** 115.8

**Best Match Posterior Error Probability:** 0.00034213

**Best Match Spectrum:**

**Scan number** 1542      **Raw file** 20100914-KD-Batch4-Prt-OGE-Mock-Frac19  
**Method** ITMS; CID      **Genenames** MRPL27

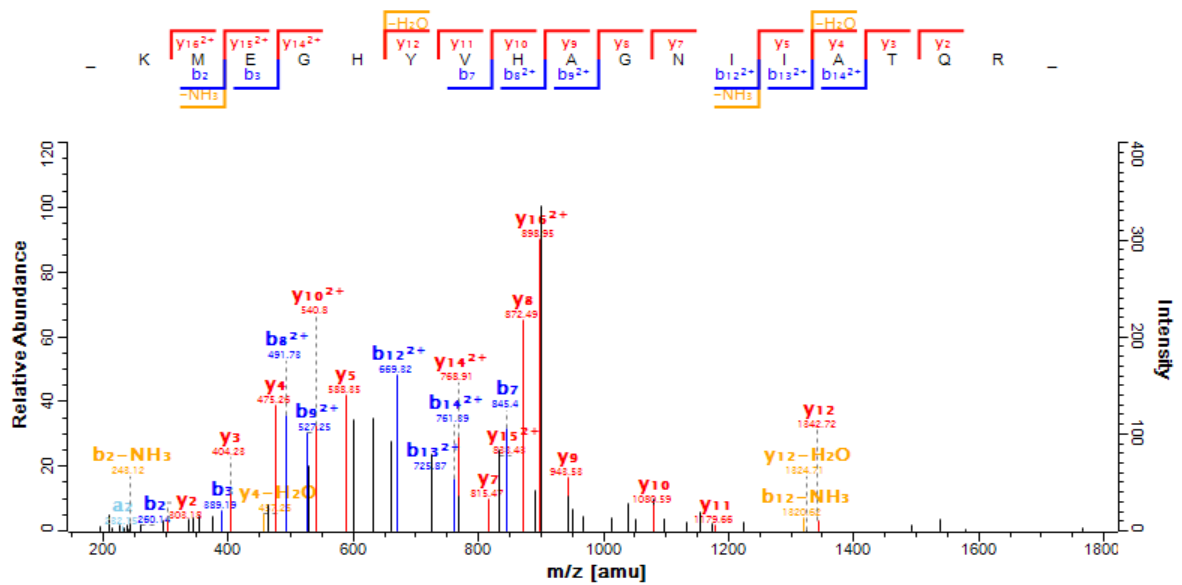

**Protein Group ID:** 127  
**Protein Accession Numbers:** Q9Y5X1; B3KXH8  
**Gene Names:** SNX9  
**Peptide Sequence:** HPVISESEVFQQFLNFR  
**Total Number of Spectra:** 2  
**Number of Replicates (out of 10):** 2  
**Best Match Score:** 128.96  
**Best Match Posterior Error Probability:** 3.76E-05  
**Best Match Spectrum:**

**Scan number** 5989      **Raw file** OGE-WT-Frac9  
**Method** ITMS; CID      **Genenames** SNX9

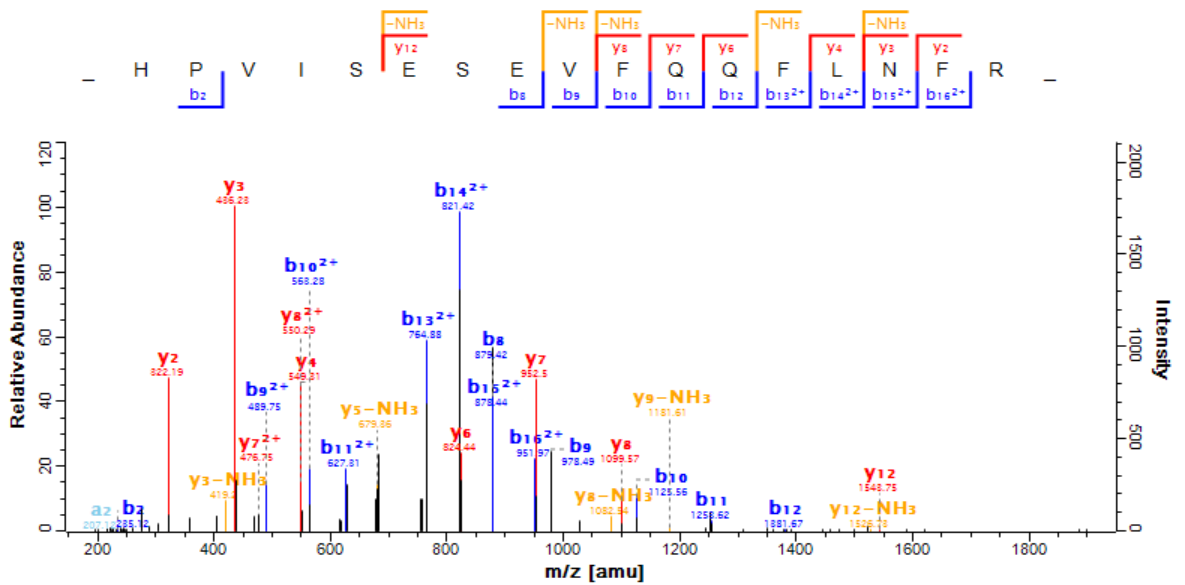

**Protein Group ID:** 129

**Protein Accession Numbers:** Q66PJ3; Q66PJ3-2; Q66PJ3-3; Q66PJ3-4; F5H7X4; F8WCT1; B3VOL1; H7BZV4; F5GYV5

**Gene Names:** ARL6IP4

**Peptide Sequence:** AEAQQVEALPGSLDQWHR

**Total Number of Spectra:** 4

**Number of Replicates (out of 10):** 4

**Best Match Score:** 114.29

**Best Match Posterior Error Probability:** 3.23E-05

**Best Match Spectrum:**

Scan number 4533 Raw file Prt-OGE-Batch2-Mock-Frac17  
Method ITMS: CID Genenames ARL6IP4

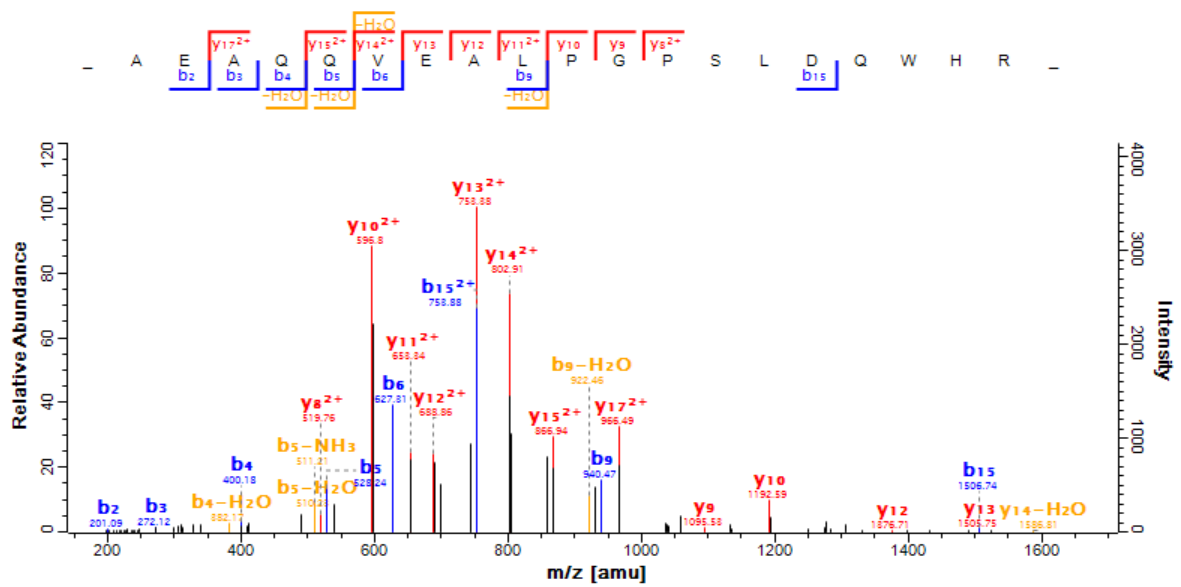

**Protein Group ID:** 130  
**Protein Accession Numbers:** Q8IZ73; B4DDD1  
**Gene Names:** RPUSD2  
**Peptide Sequence:** QDPLPQDLVMFLHALR  
**Total Number of Spectra:** 6  
**Number of Replicates (out of 10):** 5  
**Best Match Score:** 113.25  
**Best Match Posterior Error Probability:** 0.000126  
**Best Match Spectrum:**

**Scan number** 7444      **Raw file** 20100927-KD-Batch4-Prt-OGE-WT-Frac14  
**Method** ITMS; CID      **Genenames** RPUSD2

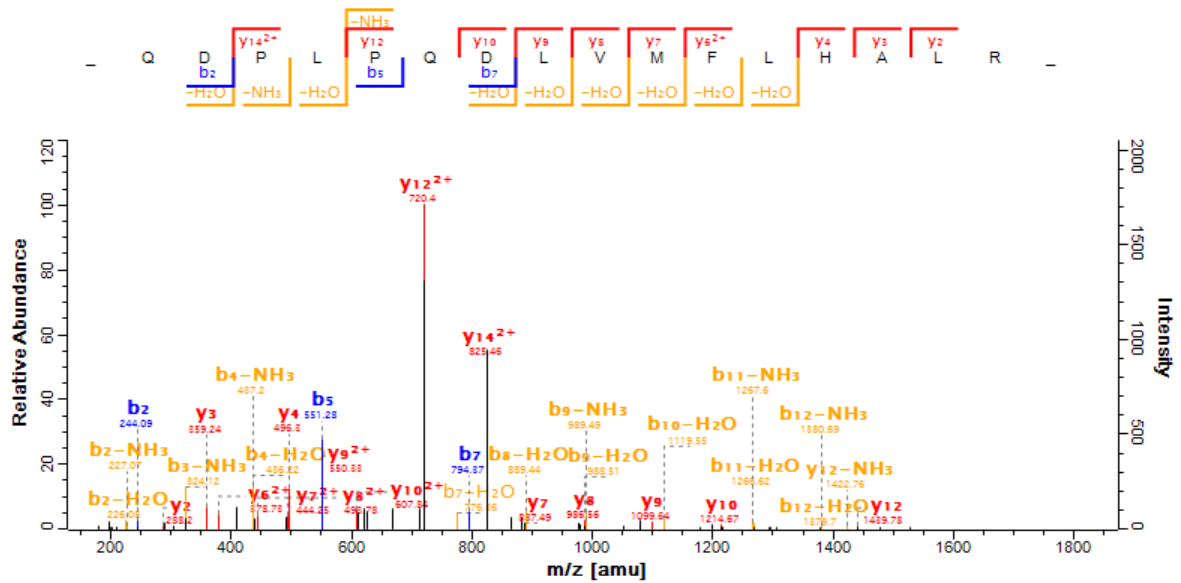

**Protein Group ID:** 132

**Protein Accession Numbers:** O96005; F5H8J3; B4DDS3; K7EQQ1

**Gene Names:** CLPTM1

**Peptide Sequence:** NLLTGETEADPEMIK

**Total Number of Spectra:** 1

**Number of Replicates (out of 10):** 1

**Best Match Score:** 108.34

**Best Match Posterior Error Probability:** 5.86E-05

**Best Match Spectrum:**

**Scan number** 2974      **Raw file** Prt-OGE-Batch3-WT-Frac1  
**Method** ITMS; CID      **Genenames** CLPTM1

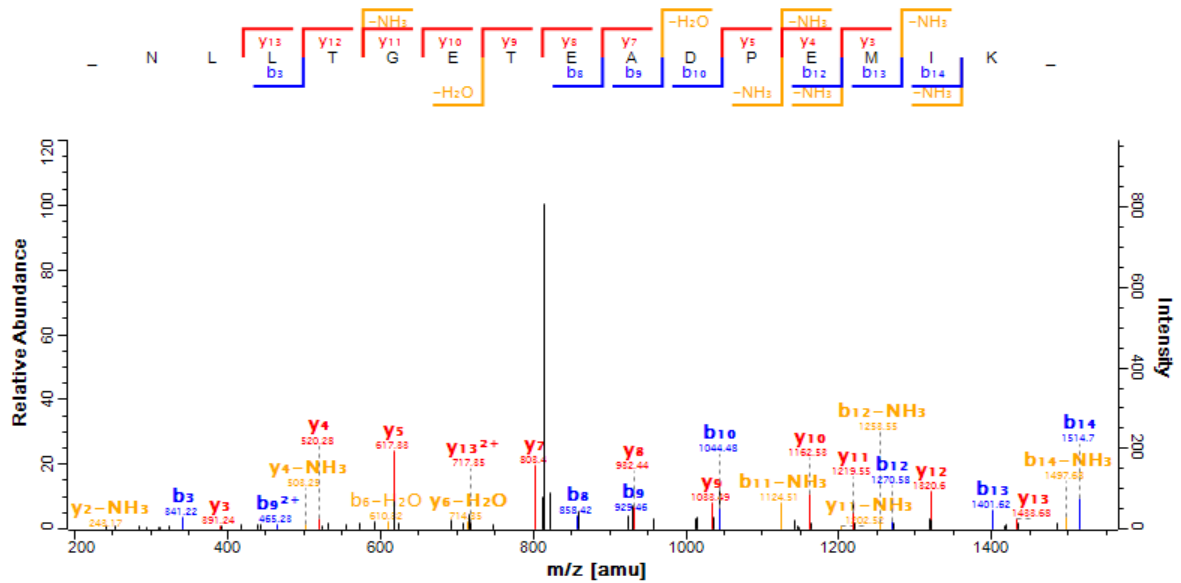



**Protein Group ID:** 133

**Protein Accession Numbers:** Q8N7V9; P54619; B4DDT7; F8VYY9; H0YIC9; F8W9D1

**Gene Names:** PRKAG1

**Peptide Sequence:** GIVSLSDILQALVLTGGEK

**Total Number of Spectra:** 9

**Number of Replicates (out of 10):** 8

**Best Match Score:** 160.45

**Best Match Posterior Error Probability:** 6.53E-12

**Best Match Spectrum:**

**Scan number** 6619      **Raw file** Prt-OGE-Batch2-WT-Frac15  
**Method** ITMS; CID      **Genenames** PRKAG1

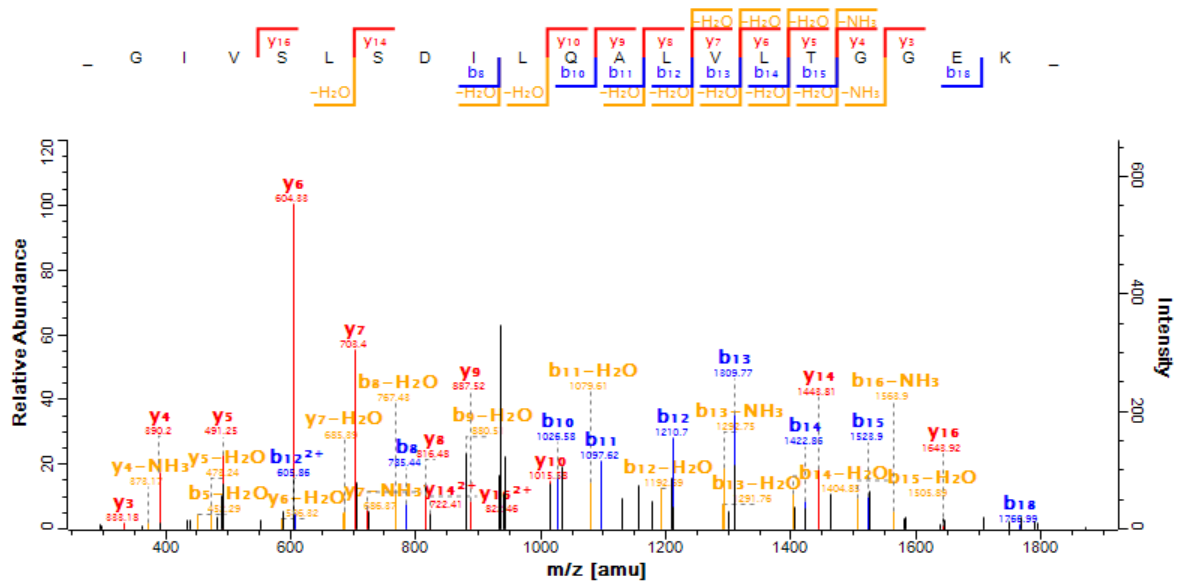

**Protein Group ID:** 138

**Protein Accession Numbers:** B4DFQ6; Q96CM8; B4DHT5; E9PF16; B4DUF5

**Gene Names:** ACSF2

**Peptide Sequence:** YIVFVTNYPLTISGK

**Total Number of Spectra:** 1

**Number of Replicates (out of 10):** 1

**Best Match Score:** 121.31

**Best Match Posterior Error Probability:** 4.44E-05

**Best Match Spectrum:**

|                    |           |                  |                            |
|--------------------|-----------|------------------|----------------------------|
| <b>Scan number</b> | 6162      | <b>Raw file</b>  | Prt-OGE-Batch2-Mock-Frac15 |
| <b>Method</b>      | ITMS; CID | <b>Genenames</b> | ACSF2                      |

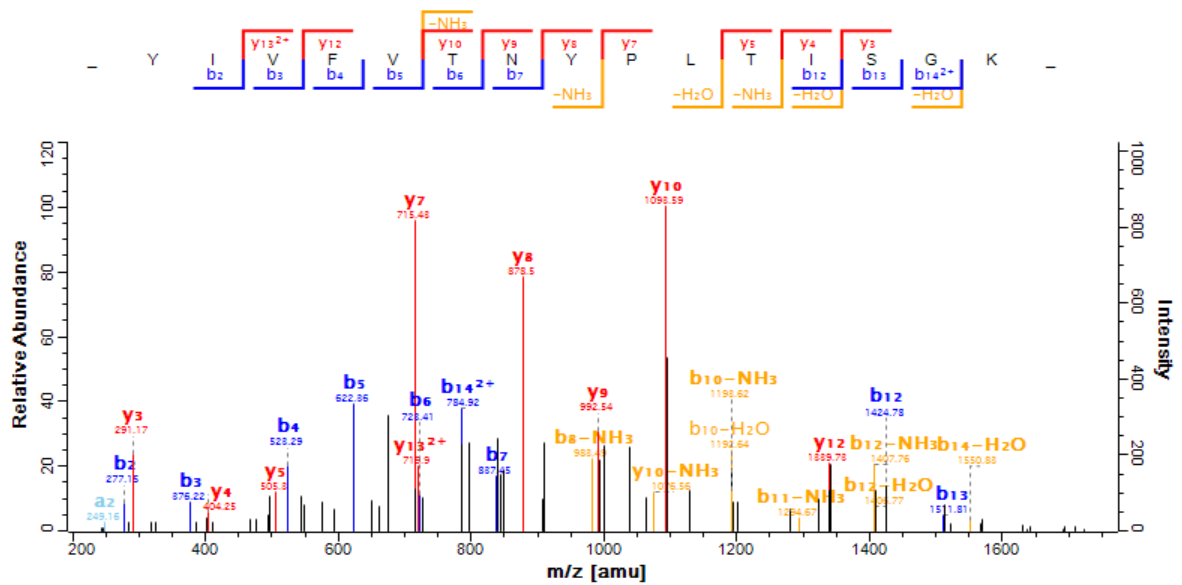

**Protein Group ID:** 139

**Protein Accession Numbers:** Q969G3; B4DGM3; C0IMW4; Q969G3-2; B4DFR4; C0IMW5; C0IMW7; J3QKS7; K7EMQ8; H7C048

**Gene Names:** SMARCE1

**Peptide Sequence:** IAAEIAQAEEQAR

**Total Number of Spectra:** 2

**Number of Replicates (out of 10):** 2

**Best Match Score:** 141.54

**Best Match Posterior Error Probability:** 1.67E-05

**Best Match Spectrum:**

Scan number 2118 Raw file 20100914-KD-Batch4-Prt-OGE-Mock-Frac16  
Method ITMS: CID Genenames SMARCE1

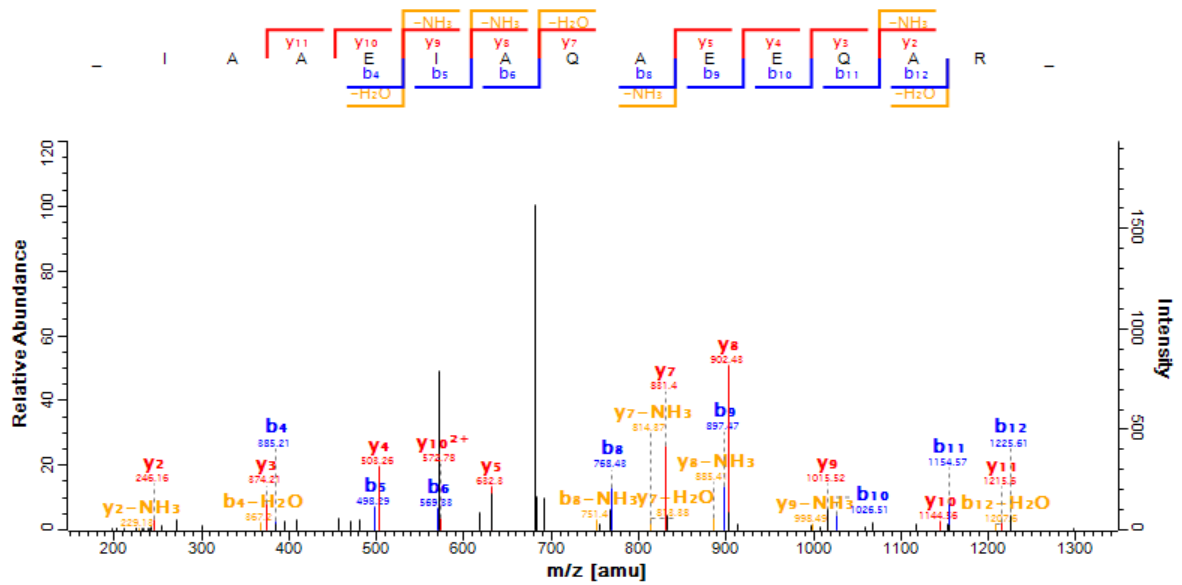

**Protein Group ID:** 143

**Protein Accession Numbers:** O95273; O95273-2; O95273-3; O95273-4; B4DHB5

**Gene Names:** CCNDBP1

**Peptide Sequence:** AAALLMLTK

**Total Number of Spectra:** 1

**Number of Replicates (out of 10):** 1

**Best Match Score:** 115.71

**Best Match Posterior Error Probability:** 0.00035571

**Best Match Spectrum:**

**Scan number** 3791      **Raw file** Prt-OGE-Batch3--Mock-Frac4  
**Method** ITMS; CID      **Genenames** CCNDBP1

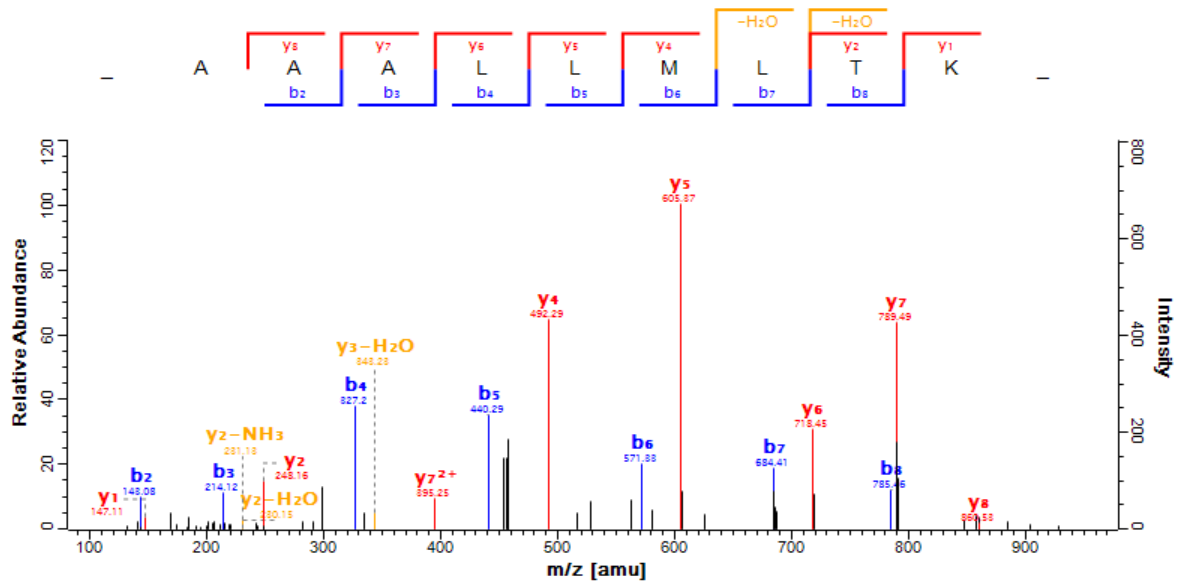

**Protein Group ID:** 147

**Protein Accession Numbers:** B4DIY7; C9J2U4; Q96BW9

**Gene Names:** TAMM41

**Peptide Sequence:** SQGWLEIDKSPGQFTQLMTPK

**Total Number of Spectra:** 2

**Number of Replicates (out of 10):** 2

**Best Match Score:** 100.53

**Best Match Posterior Error Probability:** 1.26E-06

**Best Match Spectrum:**

|                    |           |                  |                                      |
|--------------------|-----------|------------------|--------------------------------------|
| <b>Scan number</b> | 6065      | <b>Raw file</b>  | 20100927-KD-Batch4-Prt-OGE-WT-Frac21 |
| <b>Method</b>      | ITMS; CID | <b>Genenames</b> | TAMM41                               |

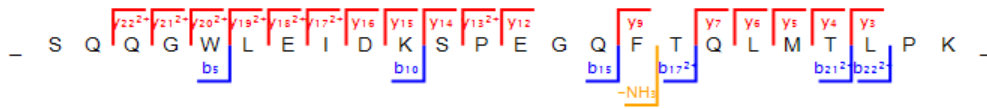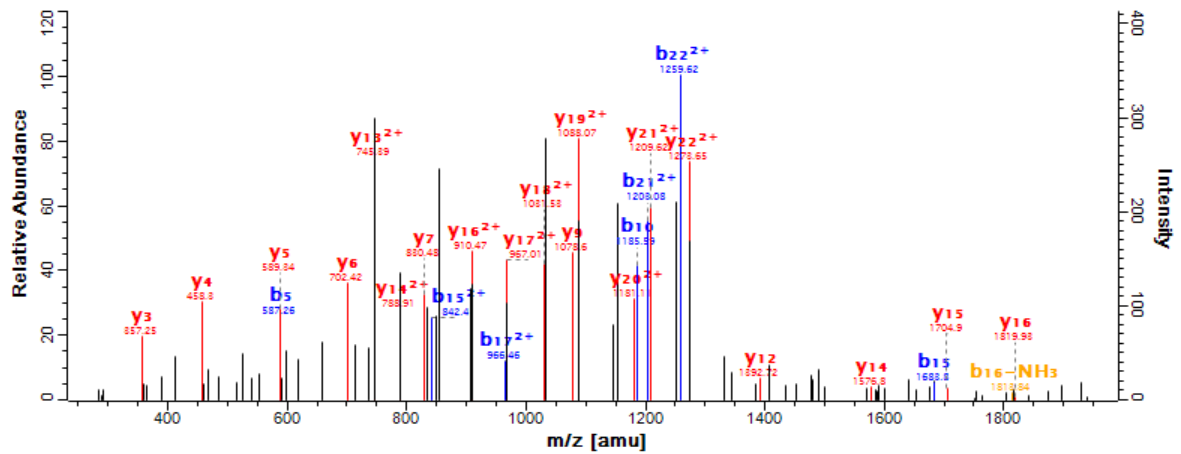

**Protein Group ID:** 150

**Protein Accession Numbers:** B4DJK3; P01033; H0Y789; Q5H9A7

**Gene Names:** TIMP1

**Peptide Sequence:** LQDGLLHITTCSTFVAVPWNSLSLAQR

**Total Number of Spectra:** 1

**Number of Replicates (out of 10):** 1

**Best Match Score:** 78.354

**Best Match Posterior Error Probability:** 1.54E-05

**Best Match Spectrum:**

**Scan number** 6414      **Raw file** 20100917-KD-Batch5-Prt-OGE-Mock-Frac20  
**Method** ITMS; CID      **Genenames** TIMP1

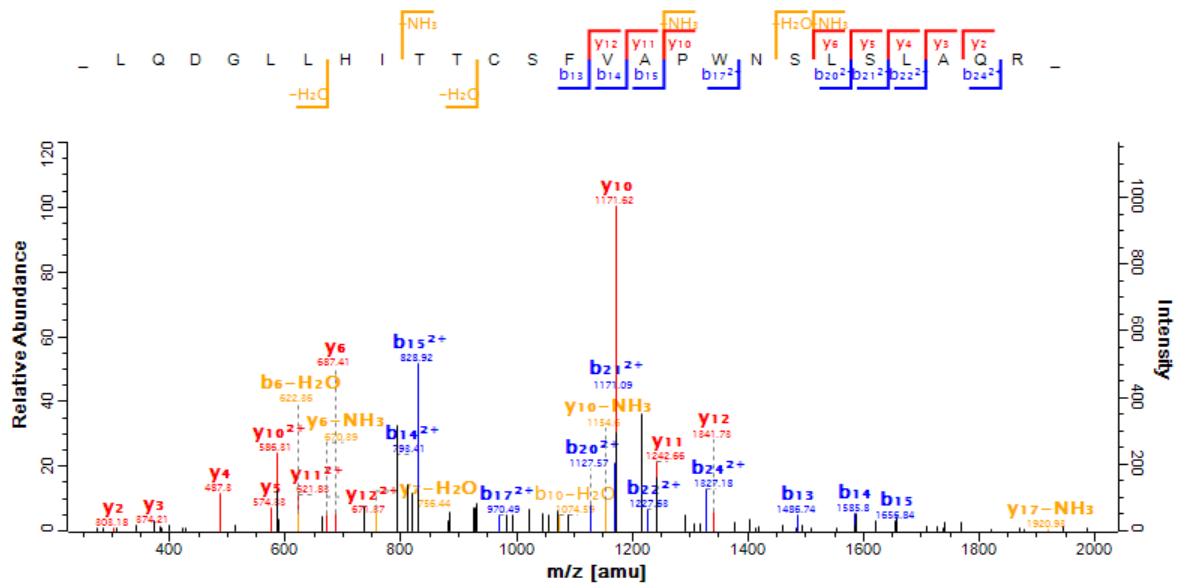

**Protein Group ID:** 156

**Protein Accession Numbers:** Q9BV36; Q9BV36-2; B4DKW7; Q9BV36-3; G5E9G5; C9JKV5; C9JI01

**Gene Names:** MLPH

**Peptide Sequence:** LTDEEAQHVLEVVQR

**Total Number of Spectra:** 2

**Number of Replicates (out of 10):** 1

**Best Match Score:** 89.507

**Best Match Posterior Error Probability:** 0.00035733

**Best Match Spectrum:**

|                    |           |                  |                            |
|--------------------|-----------|------------------|----------------------------|
| <b>Scan number</b> | 3231      | <b>Raw file</b>  | Prt-OGE-Batch3-Mock-Frac15 |
| <b>Method</b>      | ITMS; CID | <b>Genenames</b> | MLPH                       |

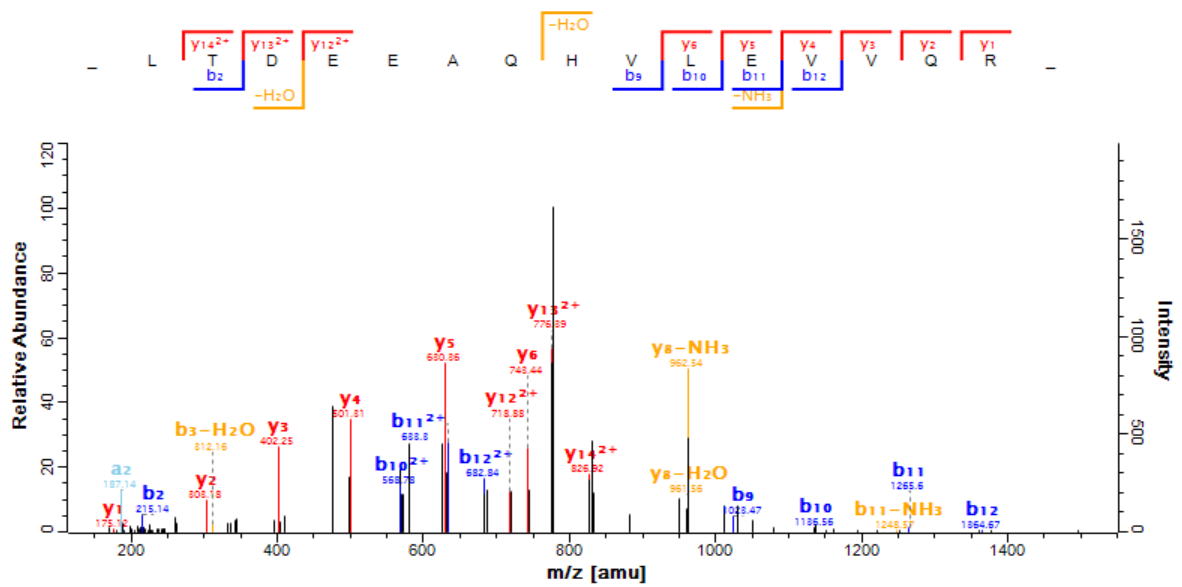

**Protein Group ID:** 160

**Protein Accession Numbers:** B4DLN1; Q9UBX3-2; Q9UBX3; B4E1E9; I3L1E8

**Gene Names:** SLC25A10

**Peptide Sequence:** VLLGSVSLAGGFVGTADLVNVR

**Total Number of Spectra:** 2

**Number of Replicates (out of 10):** 2

**Best Match Score:** 65.149

**Best Match Posterior Error Probability:** 0.00049514

**Best Match Spectrum:**

|                    |           |                  |                                        |
|--------------------|-----------|------------------|----------------------------------------|
| <b>Scan number</b> | 5703      | <b>Raw file</b>  | 20100914-KD-Batch4-Prt-OGE-Mock-Frac23 |
| <b>Method</b>      | ITMS; CID | <b>Genenames</b> | SLC25A10                               |

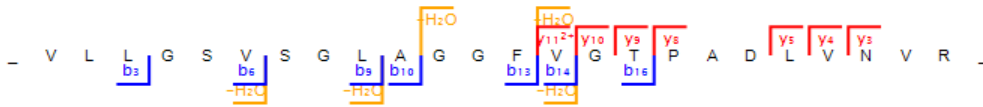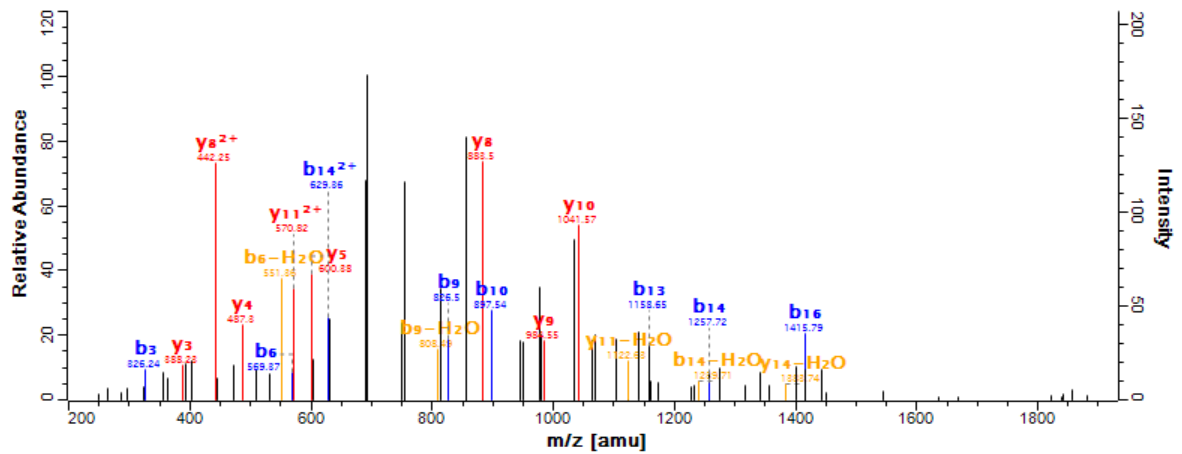



**Protein Group ID:** 164

**Protein Accession Numbers:** Q9NSK0-3; Q9NSK0; B4DME9; Q9NSK0-4; C9J8T5

**Gene Names:** KLC4

**Peptide Sequence:** GHPDVATMLNLALVYR

**Total Number of Spectra:** 9

**Number of Replicates (out of 10):** 5

**Best Match Score:** 83.692

**Best Match Posterior Error Probability:** 0.00083308

**Best Match Spectrum:**

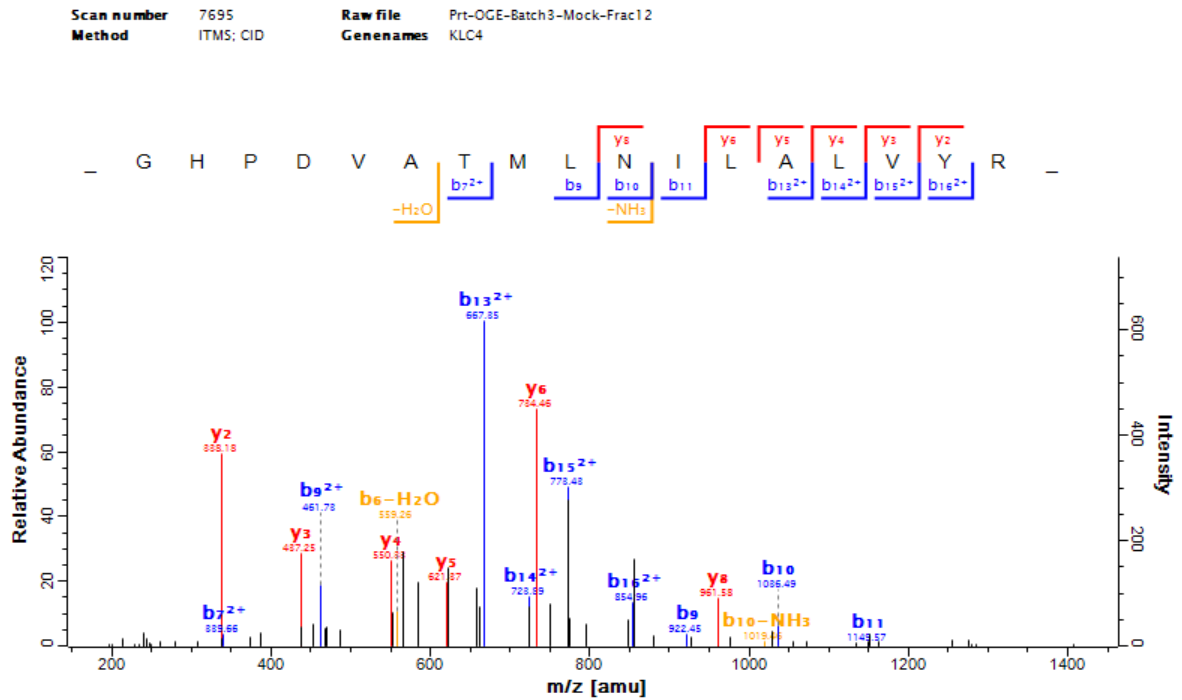

**Protein Group ID:** 166

**Protein Accession Numbers:** P00750; P00750-3; E7ESF4; B4DN26; B4DNJ1; P00750-4; K4DI88; P00750-2

**Gene Names:** PLAT

**Peptide Sequence:** VYTAQNPSAQLGLGK

**Total Number of Spectra:** 1

**Number of Replicates (out of 10):** 1

**Best Match Score:** 93.424

**Best Match Posterior Error Probability:** 0.00033096

**Best Match Spectrum:**

Scan number 2545 Raw file OGE-WT-Frac1  
Method ITMS: CID Genenames PLAT

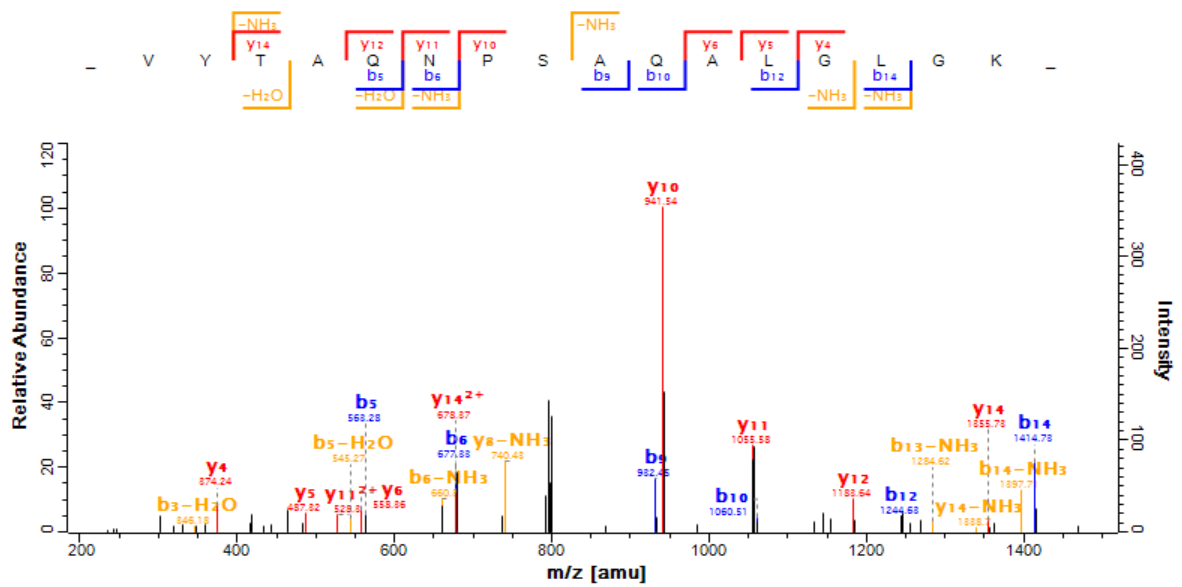

**Protein Group ID:** 172

**Protein Accession Numbers:** Q9NVM9; B4DNK1; H0YH12

**Gene Names:** Asun;ASUN

**Peptide Sequence:** GPVSLLSLWSNR

**Total Number of Spectra:** 3

**Number of Replicates (out of 10):** 3

**Best Match Score:** 94.191

**Best Match Posterior Error Probability:** 0.00065178

**Best Match Spectrum:**

|                    |           |                  |                            |
|--------------------|-----------|------------------|----------------------------|
| <b>Scan number</b> | 6562      | <b>Raw file</b>  | Prt-OGE-Batch2-Mock-Frac14 |
| <b>Method</b>      | ITMS; CID | <b>Genenames</b> | Asun;ASUN                  |

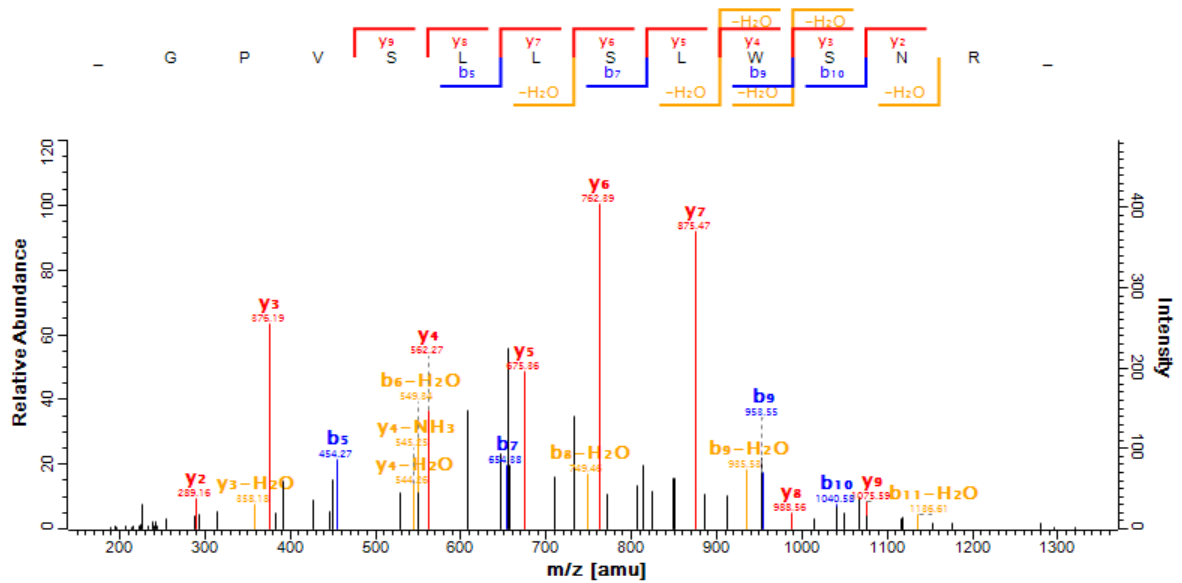

**Protein Group ID:** 176  
**Protein Accession Numbers:** Q9BW60; B4DP24  
**Gene Names:** ELOVL1  
**Peptide Sequence:** MEAVVNLYQEVMK  
**Total Number of Spectra:** 17  
**Number of Replicates (out of 10):** 7  
**Best Match Score:** 119.25  
**Best Match Posterior Error Probability:** 0.00010741  
**Best Match Spectrum:**

**Scan number** 6776      **Raw file** Prt-OGE-Batch2-WT-Frac14  
**Method** ITMS; CID      **Genenames** ELOVL1

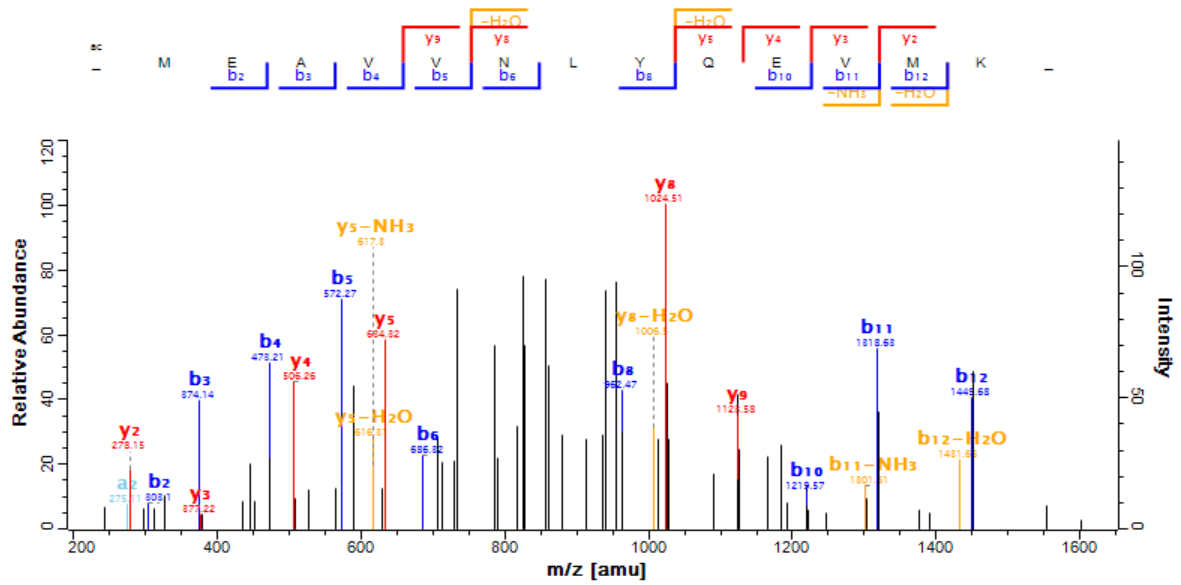

**Protein Group ID:** 179

**Protein Accession Numbers:** E7EQZ4; Q16637; Q16637-3; Q16637-2; Q16637-4; B4DP61; I3L4C1; H0YBZ9

**Gene Names:** SMN1

**Peptide Sequence:** SAPWNSFLPPPPMPGPR

**Total Number of Spectra:** 7

**Number of Replicates (out of 10):** 6

**Best Match Score:** 82.349

**Best Match Posterior Error Probability:** 0.0009698

**Best Match Spectrum:**

Scan number 6373 Raw file Prt-OGE-Batch2-Mock-Frac13  
Method ITMS: CID Genenames SMN1

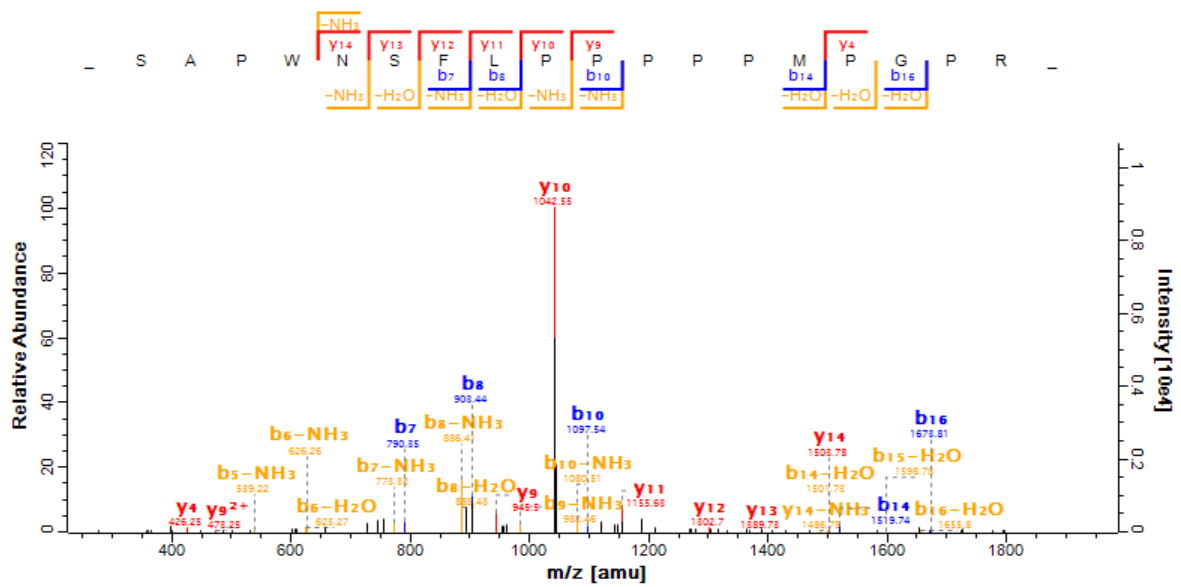

**Protein Group ID:** 181  
**Protein Accession Numbers:** Q9NYL2-2; B4DQ47  
**Gene Names:** ZAK  
**Peptide Sequence:** LTEQSNTPLLLPLAAR  
**Total Number of Spectra:** 1  
**Number of Replicates (out of 10):** 1  
**Best Match Score:** 133.48  
**Best Match Posterior Error Probability:** 1.72E-05  
**Best Match Spectrum:**

**Scan number** 5491      **Raw file** 20100914-KD-Batch4-Prt-OGE-Mock-Frac12  
**Method** ITMS; CID      **Genenames** ZAK

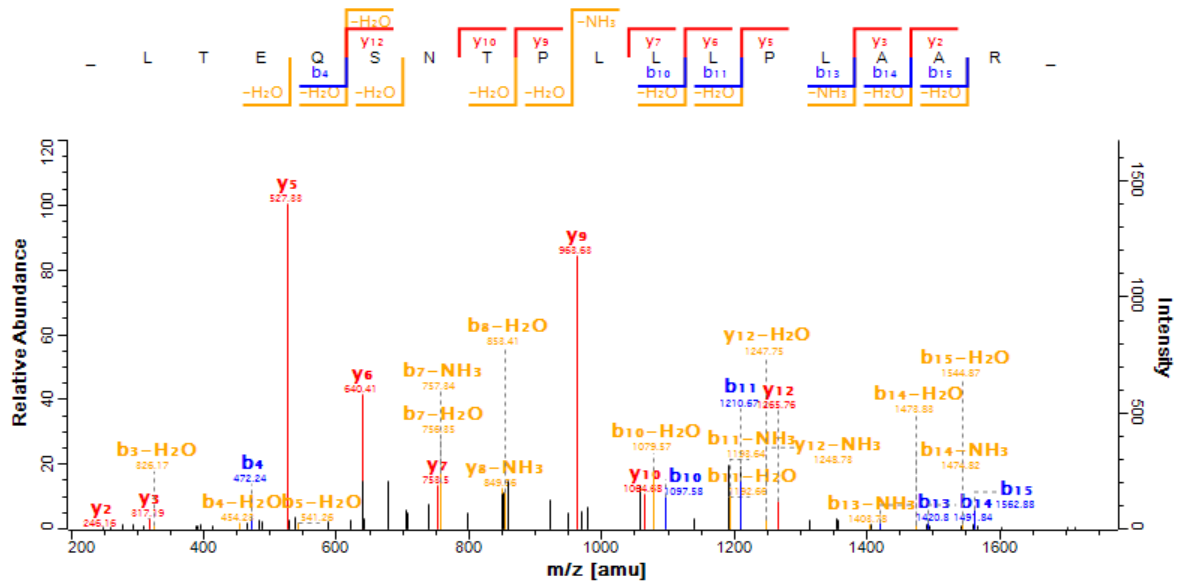

**Protein Group ID:** 182

**Protein Accession Numbers:** G5E9T8; O95249; E9PCW1; K7EJC8; J3KST5; B4DQA8

**Gene Names:** GOSR1

**Peptide Sequence:** MFETMAIEIEQLLAR

**Total Number of Spectra:** 1

**Number of Replicates (out of 10):** 1

**Best Match Score:** 111.79

**Best Match Posterior Error Probability:** 5.63E-05

**Best Match Spectrum:**

|                    |           |                  |                                      |
|--------------------|-----------|------------------|--------------------------------------|
| <b>Scan number</b> | 8211      | <b>Raw file</b>  | 20100930-KD-Batch5-Prt-OGE-WT-Frac11 |
| <b>Method</b>      | ITMS; CID | <b>Genenames</b> | GOSR1                                |

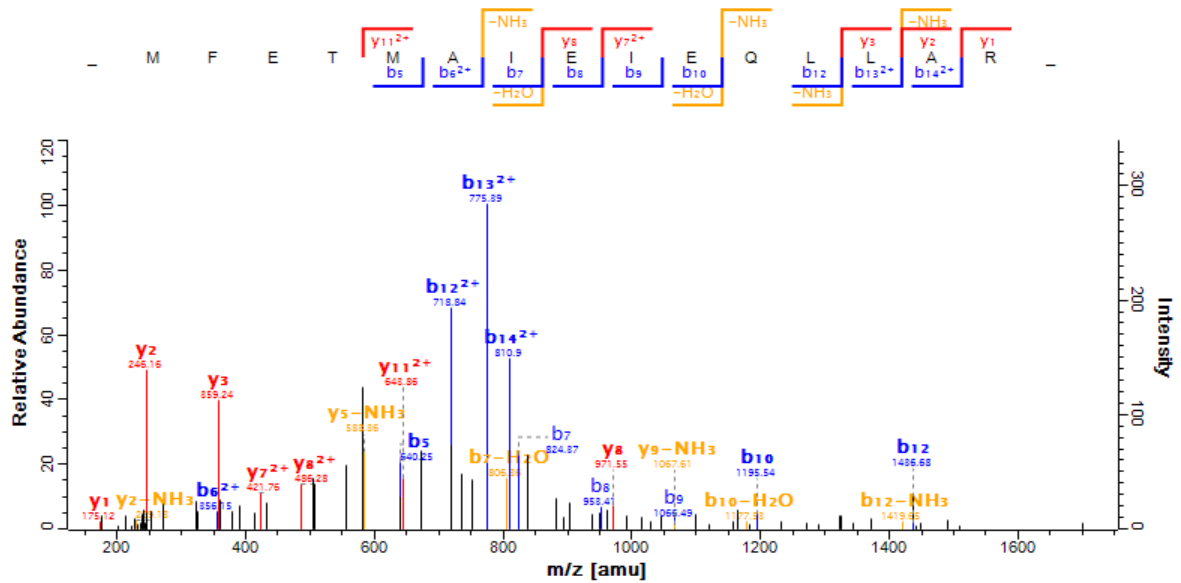

**Protein Group ID:** 183

**Protein Accession Numbers:** Q9BW92; Q9H9V2; Q5T5F2; B4DQF3

**Gene Names:** TARS2

**Peptide Sequence:** LGLFEELWAAQVK

**Total Number of Spectra:** 1

**Number of Replicates (out of 10):** 1

**Best Match Score:** 100.55

**Best Match Posterior Error Probability:** 0.0005437

**Best Match Spectrum:**

**Scan number** 7037      **Raw file** Prt-OGE-Batch2-Mock-Frac15  
**Method** ITMS; CID      **Genenames** TARS2

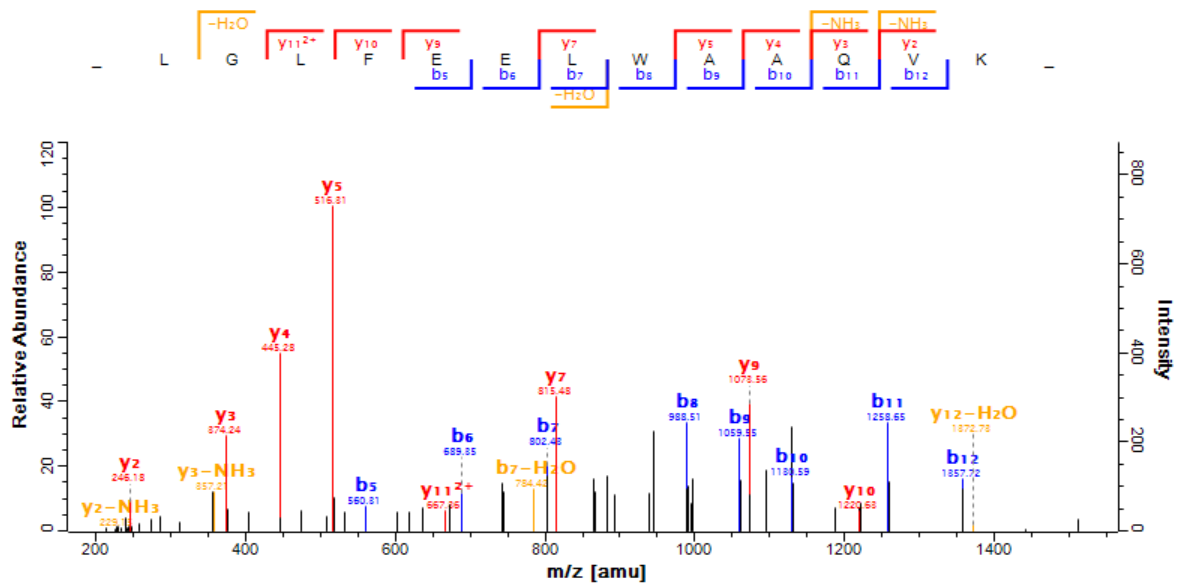



**Protein Group ID:** 188  
**Protein Accession Numbers:** Q92625; B4DQW8  
**Gene Names:** ANKS1A  
**Peptide Sequence:** GKEQELLEAAR  
**Total Number of Spectra:** 2  
**Number of Replicates (out of 10):** 2  
**Best Match Score:** 211.64  
**Best Match Posterior Error Probability:** 9.53E-29  
**Best Match Spectrum:**

**Scan number** 2762      **Raw file** Prt-OGE-Batch3-WT-Frac13  
**Method** ITMS; CID      **Genenames** ANKS1A

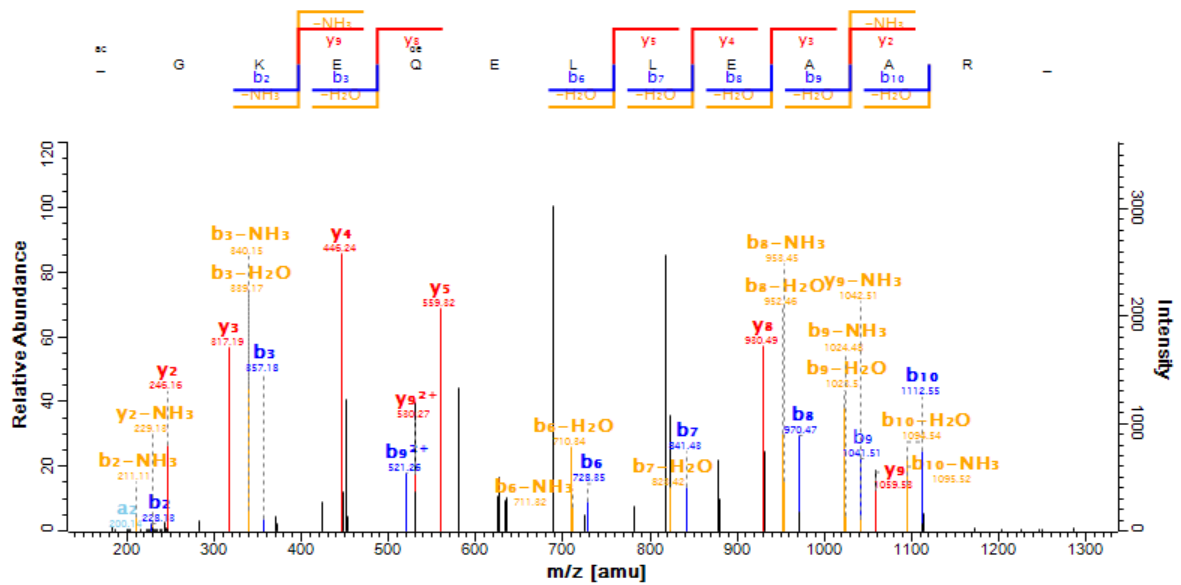

**Protein Group ID:** 189

**Protein Accession Numbers:** Q86UY6; B4DR03; F5H2C9

**Gene Names:** NAA40

**Peptide Sequence:** LGDPLEAFPVK

**Total Number of Spectra:** 1

**Number of Replicates (out of 10):** 1

**Best Match Score:** 114.82

**Best Match Posterior Error Probability:** 0.00021262

**Best Match Spectrum:**

**Scan number** 6698      **Raw file** Prt-OGE-Batch2-Mock-Frac17  
**Method** ITMS; CID      **Genenames** NAA40

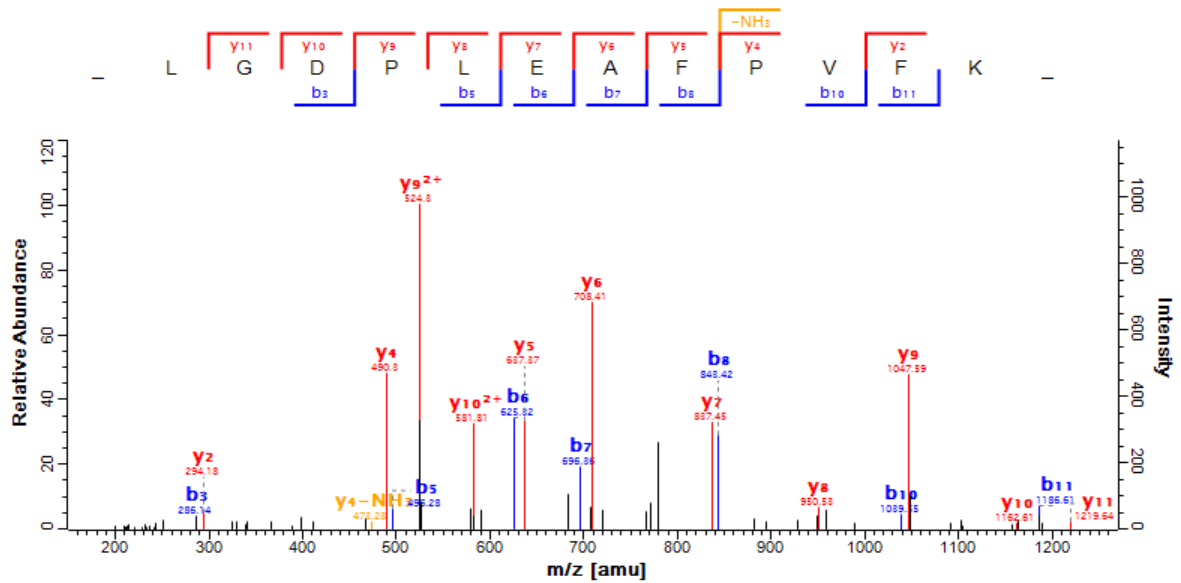

**Protein Group ID:** 196

**Protein Accession Numbers:** Q92973; Q92973-2; Q92973-3; E7EW37; B4DSC0; J3KPU5

**Gene Names:** TNPO1

**Peptide Sequence:** MEYEWKPDEQGLQQILQLLK

**Total Number of Spectra:** 26

**Number of Replicates (out of 10):** 9

**Best Match Score:** 147.64

**Best Match Posterior Error Probability:** 1.92E-09

**Best Match Spectrum:**

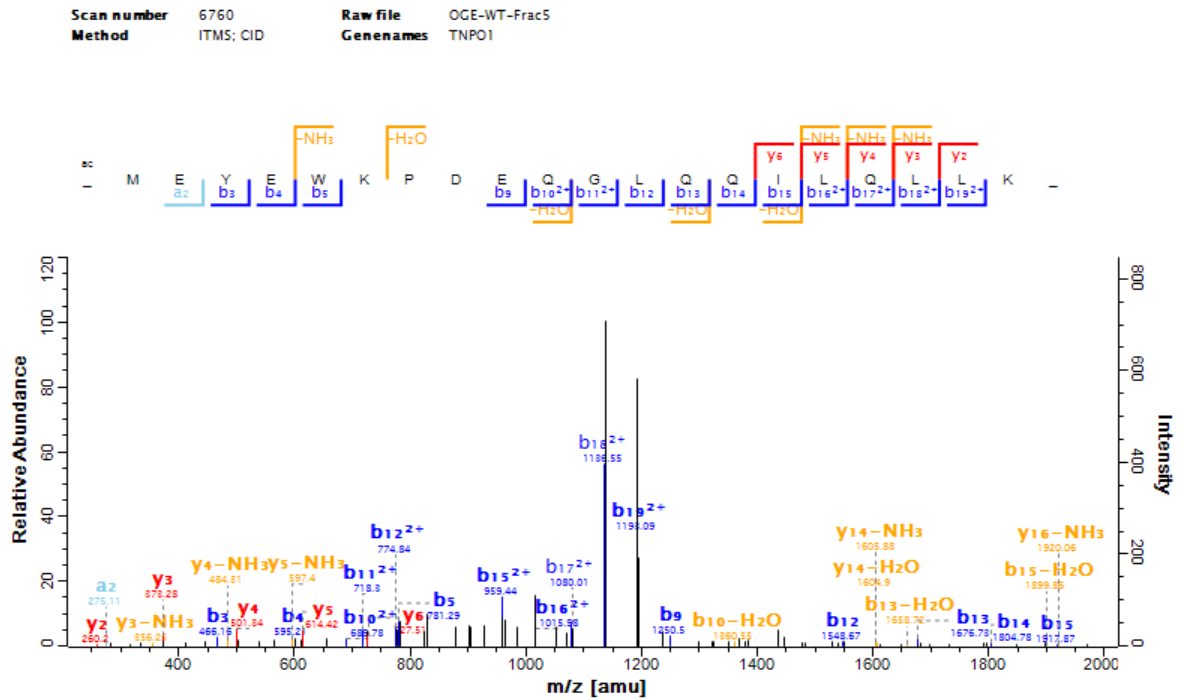

**Protein Group ID:** 200

**Protein Accession Numbers:** J3KMZ8; Q92785; B4DT58

**Gene Names:** DPF2

**Peptide Sequence:** EGLISQDGSSLEALLR

**Total Number of Spectra:** 2

**Number of Replicates (out of 10):** 2

**Best Match Score:** 165.34

**Best Match Posterior Error Probability:** 5.83E-15

**Best Match Spectrum:**

**Scan number** 6167      **Raw file** Prt-OGE-Batch3-Mock-Frac12  
**Method** ITMS; CID      **Genenames** DPF2

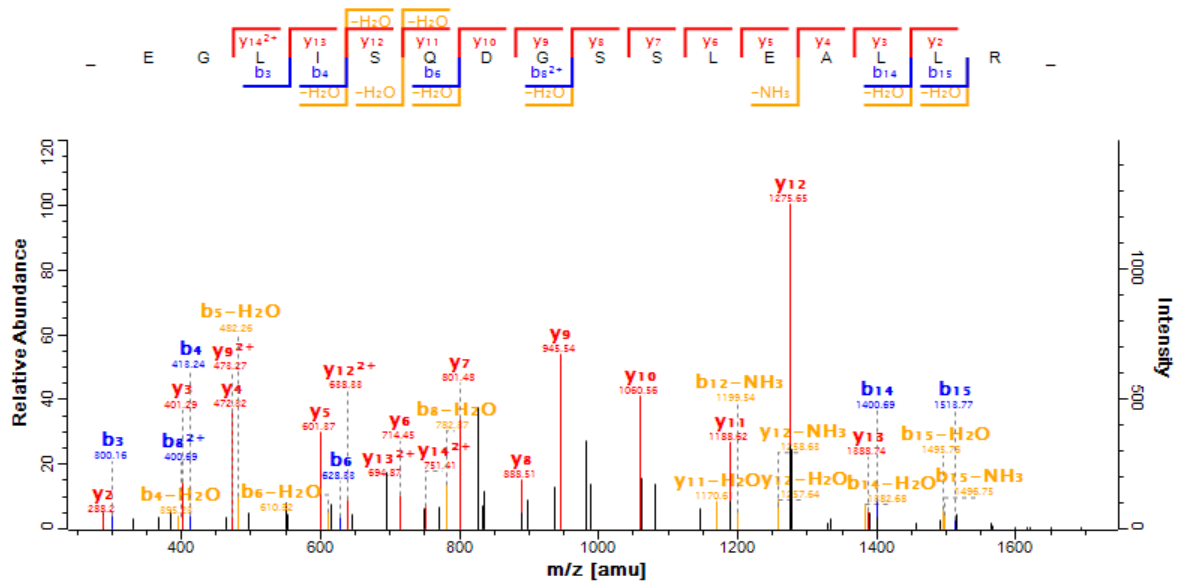

**Protein Group ID:** 204

**Protein Accession Numbers:** Q8ND24; B4DTD1; E9PN76

**Gene Names:** RNF214

**Peptide Sequence:** TTMAGLTMEELIQLVAAR

**Total Number of Spectra:** 5

**Number of Replicates (out of 10):** 3

**Best Match Score:** 95.57

**Best Match Posterior Error Probability:** 0.00031958

**Best Match Spectrum:**

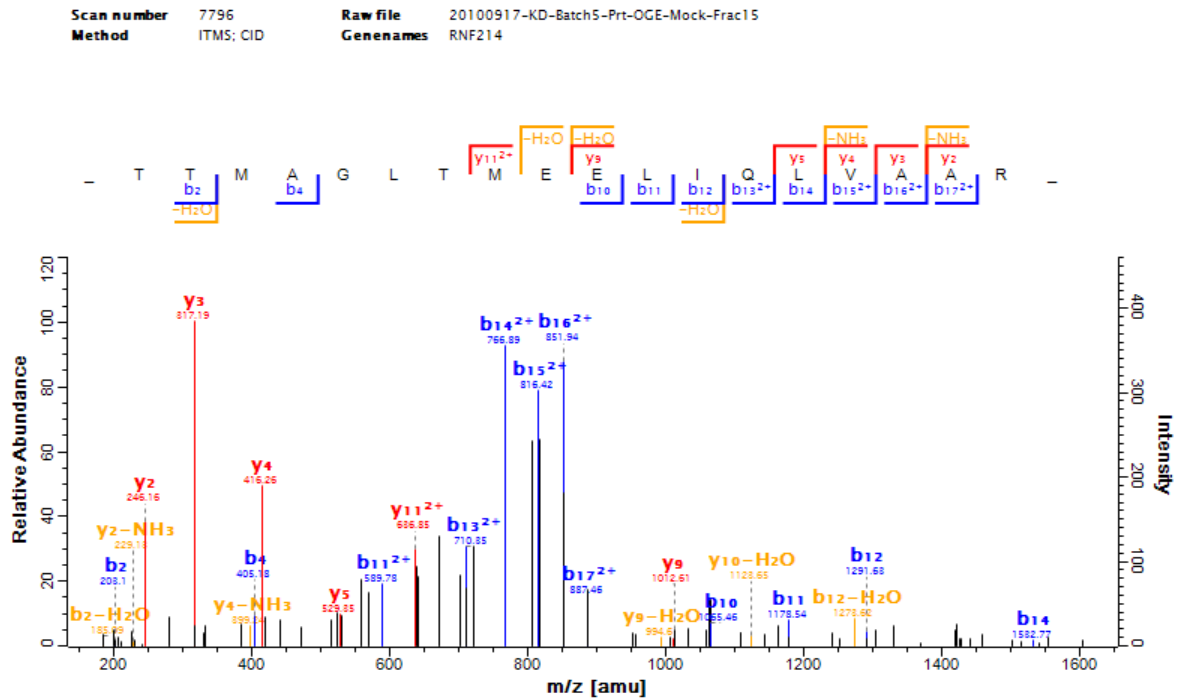

**Protein Group ID:** 205

**Protein Accession Numbers:** O15162; C9J7K9; C9JE06; C9J9P4; B4DTE8; C9J0H3

**Gene Names:** PLSCR1

**Peptide Sequence:** IIDNMGQEVITLRLR

**Total Number of Spectra:** 1

**Number of Replicates (out of 10):** 1

**Best Match Score:** 115.78

**Best Match Posterior Error Probability:** 0.0004844

**Best Match Spectrum:**

**Scan number** 5132      **Raw file** 20100930-KD-Batch5-Prt-OGE-WT-Frac12  
**Method** ITMS; CID      **Genenames** PLSCR1

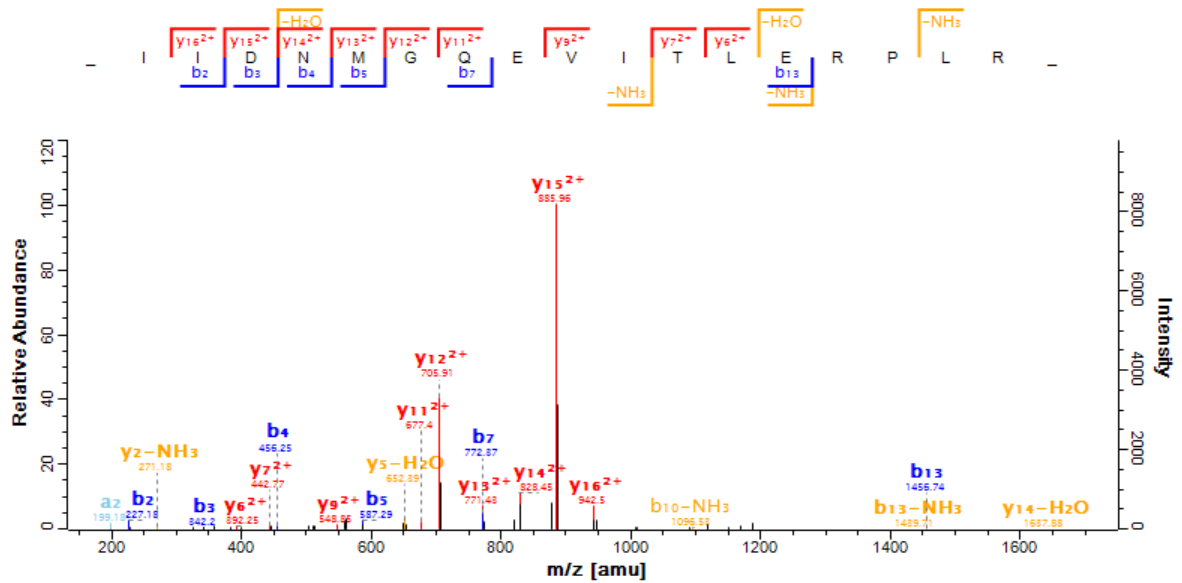

**Protein Group ID:** 207  
**Protein Accession Numbers:** Q12841; B4DTT5  
**Gene Names:** FSTL1  
**Peptide Sequence:** IIQWLEAEIIPDGWFSK  
**Total Number of Spectra:** 2  
**Number of Replicates (out of 10):** 2  
**Best Match Score:** 106.6  
**Best Match Posterior Error Probability:** 0.00017919  
**Best Match Spectrum:**

**Scan number** 6788      **Raw file** OGE-WT-Frac7  
**Method** ITMS; CID      **Genenames** FSTL1

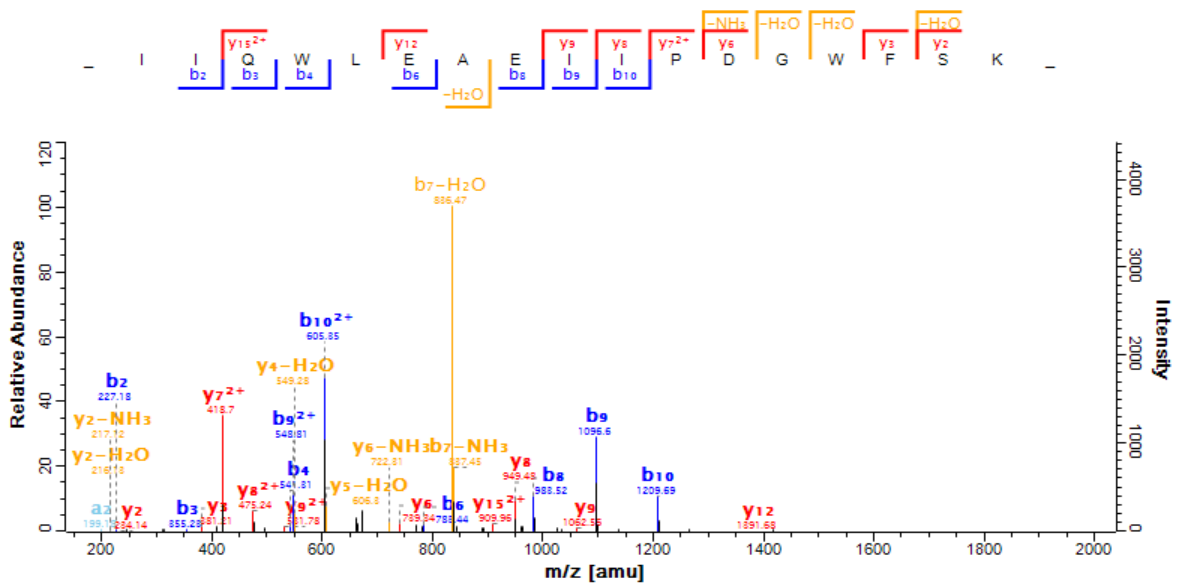

**Protein Group ID:** 211  
**Protein Accession Numbers:** Q9BRP7; B4DUU2  
**Gene Names:** FDXACB1  
**Peptide Sequence:** MLWTFDNRFLK  
**Total Number of Spectra:** 1  
**Number of Replicates (out of 10):** 1  
**Best Match Score:** 104.22  
**Best Match Posterior Error Probability:** 0.0080316  
**Best Match Spectrum:**

**Scan number** 2226      **Raw file** Prt-OGE-Batch2-WT-Frac20  
**Method** ITMS; CID      **Genenames** FDXACB1

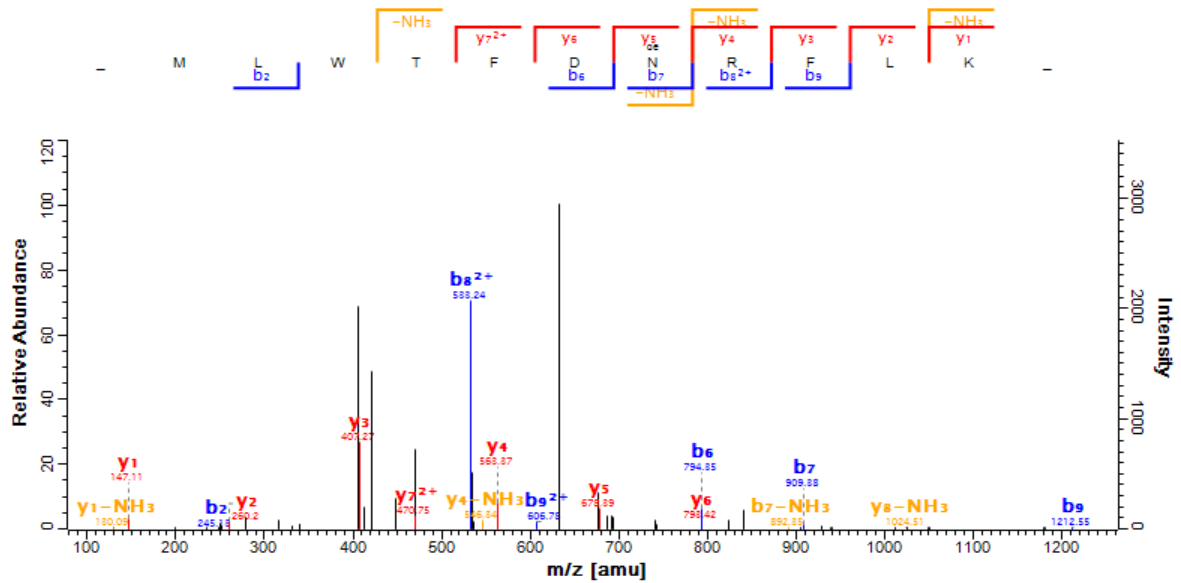



**Protein Group ID:** 214

**Protein Accession Numbers:** B4DW92; K7ES62; Q86WQ0

**Gene Names:** NR2C2AP

**Peptide Sequence:** VTFEDATDFFGR

**Total Number of Spectra:** 1

**Number of Replicates (out of 10):** 1

**Best Match Score:** 168.98

**Best Match Posterior Error Probability:** 3.29E-07

**Best Match Spectrum:**

**Scan number** 5487      **Raw file** Prt-OGE-Batch3--Mock-Frac10  
**Method** ITMS; CID      **Genenames** NR2C2AP

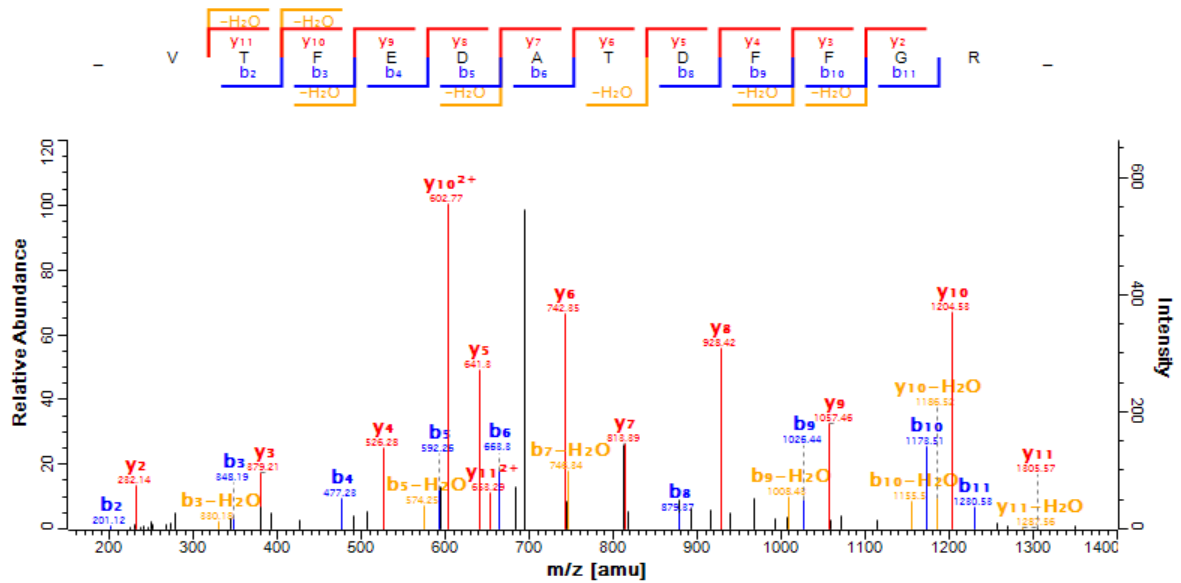

**Protein Group ID:** 215

**Protein Accession Numbers:** Q9Y6I4; H0YMI4; Q6JHV3; Q9Y6I4-2; H0YKU8; H0YLB7; B4DWJ6

**Gene Names:** USP3

**Peptide Sequence:** KFDPFLDLSLDIPSQFR

**Total Number of Spectra:** 4

**Number of Replicates (out of 10):** 4

**Best Match Score:** 101.78

**Best Match Posterior Error Probability:** 0.00056212

**Best Match Spectrum:**

|                    |           |                  |                                      |
|--------------------|-----------|------------------|--------------------------------------|
| <b>Scan number</b> | 6785      | <b>Raw file</b>  | 20100927-KD-Batch4-Prt-OGE-WT-Frac20 |
| <b>Method</b>      | ITMS; CID | <b>Genenames</b> | USP3                                 |

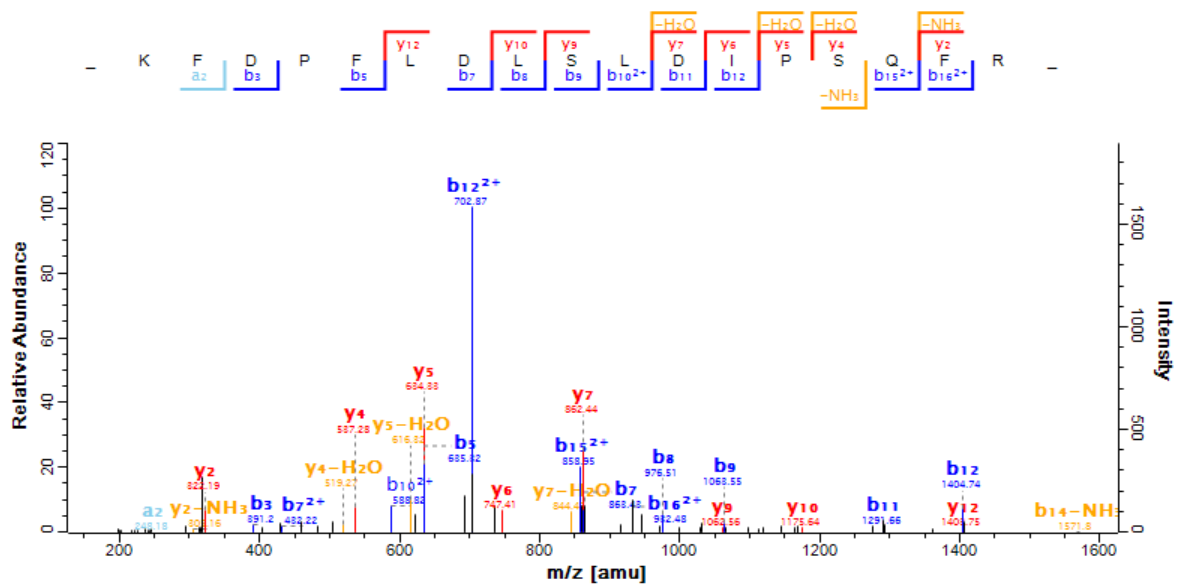

**Protein Group ID:** 216

**Protein Accession Numbers:** Q96F24; B4DWS0; Q96F24-2

**Gene Names:** NRBF2

**Peptide Sequence:** DIIPNLPLDFPSPLELPMLSEDLK

**Total Number of Spectra:** 4

**Number of Replicates (out of 10):** 3

**Best Match Score:** 86.08

**Best Match Posterior Error Probability:** 2.11E-07

**Best Match Spectrum:**

**Scan number** 9732      **Raw file** 20100930-KD-Batch5-Prt-OGE-WT-Frac10  
**Method** ITMS; CID      **Genenames** NRBF2

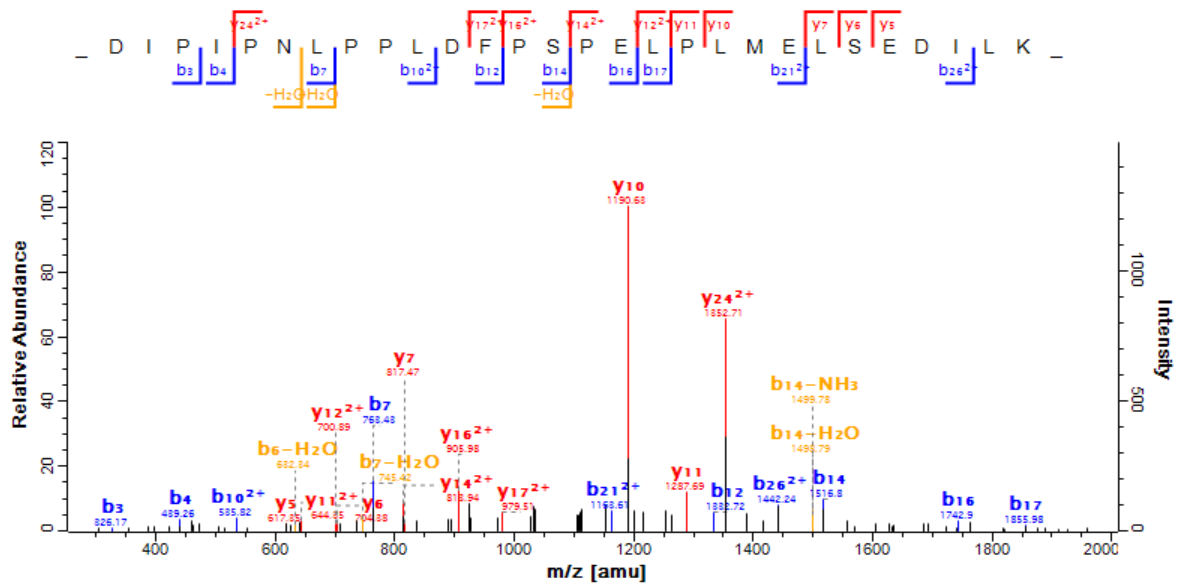

**Protein Group ID:** 217

**Protein Accession Numbers:** P40616; B4DWW1; B4DZG7; F8W1Z8

**Gene Names:** ARL1

**Peptide Sequence:** GTGLDEAMEWLVLK

**Total Number of Spectra:** 55

**Number of Replicates (out of 10):** 9

**Best Match Score:** 208.47

**Best Match Posterior Error Probability:** 9.46E-43

**Best Match Spectrum:**

**Scan number** 8553      **Raw file** 20100927-KD-Batch4-Prt-OGE-WT-Frac9  
**Method** ITMS; CID      **Genenames** ARL1

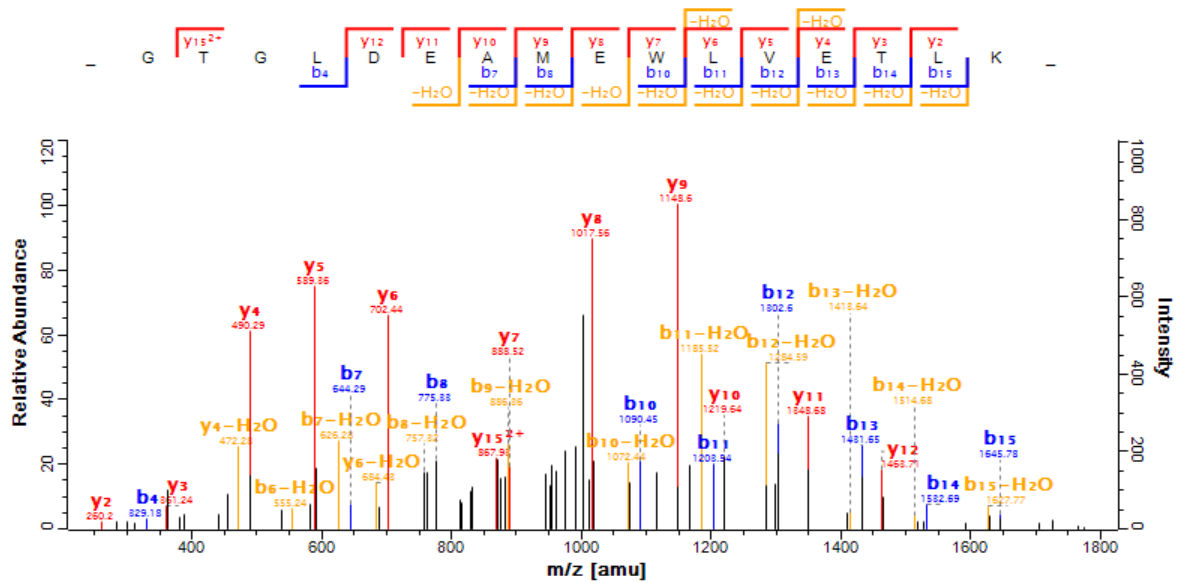

**Protein Group ID:** 221

**Protein Accession Numbers:** O15523; B4DXX7; C9J081

**Gene Names:** DDX3Y

**Peptide Sequence:** TAAFLLPILSQIYTDGPGEALK

**Total Number of Spectra:** 7

**Number of Replicates (out of 10):** 5

**Best Match Score:** 124.25

**Best Match Posterior Error Probability:** 2.81E-10

**Best Match Spectrum:**

|                    |           |                  |                                        |
|--------------------|-----------|------------------|----------------------------------------|
| <b>Scan number</b> | 7978      | <b>Raw file</b>  | 20100917-KD-Batch5-Prt-OGE-Mock-Frac17 |
| <b>Method</b>      | ITMS; CID | <b>Genenames</b> | DDX3Y                                  |

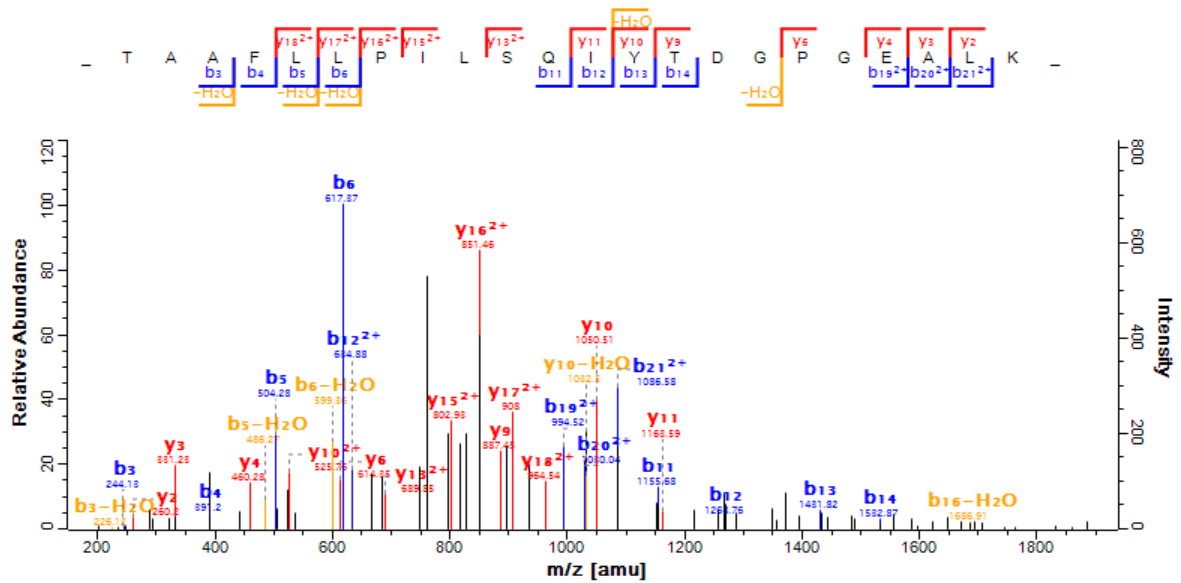

**Protein Group ID:** 227

**Protein Accession Numbers:** P04049-2; P04049; B4E0X2; H7C155; B4E1N6

**Gene Names:** RAF1

**Peptide Sequence:** PLFPQILSSIQLLQHS LPK

**Total Number of Spectra:** 1

**Number of Replicates (out of 10):** 1

**Best Match Score:** 86.367

**Best Match Posterior Error Probability:** 0.00046082

**Best Match Spectrum:**

**Scan number** 8308      **Raw file** 20100930-KD-Batch5-Prt-OGE-WT-Frac20  
**Method** ITMS; CID      **Genenames** RAF1

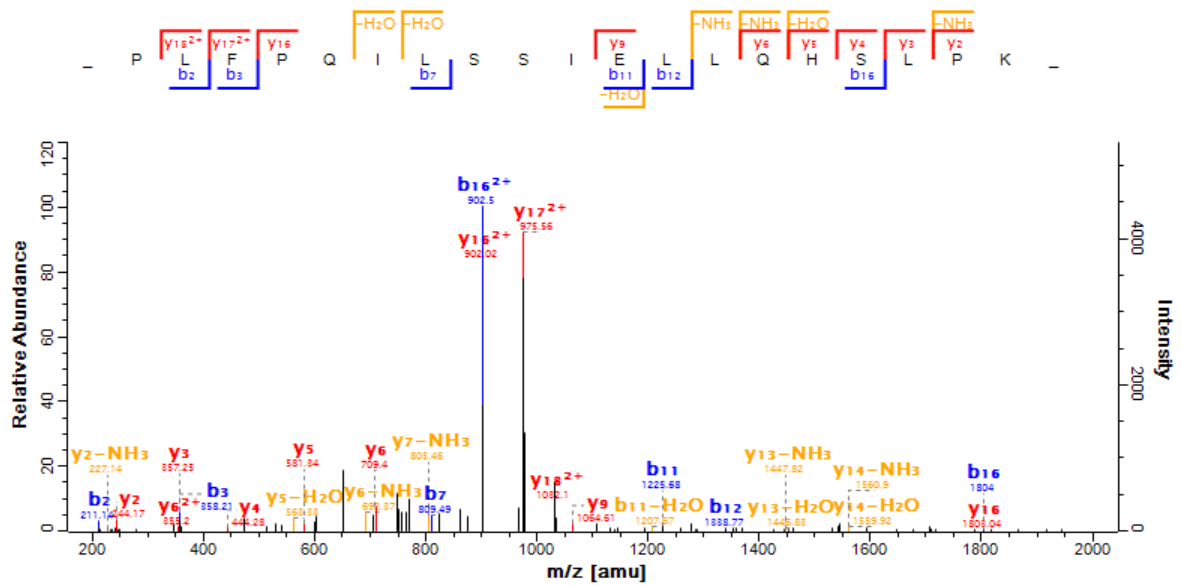

**Protein Group ID:** 233

**Protein Accession Numbers:** B4E2P2; Q9UNL2; C9JA28

**Gene Names:** SSR3

**Peptide Sequence:** QQSEEDLLLQDFSR

**Total Number of Spectra:** 1

**Number of Replicates (out of 10):** 1

**Best Match Score:** 81.448

**Best Match Posterior Error Probability:** 0.0014743

**Best Match Spectrum:**

**Scan number** 3726      **Raw file** Prt-OGE-Batch3-WT-Frac1  
**Method** ITMS; CID      **Genenames** SSR3

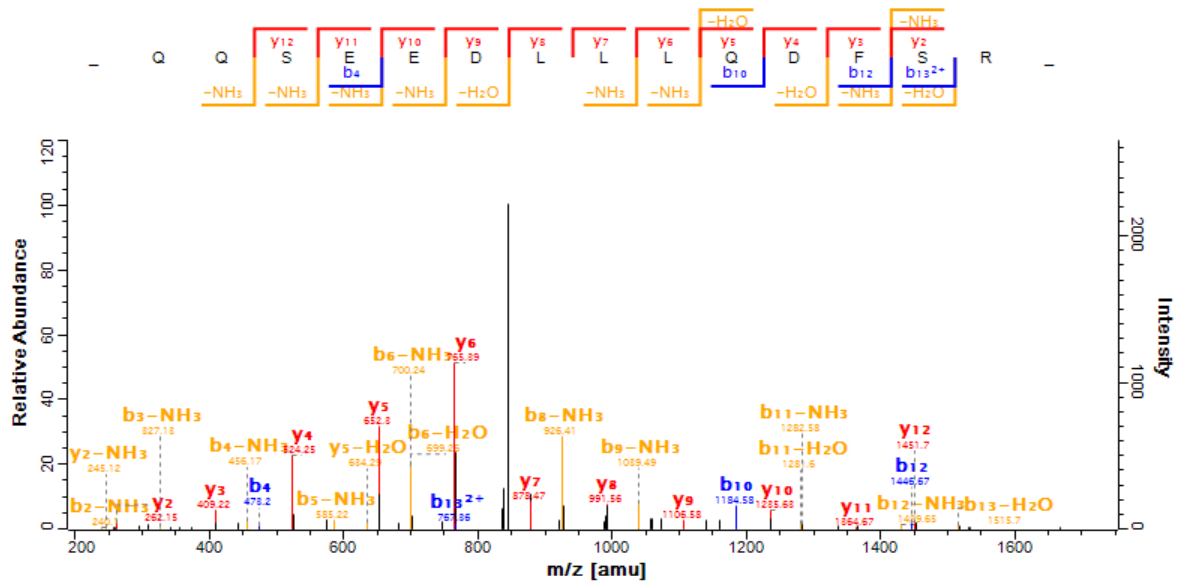

**Protein Group ID:** 237

**Protein Accession Numbers:** Q8N6R0; B4E2X3; Q8N6R0-4; Q8N6R0-3; Q8N6R0-1

**Gene Names:** METTL13

**Peptide Sequence:** VMELAPAGMPTQQQVLPFSLVGGDVGVR

**Total Number of Spectra:** 2

**Number of Replicates (out of 10):** 2

**Best Match Score:** 55.469

**Best Match Posterior Error Probability:** 0.00077373

**Best Match Spectrum:**

|                    |           |                  |                                        |
|--------------------|-----------|------------------|----------------------------------------|
| <b>Scan number</b> | 6342      | <b>Raw file</b>  | 20100914-KD-Batch4-Prt-OGE-Mock-Frac14 |
| <b>Method</b>      | ITMS; CID | <b>Genenames</b> | METTL13                                |

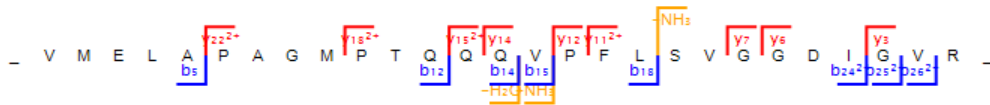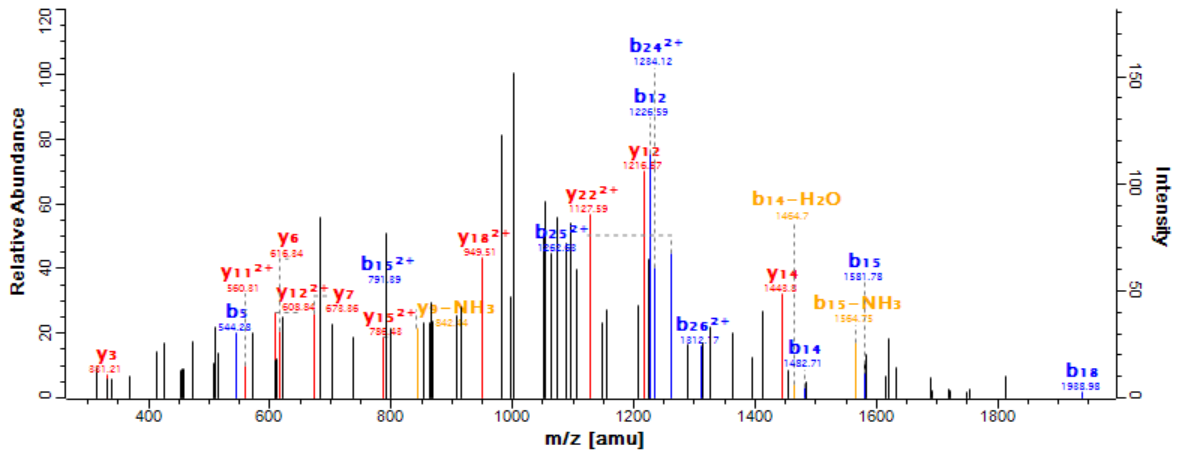



**Protein Group ID:** 243

**Protein Accession Numbers:** B5MBZ0; Q9HC35; B5MCW9; F2Z2B5

**Gene Names:** EML4

**Peptide Sequence:** YSAHSSHTVNSFTHNSHLISTGGK

**Total Number of Spectra:** 1

**Number of Replicates (out of 10):** 1

**Best Match Score:** 84.946

**Best Match Posterior Error Probability:** 2.17E-06

**Best Match Spectrum:**

|                    |           |                  |                            |
|--------------------|-----------|------------------|----------------------------|
| <b>Scan number</b> | 2698      | <b>Raw file</b>  | Prt-OGE-Batch2-Mock-Frac14 |
| <b>Method</b>      | ITMS; CID | <b>Genenames</b> | EML4                       |

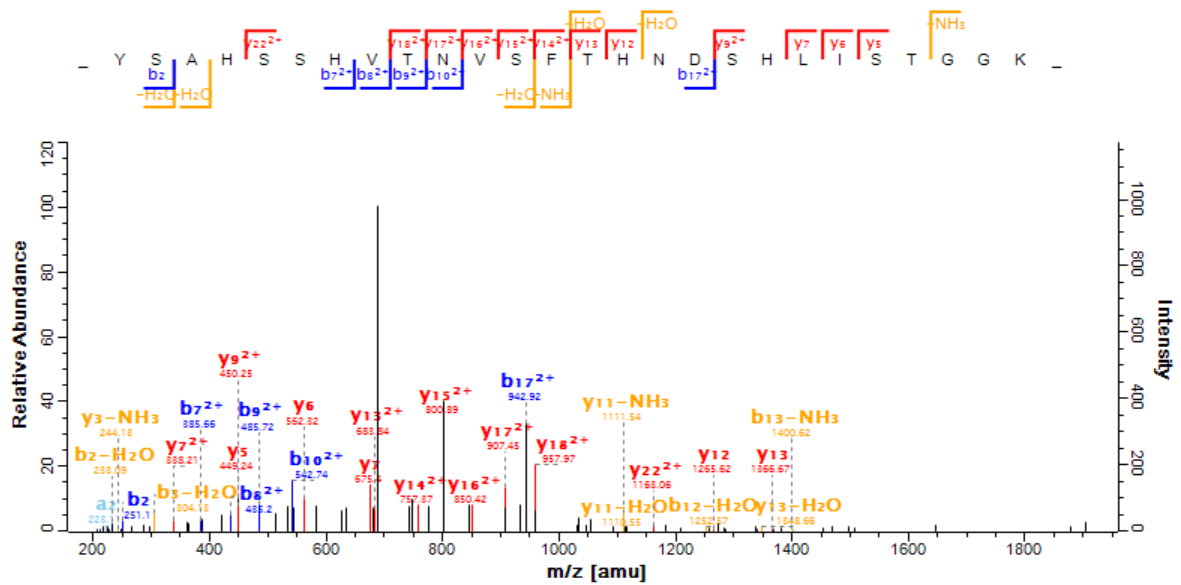

**Protein Group ID:** 246

**Protein Accession Numbers:** B5MCC9; B5MCP5; Q99674

**Gene Names:** CGREF1

**Peptide Sequence:** RESLDPVQEPGGQAEDGDVPGPR

**Total Number of Spectra:** 1

**Number of Replicates (out of 10):** 1

**Best Match Score:** 92.01

**Best Match Posterior Error Probability:** 8.93E-06

**Best Match Spectrum:**

|                    |           |                  |                            |
|--------------------|-----------|------------------|----------------------------|
| <b>Scan number</b> | 2606      | <b>Raw file</b>  | Prt-OGE-Batch3--Mock-Frac3 |
| <b>Method</b>      | ITMS; CID | <b>Genenames</b> | CGREF1                     |

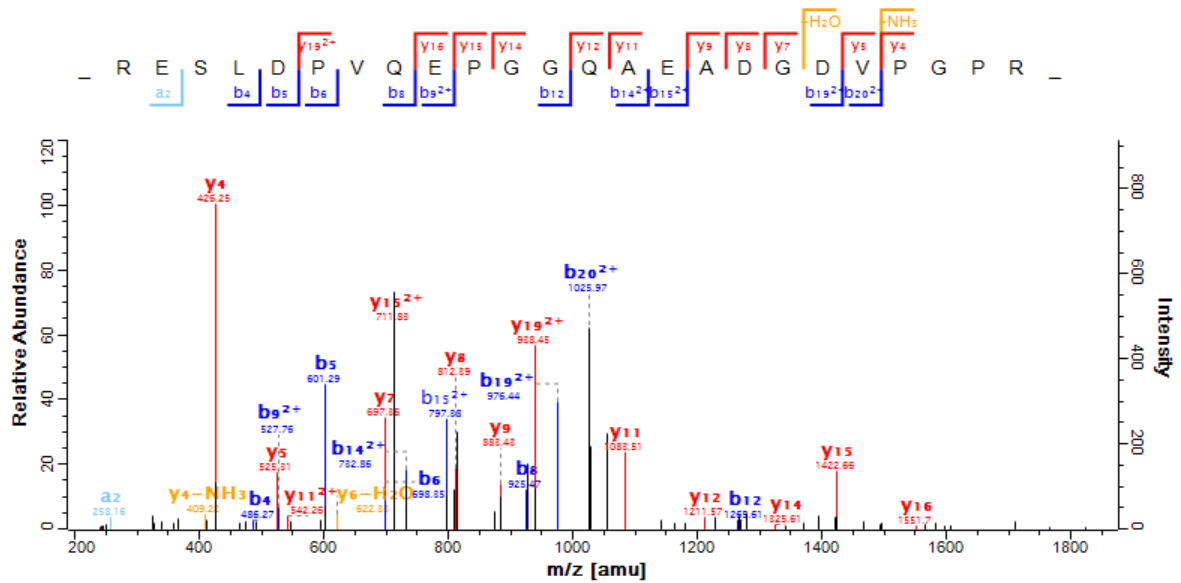

**Protein Group ID:** 249  
**Protein Accession Numbers:** Q2NKX8; B5MDQ0  
**Gene Names:** ERCC6L  
**Peptide Sequence:** SLINMVLVDHVEDMEER  
**Total Number of Spectra:** 9  
**Number of Replicates (out of 10):** 6  
**Best Match Score:** 110.98  
**Best Match Posterior Error Probability:** 0.00012824  
**Best Match Spectrum:**

**Scan number** 6519      **Raw file** 20100927-KD-Batch4-Prt-OGE-WT-Frac4  
**Method** ITMS; CID      **Genenames** ERCC6L

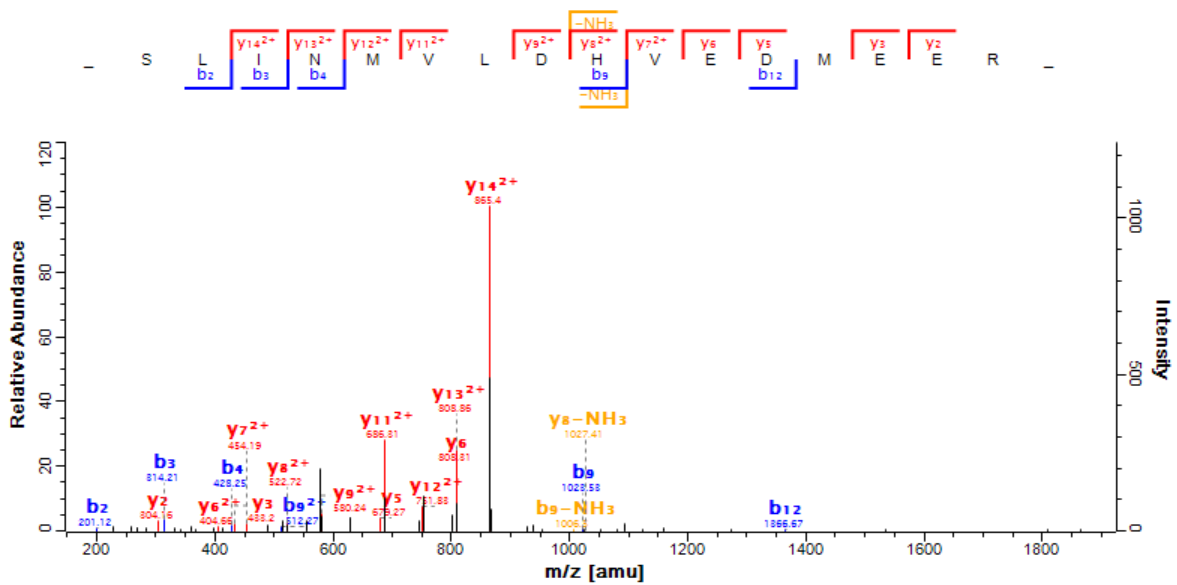

**Protein Group ID:** 252

**Protein Accession Numbers:** D6W592; Q8WVV9; Q8WVV9-4; B7WPG3; Q5JB52; C9IYN3; Q8WVV9-2; Q8WVV9-3

**Gene Names:** HNRPLL

**Peptide Sequence:** LKTEEGEIDYSAEEGENR

**Total Number of Spectra:** 4

**Number of Replicates (out of 10):** 4

**Best Match Score:** 137.81

**Best Match Posterior Error Probability:** 1.72E-05

**Best Match Spectrum:**

|                    |           |                  |                          |
|--------------------|-----------|------------------|--------------------------|
| <b>Scan number</b> | 1386      | <b>Raw file</b>  | Prt-OGE-Batch3-WT-Frac17 |
| <b>Method</b>      | ITMS: CID | <b>Genenames</b> | HNRPLL                   |

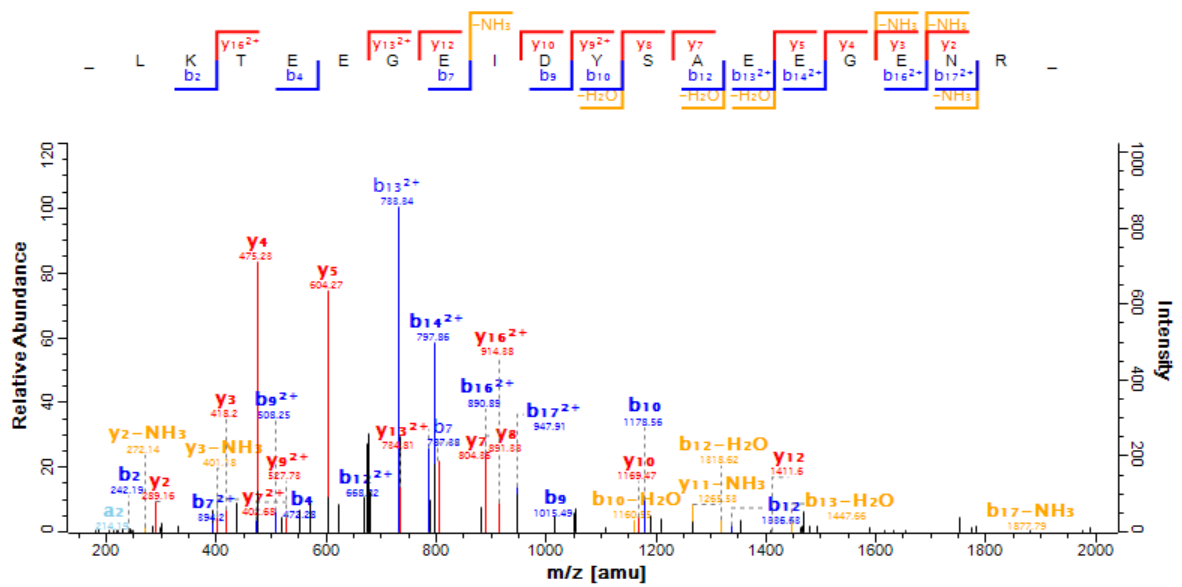

**Protein Group ID:** 253

**Protein Accession Numbers:** P40123; E9PDI2; B7Z1C4; B7Z385

**Gene Names:** CAP2

**Peptide Sequence:** SALFAQLNQGEAITK

**Total Number of Spectra:** 2

**Number of Replicates (out of 10):** 2

**Best Match Score:** 222.45

**Best Match Posterior Error Probability:** 4.79E-49

**Best Match Spectrum:**

**Scan number** 4205      **Raw file** 20100927-KD-Batch4-Prt-OGE-WT-Frac12  
**Method** ITMS; CID      **Genenames** CAP2

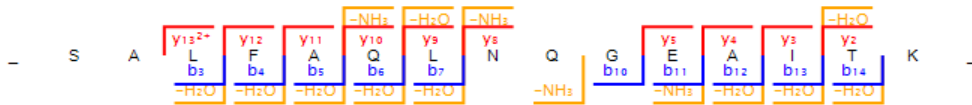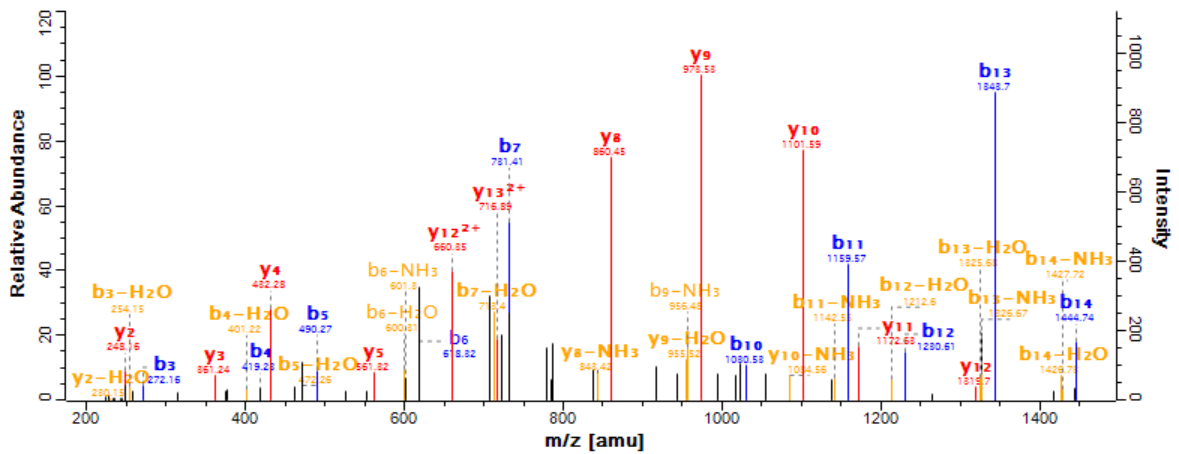

**Protein Group ID:** 254  
**Protein Accession Numbers:** B7Z1E5; Q92600  
**Gene Names:** RQCD1  
**Peptide Sequence:** NLQEGQVTDP  
**Total Number of Spectra:** 2  
**Number of Replicates (out of 10):** 2  
**Best Match Score:** 94.191  
**Best Match Posterior Error Probability:** 0.00056414  
**Best Match Spectrum:**

**Scan number** 1270      **Raw file** 20100930-KD-Batch5-Prt-OGE-WT-Frac18  
**Method** ITMS; CID      **Genenames** RQCD1

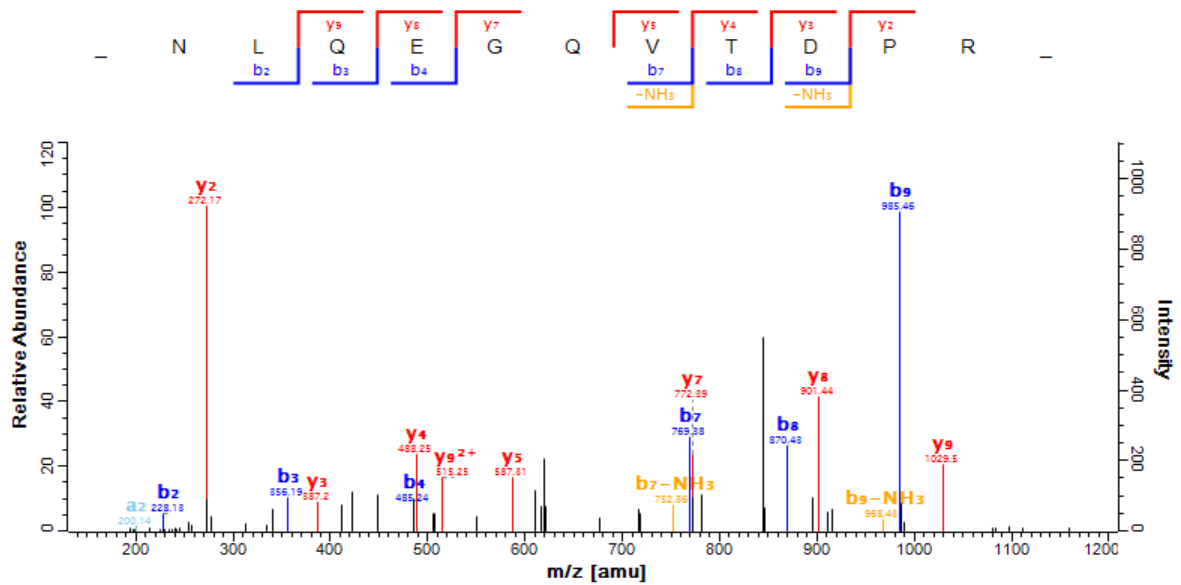

**Protein Group ID:** 256

**Protein Accession Numbers:** Q8WZA2; E7EVE5; E9PB94; Q8WZA2-3; B7Z283; B7Z3T6; B7Z278; Q8WZA2-2

**Gene Names:** RAPGEF4

**Peptide Sequence:** ASNQNSQPQQK

**Total Number of Spectra:** 1

**Number of Replicates (out of 10):** 1

**Best Match Score:** 41.242

**Best Match Posterior Error Probability:** 0.049718

**Best Match Spectrum:**

Scan number 810 Raw file 20100927-KD-Batch4-Prt-OGE-WT-Frac3  
Method ITMS; CID Genenames RAPGEF4

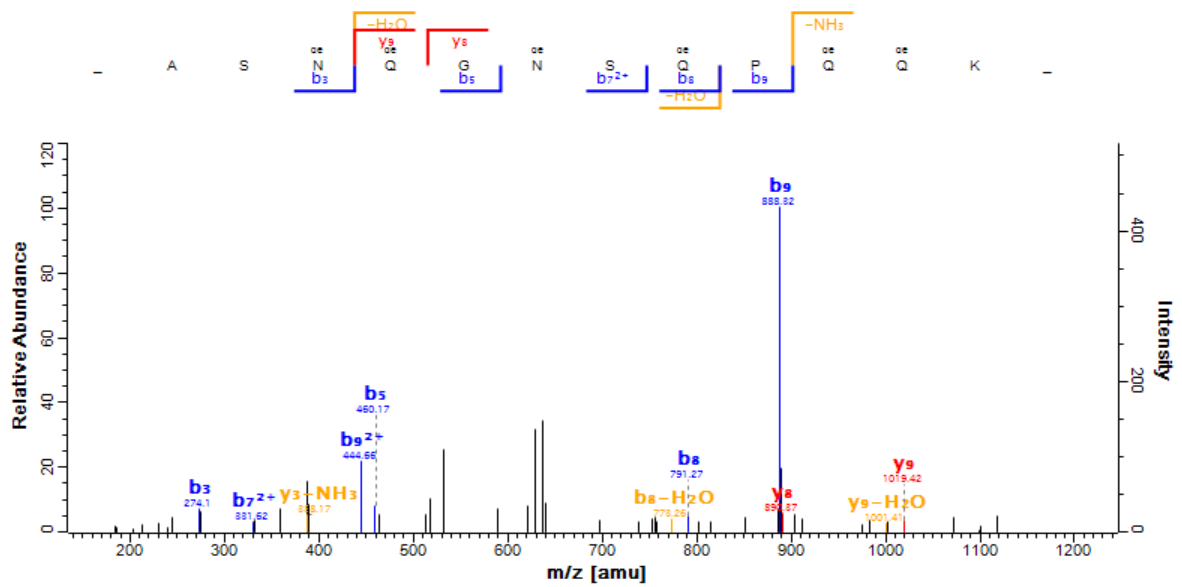

**Protein Group ID:** 258

**Protein Accession Numbers:** Q14746; Q14746-2; B7Z2Y2; F5H1E5; B7Z7N2

**Gene Names:** COG2

**Peptide Sequence:** SFSALAELVAAK

**Total Number of Spectra:** 1

**Number of Replicates (out of 10):** 1

**Best Match Score:** 135.02

**Best Match Posterior Error Probability:** 3.27E-05

**Best Match Spectrum:**

**Scan number** 5064      **Raw file** Prt-OGE-Batch2-WT-Frac13  
**Method** ITMS; CID      **Genenames** COG2

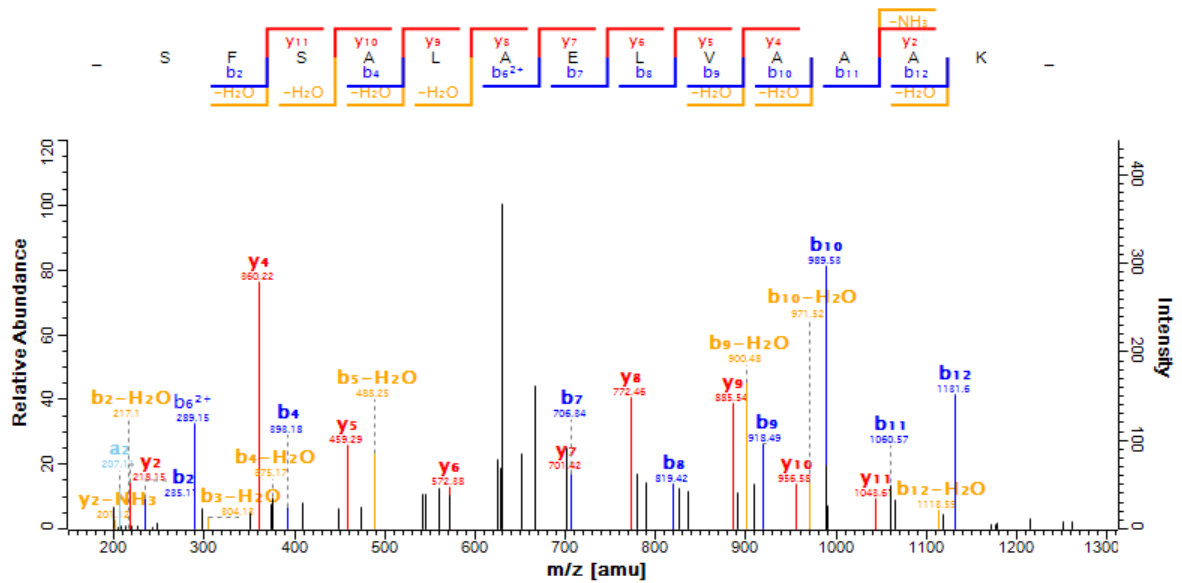



**Protein Group ID:** 259

**Protein Accession Numbers:** Q14964; P20340; P20340-2; Q9NRW1; H0YGL6; B7Z337; F5H668; H7BYW1; F5GZB1; J3KR73; C9JU14; F5GXN4; C9JB90

**Gene Names:** RAB39A;RAB6A;RAB6B

**Peptide Sequence:** LQLWDTAGQER

**Total Number of Spectra:** 26

**Number of Replicates (out of 10):** 8

**Best Match Score:** 178.71

**Best Match Posterior Error Probability:** 8.12E-11

**Best Match Spectrum:**

**Scan number** 3216      **Raw file** 20100927-KD-Batch4-Prt-OGE-WT-Frac13  
**Method** ITMS: CID      **Genenames** RAB39A;RAB6A;RAB6B

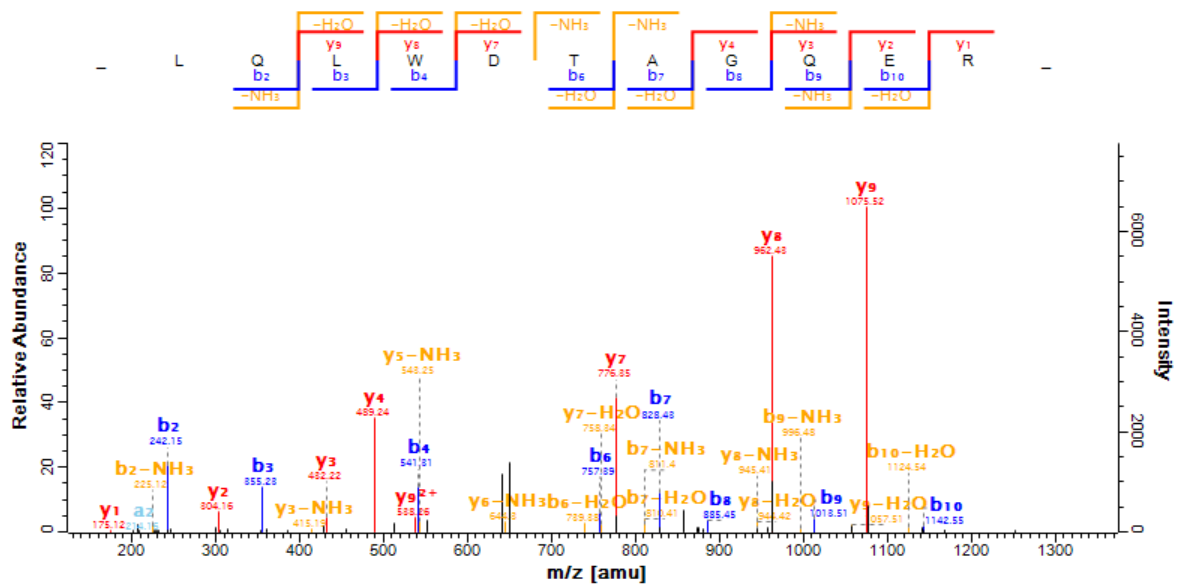

**Protein Group ID:** 260

**Protein Accession Numbers:** Q9NPH2; G5E9U0; Q9NPH2-2; G3V1R9; B7Z3K3; J3QRY8; J3KRC6

**Gene Names:** ISYNA1

**Peptide Sequence:** SVLVDFLIGSGLK

**Total Number of Spectra:** 6

**Number of Replicates (out of 10):** 6

**Best Match Score:** 150.21

**Best Match Posterior Error Probability:** 1.01E-05

**Best Match Spectrum:**

|                    |           |                  |                           |
|--------------------|-----------|------------------|---------------------------|
| <b>Scan number</b> | 7277      | <b>Raw file</b>  | Prt-OGE-Batch2-Mock-Frac9 |
| <b>Method</b>      | ITMS; CID | <b>Genenames</b> | ISYNA1                    |

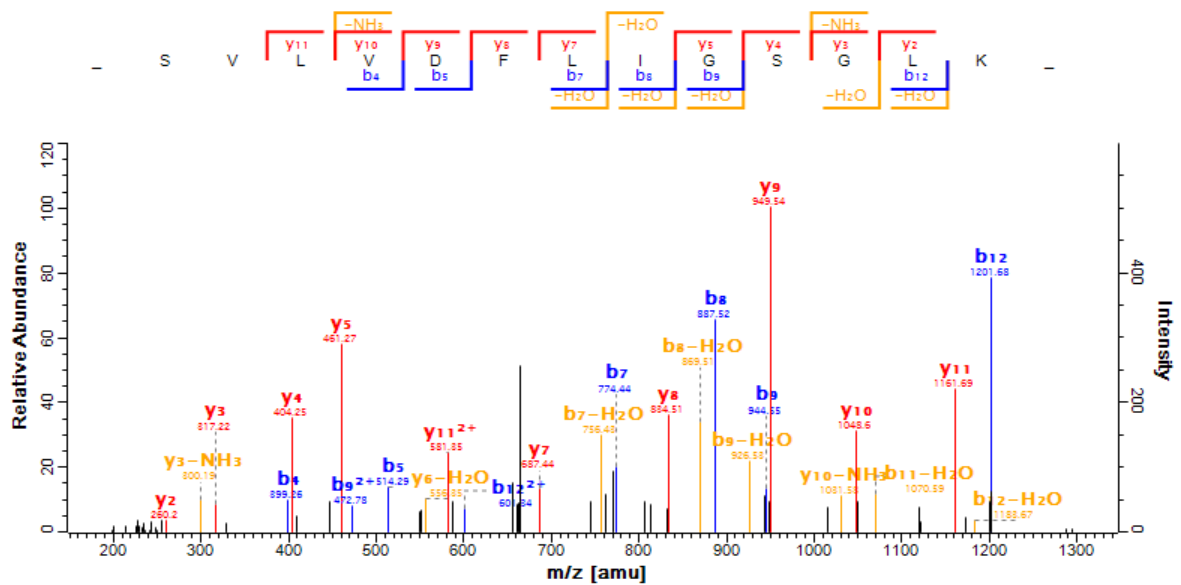

**Protein Group ID:** 268

**Protein Accession Numbers:** O00115; B7Z4K6; K7ENE5

**Gene Names:** DNASE2

**Peptide Sequence:** ALINSPEGAVGR

**Total Number of Spectra:** 3

**Number of Replicates (out of 10):** 2

**Best Match Score:** 106.67

**Best Match Posterior Error Probability:** 0.00022814

**Best Match Spectrum:**

**Scan number** 2313      **Raw file** 20100914-KD-Batch4-Prt-OGE-Mock-Frac5  
**Method** ITMS; CID      **Genenames** DNASE2

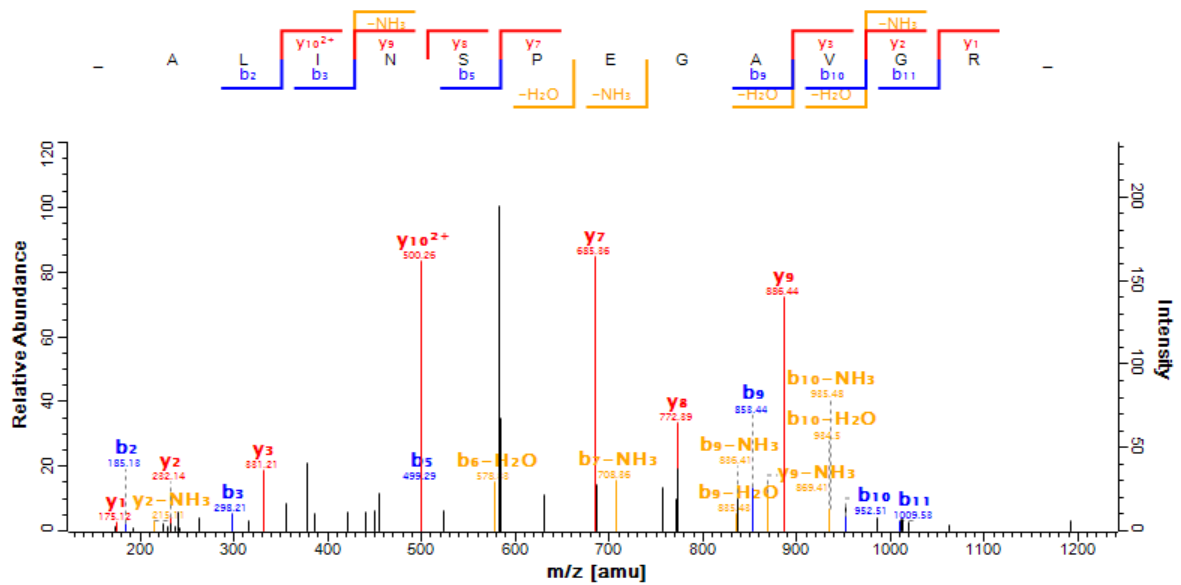

**Protein Group ID:** 269

**Protein Accession Numbers:** B7Z4W5; Q16773; Q16773-2

**Gene Names:** CCBL1

**Peptide Sequence:** SLQSVGLKPIIPQGSYFLITDISDFK

**Total Number of Spectra:** 1

**Number of Replicates (out of 10):** 1

**Best Match Score:** 100.94

**Best Match Posterior Error Probability:** 2.86E-09

**Best Match Spectrum:**

**Scan number** 7499      **Raw file** 20100930-KD-Batch5-Prt-OGE-WT-Frac13  
**Method** ITMS; CID      **Genenames** CCBL1

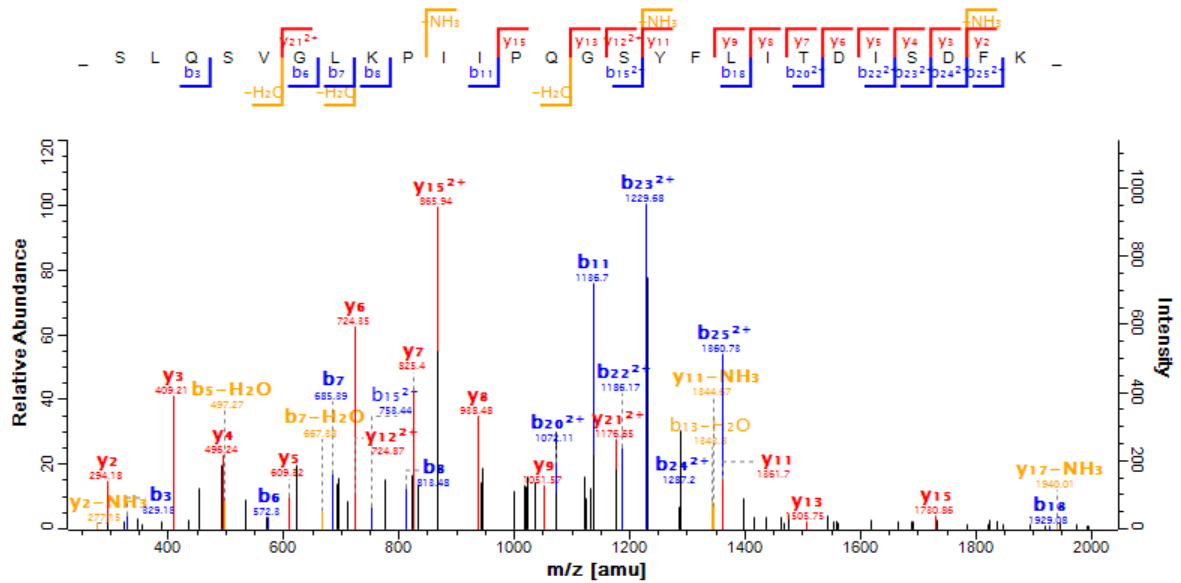

**Protein Group ID:** 271  
**Protein Accession Numbers:** P31749; B7Z5R1  
**Gene Names:** AKT1  
**Peptide Sequence:** FYGAEIVSALDYLHSEK  
**Total Number of Spectra:** 1  
**Number of Replicates (out of 10):** 1  
**Best Match Score:** 125.53  
**Best Match Posterior Error Probability:** 7.27E-05  
**Best Match Spectrum:**

**Scan number** 5124      **Raw file** Prt-OGE-Batch3-WT-Frac10  
**Method** ITMS; CID      **Genenames** AKT1

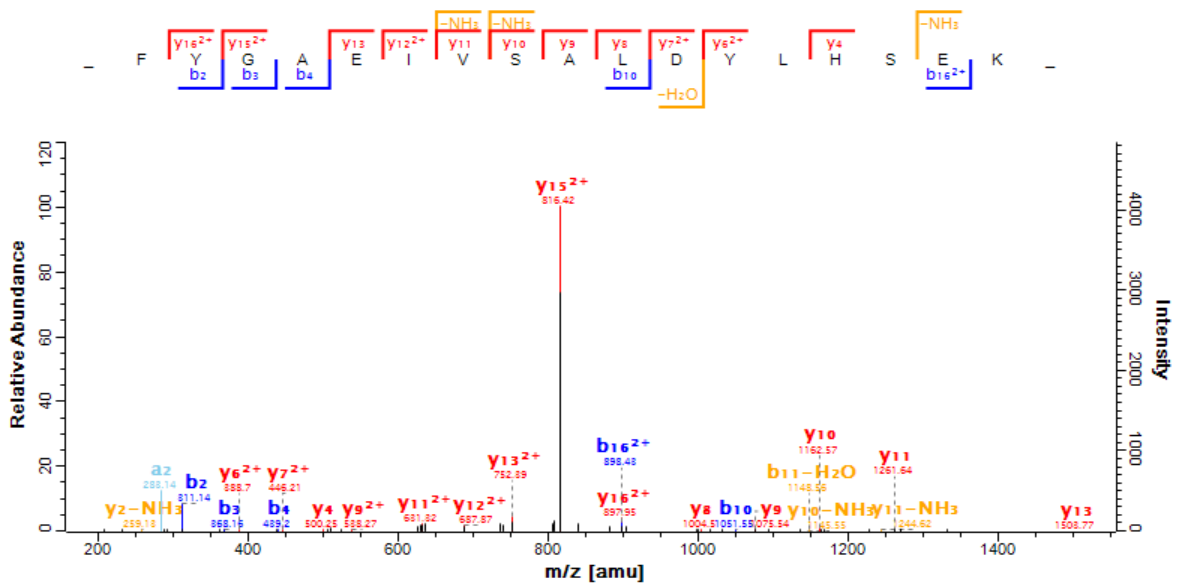

**Protein Group ID:** 272

**Protein Accession Numbers:** Q12979; Q12979-2; F5H8B3; B7Z683; I3L1U8

**Gene Names:** ABR

**Peptide Sequence:** ISQNFLSSINEDIDPR

**Total Number of Spectra:** 1

**Number of Replicates (out of 10):** 1

**Best Match Score:** 97.579

**Best Match Posterior Error Probability:** 0.00022337

**Best Match Spectrum:**

|                    |           |                  |                          |
|--------------------|-----------|------------------|--------------------------|
| <b>Scan number</b> | 4476      | <b>Raw file</b>  | Prt-OGE-Batch2-WT-Frac14 |
| <b>Method</b>      | ITMS; CID | <b>Genenames</b> | ABR                      |

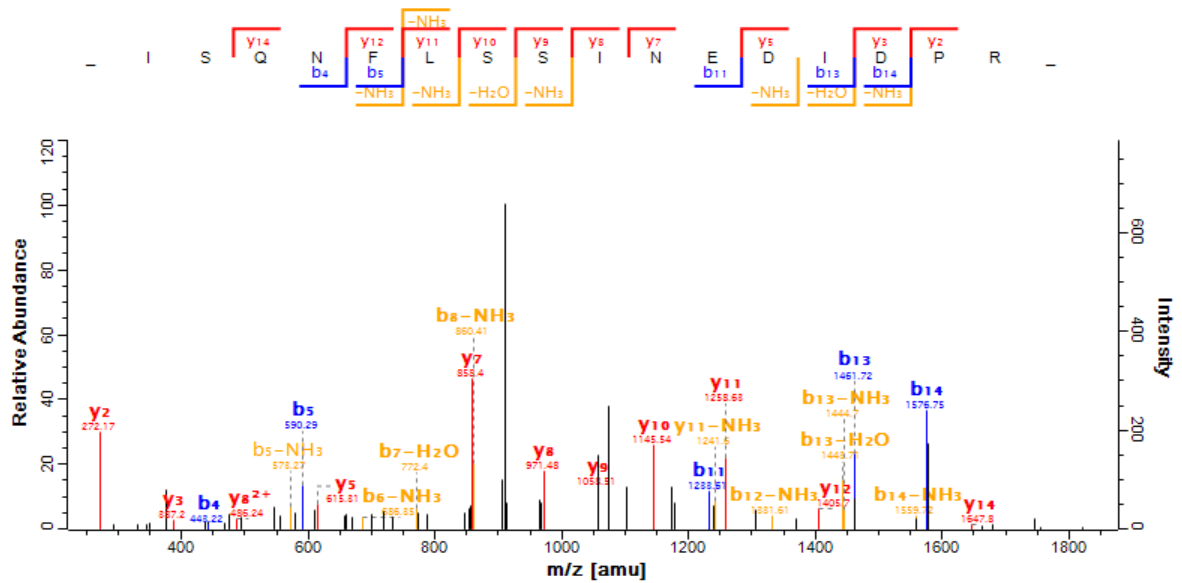

**Protein Group ID:** 273

**Protein Accession Numbers:** O15260; Q5T8U7; Q5T8U5; O15260-2; B7Z6A4

**Gene Names:** SURF4

**Peptide Sequence:** GQNLMGTAE D F A Q F L R

**Total Number of Spectra:** 18

**Number of Replicates (out of 10):** 7

**Best Match Score:** 192.16

**Best Match Posterior Error Probability:** 7.15E-32

**Best Match Spectrum:**

**Scan number** 7466      **Raw file** 20100927-KD-Batch4-Prt-OGE-WT-Frac9  
**Method** ITMS; CID      **Genenames** SURF4

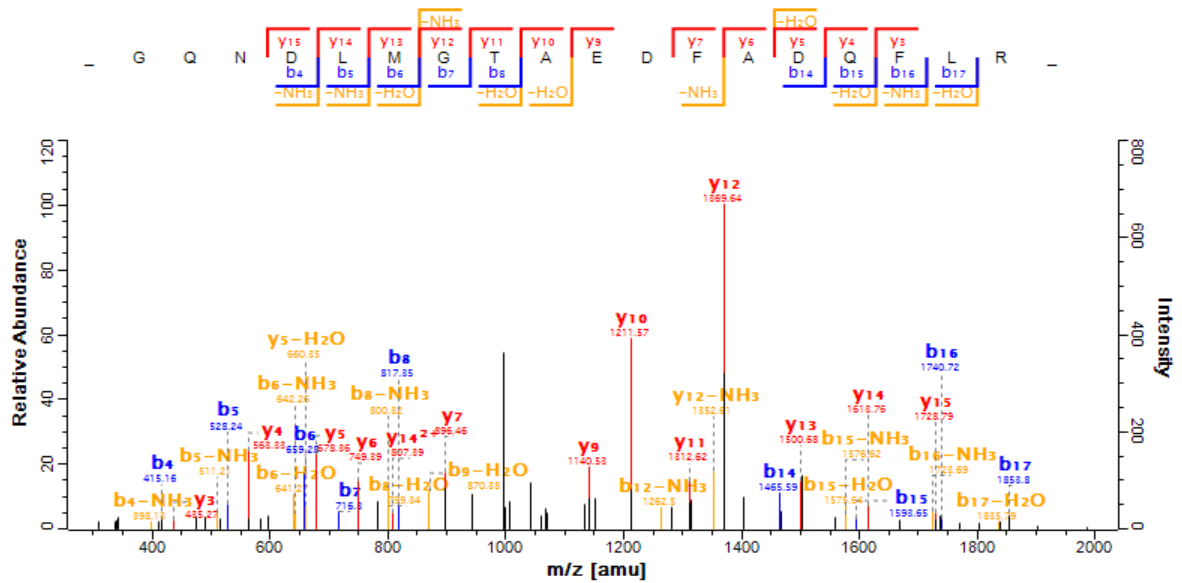

**Protein Group ID:** 277

**Protein Accession Numbers:** B7Z713; D6RCM8; O95379; O95379-2; O95379-3; E5RIJ3

**Gene Names:** TNFAIP8

**Peptide Sequence:** SIATTLIDDTSSSEVLDELYR

**Total Number of Spectra:** 1

**Number of Replicates (out of 10):** 1

**Best Match Score:** 87.388

**Best Match Posterior Error Probability:** 0.00023534

**Best Match Spectrum:**

|                    |           |                  |                            |
|--------------------|-----------|------------------|----------------------------|
| <b>Scan number</b> | 7966      | <b>Raw file</b>  | Prt-OGE-Batch2-Mock-Frac19 |
| <b>Method</b>      | ITMS; CID | <b>Genenames</b> | TNFAIP8                    |

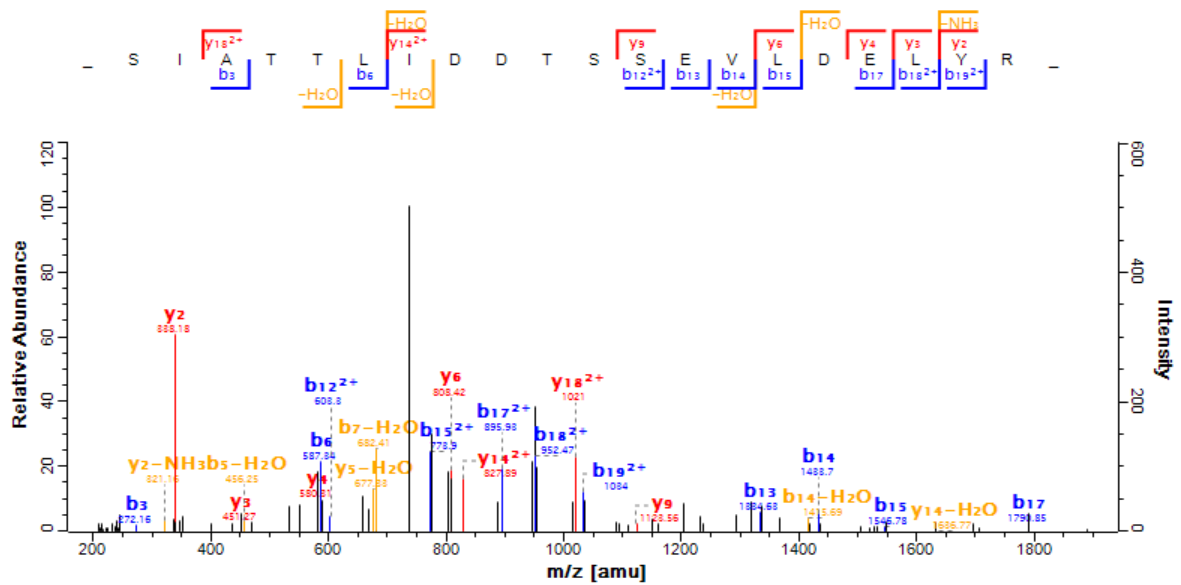



**Protein Group ID:** 279  
**Protein Accession Numbers:** O95900; B7Z7G5  
**Gene Names:** TRUB2  
**Peptide Sequence:** DGFFTLDSALLR  
**Total Number of Spectra:** 1  
**Number of Replicates (out of 10):** 1  
**Best Match Score:** 90.614  
**Best Match Posterior Error Probability:** 0.00080802  
**Best Match Spectrum:**

**Scan number** 5829      **Raw file** 20100917-KD-Batch5-Prt-OGE-Mock-Frac21  
**Method** ITMS; CID      **Genenames** TRUB2

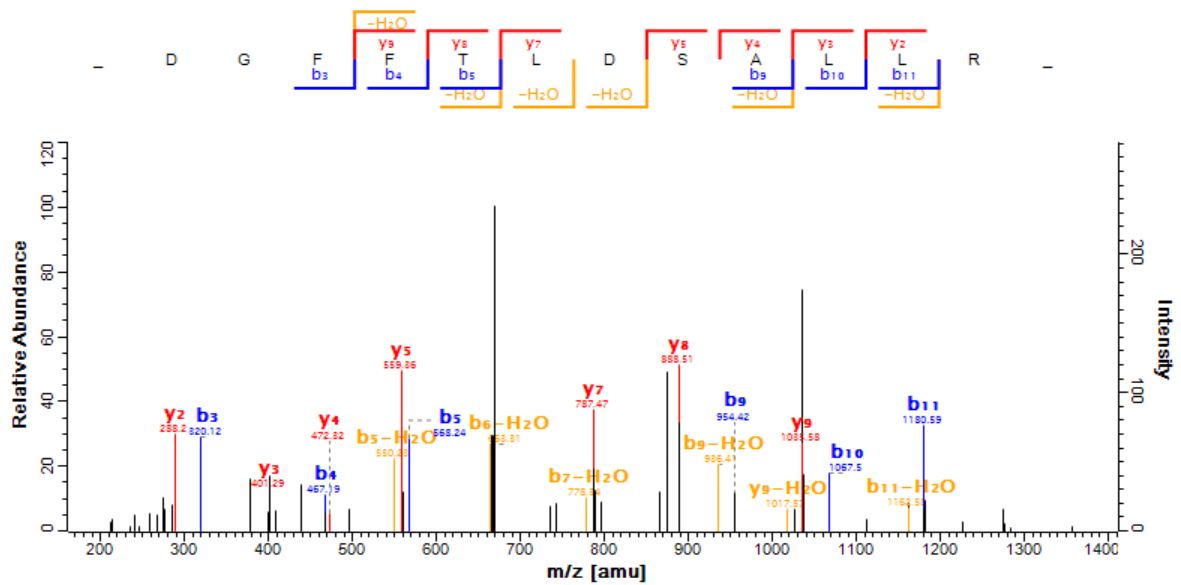

**Protein Group ID:** 282  
**Protein Accession Numbers:** B7Z7U4  
**Gene Names:** NTRK3  
**Peptide Sequence:** ELYTGLQK  
**Total Number of Spectra:** 9  
**Number of Replicates (out of 10):** 7  
**Best Match Score:** 110.81  
**Best Match Posterior Error Probability:** 0.0015946  
**Best Match Spectrum:**

|                    |           |                  |                                       |
|--------------------|-----------|------------------|---------------------------------------|
| <b>Scan number</b> | 2296      | <b>Raw file</b>  | 20100917-KD-Batch5-Prt-OGE-Mock-Frac7 |
| <b>Method</b>      | ITMS; CID | <b>Genenames</b> | NTRK3                                 |

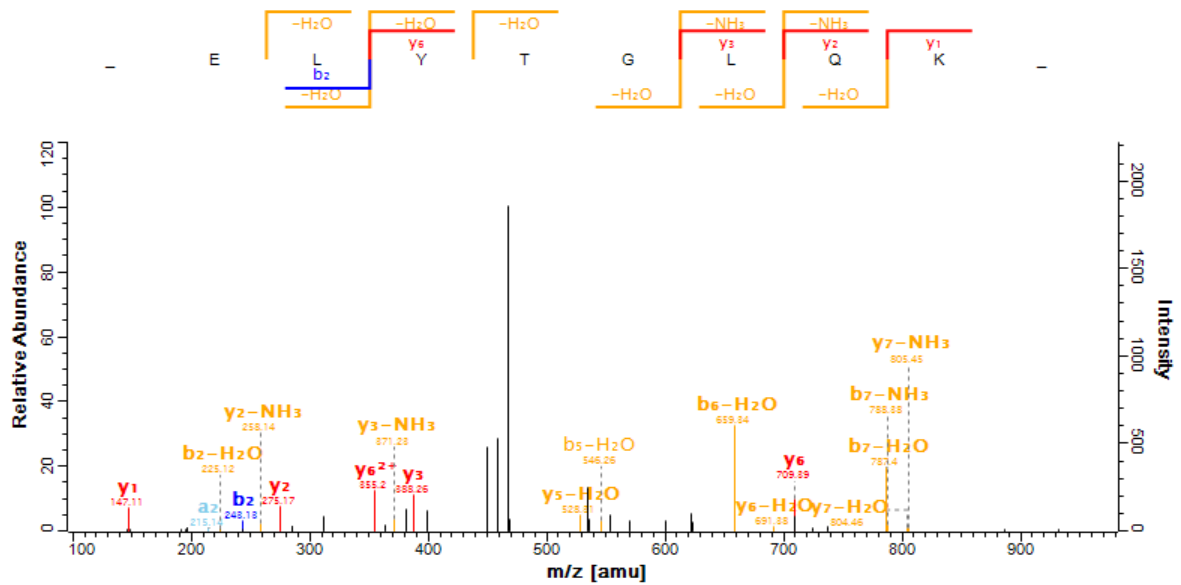

**Protein Group ID:** 283

**Protein Accession Numbers:** Q8NHH9; Q8NHH9-2; Q8NHH9-4; B7Z7X8; H7C3A2; C9JC25

**Gene Names:** ATL2

**Peptide Sequence:** SFLLDFMLR

**Total Number of Spectra:** 1

**Number of Replicates (out of 10):** 1

**Best Match Score:** 113.22

**Best Match Posterior Error Probability:** 0.00038882

**Best Match Spectrum:**

Scan number 7108 Raw file 20100927-KD-Batch4-Prt-OGE-WT-Frac11  
Method ITMS: CID Genenames ATL2

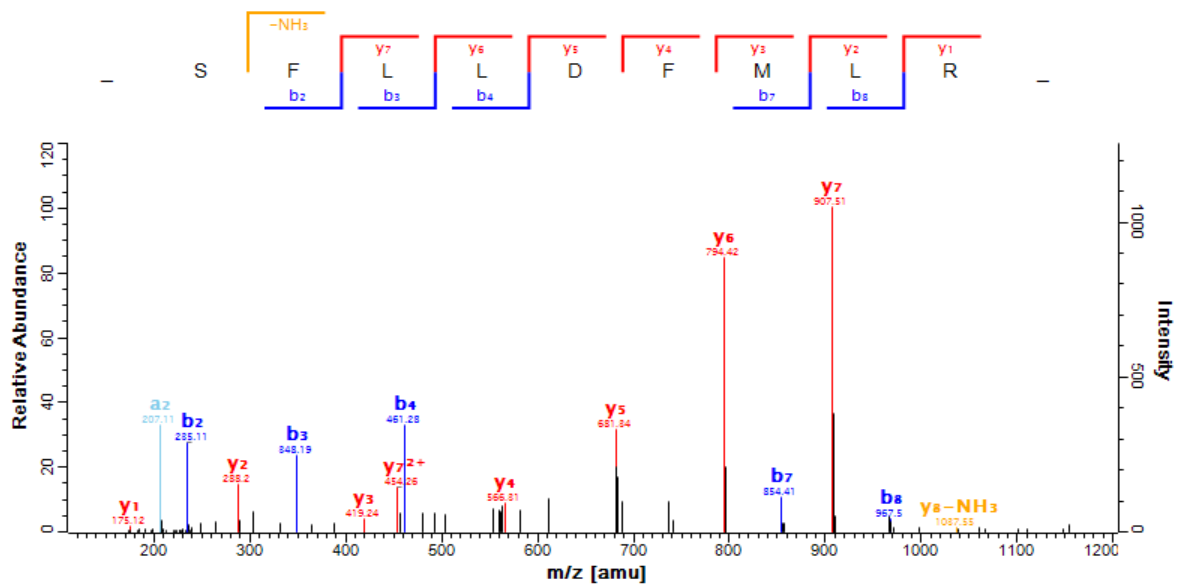

**Protein Group ID:** 286

**Protein Accession Numbers:** P62820; B7Z8M7; E7END7; P62820-2; E7ETK2; P62820-3

**Gene Names:** RAB1A

**Peptide Sequence:** NATNVEQSFMTMAAEIK

**Total Number of Spectra:** 16

**Number of Replicates (out of 10):** 6

**Best Match Score:** 192.16

**Best Match Posterior Error Probability:** 9.39E-31

**Best Match Spectrum:**

**Scan number** 6645      **Raw file** Prt-OGE-Batch2-Mock-Frac11  
**Method** ITMS; CID      **Genenames** RAB1A

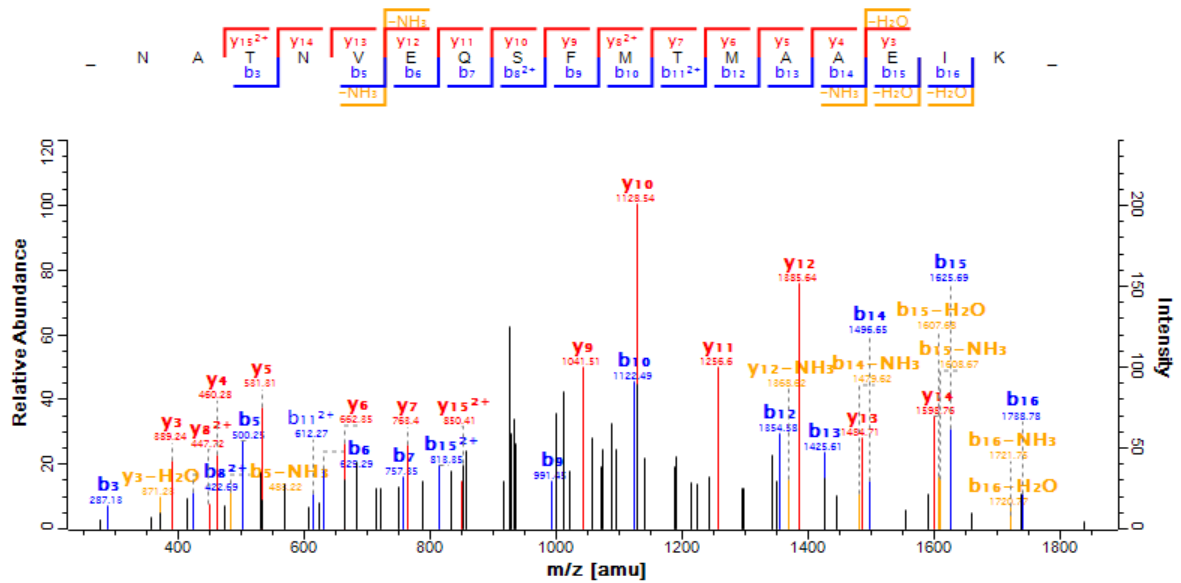

**Protein Group ID:** 287

**Protein Accession Numbers:** Q4G0N4; Q4G0N4-2; B7Z8V7; Q4G0N4-3

**Gene Names:** NADKD1

**Peptide Sequence:** VATQAVEDVLNIAK

**Total Number of Spectra:** 1

**Number of Replicates (out of 10):** 1

**Best Match Score:** 81.703

**Best Match Posterior Error Probability:** 0.0014407

**Best Match Spectrum:**

**Scan number** 5642      **Raw file** Prt-OGE-Batch2-Mock-Frac15  
**Method** ITMS; CID      **Genenames** NADKD1

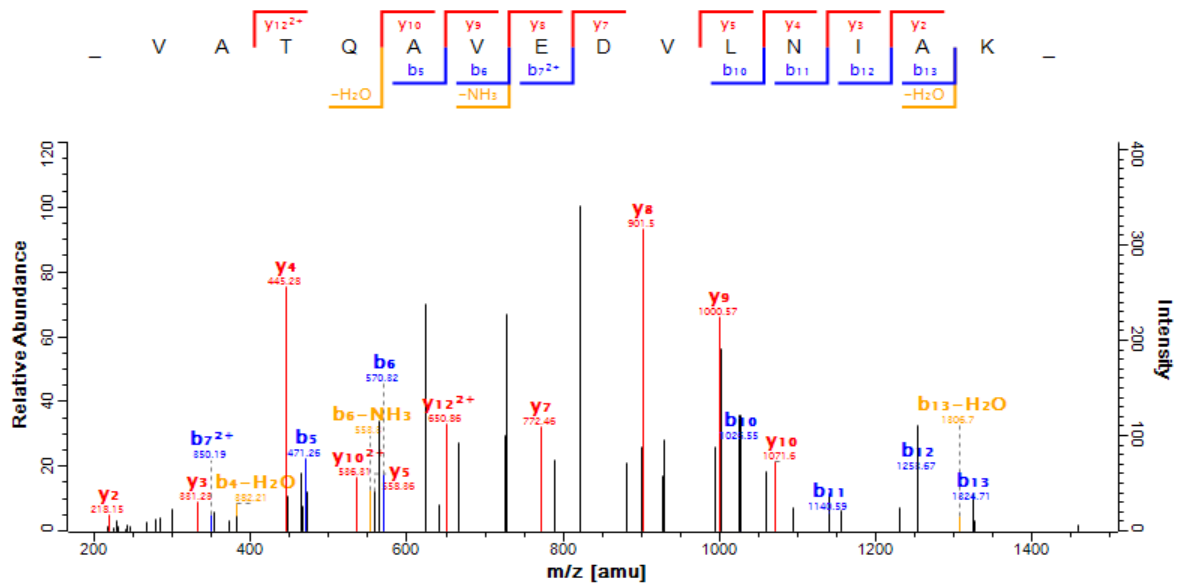

**Protein Group ID:** 292

**Protein Accession Numbers:** P28332-2; P28332; E9PBI1; D6RH17; B7ZAL1

**Gene Names:** ADH6

**Peptide Sequence:** IIGVDVNKEK

**Total Number of Spectra:** 5

**Number of Replicates (out of 10):** 4

**Best Match Score:** 123.35

**Best Match Posterior Error Probability:** 0.00038

**Best Match Spectrum:**

**Scan number** 1832      **Raw file** 20100914-KD-Batch4-Prt-OGE-Mock-Frac17  
**Method** ITMS; CID      **Genenames** ADH6

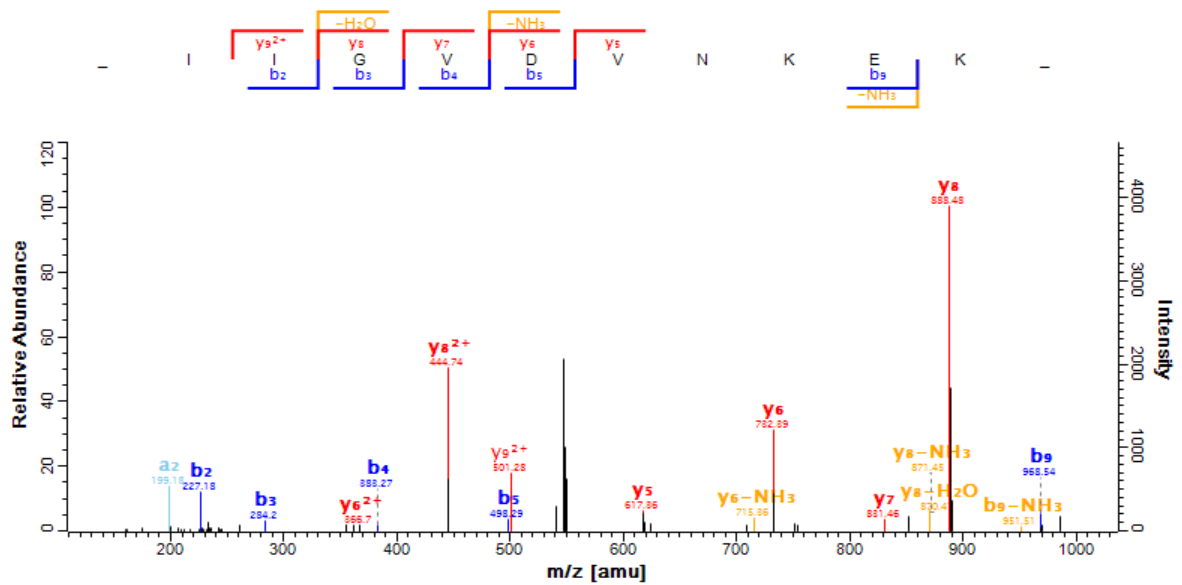

**Protein Group ID:** 293

**Protein Accession Numbers:** Q01415; Q01415-2; B7ZAX5

**Gene Names:** GALK2

**Peptide Sequence:** QSLFATKPGGGALVLEA

**Total Number of Spectra:** 1

**Number of Replicates (out of 10):** 1

**Best Match Score:** 101.78

**Best Match Posterior Error Probability:** 0.00071735

**Best Match Spectrum:**

**Scan number** 4949      **Raw file** Prt-OGE-Batch3-WT-Frac13  
**Method** ITMS; CID      **Genenames** GALK2

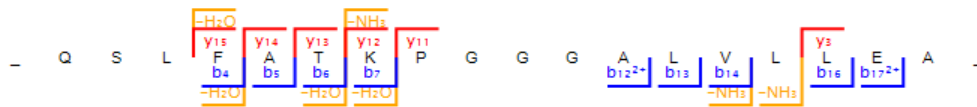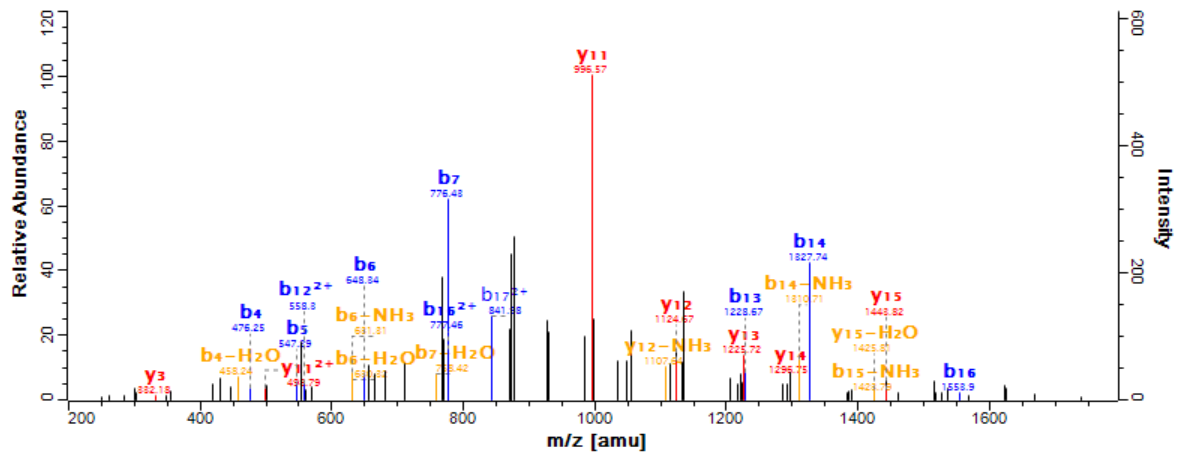

**Protein Group ID:** 297  
**Protein Accession Numbers:** B7ZKT7; Q9BQS8  
**Gene Names:** FYCO1  
**Peptide Sequence:** LQAQVVDLQAK  
**Total Number of Spectra:** 2  
**Number of Replicates (out of 10):** 2  
**Best Match Score:** 98.898  
**Best Match Posterior Error Probability:** 0.00028209  
**Best Match Spectrum:**

**Scan number** 3161      **Raw file** Prt-OGE-Batch2-Mock-Frac5  
**Method** ITMS; CID      **Genenames** FYCO1

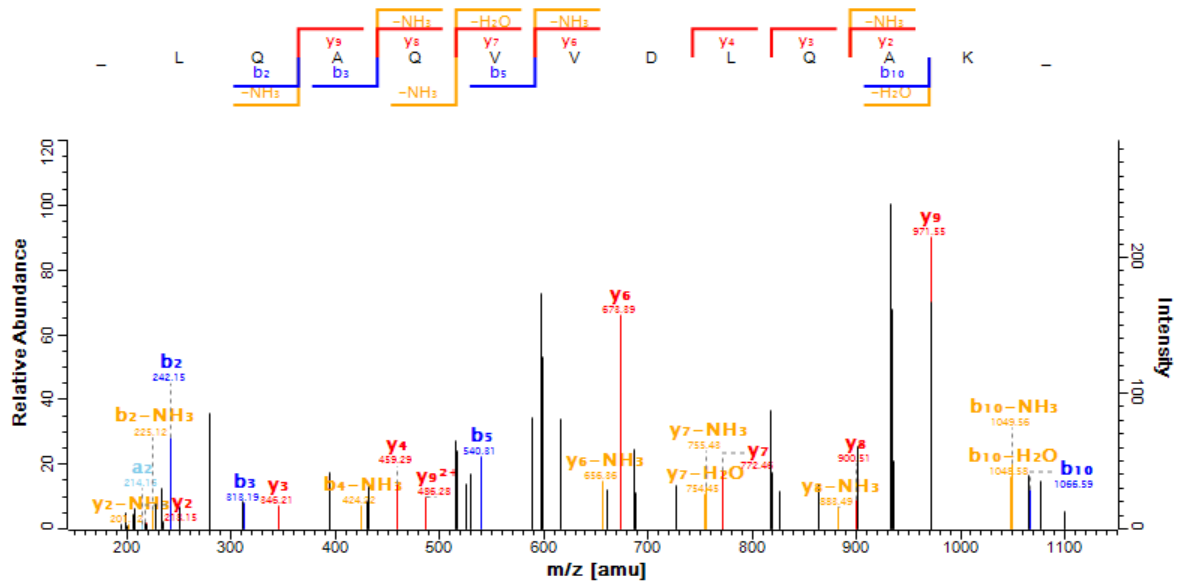



**Protein Group ID:** 299  
**Protein Accession Numbers:** Q6ZNL6; B7ZM68; Q6ZNL6-2  
**Gene Names:** FGD5  
**Peptide Sequence:** FSGSAFSSVFQSINPSTFK  
**Total Number of Spectra:** 4  
**Number of Replicates (out of 10):** 4  
**Best Match Score:** 111.78  
**Best Match Posterior Error Probability:** 3.53E-05  
**Best Match Spectrum:**

**Scan number** 2099 **Raw file** Prt-OGE-Batch2-WT-Frac22  
**Method** ITMS; CID **Genenames** FGD5

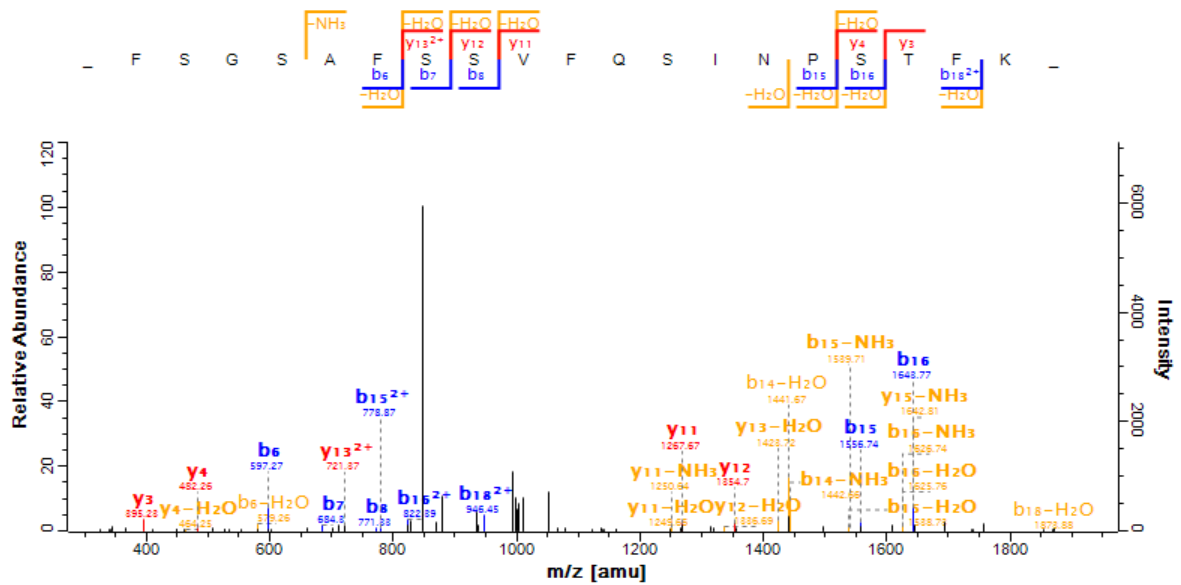

**Protein Group ID:** 301

**Protein Accession Numbers:** Q9UBP9; B8ZZ72; Q9UBP9-3; H7BZV7; H0Y6R1

**Gene Names:** GULP1

**Peptide Sequence:** SPSTDIFDMIPFSPISHQSSMPTR

**Total Number of Spectra:** 5

**Number of Replicates (out of 10):** 5

**Best Match Score:** 140.95

**Best Match Posterior Error Probability:** 3.81E-19

**Best Match Spectrum:**

**Scan number** 6353      **Raw file** 20100914-KD-Batch4-Prt-OGE-Mock-Frac18  
**Method** ITMS; CID      **Genenames** GULP1

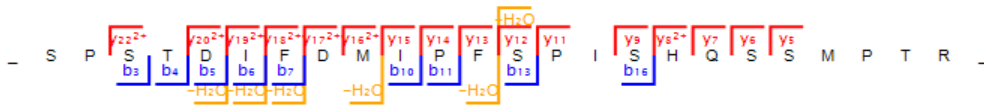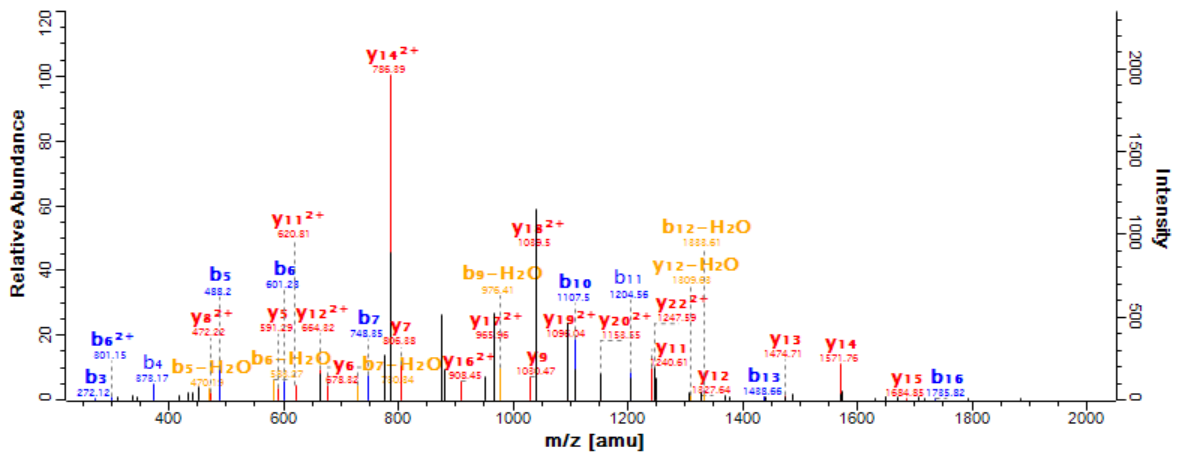

**Protein Group ID:** 303  
**Protein Accession Numbers:** B8ZZ98; Q8WVK2  
**Gene Names:** SNRNP27  
**Peptide Sequence:** LMGFASFDSTK  
**Total Number of Spectra:** 2  
**Number of Replicates (out of 10):** 2  
**Best Match Score:** 100.69  
**Best Match Posterior Error Probability:** 0.00025903  
**Best Match Spectrum:**

**Scan number** 3249      **Raw file** Prt-OGE-Batch3-Mock-Frac15  
**Method** ITMS; CID      **Genenames** SNRNP27

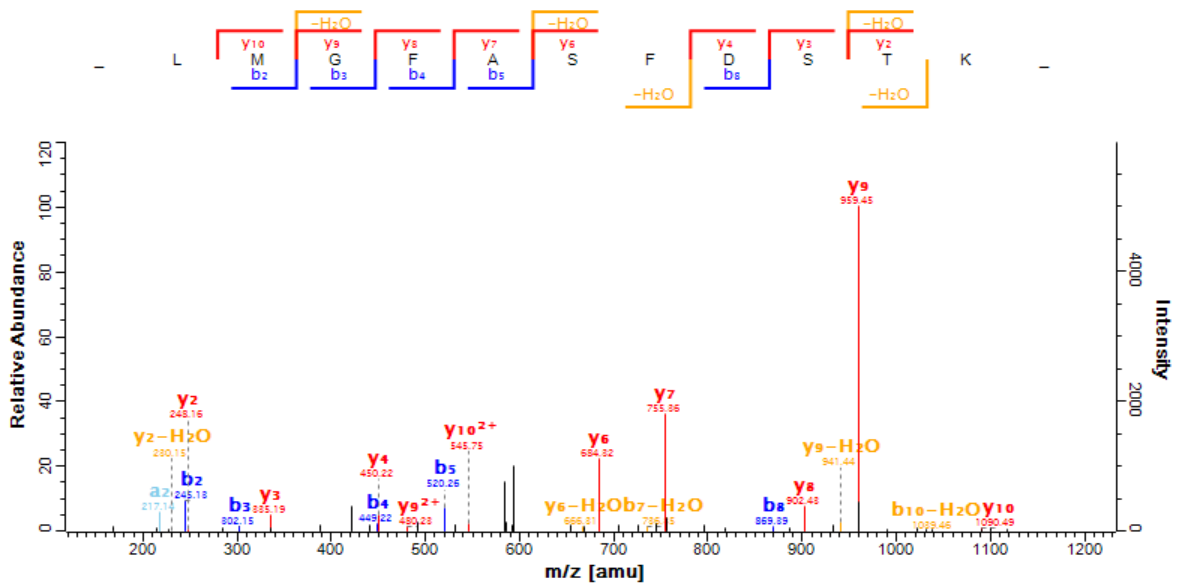

**Protein Group ID:** 304

**Protein Accession Numbers:** B8ZZD4; Q86VP1; Q86VP1-2; E7ENV2; Q86VP1-3

**Gene Names:** TAX1BP1

**Peptide Sequence:** AHQLEEDIVSVTHK

**Total Number of Spectra:** 1

**Number of Replicates (out of 10):** 1

**Best Match Score:** 80.96

**Best Match Posterior Error Probability:** 0.0015384

**Best Match Spectrum:**

|                    |           |                  |                           |
|--------------------|-----------|------------------|---------------------------|
| <b>Scan number</b> | 2858      | <b>Raw file</b>  | Prt-OGE-Batch3-Mock-Frac7 |
| <b>Method</b>      | ITMS; CID | <b>Genenames</b> | TAX1BP1                   |

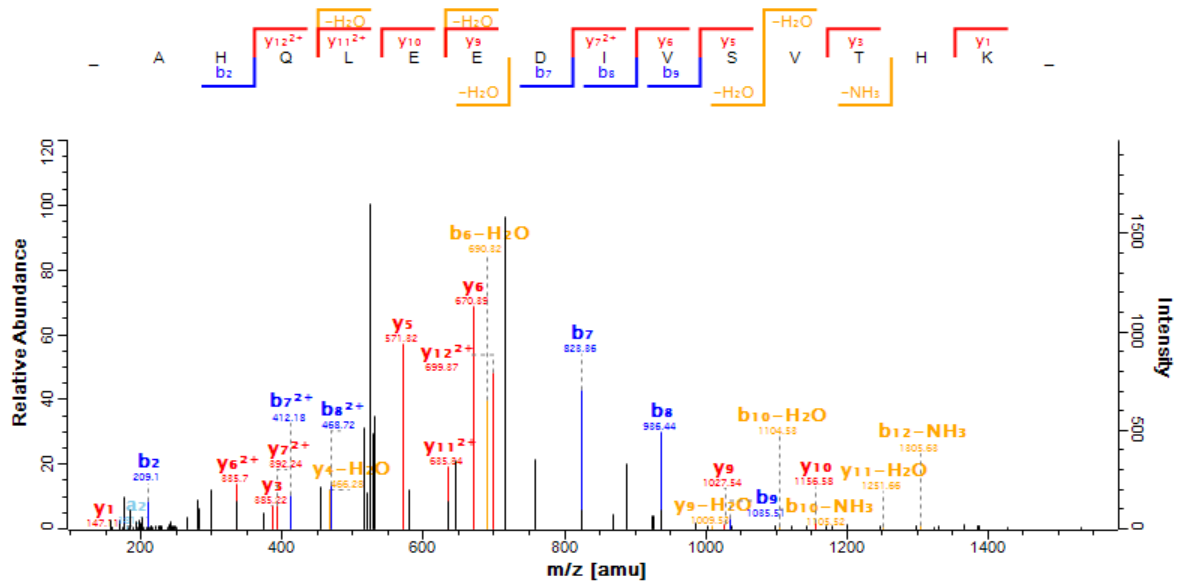

**Protein Group ID:** 306

**Protein Accession Numbers:** O75688; O75688-2; O75688-4; C9JIR6; B8ZZF0; O75688-3

**Gene Names:** PPM1B

**Peptide Sequence:** NVIEAVYSR

**Total Number of Spectra:** 3

**Number of Replicates (out of 10):** 3

**Best Match Score:** 92.538

**Best Match Posterior Error Probability:** 0.0014964

**Best Match Spectrum:**

|                    |           |                  |                           |
|--------------------|-----------|------------------|---------------------------|
| <b>Scan number</b> | 2886      | <b>Raw file</b>  | Prt-OGE-Batch3-Mock-Frac6 |
| <b>Method</b>      | ITMS; CID | <b>Genenames</b> | PPM1B                     |

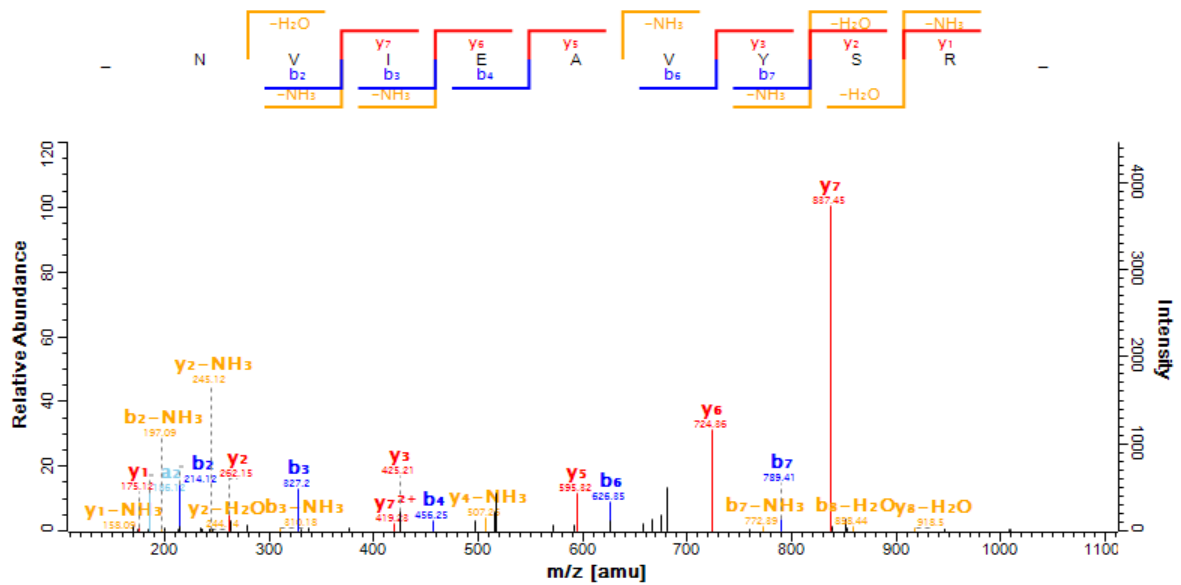

**Protein Group ID:** 311  
**Protein Accession Numbers:** Q9H8Y5; B8ZZS4  
**Gene Names:** ANKZF1  
**Peptide Sequence:** ALEEAGTILLR  
**Total Number of Spectra:** 1  
**Number of Replicates (out of 10):** 1  
**Best Match Score:** 93.258  
**Best Match Posterior Error Probability:** 0.00063699  
**Best Match Spectrum:**

**Scan number** 4717      **Raw file** Prt-OGE-Batch3-WT-Frac6  
**Method** ITMS; CID      **Genenames** ANKZF1

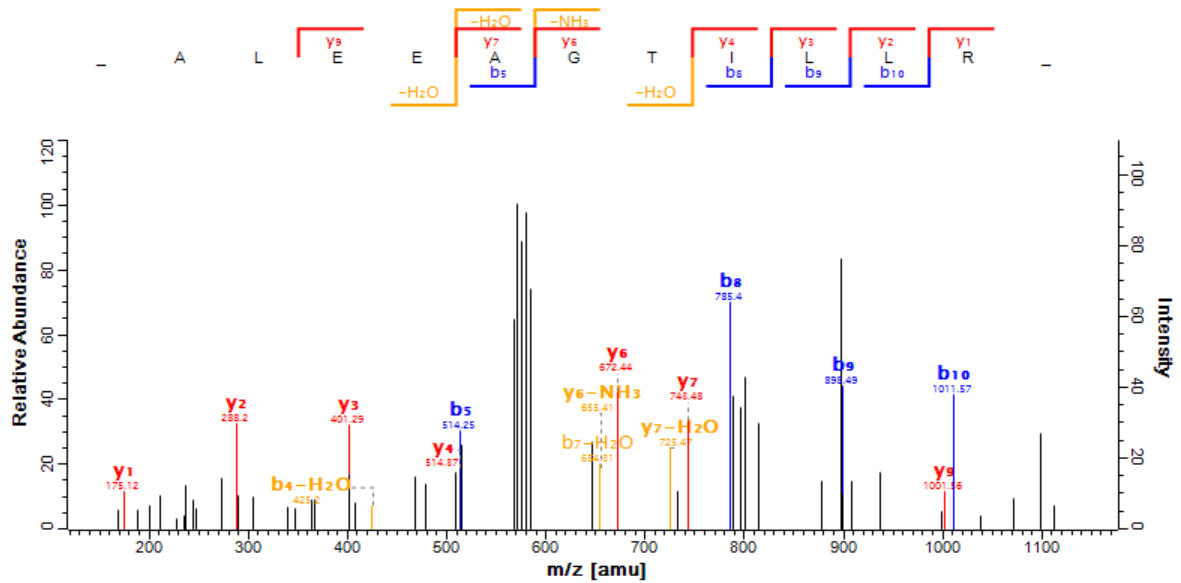

**Protein Group ID:** 314  
**Protein Accession Numbers:** Q86WW8; B9A057  
**Gene Names:** COA5  
**Peptide Sequence:** EDLGACLLQSDCVVQEGK  
**Total Number of Spectra:** 1  
**Number of Replicates (out of 10):** 1  
**Best Match Score:** 214.5  
**Best Match Posterior Error Probability:** 1.37E-54  
**Best Match Spectrum:**

**Scan number** 4239      **Raw file** 20100917-KD-Batch5-Prt-OGE-Mock-Frac22  
**Method** ITMS; CID      **Genenames** COA5

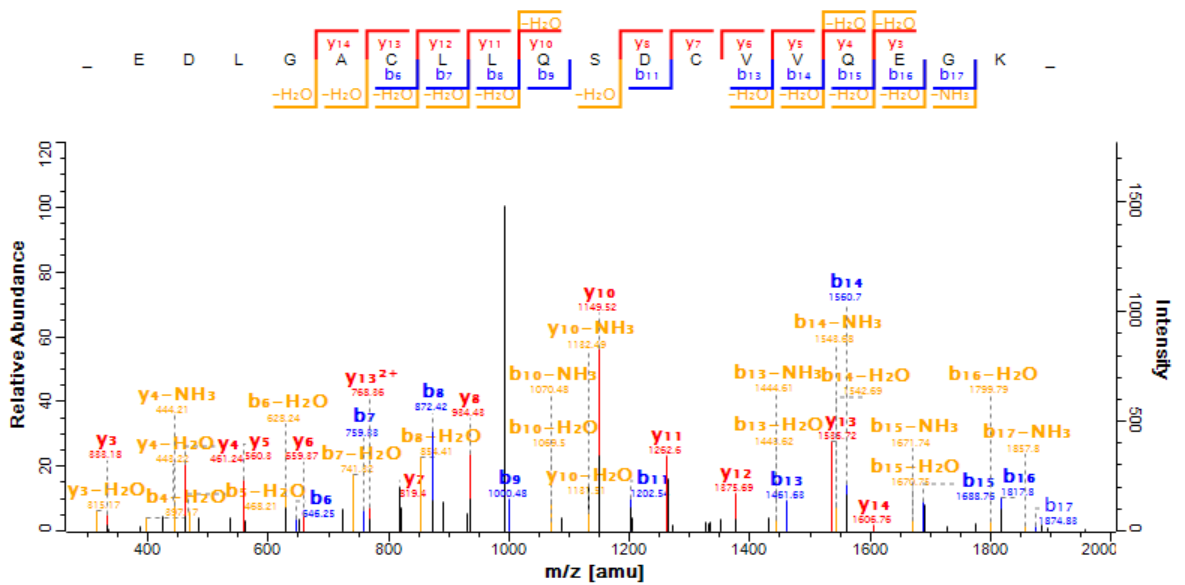

**Protein Group ID:** 317  
**Protein Accession Numbers:** Q5T653; C9IY40  
**Gene Names:** MRPL2  
**Peptide Sequence:** WIATENMQAGDTILNSNHIGR  
**Total Number of Spectra:** 1  
**Number of Replicates (out of 10):** 1  
**Best Match Score:** 113.29  
**Best Match Posterior Error Probability:** 9.65E-08  
**Best Match Spectrum:**

**Scan number** 4792      **Raw file** 20100927-KD-Batch4-Prt-OGE-WT-Frac17  
**Method** ITMS; CID      **Genenames** MRPL2

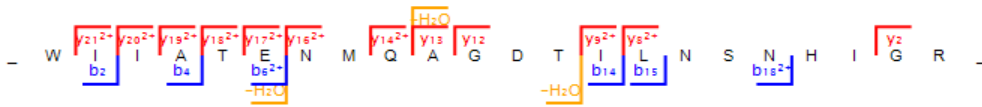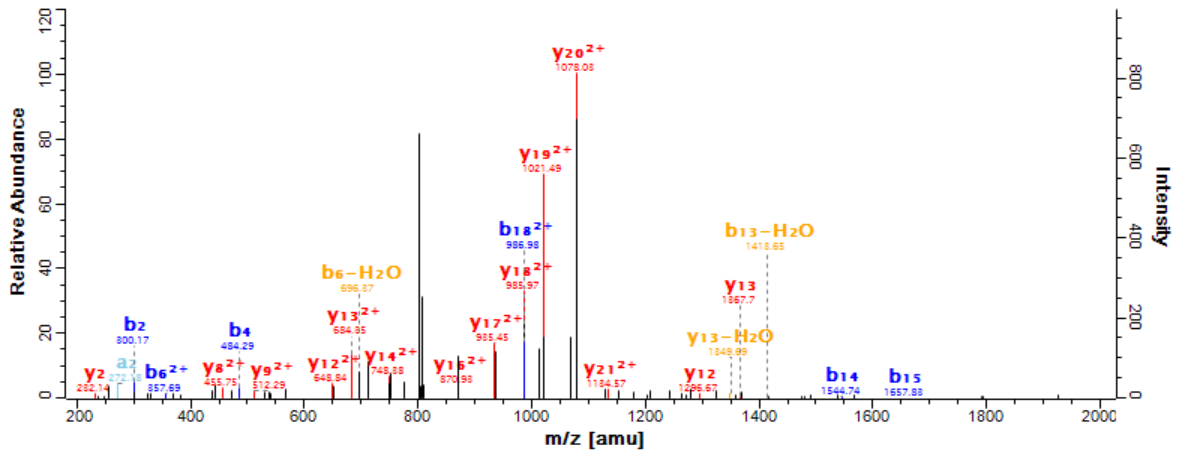



**Protein Group ID:** 323

**Protein Accession Numbers:** Q9NSU2; Q9NSU2-3; Q9NSU2-2; C9J052

**Gene Names:** TREX1

**Peptide Sequence:** EGLLAPLGLLAILTLAVATLYGLSLATPGE

**Total Number of Spectra:** 1

**Number of Replicates (out of 10):** 1

**Best Match Score:** 77.689

**Best Match Posterior Error Probability:** 2.94E-07

**Best Match Spectrum:**

**Scan number** 10544      **Raw file** 20100927-KD-Batch4-Prt-OGE-WT-Frac18  
**Method** ITMS; CID      **Genenames** TREX1

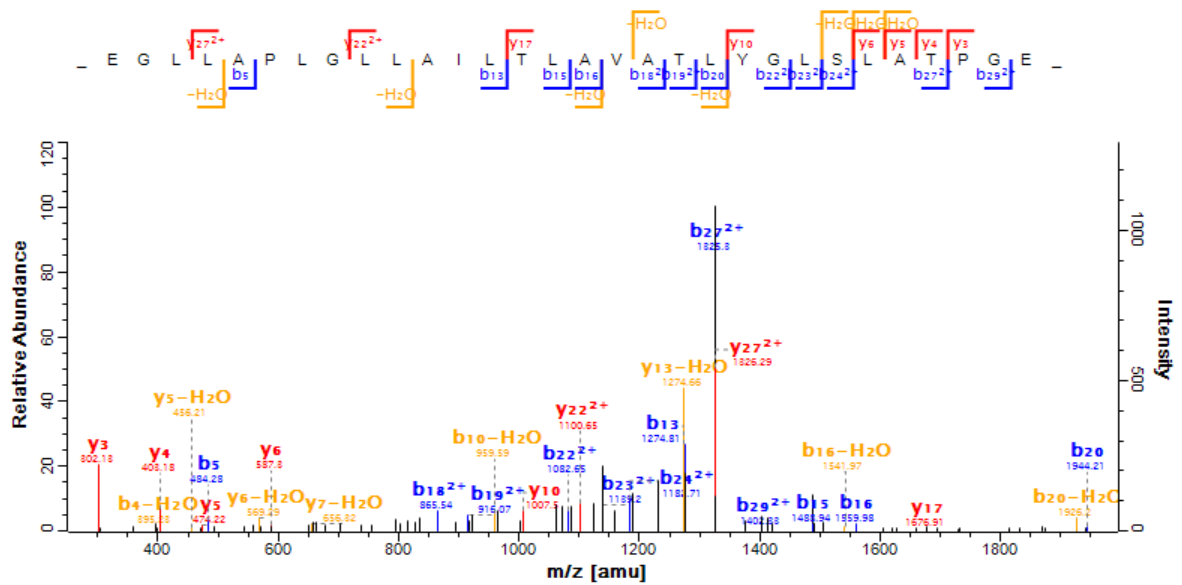

**Protein Group ID:** 325

**Protein Accession Numbers:** Q96GG9; C9JVE2; C9J8R4; C9JUW4; C9J0B2; C9JRU6

**Gene Names:** DCUN1D1

**Peptide Sequence:** LDVATDNFFQNPELYIR

**Total Number of Spectra:** 8

**Number of Replicates (out of 10):** 6

**Best Match Score:** 200.77

**Best Match Posterior Error Probability:** 5.58E-40

**Best Match Spectrum:**

|                    |           |                  |                |
|--------------------|-----------|------------------|----------------|
| <b>Scan number</b> | 5959      | <b>Raw file</b>  | OGE-Mock-Frac6 |
| <b>Method</b>      | ITMS; CID | <b>Genenames</b> | DCUN1D1        |

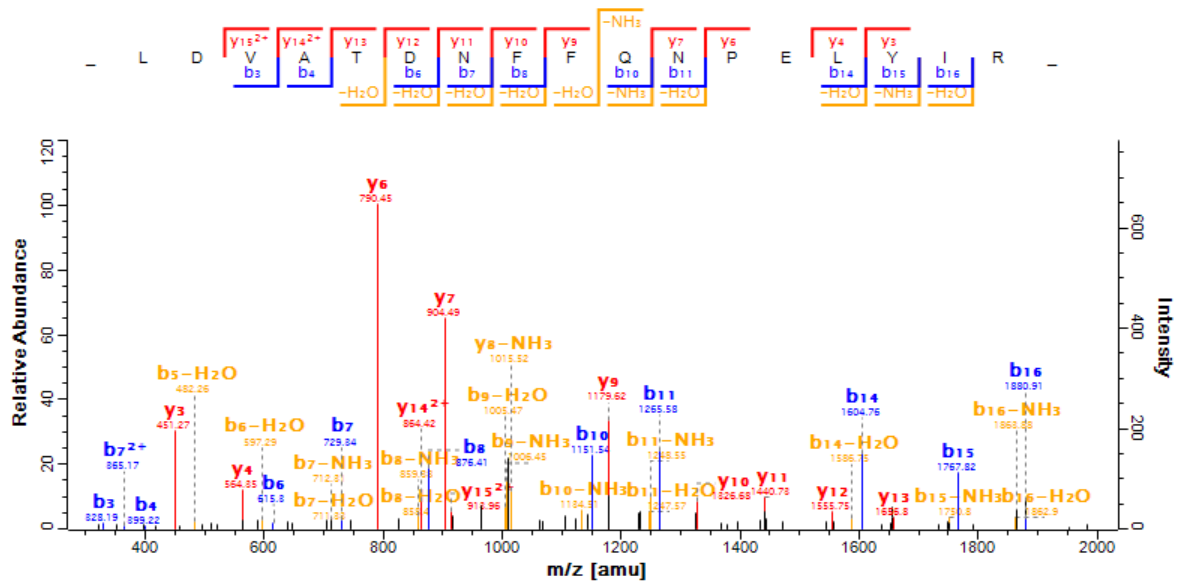

**Protein Group ID:** 334

**Protein Accession Numbers:** P10145-2; P10145; C9J4T6

**Gene Names:** IL8

**Peptide Sequence:** VIESGPHCANTEIIVK

**Total Number of Spectra:** 1

**Number of Replicates (out of 10):** 1

**Best Match Score:** 106.82

**Best Match Posterior Error Probability:** 0.00014423

**Best Match Spectrum:**

**Scan number** 2378      **Raw file** 20100930-KD-Batch5-Prt-OGE-WT-Frac22  
**Method** ITMS; CID      **Genenames** IL8

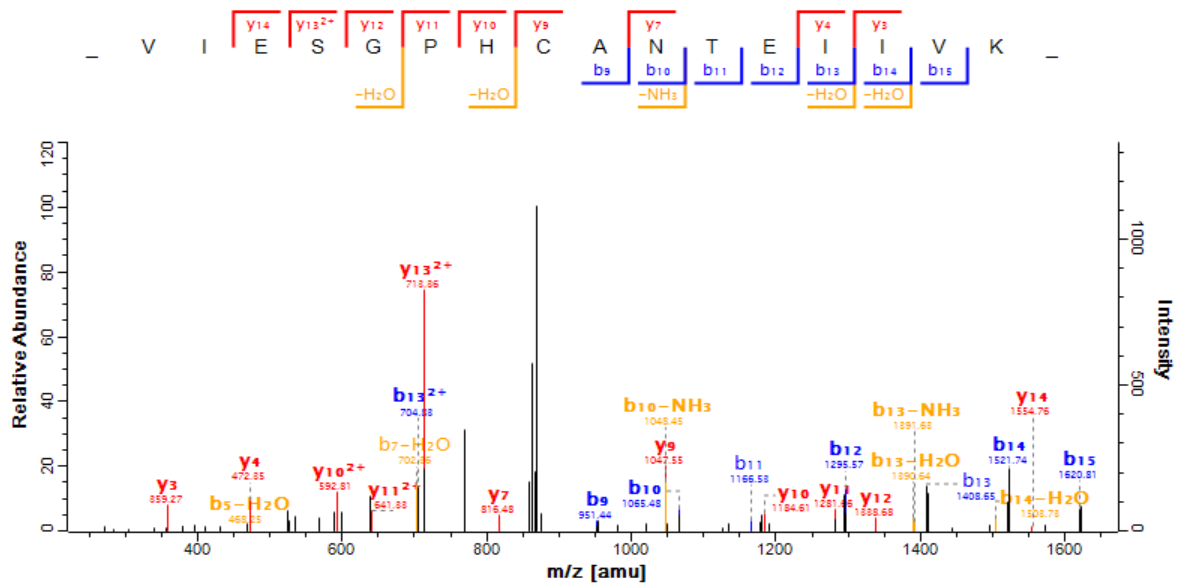

**Protein Group ID:** 337

**Protein Accession Numbers:** P51149; C9J592

**Gene Names:** RAB7A

**Peptide Sequence:** TLDSWRDEFLIQASPR

**Total Number of Spectra:** 1

**Number of Replicates (out of 10):** 1

**Best Match Score:** 129.77

**Best Match Posterior Error Probability:** 9.12E-05

**Best Match Spectrum:**

|                    |           |                  |              |
|--------------------|-----------|------------------|--------------|
| <b>Scan number</b> | 4242      | <b>Raw file</b>  | OGE-WT-Frac3 |
| <b>Method</b>      | ITMS; CID | <b>Genenames</b> | RAB7A        |

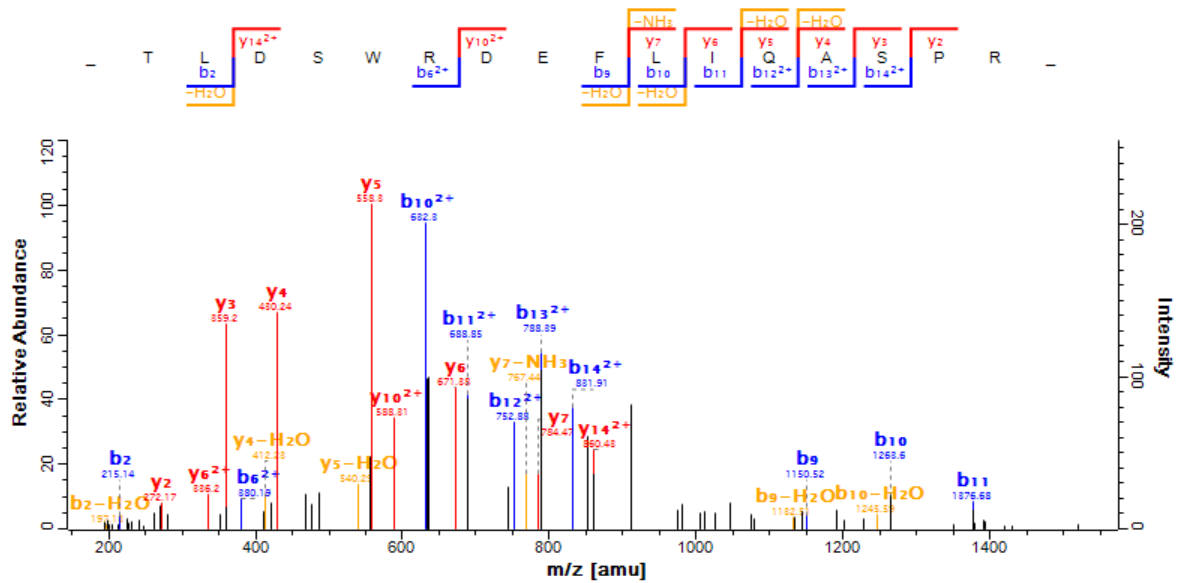

**Protein Group ID:** 339

**Protein Accession Numbers:** Q8N2F6; Q8N2F6-2; Q8N2F6-3; Q8N2F6-5; Q8N2F6-4; C9J5N7; F5GX65; H7BXQ8

**Gene Names:** ARMC10

**Peptide Sequence:** LLYLLESTEDPVIIER

**Total Number of Spectra:** 1

**Number of Replicates (out of 10):** 1

**Best Match Score:** 177.88

**Best Match Posterior Error Probability:** 8.61E-20

**Best Match Spectrum:**

|                    |           |                  |                            |
|--------------------|-----------|------------------|----------------------------|
| <b>Scan number</b> | 6561      | <b>Raw file</b>  | Prt-OGE-Batch2-Mock-Frac15 |
| <b>Method</b>      | ITMS: CID | <b>Genenames</b> | ARMC10                     |

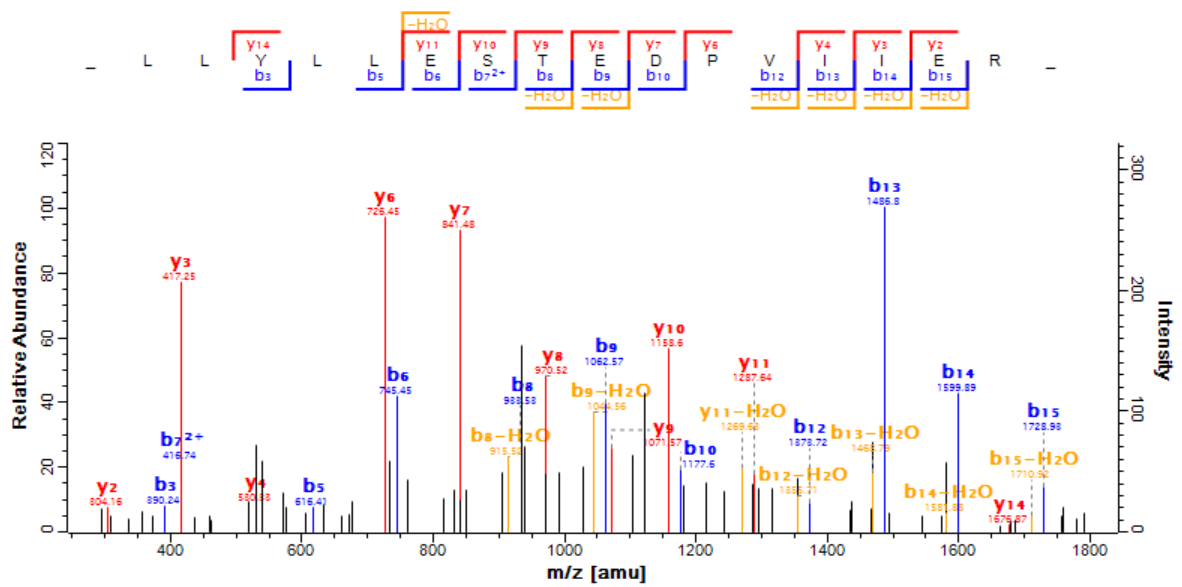

**Protein Group ID:** 340

**Protein Accession Numbers:** Q9UI15; C9J5W6; H7C5N2

**Gene Names:** TAGLN3

**Peptide Sequence:** TTDIFQTVDLWEGK

**Total Number of Spectra:** 1

**Number of Replicates (out of 10):** 1

**Best Match Score:** 87.647

**Best Match Posterior Error Probability:** 0.00074256

**Best Match Spectrum:**

|                    |           |                  |                          |
|--------------------|-----------|------------------|--------------------------|
| <b>Scan number</b> | 5021      | <b>Raw file</b>  | Prt-OGE-Batch2-WT-Frac18 |
| <b>Method</b>      | ITMS; CID | <b>Genenames</b> | TAGLN3                   |

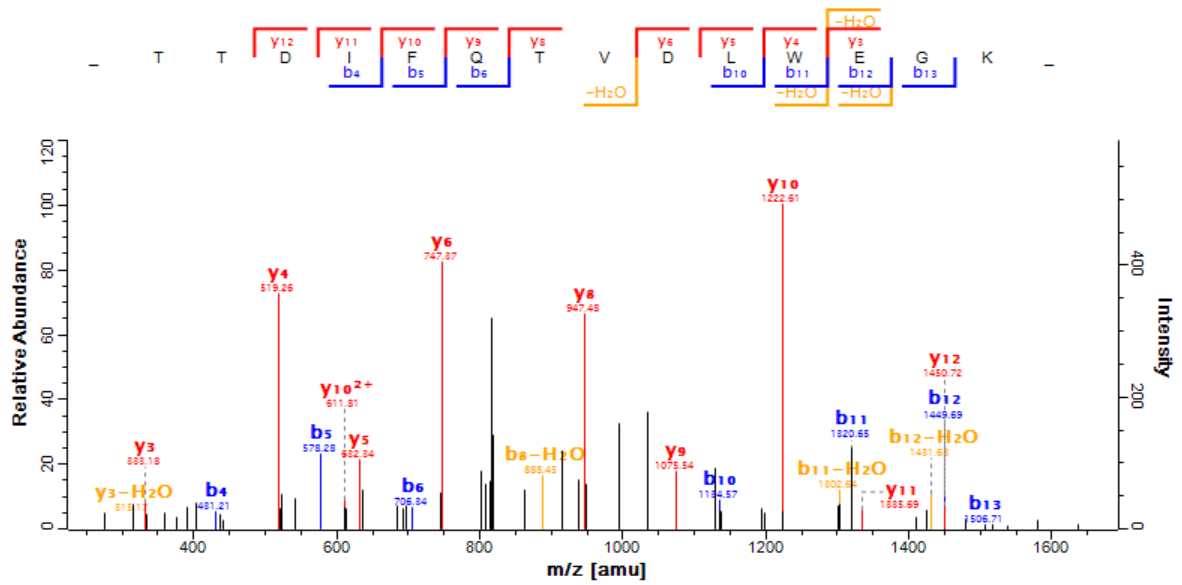

**Protein Group ID:** 342

**Protein Accession Numbers:** Q6GPH4; Q6GPH4-5; C9J7Z8; Q6GPH4-3; I3L3D9

**Gene Names:** XAF1

**Peptide Sequence:** LEHQQVGC TMCQSMQK

**Total Number of Spectra:** 1

**Number of Replicates (out of 10):** 1

**Best Match Score:** 127.3

**Best Match Posterior Error Probability:** 5.46E-05

**Best Match Spectrum:**

|                    |           |                  |                                      |
|--------------------|-----------|------------------|--------------------------------------|
| <b>Scan number</b> | 1298      | <b>Raw file</b>  | 20100930-KD-Batch5-Prt-OGE-WT-Frac20 |
| <b>Method</b>      | ITMS; CID | <b>Genenames</b> | XAF1                                 |

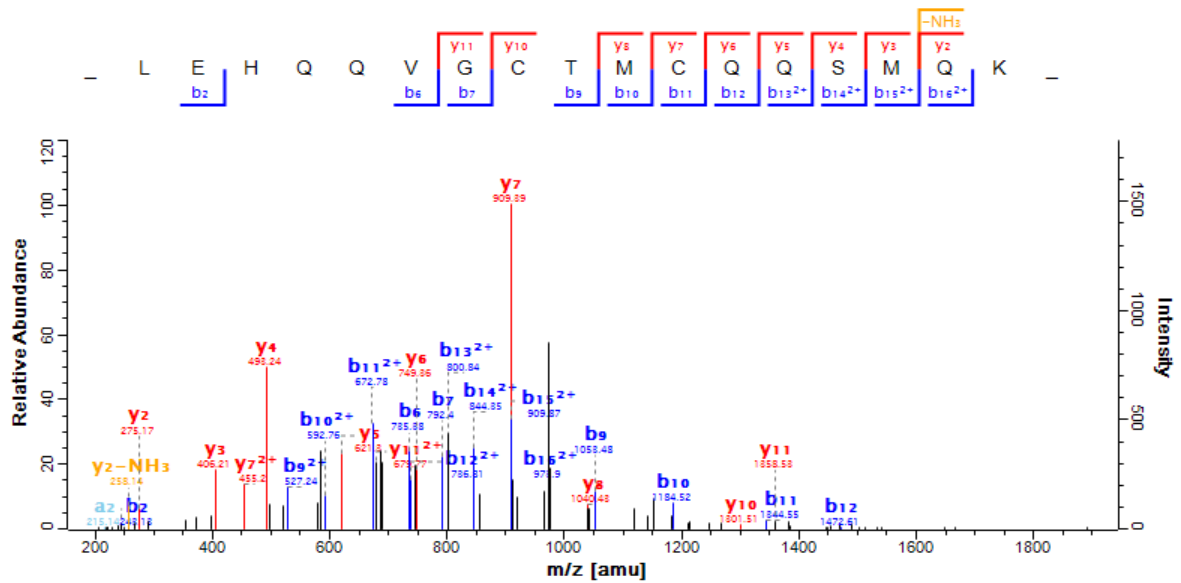

**Protein Group ID:** 343

**Protein Accession Numbers:** P16220; P16220-2; C9J896; C9JBT4; H7C1R5

**Gene Names:** CREB1

**Peptide Sequence:** TAPTSTIAPGVVMASSSPALP TQP AEEAAR

**Total Number of Spectra:** 1

**Number of Replicates (out of 10):** 1

**Best Match Score:** 55.789

**Best Match Posterior Error Probability:** 0.00029257

**Best Match Spectrum:**

**Scan number** 4647      **Raw file** 20100917-KD-Batch5-Prt-OGE-Mock-Frac7  
**Method** ITMS; CID      **Genenames** CREB1

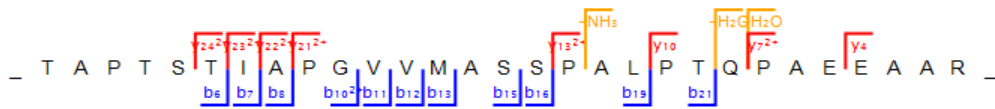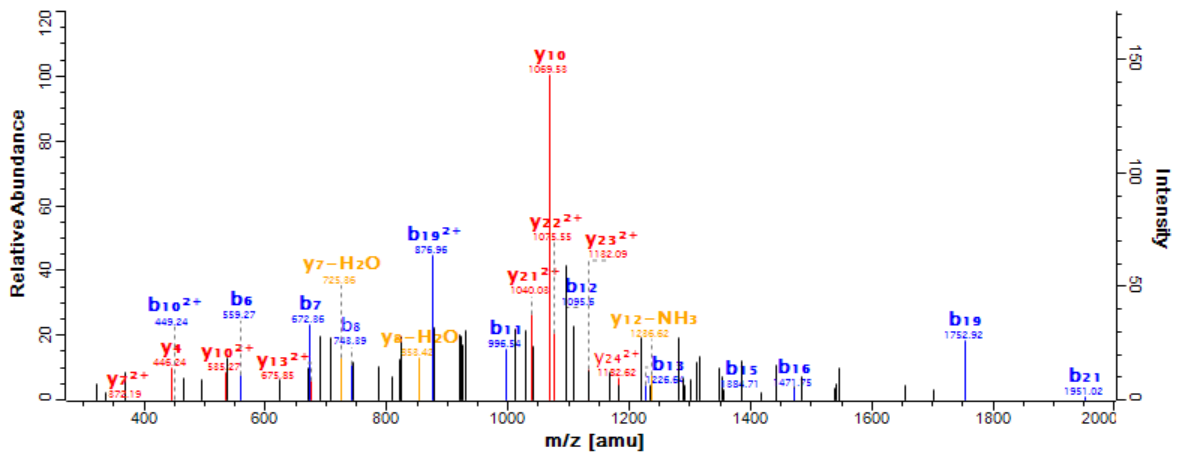



**Protein Group ID:** 347  
**Protein Accession Numbers:** C9J8T6; Q14061  
**Gene Names:** COX17  
**Peptide Sequence:** PGLVDSNPAPPESQEK  
**Total Number of Spectra:** 2  
**Number of Replicates (out of 10):** 2  
**Best Match Score:** 148.52  
**Best Match Posterior Error Probability:** 1.83E-07  
**Best Match Spectrum:**

**Scan number** 1359      **Raw file** Prt-OGE-Batch3-WT-Frac17  
**Method** ITMS; CID      **Genenames** COX17

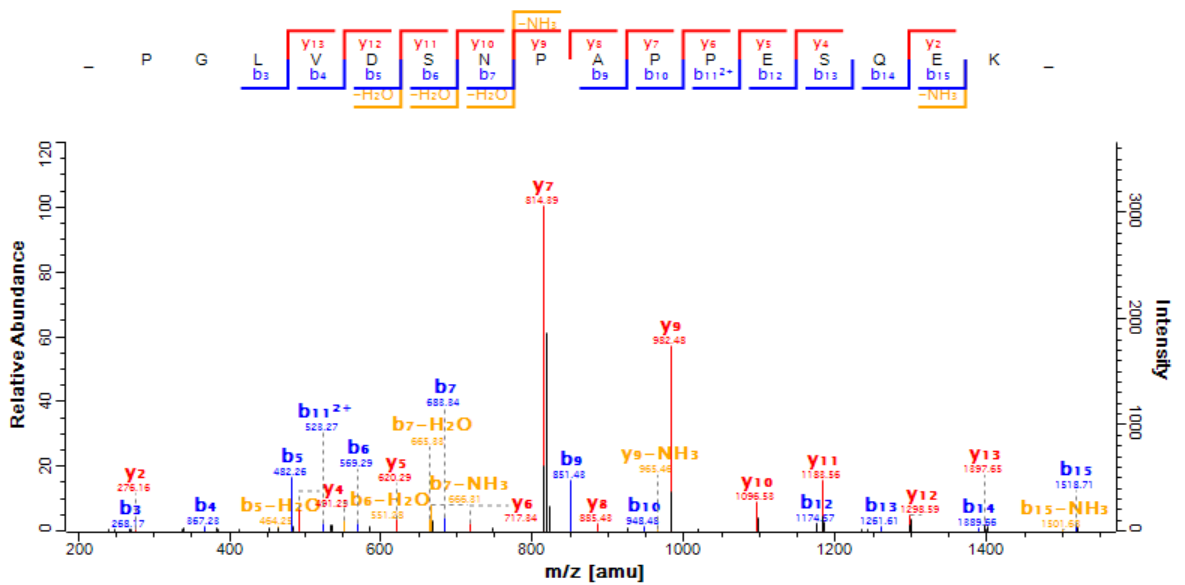

**Protein Group ID:** 350

**Protein Accession Numbers:** P18564; E9PEE8; C9JA97

**Gene Names:** ITGB6

**Peptide Sequence:** LGFGSFVEK

**Total Number of Spectra:** 22

**Number of Replicates (out of 10):** 8

**Best Match Score:** 128.27

**Best Match Posterior Error Probability:** 0.00028966

**Best Match Spectrum:**

|                    |           |                  |                                        |
|--------------------|-----------|------------------|----------------------------------------|
| <b>Scan number</b> | 3542      | <b>Raw file</b>  | 20100917-KD-Batch5-Prt-OGE-Mock-Frac11 |
| <b>Method</b>      | ITMS; CID | <b>Genenames</b> | ITGB6                                  |

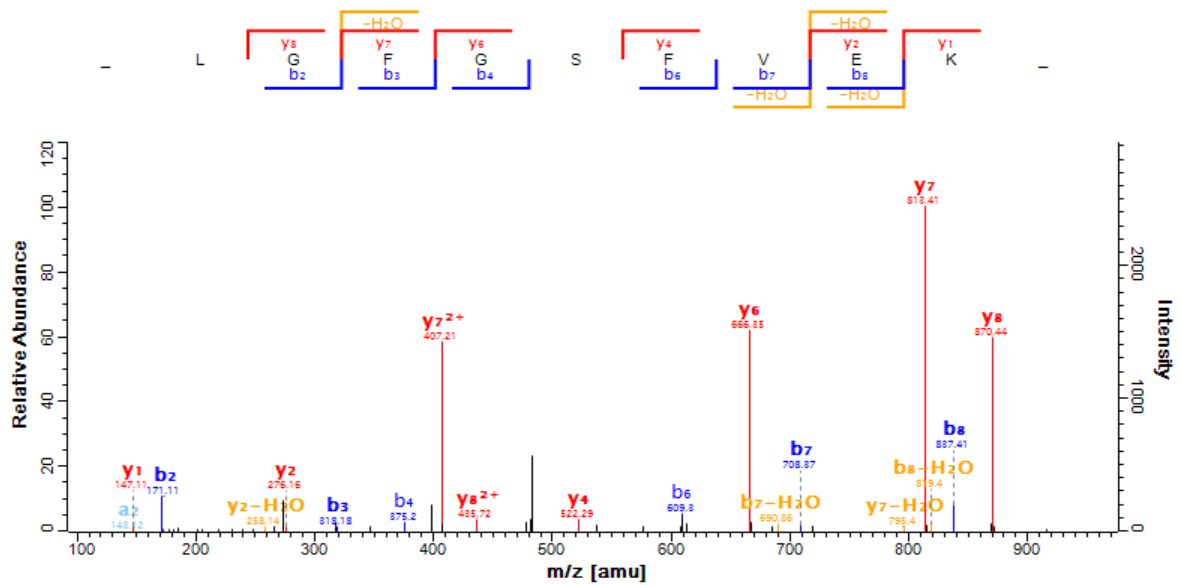

**Protein Group ID:** 356

**Protein Accession Numbers:** O15042; E7ET15; O15042-2; O15042-3; C9JB80; H7C4V2

**Gene Names:** U2SURP

**Peptide Sequence:** KPGQSFQEQVEHYR

**Total Number of Spectra:** 2

**Number of Replicates (out of 10):** 2

**Best Match Score:** 116.63

**Best Match Posterior Error Probability:** 0.0002432

**Best Match Spectrum:**

**Scan number** 1477      **Raw file** Prt-OGE-Batch3--Mock-Frac18  
**Method** ITMS; CID      **Genenames** U2SURP

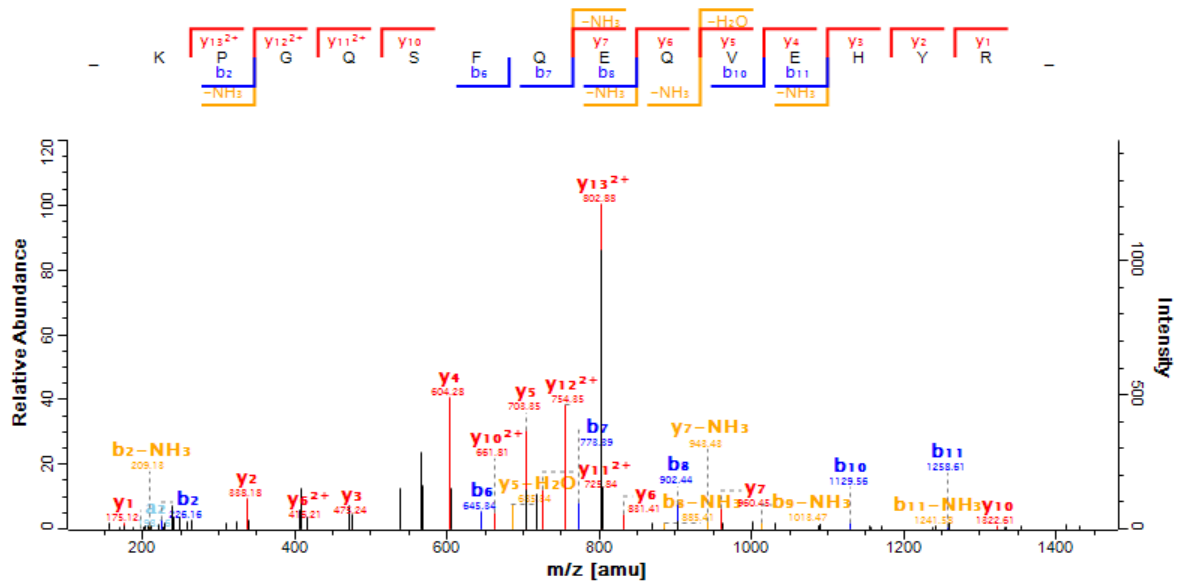

**Protein Group ID:** 372

**Protein Accession Numbers:** Q9NSI2; Q9NSI2-2; C9JJU7

**Gene Names:** FAM207A

**Peptide Sequence:** DWAFINTNIFAR

**Total Number of Spectra:** 2

**Number of Replicates (out of 10):** 2

**Best Match Score:** 160.52

**Best Match Posterior Error Probability:** 8.83E-06

**Best Match Spectrum:**

|                    |           |                  |                                        |
|--------------------|-----------|------------------|----------------------------------------|
| <b>Scan number</b> | 6060      | <b>Raw file</b>  | 20100914-KD-Batch4-Prt-OGE-Mock-Frac18 |
| <b>Method</b>      | ITMS; CID | <b>Genenames</b> | FAM207A                                |

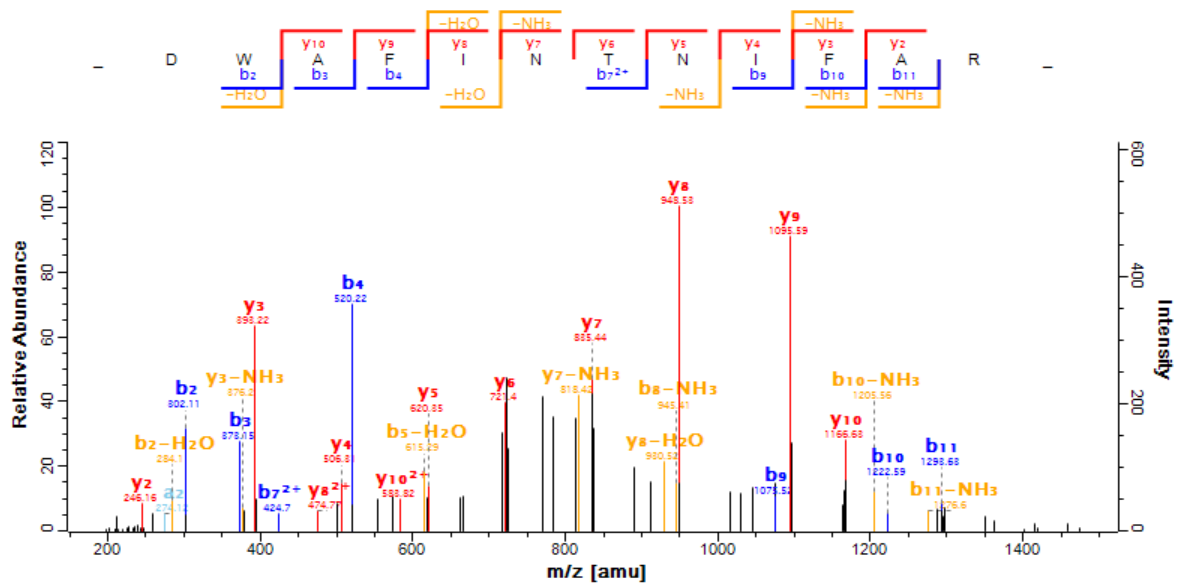

**Protein Group ID:** 376

**Protein Accession Numbers:** Q6P087; Q6P087-2; H7C1H7; H7C454; C9JM75; H7C0K7; Q6P087-3

**Gene Names:** RPUSD3

**Peptide Sequence:** SGPLGDQPFAGLLPK

**Total Number of Spectra:** 1

**Number of Replicates (out of 10):** 1

**Best Match Score:** 84.753

**Best Match Posterior Error Probability:** 0.000611

**Best Match Spectrum:**

**Scan number** 5301      **Raw file** 20100917-KD-Batch5-Prt-OGE-Mock-Frac23  
**Method** ITMS; CID      **Genenames** RPUSD3

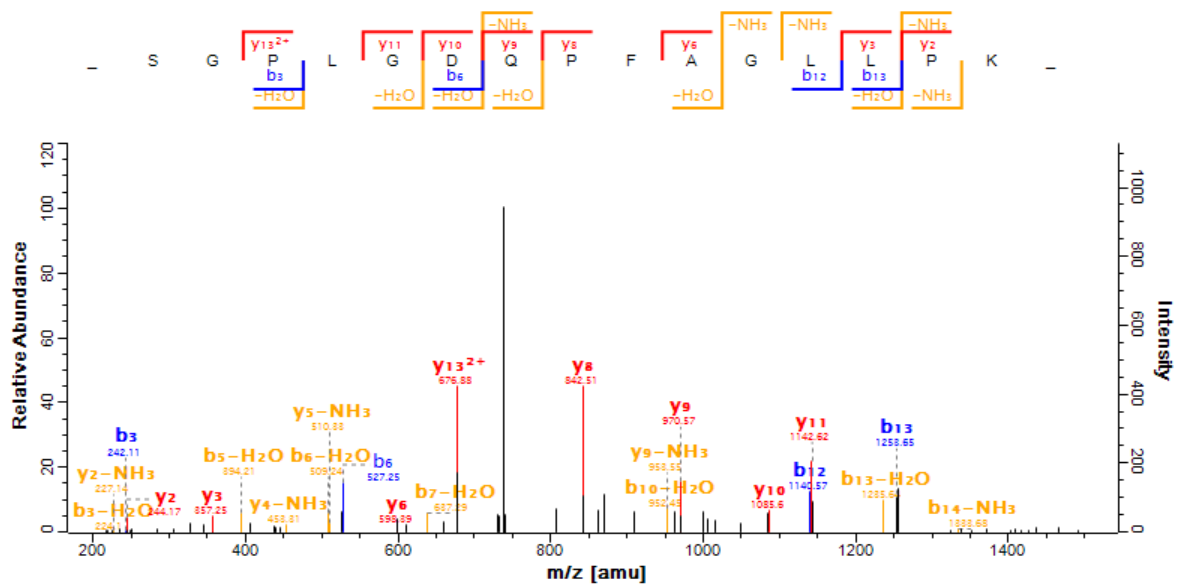

**Protein Group ID:** 377

**Protein Accession Numbers:** P35520-2; P35520; C9JMA6

**Gene Names:** CBS

**Peptide Sequence:** PSETPQAEVGP TGCPHR

**Total Number of Spectra:** 2

**Number of Replicates (out of 10):** 2

**Best Match Score:** 156

**Best Match Posterior Error Probability:** 2.51E-10

**Best Match Spectrum:**

|                    |           |                  |                                      |
|--------------------|-----------|------------------|--------------------------------------|
| <b>Scan number</b> | 1118      | <b>Raw file</b>  | 20100930-KD-Batch5-Prt-OGE-WT-Frac14 |
| <b>Method</b>      | ITMS; CID | <b>Genenames</b> | CBS                                  |

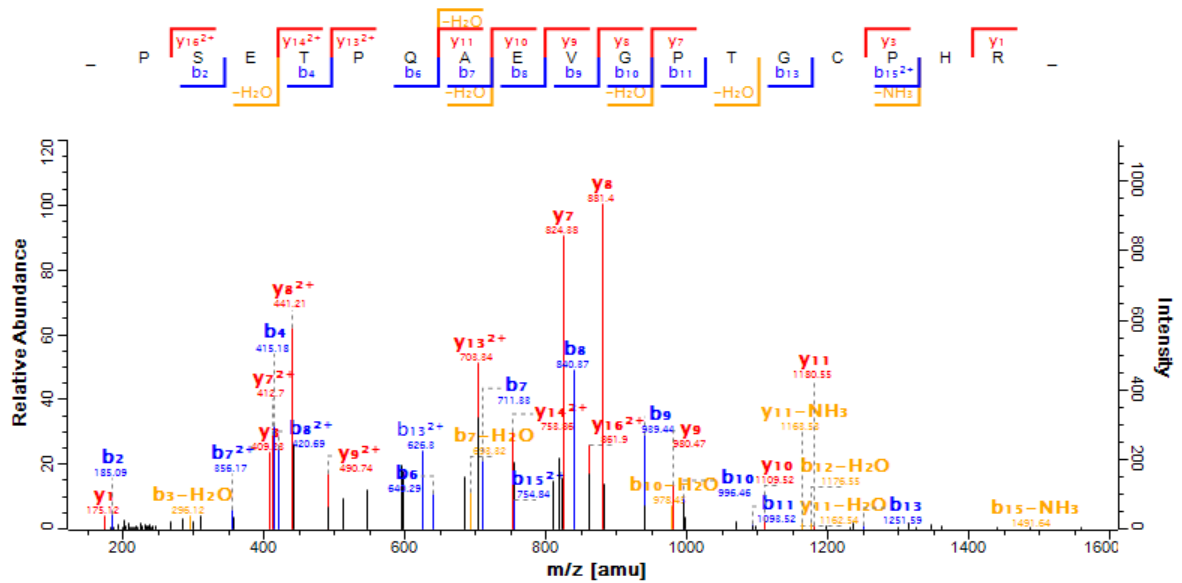

**Protein Group ID:** 387

**Protein Accession Numbers:** P42575; P42575-2; C9JRR9; E9PDN0

**Gene Names:** CASP2

**Peptide Sequence:** VGSFSQNVLLPDK

**Total Number of Spectra:** 1

**Number of Replicates (out of 10):** 1

**Best Match Score:** 82.529

**Best Match Posterior Error Probability:** 0.00086683

**Best Match Spectrum:**

|                    |           |                  |                                      |
|--------------------|-----------|------------------|--------------------------------------|
| <b>Scan number</b> | 6416      | <b>Raw file</b>  | 20100927-KD-Batch4-Prt-OGE-WT-Frac15 |
| <b>Method</b>      | ITMS; CID | <b>Genenames</b> | CASP2                                |

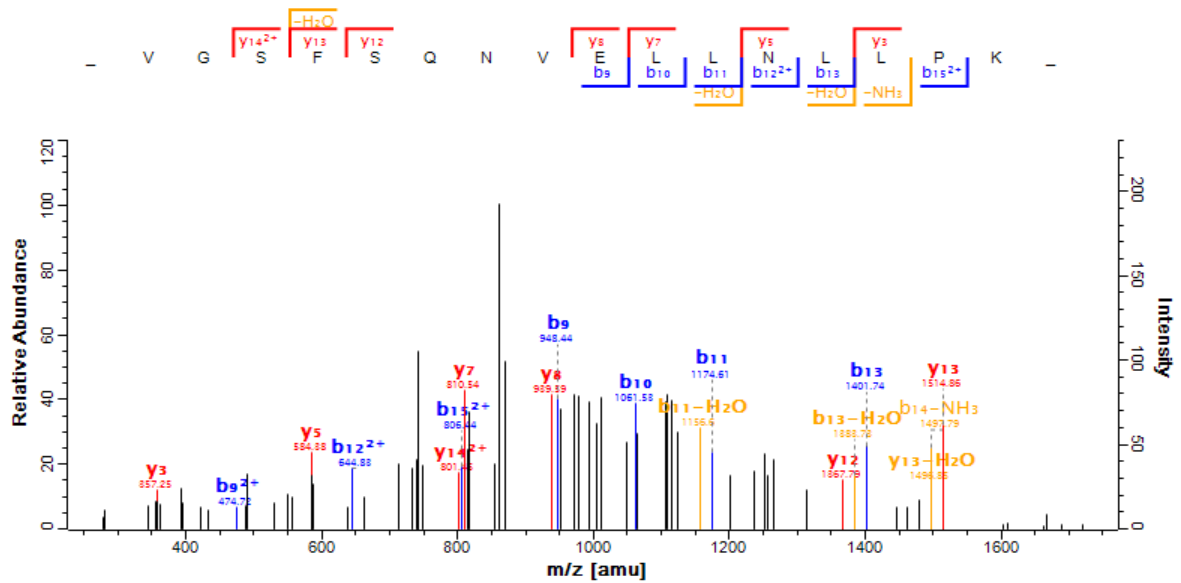

**Protein Group ID:** 388

**Protein Accession Numbers:** P52747; E7ER34; E7EN86; P52747-2; C9JTC5; E9PJF2; E9PMY8; E9PS81; E9PLN4; C9JRS3; E9PPB0

**Gene Names:** ZNF143

**Peptide Sequence:** LIDGQVIQLEDGSAAYVQHPK

**Total Number of Spectra:** 1

**Number of Replicates (out of 10):** 1

**Best Match Score:** 116.65

**Best Match Posterior Error Probability:** 4.84E-10

**Best Match Spectrum:**

|                    |           |                  |                            |
|--------------------|-----------|------------------|----------------------------|
| <b>Scan number</b> | 5891      | <b>Raw file</b>  | Prt-OGE-Batch3-Mock-Frac10 |
| <b>Method</b>      | ITMS: CID | <b>Genenames</b> | ZNF143                     |

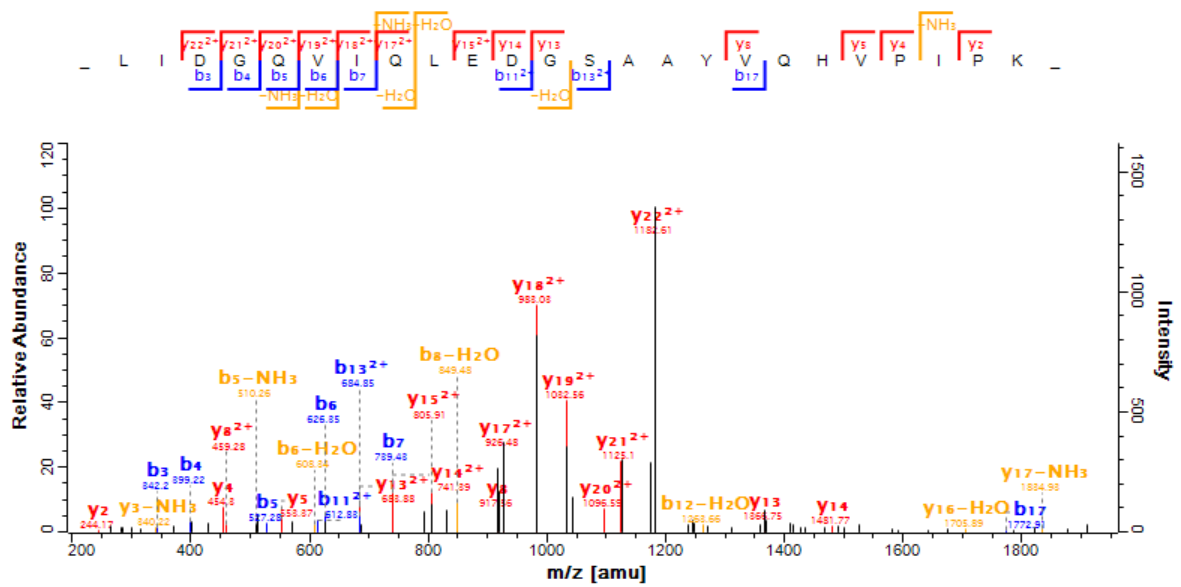



**Protein Group ID:** 389

**Protein Accession Numbers:** F5H189; C9JRX8; Q9HD34; H7C4Q5; C9JY28

**Gene Names:** LYRM4

**Peptide Sequence:** NVKDPVVEIQTLVNK

**Total Number of Spectra:** 2

**Number of Replicates (out of 10):** 2

**Best Match Score:** 147.33

**Best Match Posterior Error Probability:** 1.43E-06

**Best Match Spectrum:**

|                    |           |                  |                                        |
|--------------------|-----------|------------------|----------------------------------------|
| <b>Scan number</b> | 3080      | <b>Raw file</b>  | 20100917-KD-Batch5-Prt-OGE-Mock-Frac21 |
| <b>Method</b>      | ITMS; CID | <b>Genenames</b> | LYRM4                                  |

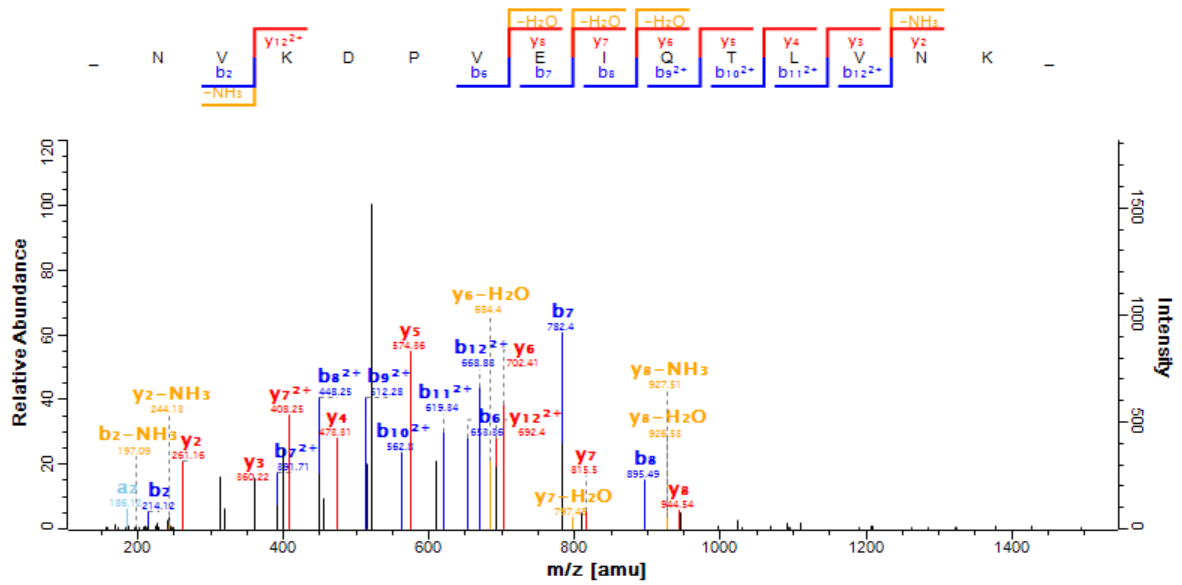

**Protein Group ID:** 394

**Protein Accession Numbers:** Q96I51; F5H6C7; F5GX55; C9JWG9

**Gene Names:** WBSR16

**Peptide Sequence:** KVVENEIYSESHR

**Total Number of Spectra:** 2

**Number of Replicates (out of 10):** 2

**Best Match Score:** 116.63

**Best Match Posterior Error Probability:** 0.00034469

**Best Match Spectrum:**

**Scan number** 1054      **Raw file** 20100930-KD-Batch5-Prt-OGE-WT-Frac18  
**Method** ITMS; CID      **Genenames** WBSR16

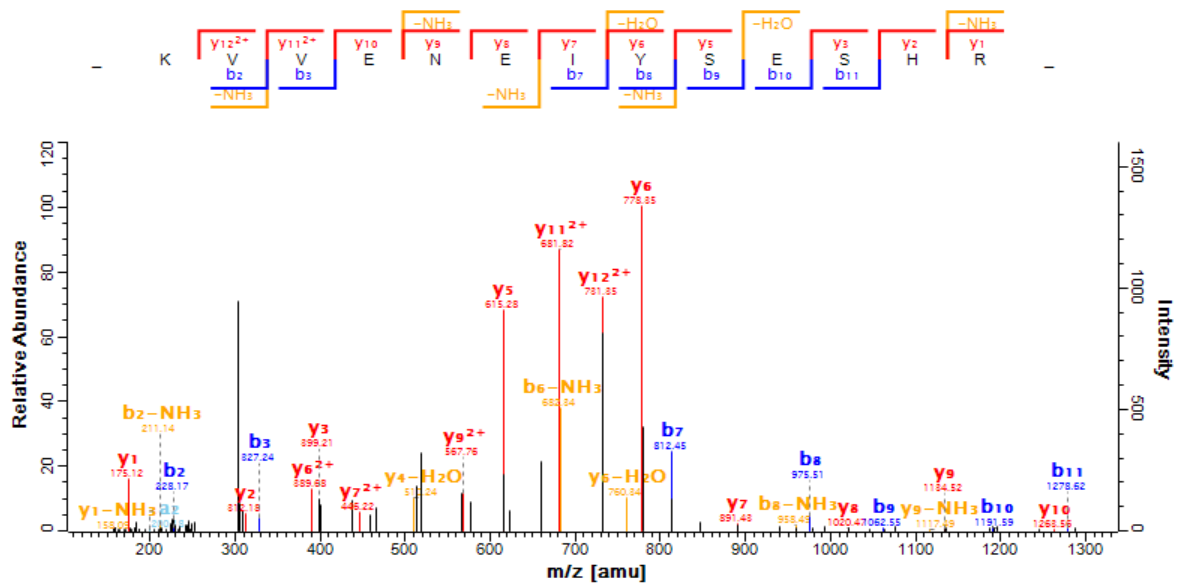

**Protein Group ID:** 402

**Protein Accession Numbers:** C9K0X5; O95149; H3BRI5; H3BSK1; H3BTA6; H3BQR0

**Gene Names:** SNUPN

**Peptide Sequence:** MEELSQLASSFSVSQDLNSTAAPHPR

**Total Number of Spectra:** 16

**Number of Replicates (out of 10):** 9

**Best Match Score:** 120.33

**Best Match Posterior Error Probability:** 3.02E-21

**Best Match Spectrum:**

**Scan number** 6176      **Raw file** Prt-OGE-Batch2-WT-Frac13  
**Method** ITMS; CID      **Genenames** SNUPN

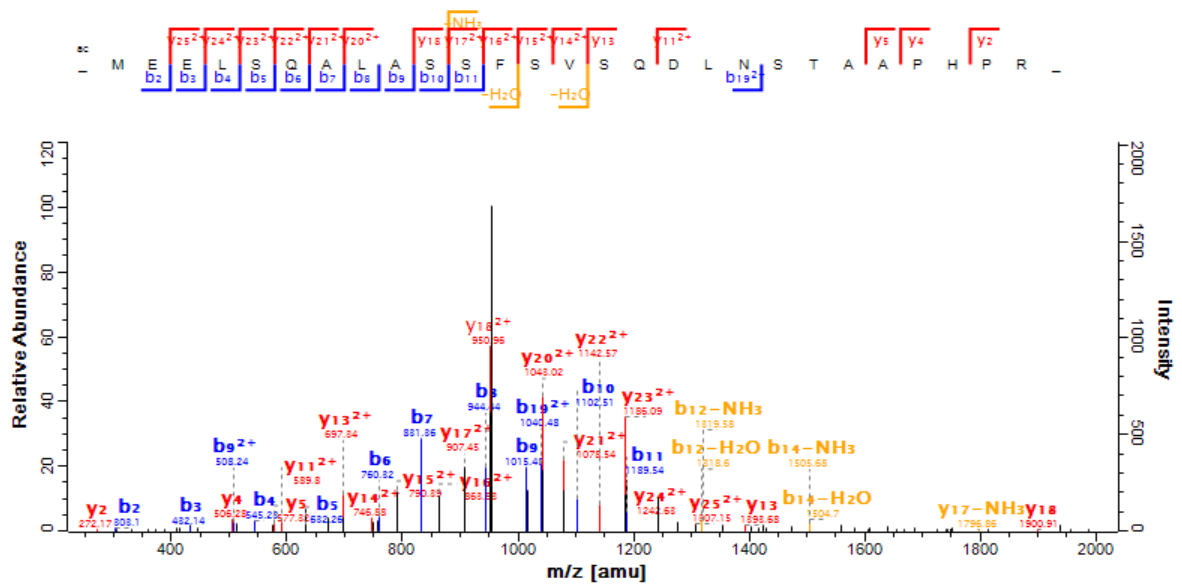

**Protein Group ID:** 403  
**Protein Accession Numbers:** CON\_\_A2A4G1  
**Gene Names:**  
**Peptide Sequence:** ALEQANTELEVK  
**Total Number of Spectra:** 2  
**Number of Replicates (out of 10):** 2  
**Best Match Score:** 157.56  
**Best Match Posterior Error Probability:** 0.0026744  
**Best Match Spectrum:**

**Scan number** 2164      **Raw file** Prt-OGE-Batch2-WT-Frac12  
**Method** ITMS; CID      **Pepti...** 157.56

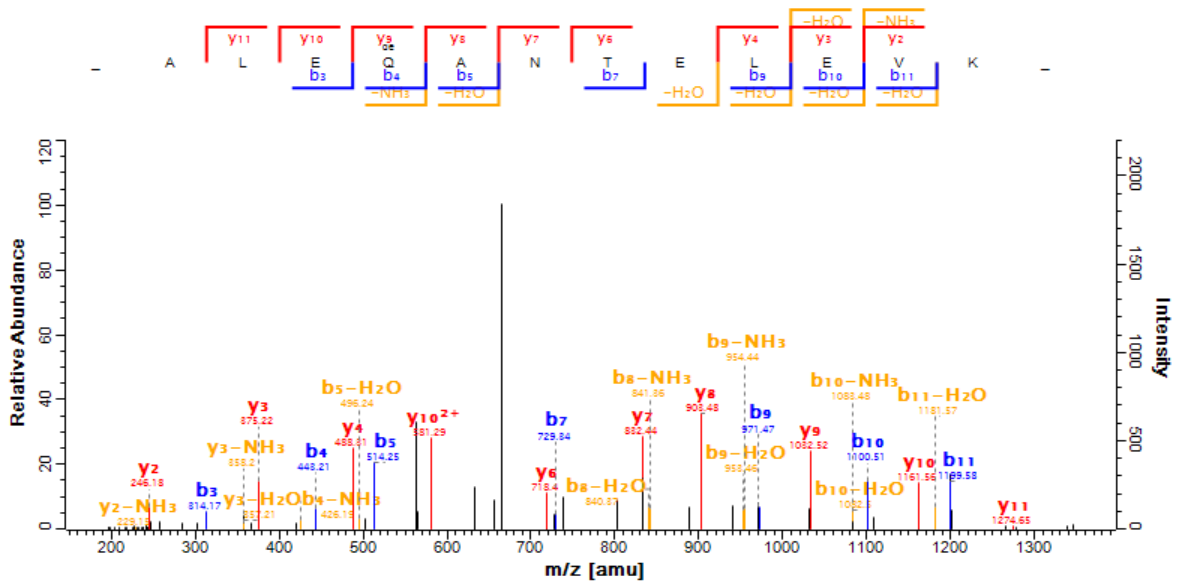

**Protein Group ID:** 404

**Protein Accession Numbers:** CON\_\_A2I7N0; CON\_\_A2I7N1

**Gene Names:**

**Peptide Sequence:** VNRPFLLIYVVK

**Total Number of Spectra:** 2

**Number of Replicates (out of 10):** 2

**Best Match Score:** 112.83

**Best Match Posterior Error Probability:** 0.00067781

**Best Match Spectrum:**

**Scan number** 4660      **Raw file** OGE-WT-Frac3  
**Method** ITMS; CID      **Pepti...** 112.83

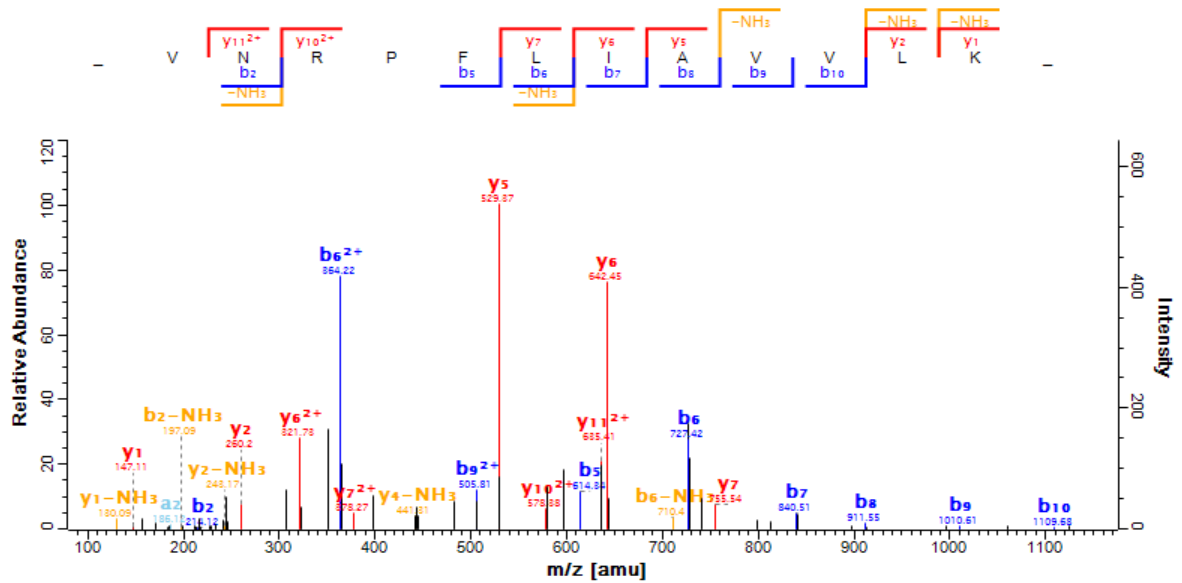

**Protein Group ID:** 405  
**Protein Accession Numbers:** CON\_\_A2I7N3  
**Gene Names:**  
**Peptide Sequence:** FSISSHYQLK  
**Total Number of Spectra:** 21  
**Number of Replicates (out of 10):** 10  
**Best Match Score:** 170.47  
**Best Match Posterior Error Probability:** 5.68E-07  
**Best Match Spectrum:**

**Scan number** 2525      **Raw file** 201100930-KD-Batch5-Prt-OGE-WT-Frac5  
**Method** ITMS; CID      **Pepti...** 170.47

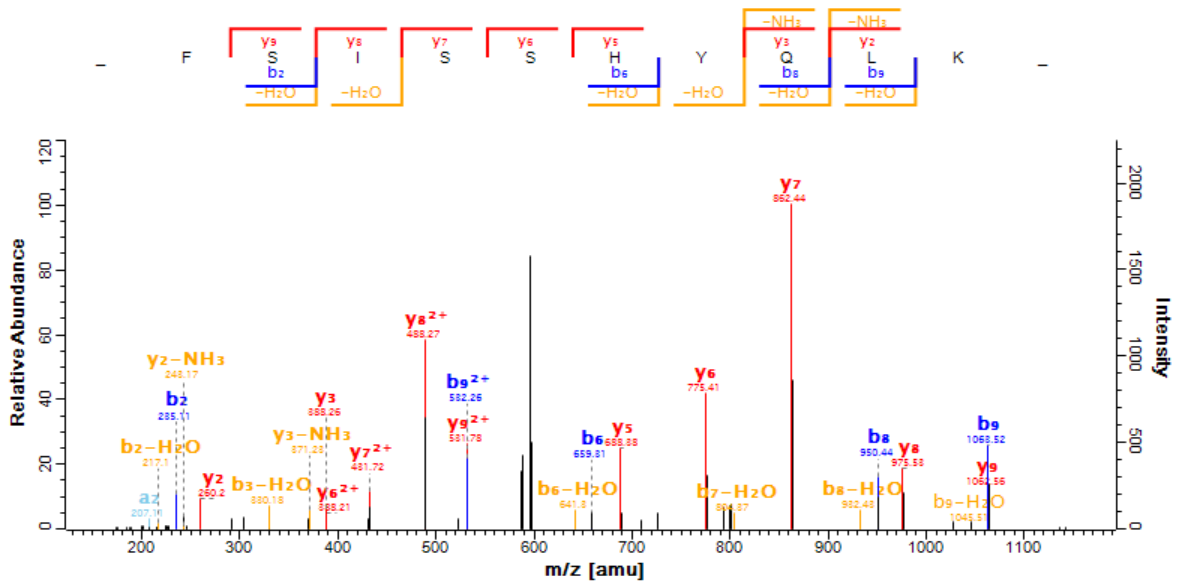

**Protein Group ID:** 410

**Protein Accession Numbers:** CON\_\_ENSEMBL:ENSBTAP00000018574

**Gene Names:**

**Peptide Sequence:** VGAADNVFLAPVGVSAAMAMLSLGLAGDTHQEVHTALR

**Total Number of Spectra:** 3

**Number of Replicates (out of 10):** 3

**Best Match Score:** 53.522

**Best Match Posterior Error Probability:** 0.00011249

**Best Match Spectrum:**

**Scan number** 7293      **Raw file** OGE-WT-Frac6  
**Method** ITMS; CID      **Pepti...** 53.52

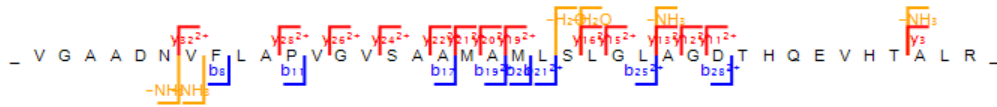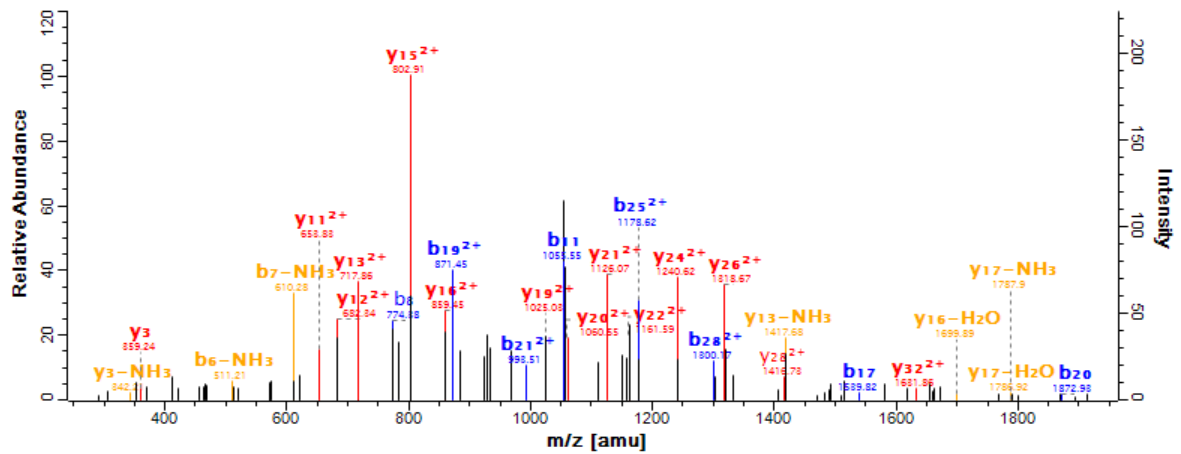

**Protein Group ID:** 412

**Protein Accession Numbers:** CON\_\_ENSEMBL:ENSBTAP00000038253

**Gene Names:**

**Peptide Sequence:** NTKVEISELNR

**Total Number of Spectra:** 1

**Number of Replicates (out of 10):** 1

**Best Match Score:** 83.081

**Best Match Posterior Error Probability:** 0.0063805

**Best Match Spectrum:**

**Scan number** 1615      **Raw file** Prt-OGE-Batch2-WT-Frac3  
**Method** ITMS; CID      **Pepti...** 83.08

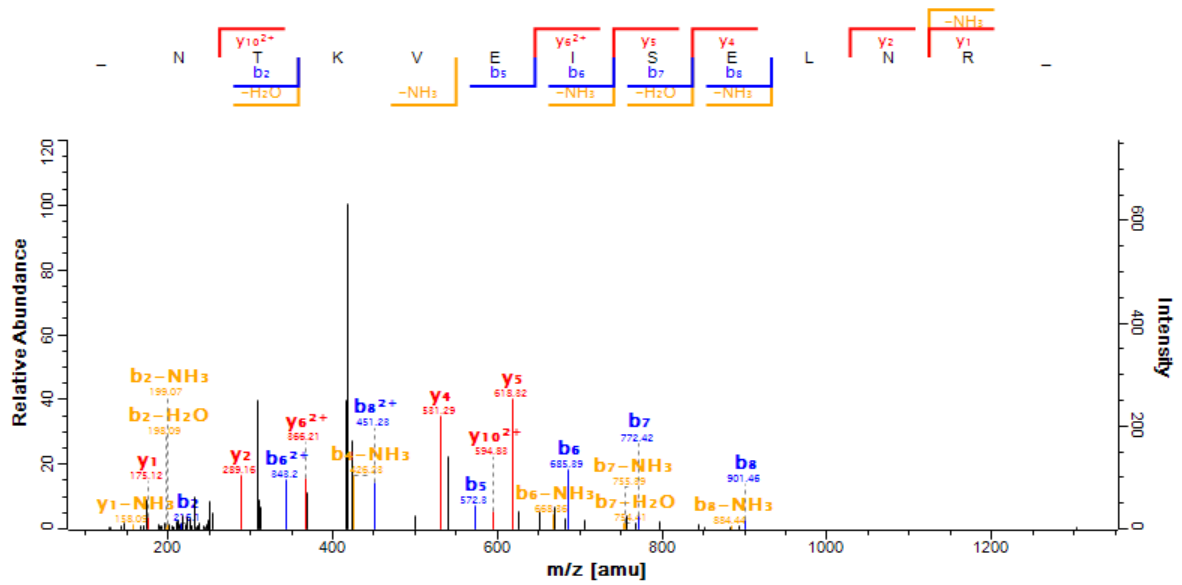



**Protein Group ID:** 413

**Protein Accession Numbers:** CON\_\_ENSEMBL:ENSBTAP00000038329

**Gene Names:**

**Peptide Sequence:** LPENVTPPEEQHK

**Total Number of Spectra:** 13

**Number of Replicates (out of 10):** 5

**Best Match Score:** 169.89

**Best Match Posterior Error Probability:** 2.58E-07

**Best Match Spectrum:**

|                    |           |                 |             |
|--------------------|-----------|-----------------|-------------|
| <b>Scan number</b> | 1303      | <b>Raw file</b> | OGEWT-Frac4 |
| <b>Method</b>      | ITMS; CID | <b>Pepti...</b> | 169.89      |

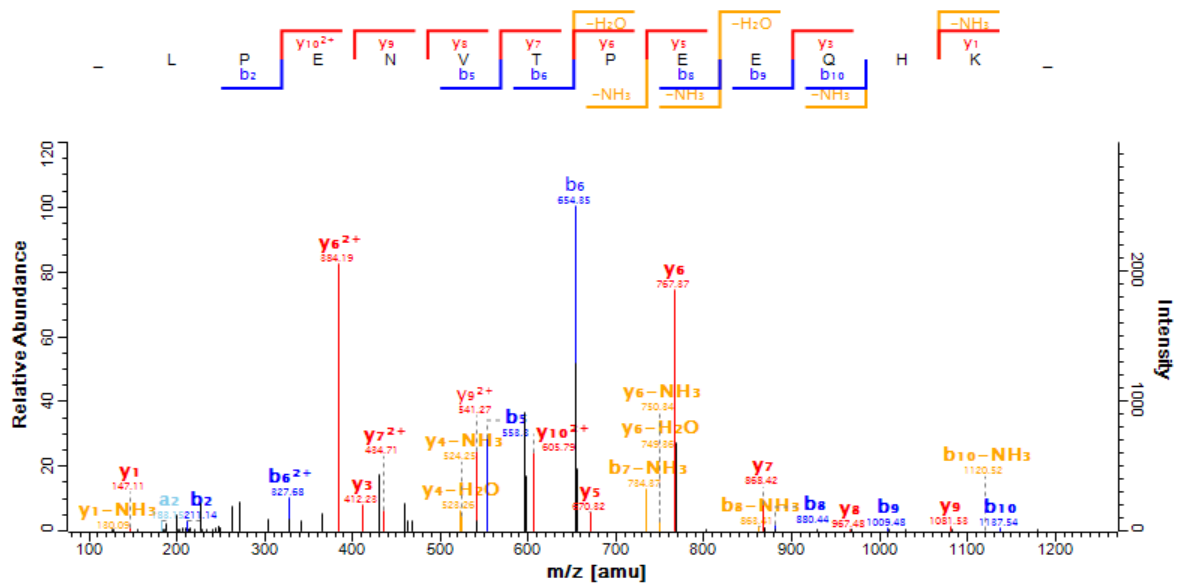

**Protein Group ID:** 414

**Protein Accession Numbers:** CON\_\_H-INV:HIT000292931

**Gene Names:**

**Peptide Sequence:** LVSESSDILPK

**Total Number of Spectra:** 2

**Number of Replicates (out of 10):** 2

**Best Match Score:** 101.39

**Best Match Posterior Error Probability:** 0.00024992

**Best Match Spectrum:**

**Scan number** 2920      **Raw file** 20100927-KD-Batch4-Prt-OGE-WT-Frac12  
**Method** ITMS; CID      **Pepti...** 101.39

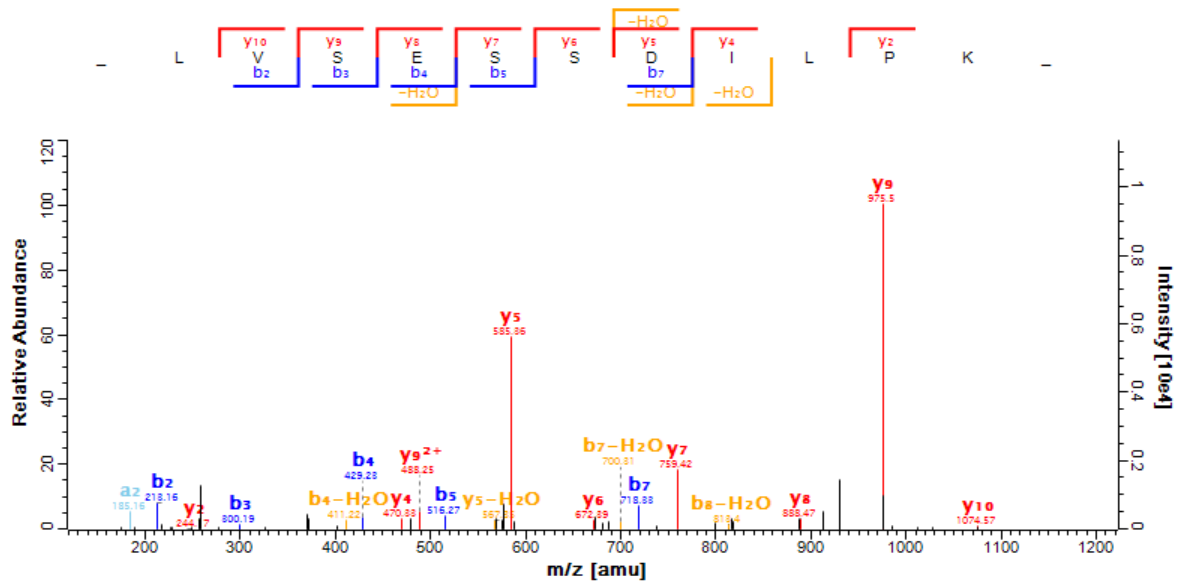

**Protein Group ID:** 417  
**Protein Accession Numbers:** CON\_\_O95678; O95678  
**Gene Names:** KRT75  
**Peptide Sequence:** TAAENEFVALK  
**Total Number of Spectra:** 3  
**Number of Replicates (out of 10):** 2  
**Best Match Score:** 146.16  
**Best Match Posterior Error Probability:** 1.39E-05  
**Best Match Spectrum:**

**Scan number** 2640      **Raw file** 20100930-KD-Batch5-Prt-OGE-WT-Frac2  
**Method** ITMS; CID      **Genenames** KRT75

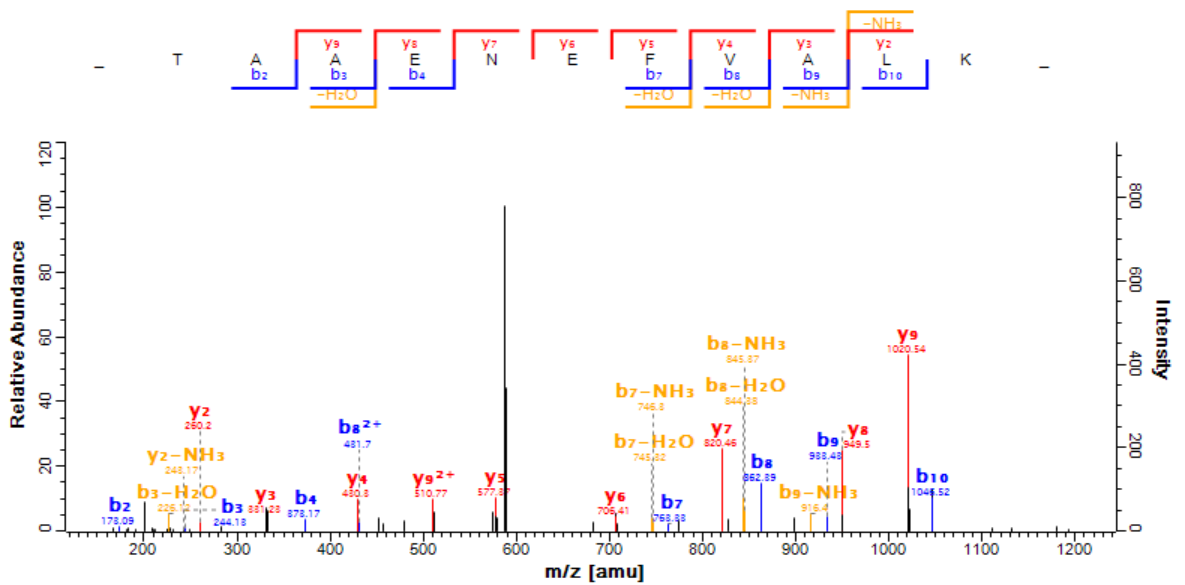

**Protein Group ID:** 418  
**Protein Accession Numbers:** CON\_\_P00711  
**Gene Names:**  
**Peptide Sequence:** VGINYWLAHK  
**Total Number of Spectra:** 9  
**Number of Replicates (out of 10):** 5  
**Best Match Score:** 99.688  
**Best Match Posterior Error Probability:** 0.00057515  
**Best Match Spectrum:**

**Scan number** 3219      **Raw file** 20100930-KD-Batch5-Prt-OGE-WT-Frac5  
**Method** ITMS; CID      **Pepti...** 99.69

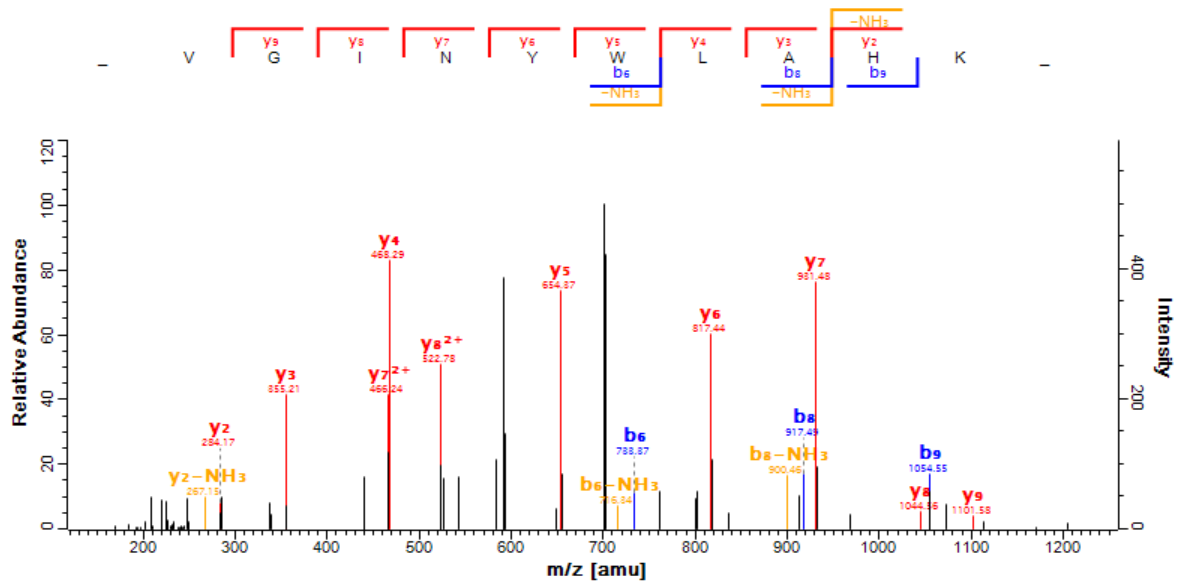

**Protein Group ID:** 420  
**Protein Accession Numbers:** CON\_P00978  
**Gene Names:**  
**Peptide Sequence:** SYIQLWAFDAVK  
**Total Number of Spectra:** 9  
**Number of Replicates (out of 10):** 5  
**Best Match Score:** 139.78  
**Best Match Posterior Error Probability:** 6.76E-05  
**Best Match Spectrum:**

**Scan number** 5662      **Raw file** 20100914-KD-Batch4-Prt-OGE-Mock-Frac4  
**Method** ITMS; CID      **Pepti...** 139.78

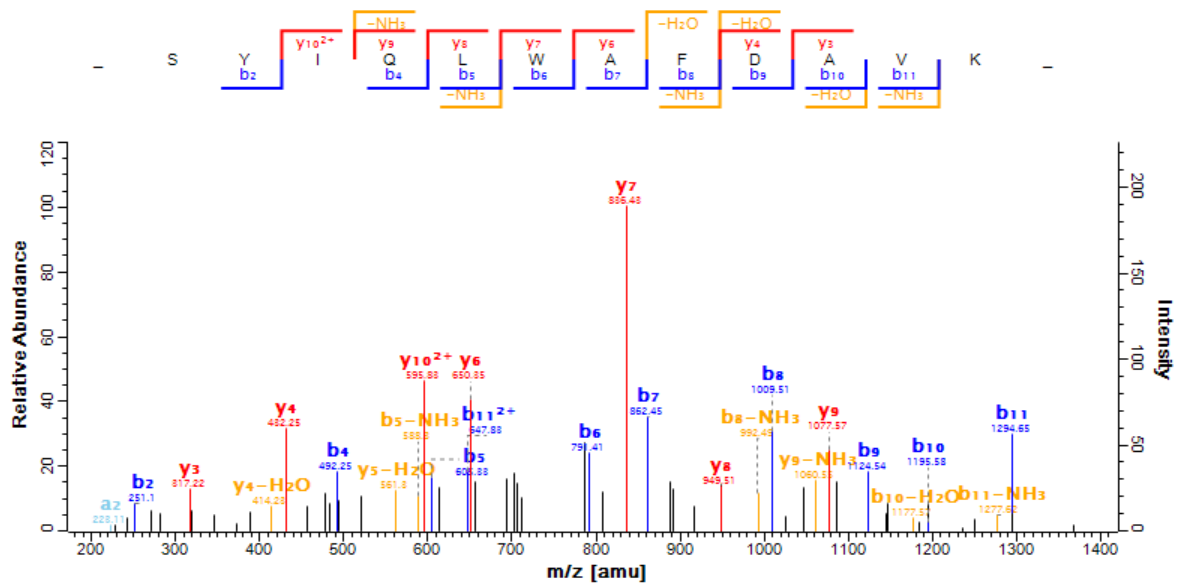

**Protein Group ID:** 424

**Protein Accession Numbers:** CON\_\_P02070

**Gene Names:**

**Peptide Sequence:** EFTPVLQADFQK

**Total Number of Spectra:** 7

**Number of Replicates (out of 10):** 4

**Best Match Score:** 112.83

**Best Match Posterior Error Probability:** 0.00020126

**Best Match Spectrum:**

|                    |           |                 |                 |
|--------------------|-----------|-----------------|-----------------|
| <b>Scan number</b> | 1967      | <b>Raw file</b> | OGE-Mock-Frac20 |
| <b>Method</b>      | ITMS; CID | <b>Pepti...</b> | 112.83          |

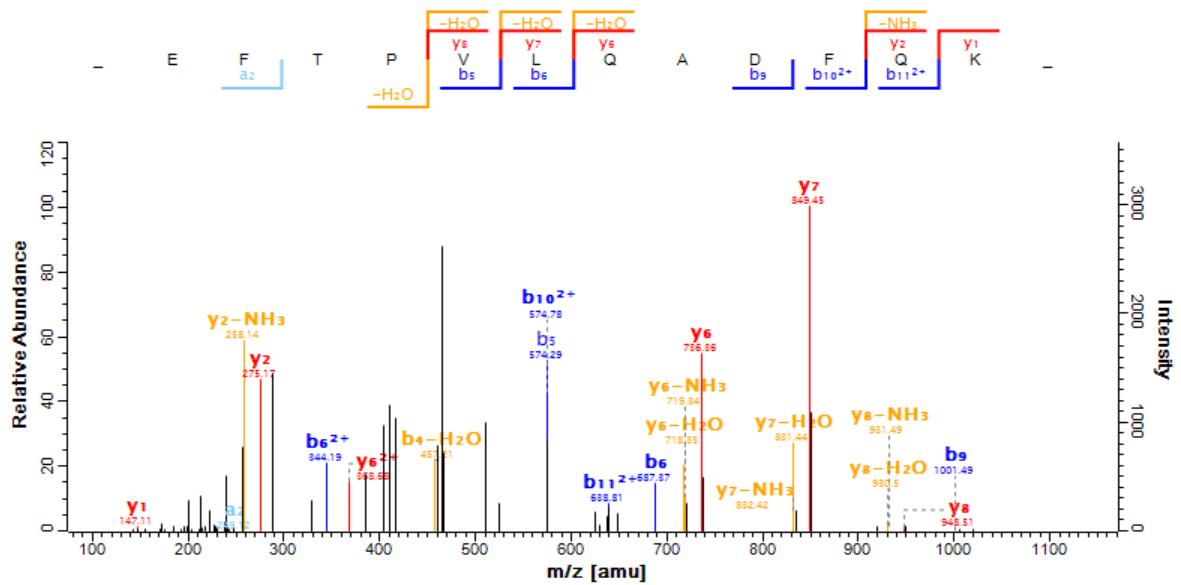

**Protein Group ID:** 427

**Protein Accession Numbers:** CON\_\_P02584

**Gene Names:**

**Peptide Sequence:** D S L L Q D G E F T M D L R

**Total Number of Spectra:** 1

**Number of Replicates (out of 10):** 1

**Best Match Score:** 87.447

**Best Match Posterior Error Probability:** 0.00074949

**Best Match Spectrum:**

**Scan number** 4642      **Raw file** OGE-WT-Frac3  
**Method** ITMS; CID      **Pepti...** 87.45

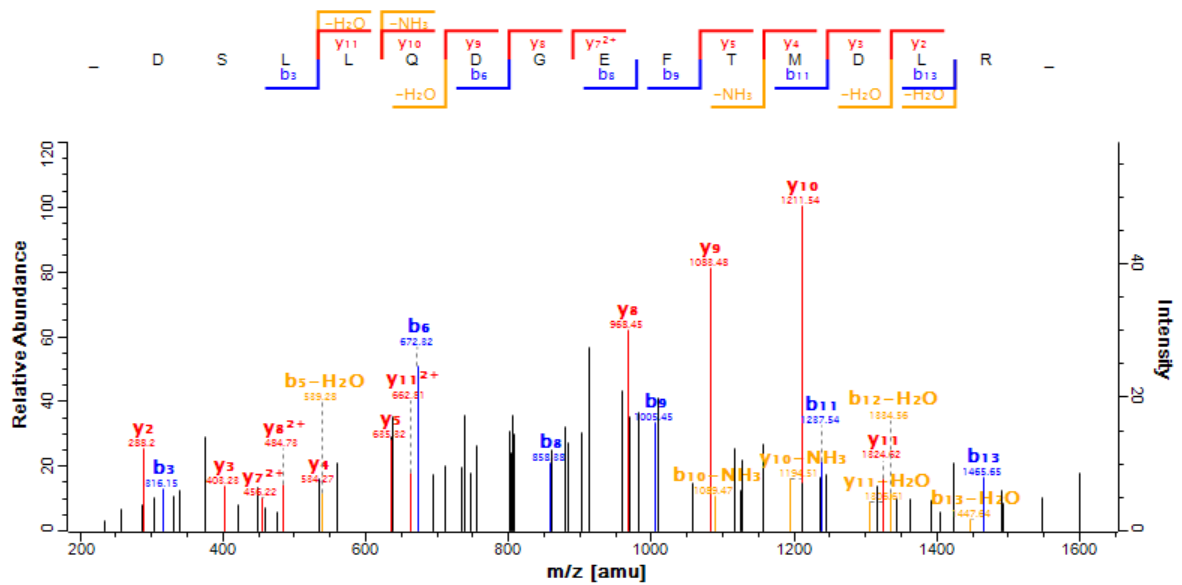

**Protein Group ID:** 435  
**Protein Accession Numbers:** CON\_\_P04259  
**Gene Names:**  
**Peptide Sequence:** ATGGGLSSVGGGSSTIK  
**Total Number of Spectra:** 3  
**Number of Replicates (out of 10):** 2  
**Best Match Score:** 109.36  
**Best Match Posterior Error Probability:** 0.00015606  
**Best Match Spectrum:**

**Scan number** 1628      **Raw file** 20100930-KD-Batch5-Prt-OGE-WT-Frac2  
**Method** ITMS; CID      **Pepti...** 109.36

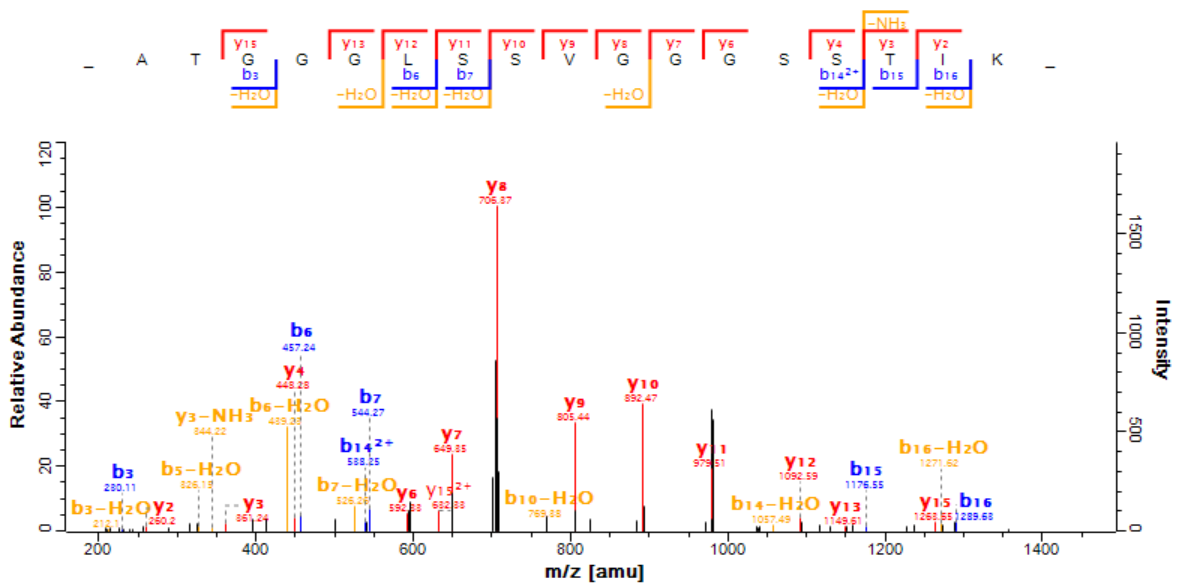



**Protein Group ID:** 438

**Protein Accession Numbers:** E7EQ64; CON\_\_P07477; P07477; H0Y8D1

**Gene Names:** PRSS1

**Peptide Sequence:** TLNNDIMLIK

**Total Number of Spectra:** 357

**Number of Replicates (out of 10):** 10

**Best Match Score:** 179.57

**Best Match Posterior Error Probability:** 1.46E-92

**Best Match Spectrum:**

**Scan number** 2955      **Raw file** Prt-OGE-Batch2-WT-Frac20  
**Method** ITMS; CID      **Genenames** PRSS1

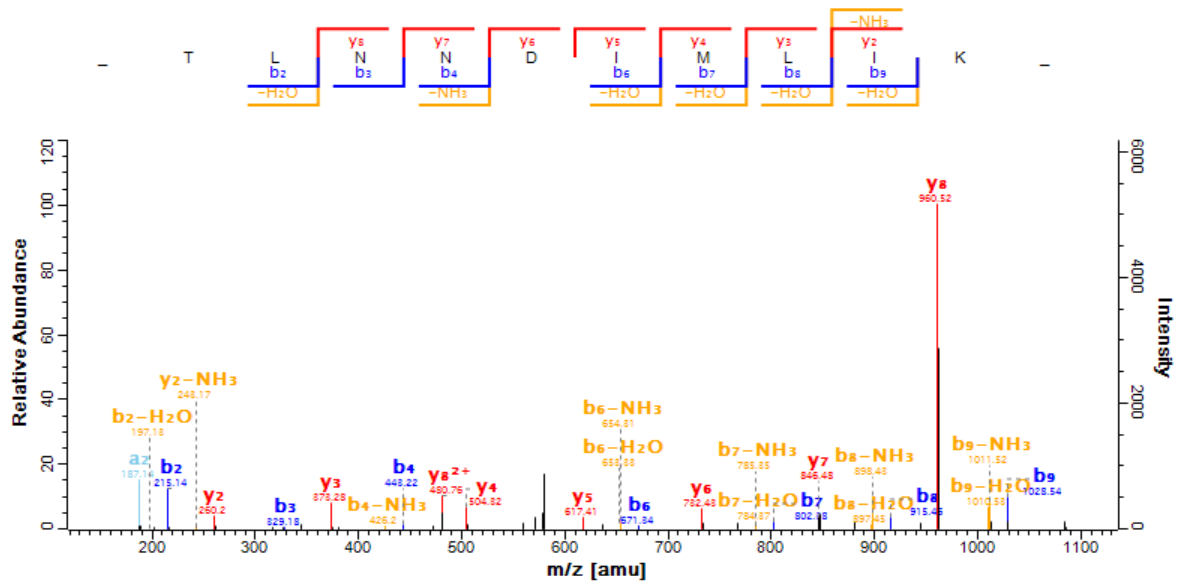

**Protein Group ID:** 439

**Protein Accession Numbers:** CON\_\_P07744

**Gene Names:**

**Peptide Sequence:** AQYEDIAR

**Total Number of Spectra:** 87

**Number of Replicates (out of 10):** 10

**Best Match Score:** 166.52

**Best Match Posterior Error Probability:** 0.00027213

**Best Match Spectrum:**

**Scan number** 1157      **Raw file** 20100914-KD-Batch4-Prt-OGE-Mock-Frac9  
**Method** ITMS; CID      **Pepti...** 166.52

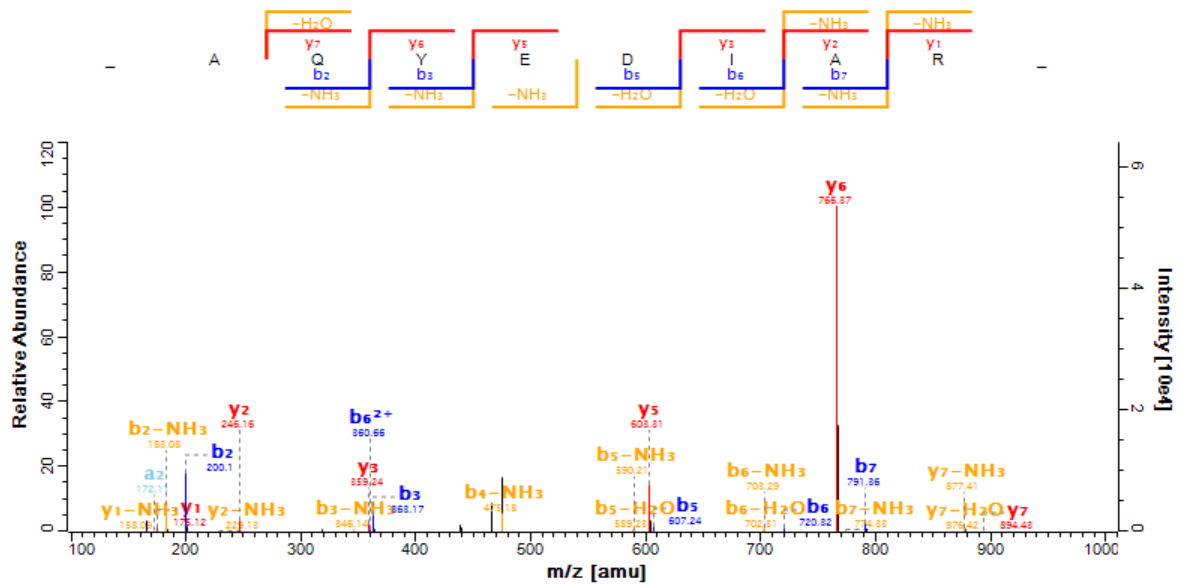

**Protein Group ID:** 447  
**Protein Accession Numbers:** CON\_\_P19001  
**Gene Names:**  
**Peptide Sequence:** ALEQANGELEVK  
**Total Number of Spectra:** 2  
**Number of Replicates (out of 10):** 2  
**Best Match Score:** 84.892  
**Best Match Posterior Error Probability:** 0.014453  
**Best Match Spectrum:**

**Scan number** 1497      **Raw file** 20100914-KD-Batch4-Prt-OGE-Mock-Frac24  
**Method** ITMS; CID      **Pepti...** 84.89

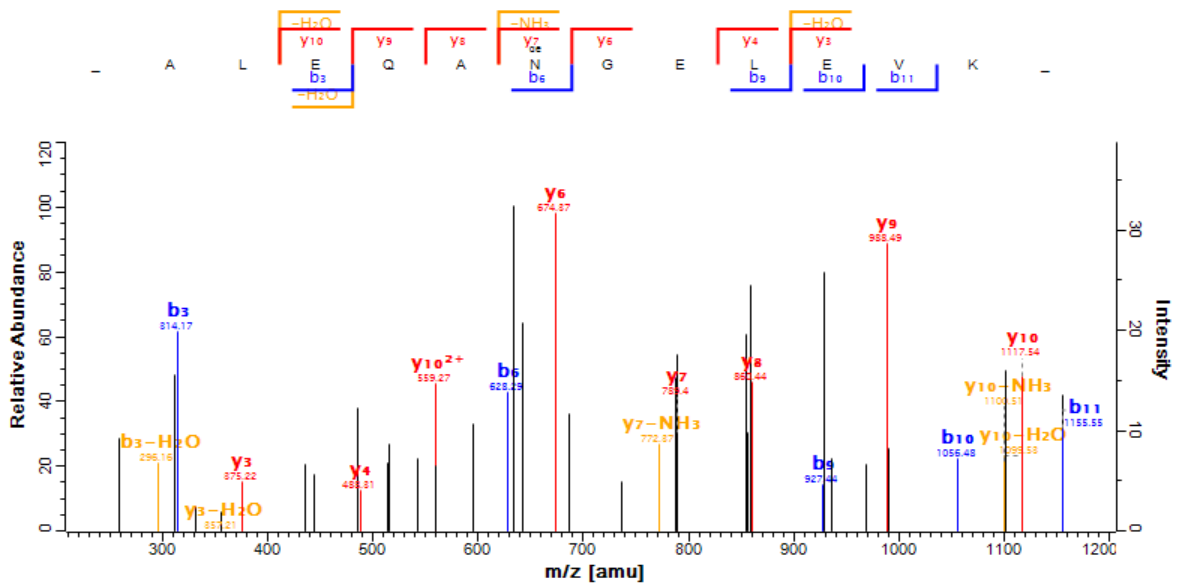

**Protein Group ID:** 454

**Protein Accession Numbers:** CON\_\_P60712; P60709; E7EVS6; G5E9R0; C9JZR7; C9JUM1; C9JTX5

**Gene Names:** ACTB

**Peptide Sequence:** DDDIAALVVDNGSGMCK

**Total Number of Spectra:** 181

**Number of Replicates (out of 10):** 8

**Best Match Score:** 279.44

**Best Match Posterior Error Probability:** 1.18E-138

**Best Match Spectrum:**

|                    |           |                  |                                       |
|--------------------|-----------|------------------|---------------------------------------|
| <b>Scan number</b> | 5130      | <b>Raw file</b>  | 20100917-KD-Batch5-Prt-OGE-Mock-Frac8 |
| <b>Method</b>      | ITMS: CID | <b>Genenames</b> | ACTB                                  |

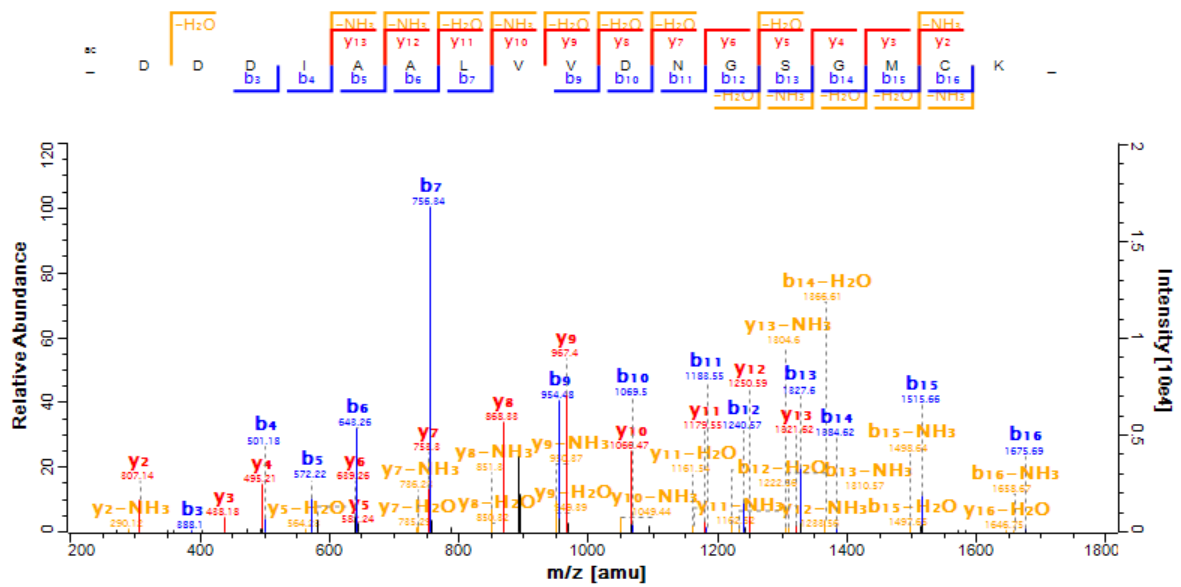

**Protein Group ID:** 456  
**Protein Accession Numbers:** CON\_\_P81644  
**Gene Names:**  
**Peptide Sequence:** AGTDLLNFLSSFIDPK  
**Total Number of Spectra:** 1  
**Number of Replicates (out of 10):** 1  
**Best Match Score:** 121.32  
**Best Match Posterior Error Probability:** 0.00010141  
**Best Match Spectrum:**

**Scan number** 7773      **Raw file** OGE-Mock-Frac4  
**Method** ITMS; CID      **Pepti...** 121.32

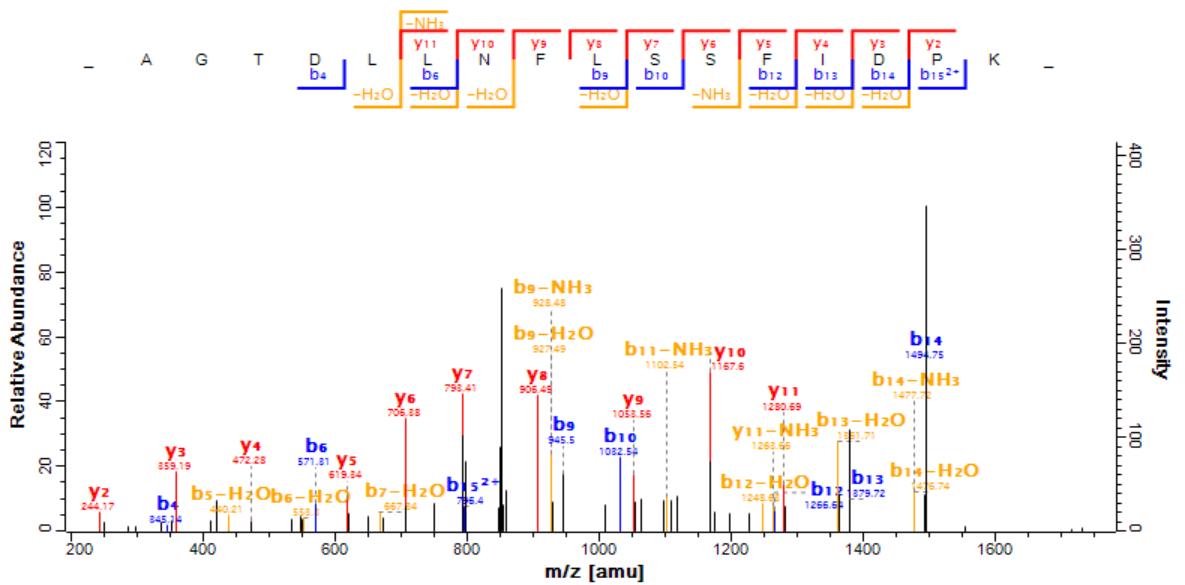

**Protein Group ID:** 463  
**Protein Accession Numbers:** CON\_Q1RMN8  
**Gene Names:**  
**Peptide Sequence:** YAASSYLSLTSSDWK  
**Total Number of Spectra:** 3  
**Number of Replicates (out of 10):** 1  
**Best Match Score:** 96.673  
**Best Match Posterior Error Probability:** 0.0001635  
**Best Match Spectrum:**

**Scan number** 4338      **Raw file** 20100914-KD-Batch4-Prt-OGE-Mock-Frac5  
**Method** ITMS; CID      **Pepti...** 96.67

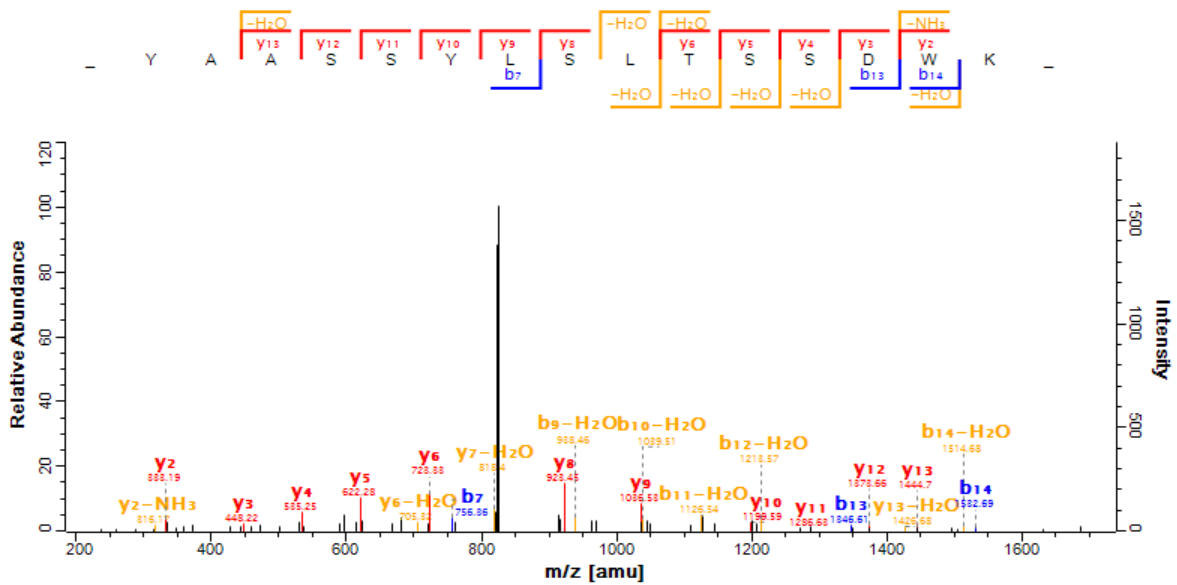

**Protein Group ID:** 466  
**Protein Accession Numbers:** CON\_Q2KJ62  
**Gene Names:**  
**Peptide Sequence:** VYPTVNCQLGQTSLMK  
**Total Number of Spectra:** 3  
**Number of Replicates (out of 10):** 2  
**Best Match Score:** 171.78  
**Best Match Posterior Error Probability:** 6.62E-16  
**Best Match Spectrum:**

**Scan number** 3720      **Raw file** 20100930-KD-Batch5-Prt-OGE-WT-Frac4  
**Method** ITMS; CID      **Pepti...** 171.78

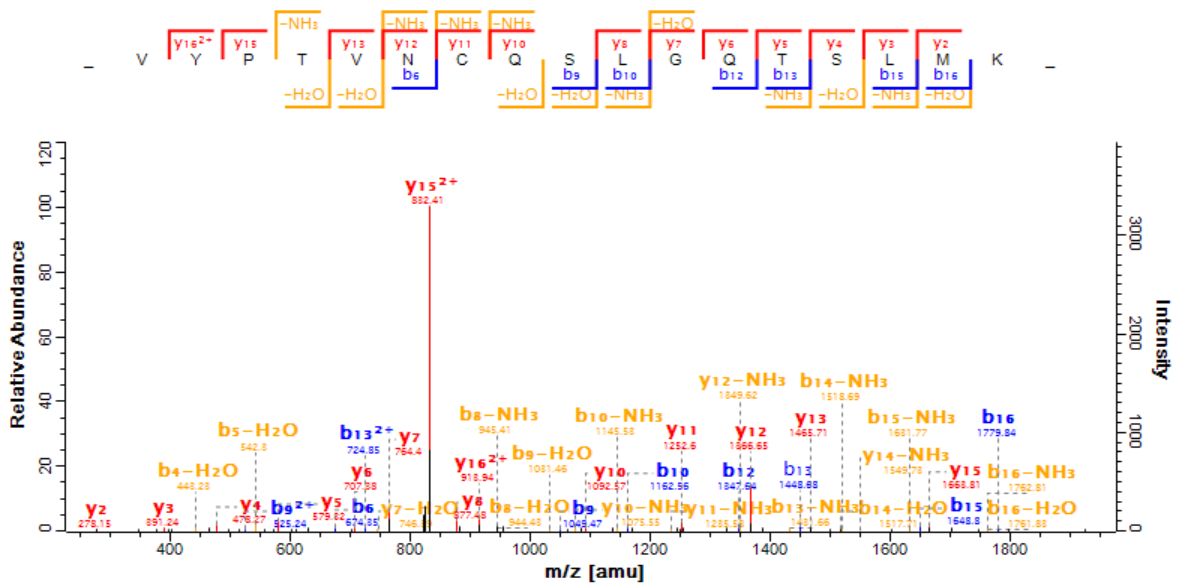

**Protein Group ID:** 470  
**Protein Accession Numbers:** CON\_Q3KUS7  
**Gene Names:**  
**Peptide Sequence:** LQGMENLEDVVFVQMLDESR  
**Total Number of Spectra:** 1  
**Number of Replicates (out of 10):** 1  
**Best Match Score:** 129.05  
**Best Match Posterior Error Probability:** 6.53E-06  
**Best Match Spectrum:**

**Scan number** 6771      **Raw file** OGE-WT-Frac14  
**Method** ITMS; CID      **Pepti...** 129.05

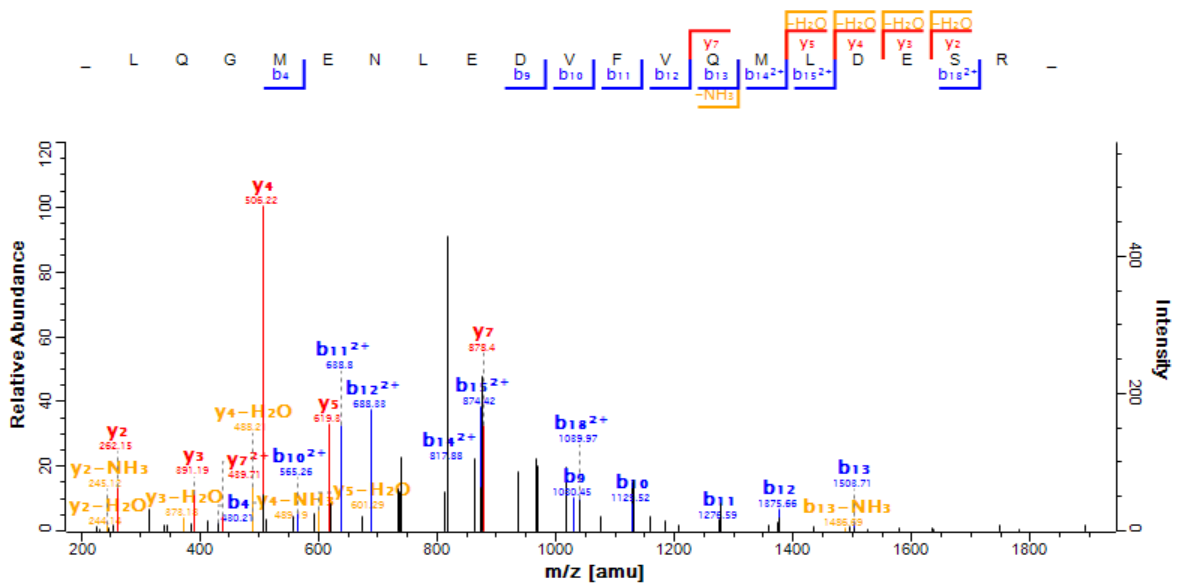



**Protein Group ID:** 472  
**Protein Accession Numbers:** CON\_Q3MHN5  
**Gene Names:**  
**Peptide Sequence:** ELSSFIQK  
**Total Number of Spectra:** 7  
**Number of Replicates (out of 10):** 5  
**Best Match Score:** 132.57  
**Best Match Posterior Error Probability:** 0.001564  
**Best Match Spectrum:**

**Scan number** 2699      **Raw file** OGE-WT-Frac6  
**Method** ITMS; CID      **Pepti...** 132.57

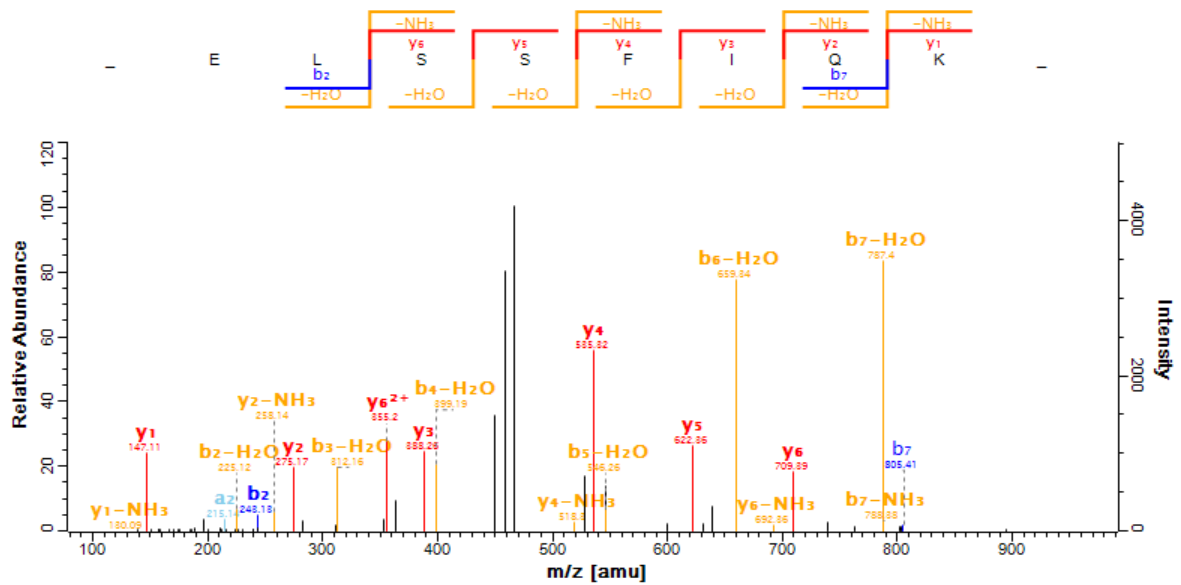

**Protein Group ID:** 482

**Protein Accession Numbers:** CON\_Q5D862; Q5D862

**Gene Names:** FLG2

**Peptide Sequence:** SVVTVIDVFYK

**Total Number of Spectra:** 1

**Number of Replicates (out of 10):** 1

**Best Match Score:** 100.93

**Best Match Posterior Error Probability:** 0.00025588

**Best Match Spectrum:**

|                    |           |                  |                                        |
|--------------------|-----------|------------------|----------------------------------------|
| <b>Scan number</b> | 4098      | <b>Raw file</b>  | 20100917-KD-Batch5-Prt-OGE-Mock-Frac24 |
| <b>Method</b>      | ITMS; CID | <b>Genenames</b> | FLG2                                   |

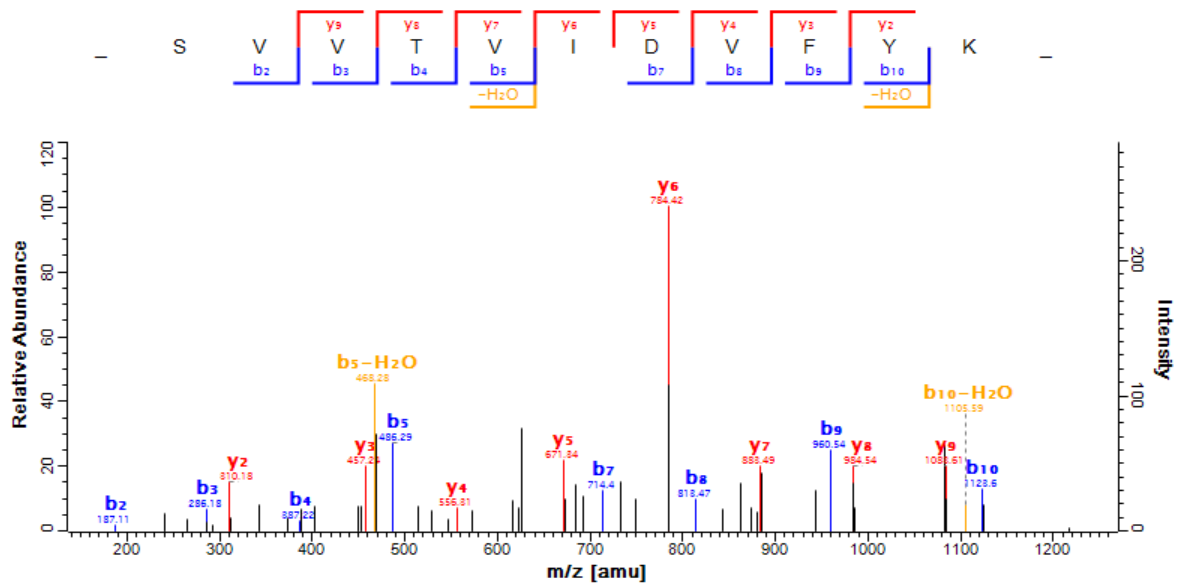

**Protein Group ID:** 483

**Protein Accession Numbers:** CON\_Q5XKE5; Q5XKE5

**Gene Names:** KRT79

**Peptide Sequence:** YEELQVTAGK

**Total Number of Spectra:** 103

**Number of Replicates (out of 10):** 9

**Best Match Score:** 149.72

**Best Match Posterior Error Probability:** 5.81E-05

**Best Match Spectrum:**

**Scan number** 3076      **Raw file** OGE-Mock-Frac9  
**Method** ITMS; CID      **Genenames** KRT79

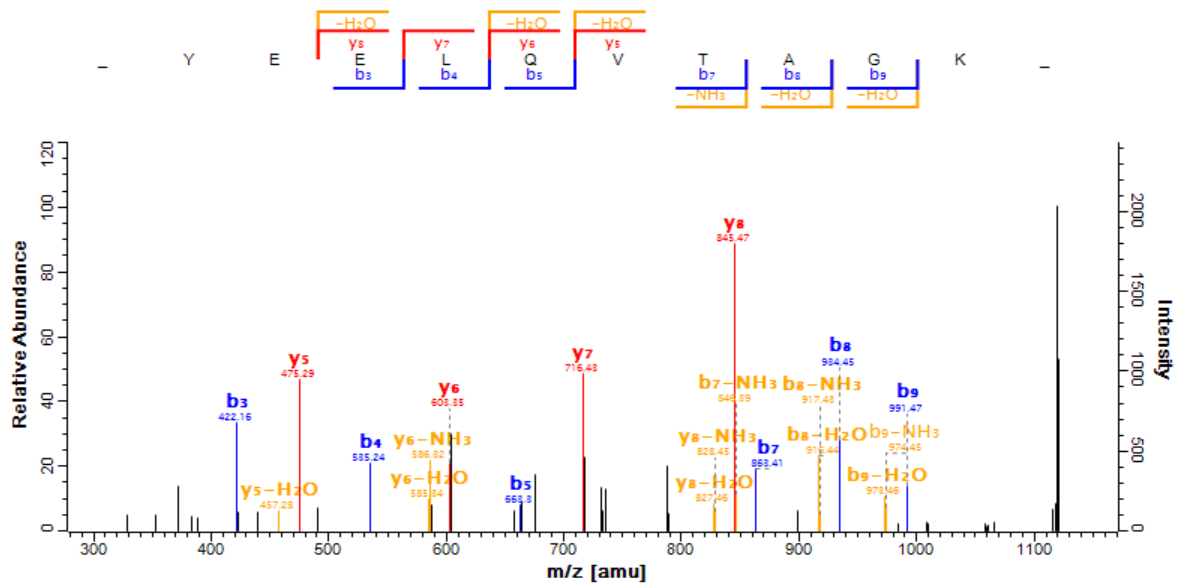

**Protein Group ID:** 484  
**Protein Accession Numbers:** CON\_Q6IFZ6  
**Gene Names:**  
**Peptide Sequence:** WELLQQVNTSTR  
**Total Number of Spectra:** 116  
**Number of Replicates (out of 10):** 10  
**Best Match Score:** 234.82  
**Best Match Posterior Error Probability:** 2.39E-53  
**Best Match Spectrum:**

**Scan number** 4024      **Raw file** OGE-WT-Frac21  
**Method** ITMS; CID      **Pepti...** 234.82

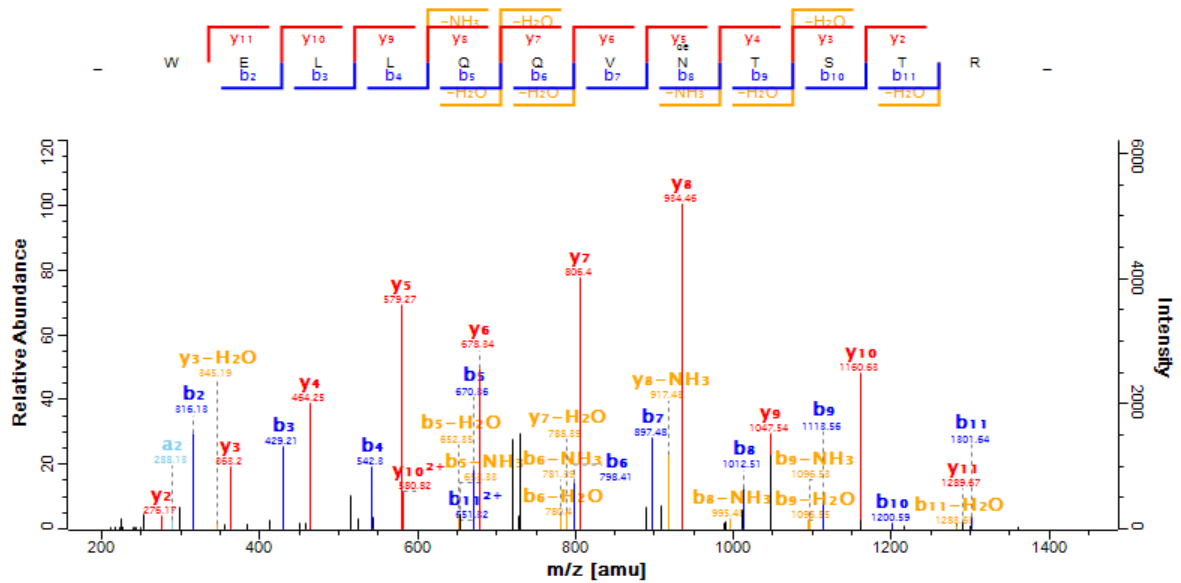

**Protein Group ID:** 486

**Protein Accession Numbers:** CON\_Q7RTT2; CON\_Q8N1N4-2; Q8N1N4; Q8N1N4-2; F8VS93

**Gene Names:** KRT78

**Peptide Sequence:** YLDFSSIITEVR

**Total Number of Spectra:** 1

**Number of Replicates (out of 10):** 1

**Best Match Score:** 98.105

**Best Match Posterior Error Probability:** 0.00048775

**Best Match Spectrum:**

**Scan number** 4383      **Raw file** 20100917-KD-Batch5-Prt-OGE-Mock-Frac24  
**Method** ITMS: CID      **Genenames** KRT78

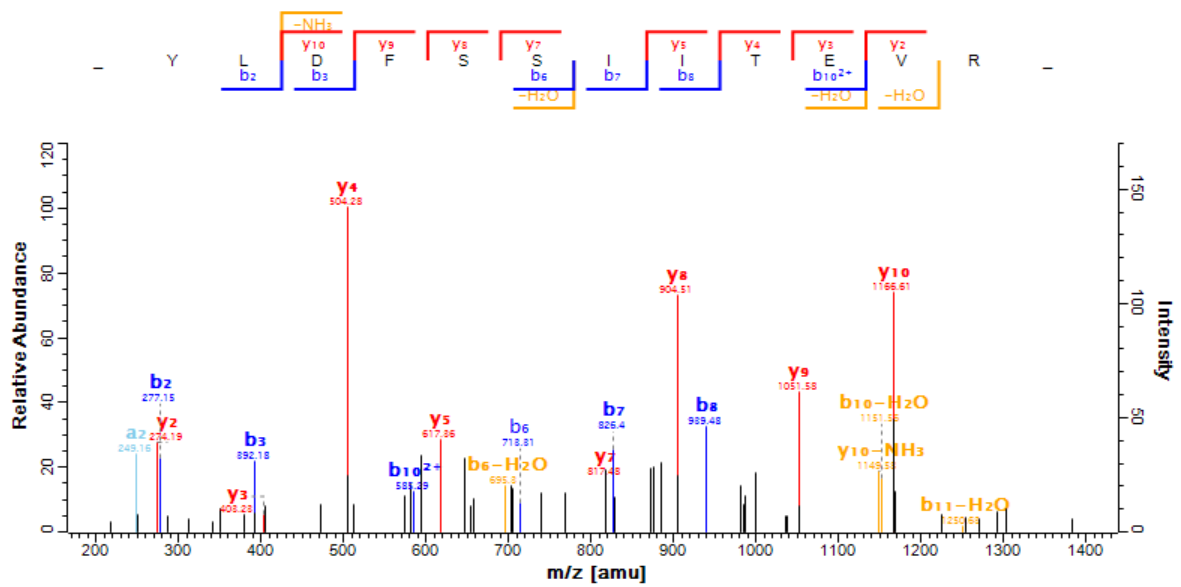

**Protein Group ID:** 488  
**Protein Accession Numbers:** CON\_Q8BGZ7  
**Gene Names:**  
**Peptide Sequence:** NMQEVVEDFK  
**Total Number of Spectra:** 1  
**Number of Replicates (out of 10):** 1  
**Best Match Score:** 77.64  
**Best Match Posterior Error Probability:** 0.0034194  
**Best Match Spectrum:**

**Scan number** 3927      **Raw file** 20100930-KD-Batch5-Prt-OGE-WT-Frac2  
**Method** ITMS; CID      **Pepti...** 77.64

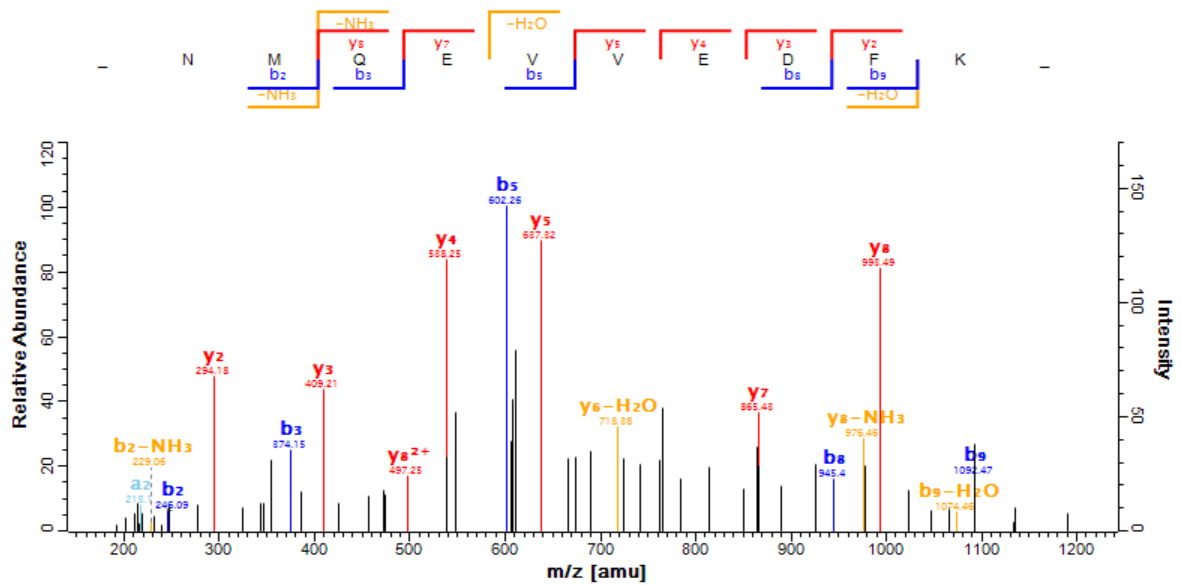

**Protein Group ID:** 489

**Protein Accession Numbers:** Q9BYR0; CON\_\_Q9BYQ5; Q9BQ66; Q9BYQ5; I3L475; Q9BYR2

**Gene Names:** KRTAP4-7;KRTAP4-12;KRTAP4-6;KRTAP4-5

**Peptide Sequence:** PTCVISTCPR

**Total Number of Spectra:** 3

**Number of Replicates (out of 10):** 2

**Best Match Score:** 114.89

**Best Match Posterior Error Probability:** 0.00021656

**Best Match Spectrum:**

|                    |           |                  |                                      |
|--------------------|-----------|------------------|--------------------------------------|
| <b>Scan number</b> | 1224      | <b>Raw file</b>  | 20100927-KD-Batch4-Prt-OGE-WT-Frac3  |
| <b>Method</b>      | ITMS: CID | <b>Genenames</b> | KRTAP4-7;KRTAP4-12;KRTAP4-6;KRTAP4-5 |

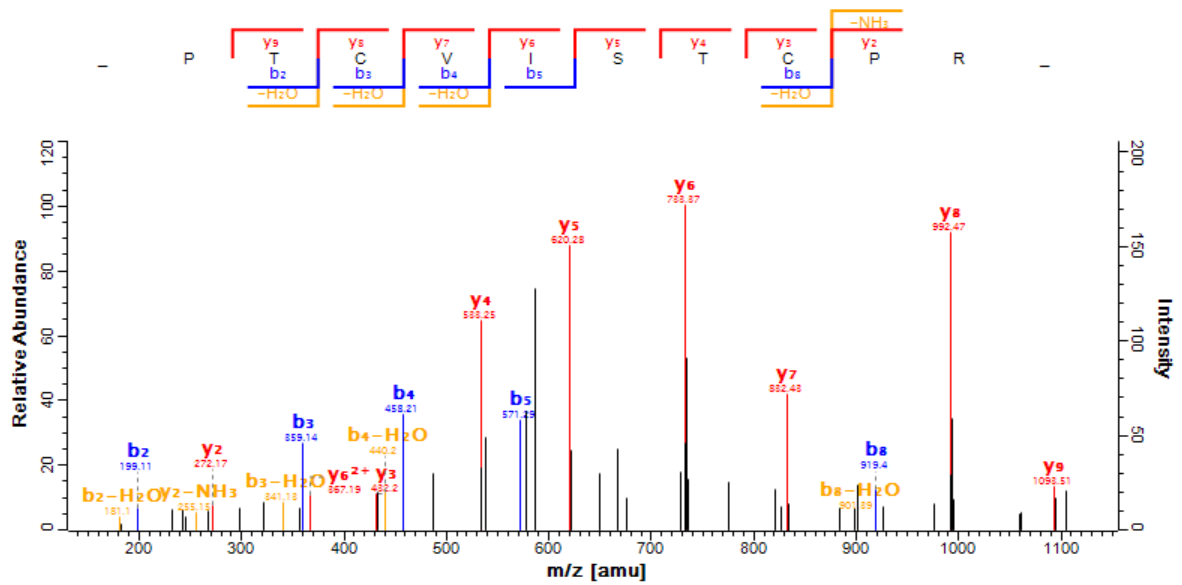

**Protein Group ID:** 490

**Protein Accession Numbers:** CON\_Q9BYR8; Q9BYR8

**Gene Names:** KRTAP3-1

**Peptide Sequence:** SCSVPTGPATTFCSFDK

**Total Number of Spectra:** 6

**Number of Replicates (out of 10):** 2

**Best Match Score:** 117.2

**Best Match Posterior Error Probability:** 0.00014114

**Best Match Spectrum:**

|                    |           |                  |                                     |
|--------------------|-----------|------------------|-------------------------------------|
| <b>Scan number</b> | 3430      | <b>Raw file</b>  | 20100930-KD-Batch5-Prt-OGE-WT-Frac2 |
| <b>Method</b>      | ITMS; CID | <b>Genenames</b> | KRTAP3-1                            |

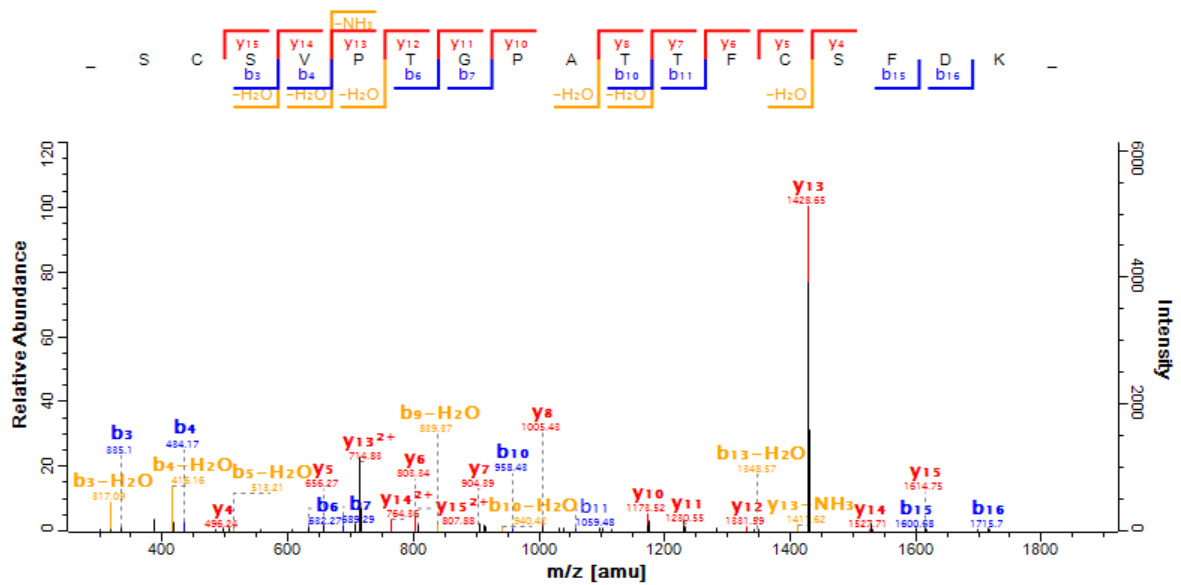



**Protein Group ID:** 493

**Protein Accession Numbers:** CON\_Q9QWL7; K7EPJ9

**Gene Names:**

**Peptide Sequence:** ALEEANTELEVK

**Total Number of Spectra:** 3

**Number of Replicates (out of 10):** 3

**Best Match Score:** 104.24

**Best Match Posterior Error Probability:** 0.00030161

**Best Match Spectrum:**

**Scan number** 2079      **Raw file** Prt-OGE-Batch2-WT-Frac5  
**Method** ITMS; CID      **Pepti...** 104.24

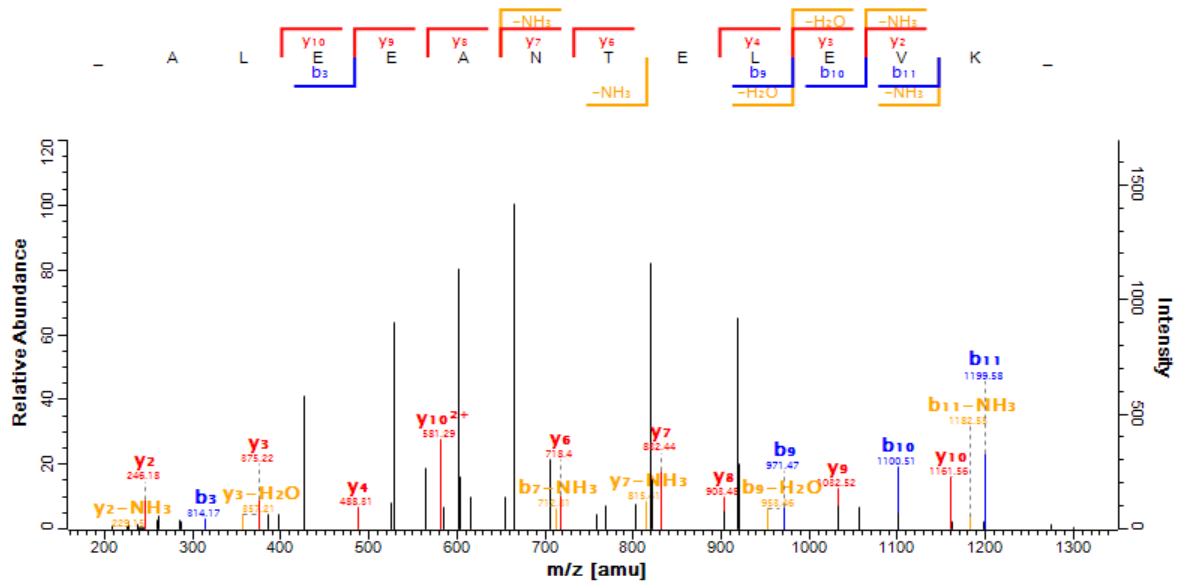

**Protein Group ID:** 501  
**Protein Accession Numbers:** Q8IVL5; D3DNV8  
**Gene Names:** LEPREL1  
**Peptide Sequence:** VPSGVNVEGAVGVHSGMK  
**Total Number of Spectra:** 1  
**Number of Replicates (out of 10):** 1  
**Best Match Score:** 126.63  
**Best Match Posterior Error Probability:** 1.14E-05  
**Best Match Spectrum:**

**Scan number** 3185      **Raw file** Prt-OGE-Batch3-WT-Frac10  
**Method** ITMS; CID      **Genenames** LEPREL1

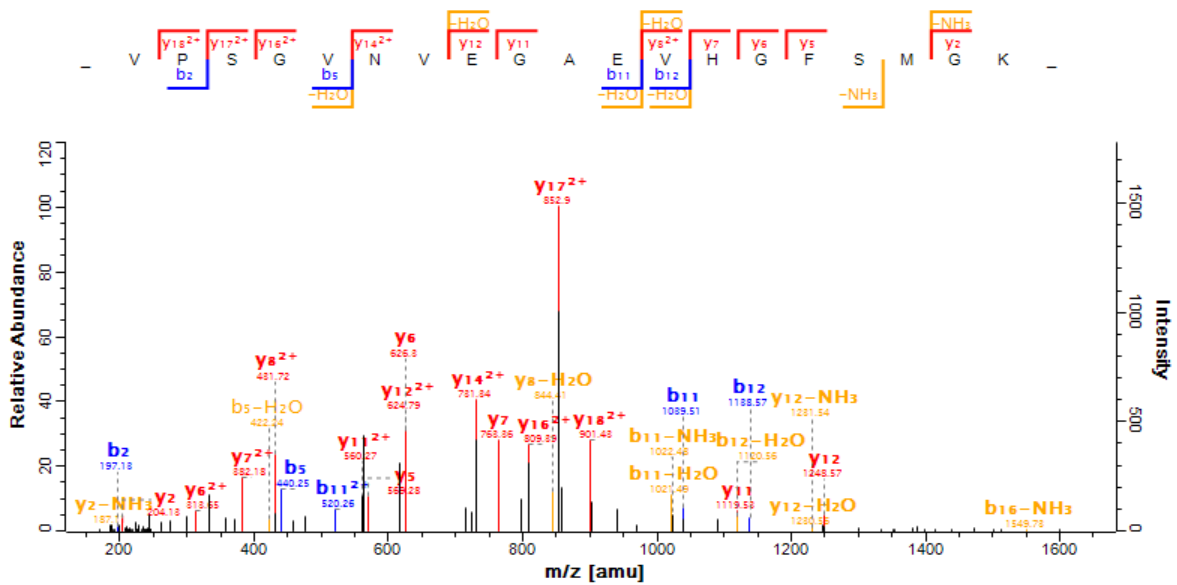

**Protein Group ID:** 508

**Protein Accession Numbers:** Q9BUT1; Q9BUT1-2; D6RIR6; D6R9U8; D6RFG2; D6RBF6

**Gene Names:** BDH2

**Peptide Sequence:** VIILTAAQGIGQAAALAFAR

**Total Number of Spectra:** 8

**Number of Replicates (out of 10):** 7

**Best Match Score:** 143.83

**Best Match Posterior Error Probability:** 2.66E-13

**Best Match Spectrum:**

**Scan number** 7026      **Raw file** 20100914-KD-Batch4-Prt-OGE-Mock-Frac18  
**Method** ITMS; CID      **Genenames** BDH2

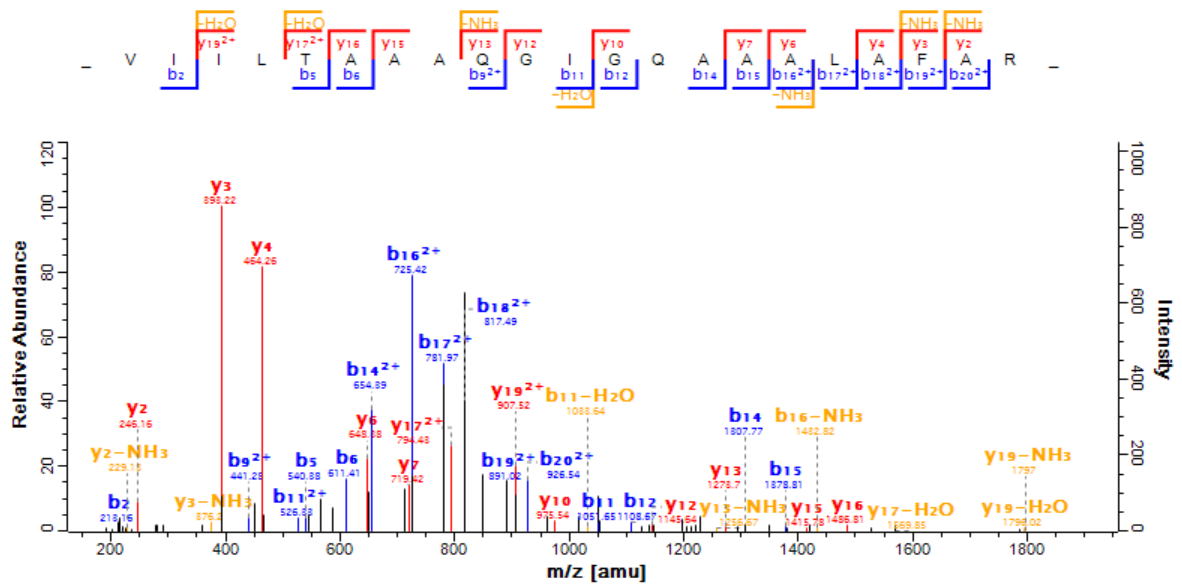

**Protein Group ID:** 511

**Protein Accession Numbers:** Q8WUP2-2; Q8WUP2; Q8WUP2-3; E7EN81; E7EWE8; E7EPI5; D6RAI6

**Gene Names:** FBLIM1

**Peptide Sequence:** TPEAGLAGRSPWTTTTPGR

**Total Number of Spectra:** 5

**Number of Replicates (out of 10):** 3

**Best Match Score:** 107.74

**Best Match Posterior Error Probability:** 0.00044295

**Best Match Spectrum:**

|                    |           |                  |                          |
|--------------------|-----------|------------------|--------------------------|
| <b>Scan number</b> | 2517      | <b>Raw file</b>  | Prt-OGE-Batch3-WT-Frac10 |
| <b>Method</b>      | ITMS; CID | <b>Genenames</b> | FBLIM1                   |

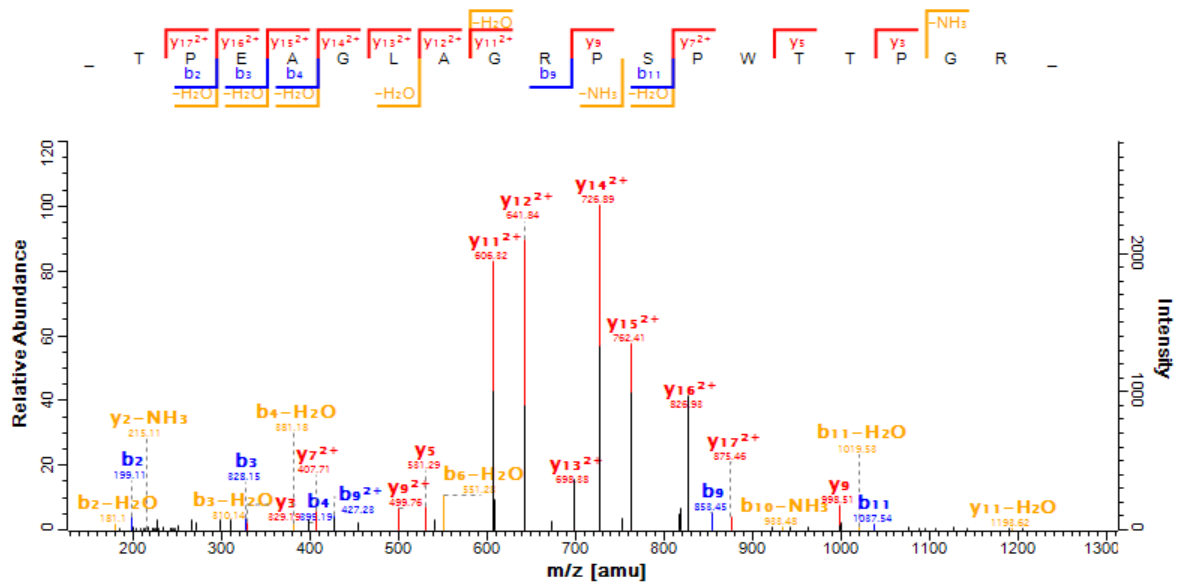

**Protein Group ID:** 513

**Protein Accession Numbers:** Q9NVZ3-2; Q9NVZ3; F6SKB8; Q9NVZ3-3; D6RAN6; H0Y970

**Gene Names:** NECAP2

**Peptide Sequence:** AAEWQLDQPSWSGR

**Total Number of Spectra:** 2

**Number of Replicates (out of 10):** 2

**Best Match Score:** 136.6

**Best Match Posterior Error Probability:** 1.25E-05

**Best Match Spectrum:**

**Scan number** 3307      **Raw file** Prt-OGE-Batch2-WT-Frac18  
**Method** ITMS; CID      **Genenames** NECAP2

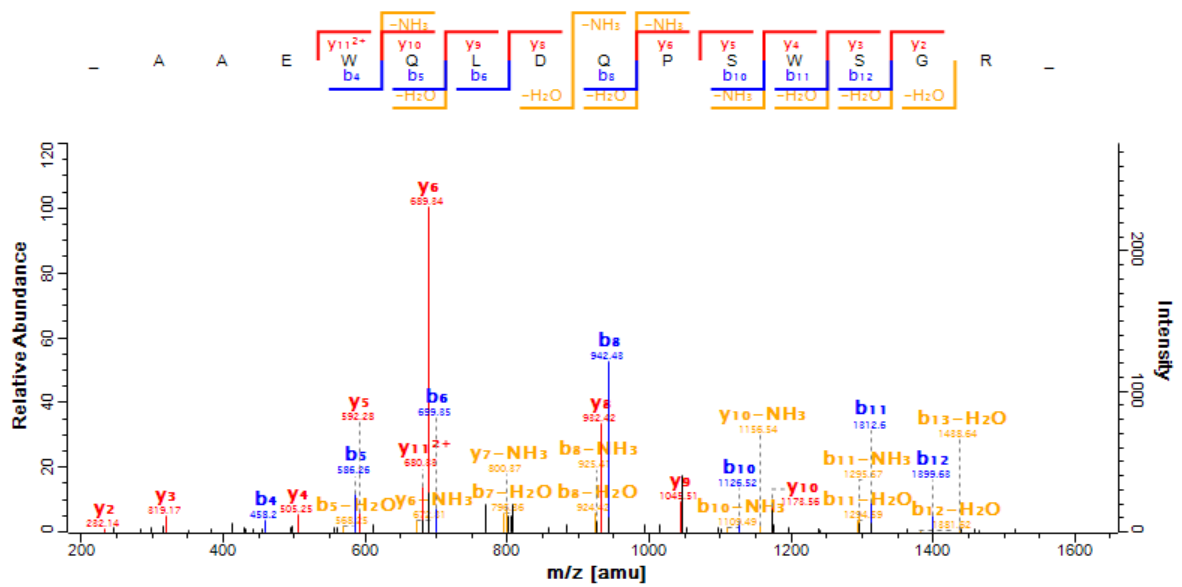

**Protein Group ID:** 514

**Protein Accession Numbers:** Q9H819; D6RB03; D6RCS7

**Gene Names:** DNAJC18

**Peptide Sequence:** NYYEILGVSR

**Total Number of Spectra:** 2

**Number of Replicates (out of 10):** 2

**Best Match Score:** 131.43

**Best Match Posterior Error Probability:** 0.00092552

**Best Match Spectrum:**

|                    |           |                  |                                        |
|--------------------|-----------|------------------|----------------------------------------|
| <b>Scan number</b> | 3794      | <b>Raw file</b>  | 20100917-KD-Batch5-Prt-OGE-Mock-Frac20 |
| <b>Method</b>      | ITMS; CID | <b>Genenames</b> | DNAJC18                                |

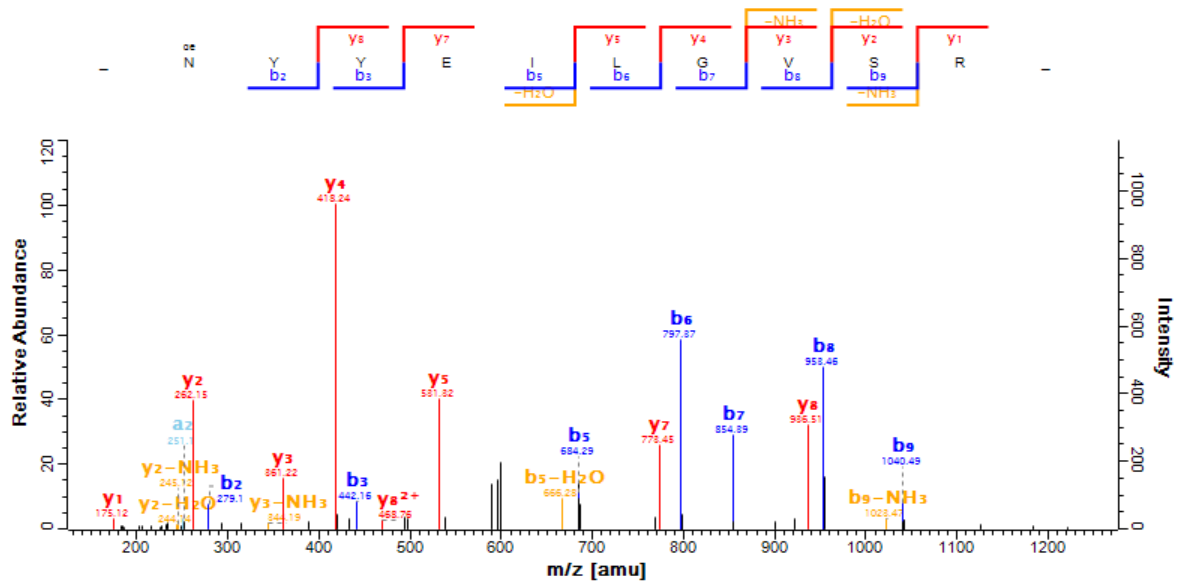

**Protein Group ID:** 515

**Protein Accession Numbers:** Q96H20; Q96H20-2; D6RFY6; D6RJ86; D6RBI1; H0Y8S5

**Gene Names:** SNF8

**Peptide Sequence:** GTVLAEDQLAQMSK

**Total Number of Spectra:** 2

**Number of Replicates (out of 10):** 2

**Best Match Score:** 233.97

**Best Match Posterior Error Probability:** 7.30E-61

**Best Match Spectrum:**

|                    |           |                  |                          |
|--------------------|-----------|------------------|--------------------------|
| <b>Scan number</b> | 2991      | <b>Raw file</b>  | Prt-OGE-Batch2-WT-Frac13 |
| <b>Method</b>      | ITMS; CID | <b>Genenames</b> | SNF8                     |

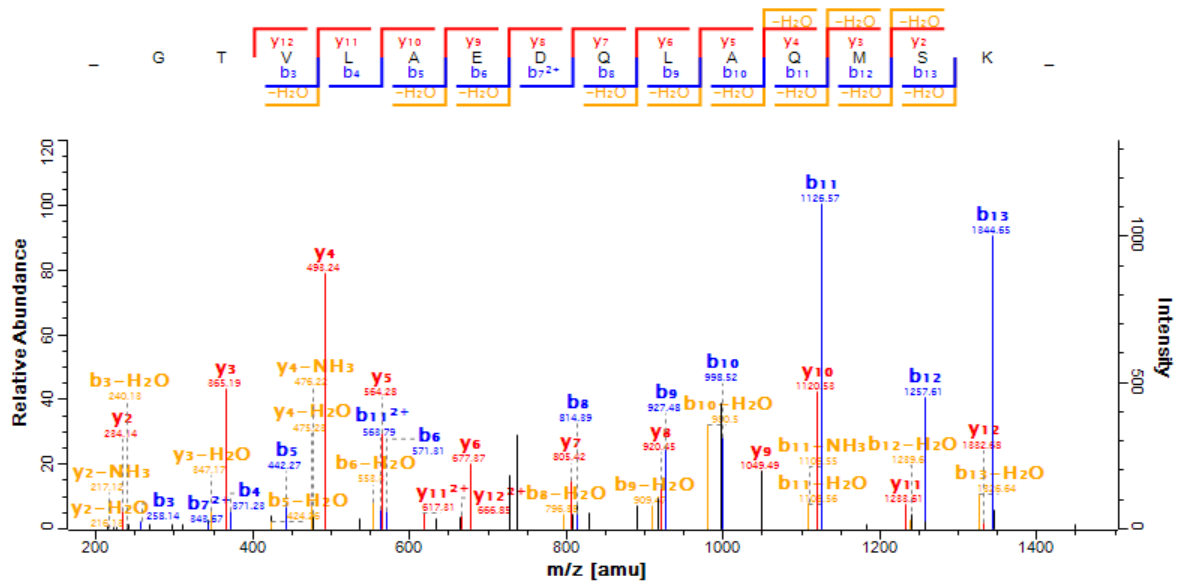

**Protein Group ID:** 521

**Protein Accession Numbers:** Q9Y6B6; D6RD69; Q9H029; D6R9R5

**Gene Names:** SAR1B;DKFZp434B2017

**Peptide Sequence:** EMFGLYGQTTGK

**Total Number of Spectra:** 1

**Number of Replicates (out of 10):** 1

**Best Match Score:** 100.38

**Best Match Posterior Error Probability:** 0.00041889

**Best Match Spectrum:**

|                    |           |                  |                            |
|--------------------|-----------|------------------|----------------------------|
| <b>Scan number</b> | 3813      | <b>Raw file</b>  | Prt-OGE-Batch3-Mock-Frac11 |
| <b>Method</b>      | ITMS; CID | <b>Genenames</b> | SAR1B;DKFZp434B2017        |

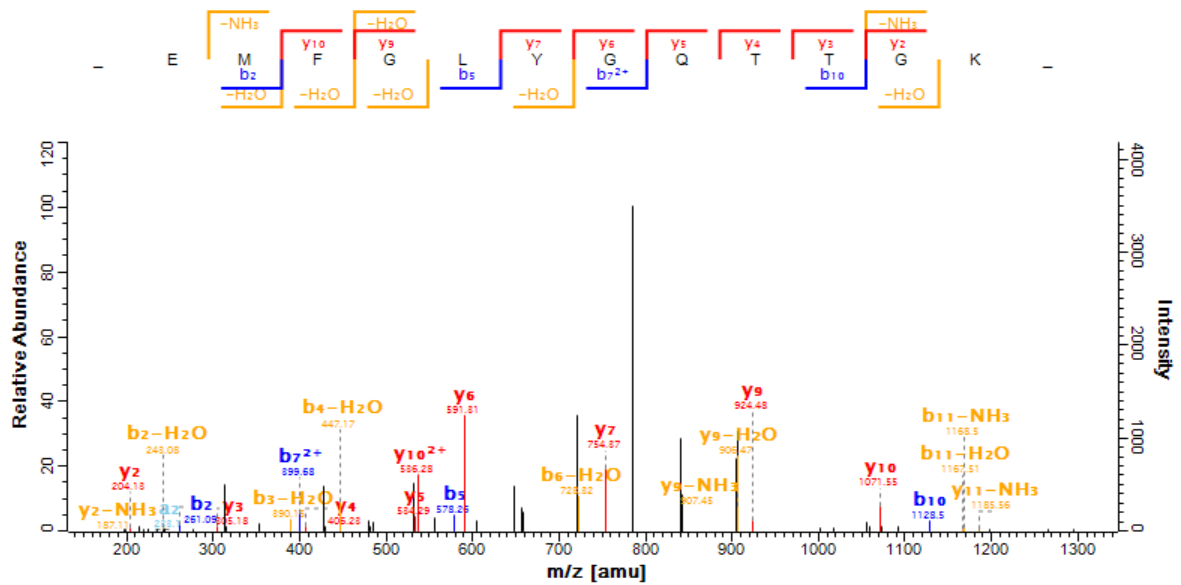



**Protein Group ID:** 523

**Protein Accession Numbers:** F6VM53; Q96S19; F6TF62; H3BNB2; Q96S19-2; H3BRT2; D6REA6; Q96S19-3; H3BS73

**Gene Names:** C16orf13

**Peptide Sequence:** NKDPILHVLR

**Total Number of Spectra:** 3

**Number of Replicates (out of 10):** 3

**Best Match Score:** 108.43

**Best Match Posterior Error Probability:** 0.0011706

**Best Match Spectrum:**

Scan number 1720 Raw file Prt-OGE-Batch3-Mock-Frac17  
Method ITMS: CID Genenames C16orf13

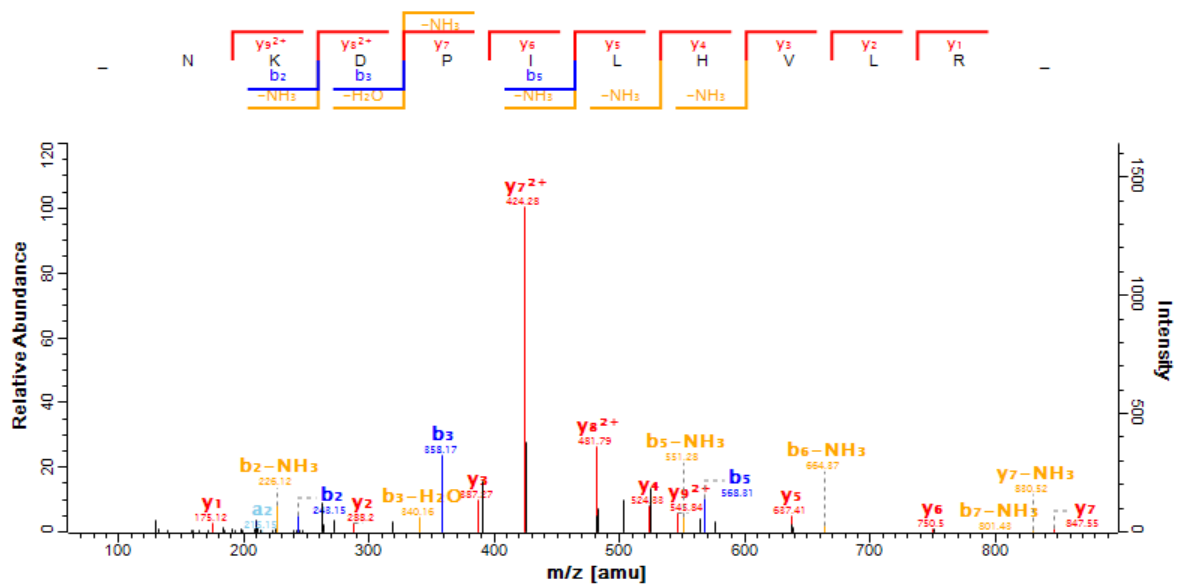

**Protein Group ID:** 524

**Protein Accession Numbers:** Q6UX04; Q6UX04-2; D6REK3

**Gene Names:** CWC27

**Peptide Sequence:** NFSLLSFGEEAEVEEVEVNR

**Total Number of Spectra:** 1

**Number of Replicates (out of 10):** 1

**Best Match Score:** 140.32

**Best Match Posterior Error Probability:** 7.93E-09

**Best Match Spectrum:**

**Scan number** 6528      **Raw file** Prt-OGE-Batch3--Mock-Frac11  
**Method** ITMS; CID      **Genenames** CWC27

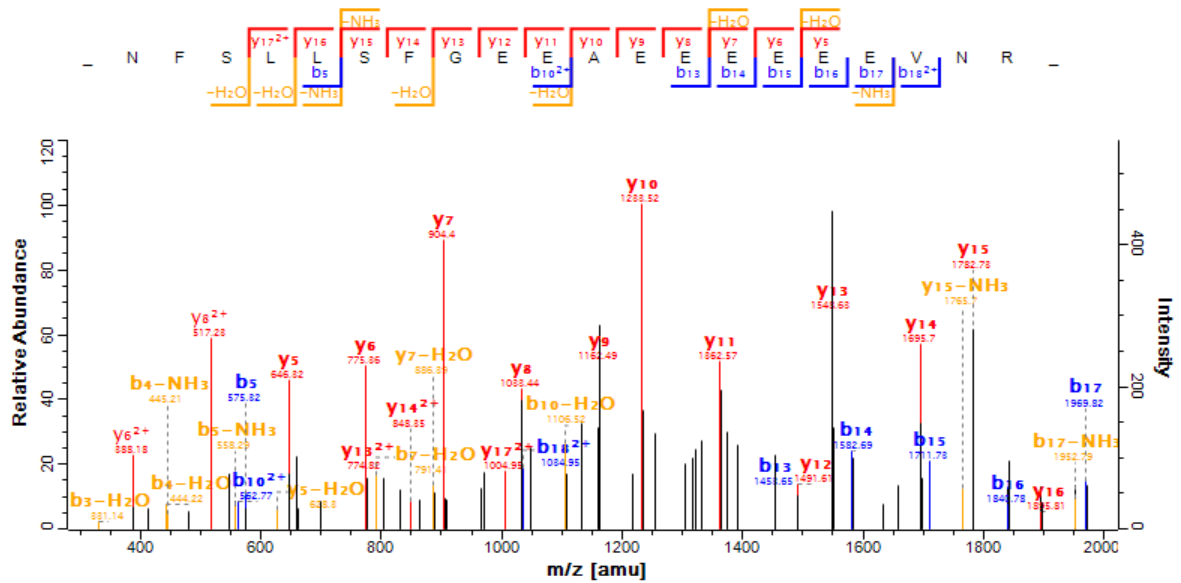

**Protein Group ID:** 525  
**Protein Accession Numbers:** P02675; D6REL8  
**Gene Names:** FGB  
**Peptide Sequence:** MGPTELLIEMEDWK  
**Total Number of Spectra:** 5  
**Number of Replicates (out of 10):** 4  
**Best Match Score:** 210.91  
**Best Match Posterior Error Probability:** 4.34E-37  
**Best Match Spectrum:**

**Scan number** 5581      **Raw file** Prt-OGE-Batch3-Mock-Frac16  
**Method** ITMS; CID      **Genenames** FGB

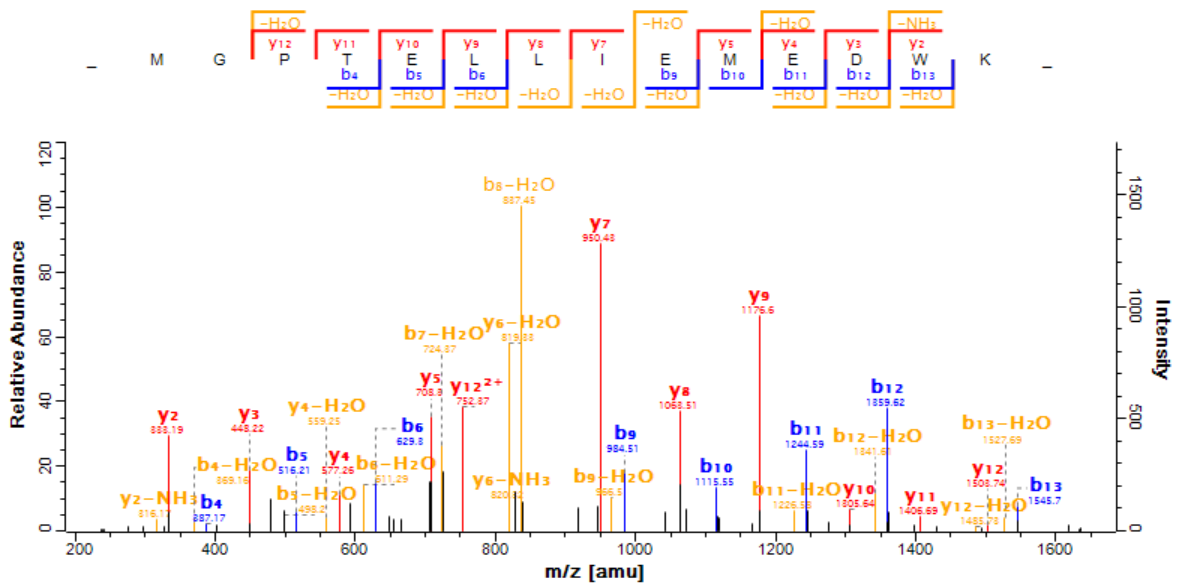

**Protein Group ID:** 528

**Protein Accession Numbers:** P42702; D6RF33; D6RJ94

**Gene Names:** LIFR

**Peptide Sequence:** MMDIYVCLK

**Total Number of Spectra:** 4

**Number of Replicates (out of 10):** 4

**Best Match Score:** 71.223

**Best Match Posterior Error Probability:** 0.0091376

**Best Match Spectrum:**

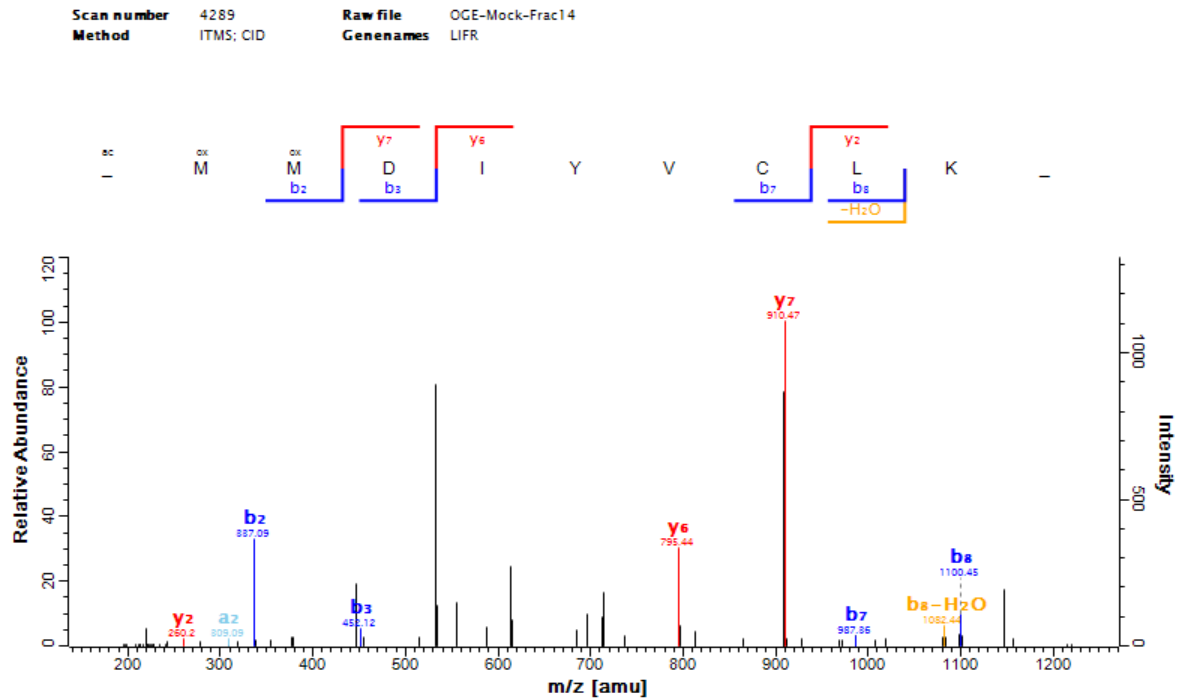

**Protein Group ID:** 529

**Protein Accession Numbers:** P19838-2; P19838; P19838-3; D6RF93

**Gene Names:** NFKB1

**Peptide Sequence:** LMFTAFLPDSTGSFTR

**Total Number of Spectra:** 2

**Number of Replicates (out of 10):** 2

**Best Match Score:** 76.82

**Best Match Posterior Error Probability:** 0.0013548

**Best Match Spectrum:**

|                    |           |                  |                            |
|--------------------|-----------|------------------|----------------------------|
| <b>Scan number</b> | 5243      | <b>Raw file</b>  | Prt-OGE-Batch3-Mock-Frac16 |
| <b>Method</b>      | ITMS; CID | <b>Genenames</b> | NFKB1                      |

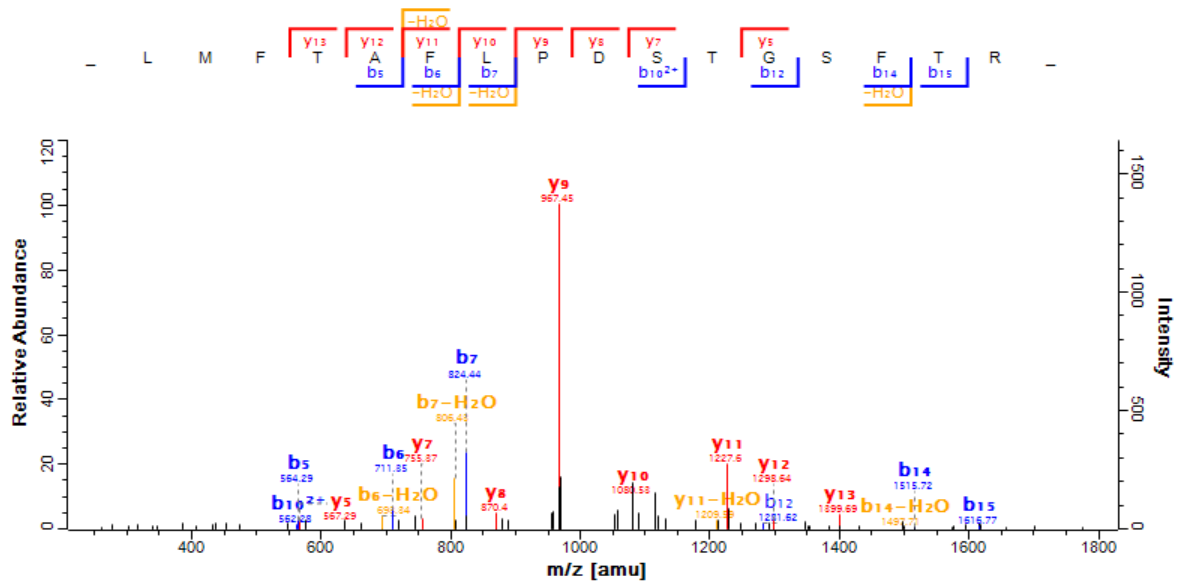

**Protein Group ID:** 533

**Protein Accession Numbers:** Q96J01; Q6NZ53; D6RGZ2

**Gene Names:** THOC3

**Peptide Sequence:** YVLGMQELFR

**Total Number of Spectra:** 10

**Number of Replicates (out of 10):** 7

**Best Match Score:** 132.78

**Best Match Posterior Error Probability:** 7.94E-05

**Best Match Spectrum:**

|                    |           |                  |                            |
|--------------------|-----------|------------------|----------------------------|
| <b>Scan number</b> | 5806      | <b>Raw file</b>  | Prt-OGE-Batch3-Mock-Frac10 |
| <b>Method</b>      | ITMS; CID | <b>Genenames</b> | THOC3                      |

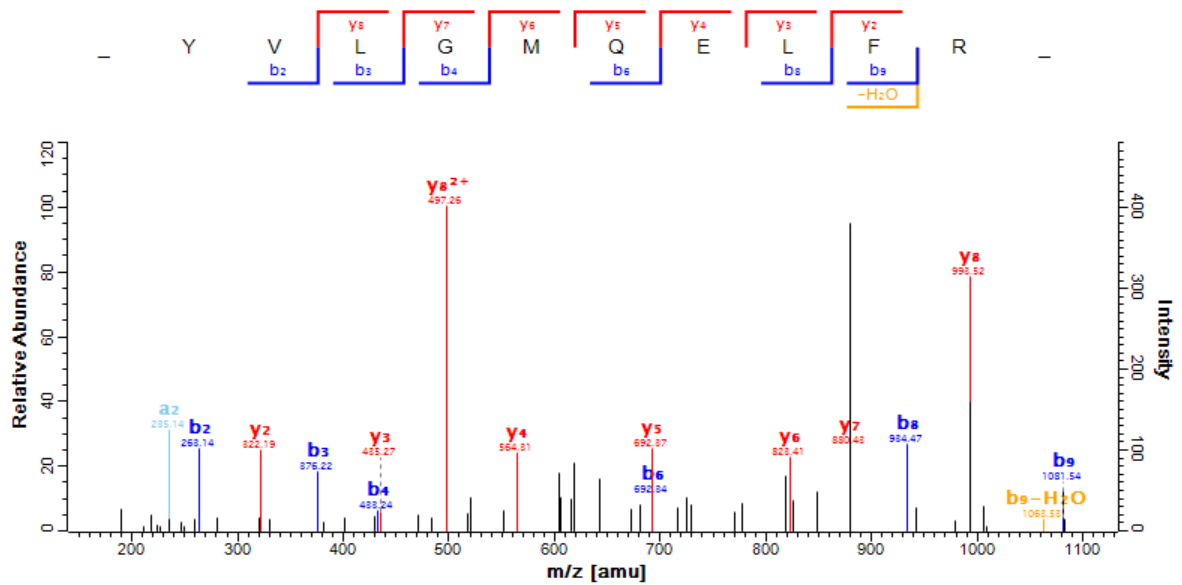

**Protein Group ID:** 537

**Protein Accession Numbers:** P35680; H0YL84; P35680-2; E0YMJ9; P35680-3

**Gene Names:** HNF1B

**Peptide Sequence:** L T S L Q Q E L S A L L S S G V T K

**Total Number of Spectra:** 2

**Number of Replicates (out of 10):** 2

**Best Match Score:** 80.545

**Best Match Posterior Error Probability:** 0.0012609

**Best Match Spectrum:**

**Scan number** 7213      **Raw file** 20100914-KD-Batch4-Prt-OGE-Mock-Frac16  
**Method** ITMS; CID      **Genenames** HNF1B

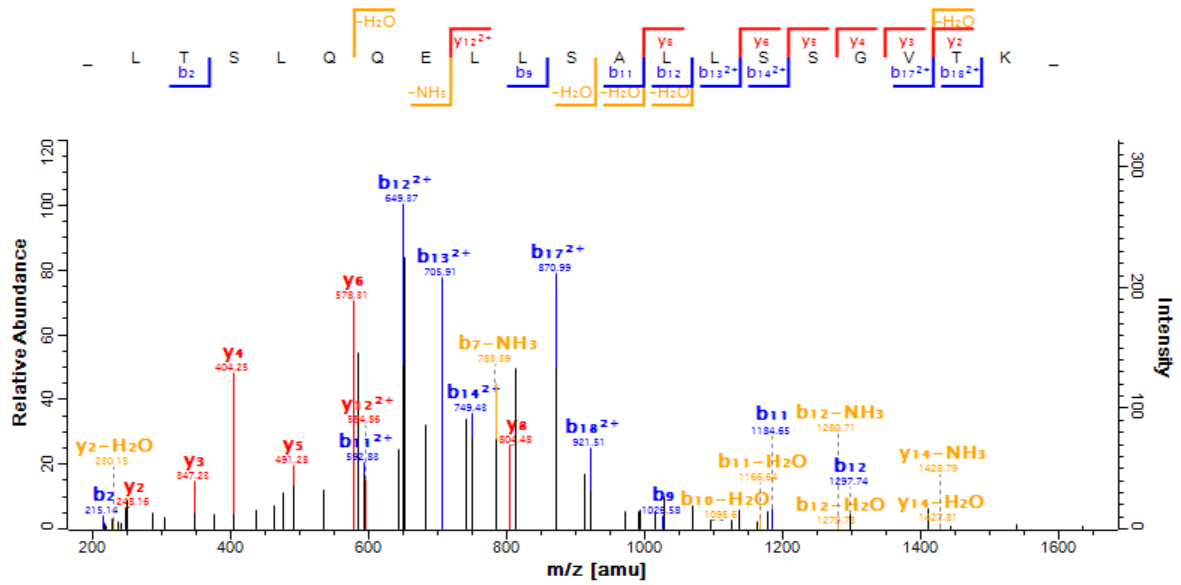

**Protein Group ID:** 538

**Protein Accession Numbers:** Q7L4I2; Q7L4I2-2; E1B6W4; H0YGP9

**Gene Names:** RSRC2

**Peptide Sequence:** NTAMDAQEALAR

**Total Number of Spectra:** 4

**Number of Replicates (out of 10):** 4

**Best Match Score:** 203.87

**Best Match Posterior Error Probability:** 2.83E-23

**Best Match Spectrum:**

**Scan number** 1777      **Raw file** Prt-OGE-Batch2-WT-Frac14  
**Method** ITMS; CID      **Genenames** RSRC2

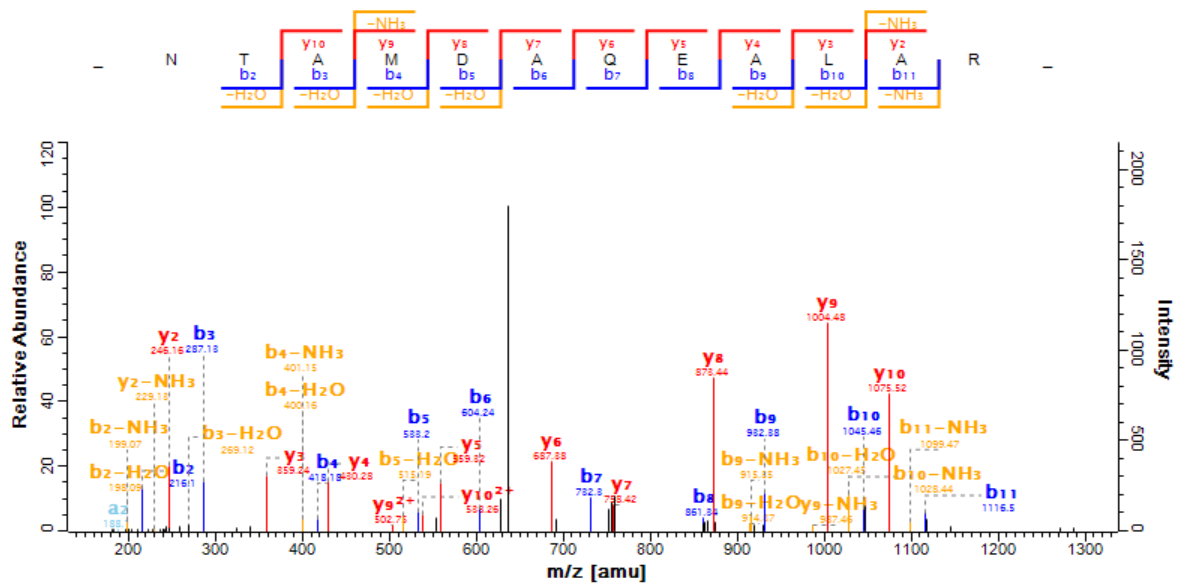



**Protein Group ID:** 540  
**Protein Accession Numbers:** O15031; E2PU09  
**Gene Names:** PLXNB2  
**Peptide Sequence:** DLVLSGDLGSLYAMTQDK  
**Total Number of Spectra:** 1  
**Number of Replicates (out of 10):** 1  
**Best Match Score:** 101.78  
**Best Match Posterior Error Probability:** 0.00021301  
**Best Match Spectrum:**

**Scan number** 5862      **Raw file** 20100914-KD-Batch4-Prt-OGE-Mock-Frac10  
**Method** ITMS; CID      **Genenames** PLXNB2

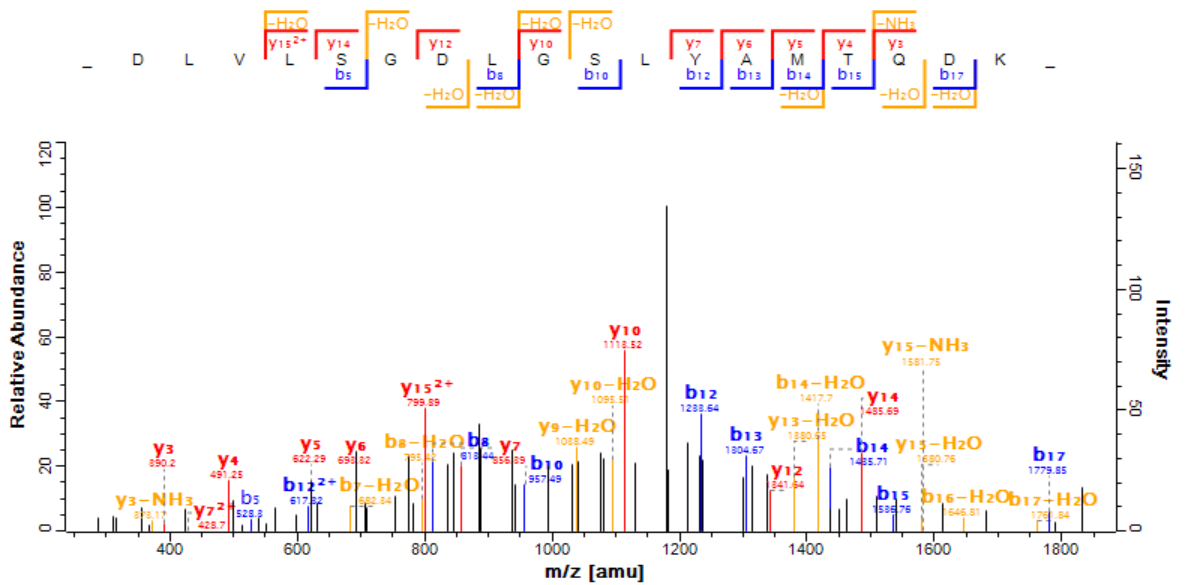

**Protein Group ID:** 543

**Protein Accession Numbers:** P34913; E5RFU2; E5RFH6; H0YAW7; E5RI53

**Gene Names:** EPHX2

**Peptide Sequence:** AAVFDLDGVLALPAGVFLGR

**Total Number of Spectra:** 2

**Number of Replicates (out of 10):** 2

**Best Match Score:** 91.401

**Best Match Posterior Error Probability:** 5.22E-05

**Best Match Spectrum:**

**Scan number** 8668      **Raw file** 20100927-KD-Batch4-Prt-OGE-WT-Frac12  
**Method** ITMS; CID      **Genenames** EPHX2

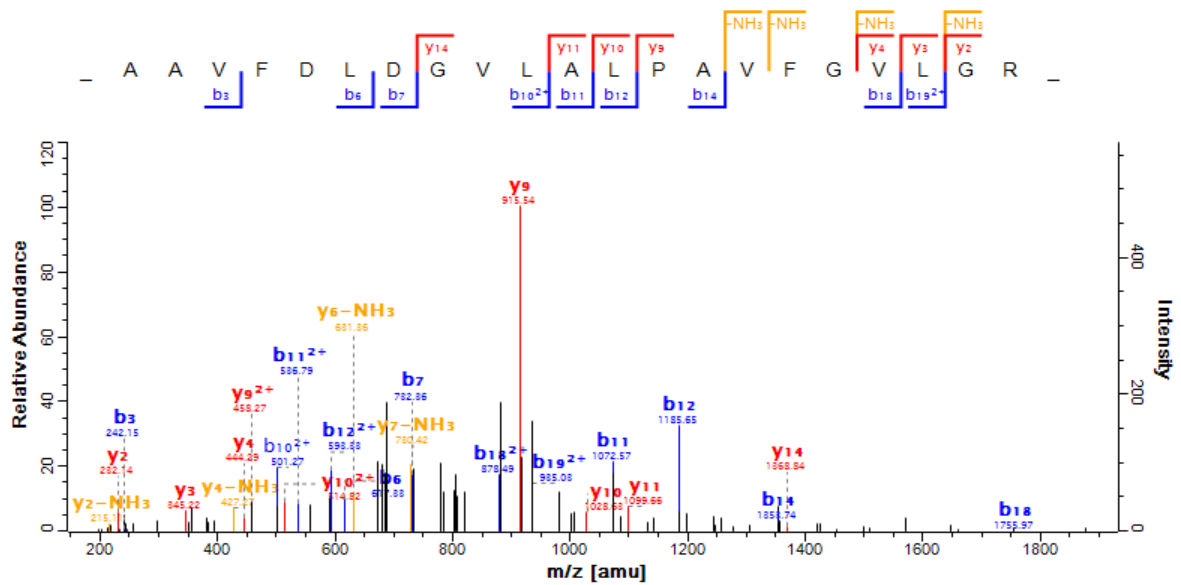

**Protein Group ID:** 545

**Protein Accession Numbers:** E7EV80; Q14168; Q14168-3; Q14168-2; E7EX01; E5RI47; E5RIU3; E5RI32; E5RK44; E5RJK0; E5RK50; E5RFN8

**Gene Names:** MPP2

**Peptide Sequence:** LEETKLEAVR

**Total Number of Spectra:** 17

**Number of Replicates (out of 10):** 8

**Best Match Score:** 117.7

**Best Match Posterior Error Probability:** 0.00053782

**Best Match Spectrum:**

|                    |           |                  |                         |
|--------------------|-----------|------------------|-------------------------|
| <b>Scan number</b> | 2488      | <b>Raw file</b>  | Prt-OGE-Batch3-WT-Frac7 |
| <b>Method</b>      | ITMS: CID | <b>Genenames</b> | MPP2                    |

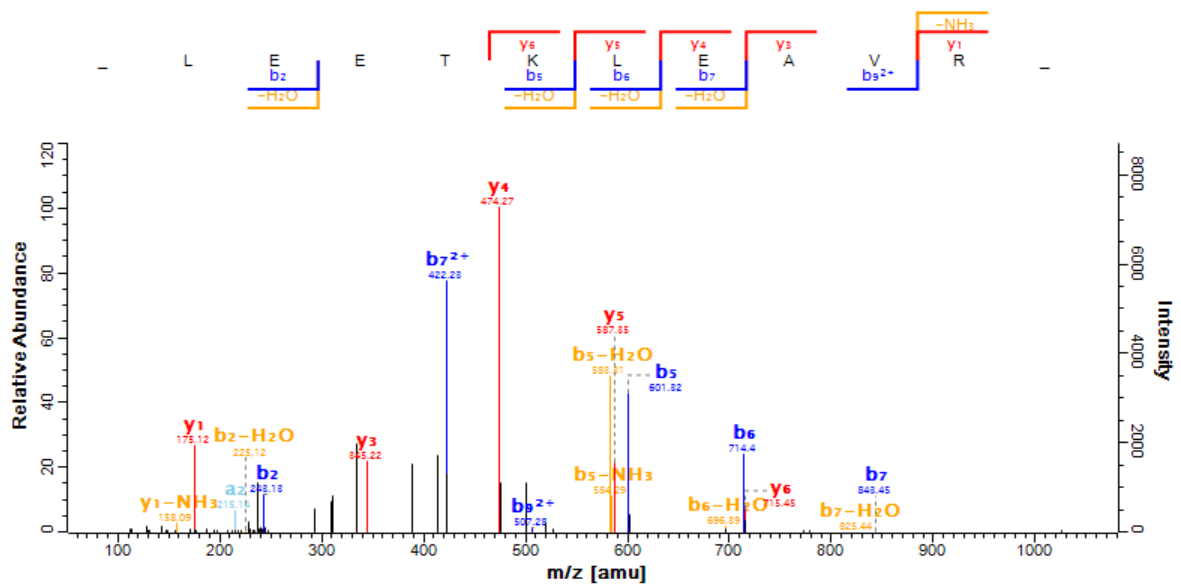

**Protein Group ID:** 546  
**Protein Accession Numbers:** Q8WXA9-2; E5RFV3  
**Gene Names:** SREK1  
**Peptide Sequence:** TLFSFLGEIEELR  
**Total Number of Spectra:** 2  
**Number of Replicates (out of 10):** 2  
**Best Match Score:** 105.95  
**Best Match Posterior Error Probability:** 0.00033207  
**Best Match Spectrum:**

**Scan number** 8105      **Raw file** Prt-OGE-Batch2-Mock-Frac16  
**Method** ITMS; CID      **Genenames** SREK1

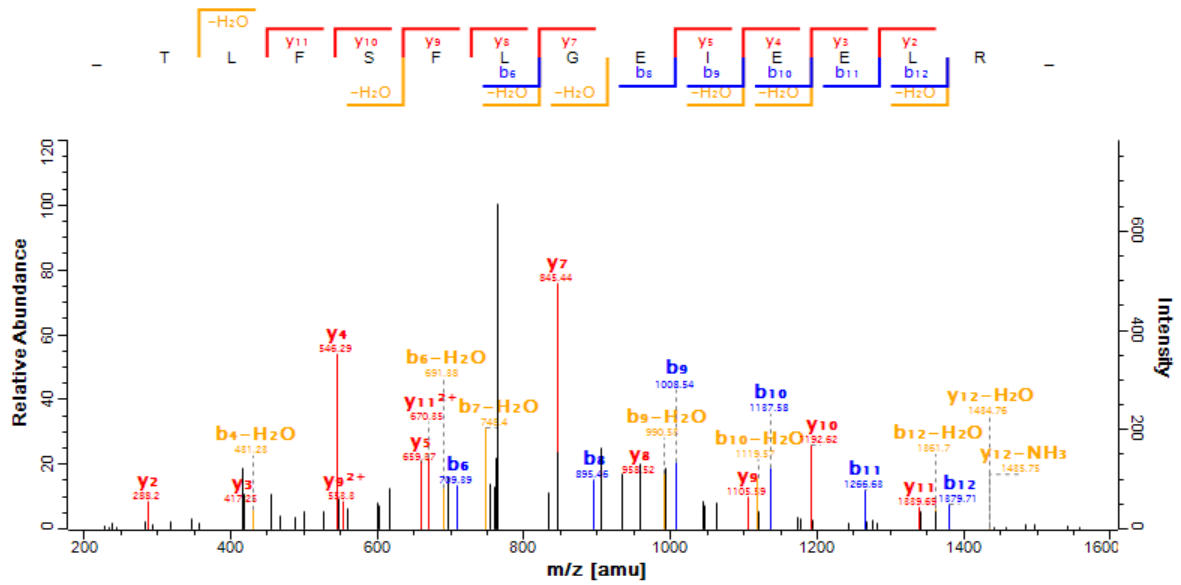

**Protein Group ID:** 547

**Protein Accession Numbers:** Q8TCF1; E5RJ99; Q8TCF1-2; E5RI74; E5RGE5; E5RJ74; E5RK75

**Gene Names:** ZFAND1

**Peptide Sequence:** IYFQVFLPK

**Total Number of Spectra:** 3

**Number of Replicates (out of 10):** 3

**Best Match Score:** 103.56

**Best Match Posterior Error Probability:** 0.00065663

**Best Match Spectrum:**

|                    |           |                  |                          |
|--------------------|-----------|------------------|--------------------------|
| <b>Scan number</b> | 4773      | <b>Raw file</b>  | Prt-OGE-Batch2-WT-Frac17 |
| <b>Method</b>      | ITMS: CID | <b>Genenames</b> | ZFAND1                   |

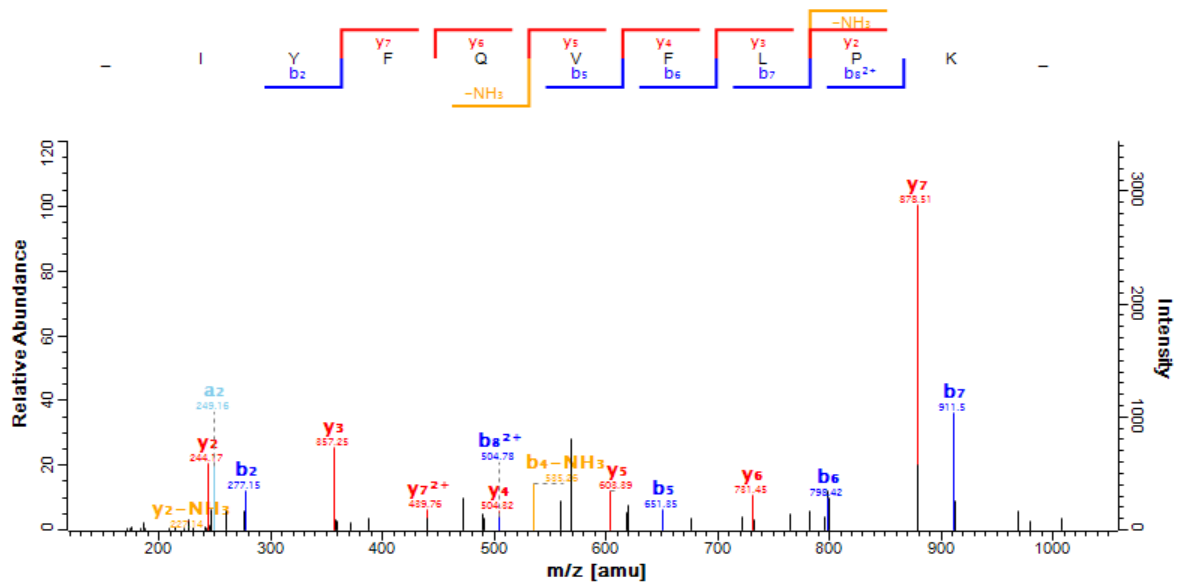

**Protein Group ID:** 549

**Protein Accession Numbers:** O14920; O14920-2; O14920-4; G3V105; E5RGW5; O14920-3

**Gene Names:** IKBKB

**Peptide Sequence:** EGAILTLLSDIASALR

**Total Number of Spectra:** 4

**Number of Replicates (out of 10):** 3

**Best Match Score:** 109.79

**Best Match Posterior Error Probability:** 0.00012942

**Best Match Spectrum:**

|                    |           |                  |               |
|--------------------|-----------|------------------|---------------|
| <b>Scan number</b> | 8184      | <b>Raw file</b>  | OGE-WT-Frac10 |
| <b>Method</b>      | ITMS: CID | <b>Genenames</b> | IKBKB         |

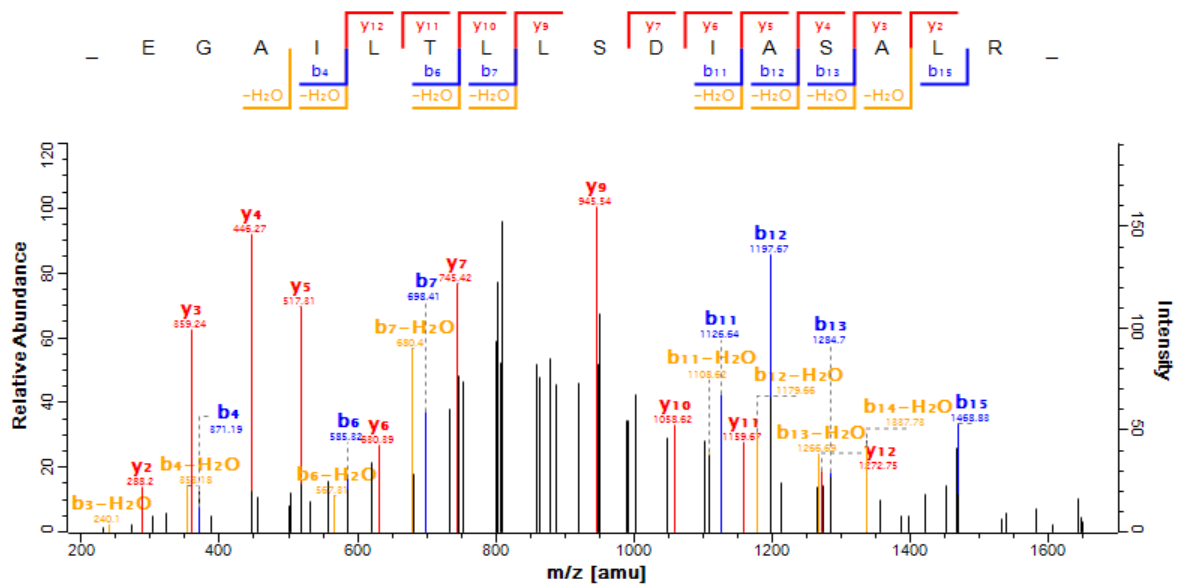

**Protein Group ID:** 550

**Protein Accession Numbers:** Q93045-2; Q93045; E5RGX5

**Gene Names:** STMN2

**Peptide Sequence:** ALEENNNFSK

**Total Number of Spectra:** 8

**Number of Replicates (out of 10):** 2

**Best Match Score:** 125.72

**Best Match Posterior Error Probability:** 0.00010344

**Best Match Spectrum:**

**Scan number** 1536      **Raw file** OGE-WT-Frac8  
**Method** ITMS; CID      **Genenames** STMN2

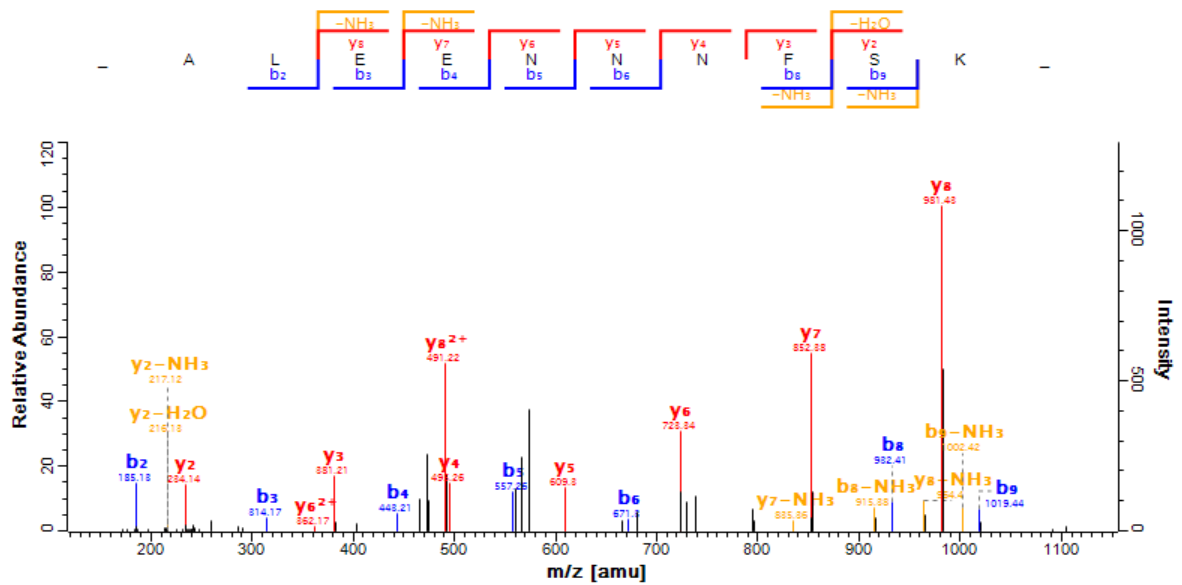

**Protein Group ID:** 557  
**Protein Accession Numbers:** Q9P015; E5RIZ4  
**Gene Names:** MRPL15  
**Peptide Sequence:** ILKPTDENLLK  
**Total Number of Spectra:** 2  
**Number of Replicates (out of 10):** 2  
**Best Match Score:** 97.813  
**Best Match Posterior Error Probability:** 0.0009971  
**Best Match Spectrum:**

**Scan number** 3396      **Raw file** Prt-OGE-Batch2-Mock-Frac17  
**Method** ITMS; CID      **Genenames** MRPL15

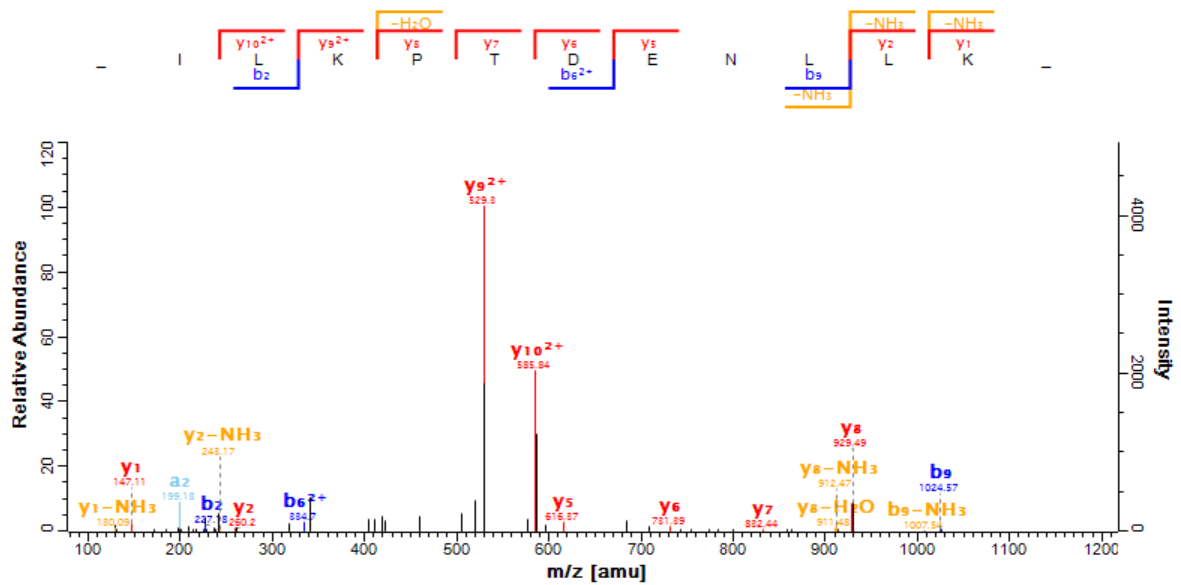



**Protein Group ID:** 560  
**Protein Accession Numbers:** E5RJR1  
**Gene Names:** MCTP1  
**Peptide Sequence:** MGSAFLDLTQLELR  
**Total Number of Spectra:** 1  
**Number of Replicates (out of 10):** 1  
**Best Match Score:** 47.189  
**Best Match Posterior Error Probability:** 0.046843  
**Best Match Spectrum:**

|                    |           |                  |                 |
|--------------------|-----------|------------------|-----------------|
| <b>Scan number</b> | 6259      | <b>Raw file</b>  | OGE-Mock-Frac12 |
| <b>Method</b>      | ITMS; CID | <b>Genenames</b> | MCTP1           |

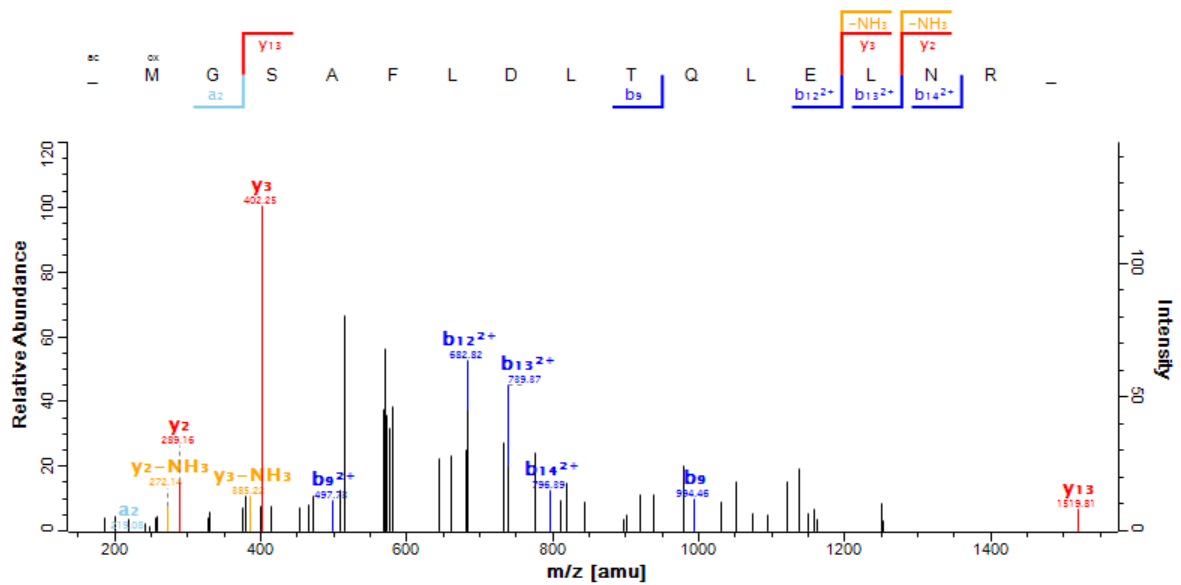

**Protein Group ID:** 568

**Protein Accession Numbers:** E9PJ55; Q9NUJ3; E7EN41

**Gene Names:** TCP11L1

**Peptide Sequence:** QPNSLDFVTQWLEEAASSEEDLMTQK

**Total Number of Spectra:** 1

**Number of Replicates (out of 10):** 1

**Best Match Score:** 96.55

**Best Match Posterior Error Probability:** 2.66E-06

**Best Match Spectrum:**

**Scan number** 8241      **Raw file** OGE-Mock-Frac7  
**Method** ITMS; CID      **Genenames** TCP11L1

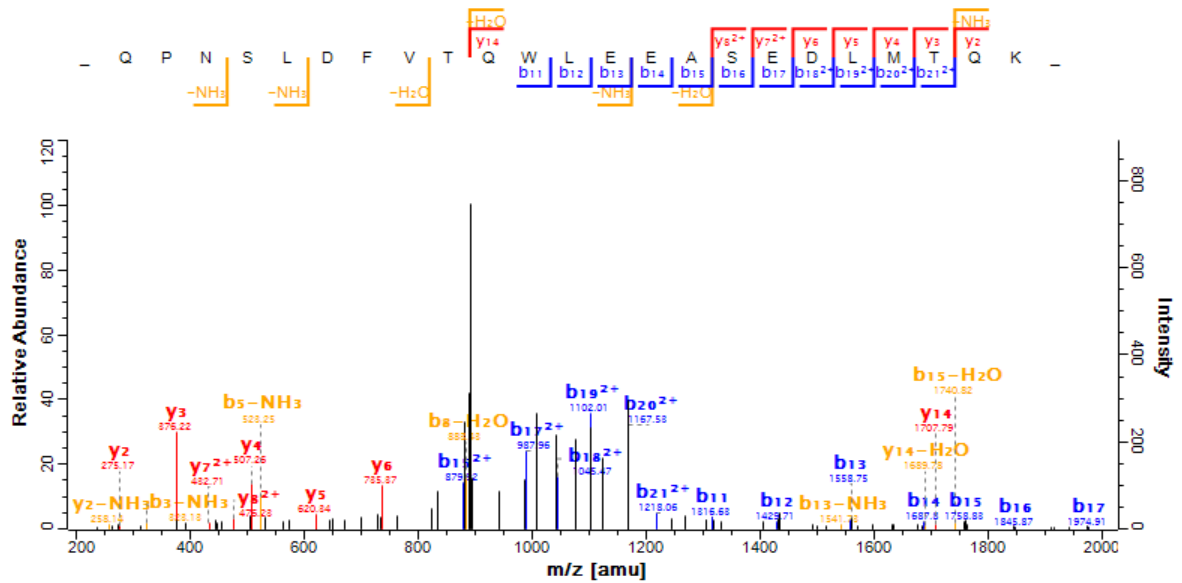

**Protein Group ID:** 570

**Protein Accession Numbers:** Q8NF91; E9PEL9; Q8NF91-4; E7ENN3; Q8NF91-2; Q8NF91-8

**Gene Names:** SYNE1

**Peptide Sequence:** VLFTSLADNK

**Total Number of Spectra:** 5

**Number of Replicates (out of 10):** 5

**Best Match Score:** 113.71

**Best Match Posterior Error Probability:** 0.00024064

**Best Match Spectrum:**

|                    |           |                  |                                        |
|--------------------|-----------|------------------|----------------------------------------|
| <b>Scan number</b> | 2352      | <b>Raw file</b>  | 20100914-KD-Batch4-Prt-OGE-Mock-Frac23 |
| <b>Method</b>      | ITMS; CID | <b>Genenames</b> | SYNE1                                  |

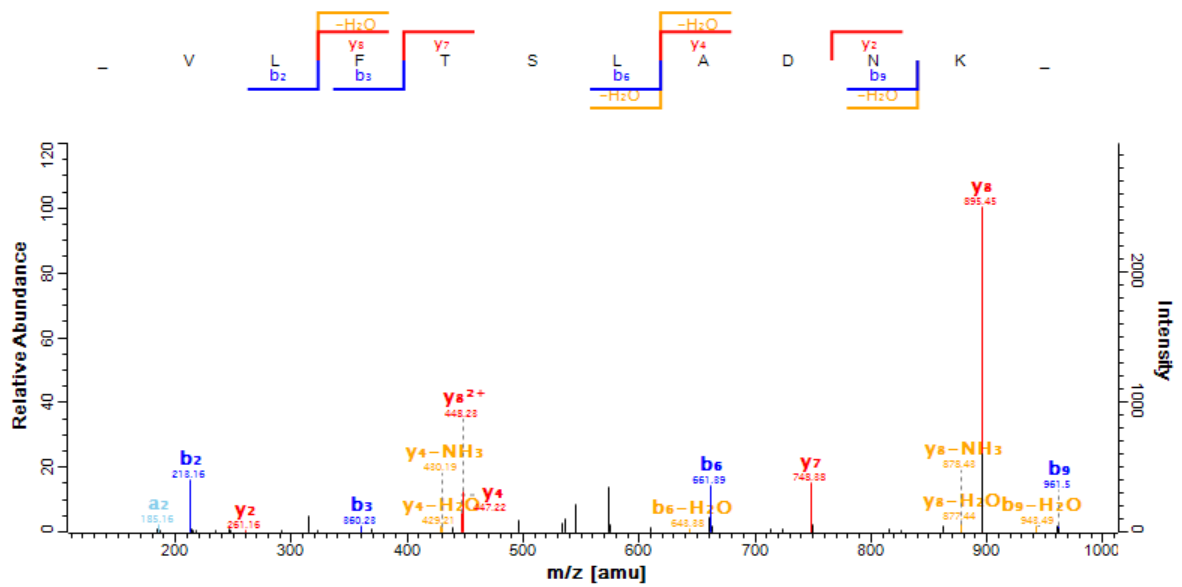

**Protein Group ID:** 574

**Protein Accession Numbers:** Q9UFG5-2; K7EK56; E7EP72; Q9UFG5; K7ELZ1; K7EQW1; K7ENK8

**Gene Names:** C19orf25

**Peptide Sequence:** VLLPTRPAPPTVEQILEDVR

**Total Number of Spectra:** 2

**Number of Replicates (out of 10):** 2

**Best Match Score:** 90.379

**Best Match Posterior Error Probability:** 0.00062212

**Best Match Spectrum:**

|                    |           |                  |                                       |
|--------------------|-----------|------------------|---------------------------------------|
| <b>Scan number</b> | 5900      | <b>Raw file</b>  | 20100917-KD-Batch5-Prt-OGE-Mock-Frac6 |
| <b>Method</b>      | ITMS; CID | <b>Genenames</b> | C19orf25                              |

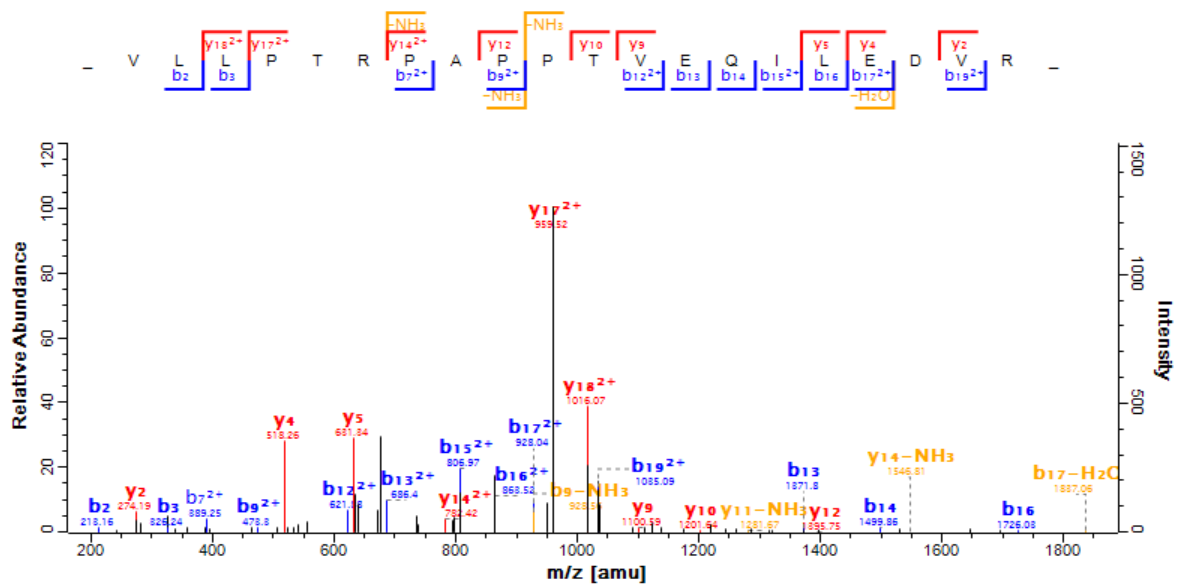

**Protein Group ID:** 581

**Protein Accession Numbers:** F5H160; F5H659; E7EPM3; J3KN18; Q7Z5Q1; Q7Z5Q1-3; Q7Z5Q1-6; Q7Z5Q1-4; Q7Z5Q1-5; Q7Z5Q1-7

**Gene Names:** CPEB2

**Peptide Sequence:** MYDSLNMHSLENSLIDIMR

**Total Number of Spectra:** 1

**Number of Replicates (out of 10):** 1

**Best Match Score:** 85.469

**Best Match Posterior Error Probability:** 0.00058421

**Best Match Spectrum:**

|                    |           |                  |                          |
|--------------------|-----------|------------------|--------------------------|
| <b>Scan number</b> | 5903      | <b>Raw file</b>  | Prt-OGE-Batch2-WT-Frac14 |
| <b>Method</b>      | ITMS; CID | <b>Genenames</b> | CPEB2                    |

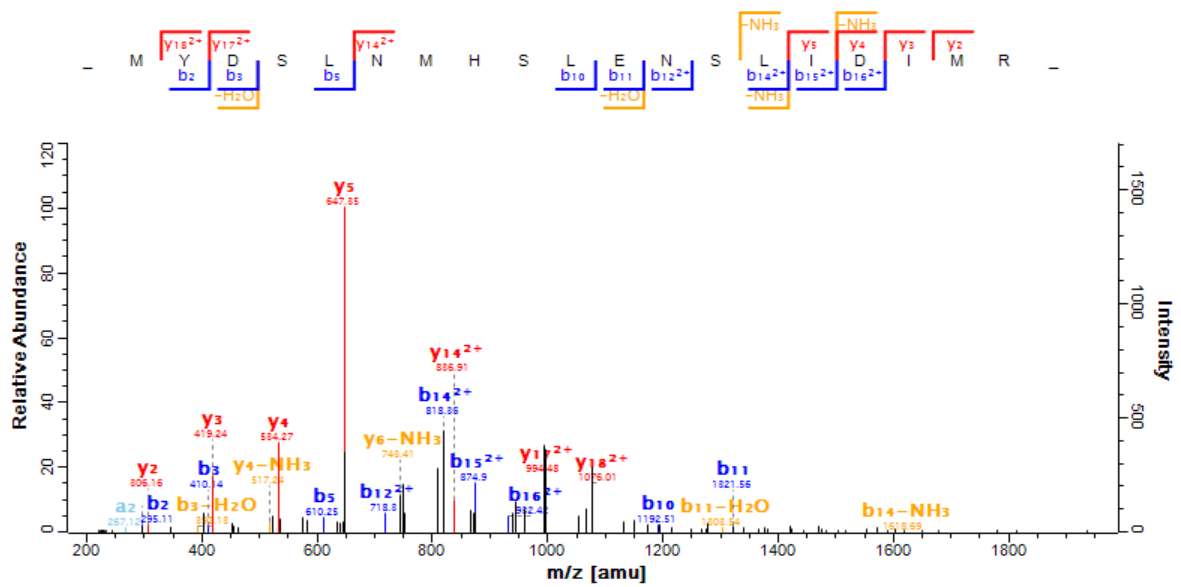

**Protein Group ID:** 587  
**Protein Accession Numbers:** Q14691; E7EQ95  
**Gene Names:** GINS1  
**Peptide Sequence:** ALYEQNQSDVNEAK  
**Total Number of Spectra:** 1  
**Number of Replicates (out of 10):** 1  
**Best Match Score:** 136.39  
**Best Match Posterior Error Probability:** 1.30E-05  
**Best Match Spectrum:**

**Scan number** 1194      **Raw file** 20100930-KD-Batch5-Prt-OGE-WT-Frac16  
**Method** ITMS; CID      **Genenames** GINS1

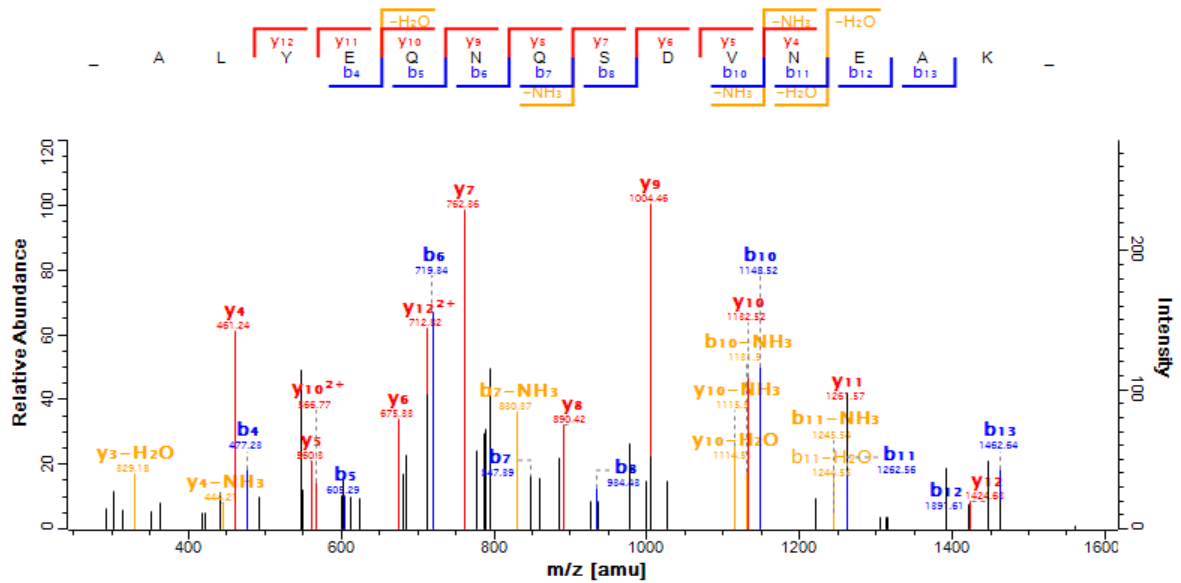

**Protein Group ID:** 590

**Protein Accession Numbers:** Q6P4F2; Q8N8B8; E7EQL1

**Gene Names:** FDX1L

**Peptide Sequence:** VGDNVLHLAQR

**Total Number of Spectra:** 5

**Number of Replicates (out of 10):** 5

**Best Match Score:** 105.2

**Best Match Posterior Error Probability:** 0.00020091

**Best Match Spectrum:**

**Scan number** 2243      **Raw file** Prt-OGE-Batch3-WT-Frac4  
**Method** ITMS; CID      **Genenames** FDX1L

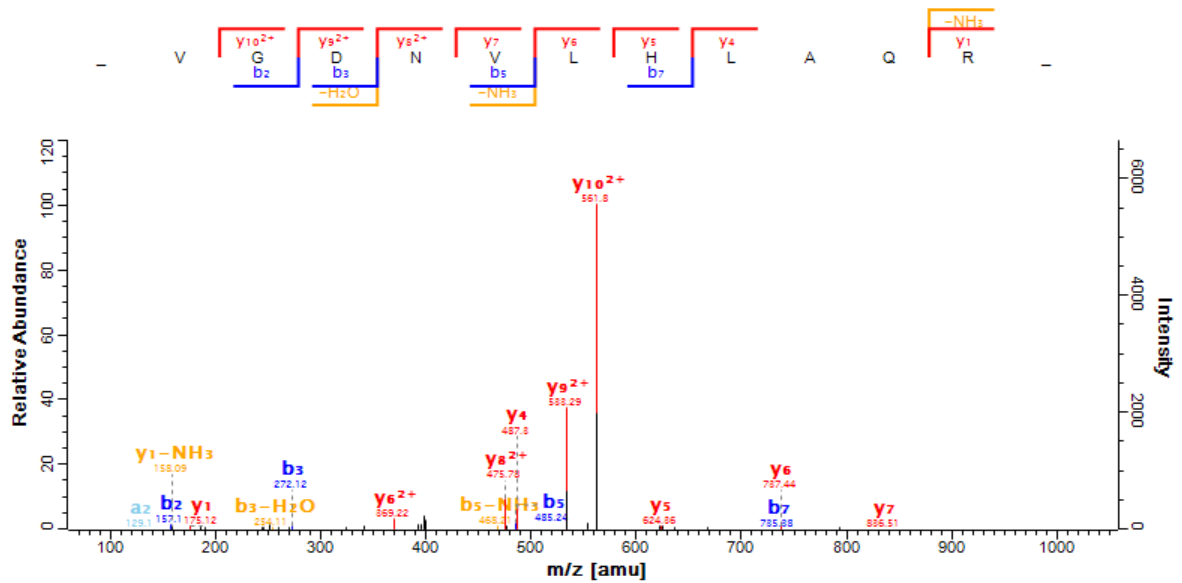

**Protein Group ID:** 597  
**Protein Accession Numbers:** E7ERX3  
**Gene Names:** DST  
**Peptide Sequence:** MGQLMKNDQDWNK  
**Total Number of Spectra:** 2  
**Number of Replicates (out of 10):** 2  
**Best Match Score:** 80.312  
**Best Match Posterior Error Probability:** 0.0028304  
**Best Match Spectrum:**

**Scan number** 3371      **Raw file** 20100927-KD-Batch4-Prt-OGE-WT-Frac16  
**Method** ITMS; CID      **Genenames** DST

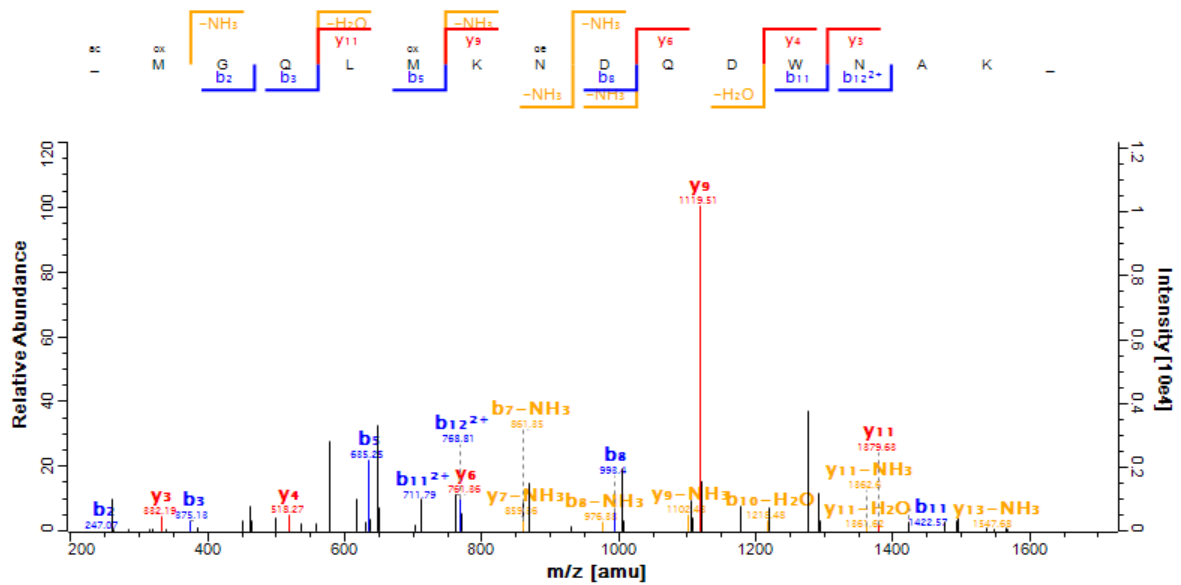



**Protein Group ID:** 598

**Protein Accession Numbers:** Q9P2P6; H3BNE9; F8VPJ2; Q9NQT8; Q9H1H9; E9PDX3; Q9H1H9-2; Q9H1H9-4; Q9H1H9-3; Q96L93-2; Q96L93; Q96L93-4; Q96L93-6; Q96L93-5; O43896; E7ERX9; Q9P2P6-3

**Gene Names:** STARD9;KIF13A;KIF13B;KIF16B;KIF1C

**Peptide Sequence:** DSVLTWLLK

**Total Number of Spectra:** 12

**Number of Replicates (out of 10):** 8

**Best Match Score:** 120.15

**Best Match Posterior Error Probability:** 0.00030744

**Best Match Spectrum:**

|                    |           |                  |                                   |
|--------------------|-----------|------------------|-----------------------------------|
| <b>Scan number</b> | 5344      | <b>Raw file</b>  | Prt-OGE-Batch3-WT-Frac13          |
| <b>Method</b>      | ITMS: CID | <b>Genenames</b> | STARD9;KIF13A;KIF13B;KIF16B;KIF1C |

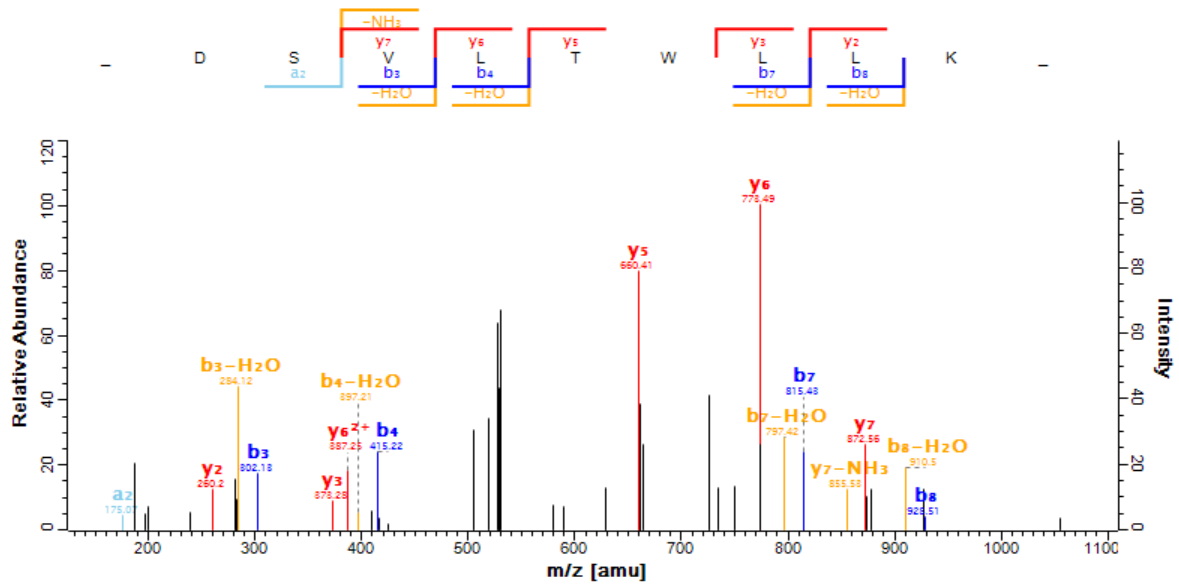

**Protein Group ID:** 602

**Protein Accession Numbers:** Q92504; F5H0B5; E7ESG6

**Gene Names:** SLC39A7

**Peptide Sequence:** EASPLQSLLEVLGLLGGVIMMVLI AHLE

**Total Number of Spectra:** 2

**Number of Replicates (out of 10):** 2

**Best Match Score:** 89.721

**Best Match Posterior Error Probability:** 3.12E-09

**Best Match Spectrum:**

|                    |           |                  |                                      |
|--------------------|-----------|------------------|--------------------------------------|
| <b>Scan number</b> | 10967     | <b>Raw file</b>  | 20100927-KD-Batch4-Prt-OGE-WT-Frac11 |
| <b>Method</b>      | ITMS; CID | <b>Genenames</b> | SLC39A7                              |

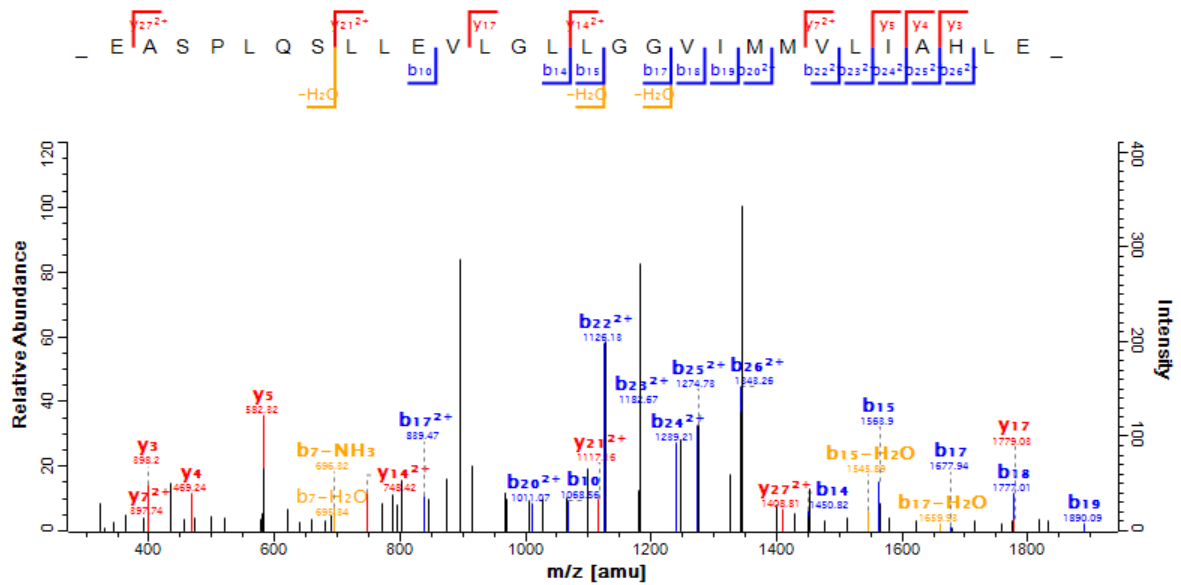

**Protein Group ID:** 606

**Protein Accession Numbers:** Q86UW9; E7ET89

**Gene Names:** DTX2

**Peptide Sequence:** VQQALAGMTSVLMSALIGLPLVCLSR

**Total Number of Spectra:** 1

**Number of Replicates (out of 10):** 1

**Best Match Score:** 67.11

**Best Match Posterior Error Probability:** 0.00042002

**Best Match Spectrum:**

**Scan number** 7927      **Raw file** 20100917-KD-Batch5-Prt-OGE-Mock-Frac20  
**Method** ITMS; CID      **Genenames** DTX2

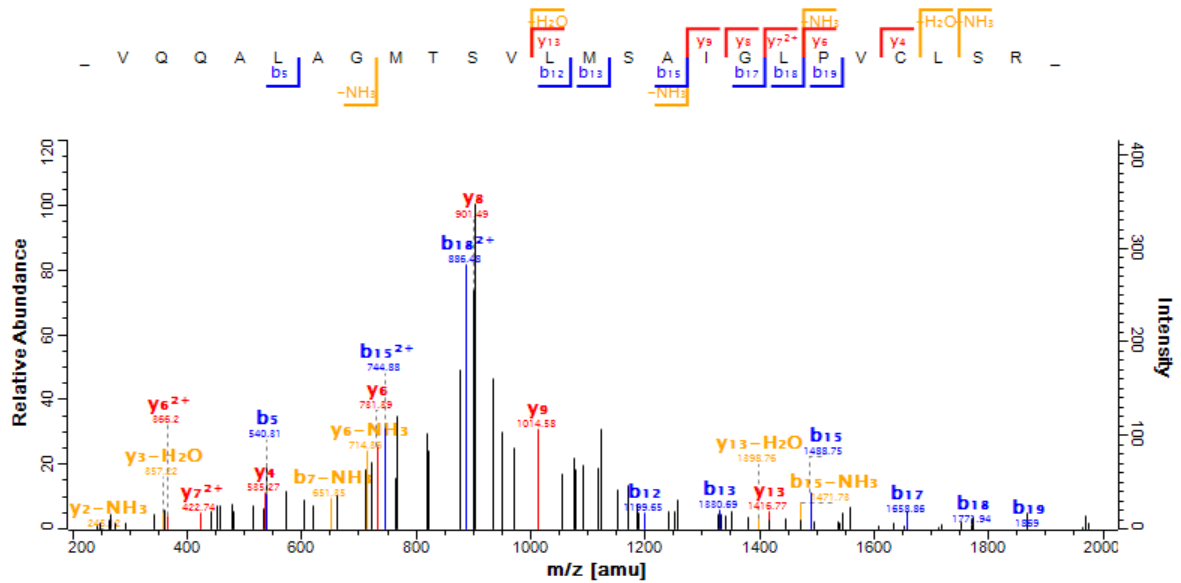

**Protein Group ID:** 620  
**Protein Accession Numbers:** E7EVQ5  
**Gene Names:** CTHRC1  
**Peptide Sequence:** IAVSLNYFK  
**Total Number of Spectra:** 8  
**Number of Replicates (out of 10):** 4  
**Best Match Score:** 111.74  
**Best Match Posterior Error Probability:** 0.00040846  
**Best Match Spectrum:**

**Scan number** 4187      **Raw file** 20100927-KD-Batch4-Prt-OGE-WT-Frac6  
**Method** ITMS; CID      **Genenames** CTHRC1

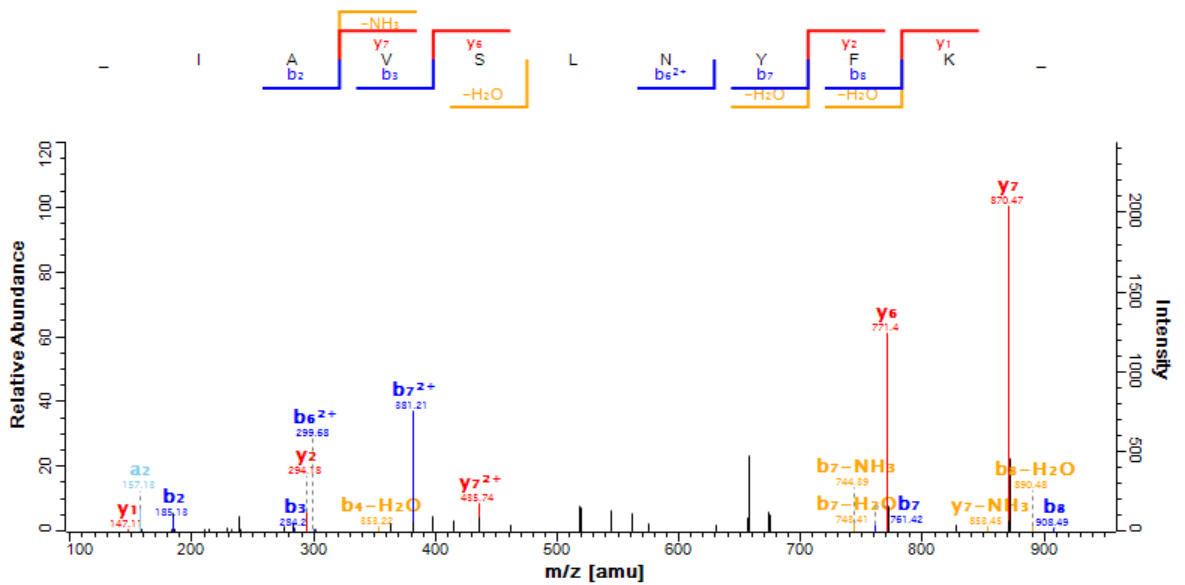

**Protein Group ID:** 625

**Protein Accession Numbers:** J3KNP0; Q6WKZ4; Q6WKZ4-3; Q6WKZ4-1; Q3I768; Q7L804; E7EX40

**Gene Names:** RAB11FIP1;RAB11FIP2

**Peptide Sequence:** ELEDYIDNLLVR

**Total Number of Spectra:** 1

**Number of Replicates (out of 10):** 1

**Best Match Score:** 106.49

**Best Match Posterior Error Probability:** 0.00023346

**Best Match Spectrum:**

|                    |           |                  |                            |
|--------------------|-----------|------------------|----------------------------|
| <b>Scan number</b> | 5010      | <b>Raw file</b>  | Prt-OGE-Batch3-Mock-Frac18 |
| <b>Method</b>      | ITMS: CID | <b>Genenames</b> | RAB11FIP1;RAB11FIP2        |

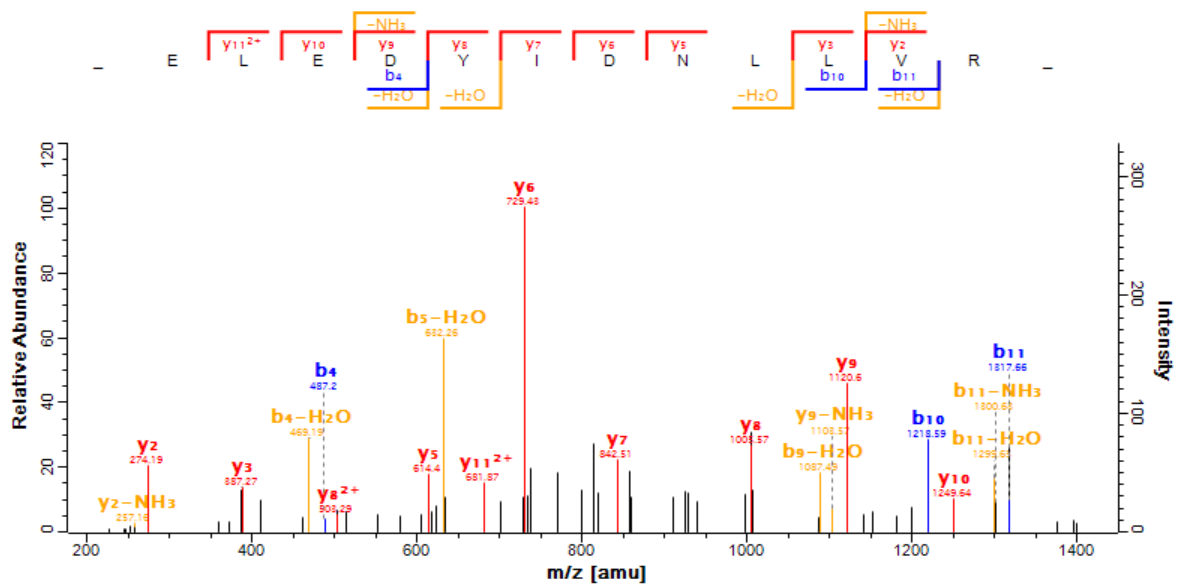

**Protein Group ID:** 628

**Protein Accession Numbers:** P52298; E9PAR5; F8WE41

**Gene Names:** NCBP2

**Peptide Sequence:** SDSYVELSQYR

**Total Number of Spectra:** 5

**Number of Replicates (out of 10):** 5

**Best Match Score:** 181.68

**Best Match Posterior Error Probability:** 3.56E-11

**Best Match Spectrum:**

|                    |           |                  |                             |
|--------------------|-----------|------------------|-----------------------------|
| <b>Scan number</b> | 2246      | <b>Raw file</b>  | Prt-OGE-Batch3-Mock-Frac1 8 |
| <b>Method</b>      | ITMS; CID | <b>Genenames</b> | NCBP2                       |

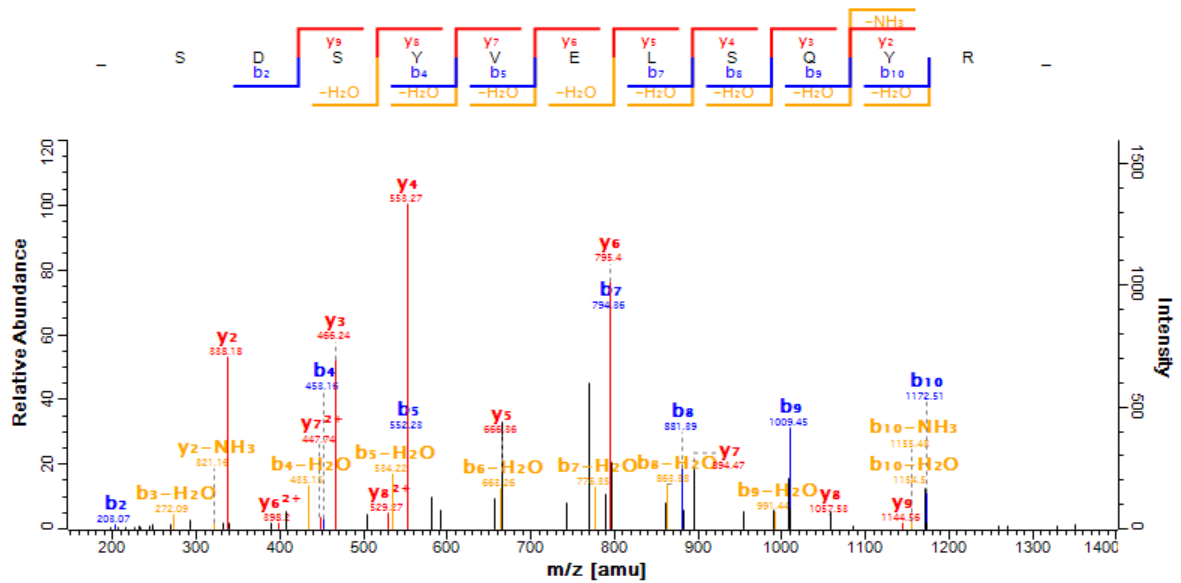

**Protein Group ID:** 636

**Protein Accession Numbers:** O43516-3; O43516; O43516-2; E9PB87

**Gene Names:** WIPF1

**Peptide Sequence:** PSASSQAPPPPPPPSR

**Total Number of Spectra:** 1

**Number of Replicates (out of 10):** 1

**Best Match Score:** 113.01

**Best Match Posterior Error Probability:** 0.00012623

**Best Match Spectrum:**

**Scan number** 1248      **Raw file** 20100930-KD-Batch5-Prt-OGE-WT-Frac19  
**Method** ITMS; CID      **Genenames** WIPF1

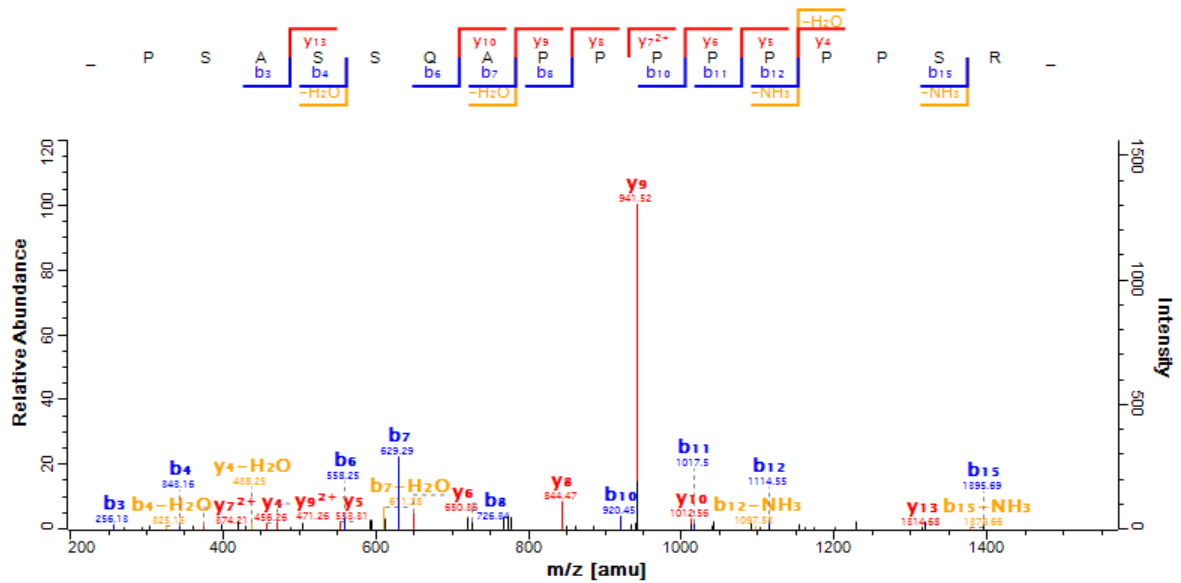

**Protein Group ID:** 640

**Protein Accession Numbers:** Q53H12; E9PC15; E9PG39

**Gene Names:** AGK

**Peptide Sequence:** IPIGFILGETSSLSHTLFAESGNK

**Total Number of Spectra:** 14

**Number of Replicates (out of 10):** 8

**Best Match Score:** 112.36

**Best Match Posterior Error Probability:** 3.91E-12

**Best Match Spectrum:**

|                    |           |                  |                             |
|--------------------|-----------|------------------|-----------------------------|
| <b>Scan number</b> | 7283      | <b>Raw file</b>  | Prt-OGE-Batch2-Mock-Frac1 8 |
| <b>Method</b>      | ITMS; CID | <b>Genenames</b> | AGK                         |

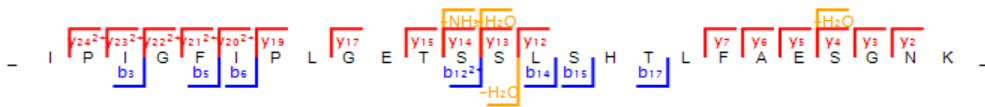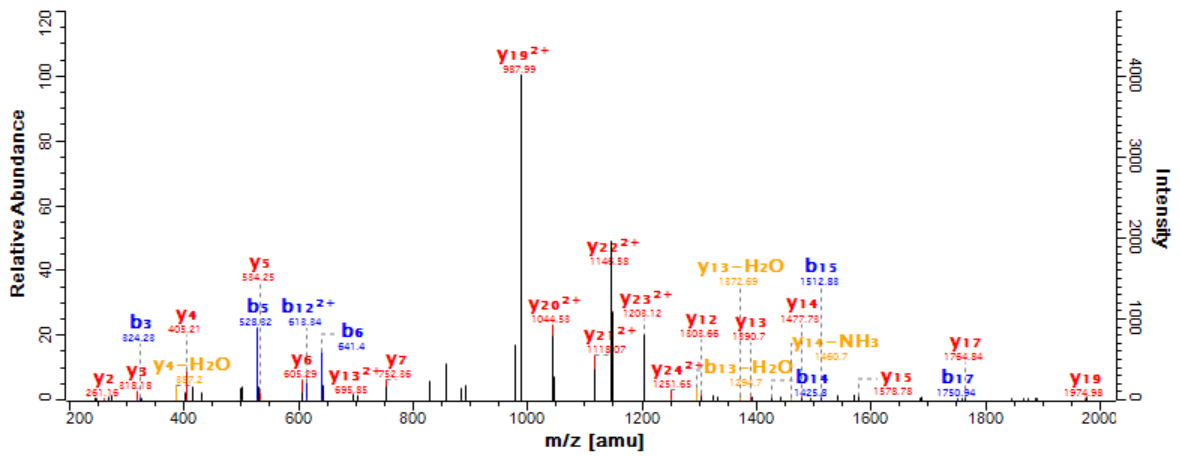



**Protein Group ID:** 641

**Protein Accession Numbers:** P24821; P24821-4; J3QSU6; E9PC84; F5H7V9; P24821-3; P24821-2; P24821-5; P24821-6

**Gene Names:** TNC

**Peptide Sequence:** LEELENLVSSLR

**Total Number of Spectra:** 1

**Number of Replicates (out of 10):** 1

**Best Match Score:** 127.02

**Best Match Posterior Error Probability:** 0.00018061

**Best Match Spectrum:**

|                    |           |                  |                                     |
|--------------------|-----------|------------------|-------------------------------------|
| <b>Scan number</b> | 5141      | <b>Raw file</b>  | 20100927-KD-Batch4-Prt-OGE-WT-Frac2 |
| <b>Method</b>      | ITMS: CID | <b>Genenames</b> | TNC                                 |

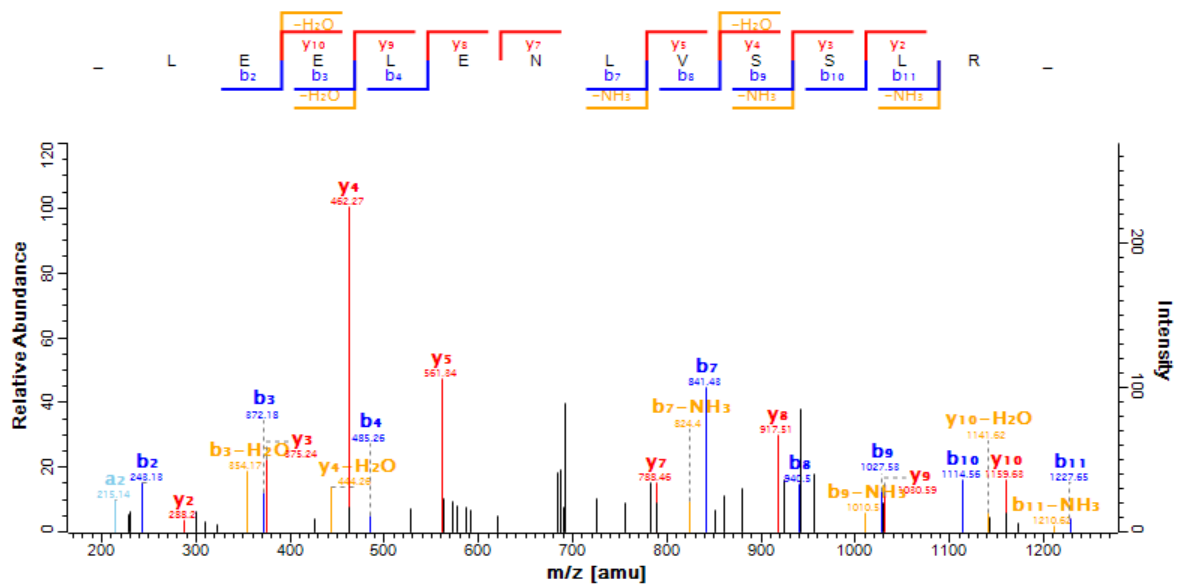

**Protein Group ID:** 653

**Protein Accession Numbers:** P32929; E9PDV0; P32929-2

**Gene Names:** CTH

**Peptide Sequence:** LSVGLEDEEDLLEDLDQALK

**Total Number of Spectra:** 1

**Number of Replicates (out of 10):** 1

**Best Match Score:** 117.74

**Best Match Posterior Error Probability:** 1.77E-06

**Best Match Spectrum:**

**Scan number** 6361      **Raw file** Prt-OGE-Batch2-WT-Frac14  
**Method** ITMS; CID      **Genenames** CTH

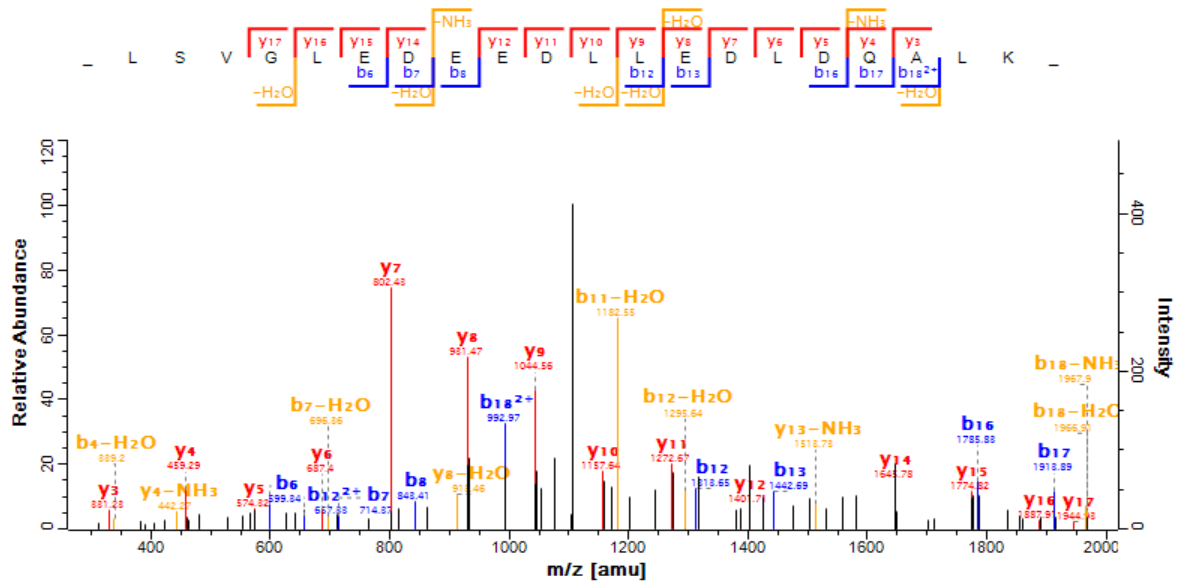

**Protein Group ID:** 654

**Protein Accession Numbers:** P16219; E9PE82

**Gene Names:** ACADS

**Peptide Sequence:** IGIASQALGIAQTALDCAVNYAENR

**Total Number of Spectra:** 1

**Number of Replicates (out of 10):** 1

**Best Match Score:** 68.569

**Best Match Posterior Error Probability:** 0.00018505

**Best Match Spectrum:**

|                    |           |                  |                                        |
|--------------------|-----------|------------------|----------------------------------------|
| <b>Scan number</b> | 8048      | <b>Raw file</b>  | 20100914-KD-Batch4-Prt-OGE-Mock-Frac14 |
| <b>Method</b>      | ITMS; CID | <b>Genenames</b> | ACADS                                  |

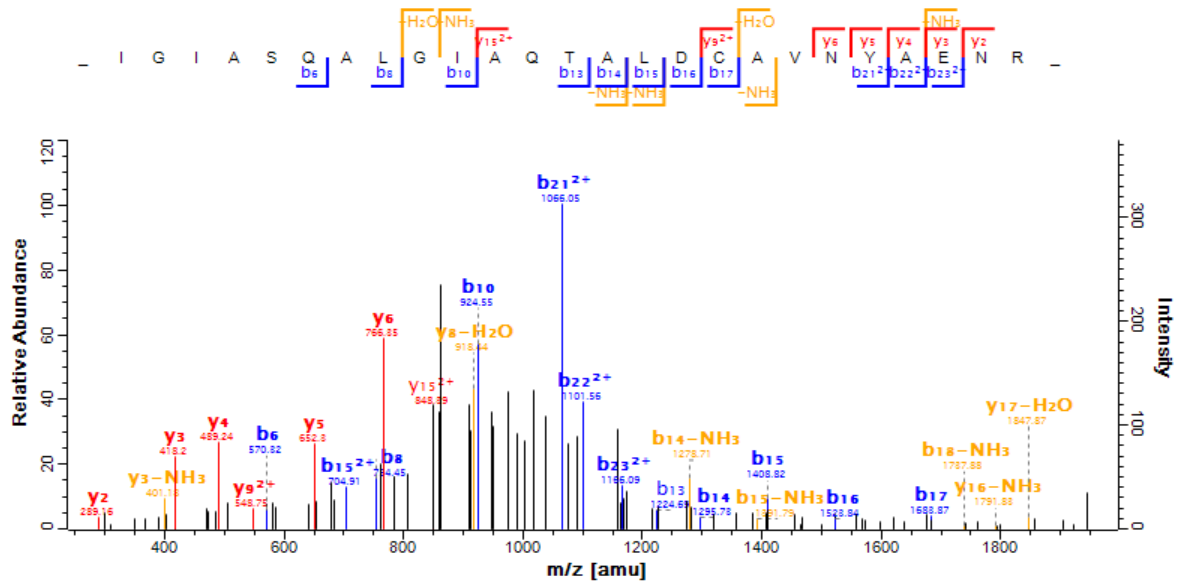

**Protein Group ID:** 661

**Protein Accession Numbers:** Q5JPI3; Q5JPI3-2; E9PFZ1

**Gene Names:** C3orf38

**Peptide Sequence:** QDAVHAILAYSQSAEELLR

**Total Number of Spectra:** 8

**Number of Replicates (out of 10):** 8

**Best Match Score:** 123.4

**Best Match Posterior Error Probability:** 1.80E-05

**Best Match Spectrum:**

**Scan number** 6661      **Raw file** 20100917-KD-Batch5-Prt-OGE-Mock-Frac13  
**Method** ITMS; CID      **Genenames** C3orf38

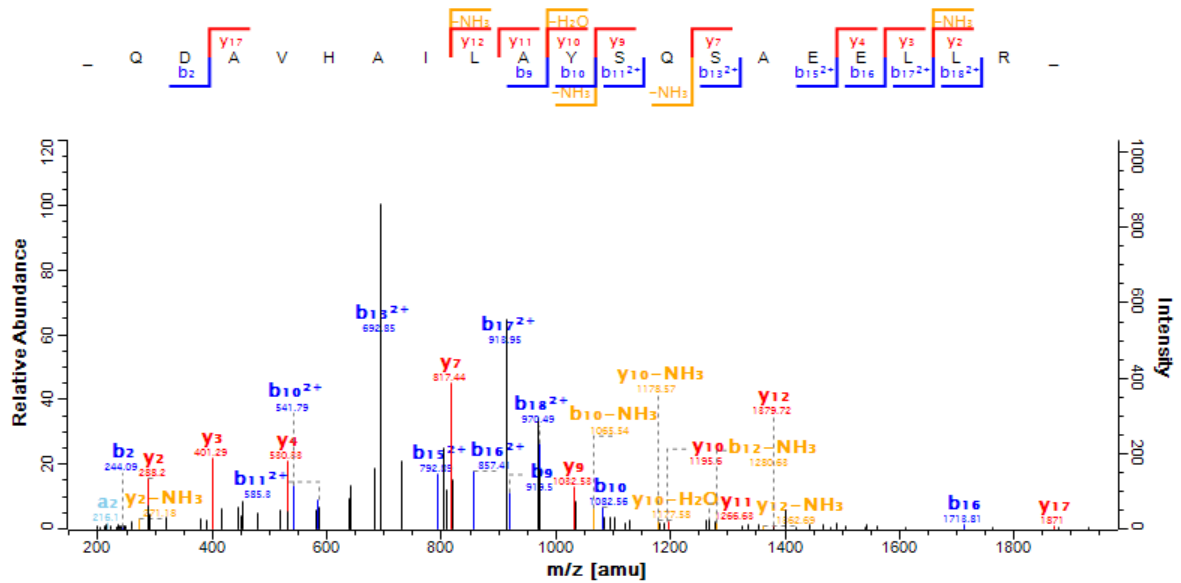

**Protein Group ID:** 662  
**Protein Accession Numbers:** Q15631; E9PGT1  
**Gene Names:** TSN  
**Peptide Sequence:** PLHISTFINELDSGFR  
**Total Number of Spectra:** 2  
**Number of Replicates (out of 10):** 2  
**Best Match Score:** 128.22  
**Best Match Posterior Error Probability:** 4.07E-05  
**Best Match Spectrum:**

**Scan number** 5454      **Raw file** Prt-OGE-Batch2-WTFrac11  
**Method** ITMS; CID      **Genenames** TSN

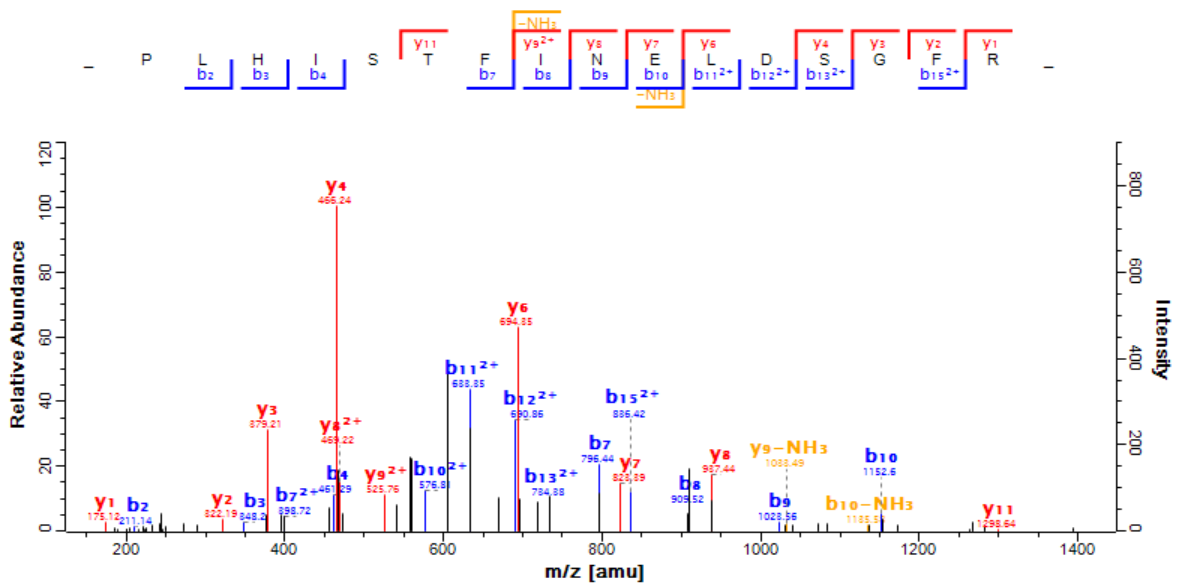

**Protein Group ID:** 669

**Protein Accession Numbers:** O43813; E9PHS0; F8WDS9

**Gene Names:** LANCL1

**Peptide Sequence:** SLAEGYFDAAGR

**Total Number of Spectra:** 1

**Number of Replicates (out of 10):** 1

**Best Match Score:** 120.53

**Best Match Posterior Error Probability:** 0.00022794

**Best Match Spectrum:**

|                    |           |                  |                          |
|--------------------|-----------|------------------|--------------------------|
| <b>Scan number</b> | 2667      | <b>Raw file</b>  | Prt-OGE-Batch2-WT-Frac18 |
| <b>Method</b>      | ITMS; CID | <b>Genenames</b> | LANCL1                   |

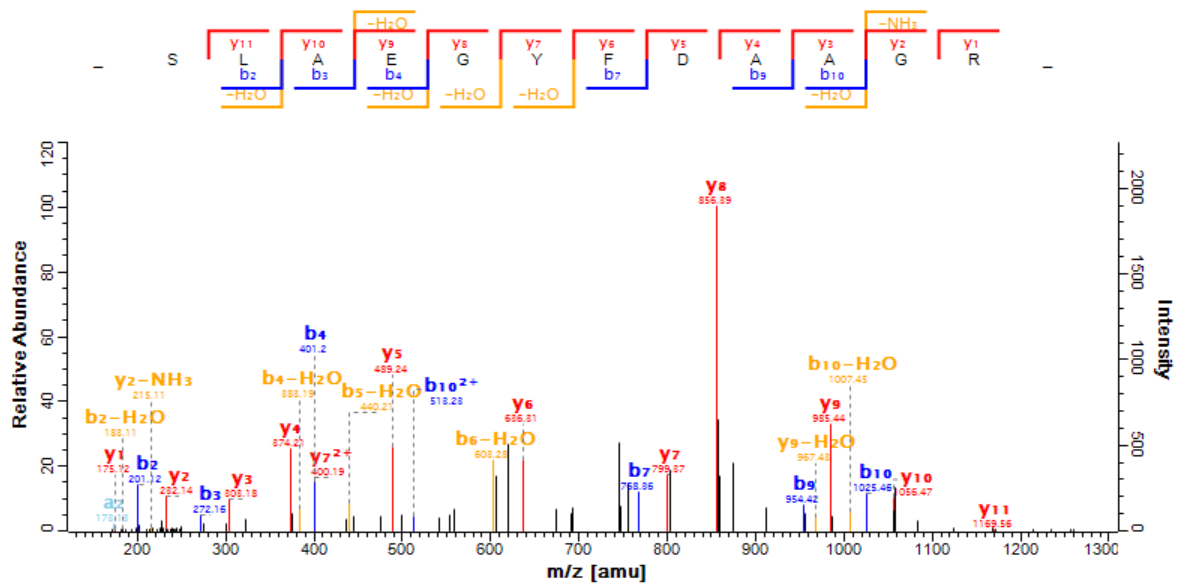

**Protein Group ID:** 672

**Protein Accession Numbers:** E9PI68; Q15005; E9PL01; E9PRB9

**Gene Names:** SPCS2

**Peptide Sequence:** FFDHSGTLVMDAYEPEISR

**Total Number of Spectra:** 1

**Number of Replicates (out of 10):** 1

**Best Match Score:** 113.29

**Best Match Posterior Error Probability:** 3.35E-05

**Best Match Spectrum:**

**Scan number** 4948      **Raw file** 20100927-KD-Batch4-Prt-OGE-WT-Frac13  
**Method** ITMS; CID      **Genenames** SPCS2

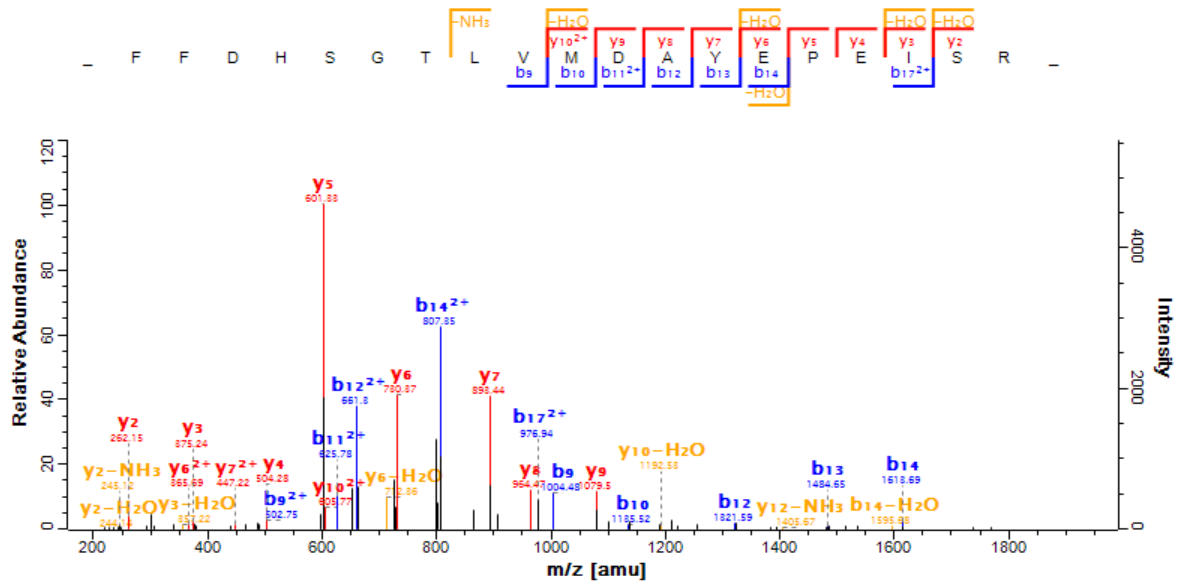

**Protein Group ID:** 673

**Protein Accession Numbers:** J3KNL3; Q9BWS9-2; Q9BWS9; Q9BWS9-3; E9PPA0; E9PPH0; E9PRL3; E9PIP0; E9PI70

**Gene Names:** CHID1

**Peptide Sequence:** FTQISPVWLQLK

**Total Number of Spectra:** 4

**Number of Replicates (out of 10):** 3

**Best Match Score:** 139.78

**Best Match Posterior Error Probability:** 6.76E-05

**Best Match Spectrum:**

|                    |           |                  |                                        |
|--------------------|-----------|------------------|----------------------------------------|
| <b>Scan number</b> | 5674      | <b>Raw file</b>  | 20100914-KD-Batch4-Prt-OGE-Mock-Frac19 |
| <b>Method</b>      | ITMS: CID | <b>Genenames</b> | CHID1                                  |

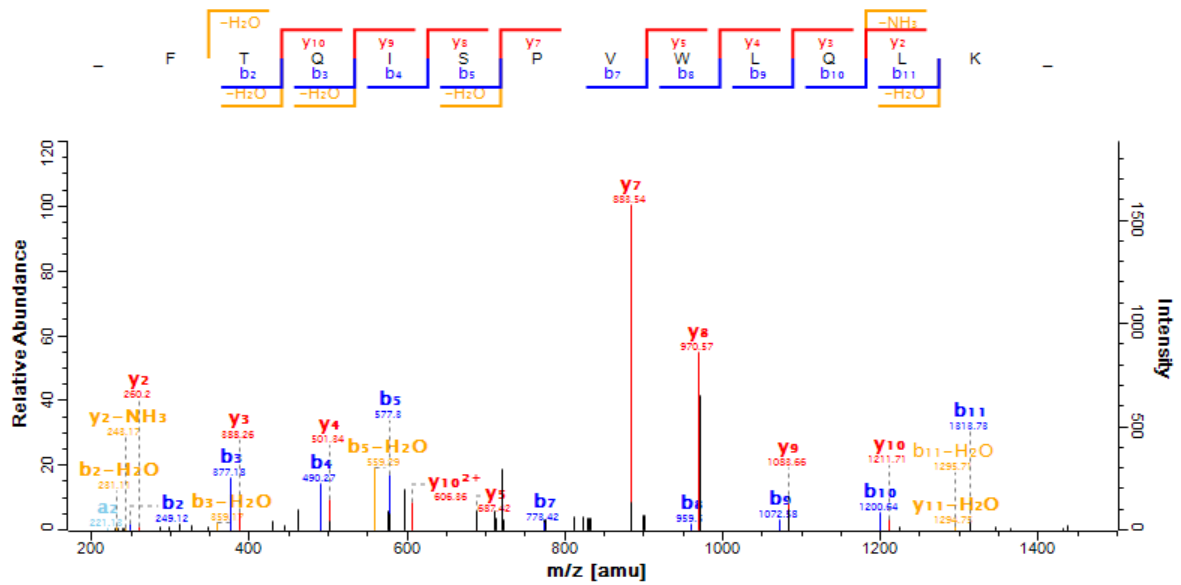



**Protein Group ID:** 676

**Protein Accession Numbers:** Q9Y6C9; E9PIE4

**Gene Names:** MTCH2

**Peptide Sequence:** ADAASQVLLGSLTILSQPLMYVK

**Total Number of Spectra:** 1

**Number of Replicates (out of 10):** 1

**Best Match Score:** 149.33

**Best Match Posterior Error Probability:** 7.52E-20

**Best Match Spectrum:**

**Scan number** 6834      **Raw file** Prt-OGE-Batch3--Mock-Frac1 8  
**Method** ITMS; CID      **Genenames** MTCH2

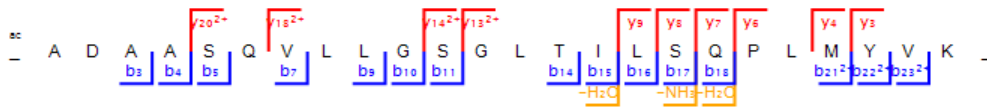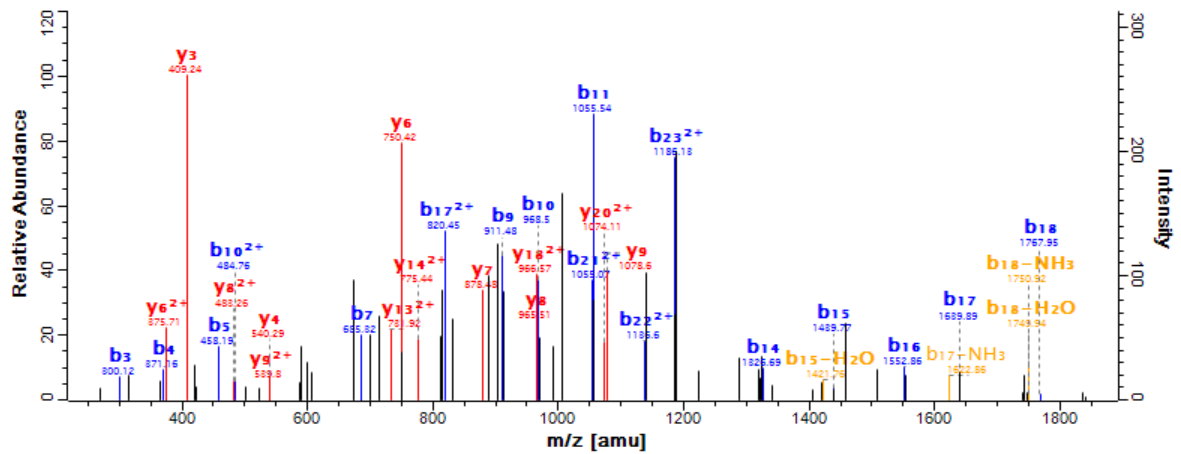

**Protein Group ID:** 681

**Protein Accession Numbers:** P08240; E9PJS4

**Gene Names:** SRPR

**Peptide Sequence:** LITVNTPLVLFVGEALVGN EAVDQLVK

**Total Number of Spectra:** 1

**Number of Replicates (out of 10):** 1

**Best Match Score:** 75.404

**Best Match Posterior Error Probability:** 6.32E-06

**Best Match Spectrum:**

**Scan number** 9187      **Raw file** 20100930-KD-Batch5-Prt-OGE-WT-Frac19  
**Method** ITMS; CID      **Genenames** SRPR

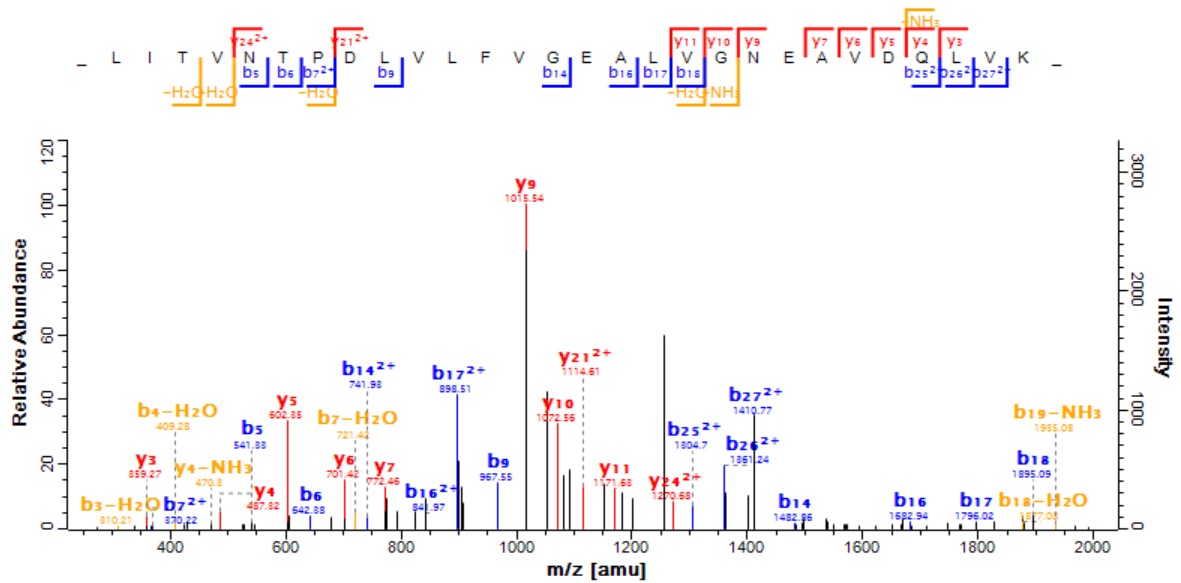

**Protein Group ID:** 693

**Protein Accession Numbers:** Q9BTE7; E9PM04

**Gene Names:** DCUN1D5

**Peptide Sequence:** TVHADLSNYDEDGAWPVLLEDFVEWQK

**Total Number of Spectra:** 1

**Number of Replicates (out of 10):** 1

**Best Match Score:** 55.526

**Best Match Posterior Error Probability:** 0.00076982

**Best Match Spectrum:**

**Scan number** 7068      **Raw file** OGE-Mock-Frac9  
**Method** ITMS; CID      **Genenames** DCUN1D5

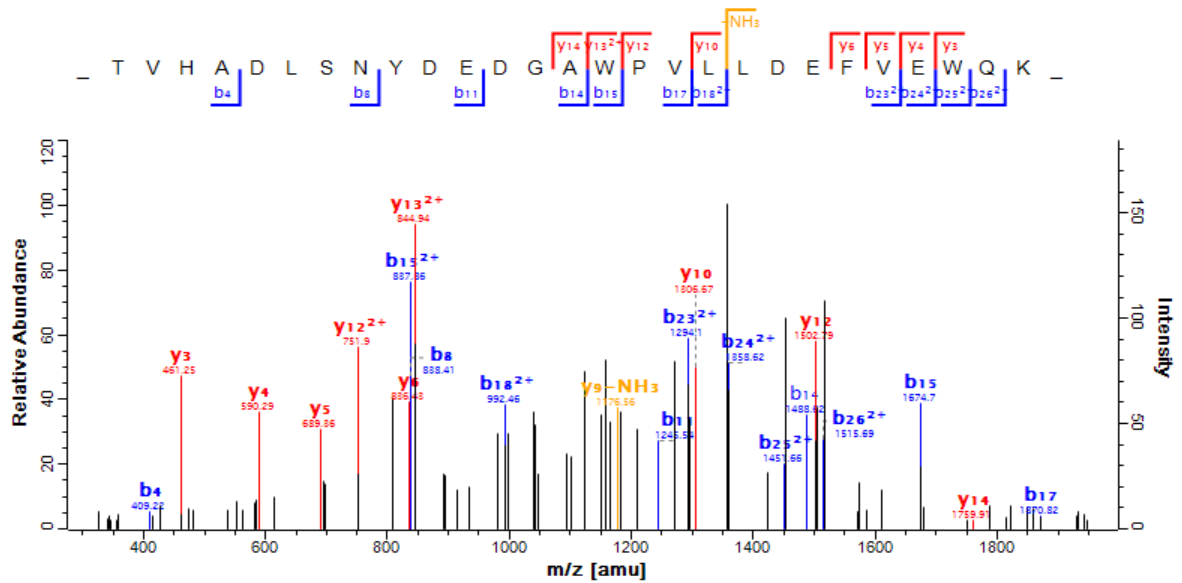

**Protein Group ID:** 694

**Protein Accession Numbers:** J3KPP7; P49407; P49407-2; E9PM35

**Gene Names:** ARRB1

**Peptide Sequence:** DFVDHIDLVDVDPVDGVVLVDPEYLK

**Total Number of Spectra:** 2

**Number of Replicates (out of 10):** 2

**Best Match Score:** 97.488

**Best Match Posterior Error Probability:** 5.73E-07

**Best Match Spectrum:**

|                    |           |                  |                             |
|--------------------|-----------|------------------|-----------------------------|
| <b>Scan number</b> | 7620      | <b>Raw file</b>  | Prt-OGE-Batch3--Mock-Frac13 |
| <b>Method</b>      | ITMS; CID | <b>Genenames</b> | ARRB1                       |

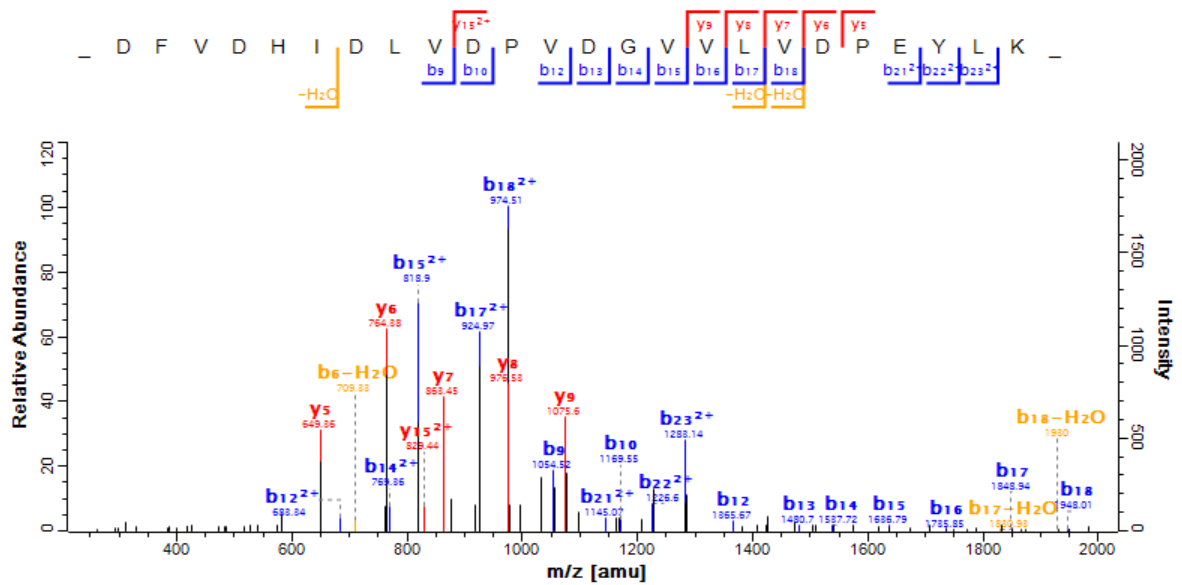

**Protein Group ID:** 698

**Protein Accession Numbers:** Q16798; E9PMB9

**Gene Names:** ME3

**Peptide Sequence:** HIPDEIFLLTAEQIAQEVSQHLSEGR

**Total Number of Spectra:** 1

**Number of Replicates (out of 10):** 1

**Best Match Score:** 92.913

**Best Match Posterior Error Probability:** 3.37E-09

**Best Match Spectrum:**

**Scan number** 7382      **Raw file** 20100917-KD-Batch5-Prt-OGE-Mock-Frac17  
**Method** ITMS; CID      **Genenames** ME3

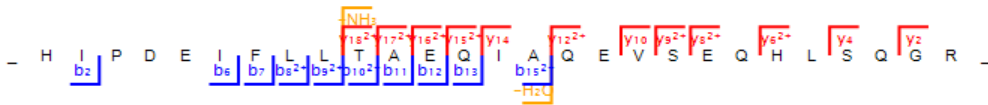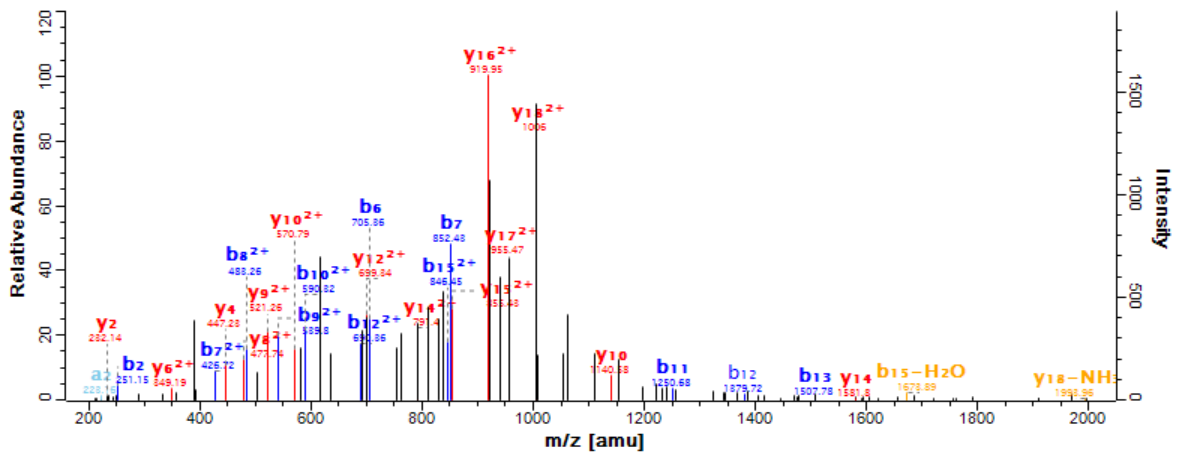

**Protein Group ID:** 703

**Protein Accession Numbers:** E9PN11; Q5JR05; P08134; Q5JR08; E9PQH6; Q5JR07; Q5JR06; E9PLA2

**Gene Names:** RHOC

**Peptide Sequence:** DQFPEVYVPTVFENYIADIEVDGK

**Total Number of Spectra:** 1

**Number of Replicates (out of 10):** 1

**Best Match Score:** 98.3

**Best Match Posterior Error Probability:** 4.80E-07

**Best Match Spectrum:**

|                    |           |                  |                                      |
|--------------------|-----------|------------------|--------------------------------------|
| <b>Scan number</b> | 8315      | <b>Raw file</b>  | 20100927-KD-Batch4-Prt-OGE-WT-Frac11 |
| <b>Method</b>      | ITMS; CID | <b>Genenames</b> | RHOC                                 |

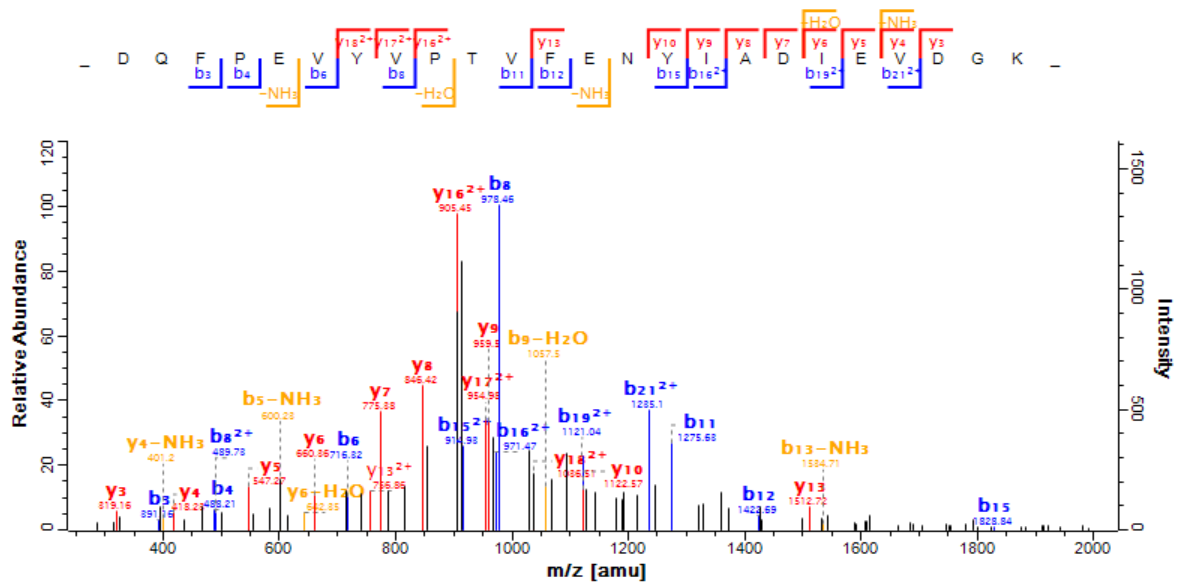

**Protein Group ID:** 707

**Protein Accession Numbers:** E9PR17; P13987; E9PNW4

**Gene Names:** CD59

**Peptide Sequence:** FEHCNFNDVTTR

**Total Number of Spectra:** 2

**Number of Replicates (out of 10):** 2

**Best Match Score:** 98.407

**Best Match Posterior Error Probability:** 0.00047859

**Best Match Spectrum:**

|                    |           |                  |                                      |
|--------------------|-----------|------------------|--------------------------------------|
| <b>Scan number</b> | 1817      | <b>Raw file</b>  | 20100927-KD-Batch4-Prt-OGE-WT-Frac11 |
| <b>Method</b>      | ITMS; CID | <b>Genenames</b> | CD59                                 |

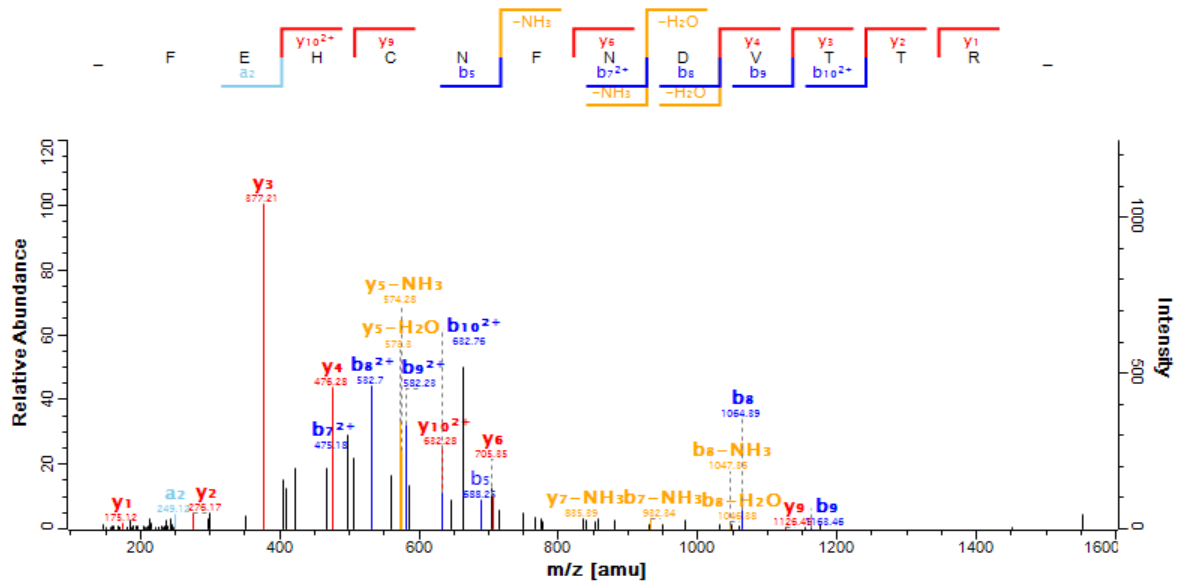

**Protein Group ID:** 708

**Protein Accession Numbers:** O00141-2; Q7Z3I4; E9PP33

**Gene Names:** DKFZp686H1615;SGK1

**Peptide Sequence:** MVNKDMNGFPVK

**Total Number of Spectra:** 1

**Number of Replicates (out of 10):** 1

**Best Match Score:** 77.744

**Best Match Posterior Error Probability:** 0.011865

**Best Match Spectrum:**

**Scan number** 5612      **Raw file** OGE-Mock-Frac3  
**Method** ITMS; CID      **Genenames** DKFZp686H1615;SGK1

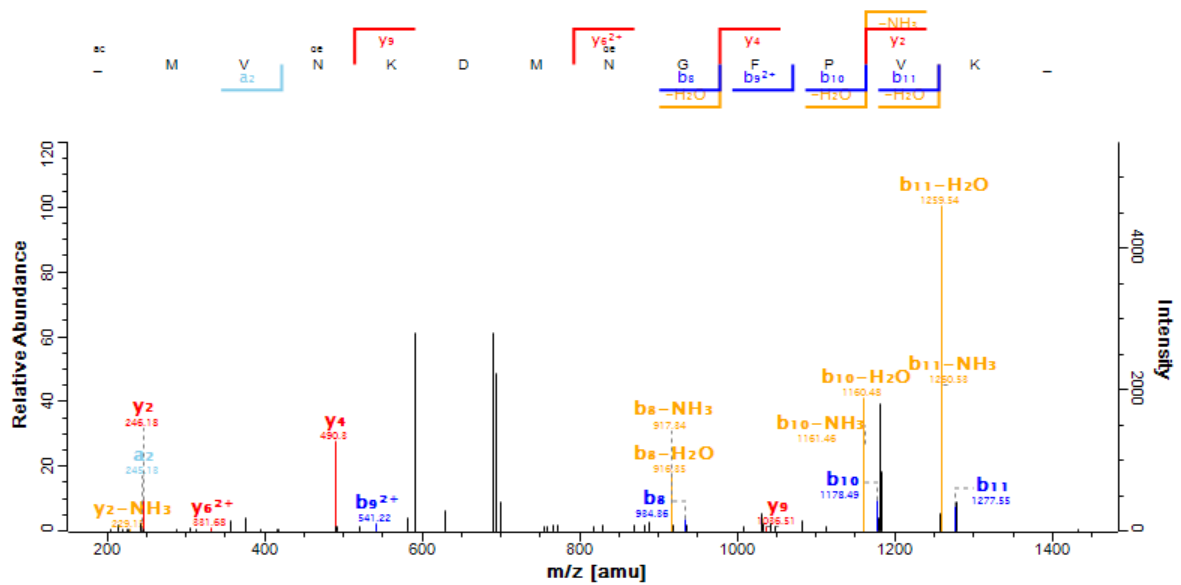



**Protein Group ID:** 711  
**Protein Accession Numbers:** Q9H2P0; E9PQK8  
**Gene Names:** ADNP  
**Peptide Sequence:** MFQLPVNNLGLR  
**Total Number of Spectra:** 1  
**Number of Replicates (out of 10):** 1  
**Best Match Score:** 101.53  
**Best Match Posterior Error Probability:** 0.00046758  
**Best Match Spectrum:**

**Scan number** 6247      **Raw file** 20100917-KD-Batch5-Prt-OGE-Mock-Frac21  
**Method** ITMS; CID      **Genenames** ADNP

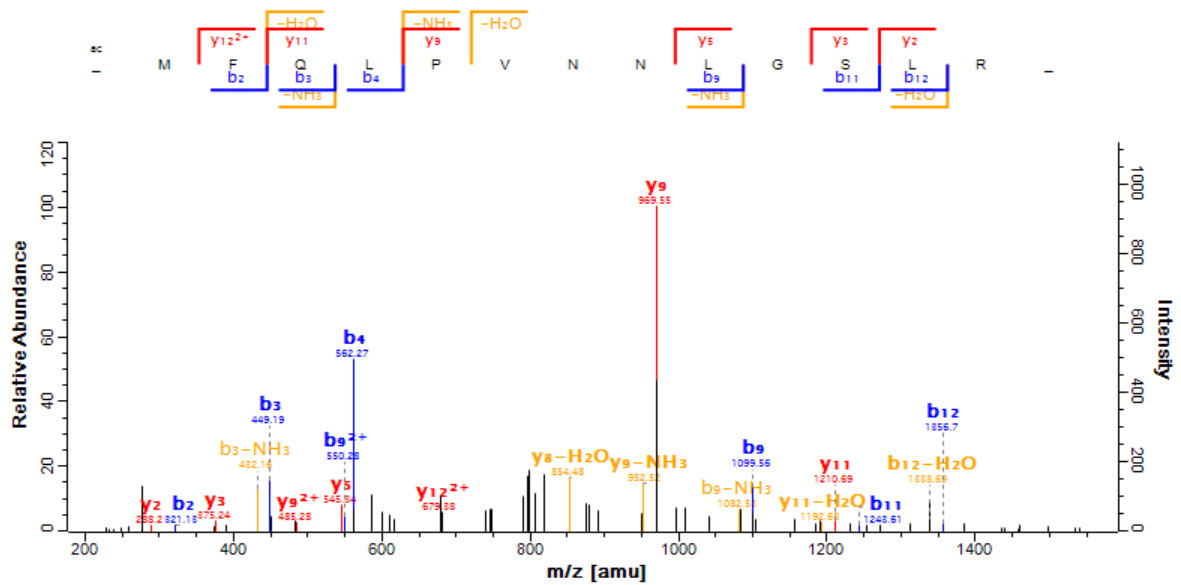

**Protein Group ID:** 714

**Protein Accession Numbers:** O14497; O14497-2; O14497-3; E9PQW6

**Gene Names:** ARID1A

**Peptide Sequence:** P Q P Y G G T N P Y S Q Q C G P P S G P Q Q H G Y P G Q P Y G S Q T P Q R

**Total Number of Spectra:** 1

**Number of Replicates (out of 10):** 1

**Best Match Score:** 41.491

**Best Match Posterior Error Probability:** 0.0066044

**Best Match Spectrum:**

**Scan number** 4718      **Raw file** 20100927-KD-Batch4-Prt-OGE-WT-Frac21  
**Method** ITMS; CID      **Genenames** ARID1A

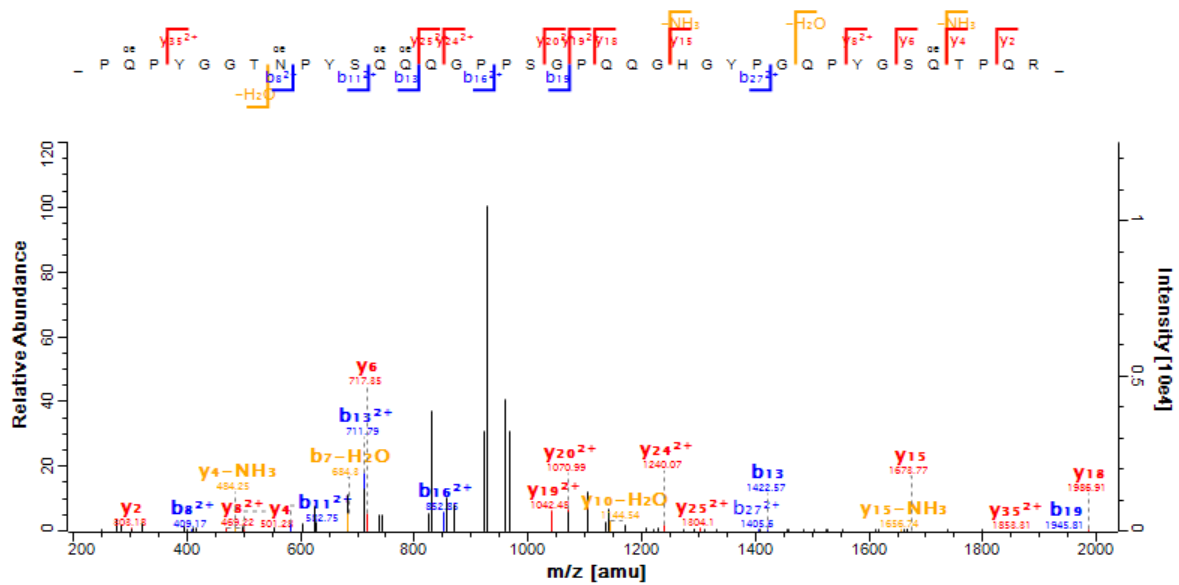

**Protein Group ID:** 719  
**Protein Accession Numbers:** Q8N3D4; E9PSB0  
**Gene Names:** EHBP1L1  
**Peptide Sequence:** EQLLLEELVSLVNQR  
**Total Number of Spectra:** 11  
**Number of Replicates (out of 10):** 7  
**Best Match Score:** 101.32  
**Best Match Posterior Error Probability:** 0.00011088  
**Best Match Spectrum:**

**Scan number** 6686      **Raw file** Prt-OGE-Batch3-WT-Frac7  
**Method** ITMS; CID      **Genenames** EHBP1L1

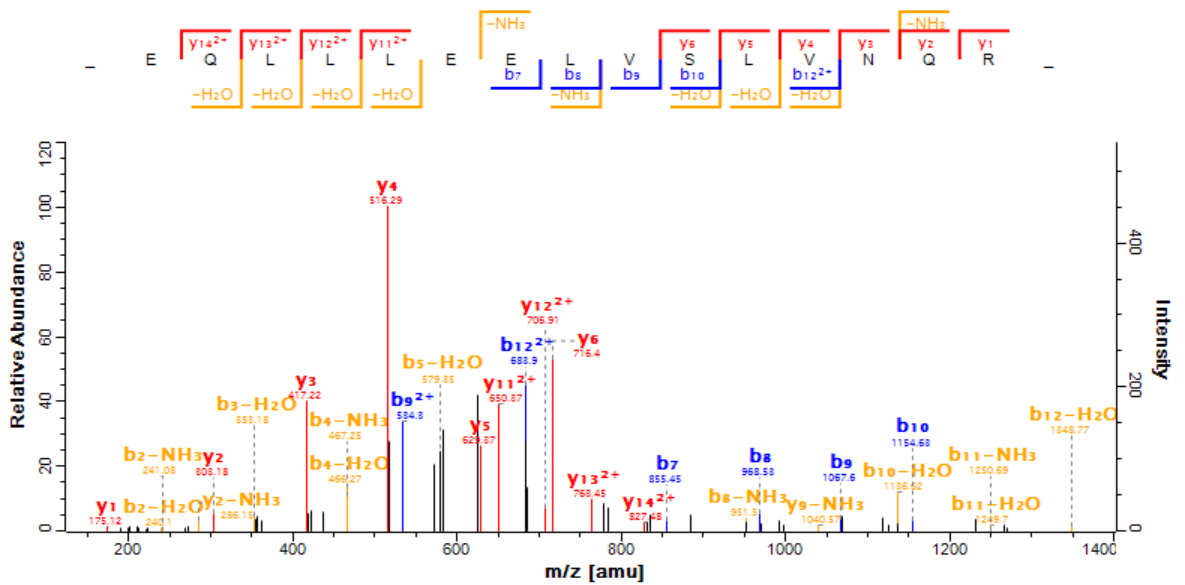

**Protein Group ID:** 720

**Protein Accession Numbers:** E9PSH4; Q9H063; H0YEV4

**Gene Names:** MAF1

**Peptide Sequence:** SISGSTYTPSEAGNELDMELGEEVVEEESR

**Total Number of Spectra:** 1

**Number of Replicates (out of 10):** 1

**Best Match Score:** 68.074

**Best Match Posterior Error Probability:** 7.59E-06

**Best Match Spectrum:**

|                    |           |                  |                                     |
|--------------------|-----------|------------------|-------------------------------------|
| <b>Scan number</b> | 4345      | <b>Raw file</b>  | 20100930-KD-Batch5-Prt-OGE-WT-Frac3 |
| <b>Method</b>      | ITMS; CID | <b>Genenames</b> | MAF1                                |

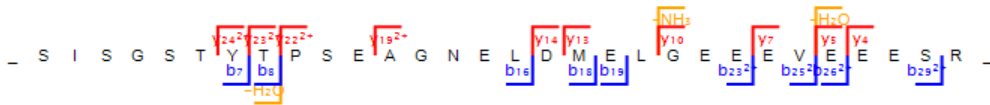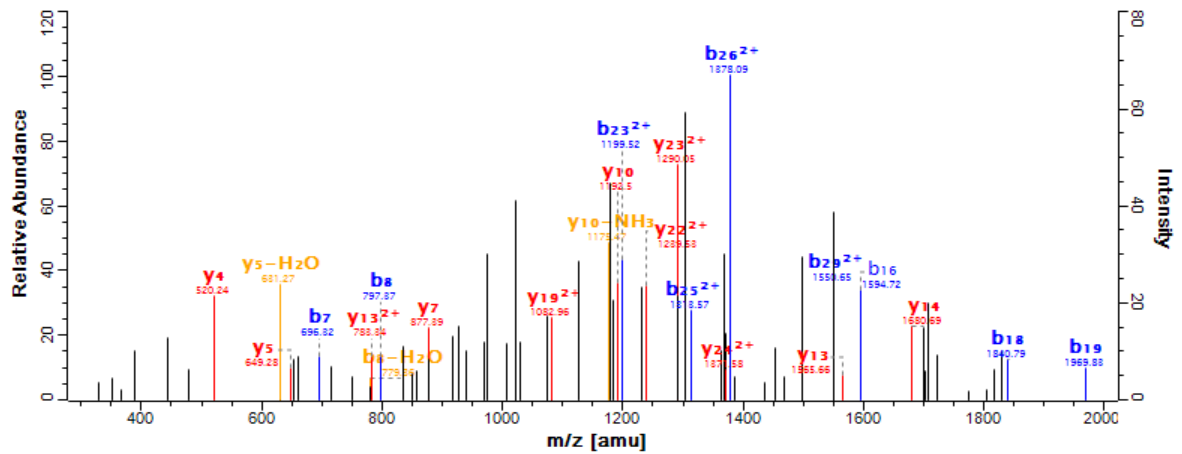

**Protein Group ID:** 721

**Protein Accession Numbers:** Q9Y2L1; Q9Y2L1-2; G3V1J5; F2Z2C0

**Gene Names:** DIS3

**Peptide Sequence:** AVHEDIVAVELLPK

**Total Number of Spectra:** 3

**Number of Replicates (out of 10):** 3

**Best Match Score:** 116.03

**Best Match Posterior Error Probability:** 0.00010693

**Best Match Spectrum:**

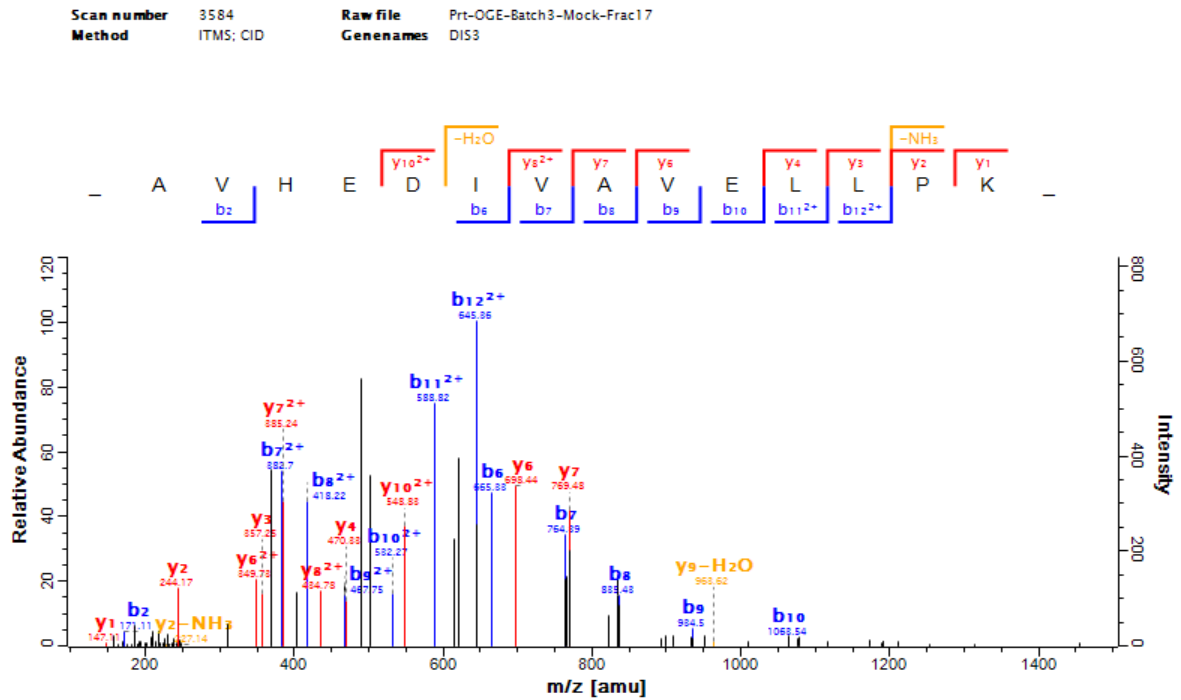

**Protein Group ID:** 722  
**Protein Accession Numbers:** P23025; F2Z2T2  
**Gene Names:** XPA  
**Peptide Sequence:** PYSATAAAATGGMANVK  
**Total Number of Spectra:** 1  
**Number of Replicates (out of 10):** 1  
**Best Match Score:** 180.7  
**Best Match Posterior Error Probability:** 3.12E-22  
**Best Match Spectrum:**

**Scan number** 2020      **Raw file** Prt-OGE-Batch3-WT-Frac14  
**Method** ITMS; CID      **Genenames** XPA

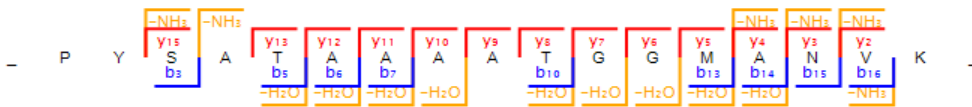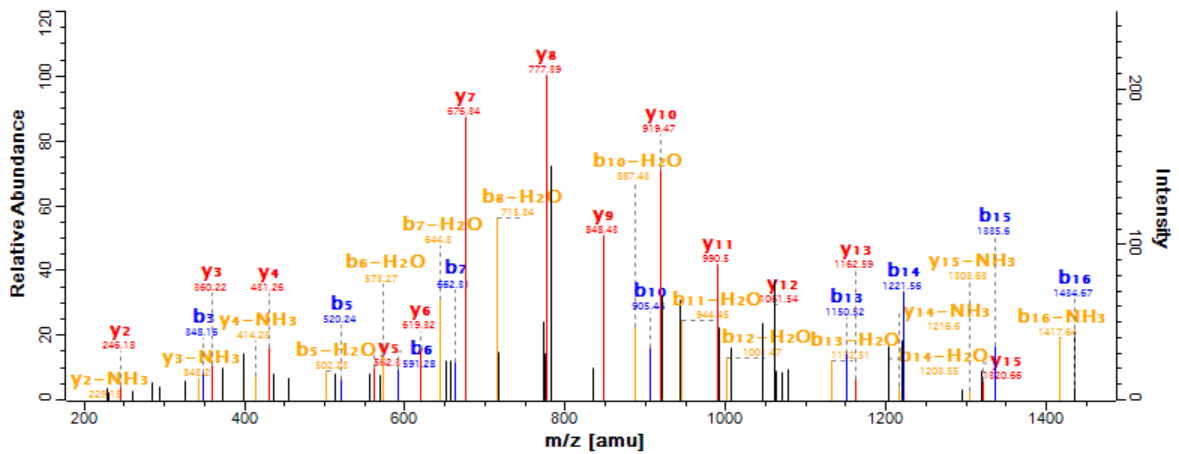

**Protein Group ID:** 731

**Protein Accession Numbers:** P10620; G5EA53; F5H6X2; F5H7F6; F5H613; F5GX73

**Gene Names:** MGST1

**Peptide Sequence:** VDLTQVMDDEVFMAFASYATIILSKMMLMSTATAFYR

**Total Number of Spectra:** 10

**Number of Replicates (out of 10):** 4

**Best Match Score:** 124.82

**Best Match Posterior Error Probability:** 4.36E-39

**Best Match Spectrum:**

|                    |           |                  |                                      |
|--------------------|-----------|------------------|--------------------------------------|
| <b>Scan number</b> | 10017     | <b>Raw file</b>  | 20100927-KD-Batch4-Prt-OGE-WT-Frac13 |
| <b>Method</b>      | ITMS; CID | <b>Genenames</b> | MGST1                                |

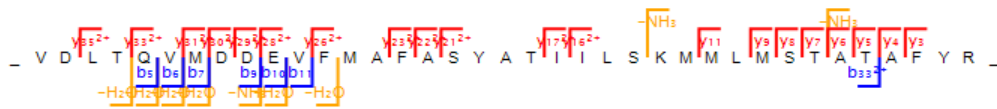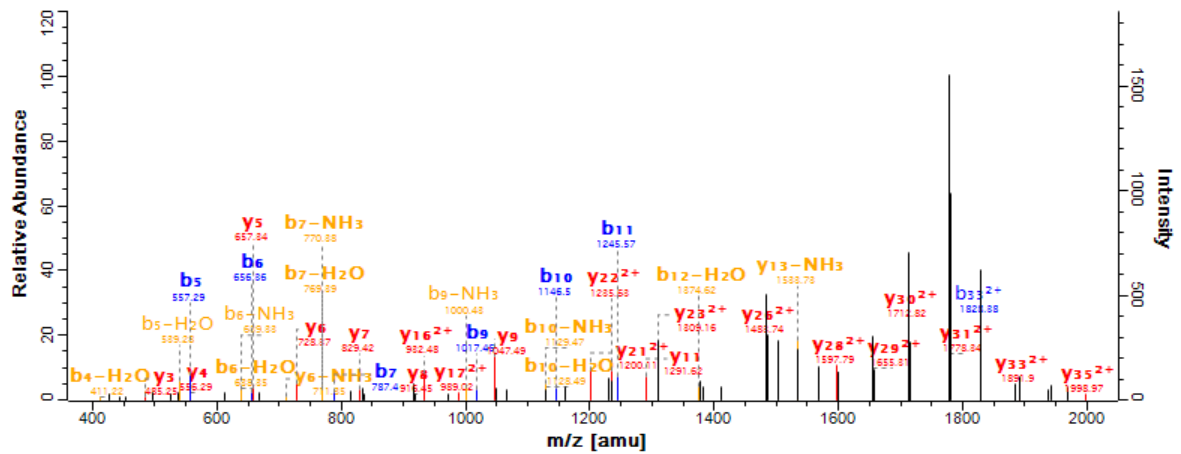

**Protein Group ID:** 732

**Protein Accession Numbers:** G5EA39; F5H6E4; P60006; F5H3R3; F8WDQ6; F5H2T3; F5GXB9

**Gene Names:** C11orf51;ANAPC15

**Peptide Sequence:** STLFP SLFPR

**Total Number of Spectra:** 7

**Number of Replicates (out of 10):** 5

**Best Match Score:** 91.584

**Best Match Posterior Error Probability:** 0.00097898

**Best Match Spectrum:**

**Scan number** 6053      **Raw file** 20100927-KD-Batch4-Prt-OGE-WT-Frac3  
**Method** ITMS: CID      **Genenames** C11orf51;ANAPC15

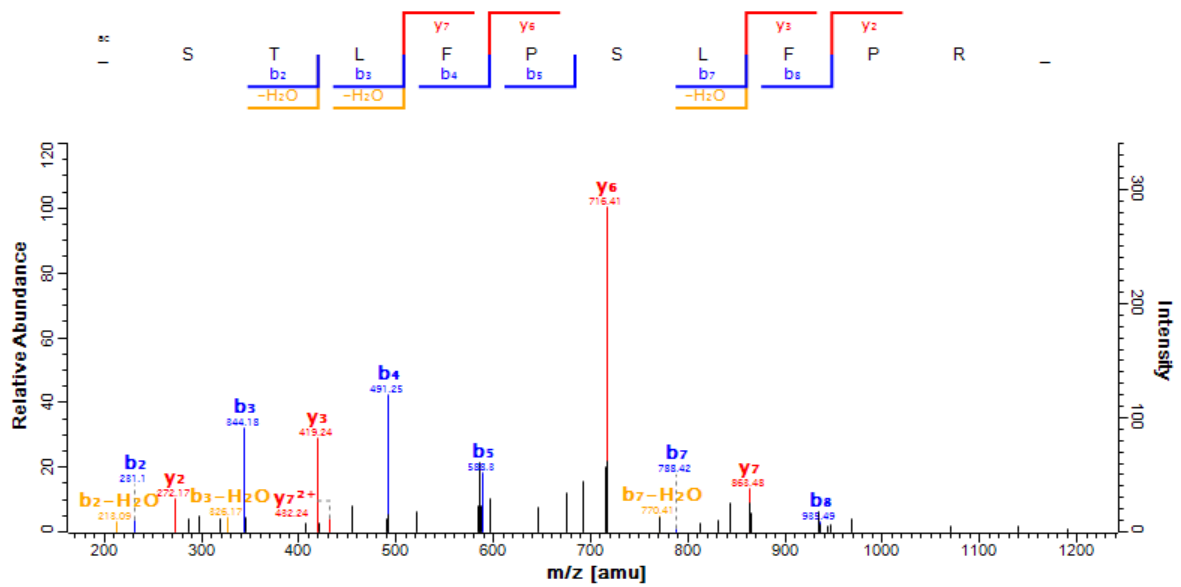



**Protein Group ID:** 736

**Protein Accession Numbers:** F5GXR3; P20962; F5H7R9

**Gene Names:** PTMS

**Peptide Sequence:** SVEAAAELSAK

**Total Number of Spectra:** 158

**Number of Replicates (out of 10):** 10

**Best Match Score:** 251.34

**Best Match Posterior Error Probability:** 1.44E-71

**Best Match Spectrum:**

**Scan number** 1745      **Raw file** OGEWT-Frac4  
**Method** ITMS; CID      **Genenames** PTMS

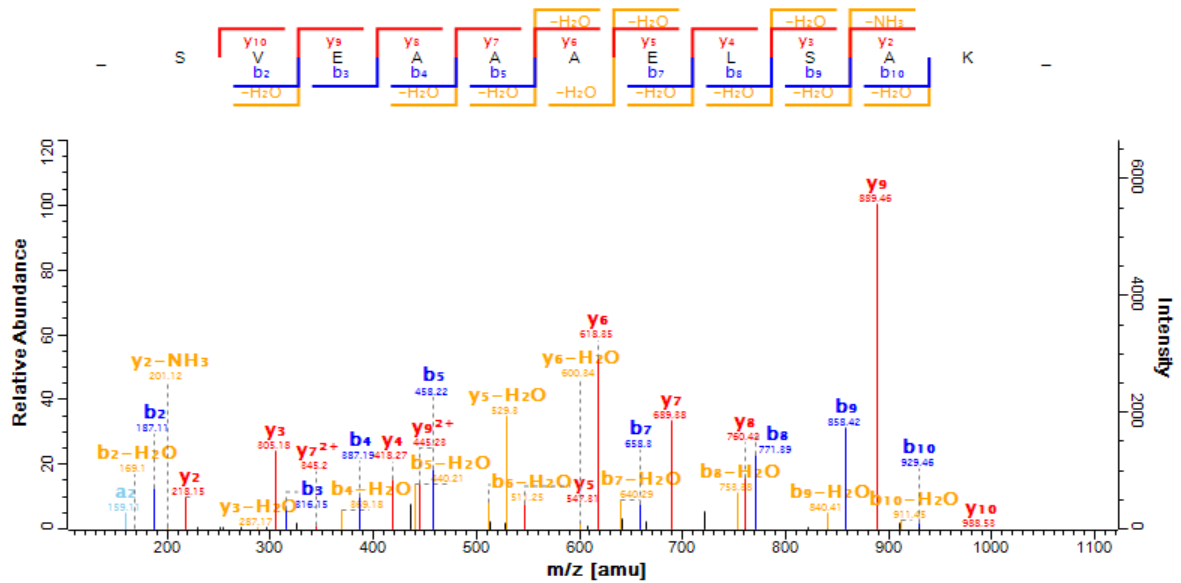

**Protein Group ID:** 737

**Protein Accession Numbers:** O14593; J3KPZ8; Q24JQ1; O14593-2; F5H1K6; F5GY33; H0YGQ6

**Gene Names:** RFXANK

**Peptide Sequence:** FLLEWGADPILAK

**Total Number of Spectra:** 2

**Number of Replicates (out of 10):** 2

**Best Match Score:** 121.02

**Best Match Posterior Error Probability:** 7.37E-05

**Best Match Spectrum:**

|                    |           |                  |                |
|--------------------|-----------|------------------|----------------|
| <b>Scan number</b> | 5530      | <b>Raw file</b>  | OGE-Mock-Frac3 |
| <b>Method</b>      | ITMS; CID | <b>Genenames</b> | RFXANK         |

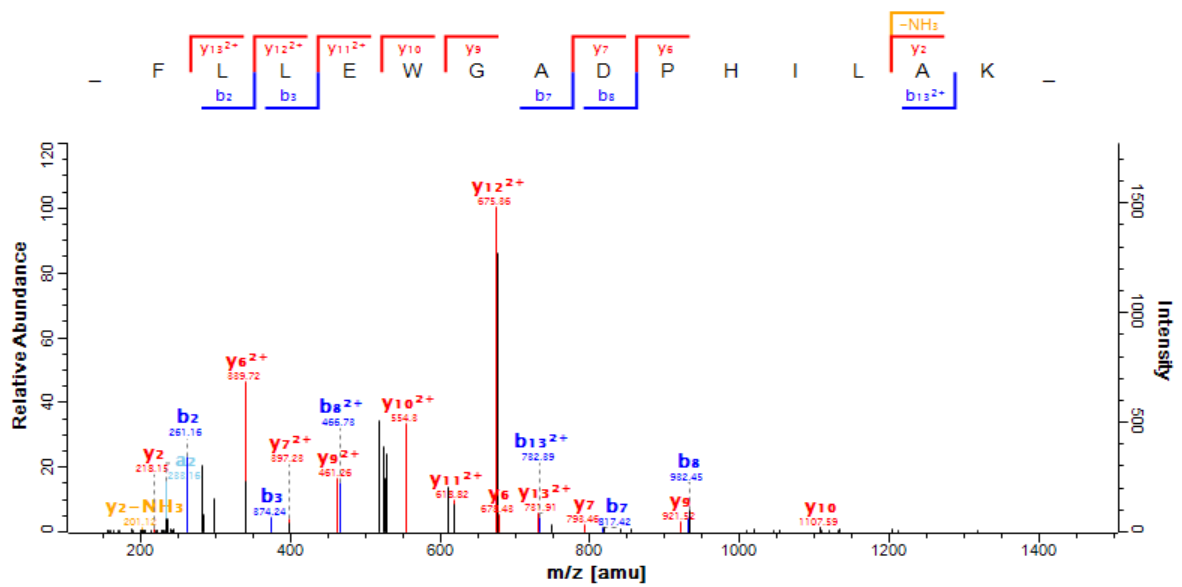

**Protein Group ID:** 738

**Protein Accession Numbers:** Q02978; I3L1P8; F5GY65

**Gene Names:** SLC25A11

**Peptide Sequence:** AATASAGAGGIDGKPR

**Total Number of Spectra:** 2

**Number of Replicates (out of 10):** 1

**Best Match Score:** 121.32

**Best Match Posterior Error Probability:** 0.00031605

**Best Match Spectrum:**

**Scan number** 1362      **Raw file** 20100930-KD-Batch5-Prt-OGE-WT-Frac16  
**Method** ITMS; CID      **Genenames** SLC25A11

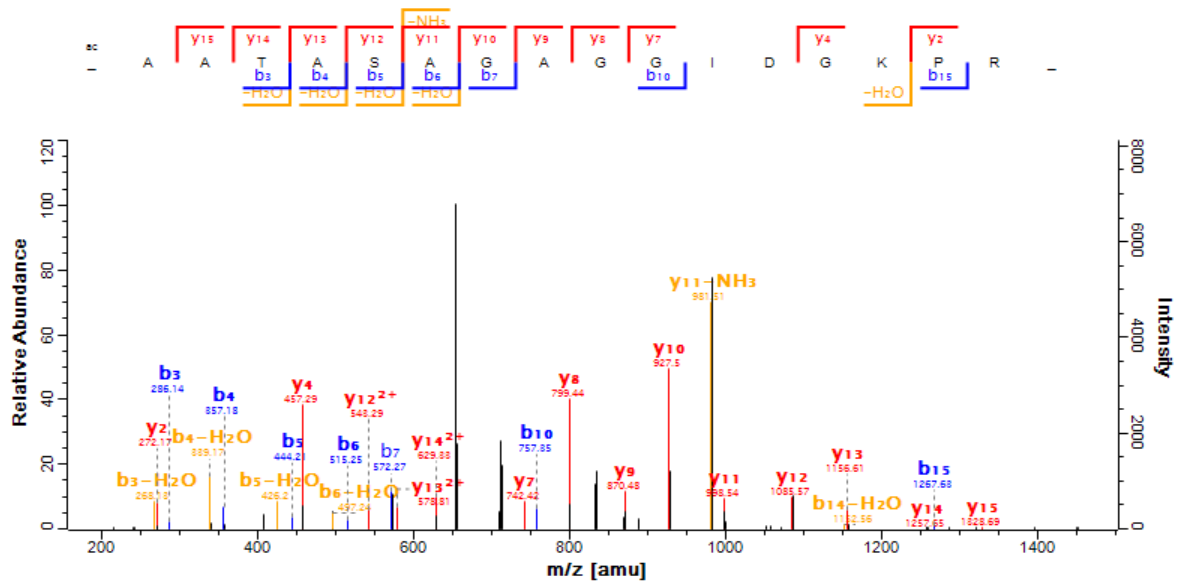

**Protein Group ID:** 739

**Protein Accession Numbers:** O14519; F5GYA4; F5GZF0

**Gene Names:** CDK2AP1

**Peptide Sequence:** YAELLAIEELGK

**Total Number of Spectra:** 18

**Number of Replicates (out of 10):** 7

**Best Match Score:** 152.74

**Best Match Posterior Error Probability:** 8.12E-06

**Best Match Spectrum:**

**Scan number** 7468      **Raw file** 20100917-KD-Batch5-Prt-OGE-Mock-Frac22  
**Method** ITMS; CID      **Genenames** CDK2AP1

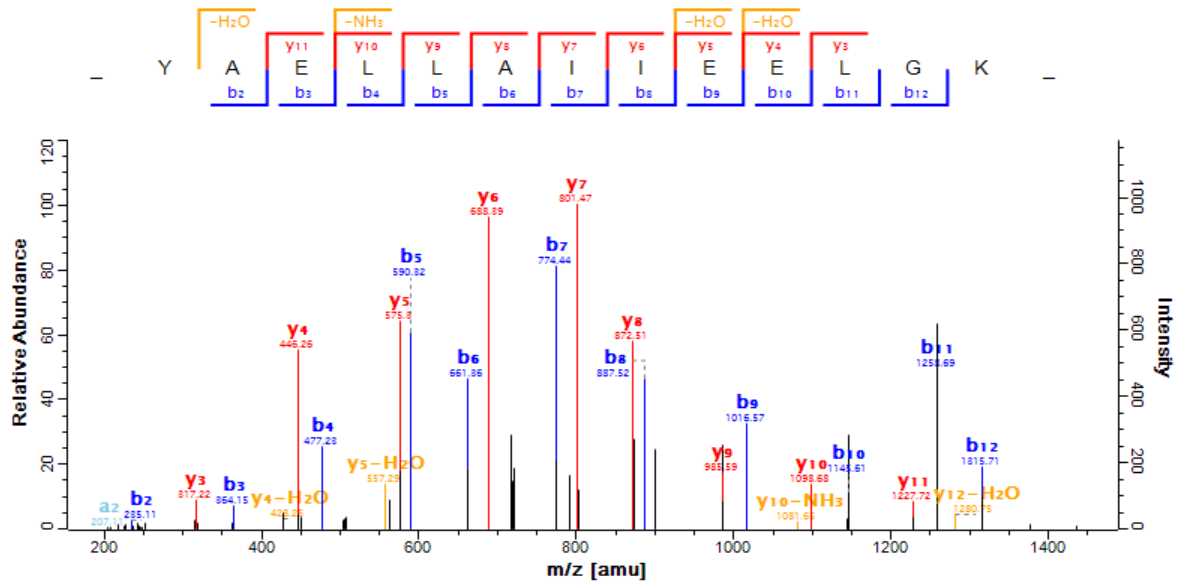

**Protein Group ID:** 740  
**Protein Accession Numbers:** Q9NX18; F5GYJ5  
**Gene Names:** SDHAF2  
**Peptide Sequence:** APDLEYLF EKPR  
**Total Number of Spectra:** 3  
**Number of Replicates (out of 10):** 2  
**Best Match Score:** 107.85  
**Best Match Posterior Error Probability:** 0.0006479  
**Best Match Spectrum:**

**Scan number** 4493      **Raw file** 20100914-KD-Batch4-Prt-OGE-Mock-Frac8  
**Method** ITMS; CID      **Genenames** SDHAF2

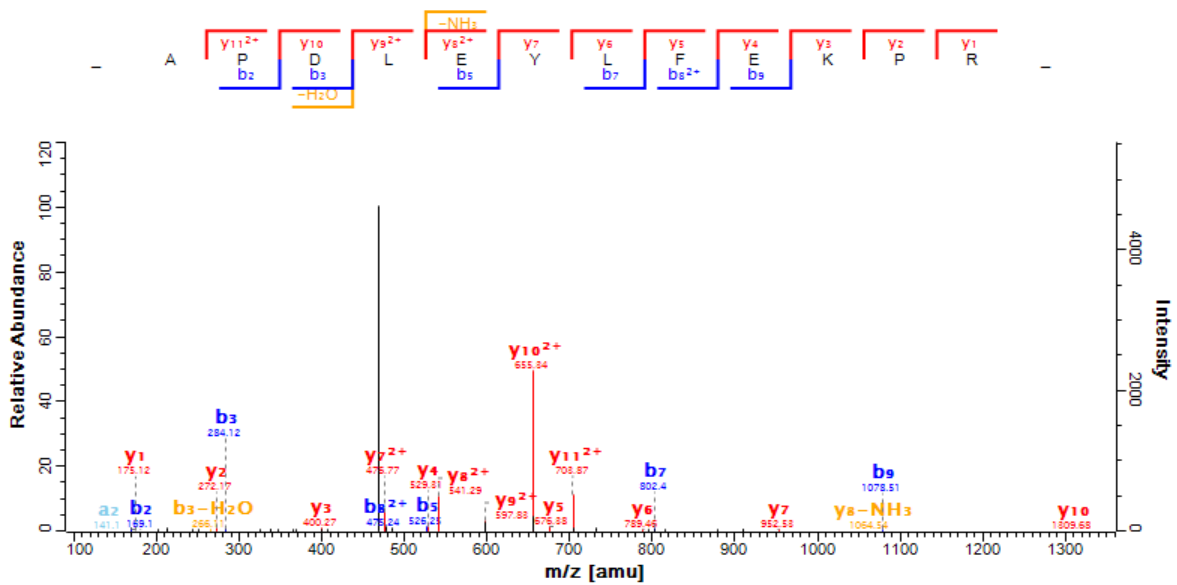

**Protein Group ID:** 744

**Protein Accession Numbers:** F5GZE1; Q8N4X5-4; Q8N4X5; Q8N4X5-2

**Gene Names:** AFAP1L2

**Peptide Sequence:** ALEQLLTELDDFLK

**Total Number of Spectra:** 4

**Number of Replicates (out of 10):** 2

**Best Match Score:** 183.41

**Best Match Posterior Error Probability:** 1.11E-15

**Best Match Spectrum:**

**Scan number** 7583      **Raw file** OGE-WT-Frac9  
**Method** ITMS; CID      **Genenames** AFAP1L2

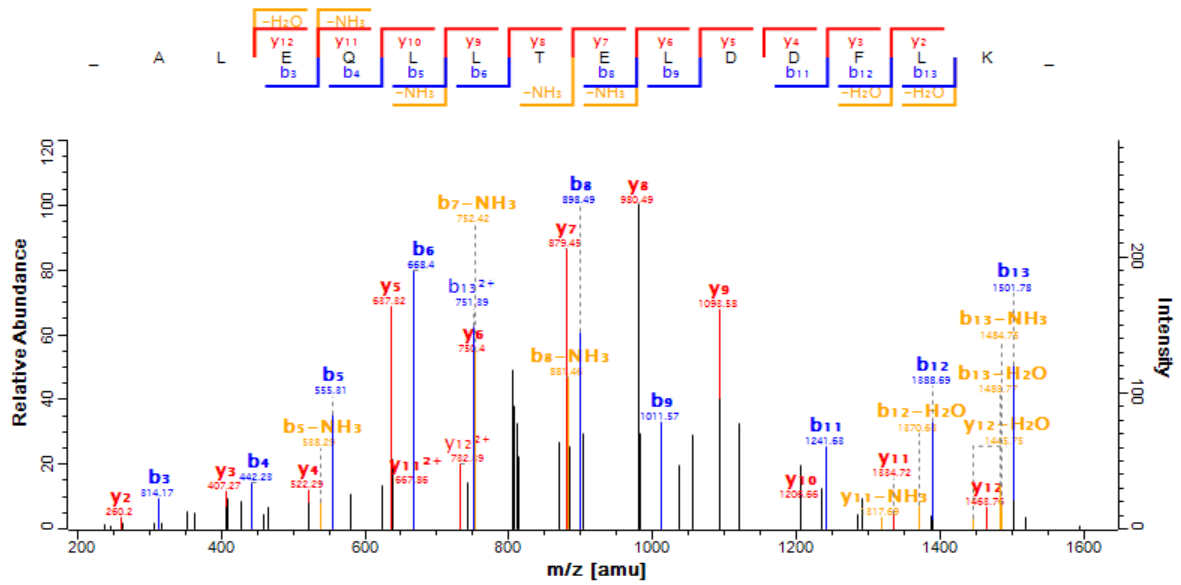

**Protein Group ID:** 745

**Protein Accession Numbers:** Q86YW0; F5H2Y6; Q86YW0-3; F5GZK3

**Gene Names:** PLCZ1

**Peptide Sequence:** AIAFEIIQK

**Total Number of Spectra:** 1

**Number of Replicates (out of 10):** 1

**Best Match Score:** 95.099

**Best Match Posterior Error Probability:** 0.0011986

**Best Match Spectrum:**

|                    |           |                  |                           |
|--------------------|-----------|------------------|---------------------------|
| <b>Scan number</b> | 5322      | <b>Raw file</b>  | Prt-OGE-Batch3-Mock-Frac7 |
| <b>Method</b>      | ITMS; CID | <b>Genenames</b> | PLCZ1                     |

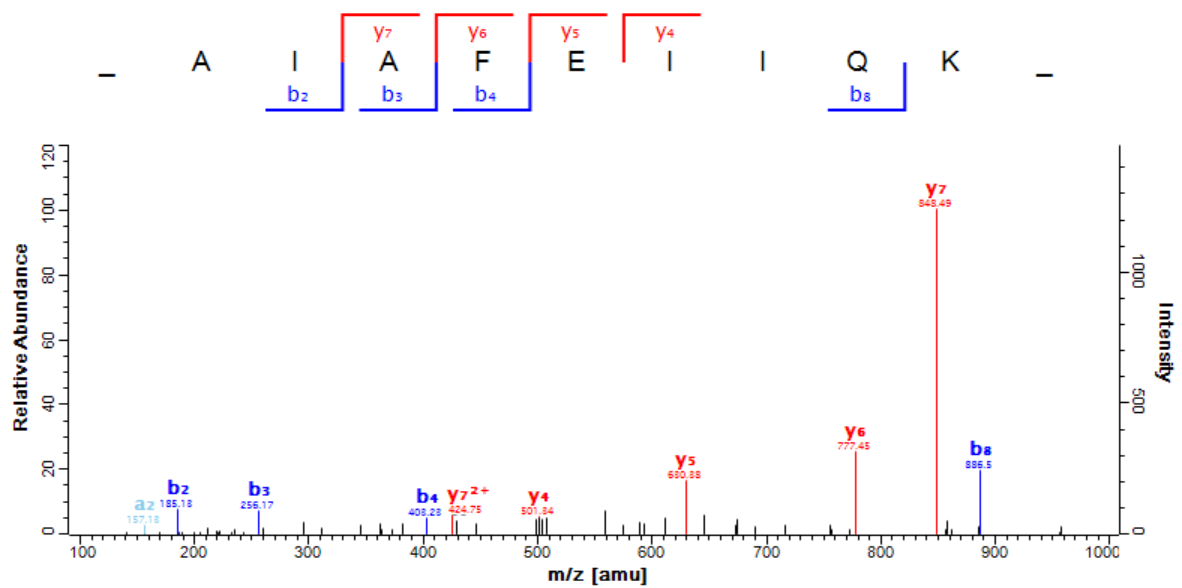

**Protein Group ID:** 747

**Protein Accession Numbers:** Q9H267; F5H008; G3V3F9

**Gene Names:** VPS33B

**Peptide Sequence:** AFPHRPDAPELPDFSMLK

**Total Number of Spectra:** 1

**Number of Replicates (out of 10):** 1

**Best Match Score:** 128.74

**Best Match Posterior Error Probability:** 8.49E-05

**Best Match Spectrum:**

**Scan number** 5636      **Raw file** 20100927-KD-Batch4-Prt-OGE-WT-Frac14  
**Method** ITMS; CID      **Genenames** VPS33B

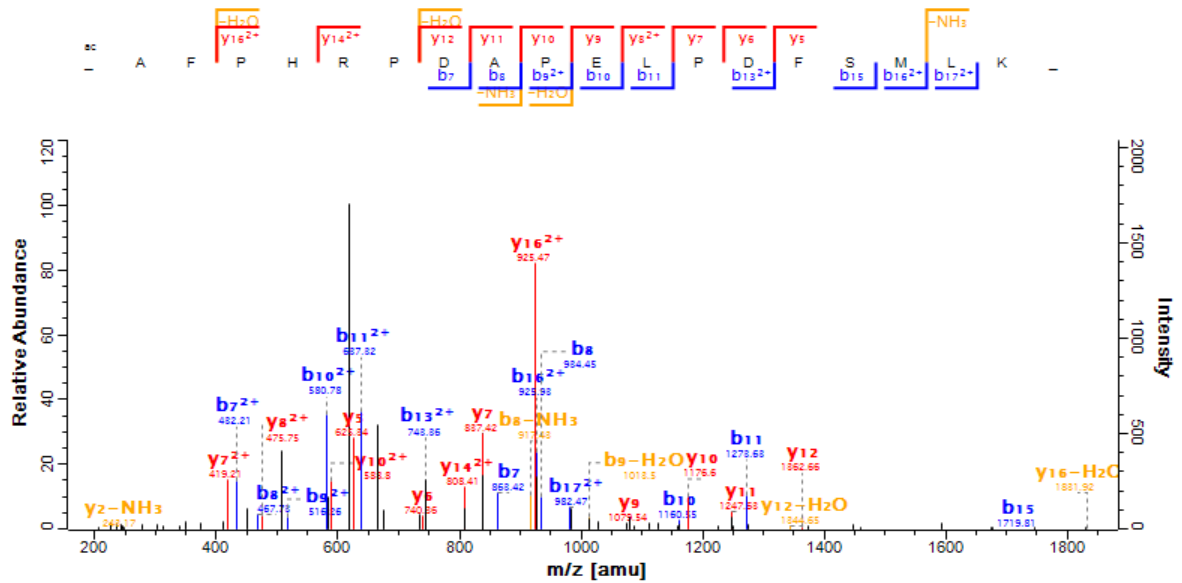



**Protein Group ID:** 750

**Protein Accession Numbers:** O14576; O14576-2; G5E9K1; O14576-3; F5H050

**Gene Names:** DYNC111

**Peptide Sequence:** TPLSAAATHPVYCVNVVVG TQNAHNLITVSTDGK

**Total Number of Spectra:** 1

**Number of Replicates (out of 10):** 1

**Best Match Score:** 55.428

**Best Match Posterior Error Probability:** 8.38E-05

**Best Match Spectrum:**

|                    |           |                  |                                     |
|--------------------|-----------|------------------|-------------------------------------|
| <b>Scan number</b> | 4030      | <b>Raw file</b>  | 20100930-KD-Batch5-Prt-OGE-WT-Frac9 |
| <b>Method</b>      | ITMS; CID | <b>Genenames</b> | DYNC111                             |

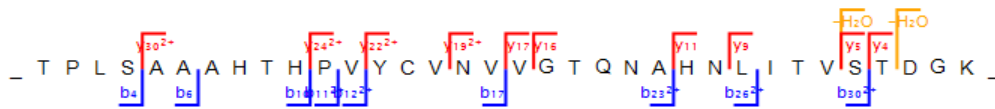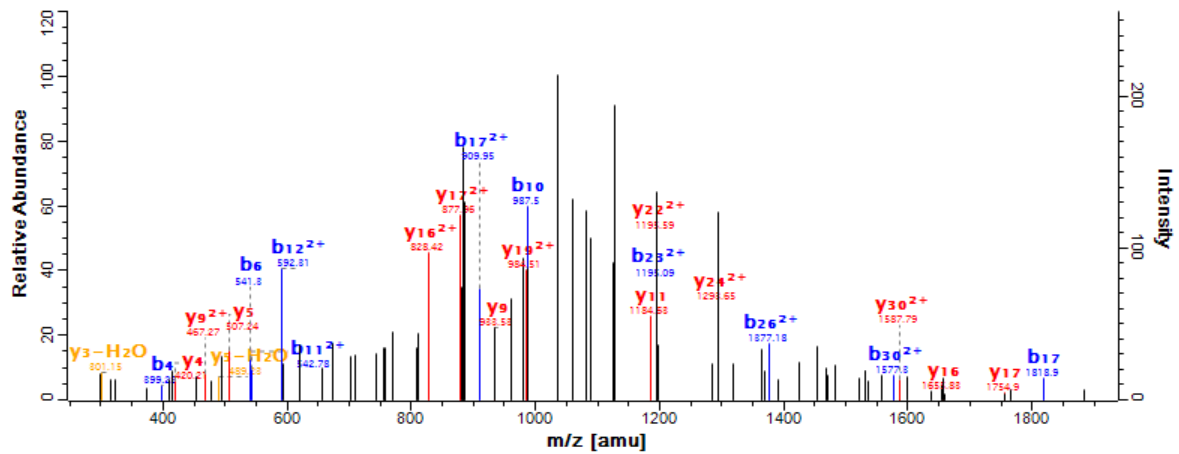

**Protein Group ID:** 754

**Protein Accession Numbers:** Q9Y653; Q9Y653-2; F5H144; H3BRH0; H3BV52; H3BSJ6

**Gene Names:** GPR56

**Peptide Sequence:** DLQLLSQFLK

**Total Number of Spectra:** 5

**Number of Replicates (out of 10):** 3

**Best Match Score:** 118.9

**Best Match Posterior Error Probability:** 0.00013522

**Best Match Spectrum:**

**Scan number** 6339      **Raw file** 20100914-KD-Batch4-Prt-OGE-Mock-Frac16  
**Method** ITMS; CID      **Genenames** GPR56

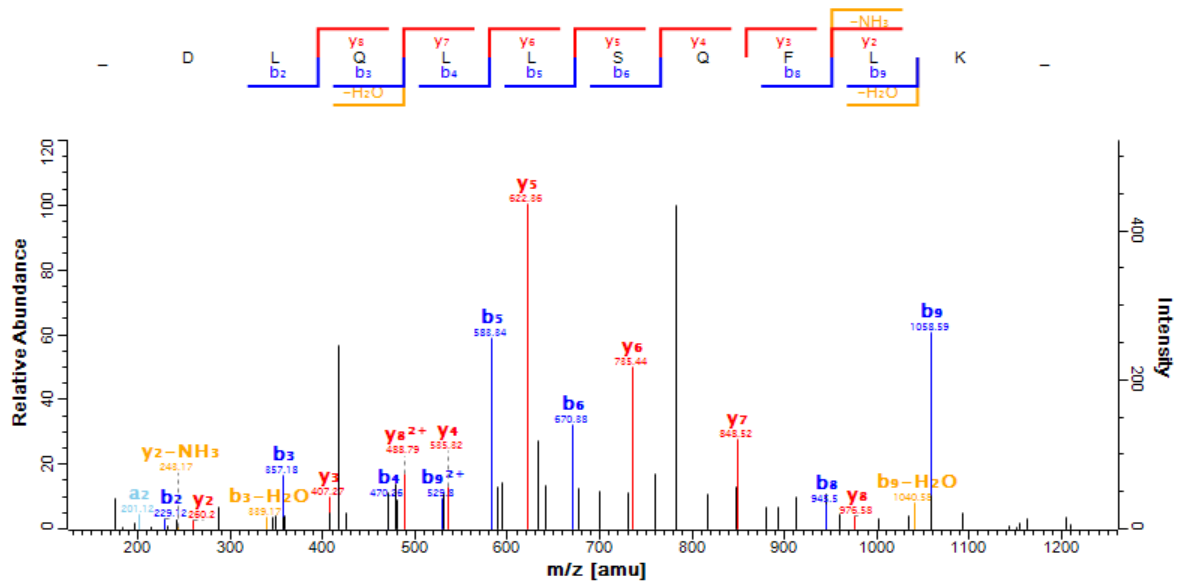

**Protein Group ID:** 755

**Protein Accession Numbers:** P07864; G3XAP5; F5H155; F5GZ11

**Gene Names:** LDHC

**Peptide Sequence:** IVIVTAGAR

**Total Number of Spectra:** 1

**Number of Replicates (out of 10):** 1

**Best Match Score:** 113.71

**Best Match Posterior Error Probability:** 0.00038235

**Best Match Spectrum:**

|                    |           |                  |              |
|--------------------|-----------|------------------|--------------|
| <b>Scan number</b> | 2213      | <b>Raw file</b>  | OGE-WT-Frac3 |
| <b>Method</b>      | ITMS; CID | <b>Genenames</b> | LDHC         |

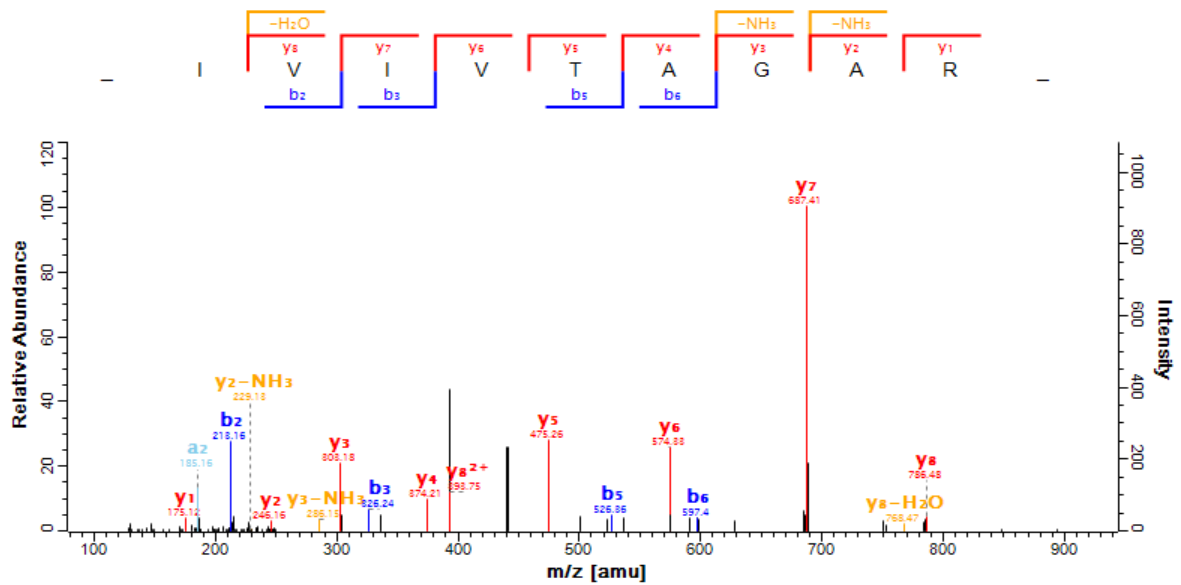

**Protein Group ID:** 759

**Protein Accession Numbers:** Q7LBC6; Q7LBC6-2; F5H275; Q7LBC6-3

**Gene Names:** KDM3B

**Peptide Sequence:** ASLPNFDLHILASVVENK

**Total Number of Spectra:** 11

**Number of Replicates (out of 10):** 8

**Best Match Score:** 110.04

**Best Match Posterior Error Probability:** 0.00011908

**Best Match Spectrum:**

**Scan number** 7918      **Raw file** 20100917-KD-Batch5-Prt-OGE-Mock-Frac16  
**Method** ITMS; CID      **Genenames** KDM3B

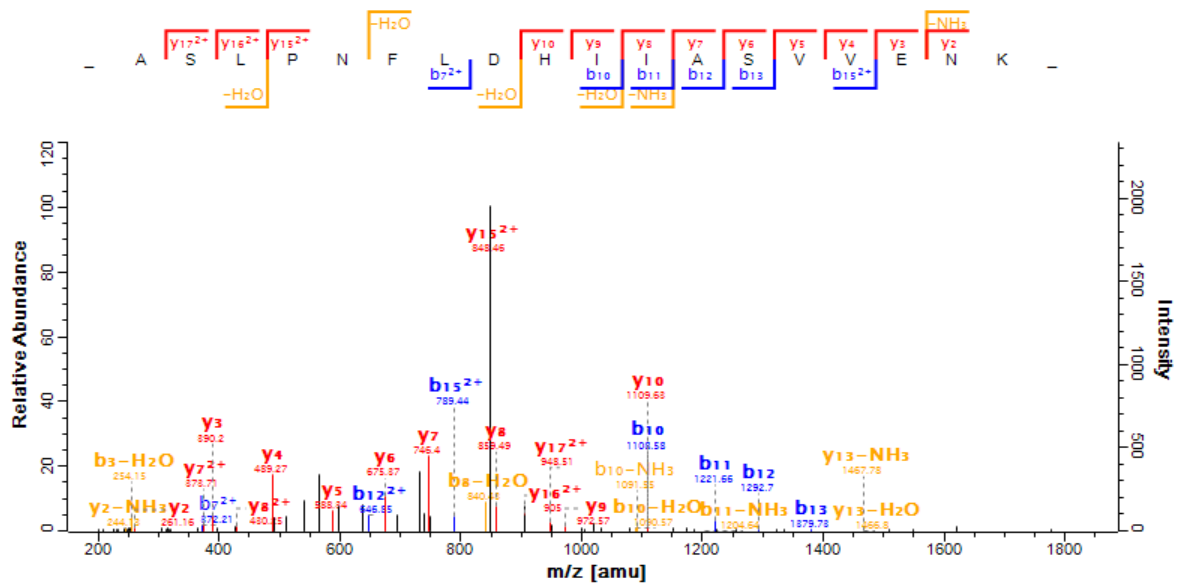

**Protein Group ID:** 771  
**Protein Accession Numbers:** Q9P2K6; F5H523  
**Gene Names:** KLHDC5  
**Peptide Sequence:** MSAEEMVQIR  
**Total Number of Spectra:** 1  
**Number of Replicates (out of 10):** 1  
**Best Match Score:** 57.348  
**Best Match Posterior Error Probability:** 0.026632  
**Best Match Spectrum:**

|                    |           |                  |             |
|--------------------|-----------|------------------|-------------|
| <b>Scan number</b> | 2306      | <b>Raw file</b>  | OGEWT-Frac4 |
| <b>Method</b>      | ITMS; CID | <b>Genenames</b> | KLHDC5      |

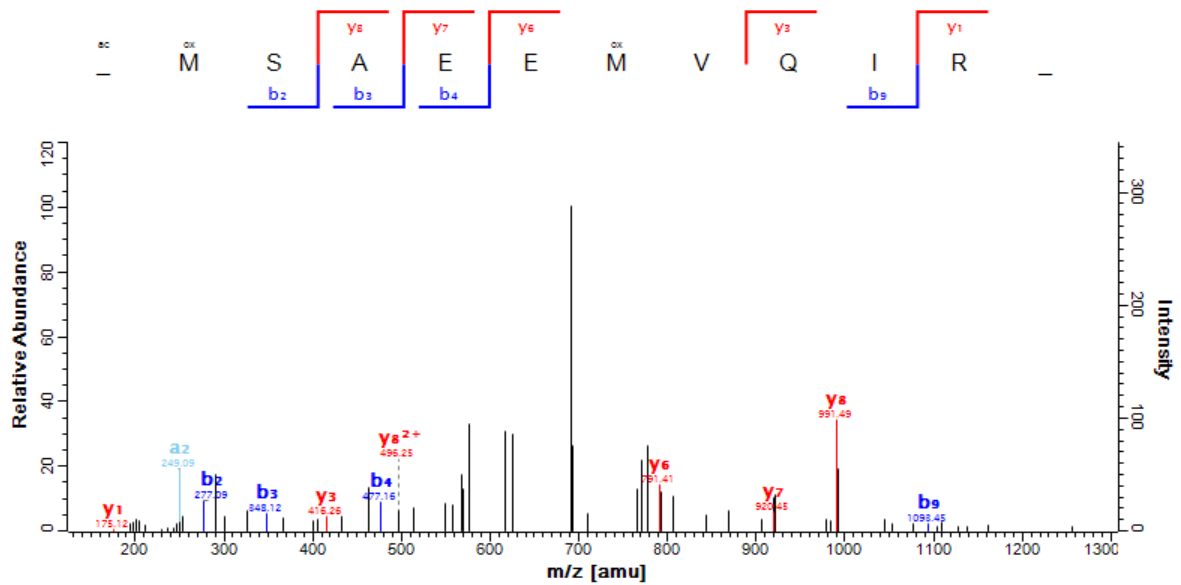

**Protein Group ID:** 772  
**Protein Accession Numbers:** F5H555  
**Gene Names:** CASC1  
**Peptide Sequence:** MNTFISLWK  
**Total Number of Spectra:** 16  
**Number of Replicates (out of 10):** 6  
**Best Match Score:** 96.948  
**Best Match Posterior Error Probability:** 0.0009101  
**Best Match Spectrum:**

|                    |           |                  |                          |
|--------------------|-----------|------------------|--------------------------|
| <b>Scan number</b> | 3511      | <b>Raw file</b>  | Prt-OGE-Batch3-WT-Frac16 |
| <b>Method</b>      | ITMS; CID | <b>Genenames</b> | CASC1                    |

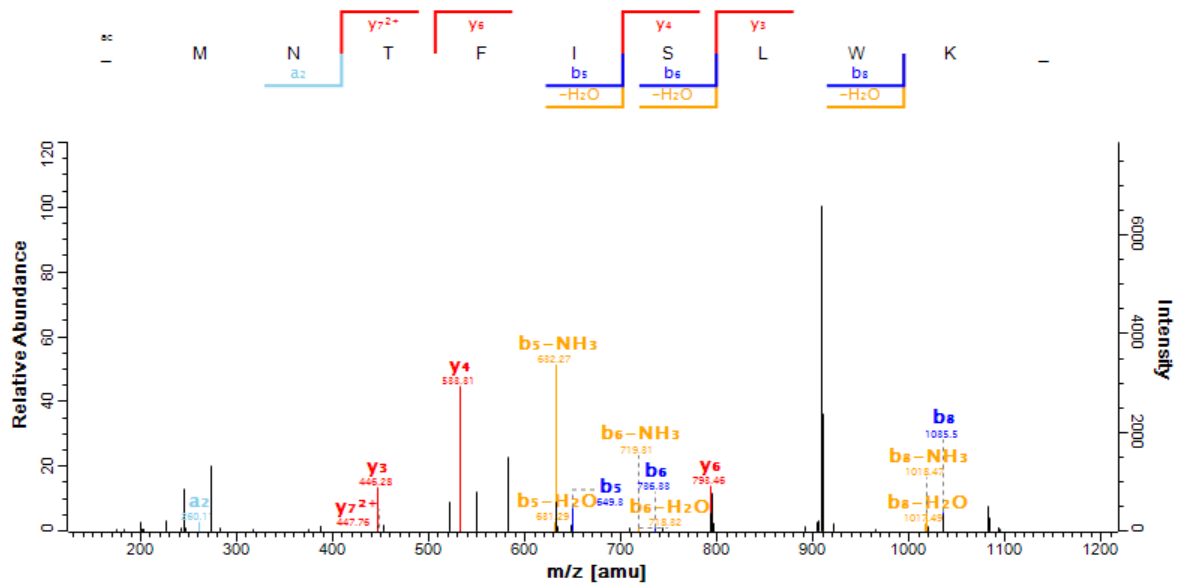

**Protein Group ID:** 773  
**Protein Accession Numbers:** Q9HA77; F5H579  
**Gene Names:** CARS2  
**Peptide Sequence:** VTENIPQIISFIEGIGIYR  
**Total Number of Spectra:** 7  
**Number of Replicates (out of 10):** 6  
**Best Match Score:** 91.657  
**Best Match Posterior Error Probability:** 0.00041484  
**Best Match Spectrum:**

**Scan number** 9363      **Raw file** Prt-OGE-Batch2-Mock-Frac18  
**Method** ITMS; CID      **Genenames** CARS2

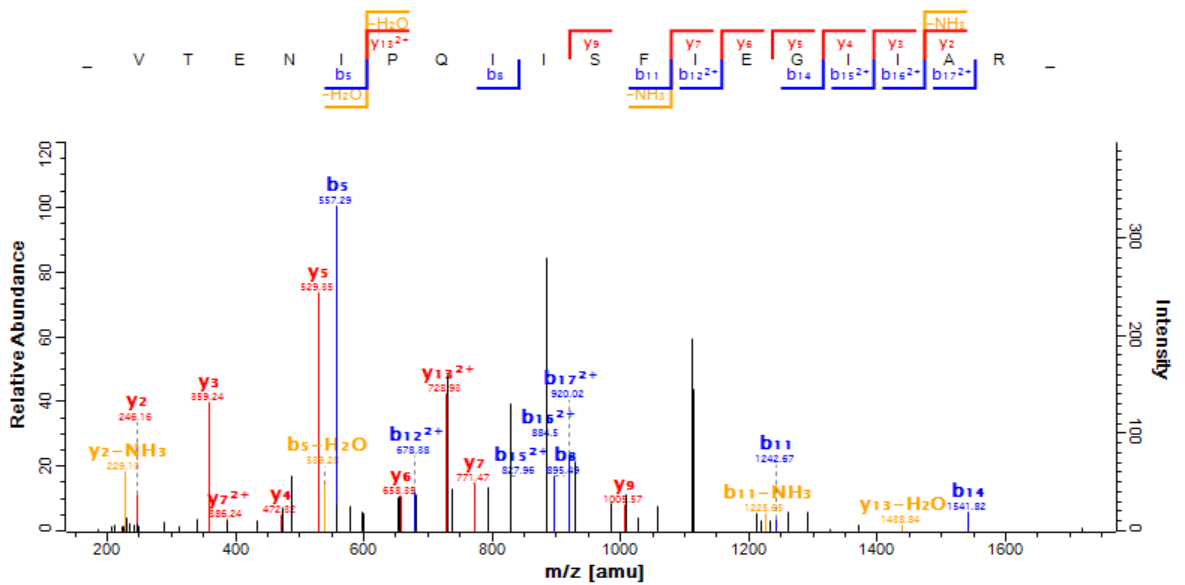

**Protein Group ID:** 779  
**Protein Accession Numbers:** F5H5R8; P18440  
**Gene Names:** NAT1  
**Peptide Sequence:** NKLDLETLDILQHQR  
**Total Number of Spectra:** 1  
**Number of Replicates (out of 10):** 1  
**Best Match Score:** 89.507  
**Best Match Posterior Error Probability:** 0.0016492  
**Best Match Spectrum:**

**Scan number** 6861      **Raw file** Prt-OGE-Batch2-Mock-Frac13  
**Method** ITMS; CID      **Genenames** NAT1

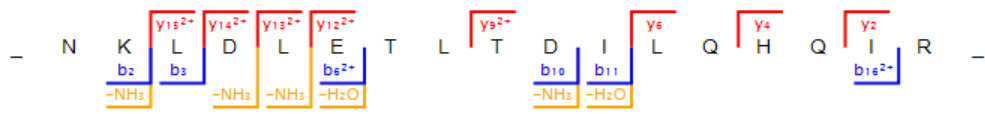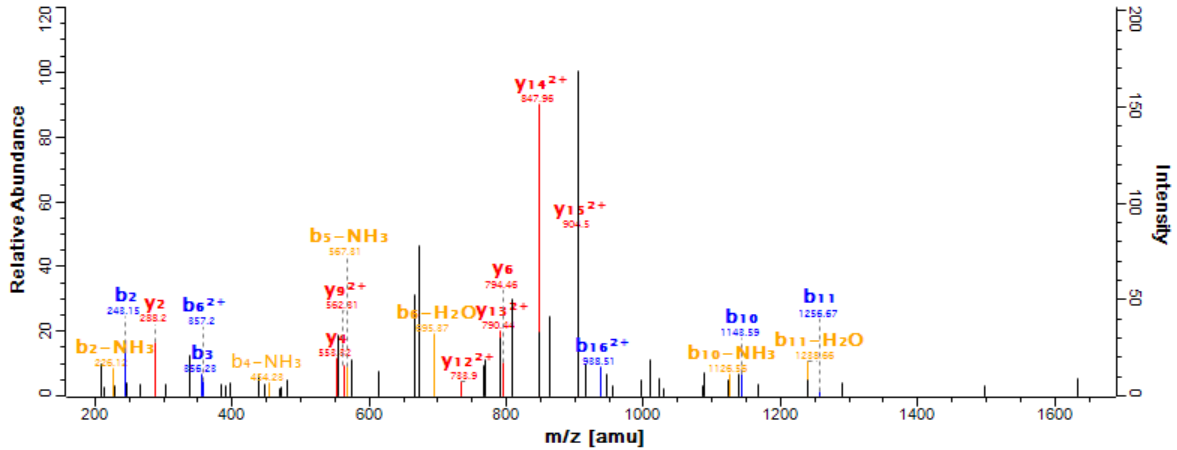



**Protein Group ID:** 780  
**Protein Accession Numbers:** F5H607  
**Gene Names:** TUFT1  
**Peptide Sequence:** MSSPGMTSLQLEK  
**Total Number of Spectra:** 5  
**Number of Replicates (out of 10):** 3  
**Best Match Score:** 83.137  
**Best Match Posterior Error Probability:** 0.0016437  
**Best Match Spectrum:**

**Scan number** 6498      **Raw file** 20100914-KD-Batch4-Prt-OGE-Mock-Frac4  
**Method** ITMS; CID      **Genenames** TUFT1

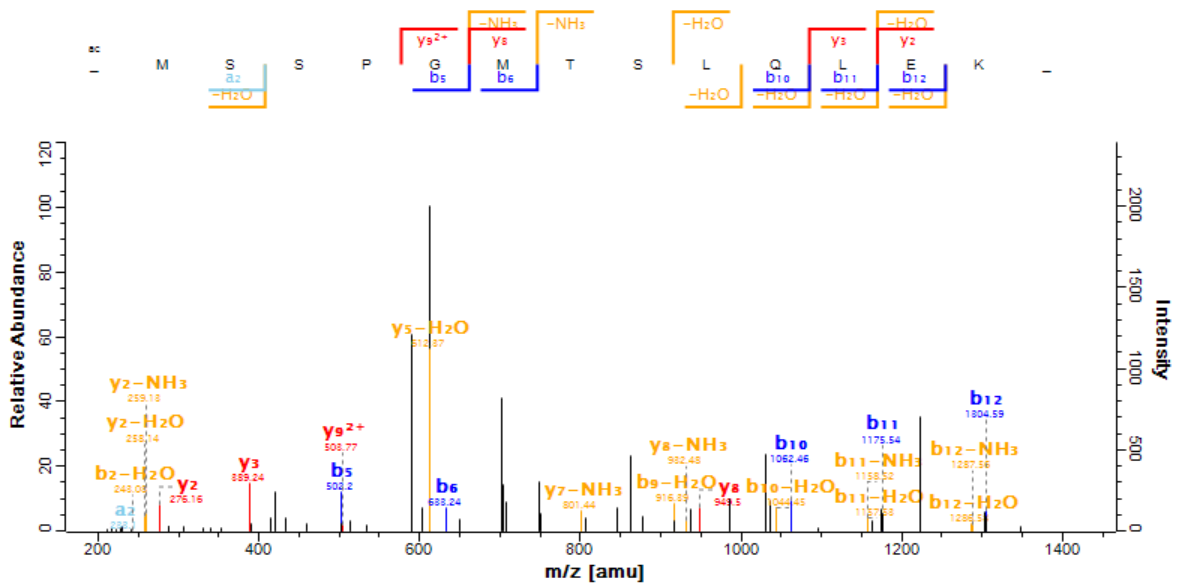

**Protein Group ID:** 782  
**Protein Accession Numbers:** Q7Z434; F5H6C8  
**Gene Names:** MAVS  
**Peptide Sequence:** GPVSPSVSFQPLAR  
**Total Number of Spectra:** 1  
**Number of Replicates (out of 10):** 1  
**Best Match Score:** 107.99  
**Best Match Posterior Error Probability:** 0.00017449  
**Best Match Spectrum:**

**Scan number** 4247      **Raw file** Prt-OGE-Batch3-Mock-Frac9  
**Method** ITMS; CID      **Genenames** MAVS

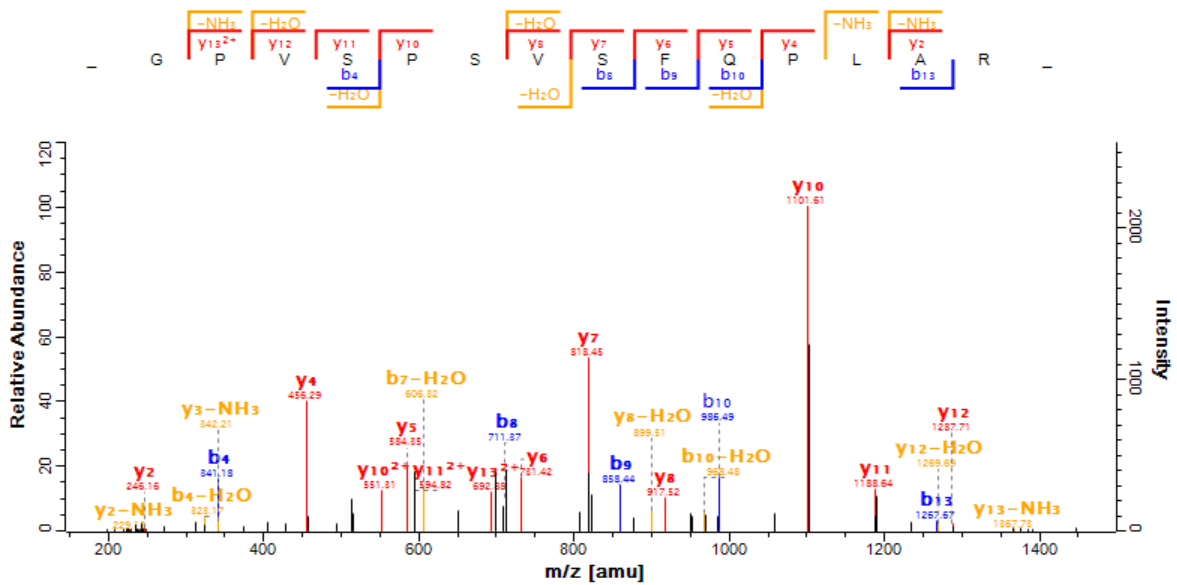

**Protein Group ID:** 786

**Protein Accession Numbers:** F5H7K4; J3KN69; Q6PIU2-2; Q6PIU2; Q6PIU2-3

**Gene Names:** NCEH1

**Peptide Sequence:** SAPLIADQAVLQLLPK

**Total Number of Spectra:** 4

**Number of Replicates (out of 10):** 3

**Best Match Score:** 116.58

**Best Match Posterior Error Probability:** 0.00012272

**Best Match Spectrum:**

**Scan number** 6567      **Raw file** 20100927-KD-Batch4-Prt-OGE-WT-Frac15  
**Method** ITMS; CID      **Genenames** NCEH1

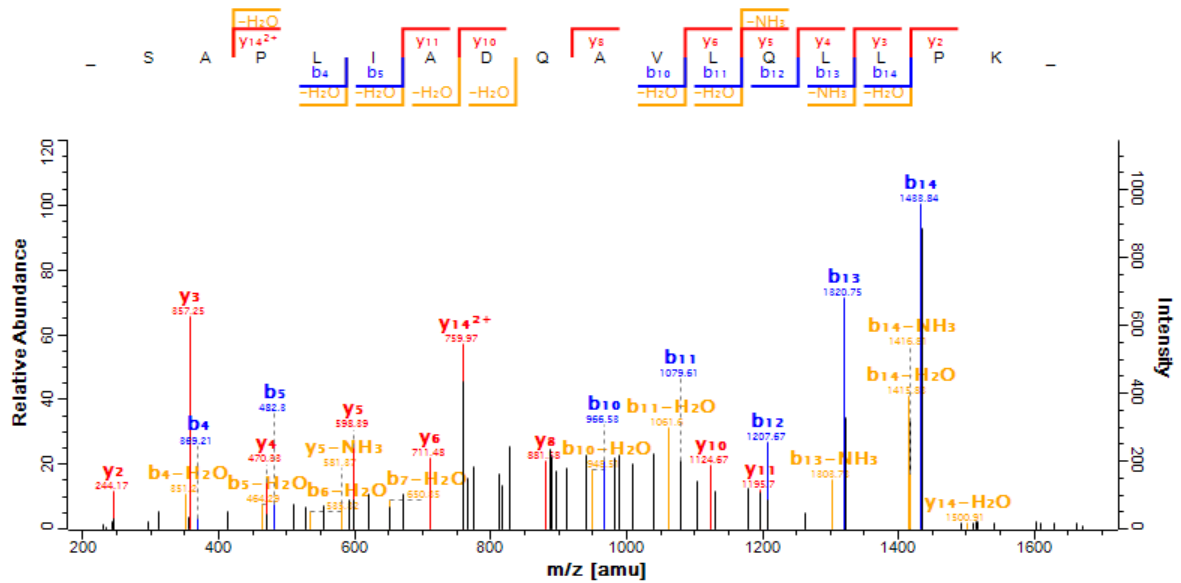

**Protein Group ID:** 787  
**Protein Accession Numbers:** Q7Z2W9; F5H7V8  
**Gene Names:** MRPL21  
**Peptide Sequence:** TSLSSPPWPEVVLDPVEETR  
**Total Number of Spectra:** 1  
**Number of Replicates (out of 10):** 1  
**Best Match Score:** 73.783  
**Best Match Posterior Error Probability:** 0.00081878  
**Best Match Spectrum:**

**Scan number** 6123      **Raw file** 20100914-KD-Batch4-Prt-OGE-Mock-Frac17  
**Method** ITMS; CID      **Genenames** MRPL21

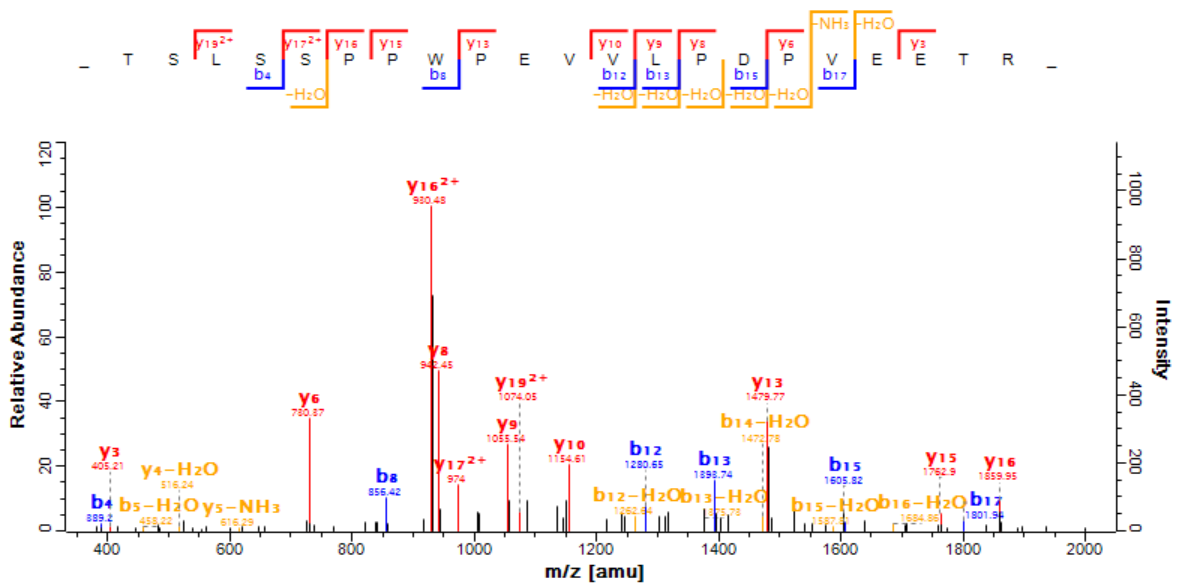

**Protein Group ID:** 789

**Protein Accession Numbers:** F5H8A7; H0YN33; Q9BW66

**Gene Names:** CINP

**Peptide Sequence:** ELAHTGDPDLTSLYSMLWHLHQPVEESD<sup>-H<sub>2</sub>O</sup>SR

**Total Number of Spectra:** 1

**Number of Replicates (out of 10):** 1

**Best Match Score:** 83.602

**Best Match Posterior Error Probability:** 2.44E-07

**Best Match Spectrum:**

**Scan number** 6669      **Raw file** 20100917-KD-Batch5-Prt-OGE-Mock-Frac13  
**Method** ITMS; CID      **Genenames** CINP

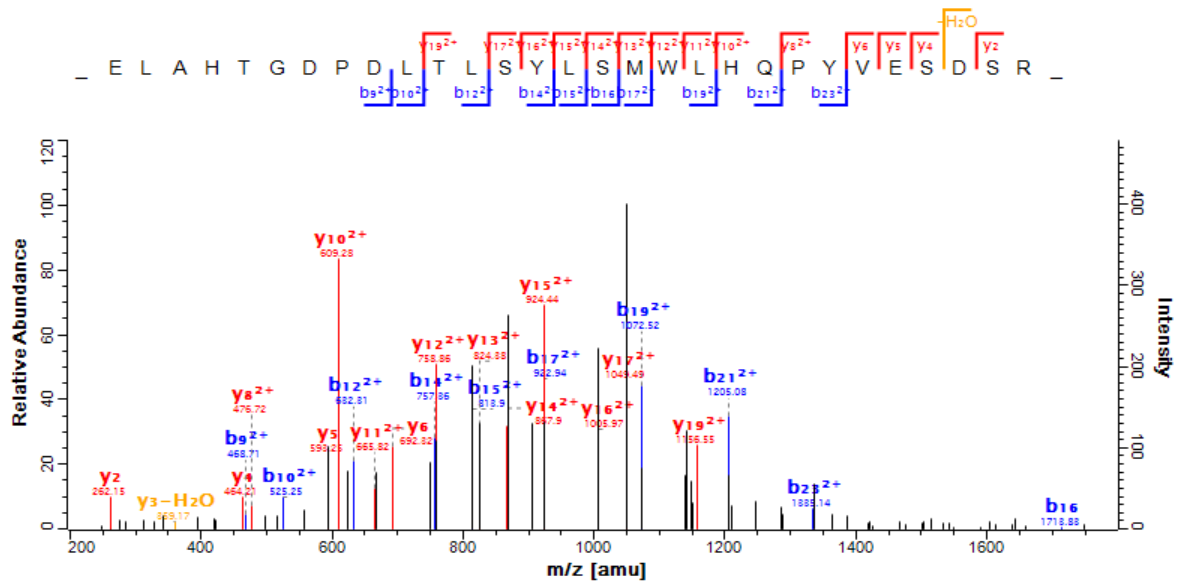

**Protein Group ID:** 790  
**Protein Accession Numbers:** P18887; F5H8D7  
**Gene Names:** XRCC1  
**Peptide Sequence:** ILQGVVVVLSGFQNPFR  
**Total Number of Spectra:** 1  
**Number of Replicates (out of 10):** 1  
**Best Match Score:** 99.747  
**Best Match Posterior Error Probability:** 0.00026038  
**Best Match Spectrum:**

**Scan number** 7112      **Raw file** 20100914-KD-Batch4-Prt-OGE-Mock-Frac17  
**Method** ITMS; CID      **Genenames** XRCC1

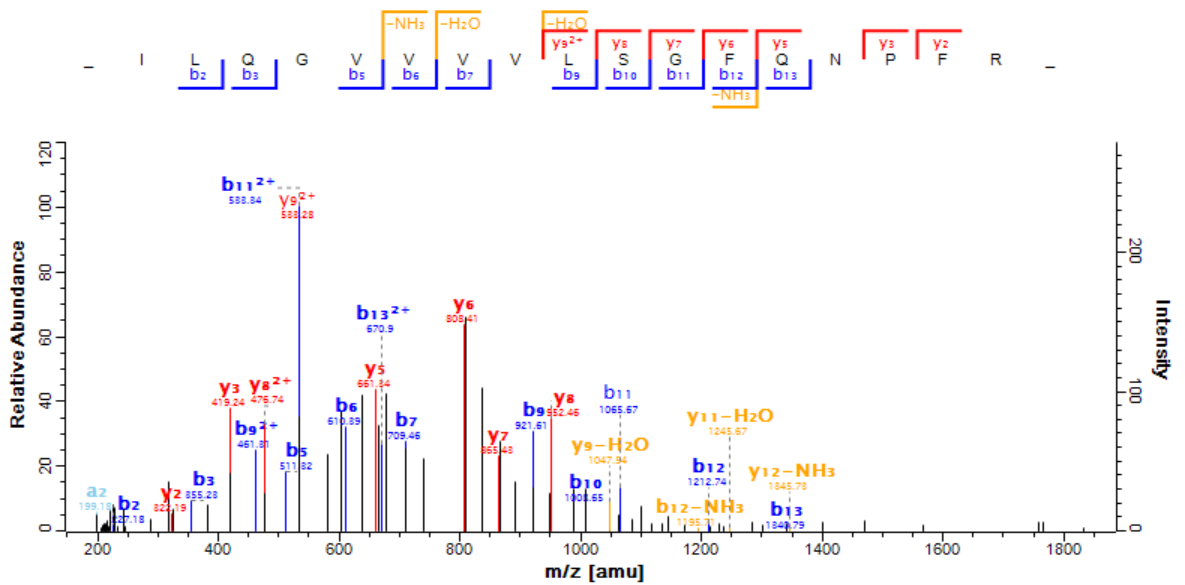

**Protein Group ID:** 791

**Protein Accession Numbers:** Q9UBL3; Q9UBL3-3; F5H8F7; H0YBF6; H0YAQ0

**Gene Names:** ASH2L

**Peptide Sequence:** DIFEGVYFPAISLYK

**Total Number of Spectra:** 2

**Number of Replicates (out of 10):** 2

**Best Match Score:** 96.247

**Best Match Posterior Error Probability:** 0.00017502

**Best Match Spectrum:**

|                    |           |                  |                                       |
|--------------------|-----------|------------------|---------------------------------------|
| <b>Scan number</b> | 6809      | <b>Raw file</b>  | 20100917-KD-Batch5-Prt-OGE-Mock-Frac9 |
| <b>Method</b>      | ITMS; CID | <b>Genenames</b> | ASH2L                                 |

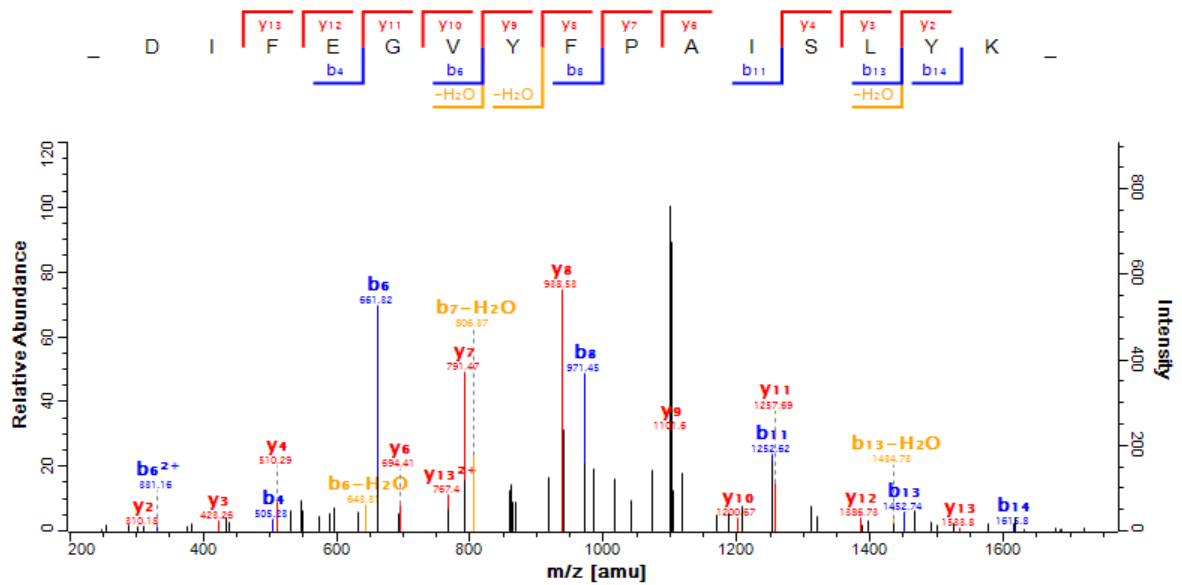

**Protein Group ID:** 794

**Protein Accession Numbers:** Q9H0Z9; Q9BX46; F6VZ39; Q9H0Z9-2; H0YA61

**Gene Names:** RBM38;RBM24

**Peptide Sequence:** GYGFVTMADR

**Total Number of Spectra:** 2

**Number of Replicates (out of 10):** 2

**Best Match Score:** 103.22

**Best Match Posterior Error Probability:** 0.00048312

**Best Match Spectrum:**

|                    |           |                  |                            |
|--------------------|-----------|------------------|----------------------------|
| <b>Scan number</b> | 3689      | <b>Raw file</b>  | Prt-OGE-Batch2-Mock-Frac18 |
| <b>Method</b>      | ITMS; CID | <b>Genenames</b> | RBM38;RBM24                |

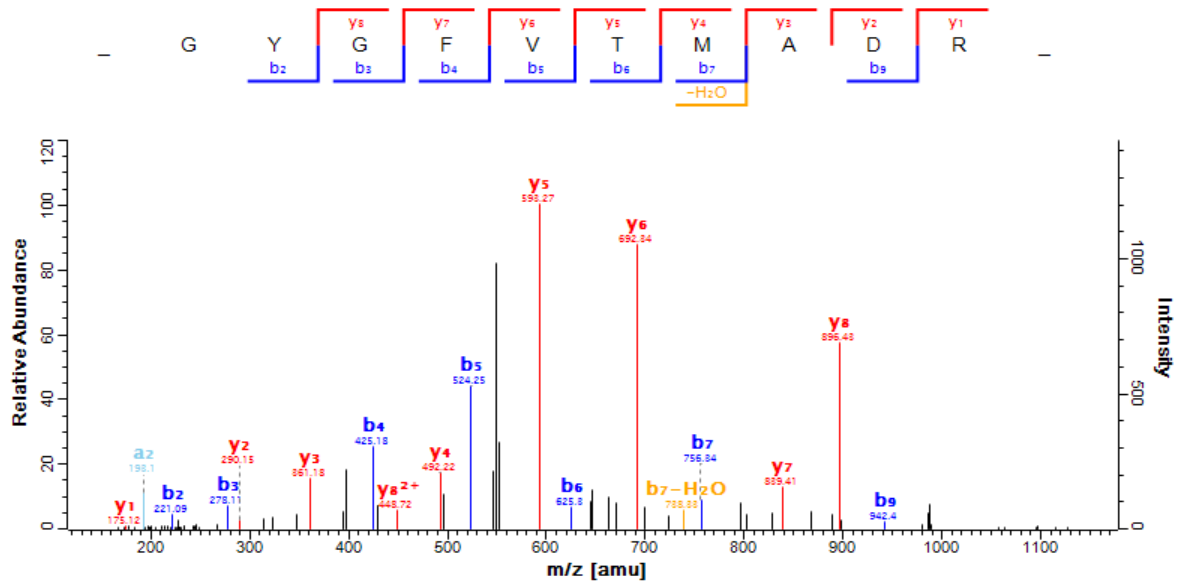



**Protein Group ID:** 798

**Protein Accession Numbers:** Q5HYK3; F8V VX6; F8V VV7; F8V P53

**Gene Names:** COQ5

**Peptide Sequence:** FLNYVQSQHQR

**Total Number of Spectra:** 1

**Number of Replicates (out of 10):** 1

**Best Match Score:** 94.692

**Best Match Posterior Error Probability:** 0.00052508

**Best Match Spectrum:**

**Scan number** 1662      **Raw file** 20100930-KD-Batch5-Prt-OGE-WT-Frac12  
**Method** ITMS; CID      **Genenames** COQ5

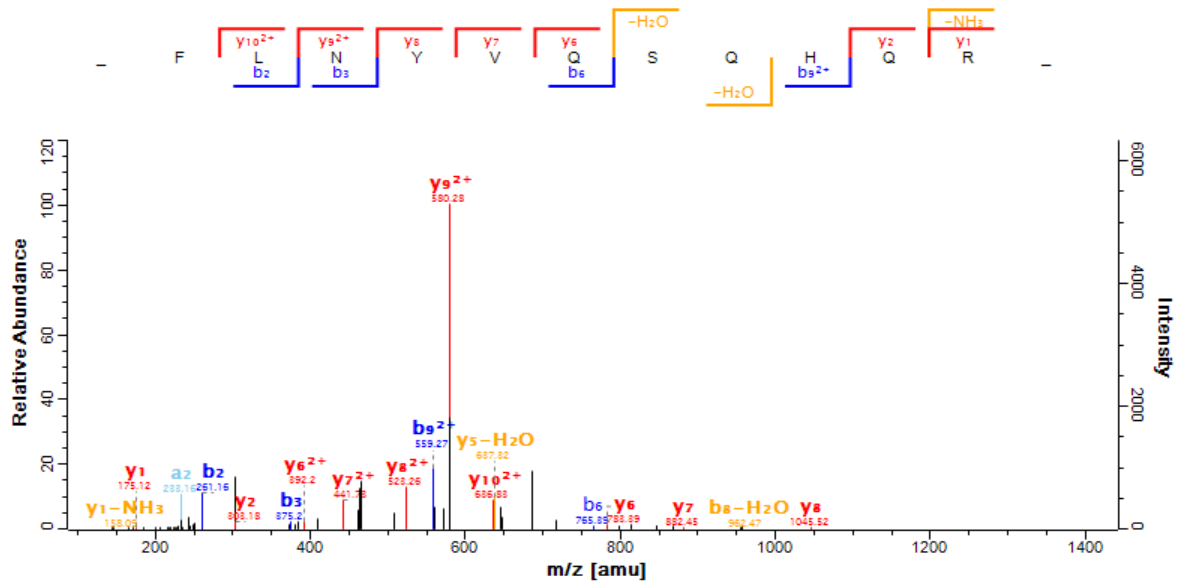

**Protein Group ID:** 799

**Protein Accession Numbers:** P78537; F8VP73; P78537-2; F8W036

**Gene Names:** BLOC1S1

**Peptide Sequence:** EAITAATCLTEALVDHLNVGVAQAYMNR

**Total Number of Spectra:** 1

**Number of Replicates (out of 10):** 1

**Best Match Score:** 61.04

**Best Match Posterior Error Probability:** 0.00014064

**Best Match Spectrum:**

|                    |           |                  |                                        |
|--------------------|-----------|------------------|----------------------------------------|
| <b>Scan number</b> | 7186      | <b>Raw file</b>  | 20100914-KD-Batch4-Prt-OGE-Mock-Frac17 |
| <b>Method</b>      | ITMS; CID | <b>Genenames</b> | BLOC1S1                                |

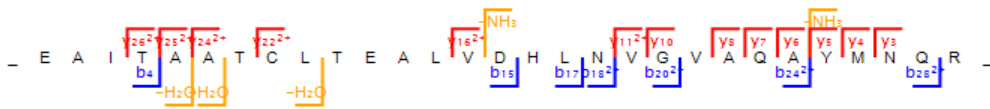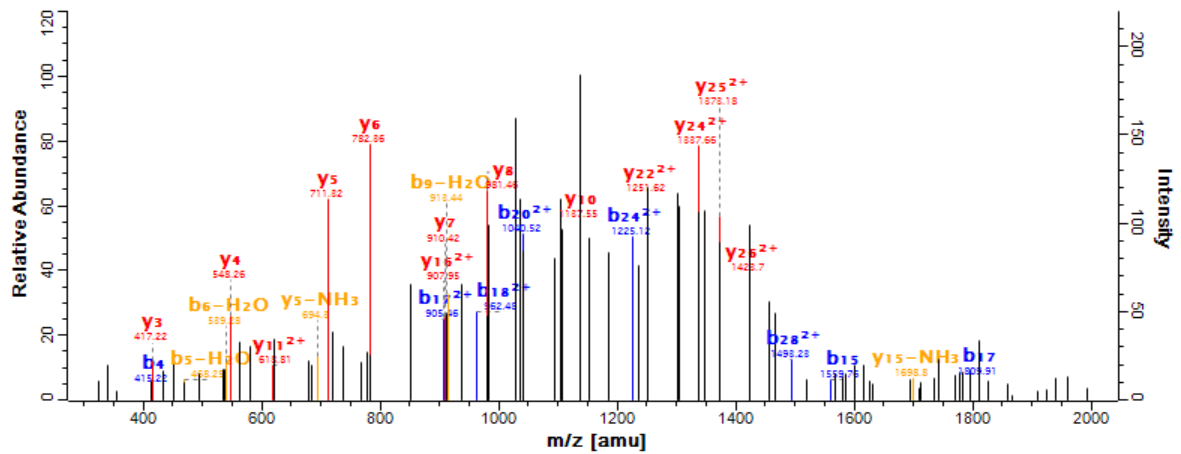

**Protein Group ID:** 802

**Protein Accession Numbers:** Q9BSB4; F8VQD9; F8VVA0; H3BMZ4

**Gene Names:** ATG101;C12orf44

**Peptide Sequence:** QVEEAMLAVLHTVLLHR

**Total Number of Spectra:** 4

**Number of Replicates (out of 10):** 4

**Best Match Score:** 93.237

**Best Match Posterior Error Probability:** 0.00039566

**Best Match Spectrum:**

|                    |           |                  |                 |
|--------------------|-----------|------------------|-----------------|
| <b>Scan number</b> | 6605      | <b>Raw file</b>  | OGE-Mock-Frac10 |
| <b>Method</b>      | ITMS; CID | <b>Genenames</b> | ATG101;C12orf44 |

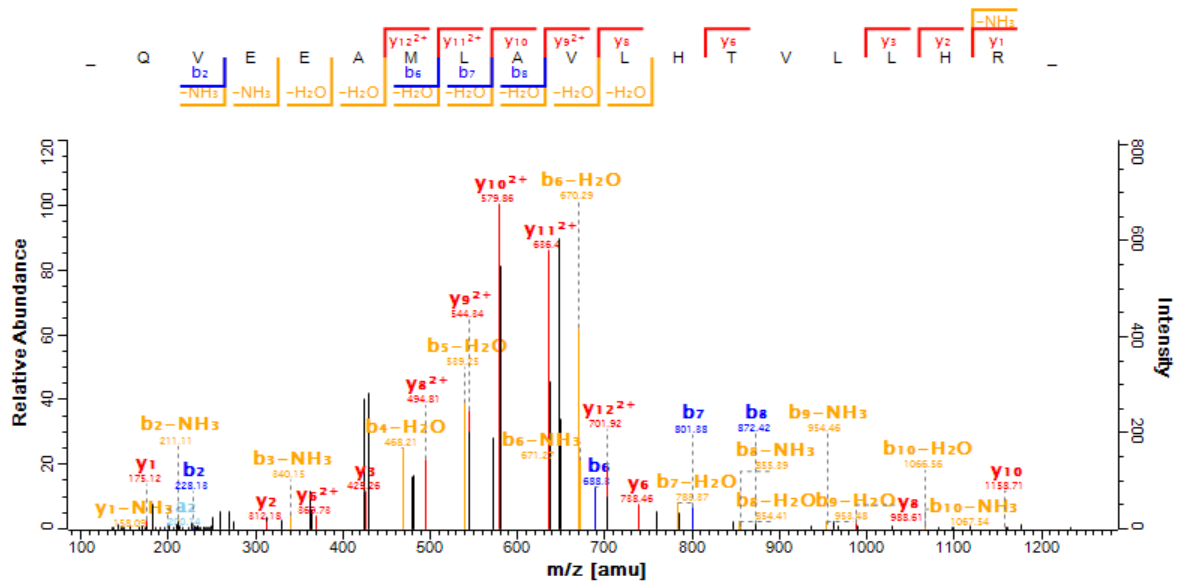

**Protein Group ID:** 805  
**Protein Accession Numbers:** F8VRQ4  
**Gene Names:** SMARCD1  
**Peptide Sequence:** MCNGLLNLPHPWANEMALSK  
**Total Number of Spectra:** 1  
**Number of Replicates (out of 10):** 1  
**Best Match Score:** 49.708  
**Best Match Posterior Error Probability:** 0.00083528  
**Best Match Spectrum:**

**Scan number** 4893      **Raw file** Prt-OGE-Batch3--Mock-Frac1 8  
**Method** ITMS; CID      **Genenames** SMARCD1

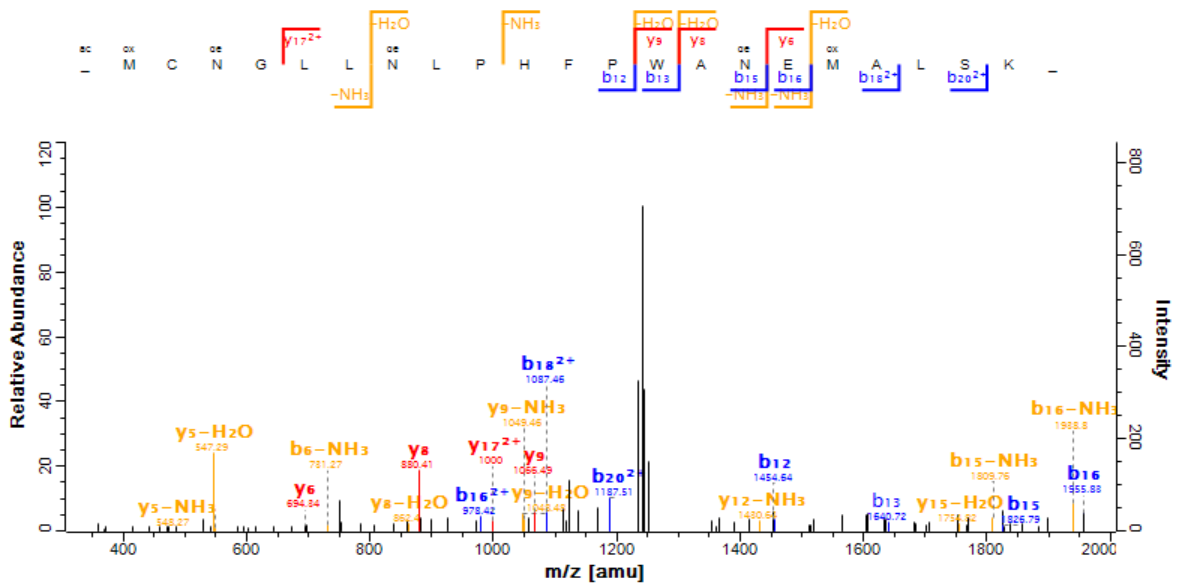

**Protein Group ID:** 808  
**Protein Accession Numbers:** P61626; F8VV32  
**Gene Names:** LYZ  
**Peptide Sequence:** STDYGIFQINSR  
**Total Number of Spectra:** 1  
**Number of Replicates (out of 10):** 1  
**Best Match Score:** 106.32  
**Best Match Posterior Error Probability:** 0.00023858  
**Best Match Spectrum:**

**Scan number** 2831      **Raw file** Prt-OGE-Batch2-WT-Frac20  
**Method** ITMS; CID      **Genenames** LYZ

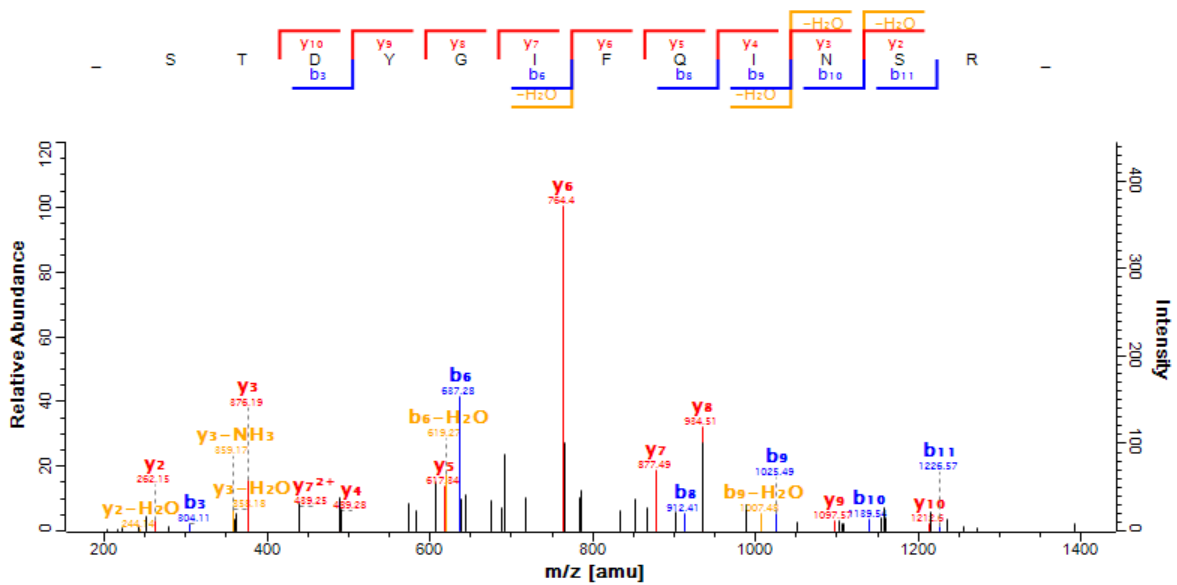

**Protein Group ID:** 812

**Protein Accession Numbers:** P51687; F8VWV9

**Gene Names:** SUOX

**Peptide Sequence:** LMLAAGGLPEPFWALYAVHNQSHVR

**Total Number of Spectra:** 1

**Number of Replicates (out of 10):** 1

**Best Match Score:** 75.358

**Best Match Posterior Error Probability:** 3.36E-05

**Best Match Spectrum:**

|                    |           |                  |                           |
|--------------------|-----------|------------------|---------------------------|
| <b>Scan number</b> | 7040      | <b>Raw file</b>  | Prt-OGE-Batch3-Mock-Frac8 |
| <b>Method</b>      | ITMS; CID | <b>Genenames</b> | SUOX                      |

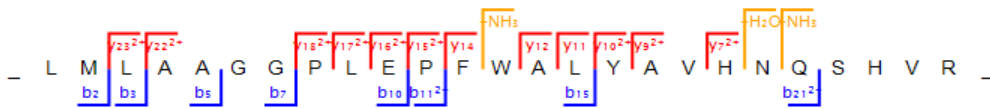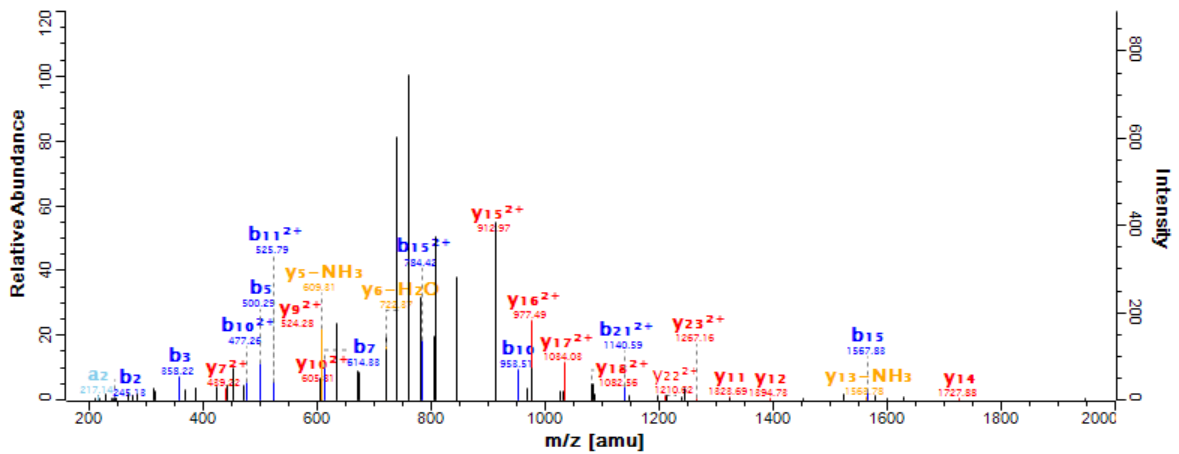

**Protein Group ID:** 816

**Protein Accession Numbers:** Q12800; Q12800-4; Q12800-3; Q12800-2; F8VX55; F8VWL0

**Gene Names:** TFCP2

**Peptide Sequence:** ILDIDIPMSIVGIIIDPR

**Total Number of Spectra:** 4

**Number of Replicates (out of 10):** 4

**Best Match Score:** 89.358

**Best Match Posterior Error Probability:** 0.00043624

**Best Match Spectrum:**

|                    |           |                  |                           |
|--------------------|-----------|------------------|---------------------------|
| <b>Scan number</b> | 7183      | <b>Raw file</b>  | Prt-OGE-Batch3-Mock-Frac8 |
| <b>Method</b>      | ITMS: CID | <b>Genenames</b> | TFCP2                     |

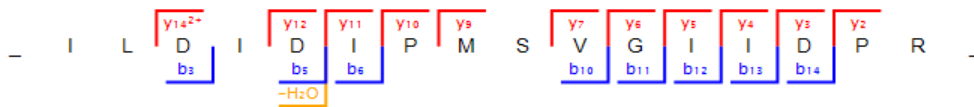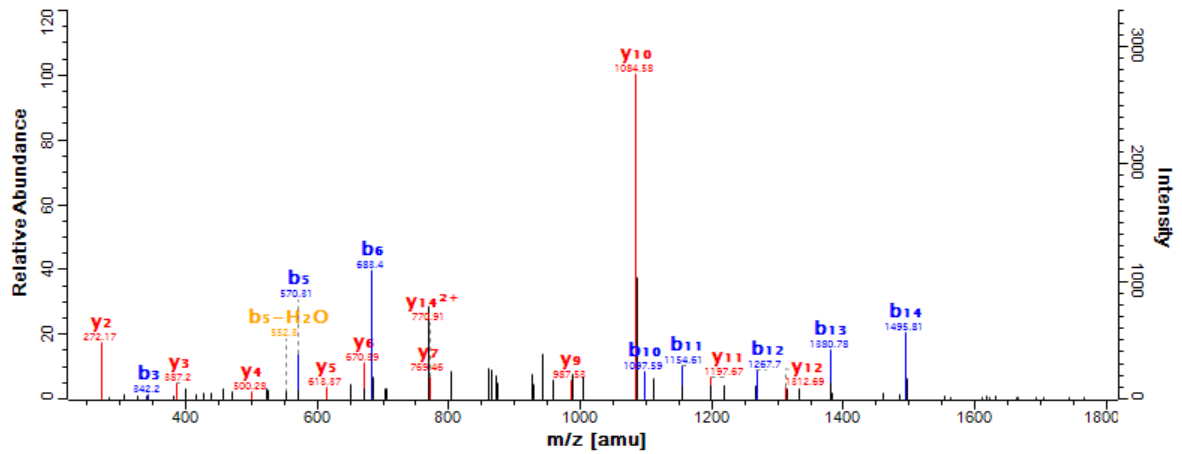

**Protein Group ID:** 817

**Protein Accession Numbers:** Q14161; Q14161-3; Q14161-5; Q14161-4; F8VXI9; Q14161-8; F8WAK2; Q14161-10; Q14161-6; Q14161-7; Q14161-11; Q14161-2; F8W822

**Gene Names:** GIT2

**Peptide Sequence:** FNAHEFATLVIDILSDAK

**Total Number of Spectra:** 9

**Number of Replicates (out of 10):** 5

**Best Match Score:** 97.291

**Best Match Posterior Error Probability:** 0.00027768

**Best Match Spectrum:**

|                    |           |                  |               |
|--------------------|-----------|------------------|---------------|
| <b>Scan number</b> | 7335      | <b>Raw file</b>  | OGE-WT-Frac18 |
| <b>Method</b>      | ITMS: CID | <b>Genenames</b> | GIT2          |

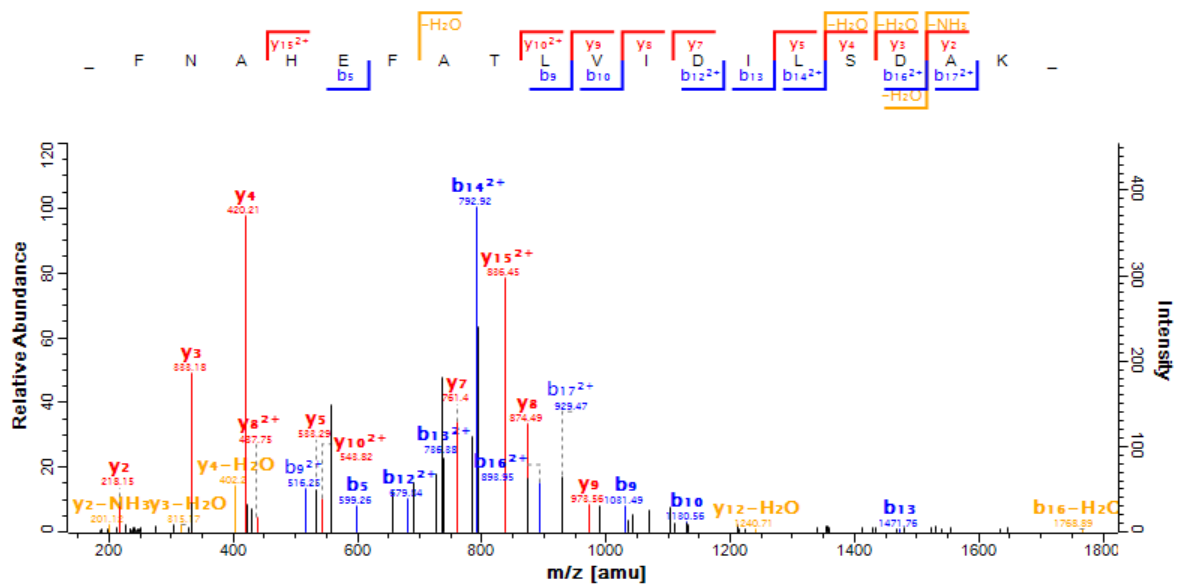



**Protein Group ID:** 823  
**Protein Accession Numbers:** F8W1H5; P51148  
**Gene Names:** RAB5C  
**Peptide Sequence:** TAMNVNEIFMAIAK  
**Total Number of Spectra:** 30  
**Number of Replicates (out of 10):** 9  
**Best Match Score:** 194.48  
**Best Match Posterior Error Probability:** 1.17E-21  
**Best Match Spectrum:**

**Scan number** 5470      **Raw file** Prt-OGE-Batch2-WT-Frac12  
**Method** ITMS; CID      **Genenames** RAB5C

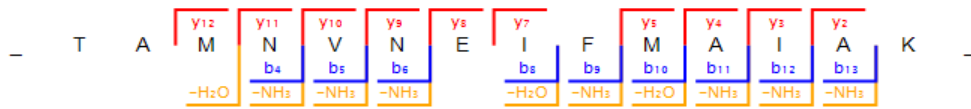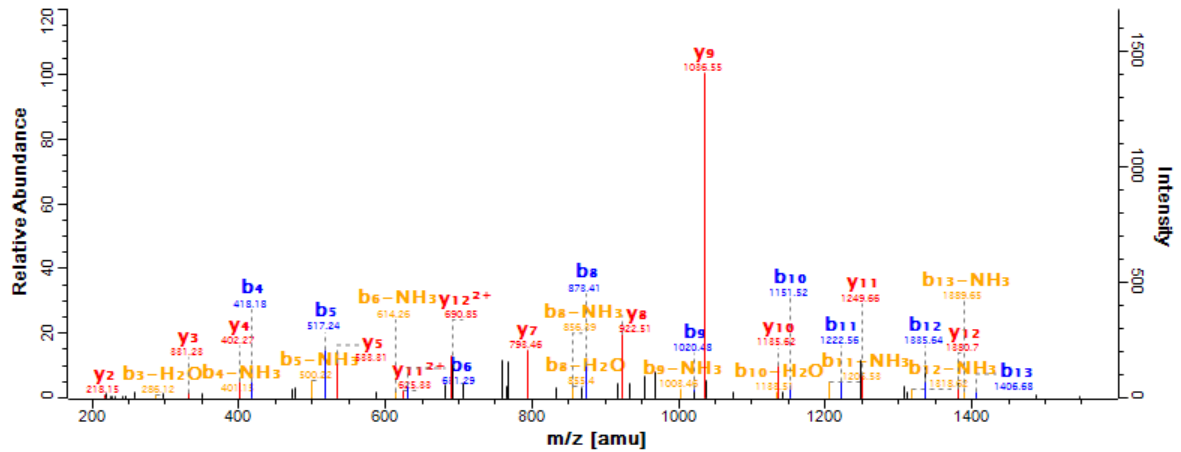

**Protein Group ID:** 825

**Protein Accession Numbers:** Q8WYA0; Q8WYA0-3; F8W1J4

**Gene Names:** IFT81

**Peptide Sequence:** NYNLITFDSLEPMQLQLVLSLVLAIEDPK

**Total Number of Spectra:** 1

**Number of Replicates (out of 10):** 1

**Best Match Score:** 71.794

**Best Match Posterior Error Probability:** 8.52E-06

**Best Match Spectrum:**

**Scan number** 8889      **Raw file** 20100917-KD-Batch5-Prt-OGE-Mock-Frac21  
**Method** ITMS; CID      **Genenames** IFT81

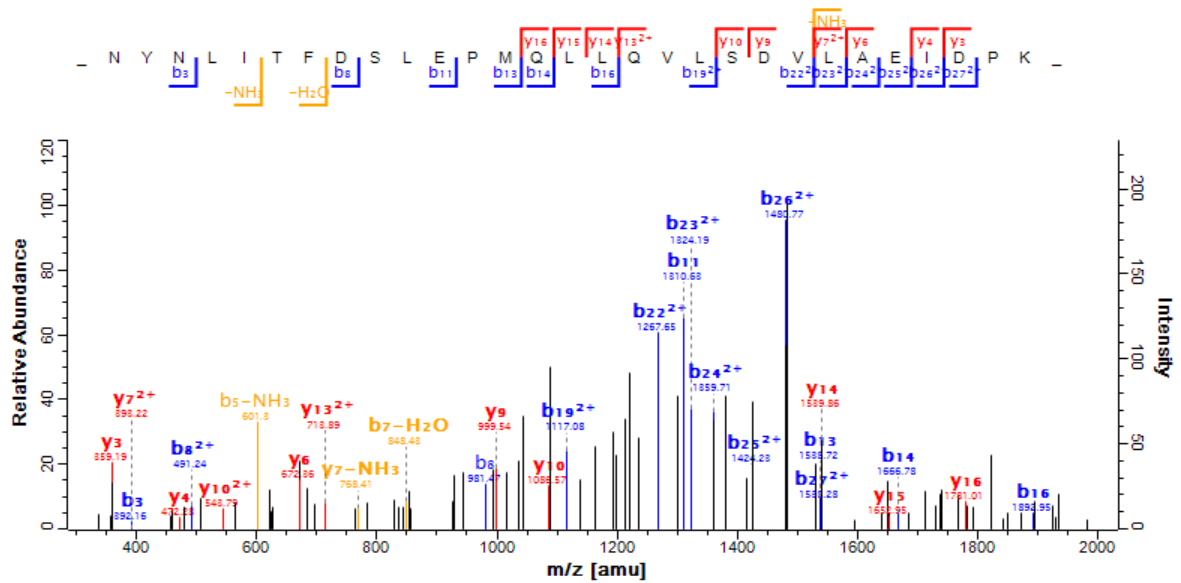

**Protein Group ID:** 830

**Protein Accession Numbers:** Q9NXR7-1; Q9NXR7; Q9NXR7-3; Q9NXR7-4; F8W733

**Gene Names:** BRE

**Peptide Sequence:** LPVDFSNIPYTK

**Total Number of Spectra:** 3

**Number of Replicates (out of 10):** 3

**Best Match Score:** 109.84

**Best Match Posterior Error Probability:** 0.00015476

**Best Match Spectrum:**

**Scan number** 6786      **Raw file** 20100927-KD-Batch4-Prt-OGE-WT-Frac10  
**Method** ITMS; CID      **Genenames** BRE

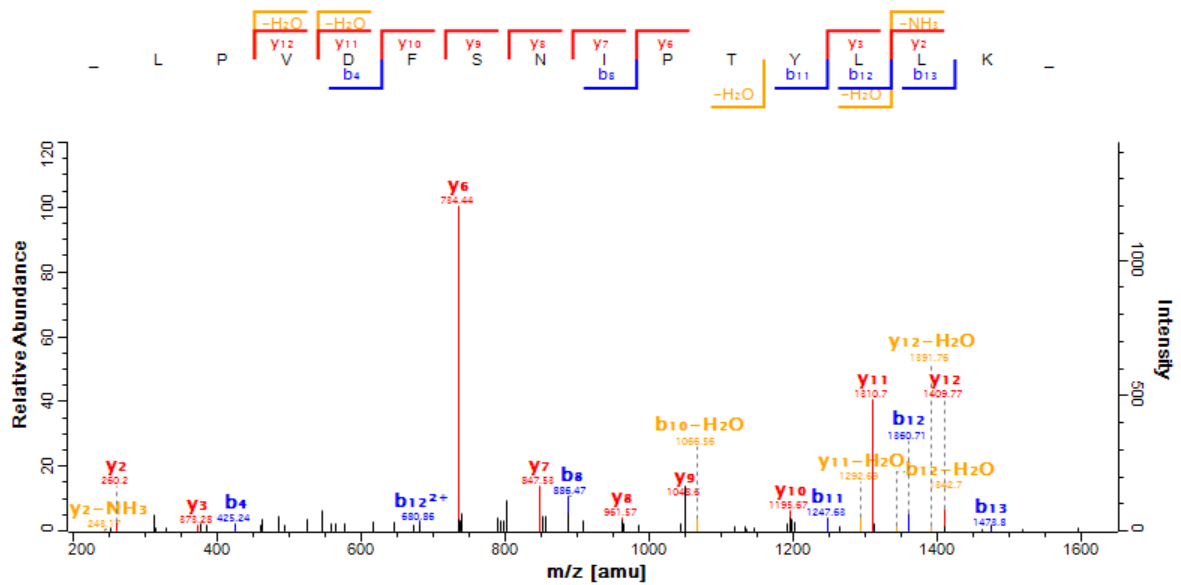

**Protein Group ID:** 837  
**Protein Accession Numbers:** O00471; F8W9B8  
**Gene Names:** EXOC5  
**Peptide Sequence:** LLEEFVNHIQELQIMDER  
**Total Number of Spectra:** 1  
**Number of Replicates (out of 10):** 1  
**Best Match Score:** 141.55  
**Best Match Posterior Error Probability:** 3.05E-07  
**Best Match Spectrum:**

**Scan number** 5197      **Raw file** Prt-OGE-Batch2-WT-Frac15  
**Method** ITMS; CID      **Genenames** EXOC5

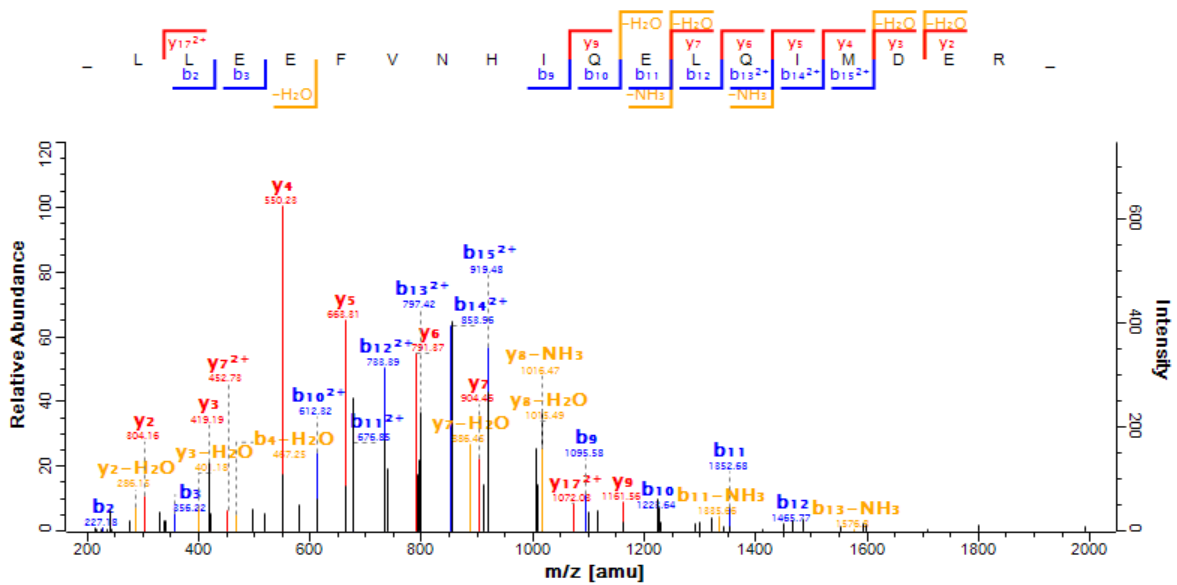

**Protein Group ID:** 838

**Protein Accession Numbers:** O94763; O94763-3; F8W9T0; O94763-2

**Gene Names:** URI1

**Peptide Sequence:** LLPLSVTPEAFSGTVIEK

**Total Number of Spectra:** 1

**Number of Replicates (out of 10):** 1

**Best Match Score:** 81.317

**Best Match Posterior Error Probability:** 0.0010712

**Best Match Spectrum:**

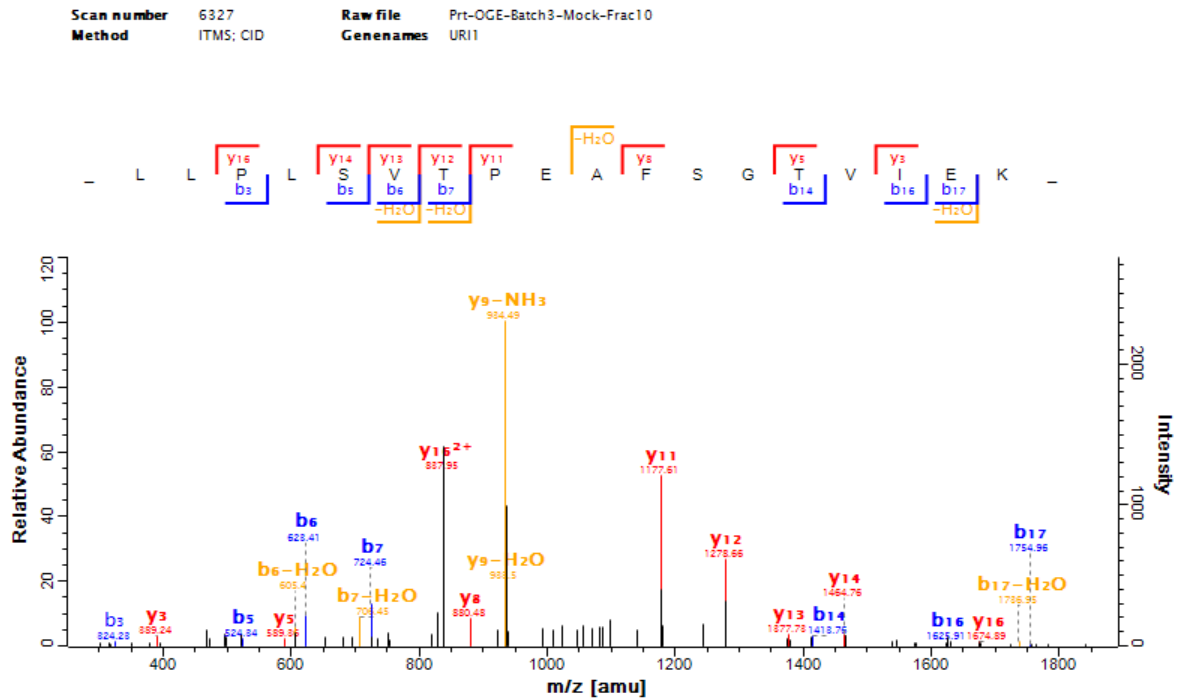

**Protein Group ID:** 839

**Protein Accession Numbers:** O95456; O95456-2; F8WBH7

**Gene Names:** PSMG1

**Peptide Sequence:** AATFFGEVVK

**Total Number of Spectra:** 2

**Number of Replicates (out of 10):** 2

**Best Match Score:** 143.96

**Best Match Posterior Error Probability:** 5.38E-05

**Best Match Spectrum:**

**Scan number** 6201      **Raw file** Prt-OGE-Batch2-Mock-Frac15  
**Method** ITMS; CID      **Genenames** PSMG1

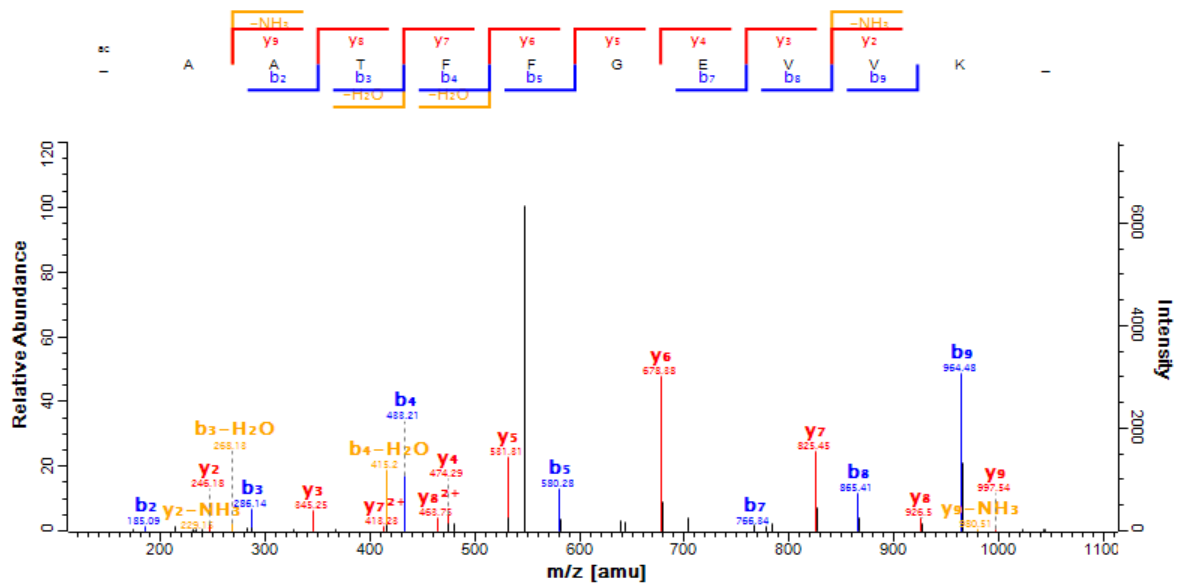

**Protein Group ID:** 844  
**Protein Accession Numbers:** P09871; F8WCZ6  
**Gene Names:** C1S  
**Peptide Sequence:** TNFDNDIALVR  
**Total Number of Spectra:** 3  
**Number of Replicates (out of 10):** 3  
**Best Match Score:** 151.26  
**Best Match Posterior Error Probability:** 1.37E-05  
**Best Match Spectrum:**

**Scan number** 3253      **Raw file** Prt-OGE-Batch3-WT-Frac5  
**Method** ITMS; CID      **Genenames** C1S

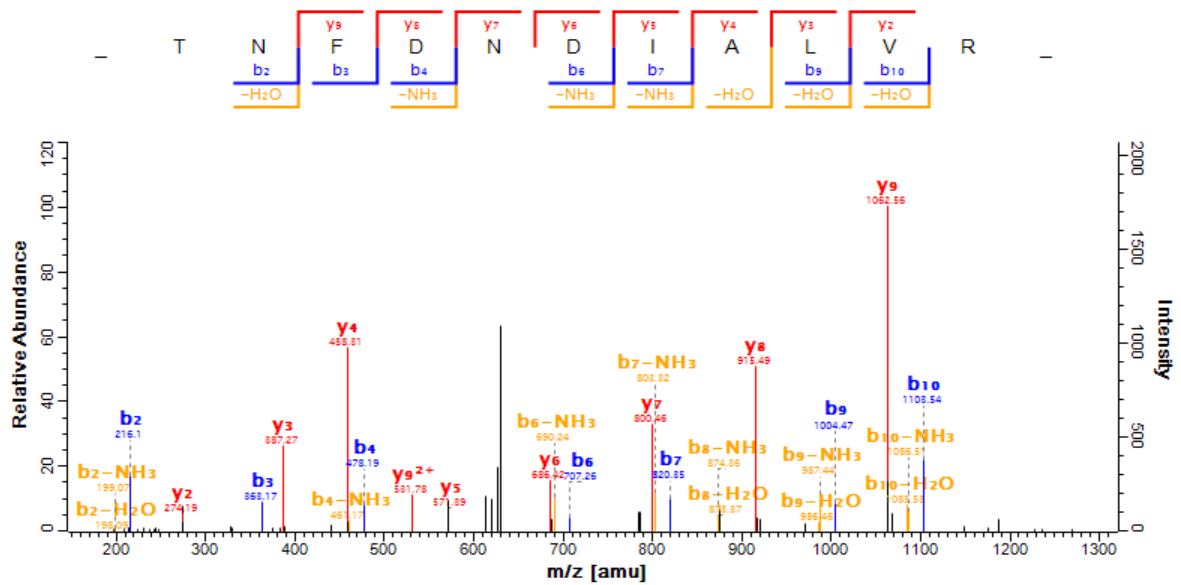

**Protein Group ID:** 846

**Protein Accession Numbers:** Q9Y2H0; Q9Y2H0-1; Q9Y2H0-3; F8WF49

**Gene Names:** DLGAP4

**Peptide Sequence:** PTAQDLAGFWDLLQLSIEDISMK

**Total Number of Spectra:** 3

**Number of Replicates (out of 10):** 2

**Best Match Score:** 127.96

**Best Match Posterior Error Probability:** 1.25E-13

**Best Match Spectrum:**

**Scan number** 9700      **Raw file** 20100930-KD-Batch5-Prt-OGE-WT-Frac10  
**Method** ITMS; CID      **Genenames** DLGAP4

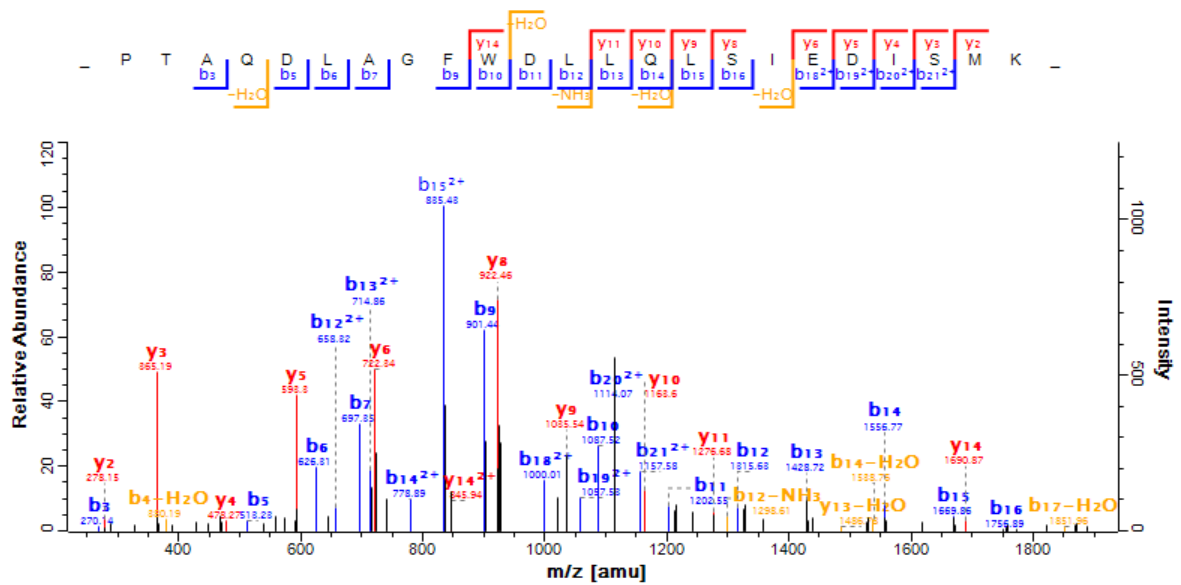



**Protein Group ID:** 848

**Protein Accession Numbers:** Q9UHY8-2; Q9UHY8; G3V0F5

**Gene Names:** FEZ2

**Peptide Sequence:** AADGDWQDFYEFQEPAR

**Total Number of Spectra:** 2

**Number of Replicates (out of 10):** 2

**Best Match Score:** 88.385

**Best Match Posterior Error Probability:** 0.00047933

**Best Match Spectrum:**

**Scan number** 4022      **Raw file** Prt-OGE-Batch3-WT-Frac2  
**Method** ITMS; CID      **Genenames** FEZ2

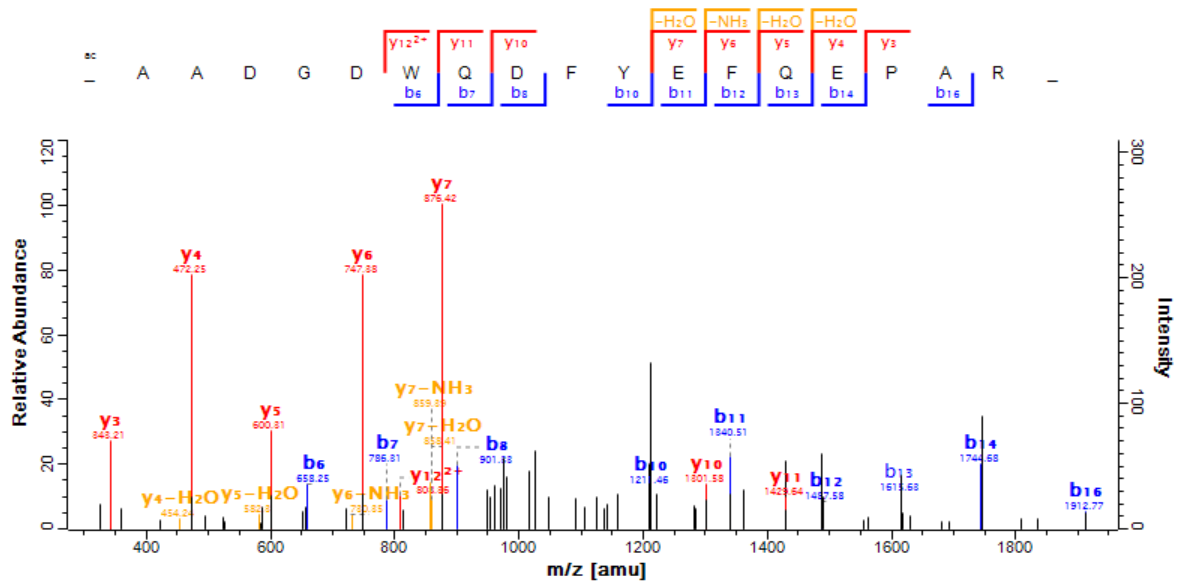

**Protein Group ID:** 852  
**Protein Accession Numbers:** G3V1B1  
**Gene Names:** SUGT1P3  
**Peptide Sequence:** FFQSFSDALIDQDPQAALEELTK  
**Total Number of Spectra:** 33  
**Number of Replicates (out of 10):** 10  
**Best Match Score:** 208.92  
**Best Match Posterior Error Probability:** 3.89E-67  
**Best Match Spectrum:**

**Scan number** 7050      **Raw file** 20100930-KD-Batch5-Prt-OGE-WT-Frac7  
**Method** ITMS; CID      **Genenames** SUGT1P3

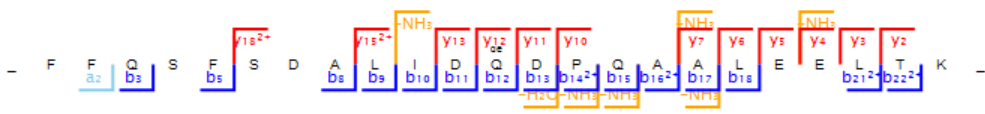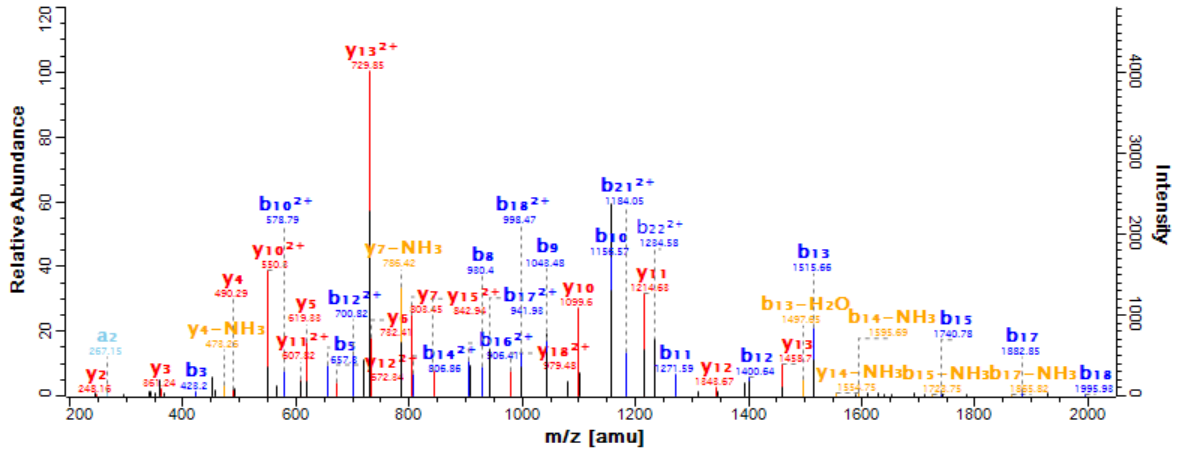

**Protein Group ID:** 857

**Protein Accession Numbers:** G3V1X3; Q8WUH1; G3V214; Q8WUH1-2; H0YIM9

**Gene Names:** CHURC1;CHURC1-FNTB

**Peptide Sequence:** AEDTISILPDDPR

**Total Number of Spectra:** 9

**Number of Replicates (out of 10):** 7

**Best Match Score:** 173.19

**Best Match Posterior Error Probability:** 1.38E-10

**Best Match Spectrum:**

|                    |           |                  |                    |
|--------------------|-----------|------------------|--------------------|
| <b>Scan number</b> | 4241      | <b>Raw file</b>  | OGE-Mock-Frac4     |
| <b>Method</b>      | ITMS; CID | <b>Genenames</b> | CHURC1;CHURC1-FNTB |

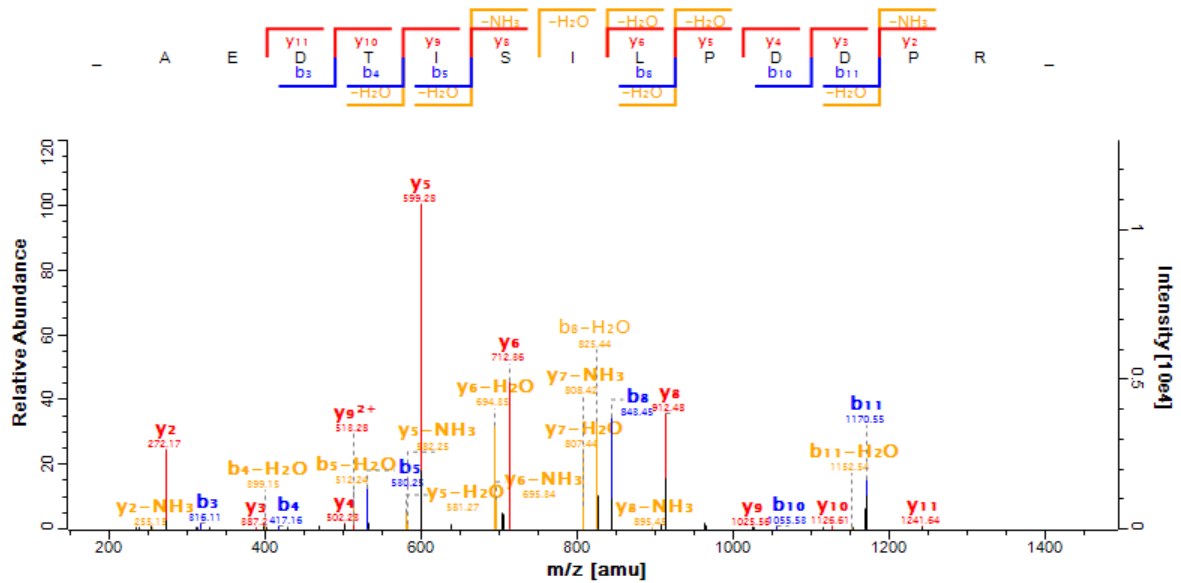

**Protein Group ID:** 859

**Protein Accession Numbers:** Q9UN36; Q9UN36-3; Q9UN36-2; G3V3N4; Q9UN36-5; Q9UN36-4; G3V4S9; G3V5H8; G3V2I9; G3V5G0; G3V392; G3V5S0; G3V383; G3V5B7; G3V2A6; G3V358; G3V271; G3V4S2; G3V285; G3V3X2; G3V3D5; G3V5V9; G3V3P1; G3V280; G3V5A6; G3V2T2; G3V4T9; G3V237; G3V3P6; G3V3X3; G3V552; G3V596; G3V5G7; G3V2Y3; G3V3C3; G3V2S0; G3V420; G3V5D7; G3V5P9; G3V239; G3V5B5; G3V4X3

**Gene Names:** NDRG2

**Peptide Sequence:** AELQEVQITEEKPLLPGQTPEAAK

**Total Number of Spectra:** 2

**Number of Replicates (out of 10):** 2

**Best Match Score:** 110.67

**Best Match Posterior Error Probability:** 5.05E-09

**Best Match Spectrum:**

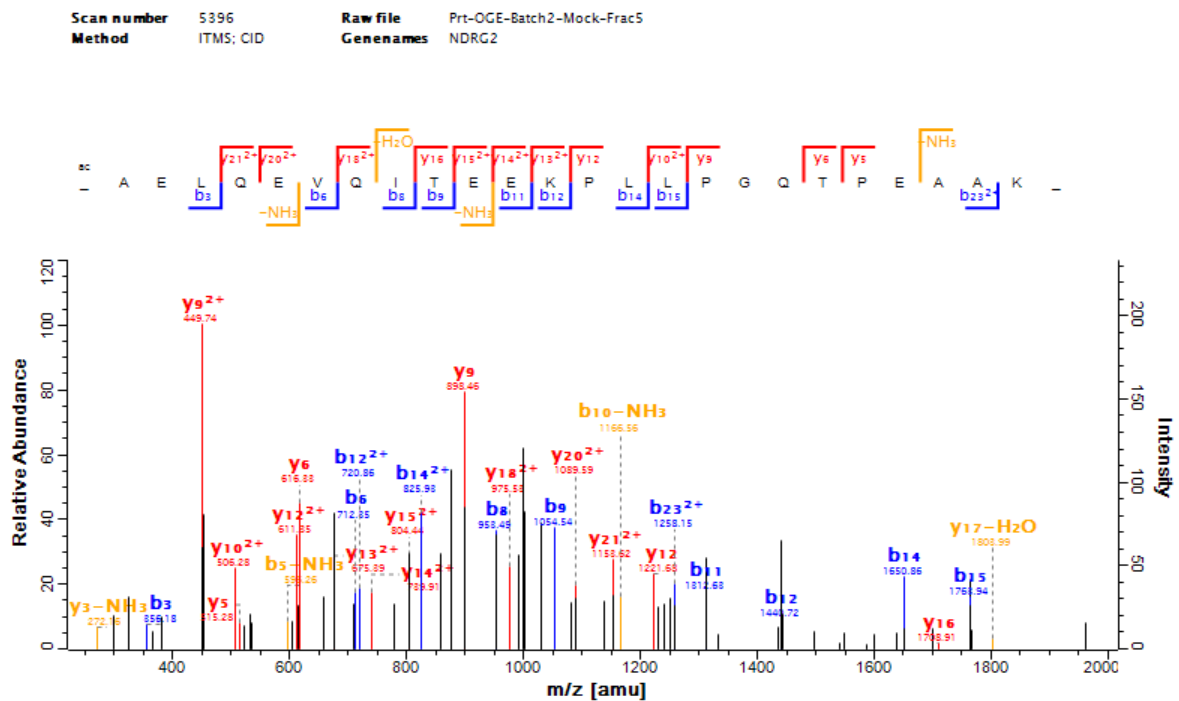

**Protein Group ID:** 863

**Protein Accession Numbers:** Q8N3R9; Q8N3R9-2; G3V2H1

**Gene Names:** MPP5

**Peptide Sequence:** ILEIEDLFSSLK

**Total Number of Spectra:** 12

**Number of Replicates (out of 10):** 9

**Best Match Score:** 144.57

**Best Match Posterior Error Probability:** 5.41E-05

**Best Match Spectrum:**

**Scan number** 5535      **Raw file** Prt-OGE-Batch3-WT-Frac12  
**Method** ITMS; CID      **Genenames** MPP5

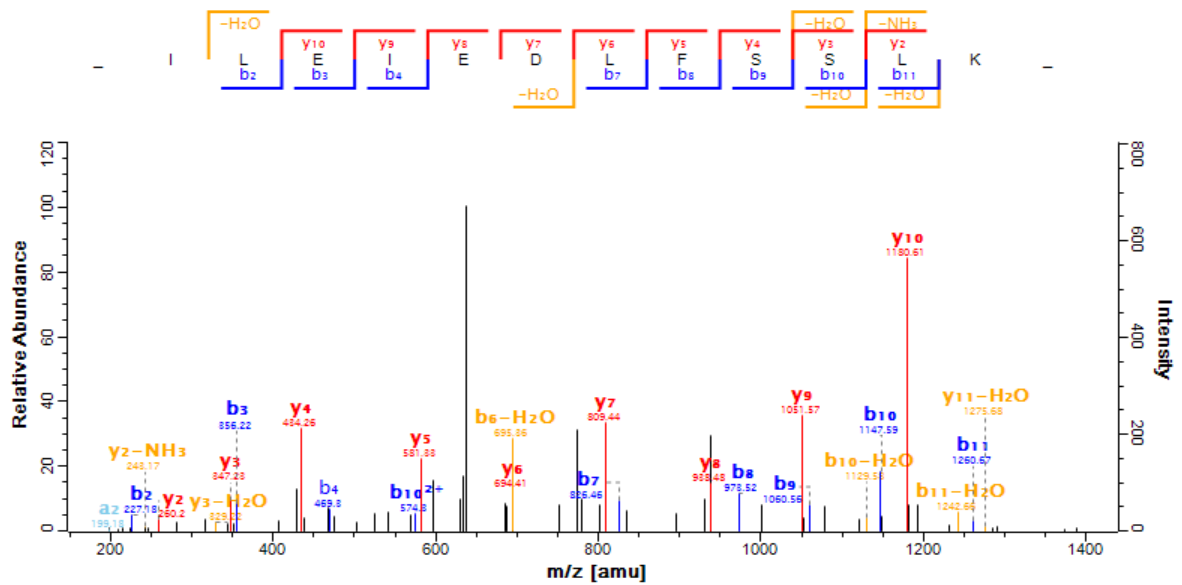

**Protein Group ID:** 868

**Protein Accession Numbers:** Q96FT9-2; Q96FT9; G3V385; Q96FT9-3; G3V4X2

**Gene Names:** IFT43

**Peptide Sequence:** MEDLLDLDEELR

**Total Number of Spectra:** 4

**Number of Replicates (out of 10):** 4

**Best Match Score:** 92.295

**Best Match Posterior Error Probability:** 0.00067979

**Best Match Spectrum:**

**Scan number** 6704      **Raw file** 20100930-KD-Batch5-Prt-OGE-WT-Frac4  
**Method** ITMS; CID      **Genenames** IFT43

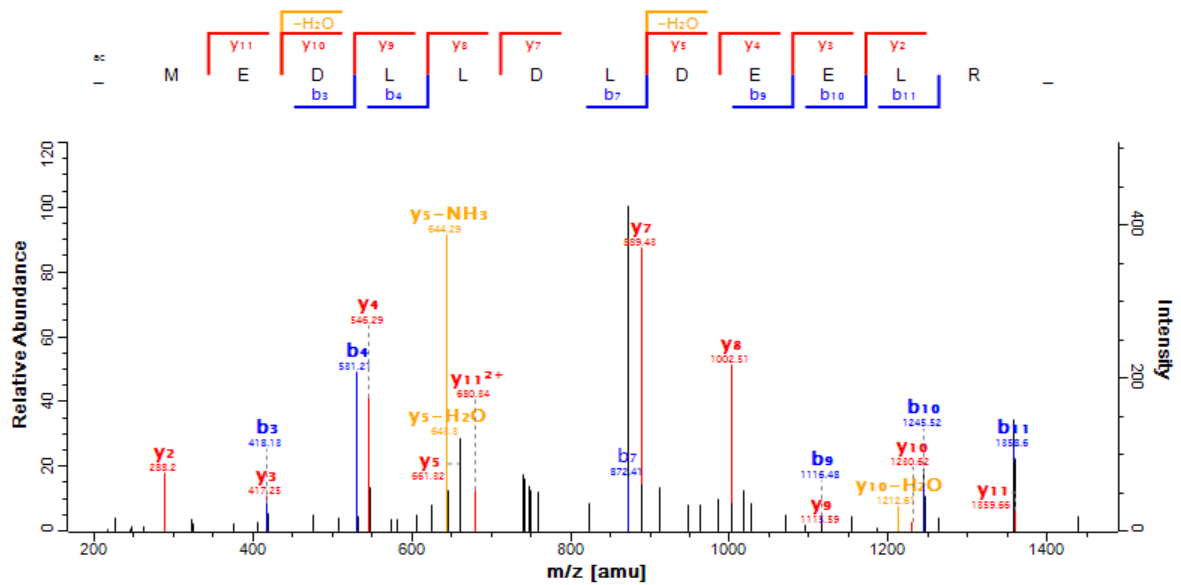

**Protein Group ID:** 869  
**Protein Accession Numbers:** Q96JQ2; G3V3D8  
**Gene Names:** CLMN  
**Peptide Sequence:** DLFVDIQDGK  
**Total Number of Spectra:** 1  
**Number of Replicates (out of 10):** 1  
**Best Match Score:** 85.958  
**Best Match Posterior Error Probability:** 0.0015831  
**Best Match Spectrum:**

**Scan number** 3894      **Raw file** Prt-OGE-Batch3-Mock-Frac7  
**Method** ITMS; CID      **Genenames** CLMN

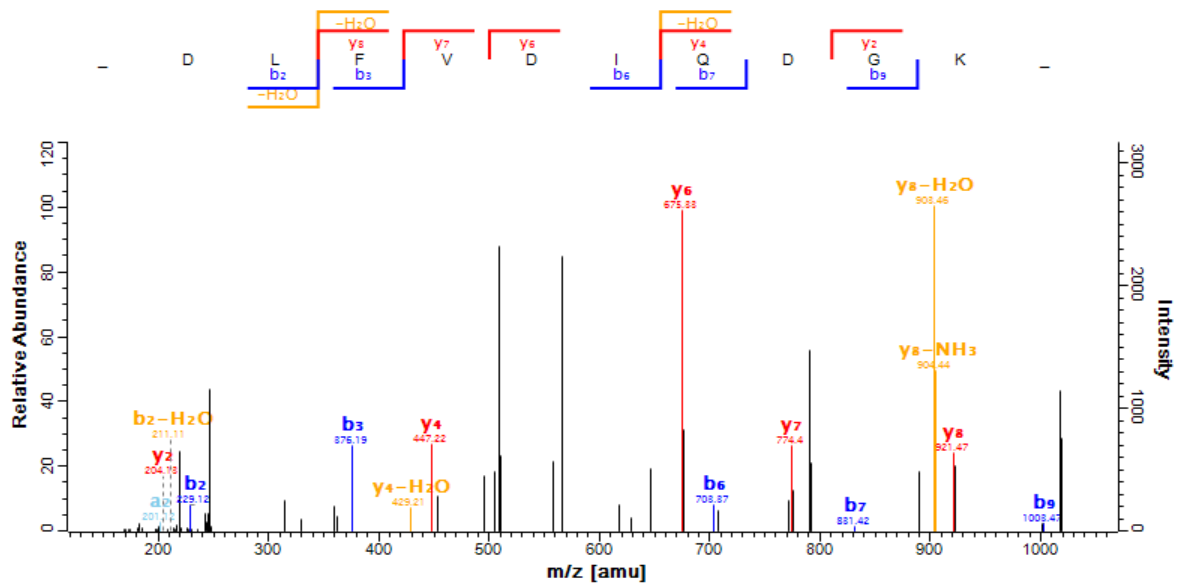

**Protein Group ID:** 870

**Protein Accession Numbers:** Q86TS9; Q86TS9-3; Q86TS9-2; G3V3U6

**Gene Names:** MRPL52

**Peptide Sequence:** VVLLSQEMDAGLQAWQLR

**Total Number of Spectra:** 2

**Number of Replicates (out of 10):** 2

**Best Match Score:** 124.2

**Best Match Posterior Error Probability:** 6.19E-05

**Best Match Spectrum:**

**Scan number** 5094      **Raw file** Prt-OGE-Batch2-WT-Frac22  
**Method** ITMS; CID      **Genenames** MRPL52

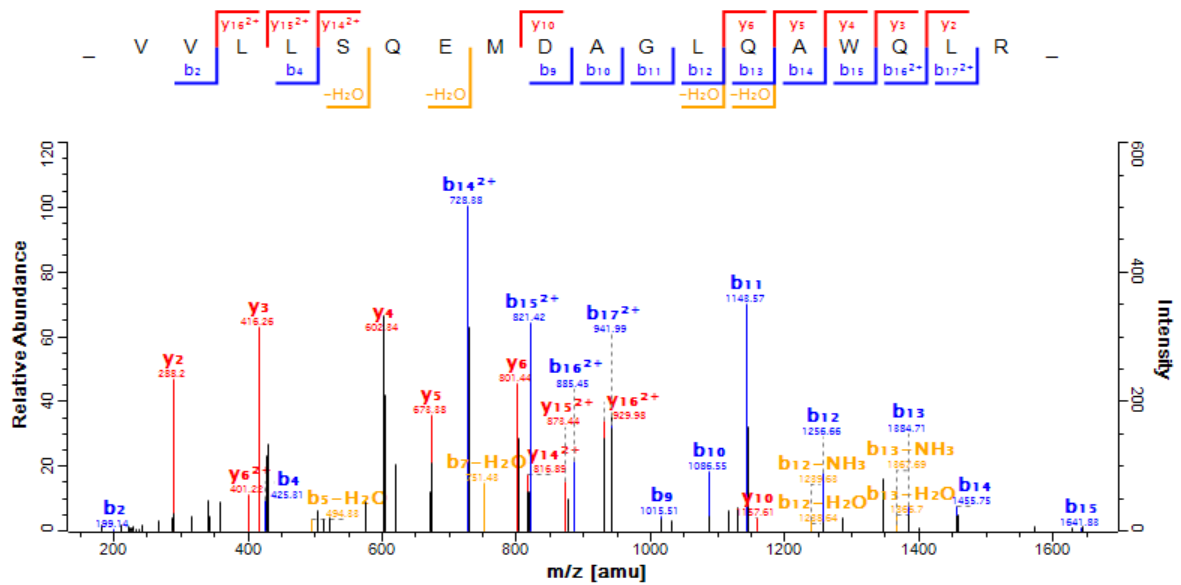



**Protein Group ID:** 884

**Protein Accession Numbers:** Q15653; Q15653-2; G5E9C2; I3L4X3

**Gene Names:** NFKB1B

**Peptide Sequence:** TPLGSAMLRPNPILAR

**Total Number of Spectra:** 4

**Number of Replicates (out of 10):** 4

**Best Match Score:** 117.93

**Best Match Posterior Error Probability:** 0.00040876

**Best Match Spectrum:**

|                    |           |                  |                         |
|--------------------|-----------|------------------|-------------------------|
| <b>Scan number</b> | 3748      | <b>Raw file</b>  | Prt-OGE-Batch3-WT-Frac5 |
| <b>Method</b>      | ITMS; CID | <b>Genenames</b> | NFKB1B                  |

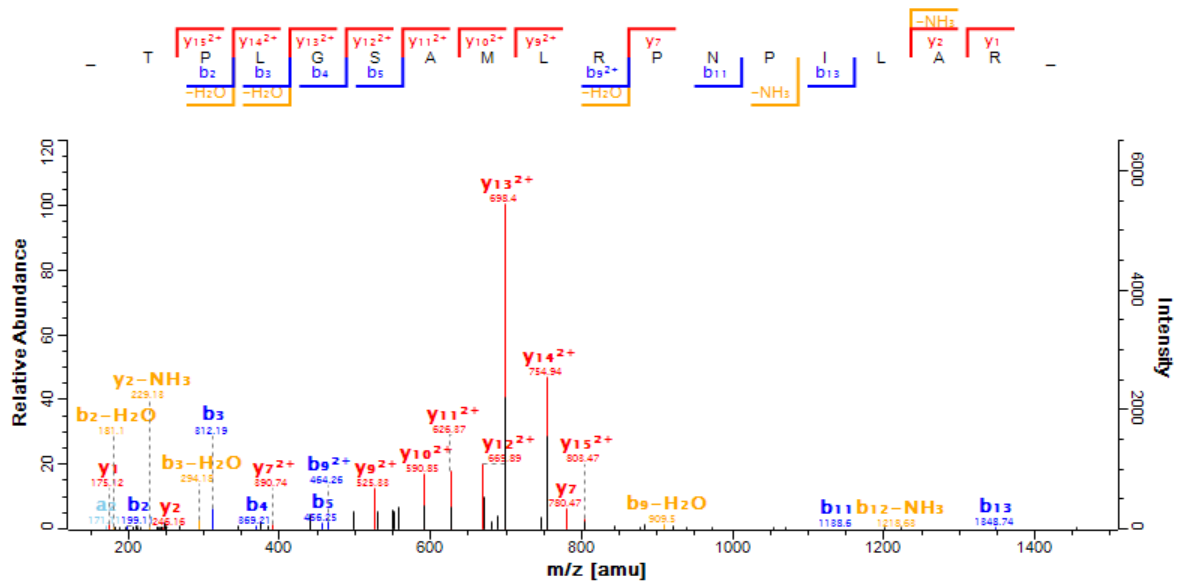

**Protein Group ID:** 894

**Protein Accession Numbers:** O14791-2; O14791; O14791-3; G8JL88

**Gene Names:** APOL1

**Peptide Sequence:** VTEPISGERS

**Total Number of Spectra:** 1

**Number of Replicates (out of 10):** 1

**Best Match Score:** 109.1

**Best Match Posterior Error Probability:** 5.78E-05

**Best Match Spectrum:**

|                    |           |                  |                          |
|--------------------|-----------|------------------|--------------------------|
| <b>Scan number</b> | 1416      | <b>Raw file</b>  | Prt-OGE-Batch3-WT-Frac11 |
| <b>Method</b>      | ITMS; CID | <b>Genenames</b> | APOL1                    |

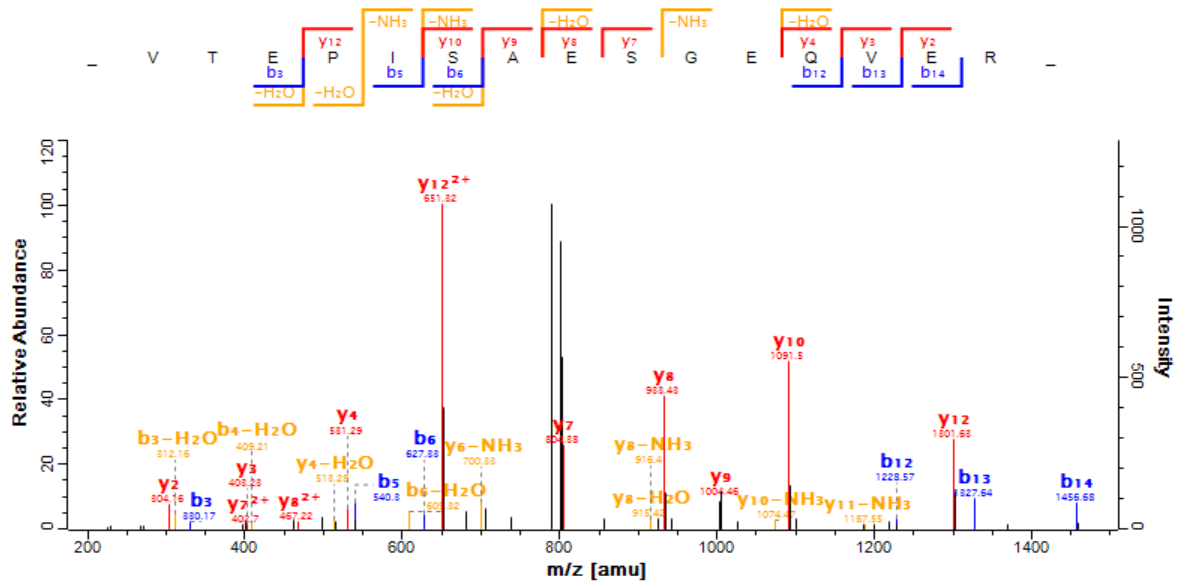

**Protein Group ID:** 897

**Protein Accession Numbers:** P51157; P51157-2; G8JLC5; Q8WVF3

**Gene Names:** RAB28

**Peptide Sequence:** IVVLGDGASGK

**Total Number of Spectra:** 1

**Number of Replicates (out of 10):** 1

**Best Match Score:** 85.958

**Best Match Posterior Error Probability:** 0.0013104

**Best Match Spectrum:**

**Scan number** 2031      **Raw file** 20100917-KD-Batch5-Prt-OGE-Mock-Frac17  
**Method** ITMS; CID      **Genenames** RAB28

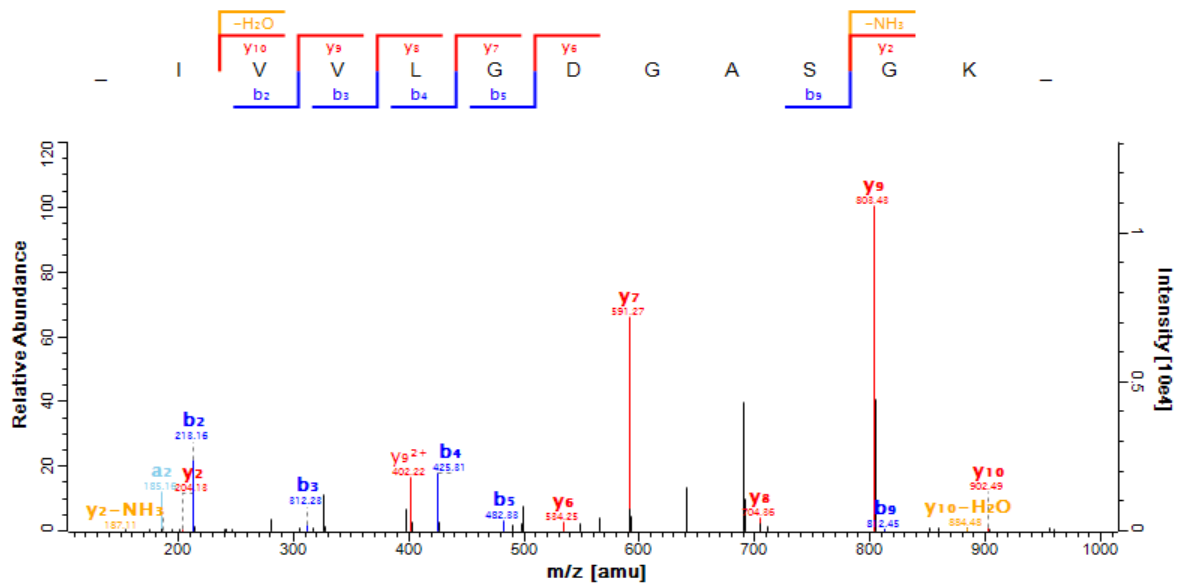

**Protein Group ID:** 898

**Protein Accession Numbers:** G8JLC6; Q5JRA6; Q5JRA6-2; H7BY50

**Gene Names:** MIA3

**Peptide Sequence:** EDLLISSFFK

**Total Number of Spectra:** 1

**Number of Replicates (out of 10):** 1

**Best Match Score:** 102.4

**Best Match Posterior Error Probability:** 0.00023694

**Best Match Spectrum:**

|                    |           |                  |                                     |
|--------------------|-----------|------------------|-------------------------------------|
| <b>Scan number</b> | 6554      | <b>Raw file</b>  | 20100930-KD-Batch5-Prt-OGE-WT-Frac4 |
| <b>Method</b>      | ITMS; CID | <b>Genenames</b> | MIA3                                |

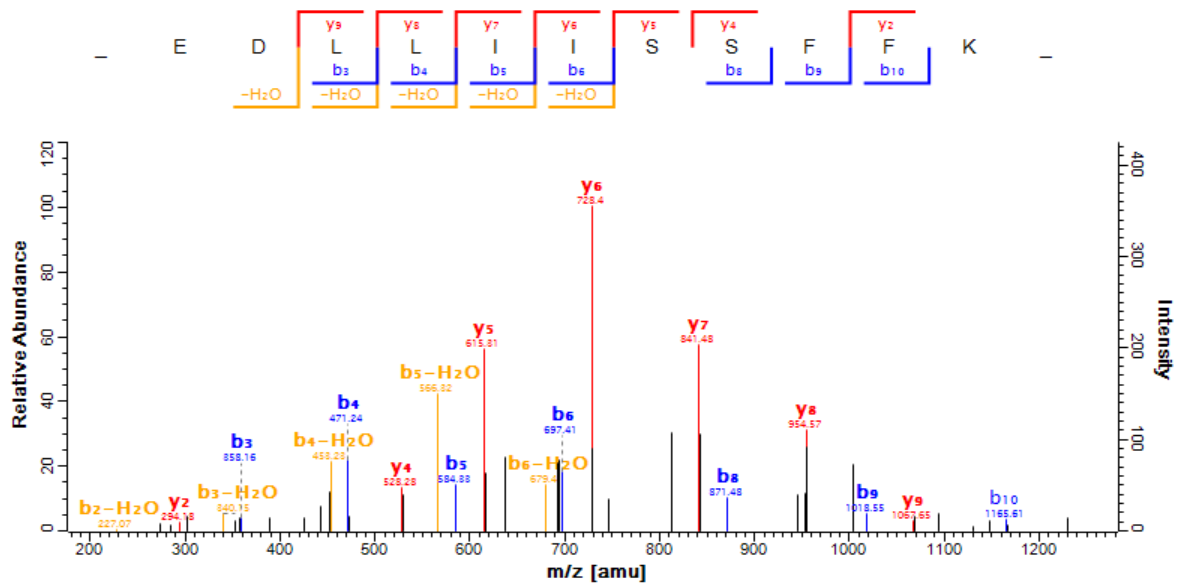

**Protein Group ID:** 901  
**Protein Accession Numbers:** Q9BVW5; G8JLE5  
**Gene Names:** TIPIN  
**Peptide Sequence:** NVQQQLDATSR  
**Total Number of Spectra:** 2  
**Number of Replicates (out of 10):** 2  
**Best Match Score:** 110.08  
**Best Match Posterior Error Probability:** 0.00015077  
**Best Match Spectrum:**

**Scan number** 2123      **Raw file** OGE-Mock-Frac4  
**Method** ITMS; CID      **Genenames** TIPIN

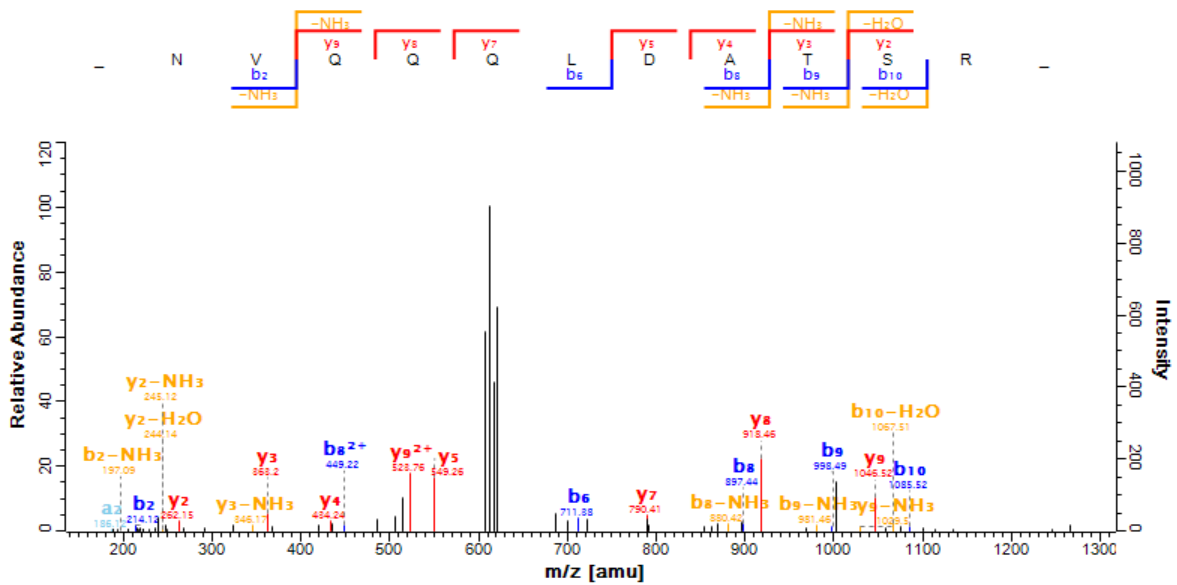

**Protein Group ID:** 904  
**Protein Accession Numbers:** P47895; H0Y2X5  
**Gene Names:** ALDH1A3  
**Peptide Sequence:** PTVFSEVTDNMR  
**Total Number of Spectra:** 1  
**Number of Replicates (out of 10):** 1  
**Best Match Score:** 123.67  
**Best Match Posterior Error Probability:** 0.00020502  
**Best Match Spectrum:**

**Scan number** 5127      **Raw file** 20100917-KD-Batch5-Prt-OGE-Mock-Frac14  
**Method** ITMS; CID      **Genenames** ALDH1A3

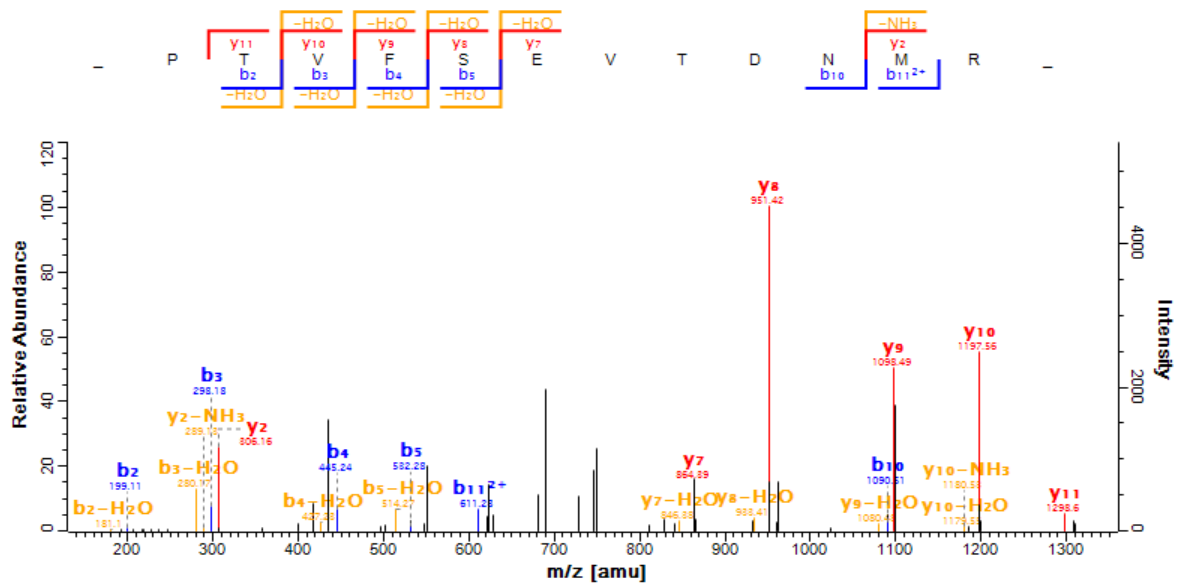

**Protein Group ID:** 906

**Protein Accession Numbers:** Q9NPB8; H0Y565

**Gene Names:** GPCPD1

**Peptide Sequence:** TTPIAMSFAQFENLLGLINVTHTEDLLR

**Total Number of Spectra:** 4

**Number of Replicates (out of 10):** 4

**Best Match Score:** 92.932

**Best Match Posterior Error Probability:** 6.01E-08

**Best Match Spectrum:**

**Scan number** 8365      **Raw file** Prt-OGE-Batch3-Mock-Frac8  
**Method** ITMS; CID      **Genenames** GPCPD1

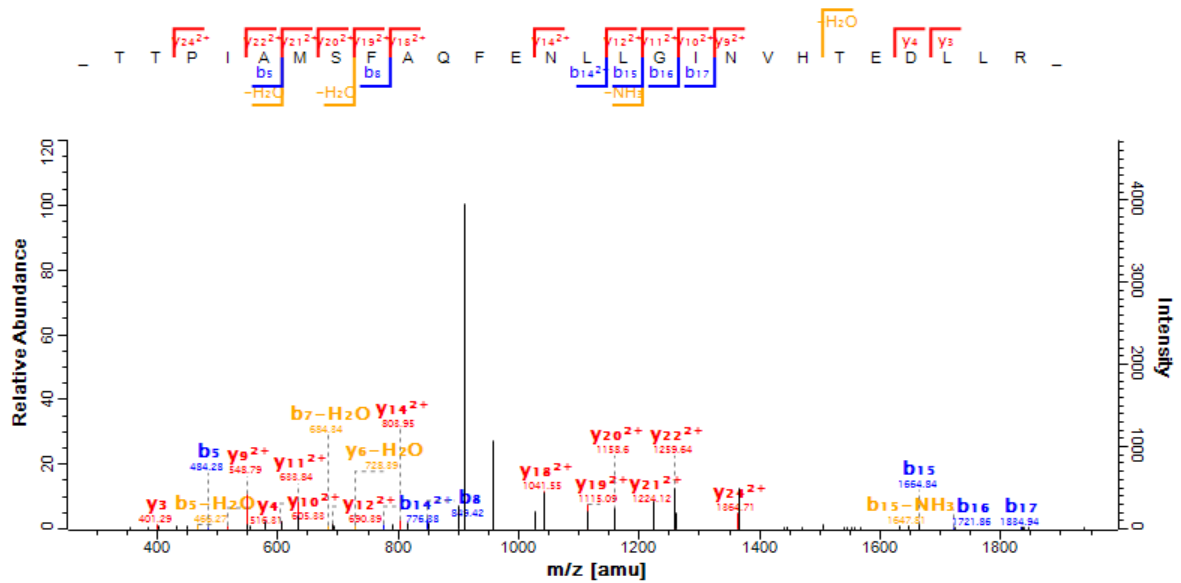

**Protein Group ID:** 911  
**Protein Accession Numbers:** H0Y701  
**Gene Names:** CCDC171  
**Peptide Sequence:** UFELFKLEIR  
**Total Number of Spectra:** 2  
**Number of Replicates (out of 10):** 2  
**Best Match Score:** 101.65  
**Best Match Posterior Error Probability:** 0.0016335  
**Best Match Spectrum:**

**Scan number** 1522      **Raw file** 20100927-KD-Batch4-Prt-OGE-WT-Frac4  
**Method** ITMS; CID      **Genenames** CCDC171

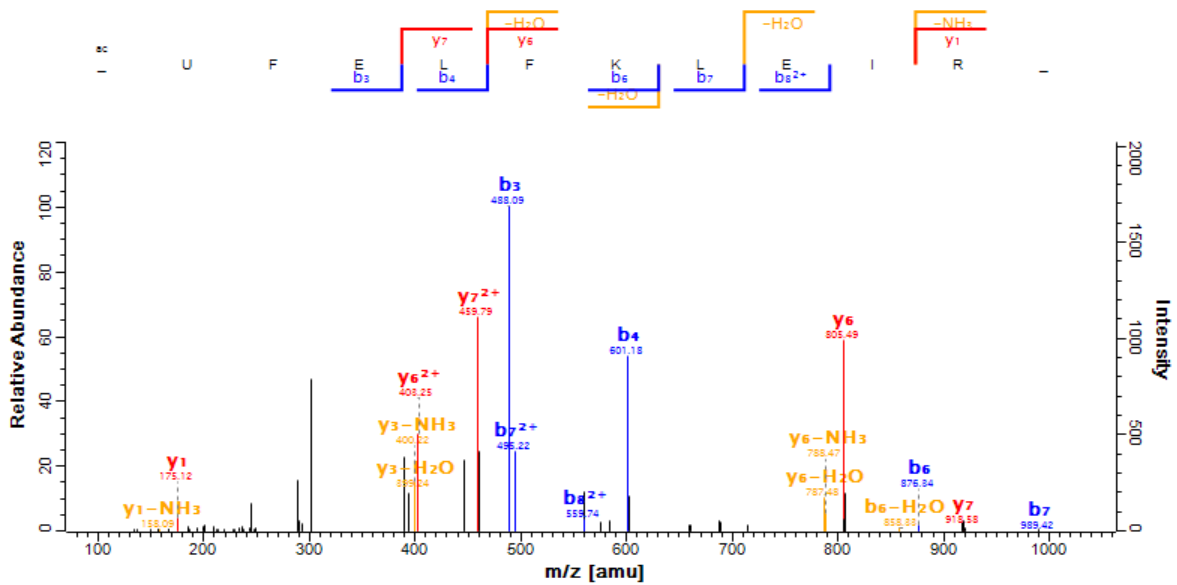



**Protein Group ID:** 915  
**Protein Accession Numbers:** P20933; H0Y9C7  
**Gene Names:** AGA  
**Peptide Sequence:** FLPSYQAVEYMR  
**Total Number of Spectra:** 4  
**Number of Replicates (out of 10):** 4  
**Best Match Score:** 195.77  
**Best Match Posterior Error Probability:** 1.60E-22  
**Best Match Spectrum:**

**Scan number** 4005      **Raw file** 20100917-KD-Batch5-Prt-OGE-Mock-Frac20  
**Method** ITMS; CID      **Genenames** AGA

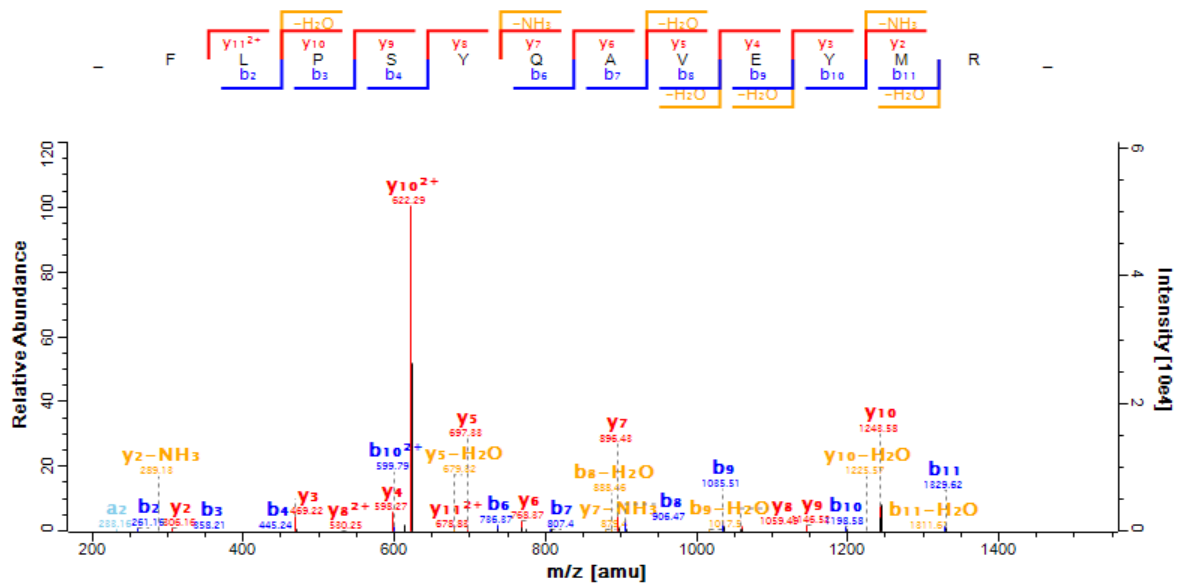

**Protein Group ID:** 916

**Protein Accession Numbers:** Q9H7D7; Q9H7D7-2; H0Y9R3

**Gene Names:** WDR26

**Peptide Sequence:** LALLNVATQGVHLWDLQDR

**Total Number of Spectra:** 1

**Number of Replicates (out of 10):** 1

**Best Match Score:** 77.324

**Best Match Posterior Error Probability:** 0.0017036

**Best Match Spectrum:**

**Scan number** 6297      **Raw file** 20100917-KD-Batch5-Prt-OGE-Mock-Frac12  
**Method** ITMS; CID      **Genenames** WDR26

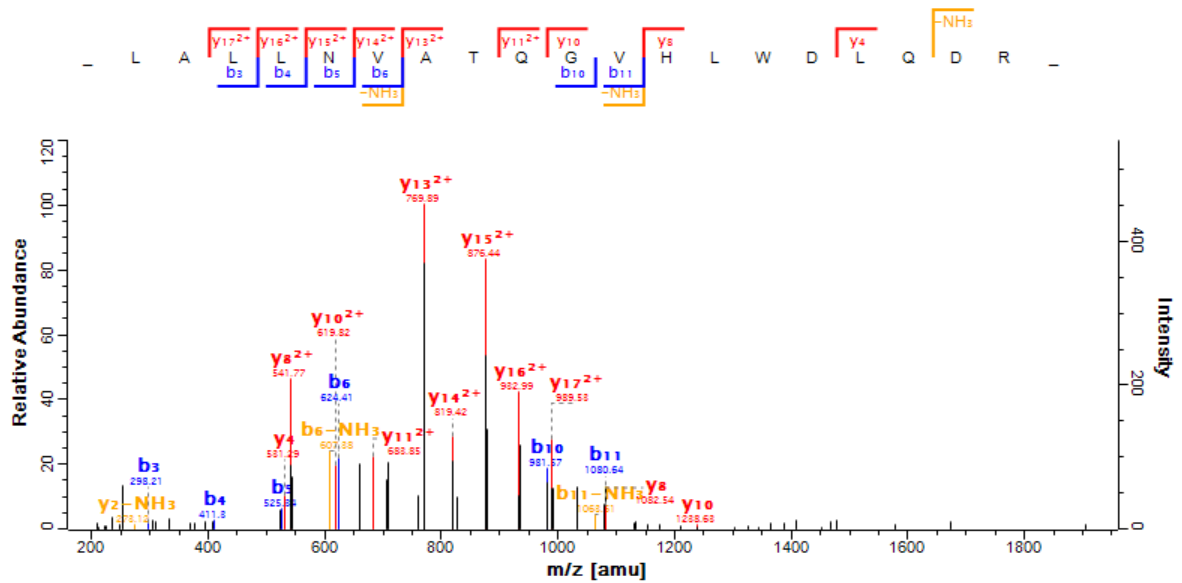

**Protein Group ID:** 918  
**Protein Accession Numbers:** H0YAA8; Q9H204  
**Gene Names:** MED28  
**Peptide Sequence:** HWQQVLEDINVQHK  
**Total Number of Spectra:** 1  
**Number of Replicates (out of 10):** 1  
**Best Match Score:** 122.34  
**Best Match Posterior Error Probability:** 6.73E-05  
**Best Match Spectrum:**

**Scan number** 3868      **Raw file** Prt-OGE-Batch3-Mock-Frac7  
**Method** ITMS; CID      **Genenames** MED28

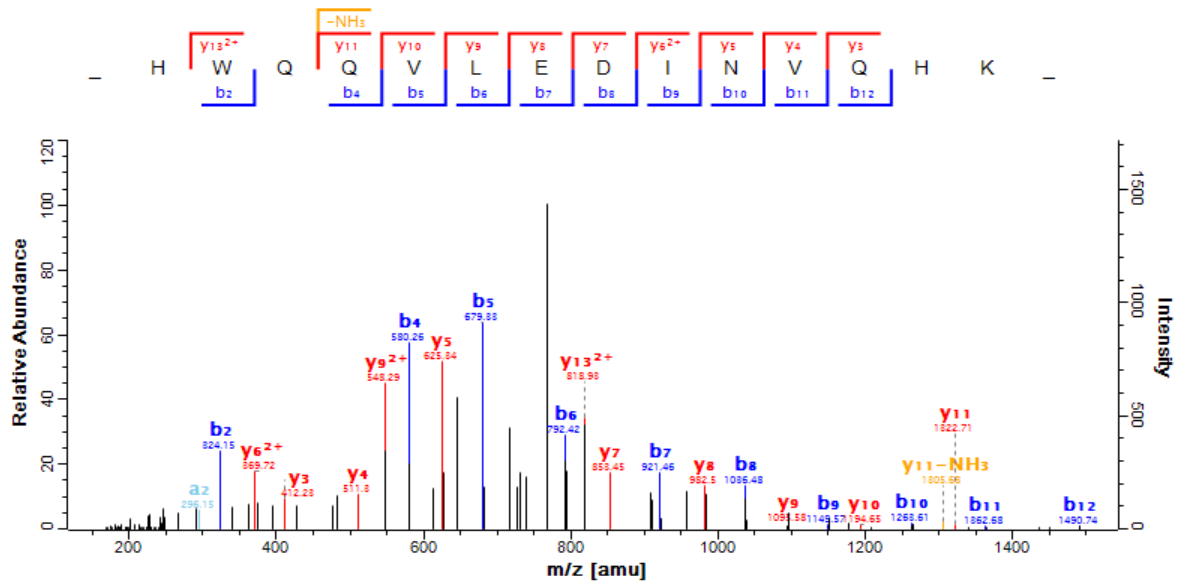

**Protein Group ID:** 923

**Protein Accession Numbers:** O14893; O14893-2; O14893-3; H0YEL0; H0YDP6

**Gene Names:** GEMIN2

**Peptide Sequence:** SSQLDSNVTMPK

**Total Number of Spectra:** 2

**Number of Replicates (out of 10):** 2

**Best Match Score:** 111.79

**Best Match Posterior Error Probability:** 0.00019531

**Best Match Spectrum:**

|                    |           |                  |                           |
|--------------------|-----------|------------------|---------------------------|
| <b>Scan number</b> | 2608      | <b>Raw file</b>  | Prt-OGE-Batch2-Mock-Frac6 |
| <b>Method</b>      | ITMS; CID | <b>Genenames</b> | GEMIN2                    |

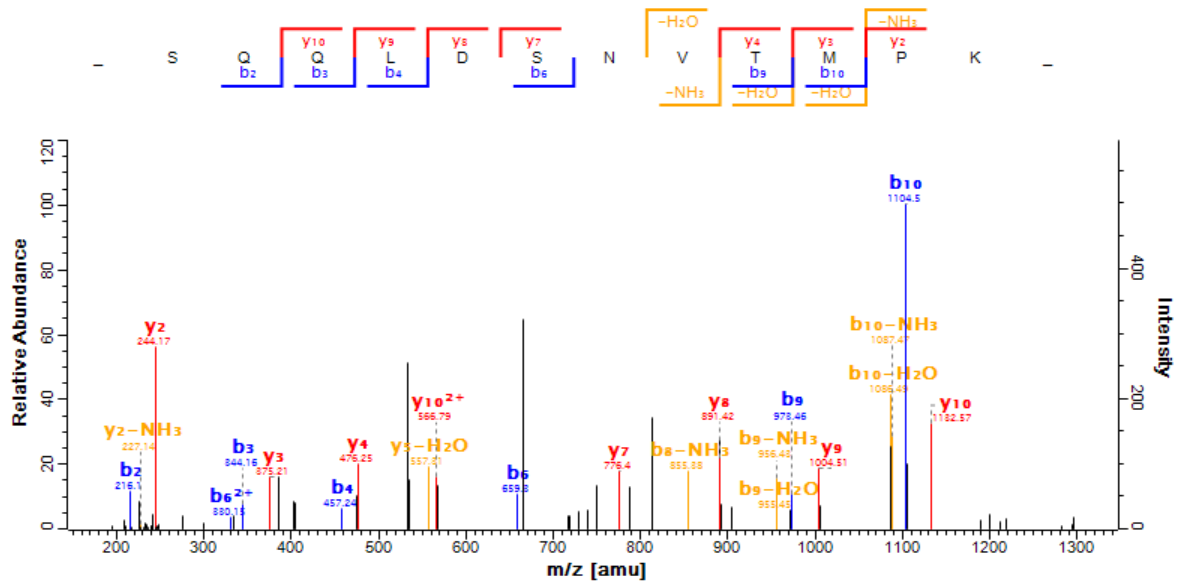

**Protein Group ID:** 929

**Protein Accession Numbers:** Q6P1R4; J3QLE4; H0YGW8; J3QKP9

**Gene Names:** DUS1L

**Peptide Sequence:** SPAVWELAAEEYLDIR

**Total Number of Spectra:** 2

**Number of Replicates (out of 10):** 1

**Best Match Score:** 109.79

**Best Match Posterior Error Probability:** 0.00012942

**Best Match Spectrum:**

|                    |           |                  |                                        |
|--------------------|-----------|------------------|----------------------------------------|
| <b>Scan number</b> | 7432      | <b>Raw file</b>  | 20100917-KD-Batch5-Prt-OGE-Mock-Frac20 |
| <b>Method</b>      | ITMS; CID | <b>Genenames</b> | DUS1L                                  |

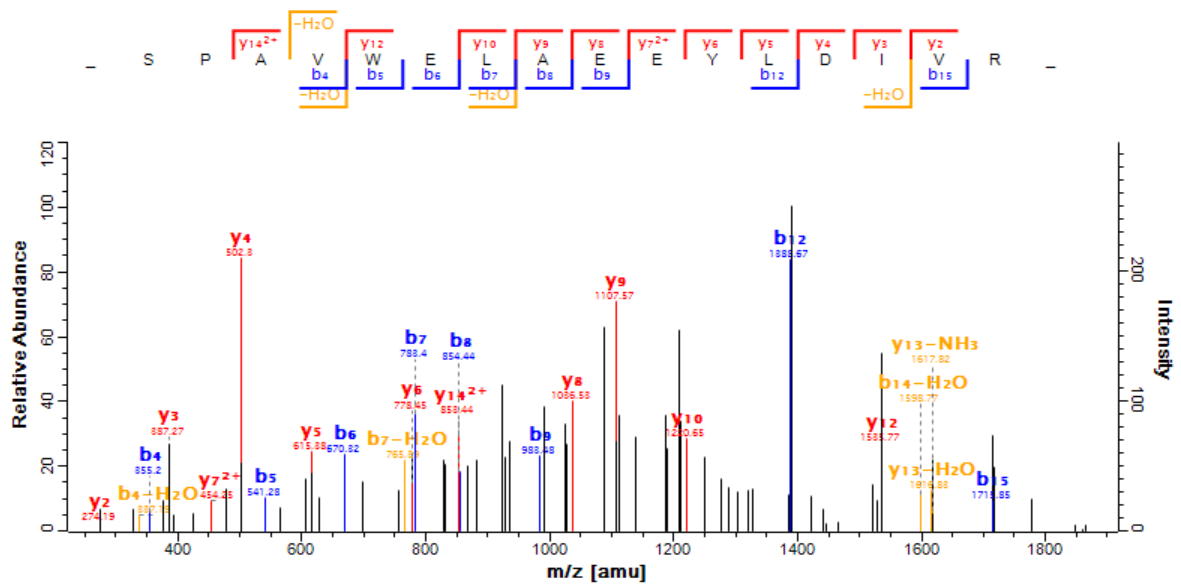

**Protein Group ID:** 934

**Protein Accession Numbers:** Q6FIF0; Q6FIF0-2; H0YK54; H0YK21; H0YME2; H0YLR2; H0YMR5

**Gene Names:** ZFAND6

**Peptide Sequence:** AVPETEDVQASVSDTAQQPSEEQSK

**Total Number of Spectra:** 2

**Number of Replicates (out of 10):** 2

**Best Match Score:** 126.97

**Best Match Posterior Error Probability:** 7.24E-17

**Best Match Spectrum:**

|                    |           |                  |                            |
|--------------------|-----------|------------------|----------------------------|
| <b>Scan number</b> | 3134      | <b>Raw file</b>  | Prt-OGE-Batch2-Mock-Frac12 |
| <b>Method</b>      | ITMS: CID | <b>Genenames</b> | ZFAND6                     |

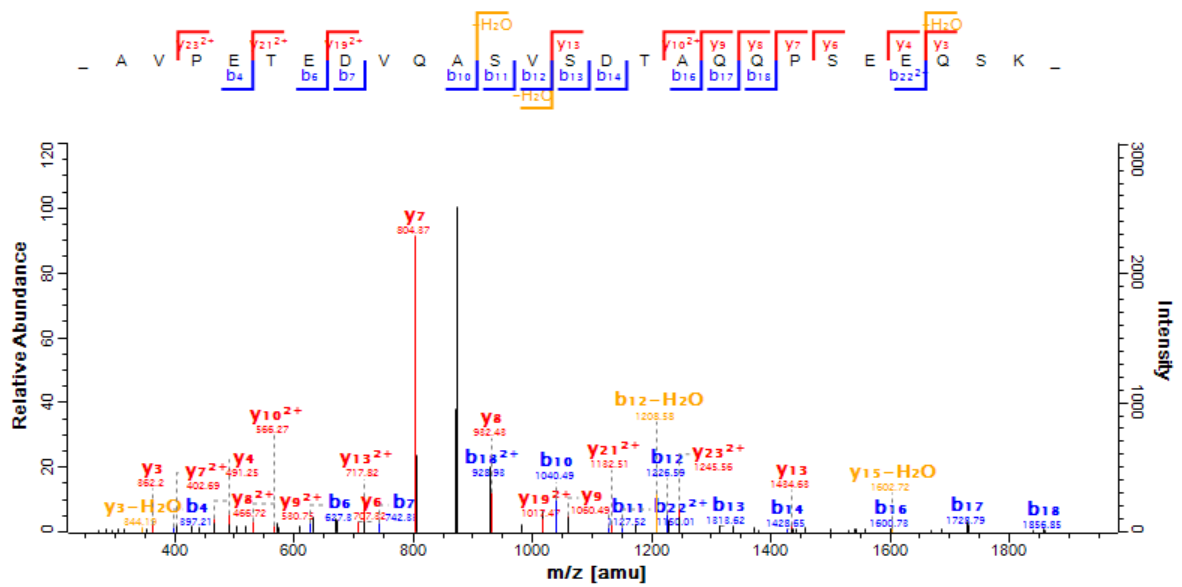

**Protein Group ID:** 935

**Protein Accession Numbers:** H0YK83; P67812; H0YK72; H0YNG3; H0YKT4

**Gene Names:** SEC11A

**Peptide Sequence:** MLSLDFLDDVR

**Total Number of Spectra:** 2

**Number of Replicates (out of 10):** 2

**Best Match Score:** 85.288

**Best Match Posterior Error Probability:** 0.0014464

**Best Match Spectrum:**

**Scan number** 4624      **Raw file** Prt-OGE-Batch3-WT-Frac1  
**Method** ITMS; CID      **Genenames** SEC11A

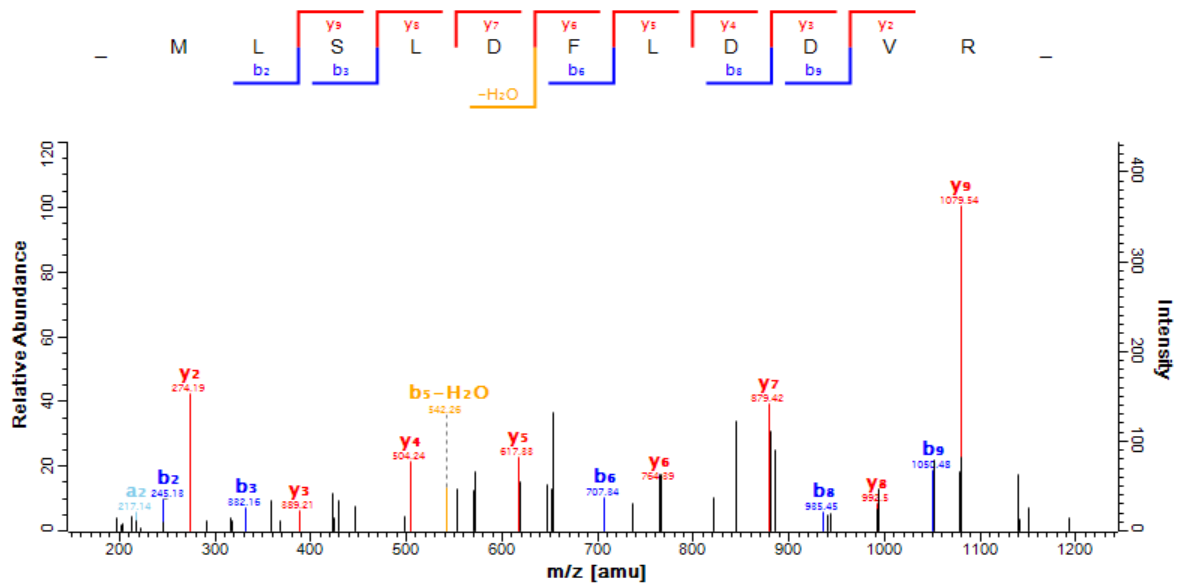

**Protein Group ID:** 936

**Protein Accession Numbers:** Q9NVM6; H0YK99; H0YLQ7

**Gene Names:** DNAJC17

**Peptide Sequence:** AAELFHQLSQALEVLTDAAR

**Total Number of Spectra:** 7

**Number of Replicates (out of 10):** 6

**Best Match Score:** 101.67

**Best Match Posterior Error Probability:** 1.05E-05

**Best Match Spectrum:**

|                    |           |                  |                                        |
|--------------------|-----------|------------------|----------------------------------------|
| <b>Scan number</b> | 7815      | <b>Raw file</b>  | 20100914-KD-Batch4-Prt-OGE-Mock-Frac17 |
| <b>Method</b>      | ITMS; CID | <b>Genenames</b> | DNAJC17                                |

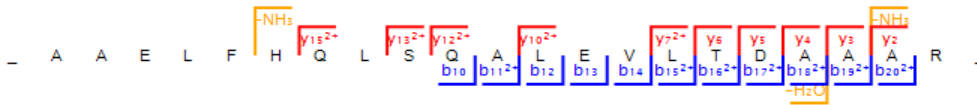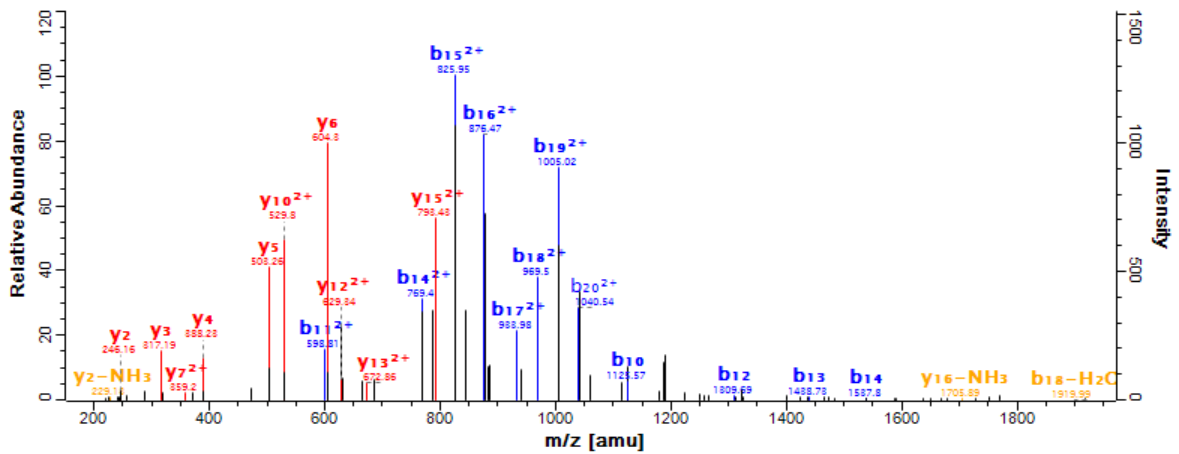





**Protein Group ID:** 939  
**Protein Accession Numbers:** Q9Y5S2; H0YLY0  
**Gene Names:** CDC42BPB  
**Peptide Sequence:** LPDFQDSIFEYFNTAPLAHDLTFR  
**Total Number of Spectra:** 7  
**Number of Replicates (out of 10):** 7  
**Best Match Score:** 133.41  
**Best Match Posterior Error Probability:** 5.61E-17  
**Best Match Spectrum:**

**Scan number** 6459      **Raw file** Prt-OGE-Batch2-WT-Frac13  
**Method** ITMS; CID      **Genenames** CDC42BPB

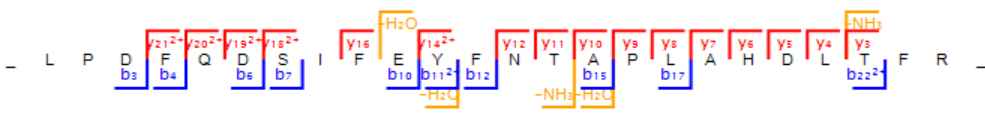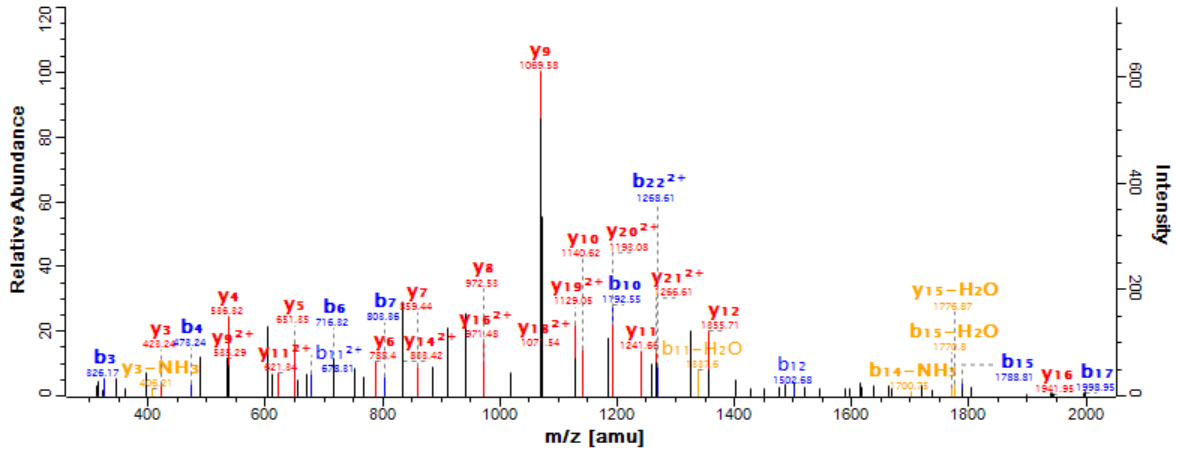

**Protein Group ID:** 940

**Protein Accession Numbers:** O94788; O94788-3; H0YMG7; O94788-2; H0YM00

**Gene Names:** ALDH1A2

**Peptide Sequence:** IFVEESIYEEFVR

**Total Number of Spectra:** 20

**Number of Replicates (out of 10):** 2

**Best Match Score:** 149.41

**Best Match Posterior Error Probability:** 1.07E-05

**Best Match Spectrum:**

**Scan number** 6020      **Raw file** 20100930-KD-Batch5-Prt-OGE-WT-Frac14  
**Method** ITMS; CID      **Genenames** ALDH1A2

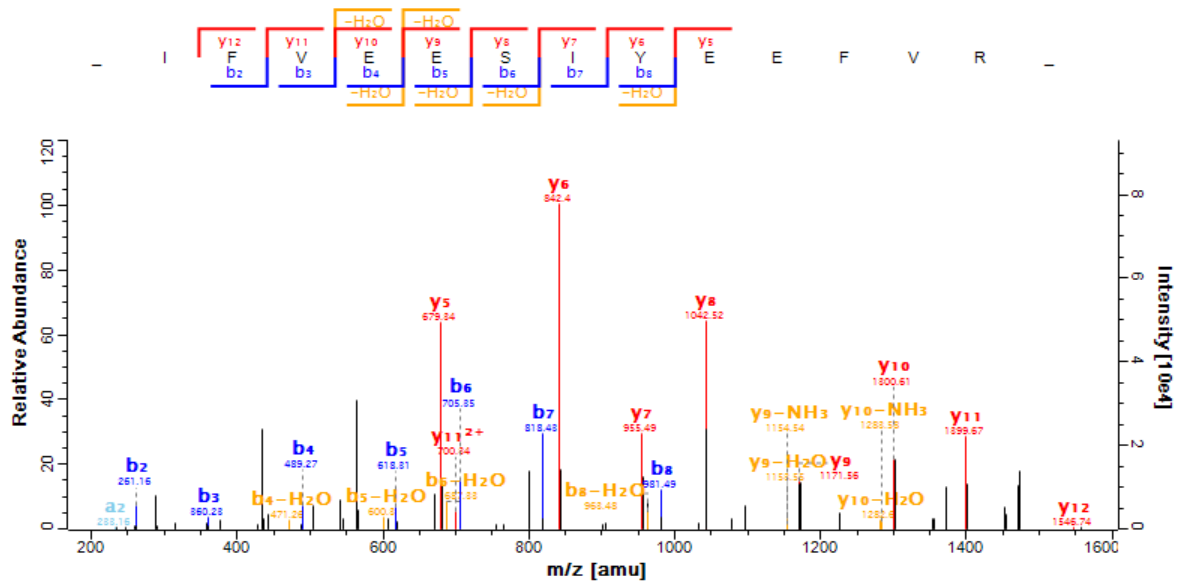

**Protein Group ID:** 941  
**Protein Accession Numbers:** Q9NPE3; H0YM60  
**Gene Names:** NOP10  
**Peptide Sequence:** MFLQYYLNEQGDR  
**Total Number of Spectra:** 3  
**Number of Replicates (out of 10):** 2  
**Best Match Score:** 254.89  
**Best Match Posterior Error Probability:** 0  
**Best Match Spectrum:**

**Scan number** 4033      **Raw file** Prt-OGE-Batch2-WT-Frac23  
**Method** ITMS; CID      **Genenames** NOP10

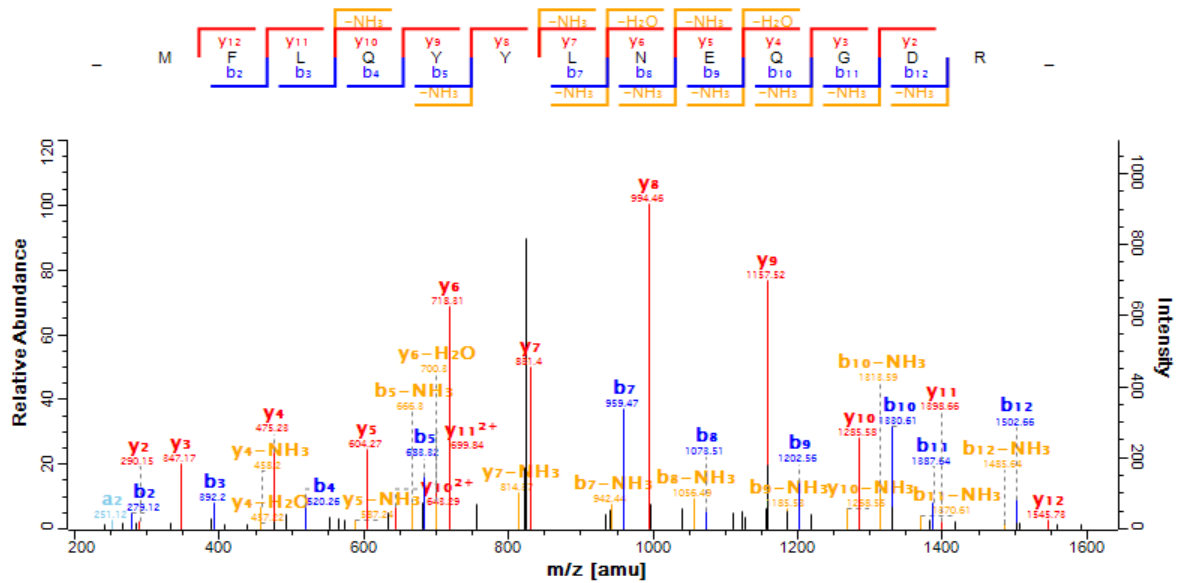

**Protein Group ID:** 943

**Protein Accession Numbers:** Q96TC7; Q96TC7-2; H0YMB1

**Gene Names:** FAM82A2

**Peptide Sequence:** TATALLESPLSATVEDALQSFLK

**Total Number of Spectra:** 6

**Number of Replicates (out of 10):** 4

**Best Match Score:** 117.84

**Best Match Posterior Error Probability:** 6.23E-10

**Best Match Spectrum:**

|                    |           |                  |                                     |
|--------------------|-----------|------------------|-------------------------------------|
| <b>Scan number</b> | 9152      | <b>Raw file</b>  | 20100927-KD-Batch4-Prt-OGE-WT-Frac8 |
| <b>Method</b>      | ITMS; CID | <b>Genenames</b> | FAM82A2                             |

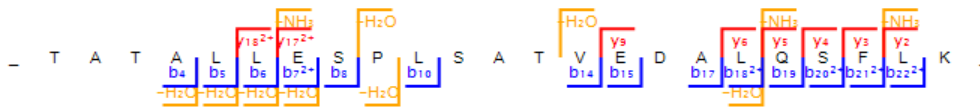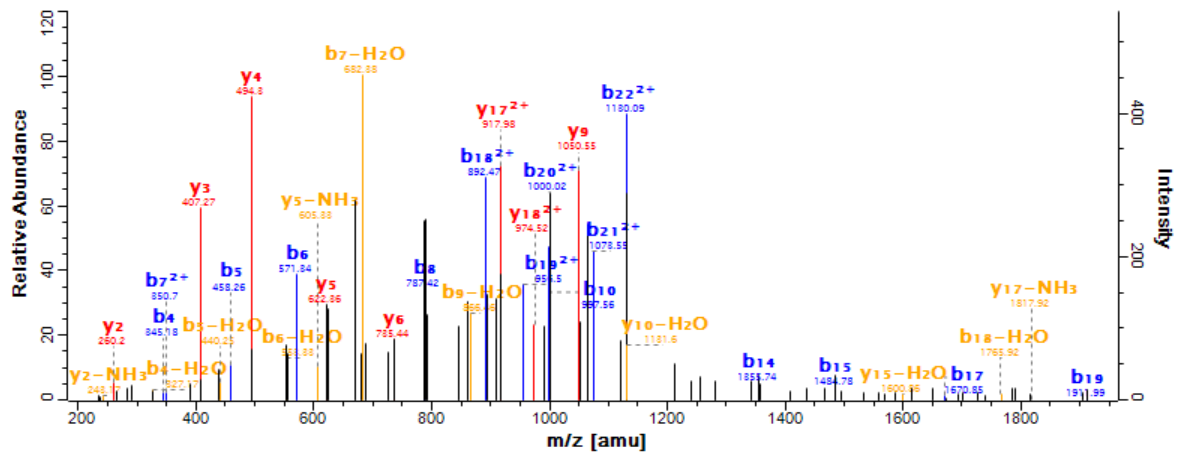

**Protein Group ID:** 944

**Protein Accession Numbers:** Q8TEX9-2; Q8TEX9; H0YMR4; H0YN07

**Gene Names:** IPO4

**Peptide Sequence:** LLGLLFLLAR

**Total Number of Spectra:** 13

**Number of Replicates (out of 10):** 5

**Best Match Score:** 99.815

**Best Match Posterior Error Probability:** 0.00027027

**Best Match Spectrum:**

**Scan number** 7995      **Raw file** 20100930-KD-Batch5-Prt-OGE-WT-Frac13  
**Method** ITMS; CID      **Genenames** IPO4

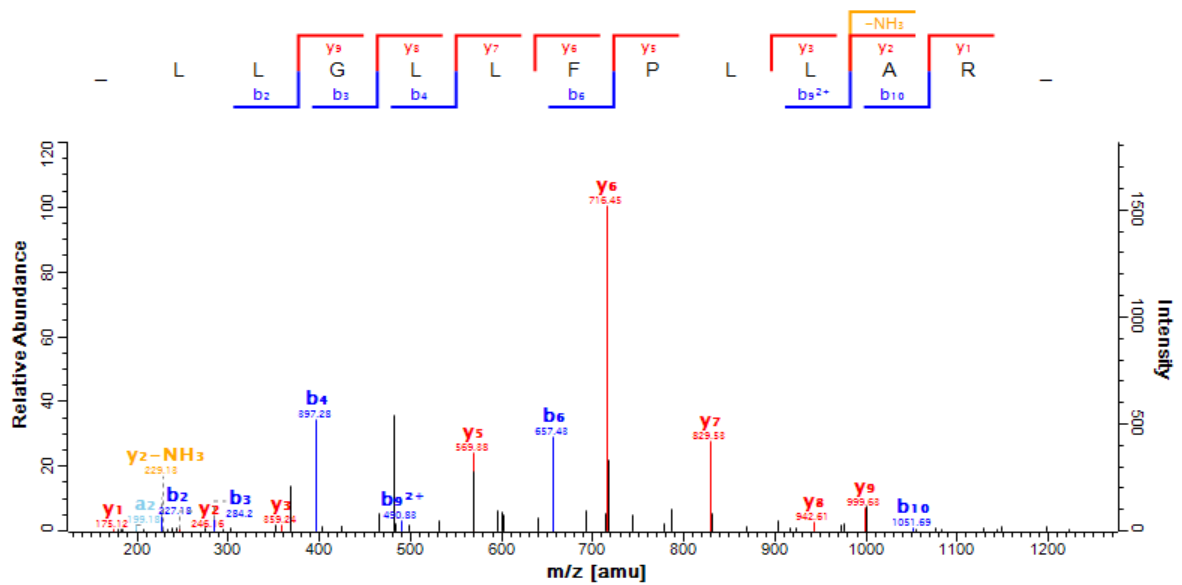

**Protein Group ID:** 954

**Protein Accession Numbers:** H3BM74; H3BM14; Q9Y5A7; Q9Y5A7-2; H7C5N1; H7C5E1

**Gene Names:** NUB1

**Peptide Sequence:** ACDGNVDHAATHITNR

**Total Number of Spectra:** 1

**Number of Replicates (out of 10):** 1

**Best Match Score:** 90.444

**Best Match Posterior Error Probability:** 0.00040812

**Best Match Spectrum:**

|                    |           |                  |                                      |
|--------------------|-----------|------------------|--------------------------------------|
| <b>Scan number</b> | 922       | <b>Raw file</b>  | 20100930-KD-Batch5-Prt-OGE-WT-Frac18 |
| <b>Method</b>      | ITMS; CID | <b>Genenames</b> | NUB1                                 |

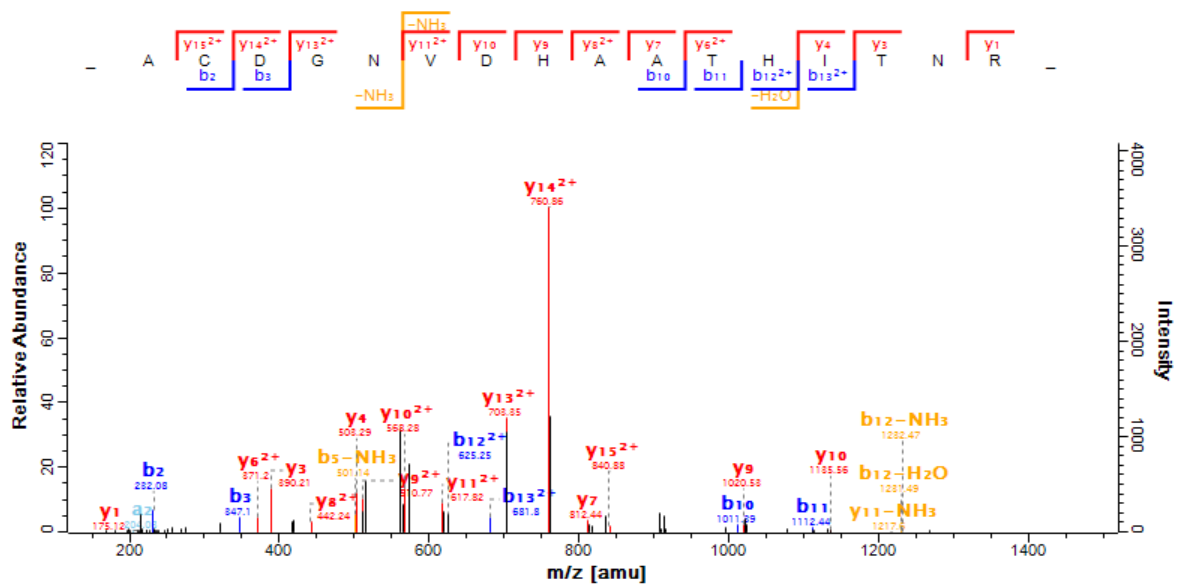

**Protein Group ID:** 955

**Protein Accession Numbers:** Q9BV79; Q9BV79-2; H3BM30; Q5SYU3

**Gene Names:** MECR

**Peptide Sequence:** SLGAEHVITEELR

**Total Number of Spectra:** 5

**Number of Replicates (out of 10):** 5

**Best Match Score:** 123.84

**Best Match Posterior Error Probability:** 6.01E-05

**Best Match Spectrum:**

**Scan number** 3638      **Raw file** Prt-OGE-Batch2-Mock-Frac1 8  
**Method** ITMS; CID      **Genenames** MECR

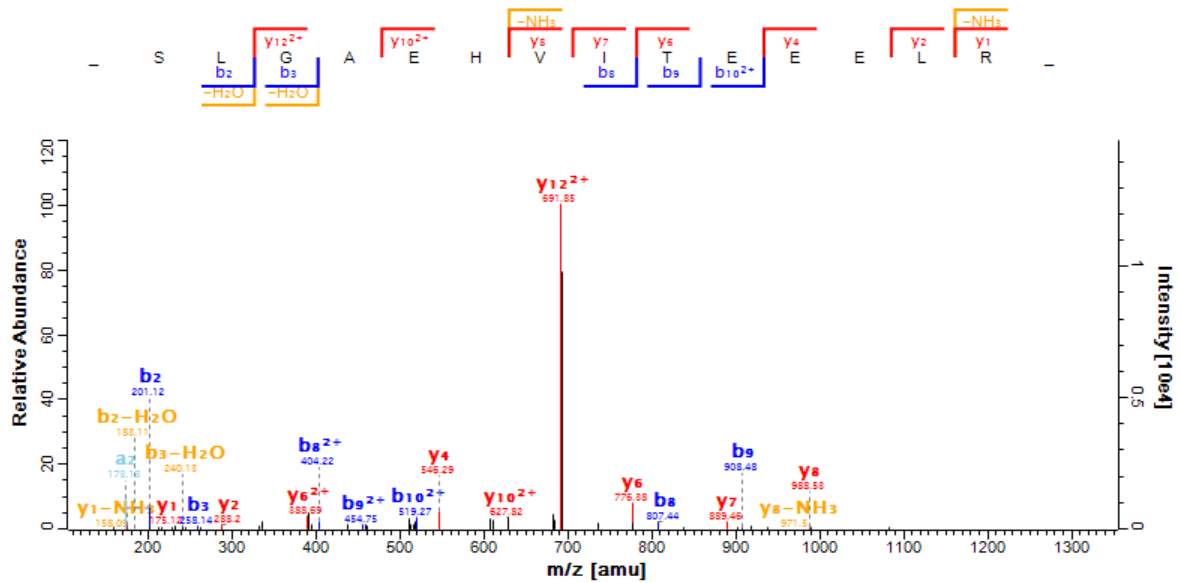



**Protein Group ID:** 956  
**Protein Accession Numbers:** H3BM91; Q9H0A8  
**Gene Names:** COMMD4  
**Peptide Sequence:** VDYTLSSSLLQSVEEPMVHLR  
**Total Number of Spectra:** 1  
**Number of Replicates (out of 10):** 1  
**Best Match Score:** 81.428  
**Best Match Posterior Error Probability:** 0.00030407  
**Best Match Spectrum:**

**Scan number** 6260      **Raw file** 20100914-KD-Batch4-Prt-OGE-Mock-Frac16  
**Method** ITMS; CID      **Genenames** COMMD4

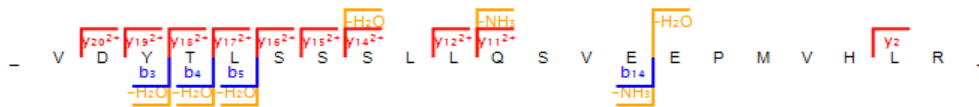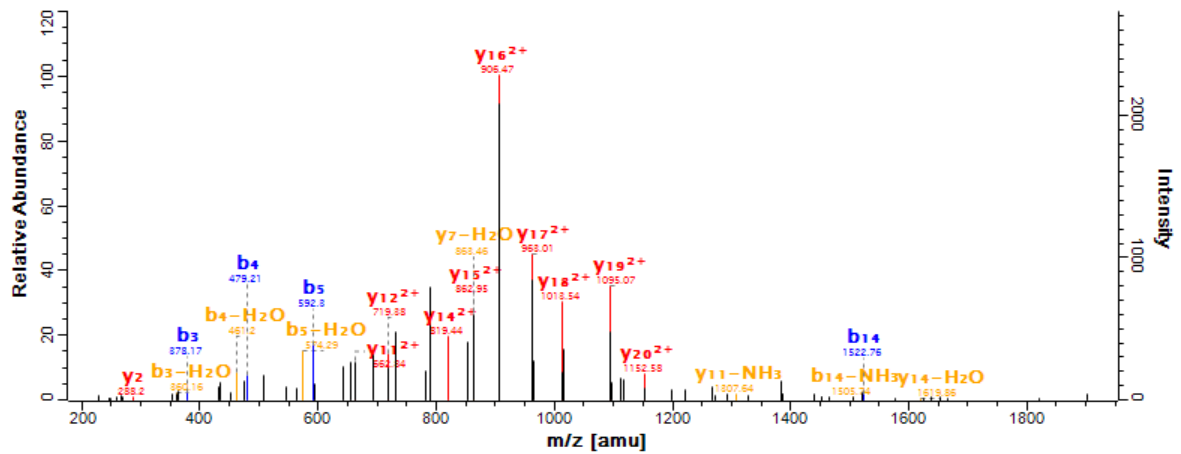

**Protein Group ID:** 959

**Protein Accession Numbers:** Q9NVM4; Q9NVM4-3; H3BNC0; Q9NVM4-4; H3BPZ8; H3BSS9

**Gene Names:** PRMT7

**Peptide Sequence:** ANILVTELFDEGLGEGALPSYEAHR

**Total Number of Spectra:** 6

**Number of Replicates (out of 10):** 5

**Best Match Score:** 115.96

**Best Match Posterior Error Probability:** 4.26E-17

**Best Match Spectrum:**

|                    |           |                  |                           |
|--------------------|-----------|------------------|---------------------------|
| <b>Scan number</b> | 7339      | <b>Raw file</b>  | Prt-OGE-Batch3-Mock-Frac8 |
| <b>Method</b>      | ITMS; CID | <b>Genenames</b> | PRMT7                     |

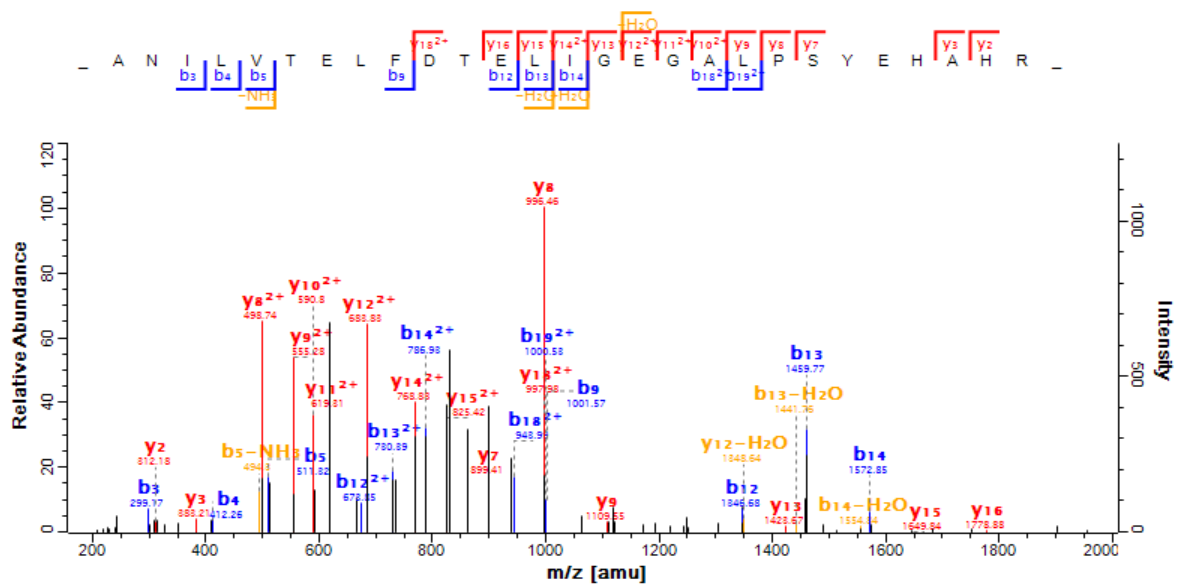

**Protein Group ID:** 960  
**Protein Accession Numbers:** O00221; H3BNC2  
**Gene Names:** NFKBIE  
**Peptide Sequence:** KGPDEAESQYDSGIESLR  
**Total Number of Spectra:** 3  
**Number of Replicates (out of 10):** 3  
**Best Match Score:** 114.96  
**Best Match Posterior Error Probability:** 7.49E-05  
**Best Match Spectrum:**

|                    |           |                  |                           |
|--------------------|-----------|------------------|---------------------------|
| <b>Scan number</b> | 3141      | <b>Raw file</b>  | Prt-OGE-Batch2-Mock-Frac5 |
| <b>Method</b>      | ITMS; CID | <b>Genenames</b> | NFKBIE                    |

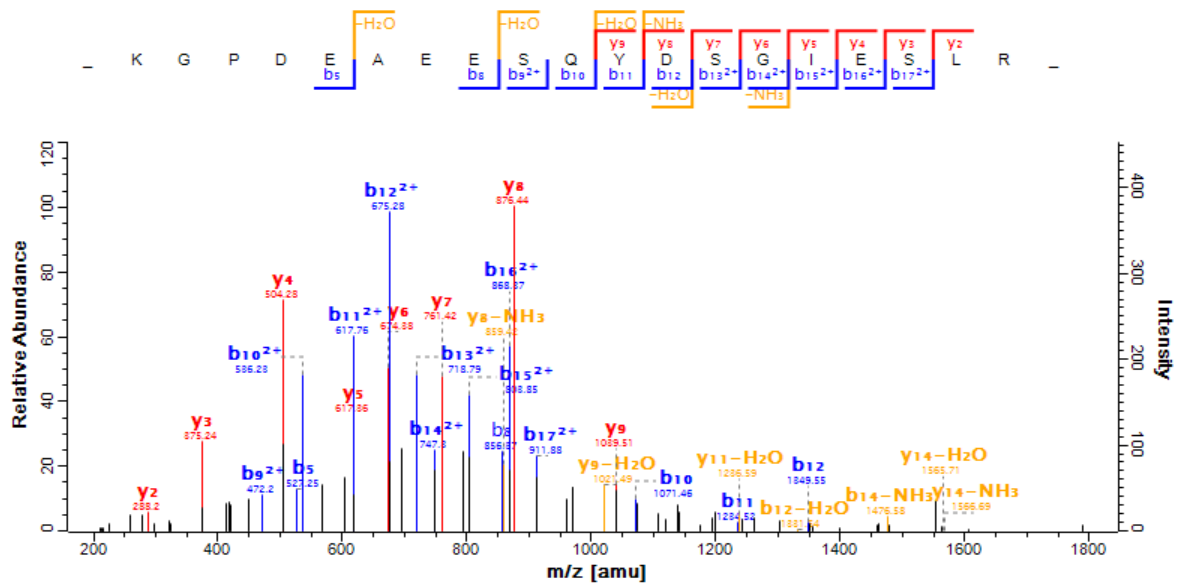

**Protein Group ID:** 966  
**Protein Accession Numbers:** Q13232; H3BPR2  
**Gene Names:** NME3  
**Peptide Sequence:** NLIHGSDSVESAR  
**Total Number of Spectra:** 1  
**Number of Replicates (out of 10):** 1  
**Best Match Score:** 105.17  
**Best Match Posterior Error Probability:** 0.00036267  
**Best Match Spectrum:**

**Scan number** 1309      **Raw file** 20100930-KD-Batch5-Prt-OGE-WT-Frac19  
**Method** ITMS; CID      **Genenames** NME3

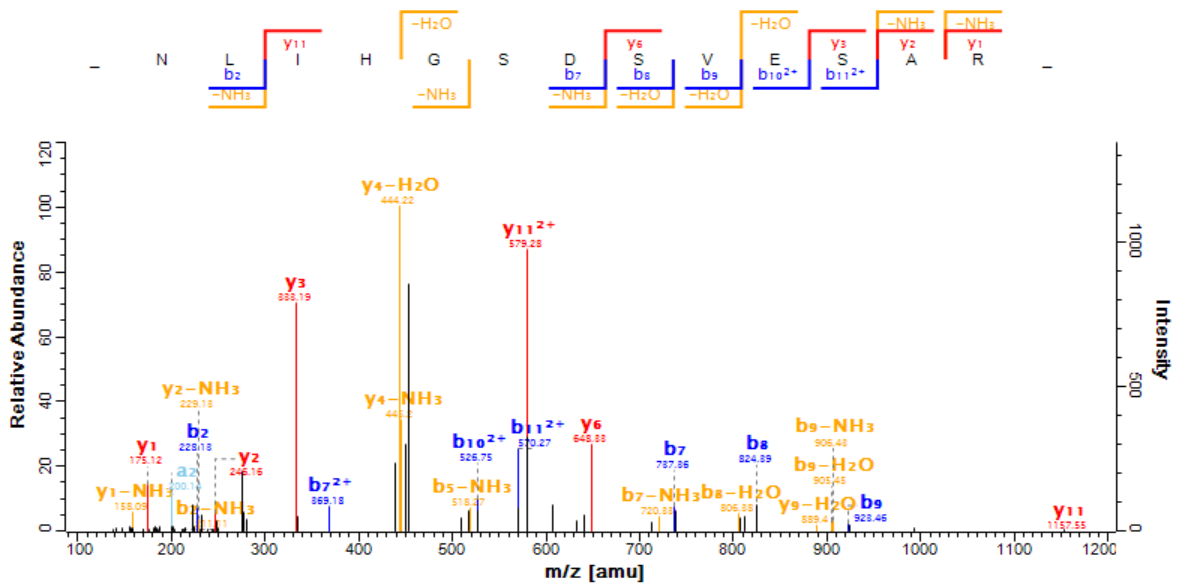

**Protein Group ID:** 970

**Protein Accession Numbers:** Q15554; H3BR06; J3KSZ6

**Gene Names:** TERF2

**Peptide Sequence:** KDENESSAPADGEGGSELQPK

**Total Number of Spectra:** 1

**Number of Replicates (out of 10):** 1

**Best Match Score:** 104.45

**Best Match Posterior Error Probability:** 1.51E-05

**Best Match Spectrum:**

|                    |           |                  |                                      |
|--------------------|-----------|------------------|--------------------------------------|
| <b>Scan number</b> | 1056      | <b>Raw file</b>  | 20100930-KD-Batch5-Prt-OGE-WT-Frac20 |
| <b>Method</b>      | ITMS; CID | <b>Genenames</b> | TERF2                                |

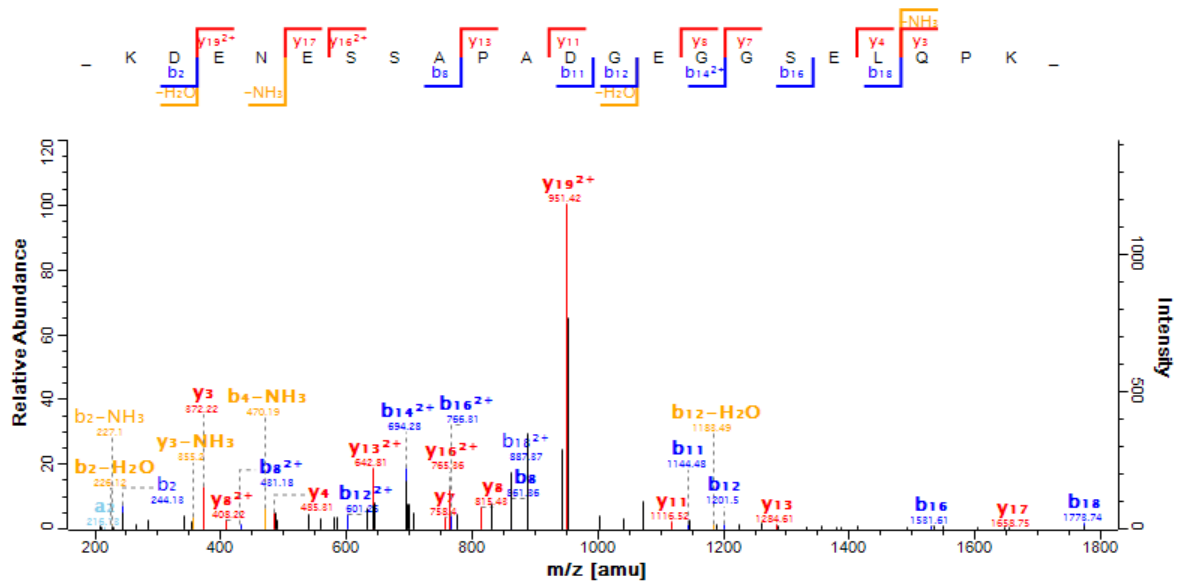

**Protein Group ID:** 971

**Protein Accession Numbers:** P55789; H3BRD2; H3BRW3

**Gene Names:** GFER

**Peptide Sequence:** SEMMDDLATDAR

**Total Number of Spectra:** 5

**Number of Replicates (out of 10):** 5

**Best Match Score:** 169.23

**Best Match Posterior Error Probability:** 3.10E-07

**Best Match Spectrum:**

**Scan number** 2651      **Raw file** 20100930-KD-Batch5-Prt-OGE-WT-Frac17  
**Method** ITMS; CID      **Genenames** GFER

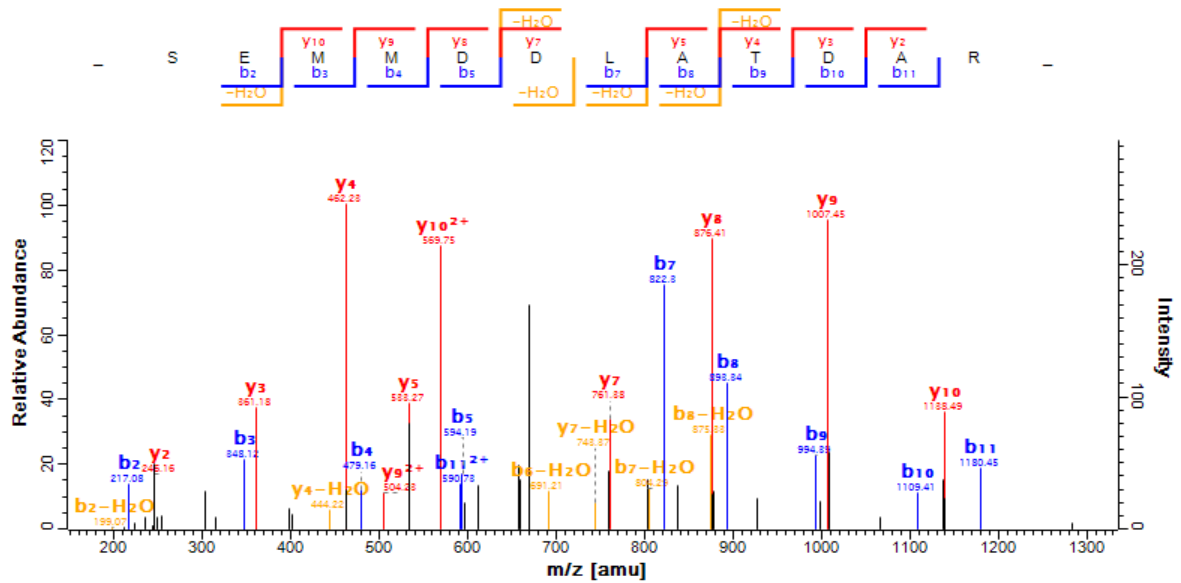

**Protein Group ID:** 973

**Protein Accession Numbers:** Q9NZD8; Q9NZD8-2; H3BRR0

**Gene Names:** SPG21

**Peptide Sequence:** DIPVTIMDVFDQSALSTEAK EEM YK

**Total Number of Spectra:** 1

**Number of Replicates (out of 10):** 1

**Best Match Score:** 68.49

**Best Match Posterior Error Probability:** 0.00062917

**Best Match Spectrum:**

**Scan number** 6524      **Raw file** OGE-Mock-Frac11  
**Method** ITMS; CID      **Genenames** SPG21

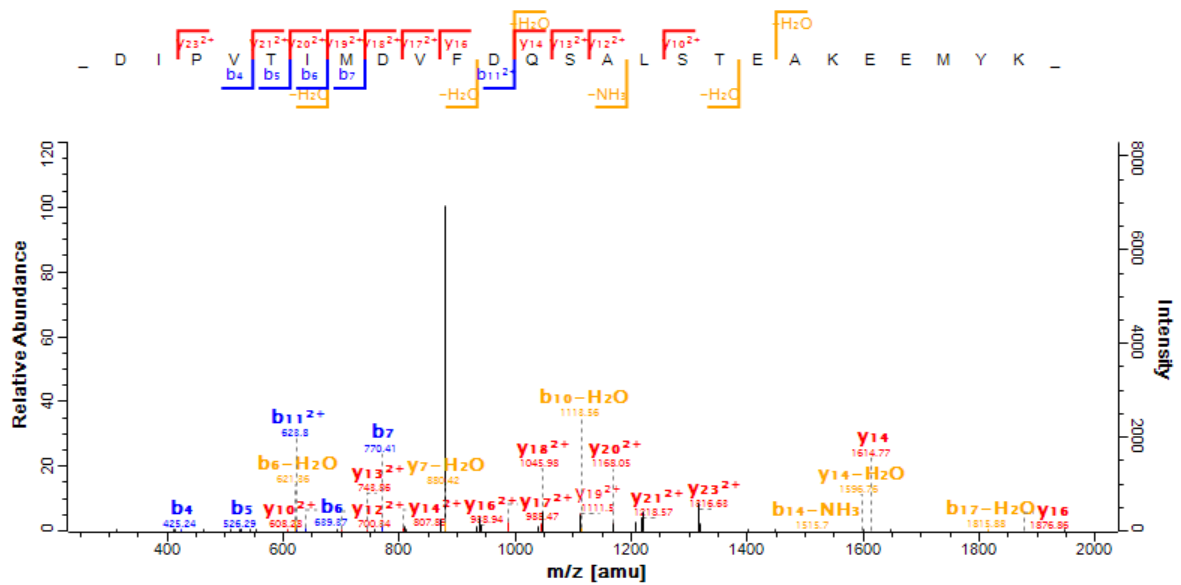

**Protein Group ID:** 976  
**Protein Accession Numbers:** P08047; H3BUU5  
**Gene Names:** SP1  
**Peptide Sequence:** SDQDHSMDEMTAVVK  
**Total Number of Spectra:** 20  
**Number of Replicates (out of 10):** 10  
**Best Match Score:** 144.18  
**Best Match Posterior Error Probability:** 1.53E-07  
**Best Match Spectrum:**

|                    |           |                  |                                     |
|--------------------|-----------|------------------|-------------------------------------|
| <b>Scan number</b> | 2901      | <b>Raw file</b>  | 20100930-KD-Batch5-Prt-OGE-WT-Frac2 |
| <b>Method</b>      | ITMS; CID | <b>Genenames</b> | SP1                                 |

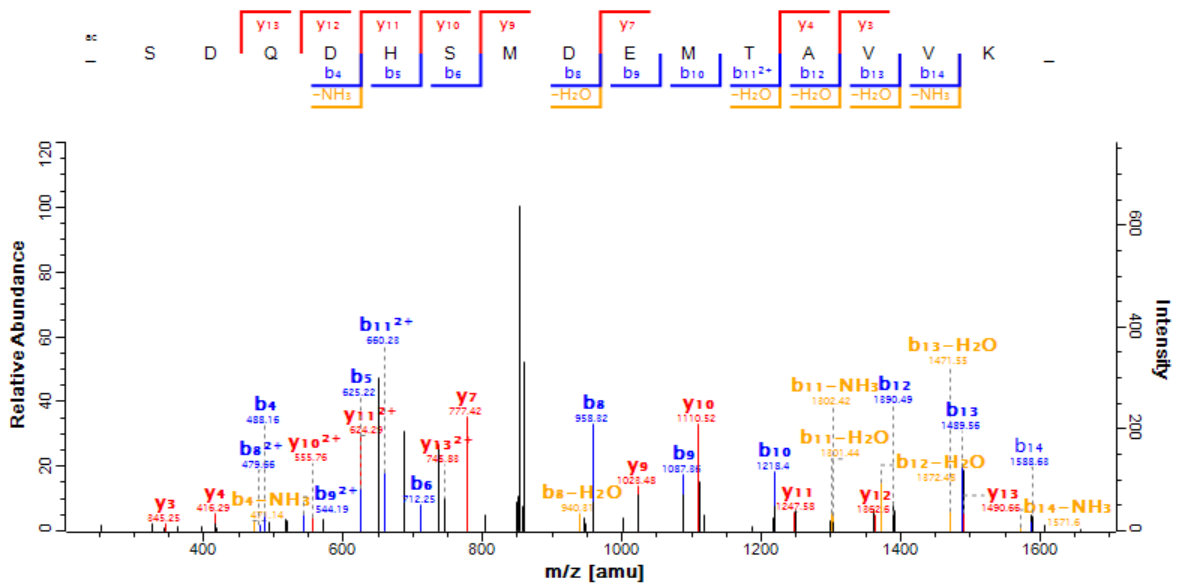



**Protein Group ID:** 977

**Protein Accession Numbers:** Q96S82; H3BUV9; H3BV23

**Gene Names:** UBL7

**Peptide Sequence:** SLSDWHLAVK

**Total Number of Spectra:** 1

**Number of Replicates (out of 10):** 1

**Best Match Score:** 105.2

**Best Match Posterior Error Probability:** 0.00039948

**Best Match Spectrum:**

**Scan number** 4391      **Raw file** 20100914-KD-Batch4-Prt-OGE-Mock-Frac5  
**Method** ITMS; CID      **Genenames** UBL7

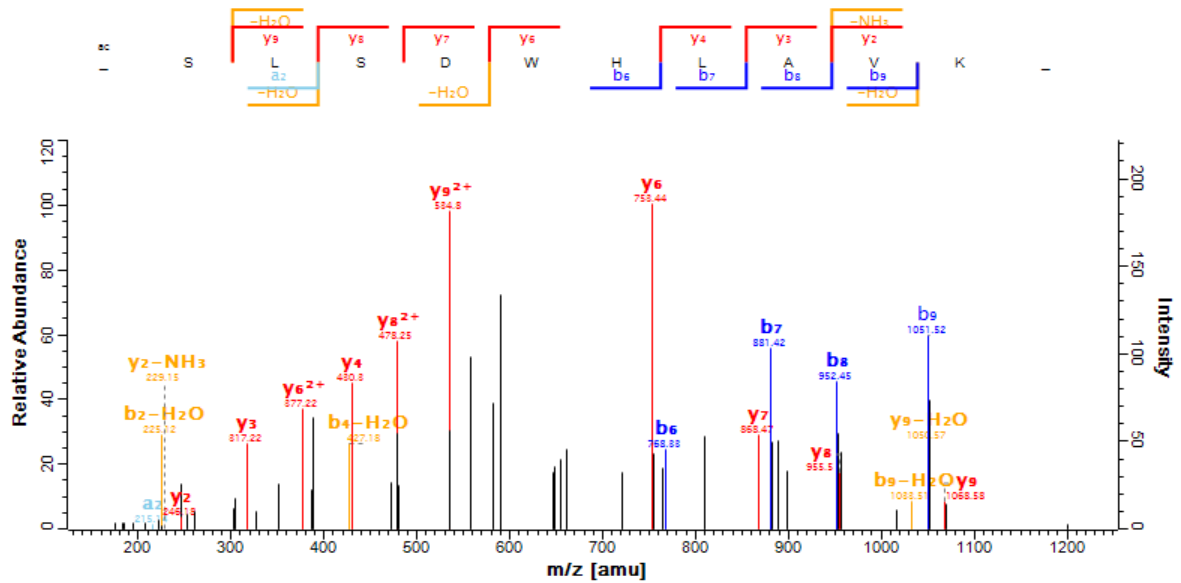

**Protein Group ID:** 980  
**Protein Accession Numbers:** P28676; H7BXD5  
**Gene Names:** GCA  
**Peptide Sequence:** DHLQQGSANFIYDDFLQGTMAI  
**Total Number of Spectra:** 1  
**Number of Replicates (out of 10):** 1  
**Best Match Score:** 77.53  
**Best Match Posterior Error Probability:** 0.0003329  
**Best Match Spectrum:**

**Scan number** 5884      **Raw file** Prt-OGE-Batch3-WT-Frac5  
**Method** ITMS; CID      **Genenames** GCA

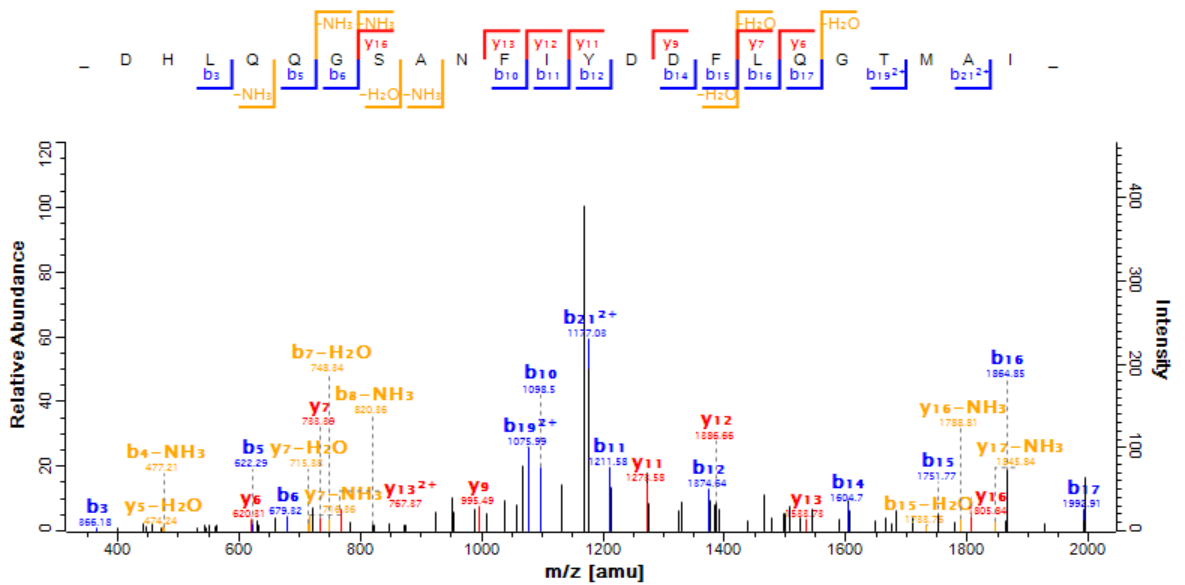

**Protein Group ID:** 982

**Protein Accession Numbers:** Q9UNF1; H7BXW3; Q9UNF1-2; Q5H907

**Gene Names:** MAGED2

**Peptide Sequence:** DSSSMMQTLTQNVETPK

**Total Number of Spectra:** 3

**Number of Replicates (out of 10):** 3

**Best Match Score:** 104.81

**Best Match Posterior Error Probability:** 4.14E-07

**Best Match Spectrum:**

**Scan number** 5792      **Raw file** OGEWT-Frac4  
**Method** ITMS; CID      **Genenames** MAGED2

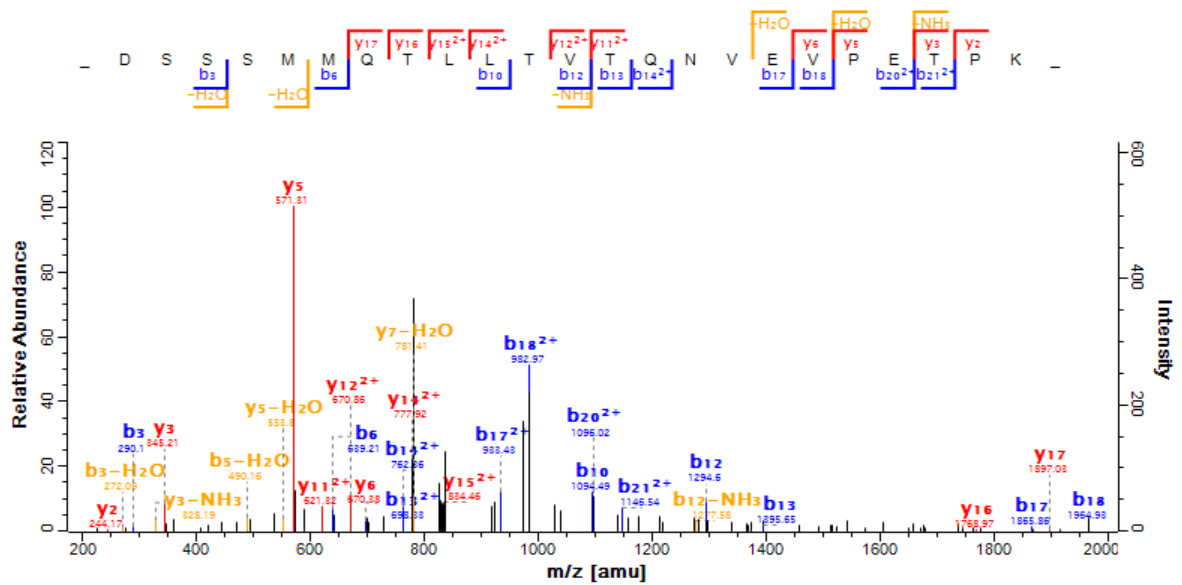

**Protein Group ID:** 986

**Protein Accession Numbers:** Q9NQY0; H7BYV6; Q9NQY0-2

**Gene Names:** BIN3

**Peptide Sequence:** LDYFQPSFESLR

**Total Number of Spectra:** 1

**Number of Replicates (out of 10):** 1

**Best Match Score:** 143.05

**Best Match Posterior Error Probability:** 1.55E-05

**Best Match Spectrum:**

**Scan number** 5051      **Raw file** Prt-OGE-Batch2-WT-Frac16  
**Method** ITMS; CID      **Genenames** BIN3

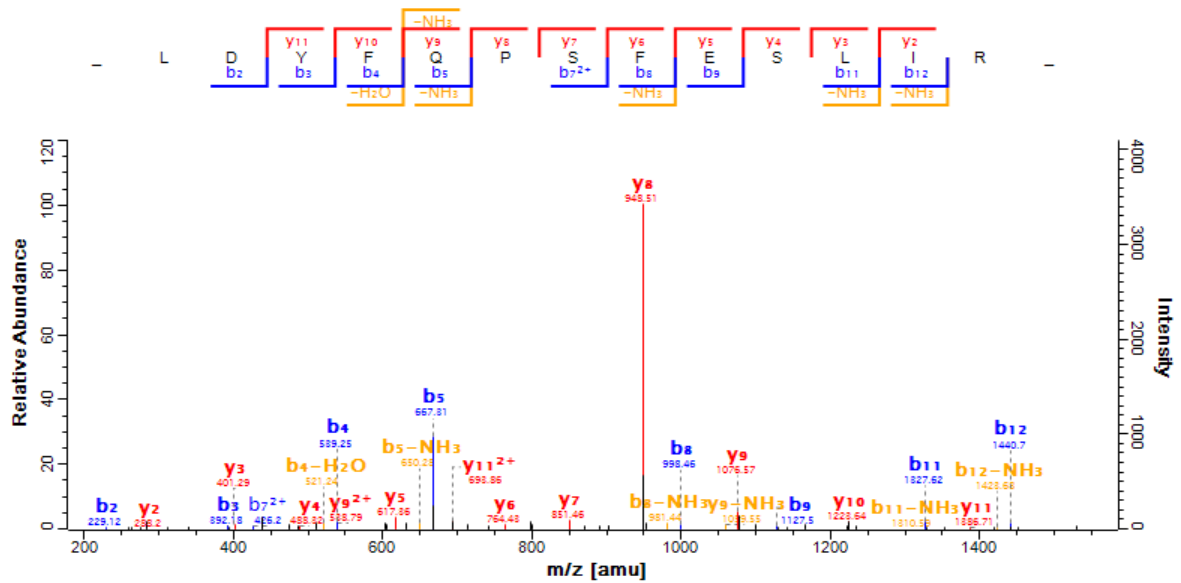

**Protein Group ID:** 988  
**Protein Accession Numbers:** Q9Y2X3; H7BZ72  
**Gene Names:** NOP58  
**Peptide Sequence:** LSELLPEEVEAEVK  
**Total Number of Spectra:** 1  
**Number of Replicates (out of 10):** 1  
**Best Match Score:** 104.17  
**Best Match Posterior Error Probability:** 0.00025651  
**Best Match Spectrum:**

|                    |           |                  |                          |
|--------------------|-----------|------------------|--------------------------|
| <b>Scan number</b> | 3410      | <b>Raw file</b>  | Prt-OGE-Batch3-WT-Frac20 |
| <b>Method</b>      | ITMS; CID | <b>Genenames</b> | NOP58                    |

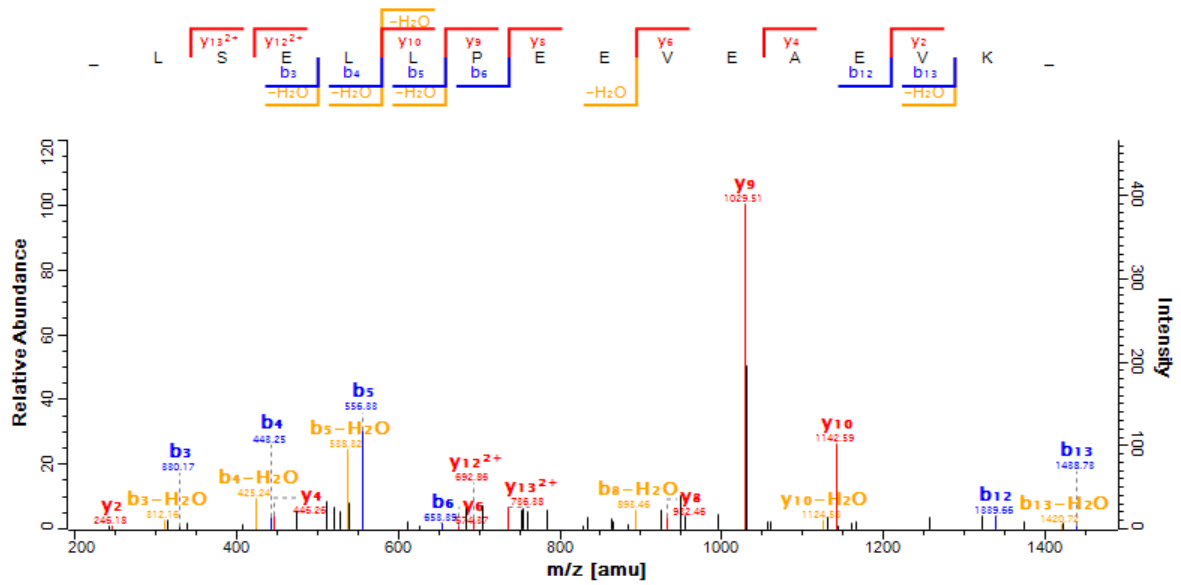

**Protein Group ID:** 989  
**Protein Accession Numbers:** H7BZF5  
**Gene Names:** C2orf80  
**Peptide Sequence:** GLDLLTSR  
**Total Number of Spectra:** 15  
**Number of Replicates (out of 10):** 8  
**Best Match Score:** 113.71  
**Best Match Posterior Error Probability:** 0.0015902  
**Best Match Spectrum:**

**Scan number** 1860      **Raw file** Prt-OGE-Batch3-WT-Frac12  
**Method** ITMS; CID      **Genenames** C2orf80

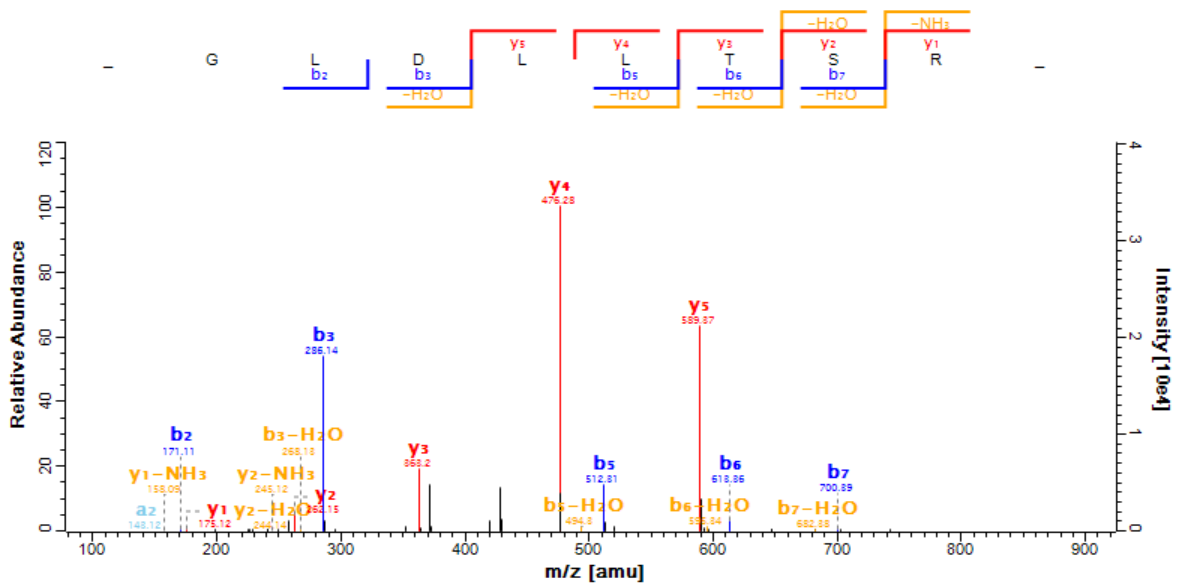

**Protein Group ID:** 991  
**Protein Accession Numbers:** Q96PE7; H7BZS7  
**Gene Names:** MCEE  
**Peptide Sequence:** PVIFLHPK  
**Total Number of Spectra:** 1  
**Number of Replicates (out of 10):** 1  
**Best Match Score:** 111.28  
**Best Match Posterior Error Probability:** 0.0015939  
**Best Match Spectrum:**

**Scan number** 2145      **Raw file** Prt-OGE-Batch2-WT-Frac17  
**Method** ITMS; CID      **Genenames** MCEE

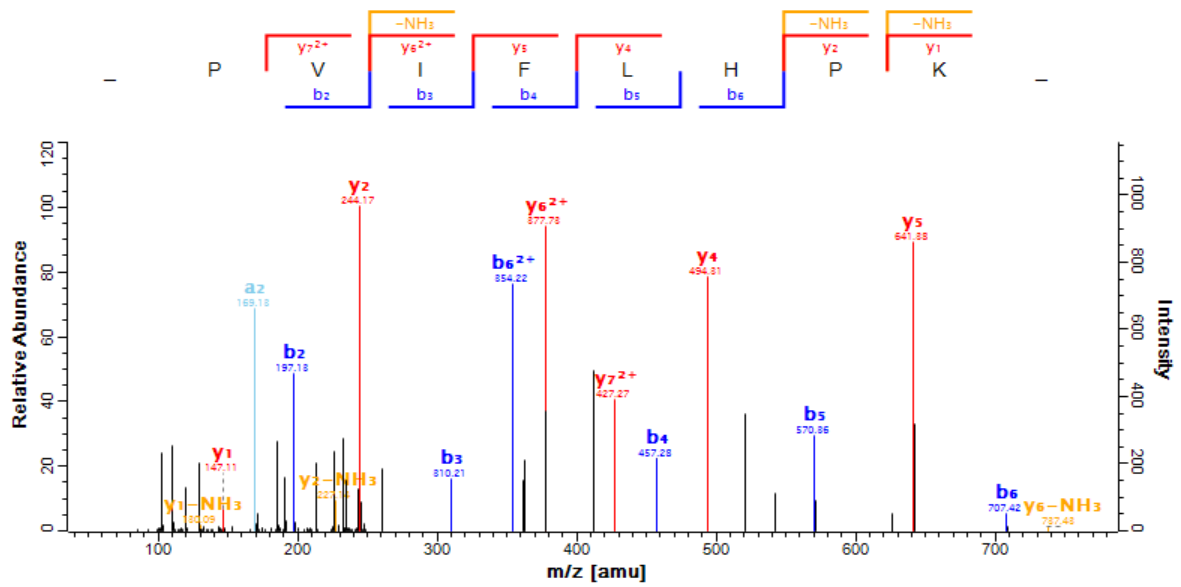

**Protein Group ID:** 993

**Protein Accession Numbers:** Q99996-6; Q99996; Q99996-2; Q99996-3; Q99996-5; Q99996-4; Q6PJH3; H7BZV6

**Gene Names:** AKAP9

**Peptide Sequence:** VTYGTEGLQQLQEFEEAIK

**Total Number of Spectra:** 1

**Number of Replicates (out of 10):** 1

**Best Match Score:** 101.53

**Best Match Posterior Error Probability:** 0.00010224

**Best Match Spectrum:**

Scan number 5755 Raw file 20100930-KD-Batch5-Prt-OGE-WT-Frac6  
Method ITMS: CID Genenames AKAP9

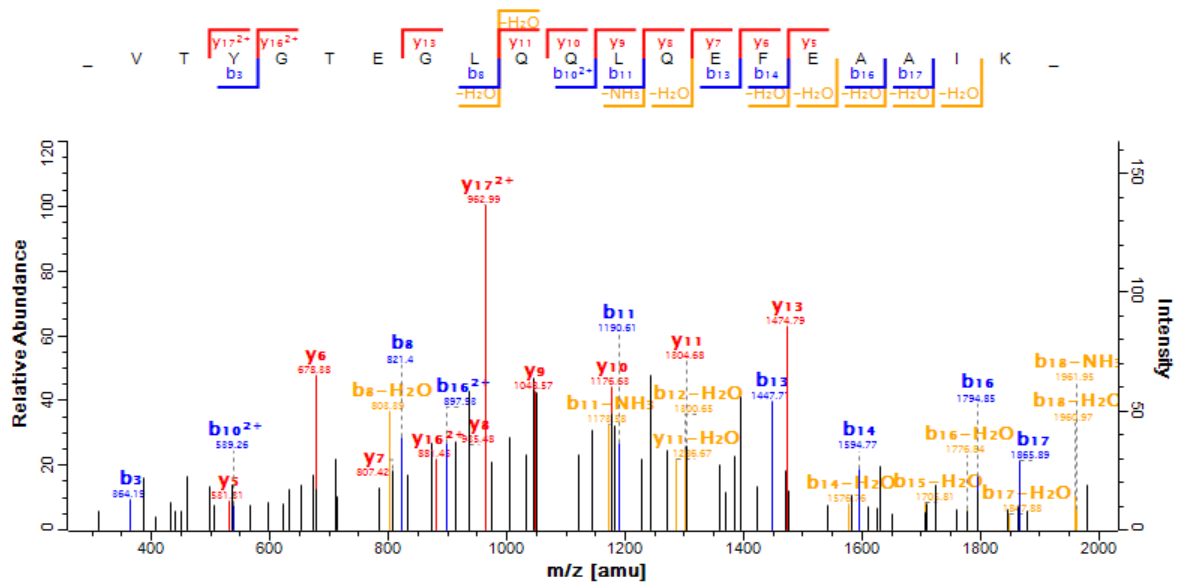



**Protein Group ID:** 996

**Protein Accession Numbers:** P61019; P61019-2; H7C125

**Gene Names:** RAB2A

**Peptide Sequence:** TASNVEEAFINTAK

**Total Number of Spectra:** 1

**Number of Replicates (out of 10):** 1

**Best Match Score:** 106.3

**Best Match Posterior Error Probability:** 0.00021087

**Best Match Spectrum:**

|                    |           |                  |                            |
|--------------------|-----------|------------------|----------------------------|
| <b>Scan number</b> | 3998      | <b>Raw file</b>  | Prt-OGE-Batch3-Mock-Frac13 |
| <b>Method</b>      | ITMS; CID | <b>Genenames</b> | RAB2A                      |

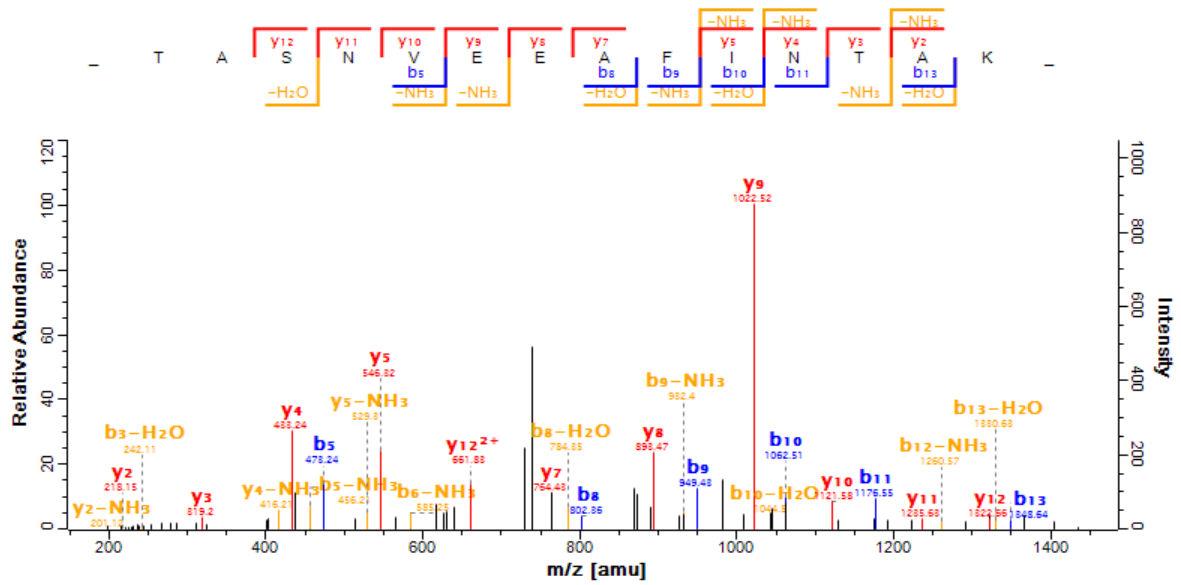

**Protein Group ID:** 998  
**Protein Accession Numbers:** Q96HY7; H7C149  
**Gene Names:** DHTKD1  
**Peptide Sequence:** LDWATAEALALGSLLAQGFNVR  
**Total Number of Spectra:** 2  
**Number of Replicates (out of 10):** 2  
**Best Match Score:** 100.45  
**Best Match Posterior Error Probability:** 5.92E-06  
**Best Match Spectrum:**

**Scan number** 8457      **Raw file** 20100917-KD-Batch5-Prt-OGE-Mock-Frac15  
**Method** ITMS; CID      **Genenames** DHTKD1

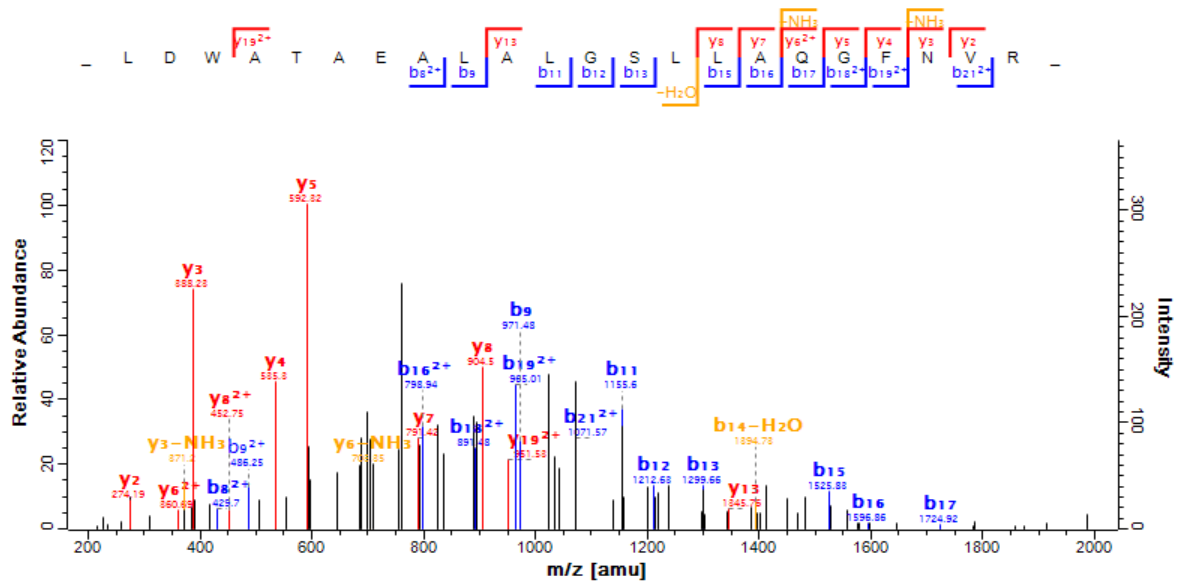

**Protein Group ID:** 1000  
**Protein Accession Numbers:** Q9NWM8; H7C1Z9  
**Gene Names:** FKBP14  
**Peptide Sequence:** HNNGQPIWFTLGILEALK  
**Total Number of Spectra:** 1  
**Number of Replicates (out of 10):** 1  
**Best Match Score:** 122.75  
**Best Match Posterior Error Probability:** 0.00081448  
**Best Match Spectrum:**

**Scan number** 7216      **Raw file** OGE-WT-Frac10  
**Method** ITMS; CID      **Genenames** FKBP14

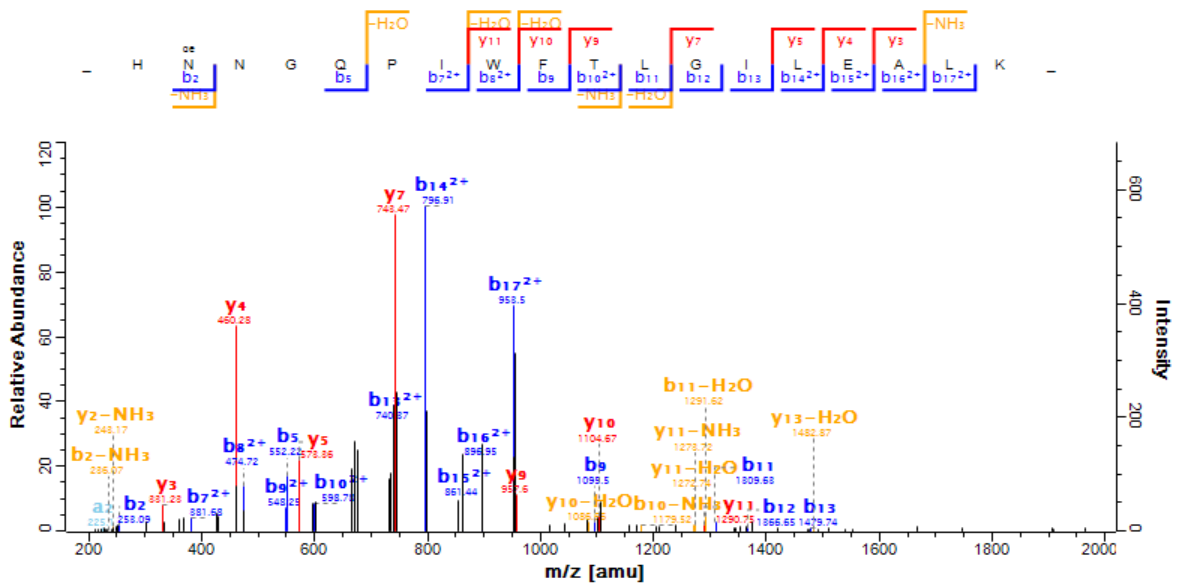

**Protein Group ID:** 1001

**Protein Accession Numbers:** Q58EX2-4; Q58EX2; Q58EX2-3; Q58EX2-2; H7C2P2

**Gene Names:** SDK2

**Peptide Sequence:** GWGEAAEALVVVTTEK

**Total Number of Spectra:** 1

**Number of Replicates (out of 10):** 1

**Best Match Score:** 97.463

**Best Match Posterior Error Probability:** 0.00014213

**Best Match Spectrum:**

|                    |           |                  |                                     |
|--------------------|-----------|------------------|-------------------------------------|
| <b>Scan number</b> | 4151      | <b>Raw file</b>  | 20100930-KD-Batch5-Prt-OGE-WT-Frac7 |
| <b>Method</b>      | ITMS; CID | <b>Genenames</b> | SDK2                                |

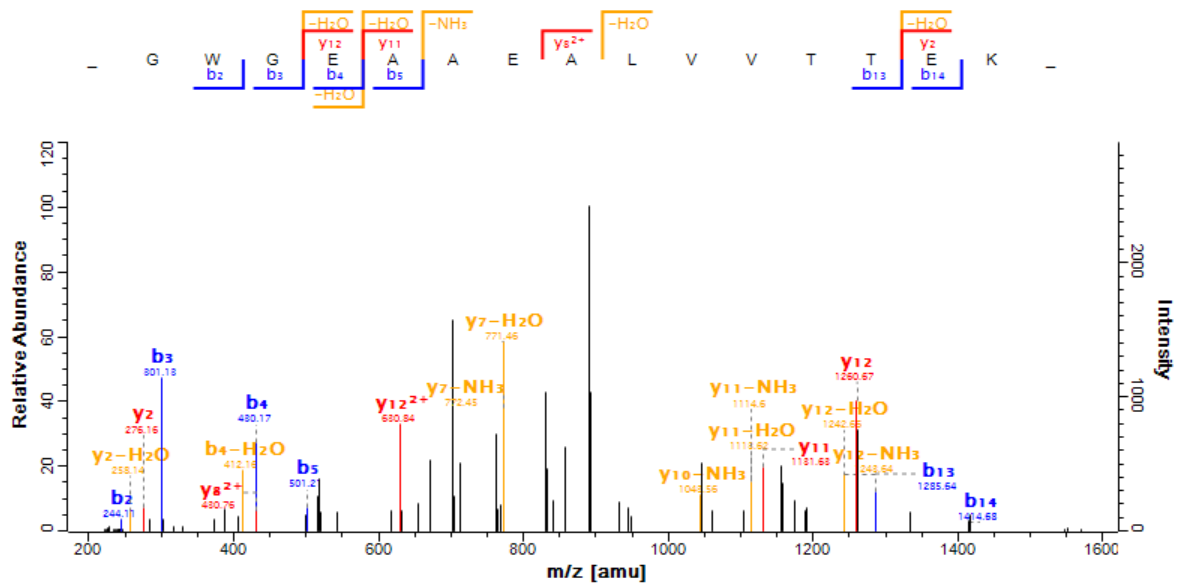

**Protein Group ID:** 1003  
**Protein Accession Numbers:** Q96B36; H9KV91  
**Gene Names:** AKT1S1  
**Peptide Sequence:** ASGRPEELWEAVVGAAR  
**Total Number of Spectra:** 10  
**Number of Replicates (out of 10):** 5  
**Best Match Score:** 106.6  
**Best Match Posterior Error Probability:** 0.00045846  
**Best Match Spectrum:**

**Scan number** 6094      **Raw file** 20100914-KD-Batch4-Prt-OGE-Mock-Frac15  
**Method** ITMS; CID      **Genenames** AKT1S1

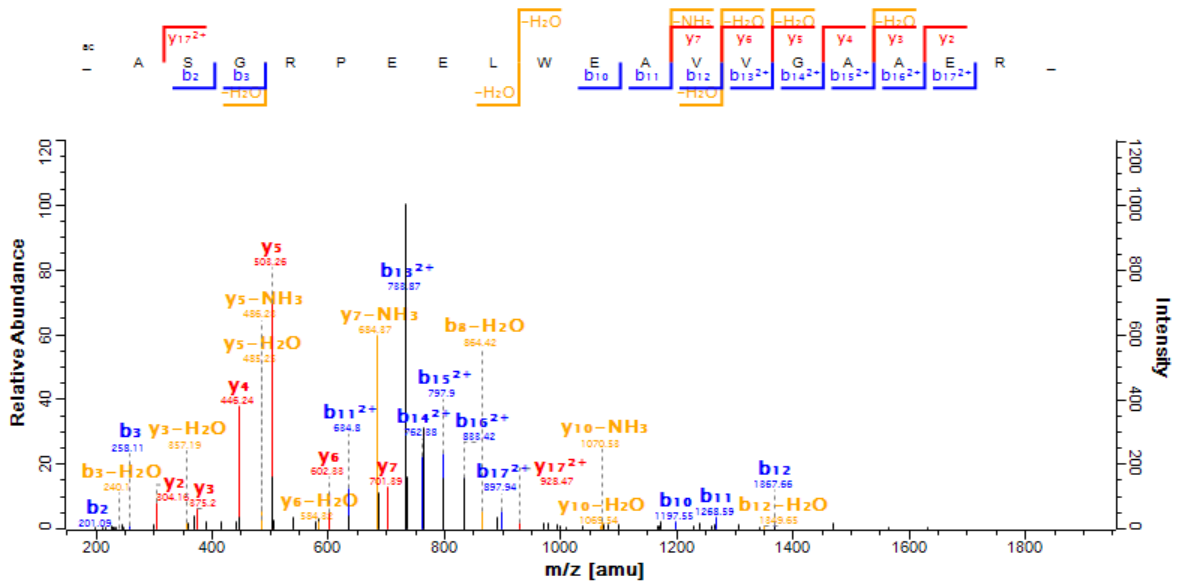

**Protein Group ID:** 1008

**Protein Accession Numbers:** I3L416; I3L3T0; I3L0X9; I3L1U7; Q9Y3D7

**Gene Names:** PAM16

**Peptide Sequence:** SAAASNLSGLSLQEAQQILNVSK

**Total Number of Spectra:** 4

**Number of Replicates (out of 10):** 3

**Best Match Score:** 179.87

**Best Match Posterior Error Probability:** 1.77E-36

**Best Match Spectrum:**

**Scan number** 5976      **Raw file** 20100917-KD-Batch5-Prt-OGE-Mock-Frac22  
**Method** ITMS; CID      **Genenames** PAM16

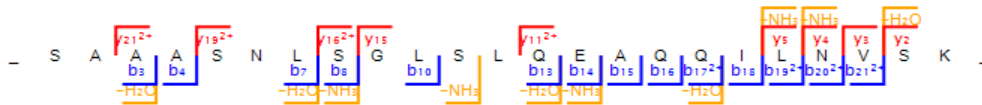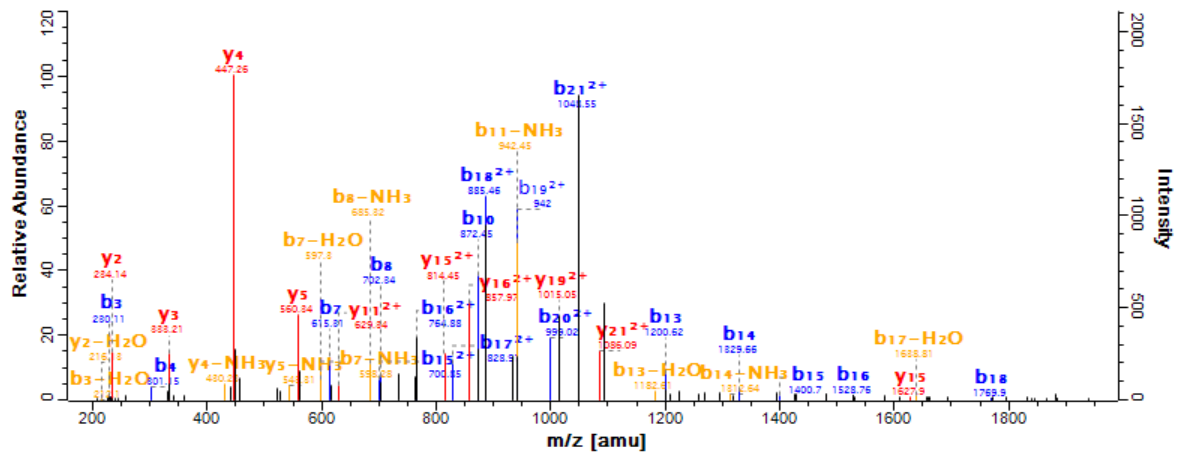

**Protein Group ID:** 1021

**Protein Accession Numbers:** J3KN82; Q96GX9; Q96GX9-3

**Gene Names:** APIP

**Peptide Sequence:** YDDMLVVPIIENTPEEK

**Total Number of Spectra:** 1

**Number of Replicates (out of 10):** 1

**Best Match Score:** 77.468

**Best Match Posterior Error Probability:** 0.0013854

**Best Match Spectrum:**

**Scan number** 6320      **Raw file** Prt-OGE-Batch2-Mock-Frac16  
**Method** ITMS; CID      **Genenames** APIP

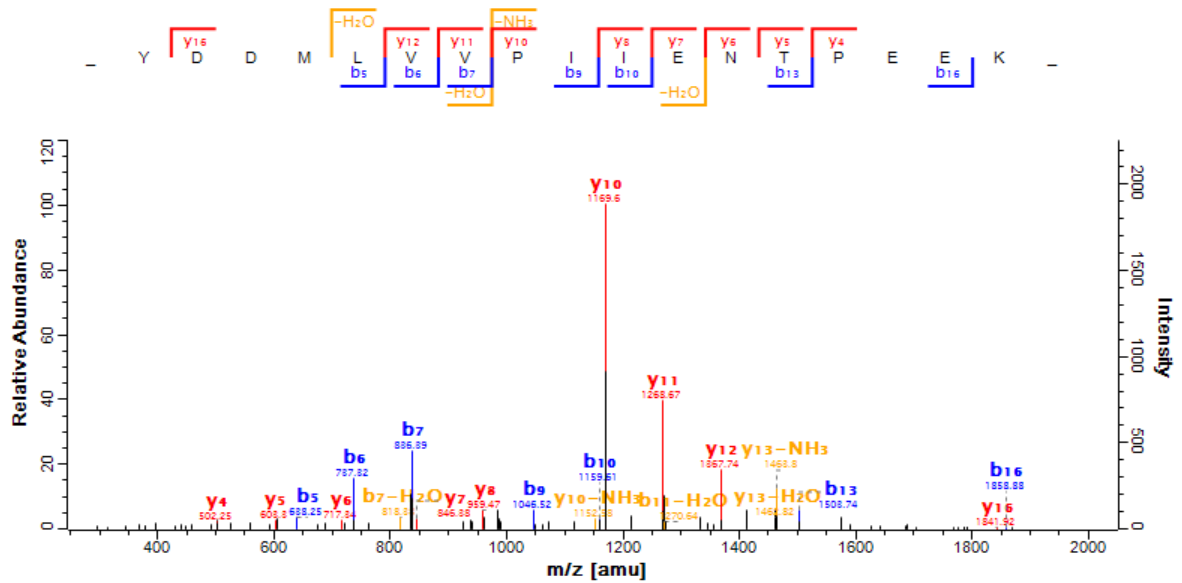

**Protein Group ID:** 1027  
**Protein Accession Numbers:** J3KNN5; Q9UJV9  
**Gene Names:** DDX41  
**Peptide Sequence:** AGAASLDVIQEVEYVKEEK  
**Total Number of Spectra:** 1  
**Number of Replicates (out of 10):** 1  
**Best Match Score:** 95.236  
**Best Match Posterior Error Probability:** 0.00034531  
**Best Match Spectrum:**

**Scan number** 4577      **Raw file** OGE-Mock-Frac14  
**Method** ITMS; CID      **Genenames** DDX41

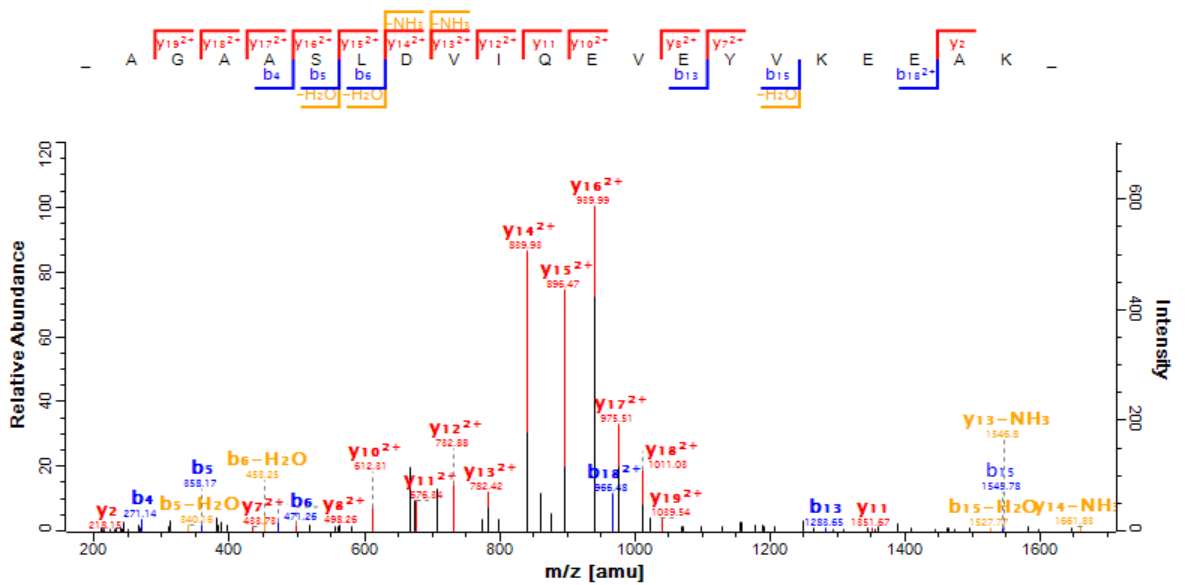



**Protein Group ID:** 1047

**Protein Accession Numbers:** J3KQ73; Q14318-2; Q14318

**Gene Names:** FKBP8

**Peptide Sequence:** EFLAAMEPEPAPAPAEWLDILGNGLLR

**Total Number of Spectra:** 1

**Number of Replicates (out of 10):** 1

**Best Match Score:** 104.81

**Best Match Posterior Error Probability:** 9.10E-15

**Best Match Spectrum:**

|                    |           |                  |                |
|--------------------|-----------|------------------|----------------|
| <b>Scan number</b> | 7828      | <b>Raw file</b>  | OGE-Mock-Frac9 |
| <b>Method</b>      | ITMS; CID | <b>Genenames</b> | FKBP8          |

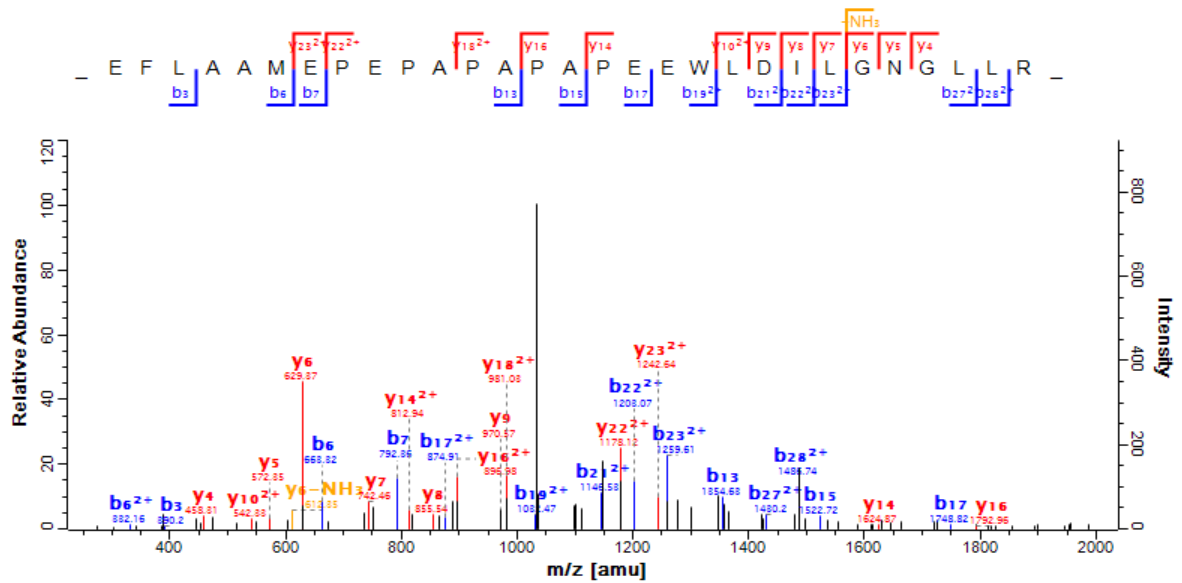

**Protein Group ID:** 1052

**Protein Accession Numbers:** J3KQG9; Q9H3H3-3; Q9H3H3-2; Q9H3H3

**Gene Names:** C11orf68

**Peptide Sequence:** LGVLEADSAIR

**Total Number of Spectra:** 2

**Number of Replicates (out of 10):** 2

**Best Match Score:** 113.38

**Best Match Posterior Error Probability:** 0.00013328

**Best Match Spectrum:**

|                    |           |                  |                                        |
|--------------------|-----------|------------------|----------------------------------------|
| <b>Scan number</b> | 3403      | <b>Raw file</b>  | 20100914-KD-Batch4-Prt-OGE-Mock-Frac13 |
| <b>Method</b>      | ITMS; CID | <b>Genenames</b> | C11orf68                               |

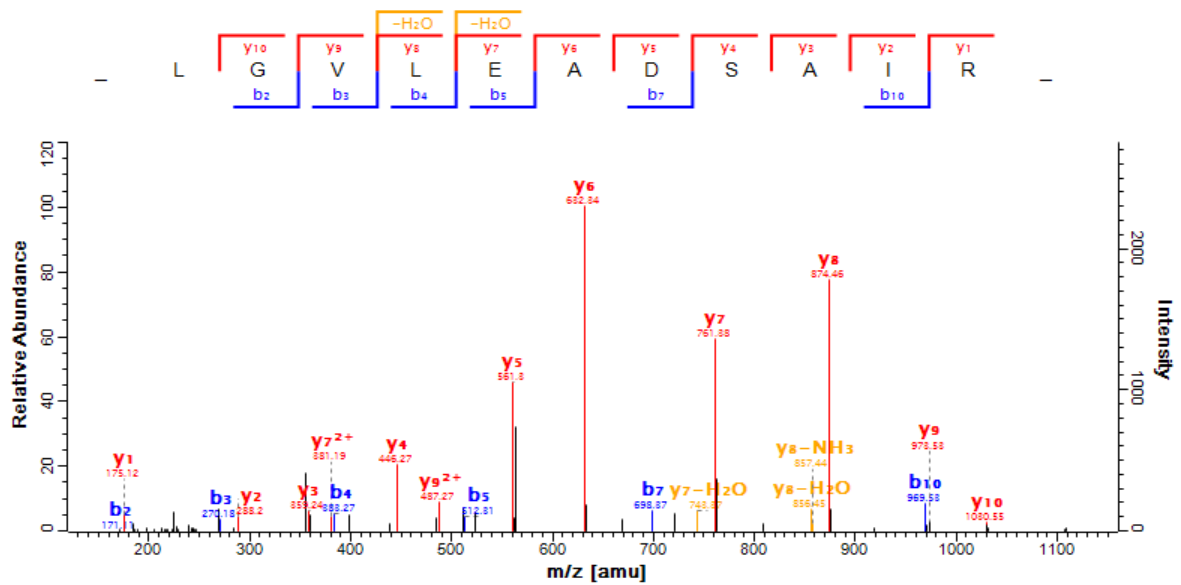

**Protein Group ID:** 1057  
**Protein Accession Numbers:** J3KR35; Q8WUD4  
**Gene Names:** CCDC12  
**Peptide Sequence:** LKGQEDSLASAVDAATEQK  
**Total Number of Spectra:** 3  
**Number of Replicates (out of 10):** 3  
**Best Match Score:** 106.93  
**Best Match Posterior Error Probability:** 0.00017751  
**Best Match Spectrum:**

**Scan number** 3728      **Raw file** Prt-OGE-Batch3-Mock-Frac12  
**Method** ITMS; CID      **Genenames** CCDC12

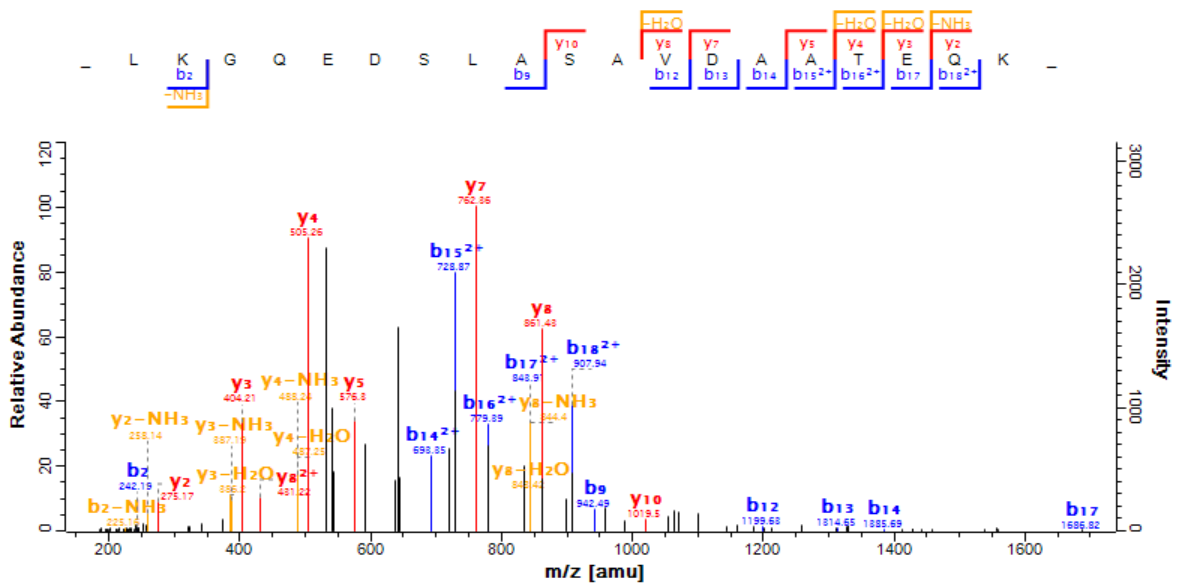

**Protein Group ID:** 1060

**Protein Accession Numbers:** Q9BT23; J3QQM5; J3KRR0

**Gene Names:** LIMD2

**Peptide Sequence:** MFQAAGAAQATPSHDAK

**Total Number of Spectra:** 1

**Number of Replicates (out of 10):** 1

**Best Match Score:** 128.59

**Best Match Posterior Error Probability:** 3.84E-05

**Best Match Spectrum:**

**Scan number** 2863      **Raw file** 20100930-KD-Batch5-Prt-OGE-WT-Frac22  
**Method** ITMS; CID      **Genenames** LIMD2

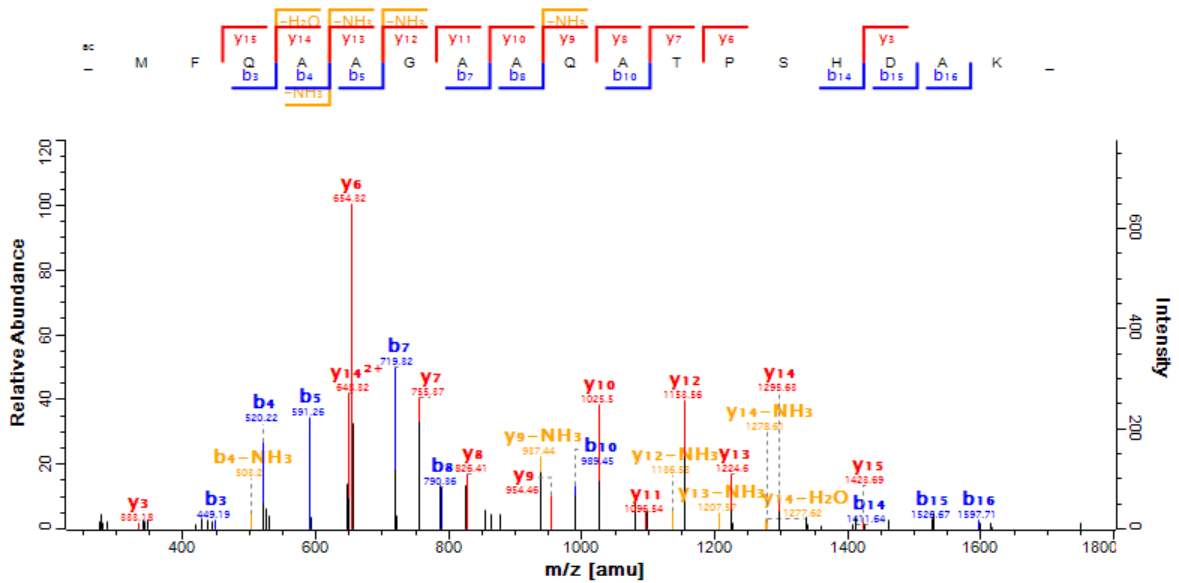

**Protein Group ID:** 1062

**Protein Accession Numbers:** P0CB44; Q8WVK7; J3KSP0; J3KRZ0; J3QS74

**Gene Names:** SKA2L;SKA2

**Peptide Sequence:** MEAEVDKLELMFQK

**Total Number of Spectra:** 1

**Number of Replicates (out of 10):** 1

**Best Match Score:** 115.1

**Best Match Posterior Error Probability:** 0.00035553

**Best Match Spectrum:**

|                    |           |                  |                            |
|--------------------|-----------|------------------|----------------------------|
| <b>Scan number</b> | 7430      | <b>Raw file</b>  | Prt-OGE-Batch2-Mock-Frac14 |
| <b>Method</b>      | ITMS; CID | <b>Genenames</b> | SKA2L;SKA2                 |

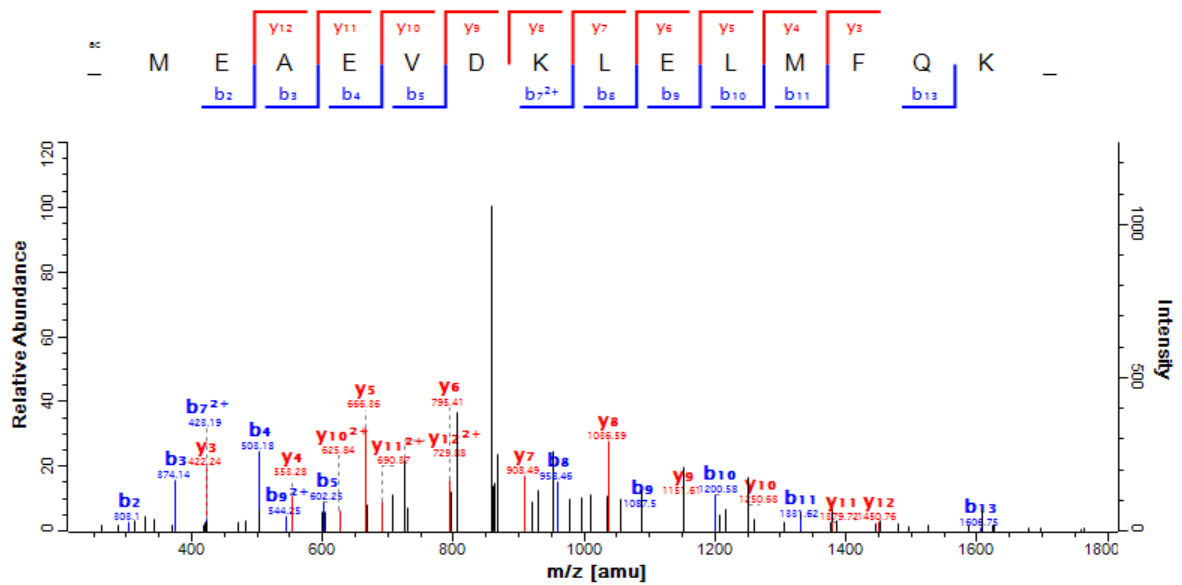

**Protein Group ID:** 1082

**Protein Accession Numbers:** J3QRS3; P19105; J3KTJ1

**Gene Names:** MYL12A

**Peptide Sequence:** NPTDEYLDAMMNEAPGPINFTMFLTMFGEK

**Total Number of Spectra:** 1

**Number of Replicates (out of 10):** 1

**Best Match Score:** 80.439

**Best Match Posterior Error Probability:** 2.05E-07

**Best Match Spectrum:**

**Scan number** 7202      **Raw file** OGEWT-Frac4  
**Method** ITMS; CID      **Genenames** MYL12A

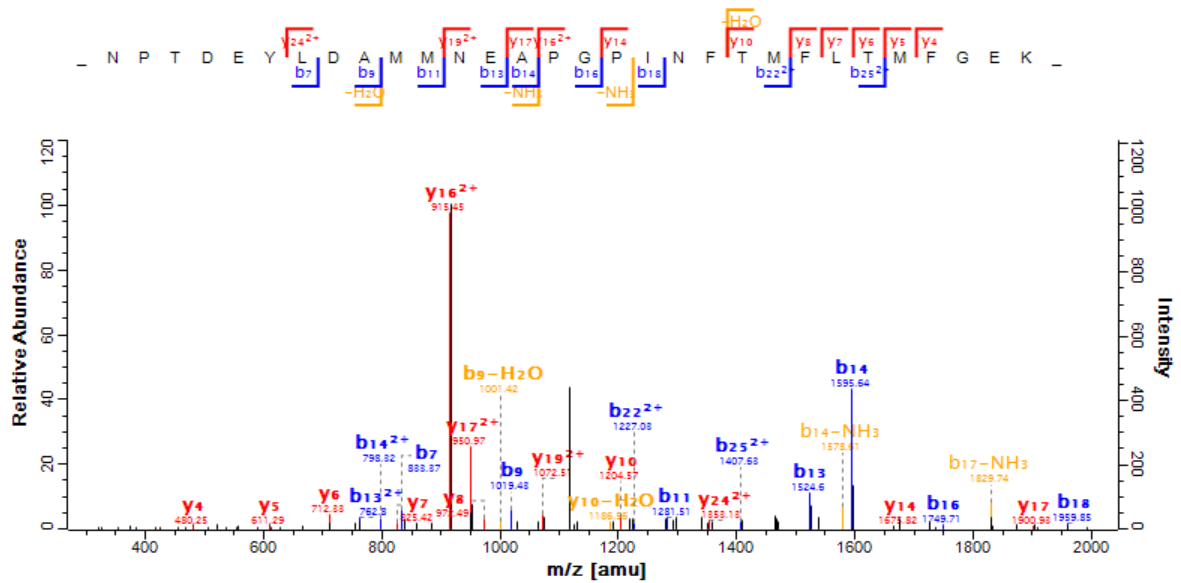

**Protein Group ID:** 1090  
**Protein Accession Numbers:** J9JIC5; Q9HAS0  
**Gene Names:** C17orf75  
**Peptide Sequence:** NVIAVLEEFMK  
**Total Number of Spectra:** 22  
**Number of Replicates (out of 10):** 10  
**Best Match Score:** 178.71  
**Best Match Posterior Error Probability:** 8.12E-11  
**Best Match Spectrum:**

**Scan number** 6630      **Raw file** OGE-WT-Frac6  
**Method** ITMS; CID      **Genenames** C17orf75

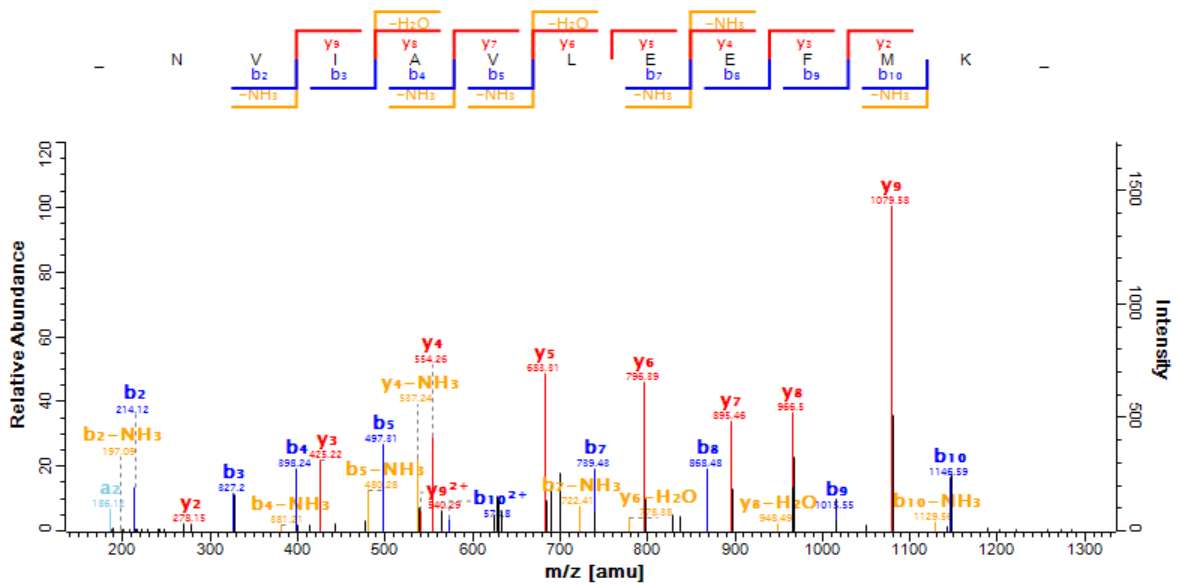

**Protein Group ID:** 1094

**Protein Accession Numbers:** Q8IYT4; Q8IYT4-2; K7EIJ8; K7EM02

**Gene Names:** KATNAL2

**Peptide Sequence:** GLLLYGPPGTGK

**Total Number of Spectra:** 72

**Number of Replicates (out of 10):** 10

**Best Match Score:** 186.87

**Best Match Posterior Error Probability:** 1.19E-15

**Best Match Spectrum:**

**Scan number** 3726      **Raw file** OGE-WT-Frac7  
**Method** ITMS; CID      **Genenames** KATNAL2

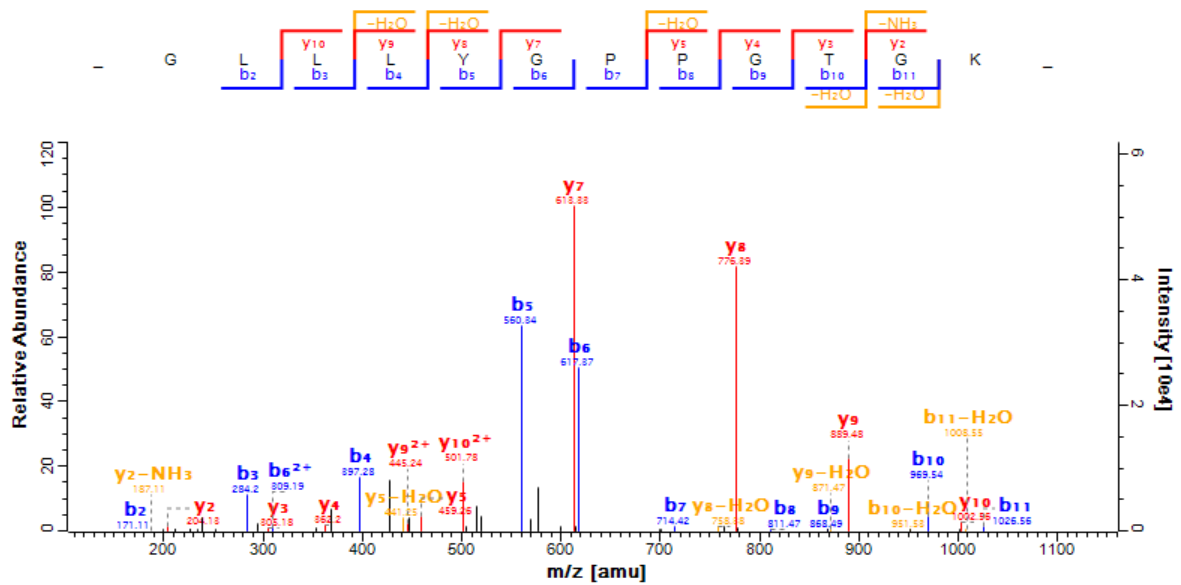



**Protein Group ID:** 1097  
**Protein Accession Numbers:** Q13485; K7EIU8  
**Gene Names:** SMAD4  
**Peptide Sequence:** ALQLLDEVLHTMPIADPQLD  
**Total Number of Spectra:** 11  
**Number of Replicates (out of 10):** 7  
**Best Match Score:** 81.665  
**Best Match Posterior Error Probability:** 0.00029407  
**Best Match Spectrum:**

**Scan number** 7681      **Raw file** 20100914-KD-Batch4-Prt-OGE-Mock-Frac16  
**Method** ITMS; CID      **Genenames** SMAD4

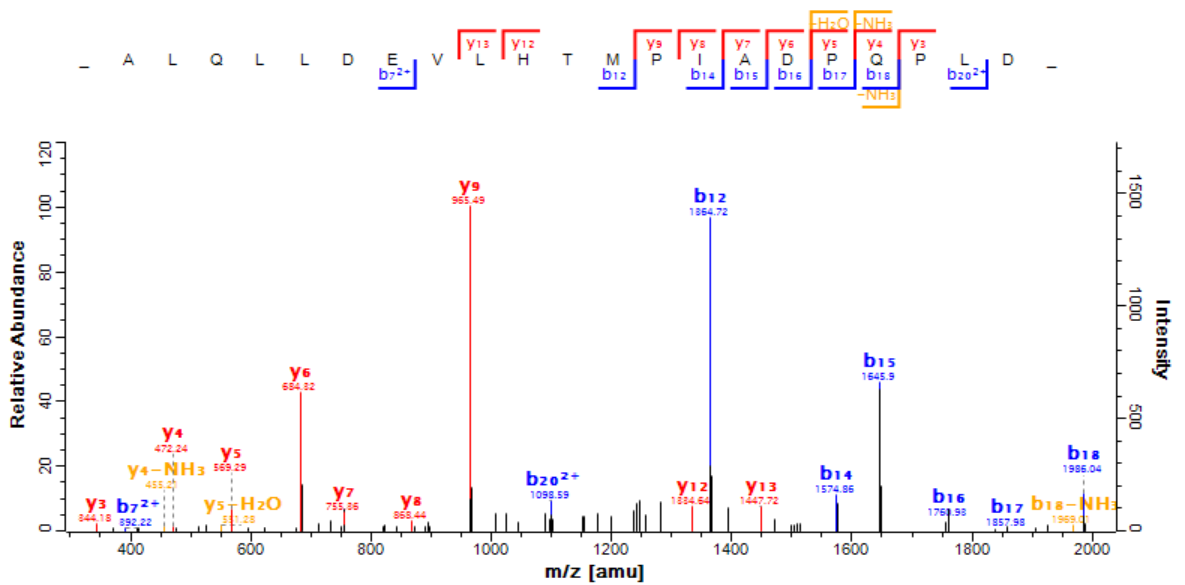

**Protein Group ID:** 1098

**Protein Accession Numbers:** Q96ED9; Q96ED9-2; K7ENU5; K7EJ48; K7EJ65; K7EMR5; K7EMG7; K7EJA7; K7EQA2

**Gene Names:** HOOK2

**Peptide Sequence:** IMTLEESVQHVVMEAIQELMTK

**Total Number of Spectra:** 3

**Number of Replicates (out of 10):** 3

**Best Match Score:** 117.65

**Best Match Posterior Error Probability:** 2.55E-08

**Best Match Spectrum:**

|                    |           |                  |                                       |
|--------------------|-----------|------------------|---------------------------------------|
| <b>Scan number</b> | 8973      | <b>Raw file</b>  | 20100917-KD-Batch5-Prt-OGE-Mock-Frac9 |
| <b>Method</b>      | ITMS: CID | <b>Genenames</b> | HOOK2                                 |

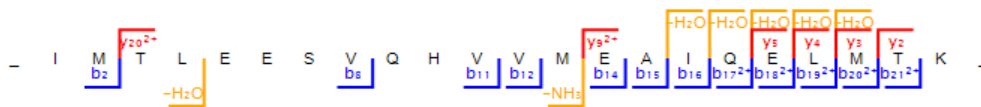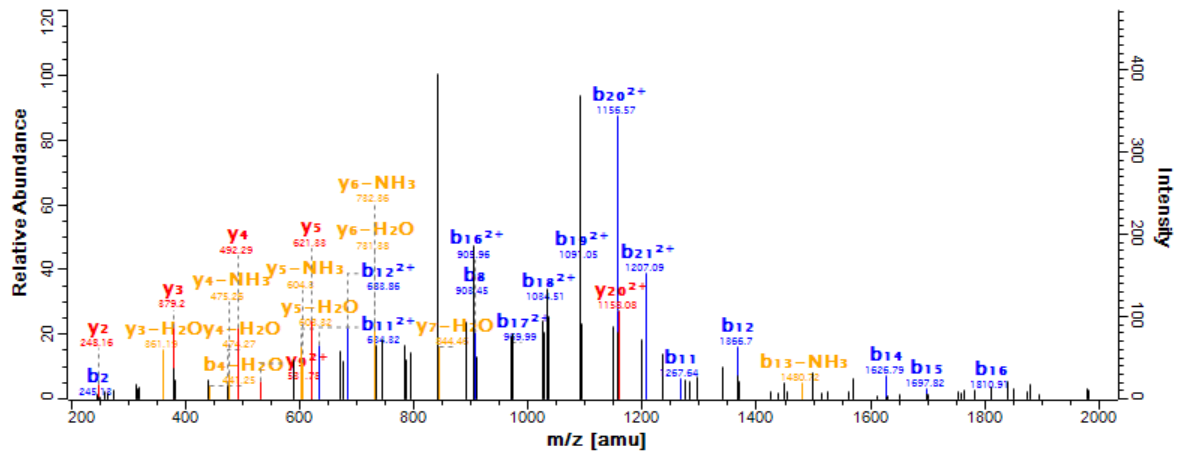

**Protein Group ID:** 1102

**Protein Accession Numbers:** P84243; K7EK07

**Gene Names:** H3F3A

**Peptide Sequence:** FQSAAIGALQEASEAYLVGLFEDTNLCAIHAK

**Total Number of Spectra:** 18

**Number of Replicates (out of 10):** 4

**Best Match Score:** 130.83

**Best Match Posterior Error Probability:** 1.15E-42

**Best Match Spectrum:**

**Scan number** 8309      **Raw file** 20100930-KD-Batch5-Prt-OGE-WT-Frac14  
**Method** ITMS; CID      **Genenames** H3F3A

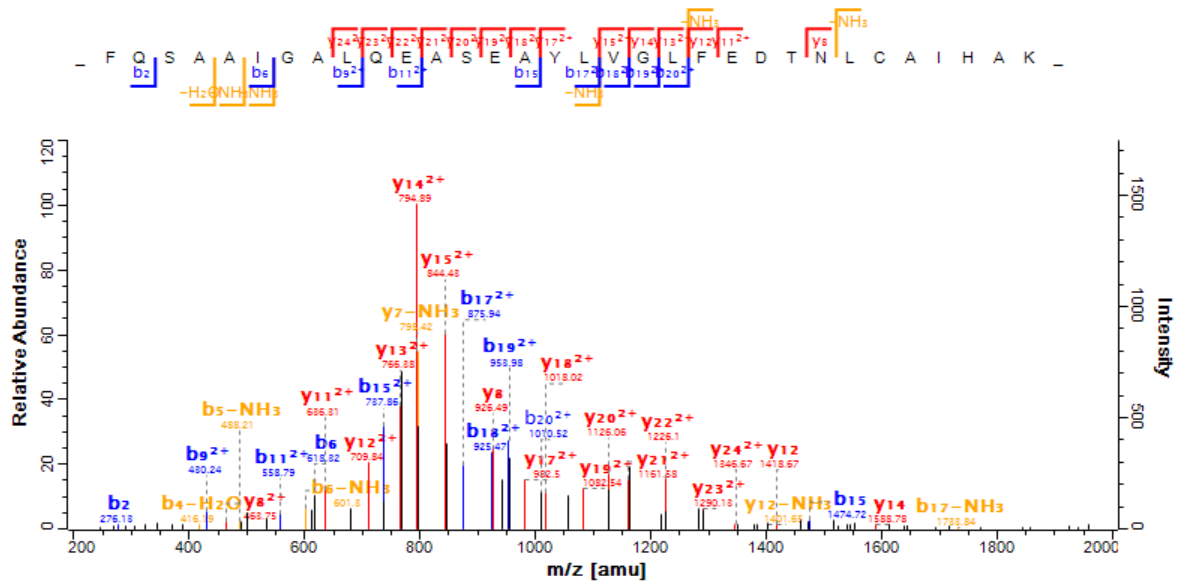

**Protein Group ID:** 1104

**Protein Accession Numbers:** Q96CS2; K7EKH4; Q96CS2-2

**Gene Names:** HAUS1

**Peptide Sequence:** DTSLASFIPAVNDLTSDLFR

**Total Number of Spectra:** 2

**Number of Replicates (out of 10):** 2

**Best Match Score:** 81.157

**Best Match Posterior Error Probability:** 0.00084689

**Best Match Spectrum:**

**Scan number** 8042      **Raw file** 20100917-KD-Batch5-Prt-OGE-Mock-Frac8  
**Method** ITMS; CID      **Genenames** HAUS1

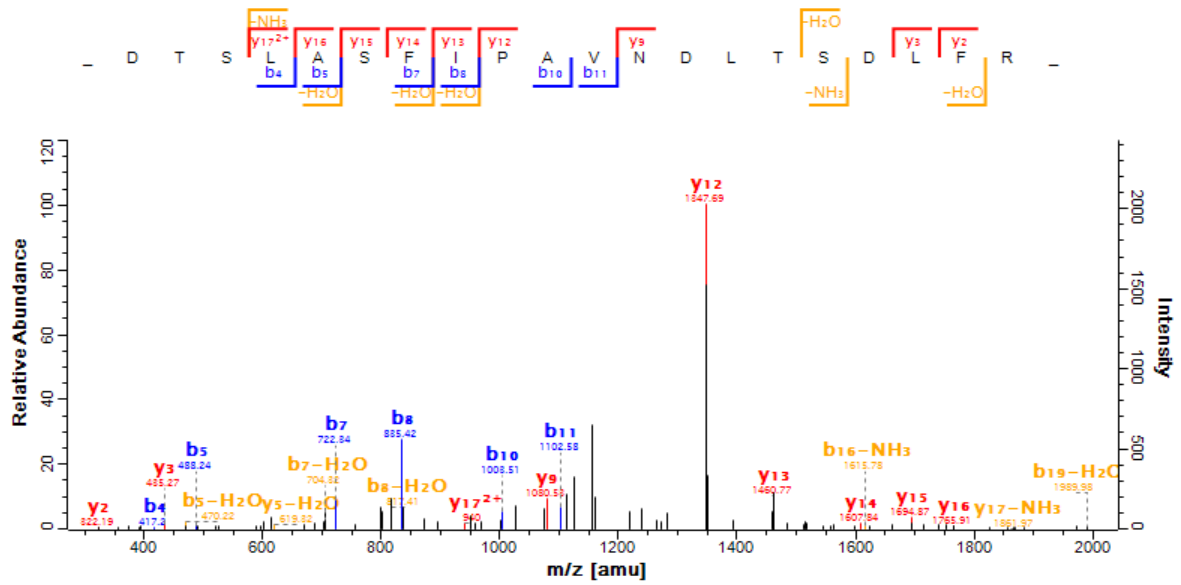

**Protein Group ID:** 1107  
**Protein Accession Numbers:** Q8N3E9; K7EKJ1  
**Gene Names:** PLCD3  
**Peptide Sequence:** VLSAPLEFLQDQGGATLAR  
**Total Number of Spectra:** 2  
**Number of Replicates (out of 10):** 2  
**Best Match Score:** 79.461  
**Best Match Posterior Error Probability:** 0.00016693  
**Best Match Spectrum:**

**Scan number** 6229      **Raw file** OGE-Mock-Frac16  
**Method** ITMS; CID      **Genenames** PLCD3

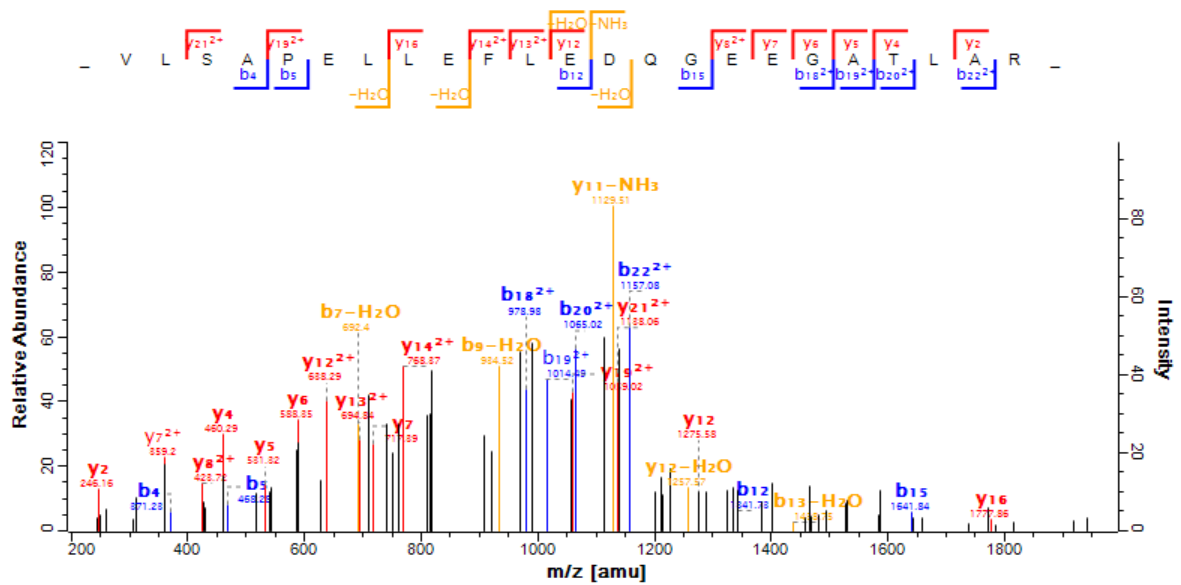

**Protein Group ID:** 1109

**Protein Accession Numbers:** O14732; O14732-2; K7ELF8; K7EL65; Q6PIP6

**Gene Names:** IMPA2

**Peptide Sequence:** TSAADLVTTEDHLVEDLIISELR

**Total Number of Spectra:** 13

**Number of Replicates (out of 10):** 6

**Best Match Score:** 111.65

**Best Match Posterior Error Probability:** 3.46E-09

**Best Match Spectrum:**

**Scan number** 9400      **Raw file** 20100930-KD-Batch5-Prt-OGE-WT-Frac13  
**Method** ITMS; CID      **Genenames** IMPA2

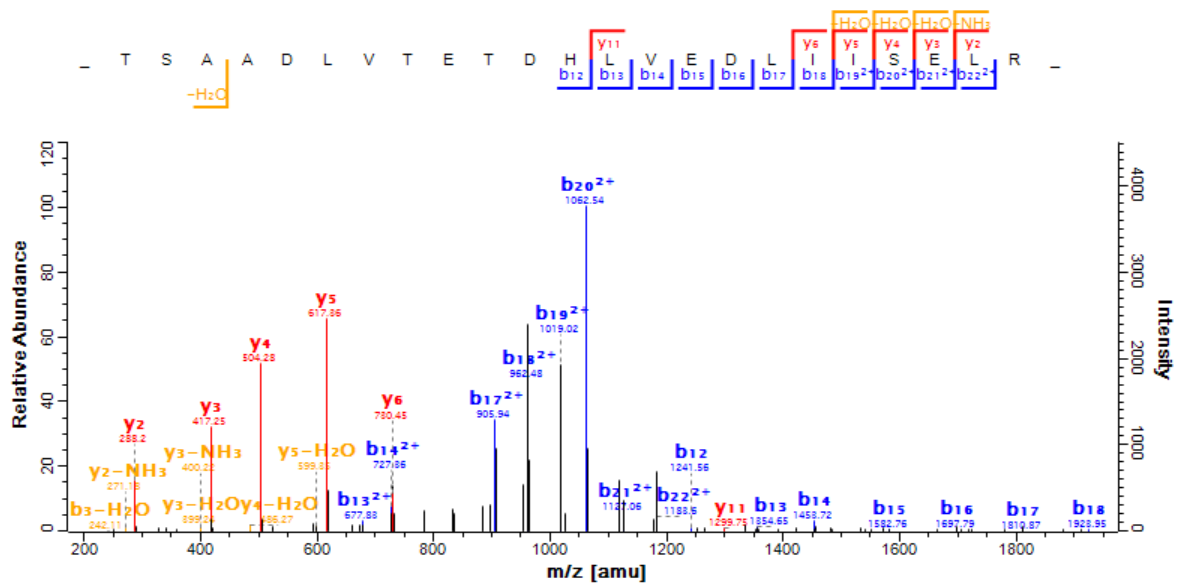

**Protein Group ID:** 1113

**Protein Accession Numbers:** Q6UW68; K7ELQ9; K7EPR0; K7EM09

**Gene Names:** TMEM205

**Peptide Sequence:** GLGGEVPGSHQGPDPYR

**Total Number of Spectra:** 14

**Number of Replicates (out of 10):** 6

**Best Match Score:** 106.58

**Best Match Posterior Error Probability:** 0.00017942

**Best Match Spectrum:**

**Scan number** 1920      **Raw file** 20100927-KD-Batch4-Prt-OGE-WT-Frac12  
**Method** ITMS; CID      **Genenames** TMEM205

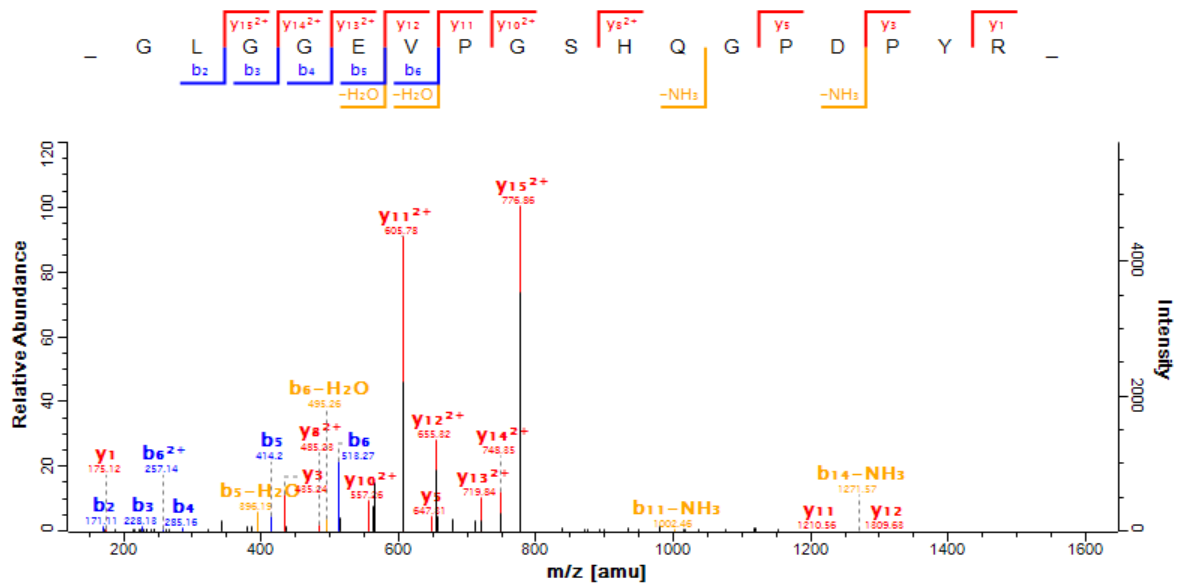

**Protein Group ID:** 1114

**Protein Accession Numbers:** Q96EE3-1; Q96EE3; K7ELV2; K7EP88; K7ENI5

**Gene Names:** SEH1L

**Peptide Sequence:** DLIHDVSFDFHGR

**Total Number of Spectra:** 1

**Number of Replicates (out of 10):** 1

**Best Match Score:** 101.71

**Best Match Posterior Error Probability:** 0.00049825

**Best Match Spectrum:**

**Scan number** 5306      **Raw file** Prt-OGE-Batch2-Mock-Frac18  
**Method** ITMS; CID      **Genenames** SEH1L

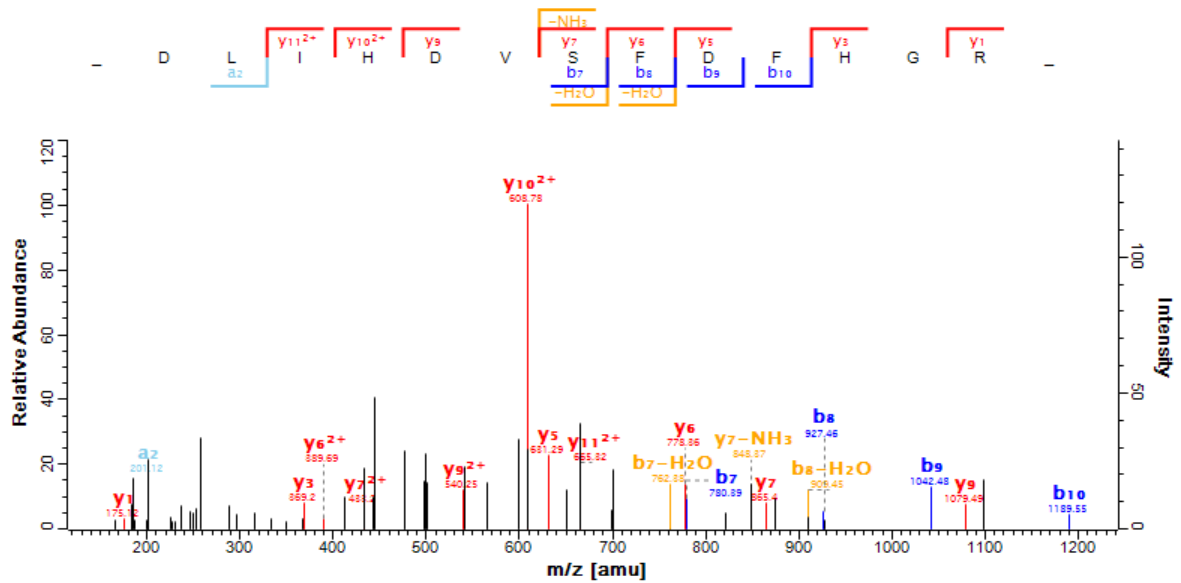



**Protein Group ID:** 1117  
**Protein Accession Numbers:** K7EM50  
**Gene Names:**  
**Peptide Sequence:** DLCLQPESLR  
**Total Number of Spectra:** 7  
**Number of Replicates (out of 10):** 7  
**Best Match Score:** 101.65  
**Best Match Posterior Error Probability:** 0.00052413  
**Best Match Spectrum:**

**Scan number** 3634      **Raw file** OGEWT-Frac4  
**Method** ITMS; CID      **Pepti...** 101.65

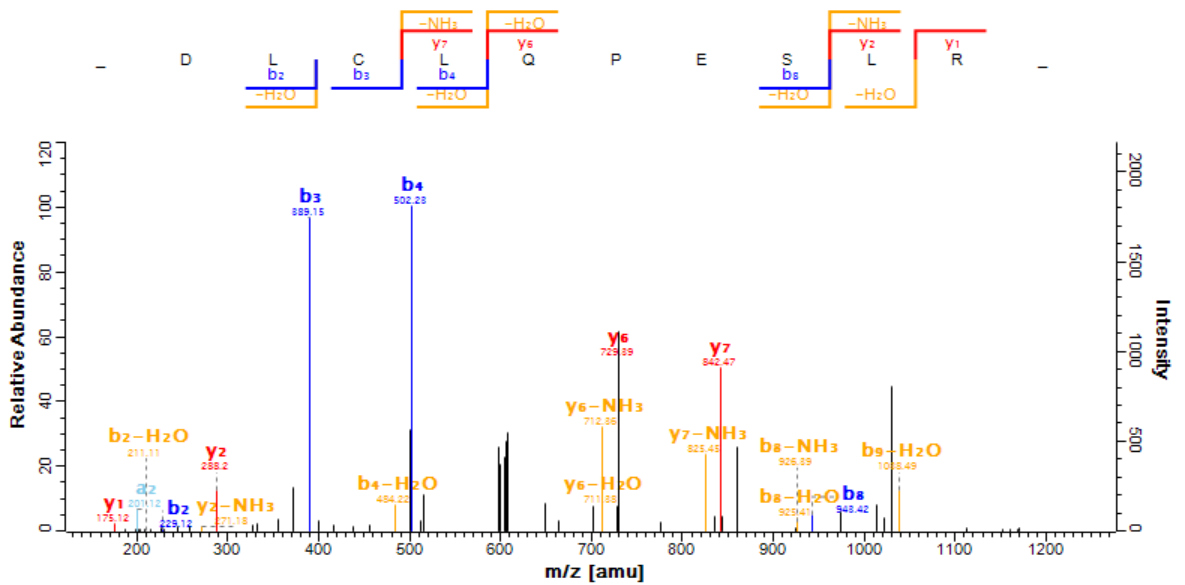

**Protein Group ID:** 1120

**Protein Accession Numbers:** K7EMV4; K7EQ44; K7EPC8; P60002; K7EN05

**Gene Names:** ELOF1

**Peptide Sequence:** MTGTLETQFTCPFNHEK

**Total Number of Spectra:** 1

**Number of Replicates (out of 10):** 1

**Best Match Score:** 109.07

**Best Match Posterior Error Probability:** 0.00012111

**Best Match Spectrum:**

**Scan number** 4545      **Raw file** Prt-OGE-Batch2-Mock-Frac19  
**Method** ITMS; CID      **Genenames** ELOF1

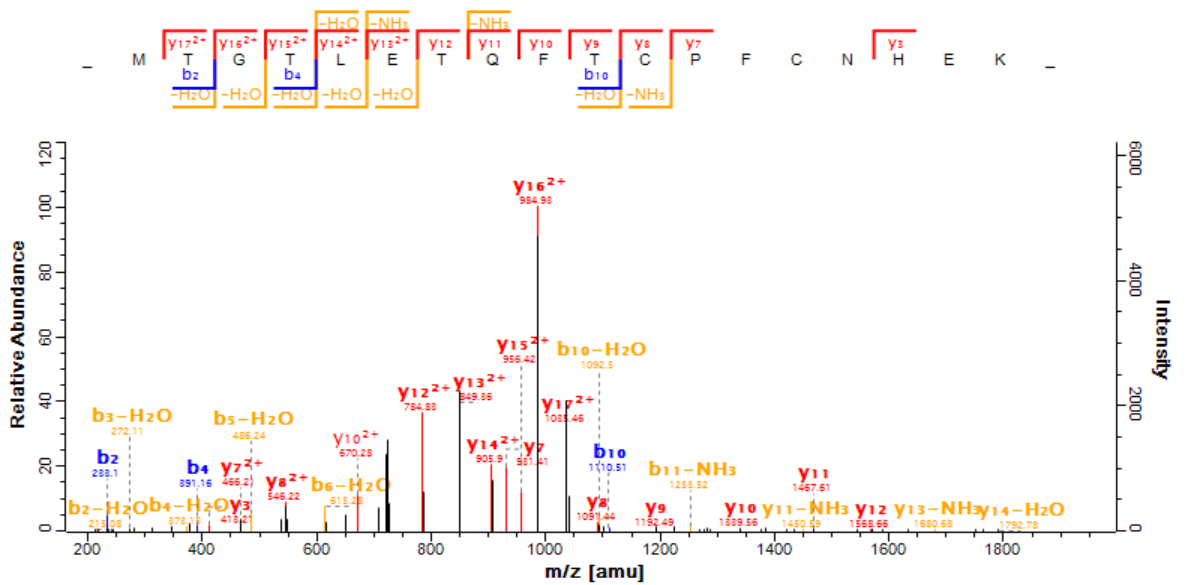

**Protein Group ID:** 1121

**Protein Accession Numbers:** Q8N2U0; K7ERE1; K7ENI6

**Gene Names:** C17orf61

**Peptide Sequence:** AGPAAAFR

**Total Number of Spectra:** 2

**Number of Replicates (out of 10):** 2

**Best Match Score:** 134.66

**Best Match Posterior Error Probability:** 0.0013815

**Best Match Spectrum:**

|                    |           |                  |                                        |
|--------------------|-----------|------------------|----------------------------------------|
| <b>Scan number</b> | 2002      | <b>Raw file</b>  | 20100917-KD-Batch5-Prt-OGE-Mock-Frac21 |
| <b>Method</b>      | ITMS; CID | <b>Genenames</b> | C17orf61                               |

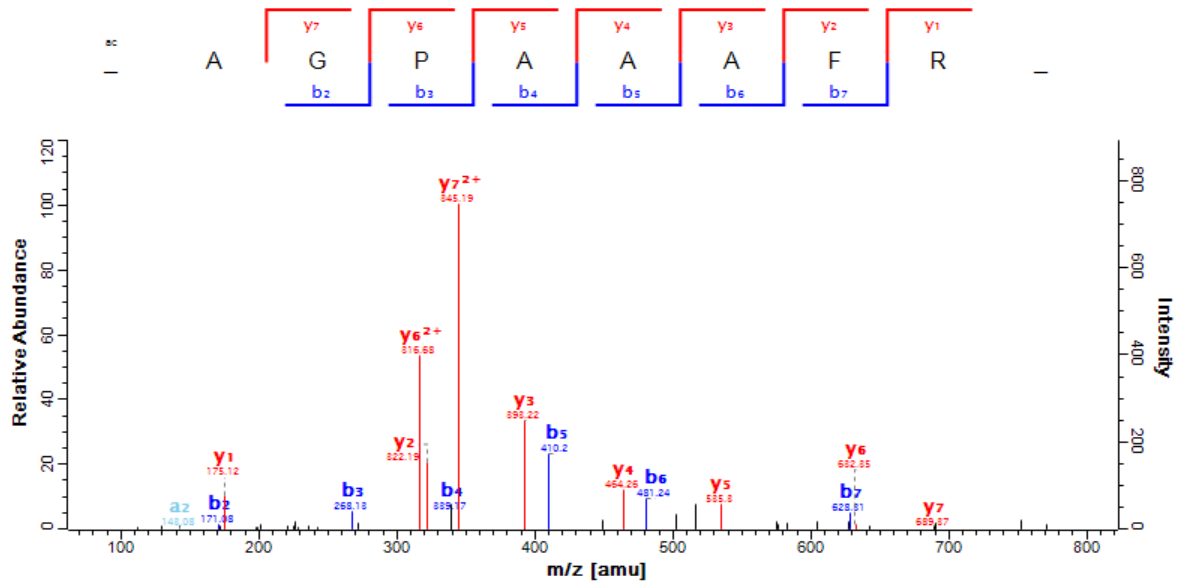

**Protein Group ID:** 1122

**Protein Accession Numbers:** Q9BTD8; K7EP90; Q9BTD8-3; Q9BTD8-2; Q9BTD8-4; K7EQ03

**Gene Names:** RBM42

**Peptide Sequence:** TAAGSSWEDPSLLEWDADDFR

**Total Number of Spectra:** 2

**Number of Replicates (out of 10):** 1

**Best Match Score:** 108.14

**Best Match Posterior Error Probability:** 7.79E-07

**Best Match Spectrum:**

**Scan number** 5086      **Raw file** Prt-OGE-Batch2-WT-Frac14  
**Method** ITMS: CID      **Genenames** RBM42

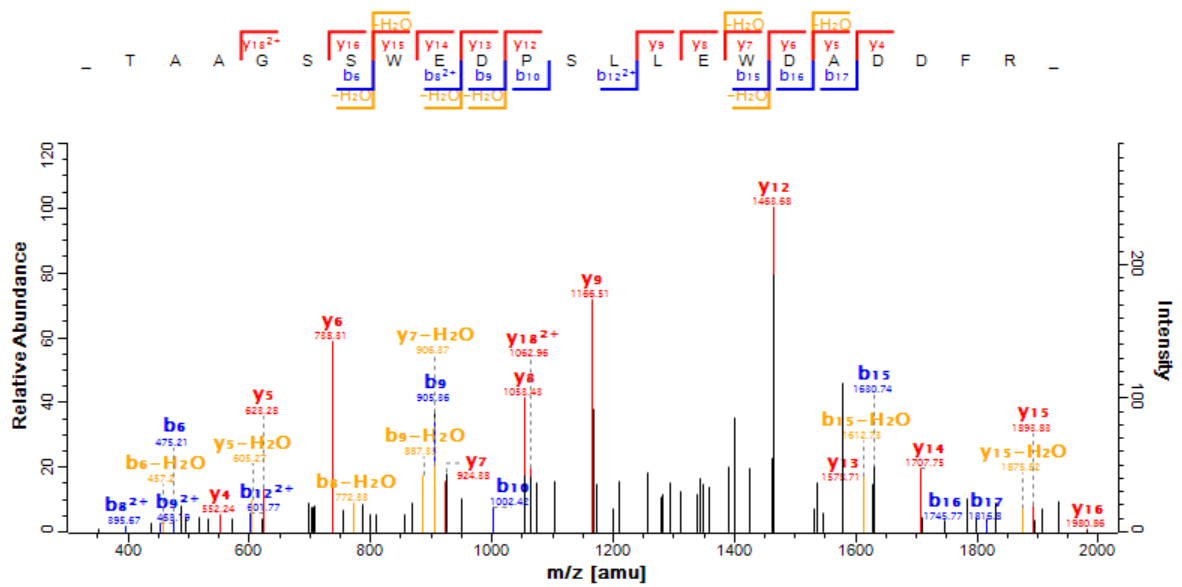

**Protein Group ID:** 1123  
**Protein Accession Numbers:** Q96C10; K7EPP0  
**Gene Names:** DHX58  
**Peptide Sequence:** ELINEALETLMEQAVAAVQK  
**Total Number of Spectra:** 1  
**Number of Replicates (out of 10):** 1  
**Best Match Score:** 130.21  
**Best Match Posterior Error Probability:** 1.40E-07  
**Best Match Spectrum:**

**Scan number** 6953      **Raw file** Prt-OGE-Batch2-WT-Frac17  
**Method** ITMS; CID      **Genenames** DHX58

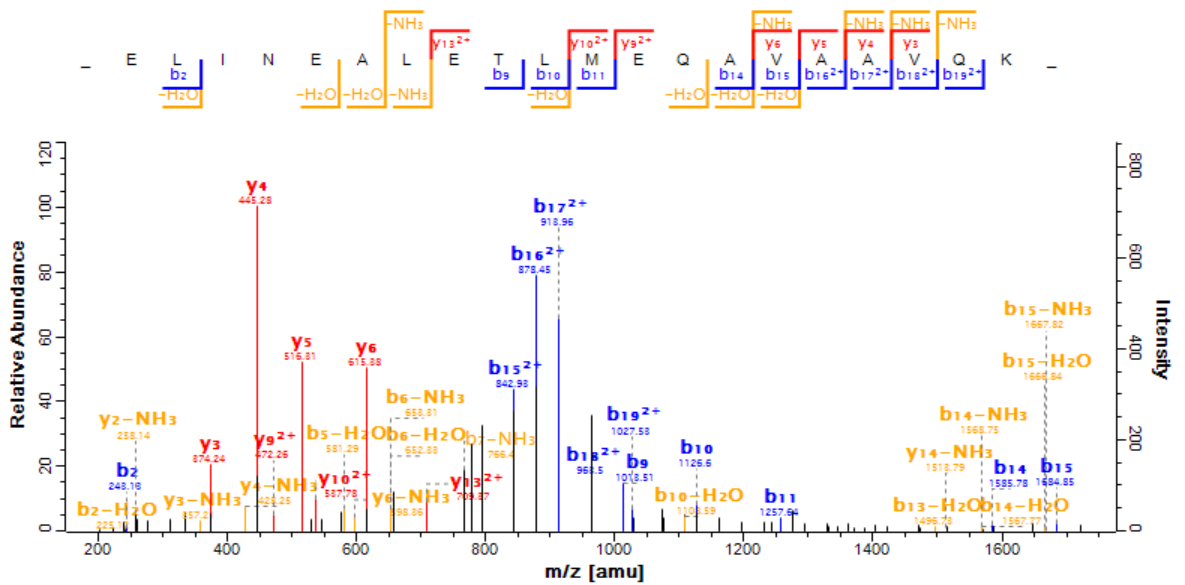

**Protein Group ID:** 1126  
**Protein Accession Numbers:** O75616; K7EQJ8  
**Gene Names:** ERAL1  
**Peptide Sequence:** LLEHLPQEVYVNPVQK  
**Total Number of Spectra:** 2  
**Number of Replicates (out of 10):** 2  
**Best Match Score:** 97.273  
**Best Match Posterior Error Probability:** 0.0002313  
**Best Match Spectrum:**

**Scan number** 3714      **Raw file** 20100914-KD-Batch4-Prt-OGE-Mock-Frac19  
**Method** ITMS; CID      **Genenames** ERAL1

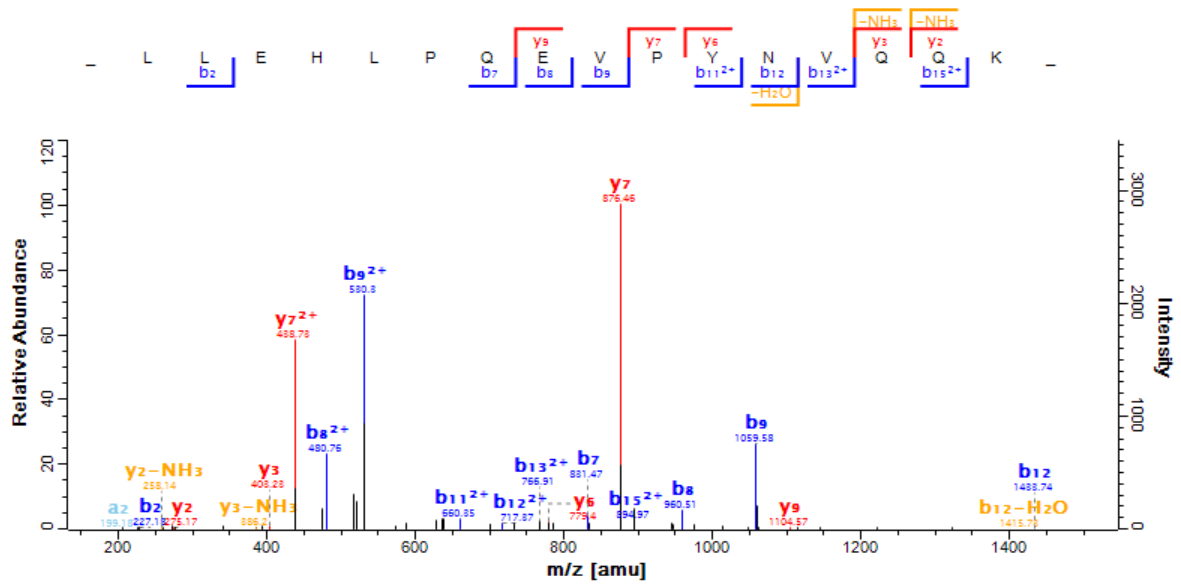

**Protein Group ID:** 1130  
**Protein Accession Numbers:** P83876; K7ESL1  
**Gene Names:** TXNL4A  
**Peptide Sequence:** INWAMEDKQEMVDIIETVYR  
**Total Number of Spectra:** 3  
**Number of Replicates (out of 10):** 3  
**Best Match Score:** 91.475  
**Best Match Posterior Error Probability:** 0.00055968  
**Best Match Spectrum:**

**Scan number** 6531      **Raw file** OGE-Mock-Frac8  
**Method** ITMS; CID      **Genenames** TXNL4A

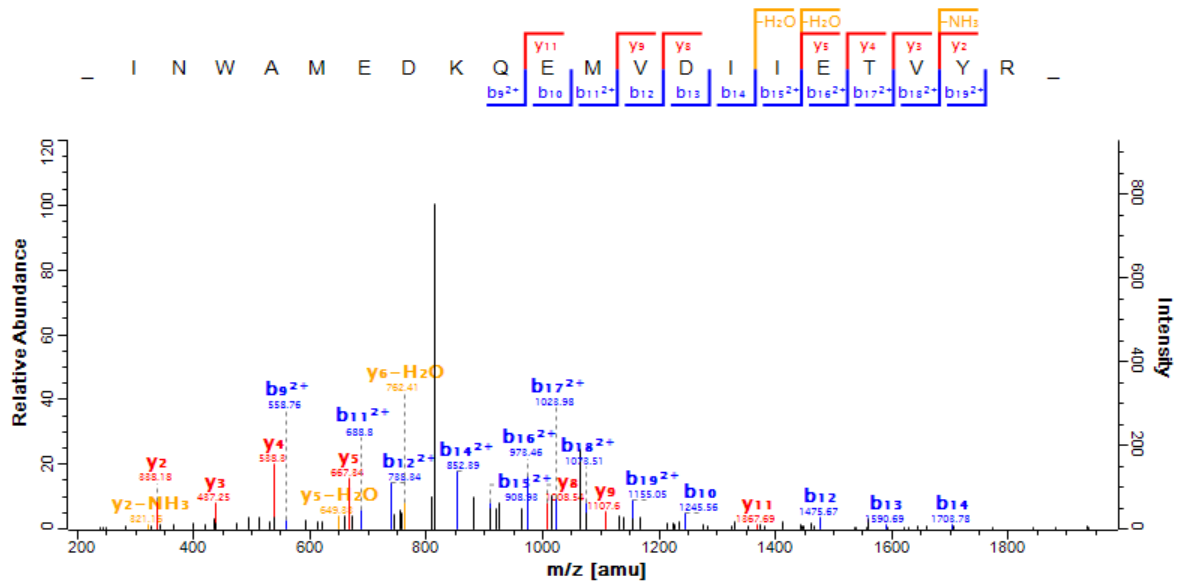

**Protein Group ID:** 1147  
**Protein Accession Numbers:** O00399  
**Gene Names:** DCTN6  
**Peptide Sequence:** VQTERPQPQTLQLDFLMK  
**Total Number of Spectra:** 10  
**Number of Replicates (out of 10):** 7  
**Best Match Score:** 166.04  
**Best Match Posterior Error Probability:** 2.36E-15  
**Best Match Spectrum:**

**Scan number** 4460      **Raw file** Prt-OGE-Batch3-WT-Frac10  
**Method** ITMS; CID      **Genenames** DCTN6

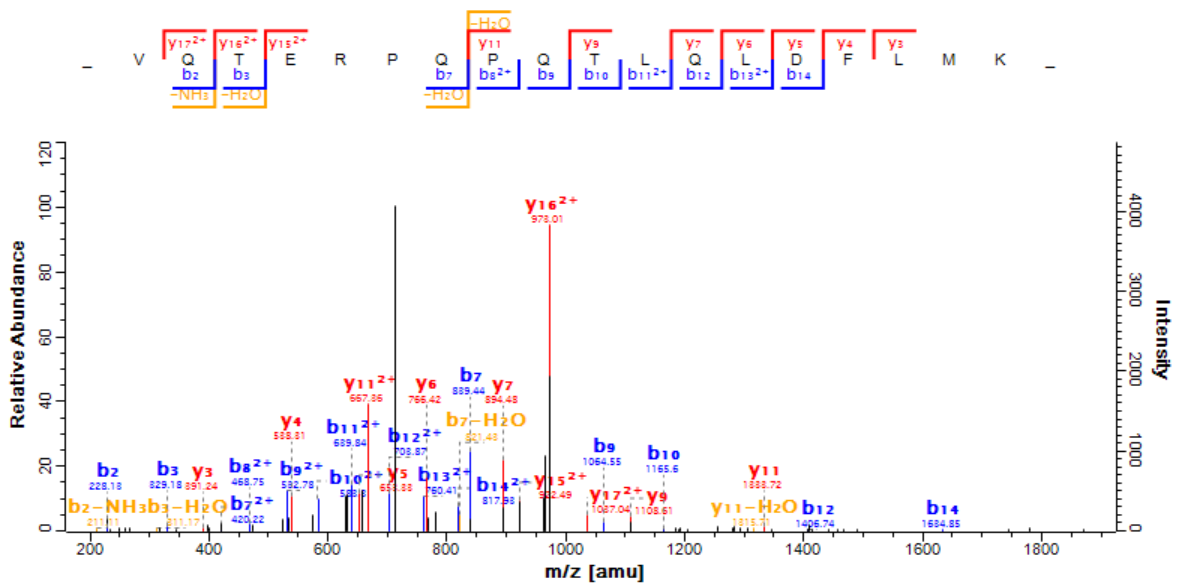



**Protein Group ID:** 1166  
**Protein Accession Numbers:** O14602; A6NJH9  
**Gene Names:** EIF1AY  
**Peptide Sequence:** LEALCFDGVK  
**Total Number of Spectra:** 2  
**Number of Replicates (out of 10):** 2  
**Best Match Score:** 89.171  
**Best Match Posterior Error Probability:** 0.0012298  
**Best Match Spectrum:**

**Scan number** 3752      **Raw file** 20100914-KD-Batch4-Prt-OGE-Mock-Frac7  
**Method** ITMS; CID      **Genenames** EIF1AY

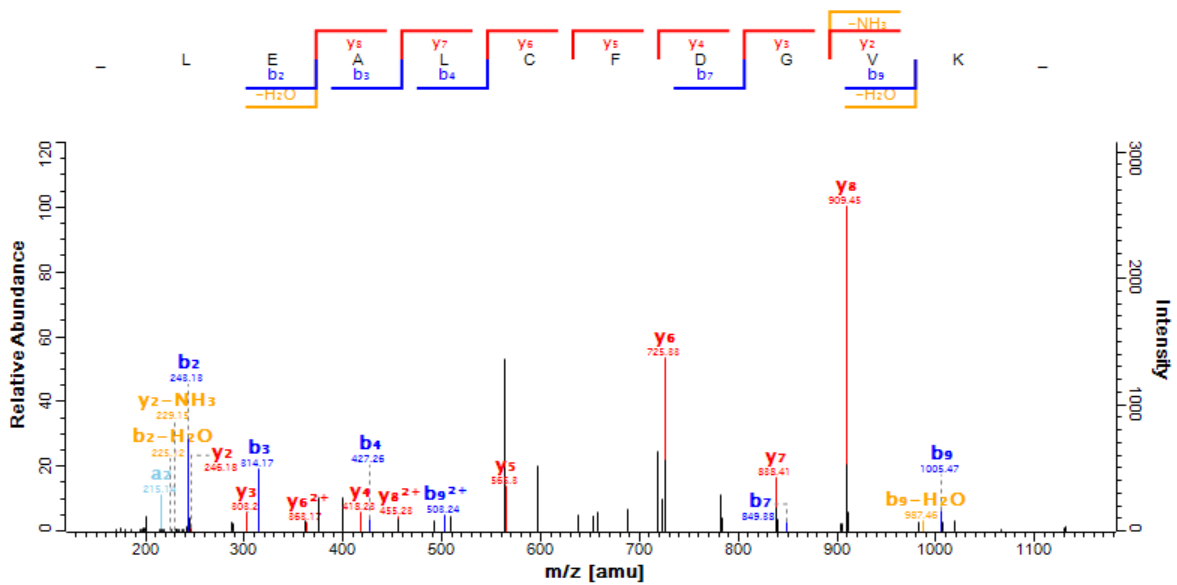

**Protein Group ID:** 1167

**Protein Accession Numbers:** O14613

**Gene Names:** CDC42EP2

**Peptide Sequence:** FHLLPGTMVEGPEE<sup>-H<sub>2</sub>O</sup>DEE<sup>-H<sub>2</sub>O</sup>DGTFLDLPFQFTR

**Total Number of Spectra:** 1

**Number of Replicates (out of 10):** 1

**Best Match Score:** 67.979

**Best Match Posterior Error Probability:** 0.00013526

**Best Match Spectrum:**

|                    |           |                  |                                     |
|--------------------|-----------|------------------|-------------------------------------|
| <b>Scan number</b> | 6547      | <b>Raw file</b>  | 20100930-KD-Batch5-Prt-OGE-WT-Frac4 |
| <b>Method</b>      | ITMS; CID | <b>Genenames</b> | CDC42EP2                            |

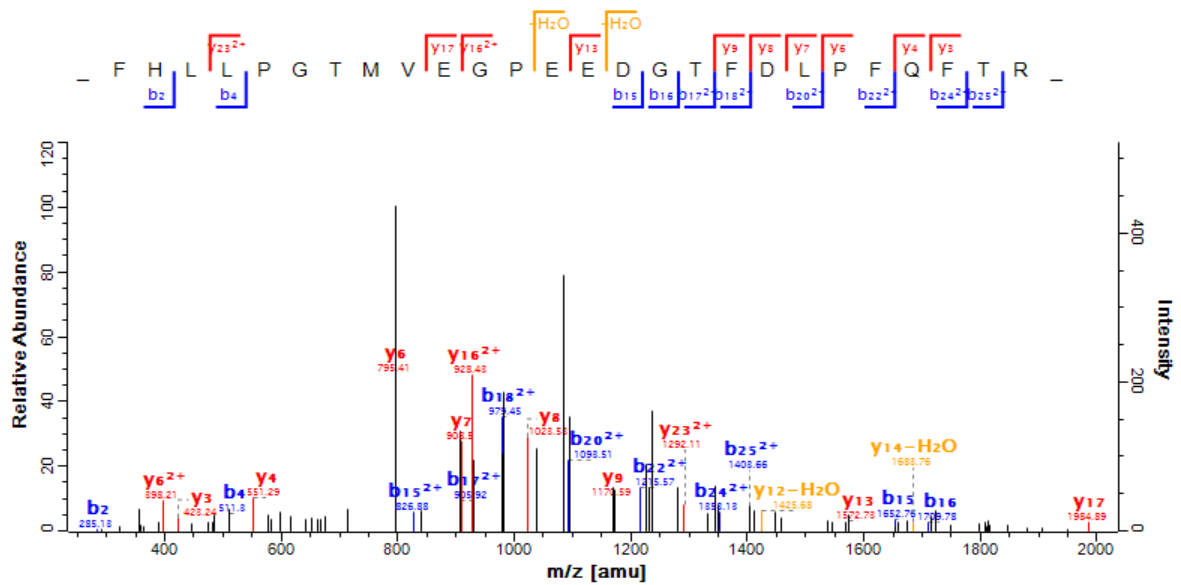

**Protein Group ID:** 1169  
**Protein Accession Numbers:** O14684  
**Gene Names:** PTGES  
**Peptide Sequence:** AFANPEDALR  
**Total Number of Spectra:** 1  
**Number of Replicates (out of 10):** 1  
**Best Match Score:** 91.584  
**Best Match Posterior Error Probability:** 0.0010579  
**Best Match Spectrum:**

**Scan number** 2189      **Raw file** Prt-OGE-Batch3-WT-Frac1  
**Method** ITMS; CID      **Genenames** PTGES

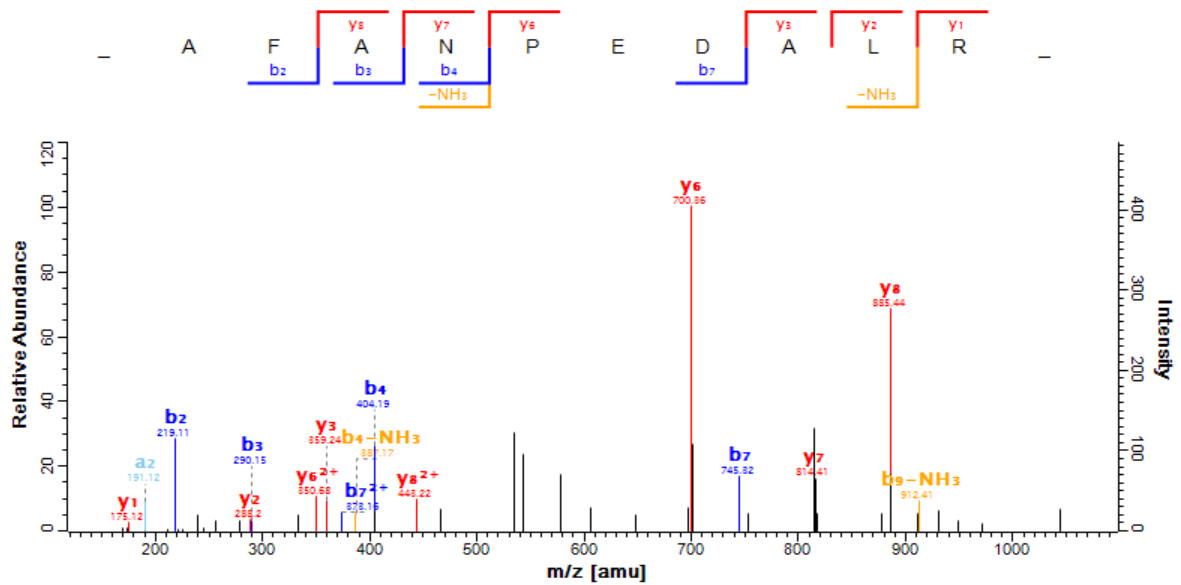

**Protein Group ID:** 1176  
**Protein Accession Numbers:** O14828; O14828-2  
**Gene Names:** SCAMP3  
**Peptide Sequence:** TAAANAAAGAAENAFR  
**Total Number of Spectra:** 1  
**Number of Replicates (out of 10):** 1  
**Best Match Score:** 85.469  
**Best Match Posterior Error Probability:** 0.00061563  
**Best Match Spectrum:**

**Scan number** 2115      **Raw file** Prt-OGE-Batch3-WT-Frac1  
**Method** ITMS; CID      **Genenames** SCAMP3

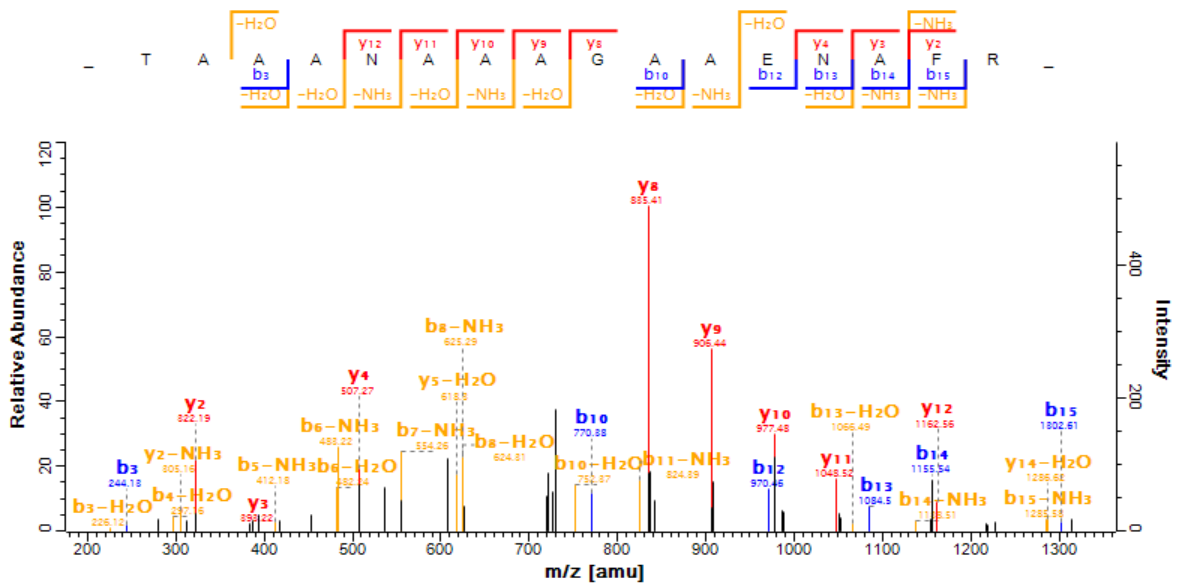

**Protein Group ID:** 1181

**Protein Accession Numbers:** O14950

**Gene Names:** MYL12B

**Peptide Sequence:** NPTDAYLDAMMNEAPGPINFTMFLTMFGEK

**Total Number of Spectra:** 2

**Number of Replicates (out of 10):** 2

**Best Match Score:** 120.31

**Best Match Posterior Error Probability:** 6.27E-28

**Best Match Spectrum:**

**Scan number** 7205      **Raw file** OGEWT-Frac4  
**Method** ITMS; CID      **Genenames** MYL12B

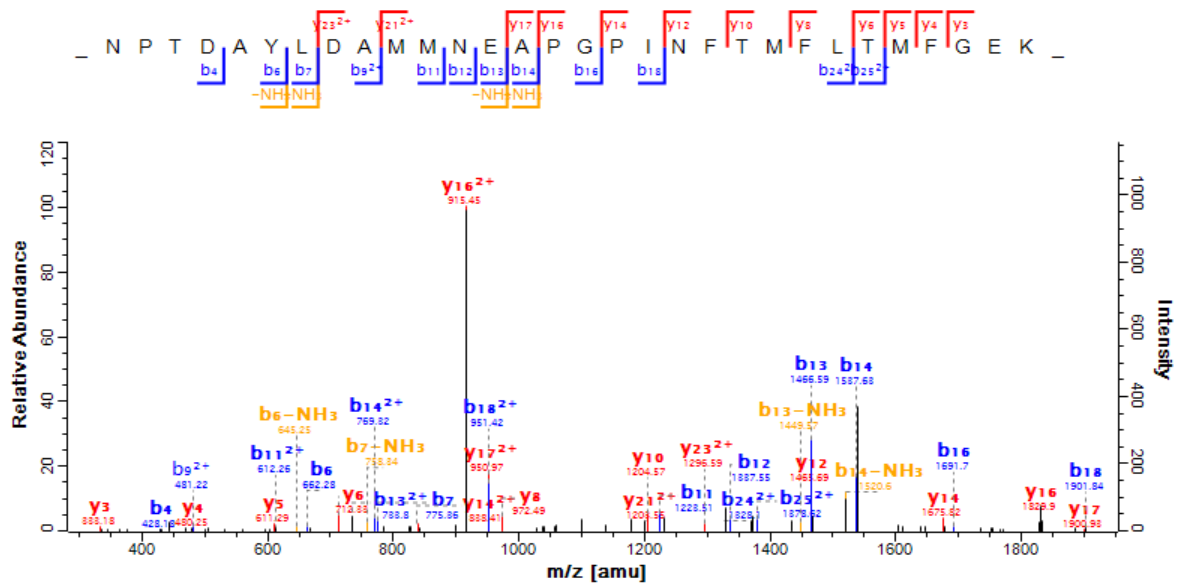

**Protein Group ID:** 1182  
**Protein Accession Numbers:** O14957  
**Gene Names:** UQCR11  
**Peptide Sequence:** LILDWVPYINGK  
**Total Number of Spectra:** 4  
**Number of Replicates (out of 10):** 3  
**Best Match Score:** 109.24  
**Best Match Posterior Error Probability:** 0.0020184  
**Best Match Spectrum:**

**Scan number** 5900      **Raw file** 20100917-KD-Batch5-Prt-OGE-Mock-Frac23  
**Method** ITMS; CID      **Genenames** UQCR11

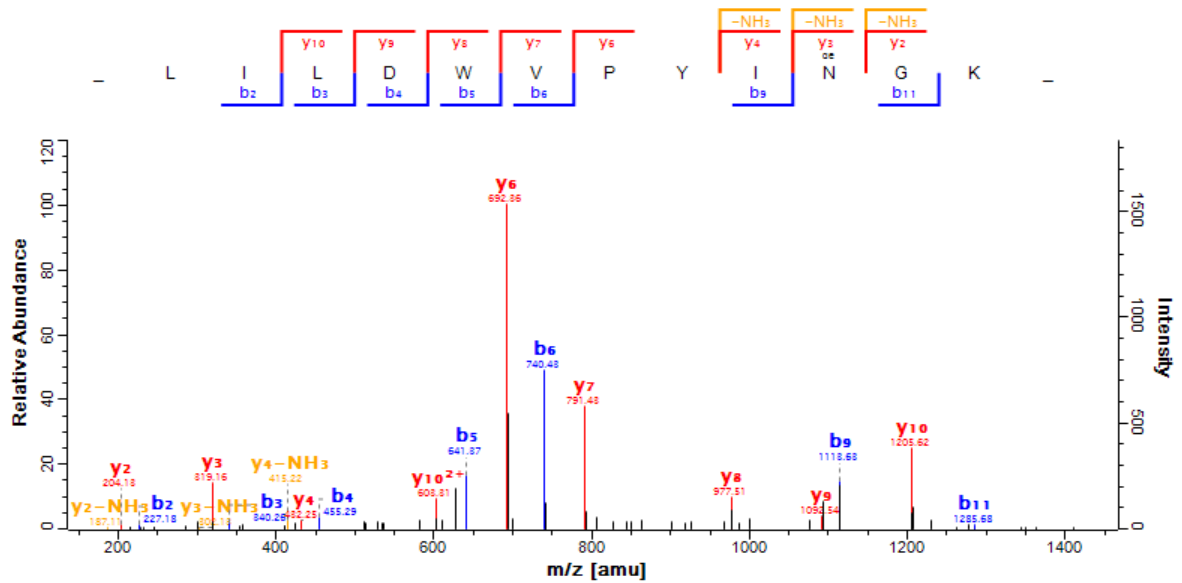

**Protein Group ID:** 1188  
**Protein Accession Numbers:** O15069  
**Gene Names:** NACAD  
**Peptide Sequence:** DIELVMAQANVSR  
**Total Number of Spectra:** 13  
**Number of Replicates (out of 10):** 8  
**Best Match Score:** 239.03  
**Best Match Posterior Error Probability:** 1.25E-68  
**Best Match Spectrum:**

**Scan number** 4331      **Raw file** OGE-Mock-Frac5  
**Method** ITMS; CID      **Genenames** NACAD

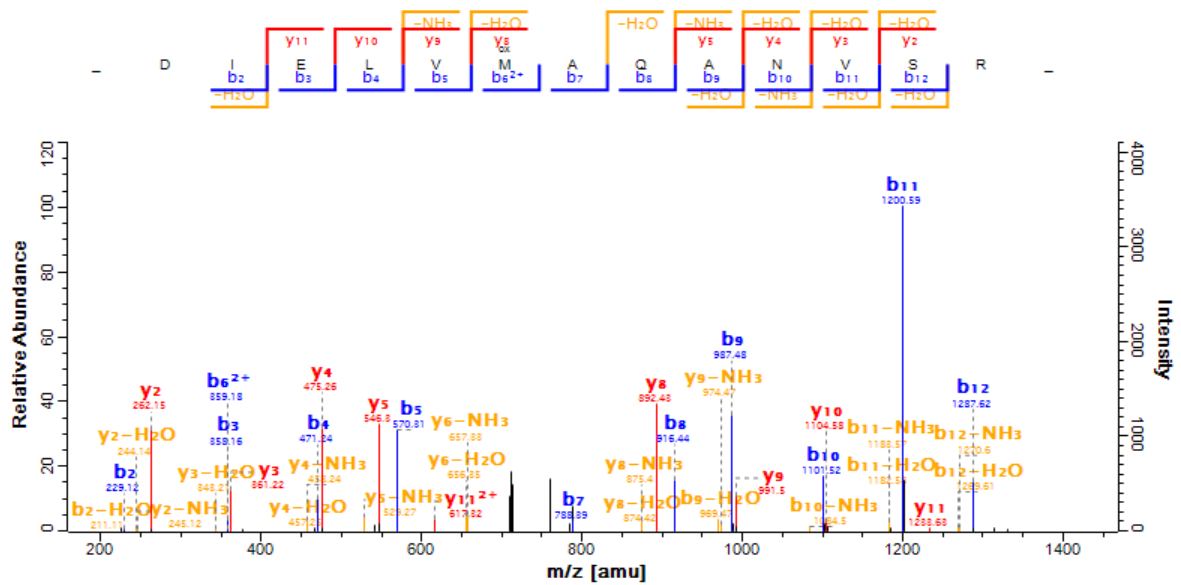

**Protein Group ID:** 1202

**Protein Accession Numbers:** O15446-2; O15446

**Gene Names:** CD3EAP

**Peptide Sequence:** GHTVTEPIQLPEPELPGEGQPEAR

**Total Number of Spectra:** 1

**Number of Replicates (out of 10):** 1

**Best Match Score:** 108.37

**Best Match Posterior Error Probability:** 2.93E-09

**Best Match Spectrum:**

**Scan number** 3043      **Raw file** Prt-OGE-Batch3-WT-Frac18  
**Method** ITMS; CID      **Genenames** CD3EAP

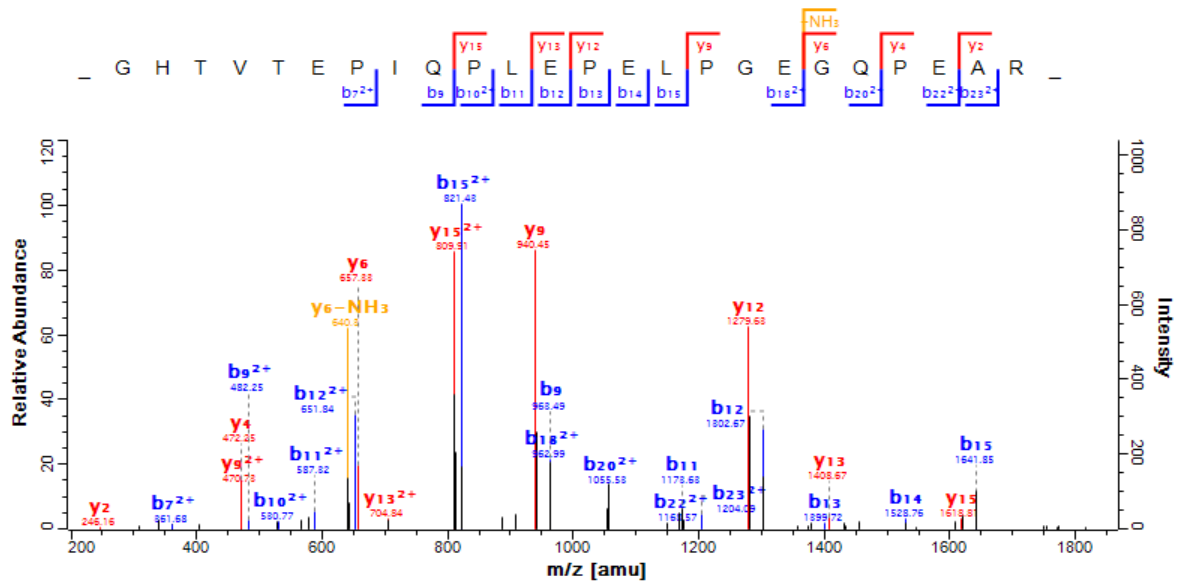



**Protein Group ID:** 1216  
**Protein Accession Numbers:** O43298  
**Gene Names:** ZBTB43  
**Peptide Sequence:** SDGNLIGHRQEAAALAAAGYSENIEMVVTGK  
**Total Number of Spectra:** 1  
**Number of Replicates (out of 10):** 1  
**Best Match Score:** 58.812  
**Best Match Posterior Error Probability:** 0.00069073  
**Best Match Spectrum:**

**Scan number** 6589      **Raw file** OGE-Mock-Frac7  
**Method** ITMS; CID      **Genenames** ZBTB43

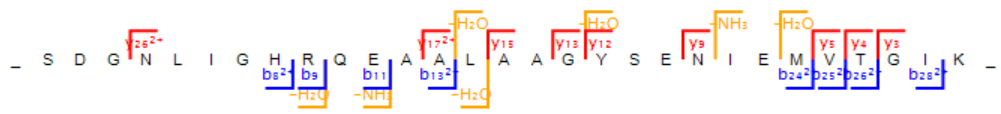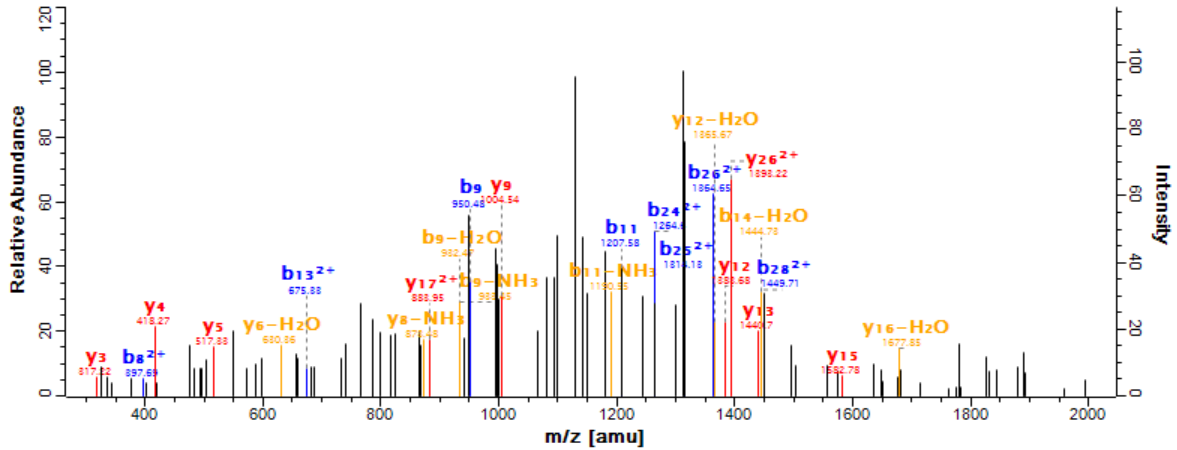

**Protein Group ID:** 1218  
**Protein Accession Numbers:** O43353; O43353-2  
**Gene Names:** RIPK2  
**Peptide Sequence:** QMGLQPYPEILVVS  
**Total Number of Spectra:** 1  
**Number of Replicates (out of 10):** 1  
**Best Match Score:** 100.4  
**Best Match Posterior Error Probability:** 0.00011776  
**Best Match Spectrum:**

**Scan number** 4509      **Raw file** Prt-OGE-Batch2-WT-Frac15  
**Method** ITMS; CID      **Genenames** RIPK2

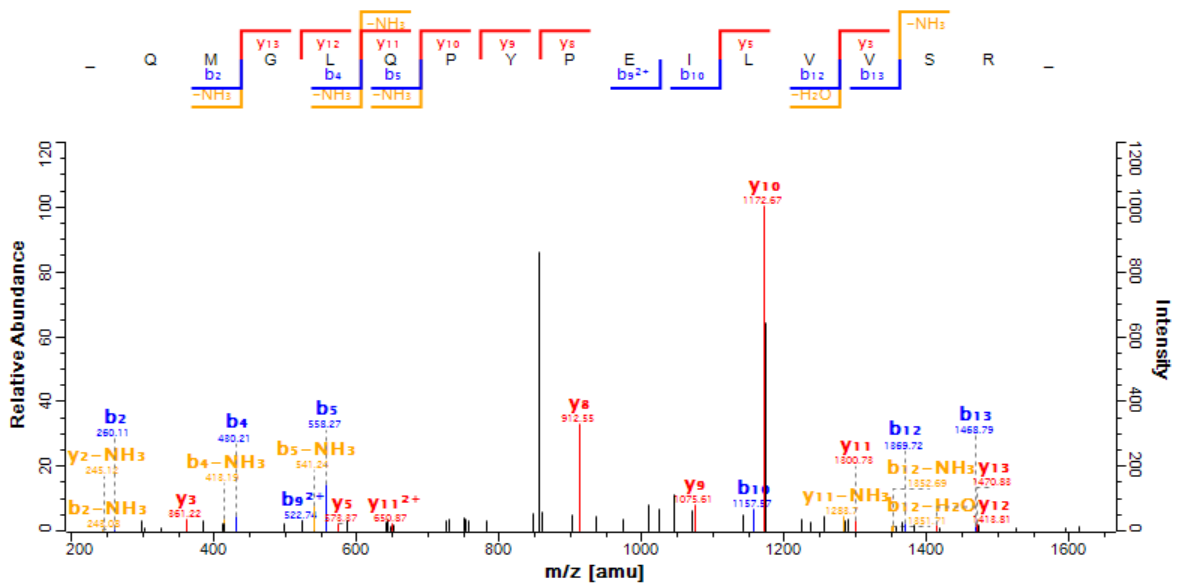

**Protein Group ID:** 1259  
**Protein Accession Numbers:** O60508; Q5SRN1  
**Gene Names:** CDC40  
**Peptide Sequence:** IVQWDIRSGEIVQEYDR  
**Total Number of Spectra:** 1  
**Number of Replicates (out of 10):** 1  
**Best Match Score:** 89.992  
**Best Match Posterior Error Probability:** 0.0016079  
**Best Match Spectrum:**

**Scan number** 6246      **Raw file** OGE-WT-Frac20  
**Method** ITMS; CID      **Genenames** CDC40

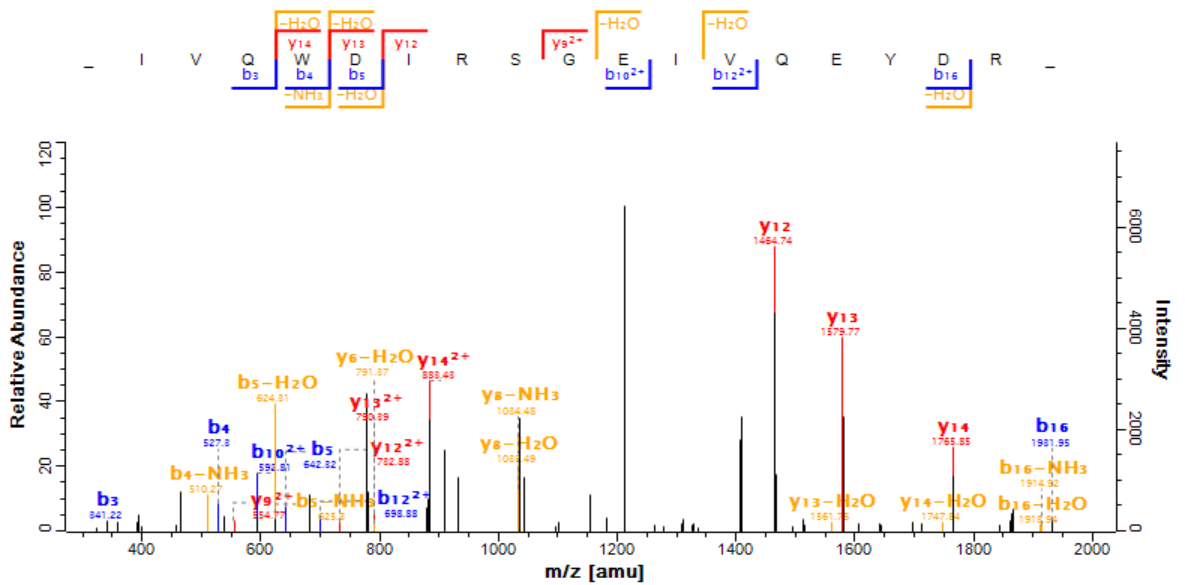

**Protein Group ID:** 1260  
**Protein Accession Numbers:** O60518  
**Gene Names:** RANBP6  
**Peptide Sequence:** FMQDASNVMQLLLK  
**Total Number of Spectra:** 1  
**Number of Replicates (out of 10):** 1  
**Best Match Score:** 130.24  
**Best Match Posterior Error Probability:** 0.00033373  
**Best Match Spectrum:**

**Scan number** 5637      **Raw file** OGE-WT-Frac3  
**Method** ITMS; CID      **Genenames** RANBP6

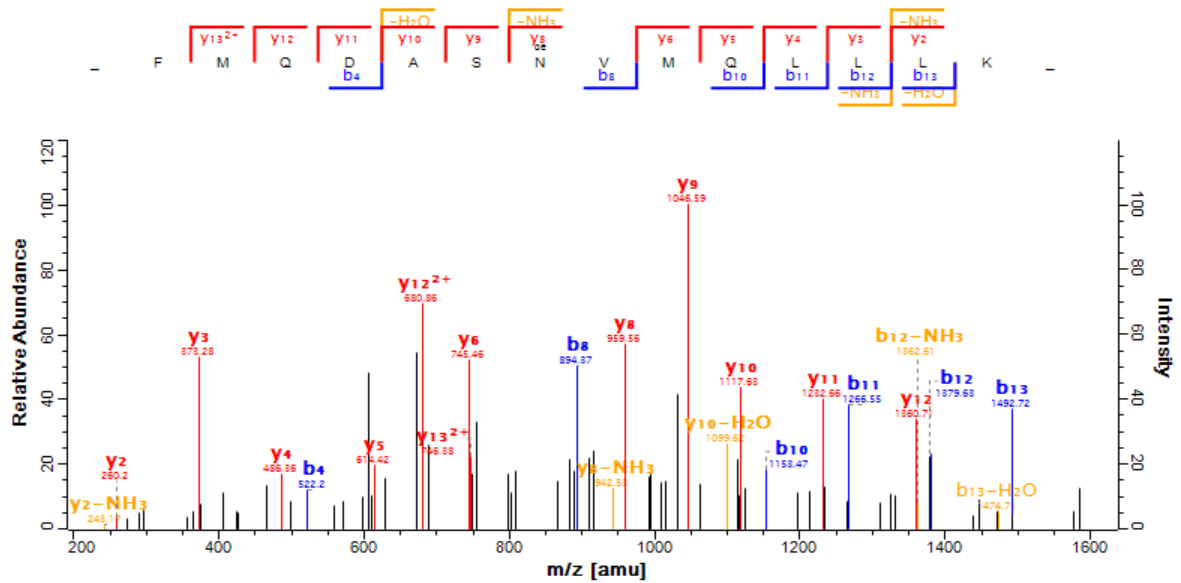

**Protein Group ID:** 1283

**Protein Accession Numbers:** O75155; O75155-2

**Gene Names:** CAND2

**Peptide Sequence:** SPIMADFSQIRSNPELAALFESI QK

**Total Number of Spectra:** 5

**Number of Replicates (out of 10):** 4

**Best Match Score:** 129.07

**Best Match Posterior Error Probability:** 1.54E-14

**Best Match Spectrum:**

**Scan number** 6450      **Raw file** Prt-OGE-Batch2-WT-Frac12  
**Method** ITMS; CID      **Genenames** CAND2

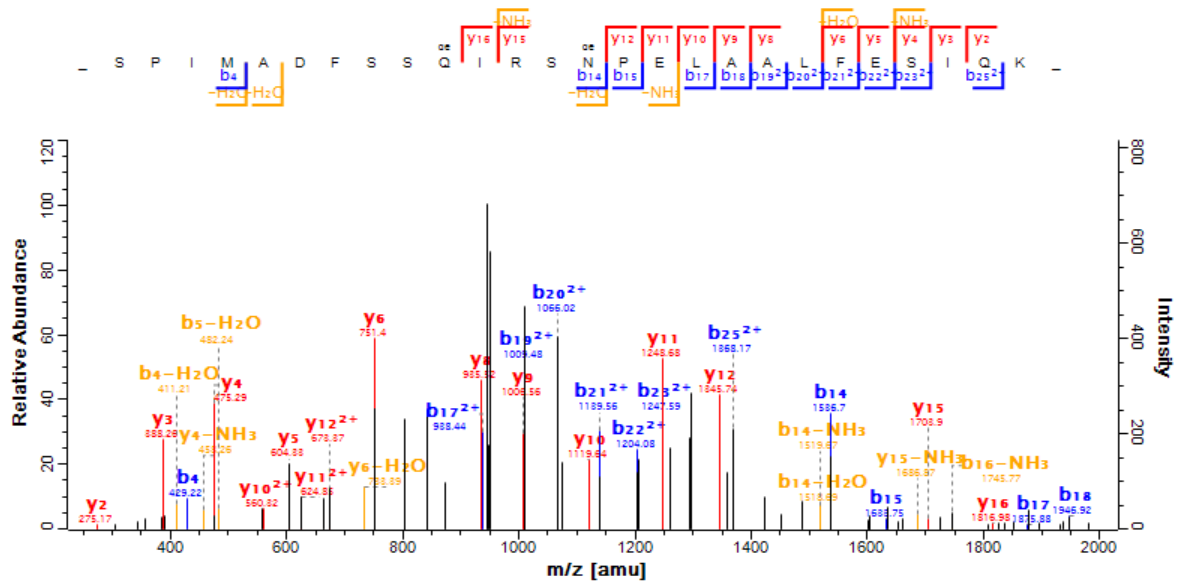

**Protein Group ID:** 1304  
**Protein Accession Numbers:** O75438-2; O75438  
**Gene Names:** NDUFB1  
**Peptide Sequence:** ELQPSEEVTWK  
**Total Number of Spectra:** 5  
**Number of Replicates (out of 10):** 4  
**Best Match Score:** 148.28  
**Best Match Posterior Error Probability:** 1.38E-05  
**Best Match Spectrum:**

**Scan number** 3481      **Raw file** Prt-OGE-Batch2-Mock-Frac20  
**Method** ITMS; CID      **Genenames** NDUFB1

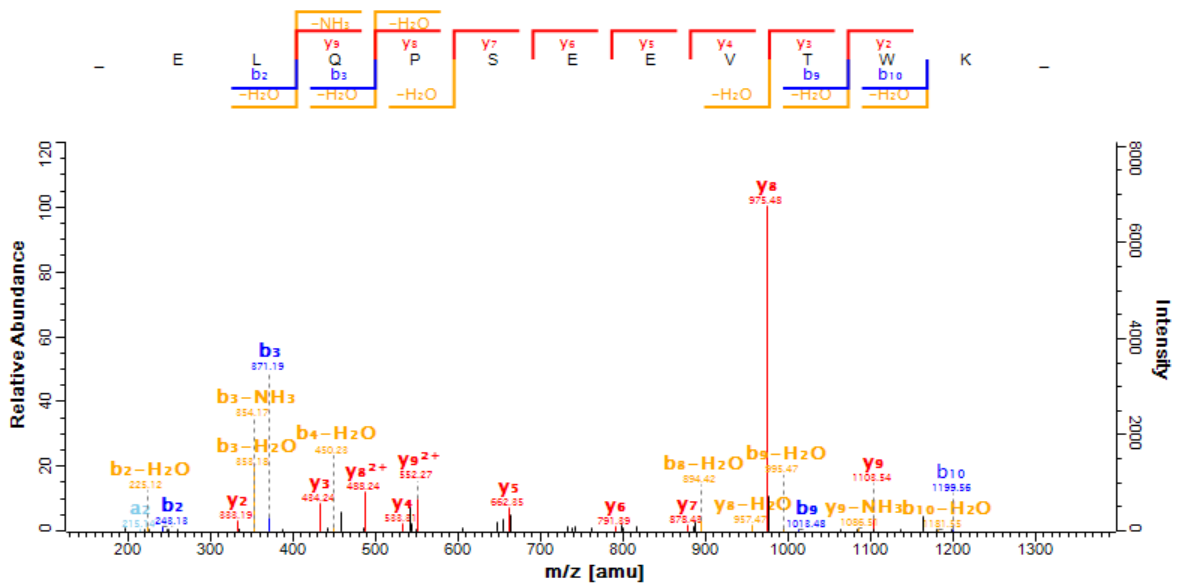

**Protein Group ID:** 1307  
**Protein Accession Numbers:** O75477  
**Gene Names:** ERLIN1  
**Peptide Sequence:** EALEPSGENVIQNK  
**Total Number of Spectra:** 1  
**Number of Replicates (out of 10):** 1  
**Best Match Score:** 181.67  
**Best Match Posterior Error Probability:** 4.38E-15  
**Best Match Spectrum:**

**Scan number** 2784      **Raw file** Prt-OGE-Batch2-Mock-Frac17  
**Method** ITMS; CID      **Genenames** ERLIN1

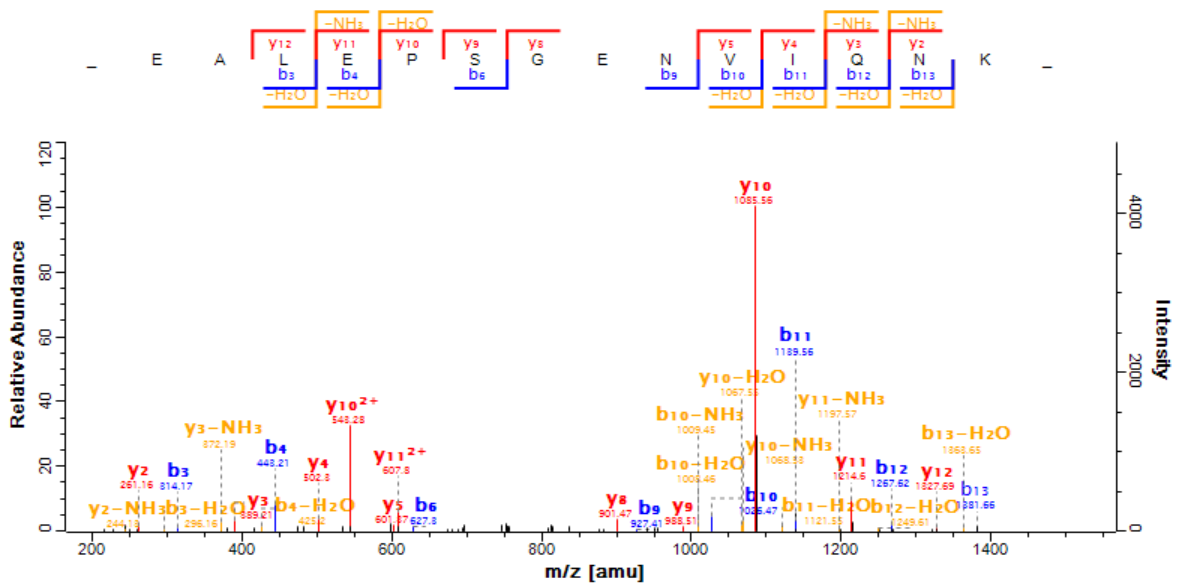

**Protein Group ID:** 1318  
**Protein Accession Numbers:** O75629  
**Gene Names:** CREG1  
**Peptide Sequence:** FVTHVSDWGLATISLTLEAVR  
**Total Number of Spectra:** 10  
**Number of Replicates (out of 10):** 5  
**Best Match Score:** 111.01  
**Best Match Posterior Error Probability:** 3.04E-07  
**Best Match Spectrum:**

**Scan number** 6340      **Raw file** 20100917-KD-Batch5-Prt-OGE-Mock-Frac11  
**Method** ITMS; CID      **Genenames** CREG1

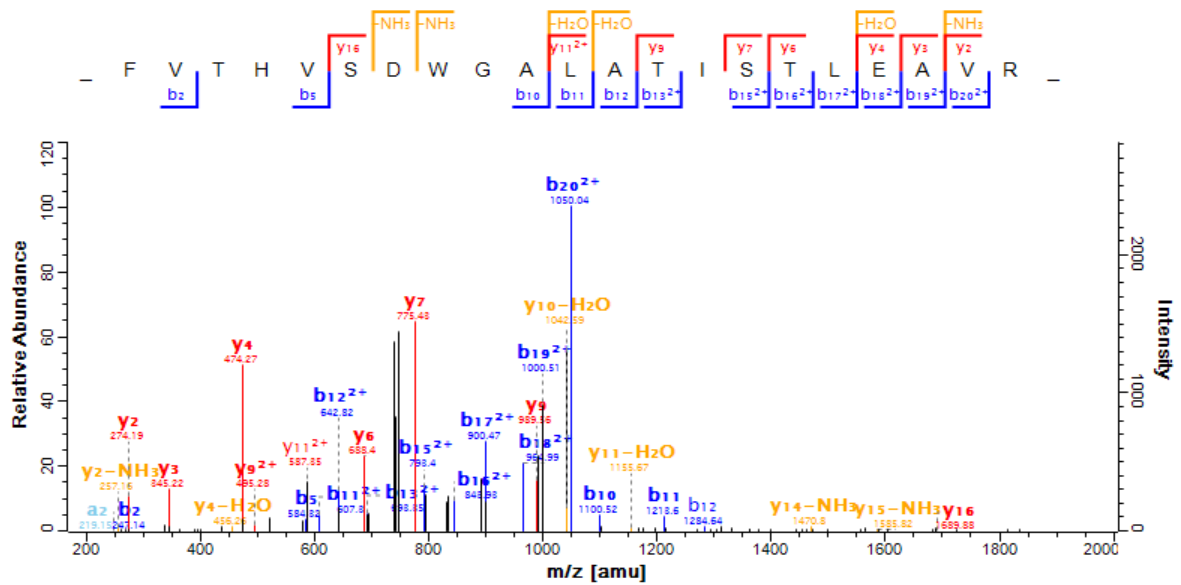



**Protein Group ID:** 1326  
**Protein Accession Numbers:** O75844  
**Gene Names:** ZMPSTE24  
**Peptide Sequence:** IVLFDTLLLEEYSVLN K  
**Total Number of Spectra:** 9  
**Number of Replicates (out of 10):** 6  
**Best Match Score:** 136.3  
**Best Match Posterior Error Probability:** 1.08E-05  
**Best Match Spectrum:**

**Scan number** 6780      **Raw file** OGE-WT-Frac11  
**Method** ITMS; CID      **Genenames** ZMPSTE24

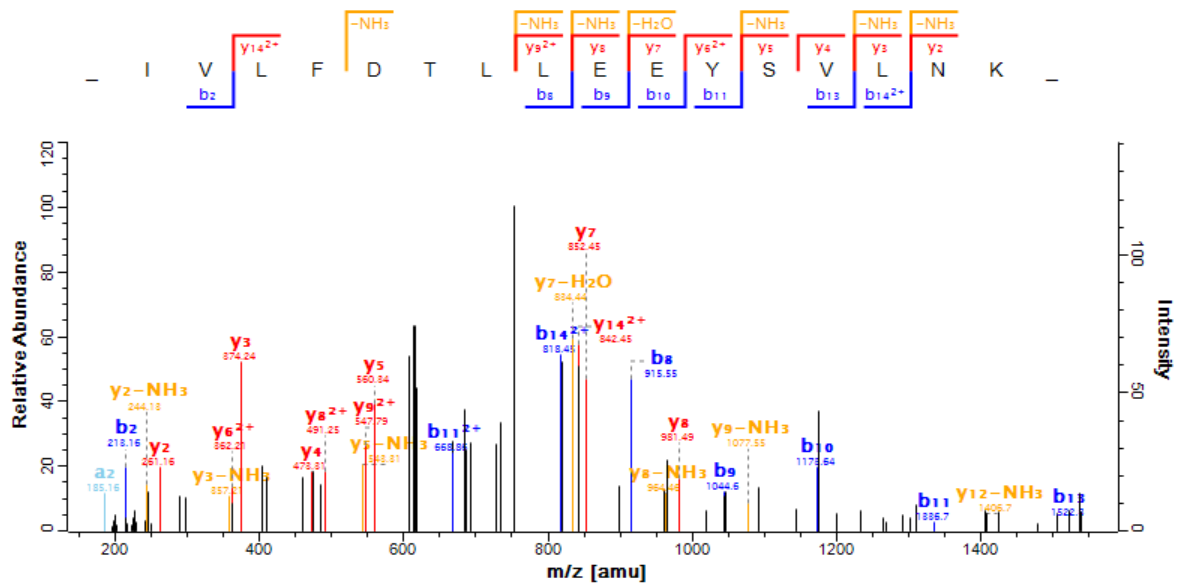

**Protein Group ID:** 1357  
**Protein Accession Numbers:** O95218; O95218-2  
**Gene Names:** ZRANB2  
**Peptide Sequence:** GLFSANDWQCK  
**Total Number of Spectra:** 2  
**Number of Replicates (out of 10):** 2  
**Best Match Score:** 87.001  
**Best Match Posterior Error Probability:** 0.0011251  
**Best Match Spectrum:**

**Scan number** 3232      **Raw file** 20100927-KD-Batch4-Prt-OGE-WT-Frac17  
**Method** ITMS; CID      **Genenames** ZRANB2

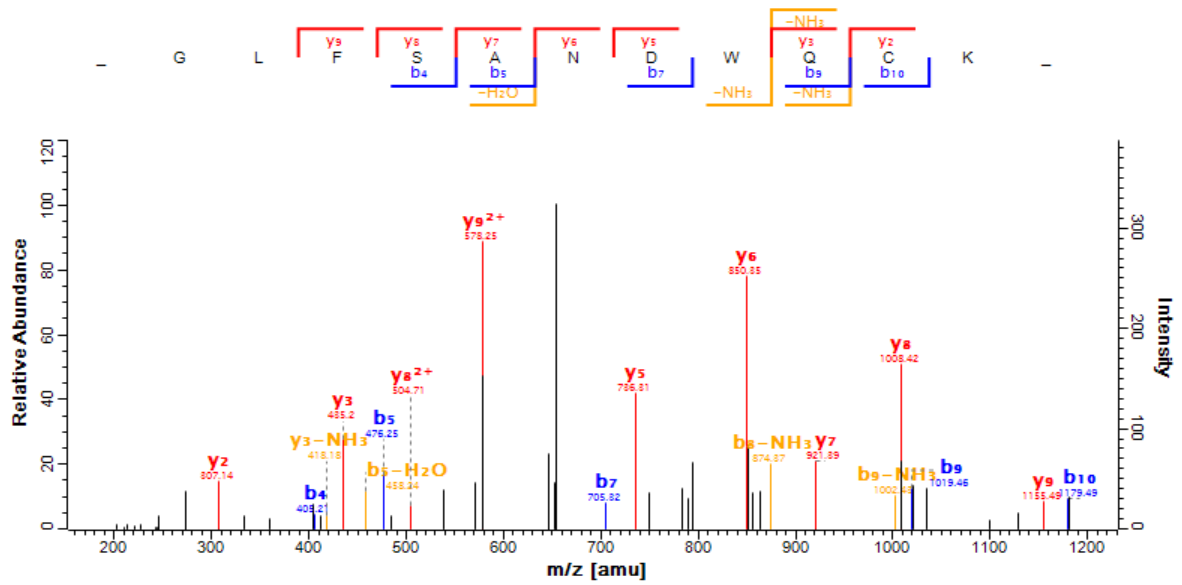

**Protein Group ID:** 1360  
**Protein Accession Numbers:** O95239; O95239-2  
**Gene Names:** KIF4A  
**Peptide Sequence:** LQELEGQIADLK  
**Total Number of Spectra:** 1  
**Number of Replicates (out of 10):** 1  
**Best Match Score:** 150.11  
**Best Match Posterior Error Probability:** 4.84E-05  
**Best Match Spectrum:**

**Scan number** 4347      **Raw file** Prt-OGE-Batch2-Mock-Frac13  
**Method** ITMS; CID      **Genenames** KIF4A

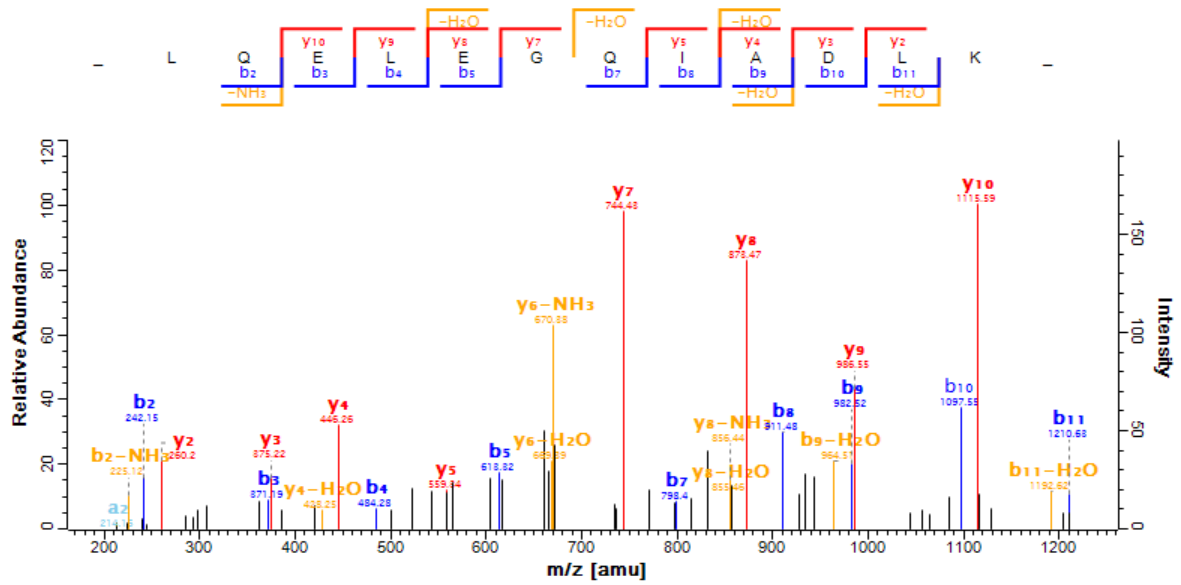

**Protein Group ID:** 1370

**Protein Accession Numbers:** O95399-2; Q5H8X8; O95399

**Gene Names:** UTS2

**Peptide Sequence:** LTPEELER

**Total Number of Spectra:** 26

**Number of Replicates (out of 10):** 10

**Best Match Score:** 151.29

**Best Match Posterior Error Probability:** 0.0014204

**Best Match Spectrum:**

**Scan number** 2512      **Raw file** OGE-Mock-Frac6  
**Method** ITMS; CID      **Genenames** UTS2

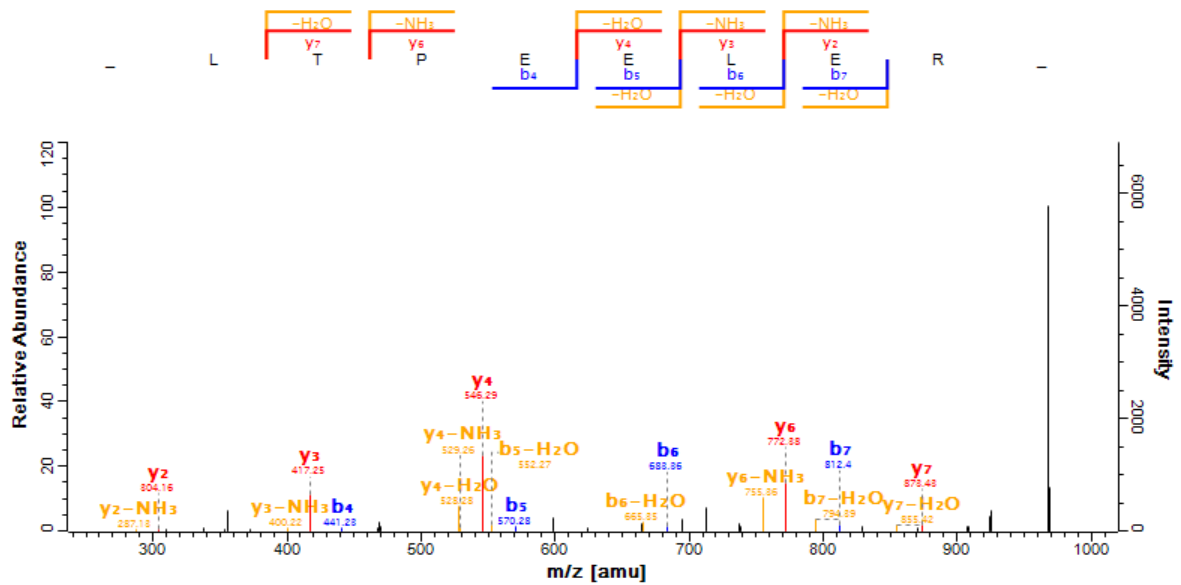

**Protein Group ID:** 1377  
**Protein Accession Numbers:** O95613; O95613-2  
**Gene Names:** PCNT  
**Peptide Sequence:** NLESHHQA AIEK  
**Total Number of Spectra:** 1  
**Number of Replicates (out of 10):** 1  
**Best Match Score:** 103.08  
**Best Match Posterior Error Probability:** 0.0037629  
**Best Match Spectrum:**

**Scan number** 6260      **Raw file** Prt-OGE-Batch3-Mock-Frac7  
**Method** ITMS; CID      **Genenames** PCNT

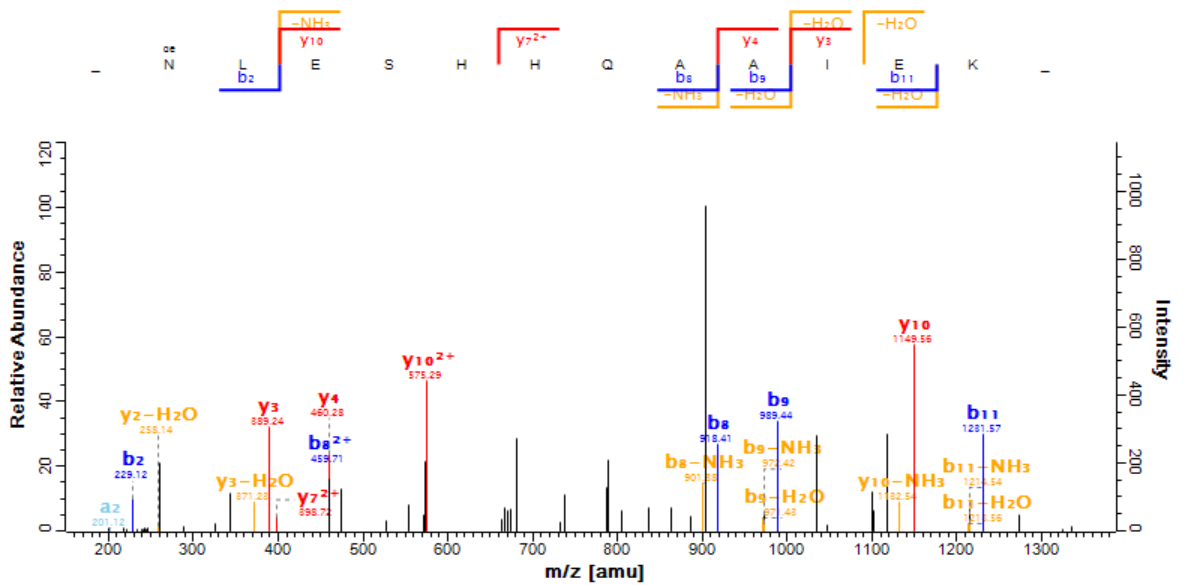

**Protein Group ID:** 1383

**Protein Accession Numbers:** O95782; O95782-2

**Gene Names:** AP2A1

**Peptide Sequence:** LLGFGSALLDNDNVDNPNPNFVVGAGIIQTK

**Total Number of Spectra:** 1

**Number of Replicates (out of 10):** 1

**Best Match Score:** 68.689

**Best Match Posterior Error Probability:** 4.28E-05

**Best Match Spectrum:**

**Scan number** 7679      **Raw file** 20100930-KD-Batch5-Prt-OGE-WT-Frac12  
**Method** ITMS; CID      **Genenames** AP2A1

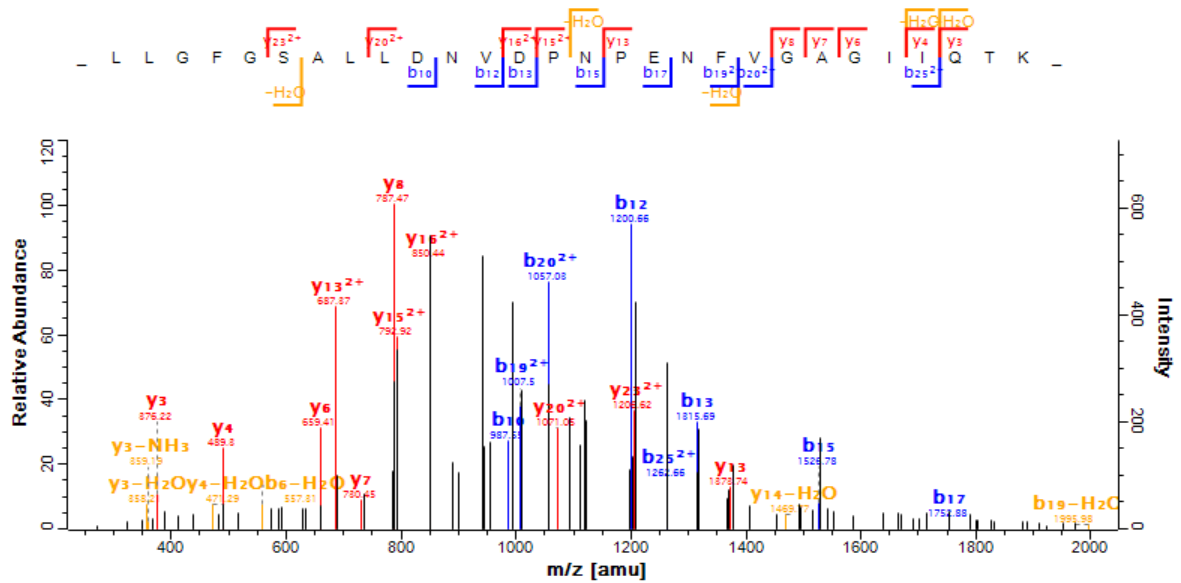

**Protein Group ID:** 1396  
**Protein Accession Numbers:** O95989  
**Gene Names:** NUDT3  
**Peptide Sequence:** WIVPGGGMEPEEEPSVAAR  
**Total Number of Spectra:** 1  
**Number of Replicates (out of 10):** 1  
**Best Match Score:** 95.954  
**Best Match Posterior Error Probability:** 9.04E-05  
**Best Match Spectrum:**

**Scan number** 3742      **Raw file** Prt-OGE-Batch3-WT-Frac12  
**Method** ITMS; CID      **Genenames** NUDT3

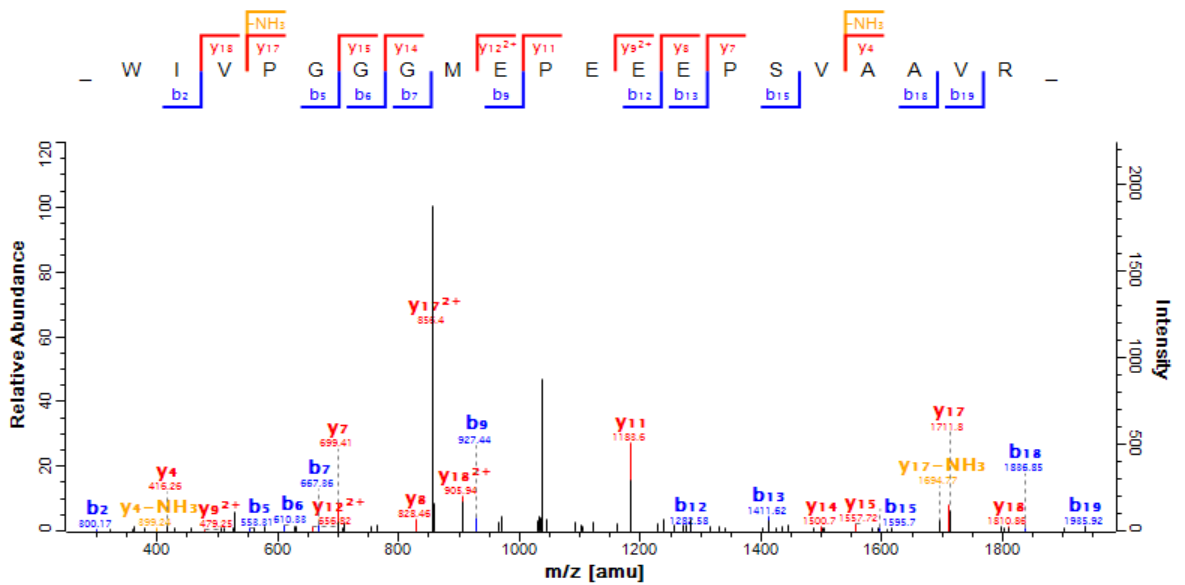

**Protein Group ID:** 1430  
**Protein Accession Numbers:** P02795; H3BSP9  
**Gene Names:** MT2A  
**Peptide Sequence:** MDPNCSCAAGDSCTCAGSCK  
**Total Number of Spectra:** 17  
**Number of Replicates (out of 10):** 7  
**Best Match Score:** 223.54  
**Best Match Posterior Error Probability:** 1.29E-71  
**Best Match Spectrum:**

**Scan number** 1589      **Raw file** 20100927-KD-Batch4-Prt-OGE-WT-Frac19  
**Method** ITMS; CID      **Genenames** MT2A

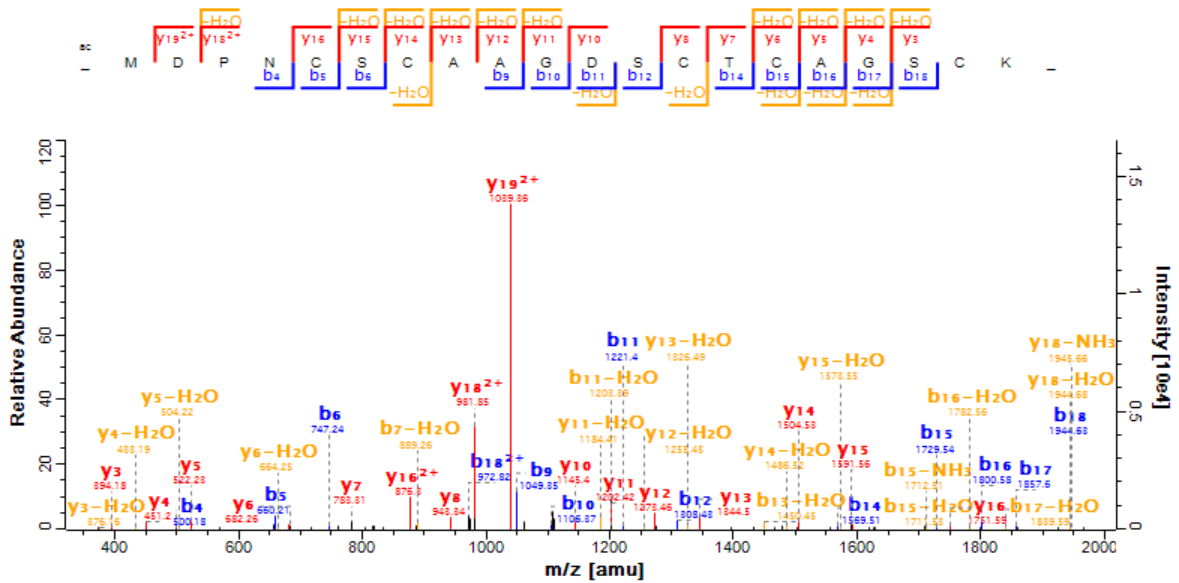



**Protein Group ID:** 1435  
**Protein Accession Numbers:** P03973  
**Gene Names:** SLPI  
**Peptide Sequence:** CLDPVDTPNPTR  
**Total Number of Spectra:** 1  
**Number of Replicates (out of 10):** 1  
**Best Match Score:** 102.97  
**Best Match Posterior Error Probability:** 0.00034024  
**Best Match Spectrum:**

**Scan number** 1911      **Raw file** 20100927-KD-Batch4-Prt-OGE-WT-Frac22  
**Method** ITMS; CID      **Genenames** SLPI

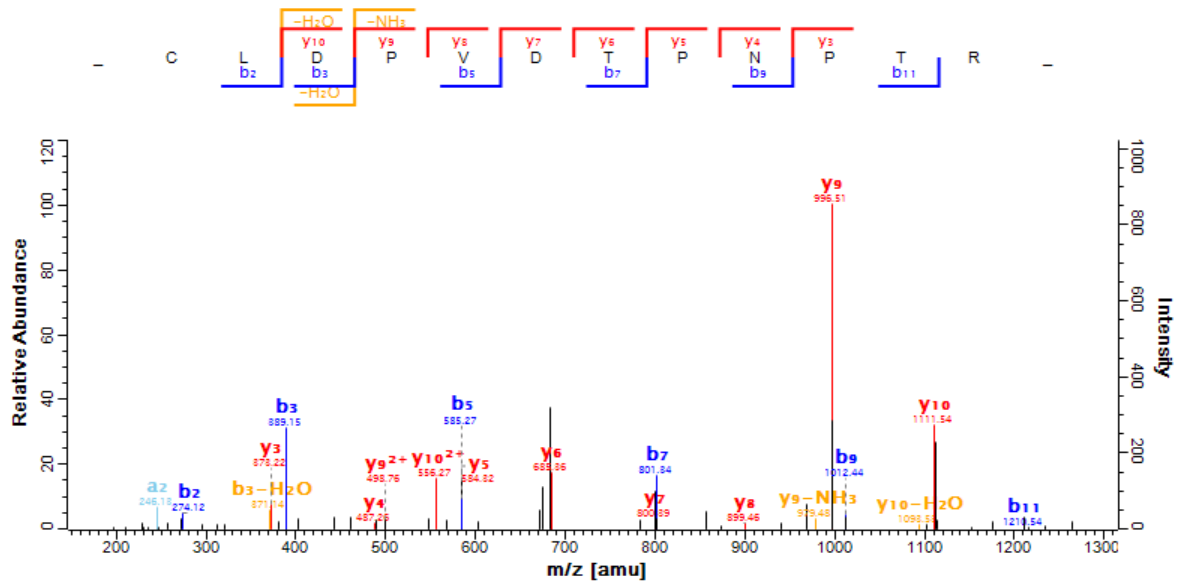

**Protein Group ID:** 1437  
**Protein Accession Numbers:** P04066  
**Gene Names:** FUCA1  
**Peptide Sequence:** DLV<sup>9</sup>GELGTALR  
**Total Number of Spectra:** 1  
**Number of Replicates (out of 10):** 1  
**Best Match Score:** 143.97  
**Best Match Posterior Error Probability:** 1.41E-05  
**Best Match Spectrum:**

**Scan number** 5595      **Raw file** Prt-OGE-Batch3--Mock-Frac12  
**Method** ITMS; CID      **Genenames** FUCA1

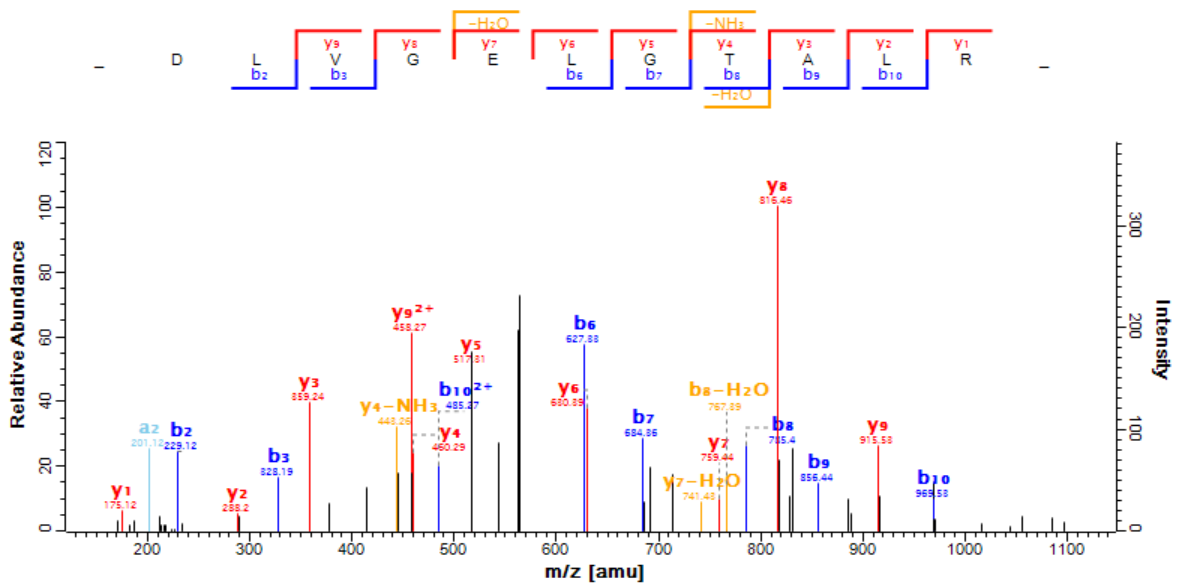

**Protein Group ID:** 1457  
**Protein Accession Numbers:** P05106  
**Gene Names:** ITGB3  
**Peptide Sequence:** WDTANNPLYK  
**Total Number of Spectra:** 3  
**Number of Replicates (out of 10):** 3  
**Best Match Score:** 101.38  
**Best Match Posterior Error Probability:** 0.0059329  
**Best Match Spectrum:**

**Scan number** 3142      **Raw file** OGE-Mock-Frac11  
**Method** ITMS; CID      **Genenames** ITGB3

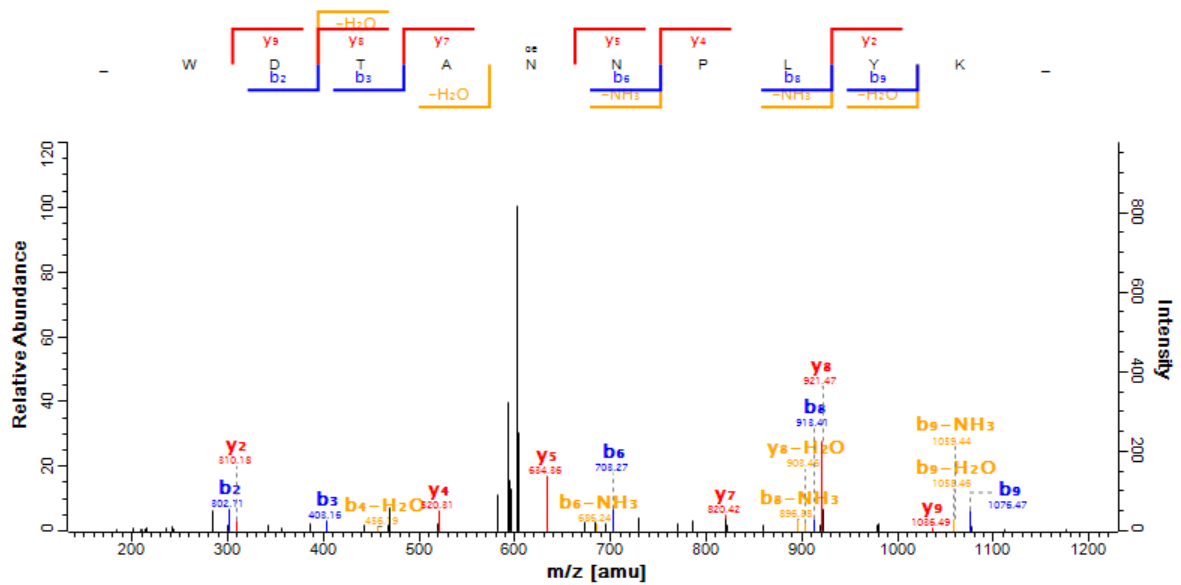

**Protein Group ID:** 1485

**Protein Accession Numbers:** P06899; P23527; P33778; Q16778; Q8N257; Q6DN03; Q6DRA6

**Gene Names:**

HIST1H2BJ; HIST1H2BO; HIST1H2BB; HIST2H2BE; HIST3H2BB; HIST2H2BC; HIST2H2BD

**Peptide Sequence:** KESYSIYVYK

**Total Number of Spectra:** 4

**Number of Replicates (out of 10):** 2

**Best Match Score:** 90.913

**Best Match Posterior Error Probability:** 0.0026308

**Best Match Spectrum:**

**Scan number** 2137      **Raw file** 20100930-KD-Batch5-Prt-OGE-WT-Frac18  
**Method** ITMS: CID      **Genenames** HIST1H2BJ; HIST1H2BO; HIST1H2BB; HIST2H2BE; HIST3H2BB; HIST2H2BC; HIST2H2BD

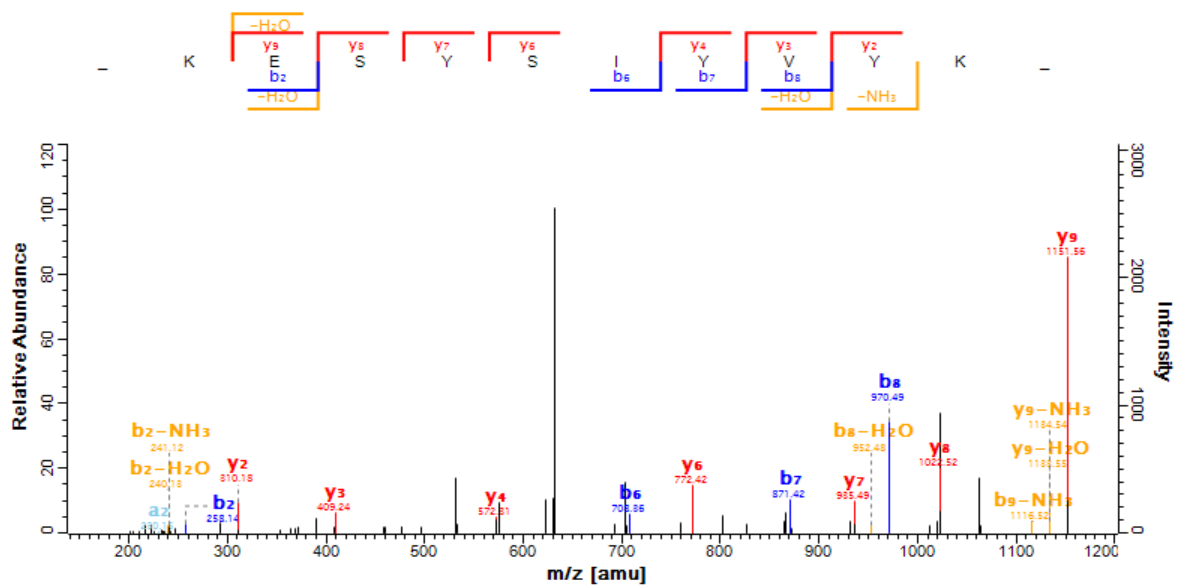

**Protein Group ID:** 1490  
**Protein Accession Numbers:** P07205  
**Gene Names:** PGK2  
**Peptide Sequence:** ACANPAGSVILLLLENLR  
**Total Number of Spectra:** 1  
**Number of Replicates (out of 10):** 1  
**Best Match Score:** 87.932  
**Best Match Posterior Error Probability:** 0.00052937  
**Best Match Spectrum:**

**Scan number** 6409      **Raw file** Prt-OGE-Batch2-Mock-Frac1 8  
**Method** ITMS; CID      **Genenames** PGK2

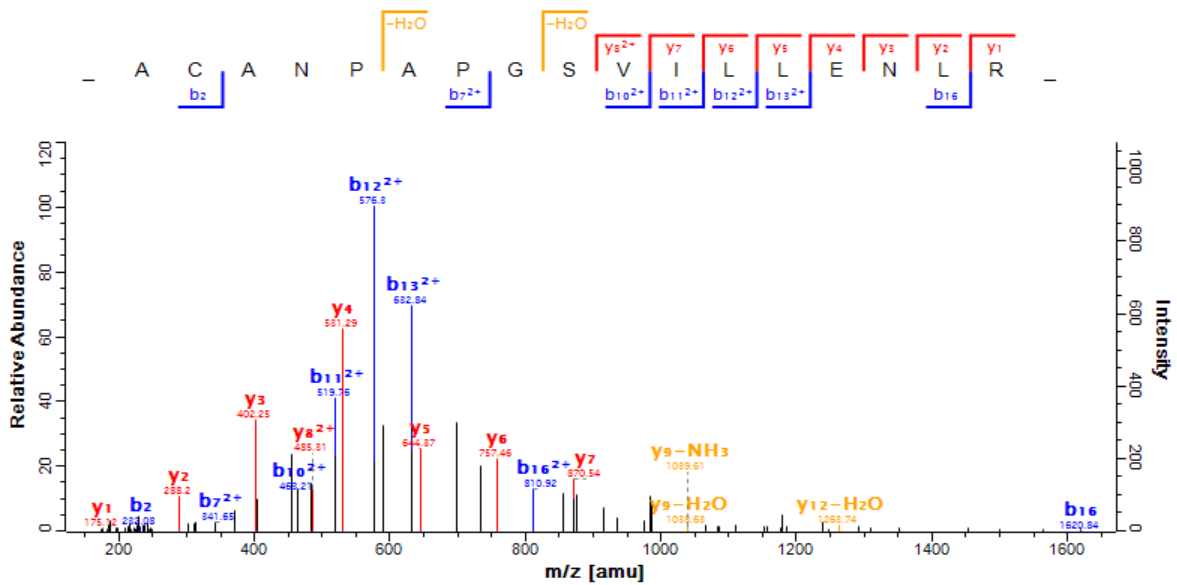

**Protein Group ID:** 1548  
**Protein Accession Numbers:** P0C7P0  
**Gene Names:** CISD3  
**Peptide Sequence:** TPIKVELVAGK  
**Total Number of Spectra:** 2  
**Number of Replicates (out of 10):** 2  
**Best Match Score:** 147.62  
**Best Match Posterior Error Probability:** 4.67E-05  
**Best Match Spectrum:**

**Scan number** 2519      **Raw file** 20100917-KD-Batch5-Prt-OGE-Mock-Frac23  
**Method** ITMS; CID      **Genenames** CISD3

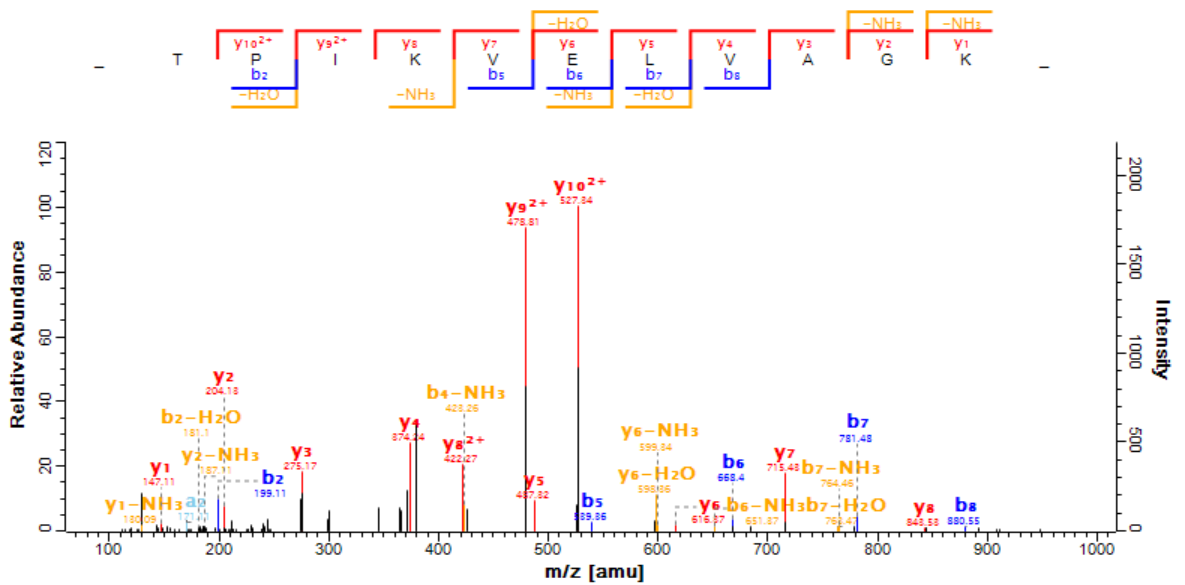

**Protein Group ID:** 1552  
**Protein Accession Numbers:** P10398  
**Gene Names:** ARAF  
**Peptide Sequence:** PLFPQILATIELLQR  
**Total Number of Spectra:** 3  
**Number of Replicates (out of 10):** 3  
**Best Match Score:** 164.53  
**Best Match Posterior Error Probability:** 1.80E-11  
**Best Match Spectrum:**

**Scan number** 8490      **Raw file** 20100930-KD-Batch5-Prt-OGE-WT-Frac20  
**Method** ITMS; CID      **Genenames** ARAF

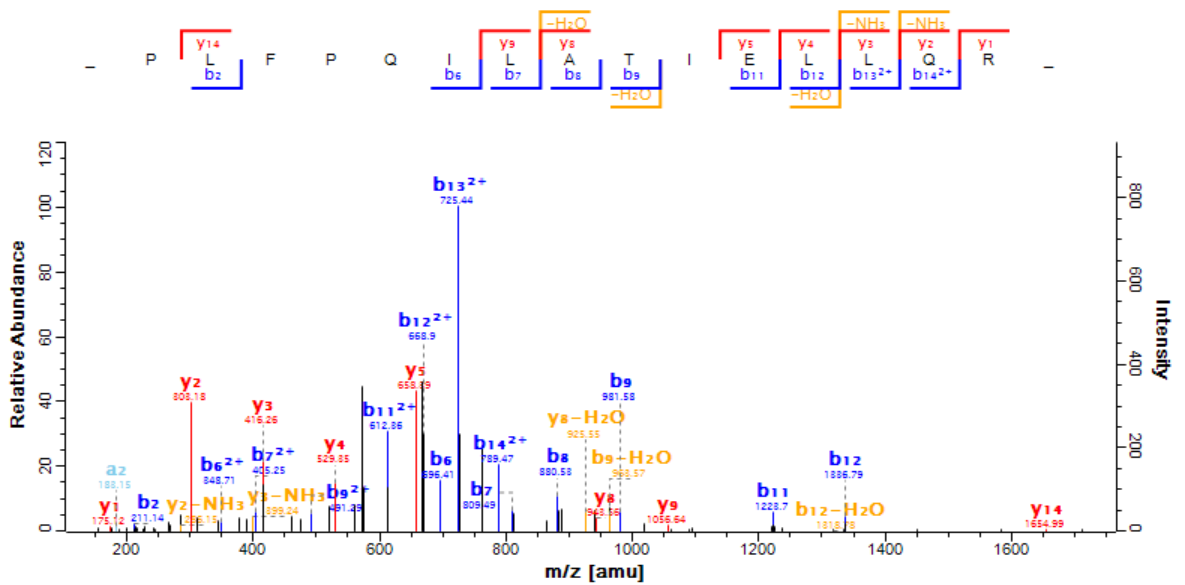

**Protein Group ID:** 1553  
**Protein Accession Numbers:** P10412  
**Gene Names:** HIST1H1E  
**Peptide Sequence:** SETAPAAPAAPAEK  
**Total Number of Spectra:** 28  
**Number of Replicates (out of 10):** 9  
**Best Match Score:** 147.12  
**Best Match Posterior Error Probability:** 2.66E-07  
**Best Match Spectrum:**

**Scan number** 1390      **Raw file** 20100930-KD-Batch5-Prt-OGE-WT-Frac14  
**Method** ITMS; CID      **Genenames** HIST1H1E

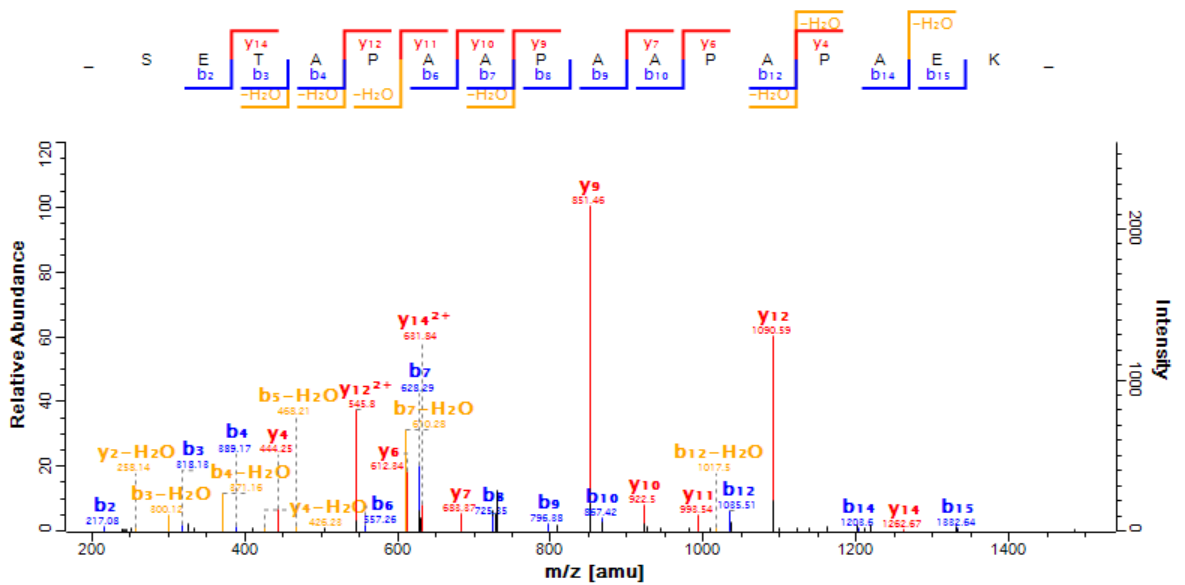



**Protein Group ID:** 1567  
**Protein Accession Numbers:** P11166  
**Gene Names:** SLC2A1  
**Peptide Sequence:** TFDEIASGFR  
**Total Number of Spectra:** 1  
**Number of Replicates (out of 10):** 1  
**Best Match Score:** 117.02  
**Best Match Posterior Error Probability:** 0.0001734  
**Best Match Spectrum:**

**Scan number** 2716      **Raw file** Prt-OGE-Batch3-WT-Frac1  
**Method** ITMS; CID      **Genenames** SLC2A1

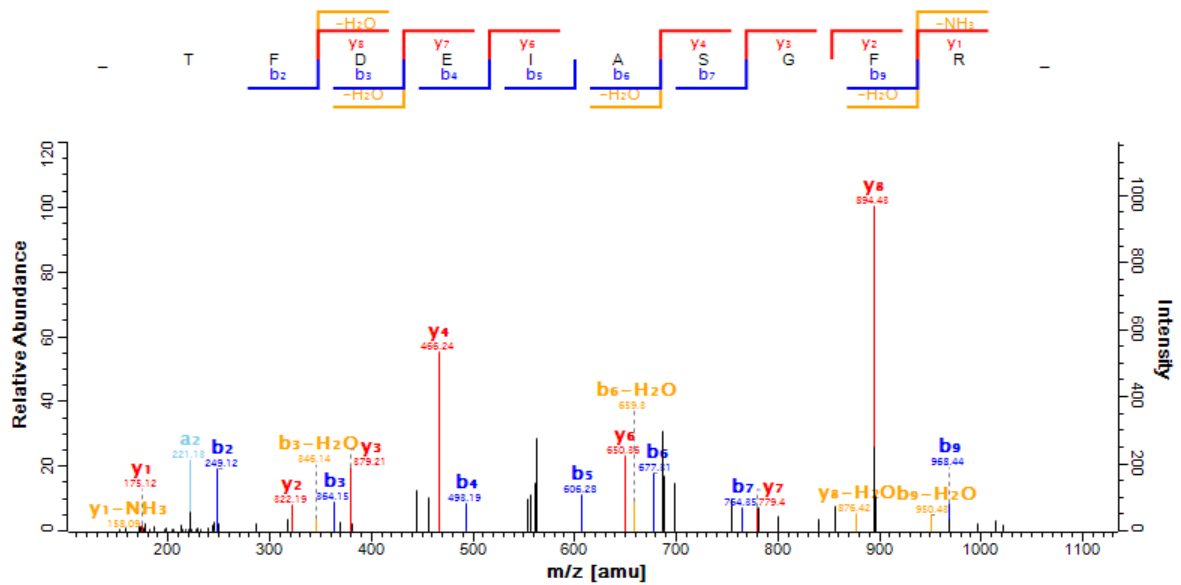

**Protein Group ID:** 1570  
**Protein Accession Numbers:** P11182  
**Gene Names:** DBT  
**Peptide Sequence:** SYLENPAFMLLDLK  
**Total Number of Spectra:** 3  
**Number of Replicates (out of 10):** 3  
**Best Match Score:** 142.1  
**Best Match Posterior Error Probability:** 9.04E-07  
**Best Match Spectrum:**

**Scan number** 6435      **Raw file** OGE-Mock-Frac13  
**Method** ITMS; CID      **Genenames** DBT

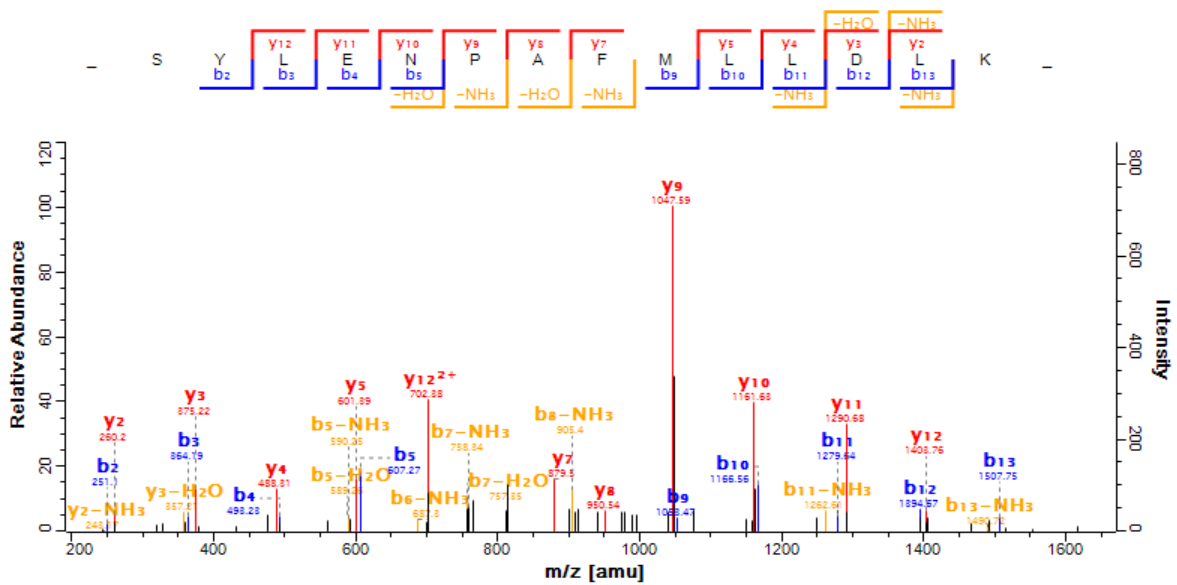

**Protein Group ID:** 1572  
**Protein Accession Numbers:** P11217; P11217-2  
**Gene Names:** PYGM  
**Peptide Sequence:** VAIQLNDTHPSLAIPELMR  
**Total Number of Spectra:** 1  
**Number of Replicates (out of 10):** 1  
**Best Match Score:** 121.82  
**Best Match Posterior Error Probability:** 2.12E-05  
**Best Match Spectrum:**

**Scan number** 4772      **Raw file** Prt-OGE-Batch2-WT-Frac15  
**Method** ITMS; CID      **Genenames** PYGM

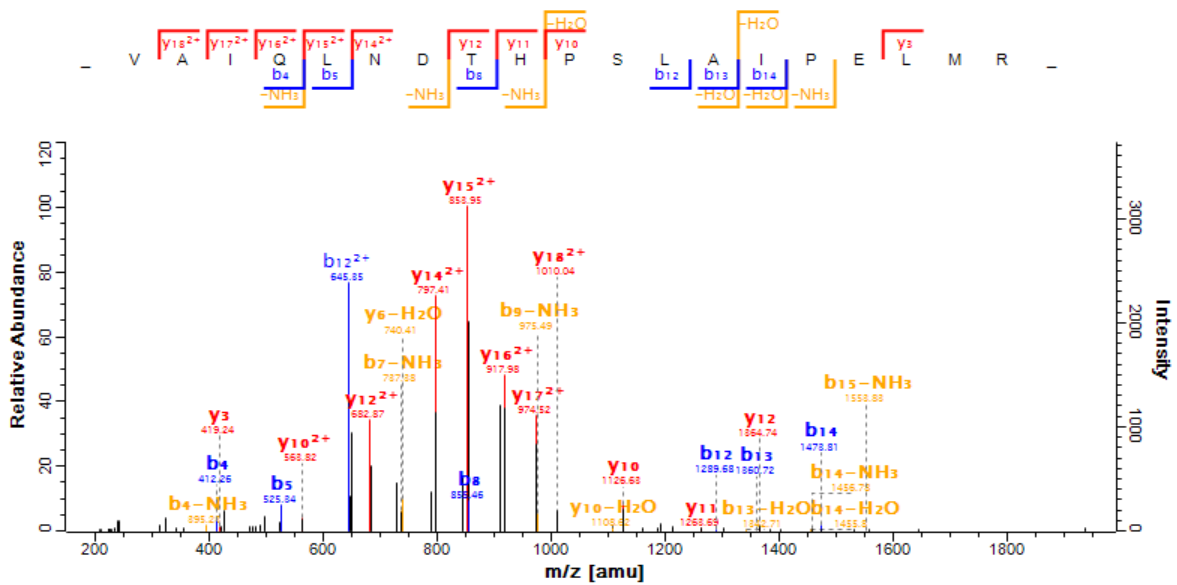

**Protein Group ID:** 1573  
**Protein Accession Numbers:** P11279  
**Gene Names:** LAMP1  
**Peptide Sequence:** TVESITDIR  
**Total Number of Spectra:** 7  
**Number of Replicates (out of 10):** 5  
**Best Match Score:** 126.31  
**Best Match Posterior Error Probability:** 0.00029395  
**Best Match Spectrum:**

**Scan number** 2385      **Raw file** OGE-Mock-Frac18  
**Method** ITMS; CID      **Genenames** LAMP1

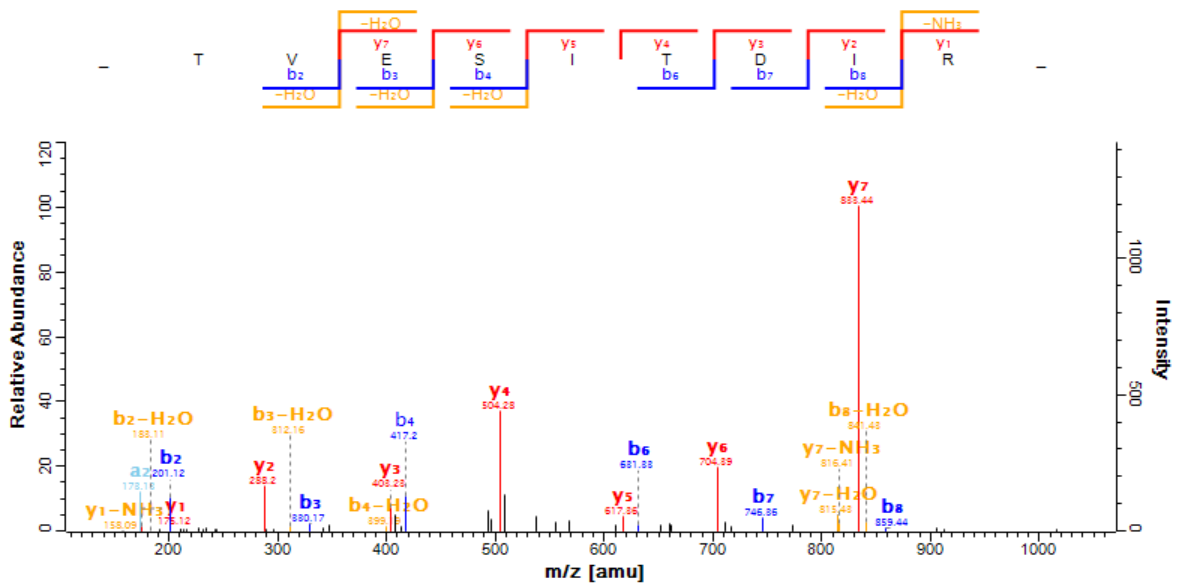

**Protein Group ID:** 1574  
**Protein Accession Numbers:** P11387  
**Gene Names:** TOP1  
**Peptide Sequence:** SGDHLHNSQIEADFR  
**Total Number of Spectra:** 2  
**Number of Replicates (out of 10):** 2  
**Best Match Score:** 75.669  
**Best Match Posterior Error Probability:** 0.0014047  
**Best Match Spectrum:**

**Scan number** 2527      **Raw file** 20100930-KD-Batch5-Prt-OGE-WT-Frac17  
**Method** ITMS; CID      **Genenames** TOP1

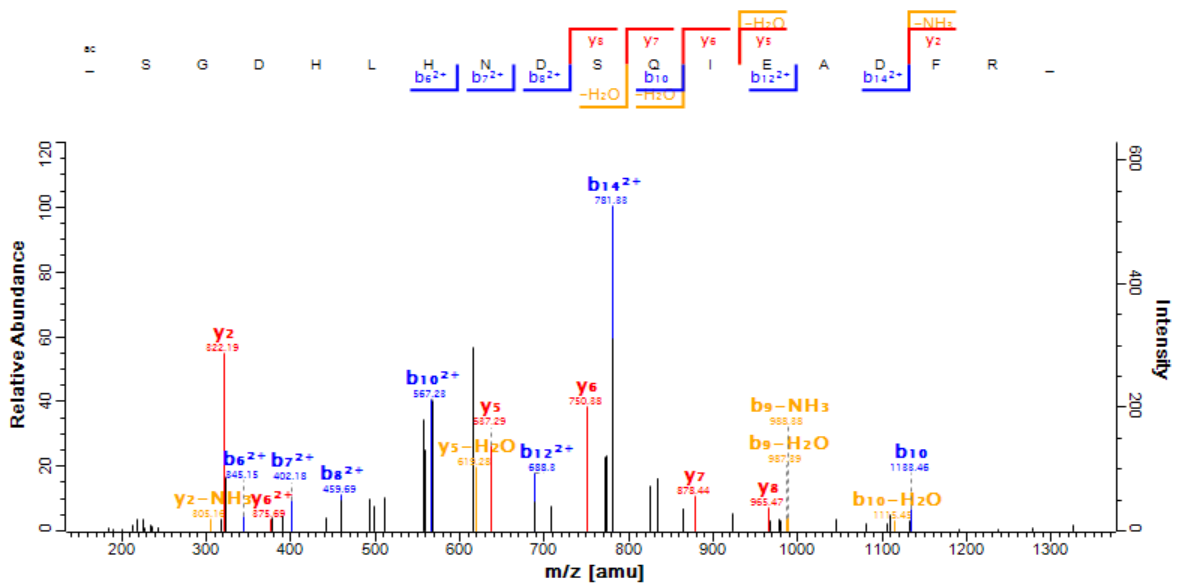

**Protein Group ID:** 1575

**Protein Accession Numbers:** P11388-4; P11388-3; P11388-2; P11388

**Gene Names:** TOP2A

**Peptide Sequence:** MEVSPLQPVNENMQVNEKIKK

**Total Number of Spectra:** 1

**Number of Replicates (out of 10):** 1

**Best Match Score:** 81.317

**Best Match Posterior Error Probability:** 0.00086178

**Best Match Spectrum:**

**Scan number** 5978      **Raw file** Prt-OGE-Batch2-WT-Frac21  
**Method** ITMS; CID      **Genenames** TOP2A

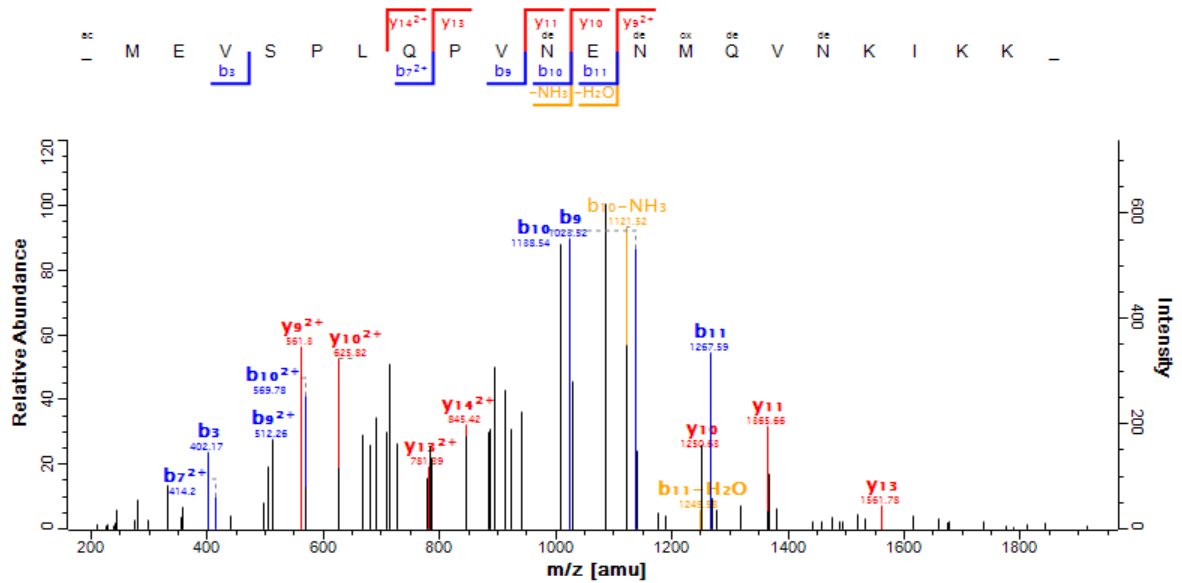

**Protein Group ID:** 1583

**Protein Accession Numbers:** P12074; Q5T8I0

**Gene Names:** COX6A1;COX6A1P2

**Peptide Sequence:** TKPFPWGDGNHTLFHNPHVNP LPTGYEDE

**Total Number of Spectra:** 13

**Number of Replicates (out of 10):** 8

**Best Match Score:** 88.504

**Best Match Posterior Error Probability:** 2.52E-09

**Best Match Spectrum:**

**Scan number** 4659      **Raw file** 20100917-KD-Batch5-Prt-OGE-Mock-Frac16  
**Method** ITMS; CID      **Genenames** COX6A1;COX6A1P2

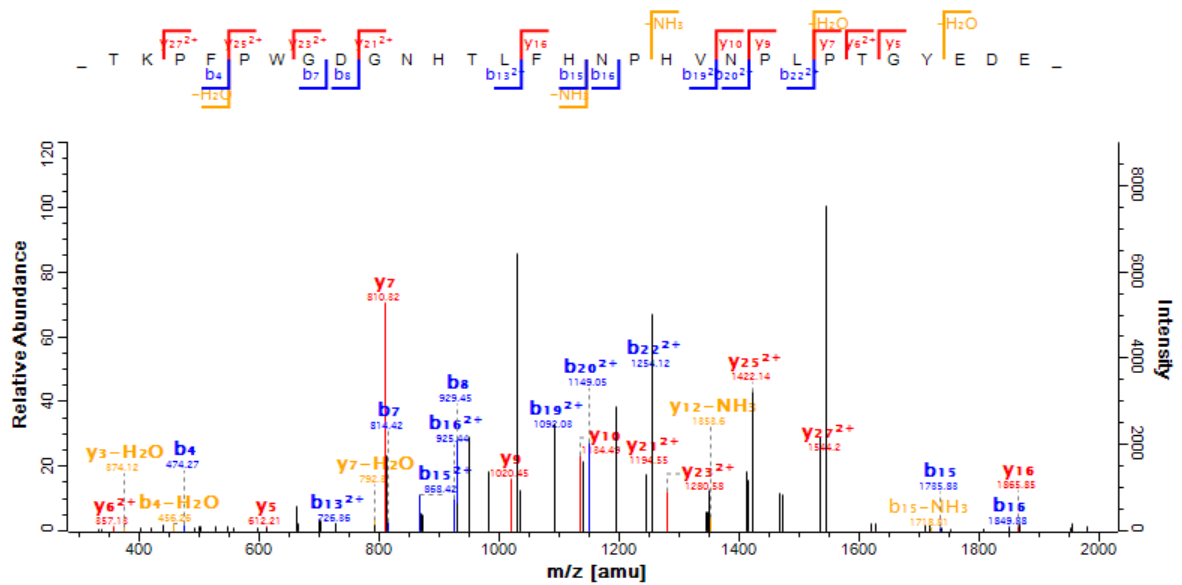

**Protein Group ID:** 1598

**Protein Accession Numbers:** P13498

**Gene Names:** CYBA

**Peptide Sequence:** KKPSEEEA VAAGPPGGPQVNPIPVTVDEVV

**Total Number of Spectra:** 1

**Number of Replicates (out of 10):** 1

**Best Match Score:** 78.128

**Best Match Posterior Error Probability:** 1.43E-06

**Best Match Spectrum:**

**Scan number** 3441      **Raw file** Prt-OGE-Batch3-WT-Frac1  
**Method** ITMS; CID      **Genenames** CYBA

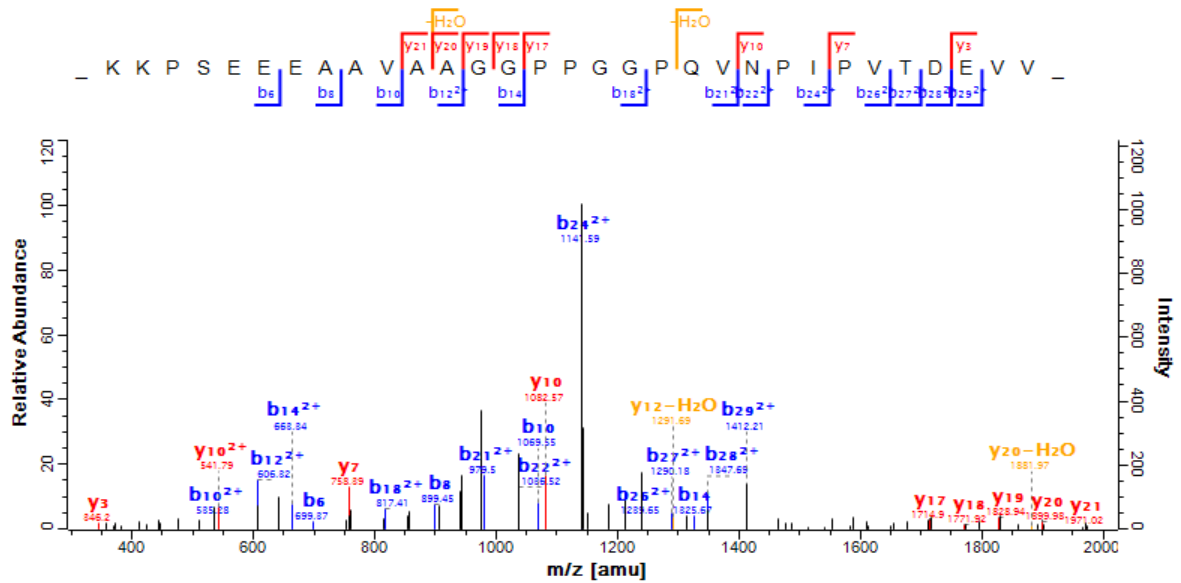



**Protein Group ID:** 1599  
**Protein Accession Numbers:** P13501  
**Gene Names:** CCL5  
**Peptide Sequence:** CSNPAAVVFVTR  
**Total Number of Spectra:** 5  
**Number of Replicates (out of 10):** 3  
**Best Match Score:** 134.49  
**Best Match Posterior Error Probability:** 3.10E-05  
**Best Match Spectrum:**

|                    |           |                  |                          |
|--------------------|-----------|------------------|--------------------------|
| <b>Scan number</b> | 2690      | <b>Raw file</b>  | Prt-OGE-Batch2-WT-Frac22 |
| <b>Method</b>      | ITMS; CID | <b>Genenames</b> | CCL5                     |

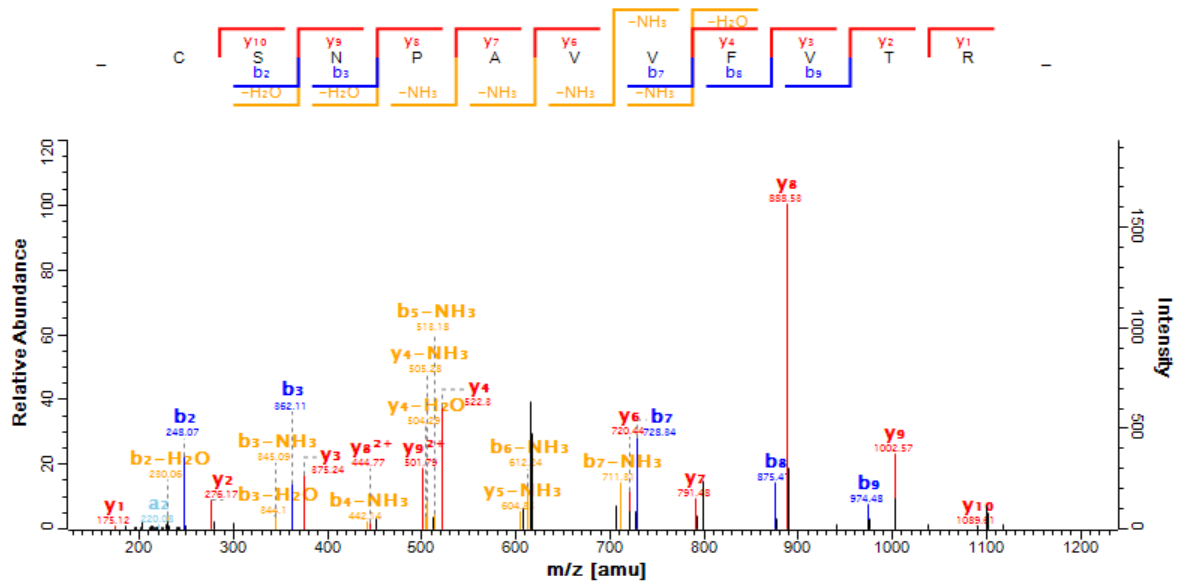

**Protein Group ID:** 1608

**Protein Accession Numbers:** P13928; Q5T2P8; B4DKI1; Q5VTM3; Q5T2P7

**Gene Names:** ANXA8;ANXA8L1

**Peptide Sequence:** DDVSSFVDPGLALQDAQDLYAAGEK

**Total Number of Spectra:** 8

**Number of Replicates (out of 10):** 6

**Best Match Score:** 151.89

**Best Match Posterior Error Probability:** 3.09E-30

**Best Match Spectrum:**

**Scan number** 6849      **Raw file** 20100927-KD-Batch4-Prt-OGE-WT-Frac10  
**Method** ITMS; CID      **Genenames** ANXA8;ANXA8L1

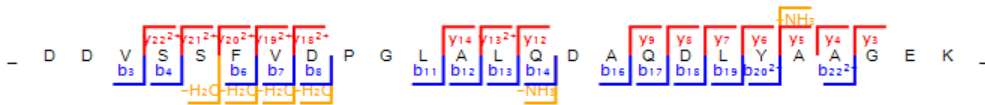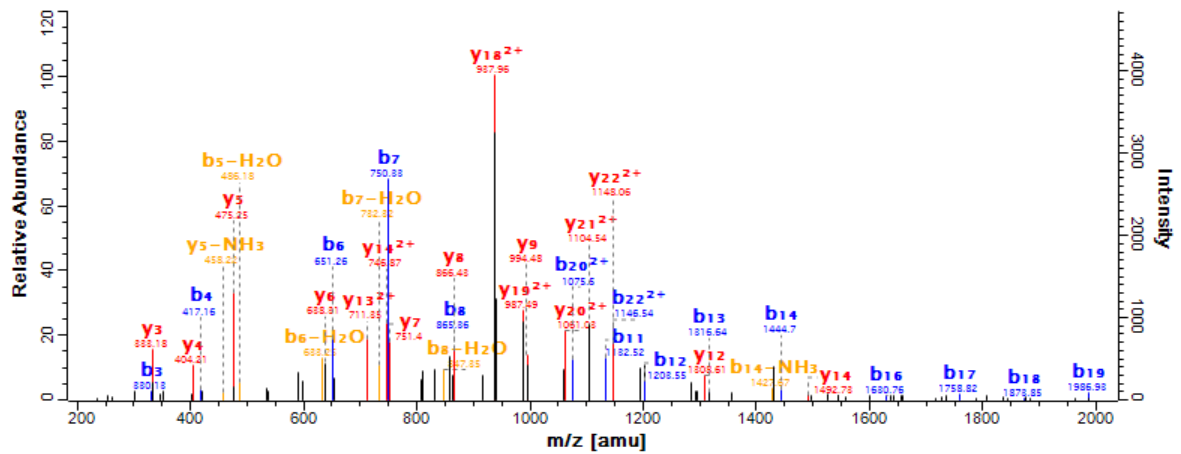

**Protein Group ID:** 1641  
**Protein Accession Numbers:** P16402  
**Gene Names:** HIST1H1D  
**Peptide Sequence:** SETAPLAPTIPAPAEK  
**Total Number of Spectra:** 15  
**Number of Replicates (out of 10):** 5  
**Best Match Score:** 119.96  
**Best Match Posterior Error Probability:** 0.0001049  
**Best Match Spectrum:**

**Scan number** 4523      **Raw file** Prt-OGE-Batch2-Mock-Frac23  
**Method** ITMS; CID      **Genenames** HIST1H1D

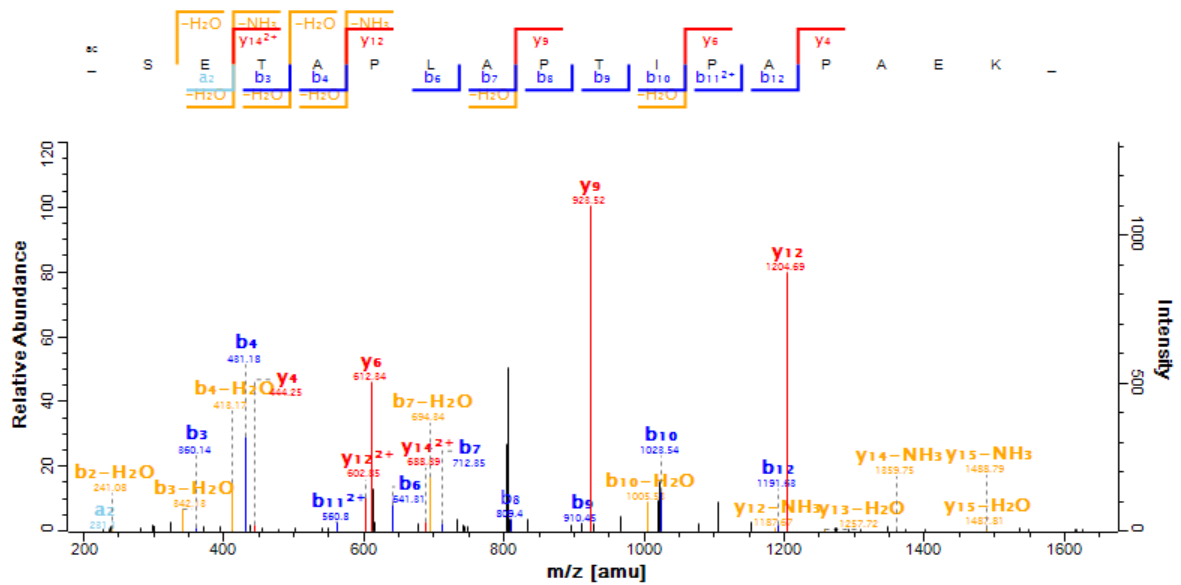

**Protein Group ID:** 1643  
**Protein Accession Numbers:** P16455  
**Gene Names:** MGMT  
**Peptide Sequence:** VVCSSGAVGNYSGGLAVK  
**Total Number of Spectra:** 2  
**Number of Replicates (out of 10):** 2  
**Best Match Score:** 131.25  
**Best Match Posterior Error Probability:** 1.56E-05  
**Best Match Spectrum:**

**Scan number** 2820      **Raw file** 20100914-KD-Batch4-Prt-OGE-Mock-Frac19  
**Method** ITMS; CID      **Genenames** MGMT

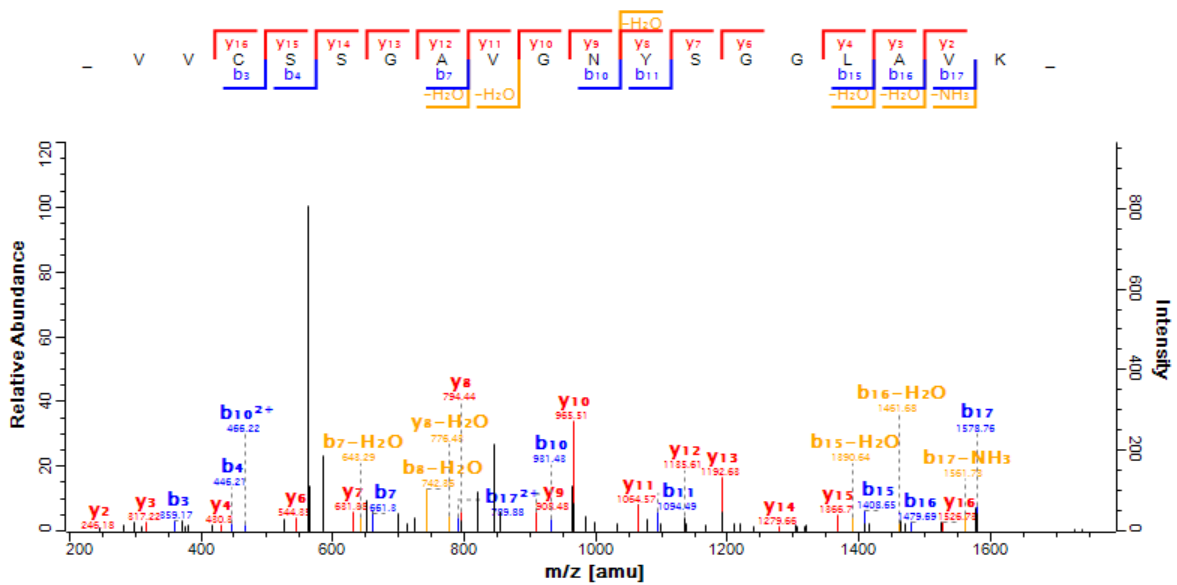

**Protein Group ID:** 1648  
**Protein Accession Numbers:** P17066; P48741  
**Gene Names:** HSPA6;HSPA7  
**Peptide Sequence:** VEILANDQGNR  
**Total Number of Spectra:** 257  
**Number of Replicates (out of 10):** 10  
**Best Match Score:** 231.7  
**Best Match Posterior Error Probability:** 2.94E-225  
**Best Match Spectrum:**

**Scan number** 2018      **Raw file** OGE-WT-Frac8  
**Method** ITMS; CID      **Genenames** HSPA6;HSPA7

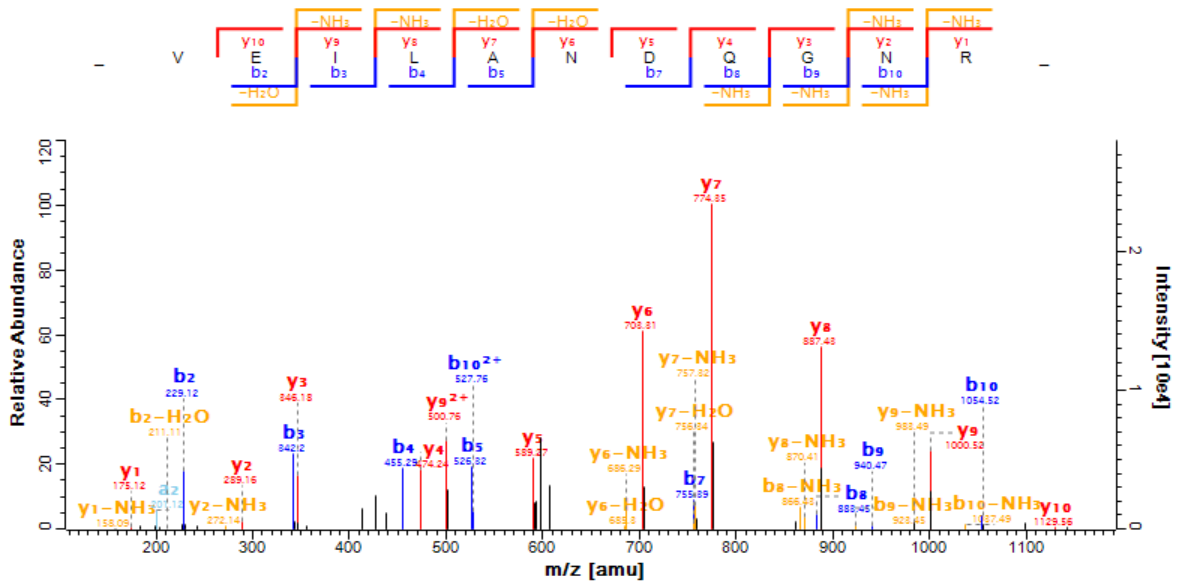

**Protein Group ID:** 1655  
**Protein Accession Numbers:** P17858; P17858-2  
**Gene Names:** PFKL  
**Peptide Sequence:** GQVQVEVGVWHDVAVGLGR  
**Total Number of Spectra:** 1  
**Number of Replicates (out of 10):** 1  
**Best Match Score:** 77.42  
**Best Match Posterior Error Probability:** 0.0013896  
**Best Match Spectrum:**

**Scan number** 4401      **Raw file** OGE-WT-Frac3  
**Method** ITMS; CID      **Genenames** PFKL

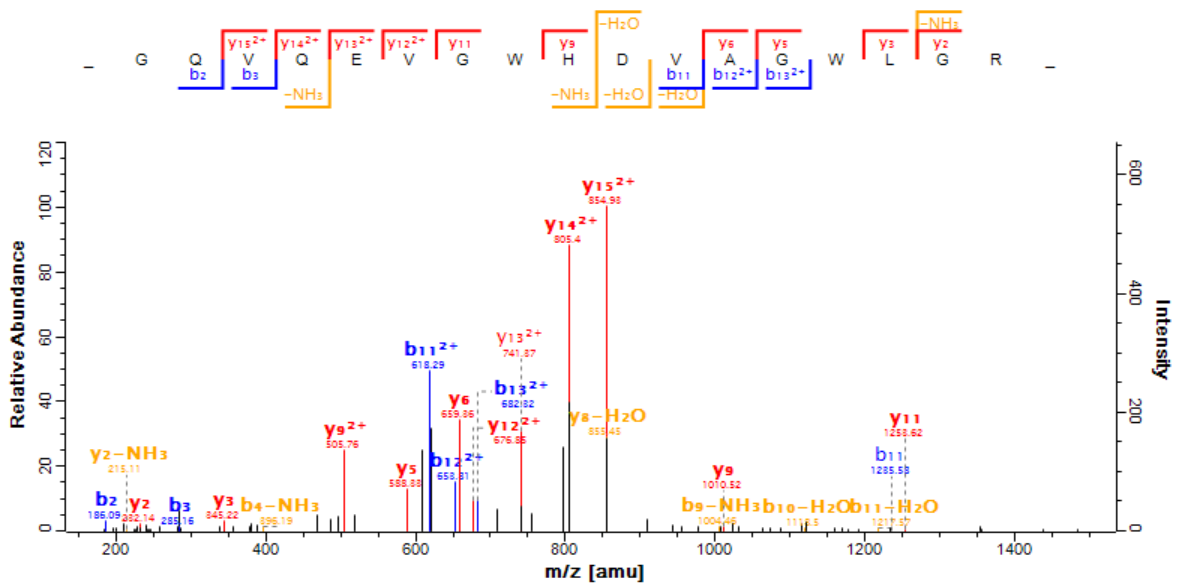

**Protein Group ID:** 1689  
**Protein Accession Numbers:** P21953; Q5T2J3  
**Gene Names:** BCKDHB  
**Peptide Sequence:** MNLFQSVTSALDNSLAK  
**Total Number of Spectra:** 3  
**Number of Replicates (out of 10):** 3  
**Best Match Score:** 122.08  
**Best Match Posterior Error Probability:** 0.00010788  
**Best Match Spectrum:**

**Scan number** 7543      **Raw file** 20100930-KD-Batch5-Prt-OGE-WT-Frac8  
**Method** ITMS; CID      **Genenames** BCKDHB

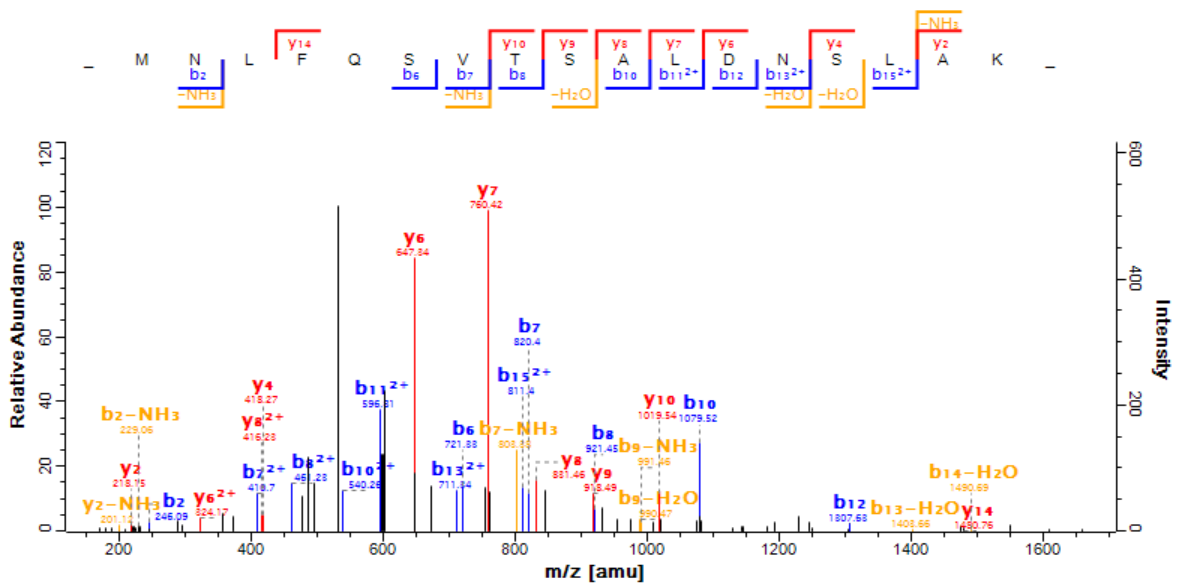

**Protein Group ID:** 1713  
**Protein Accession Numbers:** P23786  
**Gene Names:** CPT2  
**Peptide Sequence:** ALEDMFDALGK  
**Total Number of Spectra:** 2  
**Number of Replicates (out of 10):** 2  
**Best Match Score:** 140.14  
**Best Match Posterior Error Probability:** 6.42E-05  
**Best Match Spectrum:**

**Scan number** 4822      **Raw file** Prt-OGE-Batch2-WT-Frac17  
**Method** ITMS; CID      **Genenames** CPT2

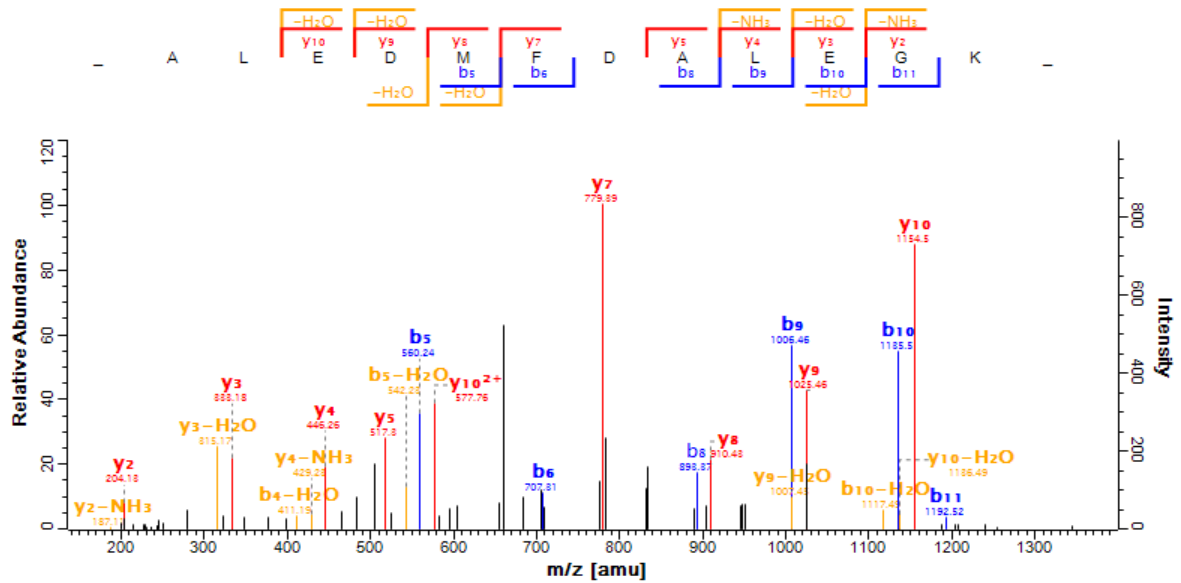



**Protein Group ID:** 1720  
**Protein Accession Numbers:** P24844; P24844-2  
**Gene Names:** MYL9  
**Peptide Sequence:** ELLTTMGDRFTDEEVDEMYR  
**Total Number of Spectra:** 1  
**Number of Replicates (out of 10):** 1  
**Best Match Score:** 124.68  
**Best Match Posterior Error Probability:** 1.88E-06  
**Best Match Spectrum:**

**Scan number** 4362      **Raw file** OGE-WT-Frac5  
**Method** ITMS; CID      **Genenames** MYL9

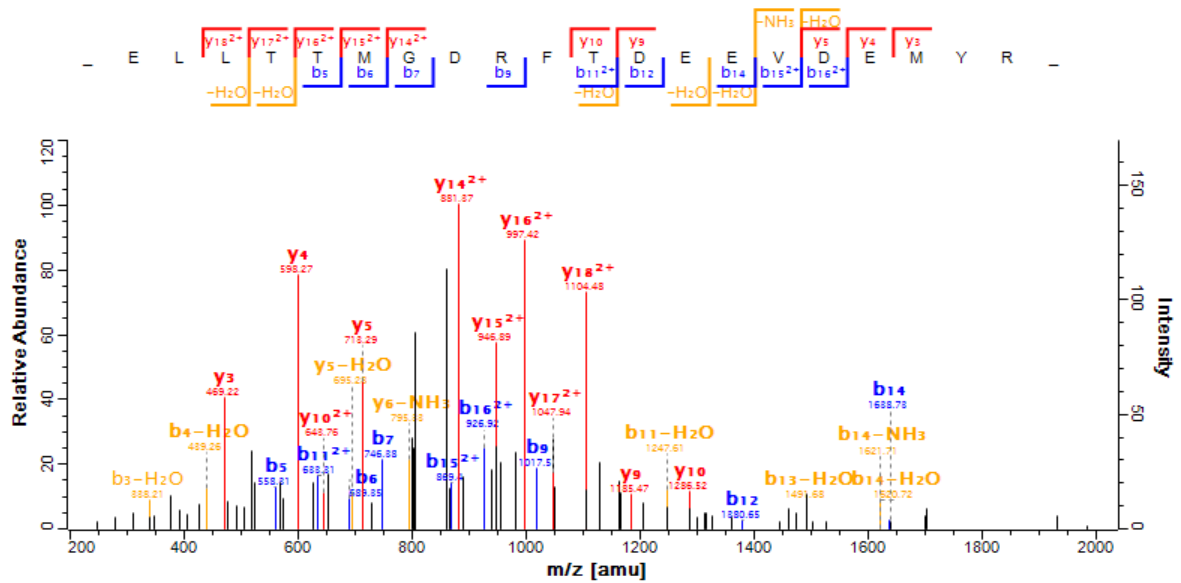

**Protein Group ID:** 1738  
**Protein Accession Numbers:** P26374  
**Gene Names:** CHML  
**Peptide Sequence:** AVLITDQSILK  
**Total Number of Spectra:** 1  
**Number of Replicates (out of 10):** 1  
**Best Match Score:** 90.913  
**Best Match Posterior Error Probability:** 0.00081989  
**Best Match Spectrum:**

**Scan number** 3607      **Raw file** Prt-OGE-Batch3-WT-Frac5  
**Method** ITMS; CID      **Genenames** CHML

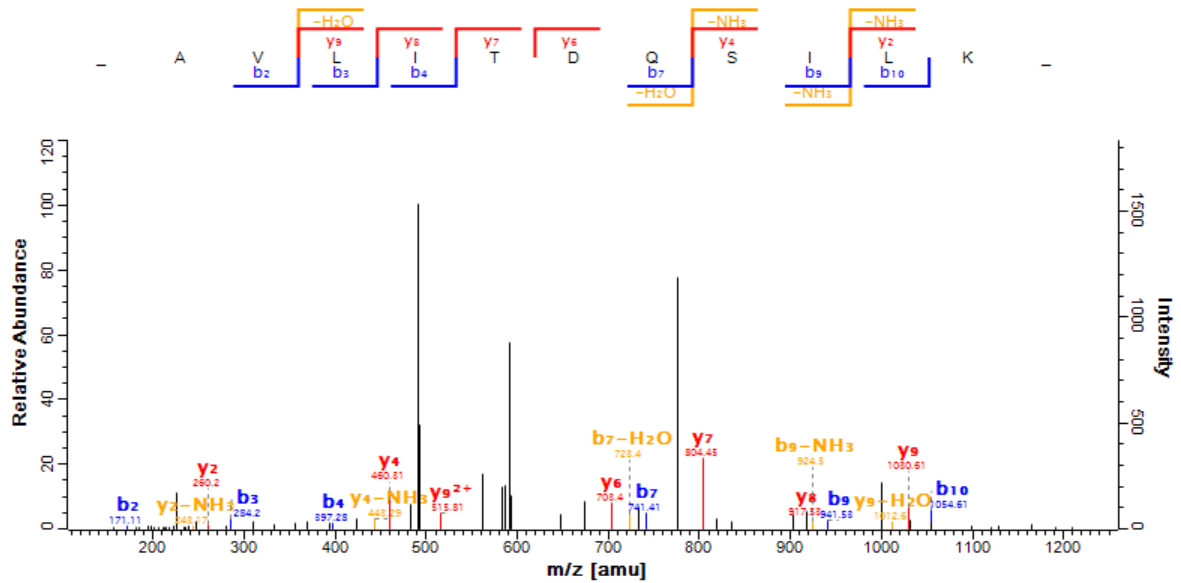

**Protein Group ID:** 1766  
**Protein Accession Numbers:** P29508; P29508-2  
**Gene Names:** SERPINB3  
**Peptide Sequence:** TYLFLQEYLDAIK  
**Total Number of Spectra:** 5  
**Number of Replicates (out of 10):** 4  
**Best Match Score:** 200.16  
**Best Match Posterior Error Probability:** 1.82E-24  
**Best Match Spectrum:**

**Scan number** 6933      **Raw file** 20100930-KD-Batch5-Prt-OGE-WT-Frac14  
**Method** ITMS; CID      **Genenames** SERPINB3

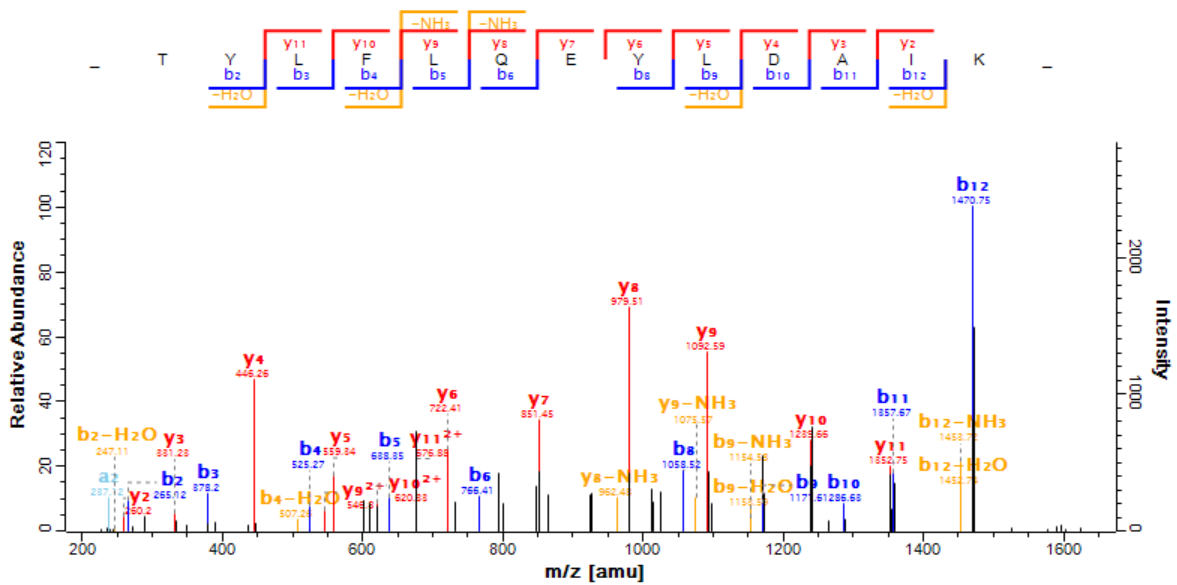

**Protein Group ID:** 1798  
**Protein Accession Numbers:** P31323  
**Gene Names:** PRKAR2B  
**Peptide Sequence:** NLDPEQMSQVLDAMFEK  
**Total Number of Spectra:** 1  
**Number of Replicates (out of 10):** 1  
**Best Match Score:** 84.208  
**Best Match Posterior Error Probability:** 0.00078724  
**Best Match Spectrum:**

**Scan number** 6362      **Raw file** OGE-WT-Frac6  
**Method** ITMS; CID      **Genenames** PRKAR2B

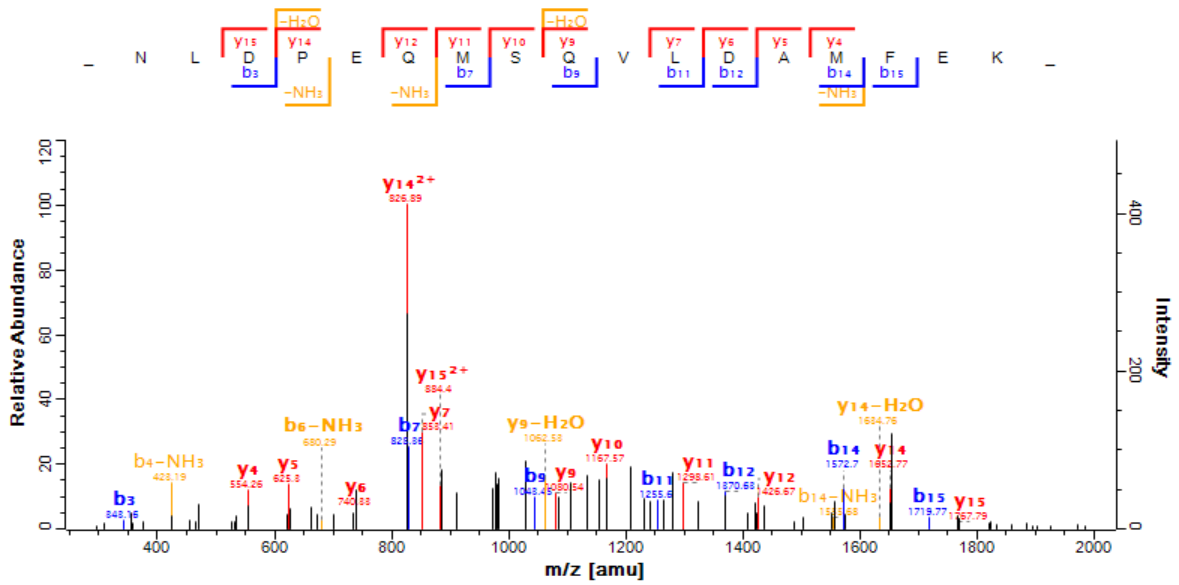

**Protein Group ID:** 1805  
**Protein Accession Numbers:** P31944  
**Gene Names:** CASP14  
**Peptide Sequence:** MAEAELVQEGK  
**Total Number of Spectra:** 1  
**Number of Replicates (out of 10):** 1  
**Best Match Score:** 95.094  
**Best Match Posterior Error Probability:** 0.00049374  
**Best Match Spectrum:**

**Scan number** 1358      **Raw file** Prt-OGE-Batch2-WT-Frac20  
**Method** ITMS; CID      **Genenames** CASP14

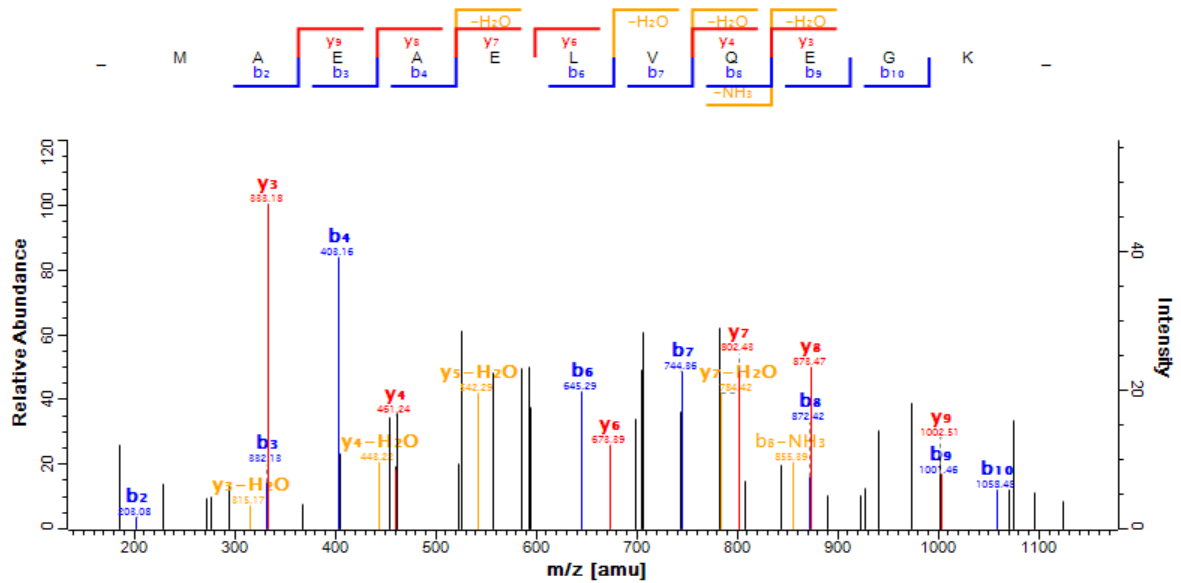

**Protein Group ID:** 1811

**Protein Accession Numbers:** P32320

**Gene Names:** CDA

**Peptide Sequence:** EFGTNWPVYMTKPDGTYIVMTVQELLPSFSGPEDLQK

**Total Number of Spectra:** 6

**Number of Replicates (out of 10):** 4

**Best Match Score:** 69.523

**Best Match Posterior Error Probability:** 5.27E-07

**Best Match Spectrum:**

**Scan number** 6872      **Raw file** Prt-OGE-Batch2-WT-Frac8  
**Method** ITMS; CID      **Genenames** CDA

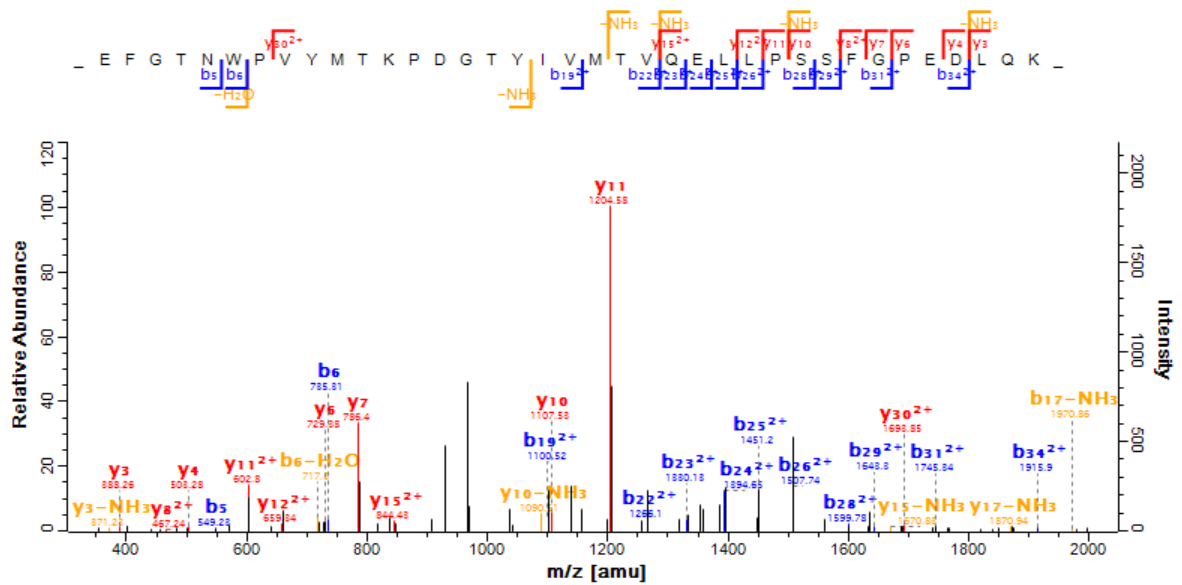

**Protein Group ID:** 1819  
**Protein Accession Numbers:** P33764  
**Gene Names:** S100A3  
**Peptide Sequence:** ELATWTPTEFR  
**Total Number of Spectra:** 1  
**Number of Replicates (out of 10):** 1  
**Best Match Score:** 101.39  
**Best Match Posterior Error Probability:** 0.00024992  
**Best Match Spectrum:**

**Scan number** 4493      **Raw file** OGE-Mock-Frac3  
**Method** ITMS; CID      **Genenames** S100A3

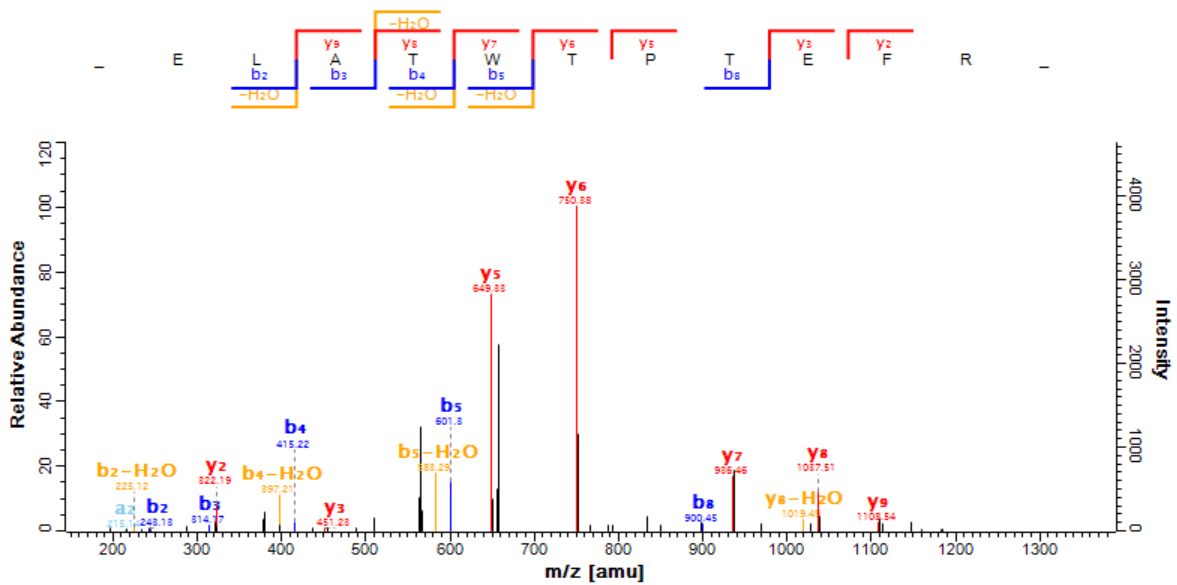

**Protein Group ID:** 1843  
**Protein Accession Numbers:** P35869  
**Gene Names:** AHR  
**Peptide Sequence:** DIDLTDEILTYVQDSLK  
**Total Number of Spectra:** 3  
**Number of Replicates (out of 10):** 3  
**Best Match Score:** 127.22  
**Best Match Posterior Error Probability:** 3.88E-05  
**Best Match Spectrum:**

**Scan number** 8365      **Raw file** Prt-OGE-Batch3--Mock-Frac12  
**Method** ITMS; CID      **Genenames** AHR

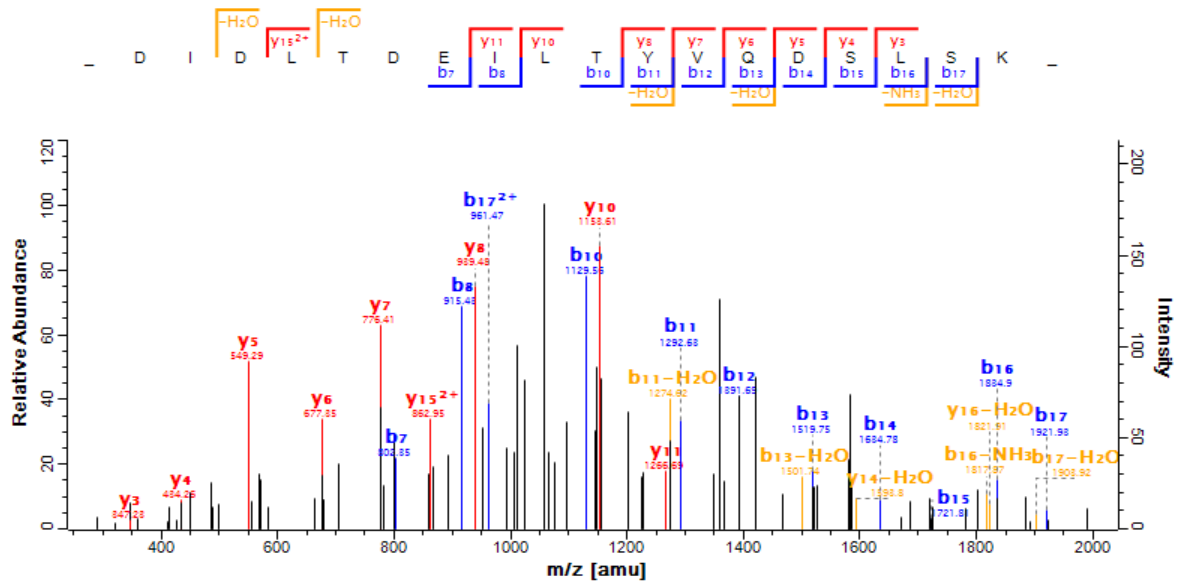



**Protein Group ID:** 1848

**Protein Accession Numbers:** P36406; P36406-2; P36406-3

**Gene Names:** TRIM23

**Peptide Sequence:** DALLLIFANK

**Total Number of Spectra:** 1

**Number of Replicates (out of 10):** 1

**Best Match Score:** 98.943

**Best Match Posterior Error Probability:** 0.00059455

**Best Match Spectrum:**

**Scan number** 4010      **Raw file** Prt-OGE-Batch2-WT-Frac19  
**Method** ITMS; CID      **Genenames** TRIM23

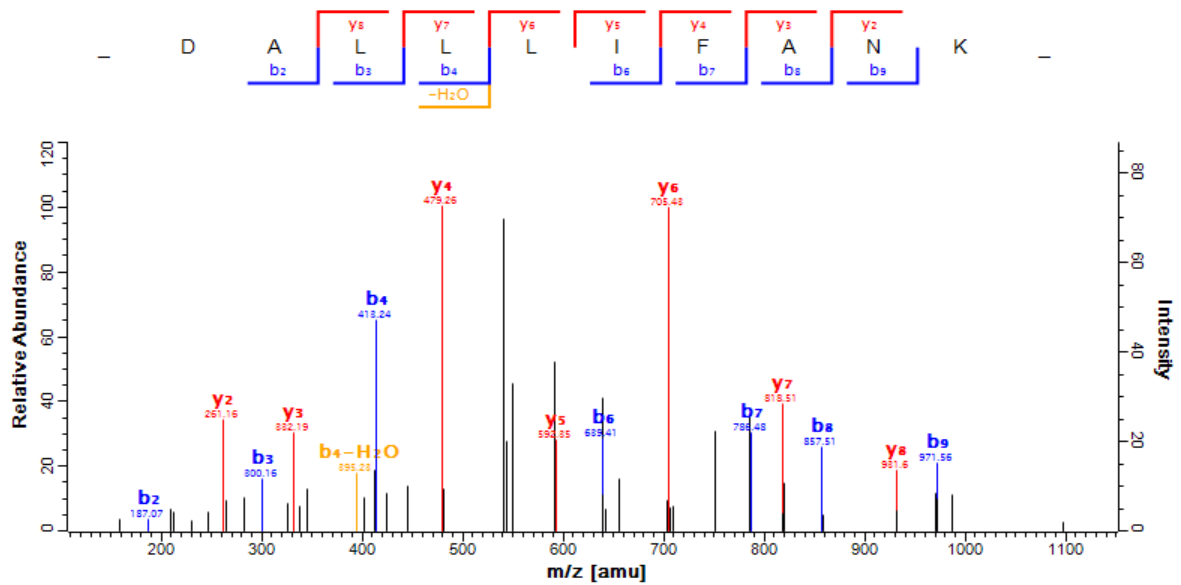

**Protein Group ID:** 1894

**Protein Accession Numbers:** P42226; P42226-3; P42226-2

**Gene Names:** STAT6

**Peptide Sequence:** LLLEGQGESGGSLGAQPLLQPSHYGQSGISM<sup>-H<sub>2</sub>O</sup>SHMDLR

**Total Number of Spectra:** 1

**Number of Replicates (out of 10):** 1

**Best Match Score:** 49.025

**Best Match Posterior Error Probability:** 0.00051341

**Best Match Spectrum:**

|                    |           |                  |                          |
|--------------------|-----------|------------------|--------------------------|
| <b>Scan number</b> | 4234      | <b>Raw file</b>  | Prt-OGE-Batch3-WT-Frac12 |
| <b>Method</b>      | ITMS; CID | <b>Genenames</b> | STAT6                    |

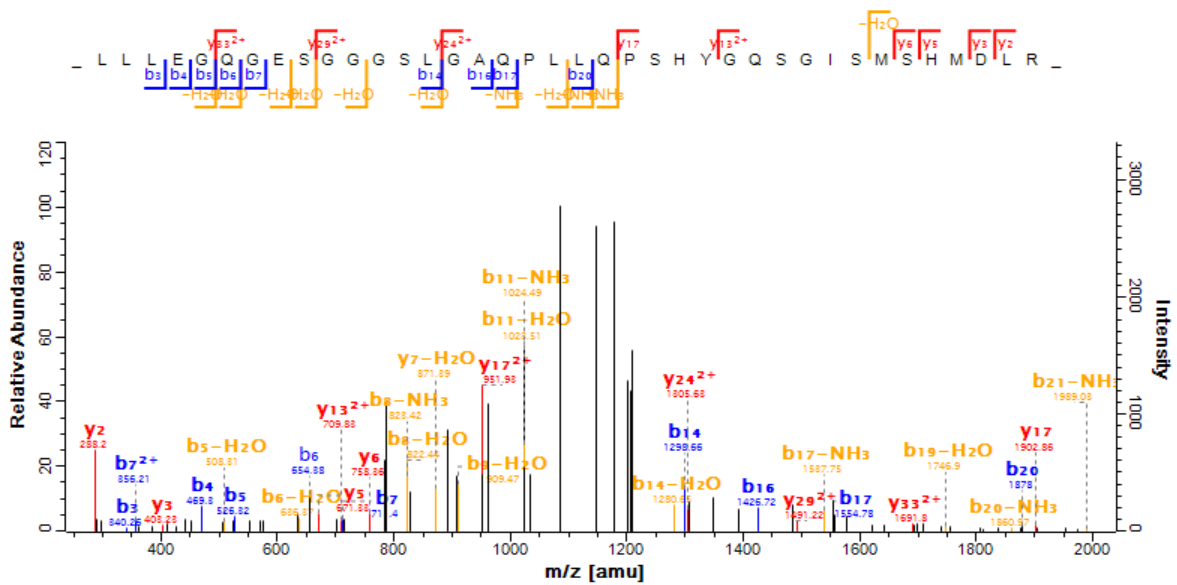

**Protein Group ID:** 1912  
**Protein Accession Numbers:** P45985-2; P45985  
**Gene Names:** MAP2K4  
**Peptide Sequence:** FTLNPNPTGVQNPHIER  
**Total Number of Spectra:** 2  
**Number of Replicates (out of 10):** 2  
**Best Match Score:** 118.2  
**Best Match Posterior Error Probability:** 0.00013922  
**Best Match Spectrum:**

**Scan number** 2751      **Raw file** Prt-OGE-Batch3--Mock-Frac1 8  
**Method** ITMS; CID      **Genenames** MAP2K4

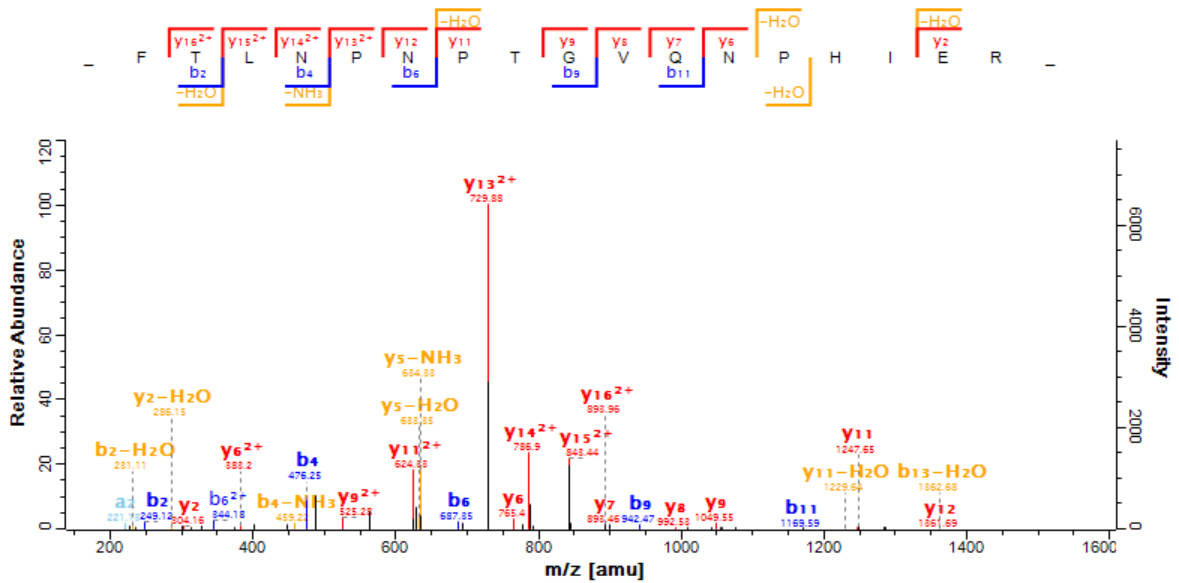

**Protein Group ID:** 1934  
**Protein Accession Numbers:** P47813  
**Gene Names:** EIF1AX  
**Peptide Sequence:** LEAMCFDGVK  
**Total Number of Spectra:** 12  
**Number of Replicates (out of 10):** 7  
**Best Match Score:** 143.96  
**Best Match Posterior Error Probability:** 5.81E-05  
**Best Match Spectrum:**

**Scan number** 3527      **Raw file** OGE-WT-Frac7  
**Method** ITMS; CID      **Genenames** EIF1AX

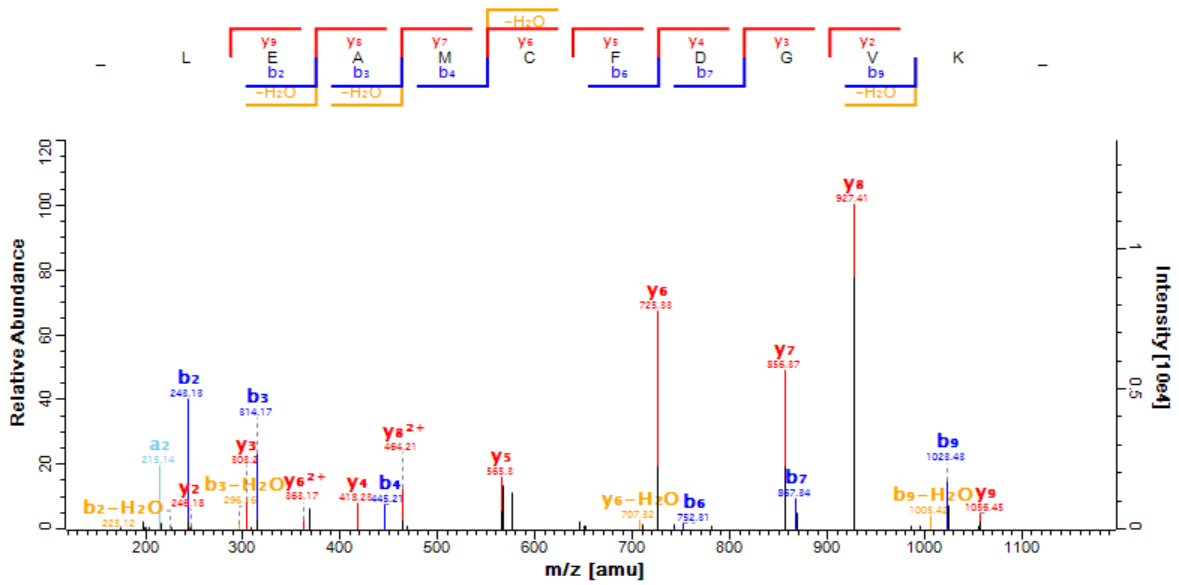

**Protein Group ID:** 1969  
**Protein Accession Numbers:** P49711  
**Gene Names:** CTCF  
**Peptide Sequence:** MEGDAVEAIVEESETFIK  
**Total Number of Spectra:** 5  
**Number of Replicates (out of 10):** 5  
**Best Match Score:** 169.02  
**Best Match Posterior Error Probability:** 3.78E-16  
**Best Match Spectrum:**

**Scan number** 7476      **Raw file** OGE-Mock-Frac2  
**Method** ITMS; CID      **Genenames** CTCF

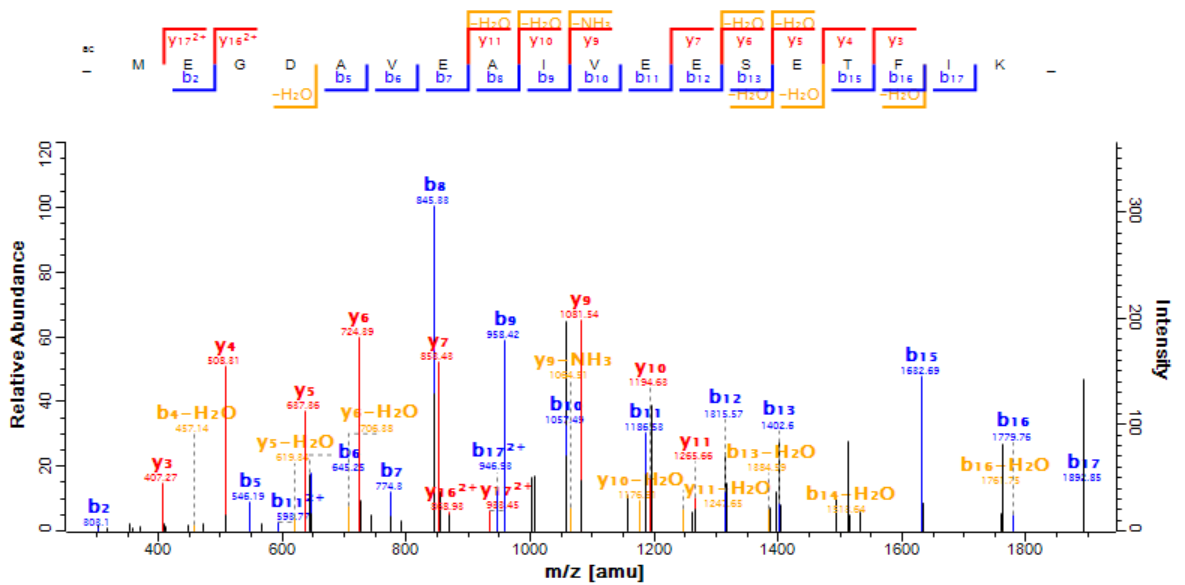

**Protein Group ID:** 1974

**Protein Accession Numbers:** P49753; P49753-2; B3KSA0

**Gene Names:** ACOT2

**Peptide Sequence:** TMETLHLEYFEEAMNYLLSHPEVK

**Total Number of Spectra:** 12

**Number of Replicates (out of 10):** 8

**Best Match Score:** 118.96

**Best Match Posterior Error Probability:** 4.39E-11

**Best Match Spectrum:**

**Scan number** 6617      **Raw file** OGE-WT-Frac19  
**Method** ITMS; CID      **Genenames** ACOT2

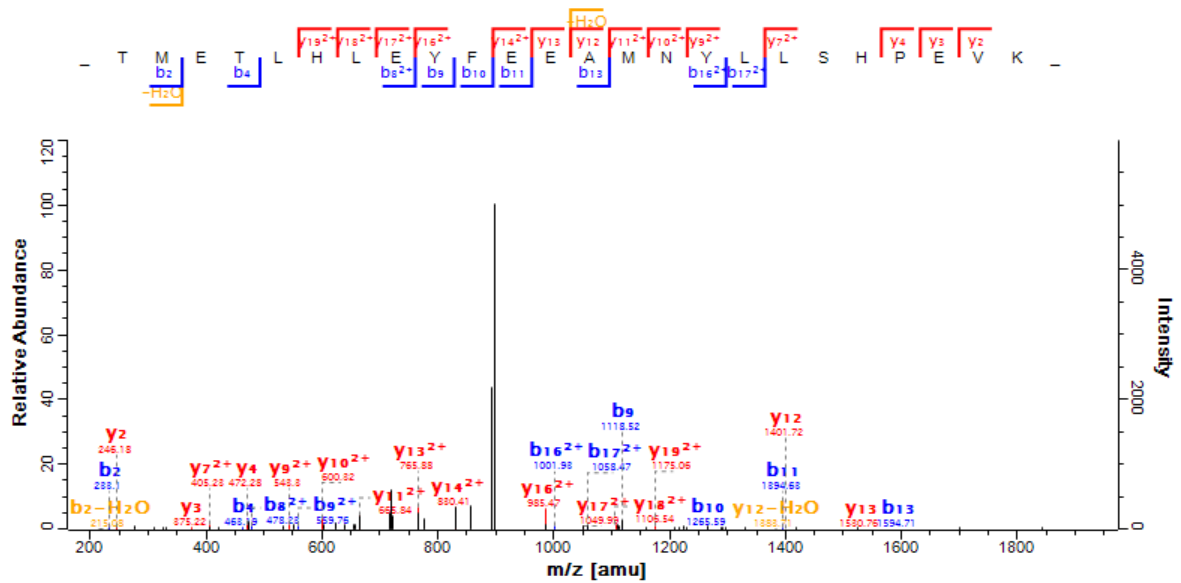

**Protein Group ID:** 2007  
**Protein Accession Numbers:** P51580  
**Gene Names:** TPMT  
**Peptide Sequence:** TAFHQEQGHQLLK  
**Total Number of Spectra:** 1  
**Number of Replicates (out of 10):** 1  
**Best Match Score:** 91.961  
**Best Match Posterior Error Probability:** 0.00086156  
**Best Match Spectrum:**

|                    |           |                  |                                        |
|--------------------|-----------|------------------|----------------------------------------|
| <b>Scan number</b> | 1350      | <b>Raw file</b>  | 20100914-KD-Batch4-Prt-OGE-Mock-Frac12 |
| <b>Method</b>      | ITMS; CID | <b>Genenames</b> | TPMT                                   |

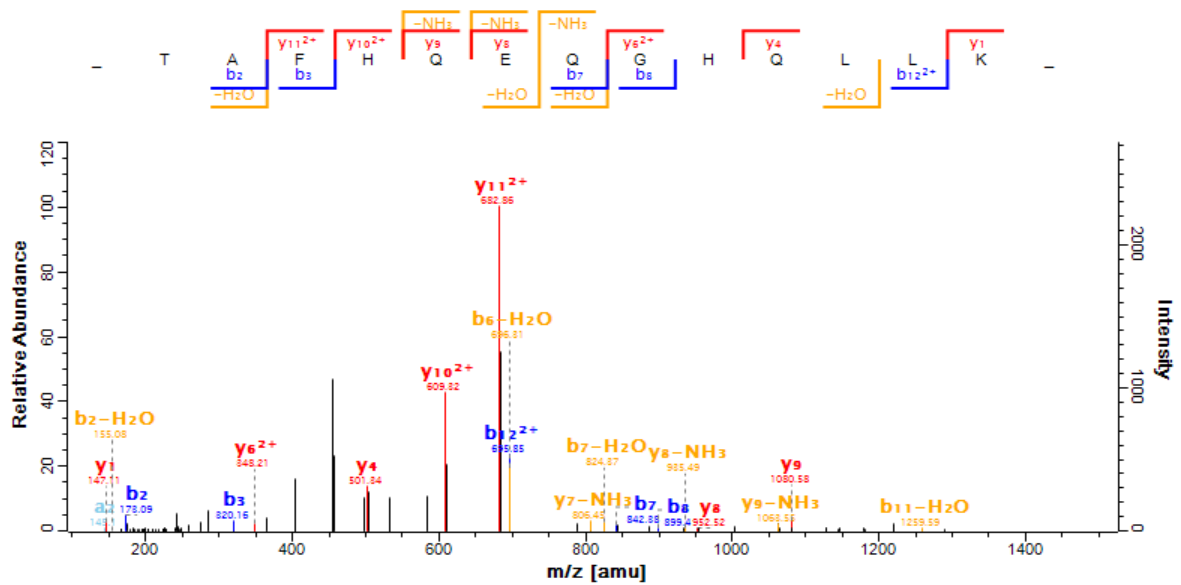

**Protein Group ID:** 2011  
**Protein Accession Numbers:** P51812  
**Gene Names:** RPS6KA3  
**Peptide Sequence:** PLAQLADPWQK  
**Total Number of Spectra:** 3  
**Number of Replicates (out of 10):** 3  
**Best Match Score:** 107.85  
**Best Match Posterior Error Probability:** 0.00016673  
**Best Match Spectrum:**

**Scan number** 4484      **Raw file** Prt-OGE-Batch3--Mock-Frac14  
**Method** ITMS; CID      **Genenames** RPS6KA3

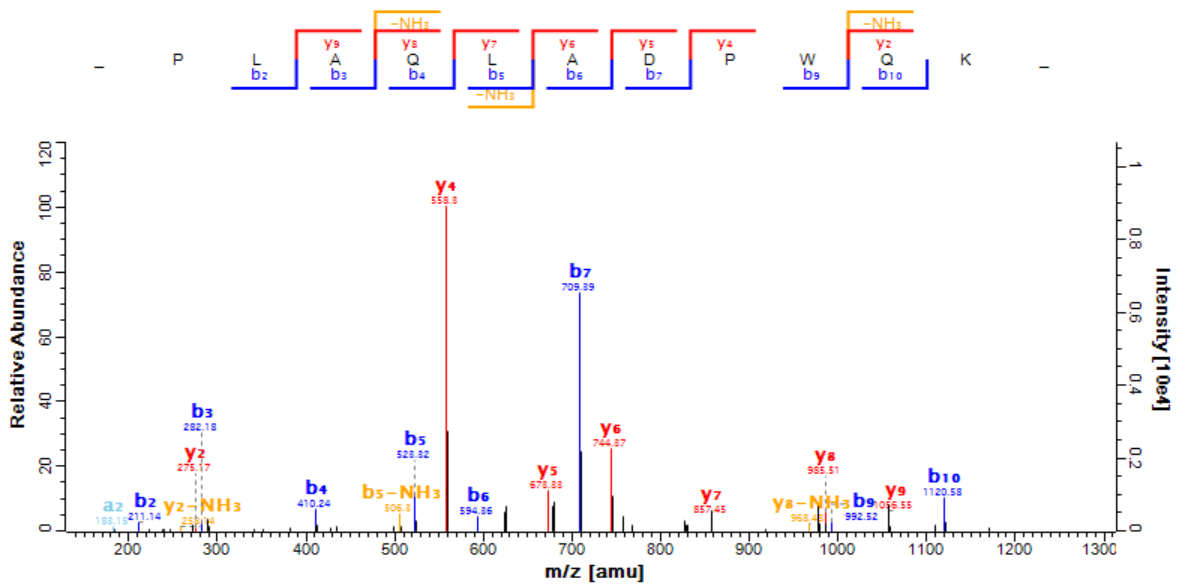



**Protein Group ID:** 2027

**Protein Accession Numbers:** P52740; P52740-2

**Gene Names:** ZNF132

**Peptide Sequence:** AFNNNSNLAQHQK

**Total Number of Spectra:** 1

**Number of Replicates (out of 10):** 1

**Best Match Score:** 81.625

**Best Match Posterior Error Probability:** 0.021486

**Best Match Spectrum:**

**Scan number** 2701      **Raw file** Prt-OGE-Batch2-WT-Frac22  
**Method** ITMS; CID      **Genenames** ZNF132

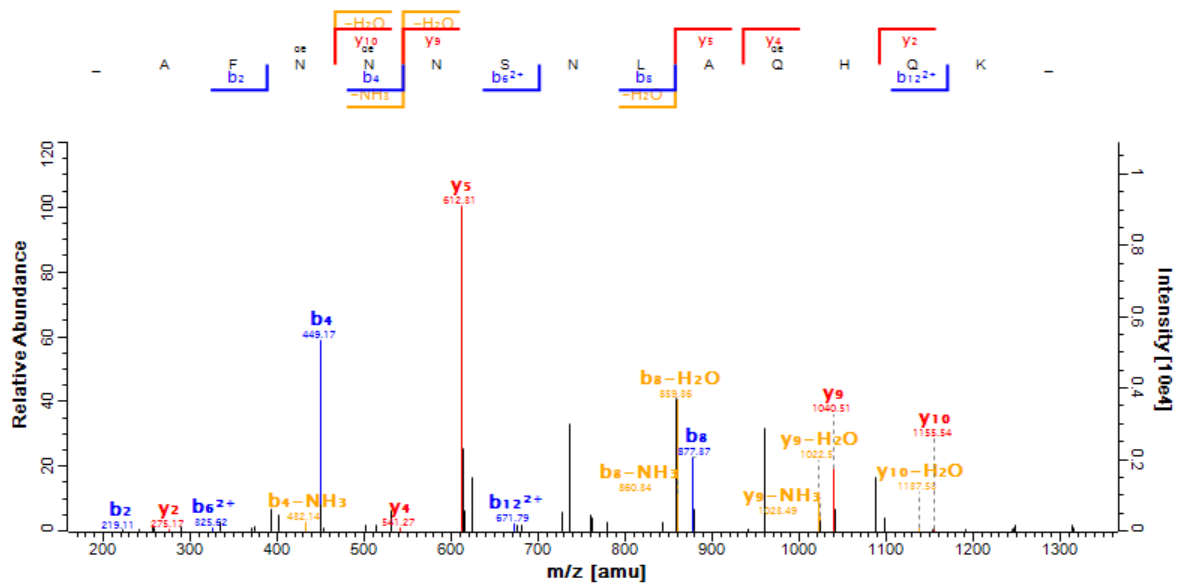

**Protein Group ID:** 2030  
**Protein Accession Numbers:** P52815  
**Gene Names:** MRPL12  
**Peptide Sequence:** AALEAVGGTVVLE  
**Total Number of Spectra:** 12  
**Number of Replicates (out of 10):** 9  
**Best Match Score:** 122.7  
**Best Match Posterior Error Probability:** 9.36E-05  
**Best Match Spectrum:**

**Scan number** 4594      **Raw file** 20100927-KD-Batch4-Prt-OGE-WT-Frac7  
**Method** ITMS; CID      **Genenames** MRPL12

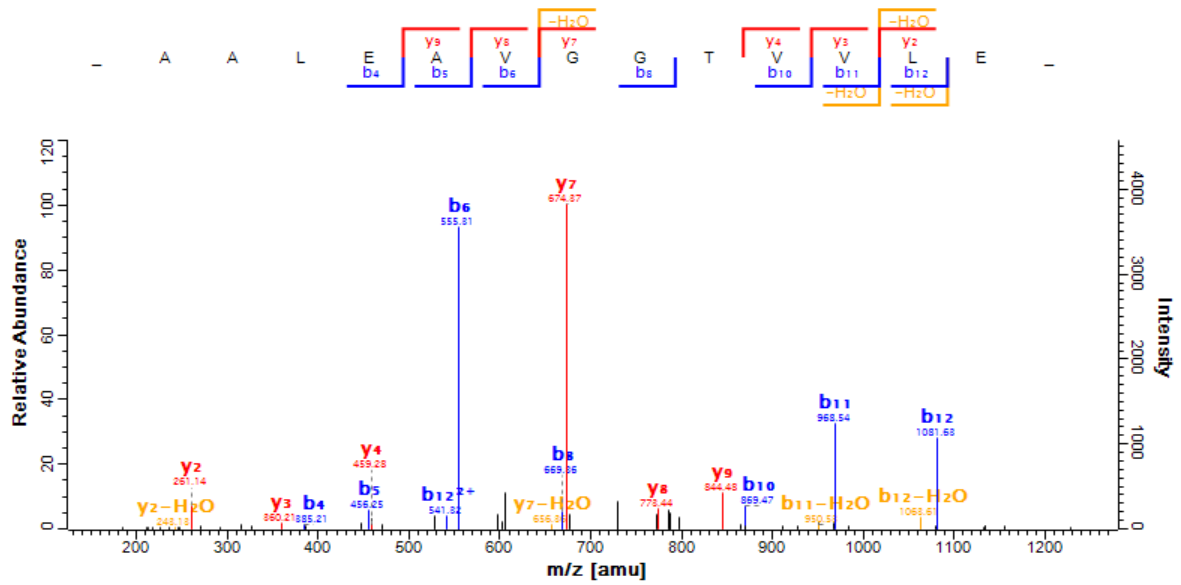

**Protein Group ID:** 2049

**Protein Accession Numbers:** Q13131-2; Q13131; P54646; Q96E92

**Gene Names:** PRKAA1;PRKAA2

**Peptide Sequence:** IADFGLSNMMSDGEFLR

**Total Number of Spectra:** 3

**Number of Replicates (out of 10):** 3

**Best Match Score:** 123.08

**Best Match Posterior Error Probability:** 9.77E-05

**Best Match Spectrum:**

**Scan number** 6097      **Raw file** 20100914-KD-Batch4-Prt-OGE-Mock-Frac17  
**Method** ITMS; CID      **Genenames** PRKAA1;PRKAA2

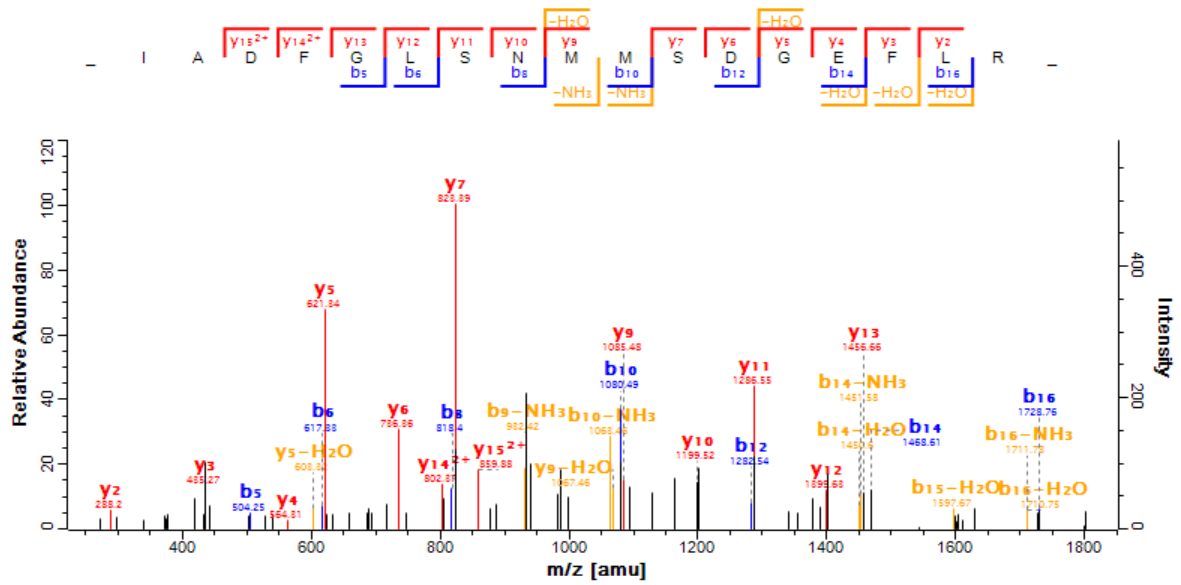

**Protein Group ID:** 2081  
**Protein Accession Numbers:** P60468  
**Gene Names:** SEC61B  
**Peptide Sequence:** VGPVPLVMSLLFIASVFM LHIWGKYTRS  
**Total Number of Spectra:** 7  
**Number of Replicates (out of 10):** 5  
**Best Match Score:** 93.729  
**Best Match Posterior Error Probability:** 4.37E-09  
**Best Match Spectrum:**

**Scan number** 10358      **Raw file** 20100930-KD-Batch5-Prt-OGE-WT-Frac11  
**Method** ITMS; CID      **Genenames** SEC61B

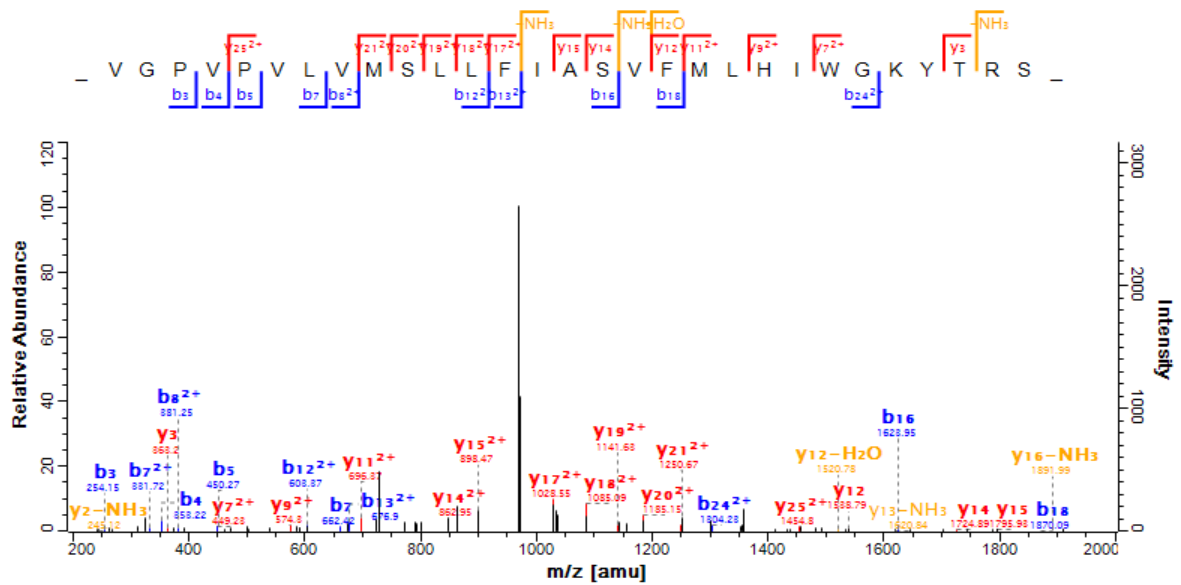

**Protein Group ID:** 2083  
**Protein Accession Numbers:** P60602; P60602-2  
**Gene Names:** ROMO1  
**Peptide Sequence:** PVAVGPGYSQPSCFDR  
**Total Number of Spectra:** 5  
**Number of Replicates (out of 10):** 3  
**Best Match Score:** 131.18  
**Best Match Posterior Error Probability:** 2.42E-05  
**Best Match Spectrum:**

**Scan number** 2814      **Raw file** 20100930-KD-Batch5-Prt-OGE-WT-Frac21  
**Method** ITMS; CID      **Genenames** ROMO1

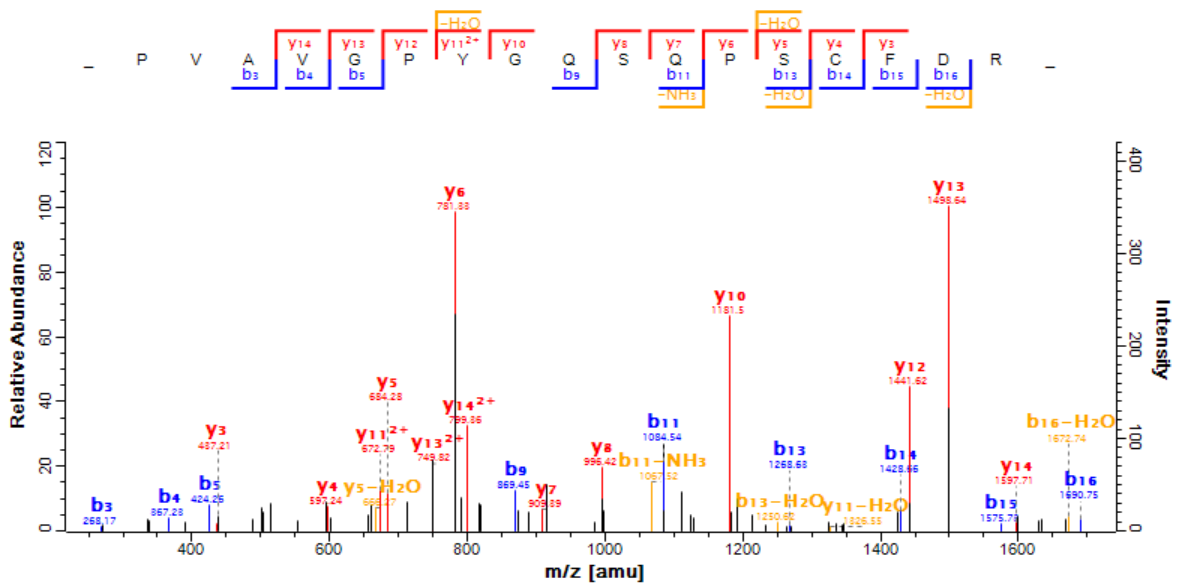

**Protein Group ID:** 2095  
**Protein Accession Numbers:** P61026  
**Gene Names:** RAB10  
**Peptide Sequence:** AFLTLAEDILR  
**Total Number of Spectra:** 83  
**Number of Replicates (out of 10):** 10  
**Best Match Score:** 212.82  
**Best Match Posterior Error Probability:** 2.89E-31  
**Best Match Spectrum:**

**Scan number** 6978      **Raw file** 20100927-KD-Batch4-Prt-OGE-WT-Frac11  
**Method** ITMS; CID      **Genenames** RAB10

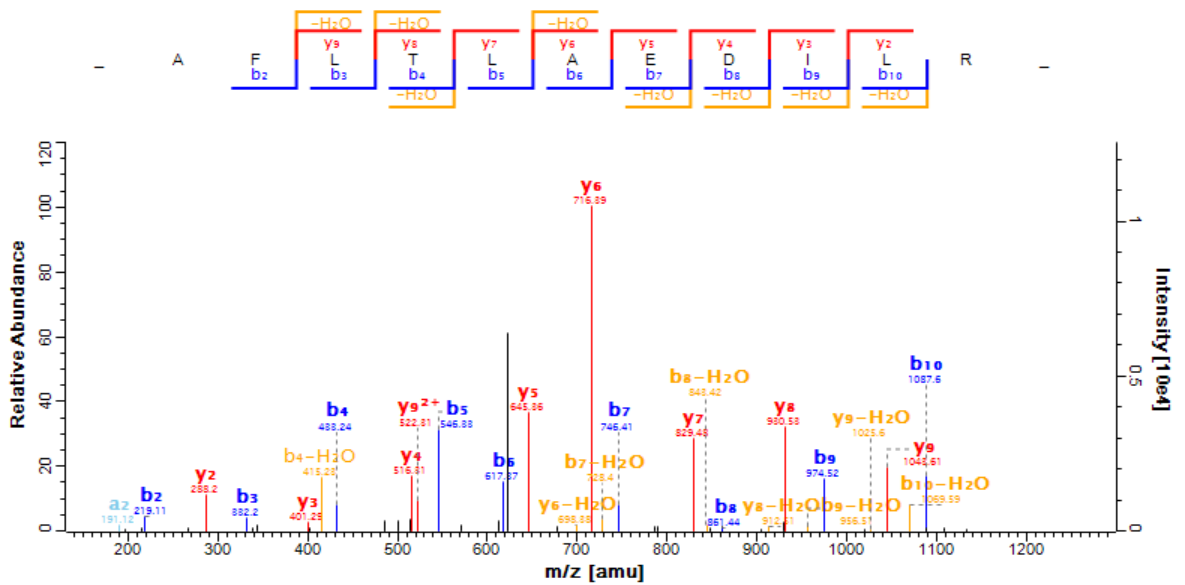

**Protein Group ID:** 2099  
**Protein Accession Numbers:** P61106  
**Gene Names:** RAB14  
**Peptide Sequence:** TGENVEDAFLEAAK  
**Total Number of Spectra:** 2  
**Number of Replicates (out of 10):** 2  
**Best Match Score:** 92.265  
**Best Match Posterior Error Probability:** 0.00058249  
**Best Match Spectrum:**

**Scan number** 4843      **Raw file** Prt-OGE-Batch2-Mock-Frac13  
**Method** ITMS; CID      **Genenames** RAB14

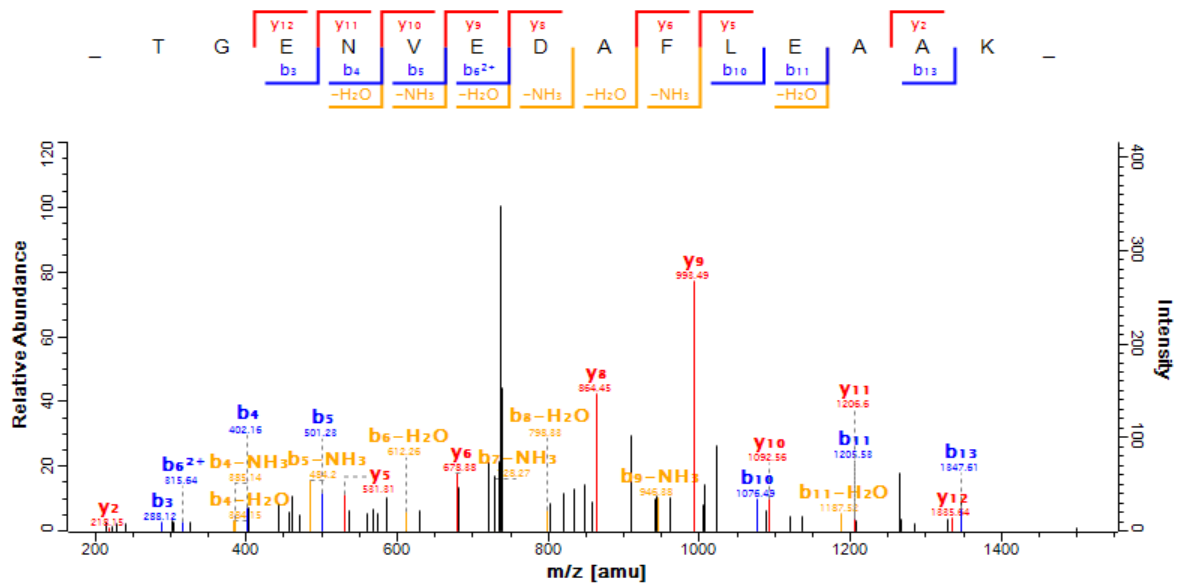

**Protein Group ID:** 2114  
**Protein Accession Numbers:** P61764-2; P61764  
**Gene Names:** STXBP1  
**Peptide Sequence:** ISEQTYQLSR  
**Total Number of Spectra:** 1  
**Number of Replicates (out of 10):** 1  
**Best Match Score:** 107.18  
**Best Match Posterior Error Probability:** 0.0003801  
**Best Match Spectrum:**

**Scan number** 1492      **Raw file** Prt-OGE-Batch3-Mock-Frac16  
**Method** ITMS; CID      **Genenames** STXBP1

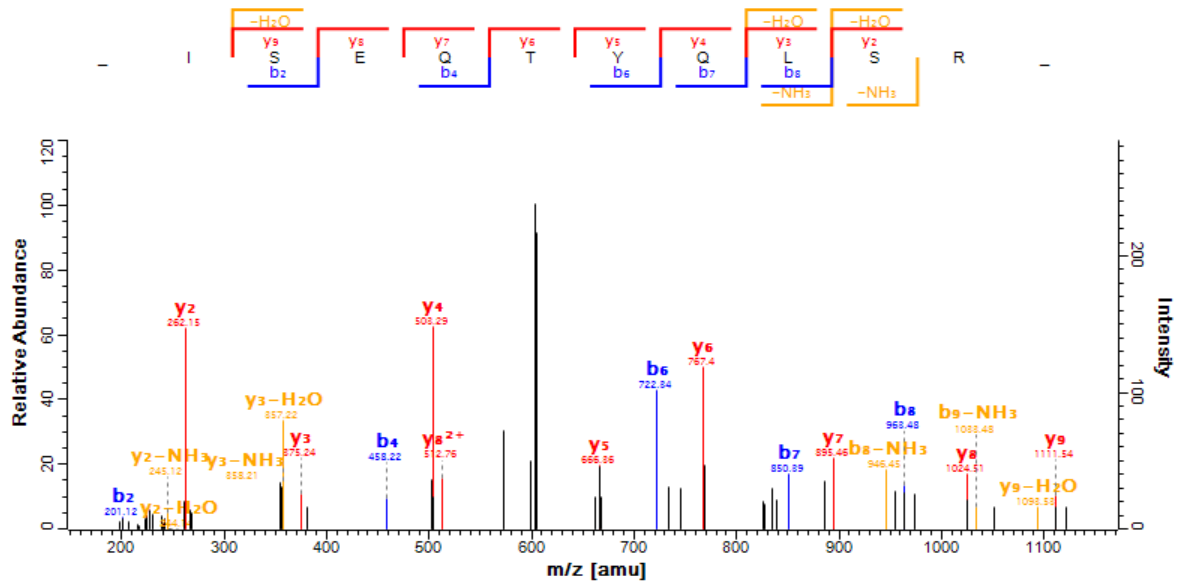



**Protein Group ID:** 2115  
**Protein Accession Numbers:** P61952  
**Gene Names:** GNG11  
**Peptide Sequence:** PALHIEDLPEKEK  
**Total Number of Spectra:** 2  
**Number of Replicates (out of 10):** 2  
**Best Match Score:** 113.38  
**Best Match Posterior Error Probability:** 0.00060963  
**Best Match Spectrum:**

**Scan number** 2837 **Raw file** Prt-OGE-Batch3--Mock-Frac13  
**Method** ITMS; CID **Genenames** GNG11

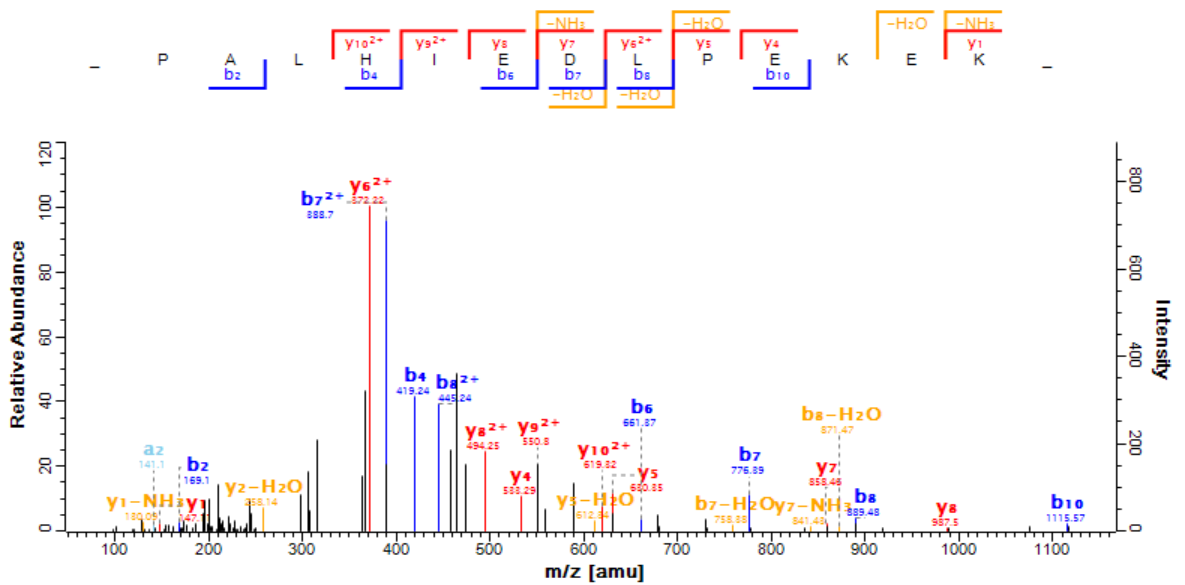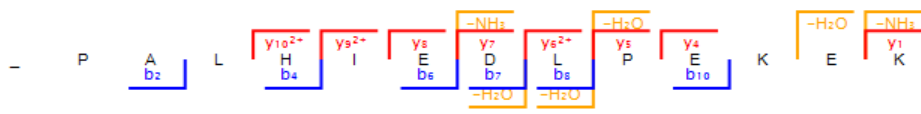

**Protein Group ID:** 2151  
**Protein Accession Numbers:** P62714; E5RJX4  
**Gene Names:** PPP2CB  
**Peptide Sequence:** ELDQWVEQLNECK  
**Total Number of Spectra:** 10  
**Number of Replicates (out of 10):** 7  
**Best Match Score:** 267.93  
**Best Match Posterior Error Probability:** 0  
**Best Match Spectrum:**

**Scan number** 4243      **Raw file** 20100917-KD-Batch5-Prt-OGE-Mock-Frac7  
**Method** ITMS; CID      **Genenames** PPP2CB

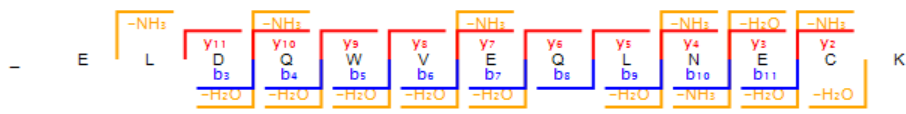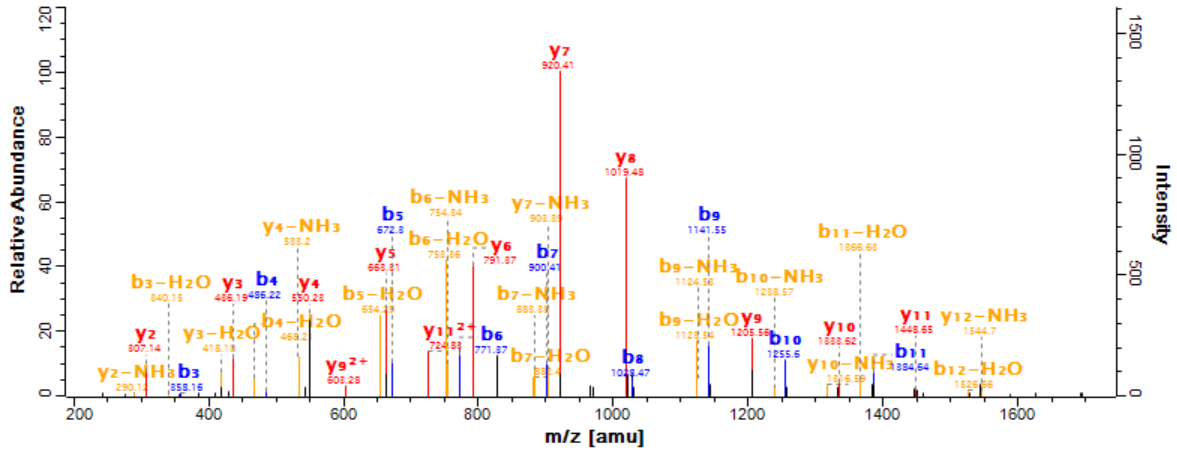

**Protein Group ID:** 2160  
**Protein Accession Numbers:** P62877  
**Gene Names:** RBX1  
**Peptide Sequence:** AAAMDVDTPSGTNSGAGK  
**Total Number of Spectra:** 11  
**Number of Replicates (out of 10):** 7  
**Best Match Score:** 222.57  
**Best Match Posterior Error Probability:** 8.49E-68  
**Best Match Spectrum:**

**Scan number** 2443      **Raw file** 20100930-KD-Batch5-Prt-OGE-WT-Frac15  
**Method** ITMS; CID      **Genenames** RBX1

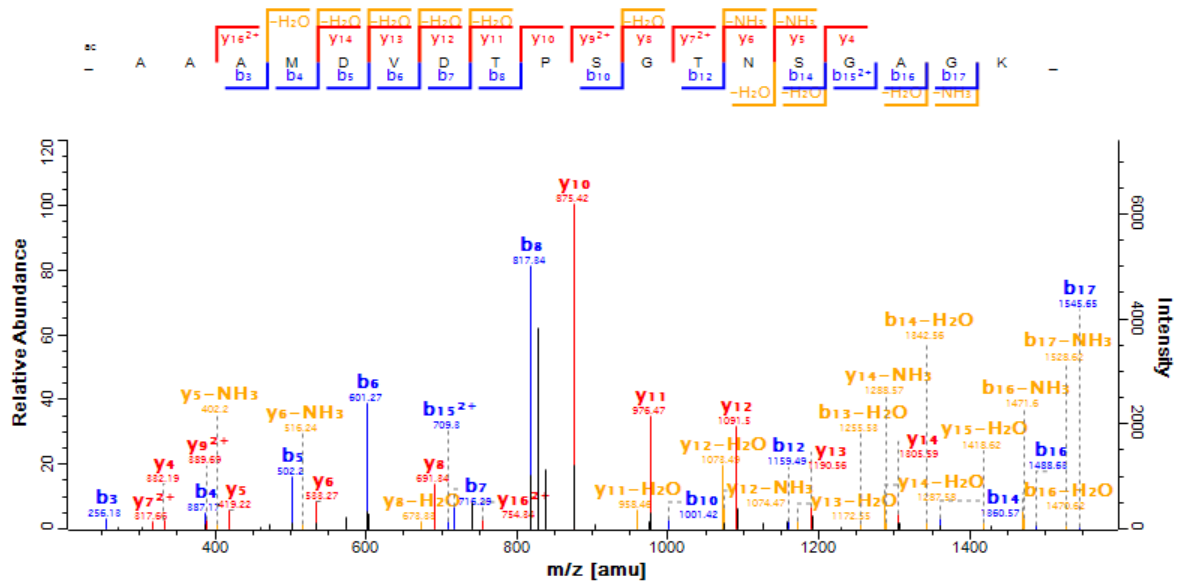

**Protein Group ID:** 2181

**Protein Accession Numbers:** P63261; I3L3I4; I3L1U9; I3L3I0; I3L4N8; I3L3R2; J3KT65; K7EM38

**Gene Names:** ACTG1

**Peptide Sequence:** EEEIAALVIDNGSGMCK

**Total Number of Spectra:** 210

**Number of Replicates (out of 10):** 8

**Best Match Score:** 268.93

**Best Match Posterior Error Probability:** 1.26E-119

**Best Match Spectrum:**

|                    |           |                  |              |
|--------------------|-----------|------------------|--------------|
| <b>Scan number</b> | 5924      | <b>Raw file</b>  | OGE-WT-Frac7 |
| <b>Method</b>      | ITMS: CID | <b>Genenames</b> | ACTG1        |

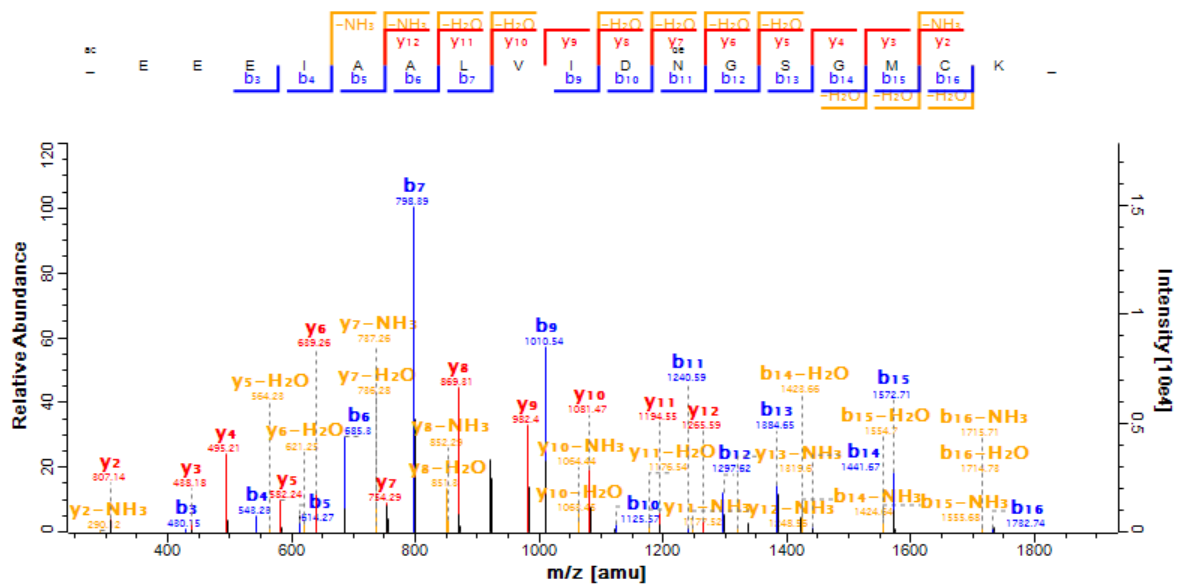

**Protein Group ID:** 2185  
**Protein Accession Numbers:** P67775; P67775-2  
**Gene Names:** PPP2CA  
**Peptide Sequence:** ELDQWIEQLNECK  
**Total Number of Spectra:** 14  
**Number of Replicates (out of 10):** 7  
**Best Match Score:** 295.86  
**Best Match Posterior Error Probability:** 1.67E-156  
**Best Match Spectrum:**

**Scan number** 4948      **Raw file** 20100914-KD-Batch4-Prt-OGE-Mock-Frac8  
**Method** ITMS; CID      **Genenames** PPP2CA

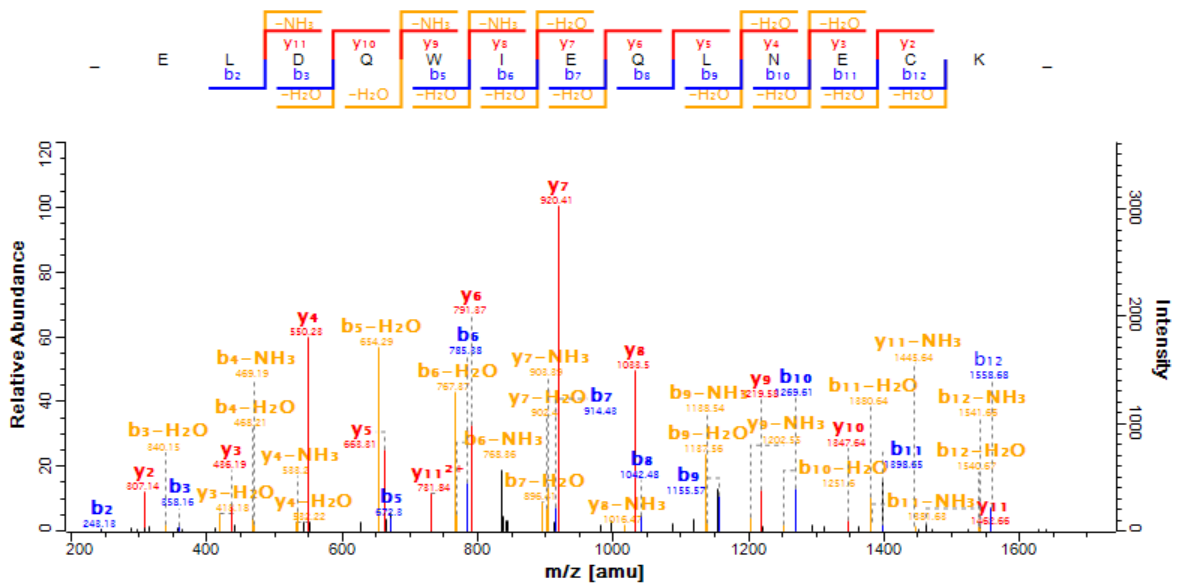

**Protein Group ID:** 2192  
**Protein Accession Numbers:** P68106; P68106-2  
**Gene Names:** FKBP1B  
**Peptide Sequence:** GQTCVVHYTGMLQNGK  
**Total Number of Spectra:** 2  
**Number of Replicates (out of 10):** 2  
**Best Match Score:** 145  
**Best Match Posterior Error Probability:** 0.0001804  
**Best Match Spectrum:**

**Scan number** 2756      **Raw file** 20100927-KD-Batch4-Prt-OGE-WT-Frac19  
**Method** ITMS; CID      **Genenames** FKBP1B

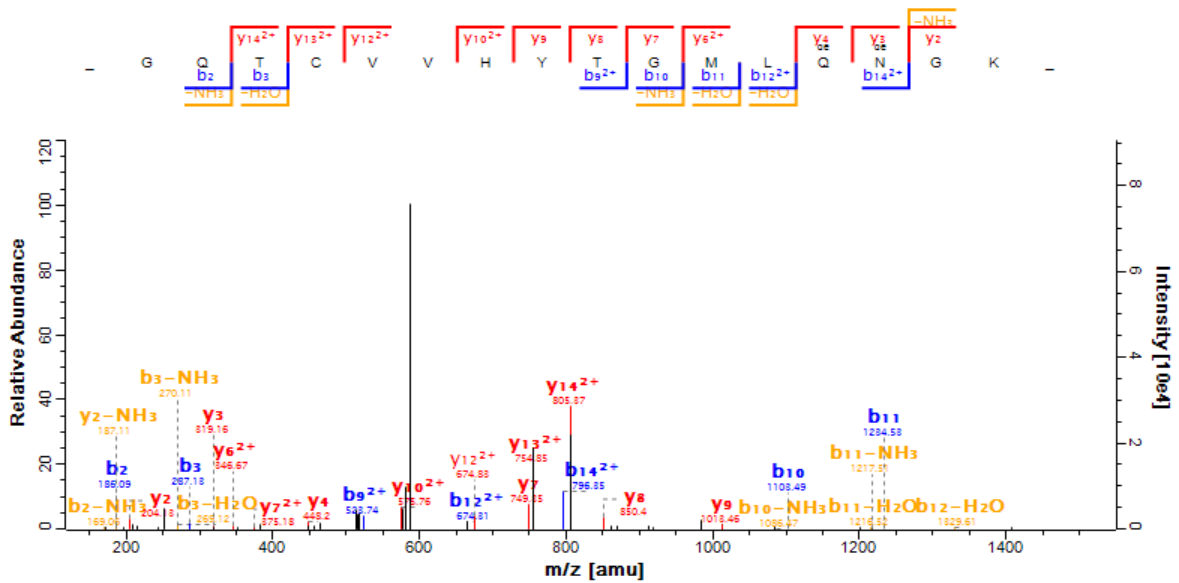

**Protein Group ID:** 2195  
**Protein Accession Numbers:** P68371  
**Gene Names:** TUBB4B  
**Peptide Sequence:** INVYYNEATGGK  
**Total Number of Spectra:** 137  
**Number of Replicates (out of 10):** 10  
**Best Match Score:** 269.93  
**Best Match Posterior Error Probability:** 6.74E-98  
**Best Match Spectrum:**

**Scan number** 2749      **Raw file** OGE-Mock-Frac7  
**Method** ITMS; CID      **Genenames** TUBB4B

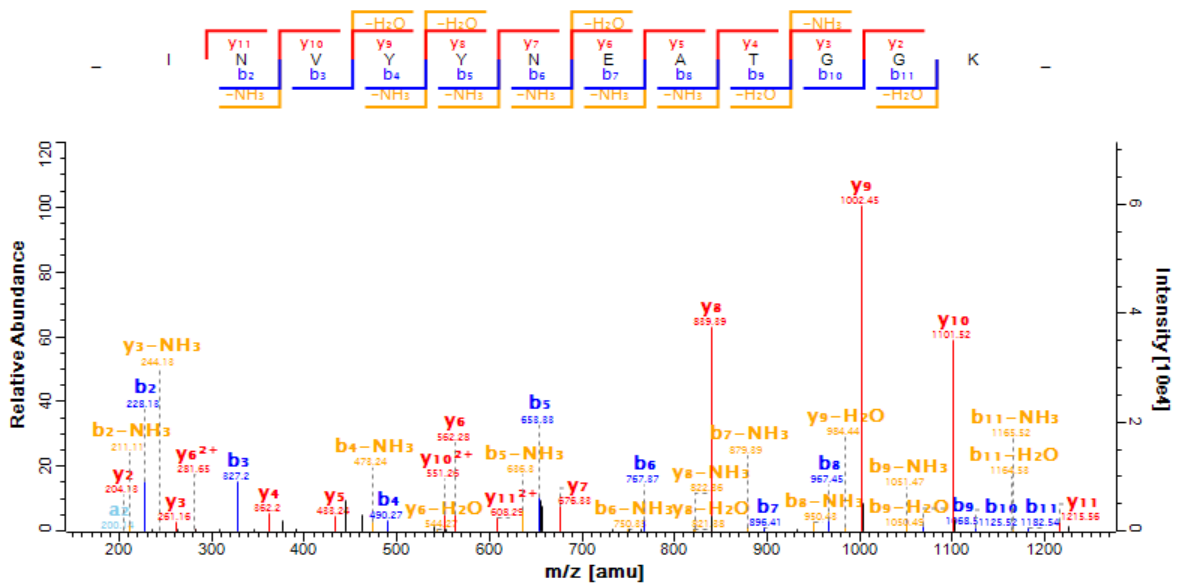

**Protein Group ID:** 2197

**Protein Accession Numbers:** P68431

**Gene Names:** HIST1H3A

**Peptide Sequence:** FQSSAVMALQEACEAYLVGLFEDTNLCAIHAK

**Total Number of Spectra:** 2

**Number of Replicates (out of 10):** 1

**Best Match Score:** 94.767

**Best Match Posterior Error Probability:** 1.64E-13

**Best Match Spectrum:**

**Scan number** 7757      **Raw file** 20100930-KD-Batch5-Prt-OGE-WT-Frac22  
**Method** ITMS; CID      **Genenames** HIST1H3A

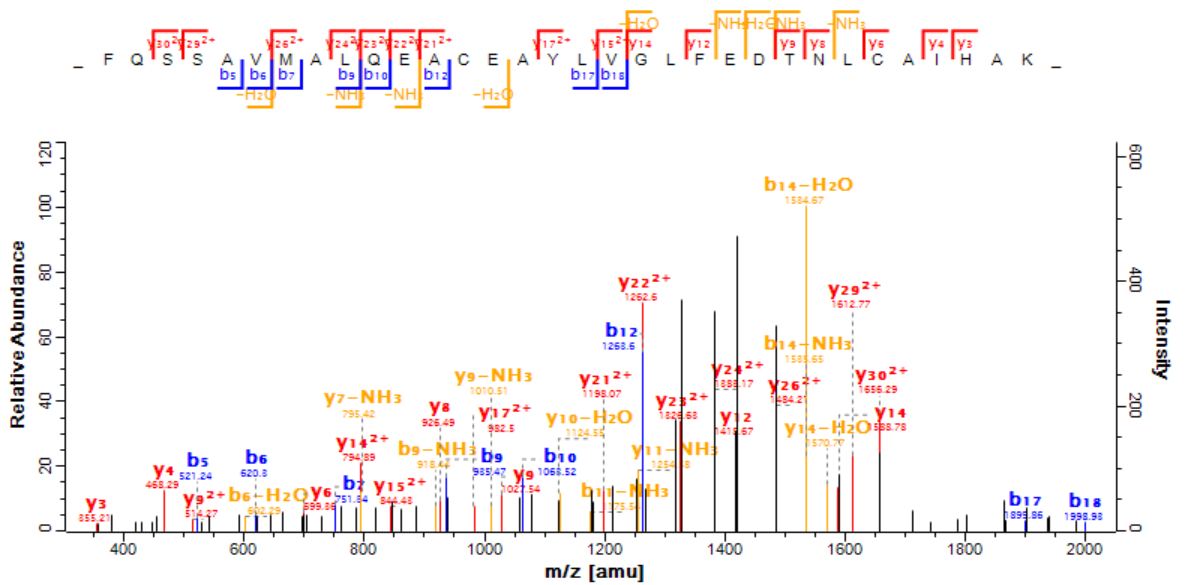



**Protein Group ID:** 2198  
**Protein Accession Numbers:** P69905  
**Gene Names:** HBA1  
**Peptide Sequence:** VGAHAGEYGAEALER  
**Total Number of Spectra:** 2  
**Number of Replicates (out of 10):** 2  
**Best Match Score:** 131.35  
**Best Match Posterior Error Probability:** 1.11E-05  
**Best Match Spectrum:**

**Scan number** 1562      **Raw file** 20100917-KD-Batch5-Prt-OGE-Mock-Frac19  
**Method** ITMS; CID      **Genenames** HBA1

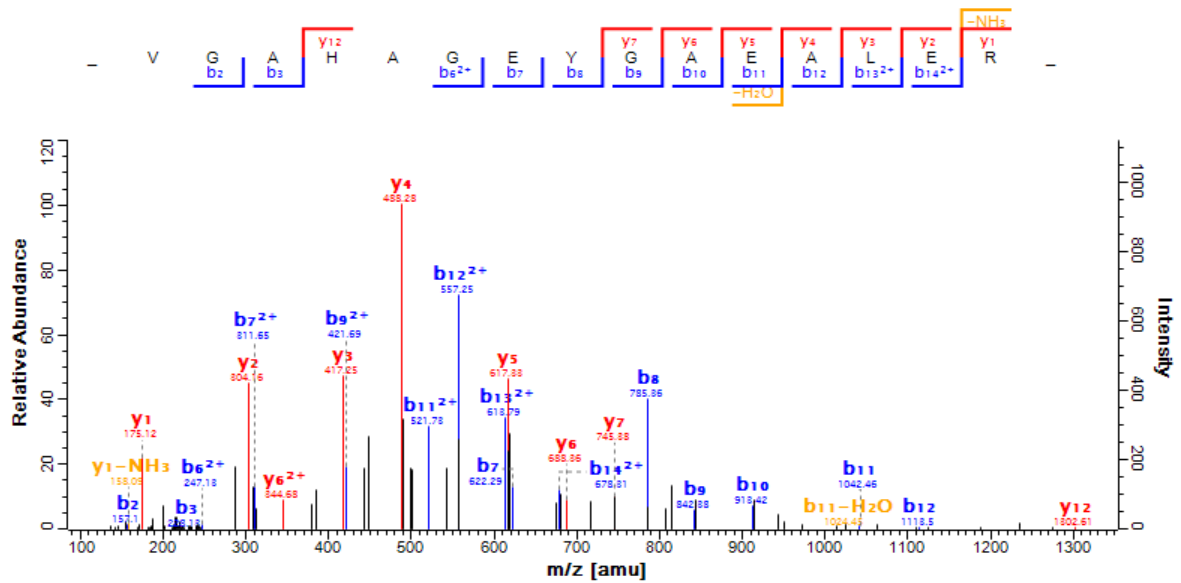

**Protein Group ID:** 2208  
**Protein Accession Numbers:** P80297; H3BT50  
**Gene Names:** MT1X  
**Peptide Sequence:** MDPNCSCSPVGSCACAGSCK  
**Total Number of Spectra:** 11  
**Number of Replicates (out of 10):** 5  
**Best Match Score:** 189.55  
**Best Match Posterior Error Probability:** 8.42E-35  
**Best Match Spectrum:**

**Scan number** 2637      **Raw file** 20100930-KD-Batch5-Prt-OGE-WT-Frac19  
**Method** ITMS; CID      **Genenames** MT1X

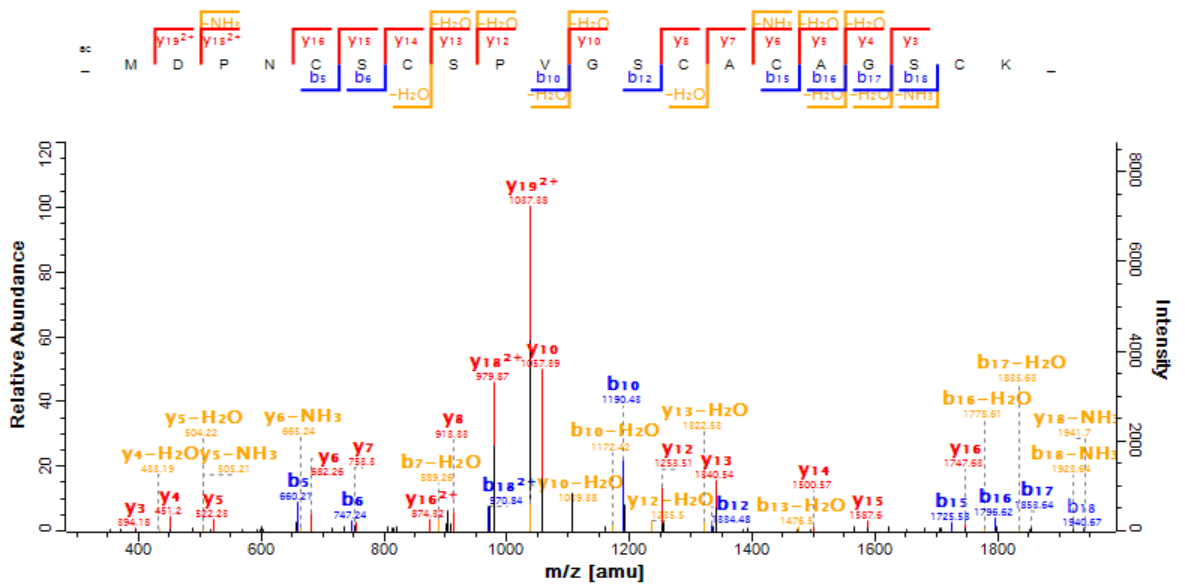

**Protein Group ID:** 2223  
**Protein Accession Numbers:** P83111  
**Gene Names:** LACTB  
**Peptide Sequence:** WAGGGFLSTVGDLLK  
**Total Number of Spectra:** 1  
**Number of Replicates (out of 10):** 1  
**Best Match Score:** 117.08  
**Best Match Posterior Error Probability:** 5.33E-05  
**Best Match Spectrum:**

**Scan number** 6990      **Raw file** 20100917-KD-Batch5-Prt-OGE-Mock-Frac17  
**Method** ITMS; CID      **Genenames** LACTB

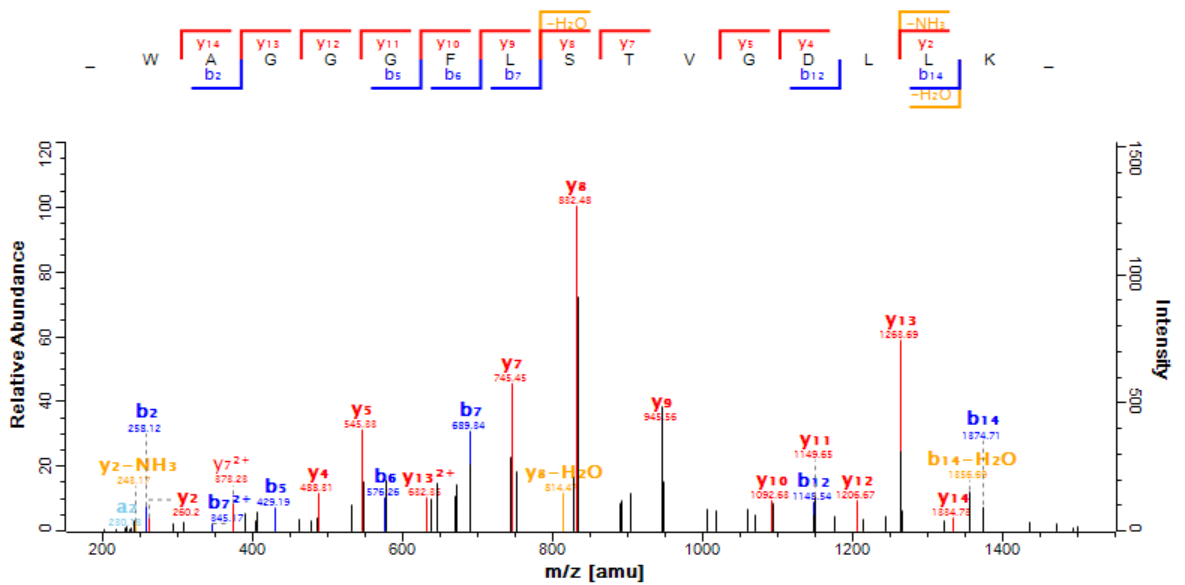

**Protein Group ID:** 2225  
**Protein Accession Numbers:** P84095  
**Gene Names:** RHOG  
**Peptide Sequence:** TCLLIC<sup>Y</sup>TTNAFPK  
**Total Number of Spectra:** 1  
**Number of Replicates (out of 10):** 1  
**Best Match Score:** 104.59  
**Best Match Posterior Error Probability:** 0.0027654  
**Best Match Spectrum:**

**Scan number** 3421      **Raw file** 20100927-KD-Batch4-Prt-OGE-WT-Frac13  
**Method** ITMS; CID      **Genenames** RHOG

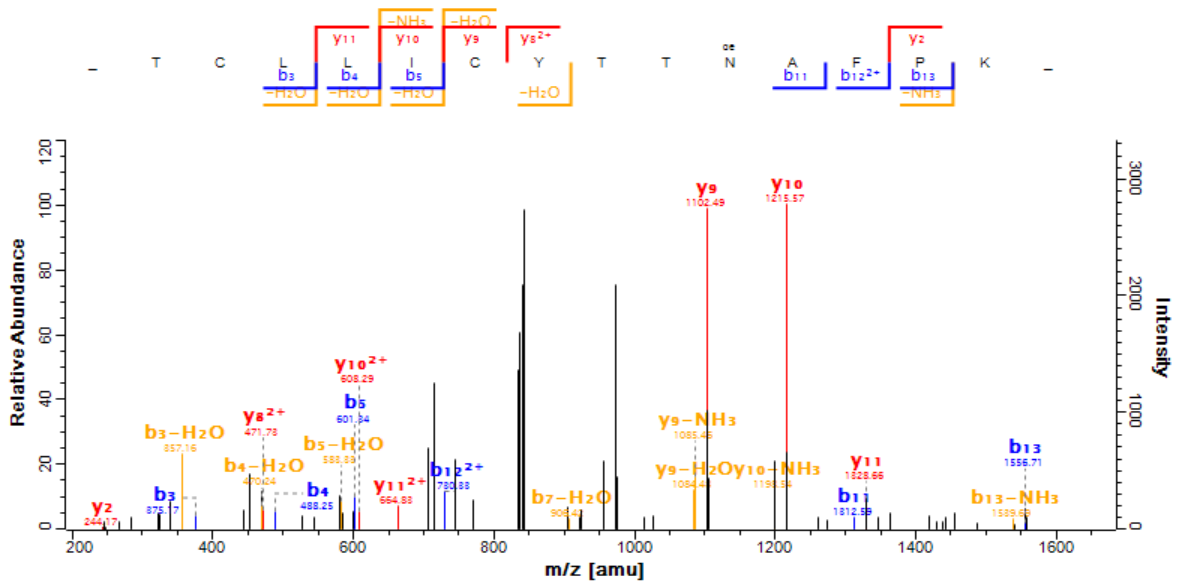

**Protein Group ID:** 2234  
**Protein Accession Numbers:** Q00535; Q00535-2  
**Gene Names:** CDK5  
**Peptide Sequence:** DLLQNLLK  
**Total Number of Spectra:** 11  
**Number of Replicates (out of 10):** 10  
**Best Match Score:** 156.51  
**Best Match Posterior Error Probability:** 0.00055176  
**Best Match Spectrum:**

**Scan number** 4794      **Raw file** Prt-OGE-Batch2-WT-Frac17  
**Method** ITMS; CID      **Genenames** CDK5

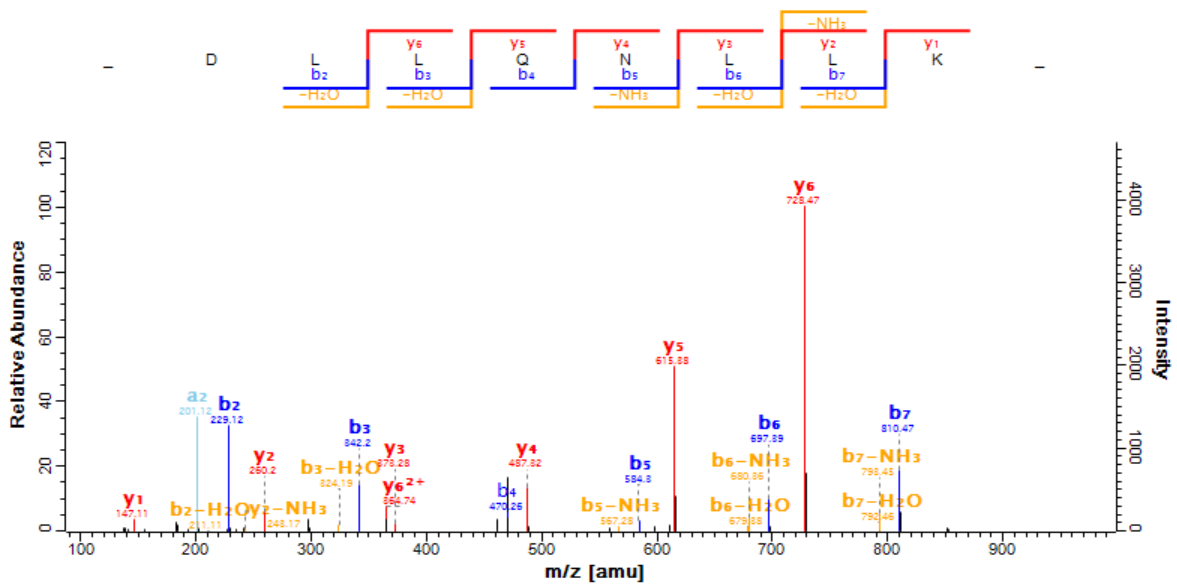

**Protein Group ID:** 2252  
**Protein Accession Numbers:** Q01658  
**Gene Names:** DR1  
**Peptide Sequence:** TISPEHVIQALESLGFGSYISEVK  
**Total Number of Spectra:** 14  
**Number of Replicates (out of 10):** 6  
**Best Match Score:** 92.932  
**Best Match Posterior Error Probability:** 3.22E-06  
**Best Match Spectrum:**

**Scan number** 6844      **Raw file** Prt-OGE-Batch2-WT-Frac9  
**Method** ITMS; CID      **Genenames** DR1

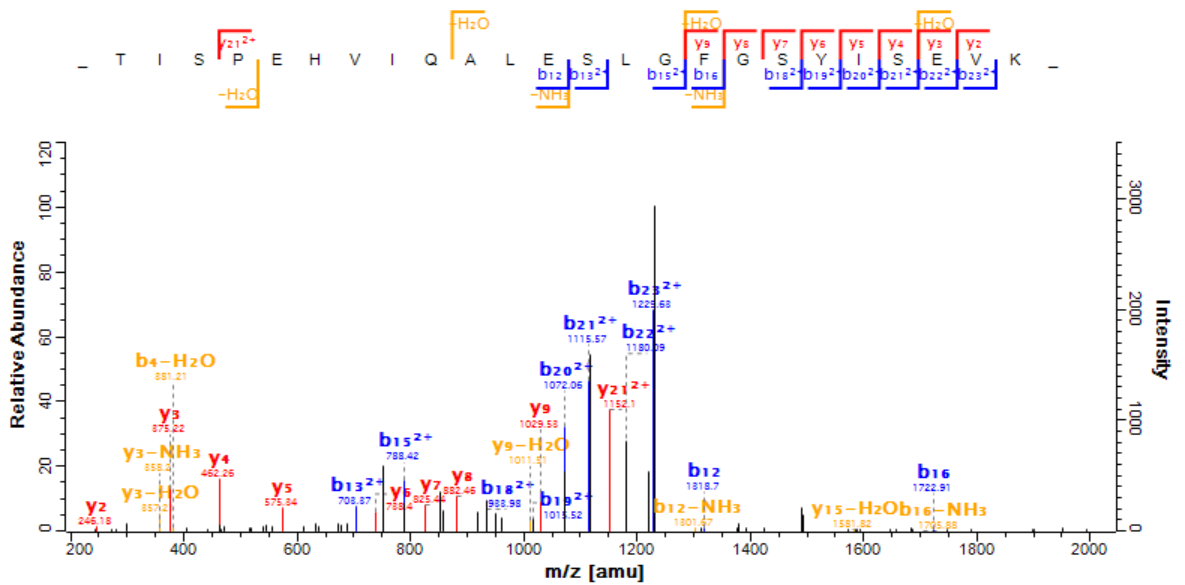

**Protein Group ID:** 2257  
**Protein Accession Numbers:** Q02410  
**Gene Names:** APBA1  
**Peptide Sequence:** DAISLAIK  
**Total Number of Spectra:** 6  
**Number of Replicates (out of 10):** 6  
**Best Match Score:** 110.81  
**Best Match Posterior Error Probability:** 0.0015946  
**Best Match Spectrum:**

**Scan number** 3722      **Raw file** 20100914-KD-Batch4-Prt-OGE-Mock-Frac14  
**Method** ITMS; CID      **Genenames** APBA1

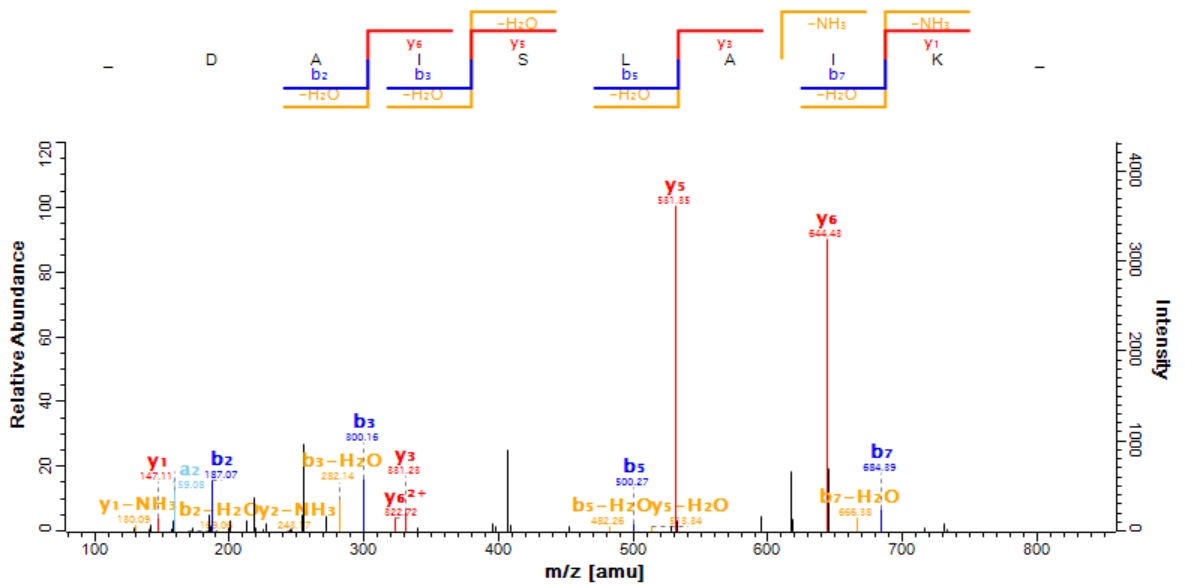

**Protein Group ID:** 2268  
**Protein Accession Numbers:** Q04941  
**Gene Names:** PLP2  
**Peptide Sequence:** HTAAPTDPADGPV  
**Total Number of Spectra:** 10  
**Number of Replicates (out of 10):** 4  
**Best Match Score:** 117.09  
**Best Match Posterior Error Probability:** 0.0001398  
**Best Match Spectrum:**

**Scan number** 1414      **Raw file** Prt-OGE-Batch2-WT-Frac9  
**Method** ITMS; CID      **Genenames** PLP2

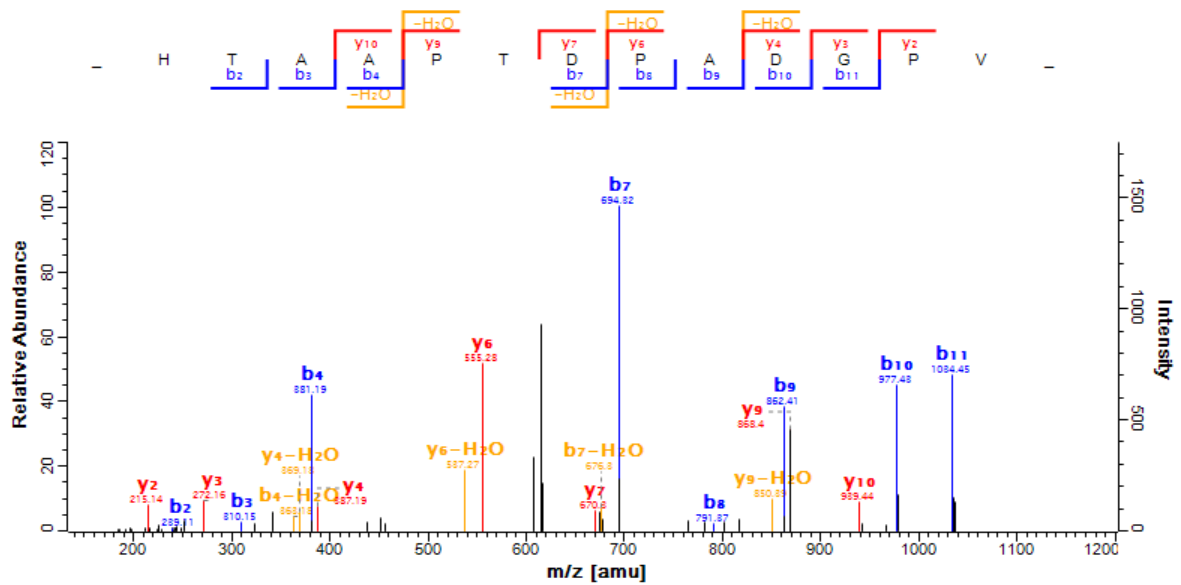



**Protein Group ID:** 2281  
**Protein Accession Numbers:** Q07352  
**Gene Names:** ZFP36L1  
**Peptide Sequence:** TTTLVSATIFDLSEVLCK  
**Total Number of Spectra:** 2  
**Number of Replicates (out of 10):** 1  
**Best Match Score:** 79.514  
**Best Match Posterior Error Probability:** 0.0011553  
**Best Match Spectrum:**

**Scan number** 8905      **Raw file** 20100930-KD-Batch5-Prt-OGE-WT-Frac22  
**Method** ITMS; CID      **Genenames** ZFP36L1

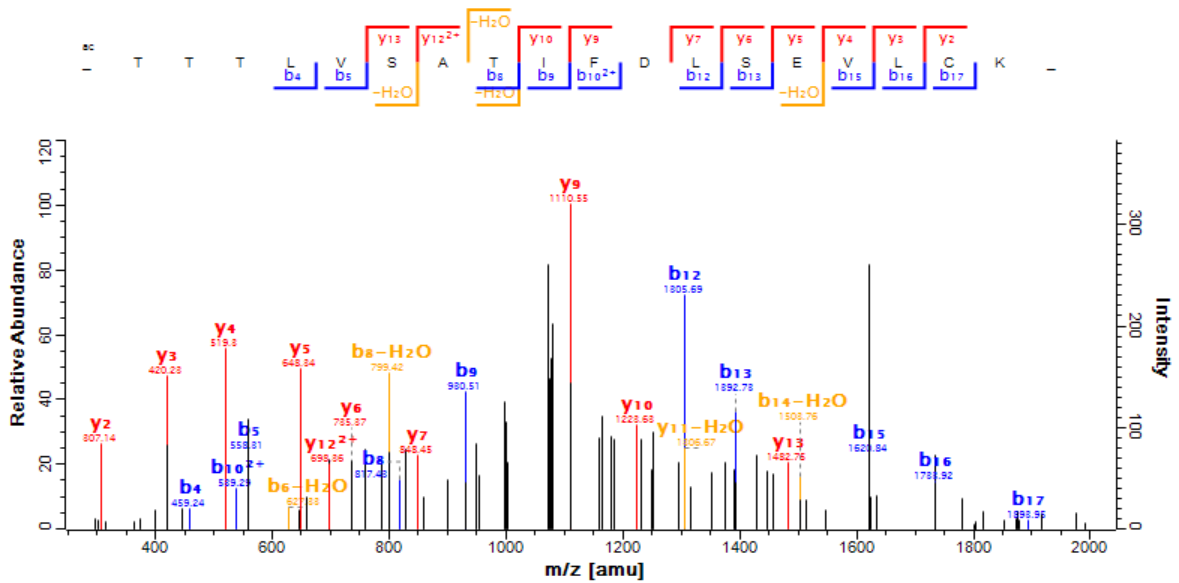

**Protein Group ID:** 2293

**Protein Accession Numbers:** Q08499; Q08499-11; Q08499-6; Q08499-9; Q08499-10; Q08499-2; Q08499-3; Q08499-12; Q08499-7

**Gene Names:** PDE4D

**Peptide Sequence:** NSSIASDIHGDDLIVTPFAQLV

**Total Number of Spectra:** 15

**Number of Replicates (out of 10):** 7

**Best Match Score:** 119.27

**Best Match Posterior Error Probability:** 1.15E-16

**Best Match Spectrum:**

|                    |           |                  |                                      |
|--------------------|-----------|------------------|--------------------------------------|
| <b>Scan number</b> | 7899      | <b>Raw file</b>  | 20100930-KD-Batch5-Prt-OGE-WT-Frac15 |
| <b>Method</b>      | ITMS: CID | <b>Genenames</b> | PDE4D                                |

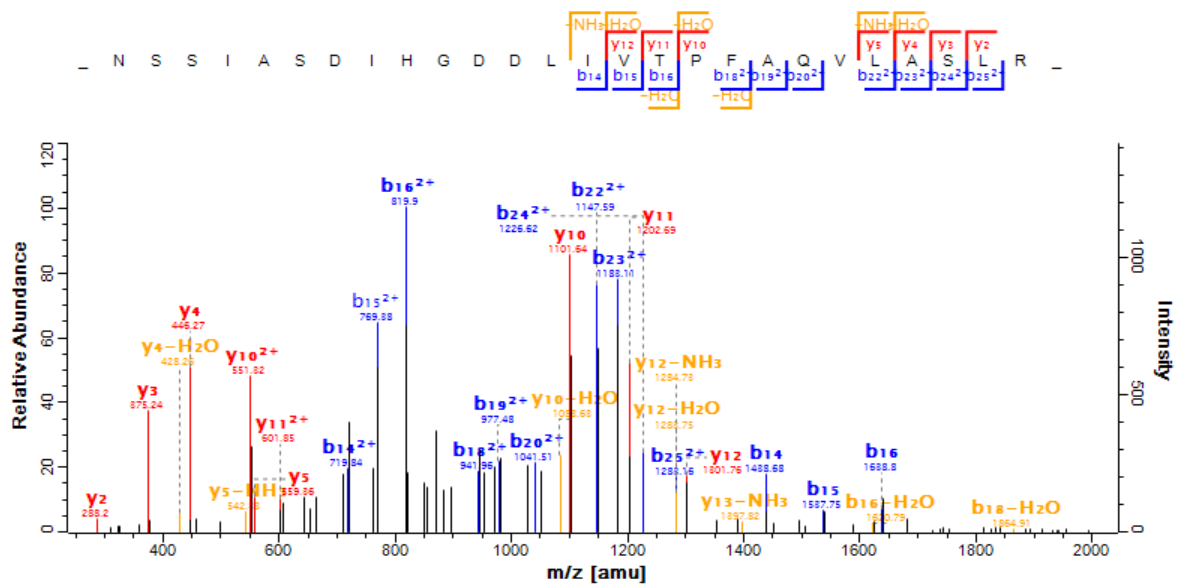

**Protein Group ID:** 2302  
**Protein Accession Numbers:** Q0VVDG4; Q0VVDG4-2  
**Gene Names:** SCR3  
**Peptide Sequence:** GNITFETMMEILR  
**Total Number of Spectra:** 8  
**Number of Replicates (out of 10):** 7  
**Best Match Score:** 115.06  
**Best Match Posterior Error Probability:** 0.0001623  
**Best Match Spectrum:**

**Scan number** 6974      **Raw file** 20100917-KD-Batch5-Prt-OGE-Mock-Frac10  
**Method** ITMS; CID      **Genenames** SCR3

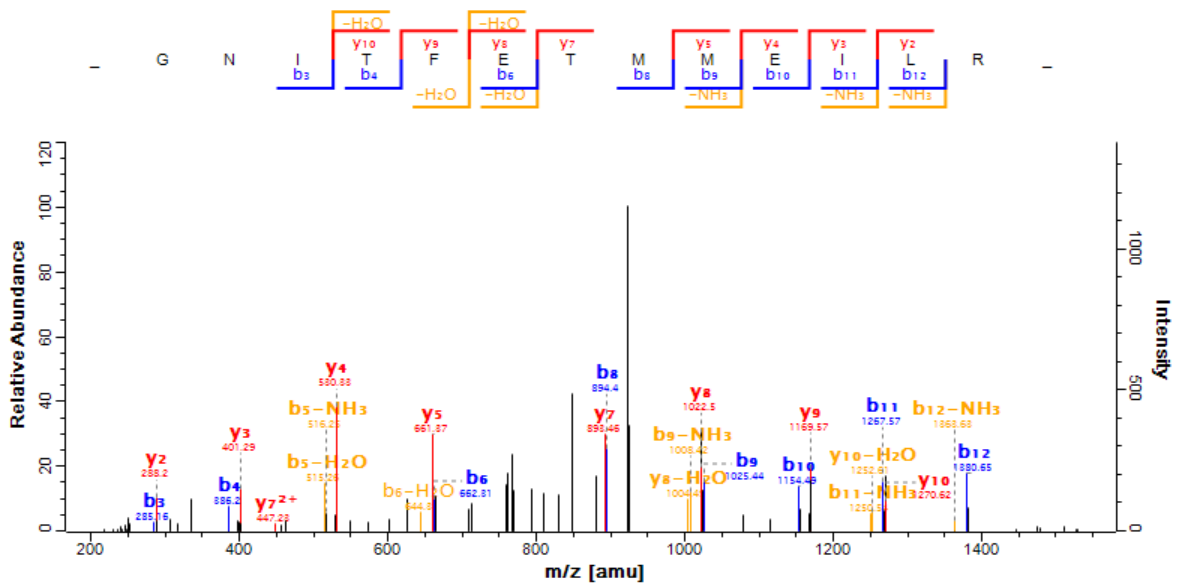

**Protein Group ID:** 2306

**Protein Accession Numbers:** Q12834

**Gene Names:** CDC20

**Peptide Sequence:** AQFAFESDLHSLQLDAPLNAPPAR

**Total Number of Spectra:** 1

**Number of Replicates (out of 10):** 1

**Best Match Score:** 73.546

**Best Match Posterior Error Probability:** 4.59E-05

**Best Match Spectrum:**

**Scan number** 6509      **Raw file** Prt-OGE-Batch2-WT-Frac21  
**Method** ITMS; CID      **Genenames** CDC20

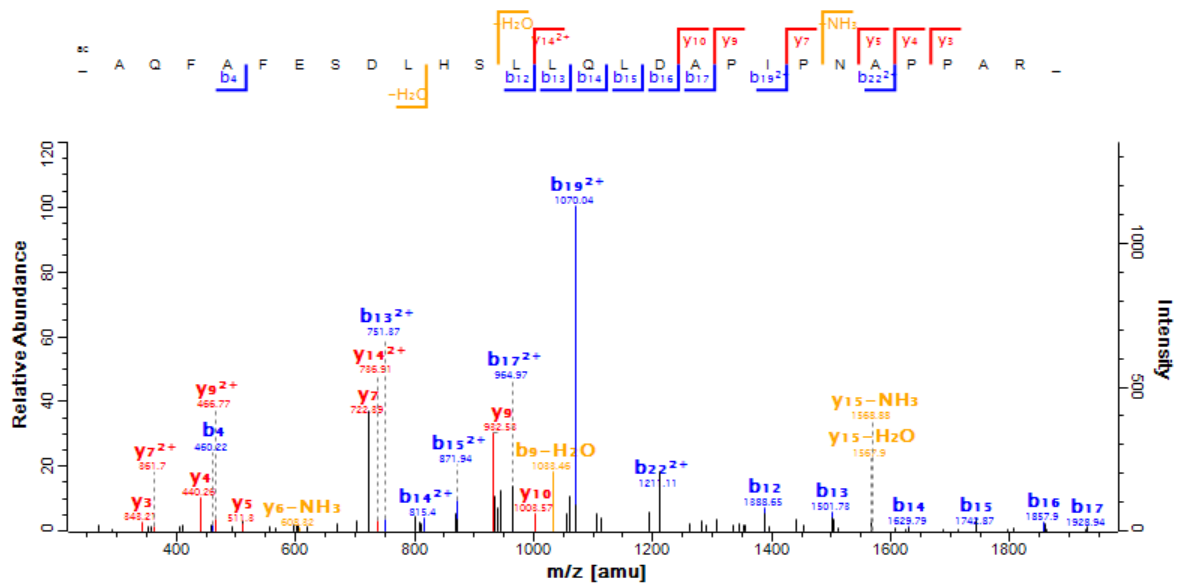

**Protein Group ID:** 2312  
**Protein Accession Numbers:** Q12913  
**Gene Names:** PTPRJ  
**Peptide Sequence:** SPDGASEYVYHLVIESK  
**Total Number of Spectra:** 1  
**Number of Replicates (out of 10):** 1  
**Best Match Score:** 79.337  
**Best Match Posterior Error Probability:** 0.0012195  
**Best Match Spectrum:**

**Scan number** 4180      **Raw file** OGE-WT-Frac3  
**Method** ITMS; CID      **Genenames** PTPRJ

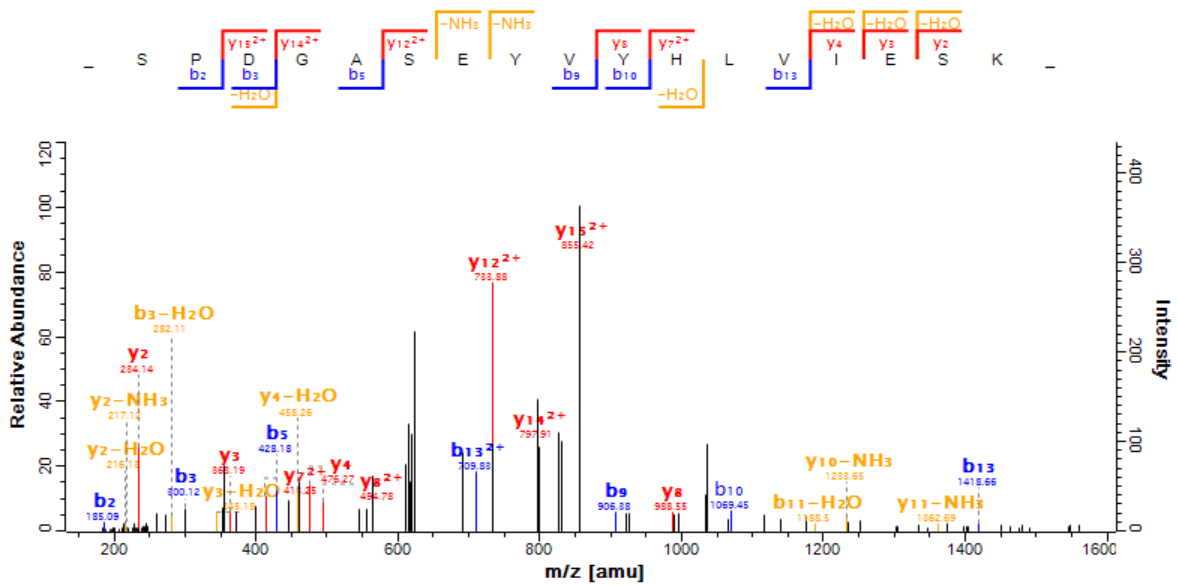

**Protein Group ID:** 2314  
**Protein Accession Numbers:** Q12974; Q12974-3  
**Gene Names:** PTP4A2  
**Peptide Sequence:** APVLVALIECGMK  
**Total Number of Spectra:** 1  
**Number of Replicates (out of 10):** 1  
**Best Match Score:** 94.551  
**Best Match Posterior Error Probability:** 0.00022088  
**Best Match Spectrum:**

**Scan number** 7078      **Raw file** 20100917-KD-Batch5-Prt-OGE-Mock-Frac20  
**Method** ITMS; CID      **Genenames** PTP4A2

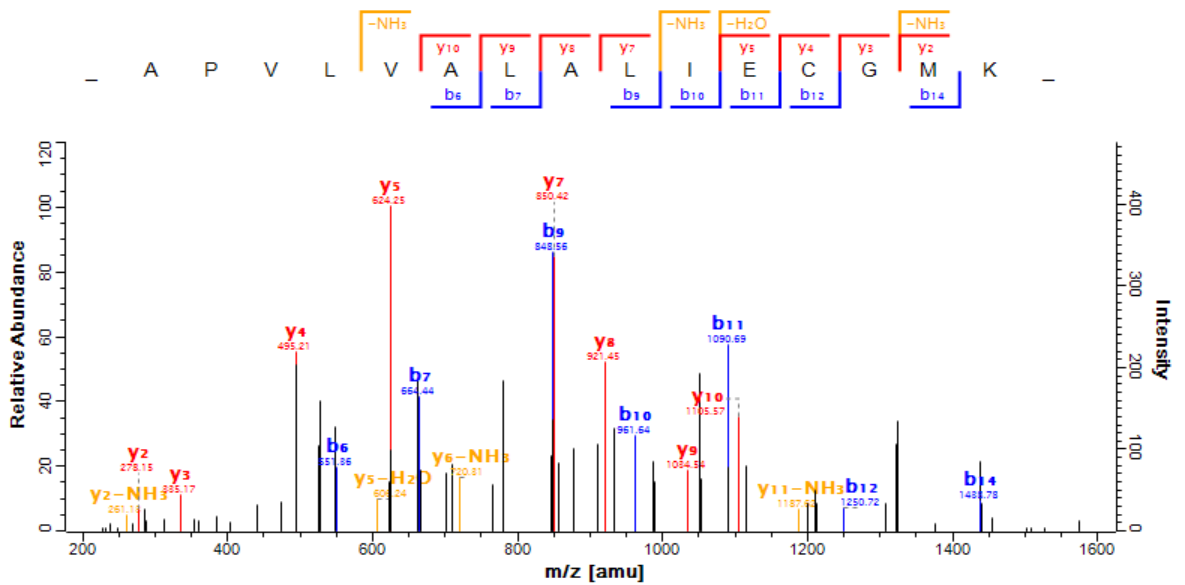

**Protein Group ID:** 2318  
**Protein Accession Numbers:** Q13017; Q13017-2  
**Gene Names:** ARHGAP5  
**Peptide Sequence:** VPLAHPEDMDPSDNYAEPIIDTIFFK  
**Total Number of Spectra:** 1  
**Number of Replicates (out of 10):** 1  
**Best Match Score:** 99.569  
**Best Match Posterior Error Probability:** 4.20E-07  
**Best Match Spectrum:**

**Scan number** 4654      **Raw file** Prt-OGE-Batch2-WT-Frac13  
**Method** ITMS; CID      **Genenames** ARHGAP5

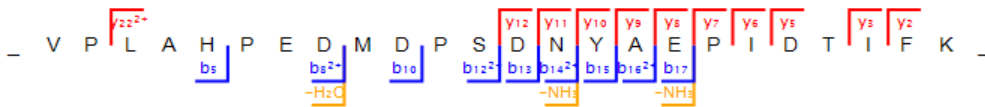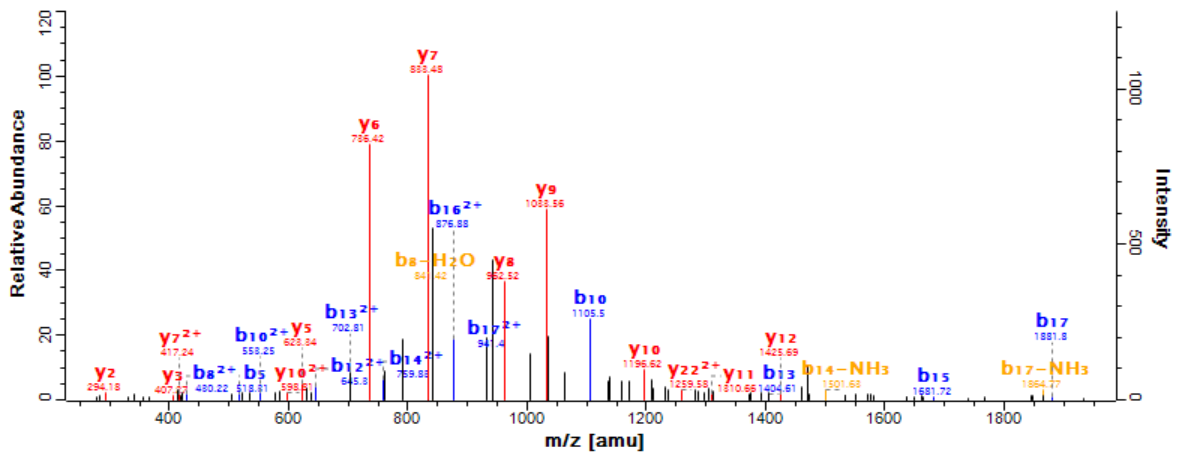

**Protein Group ID:** 2365  
**Protein Accession Numbers:** Q13825; Q13825-2  
**Gene Names:** AUH  
**Peptide Sequence:** AVGLISHVLEQNQEGDAAYR  
**Total Number of Spectra:** 1  
**Number of Replicates (out of 10):** 1  
**Best Match Score:** 79.393  
**Best Match Posterior Error Probability:** 0.0010352  
**Best Match Spectrum:**

**Scan number** 3296      **Raw file** 20100914-KD-Batch4-Prt-OGE-Mock-Frac21  
**Method** ITMS; CID      **Genenames** AUH

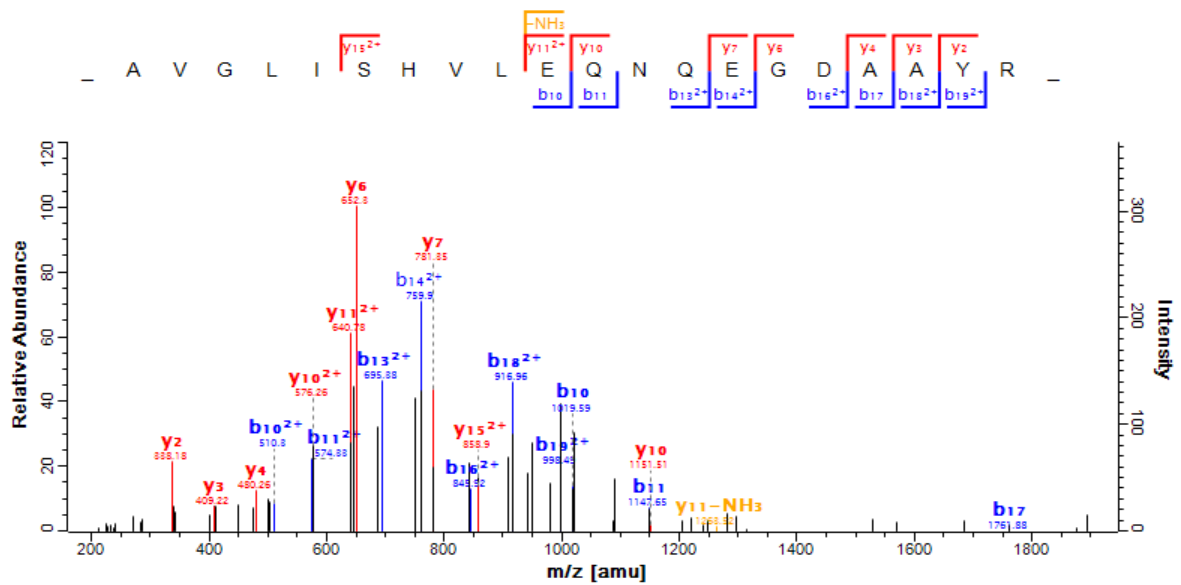



**Protein Group ID:** 2368

**Protein Accession Numbers:** Q13901

**Gene Names:** CID

**Peptide Sequence:** AGEEINEDYPVEIHEYLSAFENSIGAVDEMLLK

**Total Number of Spectra:** 1

**Number of Replicates (out of 10):** 1

**Best Match Score:** 68.386

**Best Match Posterior Error Probability:** 4.65E-07

**Best Match Spectrum:**

**Scan number** 7315      **Raw file** Prt-OGE-Batch2-WT-Frac21  
**Method** ITMS; CID      **Genenames** CID

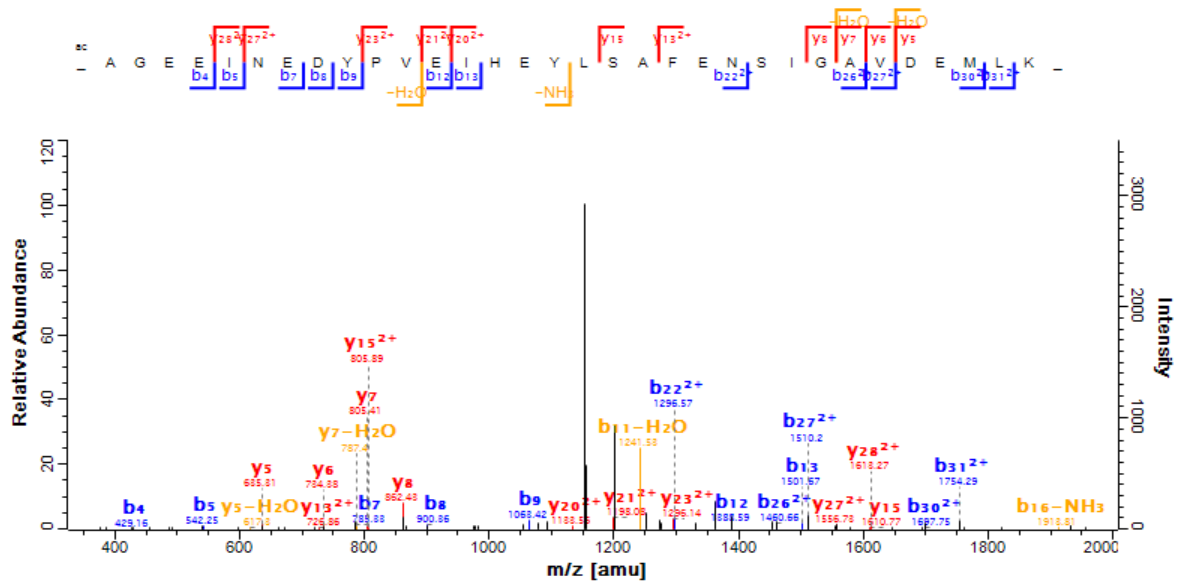

**Protein Group ID:** 2378

**Protein Accession Numbers:** Q14137; Q96Q25

**Gene Names:** BOP1;KM-PA-2

**Peptide Sequence:** DLGVLDFVIFHP TQPWPVFS SGA DGT V R

**Total Number of Spectra:** 2

**Number of Replicates (out of 10):** 2

**Best Match Score:** 95.835

**Best Match Posterior Error Probability:** 2.34E-08

**Best Match Spectrum:**

|                    |           |                  |               |
|--------------------|-----------|------------------|---------------|
| <b>Scan number</b> | 6864      | <b>Raw file</b>  | OGE-WT-Frac16 |
| <b>Method</b>      | ITMS; CID | <b>Genenames</b> | BOP1;KM-PA-2  |

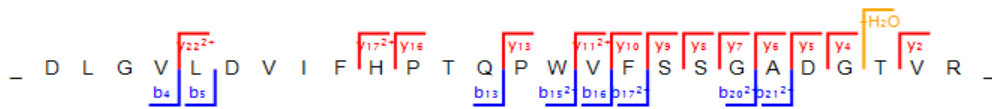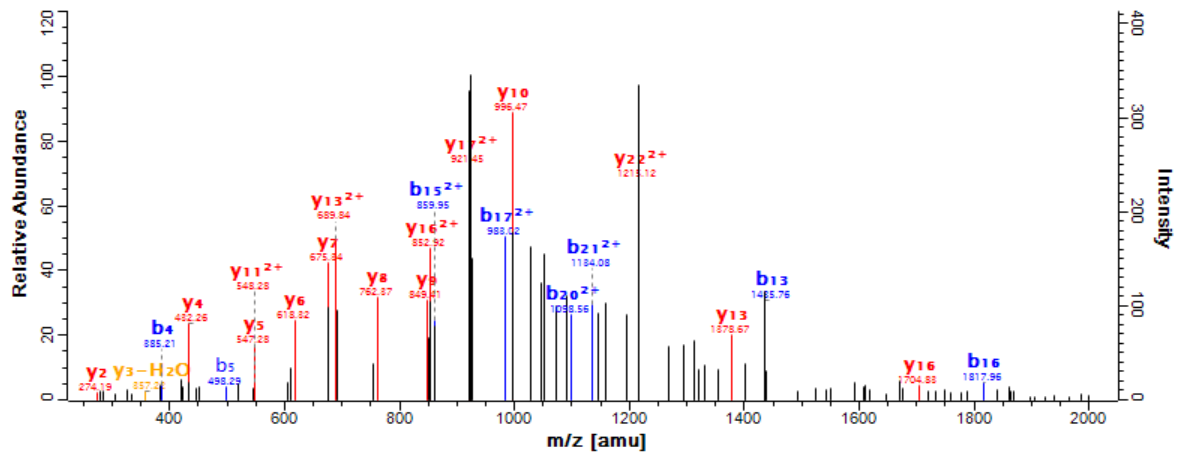

**Protein Group ID:** 2380  
**Protein Accession Numbers:** Q14160-3; Q14160  
**Gene Names:** SCRIB  
**Peptide Sequence:** LPPEVANFMQLVELDVSR  
**Total Number of Spectra:** 8  
**Number of Replicates (out of 10):** 6  
**Best Match Score:** 104.2  
**Best Match Posterior Error Probability:** 0.00017998  
**Best Match Spectrum:**

**Scan number** 7682      **Raw file** 20100927-KD-Batch4-Prt-OGE-WT-Frac7  
**Method** ITMS; CID      **Genenames** SCRIB

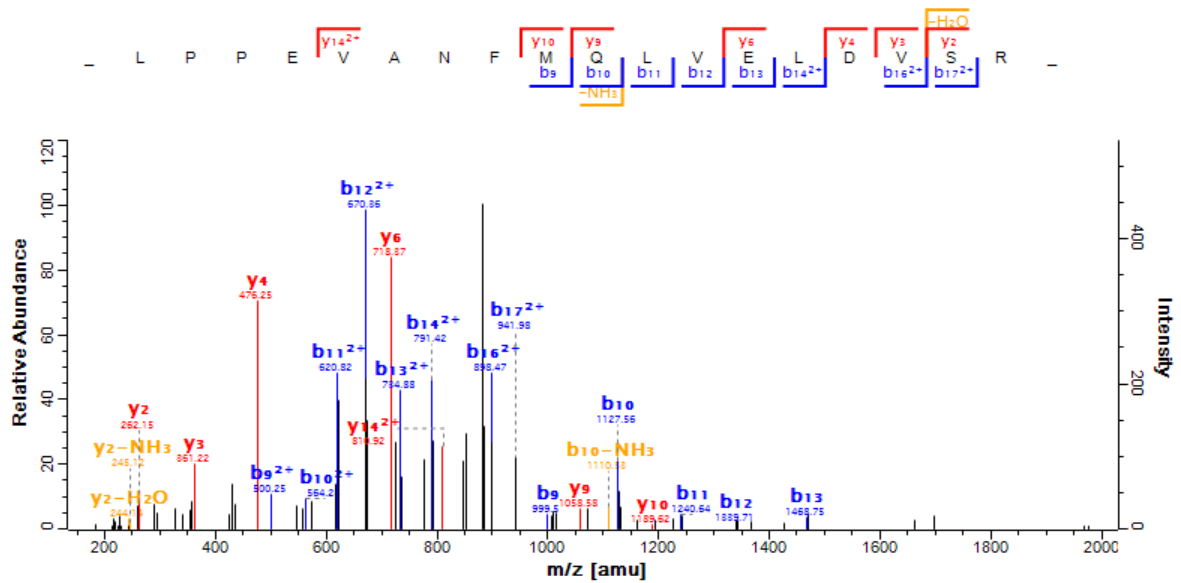

**Protein Group ID:** 2417  
**Protein Accession Numbers:** Q15024  
**Gene Names:** EXOSC7  
**Peptide Sequence:** VYIVHGVQEDLR  
**Total Number of Spectra:** 4  
**Number of Replicates (out of 10):** 4  
**Best Match Score:** 113.69  
**Best Match Posterior Error Probability:** 0.00020615  
**Best Match Spectrum:**

**Scan number** 2443      **Raw file** Prt-OGE-Batch2-WT-Frac6  
**Method** ITMS; CID      **Genenames** EXOSC7

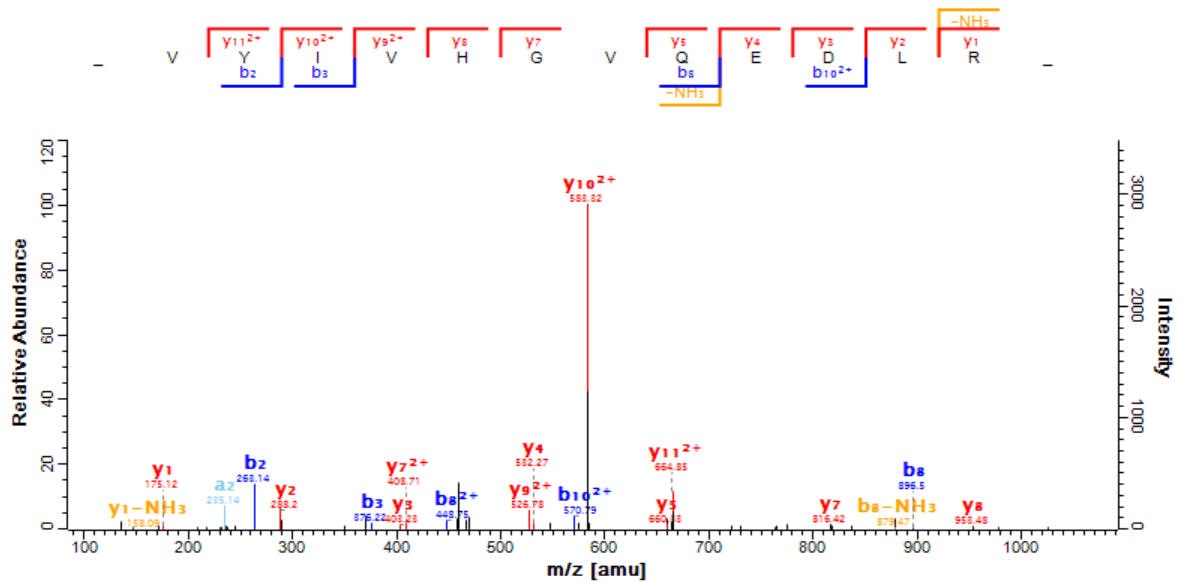

**Protein Group ID:** 2418  
**Protein Accession Numbers:** Q15042-2  
**Gene Names:**  
**Peptide Sequence:** MTPPEEELK  
**Total Number of Spectra:** 11  
**Number of Replicates (out of 10):** 8  
**Best Match Score:** 122.13  
**Best Match Posterior Error Probability:** 0.00049598  
**Best Match Spectrum:**

**Scan number** 5105      **Raw file** Prt-OGE-Batch3-Mock-Frac4  
**Method** ITMS; CID      **Pepti...** 122.13

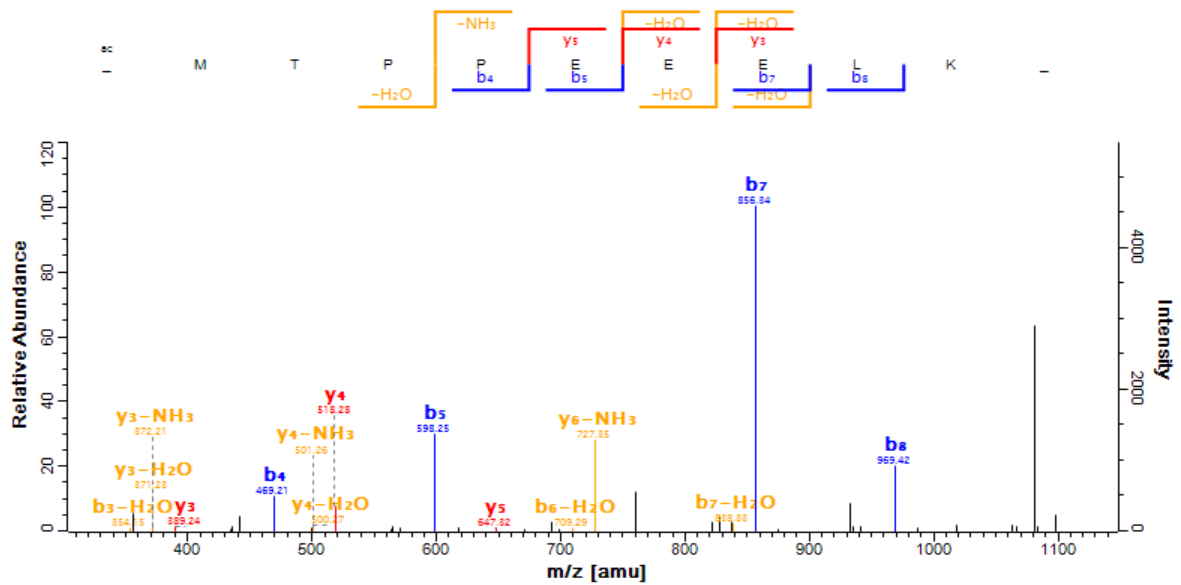

**Protein Group ID:** 2461  
**Protein Accession Numbers:** Q15814  
**Gene Names:** TBCC  
**Peptide Sequence:** LINDSVFFLAAYDLR  
**Total Number of Spectra:** 1  
**Number of Replicates (out of 10):** 1  
**Best Match Score:** 79.771  
**Best Match Posterior Error Probability:** 0.0010519  
**Best Match Spectrum:**

**Scan number** 7029      **Raw file** Prt-OGE-Batch3-Mock-Frac9  
**Method** ITMS; CID      **Genenames** TBCC

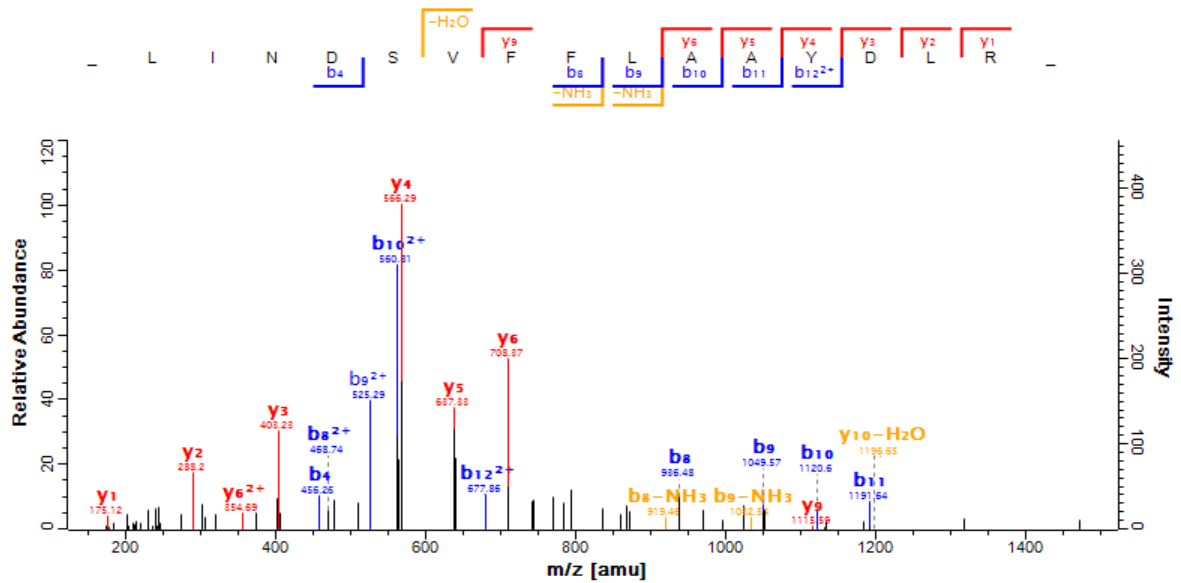

**Protein Group ID:** 2463  
**Protein Accession Numbers:** Q15843  
**Gene Names:** NEDD8  
**Peptide Sequence:** ILGGSVLHLVLALR  
**Total Number of Spectra:** 15  
**Number of Replicates (out of 10):** 5  
**Best Match Score:** 141.38  
**Best Match Posterior Error Probability:** 2.11E-17  
**Best Match Spectrum:**

**Scan number** 6712      **Raw file** 20100917-KD-Batch5-Prt-OGE-Mock-Frac16  
**Method** ITMS; CID      **Genenames** NEDD8

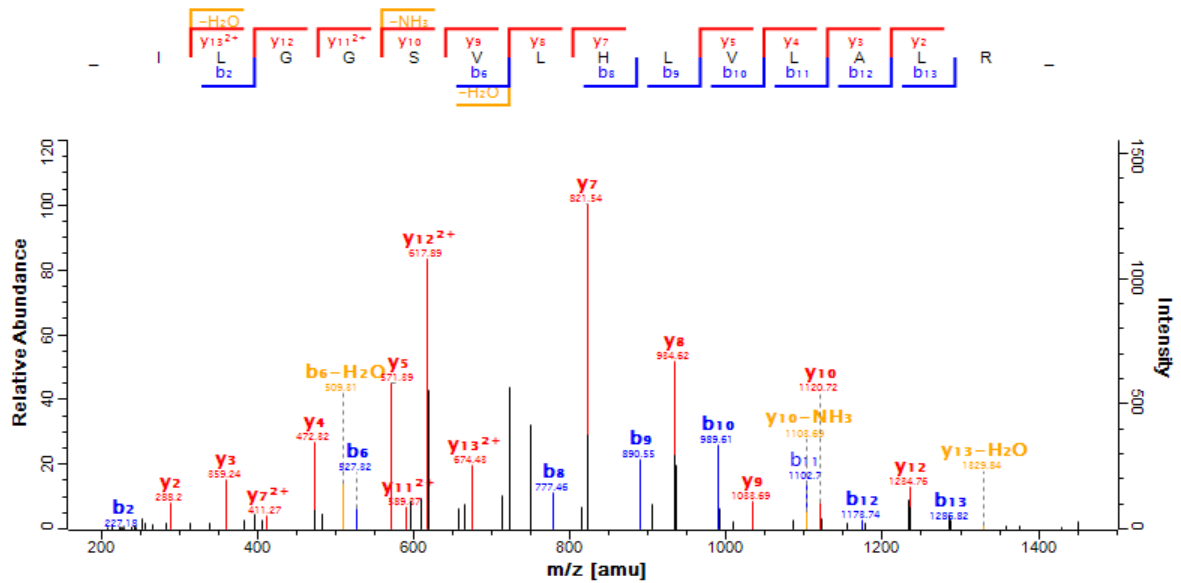

**Protein Group ID:** 2464

**Protein Accession Numbers:** Q15853; Q15853-2; Q15853-3; Q6YI47

**Gene Names:** USF2

**Peptide Sequence:** AQLQQHNL**EMV**GEGTR

**Total Number of Spectra:** 7

**Number of Replicates (out of 10):** 7

**Best Match Score:** 171.21

**Best Match Posterior Error Probability:** 1.48E-15

**Best Match Spectrum:**

|                    |           |                  |                         |
|--------------------|-----------|------------------|-------------------------|
| <b>Scan number</b> | 2037      | <b>Raw file</b>  | Prt-OGE-Batch3-WT-Frac5 |
| <b>Method</b>      | ITMS; CID | <b>Genenames</b> | USF2                    |

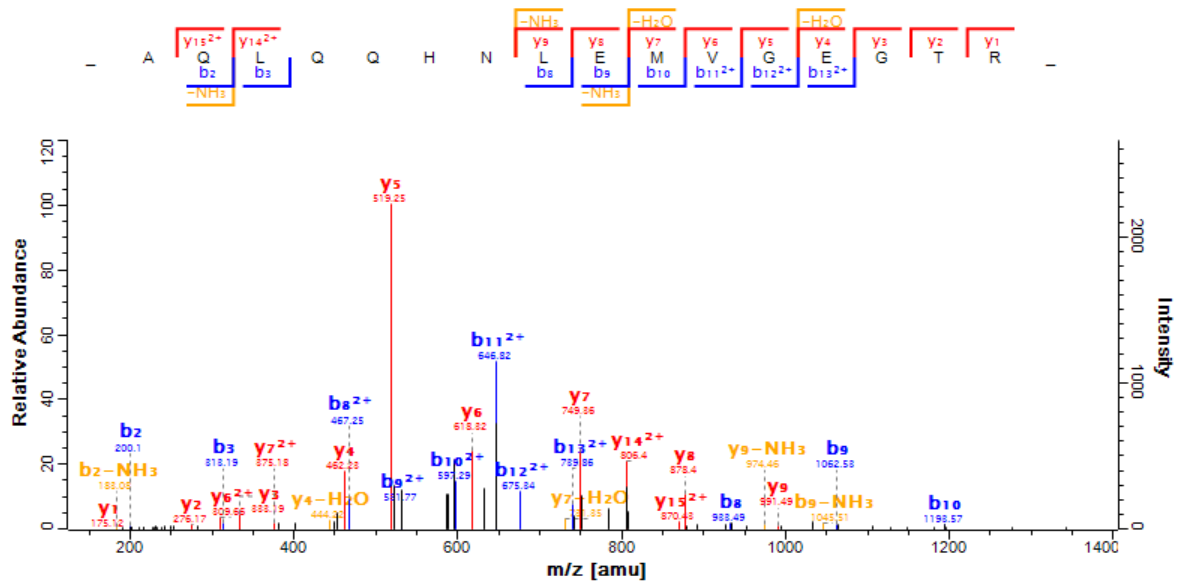



**Protein Group ID:** 2468

**Protein Accession Numbers:** Q16222; Q16222-3; Q16222-2

**Gene Names:** UAP1

**Peptide Sequence:** FVFDIFQFAK

**Total Number of Spectra:** 14

**Number of Replicates (out of 10):** 9

**Best Match Score:** 129.7

**Best Match Posterior Error Probability:** 8.76E-05

**Best Match Spectrum:**

|                    |           |                  |                          |
|--------------------|-----------|------------------|--------------------------|
| <b>Scan number</b> | 5463      | <b>Raw file</b>  | Prt-OGE-Batch3-WT-Frac12 |
| <b>Method</b>      | ITMS; CID | <b>Genenames</b> | UAP1                     |

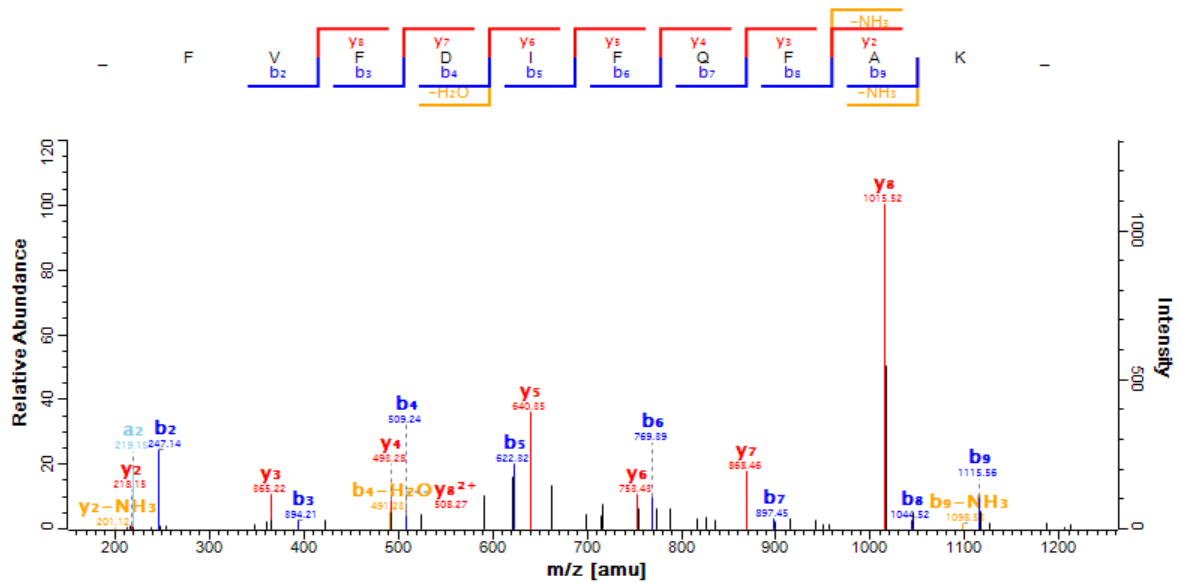

**Protein Group ID:** 2483

**Protein Accession Numbers:** Q16763

**Gene Names:** UBE2S

**Peptide Sequence:** ALASGTEASSTDPGAPGGPGGAEGPMAK

**Total Number of Spectra:** 4

**Number of Replicates (out of 10):** 4

**Best Match Score:** 134.76

**Best Match Posterior Error Probability:** 4.91E-28

**Best Match Spectrum:**

**Scan number** 2534      **Raw file** 20100930-KD-Batch5-Prt-OGE-WT-Frac18  
**Method** ITMS; CID      **Genenames** UBE2S

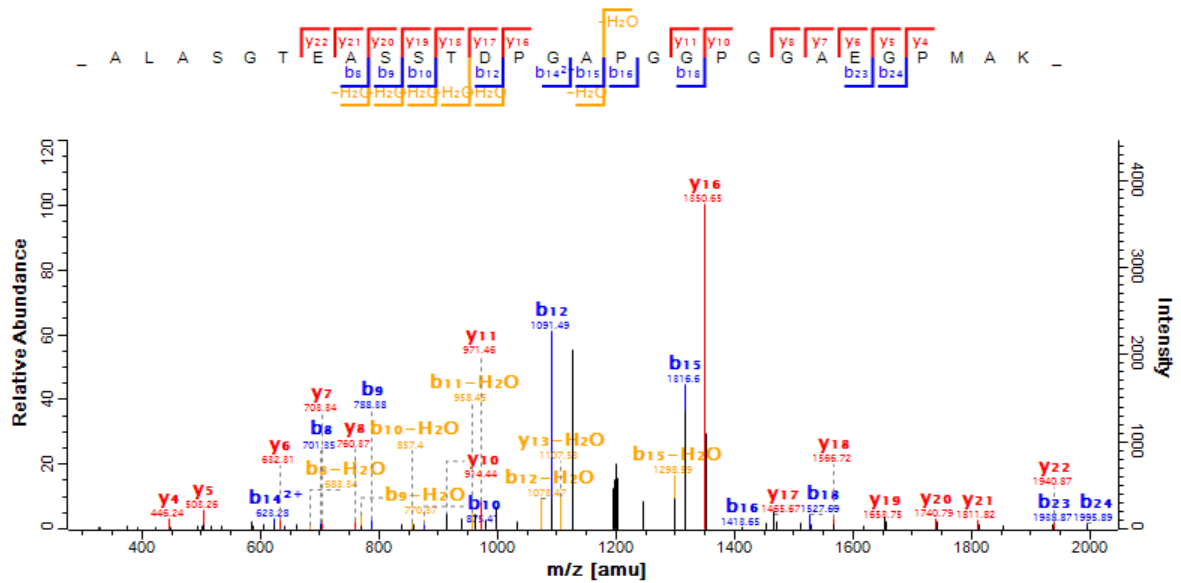

**Protein Group ID:** 2492  
**Protein Accession Numbers:** Q2KHT3; Q2KHT3-2  
**Gene Names:** CLEC16A  
**Peptide Sequence:** TITLNVYK  
**Total Number of Spectra:** 10  
**Number of Replicates (out of 10):** 6  
**Best Match Score:** 111.17  
**Best Match Posterior Error Probability:** 0.0015941  
**Best Match Spectrum:**

**Scan number** 2231      **Raw file** 20100927-KD-Batch4-Prt-OGE-WT-Frac12  
**Method** ITMS; CID      **Genenames** CLEC16A

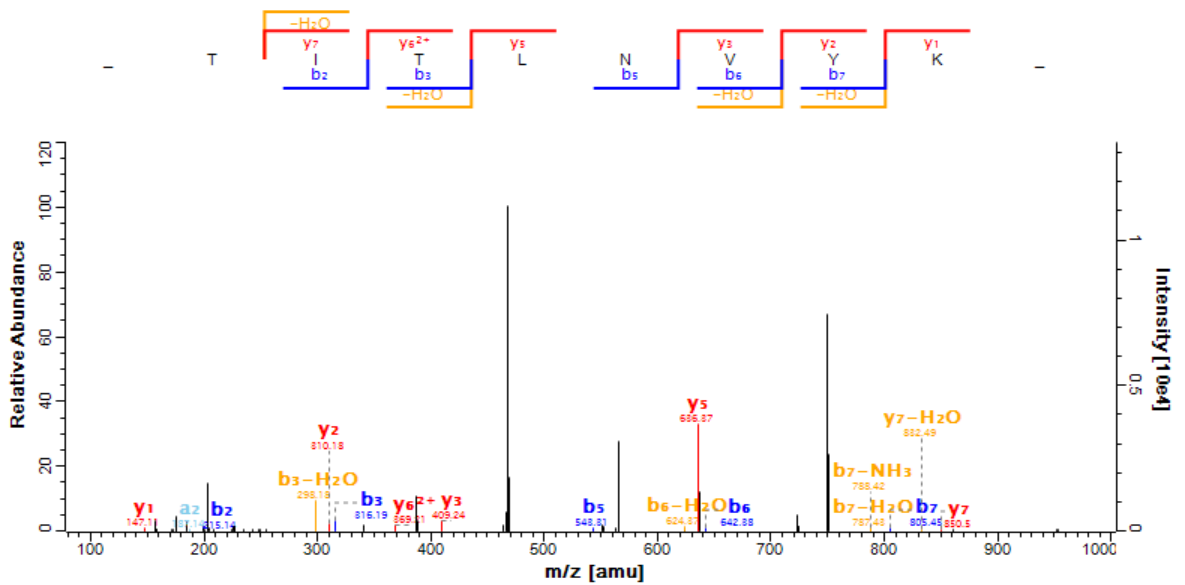

**Protein Group ID:** 2493  
**Protein Accession Numbers:** Q2NL82  
**Gene Names:** TSR1  
**Peptide Sequence:** SQDTVLMNLYK  
**Total Number of Spectra:** 1  
**Number of Replicates (out of 10):** 1  
**Best Match Score:** 111.86  
**Best Match Posterior Error Probability:** 0.001508  
**Best Match Spectrum:**

**Scan number** 3911      **Raw file** 20100930-KD-Batch5-Prt-OGE-WT-Frac17  
**Method** ITMS; CID      **Genenames** TSR1

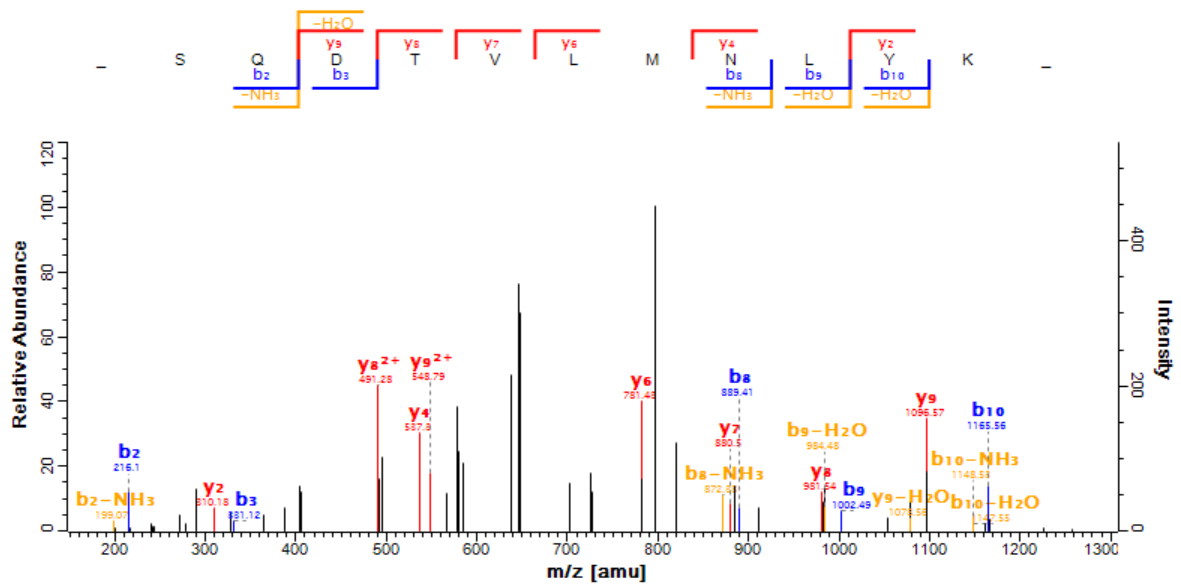

**Protein Group ID:** 2500  
**Protein Accession Numbers:** Q3SY69; Q3SY69-3  
**Gene Names:** ALDH1L2  
**Peptide Sequence:** VIWAGILSNVPIIEDSTDFK  
**Total Number of Spectra:** 2  
**Number of Replicates (out of 10):** 2  
**Best Match Score:** 77.899  
**Best Match Posterior Error Probability:** 0.00045243  
**Best Match Spectrum:**

**Scan number** 8293      **Raw file** 20100917-KD-Batch5-Prt-OGE-Mock-Frac11  
**Method** ITMS; CID      **Genenames** ALDH1L2

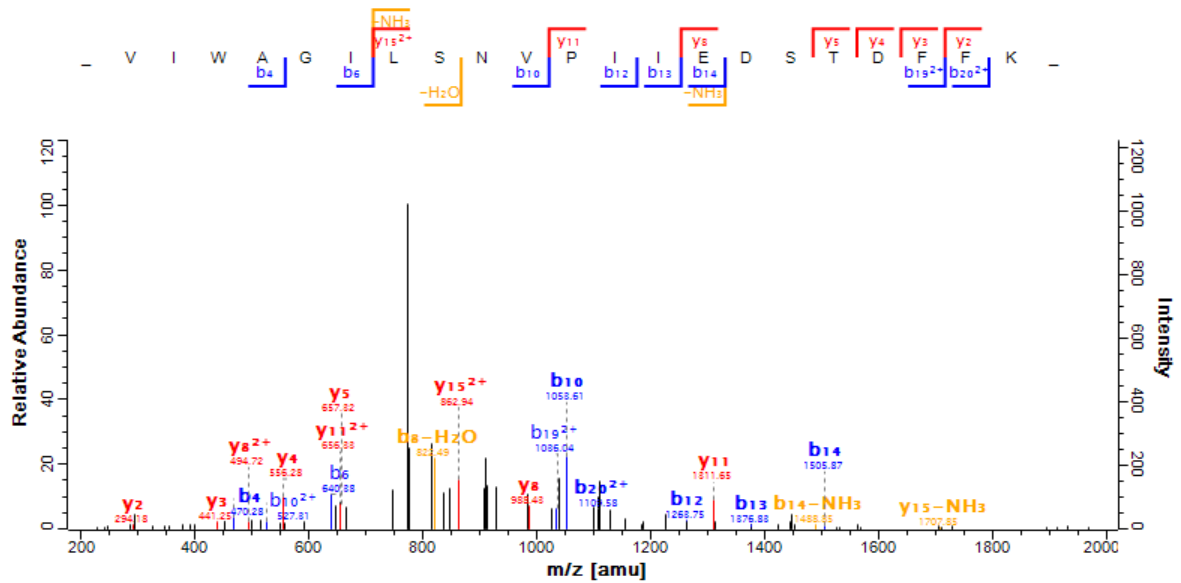

**Protein Group ID:** 2507

**Protein Accession Numbers:** Q4KWH8; Q4KWH8-2; Q4KWH8-4; Q4KWH8-3

**Gene Names:** PLCH1

**Peptide Sequence:** ILIDSIYK

**Total Number of Spectra:** 11

**Number of Replicates (out of 10):** 7

**Best Match Score:** 107.66

**Best Match Posterior Error Probability:** 0.0016793

**Best Match Spectrum:**

|                    |           |                  |                                     |
|--------------------|-----------|------------------|-------------------------------------|
| <b>Scan number</b> | 3554      | <b>Raw file</b>  | 20100927-KD-Batch4-Prt-OGE-WT-Frac4 |
| <b>Method</b>      | ITMS; CID | <b>Genenames</b> | PLCH1                               |

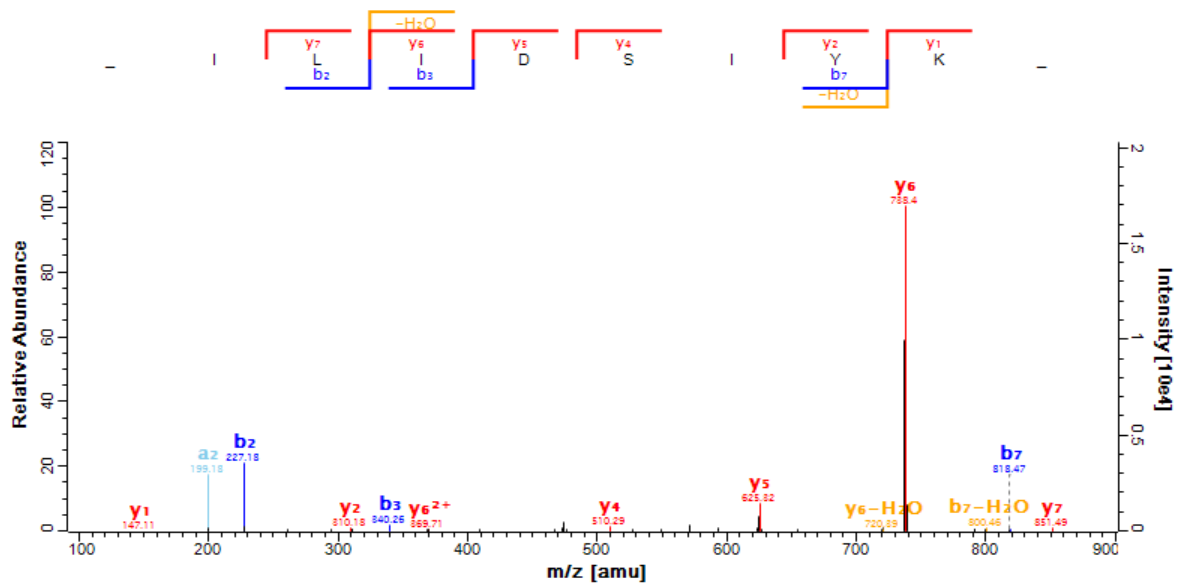

**Protein Group ID:** 2508  
**Protein Accession Numbers:** Q4U2R6  
**Gene Names:** MRPL51  
**Peptide Sequence:** AMFGVYDNI<sup>8</sup>LG<sup>8</sup>NFEK  
**Total Number of Spectra:** 2  
**Number of Replicates (out of 10):** 2  
**Best Match Score:** 89.311  
**Best Match Posterior Error Probability:** 0.00049461  
**Best Match Spectrum:**

**Scan number** 6580      **Raw file** 20100927-KD-Batch4-Prt-OGE-WT-Frac18  
**Method** ITMS; CID      **Genenames** MRPL51

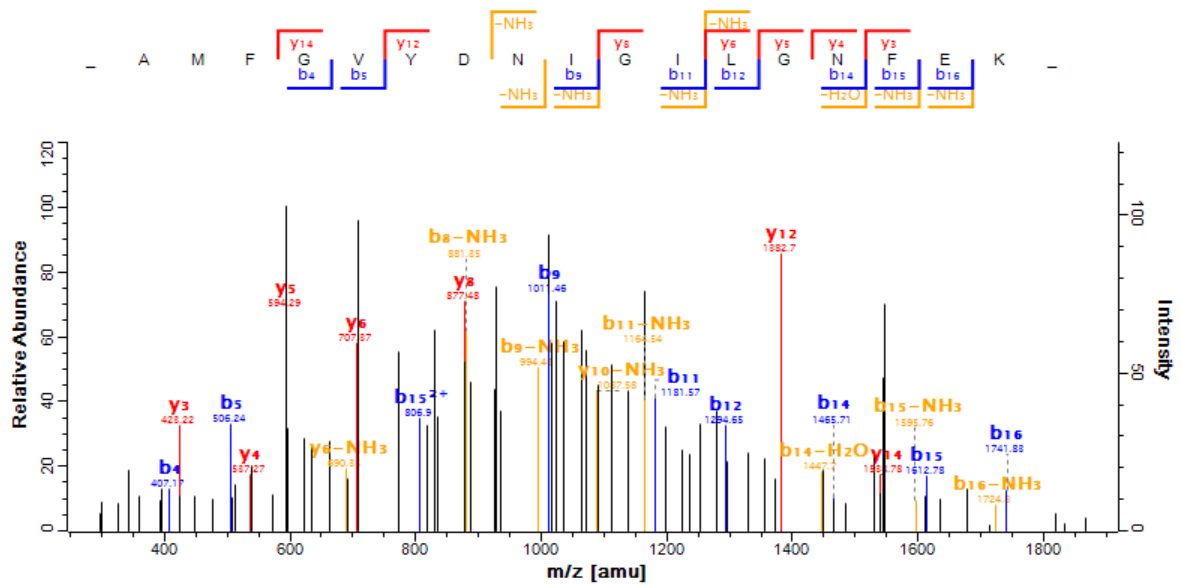

**Protein Group ID:** 2521  
**Protein Accession Numbers:** Q562R1  
**Gene Names:** ACTBL2  
**Peptide Sequence:** VAPDEHPILLTEAPLNPK  
**Total Number of Spectra:** 72  
**Number of Replicates (out of 10):** 10  
**Best Match Score:** 129.38  
**Best Match Posterior Error Probability:** 2.24E-05  
**Best Match Spectrum:**

**Scan number** 4168      **Raw file** OGE-Mock-Frac10  
**Method** ITMS; CID      **Genenames** ACTBL2

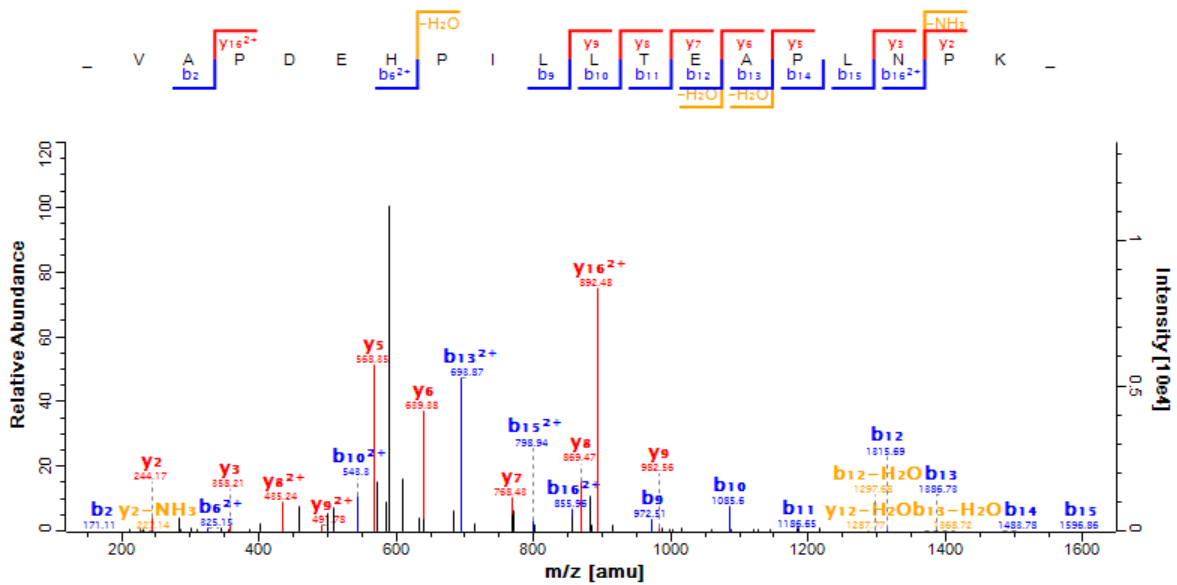



**Protein Group ID:** 2523  
**Protein Accession Numbers:** Q58FF6  
**Gene Names:** HSP90AB4P  
**Peptide Sequence:** SLINTFYSNK  
**Total Number of Spectra:** 3  
**Number of Replicates (out of 10):** 2  
**Best Match Score:** 190.53  
**Best Match Posterior Error Probability:** 5.90E-16  
**Best Match Spectrum:**

**Scan number** 4098      **Raw file** OGE-WT-Frac6  
**Method** ITMS; CID      **Genenames** HSP90AB4P

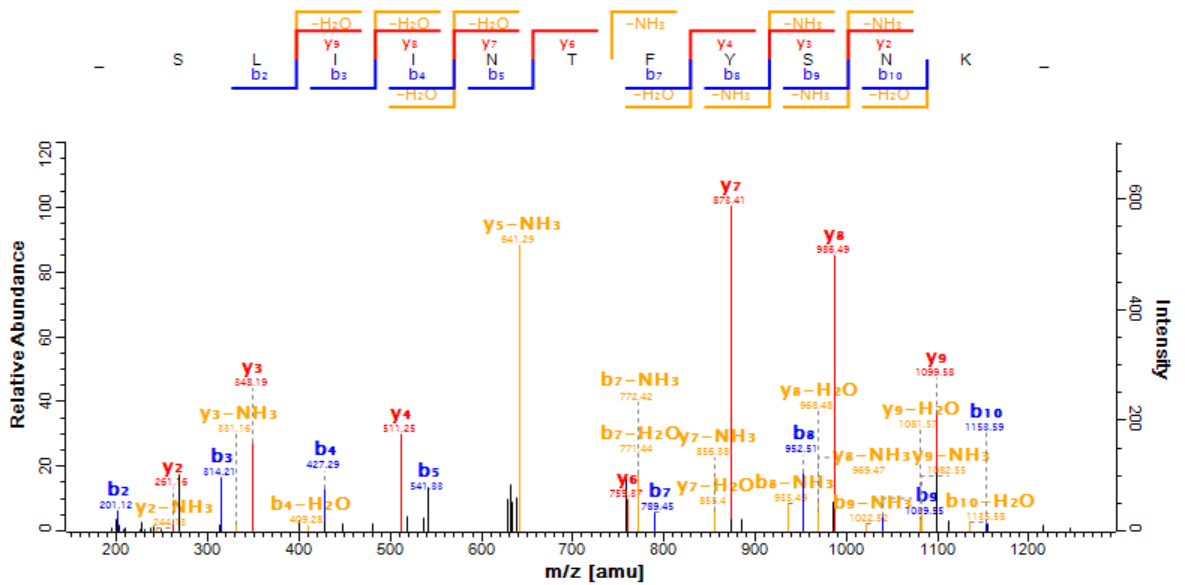

**Protein Group ID:** 2525  
**Protein Accession Numbers:** Q5BKU9  
**Gene Names:** C17orf90  
**Peptide Sequence:** ALAALEEHVADENLK  
**Total Number of Spectra:** 1  
**Number of Replicates (out of 10):** 1  
**Best Match Score:** 94.191  
**Best Match Posterior Error Probability:** 0.00023062  
**Best Match Spectrum:**

|                    |           |                  |                            |
|--------------------|-----------|------------------|----------------------------|
| <b>Scan number</b> | 3600      | <b>Raw file</b>  | Prt-OGE-Batch3--Mock-Frac7 |
| <b>Method</b>      | ITMS; CID | <b>Genenames</b> | C17orf90                   |

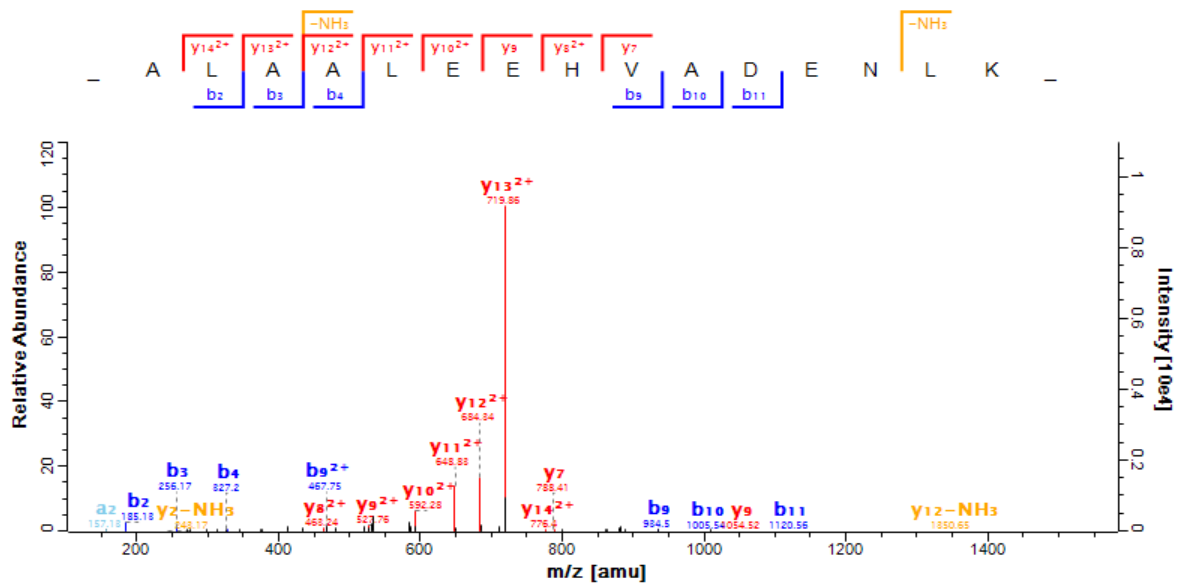

**Protein Group ID:** 2529  
**Protein Accession Numbers:** Q9Y2B9; Q5H937  
**Gene Names:** PKIG  
**Peptide Sequence:** NAVPDIQGDSEAVSVR  
**Total Number of Spectra:** 2  
**Number of Replicates (out of 10):** 2  
**Best Match Score:** 164.15  
**Best Match Posterior Error Probability:** 6.72E-15  
**Best Match Spectrum:**

**Scan number** 3668      **Raw file** OGE-Mock-Frac1  
**Method** ITMS; CID      **Genenames** PKIG

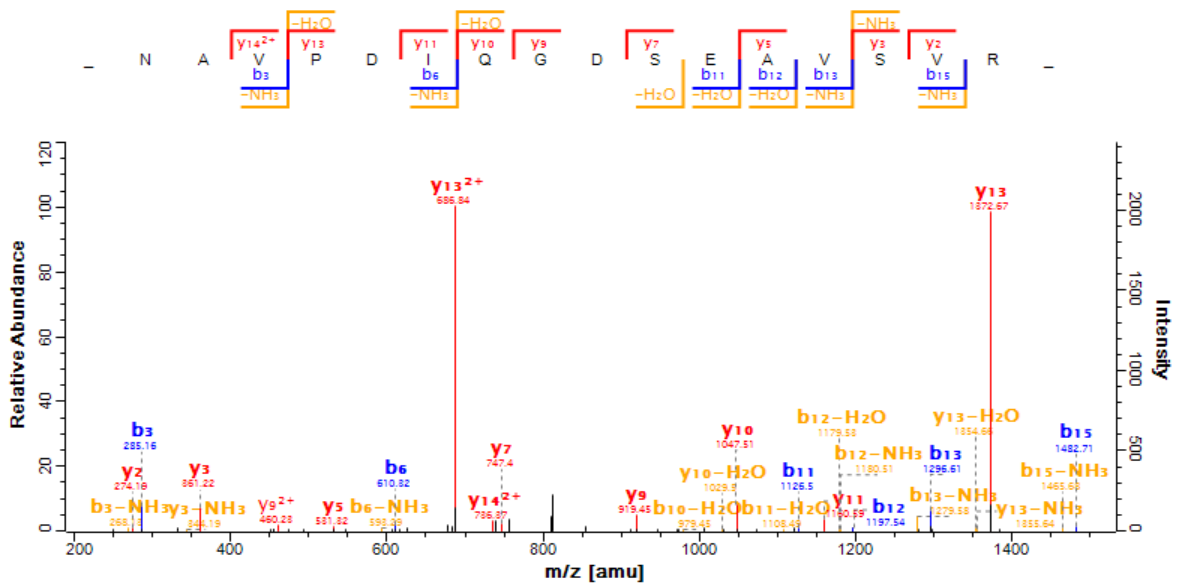

**Protein Group ID:** 2534  
**Protein Accession Numbers:** Q9UKD1; Q5JTV1  
**Gene Names:** GMEB2  
**Peptide Sequence:** DAGLLDEVIQEFHQELVETMR  
**Total Number of Spectra:** 3  
**Number of Replicates (out of 10):** 3  
**Best Match Score:** 149.52  
**Best Match Posterior Error Probability:** 7.11E-14  
**Best Match Spectrum:**

**Scan number** 9065      **Raw file** 20100927-KD-Batch4-Prt-OGE-WT-Frac9  
**Method** ITMS; CID      **Genenames** GMEB2

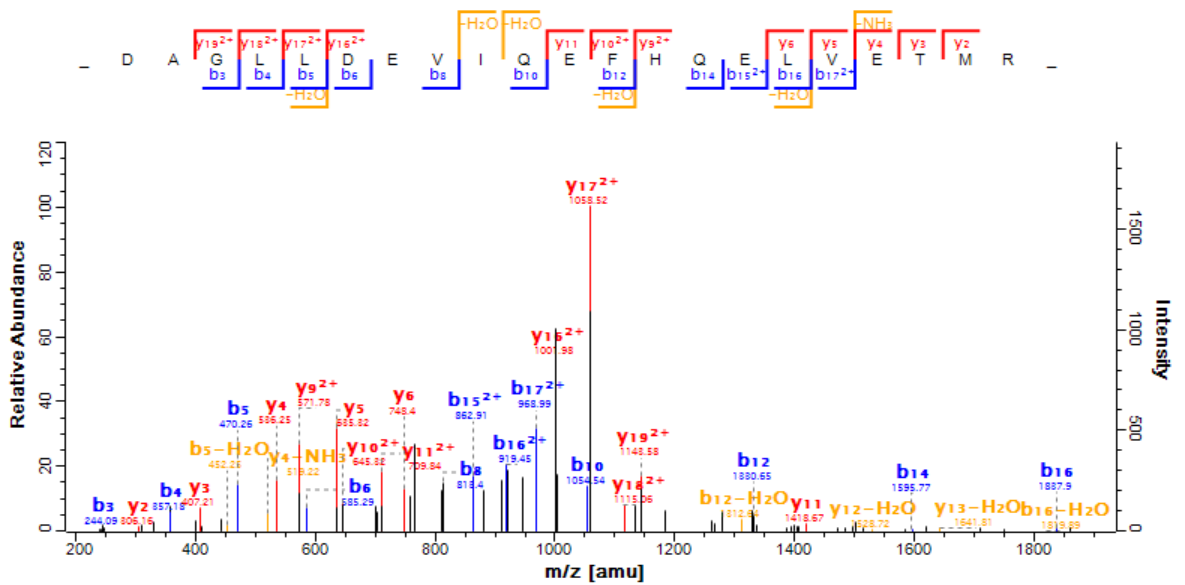

**Protein Group ID:** 2542

**Protein Accession Numbers:** Q9HB21; Q5RGS4; Q9HB21-2

**Gene Names:** PLEKHA1

**Peptide Sequence:** DNLFEIVTTSR

**Total Number of Spectra:** 1

**Number of Replicates (out of 10):** 1

**Best Match Score:** 101.53

**Best Match Posterior Error Probability:** 0.00024813

**Best Match Spectrum:**

**Scan number** 4688      **Raw file** 20100917-KD-Batch5-Prt-OGE-Mock-Frac21  
**Method** ITMS; CID      **Genenames** PLEKHA1

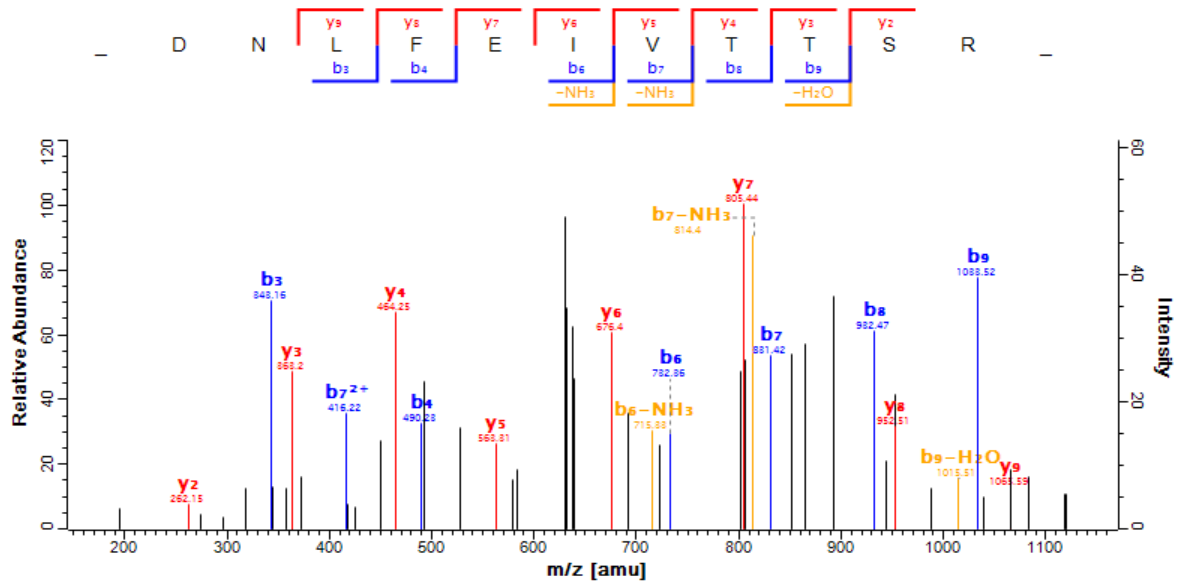

**Protein Group ID:** 2546  
**Protein Accession Numbers:** Q92558; Q5SZK5  
**Gene Names:** WASF1  
**Peptide Sequence:** FYTNPSYFFDLWK  
**Total Number of Spectra:** 2  
**Number of Replicates (out of 10):** 2  
**Best Match Score:** 140.08  
**Best Match Posterior Error Probability:** 0.0002139  
**Best Match Spectrum:**

**Scan number** 7340      **Raw file** 20100927-KD-Batch4-Prt-OGE-WT-Frac13  
**Method** ITMS; CID      **Genenames** WASF1

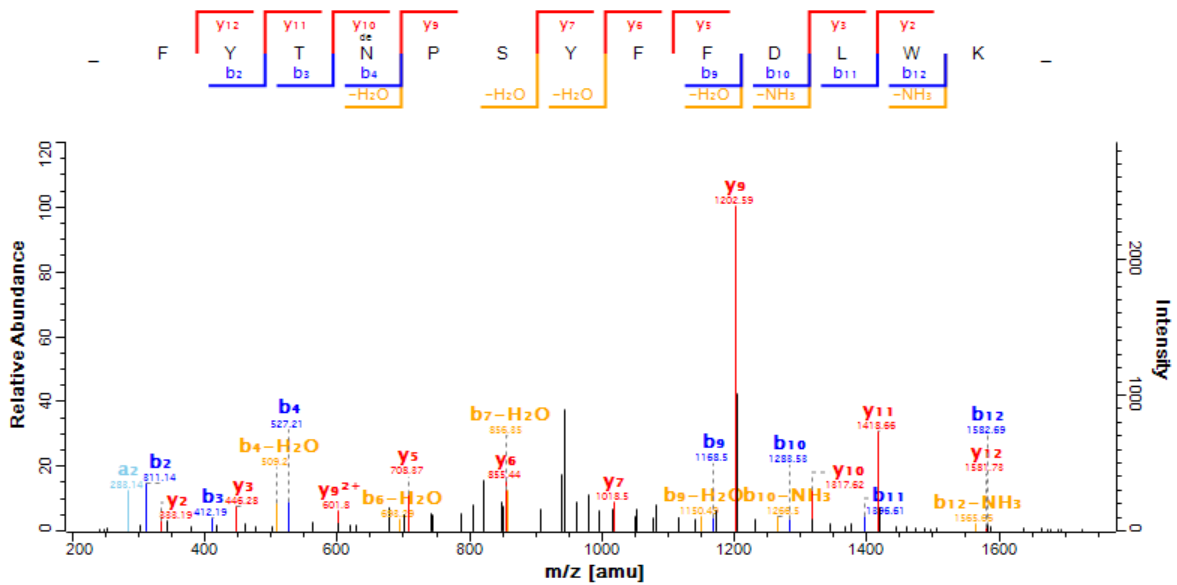

**Protein Group ID:** 2550

**Protein Accession Numbers:** Q5T6J7-2; Q5T6J7; Q5T6J8

**Gene Names:** IDNK;C9orf103

**Peptide Sequence:** STVGALLASELGWK

**Total Number of Spectra:** 1

**Number of Replicates (out of 10):** 1

**Best Match Score:** 83.087

**Best Match Posterior Error Probability:** 0.0012588

**Best Match Spectrum:**

|                    |           |                  |                            |
|--------------------|-----------|------------------|----------------------------|
| <b>Scan number</b> | 6616      | <b>Raw file</b>  | Prt-OGE-Batch3-Mock-Frac11 |
| <b>Method</b>      | ITMS; CID | <b>Genenames</b> | IDNK;C9orf103              |

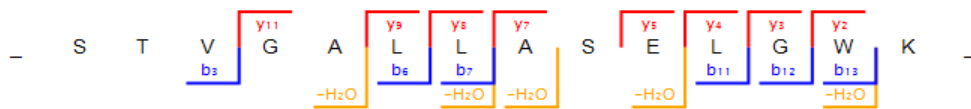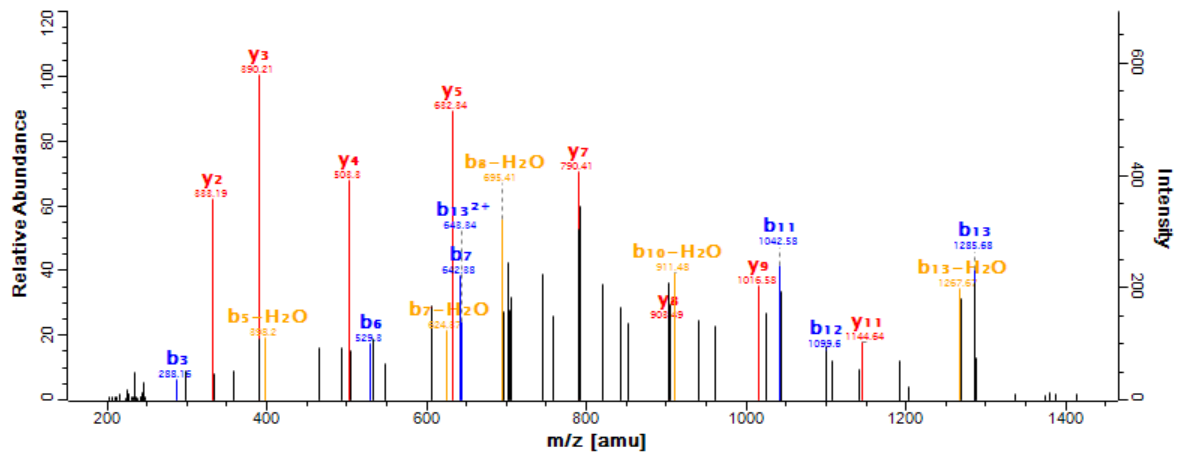

**Protein Group ID:** 2552

**Protein Accession Numbers:** Q9HD45; Q5TB53

**Gene Names:** TM9SF3;RP11-34E5.1

**Peptide Sequence:** SISYHETLGEALQGV E A L Q G V E L E F S G L D I K

**Total Number of Spectra:** 4

**Number of Replicates (out of 10):** 2

**Best Match Score:** 64.488

**Best Match Posterior Error Probability:** 0.00024663

**Best Match Spectrum:**

**Scan number** 7119      **Raw file** 20100927-KD-Batch4-Prt-OGE-WT-Frac11  
**Method** ITMS; CID      **Genenames** TM9SF3;RP11-34E5.1

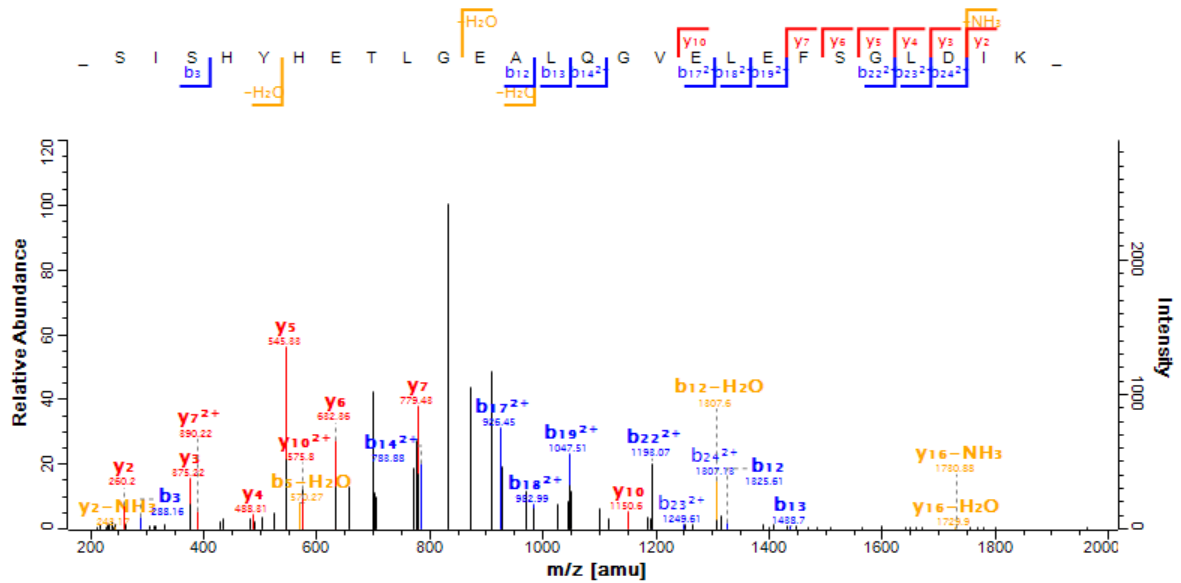



**Protein Group ID:** 2556

**Protein Accession Numbers:** Q9NWM0-6; Q9NWM0; Q9NWM0-4; Q9NWM0-2; Q5TE25; Q9NWM0-5

**Gene Names:** SMOX

**Peptide Sequence:** VVELLAEGIPAHVIQLGKPV R

**Total Number of Spectra:** 1

**Number of Replicates (out of 10):** 1

**Best Match Score:** 95.767

**Best Match Posterior Error Probability:** 9.15E-05

**Best Match Spectrum:**

|                    |           |                  |                                     |
|--------------------|-----------|------------------|-------------------------------------|
| <b>Scan number</b> | 5803      | <b>Raw file</b>  | 20100927-KD-Batch4-Prt-OGE-WT-Frac9 |
| <b>Method</b>      | ITMS; CID | <b>Genenames</b> | SMOX                                |

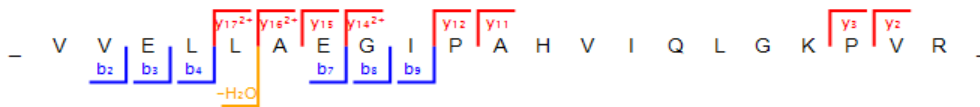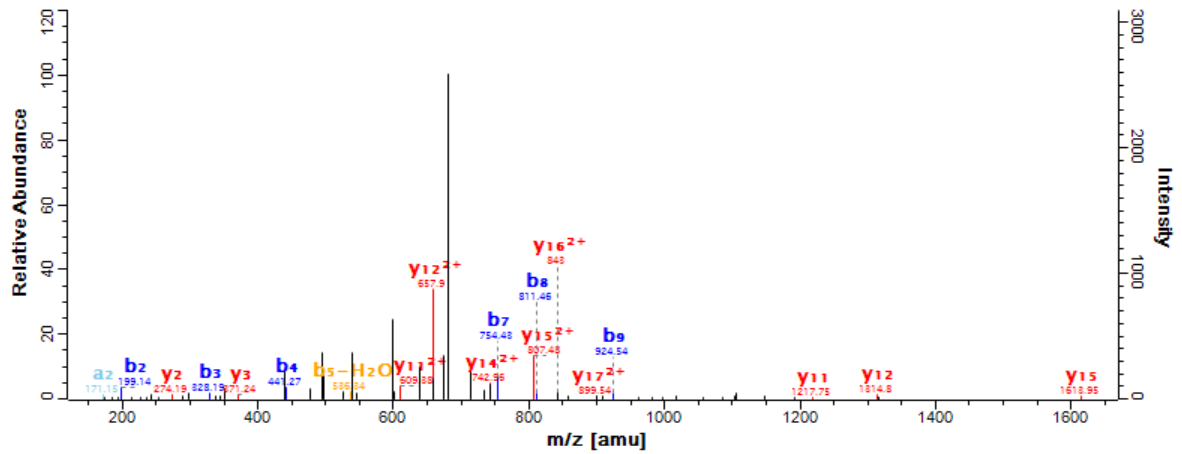

**Protein Group ID:** 2561

**Protein Accession Numbers:** Q5VT79; Q5VT79-2; E7EVD9

**Gene Names:** ANXA8L2

**Peptide Sequence:** AWIEQEGVTVK

**Total Number of Spectra:** 20

**Number of Replicates (out of 10):** 10

**Best Match Score:** 140.24

**Best Match Posterior Error Probability:** 2.15E-15

**Best Match Spectrum:**

|                    |           |                  |                                        |
|--------------------|-----------|------------------|----------------------------------------|
| <b>Scan number</b> | 2891      | <b>Raw file</b>  | 20100917-KD-Batch5-Prt-OGE-Mock-Frac11 |
| <b>Method</b>      | ITMS; CID | <b>Genenames</b> | ANXA8L2                                |

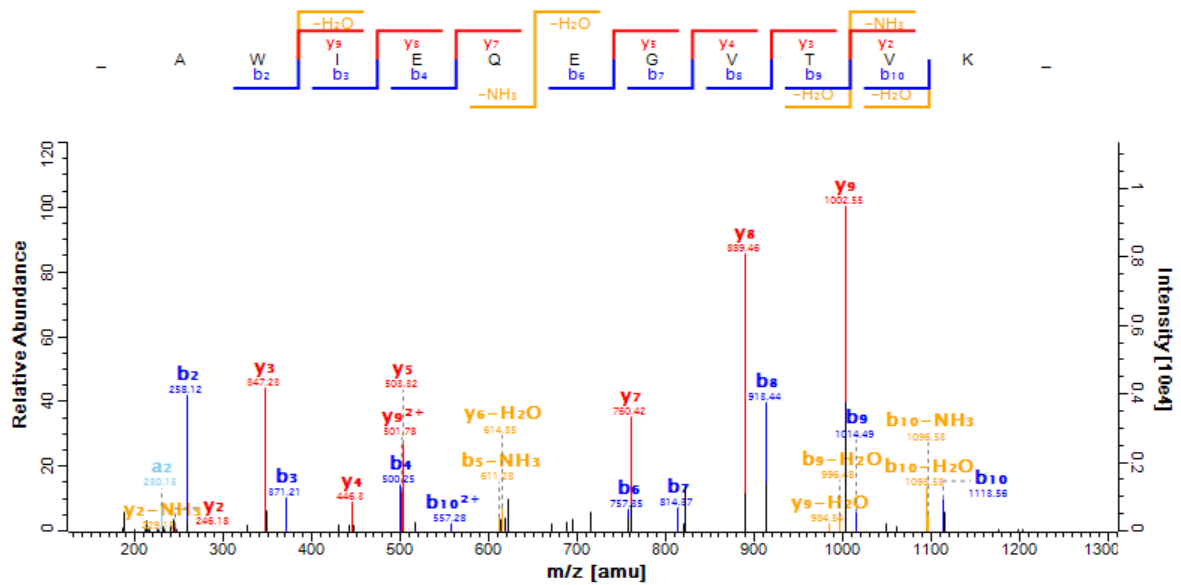

**Protein Group ID:** 2567

**Protein Accession Numbers:** Q9H497; Q9H497-2; Q9H497-3; Q5W0C6

**Gene Names:** TOR3A

**Peptide Sequence:** AESPWTIFLFLSNLR

**Total Number of Spectra:** 1

**Number of Replicates (out of 10):** 1

**Best Match Score:** 92.039

**Best Match Posterior Error Probability:** 0.00028884

**Best Match Spectrum:**

|                    |           |                  |               |
|--------------------|-----------|------------------|---------------|
| <b>Scan number</b> | 7766      | <b>Raw file</b>  | OGE-WT-Frac10 |
| <b>Method</b>      | ITMS; CID | <b>Genenames</b> | TOR3A         |

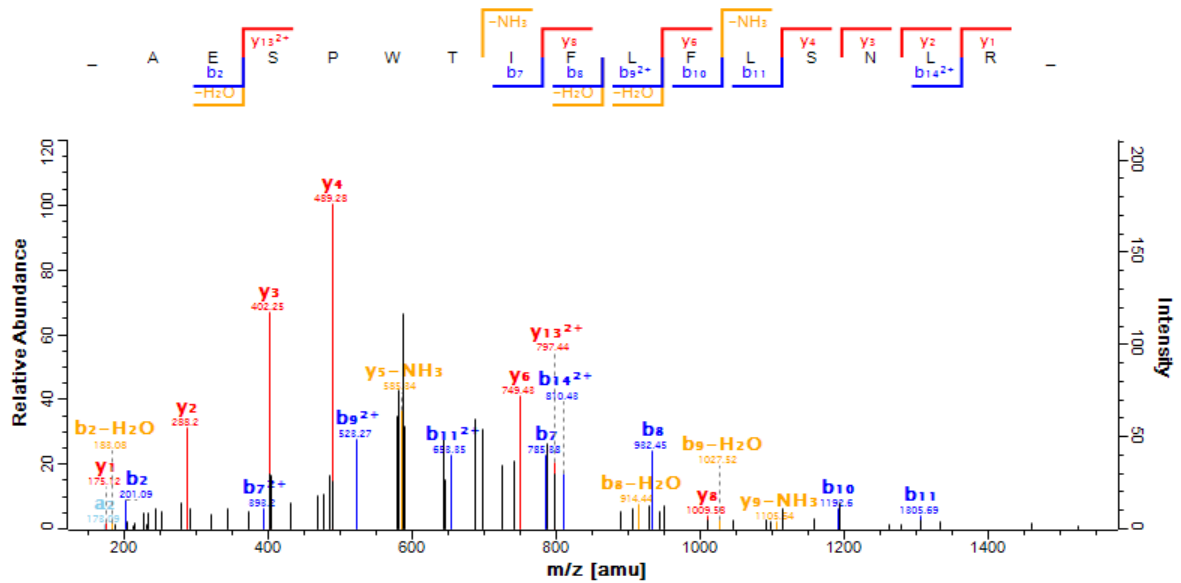

**Protein Group ID:** 2571  
**Protein Accession Numbers:** Q6DD87  
**Gene Names:** ZNF787  
**Peptide Sequence:** LHPELSGPGVAAK  
**Total Number of Spectra:** 1  
**Number of Replicates (out of 10):** 1  
**Best Match Score:** 90.913  
**Best Match Posterior Error Probability:** 0.00089914  
**Best Match Spectrum:**

**Scan number** 1650      **Raw file** 20100917-KD-Batch5-Prt-OGE-Mock-Frac18  
**Method** ITMS; CID      **Genenames** ZNF787

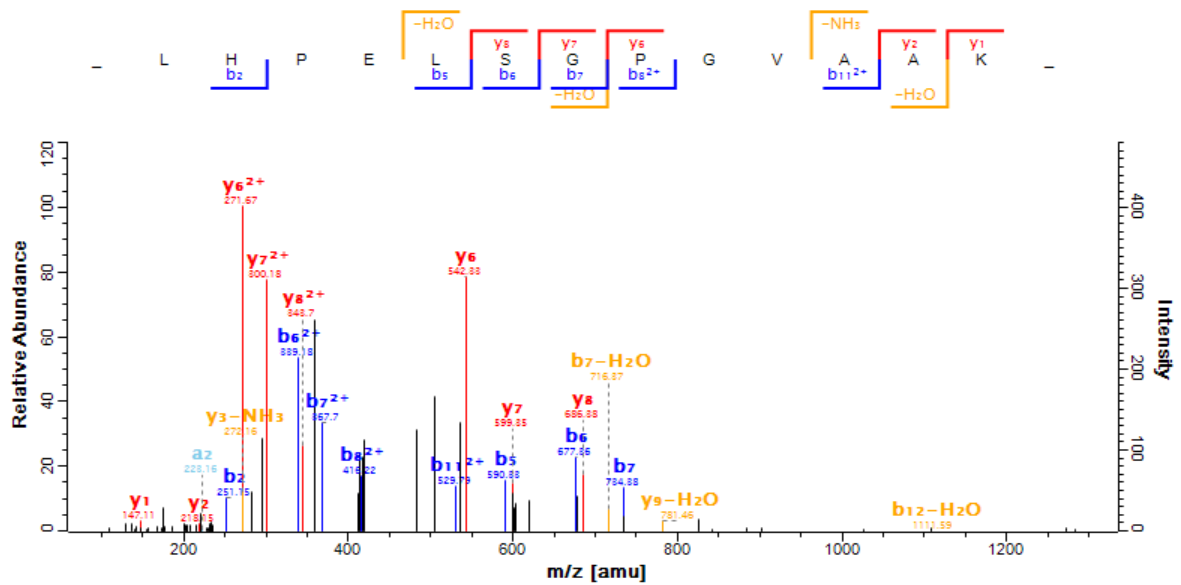

**Protein Group ID:** 2576  
**Protein Accession Numbers:** Q6IB77; Q6IB77-2  
**Gene Names:** GLYAT  
**Peptide Sequence:** MLPLQGAQLQMLEKSLR  
**Total Number of Spectra:** 1  
**Number of Replicates (out of 10):** 1  
**Best Match Score:** 33.796  
**Best Match Posterior Error Probability:** 0.014525  
**Best Match Spectrum:**

**Scan number** 4769      **Raw file** 20100930-KD-Batch5-Prt-OGE-WT-Frac9  
**Method** ITMS; CID      **Genenames** GLYAT

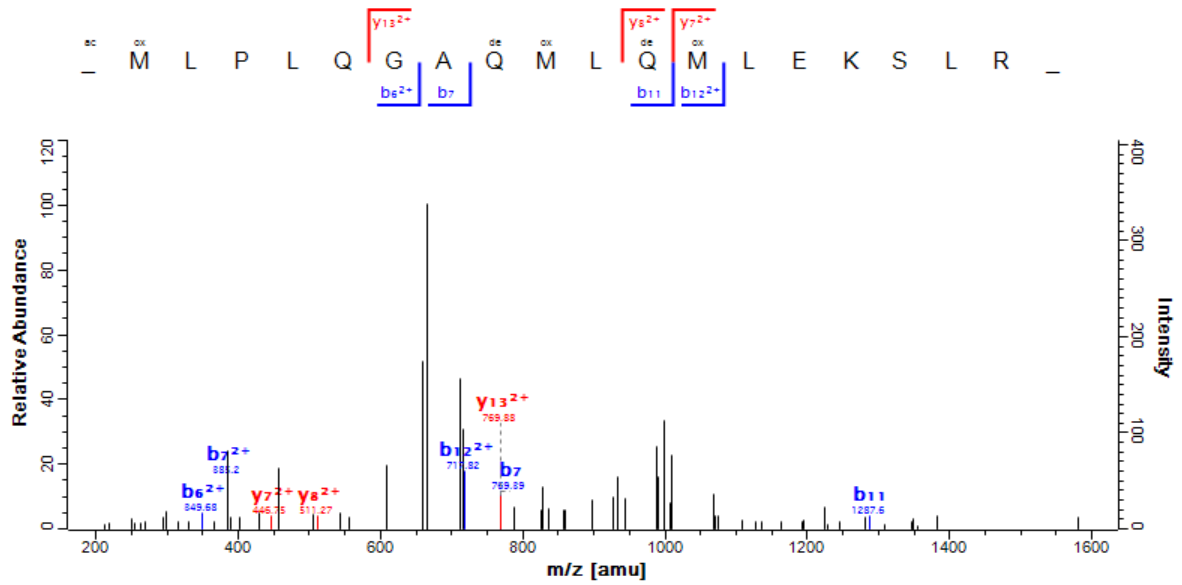

**Protein Group ID:** 2580  
**Protein Accession Numbers:** Q6N063  
**Gene Names:** OGFOD2  
**Peptide Sequence:** DFQQLLAELEQEVER  
**Total Number of Spectra:** 11  
**Number of Replicates (out of 10):** 8  
**Best Match Score:** 149.3  
**Best Match Posterior Error Probability:** 5.39E-08  
**Best Match Spectrum:**

**Scan number** 7288      **Raw file** OGE-WT-Frac9  
**Method** ITMS; CID      **Genenames** OGFOD2

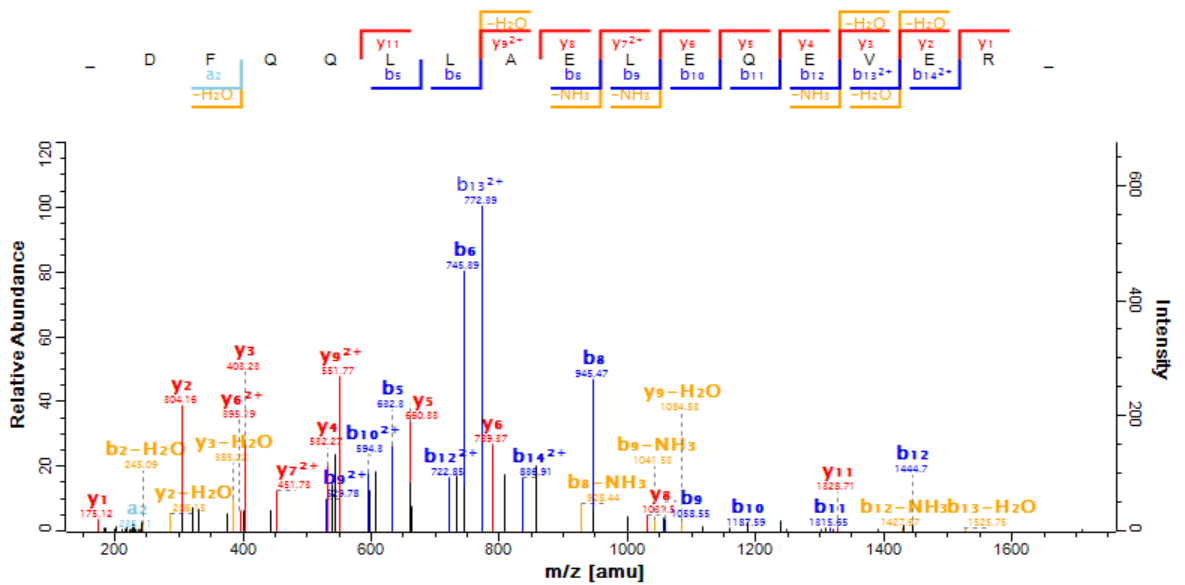

**Protein Group ID:** 2584

**Protein Accession Numbers:** Q6NXT1-2

**Gene Names:**

**Peptide Sequence:** MVLILTSEM<sup>ox</sup>GWGT<sup>-H<sub>2</sub>O</sup>R

**Total Number of Spectra:** 3

**Number of Replicates (out of 10):** 2

**Best Match Score:** 80.69

**Best Match Posterior Error Probability:** 0.0080769

**Best Match Spectrum:**

**Scan number** 6404      **Raw file** 20100927-KD-Batch4-Prt-OGE-WT-Frac14  
**Method** ITMS; CID      **Pepti...** 80.69

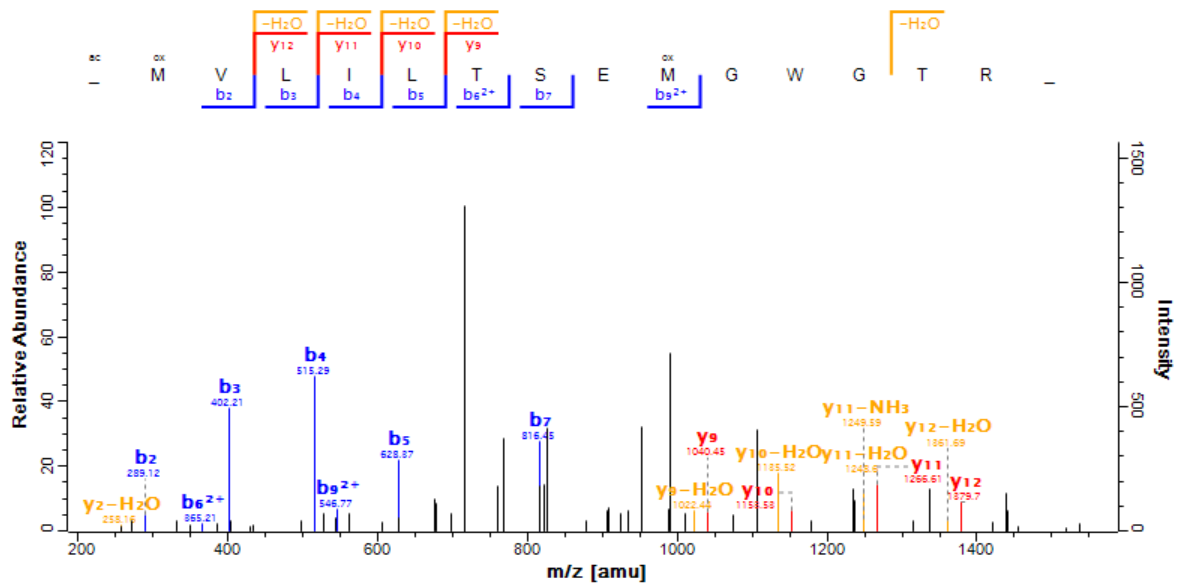

**Protein Group ID:** 2589

**Protein Accession Numbers:** Q6P1K2-5; Q6P1K2-2; Q6P1K2; Q6P1K2-6; Q6P1K2-3

**Gene Names:** PMF1

**Peptide Sequence:** LLDTMVDTFLLQK

**Total Number of Spectra:** 1

**Number of Replicates (out of 10):** 1

**Best Match Score:** 110.8

**Best Match Posterior Error Probability:** 0.00018963

**Best Match Spectrum:**

**Scan number** 6173      **Raw file** Prt-OGE-Batch3-Mock-Frac8  
**Method** ITMS; CID      **Genenames** PMF1

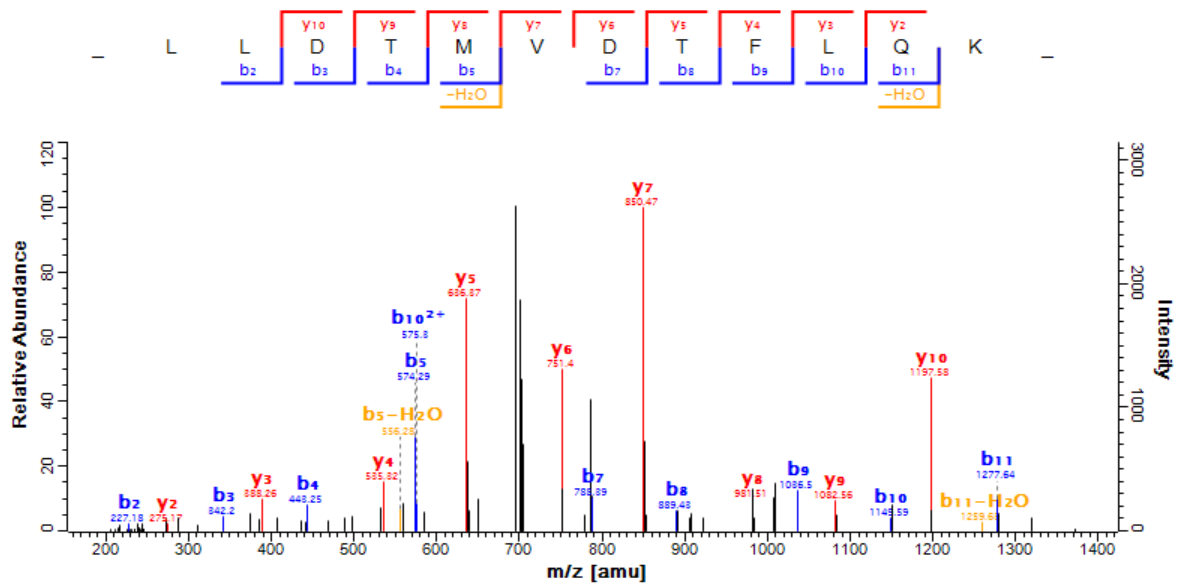



**Protein Group ID:** 2596

**Protein Accession Numbers:** Q6P461-3; Q6P461; Q6P461-2

**Gene Names:** ACSM6

**Peptide Sequence:** MSKAQCIVANEAMAPVVNSAVSDCPY3LTK

**Total Number of Spectra:** 3

**Number of Replicates (out of 10):** 3

**Best Match Score:** 61.437

**Best Match Posterior Error Probability:** 0.00083447

**Best Match Spectrum:**

**Scan number** 3765      **Raw file** Prt-OGE-Batch3-WT-Frac15  
**Method** ITMS; CID      **Genenames** ACSM6

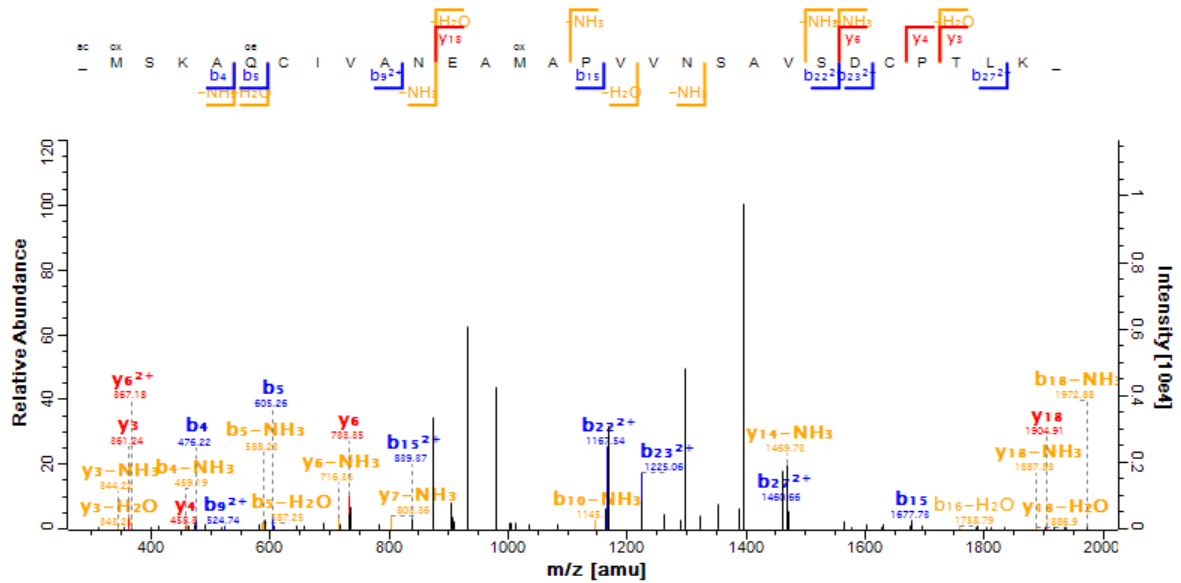

**Protein Group ID:** 2597  
**Protein Accession Numbers:** Q9H0U3; Q6P577  
**Gene Names:** MAGT1  
**Peptide Sequence:** VSQLMWNTNK  
**Total Number of Spectra:** 1  
**Number of Replicates (out of 10):** 1  
**Best Match Score:** 87.184  
**Best Match Posterior Error Probability:** 0.0013714  
**Best Match Spectrum:**

**Scan number** 2407      **Raw file** Prt-OGE-Batch3-WT-Frac1  
**Method** ITMS; CID      **Genenames** MAGT1

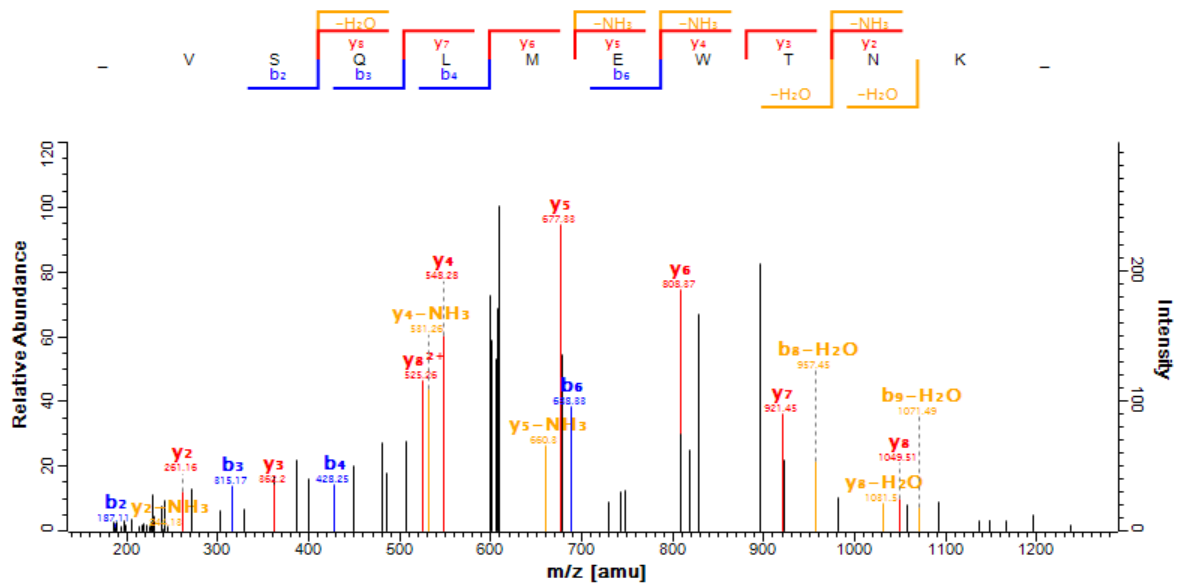



**Protein Group ID:** 2609

**Protein Accession Numbers:** Q6S8J3; P0CG38; Q9BYX7; P0CG39

**Gene Names:** POTEE;POTEI;POTEKP;POTEJ

**Peptide Sequence:** VAPEEHPILLETAPLNPK

**Total Number of Spectra:** 2

**Number of Replicates (out of 10):** 1

**Best Match Score:** 137.61

**Best Match Posterior Error Probability:** 5.43E-06

**Best Match Spectrum:**

**Scan number** 3928      **Raw file** OGE-WT-Frac22  
**Method** ITMS; CID      **Genenames** POTEE;POTEI;POTEKP;POTEJ

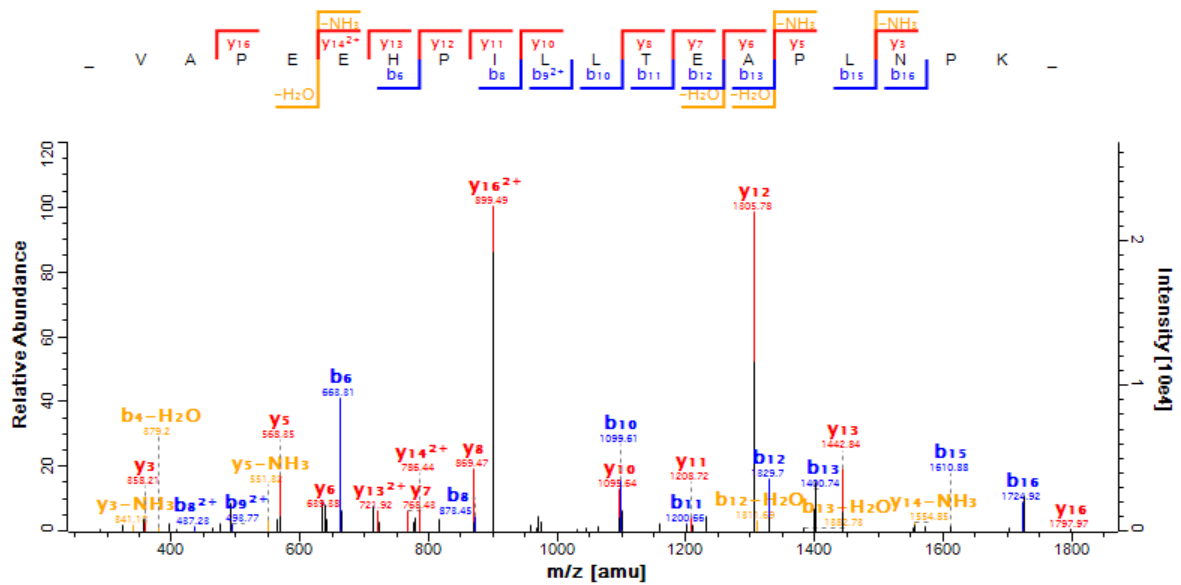

**Protein Group ID:** 2611  
**Protein Accession Numbers:** Q6UW78  
**Gene Names:** C11orf83  
**Peptide Sequence:** TQQLLATLQEAATTQENVAWR  
**Total Number of Spectra:** 3  
**Number of Replicates (out of 10):** 3  
**Best Match Score:** 84.107  
**Best Match Posterior Error Probability:** 0.00012775  
**Best Match Spectrum:**

**Scan number** 6490      **Raw file** 20100914-KD-Batch4-Prt-OGE-Mock-Frac19  
**Method** ITMS; CID      **Genenames** C11orf83

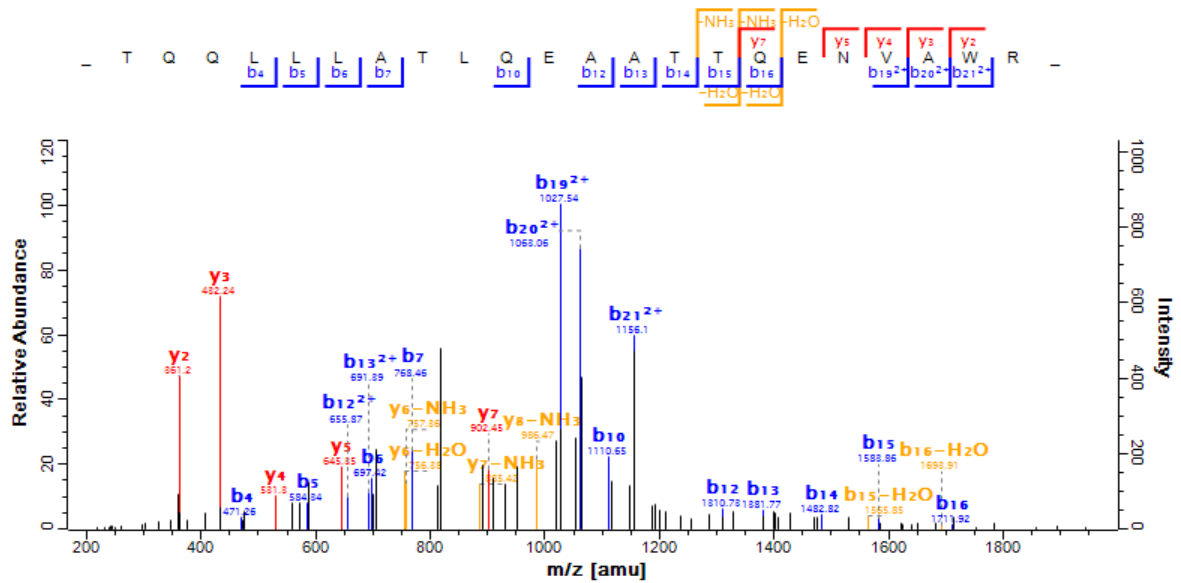

**Protein Group ID:** 2613  
**Protein Accession Numbers:** Q6UXV4  
**Gene Names:** APOOL  
**Peptide Sequence:** SESTSGATQFMPPK  
**Total Number of Spectra:** 1  
**Number of Replicates (out of 10):** 1  
**Best Match Score:** 80.387  
**Best Match Posterior Error Probability:** 0.0009974  
**Best Match Spectrum:**

**Scan number** 1773      **Raw file** Prt-OGE-Batch3-WT-Frac21  
**Method** ITMS; CID      **Genenames** APOOL

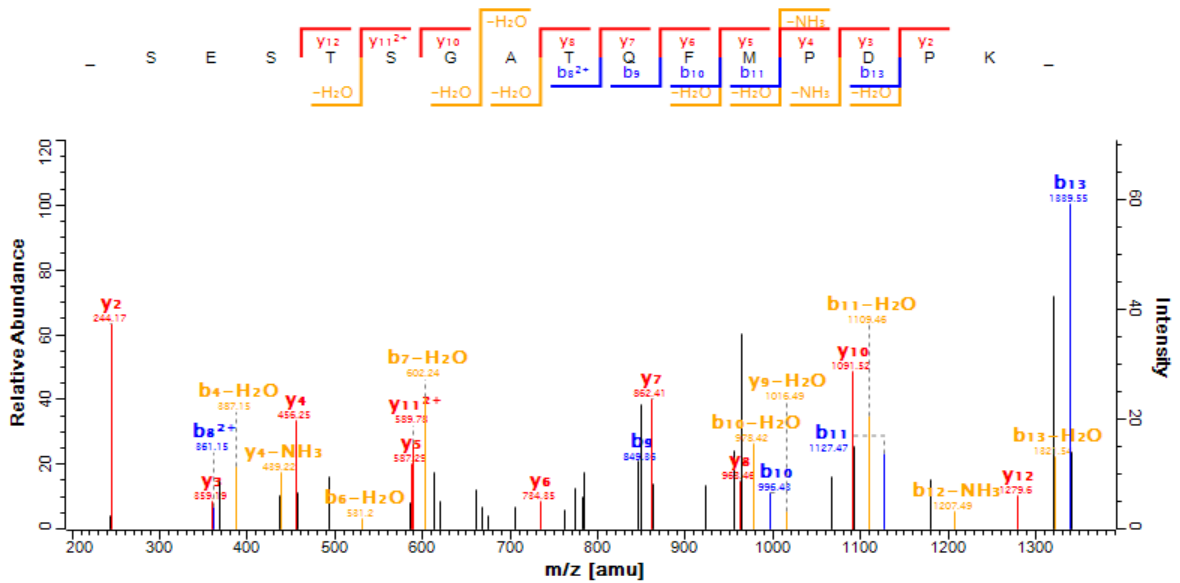

**Protein Group ID:** 2616

**Protein Accession Numbers:** Q6ZSZ5; Q6ZSZ5-2

**Gene Names:** ARHGEF18

**Peptide Sequence:** IQTLSQLLLNLQAVIAHQDSYVETQR

**Total Number of Spectra:** 1

**Number of Replicates (out of 10):** 1

**Best Match Score:** 81.312

**Best Match Posterior Error Probability:** 6.17E-06

**Best Match Spectrum:**

**Scan number** 8552      **Raw file** 20100930-KD-Batch5-Prt-OGE-WT-Frac12  
**Method** ITMS; CID      **Genenames** ARHGEF18

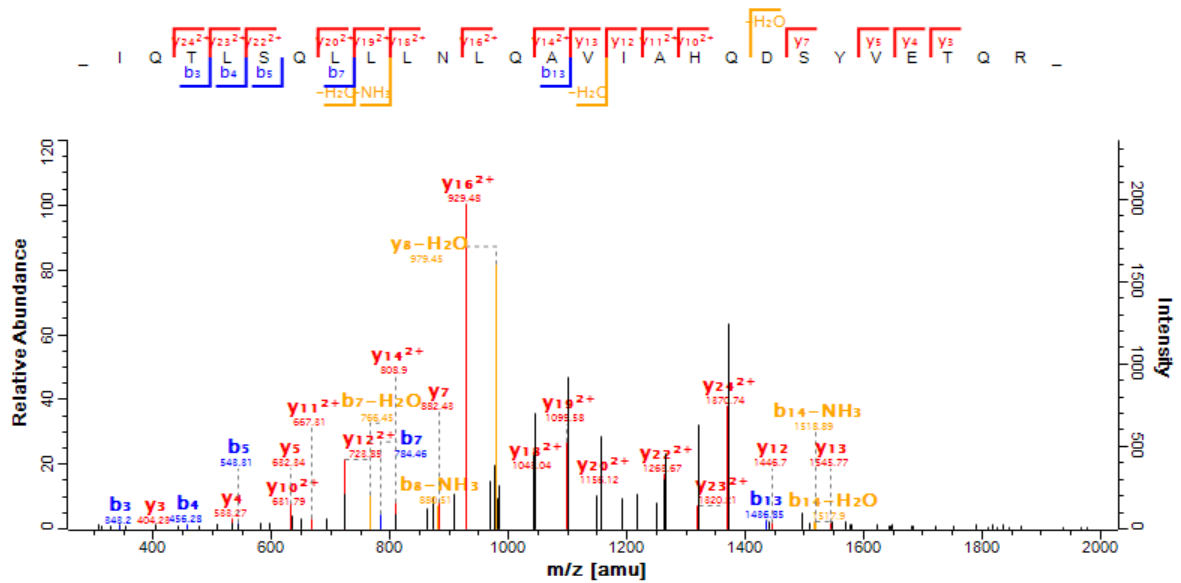

**Protein Group ID:** 2621  
**Protein Accession Numbers:** Q96FN4; Q719H8  
**Gene Names:** CPNE2  
**Peptide Sequence:** AVLAE L P Q V V Q Y F K  
**Total Number of Spectra:** 5  
**Number of Replicates (out of 10):** 5  
**Best Match Score:** 109.83  
**Best Match Posterior Error Probability:** 5.74E-05  
**Best Match Spectrum:**

**Scan number** 5490      **Raw file** Prt-OGE-Batch2-WT-Frac12  
**Method** ITMS; CID      **Genenames** CPNE2

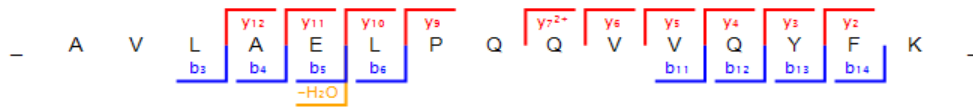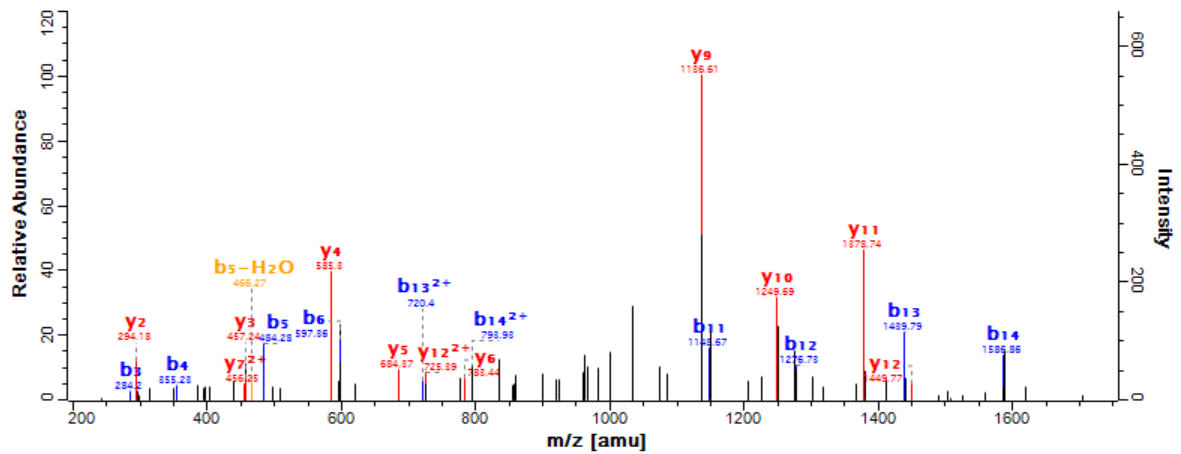



**Protein Group ID:** 2622

**Protein Accession Numbers:** Q71DI3

**Gene Names:** HIST2H3A

**Peptide Sequence:** FQSSAVMLQEASEAYLVGLFEDTNLC A I H A K

**Total Number of Spectra:** 22

**Number of Replicates (out of 10):** 3

**Best Match Score:** 124.39

**Best Match Posterior Error Probability:** 1.92E-33

**Best Match Spectrum:**

**Scan number** 8772      **Raw file** 20100930-KD-Batch5-Prt-OGE-WT-Frac13  
**Method** ITMS; CID      **Genenames** HIST2H3A

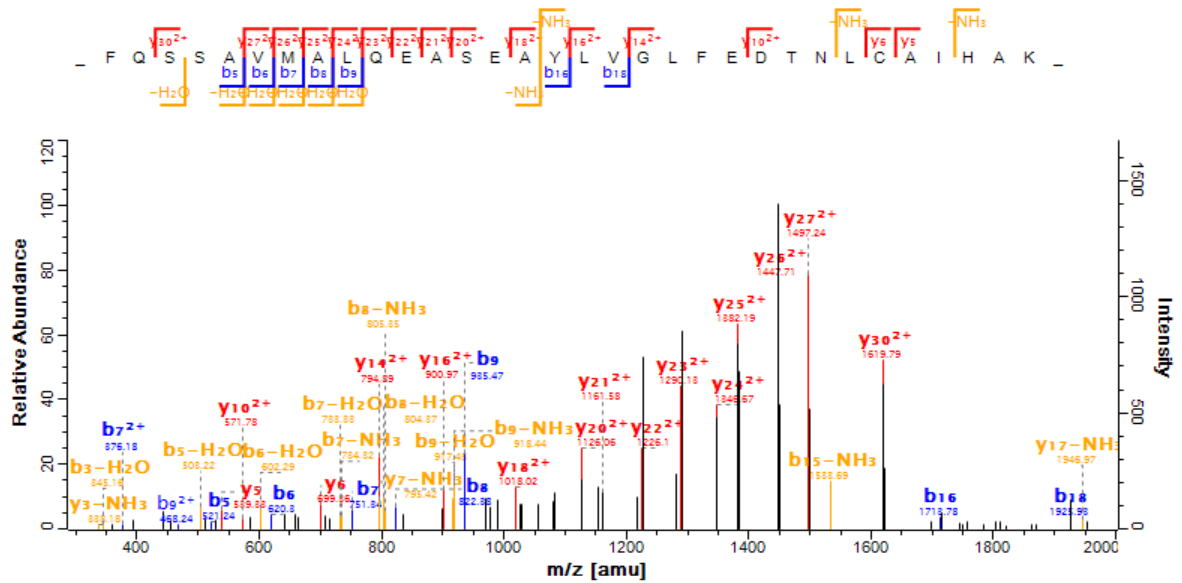

**Protein Group ID:** 2623

**Protein Accession Numbers:** Q71U36; G3V1U9; Q13748; F8VXZ4; Q6PEY2; Q13748-2; F8VQQ4

**Gene Names:** TUBA1A;TUBA3C;TUBA3E

**Peptide Sequence:** LIGQIVSSITASLR

**Total Number of Spectra:** 53

**Number of Replicates (out of 10):** 10

**Best Match Score:** 213.99

**Best Match Posterior Error Probability:** 1.91E-37

**Best Match Spectrum:**

|                    |           |                  |                      |
|--------------------|-----------|------------------|----------------------|
| <b>Scan number</b> | 6073      | <b>Raw file</b>  | OGE-WT-Frac11        |
| <b>Method</b>      | ITMS: CID | <b>Genenames</b> | TUBA1A;TUBA3C;TUBA3E |

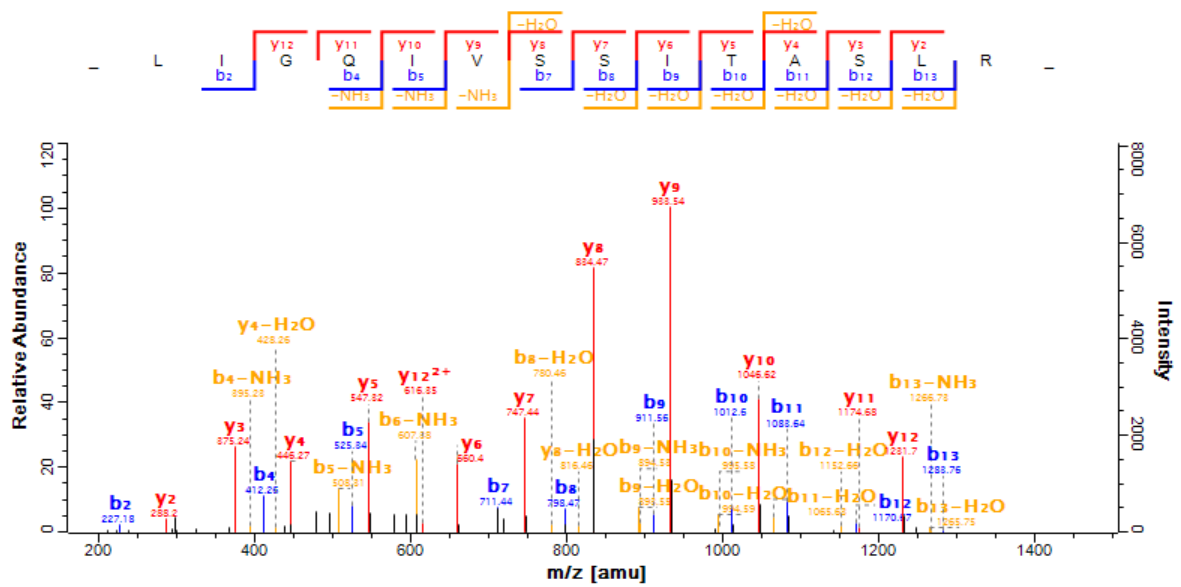

**Protein Group ID:** 2631  
**Protein Accession Numbers:** Q7LBR1  
**Gene Names:** CHMP1B  
**Peptide Sequence:** NQAVNFLR  
**Total Number of Spectra:** 9  
**Number of Replicates (out of 10):** 9  
**Best Match Score:** 114.93  
**Best Match Posterior Error Probability:** 0.0015884  
**Best Match Spectrum:**

|                    |           |                  |                          |
|--------------------|-----------|------------------|--------------------------|
| <b>Scan number</b> | 1836      | <b>Raw file</b>  | Prt-OGE-Batch3-WT-Frac17 |
| <b>Method</b>      | ITMS; CID | <b>Genenames</b> | CHMP1B                   |

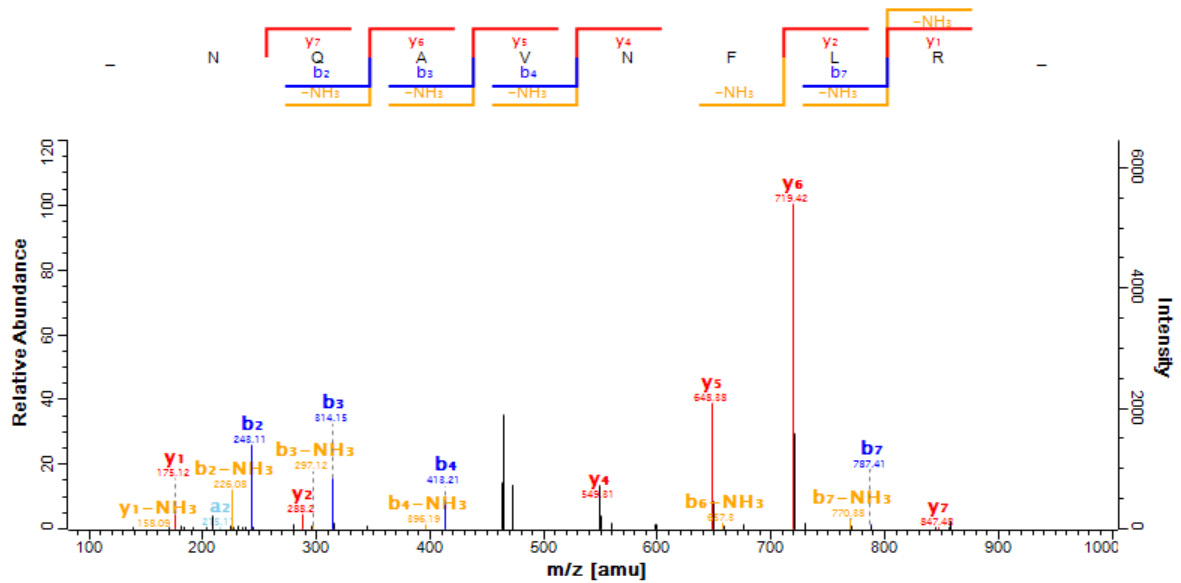

**Protein Group ID:** 2636

**Protein Accession Numbers:** Q7Z309-3; Q7Z309-2; Q7Z309; Q7Z309-4

**Gene Names:** FAM122B

**Peptide Sequence:** MELDLEPDTSYGGTLR

**Total Number of Spectra:** 2

**Number of Replicates (out of 10):** 2

**Best Match Score:** 100.43

**Best Match Posterior Error Probability:** 0.00019885

**Best Match Spectrum:**

**Scan number** 4377      **Raw file** Prt-OGE-Batch3-Mock-Frac4  
**Method** ITMS; CID      **Genenames** FAM122B

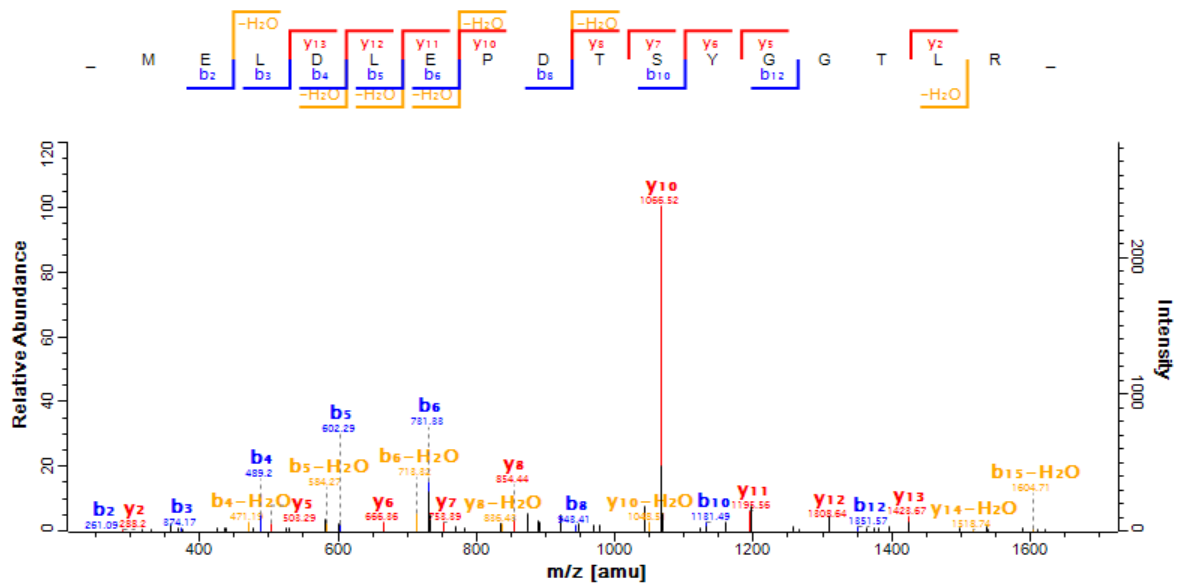

**Protein Group ID:** 2643  
**Protein Accession Numbers:** Q7Z6K4  
**Gene Names:** NRARP  
**Peptide Sequence:** SQAELSTCSAPQTQRIFQEAVR  
**Total Number of Spectra:** 1  
**Number of Replicates (out of 10):** 1  
**Best Match Score:** 91.414  
**Best Match Posterior Error Probability:** 0.0071265  
**Best Match Spectrum:**

**Scan number** 5122      **Raw file** 20100930-KD-Batch5-Prt-OGE-WT-Frac3  
**Method** ITMS; CID      **Genenames** NRARP

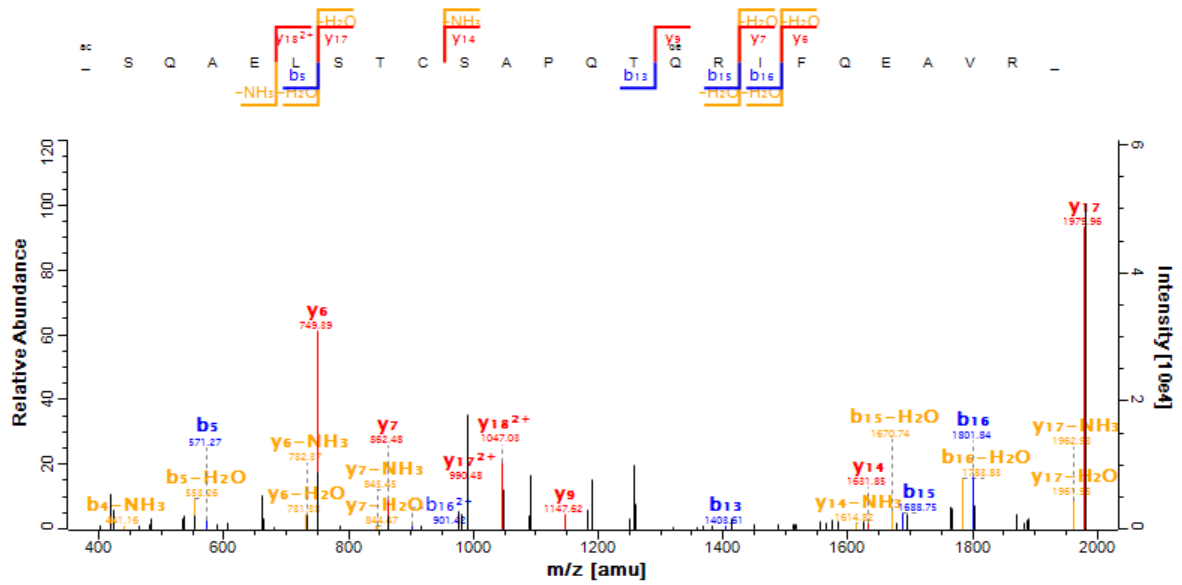

**Protein Group ID:** 2645  
**Protein Accession Numbers:** Q7Z7A3  
**Gene Names:** CTU1  
**Peptide Sequence:** PSAVLDLVHSAER  
**Total Number of Spectra:** 5  
**Number of Replicates (out of 10):** 3  
**Best Match Score:** 133.05  
**Best Match Posterior Error Probability:** 3.80E-05  
**Best Match Spectrum:**

**Scan number** 3009      **Raw file** 20100914-KD-Batch4-Prt-OGE-Mock-Frac23  
**Method** ITMS; CID      **Genenames** CTU1

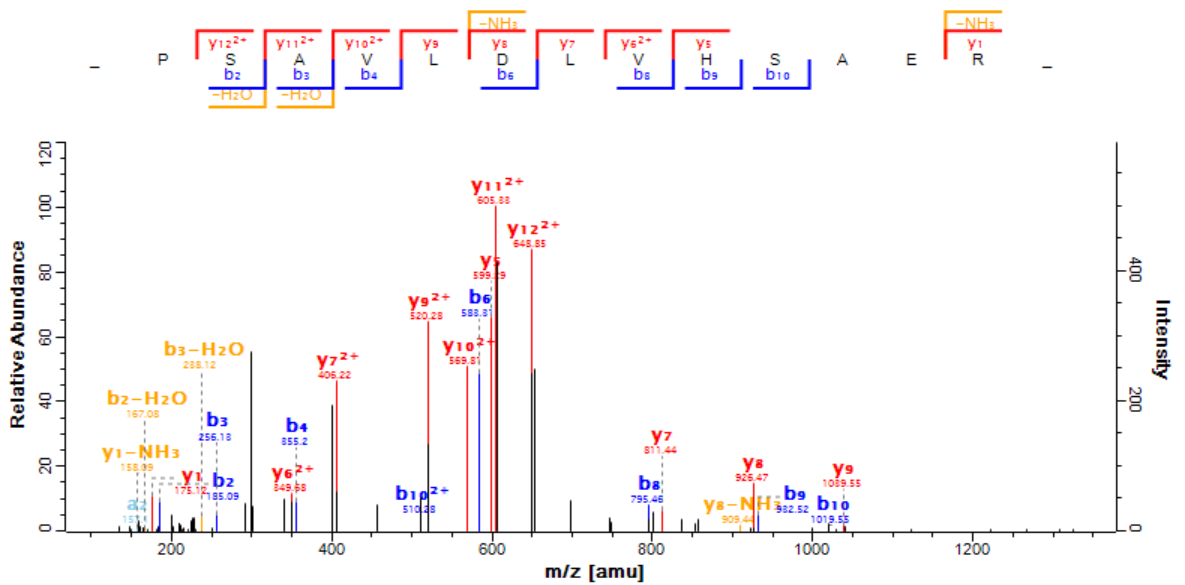

**Protein Group ID:** 2646  
**Protein Accession Numbers:** Q7Z7B0; Q7Z7B0-2  
**Gene Names:** FILIP1  
**Peptide Sequence:** SLESKEDLIQLLSIMEGELQAR  
**Total Number of Spectra:** 4  
**Number of Replicates (out of 10):** 3  
**Best Match Score:** 92.492  
**Best Match Posterior Error Probability:** 2.76E-05  
**Best Match Spectrum:**

**Scan number** 8539      **Raw file** Prt-OGE-Batch2-Mock-Frac1 8  
**Method** ITMS; CID      **Genenames** FILIP1

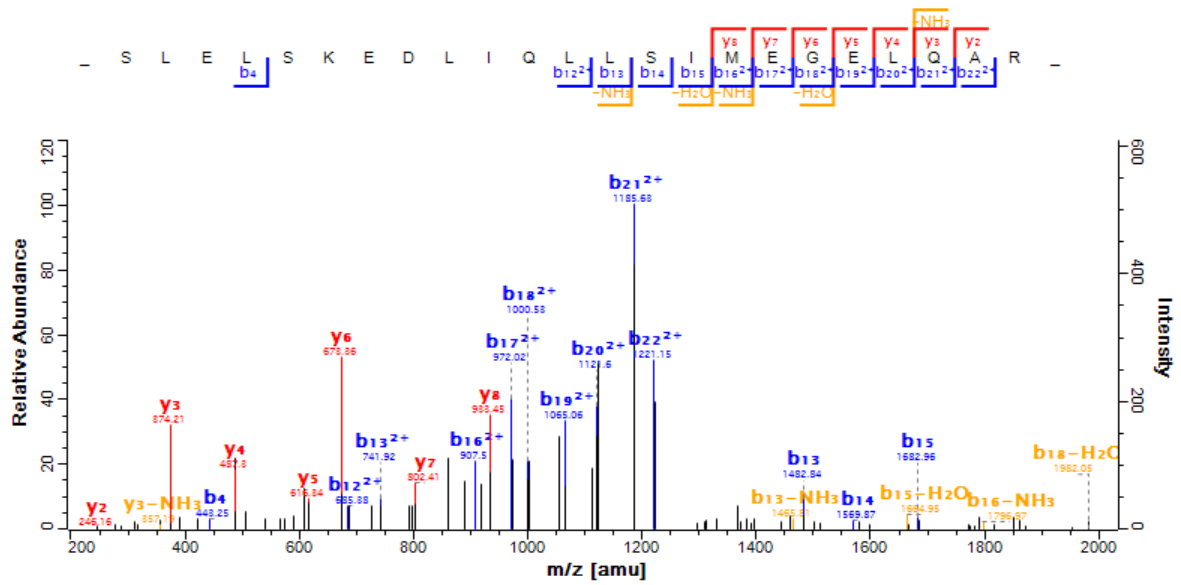

**Protein Group ID:** 2648

**Protein Accession Numbers:** Q7Z7G8; Q7Z7G8-6; Q7Z7G8-2

**Gene Names:** VPS13B

**Peptide Sequence:** SILCDINEFSLK

**Total Number of Spectra:** 5

**Number of Replicates (out of 10):** 3

**Best Match Score:** 84.365

**Best Match Posterior Error Probability:** 0.0010909

**Best Match Spectrum:**

|                    |           |                  |                                        |
|--------------------|-----------|------------------|----------------------------------------|
| <b>Scan number</b> | 5036      | <b>Raw file</b>  | 20100917-KD-Batch5-Prt-OGE-Mock-Frac19 |
| <b>Method</b>      | ITMS; CID | <b>Genenames</b> | VPS13B                                 |

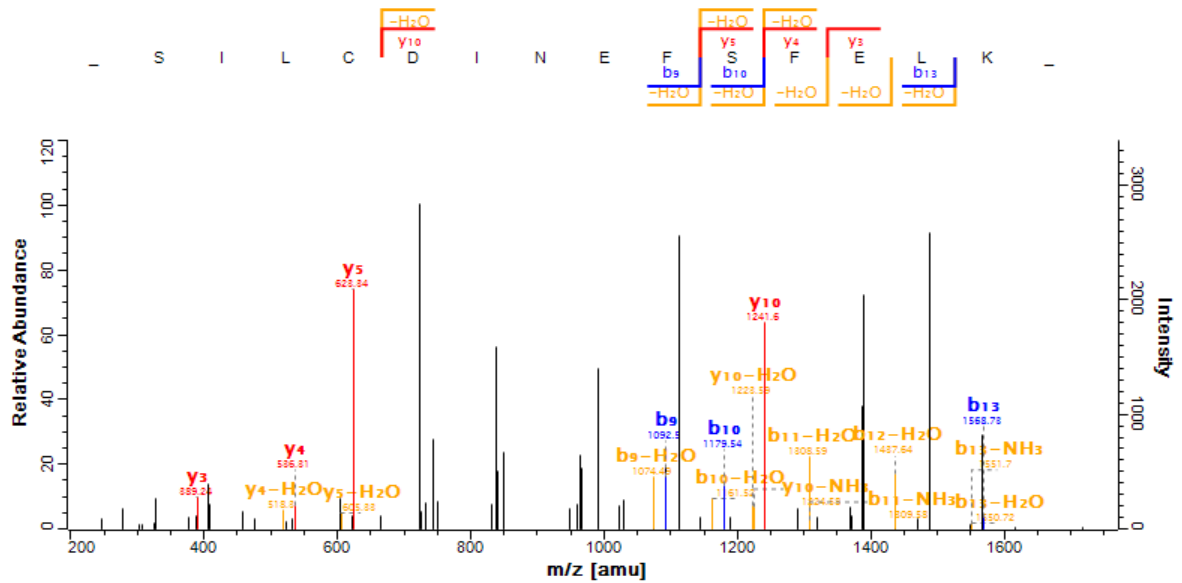



**Protein Group ID:** 2652

**Protein Accession Numbers:** Q86SQ4-3; Q86SQ4-4; Q86SQ4; Q86SQ4-2

**Gene Names:** GPR126

**Peptide Sequence:** TGLFQDVGPQR

**Total Number of Spectra:** 3

**Number of Replicates (out of 10):** 2

**Best Match Score:** 120.77

**Best Match Posterior Error Probability:** 9.38E-05

**Best Match Spectrum:**

|                    |           |                  |                                     |
|--------------------|-----------|------------------|-------------------------------------|
| <b>Scan number</b> | 2815      | <b>Raw file</b>  | 20100930-KD-Batch5-Prt-OGE-WT-Frac2 |
| <b>Method</b>      | ITMS; CID | <b>Genenames</b> | GPR126                              |

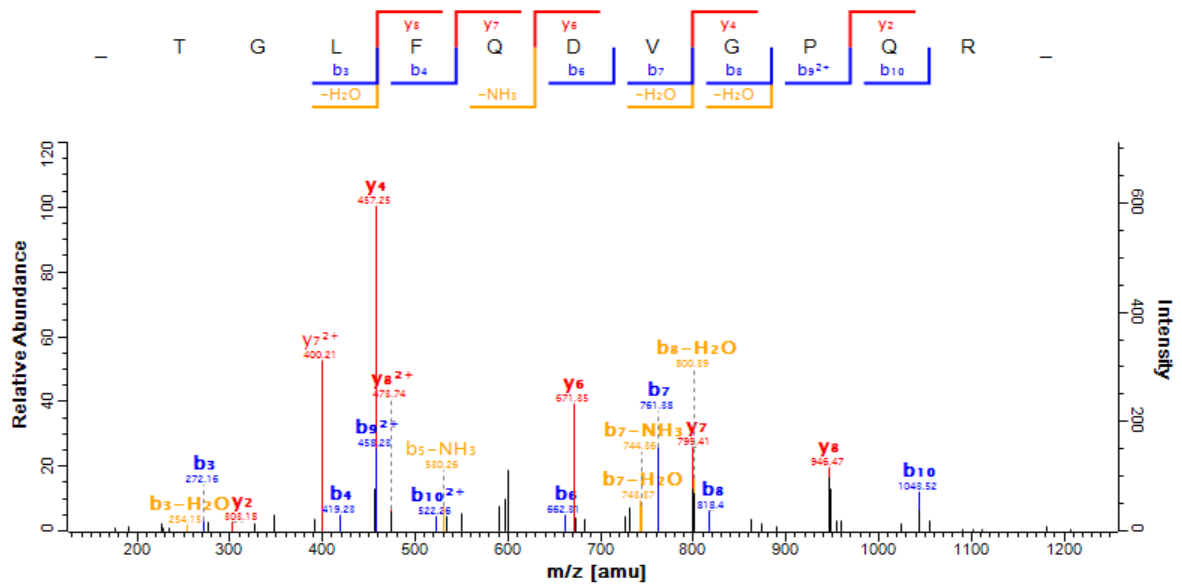

**Protein Group ID:** 2654  
**Protein Accession Numbers:** Q86TB9; Q86TB9-4  
**Gene Names:** PATL1  
**Peptide Sequence:** MVIENELEDPAIMR  
**Total Number of Spectra:** 1  
**Number of Replicates (out of 10):** 1  
**Best Match Score:** 86.772  
**Best Match Posterior Error Probability:** 0.016099  
**Best Match Spectrum:**

**Scan number** 4545      **Raw file** OGE-WT-Frac14  
**Method** ITMS; CID      **Genenames** PATL1

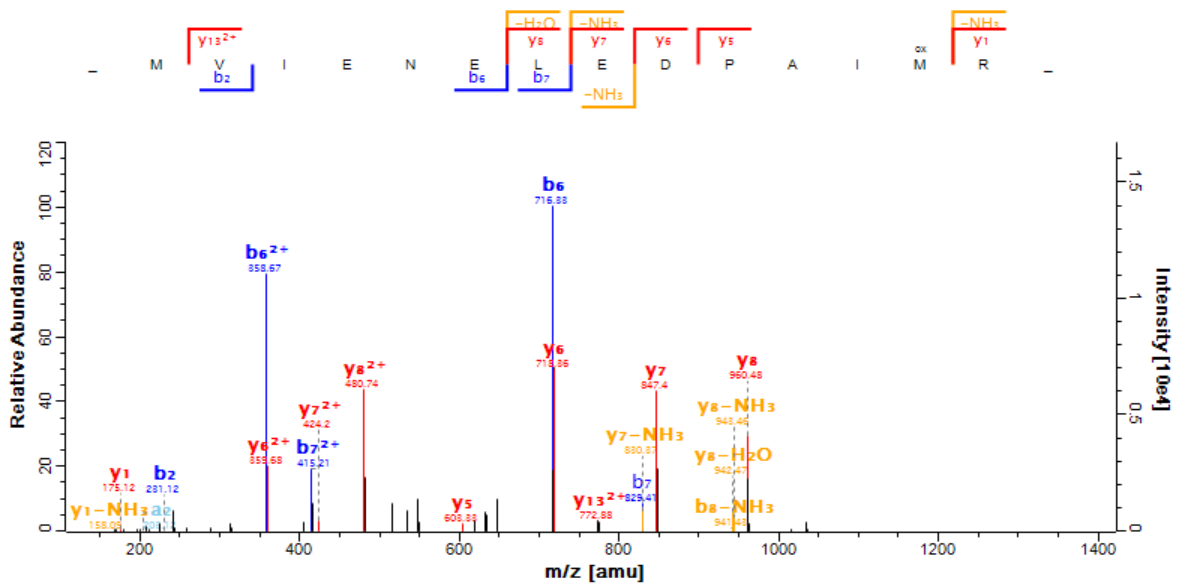

**Protein Group ID:** 2655

**Protein Accession Numbers:** Q86TI2-2; Q86TI2; Q86TI2-4

**Gene Names:** DPP9

**Peptide Sequence:** LAEFQTDSQGK

**Total Number of Spectra:** 3

**Number of Replicates (out of 10):** 3

**Best Match Score:** 90.793

**Best Match Posterior Error Probability:** 0.00082927

**Best Match Spectrum:**

**Scan number** 1687      **Raw file** OGE-WT-Frac15  
**Method** ITMS; CID      **Genenames** DPP9

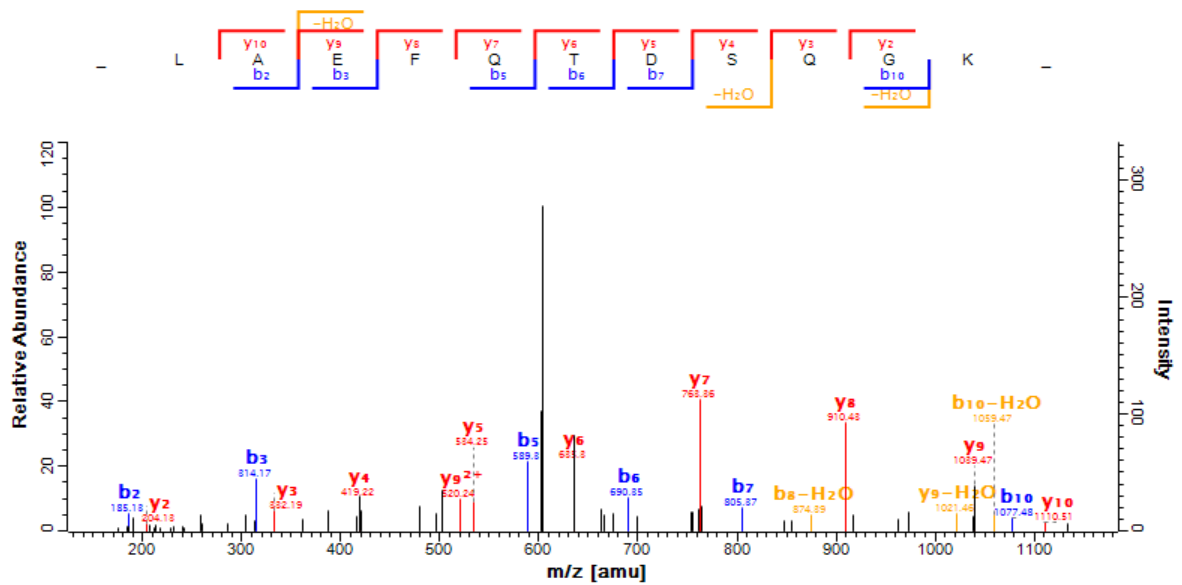



**Protein Group ID:** 2664

**Protein Accession Numbers:** Q86V88; Q86V88-2; Q86V88-3

**Gene Names:** MDP1

**Peptide Sequence:** LAVFDLDYTLWPFVVDTHVDPFPFHK

**Total Number of Spectra:** 3

**Number of Replicates (out of 10):** 3

**Best Match Score:** 76.027

**Best Match Posterior Error Probability:** 1.95E-05

**Best Match Spectrum:**

**Scan number** 8231      **Raw file** 20100930-KD-Batch5-Prt-OGE-WT-Frac13  
**Method** ITMS; CID      **Genenames** MDP1

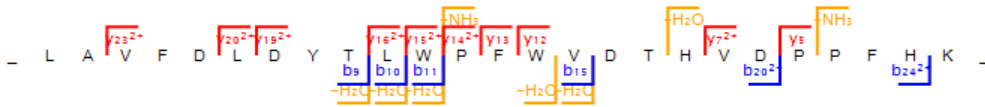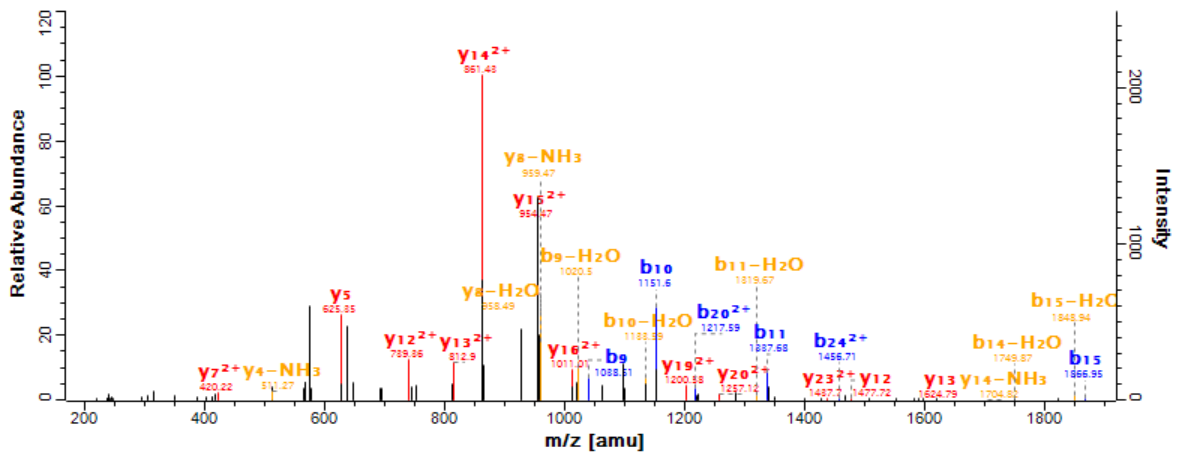

**Protein Group ID:** 2667

**Protein Accession Numbers:** Q9UPY6; Q86VQ2; Q9Y6W5; Q9Y6W5-2

**Gene Names:** WASF3;WASF2

**Peptide Sequence:** FYTDPSYFFDLWK

**Total Number of Spectra:** 2

**Number of Replicates (out of 10):** 2

**Best Match Score:** 147.33

**Best Match Posterior Error Probability:** 1.23E-05

**Best Match Spectrum:**

|                    |           |                  |                                      |
|--------------------|-----------|------------------|--------------------------------------|
| <b>Scan number</b> | 7373      | <b>Raw file</b>  | 20100930-KD-Batch5-Prt-OGE-WT-Frac13 |
| <b>Method</b>      | ITMS; CID | <b>Genenames</b> | WASF3;WASF2                          |

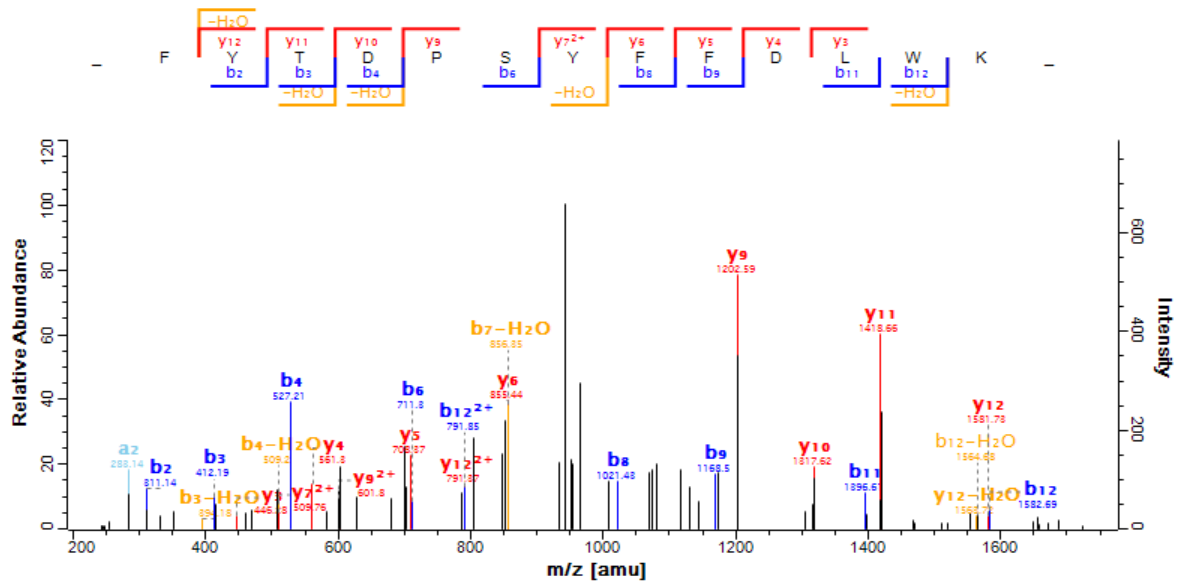

**Protein Group ID:** 2681  
**Protein Accession Numbers:** Q8IUC1  
**Gene Names:** KRTAP11-1  
**Peptide Sequence:** QTTCISNPCSTTYSR  
**Total Number of Spectra:** 1  
**Number of Replicates (out of 10):** 1  
**Best Match Score:** 93.237  
**Best Match Posterior Error Probability:** 0.00025643  
**Best Match Spectrum:**

**Scan number** 1408      **Raw file** 20100930-KD-Batch5-Prt-OGE-WT-Frac2  
**Method** ITMS; CID      **Genenames** KRTAP11-1

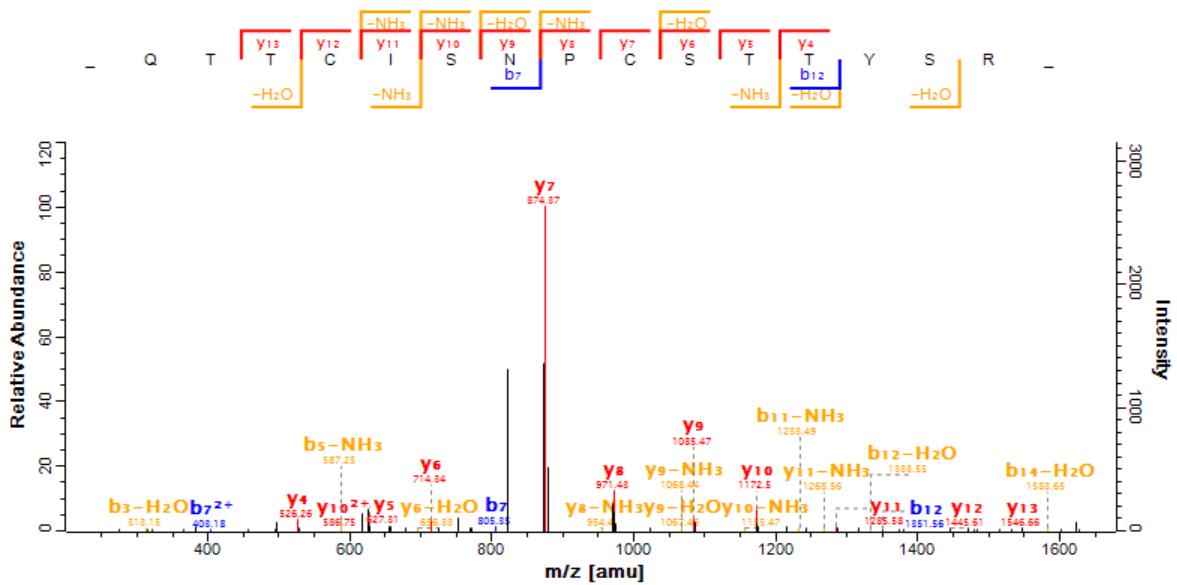

**Protein Group ID:** 2687

**Protein Accession Numbers:** Q8IVB5

**Gene Names:** LIX1L

**Peptide Sequence:** VNVVEALQEFWQMK

**Total Number of Spectra:** 2

**Number of Replicates (out of 10):** 2

**Best Match Score:** 101.43

**Best Match Posterior Error Probability:** 0.00031543

**Best Match Spectrum:**

|                    |           |                  |                                        |
|--------------------|-----------|------------------|----------------------------------------|
| <b>Scan number</b> | 7345      | <b>Raw file</b>  | 20100917-KD-Batch5-Prt-OGE-Mock-Frac20 |
| <b>Method</b>      | ITMS; CID | <b>Genenames</b> | LIX1L                                  |

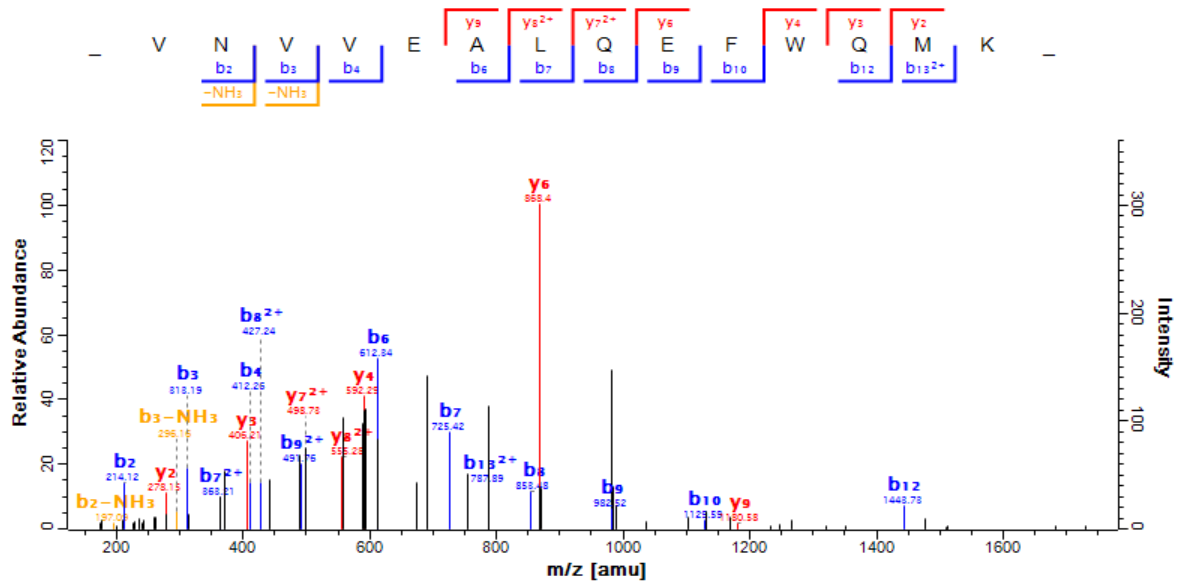



**Protein Group ID:** 2691  
**Protein Accession Numbers:** Q8IVS2  
**Gene Names:** MCAT  
**Peptide Sequence:** SYSAVDVLQTLQLEHVDLDPQEP  
**Total Number of Spectra:** 1  
**Number of Replicates (out of 10):** 1  
**Best Match Score:** 74.776  
**Best Match Posterior Error Probability:** 0.00029886  
**Best Match Spectrum:**

**Scan number** 5570      **Raw file** Prt-OGE-Batch2-WT-Frac18  
**Method** ITMS; CID      **Genenames** MCAT

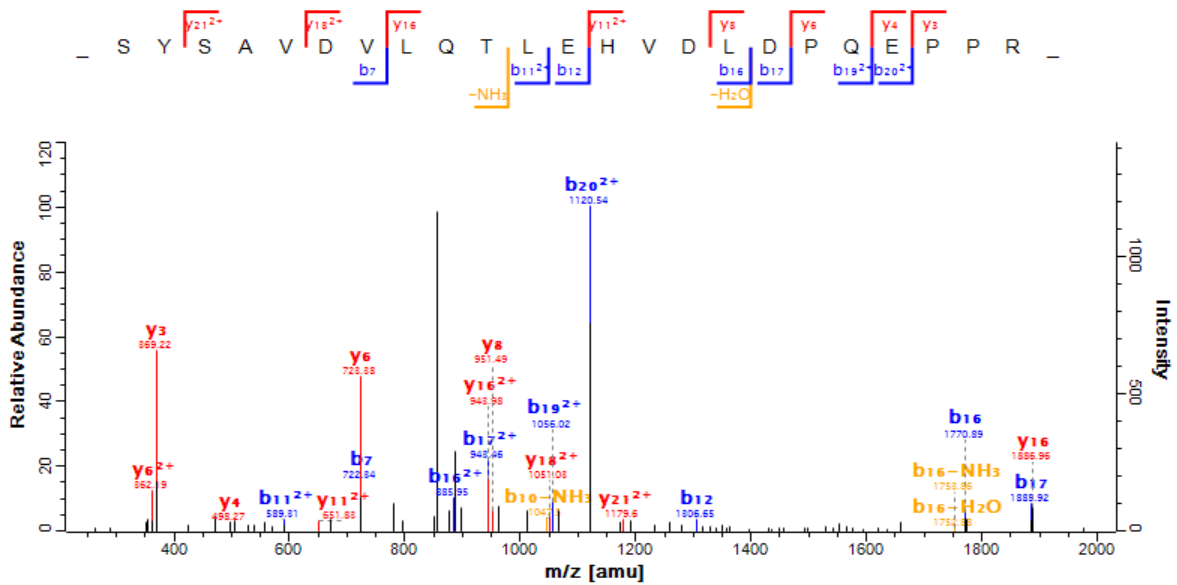

**Protein Group ID:** 2692  
**Protein Accession Numbers:** Q9NXJ5; Q8IVT1  
**Gene Names:** PGPEP1  
**Peptide Sequence:** AIIEMLDLLEQSEGK  
**Total Number of Spectra:** 2  
**Number of Replicates (out of 10):** 2  
**Best Match Score:** 117.08  
**Best Match Posterior Error Probability:** 0.00012222  
**Best Match Spectrum:**

**Scan number** 8175      **Raw file** 20100927-KD-Batch4-Prt-OGE-WT-Frac10  
**Method** ITMS; CID      **Genenames** PGPEP1

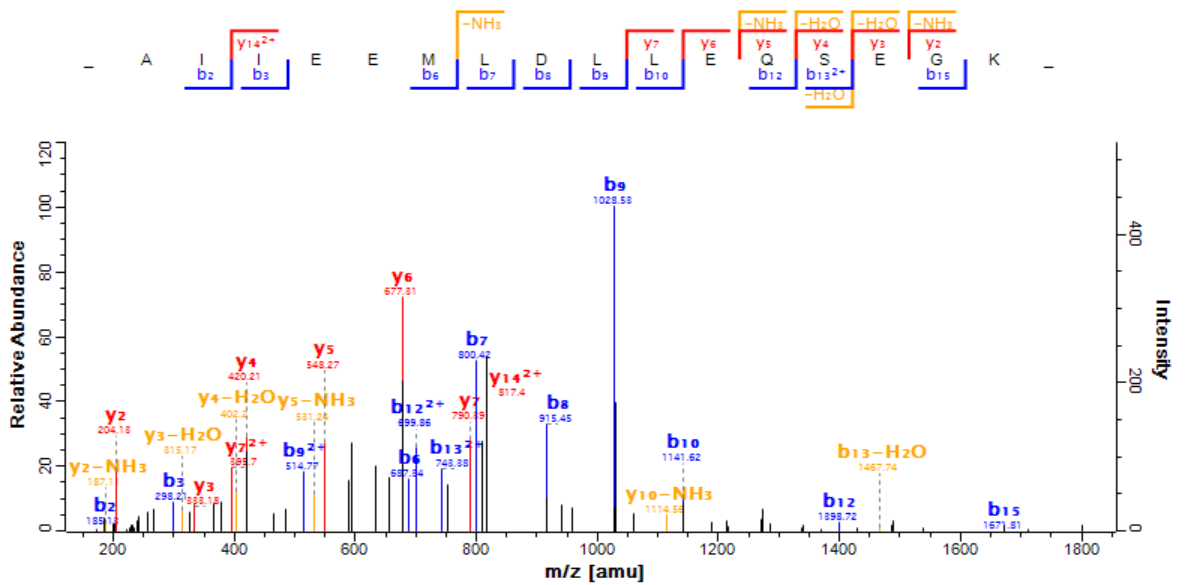

**Protein Group ID:** 2694

**Protein Accession Numbers:** Q8IVU3; Q8IVU3-2; Q8IVU3-3

**Gene Names:** HERC6

**Peptide Sequence:** GELPEPIQALETLVSDLVSYCGK

**Total Number of Spectra:** 1

**Number of Replicates (out of 10):** 1

**Best Match Score:** 101.17

**Best Match Posterior Error Probability:** 5.40E-06

**Best Match Spectrum:**

|                    |           |                  |                                      |
|--------------------|-----------|------------------|--------------------------------------|
| <b>Scan number</b> | 9945      | <b>Raw file</b>  | 20100930-KD-Batch5-Prt-OGE-WT-Frac19 |
| <b>Method</b>      | ITMS; CID | <b>Genenames</b> | HERC6                                |

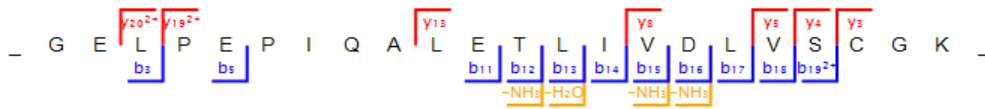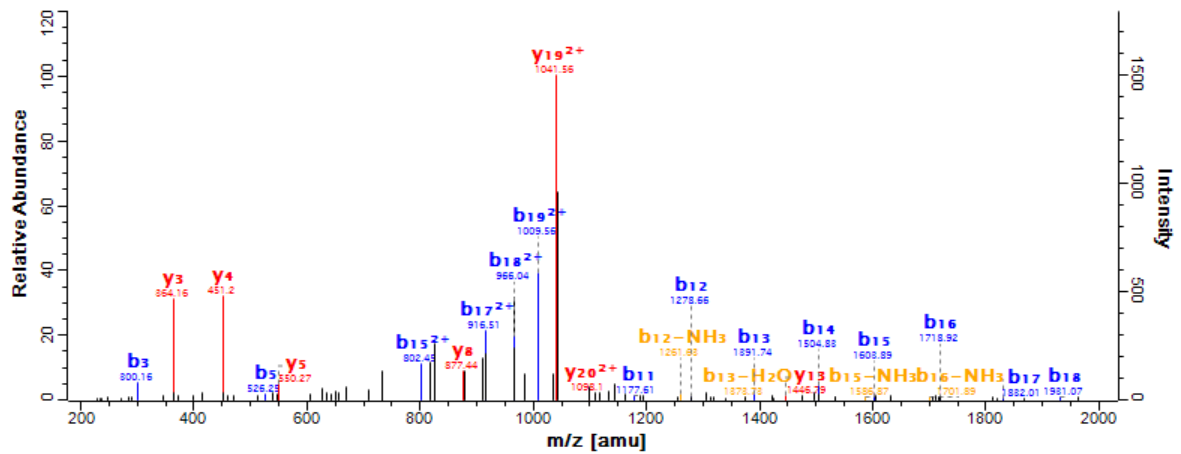

**Protein Group ID:** 2700

**Protein Accession Numbers:** Q8IXQ3

**Gene Names:** C9orf40

**Peptide Sequence:** EDHGLETGDPPPLPPPPVLPGPGEELPGAR

**Total Number of Spectra:** 4

**Number of Replicates (out of 10):** 4

**Best Match Score:** 115.88

**Best Match Posterior Error Probability:** 2.44E-18

**Best Match Spectrum:**

**Scan number** 3882      **Raw file** Prt-OGE-Batch3-WT-Frac2  
**Method** ITMS; CID      **Genenames** C9orf40

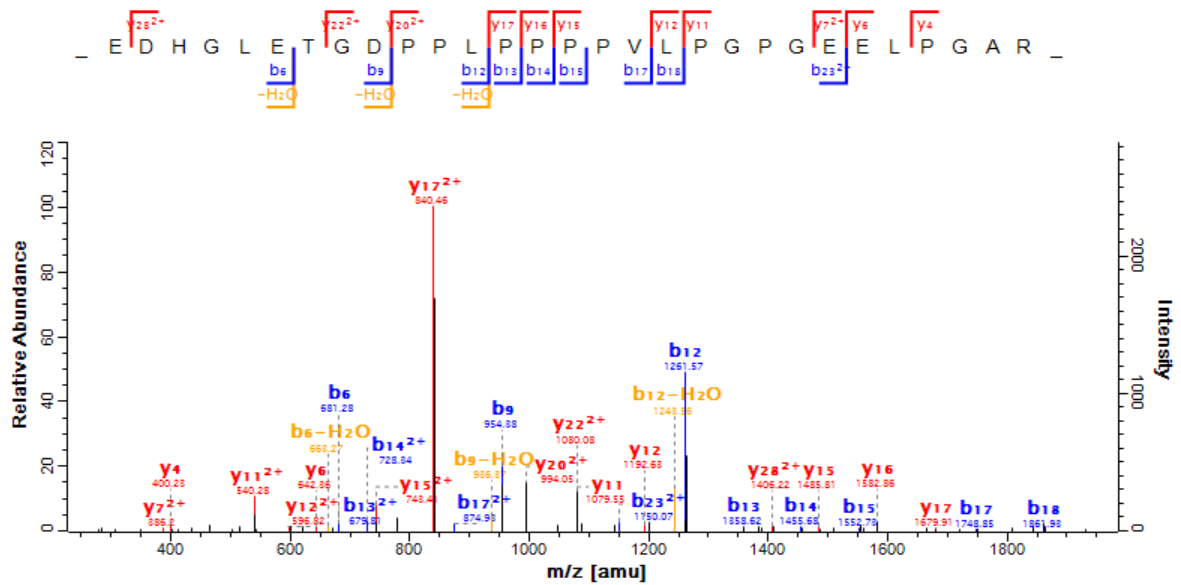

**Protein Group ID:** 2712

**Protein Accession Numbers:** Q8N1A6

**Gene Names:** C4orf33

**Peptide Sequence:** SFNFNTLLGEEWKLWLIK

**Total Number of Spectra:** 1

**Number of Replicates (out of 10):** 1

**Best Match Score:** 89.028

**Best Match Posterior Error Probability:** 1.85E-05

**Best Match Spectrum:**

**Scan number** 6114      **Raw file** Prt-OGE-Batch3-WT-Frac7  
**Method** ITMS; CID      **Genenames** C4orf33

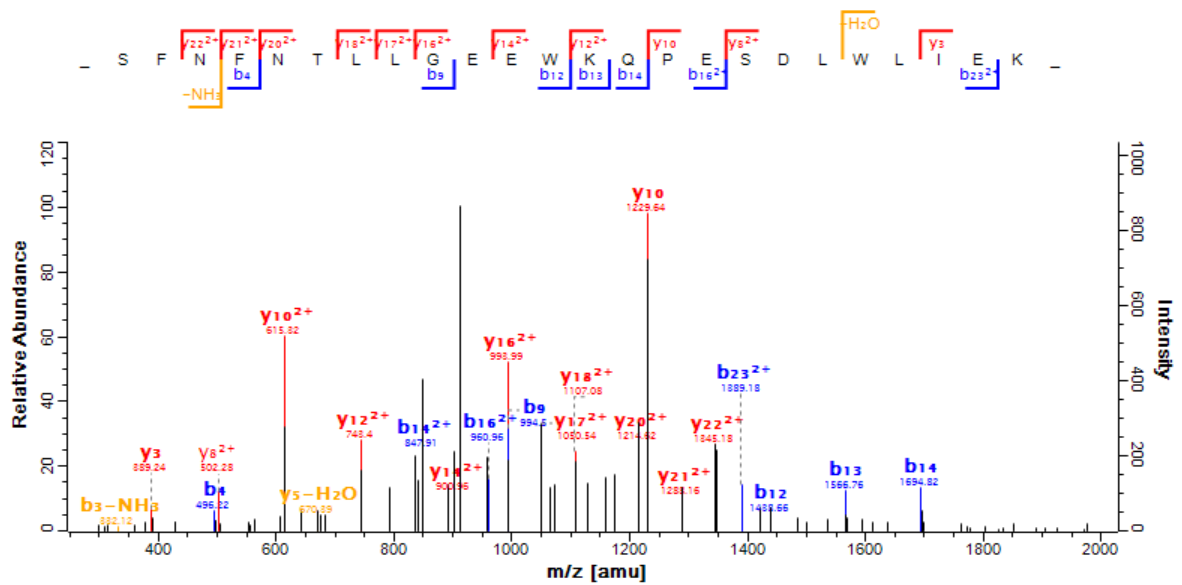

**Protein Group ID:** 2715

**Protein Accession Numbers:** Q8N3V7; Q8N3V7-2; Q8N3V7-3

**Gene Names:** SYNPO

**Peptide Sequence:** VTPNPDLLDLVQTAEK

**Total Number of Spectra:** 1

**Number of Replicates (out of 10):** 1

**Best Match Score:** 98.796

**Best Match Posterior Error Probability:** 0.00027165

**Best Match Spectrum:**

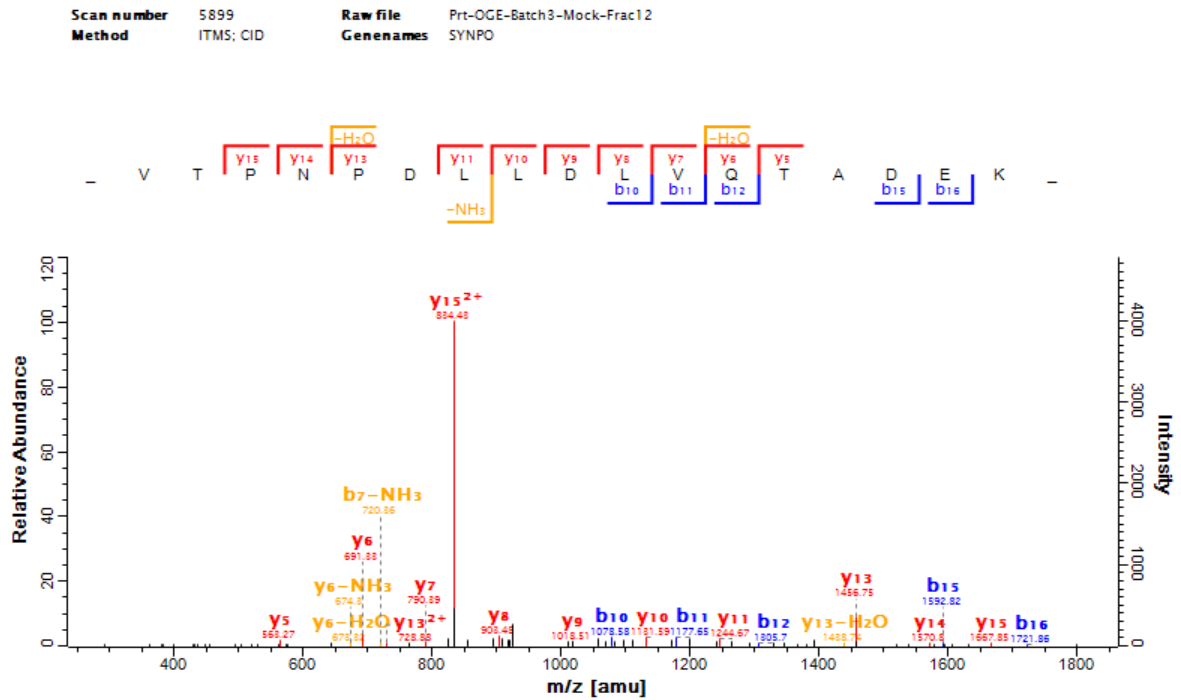

**Protein Group ID:** 2721  
**Protein Accession Numbers:** Q8N5L8  
**Gene Names:** RPP25L  
**Peptide Sequence:** NLLGLALGR  
**Total Number of Spectra:** 3  
**Number of Replicates (out of 10):** 3  
**Best Match Score:** 176.6  
**Best Match Posterior Error Probability:** 3.36E-07  
**Best Match Spectrum:**

**Scan number** 4102      **Raw file** 20100914-KD-Batch4-Prt-OGE-Mock-Frac23  
**Method** ITMS; CID      **Genenames** RPP25L

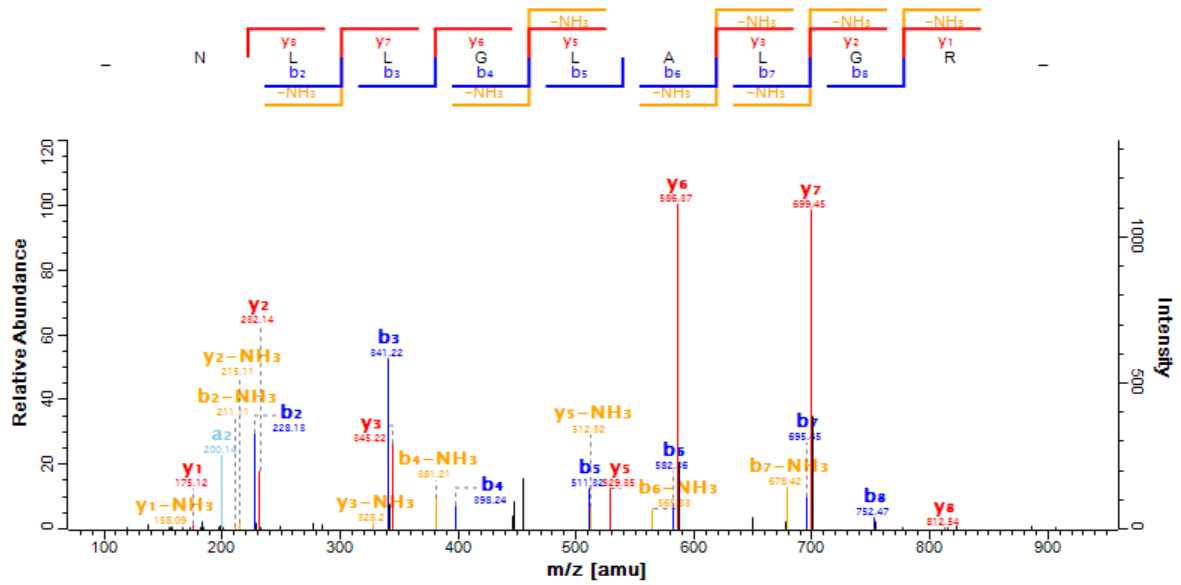

**Protein Group ID:** 2733  
**Protein Accession Numbers:** Q8N8V2  
**Gene Names:** GBP7  
**Peptide Sequence:** SFQENIAQLK  
**Total Number of Spectra:** 3  
**Number of Replicates (out of 10):** 3  
**Best Match Score:** 156.48  
**Best Match Posterior Error Probability:** 3.14E-05  
**Best Match Spectrum:**

**Scan number** 3072      **Raw file** 20100927-KD-Batch4-Prt-OGE-WT-Frac13  
**Method** ITMS; CID      **Genenames** GBP7

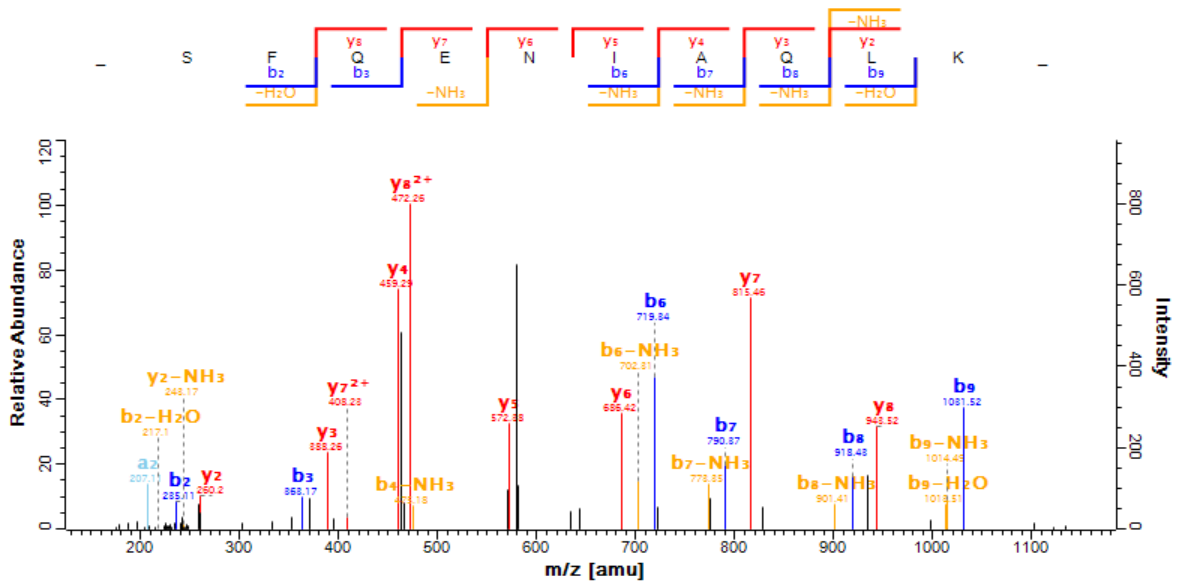



**Protein Group ID:** 2734  
**Protein Accession Numbers:** Q8N8Y2  
**Gene Names:** ATP6V0D2  
**Peptide Sequence:** AFITLNSFGTELSKEDR  
**Total Number of Spectra:** 1  
**Number of Replicates (out of 10):** 1  
**Best Match Score:** 101.42  
**Best Match Posterior Error Probability:** 0.00073403  
**Best Match Spectrum:**

**Scan number** 5410      **Raw file** Prt-OGE-Batch3--Mock-Frac5  
**Method** ITMS; CID      **Genenames** ATP6V0D2

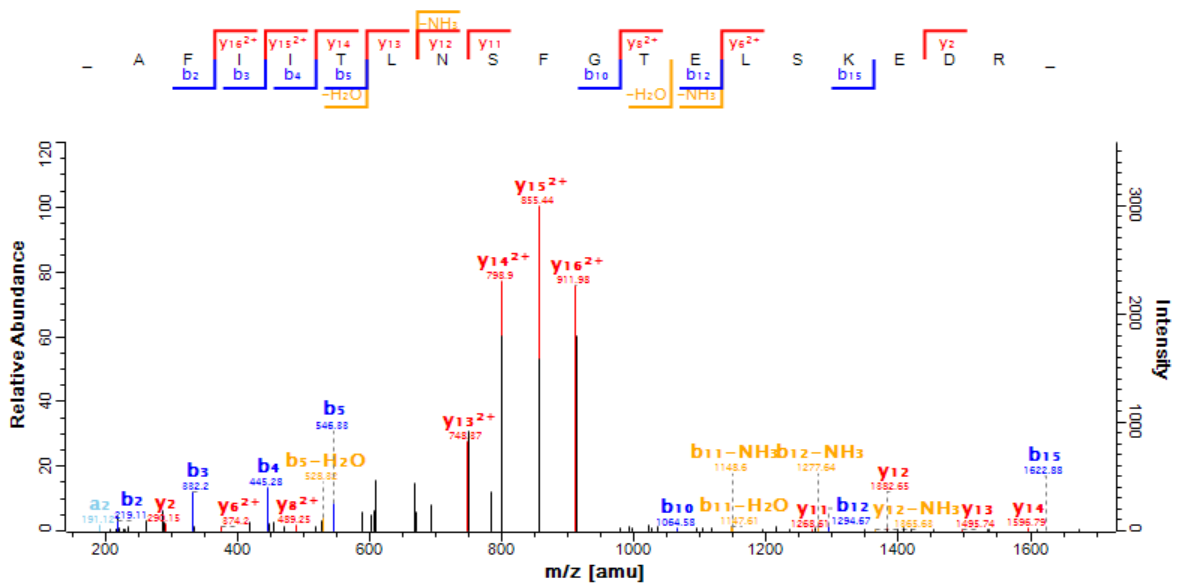

**Protein Group ID:** 2749  
**Protein Accession Numbers:** Q8NDC0  
**Gene Names:** MAPK1IP1L  
**Peptide Sequence:** SDEFSLADALPEHSPAK  
**Total Number of Spectra:** 4  
**Number of Replicates (out of 10):** 3  
**Best Match Score:** 169.02  
**Best Match Posterior Error Probability:** 1.81E-15  
**Best Match Spectrum:**

**Scan number** 4929      **Raw file** OGE-Mock-Frac6  
**Method** ITMS; CID      **Genenames** MAPK1IP1L

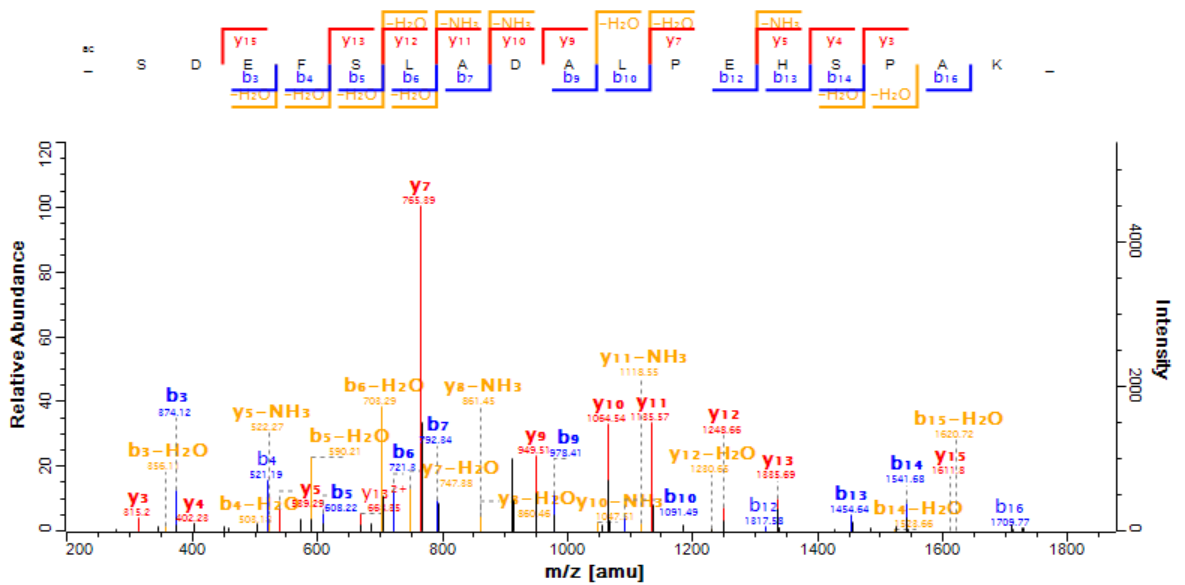

**Protein Group ID:** 2751

**Protein Accession Numbers:** Q8NDI1; Q8NDI1-2; Q8NDI1-3

**Gene Names:** EHBP1

**Peptide Sequence:** EQLLLDELVALVNK

**Total Number of Spectra:** 22

**Number of Replicates (out of 10):** 7

**Best Match Score:** 181.67

**Best Match Posterior Error Probability:** 4.38E-15

**Best Match Spectrum:**

**Scan number** 7952      **Raw file** 20100930-KD-Batch5-Prt-OGE-WT-Frac8  
**Method** ITMS; CID      **Genenames** EHBP1

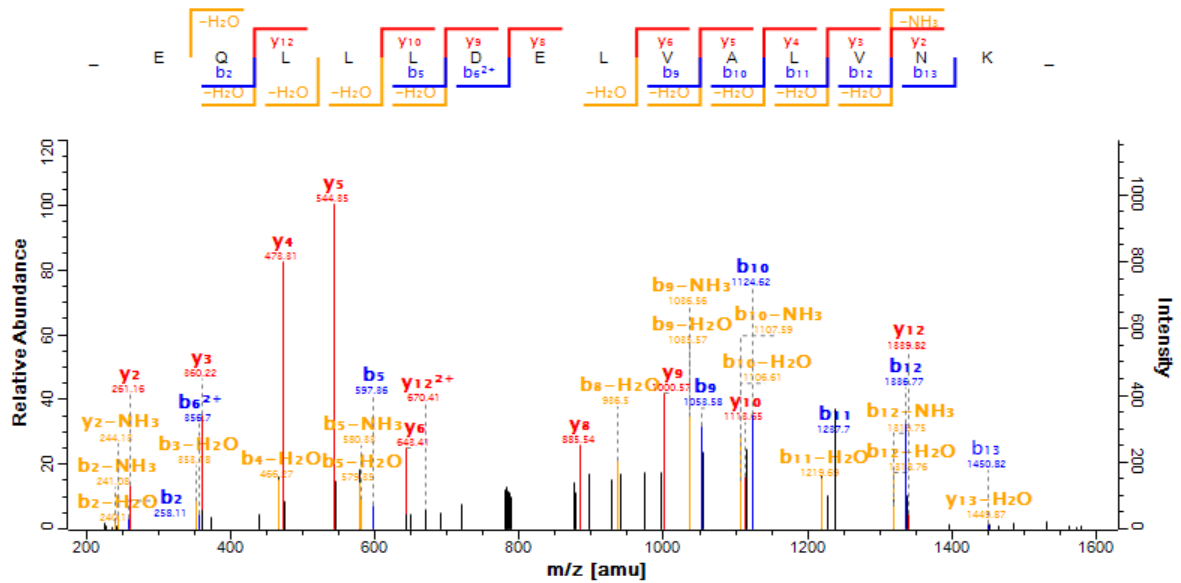

**Protein Group ID:** 2763  
**Protein Accession Numbers:** Q8NHZ8  
**Gene Names:** CDC26  
**Peptide Sequence:** LDDIEEFENIR  
**Total Number of Spectra:** 2  
**Number of Replicates (out of 10):** 2  
**Best Match Score:** 140.14  
**Best Match Posterior Error Probability:** 1.60E-05  
**Best Match Spectrum:**

**Scan number** 4186      **Raw file** 20100914-KD-Batch4-Prt-OGE-Mock-Frac11  
**Method** ITMS; CID      **Genenames** CDC26

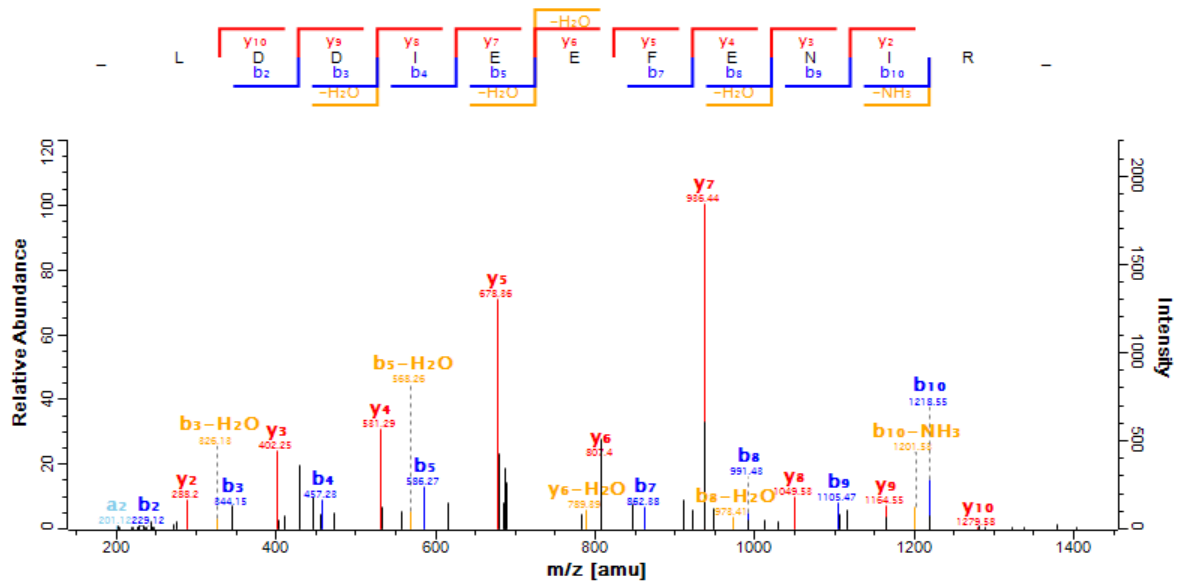

**Protein Group ID:** 2782  
**Protein Accession Numbers:** Q8TF42  
**Gene Names:** UBASH3B  
**Peptide Sequence:** HGSALDVLLSMGFPR  
**Total Number of Spectra:** 2  
**Number of Replicates (out of 10):** 2  
**Best Match Score:** 115.34  
**Best Match Posterior Error Probability:** 5.43E-05  
**Best Match Spectrum:**

**Scan number** 7160      **Raw file** Prt-OGE-Batch2-Mock-Frac15  
**Method** ITMS; CID      **Genenames** UBASH3B

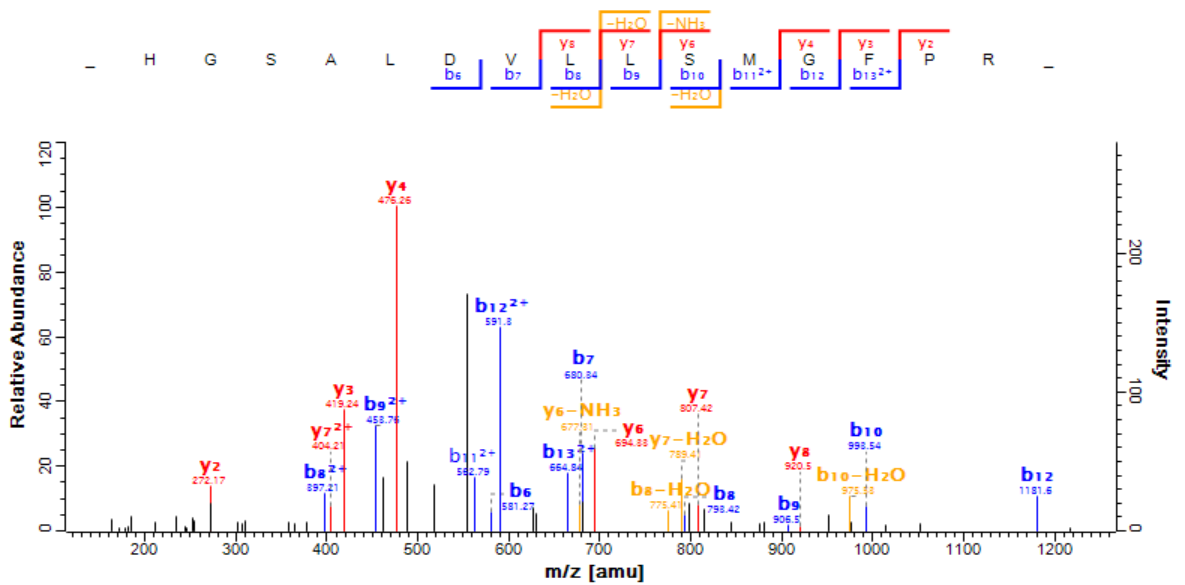

**Protein Group ID:** 2783  
**Protein Accession Numbers:** Q8TF65  
**Gene Names:** GIPC2  
**Peptide Sequence:** LLGGQLGLEDFIFAHVK  
**Total Number of Spectra:** 8  
**Number of Replicates (out of 10):** 8  
**Best Match Score:** 123.76  
**Best Match Posterior Error Probability:** 9.08E-05  
**Best Match Spectrum:**

**Scan number** 6382      **Raw file** 20100917-KD-Batch5-Prt-OGE-Mock-Frac13  
**Method** ITMS; CID      **Genenames** GIPC2

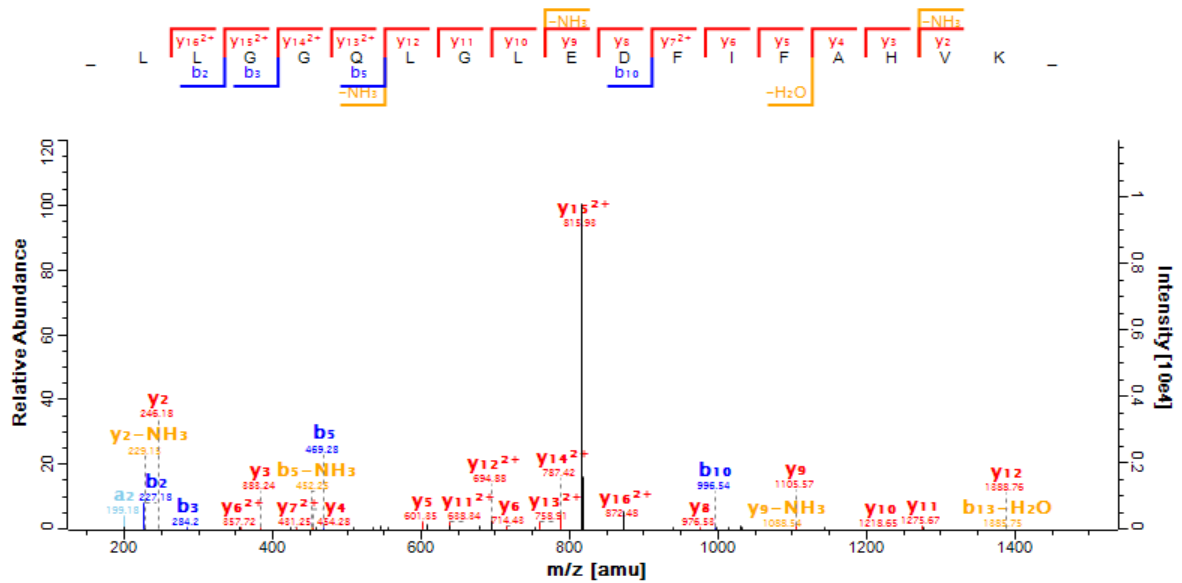

**Protein Group ID:** 2786

**Protein Accession Numbers:** Q8WUA8

**Gene Names:** TSKU

**Peptide Sequence:** YLSLDGNPLAVIGPGAFAGLGGGLTHLSLASLQR

**Total Number of Spectra:** 1

**Number of Replicates (out of 10):** 1

**Best Match Score:** 52.96

**Best Match Posterior Error Probability:** 0.00032262

**Best Match Spectrum:**

**Scan number** 8484      **Raw file** 20100930-KD-Batch5-Prt-OGE-WT-Frac15  
**Method** ITMS; CID      **Genenames** TSKU

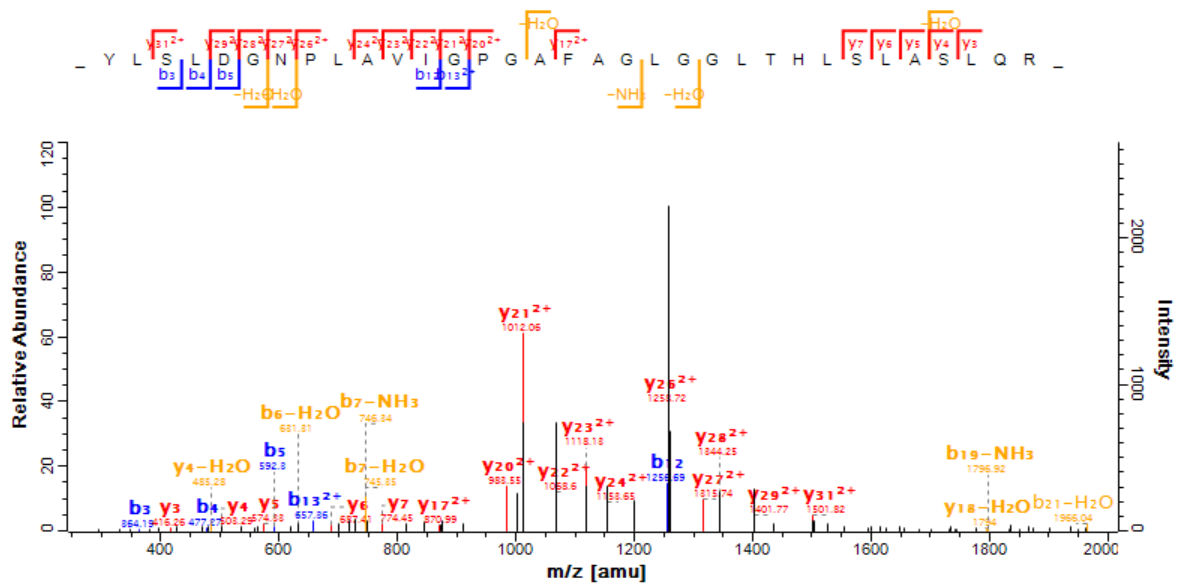

**Protein Group ID:** 2790  
**Protein Accession Numbers:** Q8WV74; Q8WV74-2  
**Gene Names:** NUDT8  
**Peptide Sequence:** GVPALLYLTYLR  
**Total Number of Spectra:** 1  
**Number of Replicates (out of 10):** 1  
**Best Match Score:** 85.533  
**Best Match Posterior Error Probability:** 0.001677  
**Best Match Spectrum:**

**Scan number** 4701      **Raw file** 20100917-KD-Batch5-Prt-OGE-Mock-Frac20  
**Method** ITMS; CID      **Genenames** NUDT8

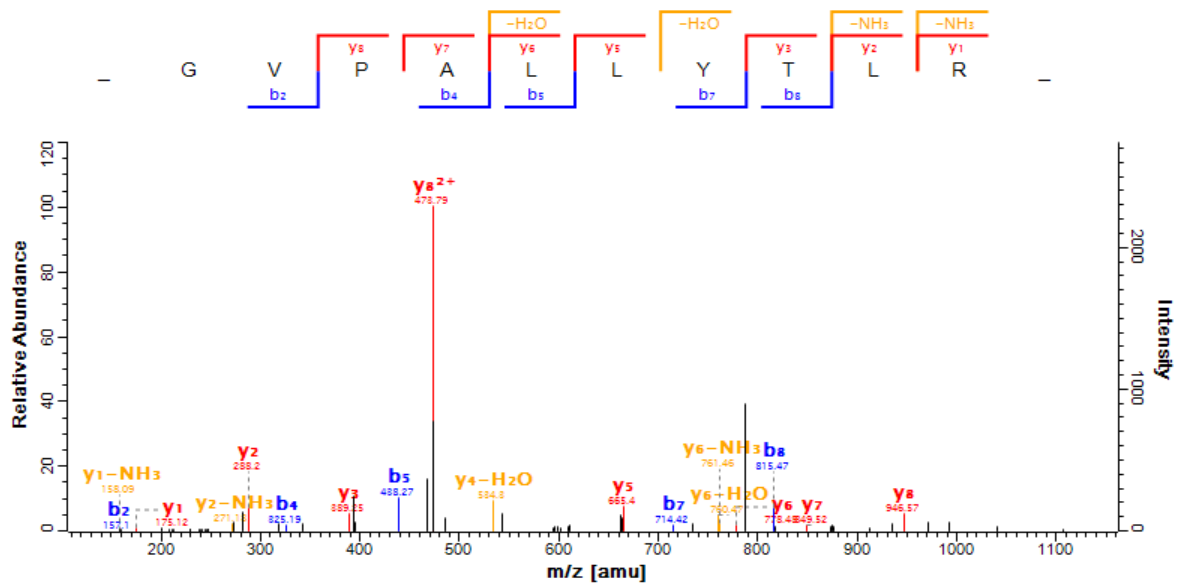



**Protein Group ID:** 2808  
**Protein Accession Numbers:** Q92506  
**Gene Names:** HSD17B8  
**Peptide Sequence:** GNHAAFQADVSEAR  
**Total Number of Spectra:** 2  
**Number of Replicates (out of 10):** 2  
**Best Match Score:** 81.565  
**Best Match Posterior Error Probability:** 0.0014588  
**Best Match Spectrum:**

**Scan number** 1378      **Raw file** 20100914-KD-Batch4-Prt-OGE-Mock-Frac13  
**Method** ITMS; CID      **Genenames** HSD17B8

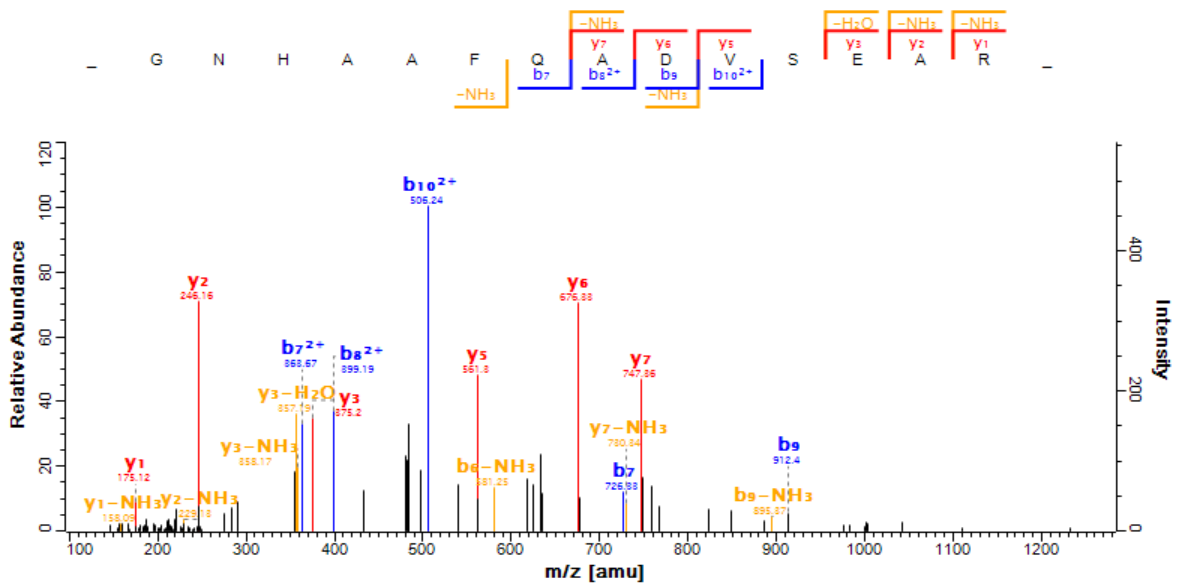

**Protein Group ID:** 2811  
**Protein Accession Numbers:** Q92567; Q92567-2  
**Gene Names:** FAM168A  
**Peptide Sequence:** TYQASSAAFR  
**Total Number of Spectra:** 1  
**Number of Replicates (out of 10):** 1  
**Best Match Score:** 85.288  
**Best Match Posterior Error Probability:** 0.001731  
**Best Match Spectrum:**

|                    |           |                  |                            |
|--------------------|-----------|------------------|----------------------------|
| <b>Scan number</b> | 1740      | <b>Raw file</b>  | Prt-OGE-Batch2-Mock-Frac20 |
| <b>Method</b>      | ITMS; CID | <b>Genenames</b> | FAM168A                    |

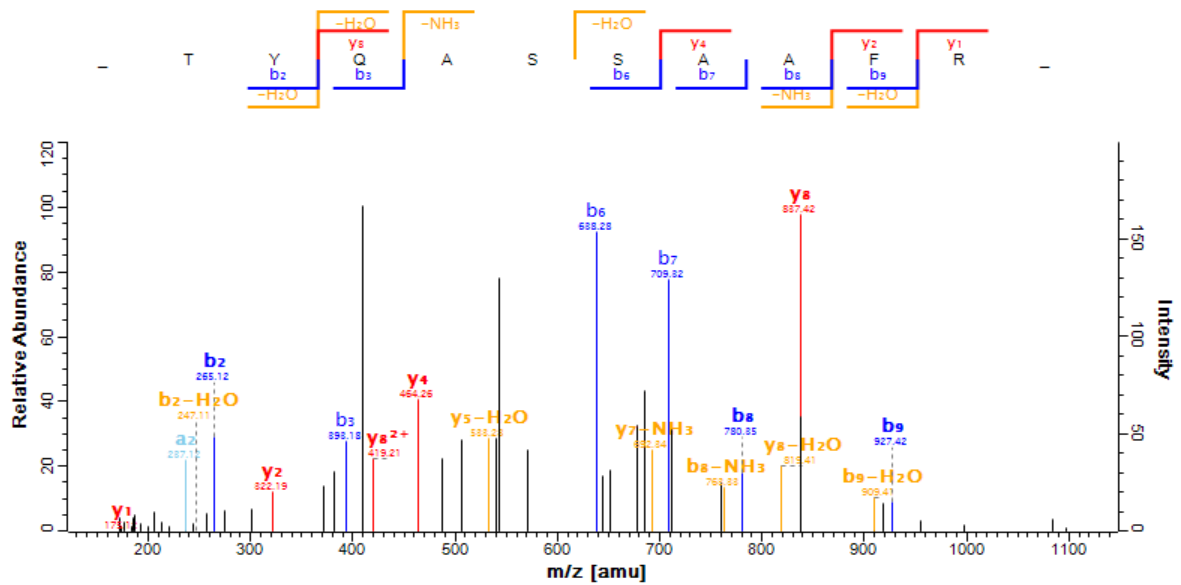

**Protein Group ID:** 2825  
**Protein Accession Numbers:** Q92871  
**Gene Names:** PMM1  
**Peptide Sequence:** TVGHSVSPQDTVQR  
**Total Number of Spectra:** 3  
**Number of Replicates (out of 10):** 2  
**Best Match Score:** 89.231  
**Best Match Posterior Error Probability:** 0.0003648  
**Best Match Spectrum:**

**Scan number** 1558      **Raw file** Prt-OGE-Batch3--Mock-Frac9  
**Method** ITMS; CID      **Genenames** PMM1

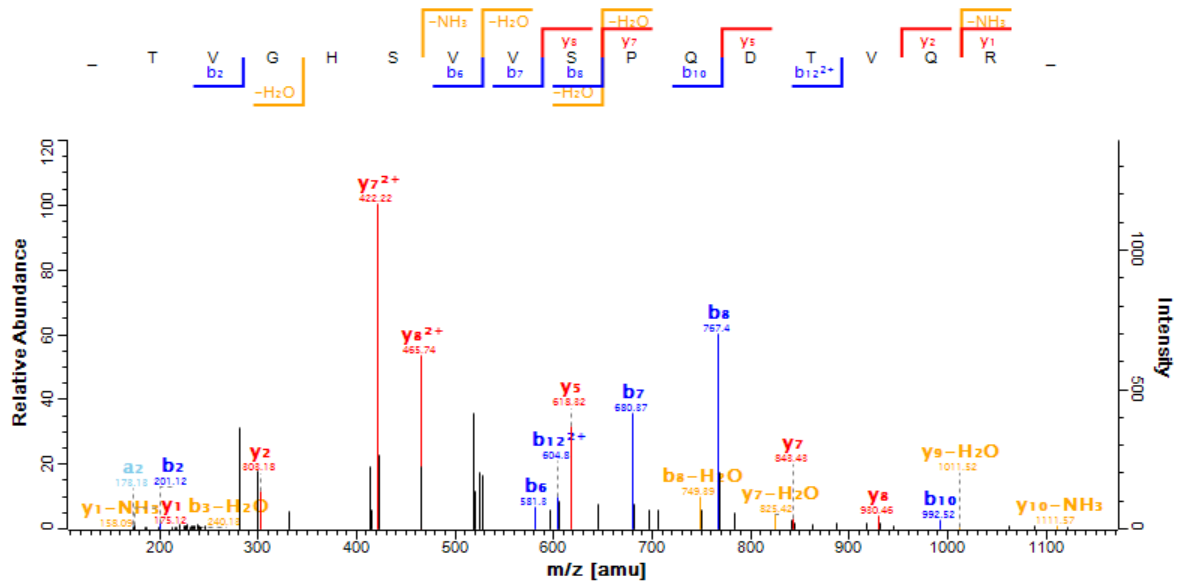

**Protein Group ID:** 2833  
**Protein Accession Numbers:** Q92934  
**Gene Names:** BAD  
**Peptide Sequence:** HSSYPAGTEDDEGMGEEPSFR  
**Total Number of Spectra:** 2  
**Number of Replicates (out of 10):** 2  
**Best Match Score:** 185.85  
**Best Match Posterior Error Probability:** 2.32E-39  
**Best Match Spectrum:**

**Scan number** 3358      **Raw file** Prt-OGE-Batch3--Mock-Frac13  
**Method** ITMS; CID      **Genenames** BAD

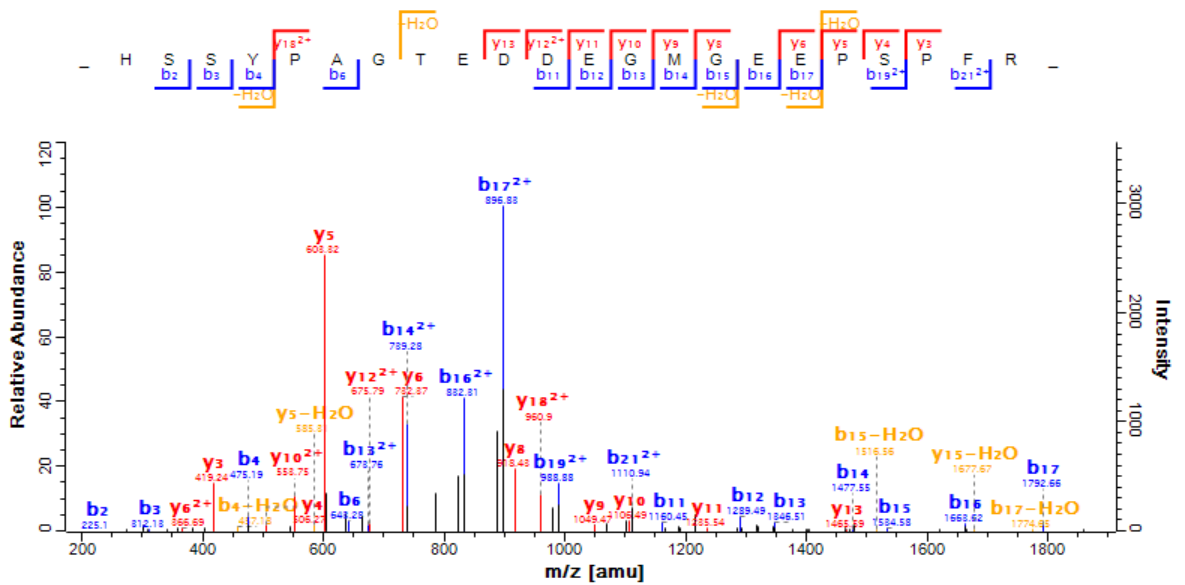

**Protein Group ID:** 2839  
**Protein Accession Numbers:** Q969E8  
**Gene Names:** TSR2  
**Peptide Sequence:** WLGGAVEDYFM R  
**Total Number of Spectra:** 15  
**Number of Replicates (out of 10):** 8  
**Best Match Score:** 132.76  
**Best Match Posterior Error Probability:** 0.00013304  
**Best Match Spectrum:**

**Scan number** 5908      **Raw file** Prt-OGE-Batch2-Mock-Frac5  
**Method** ITMS; CID      **Genenames** TSR2

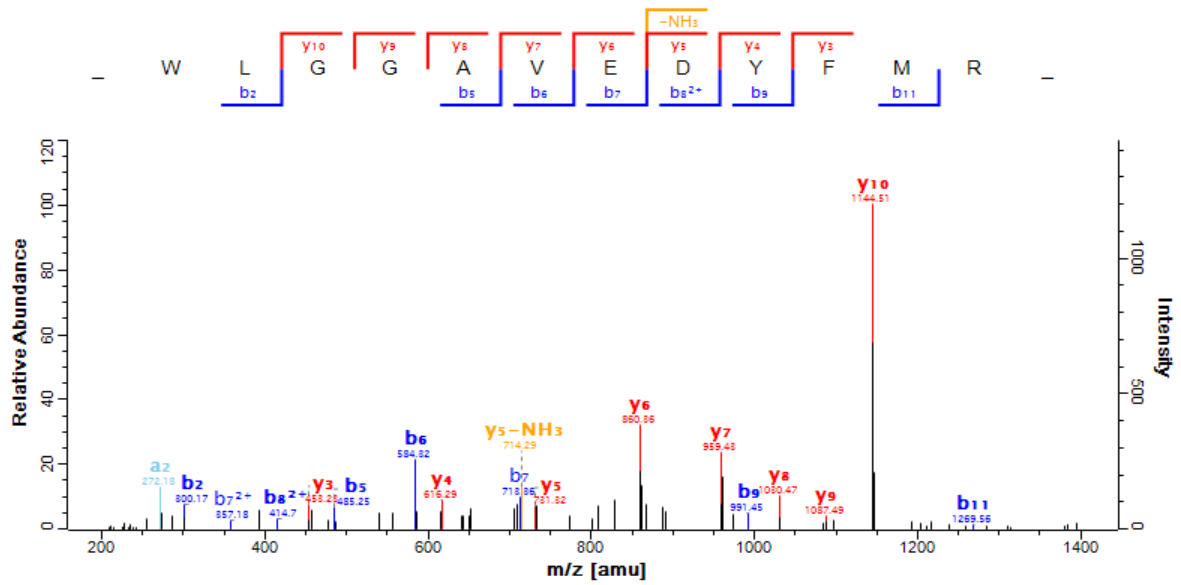

**Protein Group ID:** 2846  
**Protein Accession Numbers:** Q96A19  
**Gene Names:** CCDC102A  
**Peptide Sequence:** LETEKLGLER  
**Total Number of Spectra:** 2  
**Number of Replicates (out of 10):** 2  
**Best Match Score:** 105.2  
**Best Match Posterior Error Probability:** 0.0014538  
**Best Match Spectrum:**

**Scan number** 2656      **Raw file** 20100927-KD-Batch4-Prt-OGE-WT-Frac9  
**Method** ITMS; CID      **Genenames** CCDC102A

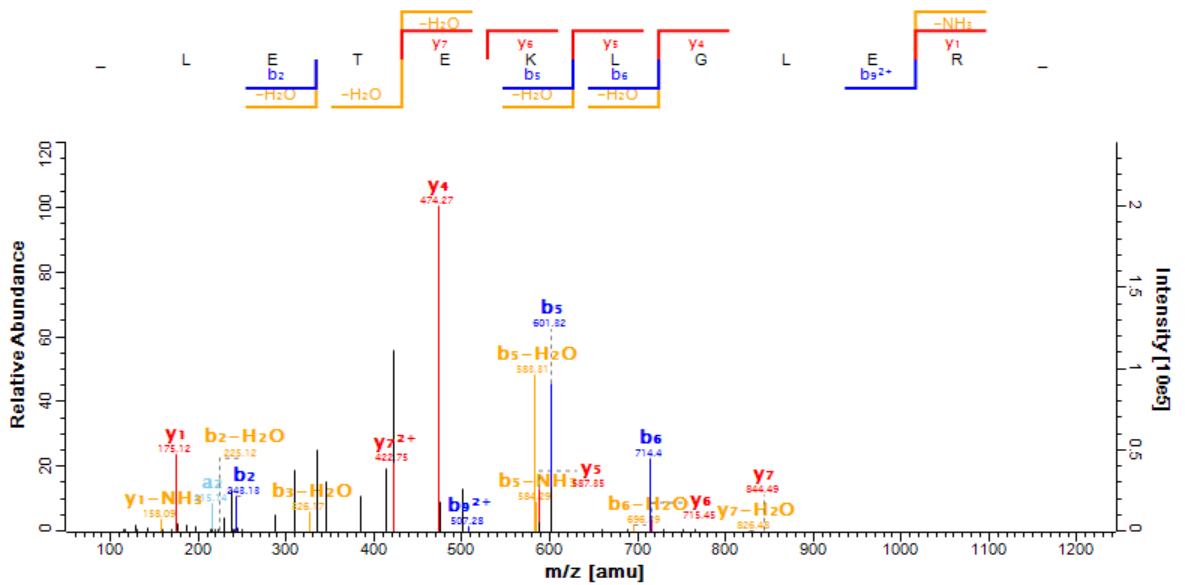

**Protein Group ID:** 2862

**Protein Accession Numbers:** Q96BN8

**Gene Names:** FAM105B

**Peptide Sequence:** ATLFQAMSQAVGLPPWLQDPELMLLPK

**Total Number of Spectra:** 5

**Number of Replicates (out of 10):** 4

**Best Match Score:** 84.404

**Best Match Posterior Error Probability:** 6.98E-07

**Best Match Spectrum:**

**Scan number** 8735      **Raw file** 20100914-KD-Batch4-Prt-OGE-Mock-Frac9  
**Method** ITMS; CID      **Genenames** FAM105B

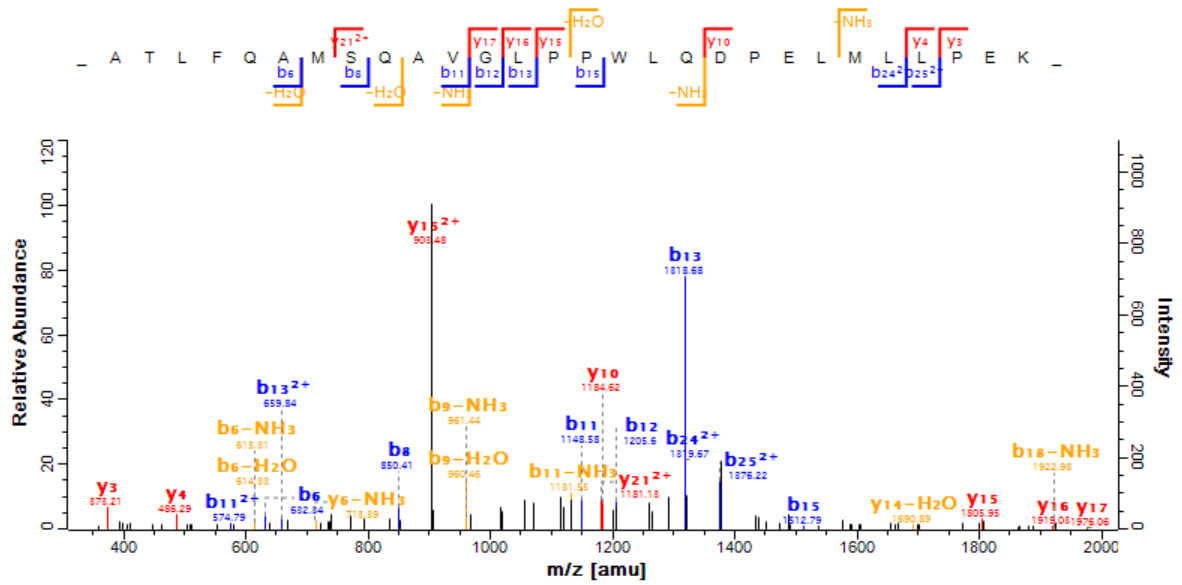

**Protein Group ID:** 2878  
**Protein Accession Numbers:** Q96D53; Q96D53-2  
**Gene Names:** ADCK4  
**Peptide Sequence:** LANFGGLAVGLGLGVLAEMAK  
**Total Number of Spectra:** 2  
**Number of Replicates (out of 10):** 2  
**Best Match Score:** 93.381  
**Best Match Posterior Error Probability:** 4.08E-05  
**Best Match Spectrum:**

**Scan number** 8418      **Raw file** 20100927-KD-Batch4-Prt-OGE-WT-Frac14  
**Method** ITMS; CID      **Genenames** ADCK4

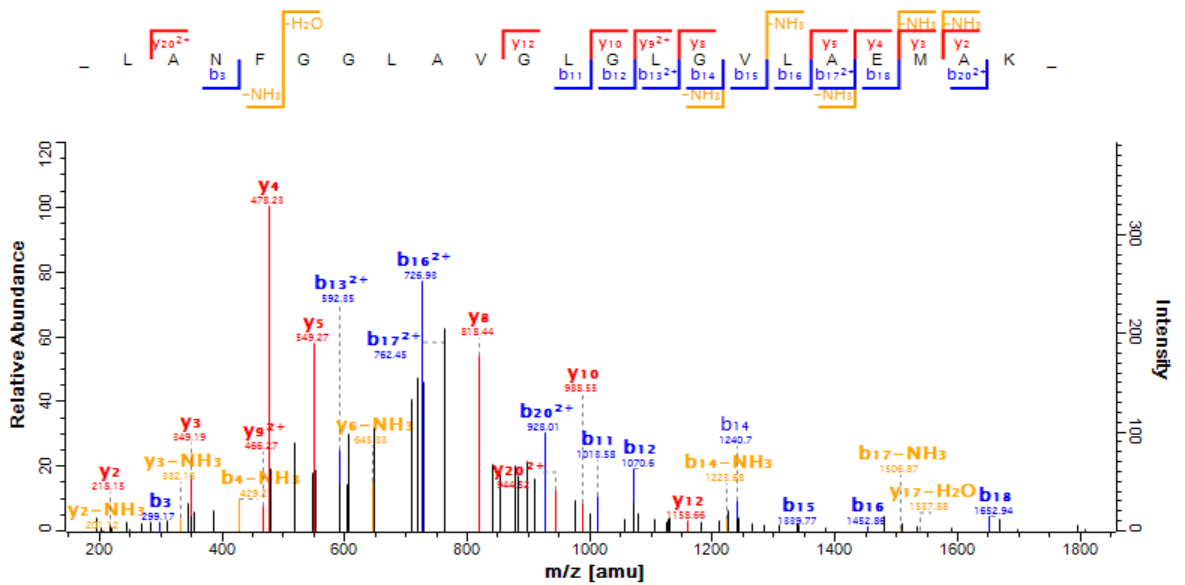



**Protein Group ID:** 2895

**Protein Accession Numbers:** Q96EM0

**Gene Names:** C14orf149

**Peptide Sequence:** LPPHDPGTPVLSVVDMMHTGGEPLR

**Total Number of Spectra:** 1

**Number of Replicates (out of 10):** 1

**Best Match Score:** 65.085

**Best Match Posterior Error Probability:** 0.00050949

**Best Match Spectrum:**

|                    |           |                  |                                      |
|--------------------|-----------|------------------|--------------------------------------|
| <b>Scan number</b> | 4572      | <b>Raw file</b>  | 20100927-KD-Batch4-Prt-OGE-WT-Frac14 |
| <b>Method</b>      | ITMS; CID | <b>Genenames</b> | C14orf149                            |

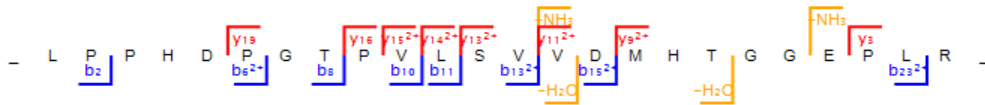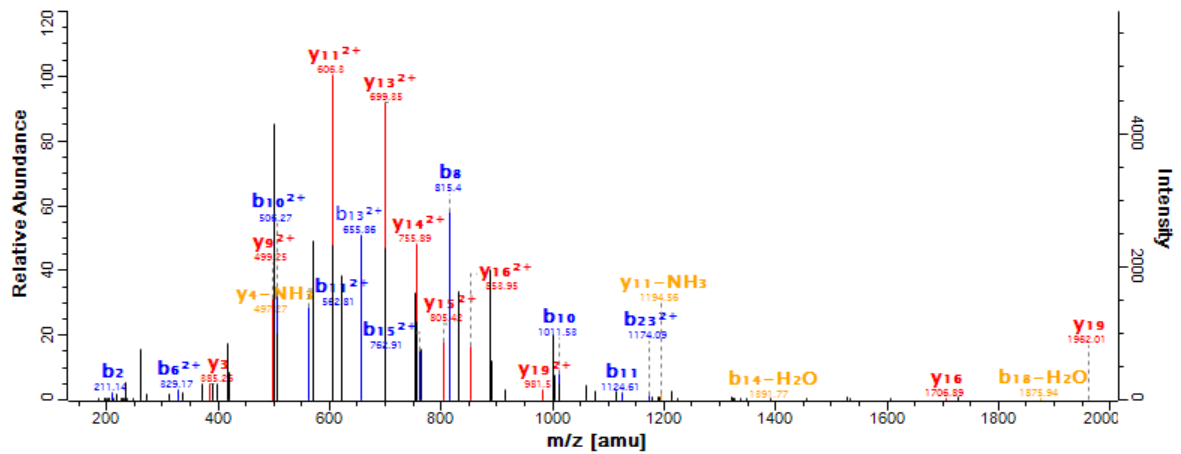

**Protein Group ID:** 2899  
**Protein Accession Numbers:** Q96EY7  
**Gene Names:** PTCD3  
**Peptide Sequence:** SSFIIYDIMNELMGK  
**Total Number of Spectra:** 9  
**Number of Replicates (out of 10):** 7  
**Best Match Score:** 139.66  
**Best Match Posterior Error Probability:** 1.55E-06  
**Best Match Spectrum:**

**Scan number** 8904      **Raw file** 20100930-KD-Batch5-Prt-OGE-WT-Frac13  
**Method** ITMS; CID      **Genenames** PTCD3

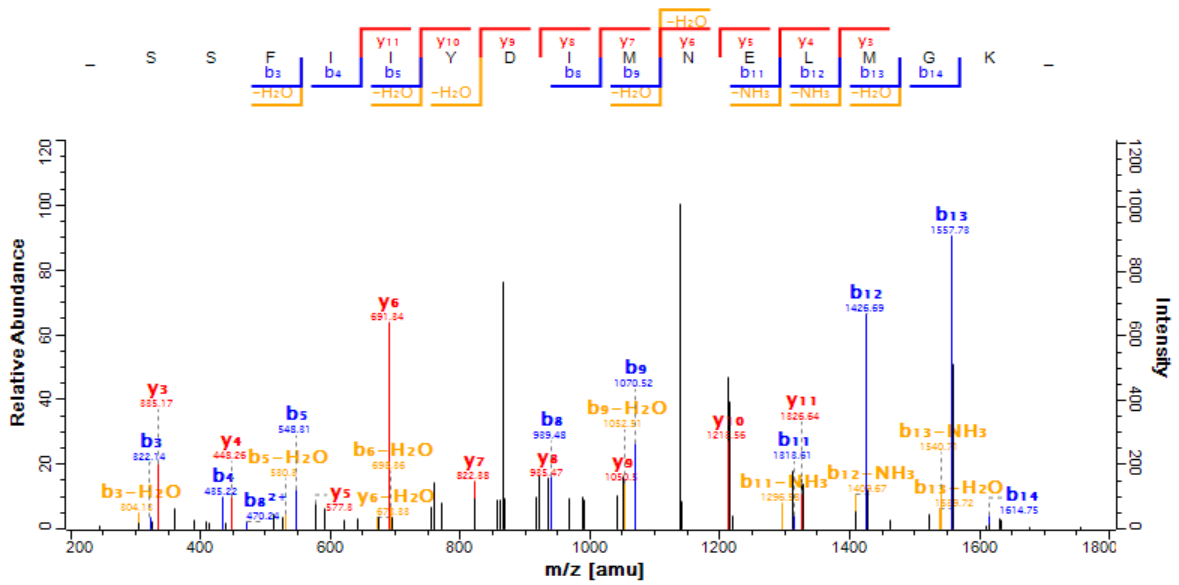



**Protein Group ID:** 2908  
**Protein Accession Numbers:** Q96GD0  
**Gene Names:** PDXP  
**Peptide Sequence:** LAGDPSAGDGAAPR  
**Total Number of Spectra:** 1  
**Number of Replicates (out of 10):** 1  
**Best Match Score:** 89.46  
**Best Match Posterior Error Probability:** 0.00067972  
**Best Match Spectrum:**

**Scan number** 801      **Raw file** 20100930-KD-Batch5-Prt-OGE-WT-Frac14  
**Method** ITMS; CID      **Genenames** PDXP

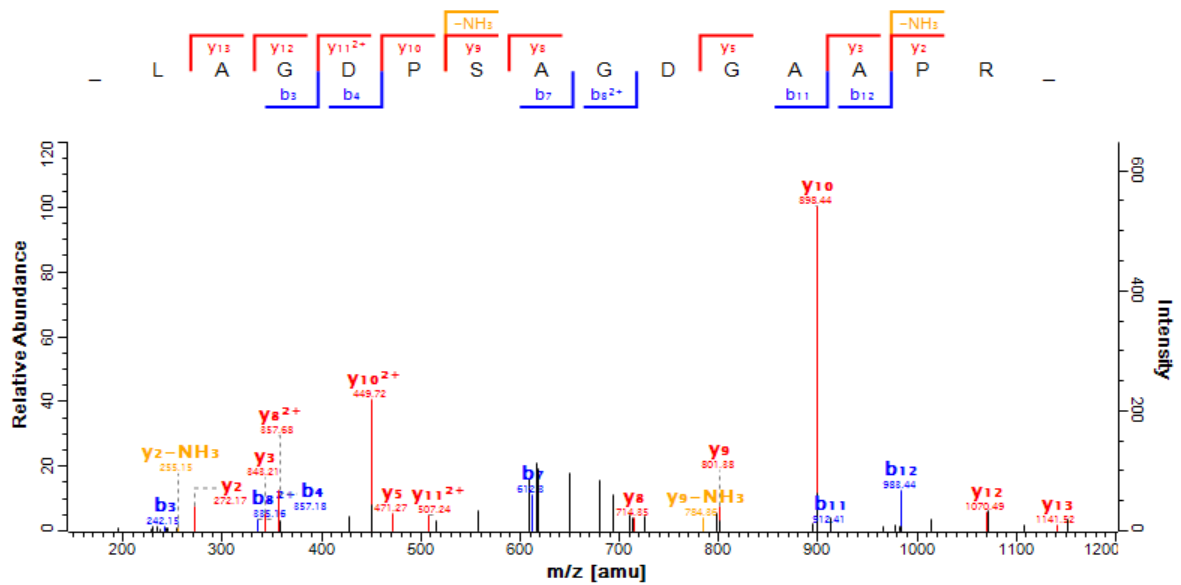

**Protein Group ID:** 2910  
**Protein Accession Numbers:** Q96GX2  
**Gene Names:** ATXN7L3B  
**Peptide Sequence:** DFGIQPVEDK  
**Total Number of Spectra:** 7  
**Number of Replicates (out of 10):** 7  
**Best Match Score:** 137.89  
**Best Match Posterior Error Probability:** 6.66E-05  
**Best Match Spectrum:**

**Scan number** 3494      **Raw file** OGE-Mock-Frac2  
**Method** ITMS; CID      **Genenames** ATXN7L3B

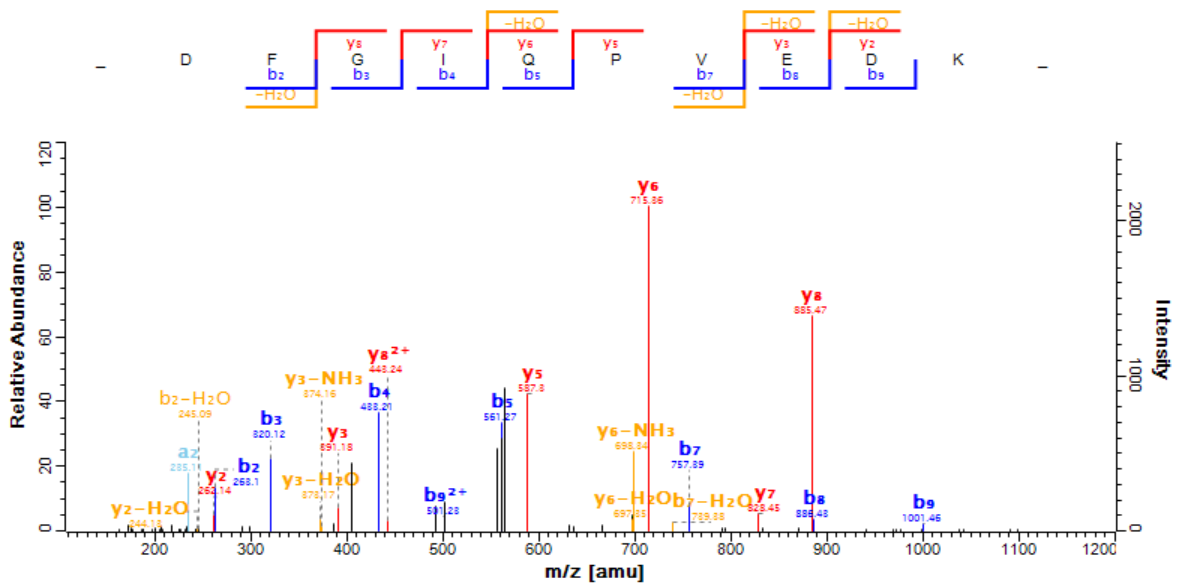

**Protein Group ID:** 2916  
**Protein Accession Numbers:** Q96HY6  
**Gene Names:** DDRGK1  
**Peptide Sequence:** FIYTPEELAAVAVANFIR  
**Total Number of Spectra:** 2  
**Number of Replicates (out of 10):** 2  
**Best Match Score:** 145.81  
**Best Match Posterior Error Probability:** 3.59E-07  
**Best Match Spectrum:**

**Scan number** 6626      **Raw file** OGE-WT-Frac5  
**Method** ITMS; CID      **Genenames** DDRGK1

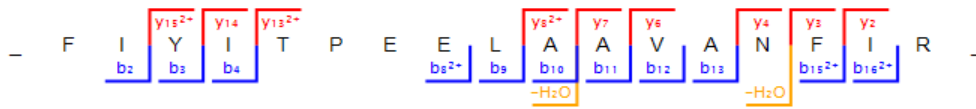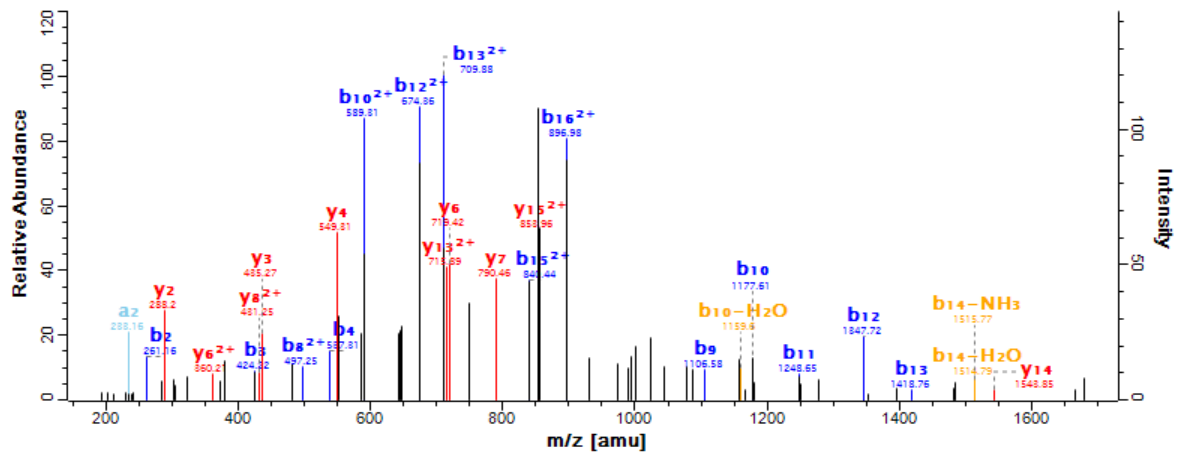

**Protein Group ID:** 2924  
**Protein Accession Numbers:** Q96JB2; Q96JB2-2  
**Gene Names:** COG3  
**Peptide Sequence:** AEAALLLLPEAAAER  
**Total Number of Spectra:** 1  
**Number of Replicates (out of 10):** 1  
**Best Match Score:** 89.911  
**Best Match Posterior Error Probability:** 0.00032056  
**Best Match Spectrum:**

**Scan number** 5880      **Raw file** Prt-OGE-Batch3-WT-Frac9  
**Method** ITMS; CID      **Genenames** COG3

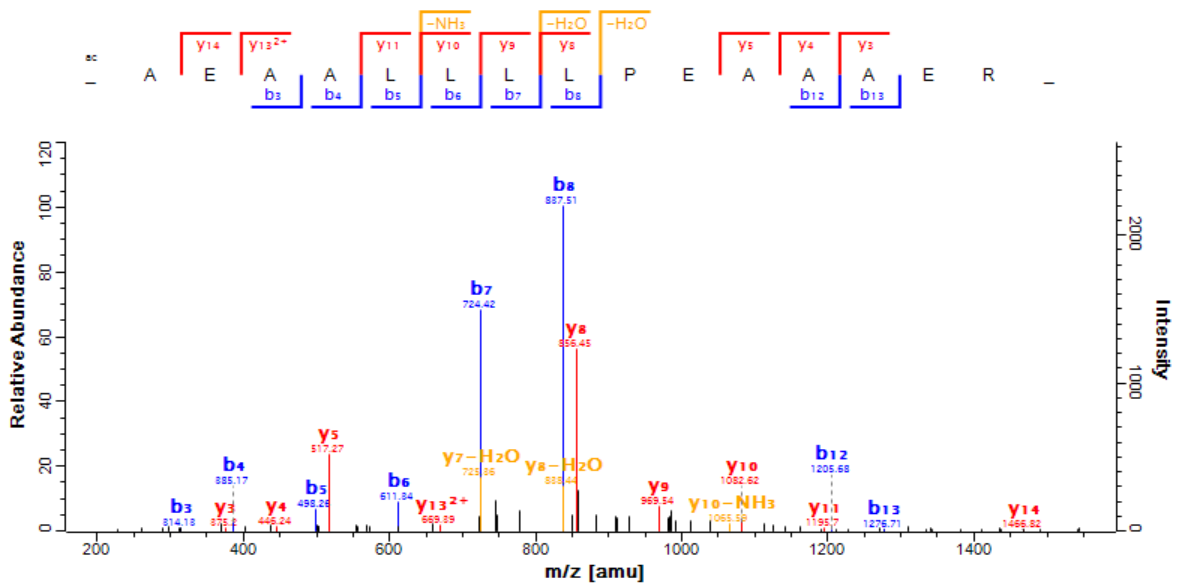

**Protein Group ID:** 2926  
**Protein Accession Numbers:** Q96JP5; Q96JP5-2  
**Gene Names:** ZFP91  
**Peptide Sequence:** PGETEERPRPEQQDQEGGEEAAK  
**Total Number of Spectra:** 1  
**Number of Replicates (out of 10):** 1  
**Best Match Score:** 75.564  
**Best Match Posterior Error Probability:** 0.0014059  
**Best Match Spectrum:**

**Scan number** 851      **Raw file** 20100930-KD-Batch5-Prt-OGE-WT-Frac15  
**Method** ITMS; CID      **Genenames** ZFP91

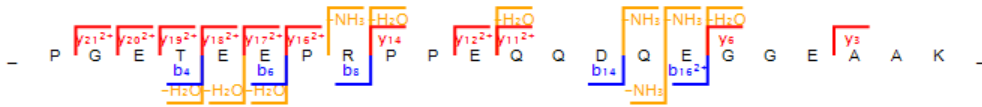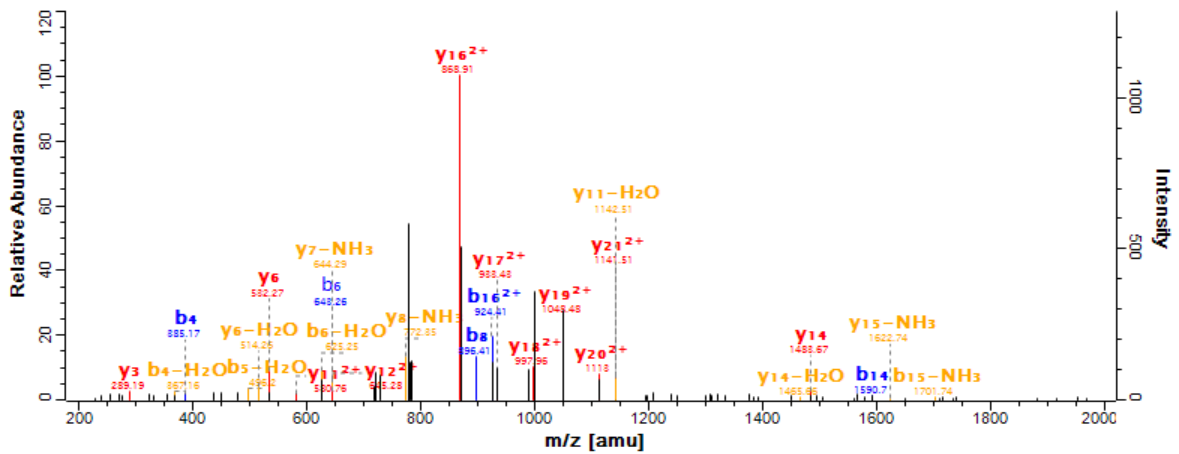



**Protein Group ID:** 2934  
**Protein Accession Numbers:** Q96NL8  
**Gene Names:** C8orf37  
**Peptide Sequence:** AEDLDELLDEVESK  
**Total Number of Spectra:** 1  
**Number of Replicates (out of 10):** 1  
**Best Match Score:** 112.08  
**Best Match Posterior Error Probability:** 0.00012715  
**Best Match Spectrum:**

**Scan number** 5918      **Raw file** Prt-OGE-Batch2-WT-Frac15  
**Method** ITMS; CID      **Genenames** C8orf37

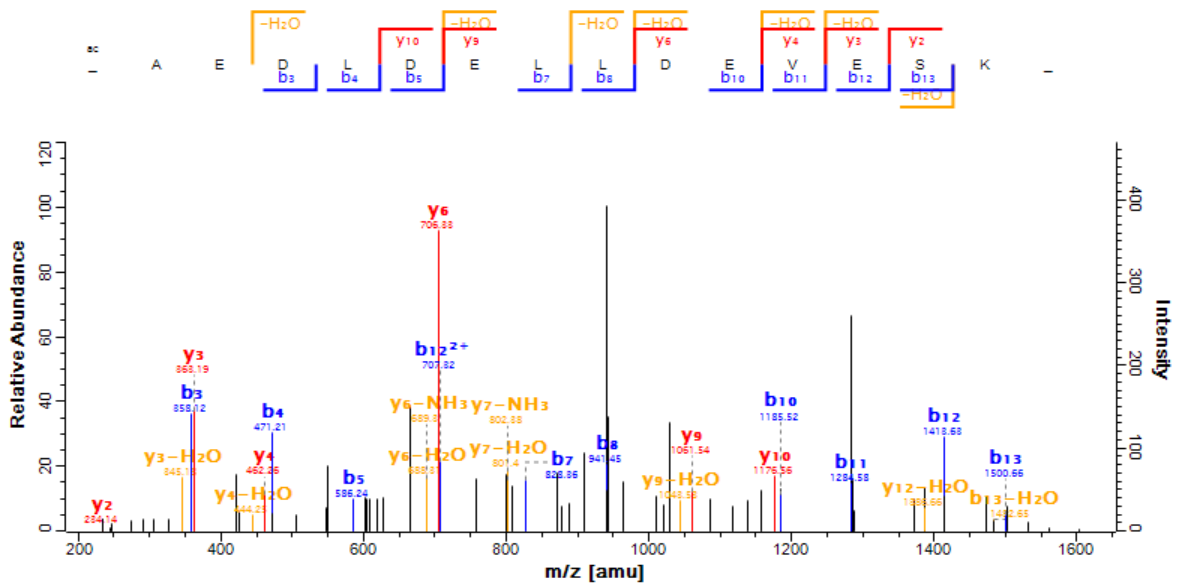

**Protein Group ID:** 2935  
**Protein Accession Numbers:** Q96NT1  
**Gene Names:** NAP1L5  
**Peptide Sequence:** NDFIESLPNSVK  
**Total Number of Spectra:** 6  
**Number of Replicates (out of 10):** 6  
**Best Match Score:** 138.02  
**Best Match Posterior Error Probability:** 8.40E-05  
**Best Match Spectrum:**

**Scan number** 3277      **Raw file** OGE-WT-Frac2  
**Method** ITMS; CID      **Genenames** NAP1L5

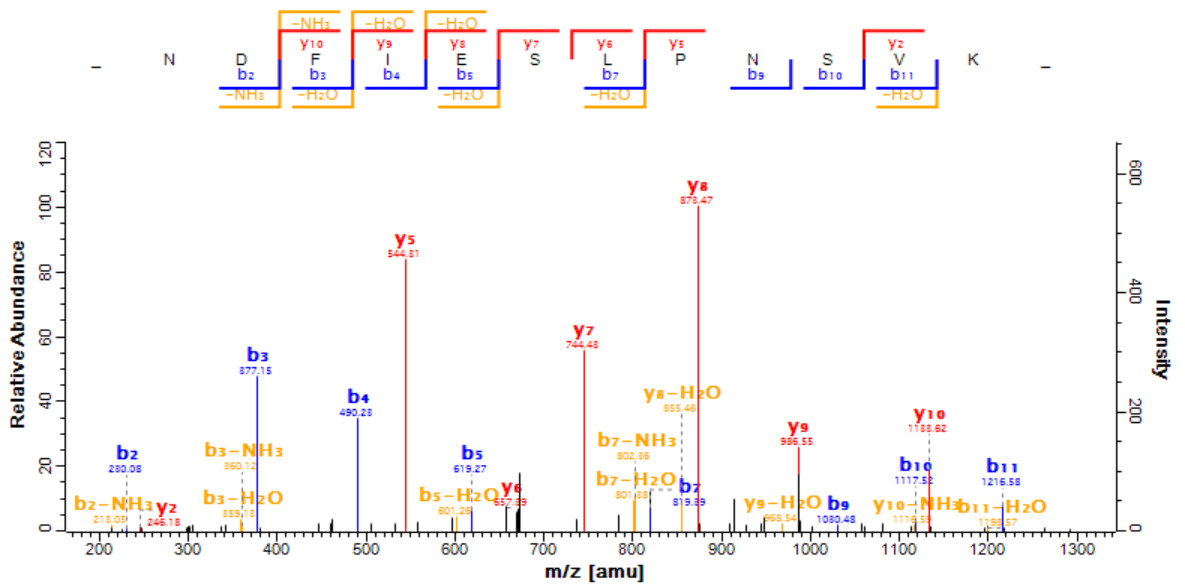

**Protein Group ID:** 2937  
**Protein Accession Numbers:** Q96P70  
**Gene Names:** IPO9  
**Peptide Sequence:** EALVDTLTGILSPVQEV  
**Total Number of Spectra:** 1  
**Number of Replicates (out of 10):** 1  
**Best Match Score:** 81.317  
**Best Match Posterior Error Probability:** 0.0010712  
**Best Match Spectrum:**

**Scan number** 4956      **Raw file** Prt-OGE-Batch3-WT-Frac1  
**Method** ITMS; CID      **Genenames** IPO9

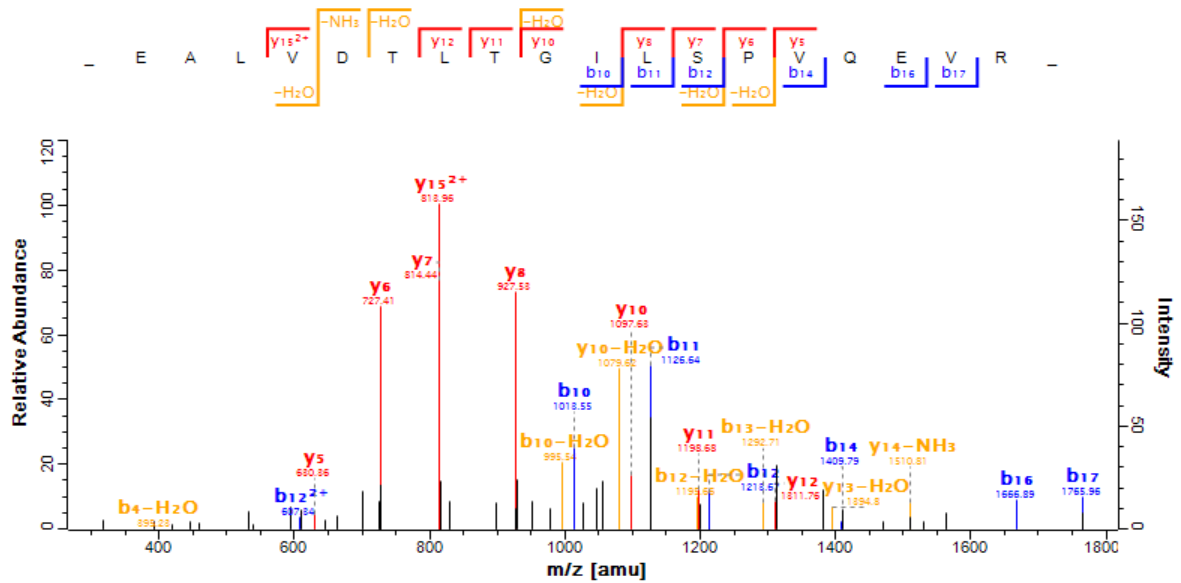



**Protein Group ID:** 2942  
**Protein Accession Numbers:** Q96PX9  
**Gene Names:** PLEKHG4B  
**Peptide Sequence:** PQSDALLSSHGNAFFK  
**Total Number of Spectra:** 3  
**Number of Replicates (out of 10):** 1  
**Best Match Score:** 91.812  
**Best Match Posterior Error Probability:** 0.0003727  
**Best Match Spectrum:**

**Scan number** 3307      **Raw file** OGE-Mock-Frac19  
**Method** ITMS; CID      **Genenames** PLEKHG4B

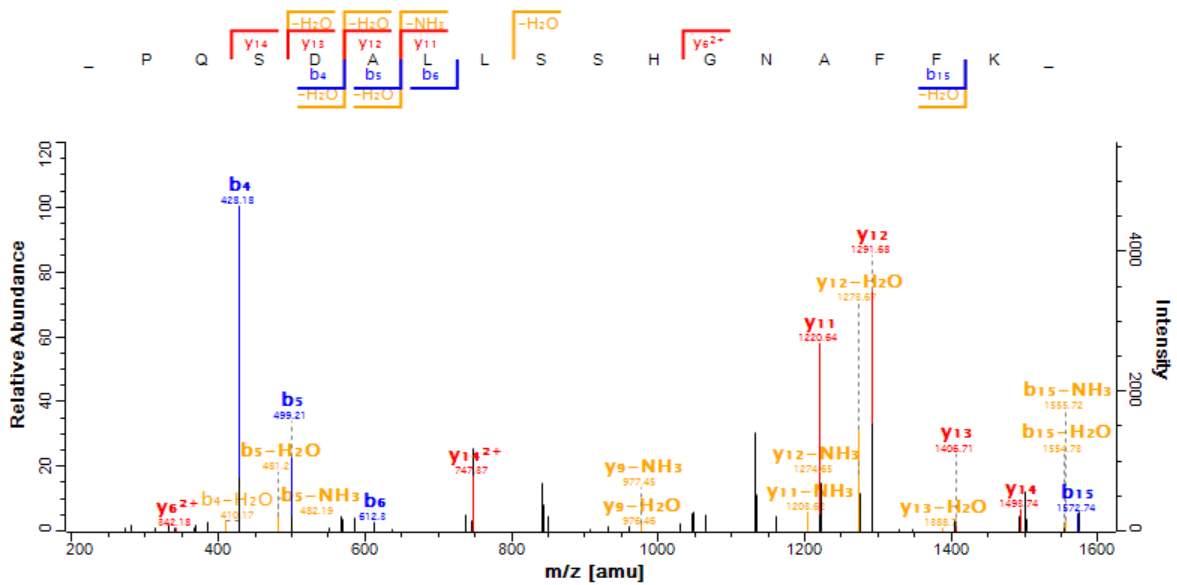

**Protein Group ID:** 2950

**Protein Accession Numbers:** Q96SI9; Q96SI9-2; Q5JPA5; E9PKQ0

**Gene Names:** STRBP;DKFZp434P151

**Peptide Sequence:** HSTIYPSPEELEAVQNMVSTVECALK

**Total Number of Spectra:** 2

**Number of Replicates (out of 10):** 2

**Best Match Score:** 87.326

**Best Match Posterior Error Probability:** 1.31E-07

**Best Match Spectrum:**

|                    |           |                  |                                        |
|--------------------|-----------|------------------|----------------------------------------|
| <b>Scan number</b> | 7402      | <b>Raw file</b>  | 20100917-KD-Batch5-Prt-OGE-Mock-Frac20 |
| <b>Method</b>      | ITMS; CID | <b>Genenames</b> | STRBP;DKFZp434P151                     |

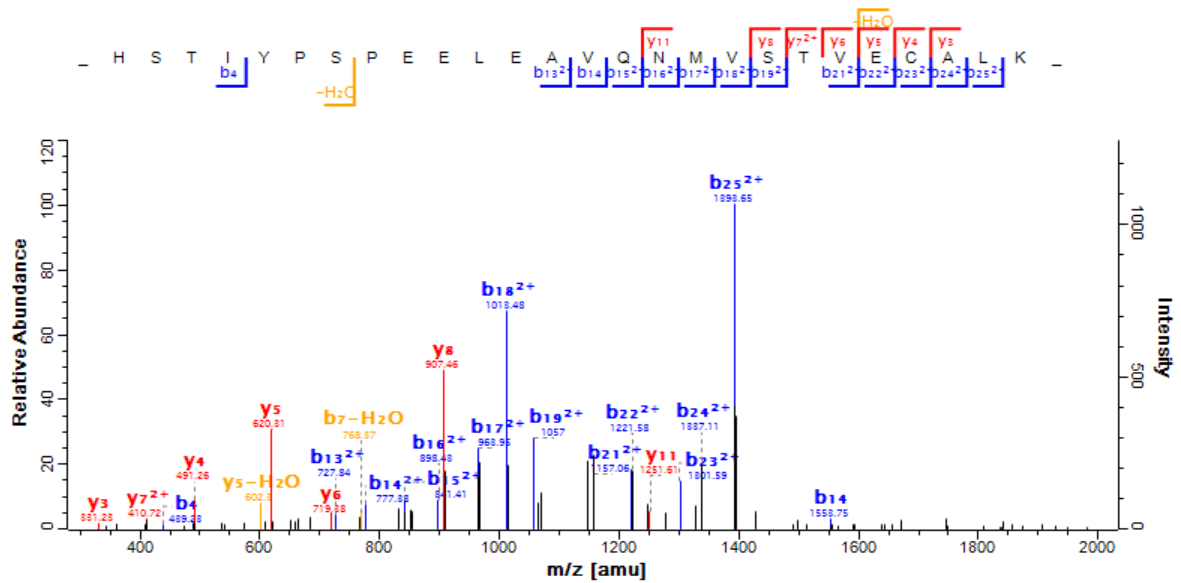

**Protein Group ID:** 2980  
**Protein Accession Numbers:** Q99828  
**Gene Names:** CIB1  
**Peptide Sequence:** AQVPFEQILSLPELK  
**Total Number of Spectra:** 6  
**Number of Replicates (out of 10):** 6  
**Best Match Score:** 115.38  
**Best Match Posterior Error Probability:** 5.43E-05  
**Best Match Spectrum:**

**Scan number** 5783      **Raw file** OGEWT-Frac4  
**Method** ITMS; CID      **Genenames** CIB1

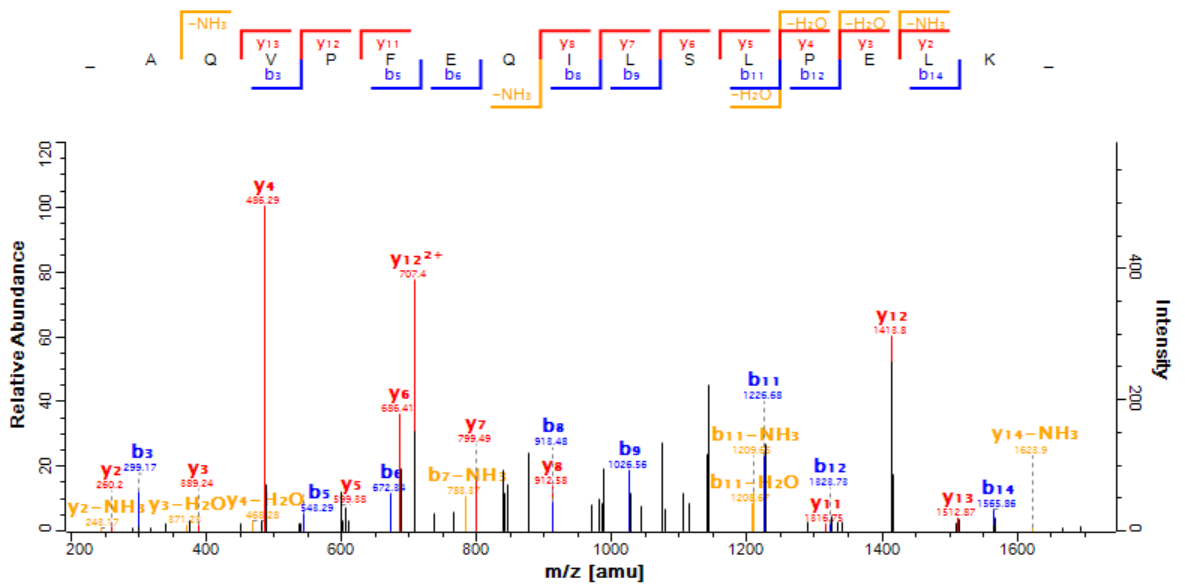

**Protein Group ID:** 2993  
**Protein Accession Numbers:** Q9BQD3  
**Gene Names:** KXD1  
**Peptide Sequence:** ILSMVNTDDVNAILILAK  
**Total Number of Spectra:** 1  
**Number of Replicates (out of 10):** 1  
**Best Match Score:** 100.77  
**Best Match Posterior Error Probability:** 0.00022686  
**Best Match Spectrum:**

**Scan number** 5466      **Raw file** Prt-OGE-Batch3-Mock-Frac4  
**Method** ITMS; CID      **Genenames** KXD1

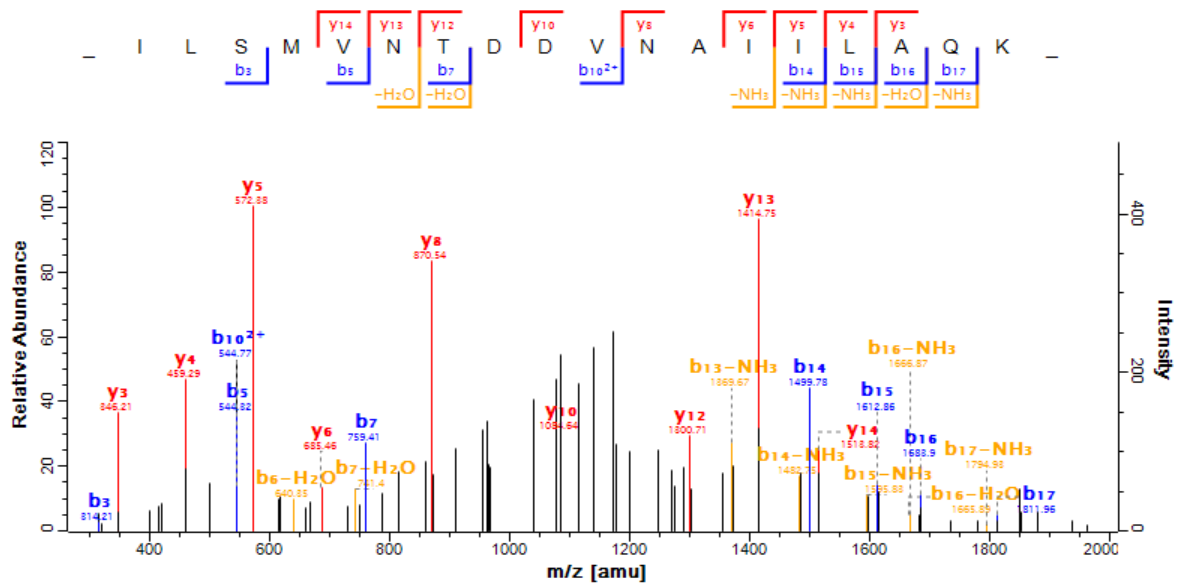



**Protein Group ID:** 3007  
**Protein Accession Numbers:** Q9BRQ8  
**Gene Names:** AIFM2  
**Peptide Sequence:** FNEVSSSQAAIQAYEDMVR  
**Total Number of Spectra:** 1  
**Number of Replicates (out of 10):** 1  
**Best Match Score:** 112.58  
**Best Match Posterior Error Probability:** 3.43E-05  
**Best Match Spectrum:**

**Scan number** 4706      **Raw file** 20100917-KD-Batch5-Prt-OGE-Mock-Frac21  
**Method** ITMS; CID      **Genenames** AIFM2

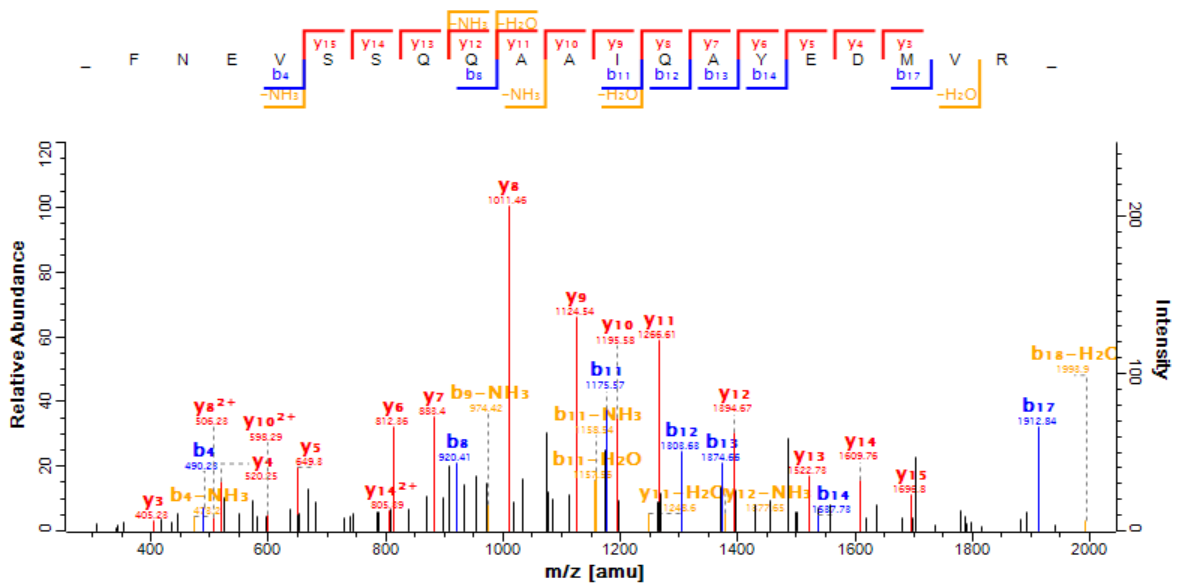

**Protein Group ID:** 3011  
**Protein Accession Numbers:** Q9BS18  
**Gene Names:** ANAPC13  
**Peptide Sequence:** ILDLIDDAWR  
**Total Number of Spectra:** 1  
**Number of Replicates (out of 10):** 1  
**Best Match Score:** 114.89  
**Best Match Posterior Error Probability:** 0.00021656  
**Best Match Spectrum:**

**Scan number** 5518      **Raw file** OGE-Mock-Frac1  
**Method** ITMS; CID      **Genenames** ANAPC13

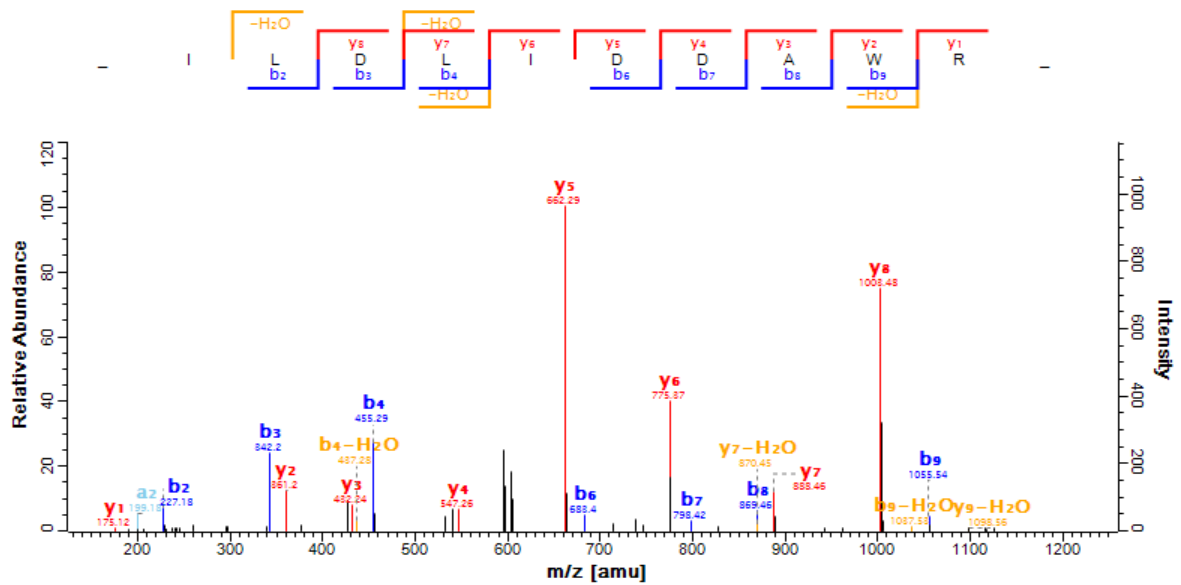

**Protein Group ID:** 3015

**Protein Accession Numbers:** Q9BSE5

**Gene Names:** AGMAT

**Peptide Sequence:** LPVQTSPEGLDAAAFIVIGVPLDTGTSNRPGAR

**Total Number of Spectra:** 2

**Number of Replicates (out of 10):** 2

**Best Match Score:** 78.451

**Best Match Posterior Error Probability:** 9.07E-07

**Best Match Spectrum:**

|                    |           |                  |                             |
|--------------------|-----------|------------------|-----------------------------|
| <b>Scan number</b> | 6191      | <b>Raw file</b>  | Prt-OGE-Batch3--Mock-Frac13 |
| <b>Method</b>      | ITMS; CID | <b>Genenames</b> | AGMAT                       |

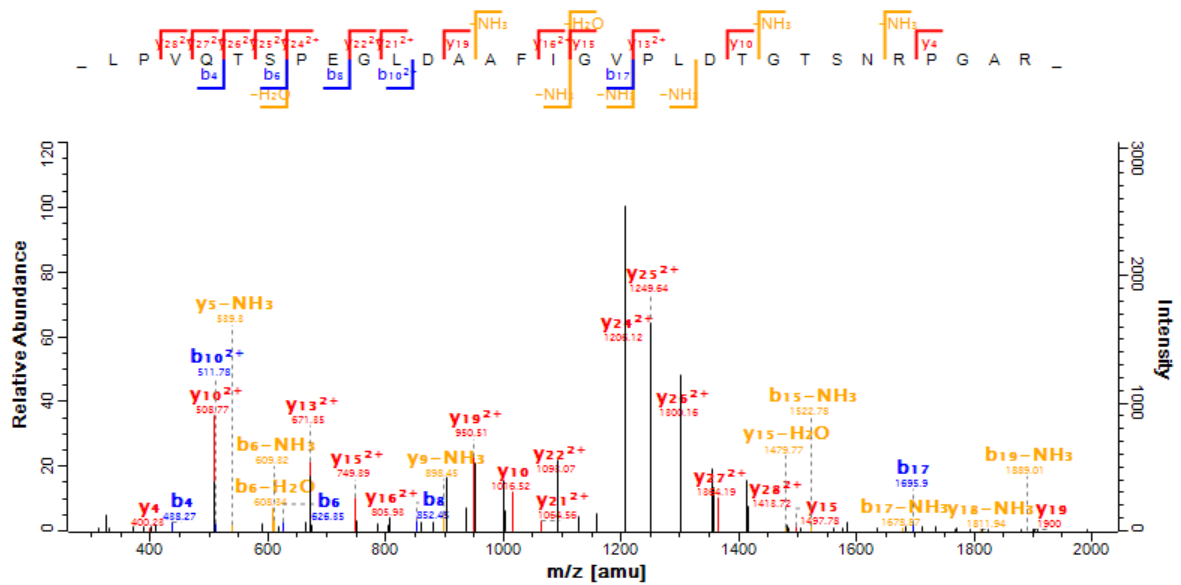

**Protein Group ID:** 3022

**Protein Accession Numbers:** Q9BTA9; Q9BTA9-2; Q9BTA9-5

**Gene Names:** WAC

**Peptide Sequence:** QGPVQSATQQPVTK

**Total Number of Spectra:** 2

**Number of Replicates (out of 10):** 1

**Best Match Score:** 122.1

**Best Match Posterior Error Probability:** 0.00010766

**Best Match Spectrum:**

**Scan number** 1263      **Raw file** 20100930-KD-Batch5-Prt-OGE-WT-Frac20  
**Method** ITMS; CID      **Genenames** WAC

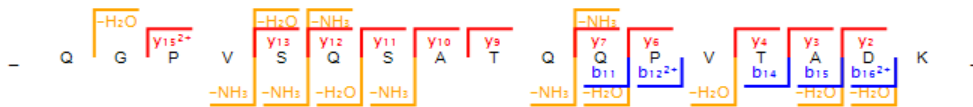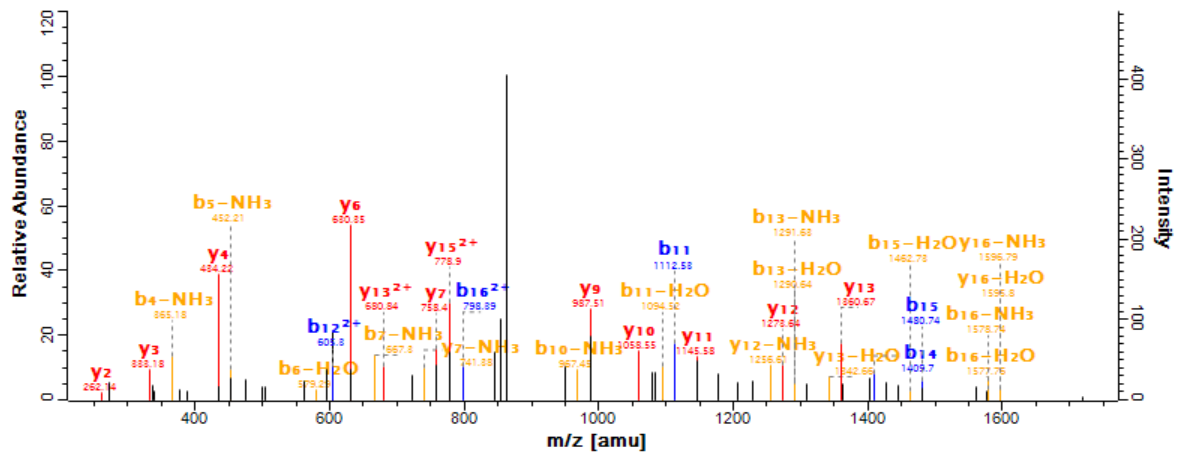

**Protein Group ID:** 3024  
**Protein Accession Numbers:** Q9BTL3  
**Gene Names:** FAM103A1  
**Peptide Sequence:** FTENDKEYQEYLK  
**Total Number of Spectra:** 1  
**Number of Replicates (out of 10):** 1  
**Best Match Score:** 126.12  
**Best Match Posterior Error Probability:** 0.00024041  
**Best Match Spectrum:**

**Scan number** 2627      **Raw file** OGE-Mock-Frac19  
**Method** ITMS; CID      **Genenames** FAM103A1

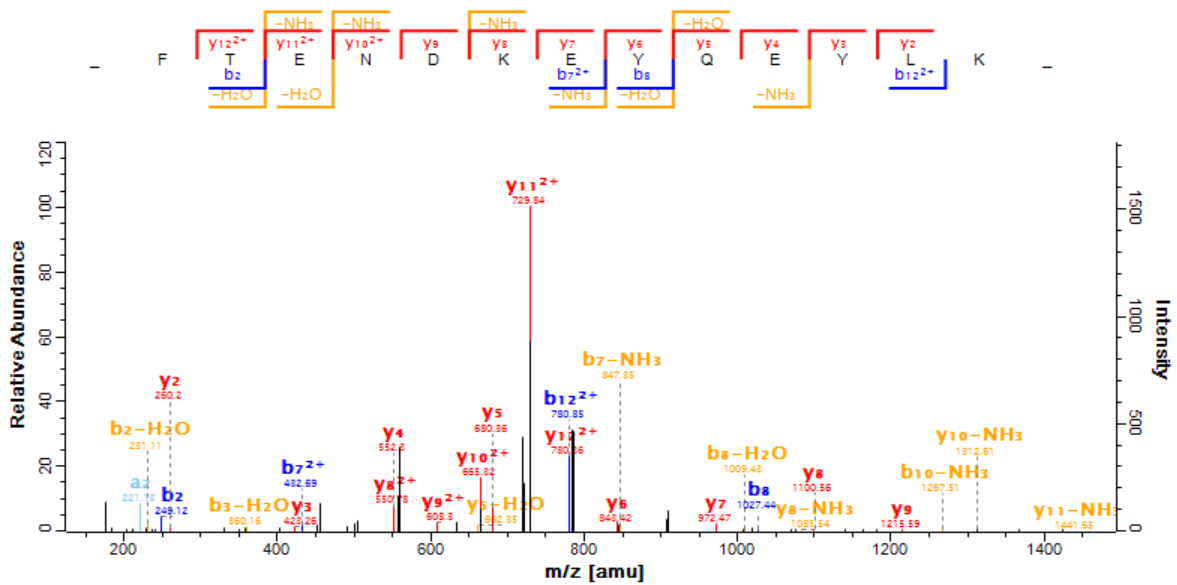

**Protein Group ID:** 3026  
**Protein Accession Numbers:** Q9BTV4  
**Gene Names:** TMEM43  
**Peptide Sequence:** LVHIIGALR  
**Total Number of Spectra:** 1  
**Number of Replicates (out of 10):** 1  
**Best Match Score:** 98.523  
**Best Match Posterior Error Probability:** 0.00086929  
**Best Match Spectrum:**

**Scan number** 2364      **Raw file** Prt-OGE-Batch3-WT-Frac1  
**Method** ITMS; CID      **Genenames** TMEM43

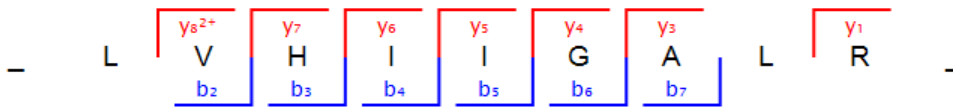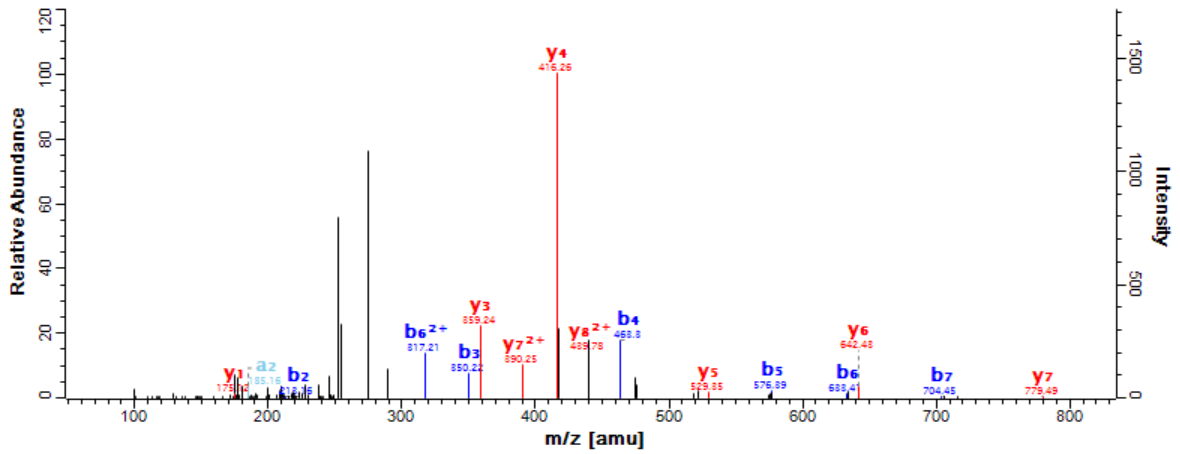

**Protein Group ID:** 3039  
**Protein Accession Numbers:** Q9BUT9  
**Gene Names:** FAM195A  
**Peptide Sequence:** LQNFVPIDLD EEWAWAQQLAR  
**Total Number of Spectra:** 2  
**Number of Replicates (out of 10):** 2  
**Best Match Score:** 79.514  
**Best Match Posterior Error Probability:** 0.0010223  
**Best Match Spectrum:**

|                    |           |                  |                            |
|--------------------|-----------|------------------|----------------------------|
| <b>Scan number</b> | 8138      | <b>Raw file</b>  | Prt-OGE-Batch2-Mock-Frac20 |
| <b>Method</b>      | ITMS; CID | <b>Genenames</b> | FAM195A                    |

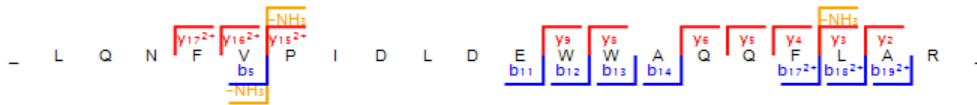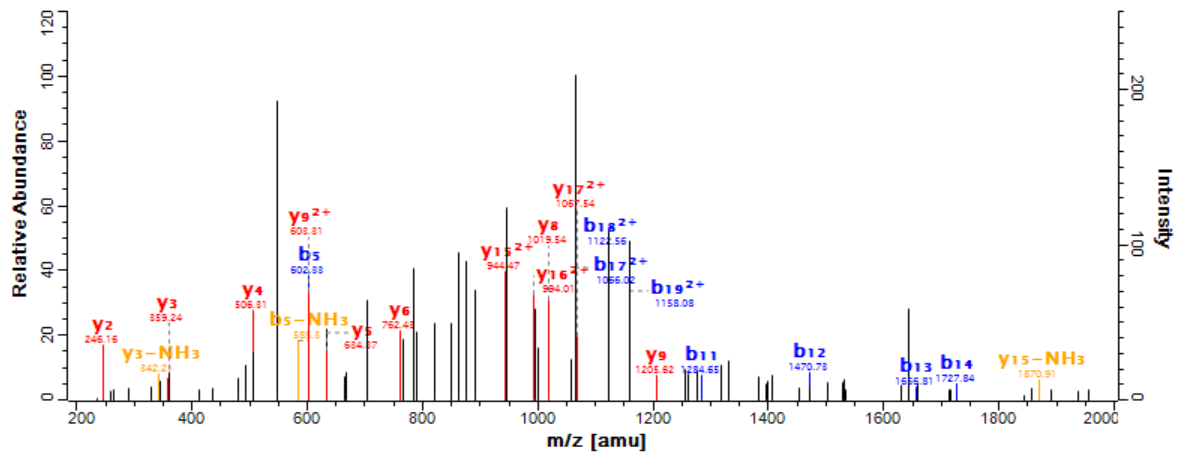

**Protein Group ID:** 3041  
**Protein Accession Numbers:** Q9BV19  
**Gene Names:** C1orf50  
**Peptide Sequence:** LTVIAEQIQLQEQR  
**Total Number of Spectra:** 1  
**Number of Replicates (out of 10):** 1  
**Best Match Score:** 105.03  
**Best Match Posterior Error Probability:** 0.00015953  
**Best Match Spectrum:**

**Scan number** 4789      **Raw file** Prt-OGE-Batch3-Mock-Frac9  
**Method** ITMS; CID      **Genenames** C1orf50

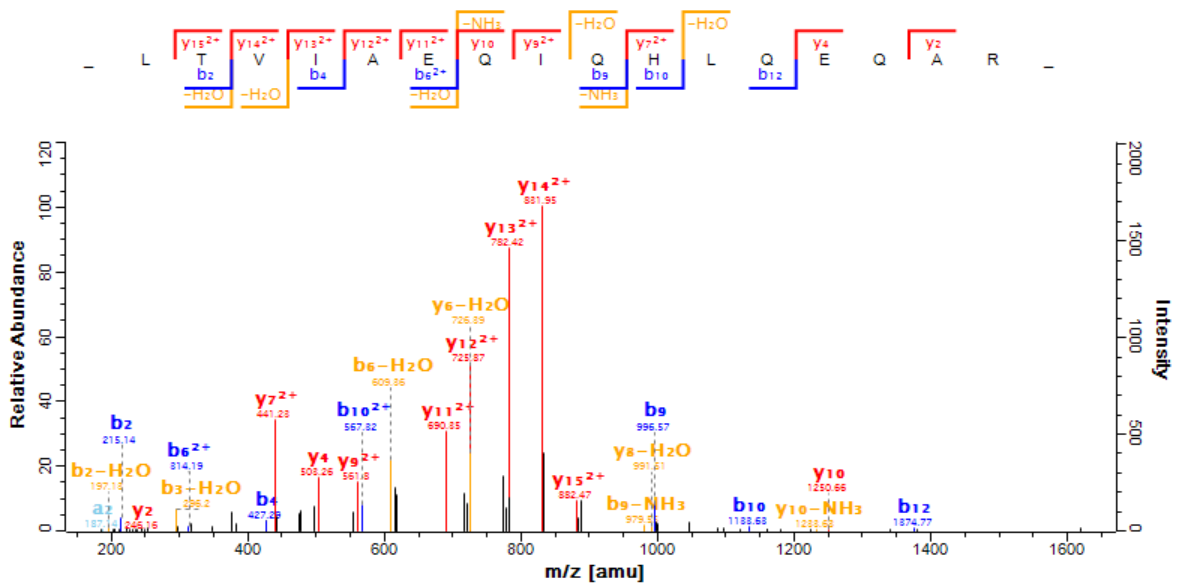



**Protein Group ID:** 3046  
**Protein Accession Numbers:** Q9BVC6  
**Gene Names:** TMEM109  
**Peptide Sequence:** EAPVDVLTQIGR  
**Total Number of Spectra:** 1  
**Number of Replicates (out of 10):** 1  
**Best Match Score:** 112.51  
**Best Match Posterior Error Probability:** 0.00019939  
**Best Match Spectrum:**

**Scan number** 3514      **Raw file** Prt-OGE-Batch3-WT-Frac1  
**Method** ITMS; CID      **Genenames** TMEM109

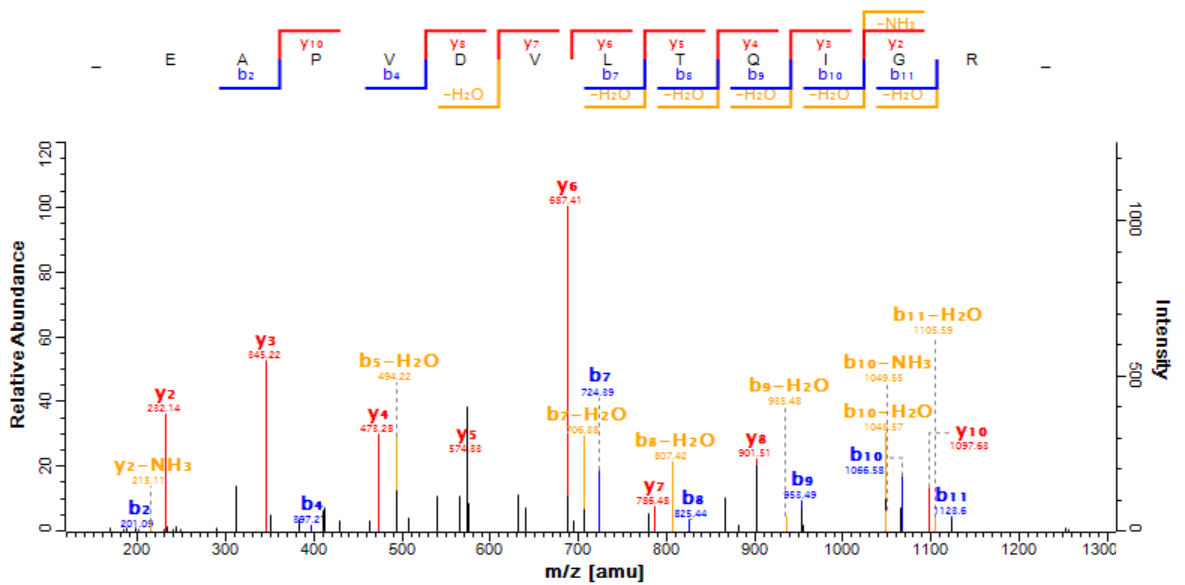

**Protein Group ID:** 3051  
**Protein Accession Numbers:** Q9BVM4  
**Gene Names:** A2LD1  
**Peptide Sequence:** ALVFVYGTK  
**Total Number of Spectra:** 4  
**Number of Replicates (out of 10):** 4  
**Best Match Score:** 116.52  
**Best Match Posterior Error Probability:** 0.00016993  
**Best Match Spectrum:**

**Scan number** 6653      **Raw file** 20100917-KD-Batch5-Prt-OGE-Mock-Frac15  
**Method** ITMS; CID      **Genenames** A2LD1

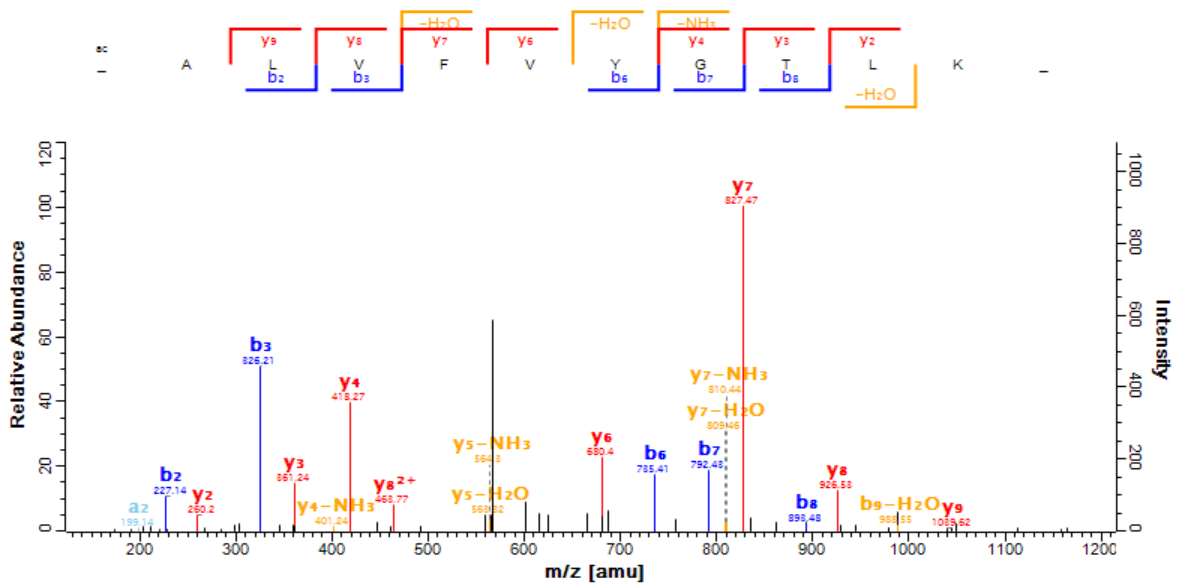

**Protein Group ID:** 3064  
**Protein Accession Numbers:** Q9BXY0  
**Gene Names:** MAK16  
**Peptide Sequence:** ALIAAQLDNAIEKELELER  
**Total Number of Spectra:** 1  
**Number of Replicates (out of 10):** 1  
**Best Match Score:** 89.358  
**Best Match Posterior Error Probability:** 0.0015855  
**Best Match Spectrum:**

**Scan number** 4964      **Raw file** Prt-OGE-Batch3-WT-Frac17  
**Method** ITMS; CID      **Genenames** MAK16

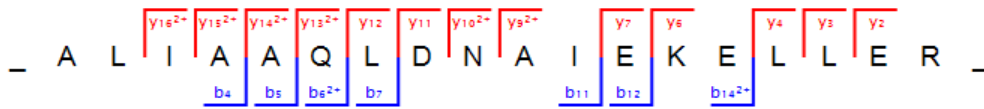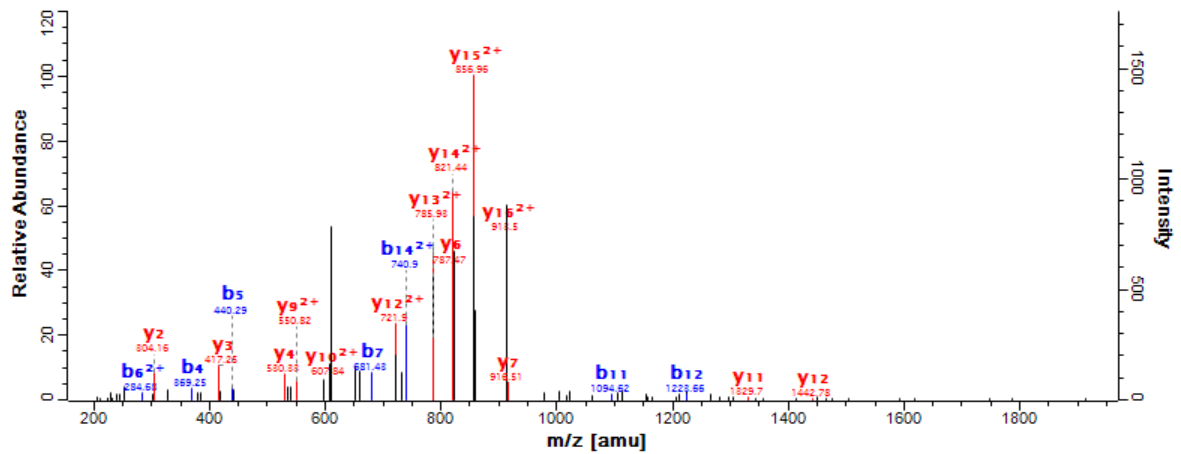

**Protein Group ID:** 3075  
**Protein Accession Numbers:** Q9BYR6  
**Gene Names:** KRTAP3-3  
**Peptide Sequence:** GCSVPTGPATTICSSDK  
**Total Number of Spectra:** 2  
**Number of Replicates (out of 10):** 2  
**Best Match Score:** 120.63  
**Best Match Posterior Error Probability:** 0.0001227  
**Best Match Spectrum:**

**Scan number** 2011      **Raw file** 20100930-KD-Batch5-Prt-OGE-WT-Frac2  
**Method** ITMS; CID      **Genenames** KRTAP3-3

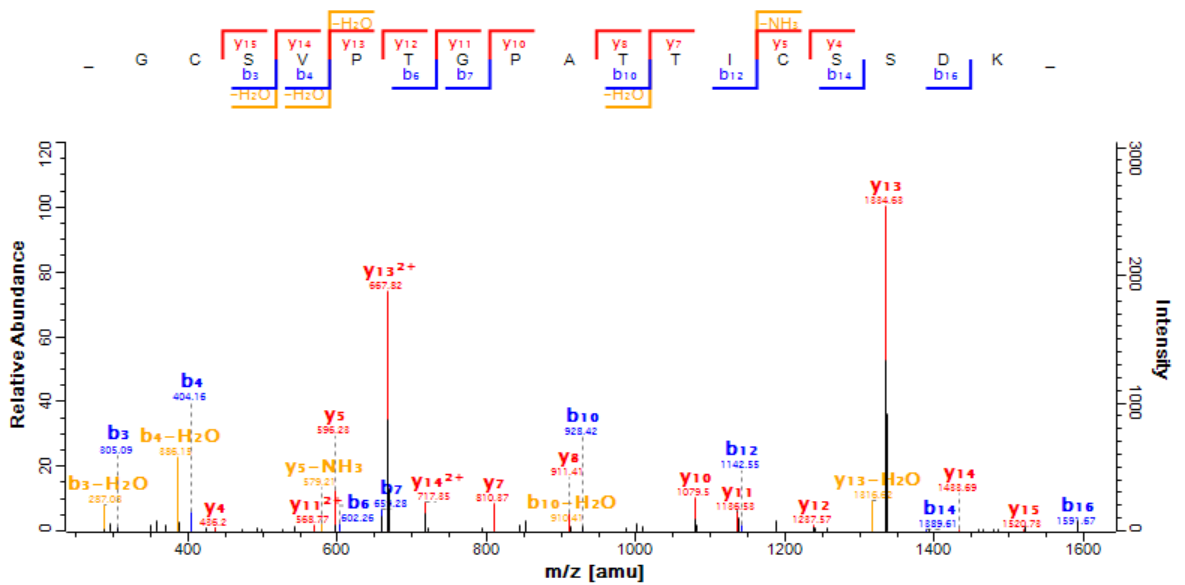

**Protein Group ID:** 3076  
**Protein Accession Numbers:** Q9BYR7  
**Gene Names:** KRTAP3-2  
**Peptide Sequence:** SCSVPTGPATTICSSDK  
**Total Number of Spectra:** 2  
**Number of Replicates (out of 10):** 2  
**Best Match Score:** 101.01  
**Best Match Posterior Error Probability:** 0.00024543  
**Best Match Spectrum:**

**Scan number** 2010      **Raw file** 20100930-KD-Batch5-Prt-OGE-WT-Frac2  
**Method** ITMS; CID      **Genenames** KRTAP3-2

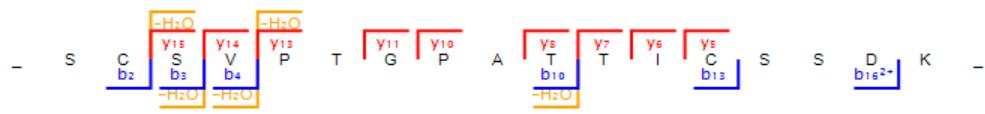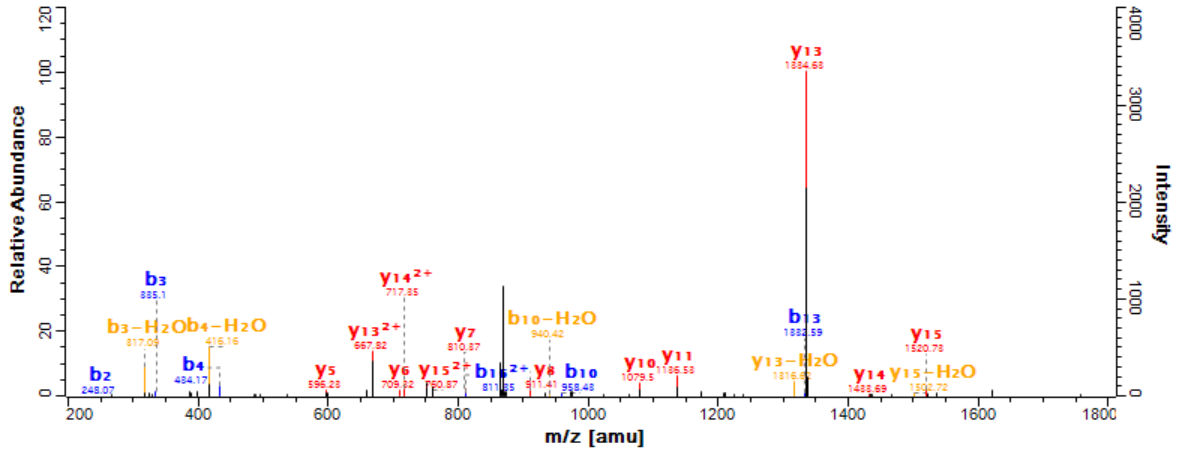

**Protein Group ID:** 3081  
**Protein Accession Numbers:** Q9BZH6  
**Gene Names:** WDR11  
**Peptide Sequence:** DLLNELESPK  
**Total Number of Spectra:** 3  
**Number of Replicates (out of 10):** 2  
**Best Match Score:** 98.048  
**Best Match Posterior Error Probability:** 0.0069027  
**Best Match Spectrum:**

**Scan number** 3348      **Raw file** Prt-OGE-Batch2-Mock-Frac6  
**Method** ITMS; CID      **Genenames** WDR11

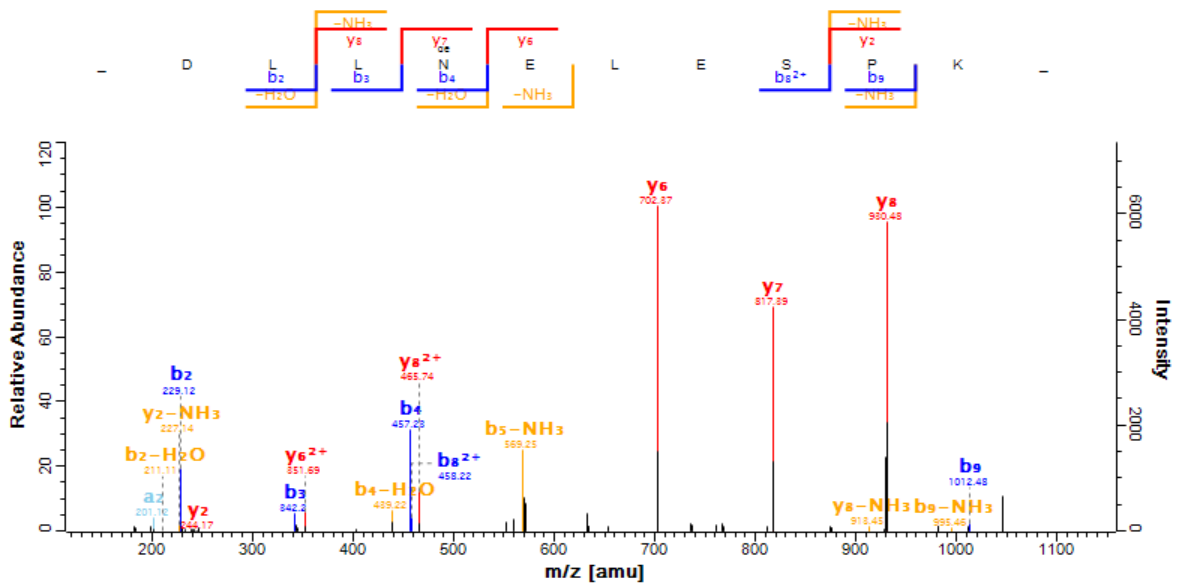

**Protein Group ID:** 3090  
**Protein Accession Numbers:** Q9C0F1-2; Q9C0F1  
**Gene Names:** CEP44  
**Peptide Sequence:** VMVDENTWTNLLSR  
**Total Number of Spectra:** 1  
**Number of Replicates (out of 10):** 1  
**Best Match Score:** 98.676  
**Best Match Posterior Error Probability:** 0.00037458  
**Best Match Spectrum:**

**Scan number** 5105      **Raw file** 20100917-KD-Batch5-Prt-OGE-Mock-Frac7  
**Method** ITMS; CID      **Genenames** CEP44

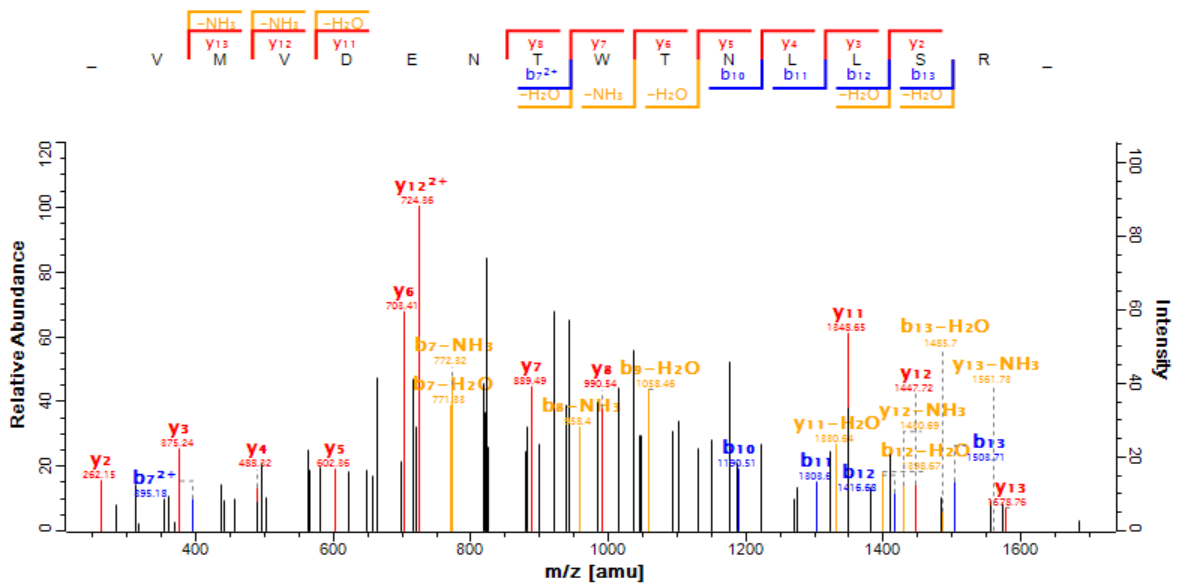

**Protein Group ID:** 3097  
**Protein Accession Numbers:** Q9GZT4  
**Gene Names:** SRR  
**Peptide Sequence:** DLVDDIFTVTEDEIK  
**Total Number of Spectra:** 2  
**Number of Replicates (out of 10):** 2  
**Best Match Score:** 165.34  
**Best Match Posterior Error Probability:** 1.63E-11  
**Best Match Spectrum:**

**Scan number** 7052      **Raw file** 20100917-KD-Batch5-Prt-OGE-Mock-Frac13  
**Method** ITMS; CID      **Genenames** SRR

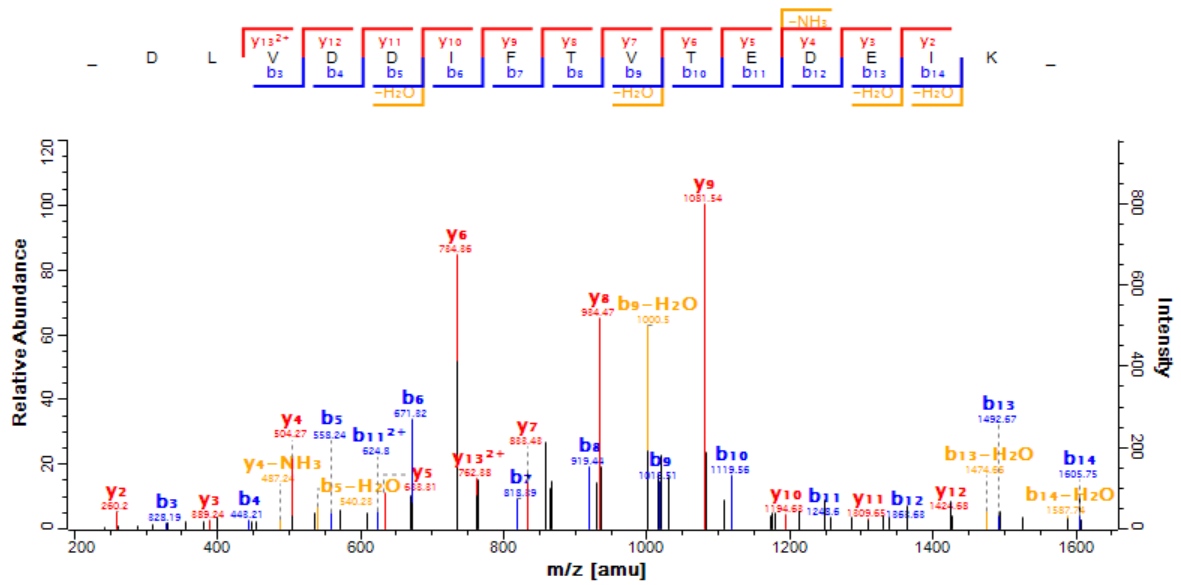



**Protein Group ID:** 3102  
**Protein Accession Numbers:** Q9H009  
**Gene Names:** NACA2  
**Peptide Sequence:** IQDLSQQAQLAAAEK  
**Total Number of Spectra:** 5  
**Number of Replicates (out of 10):** 3  
**Best Match Score:** 305.29  
**Best Match Posterior Error Probability:** 3.64E-186  
**Best Match Spectrum:**

**Scan number** 3164      **Raw file** Prt-OGE-Batch3-Mock-Frac6  
**Method** ITMS; CID      **Genenames** NACA2

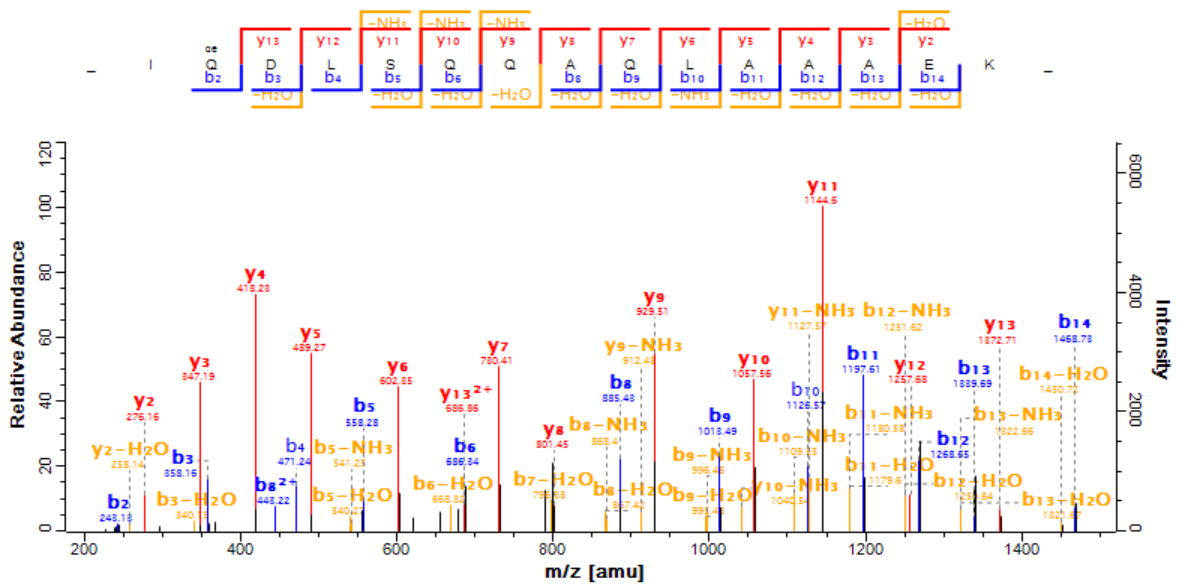

**Protein Group ID:** 3106  
**Protein Accession Numbers:** Q9H0F7  
**Gene Names:** ARL6  
**Peptide Sequence:** GEGLQEGVDWLQDQIQTVK  
**Total Number of Spectra:** 2  
**Number of Replicates (out of 10):** 2  
**Best Match Score:** 126.25  
**Best Match Posterior Error Probability:** 1.22E-05  
**Best Match Spectrum:**

**Scan number** 5826      **Raw file** 20100917-KD-Batch5-Prt-OGE-Mock-Frac20  
**Method** ITMS; CID      **Genenames** ARL6

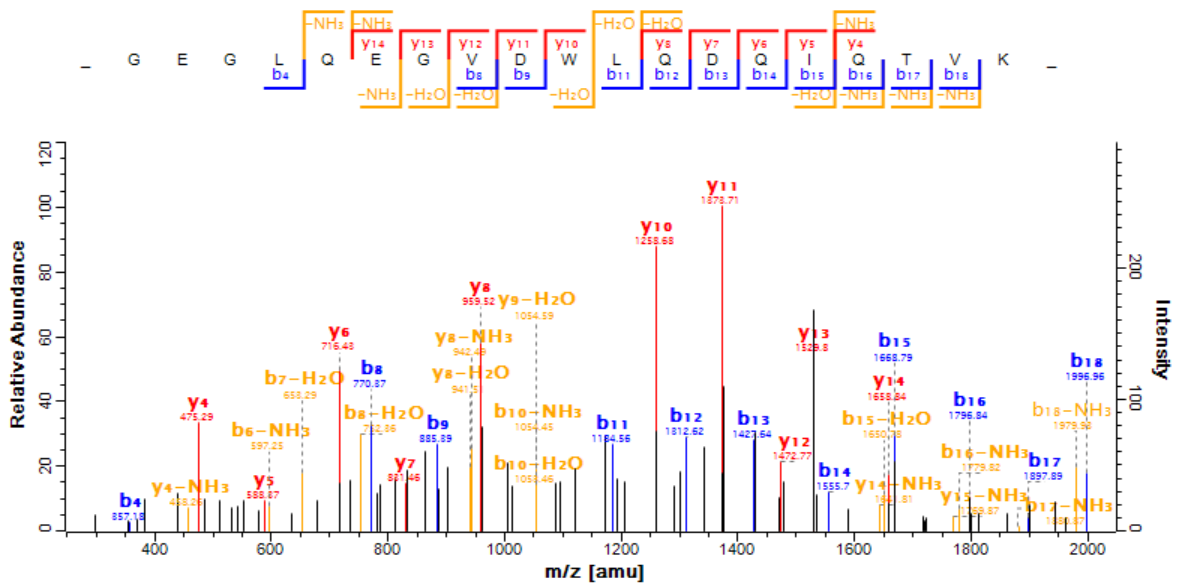

**Protein Group ID:** 3108

**Protein Accession Numbers:** Q9H0L4

**Gene Names:** CSTF2T

**Peptide Sequence:** SVFVGNIPYEATEEQLKDI FSEVGSVVSVFR

**Total Number of Spectra:** 3

**Number of Replicates (out of 10):** 3

**Best Match Score:** 74.274

**Best Match Posterior Error Probability:** 6.46E-06

**Best Match Spectrum:**

|                    |           |                  |                                      |
|--------------------|-----------|------------------|--------------------------------------|
| <b>Scan number</b> | 8429      | <b>Raw file</b>  | 20100927-KD-Batch4-Prt-OGE-WT-Frac15 |
| <b>Method</b>      | ITMS; CID | <b>Genenames</b> | CSTF2T                               |

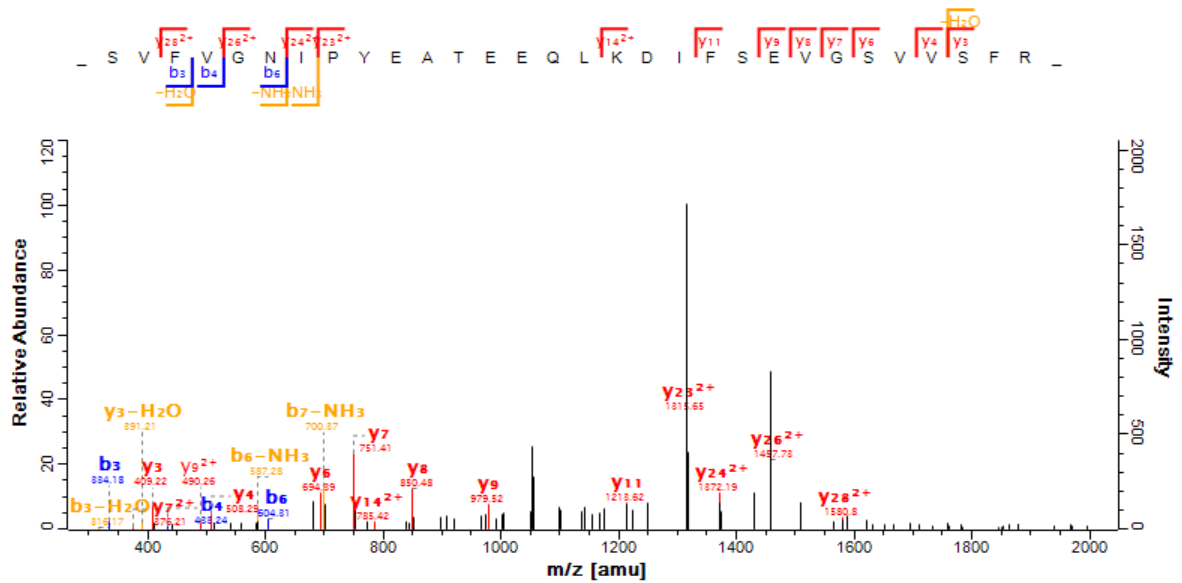

**Protein Group ID:** 3118

**Protein Accession Numbers:** Q9H2A2; Q9H2A2-4; Q9H2A2-2

**Gene Names:** ALDH8A1

**Peptide Sequence:** LSLELGGK

**Total Number of Spectra:** 7

**Number of Replicates (out of 10):** 6

**Best Match Score:** 127.84

**Best Match Posterior Error Probability:** 0.0015856

**Best Match Spectrum:**

|                    |           |                  |               |
|--------------------|-----------|------------------|---------------|
| <b>Scan number</b> | 2558      | <b>Raw file</b>  | OGE-WT-Frac15 |
| <b>Method</b>      | ITMS; CID | <b>Genenames</b> | ALDH8A1       |

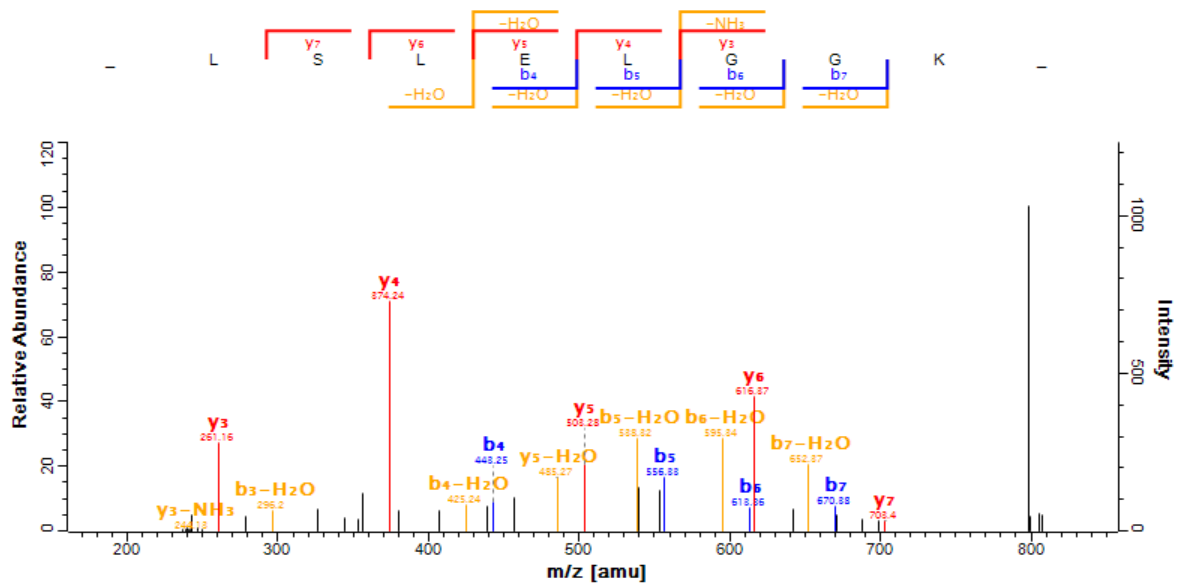

**Protein Group ID:** 3119  
**Protein Accession Numbers:** Q9H2C0  
**Gene Names:** GAN  
**Peptide Sequence:** LNEDTIQDVVQAADLLLLTDLK  
**Total Number of Spectra:** 2  
**Number of Replicates (out of 10):** 2  
**Best Match Score:** 98.443  
**Best Match Posterior Error Probability:** 7.37E-06  
**Best Match Spectrum:**

**Scan number** 8115      **Raw file** OGE-Mock-Frac10  
**Method** ITMS; CID      **Genenames** GAN

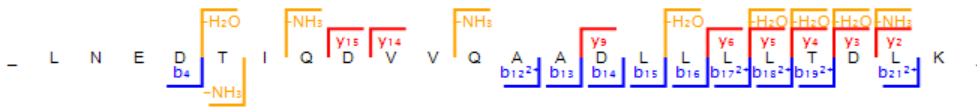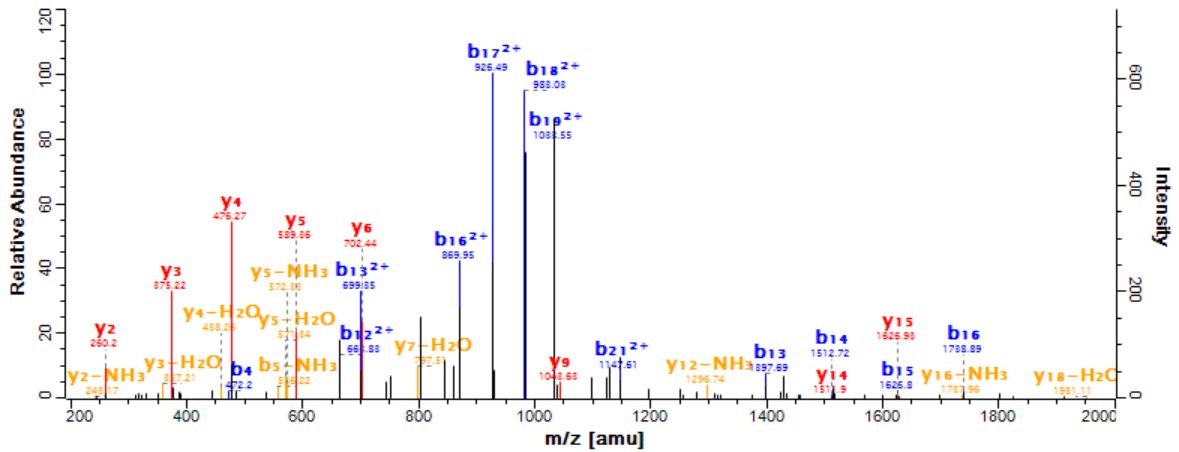

**Protein Group ID:** 3123

**Protein Accession Numbers:** Q9H2P9-5; Q9H2P9; Q9H2P9-4; Q9H2P9-6; Q9H2P9-2; Q9H2P9-3

**Gene Names:** DPH5

**Peptide Sequence:** YMSVNQAAQQLLEIVQNQR

**Total Number of Spectra:** 7

**Number of Replicates (out of 10):** 7

**Best Match Score:** 169.94

**Best Match Posterior Error Probability:** 8.10E-17

**Best Match Spectrum:**

|                    |           |                  |                                     |
|--------------------|-----------|------------------|-------------------------------------|
| <b>Scan number</b> | 7370      | <b>Raw file</b>  | 20100930-KD-Batch5-Prt-OGE-WT-Frac8 |
| <b>Method</b>      | ITMS; CID | <b>Genenames</b> | DPH5                                |

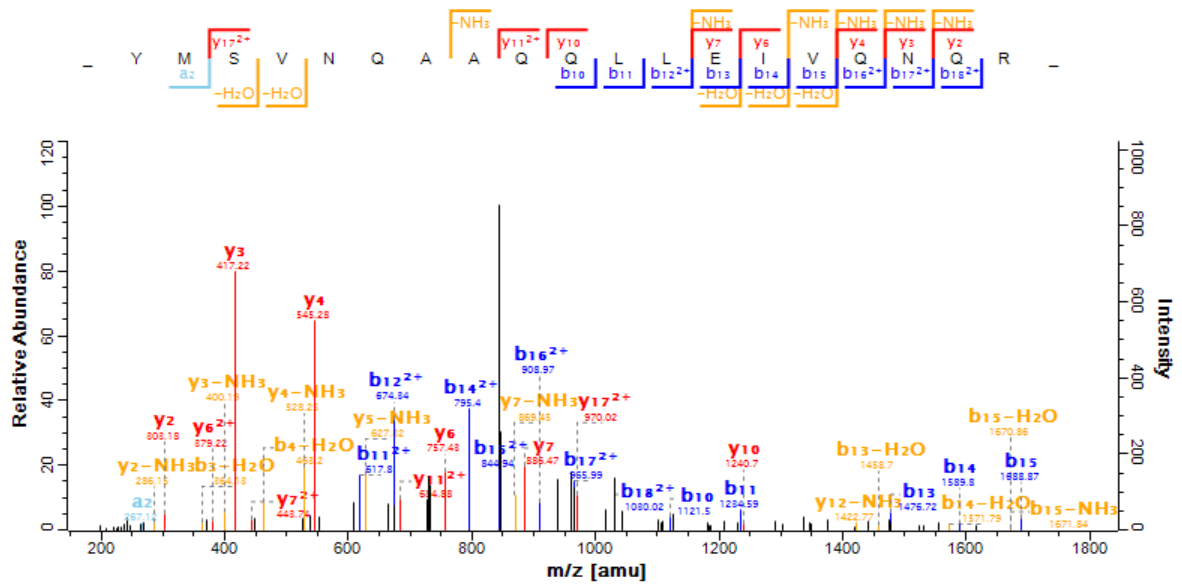

**Protein Group ID:** 3126

**Protein Accession Numbers:** Q9H361; H3BNY3; H3BPI5

**Gene Names:** PABPC3

**Peptide Sequence:** SGVGNIFVK

**Total Number of Spectra:** 1

**Number of Replicates (out of 10):** 1

**Best Match Score:** 98.033

**Best Match Posterior Error Probability:** 0.00088997

**Best Match Spectrum:**

**Scan number** 2441      **Raw file** 20100927-KD-Batch4-Prt-OGE-WT-Frac20  
**Method** ITMS; CID      **Genenames** PABPC3

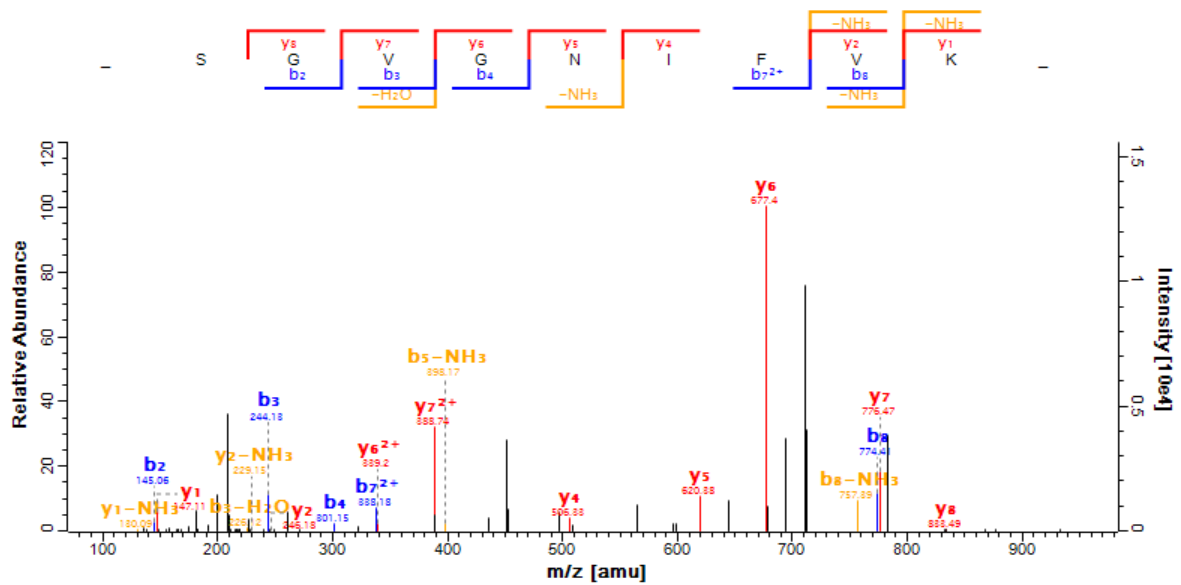

**Protein Group ID:** 3132  
**Protein Accession Numbers:** Q9H3Y8; Q9H3Y8-2  
**Gene Names:** PDPDF  
**Peptide Sequence:** AAIPSSGSLVATHDYR  
**Total Number of Spectra:** 2  
**Number of Replicates (out of 10):** 2  
**Best Match Score:** 105.53  
**Best Match Posterior Error Probability:** 0.00017756  
**Best Match Spectrum:**

**Scan number** 3382      **Raw file** Prt-OGE-Batch3-Mock-Frac16  
**Method** ITMS; CID      **Genenames** PDPDF

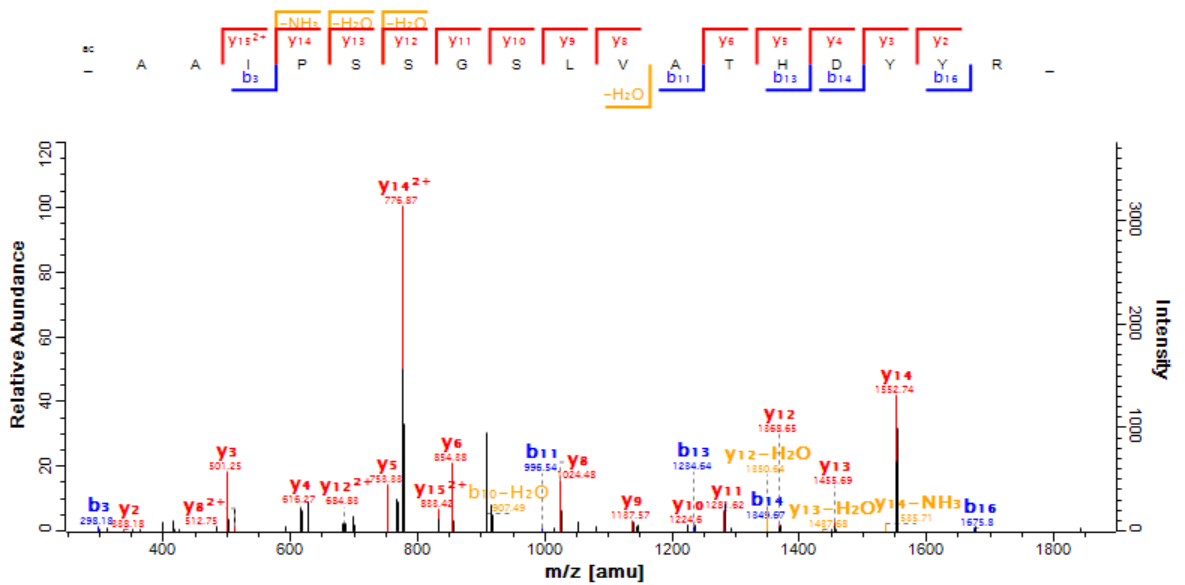



**Protein Group ID:** 3135  
**Protein Accession Numbers:** Q9H479  
**Gene Names:** FN3K  
**Peptide Sequence:** AYDTDAGPVFVK  
**Total Number of Spectra:** 1  
**Number of Replicates (out of 10):** 1  
**Best Match Score:** 138.99  
**Best Match Posterior Error Probability:** 7.49E-05  
**Best Match Spectrum:**

**Scan number** 2480      **Raw file** 20100927-KD-Batch4-Prt-OGE-WT-Frac17  
**Method** ITMS; CID      **Genenames** FN3K

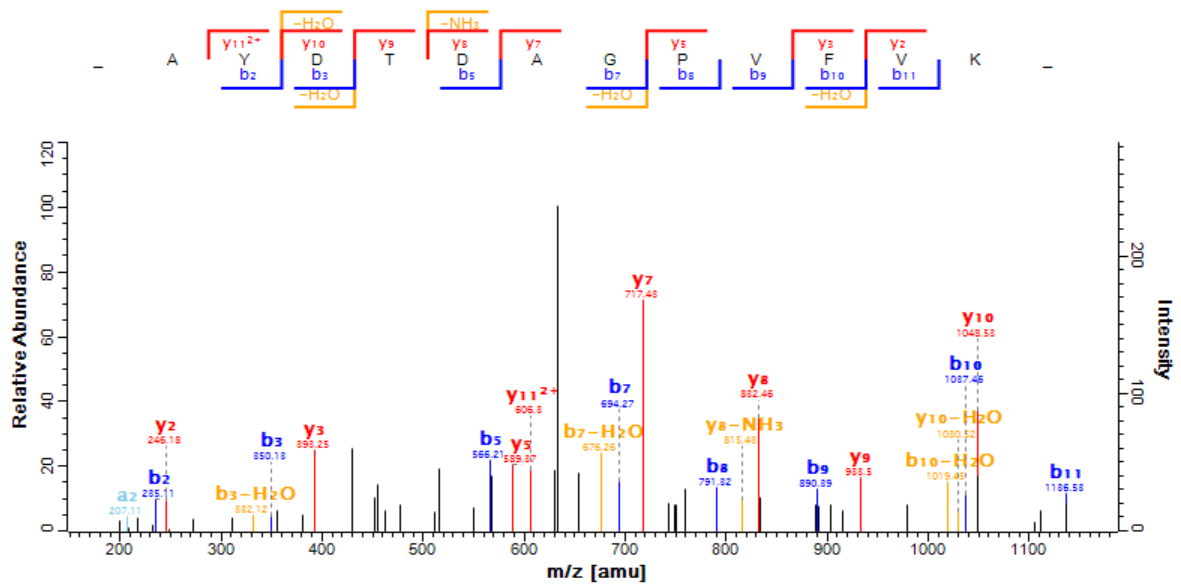

**Protein Group ID:** 3147  
**Protein Accession Numbers:** Q9H6Y2  
**Gene Names:** WDR55  
**Peptide Sequence:** AIHVLDVEQGQLER  
**Total Number of Spectra:** 1  
**Number of Replicates (out of 10):** 1  
**Best Match Score:** 92.039  
**Best Match Posterior Error Probability:** 0.00059034  
**Best Match Spectrum:**

|                    |           |                  |                            |
|--------------------|-----------|------------------|----------------------------|
| <b>Scan number</b> | 3294      | <b>Raw file</b>  | Prt-OGE-Batch3--Mock-Frac4 |
| <b>Method</b>      | ITMS; CID | <b>Genenames</b> | WDR55                      |

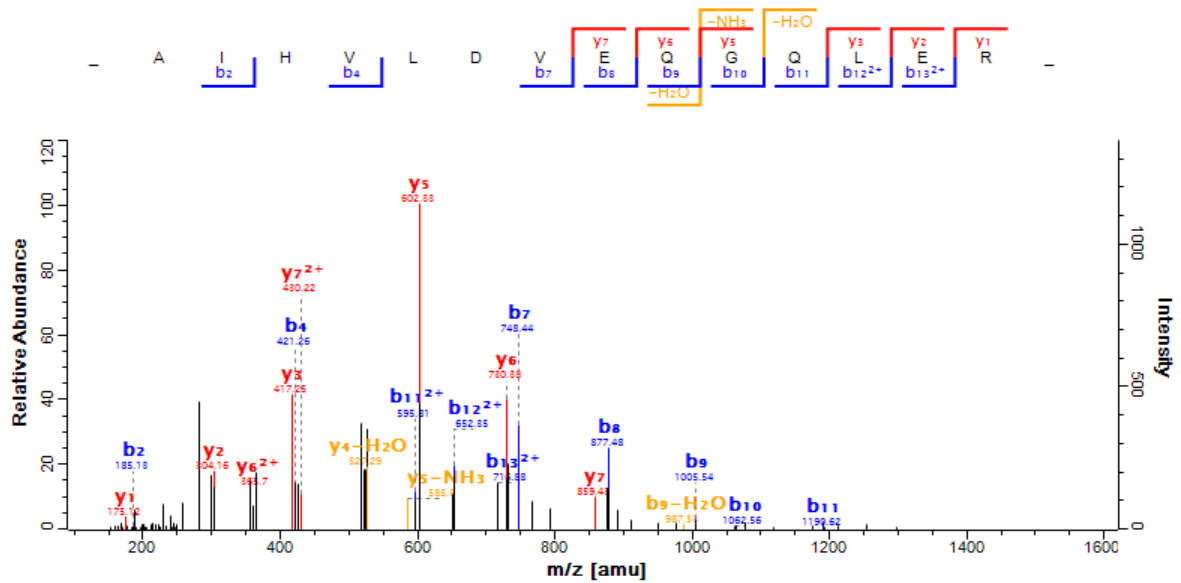

**Protein Group ID:** 3150

**Protein Accession Numbers:** Q9H7E2-3; Q9H7E2; Q9H7E2-2

**Gene Names:** TDRD3

**Peptide Sequence:** PSAPSTLFDLFLESK

**Total Number of Spectra:** 1

**Number of Replicates (out of 10):** 1

**Best Match Score:** 99.991

**Best Match Posterior Error Probability:** 0.00034635

**Best Match Spectrum:**

|                    |           |                  |                                      |
|--------------------|-----------|------------------|--------------------------------------|
| <b>Scan number</b> | 6467      | <b>Raw file</b>  | 20100930-KD-Batch5-Prt-OGE-WT-Frac20 |
| <b>Method</b>      | ITMS; CID | <b>Genenames</b> | TDRD3                                |

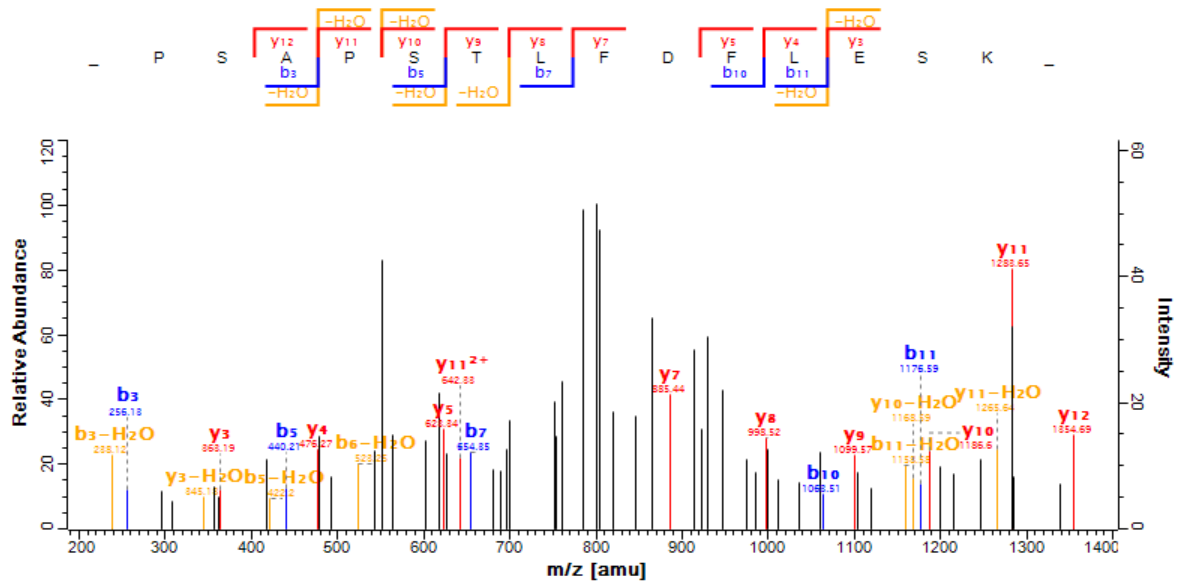

**Protein Group ID:** 3153  
**Protein Accession Numbers:** Q9H814  
**Gene Names:** PHAX  
**Peptide Sequence:** TPGGVFLNLLK  
**Total Number of Spectra:** 6  
**Number of Replicates (out of 10):** 3  
**Best Match Score:** 140.49  
**Best Match Posterior Error Probability:** 1.51E-05  
**Best Match Spectrum:**

**Scan number** 6364      **Raw file** Prt-OGE-Batch2-Mock-Frac14  
**Method** ITMS; CID      **Genenames** PHAX

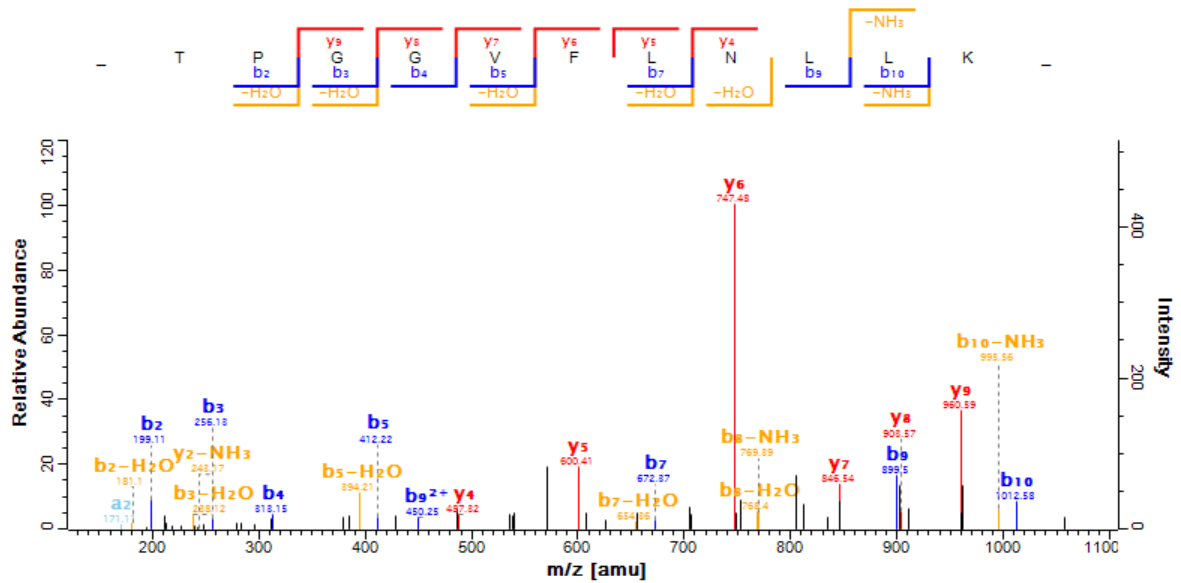

**Protein Group ID:** 3155  
**Protein Accession Numbers:** Q9H840  
**Gene Names:** GEMIN7  
**Peptide Sequence:** MQTPVNIPVPVLR  
**Total Number of Spectra:** 3  
**Number of Replicates (out of 10):** 3  
**Best Match Score:** 142.83  
**Best Match Posterior Error Probability:** 1.45E-05  
**Best Match Spectrum:**

**Scan number** 5020      **Raw file** Prt-OGE-Batch3--Mock-Frac15  
**Method** ITMS; CID      **Genenames** GEMIN7

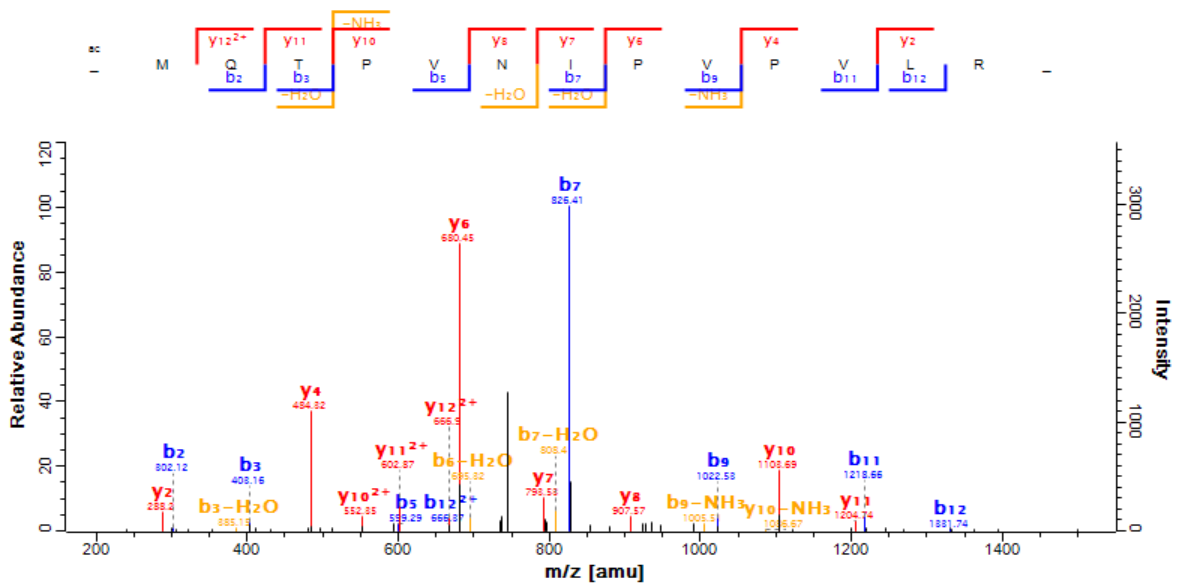

**Protein Group ID:** 3156  
**Protein Accession Numbers:** Q9H8G2; Q9H8G2-2  
**Gene Names:** CAAP1  
**Peptide Sequence:** SVNEILGLAESSNEPK  
**Total Number of Spectra:** 1  
**Number of Replicates (out of 10):** 1  
**Best Match Score:** 109.04  
**Best Match Posterior Error Probability:** 0.00015667  
**Best Match Spectrum:**

**Scan number** 3431      **Raw file** Prt-OGE-Batch3-WT-Frac3  
**Method** ITMS; CID      **Genenames** CAAP1

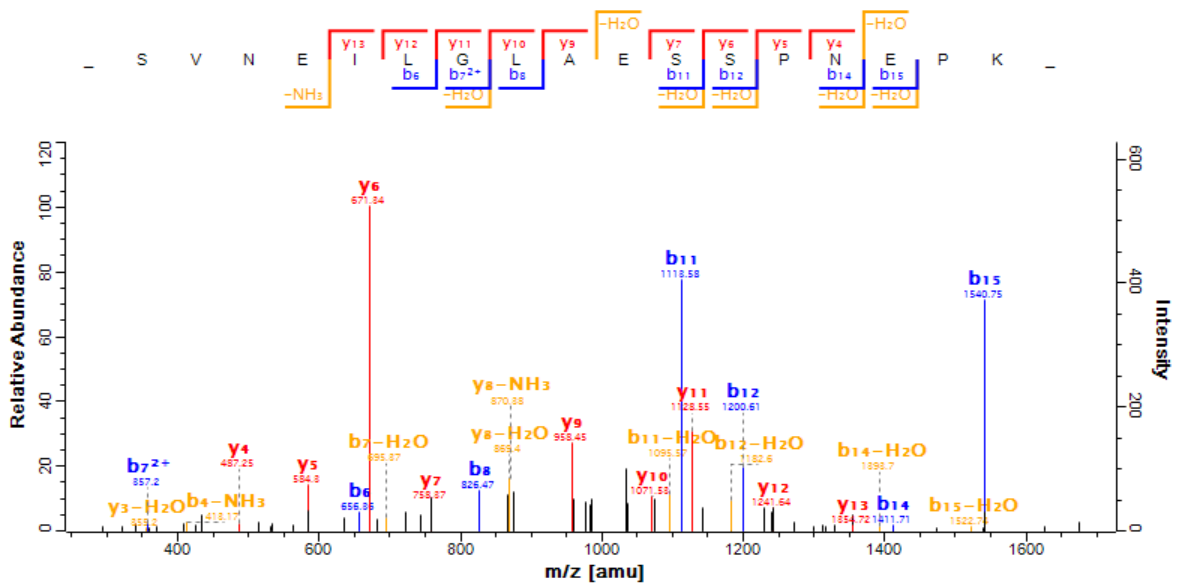

**Protein Group ID:** 3158  
**Protein Accession Numbers:** Q9H900; Q9H900-2  
**Gene Names:** ZWILCH  
**Peptide Sequence:** SAVELVQEFLNDLNK  
**Total Number of Spectra:** 2  
**Number of Replicates (out of 10):** 2  
**Best Match Score:** 89.992  
**Best Match Posterior Error Probability:** 0.00034419  
**Best Match Spectrum:**

**Scan number** 8320      **Raw file** Prt-OGE-Batch2-Mock-Frac12  
**Method** ITMS; CID      **Genenames** ZWILCH

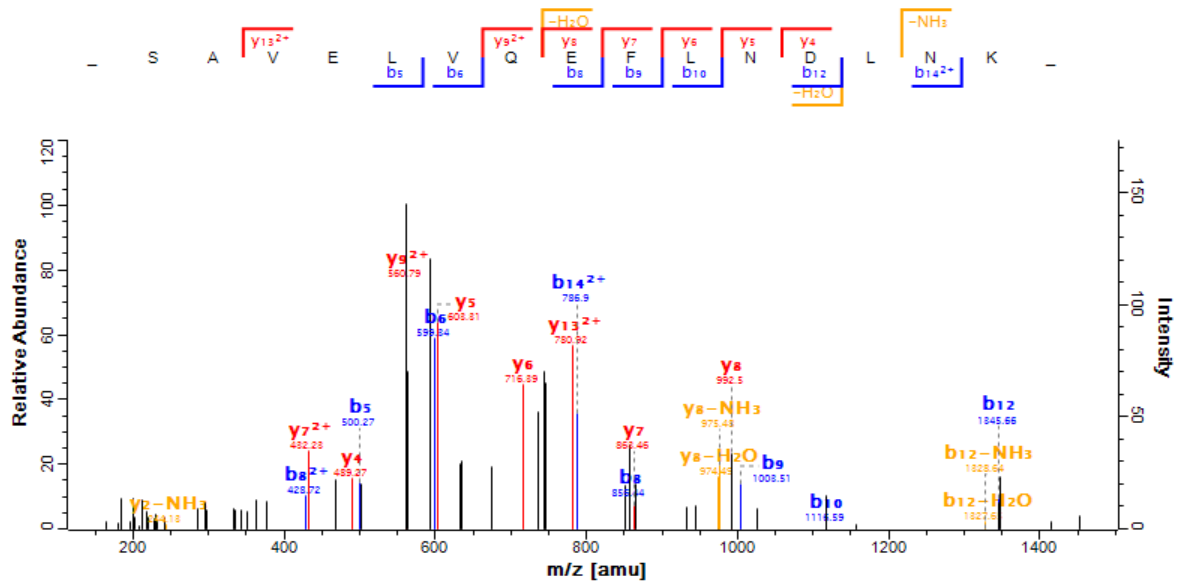

**Protein Group ID:** 3167  
**Protein Accession Numbers:** Q9HAT2; Q9HAT2-2  
**Gene Names:** SIAE  
**Peptide Sequence:** FPFGLVQLSSDLISK  
**Total Number of Spectra:** 4  
**Number of Replicates (out of 10):** 3  
**Best Match Score:** 156.17  
**Best Match Posterior Error Probability:** 2.21E-09  
**Best Match Spectrum:**

**Scan number** 7150      **Raw file** 20100927-KD-Batch4-Prt-OGE-WT-Frac16  
**Method** ITMS; CID      **Genenames** SIAE

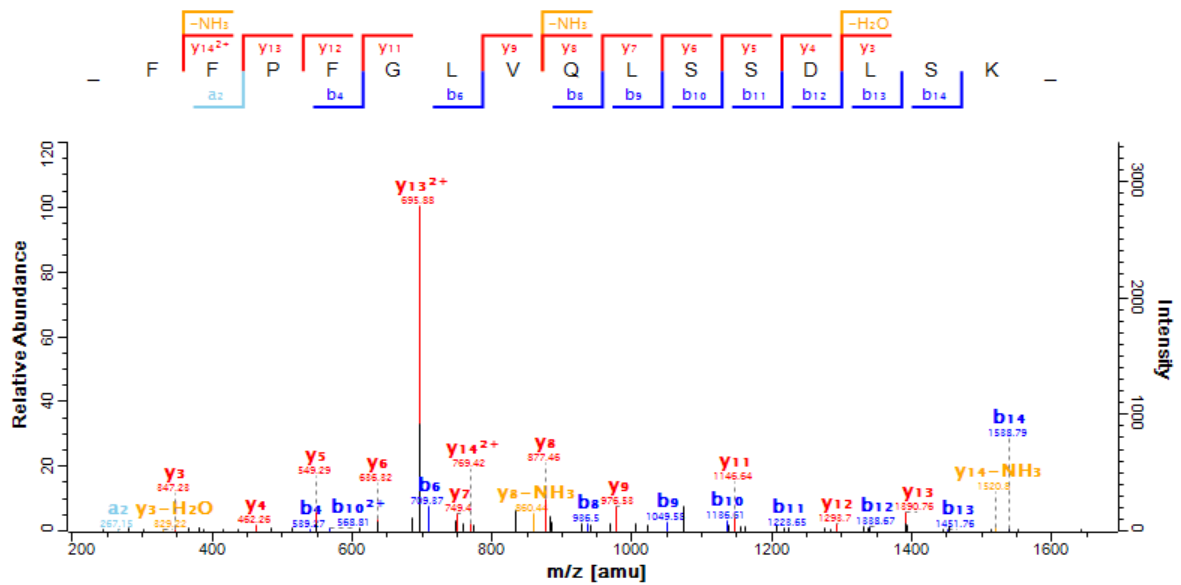



**Protein Group ID:** 3181

**Protein Accession Numbers:** Q9NP74; Q9NP74-2; Q9NP74-3

**Gene Names:** PALMD

**Peptide Sequence:** TGESTVLSSIPLPSDDFK

**Total Number of Spectra:** 2

**Number of Replicates (out of 10):** 2

**Best Match Score:** 109.36

**Best Match Posterior Error Probability:** 0.00012051

**Best Match Spectrum:**

|                    |           |                  |                |
|--------------------|-----------|------------------|----------------|
| <b>Scan number</b> | 5596      | <b>Raw file</b>  | OGE-Mock-Frac8 |
| <b>Method</b>      | ITMS; CID | <b>Genenames</b> | PALMD          |

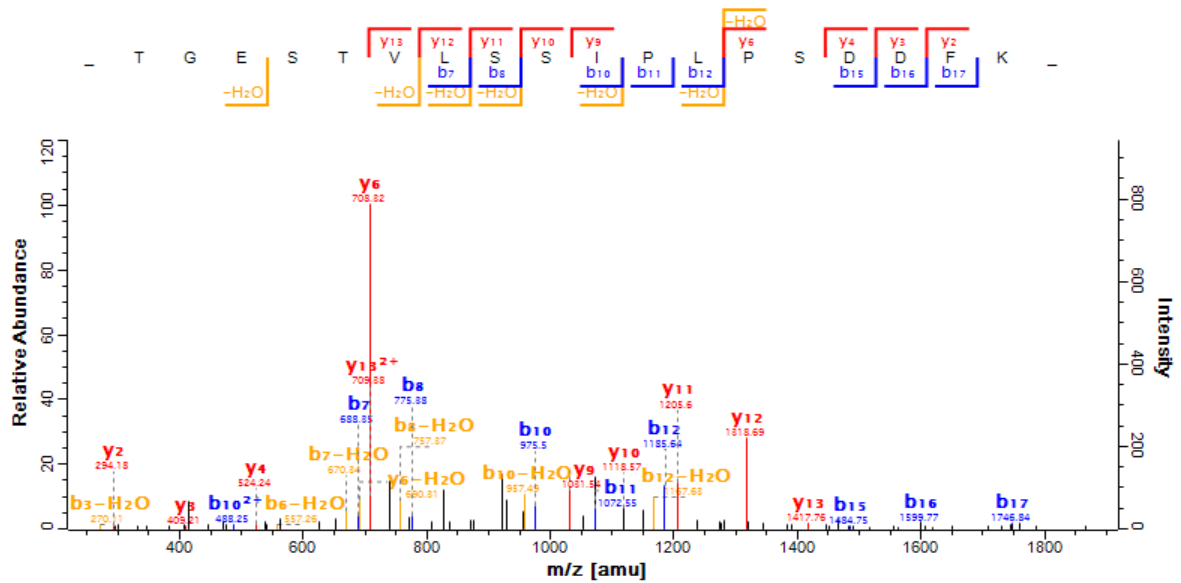

**Protein Group ID:** 3205  
**Protein Accession Numbers:** Q9NQ4  
**Gene Names:** EXOSC5  
**Peptide Sequence:** AVLTFALDSVER  
**Total Number of Spectra:** 4  
**Number of Replicates (out of 10):** 4  
**Best Match Score:** 166.7  
**Best Match Posterior Error Probability:** 5.07E-07  
**Best Match Spectrum:**

**Scan number** 4311      **Raw file** Prt-OGE-Batch2-WT-Frac17  
**Method** ITMS; CID      **Genenames** EXOSC5

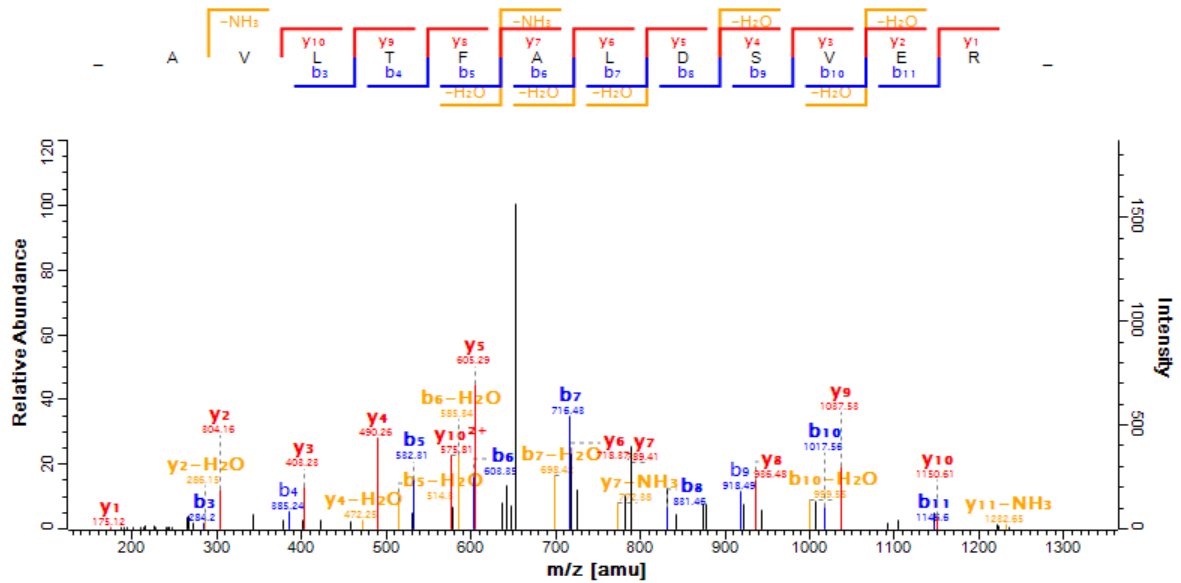

**Protein Group ID:** 3220  
**Protein Accession Numbers:** Q9NRP4  
**Gene Names:** ACN9  
**Peptide Sequence:** FLQEWVYATALLQQANENR  
**Total Number of Spectra:** 2  
**Number of Replicates (out of 10):** 2  
**Best Match Score:** 186.94  
**Best Match Posterior Error Probability:** 1.36E-34  
**Best Match Spectrum:**

**Scan number** 7706      **Raw file** Prt-OGE-Batch2-Mock-Frac20  
**Method** ITMS; CID      **Genenames** ACN9

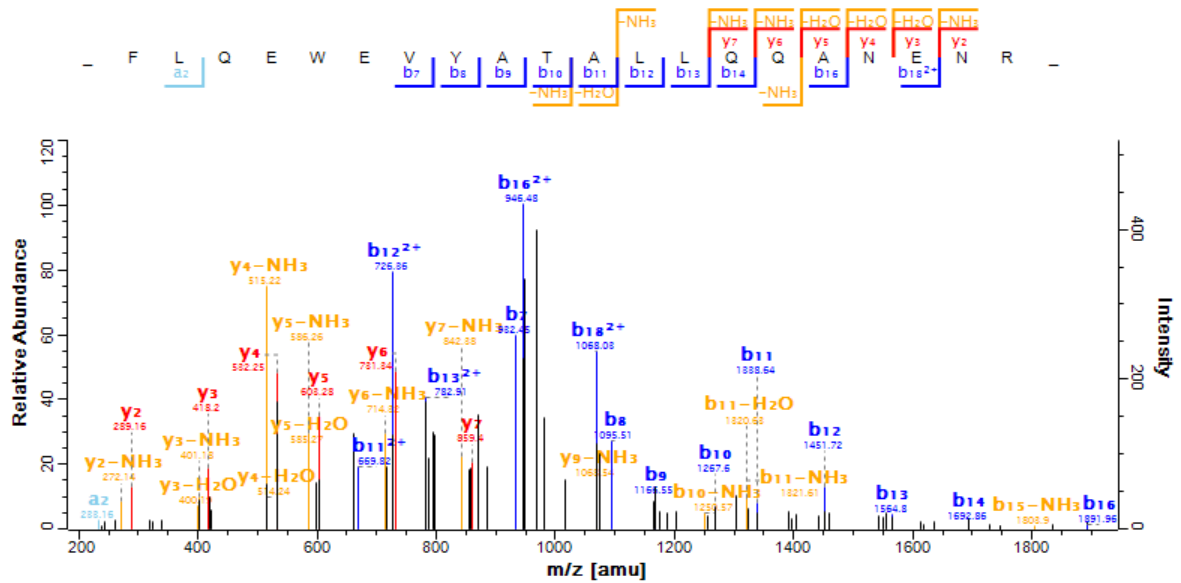

**Protein Group ID:** 3223  
**Protein Accession Numbers:** Q9NRW7  
**Gene Names:** VPS45  
**Peptide Sequence:** SFLEEVLASGLHSR  
**Total Number of Spectra:** 3  
**Number of Replicates (out of 10):** 3  
**Best Match Score:** 156.08  
**Best Match Posterior Error Probability:** 1.84E-08  
**Best Match Spectrum:**

**Scan number** 6006      **Raw file** 20100930-KD-Batch5-Prt-OGE-WT-Frac19  
**Method** ITMS; CID      **Genenames** VPS45

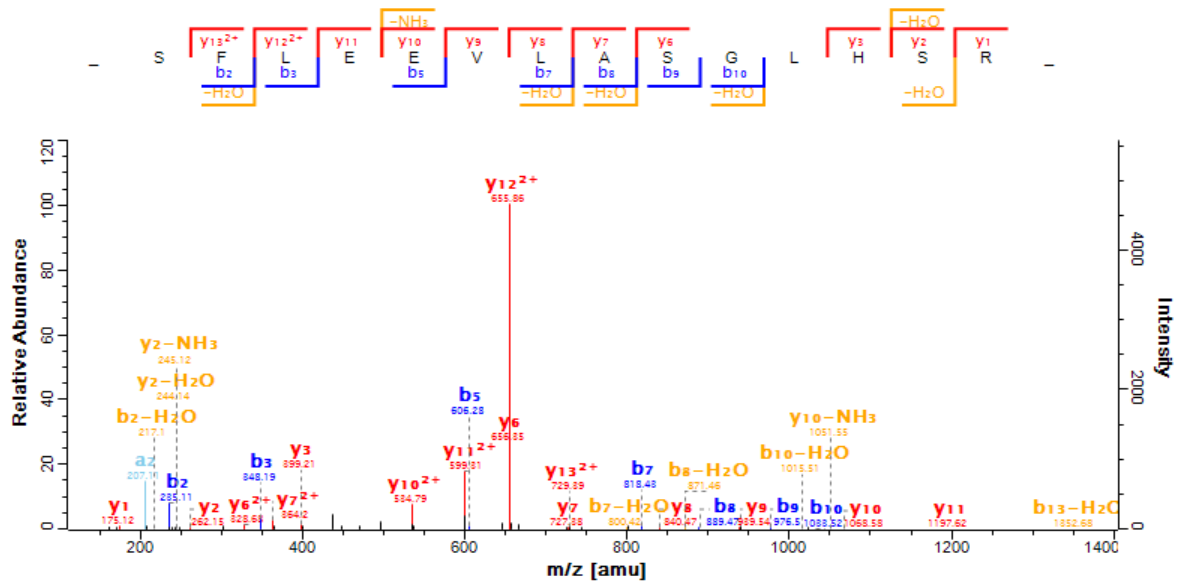

**Protein Group ID:** 3227  
**Protein Accession Numbers:** Q9NRY4  
**Gene Names:** ARHGAP35  
**Peptide Sequence:** IPFDLMDTVPAEQLYEAHLEK  
**Total Number of Spectra:** 1  
**Number of Replicates (out of 10):** 1  
**Best Match Score:** 87.49  
**Best Match Posterior Error Probability:** 7.46E-05  
**Best Match Spectrum:**

**Scan number** 6714      **Raw file** Prt-OGE-Batch3--Mock-Frac13  
**Method** ITMS; CID      **Genenames** ARHGAP35

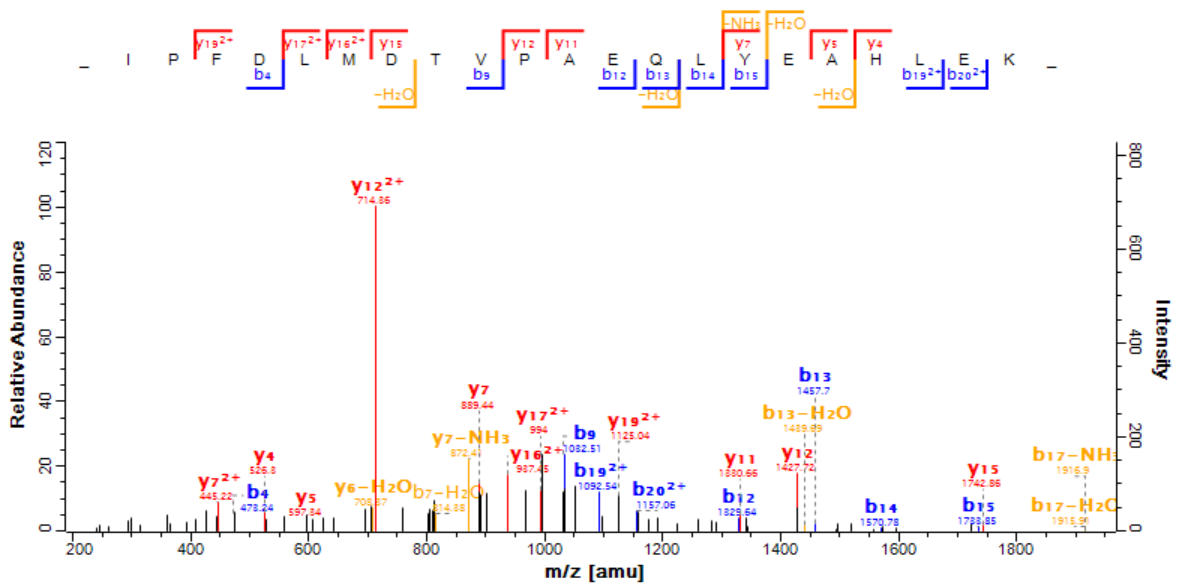

**Protein Group ID:** 3245  
**Protein Accession Numbers:** Q9NV70; Q9NV70-2  
**Gene Names:** EXOC1  
**Peptide Sequence:** LLSEIEFLVNHMDLAK  
**Total Number of Spectra:** 5  
**Number of Replicates (out of 10):** 3  
**Best Match Score:** 81.904  
**Best Match Posterior Error Probability:** 0.00092031  
**Best Match Spectrum:**

**Scan number** 6220      **Raw file** OGE-WT-Frac16  
**Method** ITMS; CID      **Genenames** EXOC1

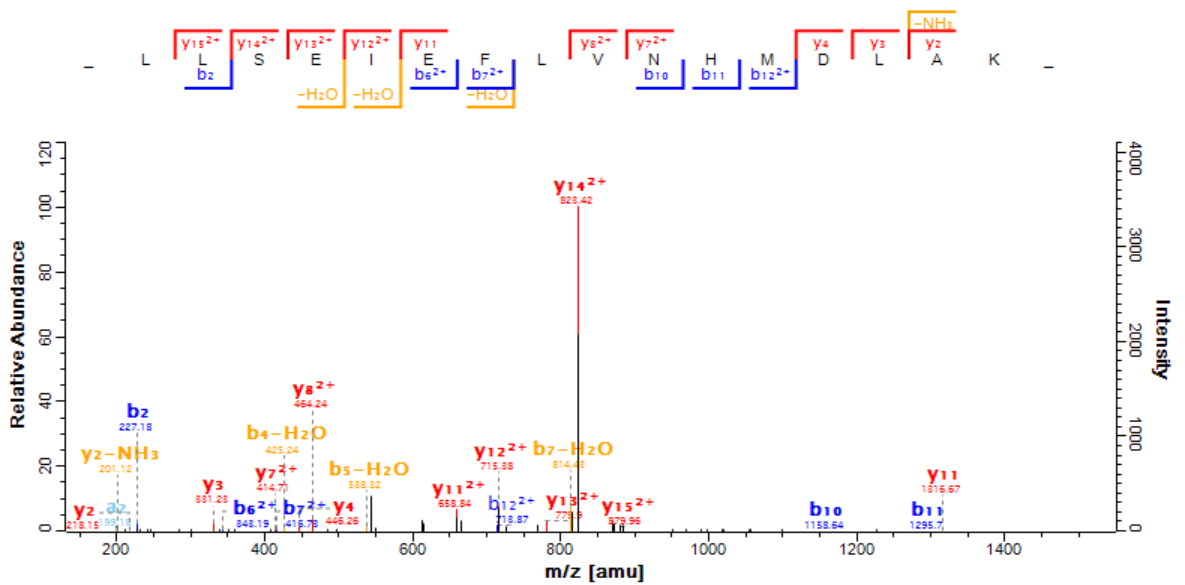

**Protein Group ID:** 3251

**Protein Accession Numbers:** Q9NVX0; Q9NVX0-3; Q9NVX0-2

**Gene Names:** HAUS2

**Peptide Sequence:** MDILVTETEELAENLK

**Total Number of Spectra:** 2

**Number of Replicates (out of 10):** 2

**Best Match Score:** 146.2

**Best Match Posterior Error Probability:** 3.35E-07

**Best Match Spectrum:**

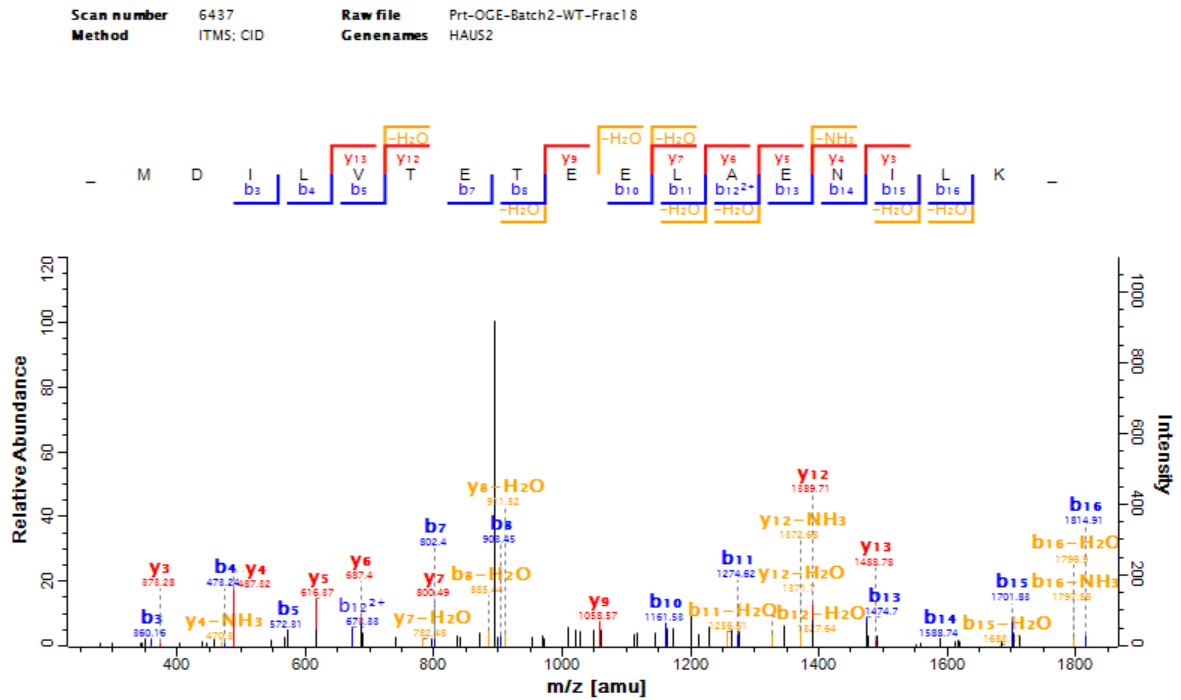

**Protein Group ID:** 3254  
**Protein Accession Numbers:** Q9NWT6  
**Gene Names:** HIF1AN  
**Peptide Sequence:** EEAGALGPAWDESQR  
**Total Number of Spectra:** 1  
**Number of Replicates (out of 10):** 1  
**Best Match Score:** 136.39  
**Best Match Posterior Error Probability:** 1.06E-05  
**Best Match Spectrum:**

**Scan number** 4209      **Raw file** Prt-OGE-Batch3-Mock-Frac8  
**Method** ITMS; CID      **Genenames** HIF1AN

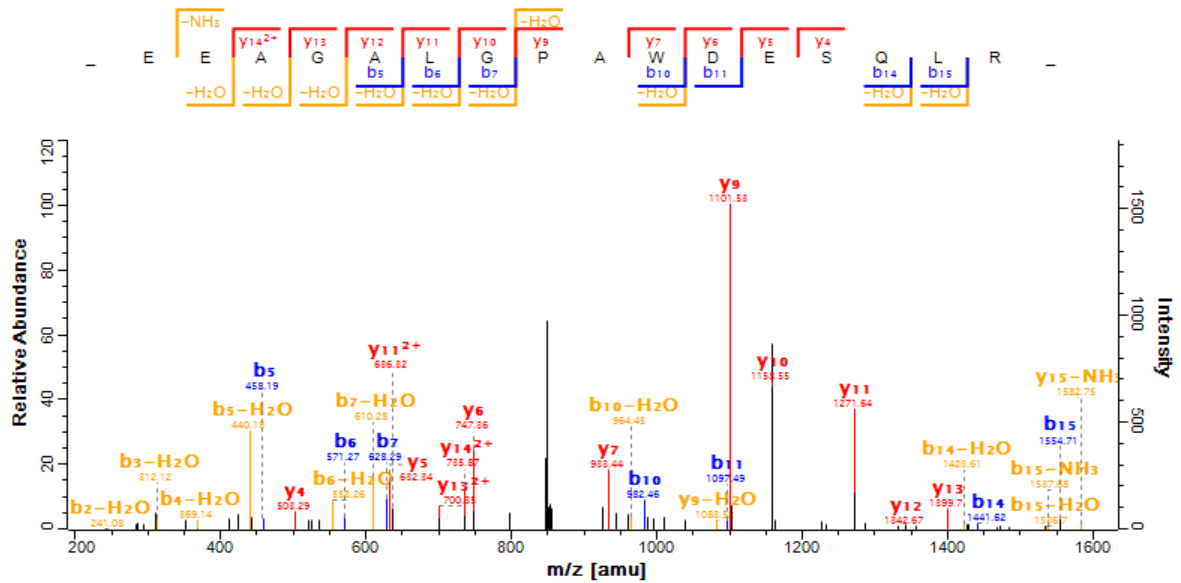



**Protein Group ID:** 3258  
**Protein Accession Numbers:** Q9NX01  
**Gene Names:** TXNL4B  
**Peptide Sequence:** LIVQSPIDPK  
**Total Number of Spectra:** 3  
**Number of Replicates (out of 10):** 3  
**Best Match Score:** 98.04  
**Best Match Posterior Error Probability:** 0.00061806  
**Best Match Spectrum:**

**Scan number** 3261 **Raw file** 20100914-KD-Batch4-Prt-OGE-Mock-Frac8  
**Method** ITMS; CID **Genenames** TXNL4B

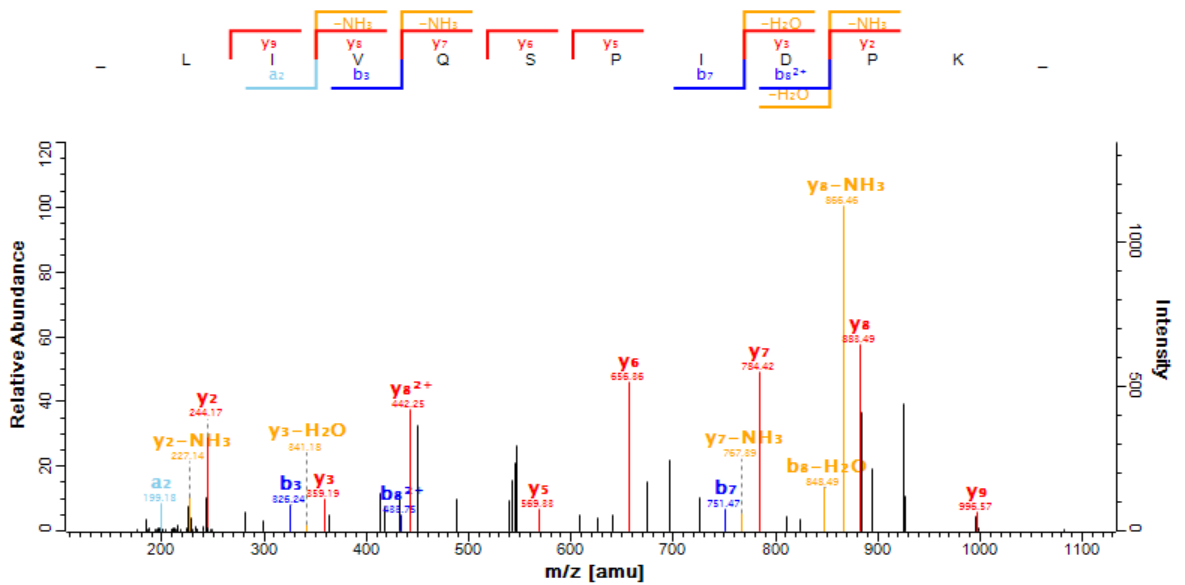

**Protein Group ID:** 3264  
**Protein Accession Numbers:** Q9NX58  
**Gene Names:** LYAR  
**Peptide Sequence:** LPEHPEGGEPEDDEAPAK  
**Total Number of Spectra:** 1  
**Number of Replicates (out of 10):** 1  
**Best Match Score:** 88.19  
**Best Match Posterior Error Probability:** 0.00049923  
**Best Match Spectrum:**

**Scan number** 1289      **Raw file** 20100930-KD-Batch5-Prt-OGE-WT-Frac18  
**Method** ITMS; CID      **Genenames** LYAR

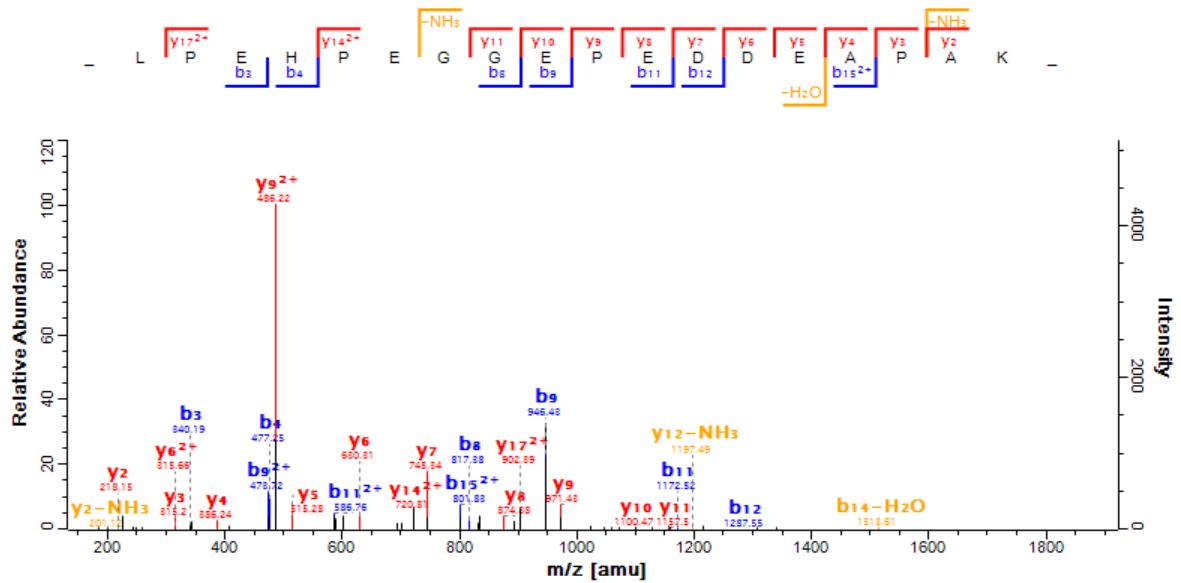

**Protein Group ID:** 3265  
**Protein Accession Numbers:** Q9NX62  
**Gene Names:** IMPAD1  
**Peptide Sequence:** EMLAVSVLAAVR  
**Total Number of Spectra:** 1  
**Number of Replicates (out of 10):** 1  
**Best Match Score:** 125.97  
**Best Match Posterior Error Probability:** 0.00018825  
**Best Match Spectrum:**

**Scan number** 6160      **Raw file** Prt-OGE-Batch3-Mock-Frac8  
**Method** ITMS; CID      **Genenames** IMPAD1

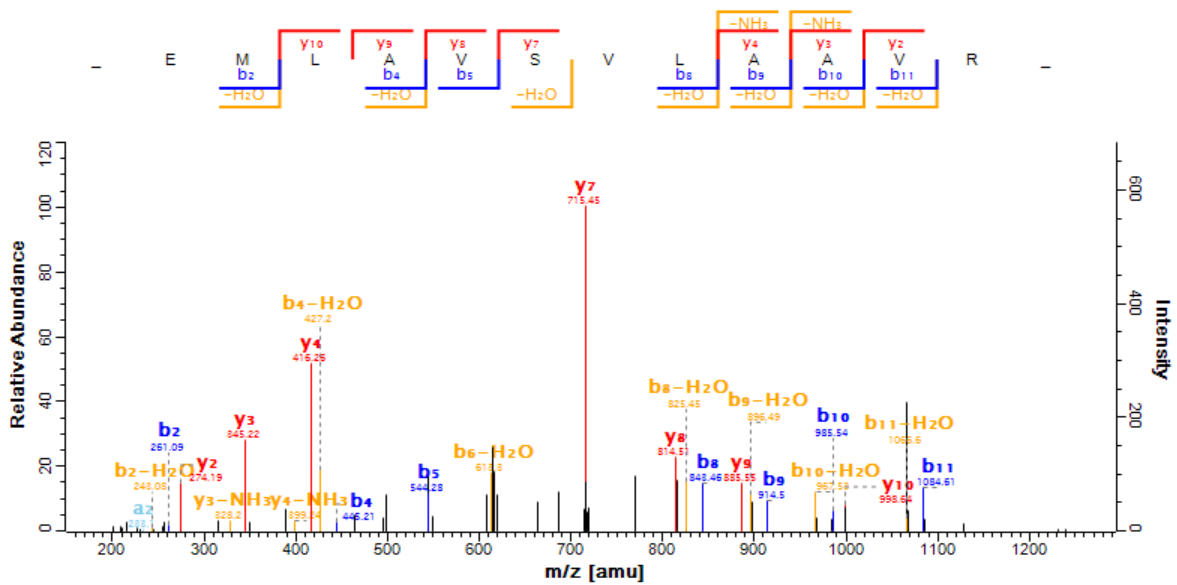

**Protein Group ID:** 3268

**Protein Accession Numbers:** Q9NXX6; Q9NXX6-2

**Gene Names:** NSMCE4A

**Peptide Sequence:** EDILNAGDKLTEVLEEANNTLTFNENR

**Total Number of Spectra:** 6

**Number of Replicates (out of 10):** 5

**Best Match Score:** 121.33

**Best Match Posterior Error Probability:** 3.12E-16

**Best Match Spectrum:**

**Scan number** 7602      **Raw file** OGE-WT-Frac6  
**Method** ITMS; CID      **Genenames** NSMCE4A

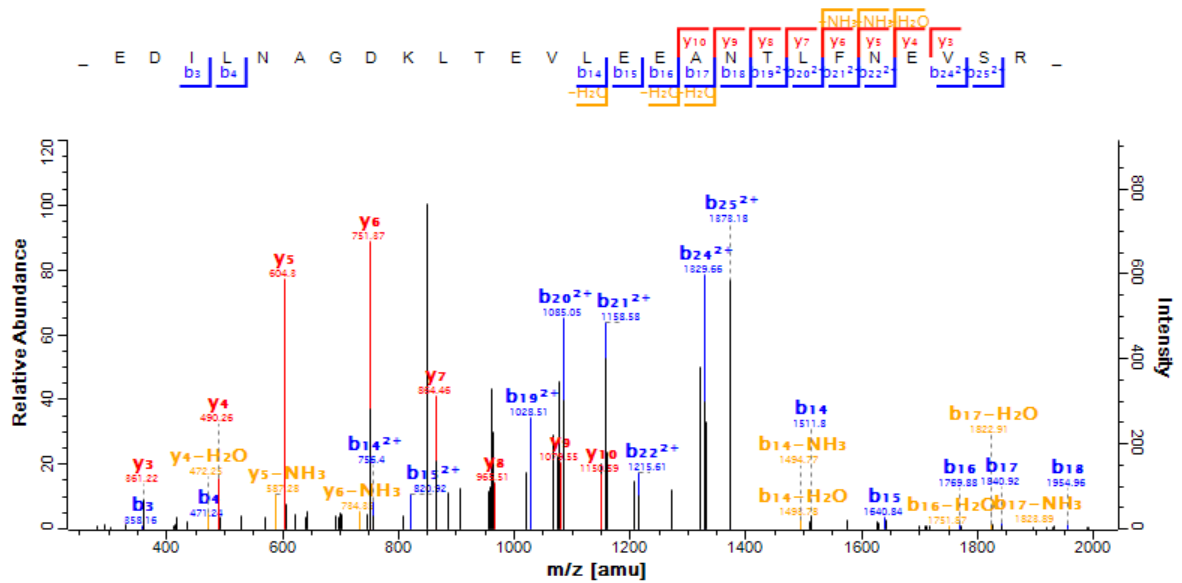

**Protein Group ID:** 3277  
**Protein Accession Numbers:** Q9NZI7; Q9NZI7-4  
**Gene Names:** UBPI  
**Peptide Sequence:** LLDLDIPMSVGIIDTR  
**Total Number of Spectra:** 1  
**Number of Replicates (out of 10):** 1  
**Best Match Score:** 123.02  
**Best Match Posterior Error Probability:** 8.64E-05  
**Best Match Spectrum:**

**Scan number** 5819      **Raw file** Prt-OGE-Batch2-WT-Frac12  
**Method** ITMS; CID      **Genenames** UBPI

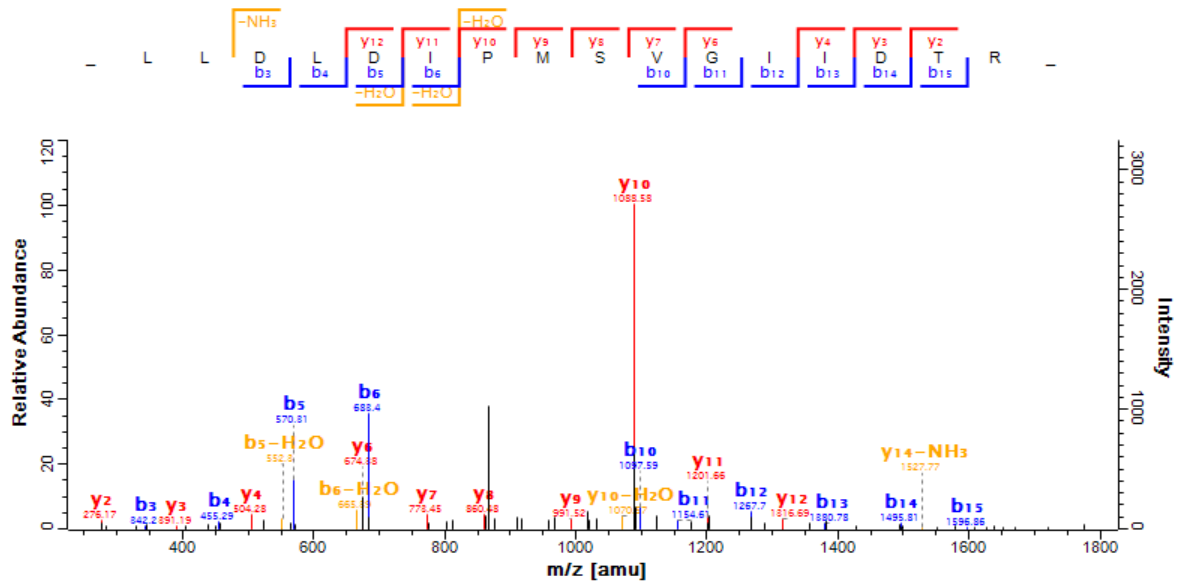

**Protein Group ID:** 3288  
**Protein Accession Numbers:** Q9P016  
**Gene Names:** THYN1  
**Peptide Sequence:** WSMVDVQFVR  
**Total Number of Spectra:** 6  
**Number of Replicates (out of 10):** 5  
**Best Match Score:** 128.01  
**Best Match Posterior Error Probability:** 9.43E-05  
**Best Match Spectrum:**

**Scan number** 4868      **Raw file** 20100917-KD-Batch5-Prt-OGE-Mock-Frac22  
**Method** ITMS; CID      **Genenames** THYN1

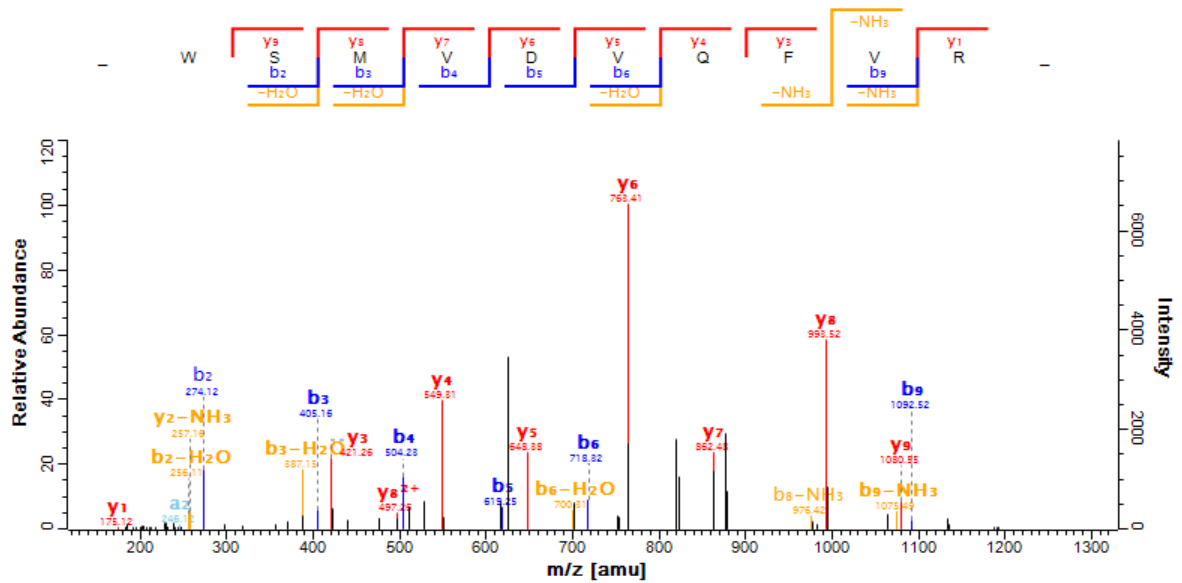

**Protein Group ID:** 3289  
**Protein Accession Numbers:** Q9P021  
**Gene Names:** CRIPT  
**Peptide Sequence:** LGTVITPDTWK  
**Total Number of Spectra:** 6  
**Number of Replicates (out of 10):** 3  
**Best Match Score:** 108.7  
**Best Match Posterior Error Probability:** 0.00015808  
**Best Match Spectrum:**

**Scan number** 2574      **Raw file** 20100914-KD-Batch4-Prt-OGE-Mock-Frac22  
**Method** ITMS; CID      **Genenames** CRIPT

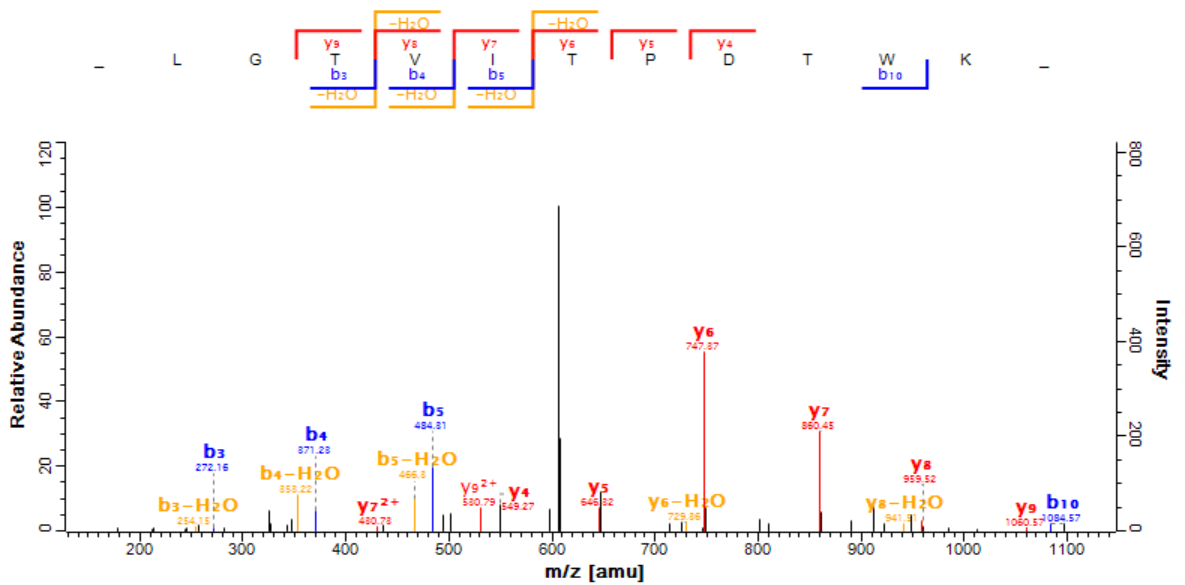

**Protein Group ID:** 3296  
**Protein Accession Numbers:** Q9P0S2  
**Gene Names:** COX16  
**Peptide Sequence:** PWEDPDLLQGR  
**Total Number of Spectra:** 4  
**Number of Replicates (out of 10):** 3  
**Best Match Score:** 130.56  
**Best Match Posterior Error Probability:** 4.15E-05  
**Best Match Spectrum:**

**Scan number** 3243      **Raw file** OGE-WT-Frac23  
**Method** ITMS; CID      **Genenames** COX16

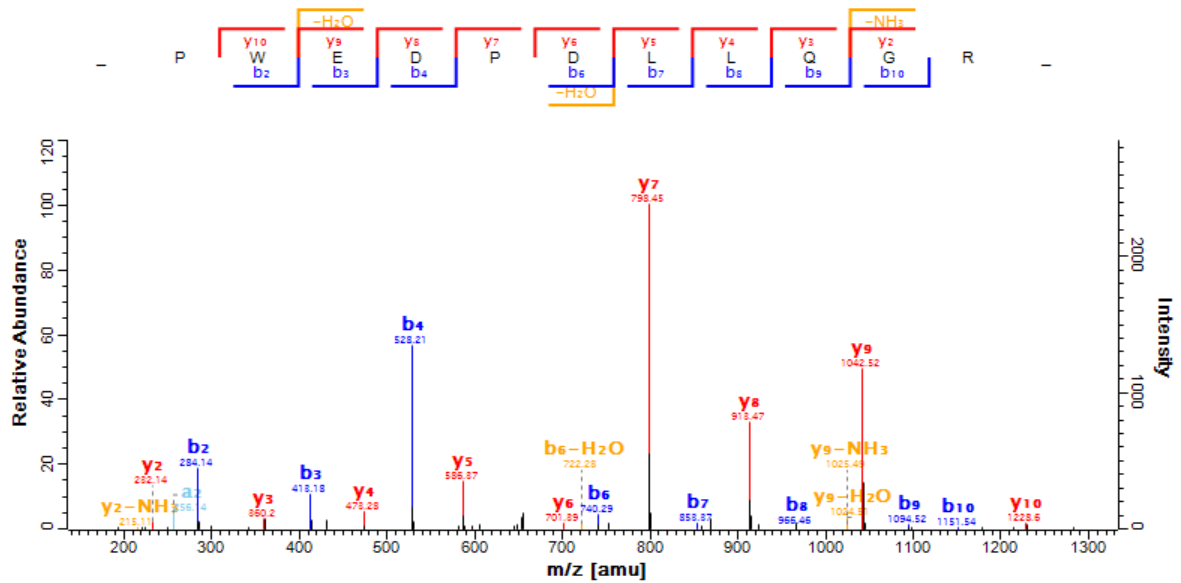



**Protein Group ID:** 3298

**Protein Accession Numbers:** Q9P1Z9-2; Q9P1Z9

**Gene Names:** C9orf174

**Peptide Sequence:** CQVAKSNSQTNGLNFSLQQLQNKIK

**Total Number of Spectra:** 1

**Number of Replicates (out of 10):** 1

**Best Match Score:** 74.048

**Best Match Posterior Error Probability:** 0.0031304

**Best Match Spectrum:**

**Scan number** 4998      **Raw file** 20100917-KD-Batch5-Prt-OGE-Mock-Frac10  
**Method** ITMS; CID      **Genenames** C9orf174

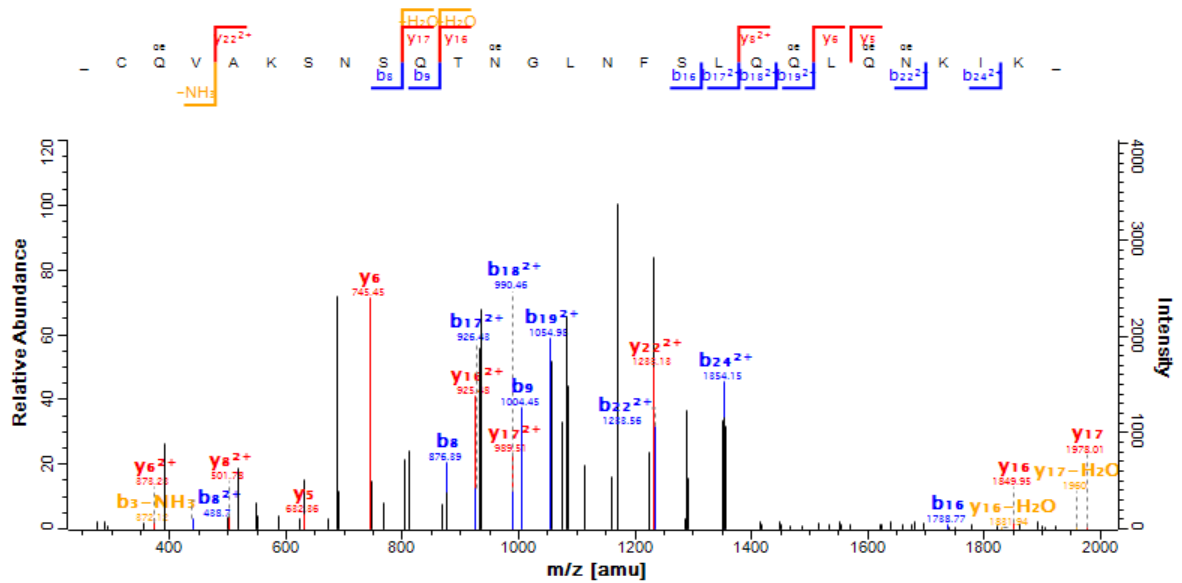

**Protein Group ID:** 3307  
**Protein Accession Numbers:** Q9UBB5; Q9UBB5-3  
**Gene Names:** MBD2  
**Peptide Sequence:** YLGNTVDLSSFDFR  
**Total Number of Spectra:** 1  
**Number of Replicates (out of 10):** 1  
**Best Match Score:** 86.944  
**Best Match Posterior Error Probability:** 0.00076693  
**Best Match Spectrum:**

**Scan number** 4656      **Raw file** Prt-OGE-Batch2-WT-Frac21  
**Method** ITMS; CID      **Genenames** MBD2

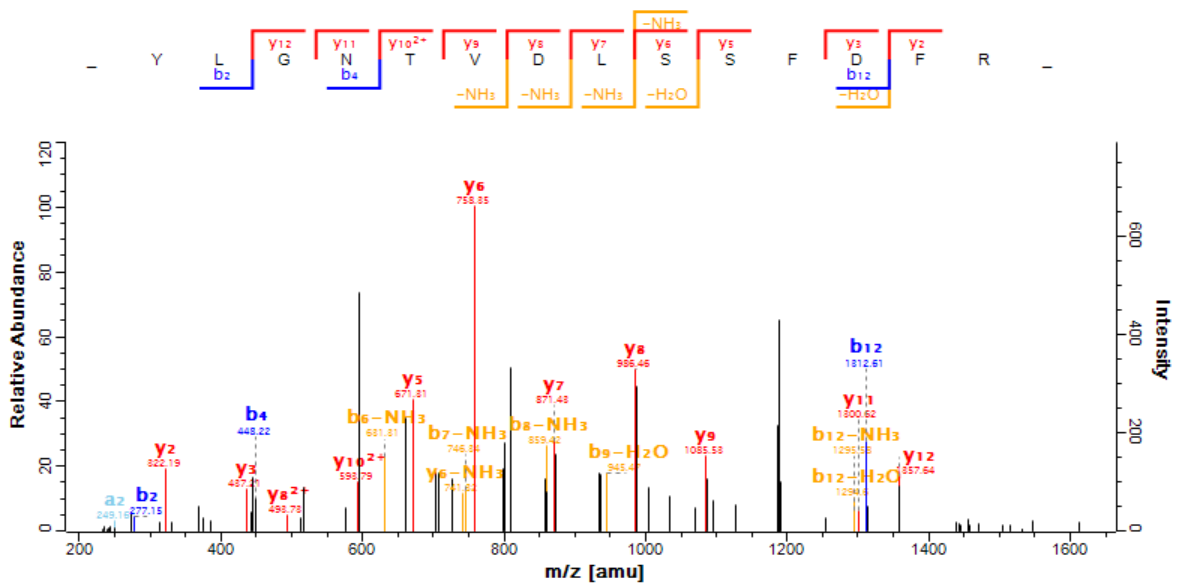

**Protein Group ID:** 3309  
**Protein Accession Numbers:** Q9UBF2  
**Gene Names:** COPG2  
**Peptide Sequence:** FGAQNESLLPSILVLLQR  
**Total Number of Spectra:** 3  
**Number of Replicates (out of 10):** 2  
**Best Match Score:** 106.6  
**Best Match Posterior Error Probability:** 0.0001471  
**Best Match Spectrum:**

**Scan number** 7227      **Raw file** OGE-Mock-Frac11  
**Method** ITMS; CID      **Genenames** COPG2

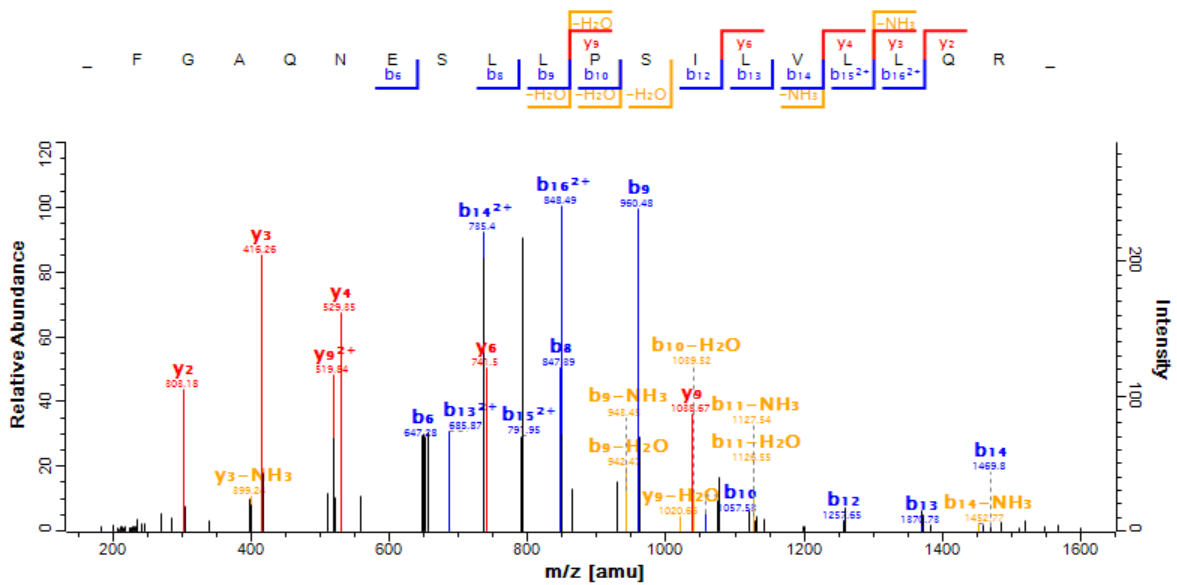

**Protein Group ID:** 3312  
**Protein Accession Numbers:** Q9UBK9  
**Gene Names:** UXT  
**Peptide Sequence:** YETFISDVLQR  
**Total Number of Spectra:** 1  
**Number of Replicates (out of 10):** 1  
**Best Match Score:** 125.97  
**Best Match Posterior Error Probability:** 1.82E-06  
**Best Match Spectrum:**

**Scan number** 4928      **Raw file** 20100917-KD-Batch5-Prt-OGE-Mock-Frac17  
**Method** ITMS; CID      **Genenames** UXT

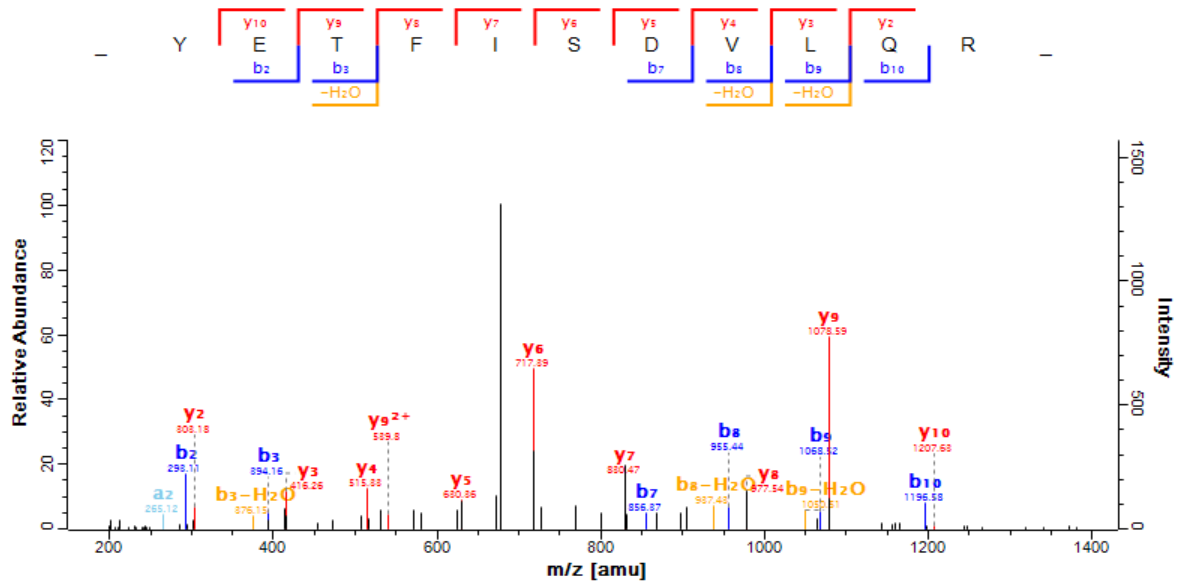

**Protein Group ID:** 3335  
**Protein Accession Numbers:** Q9UHI6  
**Gene Names:** SHPK  
**Peptide Sequence:** AFPLPMSFGQDVDAAVGAALVMLR  
**Total Number of Spectra:** 1  
**Number of Replicates (out of 10):** 1  
**Best Match Score:** 93.5  
**Best Match Posterior Error Probability:** 2.89E-06  
**Best Match Spectrum:**

**Scan number** 8880      **Raw file** 20100914-KD-Batch4-Prt-OGE-Mock-Frac16  
**Method** ITMS; CID      **Genenames** SHPK

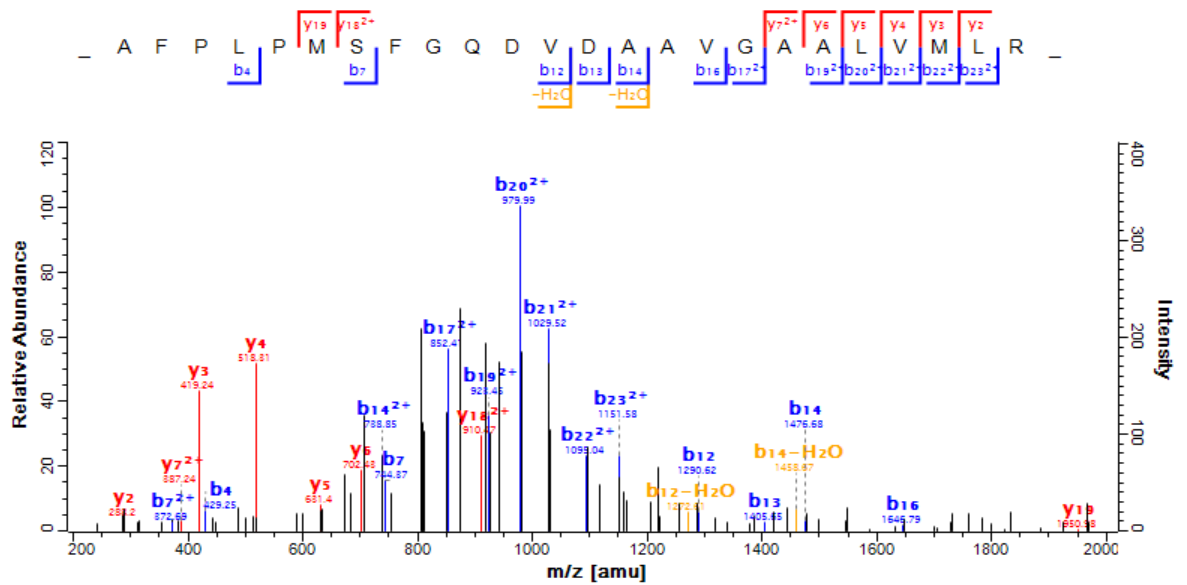

**Protein Group ID:** 3338  
**Protein Accession Numbers:** Q9UHR6  
**Gene Names:** ZNHIT2  
**Peptide Sequence:** AHQAHAVVAEEVAALTEGELER  
**Total Number of Spectra:** 1  
**Number of Replicates (out of 10):** 1  
**Best Match Score:** 81.854  
**Best Match Posterior Error Probability:** 0.00028614  
**Best Match Spectrum:**

**Scan number** 5735      **Raw file** Prt-OGE-Batch3--Mock-Frac11  
**Method** ITMS; CID      **Genenames** ZNHIT2

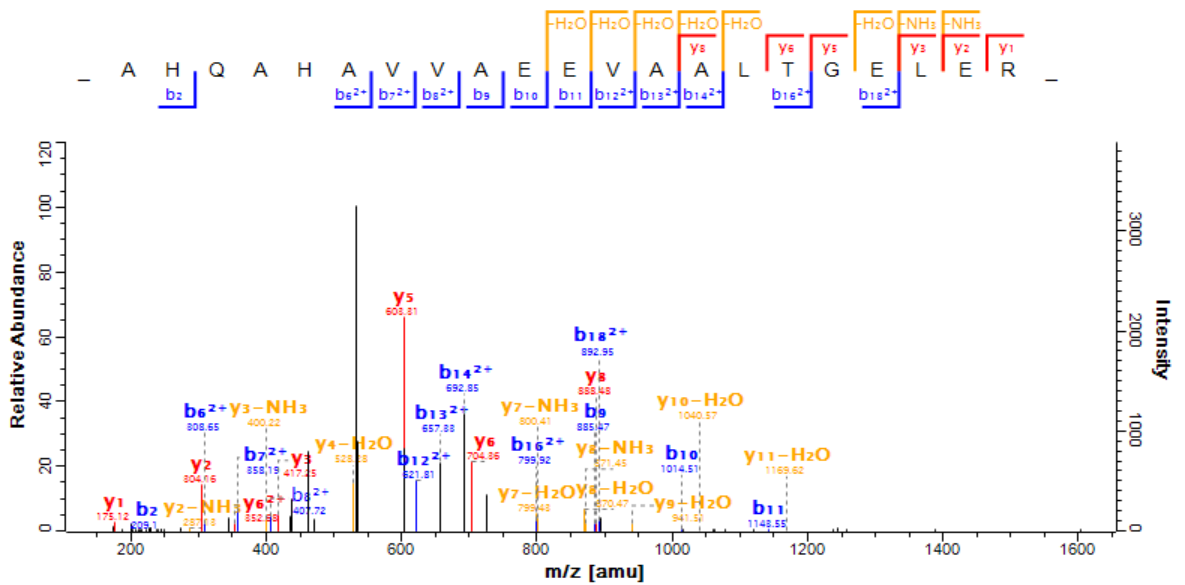

**Protein Group ID:** 3365

**Protein Accession Numbers:** Q9UKT9; Q9UKT9-7; Q9UKT9-3; Q9UKT9-4; Q9UKT9-15; Q9UKT9-2; Q9UKT9-8; Q9UKT9-6; Q9UKT9-5; Q9UKT9-13; Q9UKT9-14

**Gene Names:** IKZF3

**Peptide Sequence:** EYNEYENIK

**Total Number of Spectra:** 23

**Number of Replicates (out of 10):** 7

**Best Match Score:** 95.502

**Best Match Posterior Error Probability:** 0.0011517

**Best Match Spectrum:**

|                    |           |                  |                                        |
|--------------------|-----------|------------------|----------------------------------------|
| <b>Scan number</b> | 3916      | <b>Raw file</b>  | 20100917-KD-Batch5-Prt-OGE-Mock-Frac21 |
| <b>Method</b>      | ITMS; CID | <b>Genenames</b> | IKZF3                                  |

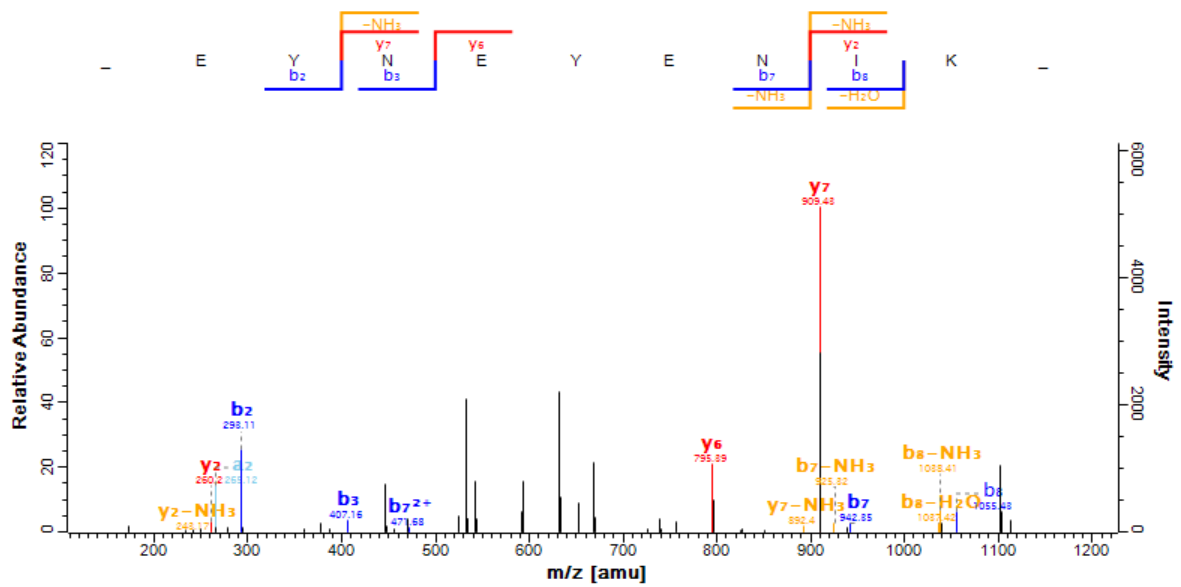

**Protein Group ID:** 3374  
**Protein Accession Numbers:** Q9ULR5  
**Gene Names:** PAIP2B  
**Peptide Sequence:** MNGSNMANTSPSVK  
**Total Number of Spectra:** 1  
**Number of Replicates (out of 10):** 1  
**Best Match Score:** 30.567  
**Best Match Posterior Error Probability:** 0.0072043  
**Best Match Spectrum:**

**Scan number** 7868      **Raw file** OGE-Mock-Frac11  
**Method** ITMS; CID      **Genenames** PAIP2B

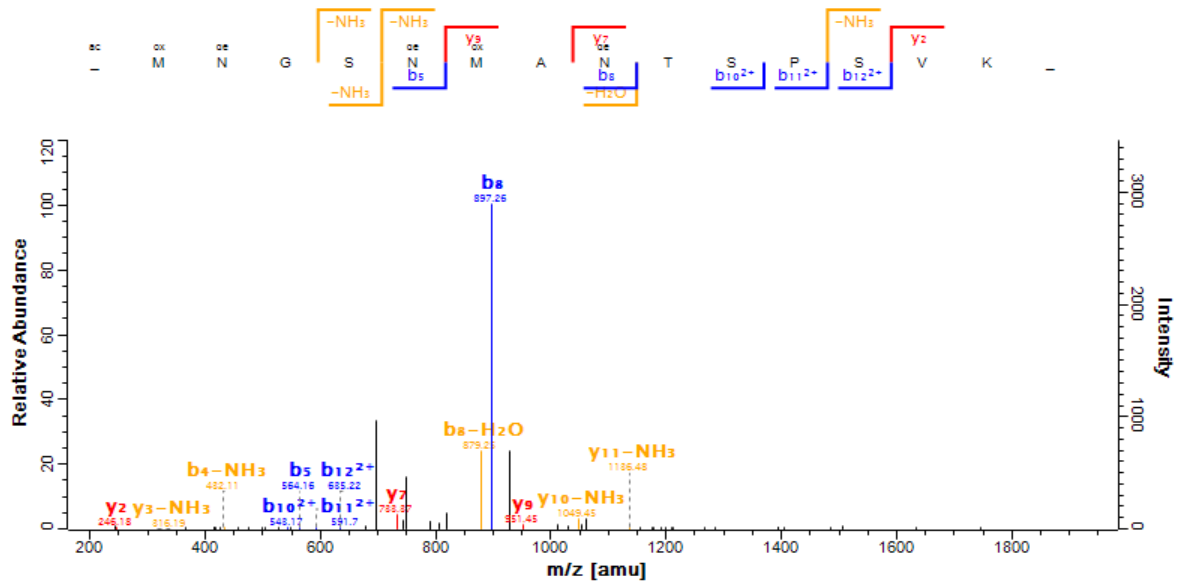



**Protein Group ID:** 3396  
**Protein Accession Numbers:** Q9UPT8  
**Gene Names:** ZC3H4  
**Peptide Sequence:** TVLWNPEDLIPLIPK  
**Total Number of Spectra:** 17  
**Number of Replicates (out of 10):** 7  
**Best Match Score:** 120.7  
**Best Match Posterior Error Probability:** 0.00010684  
**Best Match Spectrum:**

**Scan number** 6300      **Raw file** Prt-OGE-Batch2-WT-Frac14  
**Method** ITMS; CID      **Genenames** ZC3H4

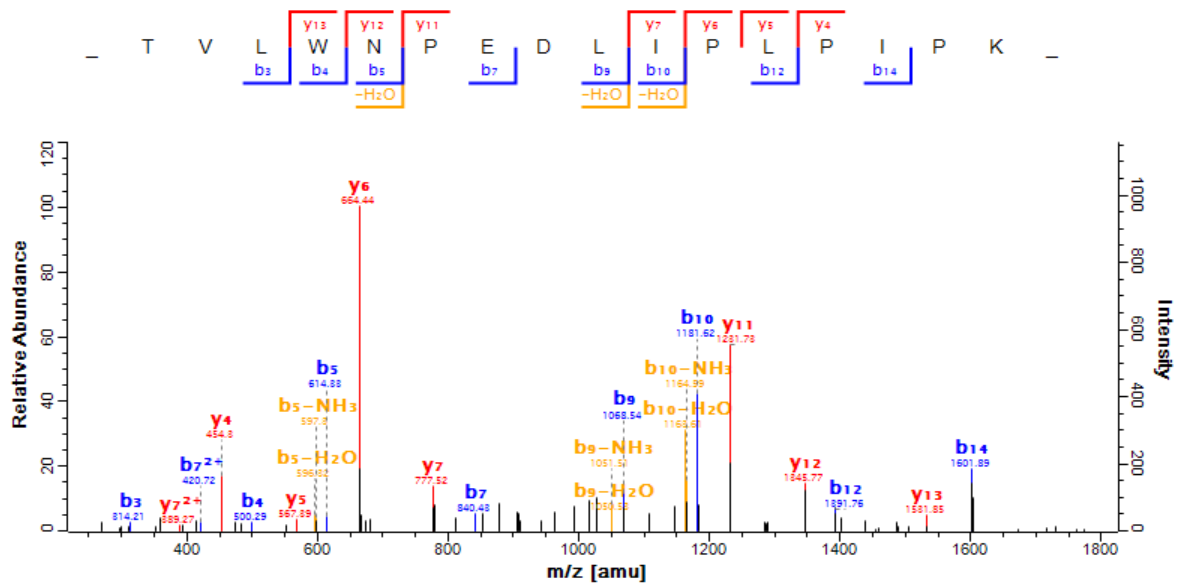

**Protein Group ID:** 3419  
**Protein Accession Numbers:** Q9Y2S2; Q9Y2S2-2  
**Gene Names:** CRYL1  
**Peptide Sequence:** LVEEGIVSPSDLVMS EGLGM R  
**Total Number of Spectra:** 1  
**Number of Replicates (out of 10):** 1  
**Best Match Score:** 107.72  
**Best Match Posterior Error Probability:** 8.14E-08  
**Best Match Spectrum:**

**Scan number** 6785      **Raw file** 20100917-KD-Batch5-Prt-OGE-Mock-Frac12  
**Method** ITMS; CID      **Genenames** CRYL1

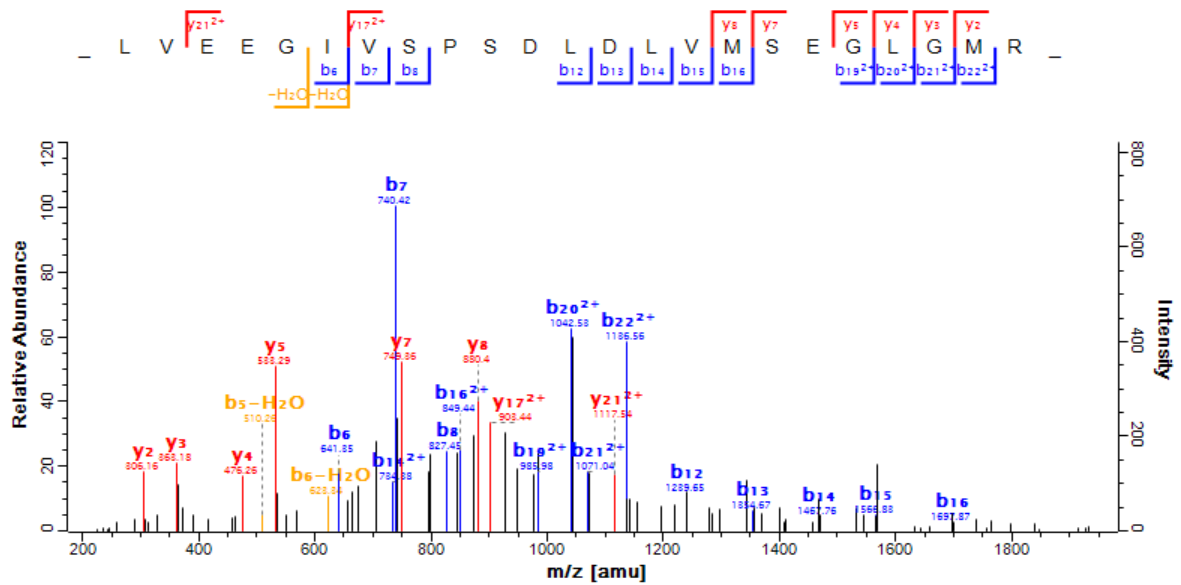

**Protein Group ID:** 3431  
**Protein Accession Numbers:** Q9Y320; Q9Y320-2  
**Gene Names:** TMX2  
**Peptide Sequence:** EFNLNELYQR  
**Total Number of Spectra:** 1  
**Number of Replicates (out of 10):** 1  
**Best Match Score:** 85.533  
**Best Match Posterior Error Probability:** 0.001677  
**Best Match Spectrum:**

**Scan number** 3327      **Raw file** Prt-OGE-Batch3-WT-Frac1  
**Method** ITMS; CID      **Genenames** TMX2

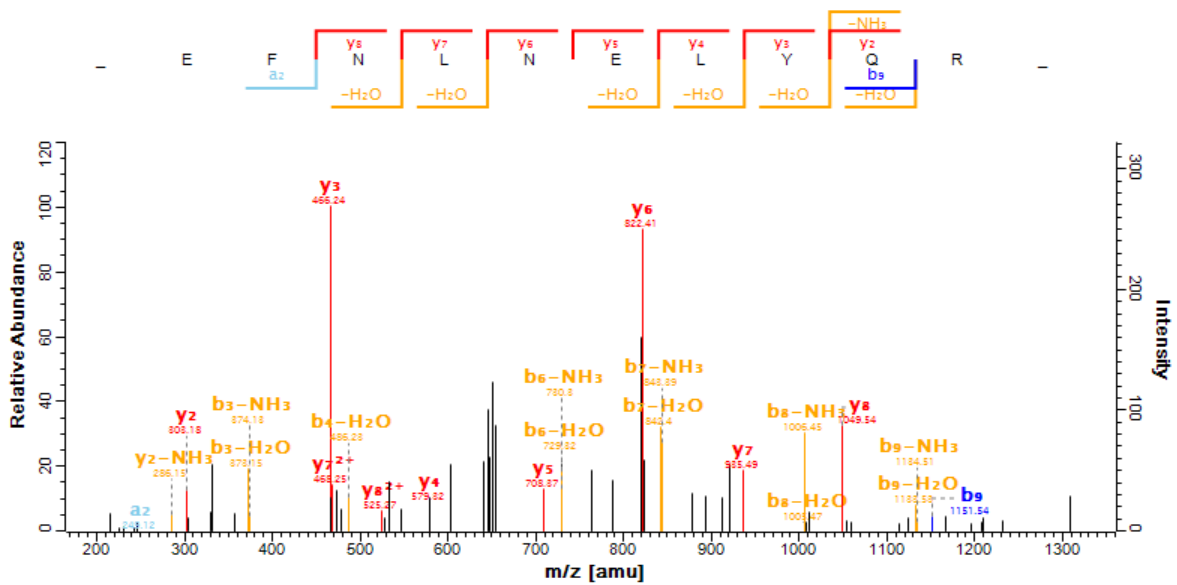

**Protein Group ID:** 3434  
**Protein Accession Numbers:** Q9Y376  
**Gene Names:** CAB39  
**Peptide Sequence:** FQNDRTED EQFNDEK  
**Total Number of Spectra:** 1  
**Number of Replicates (out of 10):** 1  
**Best Match Score:** 111.83  
**Best Match Posterior Error Probability:** 0.00018948  
**Best Match Spectrum:**

**Scan number** 890      **Raw file** 20100930-KD-Batch5-Prt-OGE-WT-Frac15  
**Method** ITMS; CID      **Genenames** CAB39

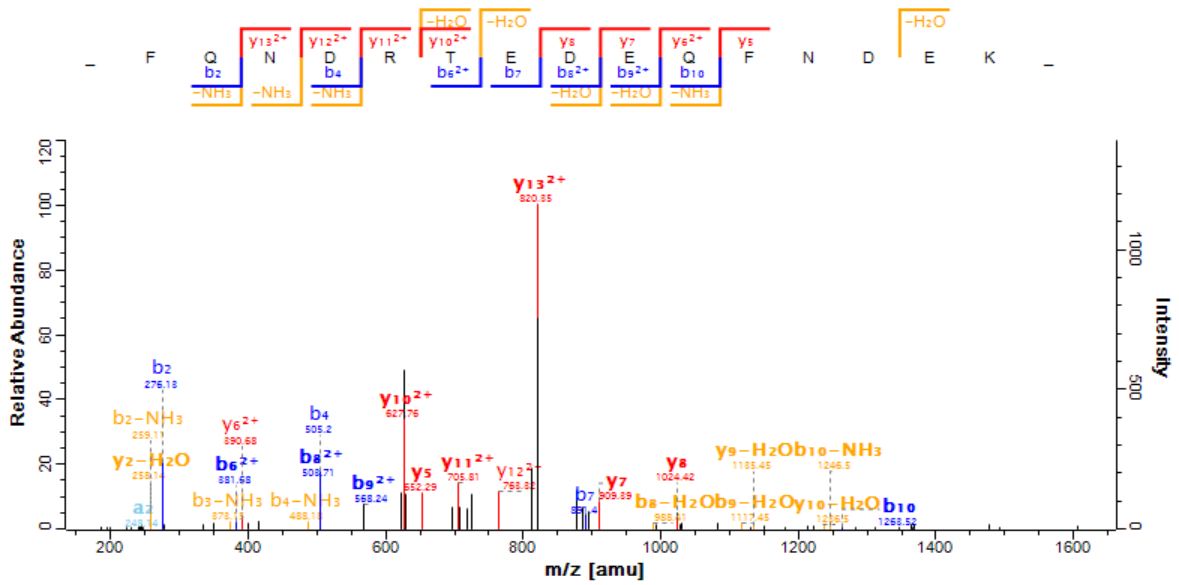

**Protein Group ID:** 3459  
**Protein Accession Numbers:** Q9Y3X0  
**Gene Names:** CCDC9  
**Peptide Sequence:** MAATLDLK  
**Total Number of Spectra:** 1  
**Number of Replicates (out of 10):** 1  
**Best Match Score:** 50.127  
**Best Match Posterior Error Probability:** 0.044436  
**Best Match Spectrum:**

**Scan number** 5300      **Raw file** OGE-Mock-Frac4  
**Method** ITMS; CID      **Genenames** CCDC9

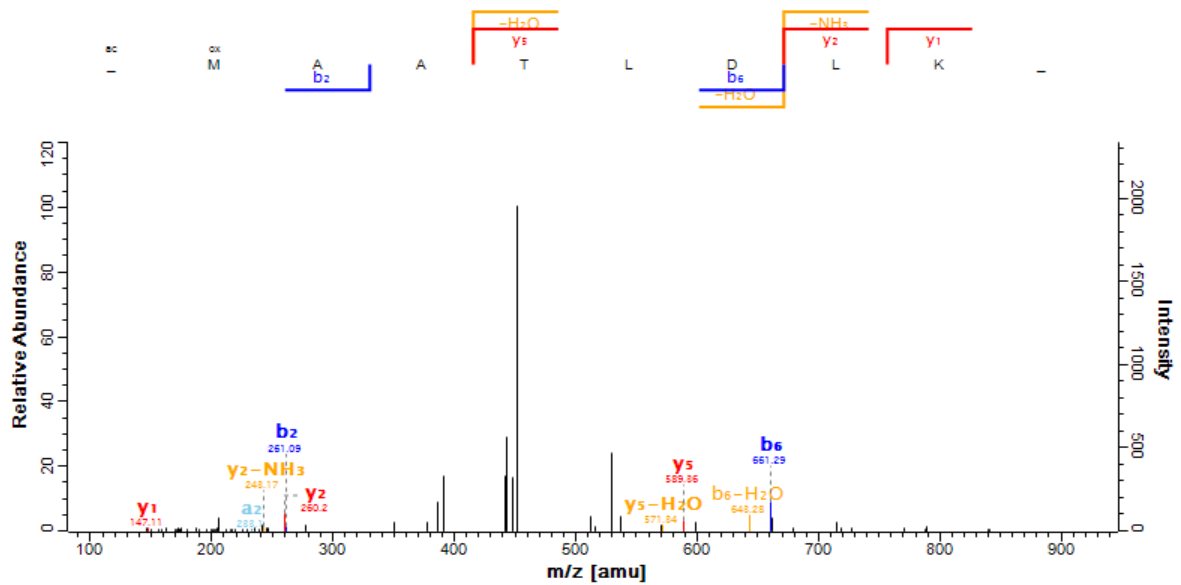



**Protein Group ID:** 3473  
**Protein Accession Numbers:** Q9Y5J7  
**Gene Names:** TIMM9  
**Peptide Sequence:** FQEYHIQQNEALAAK  
**Total Number of Spectra:** 7  
**Number of Replicates (out of 10):** 6  
**Best Match Score:** 134.61  
**Best Match Posterior Error Probability:** 7.38E-06  
**Best Match Spectrum:**

**Scan number** 2100      **Raw file** Prt-OGE-Batch3-WT-Frac14  
**Method** ITMS; CID      **Genenames** TIMM9

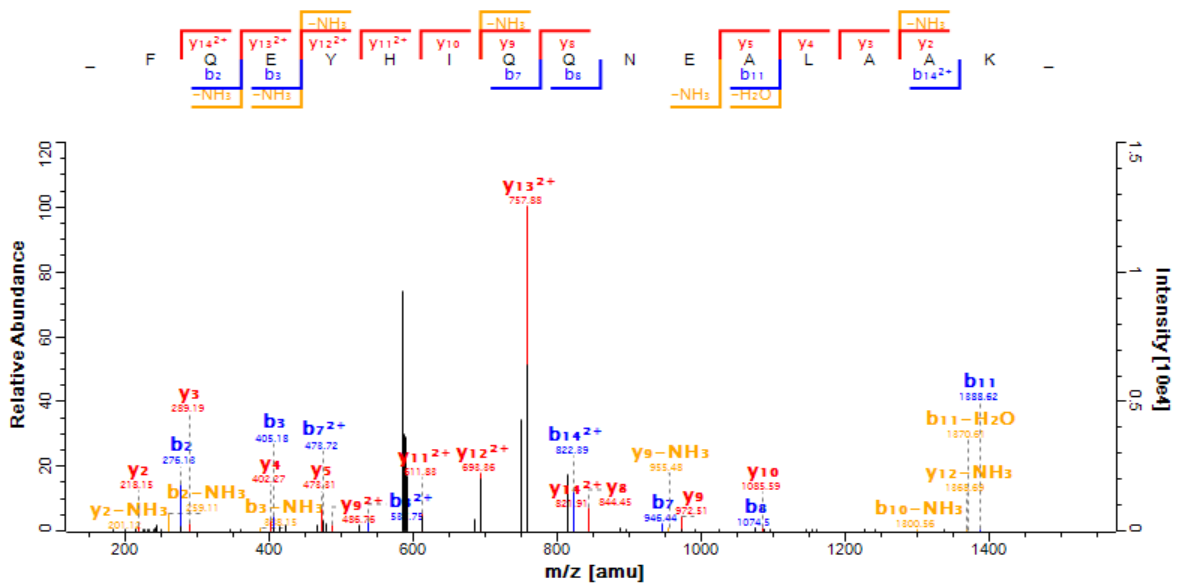

**Protein Group ID:** 3479

**Protein Accession Numbers:** Q9Y5U8

**Gene Names:** BRP44L

**Peptide Sequence:** DYLMSTHFWGPVANWGLPIAAAI<sup>+</sup>NDMK

**Total Number of Spectra:** 2

**Number of Replicates (out of 10):** 2

**Best Match Score:** 80.702

**Best Match Posterior Error Probability:** 6.85E-06

**Best Match Spectrum:**

**Scan number** 7059      **Raw file** 20100917-KD-Batch5-Prt-OGE-Mock-Frac23  
**Method** ITMS; CID      **Genenames** BRP44L

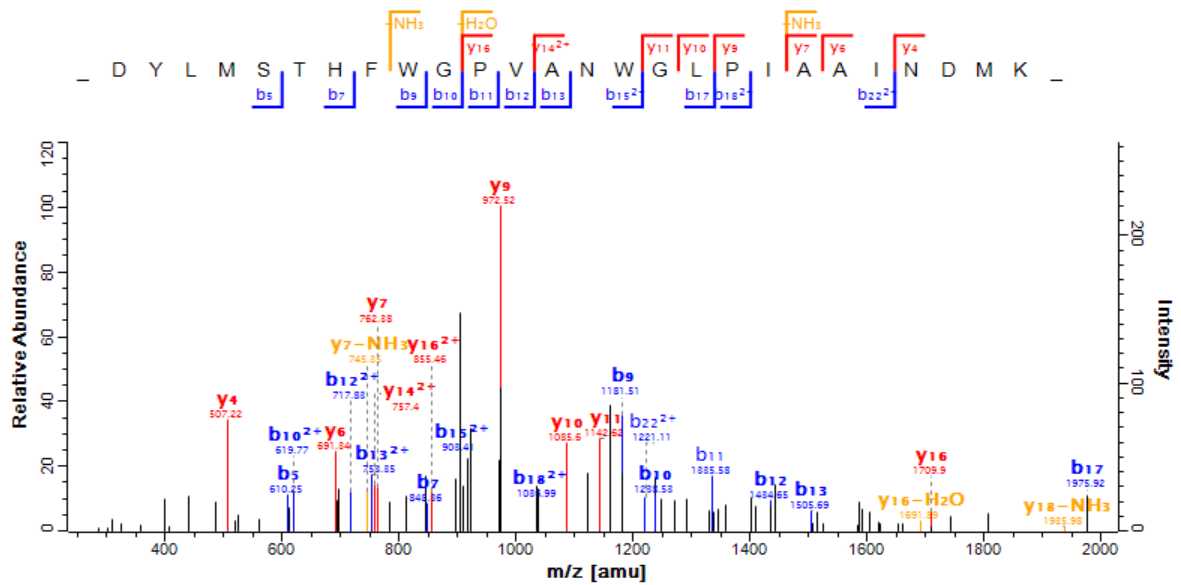



**Protein Group ID:** 3499  
**Protein Accession Numbers:** Q9Y6R6  
**Gene Names:** ZNF780B  
**Peptide Sequence:** ISPENDIFEINLPK  
**Total Number of Spectra:** 1  
**Number of Replicates (out of 10):** 1  
**Best Match Score:** 86.803  
**Best Match Posterior Error Probability:** 0.0086229  
**Best Match Spectrum:**

**Scan number** 3984      **Raw file** OGE-WT-Frac10  
**Method** ITMS; CID      **Genenames** ZNF780B

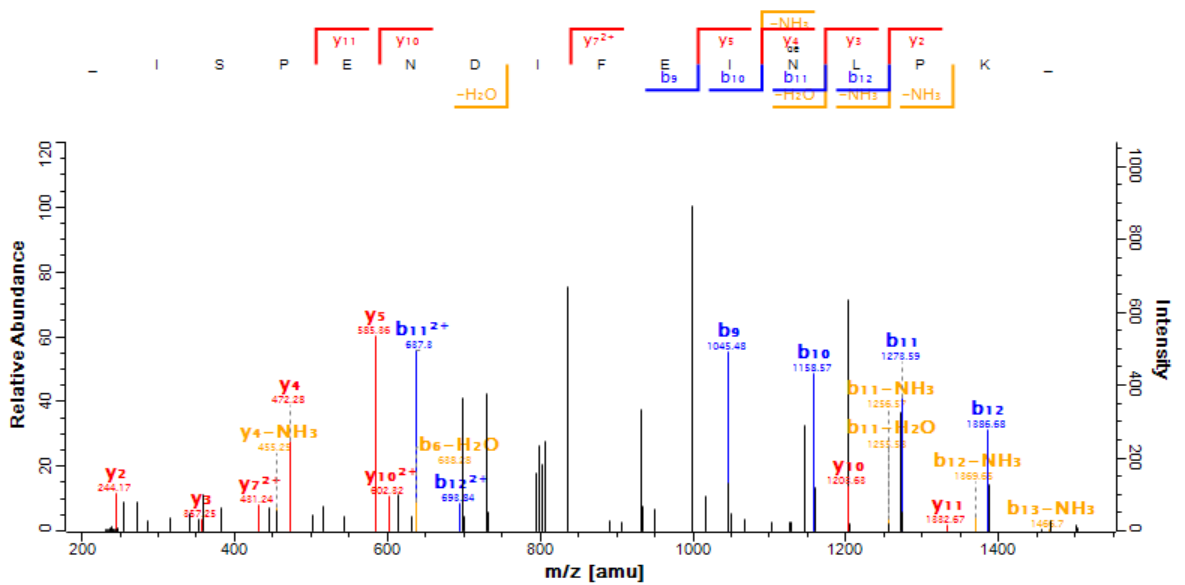

Supplement: supp_M114.041129_mcp.M114.041129-4.pdf [file supp_M114.041129_mcp.M114.041129-4.pdf]
