# Supplementary material
Source: PubMed Central journal article supplement (PMC4256481)

**Supplemental Fig. 5. Annotated spectra for single peptide identifications in the protein fractionation-free workflow in addition to those presented in supplemental Fig. 3.** Where multiple spectra match the peptide sequence, the annotated spectrum corresponding to the best match is reported.

**Protein Group ID:** 6  
**Protein Accession Numbers:** A1KXE4; A1KXE4-2  
**Gene Names:** FAM168B  
**Peptide Sequence:** MNPVYSPGSSGVYANAK  
**Total Number of Spectra:** 3  
**Number of Replicates (out of 8):** 2  
**Best Match Score:** 86.455  
**Best Match Posterior Error Probability:** 0.00074526  
**Best Match Spectrum:**

**Scan number** 47303      **Raw file** A549-US-Mock-top20CID-Elite-2ug-B13  
**Method** ITMS; CID      **Genenames** FAM168B

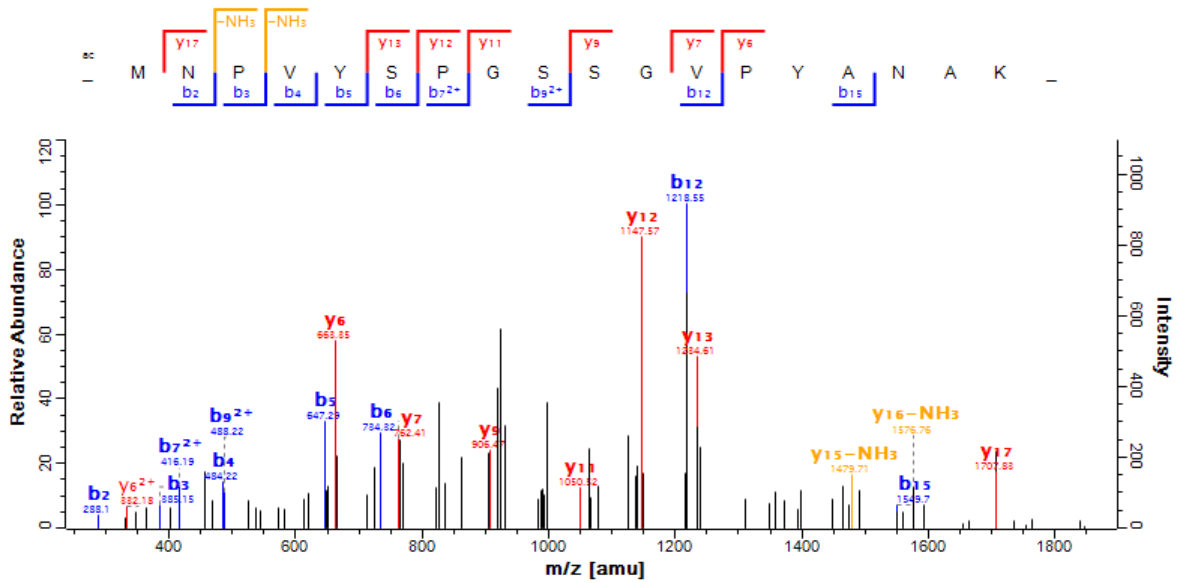

**Protein Group ID:** 9

**Protein Accession Numbers:** A1L3X0; D6RBM2; D6RBR5; D6RE10

**Gene Names:** ELOVL7

**Peptide Sequence:** TVHLYDNWIK

**Total Number of Spectra:** 4

**Number of Replicates (out of 8):** 4

**Best Match Score:** 207.83

**Best Match Posterior Error Probability:** 2.84E-19

**Best Match Spectrum:**

**Scan number** 44590      **Raw file** A549-US-WT-top20CID-Elite-2ug-B12  
**Method** ITMS; CID      **Genenames** ELOVL7

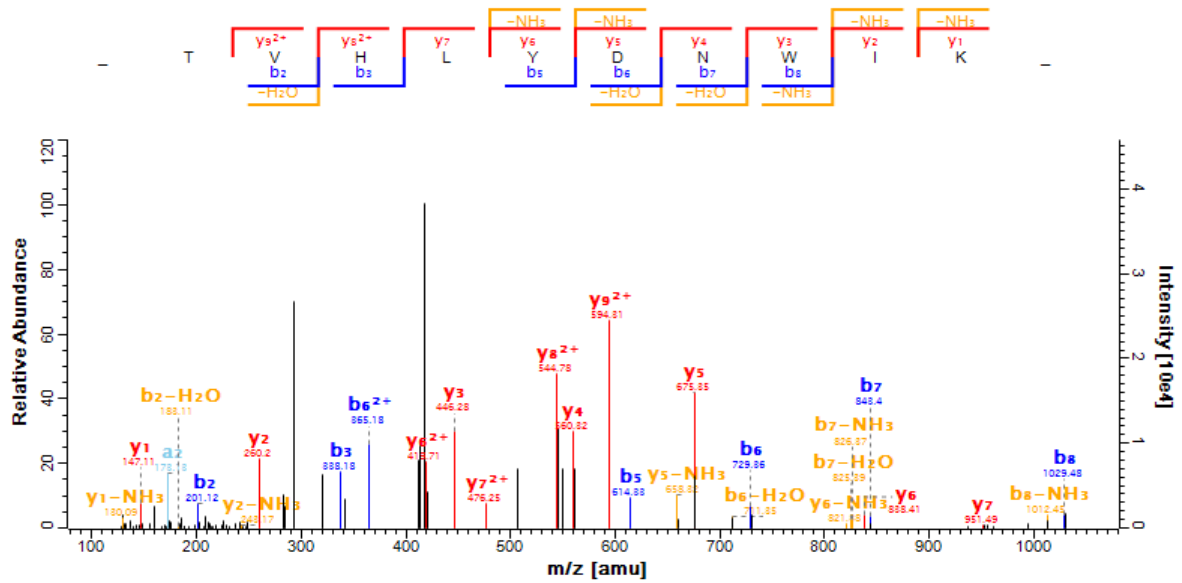

**Protein Group ID:** 24  
**Protein Accession Numbers:** Q13887; A2TJX0  
**Gene Names:** KLF5  
**Peptide Sequence:** LAIHNPNTLPTLPVNSQNIQPVR  
**Total Number of Spectra:** 1  
**Number of Replicates (out of 8):** 1  
**Best Match Score:** 62.966  
**Best Match Posterior Error Probability:** 0.0016494  
**Best Match Spectrum:**

**Scan number** 54133      **Raw file** A549-US-WT-top20CID-Elite-2ug-B14  
**Method** ITMS; CID      **Genenames** KLF5

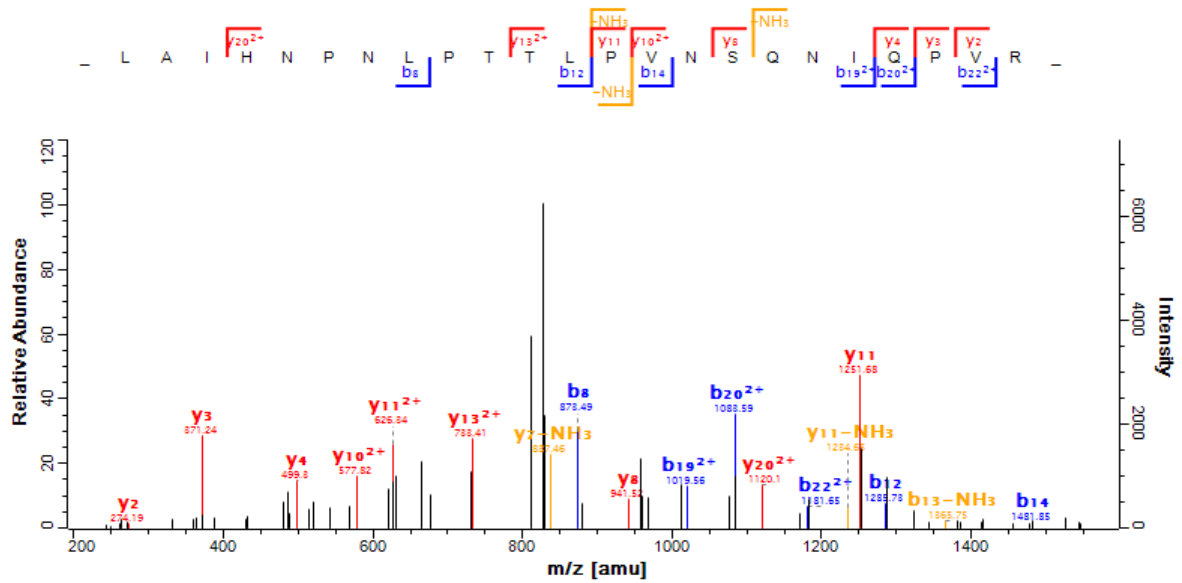



**Protein Group ID:** 29  
**Protein Accession Numbers:** A4D104; C9J7I0  
**Gene Names:** LOC401307  
**Peptide Sequence:** TSDIEANQPLETNK  
**Total Number of Spectra:** 7  
**Number of Replicates (out of 8):** 6  
**Best Match Score:** 133.48  
**Best Match Posterior Error Probability:** 4.32E-05  
**Best Match Spectrum:**

**Scan number** 18008      **Raw file** A549-US-WT-top20CID-Elite-2ug-B14  
**Method** ITMS; CID      **Genenames** LOC401307

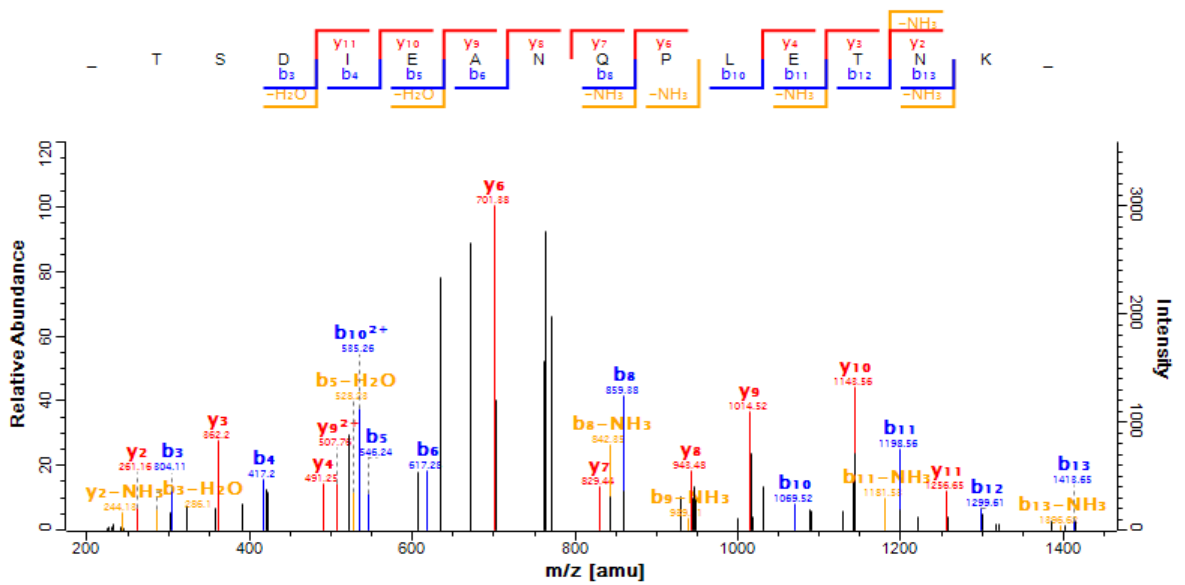

**Protein Group ID:** 34

**Protein Accession Numbers:** H0YE88; P28347; H0YEJ9; A4FUP2; E9PKB7

**Gene Names:** TEAD1

**Peptide Sequence:** ALQHMAAMSSAQIVSATAIHNK

**Total Number of Spectra:** 2

**Number of Replicates (out of 8):** 2

**Best Match Score:** 61.096

**Best Match Posterior Error Probability:** 0.0030914

**Best Match Spectrum:**

|                    |           |                  |                                     |
|--------------------|-----------|------------------|-------------------------------------|
| <b>Scan number</b> | 42005     | <b>Raw file</b>  | A549-US-Mock-top20CID-Elite-2ug-B14 |
| <b>Method</b>      | ITMS; CID | <b>Genenames</b> | TEAD1                               |

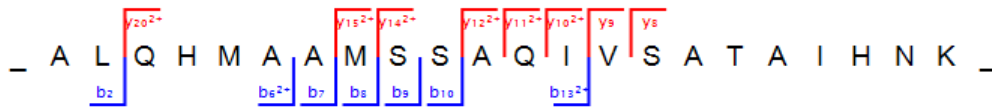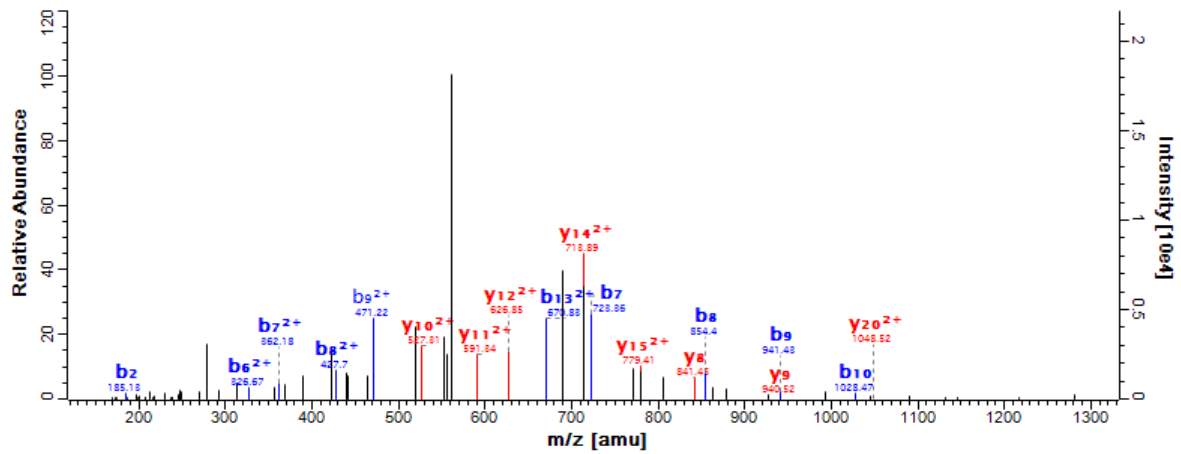

**Protein Group ID:** 35

**Protein Accession Numbers:** Q9UNL4; Q9UNL4-2; Q9UNL4-6; Q9UNL4-5; Q9UNL4-7; Q9UNL4-4; Q9UNL4-8; A4KYM5; E9PJ14

**Gene Names:** ING4

**Peptide Sequence:** AAGMYLEHLSIENLPLFELQR

**Total Number of Spectra:** 5

**Number of Replicates (out of 8):** 5

**Best Match Score:** 122.57

**Best Match Posterior Error Probability:** 1.25E-08

**Best Match Spectrum:**

|                    |           |                  |                                     |
|--------------------|-----------|------------------|-------------------------------------|
| <b>Scan number</b> | 94262     | <b>Raw file</b>  | A549-US-Mock-top20CID-Elite-2ug-B14 |
| <b>Method</b>      | ITMS; CID | <b>Genenames</b> | ING4                                |

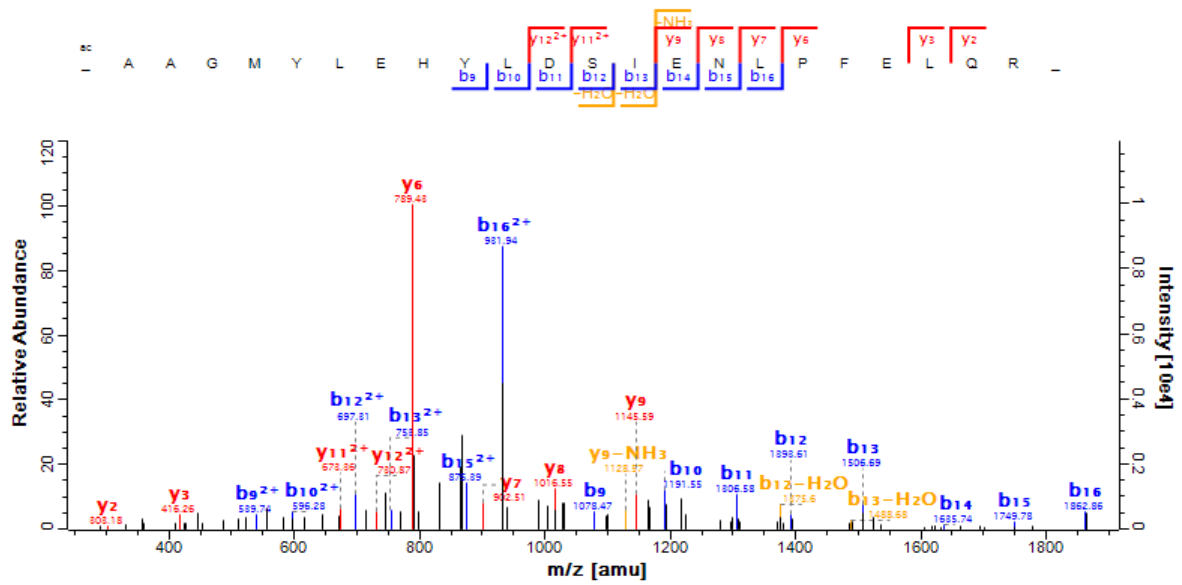

**Protein Group ID:** 41

**Protein Accession Numbers:** Q9Y5U2; Q9Y5U2-2; C9JJV1; C9JHT9; E9PME3; A6NCC9

**Gene Names:** TSSC4

**Peptide Sequence:** RAPSSVAHTSMSDNGGFK

**Total Number of Spectra:** 3

**Number of Replicates (out of 8):** 3

**Best Match Score:** 106.93

**Best Match Posterior Error Probability:** 0.00063748

**Best Match Spectrum:**

**Scan number** 15009      **Raw file** A549-US-WT-top20CID-Elite-2ug-B14  
**Method** ITMS; CID      **Genenames** TSSC4

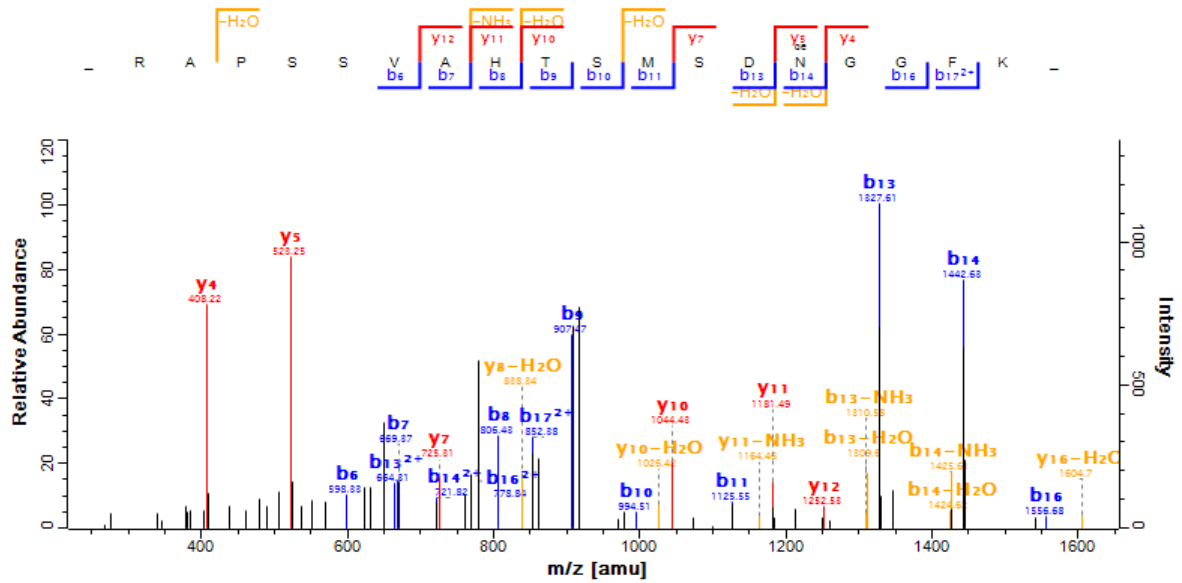

**Protein Group ID:** 42

**Protein Accession Numbers:** A6NCE7; Q9GZQ8; H3BTL1

**Gene Names:** MAP1LC3B2;MAP1LC3B

**Peptide Sequence:** FLVPDHVNS ELIK

**Total Number of Spectra:** 8

**Number of Replicates (out of 8):** 7

**Best Match Score:** 103.91

**Best Match Posterior Error Probability:** 0.0002713

**Best Match Spectrum:**

|                    |           |                  |                                     |
|--------------------|-----------|------------------|-------------------------------------|
| <b>Scan number</b> | 61760     | <b>Raw file</b>  | A549-US-Mock-top20CID-Elite-2ug-B11 |
| <b>Method</b>      | ITMS; CID | <b>Genenames</b> | MAP1LC3B2;MAP1LC3B                  |

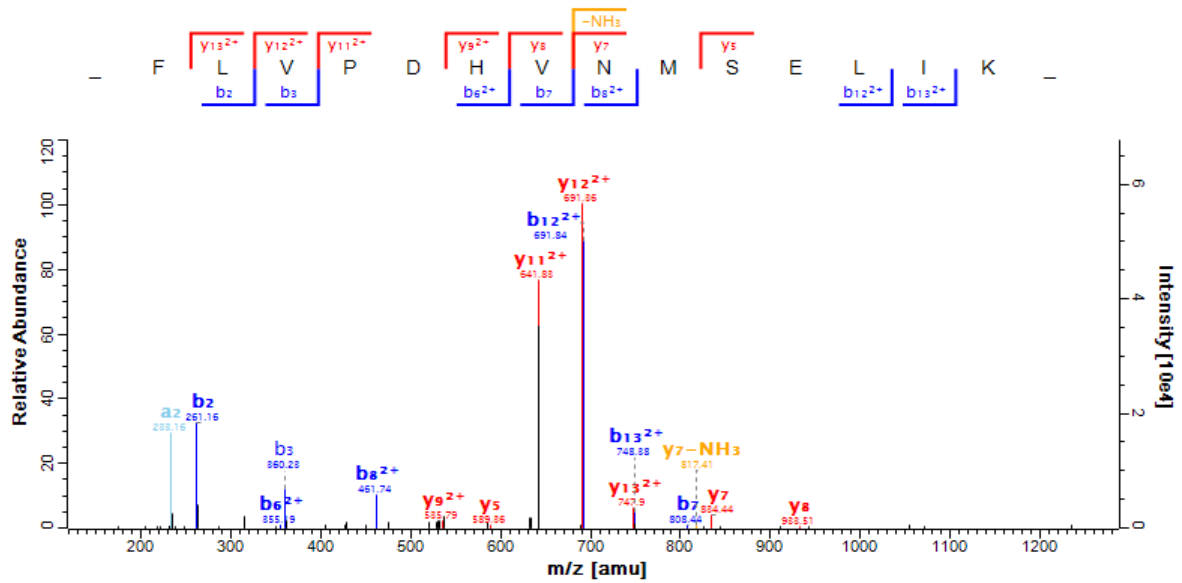

**Protein Group ID:** 43

**Protein Accession Numbers:** A6NCI0; Q9Y6G3; J3KPP0

**Gene Names:** MRPL42

**Peptide Sequence:** VEHLEEGPMIEQLSK

**Total Number of Spectra:** 6

**Number of Replicates (out of 8):** 5

**Best Match Score:** 156.17

**Best Match Posterior Error Probability:** 8.58E-08

**Best Match Spectrum:**

**Scan number** 41509      **Raw file** A549-US-WT-top20CID-Elite-2ug-B14  
**Method** ITMS; CID      **Genenames** MRPL42

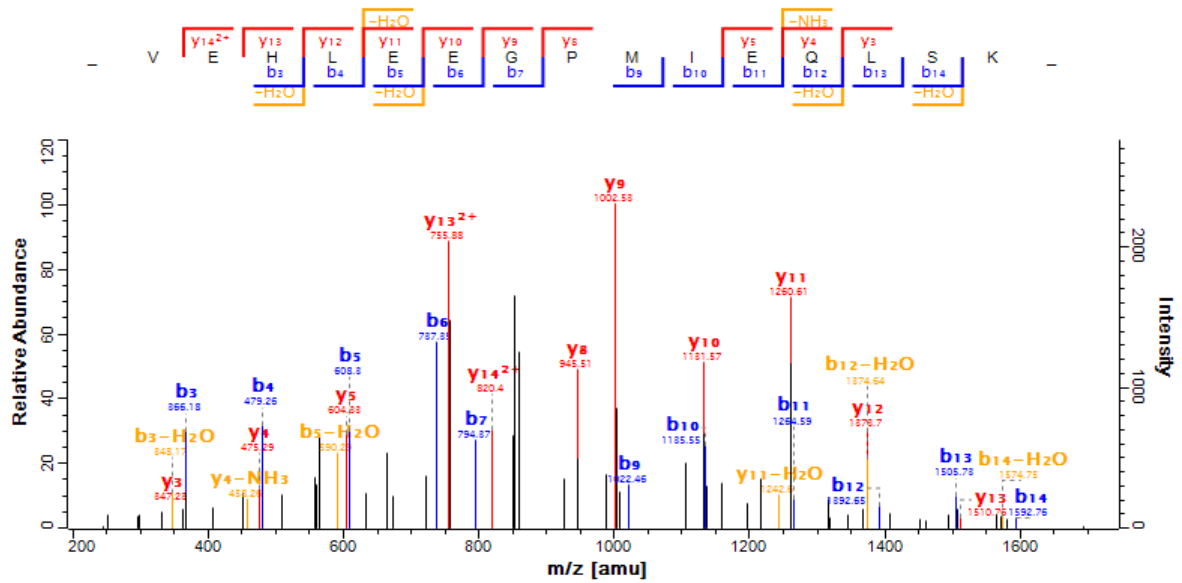

**Protein Group ID:** 44

**Protein Accession Numbers:** Q7LGA3; A6ND99; Q7LGA3-2; Q7LGA3-3; K7EP71

**Gene Names:** HS2ST1

**Peptide Sequence:** PGFYHGVSYLDFAK

**Total Number of Spectra:** 3

**Number of Replicates (out of 8):** 2

**Best Match Score:** 105.95

**Best Match Posterior Error Probability:** 0.00015957

**Best Match Spectrum:**

|                    |           |                  |                                   |
|--------------------|-----------|------------------|-----------------------------------|
| <b>Scan number</b> | 46120     | <b>Raw file</b>  | A549-US-WT-top20CID-Elite-2ug-811 |
| <b>Method</b>      | ITMS; CID | <b>Genenames</b> | HS2ST1                            |

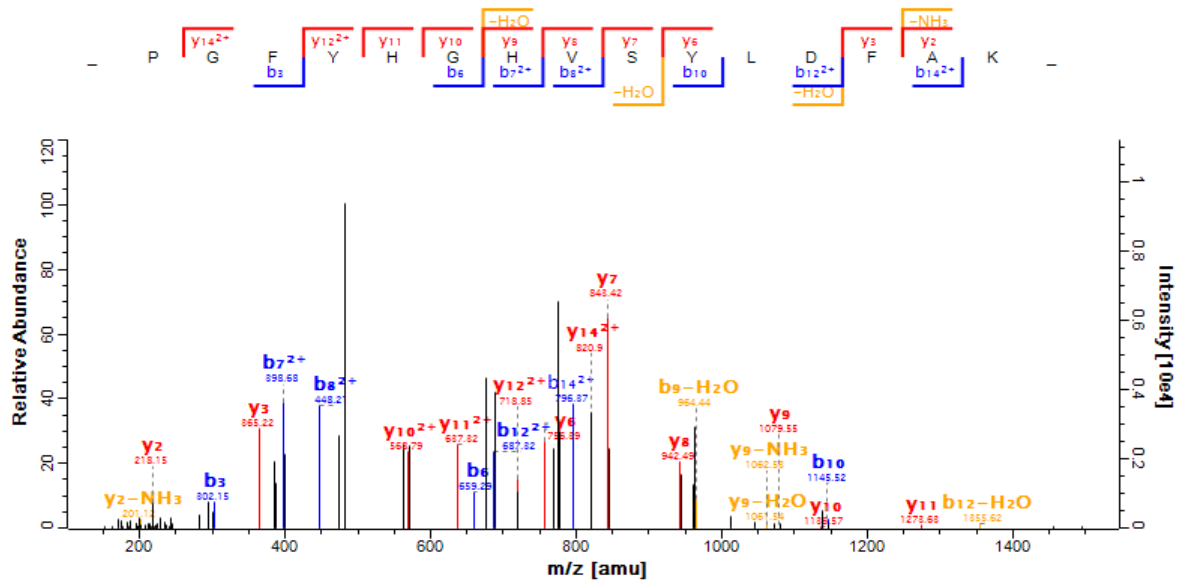

**Protein Group ID:** 46  
**Protein Accession Numbers:** A6NDU8  
**Gene Names:** C5orf51  
**Peptide Sequence:** AAAVSSVVR  
**Total Number of Spectra:** 2  
**Number of Replicates (out of 8):** 2  
**Best Match Score:** 109.29  
**Best Match Posterior Error Probability:** 0.0014792  
**Best Match Spectrum:**

**Scan number** 35375      **Raw file** A549-US-Mock-top20CID-Elite-2ug-B14  
**Method** ITMS; CID      **Genenames** C5orf51

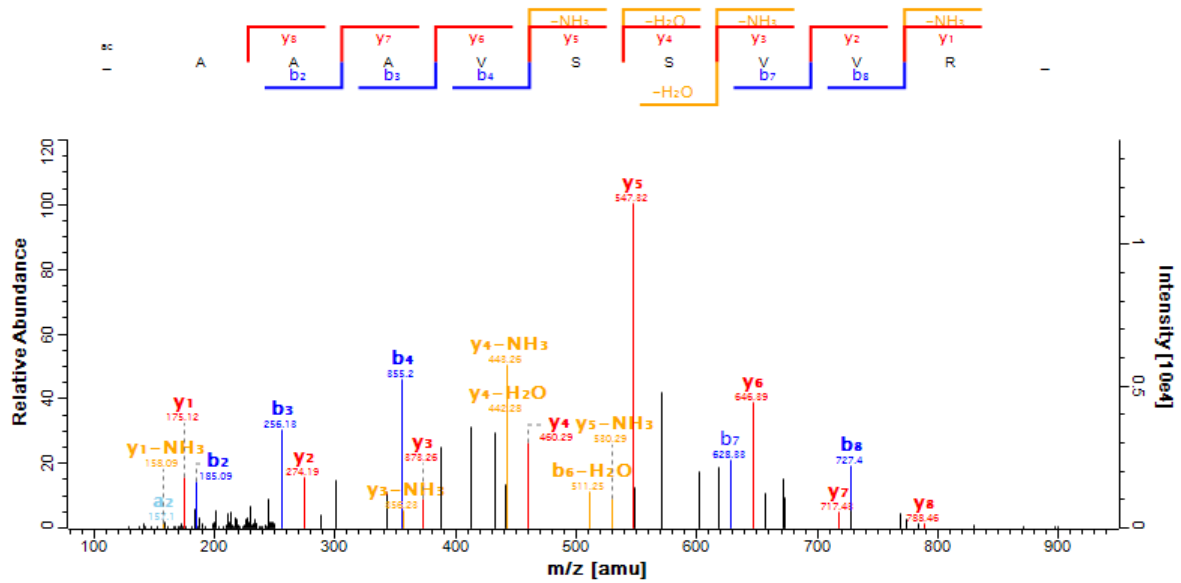



**Protein Group ID:** 51

**Protein Accession Numbers:** P45983; P45983-4; P45983-2; P45983-3; Q308M2; A6NF29; C9J762

**Gene Names:** MAPK8

**Peptide Sequence:** NIIGLLNVFTPQK

**Total Number of Spectra:** 2

**Number of Replicates (out of 8):** 2

**Best Match Score:** 162.72

**Best Match Posterior Error Probability:** 1.68E-09

**Best Match Spectrum:**

**Scan number** 83355      **Raw file** A549-US-Mock-top20CID-Elite-2ug-B12  
**Method** ITMS; CID      **Genenames** MAPK8

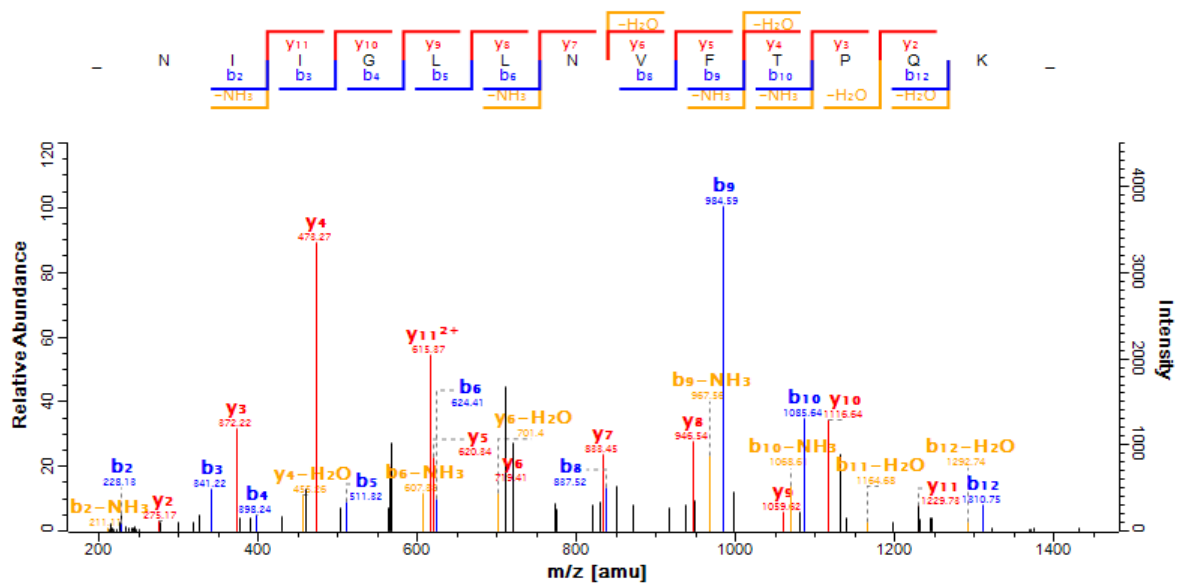

**Protein Group ID: 55**

**Protein Accession Numbers: A6NFV8; Q96EV8; Q96EV8-2; D6RCT8; D6RAX1**

**Gene Names: DTNBP1**

**Peptide Sequence: LLSVQQDFTSGLK**

**Total Number of Spectra: 1**

**Number of Replicates (out of 8): 1**

**Best Match Score: 97.463**

**Best Match Posterior Error Probability: 0.00066916**

**Best Match Spectrum:**

**Scan number** 51124      **Raw file** A549-US-Mock-top20CID-Elite-2ug-B14  
**Method** ITMS; CID      **Genenames** DTNBP1

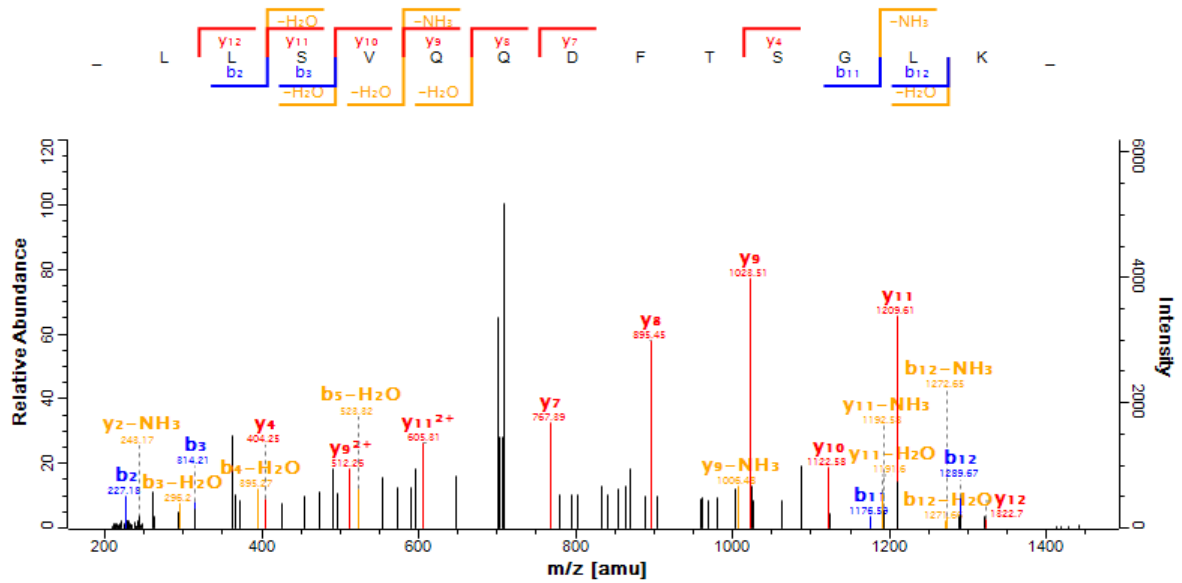

**Protein Group ID:** 60  
**Protein Accession Numbers:** A6NGJ0; P51808  
**Gene Names:** DYNLT3  
**Peptide Sequence:** HCDEVGFNAEEAHNIVK  
**Total Number of Spectra:** 4  
**Number of Replicates (out of 8):** 4  
**Best Match Score:** 139.66  
**Best Match Posterior Error Probability:** 3.90E-05  
**Best Match Spectrum:**

**Scan number** 31442      **Raw file** A549-US-Mock-top20CID-Elite-2ug-B14  
**Method** ITMS; CID      **Genenames** DYNLT3

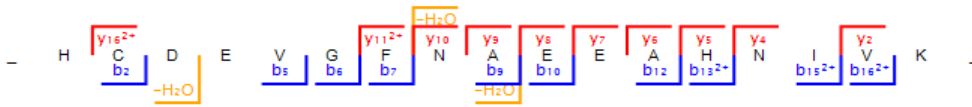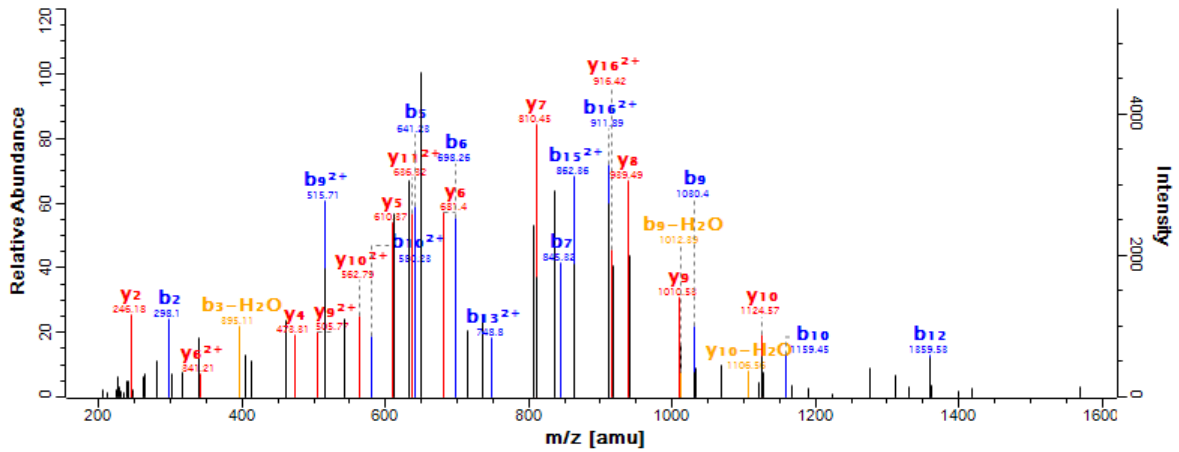

**Protein Group ID:** 62  
**Protein Accession Numbers:** A6NGX9; O75038-5  
**Gene Names:** PLCH2  
**Peptide Sequence:** MGAMQEGMQMKLR  
**Total Number of Spectra:** 1  
**Number of Replicates (out of 8):** 1  
**Best Match Score:** 68.676  
**Best Match Posterior Error Probability:** 0.0053147  
**Best Match Spectrum:**

**Scan number** 37851      **Raw file** A549-US-Mock-top20CID-Elite-2ug-B11  
**Method** ITMS; CID      **Genenames** PLCH2

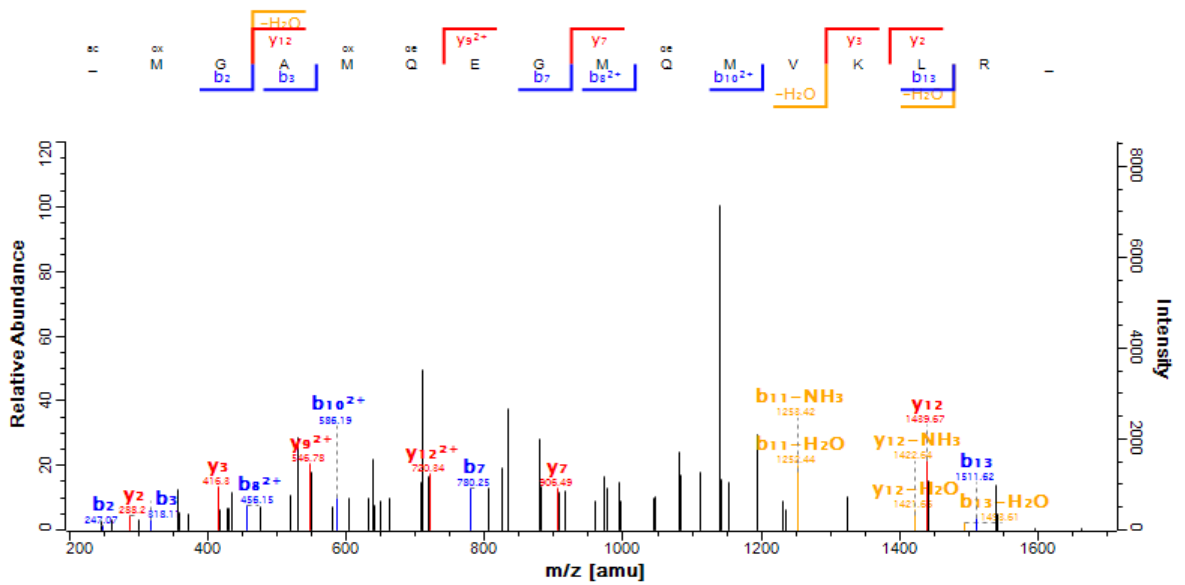

**Protein Group ID:** 63  
**Protein Accession Numbers:** A6NHL2; A6NHL2-2  
**Gene Names:** TUBAL3  
**Peptide Sequence:** SFGGGTGSFGFTSLLMER  
**Total Number of Spectra:** 6  
**Number of Replicates (out of 8):** 6  
**Best Match Score:** 132.47  
**Best Match Posterior Error Probability:** 8.22E-05  
**Best Match Spectrum:**

**Scan number** 65109      **Raw file** A549-US-WT-top20CID-Elite-2ug-B13  
**Method** ITMS; CID      **Genenames** TUBAL3

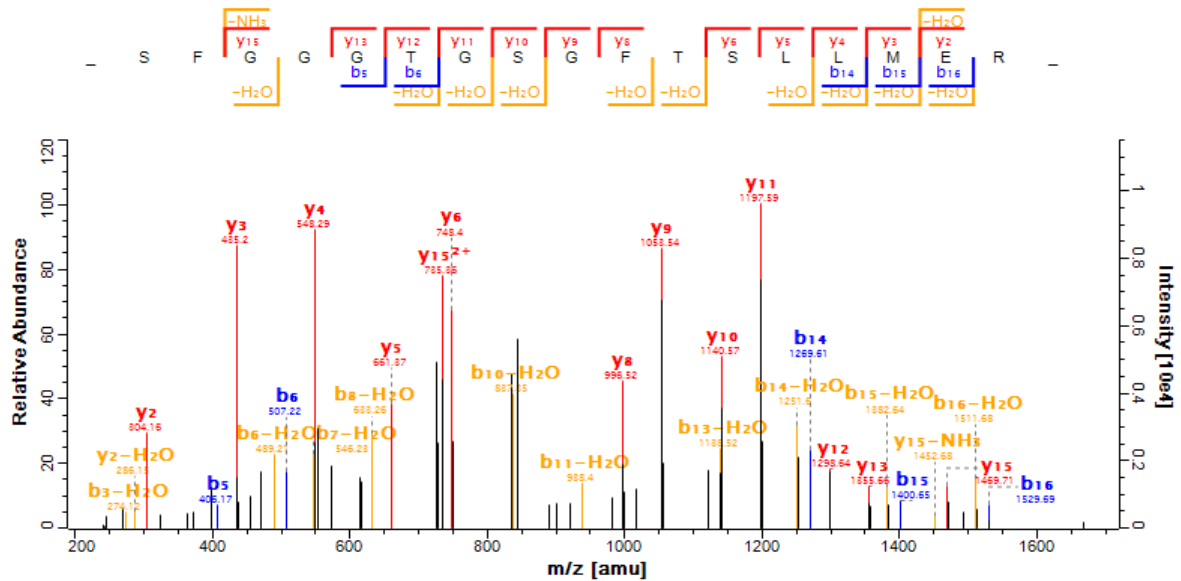

**Protein Group ID:** 64  
**Protein Accession Numbers:** A6NHQ2  
**Gene Names:** FBLL1  
**Peptide Sequence:** TNIPVLEDAR  
**Total Number of Spectra:** 5  
**Number of Replicates (out of 8):** 5  
**Best Match Score:** 98.902  
**Best Match Posterior Error Probability:** 0.00055543  
**Best Match Spectrum:**

**Scan number** 48555      **Raw file** A549-US-WT-top20CID-Elite-2ug-B11  
**Method** ITMS; CID      **Genenames** FBLL1

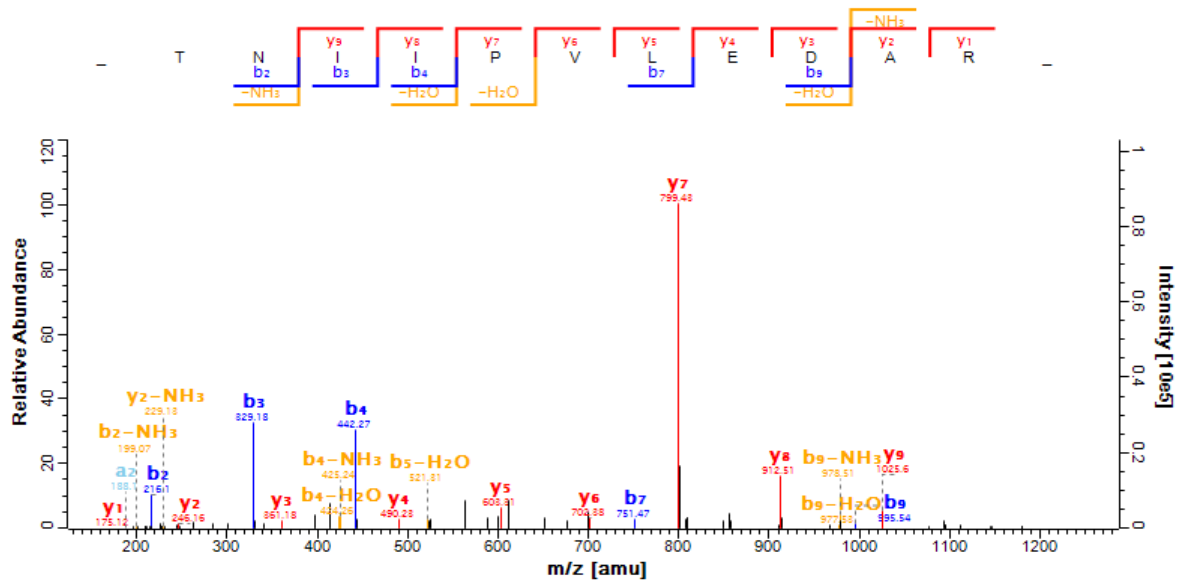

**Protein Group ID:** 66  
**Protein Accession Numbers:** A6NHX0  
**Gene Names:** GATSL2  
**Peptide Sequence:** ESIPLFYGLIK  
**Total Number of Spectra:** 2  
**Number of Replicates (out of 8):** 2  
**Best Match Score:** 102.4  
**Best Match Posterior Error Probability:** 0.00045333  
**Best Match Spectrum:**

**Scan number** 74712      **Raw file** A549-US-Mock-top20CID-Elite-2ug-B13  
**Method** ITMS; CID      **Genenames** GATSL2

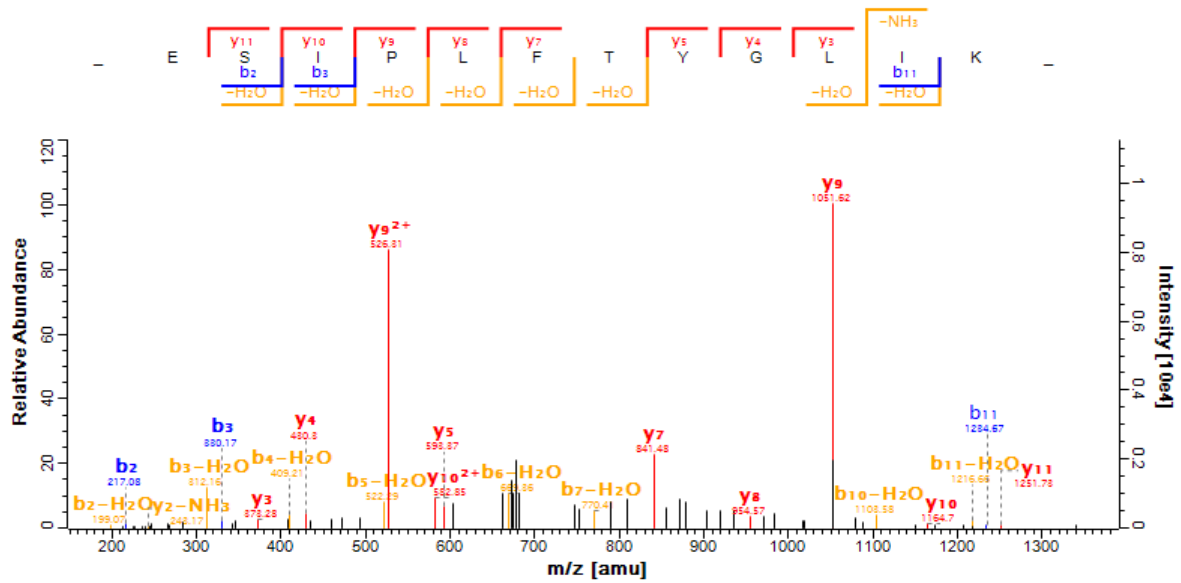

**Protein Group ID:** 70

**Protein Accession Numbers:** Q9GZM8-2; Q9NXR1; Q9GZM8; Q9NXR1-2; J3QT32; A6NIZ0; J3QRZ1; J3QSD2; I3L522; I3L2R9; I3L533; I3L2T8; I3L2R3

**Gene Names:** NDE1;NDEL1

**Peptide Sequence:** ISALNIVGDLLR

**Total Number of Spectra:** 4

**Number of Replicates (out of 8):** 4

**Best Match Score:** 151.99

**Best Match Posterior Error Probability:** 2.85E-06

**Best Match Spectrum:**

|                    |           |                  |                                   |
|--------------------|-----------|------------------|-----------------------------------|
| <b>Scan number</b> | 88294     | <b>Raw file</b>  | A549-US-WT-top20CID-Elite-2ug-B12 |
| <b>Method</b>      | ITMS: CID | <b>Genenames</b> | NDE1;NDEL1                        |

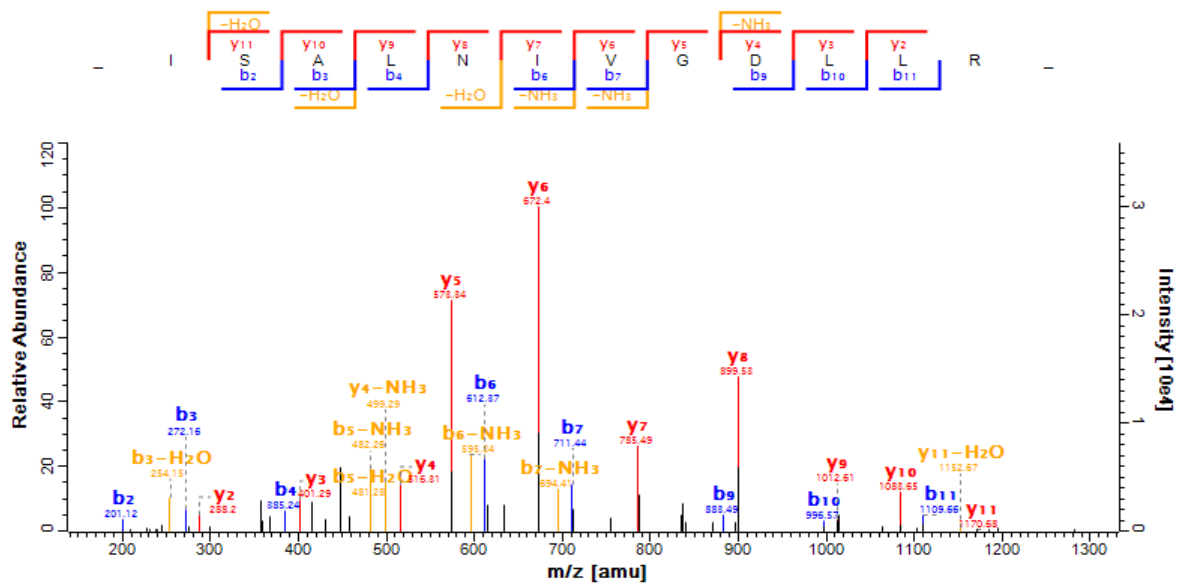



**Protein Group ID:** 75

**Protein Accession Numbers:** J3KNE0; A6NKT7; J3KKNY6; Q7Z3J3

**Gene Names:** RGPD3;RGPD4

**Peptide Sequence:** ILDDSDSNLSVVK

**Total Number of Spectra:** 11

**Number of Replicates (out of 8):** 8

**Best Match Score:** 178.67

**Best Match Posterior Error Probability:** 2.30E-14

**Best Match Spectrum:**

**Scan number** 30795      **Raw file** A549-US-Mock-top20CID-Elite-2ug-B14  
**Method** ITMS; CID      **Genenames** RGPD3;RGPD4

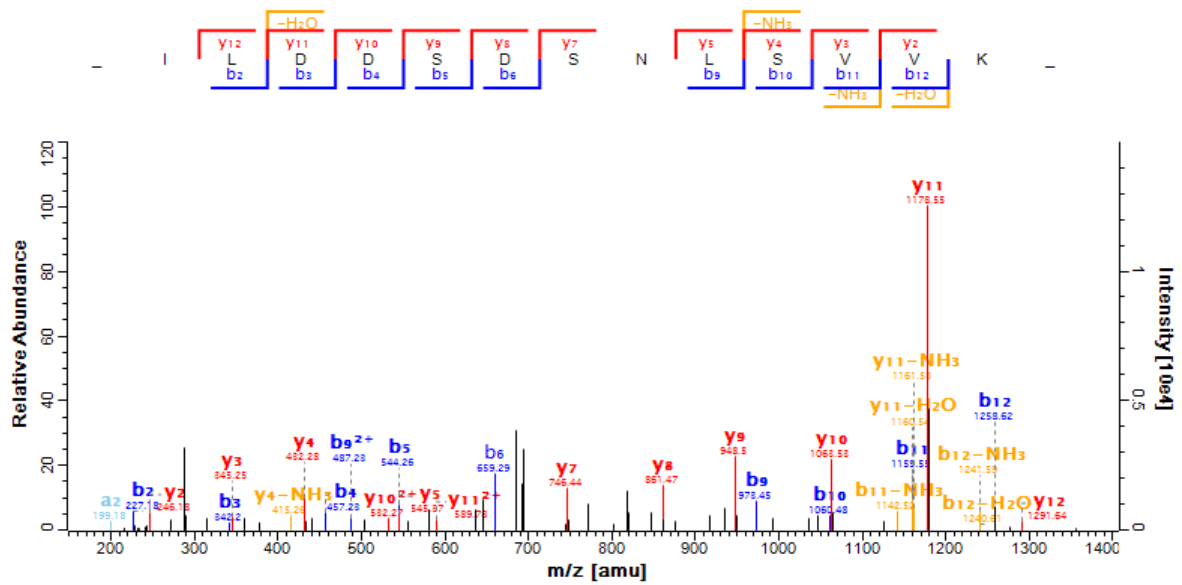

**Protein Group ID:** 77

**Protein Accession Numbers:** Q8IY57; A6NL56; J3KNM5; Q8IY57-2; Q8IY57-3

**Gene Names:** YAF2

**Peptide Sequence:** SPPASSAASADQHSQSGSSSDNTER

**Total Number of Spectra:** 7

**Number of Replicates (out of 8):** 5

**Best Match Score:** 94.837

**Best Match Posterior Error Probability:** 5.28E-06

**Best Match Spectrum:**

**Scan number** 3272      **Raw file** A549-US-WT-top20CID-Elite-2ug-B11  
**Method** ITMS; CID      **Genenames** YAF2

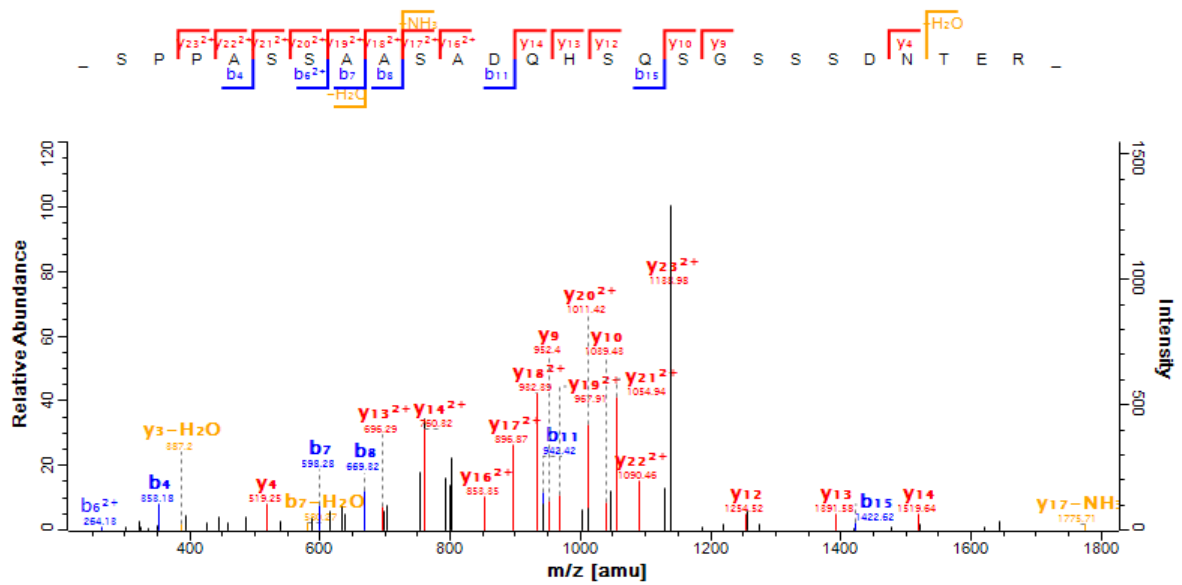

**Protein Group ID:** 78  
**Protein Accession Numbers:** Q9P003; A6NLH6  
**Gene Names:** CNIH4  
**Peptide Sequence:** YIMVPSGNMGVFDPTIHN R  
**Total Number of Spectra:** 1  
**Number of Replicates (out of 8):** 1  
**Best Match Score:** 137.61  
**Best Match Posterior Error Probability:** 1.03E-06  
**Best Match Spectrum:**

**Scan number** 60907      **Raw file** A549-US-Mock-top20CID-Elite-2ug-B12  
**Method** ITMS; CID      **Genenames** CNIH4

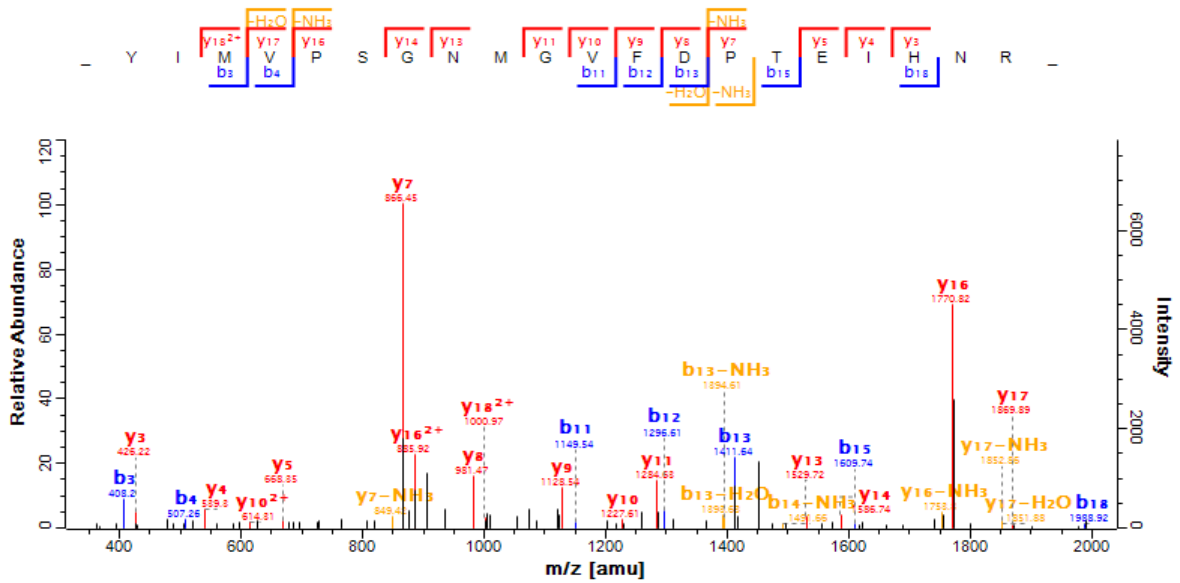

**Protein Group ID:** 86  
**Protein Accession Numbers:** P60604; A6NMQ7  
**Gene Names:** UBE2G2  
**Peptide Sequence:** VCISILHAPGGDDPMGYESSASAEER  
**Total Number of Spectra:** 10  
**Number of Replicates (out of 8):** 8  
**Best Match Score:** 112.55  
**Best Match Posterior Error Probability:** 3.44E-07  
**Best Match Spectrum:**

**Scan number** 53052      **Raw file** A549-US-WT-top20CID-Elite-2ug-B14  
**Method** ITMS; CID      **Genenames** UBE2G2

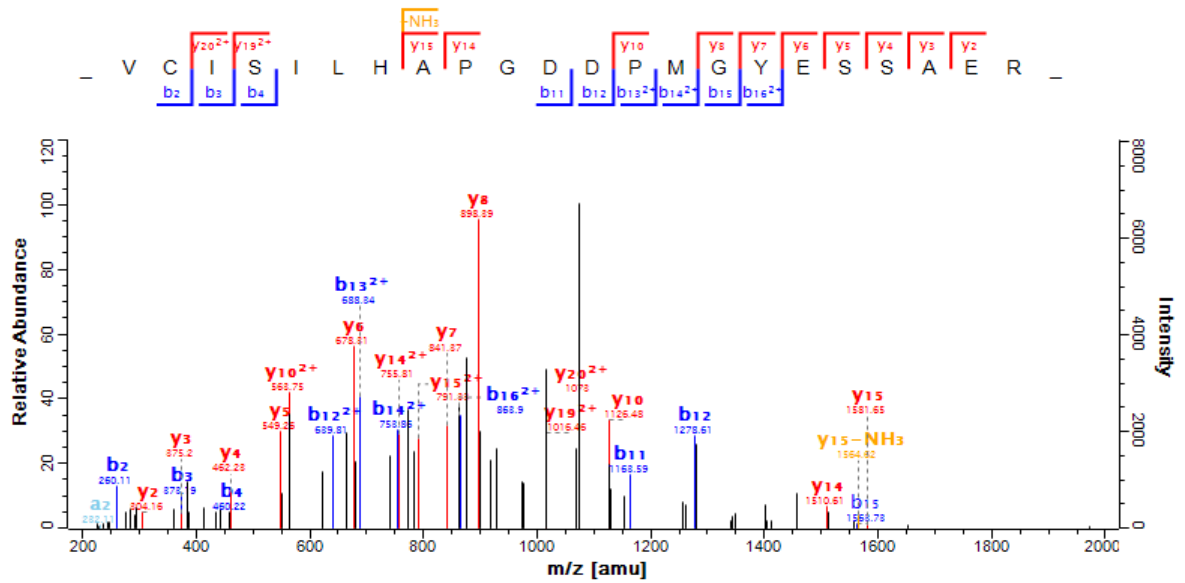

**Protein Group ID:** 87  
**Protein Accession Numbers:** A6NMY6  
**Gene Names:** ANXA2P2  
**Peptide Sequence:** GDLENAFLNLVQRIQNK  
**Total Number of Spectra:** 1  
**Number of Replicates (out of 8):** 1  
**Best Match Score:** 115.06  
**Best Match Posterior Error Probability:** 0.0063144  
**Best Match Spectrum:**

**Scan number** 92185      **Raw file** A549-US-WT-top20CID-Elite-2ug-B14  
**Method** ITMS; CID      **Genenames** ANXA2P2

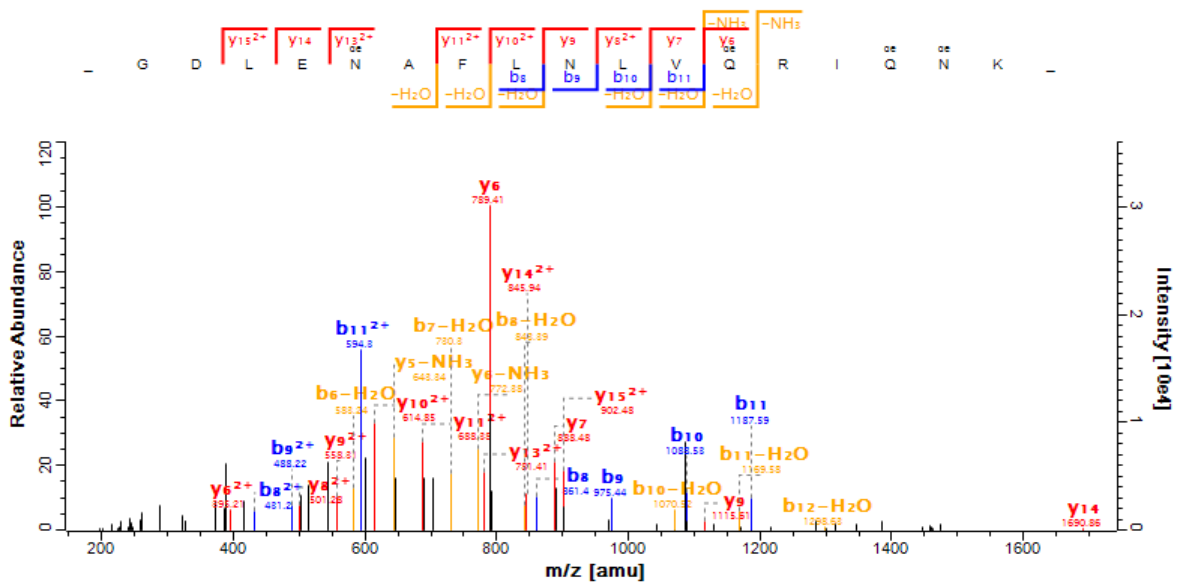

**Protein Group ID:** 91

**Protein Accession Numbers:** P24001; F8VSD2; F8VVN4; F8W1V1; E9PIV2; P24001-2; A6NNM0; P24001-3; P24001-5; E9PK07; P24001-4

**Gene Names:** IL32

**Peptide Sequence:** EGYLETVAAYYEEQHPELTPLEEK

**Total Number of Spectra:** 1

**Number of Replicates (out of 8):** 1

**Best Match Score:** 68.639

**Best Match Posterior Error Probability:** 0.00059479

**Best Match Spectrum:**

|                    |           |                  |                                   |
|--------------------|-----------|------------------|-----------------------------------|
| <b>Scan number</b> | 81206     | <b>Raw file</b>  | A549-US-WT-top20CID-Elite-2ug-B13 |
| <b>Method</b>      | ITMS; CID | <b>Genenames</b> | IL32                              |

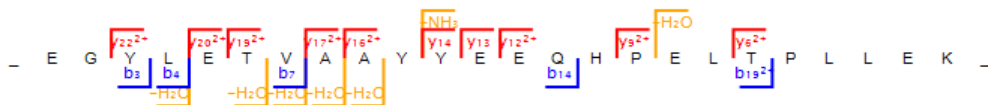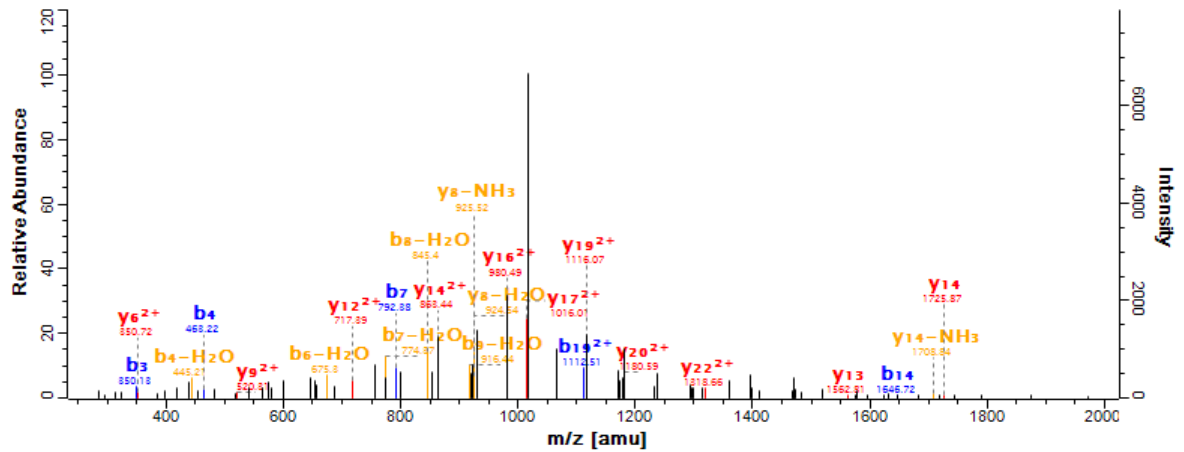

**Protein Group ID:** 93  
**Protein Accession Numbers:** O60831; A6NP52  
**Gene Names:** PRAF2  
**Peptide Sequence:** ALDDFVLGSAR  
**Total Number of Spectra:** 2  
**Number of Replicates (out of 8):** 1  
**Best Match Score:** 125.97  
**Best Match Posterior Error Probability:** 4.33E-05  
**Best Match Spectrum:**

**Scan number** 49115      **Raw file** A549-US-Mock-top20CID-Elite-2ug-B12  
**Method** ITMS; CID      **Genenames** PRAF2

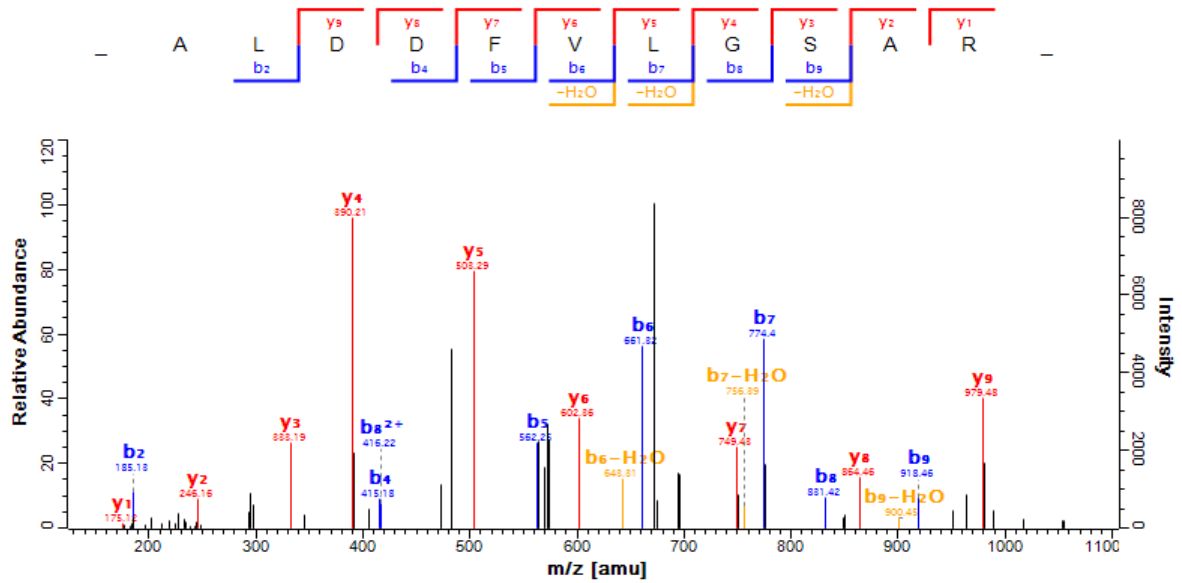

**Protein Group ID:** 95

**Protein Accession Numbers:** Q6UXH1-5; Q6UXH1-6; Q6UXH1; Q6UXH1-4; Q6UXH1-2; Q6UXH1-3; A6PWM2

**Gene Names:** CRELD2

**Peptide Sequence:** NFGGGNTAWEK

**Total Number of Spectra:** 7

**Number of Replicates (out of 8):** 7

**Best Match Score:** 135.02

**Best Match Posterior Error Probability:** 8.76E-05

**Best Match Spectrum:**

|                    |           |                  |                                   |
|--------------------|-----------|------------------|-----------------------------------|
| <b>Scan number</b> | 24552     | <b>Raw file</b>  | A549-US-WT-top20CID-Elite-2ug-B11 |
| <b>Method</b>      | ITMS; CID | <b>Genenames</b> | CRELD2                            |

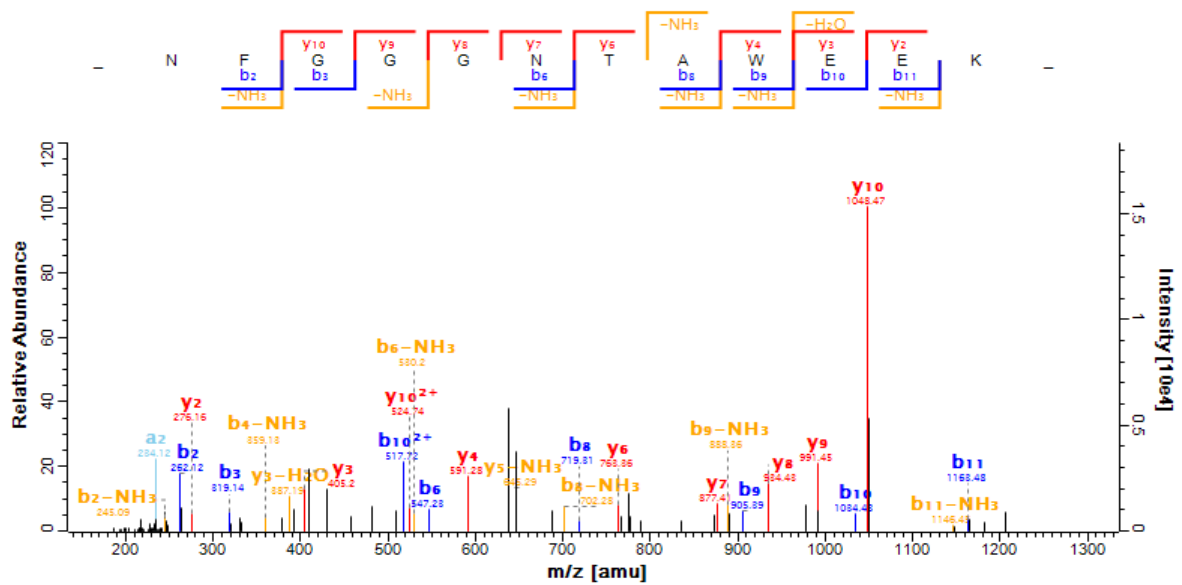



**Protein Group ID:** 96

**Protein Accession Numbers:** A6ZKI3; Q17RB0; Q9BWD3

**Gene Names:** FAM127A;FAM127C;FAM127B

**Peptide Sequence:** RVFGWEEEDF

**Total Number of Spectra:** 3

**Number of Replicates (out of 8):** 3

**Best Match Score:** 119.27

**Best Match Posterior Error Probability:** 0.00015874

**Best Match Spectrum:**

**Scan number** 54901      **Raw file** A549-US-Mock-top20CID-Elite-2ug-B12  
**Method** ITMS; CID      **Genenames** FAM127A;FAM127C;FAM127B

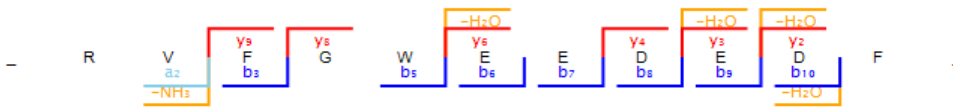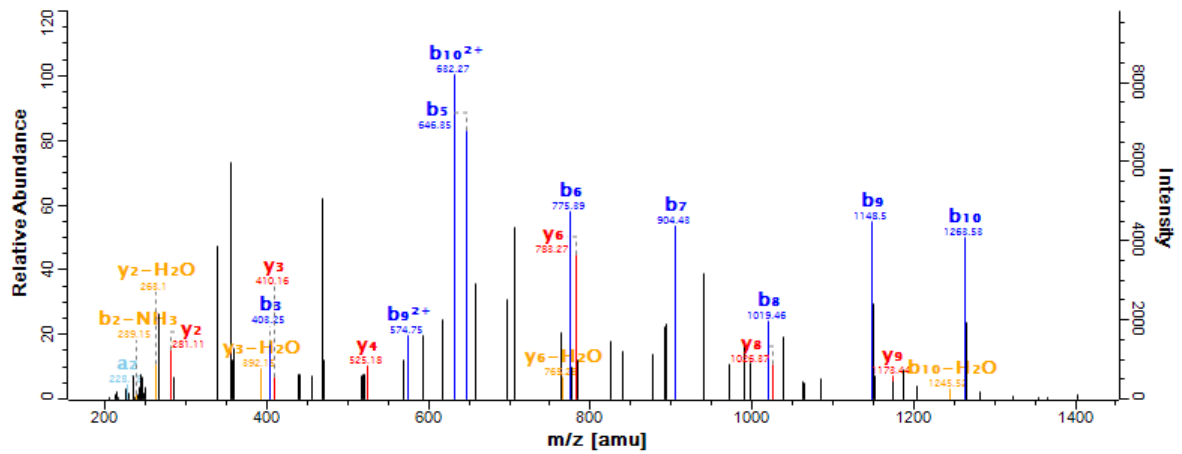

**Protein Group ID:** 99

**Protein Accession Numbers:** A8CTX8; A8CTY3; B4DTM2; E7ERJ0; Q15811-3; E7ERJ1; A7Y322; A8DCP3

**Gene Names:** ITSN1

**Peptide Sequence:** SHDEITIQPGDIVMVD E S Q T G E P G W L G G E L K

**Total Number of Spectra:** 1

**Number of Replicates (out of 8):** 1

**Best Match Score:** 80.439

**Best Match Posterior Error Probability:** 1.97E-06

**Best Match Spectrum:**

|                    |           |                  |                                     |
|--------------------|-----------|------------------|-------------------------------------|
| <b>Scan number</b> | 73820     | <b>Raw file</b>  | A549-US-Mock-top20CID-Elite-2ug-B11 |
| <b>Method</b>      | ITMS: CID | <b>Genenames</b> | ITSN1                               |

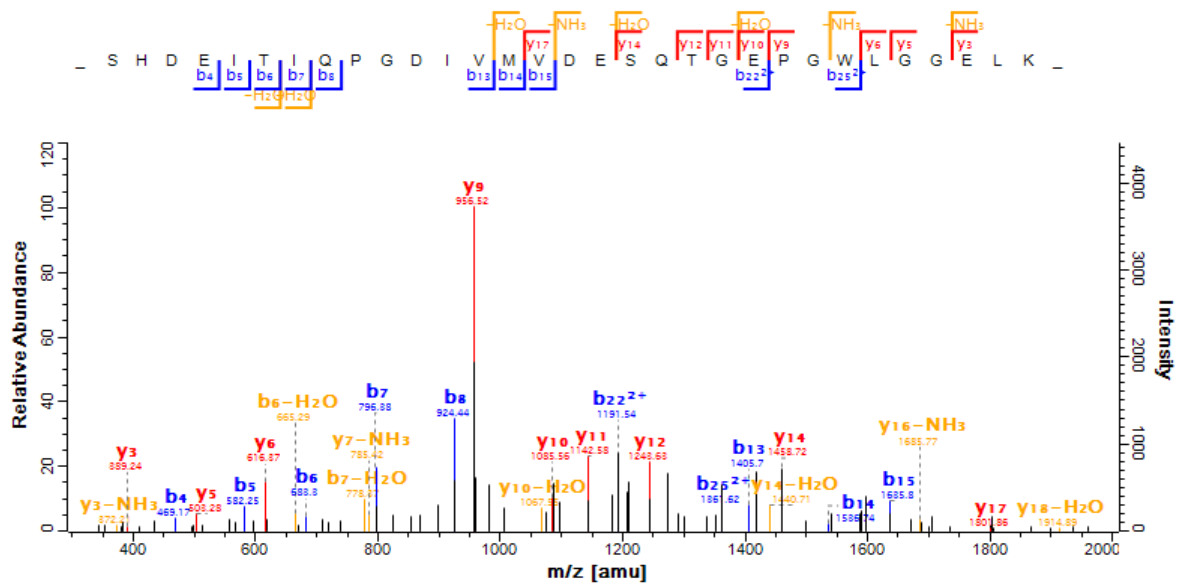

**Protein Group ID:** 102

**Protein Accession Numbers:** Q9Y6D0; A8K0M9; F8WAX7

**Gene Names:** SELK

**Peptide Sequence:** VYISNGQVLDSR

**Total Number of Spectra:** 1

**Number of Replicates (out of 8):** 1

**Best Match Score:** 113.99

**Best Match Posterior Error Probability:** 0.0010492

**Best Match Spectrum:**

|                    |           |                  |                                   |
|--------------------|-----------|------------------|-----------------------------------|
| <b>Scan number</b> | 32617     | <b>Raw file</b>  | A549-US-WT-top20CID-Elite-2ug-813 |
| <b>Method</b>      | ITMS; CID | <b>Genenames</b> | SELK                              |

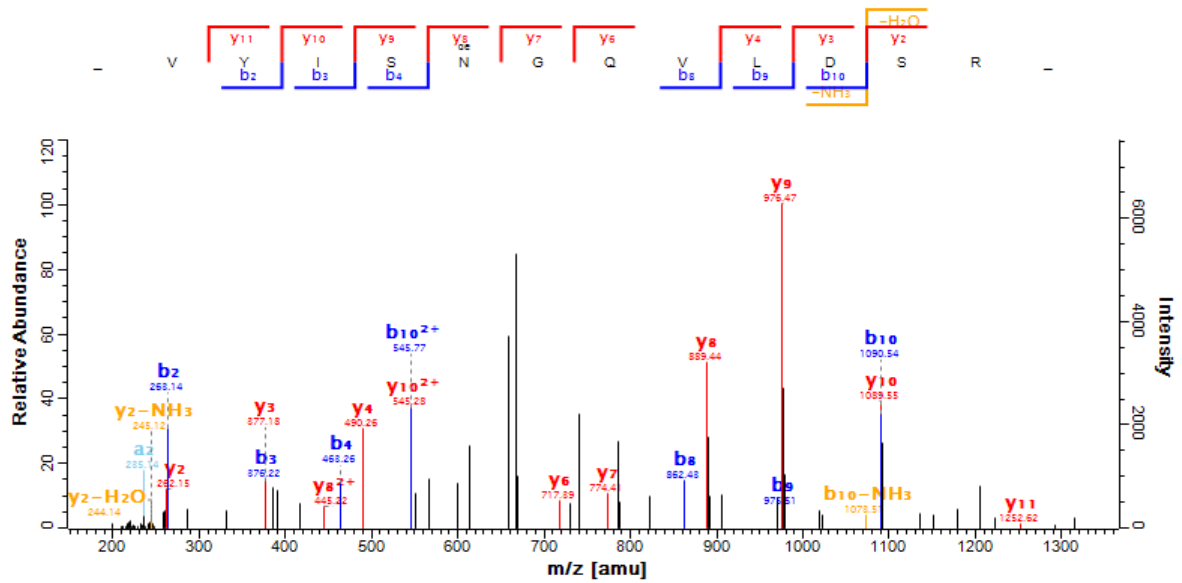

**Protein Group ID:** 105

**Protein Accession Numbers:** I3L448; Q5TC12; A8MRA7; I3L1W9; B7Z7I6; H0YD21; B7Z7D6; H0YEW4

**Gene Names:** ATPAF1

**Peptide Sequence:** YMSVIAELEQSGGLGAE LK

**Total Number of Spectra:** 6

**Number of Replicates (out of 8):** 6

**Best Match Score:** 147.7

**Best Match Posterior Error Probability:** 9.50E-07

**Best Match Spectrum:**

**Scan number** 83879      **Raw file** A549-US-Mock-top20CID-Elite-2ug-B14  
**Method** ITMS: CID      **Genenames** ATPAF1

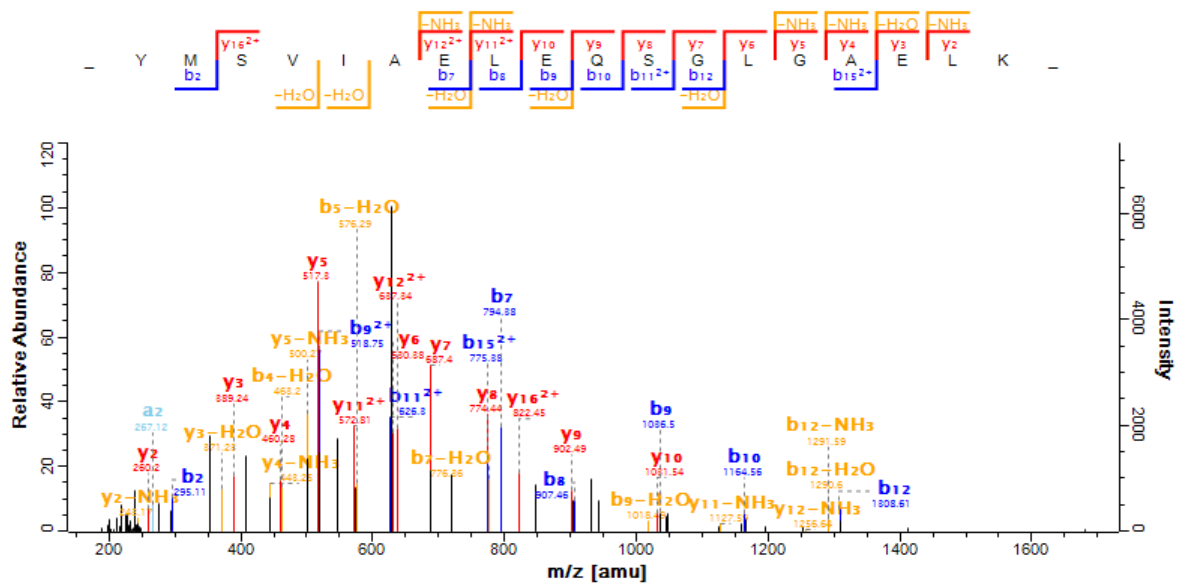

**Protein Group ID:** 122

**Protein Accession Numbers:** P53801; A8MXQ1; A8MZH8

**Gene Names:** PTTG1IP

**Peptide Sequence:** ACLDYPVTSVLPPASLCK

**Total Number of Spectra:** 1

**Number of Replicates (out of 8):** 1

**Best Match Score:** 85.362

**Best Match Posterior Error Probability:** 0.00064535

**Best Match Spectrum:**

|                    |           |                  |                                   |
|--------------------|-----------|------------------|-----------------------------------|
| <b>Scan number</b> | 62605     | <b>Raw file</b>  | A549-US-WT-top20CID-Elite-2ug-B14 |
| <b>Method</b>      | ITMS; CID | <b>Genenames</b> | PTTG1IP                           |

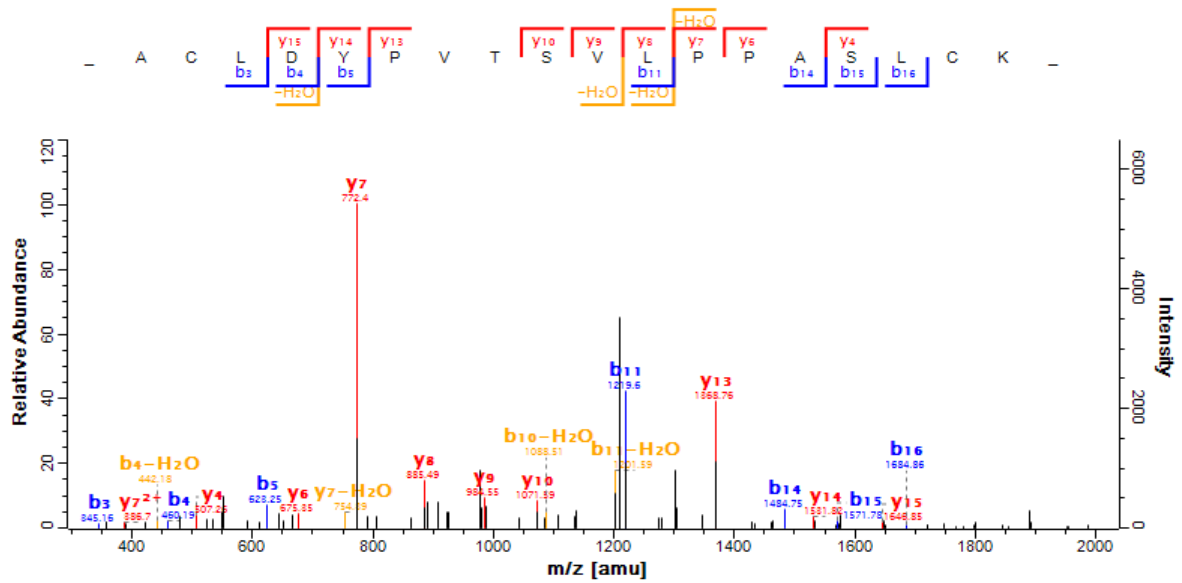

**Protein Group ID:** 125

**Protein Accession Numbers:** O14874; A8MY43; Q96G95; H3BS02; H3BTL2

**Gene Names:** BCKDK

**Peptide Sequence:** DVVTLLAEGLR

**Total Number of Spectra:** 1

**Number of Replicates (out of 8):** 1

**Best Match Score:** 144.1

**Best Match Posterior Error Probability:** 1.35E-05

**Best Match Spectrum:**

|                    |           |                  |                                     |
|--------------------|-----------|------------------|-------------------------------------|
| <b>Scan number</b> | 72566     | <b>Raw file</b>  | A549-US-Mock-top20CID-Elite-2ug-B13 |
| <b>Method</b>      | ITMS; CID | <b>Genenames</b> | BCKDK                               |

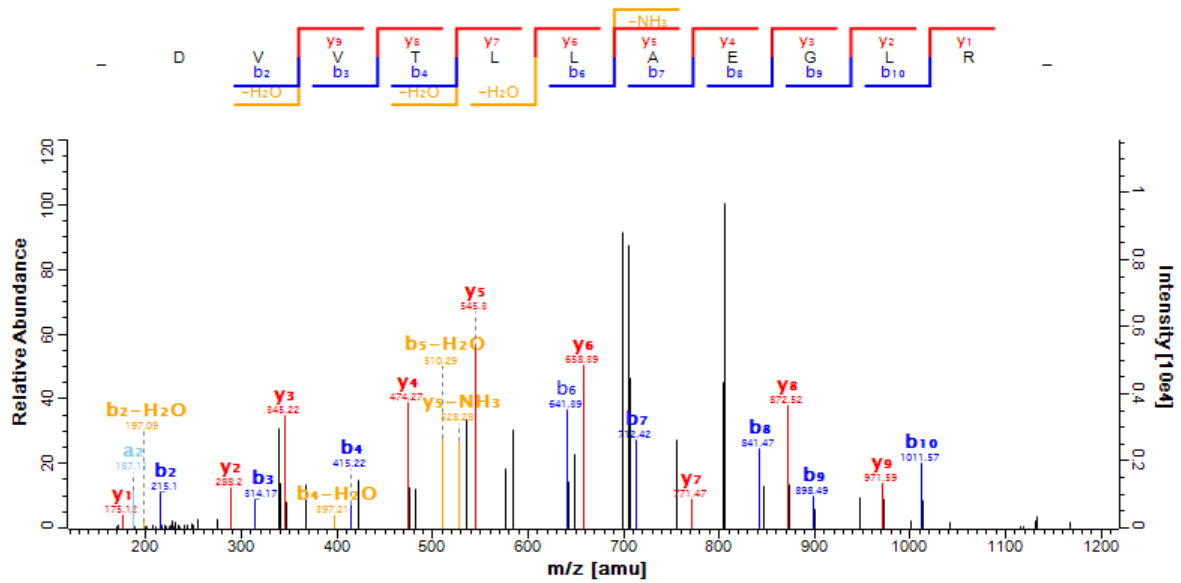

**Protein Group ID:** 131

**Protein Accession Numbers:** B4DUM7; A9UHW6-2; J3QLJ5; A9UHW6; J3QRZ6; J3KSB8; J3QKW3; J3KSU6; J3QLD1; J3QLN4

**Gene Names:** MIF4GD

**Peptide Sequence:** IQSFDAETQQLK

**Total Number of Spectra:** 2

**Number of Replicates (out of 8):** 2

**Best Match Score:** 127.71

**Best Match Posterior Error Probability:** 7.62E-05

**Best Match Spectrum:**

|                    |           |                  |                                   |
|--------------------|-----------|------------------|-----------------------------------|
| <b>Scan number</b> | 49586     | <b>Raw file</b>  | A549-US-WT-top20CID-Elite-2ug-B14 |
| <b>Method</b>      | ITMS: CID | <b>Genenames</b> | MIF4GD                            |

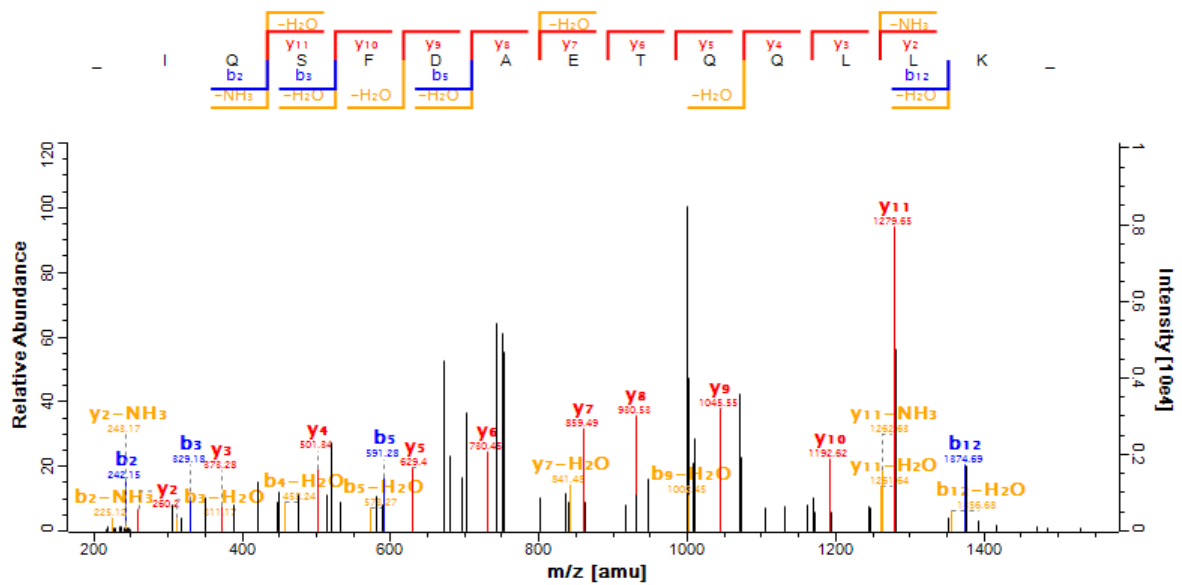

**Protein Group ID:** 133

**Protein Accession Numbers:** O60238; H0YBC7; B0AZS9

**Gene Names:** BNIP3L

**Peptide Sequence:** DHSSQSEEEVVEGEK

**Total Number of Spectra:** 1

**Number of Replicates (out of 8):** 1

**Best Match Score:** 95.236

**Best Match Posterior Error Probability:** 0.00046119

**Best Match Spectrum:**

**Scan number** 11238      **Raw file** A549-US-Mock-top20CID-Elite-2ug-B12  
**Method** ITMS; CID      **Genenames** BNIP3L

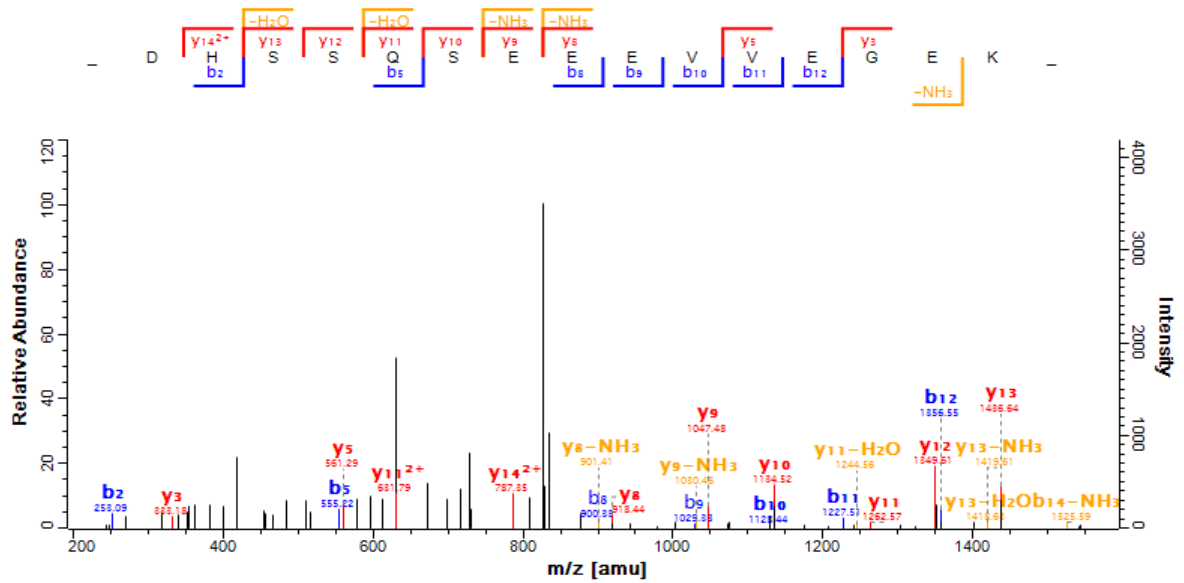



**Protein Group ID:** 136

**Protein Accession Numbers:** Q8N3F8; Q68D58; B0QY91

**Gene Names:** MICALL1;DKFZp686M2226

**Peptide Sequence:** VLMQELVTLEIQR

**Total Number of Spectra:** 4

**Number of Replicates (out of 8):** 4

**Best Match Score:** 134.9

**Best Match Posterior Error Probability:** 3.98E-05

**Best Match Spectrum:**

|                    |           |                  |                                   |
|--------------------|-----------|------------------|-----------------------------------|
| <b>Scan number</b> | 89334     | <b>Raw file</b>  | A549-US-WT-top20CID-Elite-2ug-B13 |
| <b>Method</b>      | ITMS; CID | <b>Genenames</b> | MICALL1;DKFZp686M2226             |

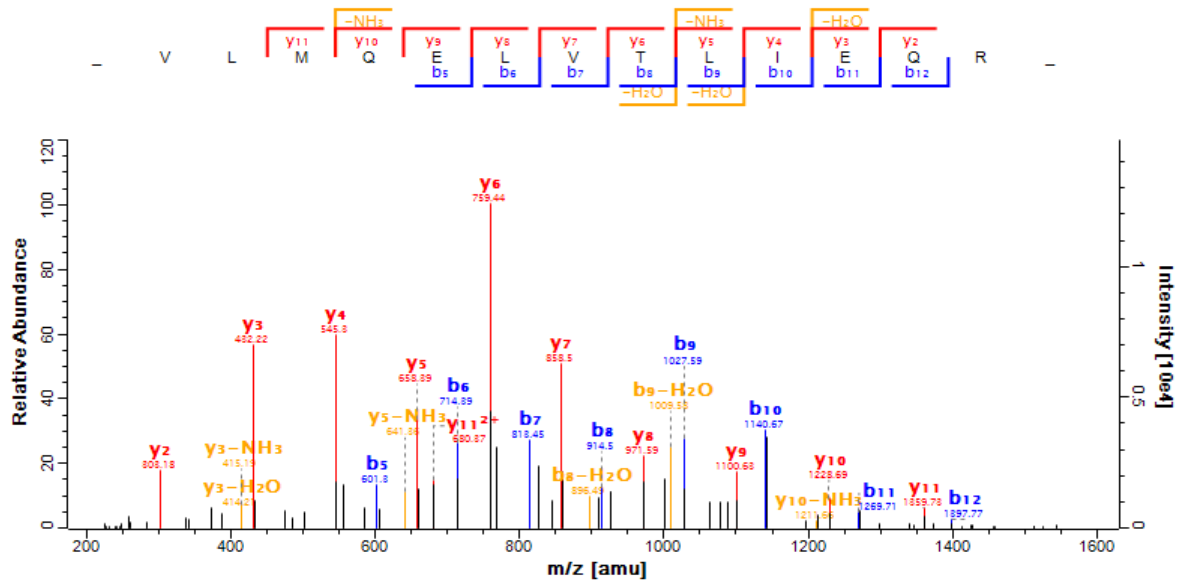

**Protein Group ID:** 137

**Protein Accession Numbers:** P02144; B0QYF8; F2Z2F1; Q8WVH6; B0QYF7

**Gene Names:** MB

**Peptide Sequence:** HGATVLTALGGILK

**Total Number of Spectra:** 3

**Number of Replicates (out of 8):** 3

**Best Match Score:** 95.094

**Best Match Posterior Error Probability:** 0.00071244

**Best Match Spectrum:**

|                    |           |                  |                                     |
|--------------------|-----------|------------------|-------------------------------------|
| <b>Scan number</b> | 64598     | <b>Raw file</b>  | A549-US-Mock-top20CID-Elite-2ug-B12 |
| <b>Method</b>      | ITMS; CID | <b>Genenames</b> | MB                                  |

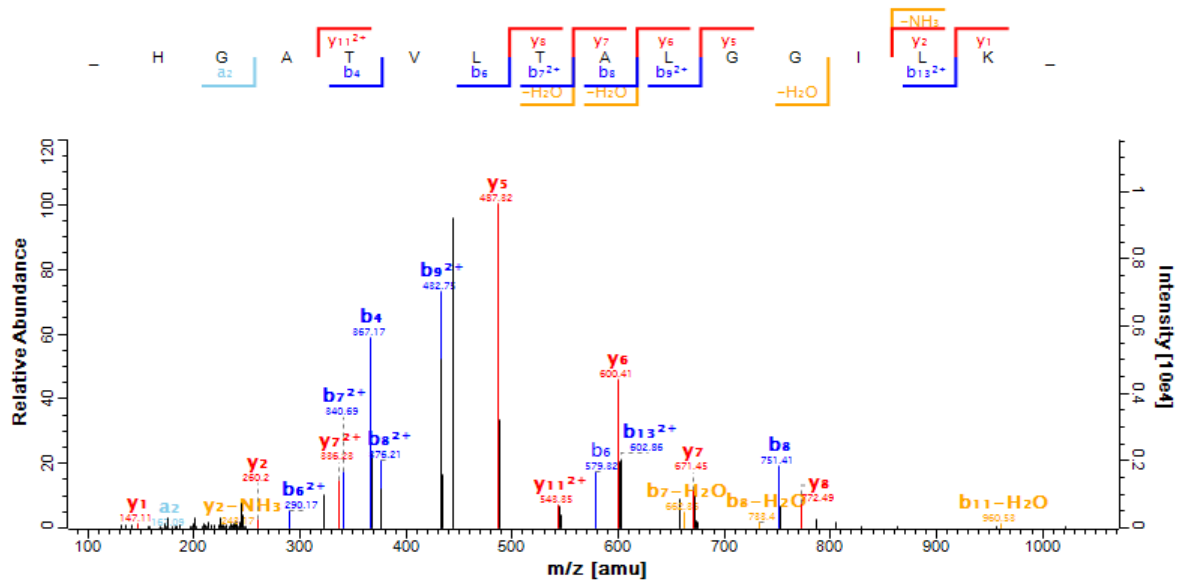

**Protein Group ID:** 138

**Protein Accession Numbers:** Q8WUA7; B0QYI3; Q8WUA7-3; F8WDP1

**Gene Names:** TBC1D22A

**Peptide Sequence:** S Q L P H S A T V T L G G T S D P S T L S S A L S E R

**Total Number of Spectra:** 2

**Number of Replicates (out of 8):** 2

**Best Match Score:** 99.753

**Best Match Posterior Error Probability:** 2.66E-09

**Best Match Spectrum:**

**Scan number** 45987      **Raw file** A549-US-Mock-top20CID-Elite-2ug-B13  
**Method** ITMS; CID      **Genenames** TBC1D22A

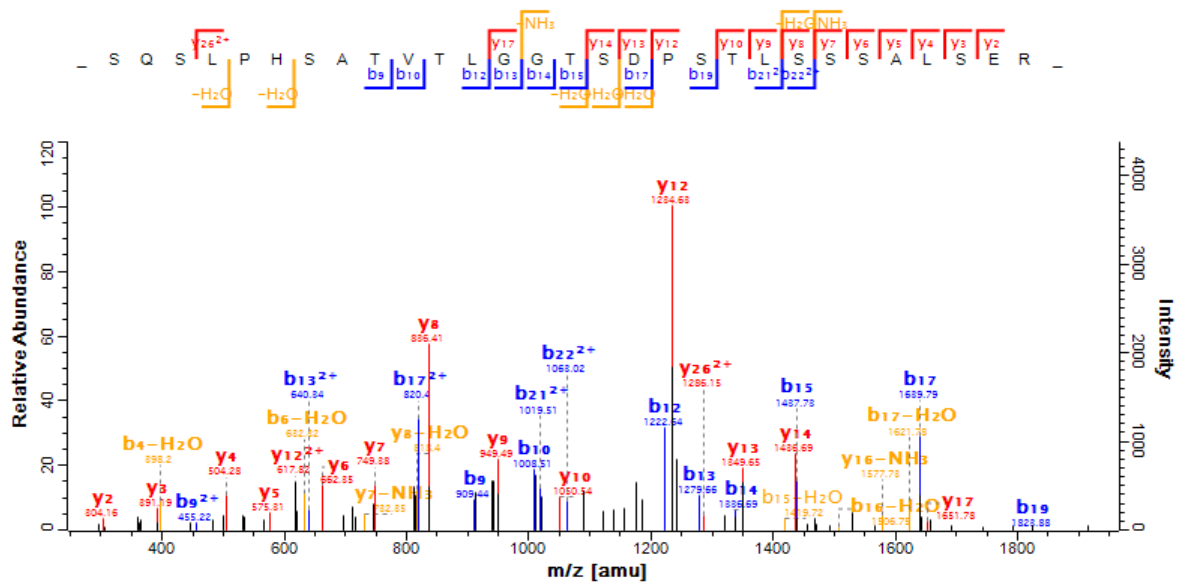

**Protein Group ID:** 140

**Protein Accession Numbers:** Q9HBI1-2; Q9HBI1; B0QYM8; B0QYP8

**Gene Names:** PARVB

**Peptide Sequence:** LNVAEVTQSEIGQK

**Total Number of Spectra:** 4

**Number of Replicates (out of 8):** 4

**Best Match Score:** 179.56

**Best Match Posterior Error Probability:** 1.92E-15

**Best Match Spectrum:**

**Scan number** 39533      **Raw file** A549-US-WT-top20CID-Elite-2ug-B14  
**Method** ITMS; CID      **Genenames** PARVB

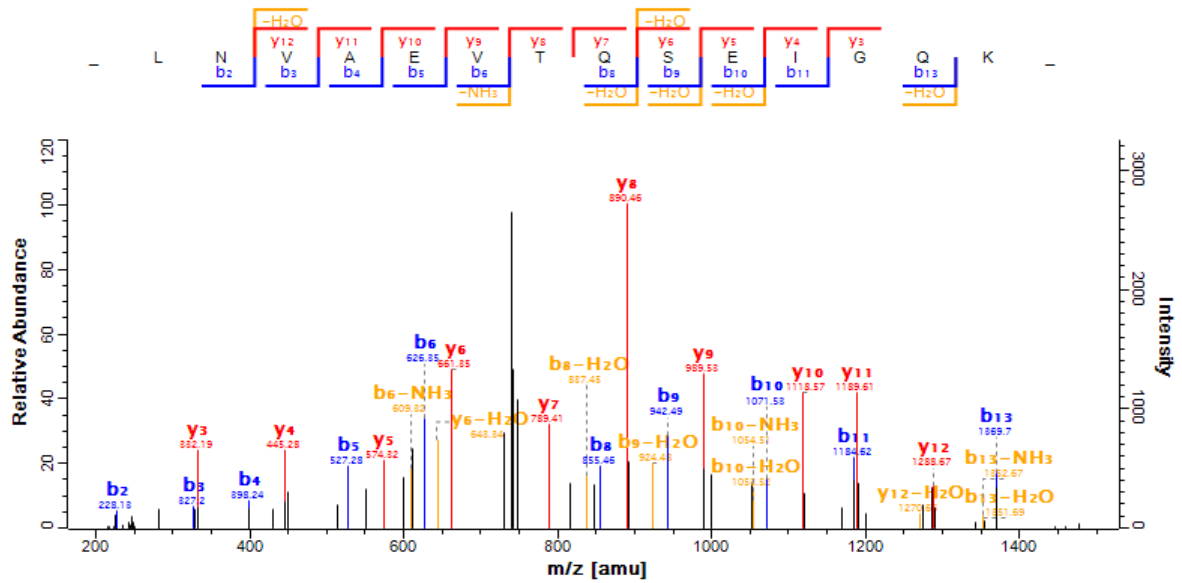

**Protein Group ID:** 141

**Protein Accession Numbers:** F8VZG9; O43251-8; O43251-6; B7Z1U7; Q9NWB1-2; J3KNW3; O43251-7; Q9NWB1; Q9NWB1-5; Q9NWB1-4; O43251; O43251-2; O43251-10; O43251-5; B0QYY4; O43251-4; Q9NWB1-3; O43251-9; B0QYV1; F8VZY7; F8VR27; B0QYY7; I3L1D4

**Gene Names:** RBFOX1;RBFOX2;RBM9

**Peptide Sequence:** GFGFVTFENSADADR

**Total Number of Spectra:** 4

**Number of Replicates (out of 8):** 3

**Best Match Score:** 130.72

**Best Match Posterior Error Probability:** 3.15E-05

**Best Match Spectrum:**

**Scan number** 55404      **Raw file** A549-US-Mock-top20CID-Elite-2ug-B11  
**Method** ITMS: CID      **Genenames** RBFOX1;RBFOX2;RBM9

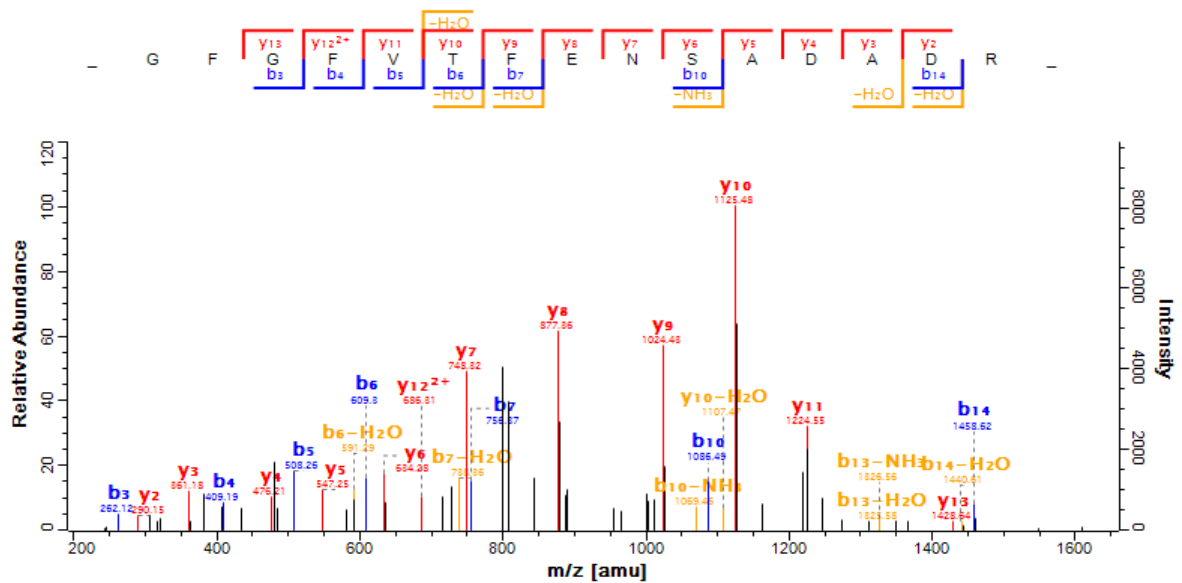

**Protein Group ID:** 142

**Protein Accession Numbers:** B0S7P1; P25440-2; H0Y5T9; H0Y6K2; P25440; F8VXF8; Q658Y7; B0V073; H0Y602; B0V072; E9PIQ3; H0Y799; H0Y801

**Gene Names:** BRD2;DKFZp313H139

**Peptide Sequence:** VASMPQEEQLVVTIPK

**Total Number of Spectra:** 2

**Number of Replicates (out of 8):** 2

**Best Match Score:** 124.68

**Best Match Posterior Error Probability:** 0.00011291

**Best Match Spectrum:**

|                    |           |                  |                                     |
|--------------------|-----------|------------------|-------------------------------------|
| <b>Scan number</b> | 54323     | <b>Raw file</b>  | A549-US-Mock-top20CID-Elite-2ug-B11 |
| <b>Method</b>      | ITMS: CID | <b>Genenames</b> | BRD2;DKFZp313H139                   |

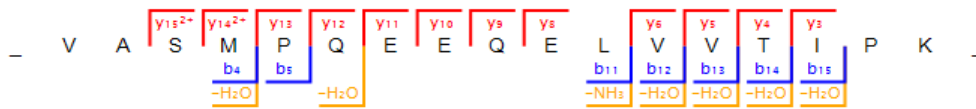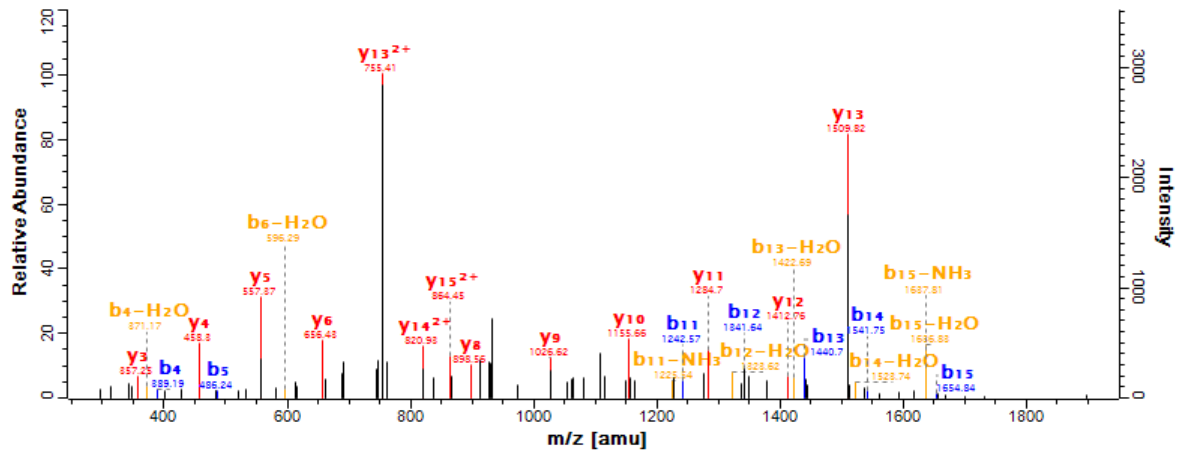

**Protein Group ID:** 144

**Protein Accession Numbers:** Q14657; B0S8I7

**Gene Names:** LAGE3

**Peptide Sequence:** GGVDTAAPAGGAPPAHAPGPGR

**Total Number of Spectra:** 11

**Number of Replicates (out of 8):** 6

**Best Match Score:** 88.176

**Best Match Posterior Error Probability:** 1.41E-05

**Best Match Spectrum:**

**Scan number** 17688      **Raw file** A549-US-WT-top20CID-Elite-2ug-B11  
**Method** ITMS; CID      **Genenames** LAGE3

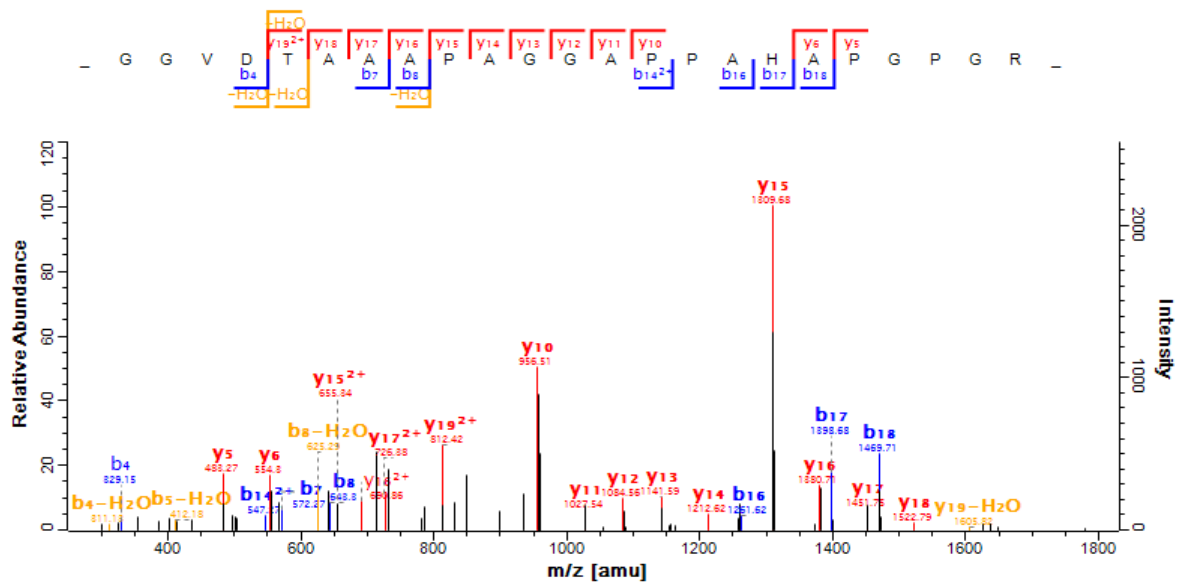

**Protein Group ID:** 146

**Protein Accession Numbers:** B0UXB6; O95870; F2Z3H2

**Gene Names:** BAT5;ABHD16A

**Peptide Sequence:** APASVPETPTAVTAPHSSSWDTYYQPR

**Total Number of Spectra:** 2

**Number of Replicates (out of 8):** 2

**Best Match Score:** 73.11

**Best Match Posterior Error Probability:** 0.00014838

**Best Match Spectrum:**

**Scan number** 47877      **Raw file** A549-US-WT-top20CID-Elite-2ug-B12  
**Method** ITMS; CID      **Genenames** BAT5;ABHD16A

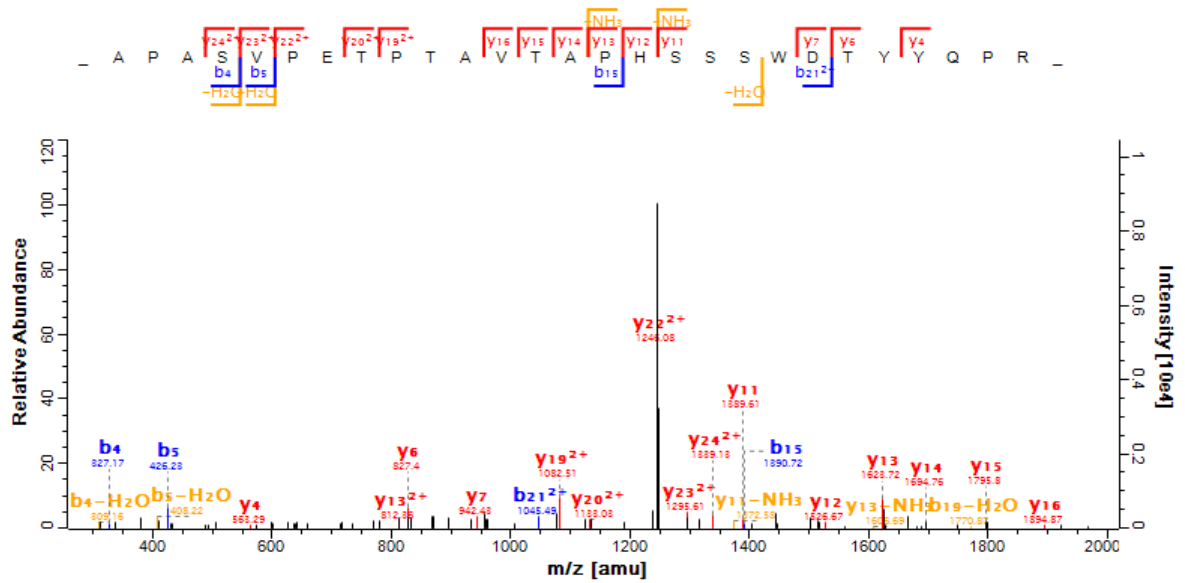



**Protein Group ID:** 149  
**Protein Accession Numbers:** B0YIW2; P02656  
**Gene Names:** APOC3  
**Peptide Sequence:** DALSSVQESQVAQQAR  
**Total Number of Spectra:** 4  
**Number of Replicates (out of 8):** 4  
**Best Match Score:** 231.71  
**Best Match Posterior Error Probability:** 1.45E-63  
**Best Match Spectrum:**

**Scan number** 29967      **Raw file** A549-US-WT-top20CID-Elite-2ug-B13  
**Method** ITMS; CID      **Genenames** APOC3

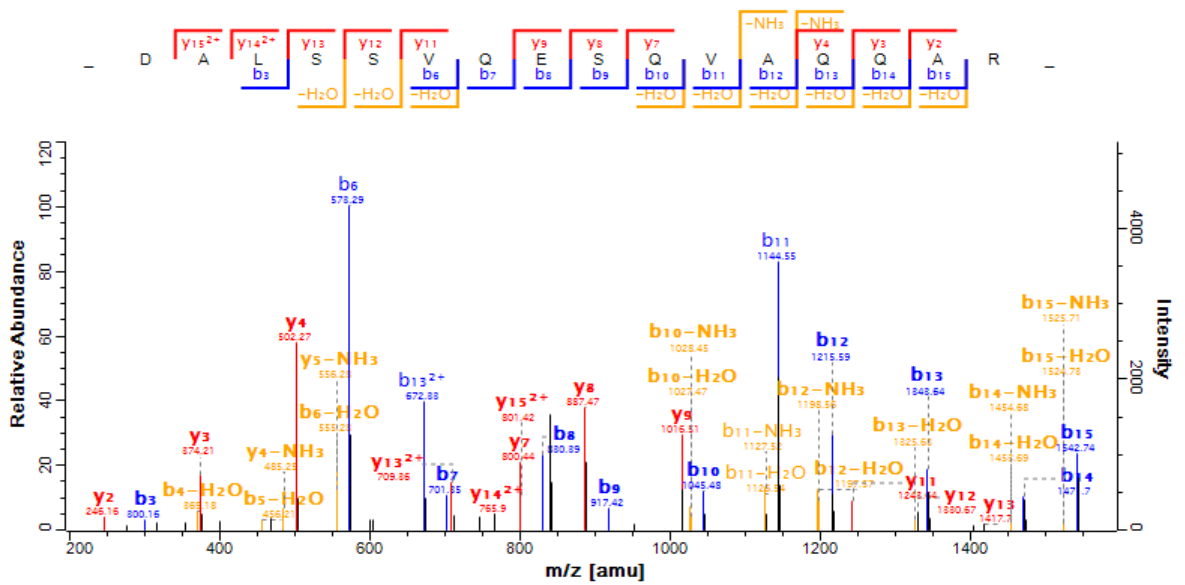

**Protein Group ID:** 150  
**Protein Accession Numbers:** P30536; B1AH87  
**Gene Names:** TSPO  
**Peptide Sequence:** APPWVPAMGFTLAPSLGCFVGSR  
**Total Number of Spectra:** 16  
**Number of Replicates (out of 8):** 8  
**Best Match Score:** 125.23  
**Best Match Posterior Error Probability:** 2.81E-11  
**Best Match Spectrum:**

**Scan number** 87976      **Raw file** A549-US-Mock-top20CID-Elite-2ug-B11  
**Method** ITMS; CID      **Genenames** TSPO

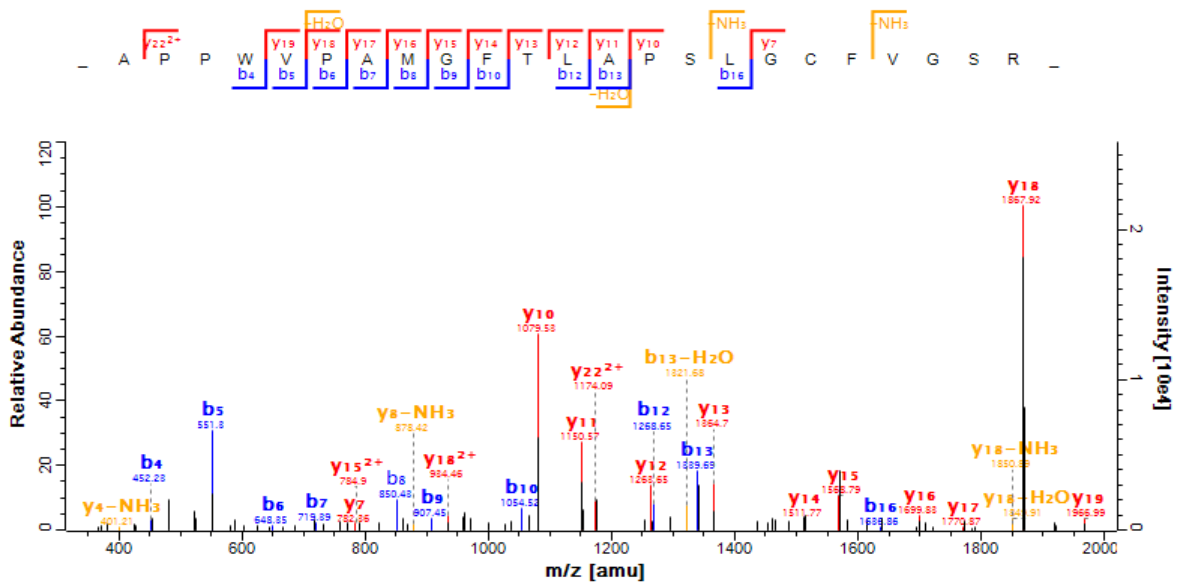

**Protein Group ID:** 154

**Protein Accession Numbers:** Q9UH03; Q9UH03-2; B1AHR1; B7Z686

**Gene Names:** Sep-03

**Peptide Sequence:** PLDLEFMK

**Total Number of Spectra:** 7

**Number of Replicates (out of 8):** 7

**Best Match Score:** 135.83

**Best Match Posterior Error Probability:** 0.00085718

**Best Match Spectrum:**

|                    |           |                  |                                     |
|--------------------|-----------|------------------|-------------------------------------|
| <b>Scan number</b> | 51600     | <b>Raw file</b>  | A549-US-Mock-top20CID-Elite-2ug-B13 |
| <b>Method</b>      | ITMS; CID | <b>Genenames</b> | SEPT3                               |

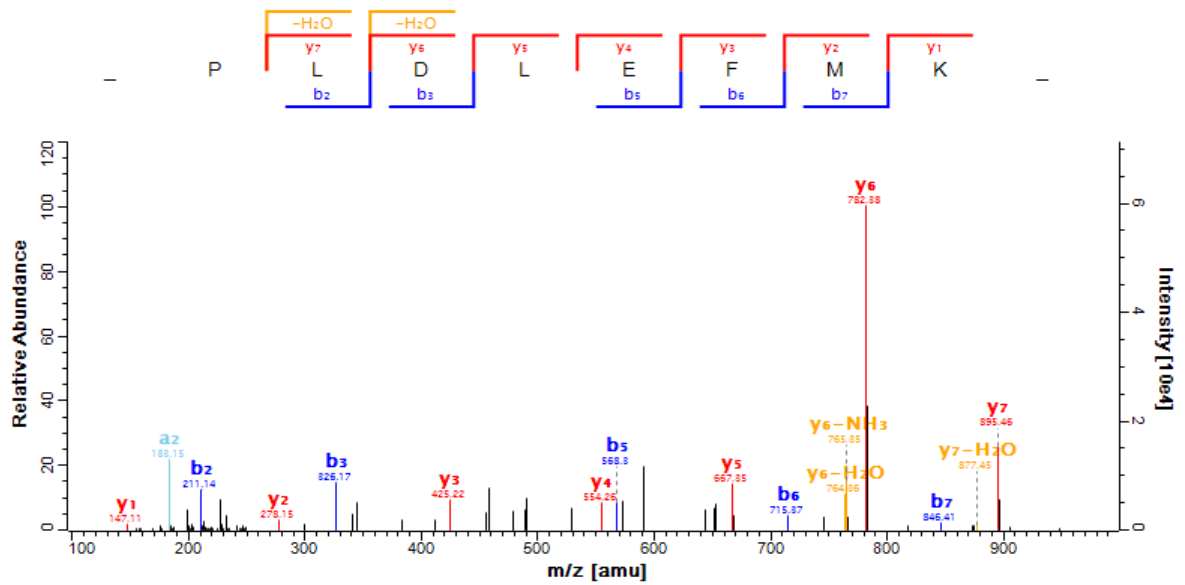

**Protein Group ID:** 158

**Protein Accession Numbers:** Q9HAF1-3; B1AK64; Q9HAF1; Q9HAF1-2; B1AK63

**Gene Names:** Clorf149;MEAF6

**Peptide Sequence:** SSVTSAAAVSALAGVQDLIEK

**Total Number of Spectra:** 1

**Number of Replicates (out of 8):** 1

**Best Match Score:** 67.251

**Best Match Posterior Error Probability:** 0.0011892

**Best Match Spectrum:**

**Scan number** 65970      **Raw file** A549-US-Mock-top20CID-Elite-2ug-B14  
**Method** ITMS; CID      **Genenames** Clorf149;MEAF6

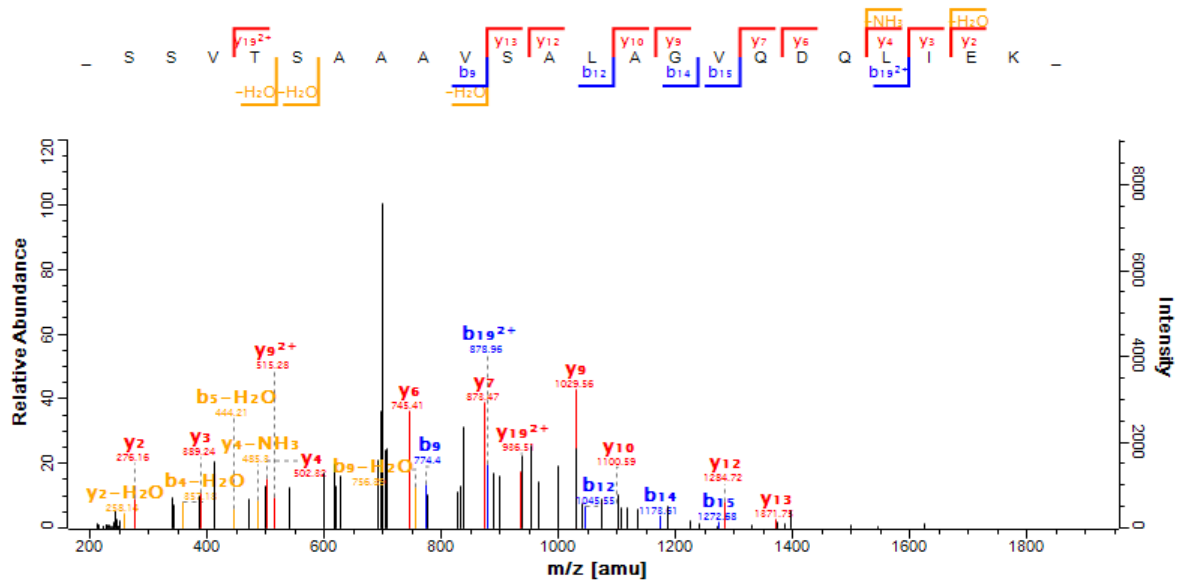

**Protein Group ID:** 160  
**Protein Accession Numbers:** Q5TZA2; B1AKD8; Q5TZA2-2  
**Gene Names:** CROCC  
**Peptide Sequence:** LALLEEAR  
**Total Number of Spectra:** 8  
**Number of Replicates (out of 8):** 8  
**Best Match Score:** 112.84  
**Best Match Posterior Error Probability:** 0.0026712  
**Best Match Spectrum:**

**Scan number** 32663      **Raw file** A549-US-Mock-top20CID-Elite-2ug-B12  
**Method** ITMS; CID      **Genenames** CROCC

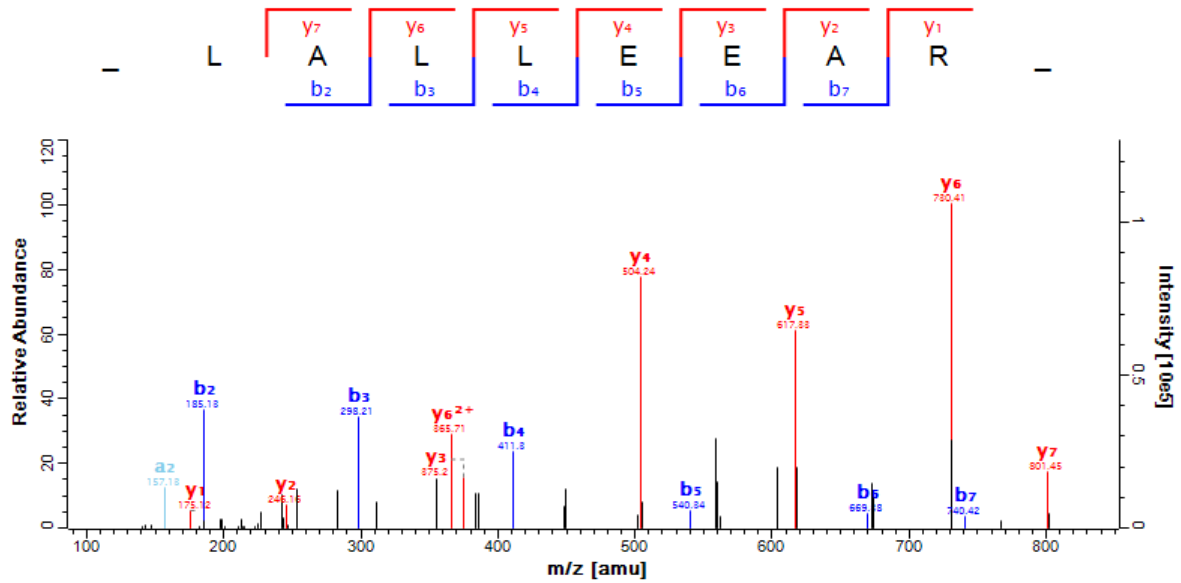

**Protein Group ID:** 163

**Protein Accession Numbers:** Q12857; Q12857-2; B1AKN5; B1AKN7; B1AKN6

**Gene Names:** NFIA

**Peptide Sequence:** MYSPLCLTQDEFHPFIEALLPHVR

**Total Number of Spectra:** 1

**Number of Replicates (out of 8):** 1

**Best Match Score:** 76.155

**Best Match Posterior Error Probability:** 0.00019868

**Best Match Spectrum:**

**Scan number** 93326      **Raw file** A549-US-Mock-top20CID-Elite-2ug-B12  
**Method** ITMS; CID      **Genenames** NFIA

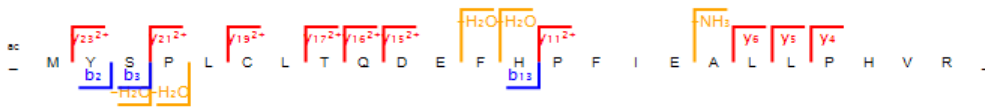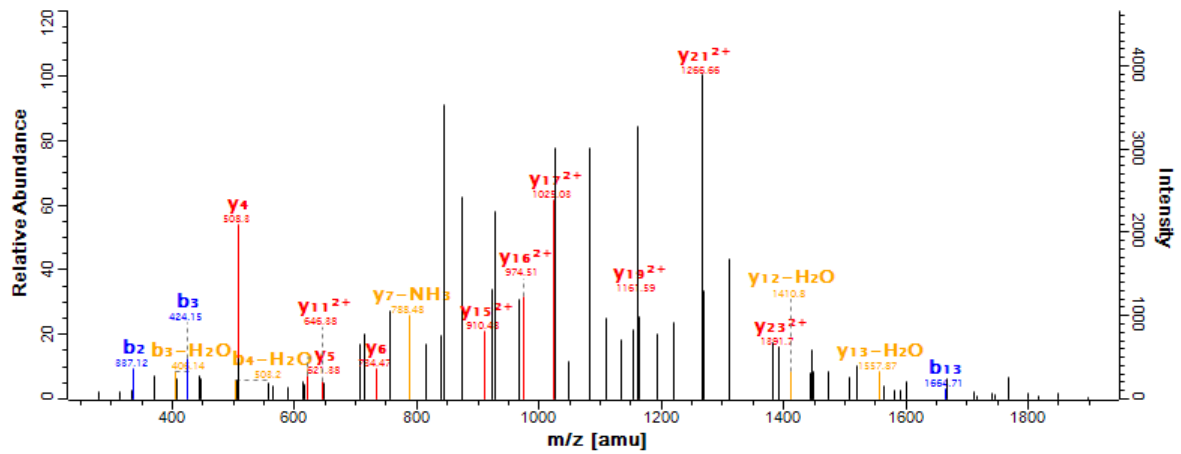

**Protein Group ID:** 164

**Protein Accession Numbers:** Q92845; B1AKU4; Q92845-2

**Gene Names:** KIFAP3

**Peptide Sequence:** LNEVEQLLYLQNR

**Total Number of Spectra:** 1

**Number of Replicates (out of 8):** 1

**Best Match Score:** 102.97

**Best Match Posterior Error Probability:** 0.00028661

**Best Match Spectrum:**

**Scan number** 90825      **Raw file** A549-US-WT-top20CID-Elite-2ug-B12  
**Method** ITMS; CID      **Genenames** KIFAP3

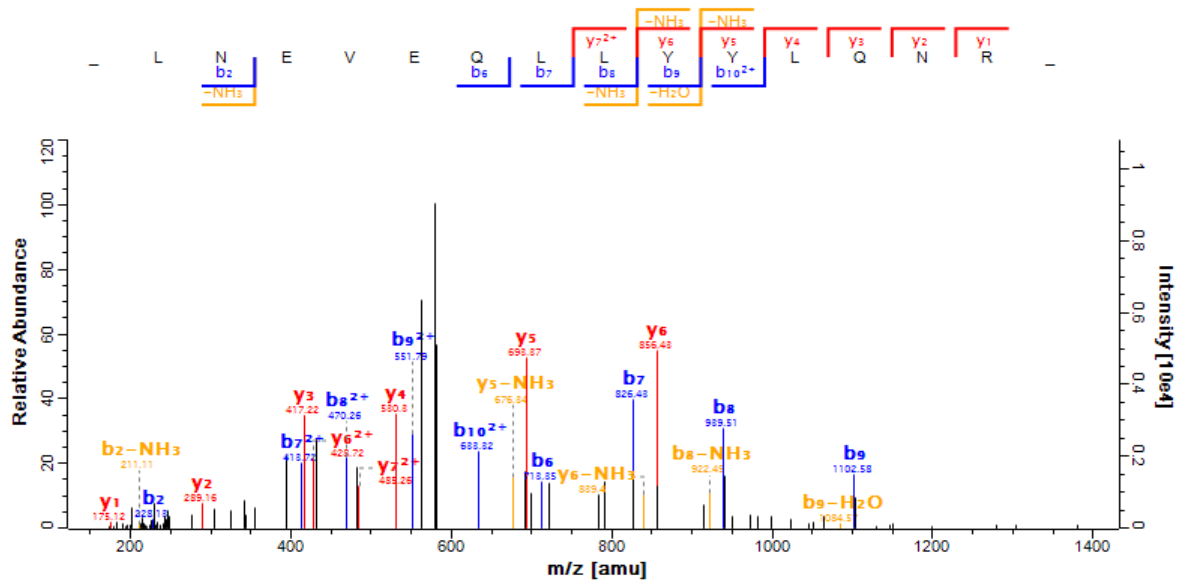

**Protein Group ID:** 165

**Protein Accession Numbers:** Q9NVA1; Q9NVA1-2; Q9NVA1-4; Q9NVA1-5; B1AKV4; B7Z314; H7BYA2; Q9NVA1-3; B7Z7J8; B7Z1C6

**Gene Names:** UQCC

**Peptide Sequence:** PHSPTYNDEGL

**Total Number of Spectra:** 2

**Number of Replicates (out of 8):** 2

**Best Match Score:** 114.89

**Best Match Posterior Error Probability:** 0.00010499

**Best Match Spectrum:**

|                    |           |                  |                                     |
|--------------------|-----------|------------------|-------------------------------------|
| <b>Scan number</b> | 20393     | <b>Raw file</b>  | A549-US-Mock-top20CID-Elite-2ug-B12 |
| <b>Method</b>      | ITMS; CID | <b>Genenames</b> | UQCC                                |

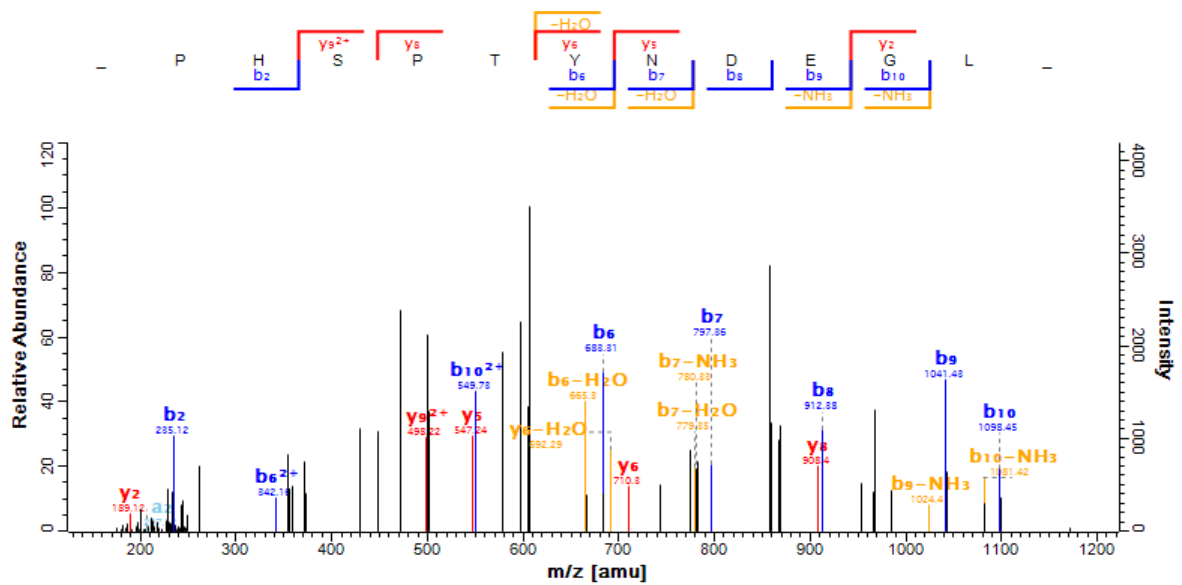



**Protein Group ID:** 168

**Protein Accession Numbers:** Q9BPZ7; Q9BPZ7-2; Q9BPZ7-3; Q9BPZ7-6; Q9BPZ7-5; B1AMB2; B1AMB1

**Gene Names:** MAPKAP1

**Peptide Sequence:** AFLDNPTIILAHIR

**Total Number of Spectra:** 2

**Number of Replicates (out of 8):** 2

**Best Match Score:** 162.93

**Best Match Posterior Error Probability:** 1.69E-09

**Best Match Spectrum:**

|                    |           |                  |                                   |
|--------------------|-----------|------------------|-----------------------------------|
| <b>Scan number</b> | 89248     | <b>Raw file</b>  | A549-US-WT-top20CID-Elite-2ug-B12 |
| <b>Method</b>      | ITMS: CID | <b>Genenames</b> | MAPKAP1                           |

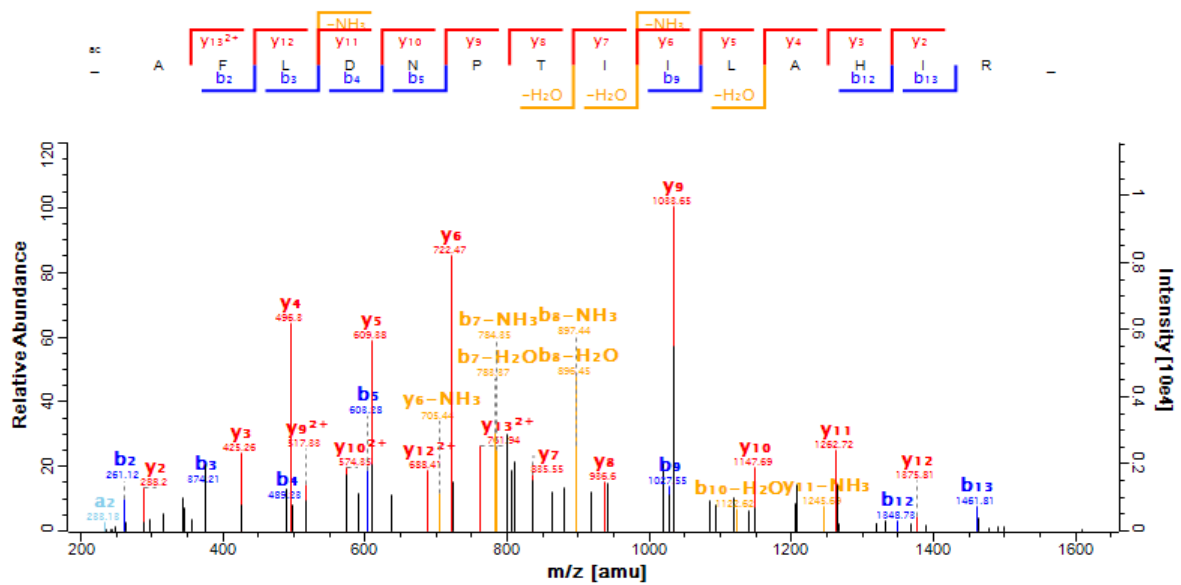

**Protein Group ID:** 171

**Protein Accession Numbers:** P19256; P19256-3; B1AMW1; P19256-2; H0YDI1

**Gene Names:** CD58

**Peptide Sequence:** VAELENSFR

**Total Number of Spectra:** 2

**Number of Replicates (out of 8):** 2

**Best Match Score:** 96.604

**Best Match Posterior Error Probability:** 0.0011276

**Best Match Spectrum:**

**Scan number** 25529      **Raw file** A549-US-Mock-top20CID-Elite-2ug-B14  
**Method** ITMS; CID      **Genenames** CD58

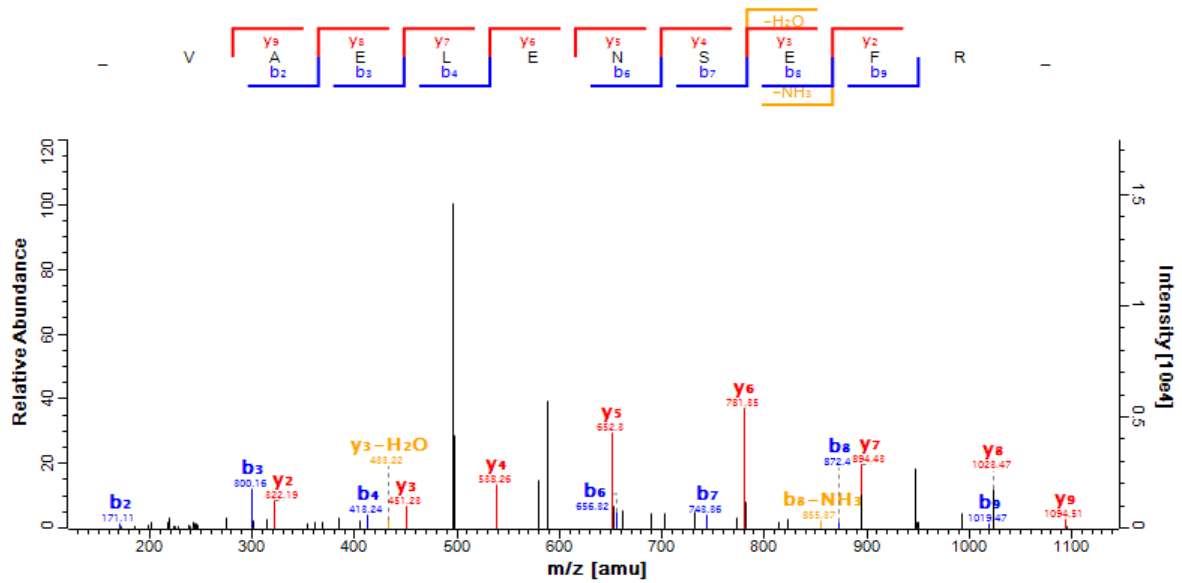

**Protein Group ID:** 172  
**Protein Accession Numbers:** O00311; B1AMW7  
**Gene Names:** CDC7  
**Peptide Sequence:** LYEAVPQLS<sup>NS</sup>VNFKIEDK  
**Total Number of Spectra:** 1  
**Number of Replicates (out of 8):** 1  
**Best Match Score:** 113.4  
**Best Match Posterior Error Probability:** 0.0010543  
**Best Match Spectrum:**

**Scan number** 1688      **Raw file** A549-US-WT-top20CID-Elite-2ug-B11  
**Method** ITMS; CID      **Genenames** CDC7

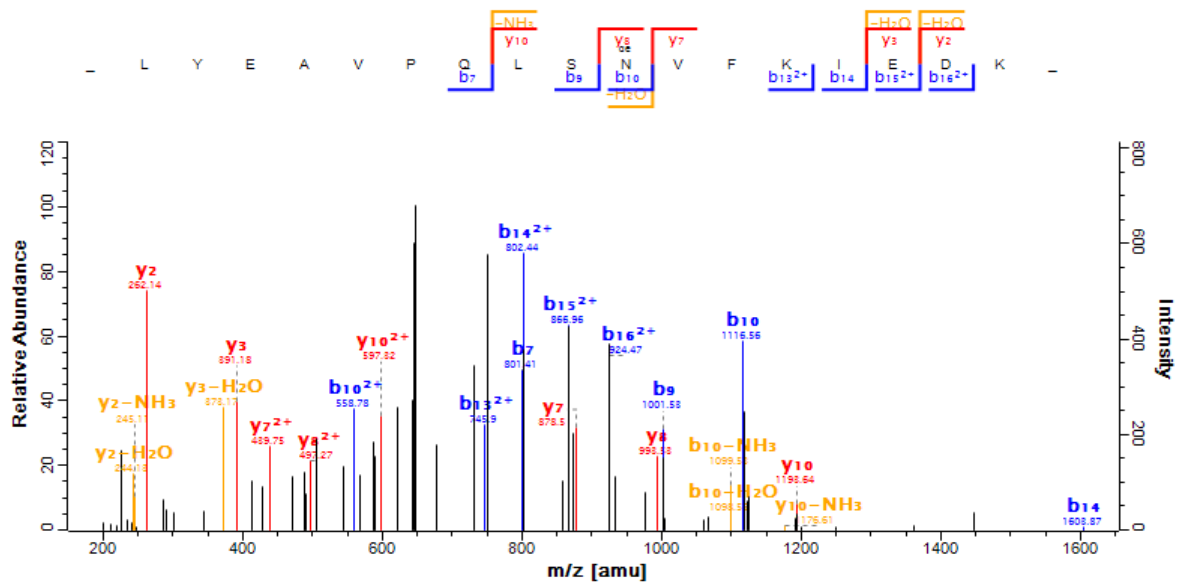

**Protein Group ID:** 179

**Protein Accession Numbers:** Q8TAG9; E7EW84; B1AP46

**Gene Names:** EXOC6

**Peptide Sequence:** AENSESLGTVPEHER

**Total Number of Spectra:** 8

**Number of Replicates (out of 8):** 5

**Best Match Score:** 140.22

**Best Match Posterior Error Probability:** 1.92E-05

**Best Match Spectrum:**

|                    |           |                  |                                   |
|--------------------|-----------|------------------|-----------------------------------|
| <b>Scan number</b> | 22733     | <b>Raw file</b>  | A549-US-WT-top20CID-Elite-2ug-B12 |
| <b>Method</b>      | ITMS; CID | <b>Genenames</b> | EXOC6                             |

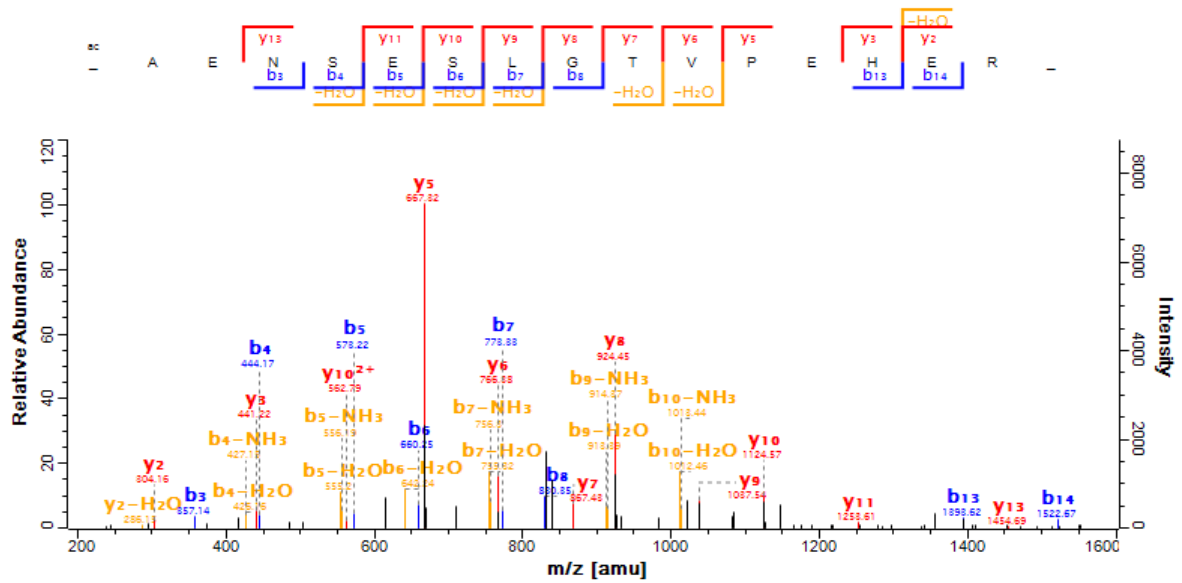

**Protein Group ID:** 181

**Protein Accession Numbers:** Q9BYP7; Q9BYP7-2; Q9BYP7-4; Q9BYP7-3; B1AQN8

**Gene Names:** WNK3

**Peptide Sequence:** VDKLPSNVLR

**Total Number of Spectra:** 2

**Number of Replicates (out of 8):** 2

**Best Match Score:** 104.79

**Best Match Posterior Error Probability:** 0.002608

**Best Match Spectrum:**

|                    |           |                  |                                   |
|--------------------|-----------|------------------|-----------------------------------|
| <b>Scan number</b> | 21578     | <b>Raw file</b>  | A549-US-WT-top20CID-Elite-2ug-B12 |
| <b>Method</b>      | ITMS; CID | <b>Genenames</b> | WNK3                              |

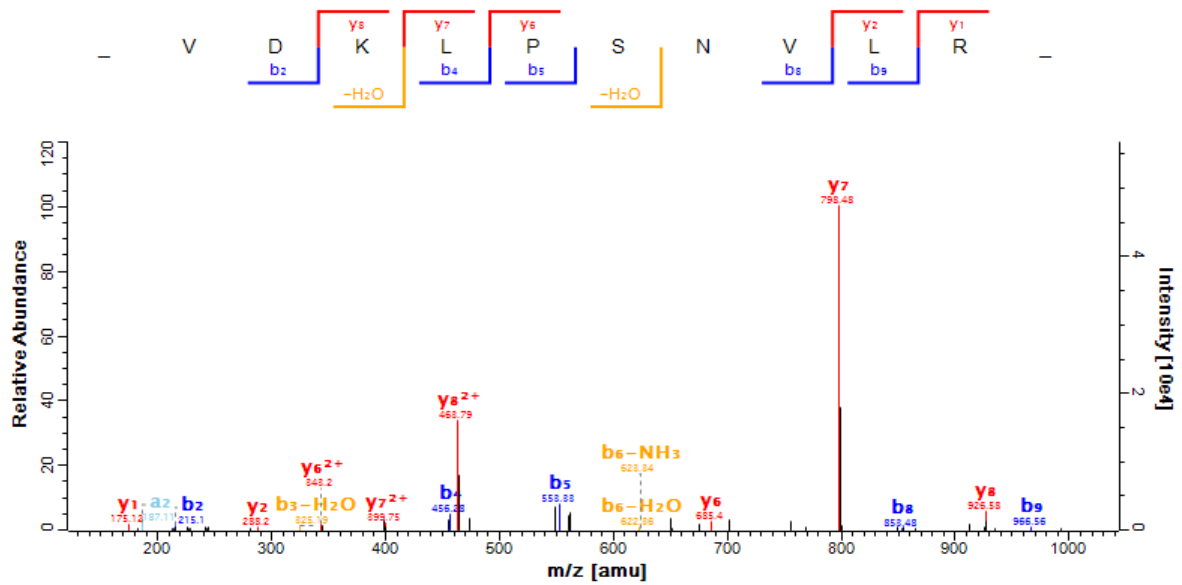

**Protein Group ID:** 185

**Protein Accession Numbers:** Q5HYJ3; F5GX09; B2R9C2; Q5HYJ3-2

**Gene Names:** FAM76B

**Peptide Sequence:** SSATIQNETPK

**Total Number of Spectra:** 3

**Number of Replicates (out of 8):** 2

**Best Match Score:** 146.16

**Best Match Posterior Error Probability:** 1.14E-05

**Best Match Spectrum:**

**Scan number** 7116      **Raw file** A549-US-WT-top20CID-Elite-2ug-B13  
**Method** ITMS; CID      **Genenames** FAM76B

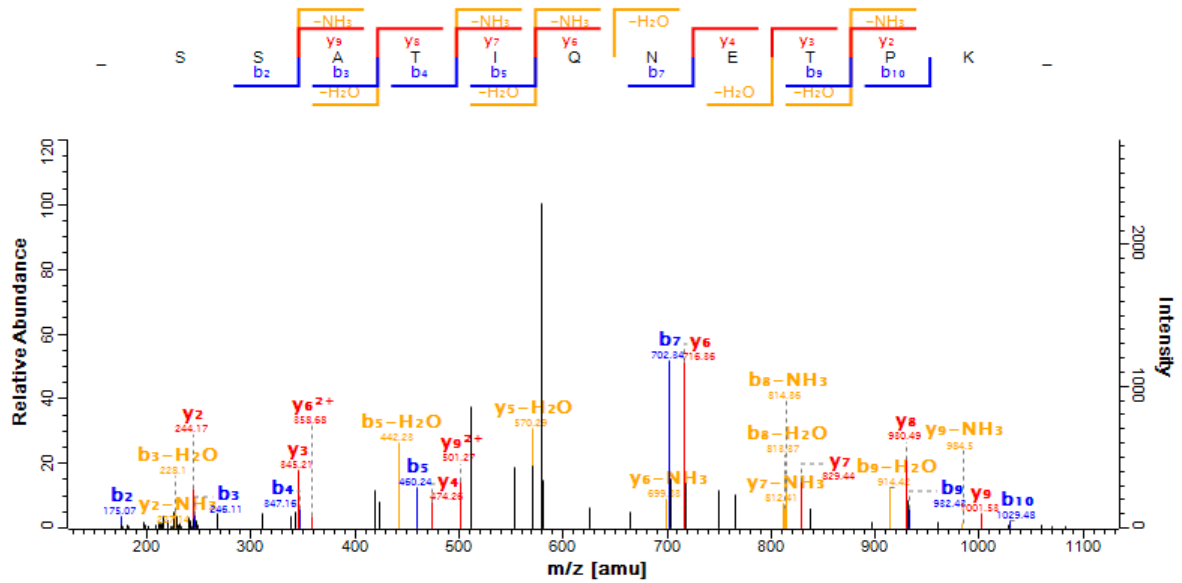

**Protein Group ID:** 186  
**Protein Accession Numbers:** B2RCS5; P35609  
**Gene Names:** ACTN2  
**Peptide Sequence:** AGTQIENIEEDFRNGLK  
**Total Number of Spectra:** 3  
**Number of Replicates (out of 8):** 3  
**Best Match Score:** 211.9  
**Best Match Posterior Error Probability:** 1.67E-38  
**Best Match Spectrum:**

**Scan number** 61537      **Raw file** A549-US-WT-top20CID-Elite-2ug-B11  
**Method** ITMS; CID      **Genenames** ACTN2

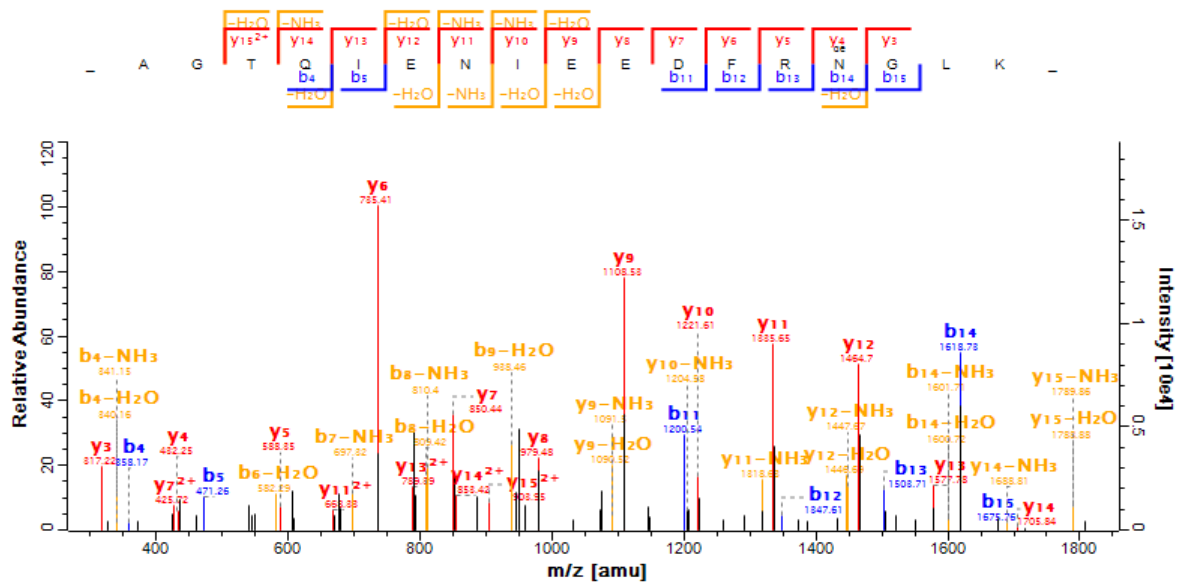

**Protein Group ID:** 191

**Protein Accession Numbers:** I3NI25; Q96NB1; I3L269; B3KPU9

**Gene Names:** FOPNL

**Peptide Sequence:** STNIEDLHVSQAVNR

**Total Number of Spectra:** 2

**Number of Replicates (out of 8):** 2

**Best Match Score:** 94.569

**Best Match Posterior Error Probability:** 0.00050687

**Best Match Spectrum:**

|                    |           |                  |                                     |
|--------------------|-----------|------------------|-------------------------------------|
| <b>Scan number</b> | 29262     | <b>Raw file</b>  | A549-US-Mock-top20CID-Elite-2ug-B13 |
| <b>Method</b>      | ITMS; CID | <b>Genenames</b> | FOPNL                               |

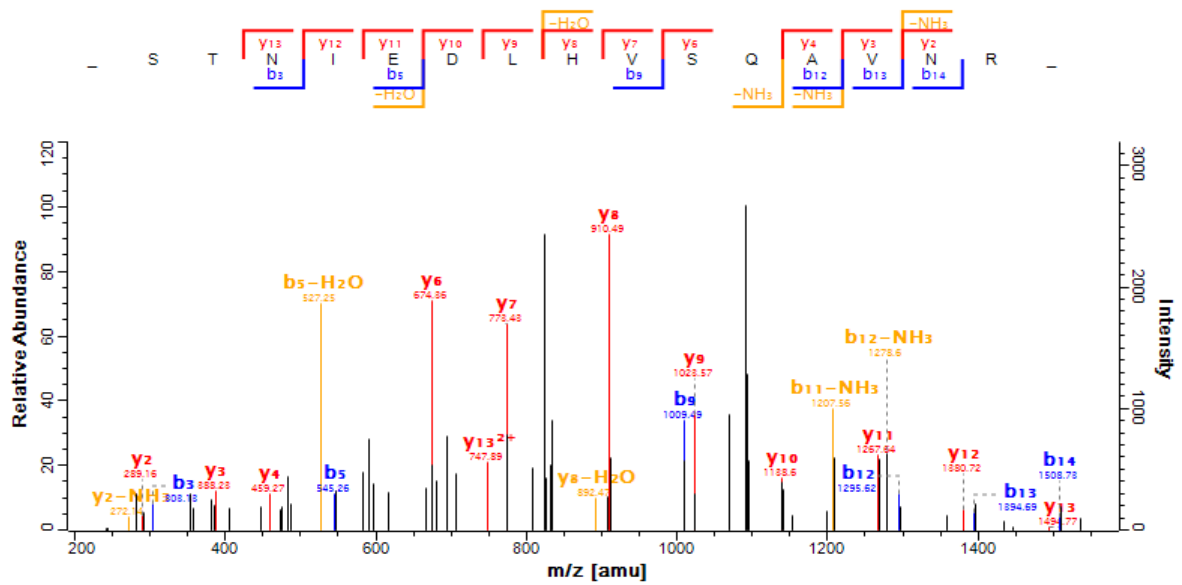



**Protein Group ID:** 197

**Protein Accession Numbers:** Q9UPY3; Q9UPY3-2; B3KRG4

**Gene Names:** DICER1

**Peptide Sequence:** AVSPELFHVIDDFVQFQYLK

**Total Number of Spectra:** 1

**Number of Replicates (out of 8):** 1

**Best Match Score:** 69.188

**Best Match Posterior Error Probability:** 0.002106

**Best Match Spectrum:**

|                    |           |                  |                                   |
|--------------------|-----------|------------------|-----------------------------------|
| <b>Scan number</b> | 93411     | <b>Raw file</b>  | A549-US-WT-top20CID-Elite-2ug-B11 |
| <b>Method</b>      | ITMS; CID | <b>Genenames</b> | DICER1                            |

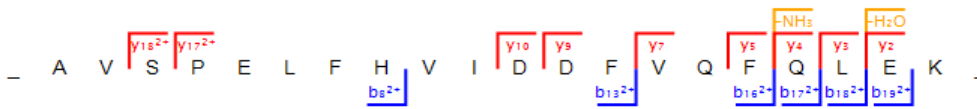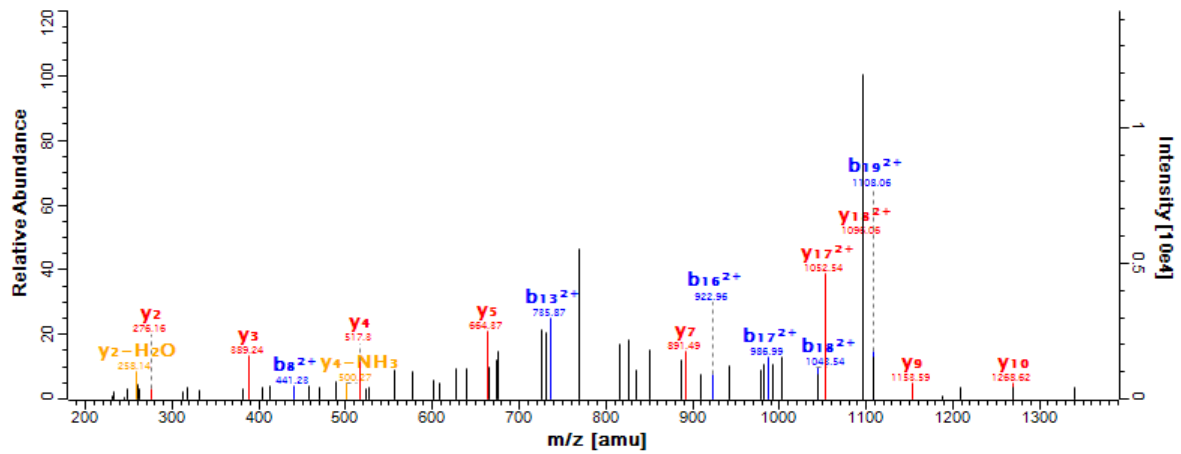

**Protein Group ID:** 199

**Protein Accession Numbers:** P07992; P07992-2; B3KRR0

**Gene Names:** ERCC1

**Peptide Sequence:** LFDVLHEPFLK

**Total Number of Spectra:** 6

**Number of Replicates (out of 8):** 6

**Best Match Score:** 112.75

**Best Match Posterior Error Probability:** 0.00012314

**Best Match Spectrum:**

**Scan number** 64379      **Raw file** A549-US-Mock-top20CID-Elite-2ug-B11  
**Method** ITMS; CID      **Genenames** ERCC1

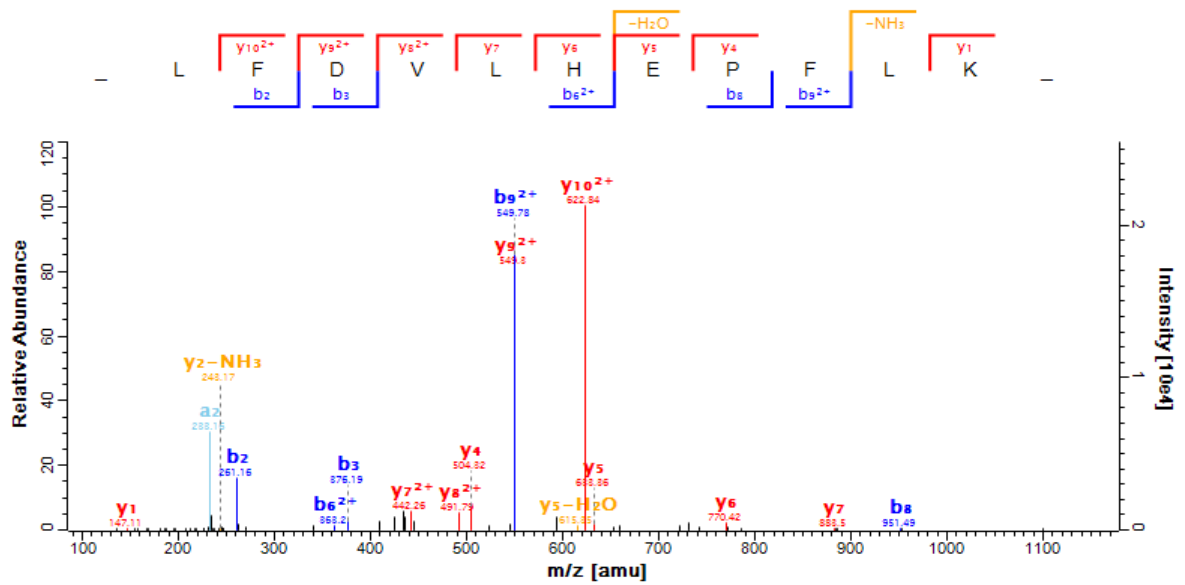

**Protein Group ID:** 203

**Protein Accession Numbers:** Q9NQ48; B3KSI9; F5GWL8; H7C488

**Gene Names:** LZTFL1

**Peptide Sequence:** ALQDLQLDQGNQK

**Total Number of Spectra:** 2

**Number of Replicates (out of 8):** 1

**Best Match Score:** 155.43

**Best Match Posterior Error Probability:** 2.83E-07

**Best Match Spectrum:**

**Scan number** 28871      **Raw file** A549-US-WT-top20CID-Elite-2ug-B11  
**Method** ITMS; CID      **Genenames** LZTFL1

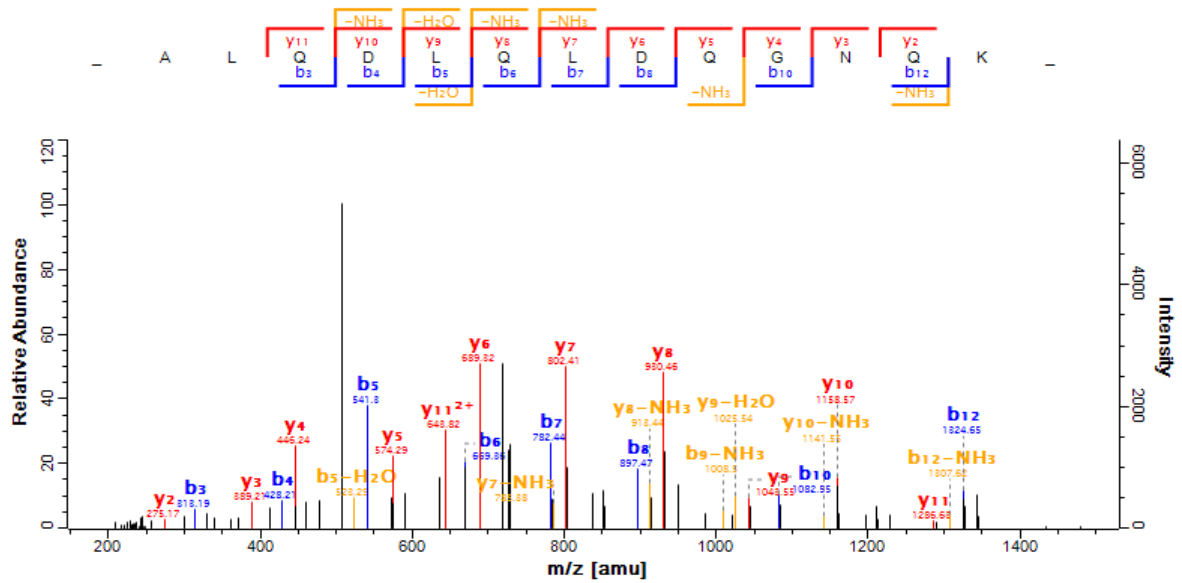

**Protein Group ID:** 213

**Protein Accession Numbers:** B3KY94; O14735; H3BTV1

**Gene Names:** CDIPT

**Peptide Sequence:** NMAALDAADR

**Total Number of Spectra:** 4

**Number of Replicates (out of 8):** 4

**Best Match Score:** 111.86

**Best Match Posterior Error Probability:** 0.00029194

**Best Match Spectrum:**

|                    |           |                  |                                     |
|--------------------|-----------|------------------|-------------------------------------|
| <b>Scan number</b> | 18414     | <b>Raw file</b>  | A549-US-Mock-top20CID-Elite-2ug-B14 |
| <b>Method</b>      | ITMS; CID | <b>Genenames</b> | CDIPT                               |

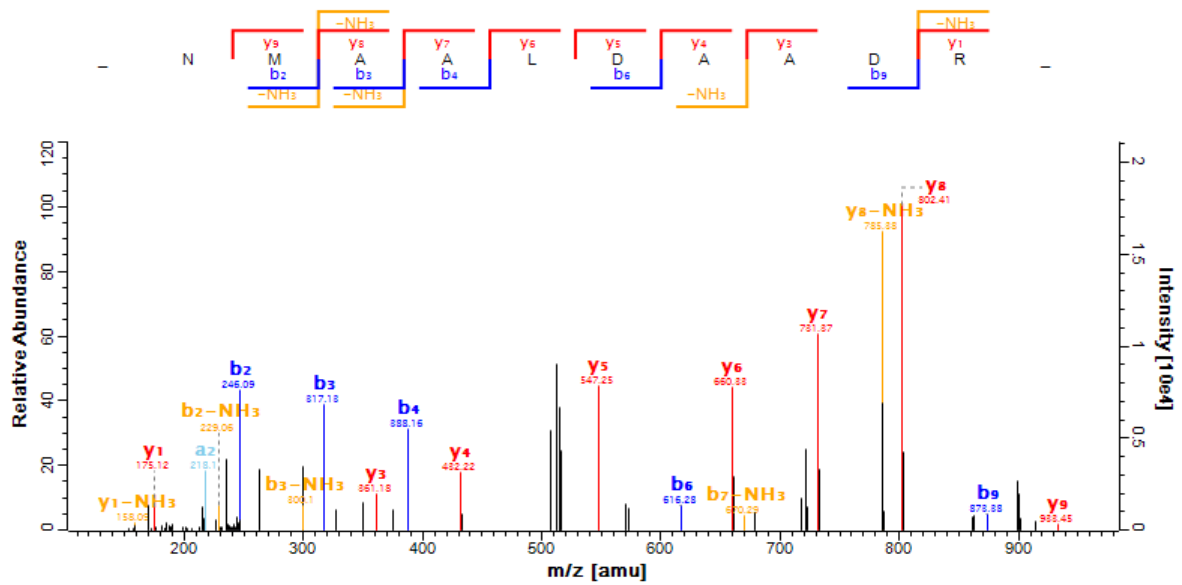

**Protein Group ID:** 214

**Protein Accession Numbers:** B3KYA7; Q13188; E5RFQ9

**Gene Names:** STK3

**Peptide Sequence:** DLITEAMEIK

**Total Number of Spectra:** 4

**Number of Replicates (out of 8):** 4

**Best Match Score:** 141.88

**Best Match Posterior Error Probability:** 1.42E-05

**Best Match Spectrum:**

**Scan number** 64050      **Raw file** A549-US-WT-top20CID-Elite-2ug-B12  
**Method** ITMS; CID      **Genenames** STK3

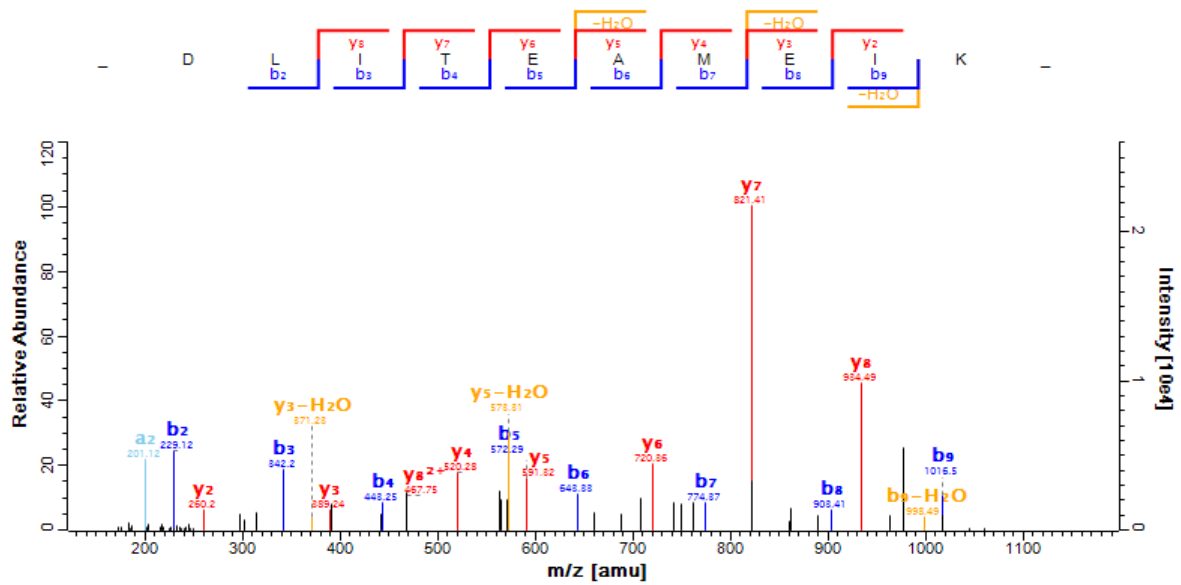

**Protein Group ID:** 217

**Protein Accession Numbers:** B4E171; B4DEA5; B4DDG0; P41732; B4DEB8

**Gene Names:** TSPAN7

**Peptide Sequence:** TYTDAMQTYNGNDER

**Total Number of Spectra:** 5

**Number of Replicates (out of 8):** 5

**Best Match Score:** 217.48

**Best Match Posterior Error Probability:** 2.42E-48

**Best Match Spectrum:**

**Scan number** 22379      **Raw file** A549-US-Mock-top20CID-Elite-2ug-B12  
**Method** ITMS; CID      **Genenames** TSPAN7

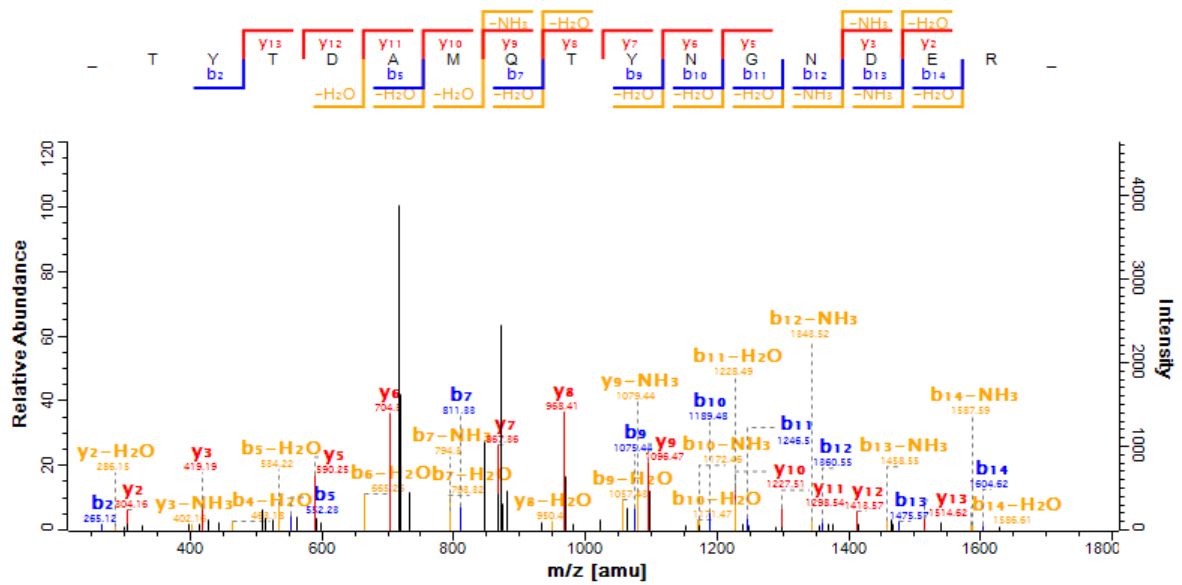

**Protein Group ID:** 224  
**Protein Accession Numbers:** Q68CZ6; B4DF64  
**Gene Names:** HAUS3  
**Peptide Sequence:** LYQVLEGENK  
**Total Number of Spectra:** 1  
**Number of Replicates (out of 8):** 1  
**Best Match Score:** 89.171  
**Best Match Posterior Error Probability:** 0.0020853  
**Best Match Spectrum:**

**Scan number** 27062      **Raw file** A549-US-Mock-top20CID-Elite-2ug-B14  
**Method** ITMS; CID      **Genenames** HAUS3

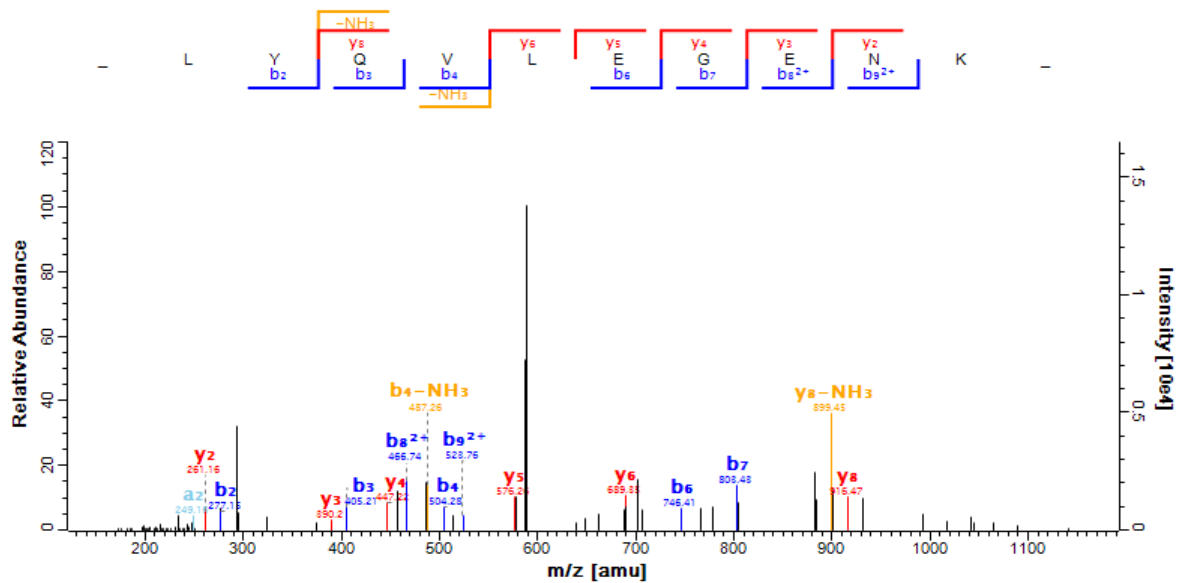

**Protein Group ID:** 226

**Protein Accession Numbers:** E9PAV7; J3KQN8; Q13772; B4DF87; B4DZ85

**Gene Names:** NCOA4

**Peptide Sequence:** MGNLSQLSSGEDK

**Total Number of Spectra:** 1

**Number of Replicates (out of 8):** 1

**Best Match Score:** 80.706

**Best Match Posterior Error Probability:** 0.0031517

**Best Match Spectrum:**

**Scan number** 23868      **Raw file** A549-US-Mock-top20CID-Elite-2ug-B11  
**Method** ITMS; CID      **Genenames** NCOA4

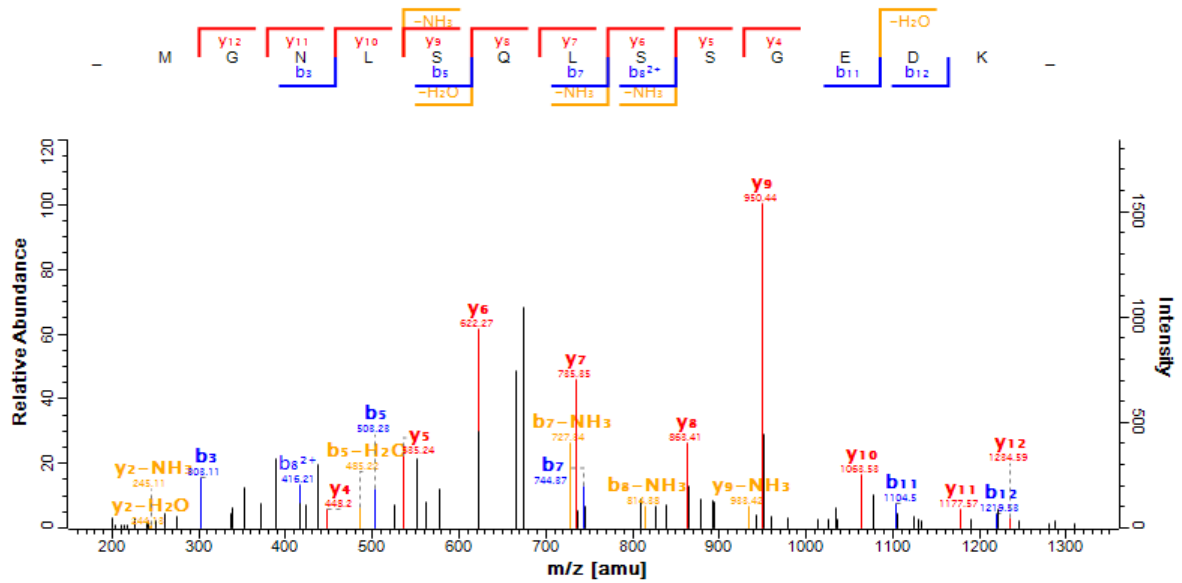



**Protein Group ID:** 231

**Protein Accession Numbers:** Q6PD74; B4DG44; H0YL49

**Gene Names:** AAGAB

**Peptide Sequence:** HGFELVELSELP EELP EEDD DDFPESTGVK

**Total Number of Spectra:** 12

**Number of Replicates (out of 8):** 7

**Best Match Score:** 83.31

**Best Match Posterior Error Probability:** 4.62E-05

**Best Match Spectrum:**

|                    |           |                  |                                     |
|--------------------|-----------|------------------|-------------------------------------|
| <b>Scan number</b> | 69303     | <b>Raw file</b>  | A549-US-Mock-top20CID-Elite-2ug-B11 |
| <b>Method</b>      | ITMS; CID | <b>Genenames</b> | AAGAB                               |

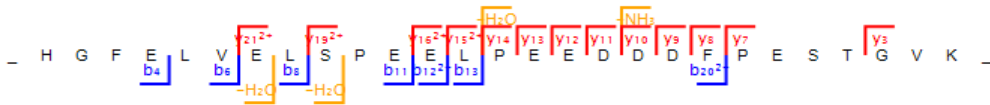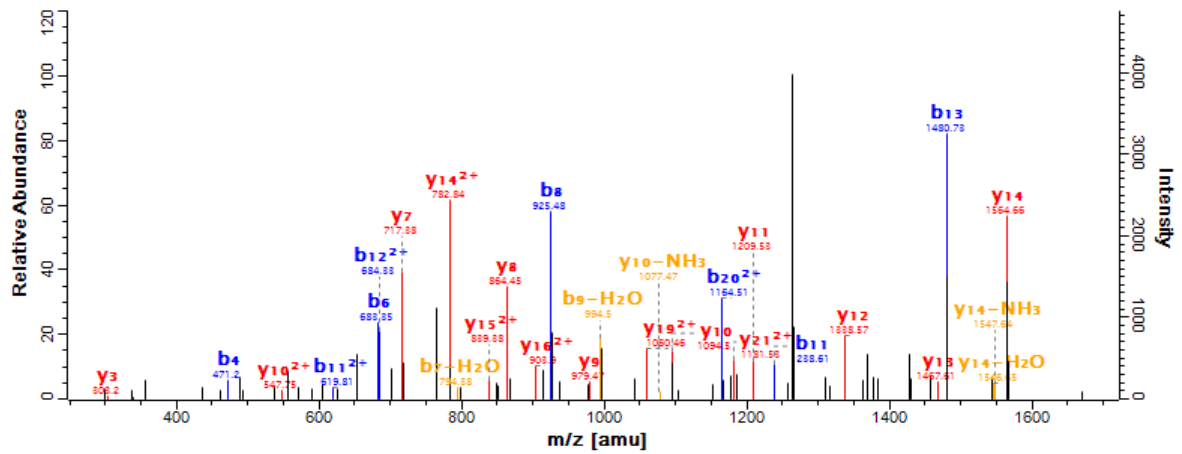

**Protein Group ID:** 236

**Protein Accession Numbers:** P48426; B4DGX2; Q5JUT3

**Gene Names:** PIP4K2A;PIP5K2A

**Peptide Sequence:** FGIDDQDFQNSLTR

**Total Number of Spectra:** 8

**Number of Replicates (out of 8):** 8

**Best Match Score:** 177.88

**Best Match Posterior Error Probability:** 8.74E-15

**Best Match Spectrum:**

**Scan number** 51377      **Raw file** A549-US-Mock-top20CID-Elite-2ug-B13  
**Method** ITMS; CID      **Genenames** PIP4K2A;PIP5K2A

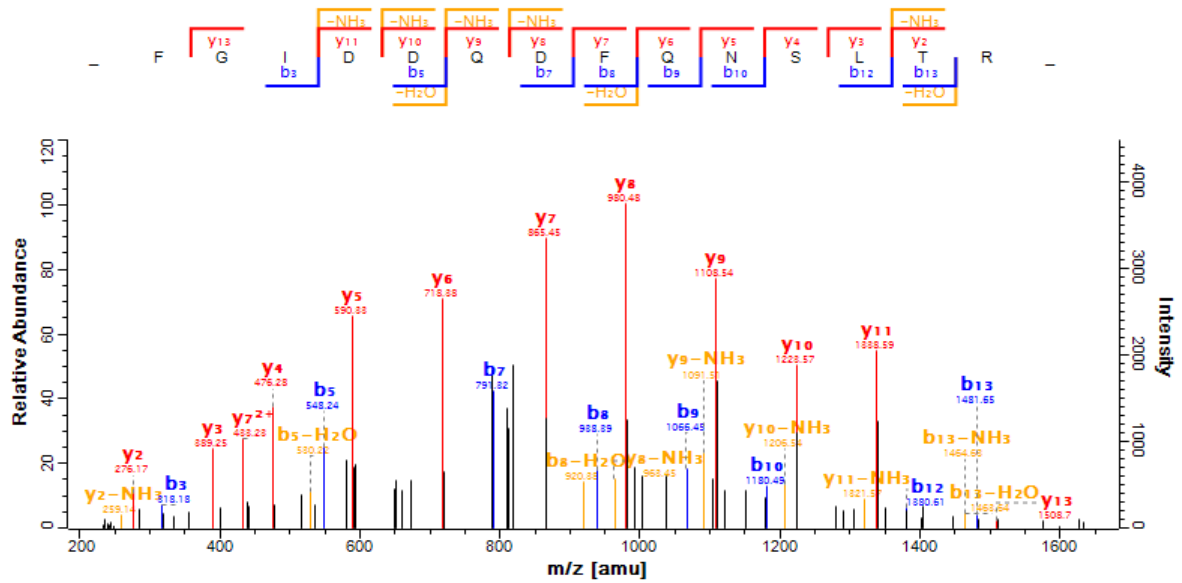

**Protein Group ID:** 238

**Protein Accession Numbers:** B4DSS8; Q9UKA9-3; Q9UKA9-4; Q9UKA9-2; Q9UKA9; Q9UKA9-6; Q9UKA9-5; B4DI28

**Gene Names:** PTBP2

**Peptide Sequence:** NQAFLELATEEEA A A I T M V N Y Y S A V T P H L R

**Total Number of Spectra:** 1

**Number of Replicates (out of 8):** 1

**Best Match Score:** 81.477

**Best Match Posterior Error Probability:** 0.0001648

**Best Match Spectrum:**

|                    |           |                  |                                     |
|--------------------|-----------|------------------|-------------------------------------|
| <b>Scan number</b> | 91535     | <b>Raw file</b>  | A549-US-Mock-top20CID-Elite-2ug-B11 |
| <b>Method</b>      | ITMS; CID | <b>Genenames</b> | PTBP2                               |

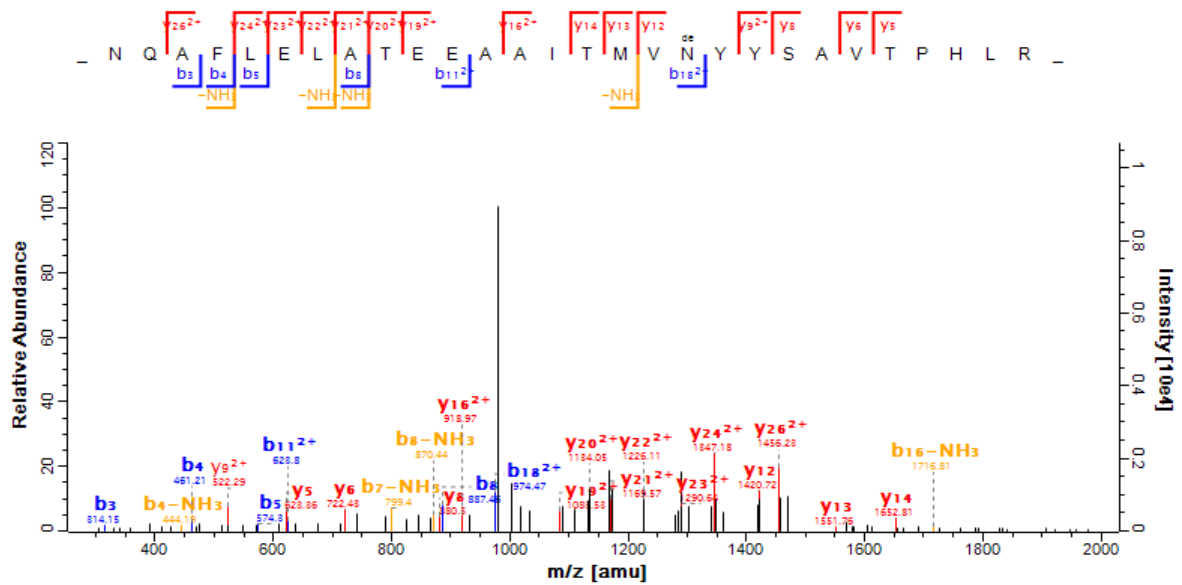

**Protein Group ID:** 241

**Protein Accession Numbers:** Q9NYJ8; B4DIR9; Q9NYJ8-2

**Gene Names:** TAB2

**Peptide Sequence:** TSSTSSSVNSQTLNR

**Total Number of Spectra:** 5

**Number of Replicates (out of 8):** 5

**Best Match Score:** 118.19

**Best Match Posterior Error Probability:** 6.76E-05

**Best Match Spectrum:**

|                    |           |                  |                                     |
|--------------------|-----------|------------------|-------------------------------------|
| <b>Scan number</b> | 8455      | <b>Raw file</b>  | A549-US-Mock-top20CID-Elite-2ug-B13 |
| <b>Method</b>      | ITMS; CID | <b>Genenames</b> | TAB2                                |

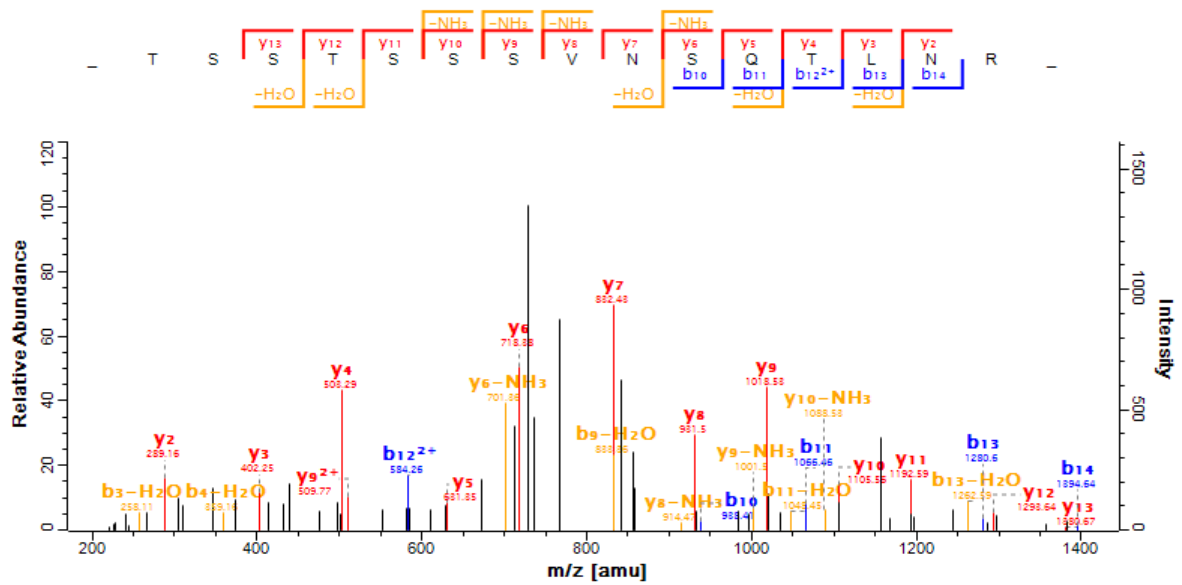

**Protein Group ID:** 242

**Protein Accession Numbers:** B4DIY7; C9J2U4; Q96BW9

**Gene Names:** TAMM41

**Peptide Sequence:** SPEGQFTQLMTPK

**Total Number of Spectra:** 2

**Number of Replicates (out of 8):** 2

**Best Match Score:** 107.35

**Best Match Posterior Error Probability:** 0.00021525

**Best Match Spectrum:**

|                    |           |                  |                                   |
|--------------------|-----------|------------------|-----------------------------------|
| <b>Scan number</b> | 61825     | <b>Raw file</b>  | A549-US-WT-top20CID-Elite-2ug-B14 |
| <b>Method</b>      | ITMS; CID | <b>Genenames</b> | TAMM41                            |

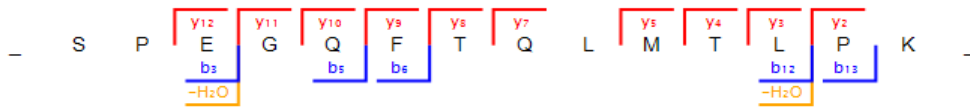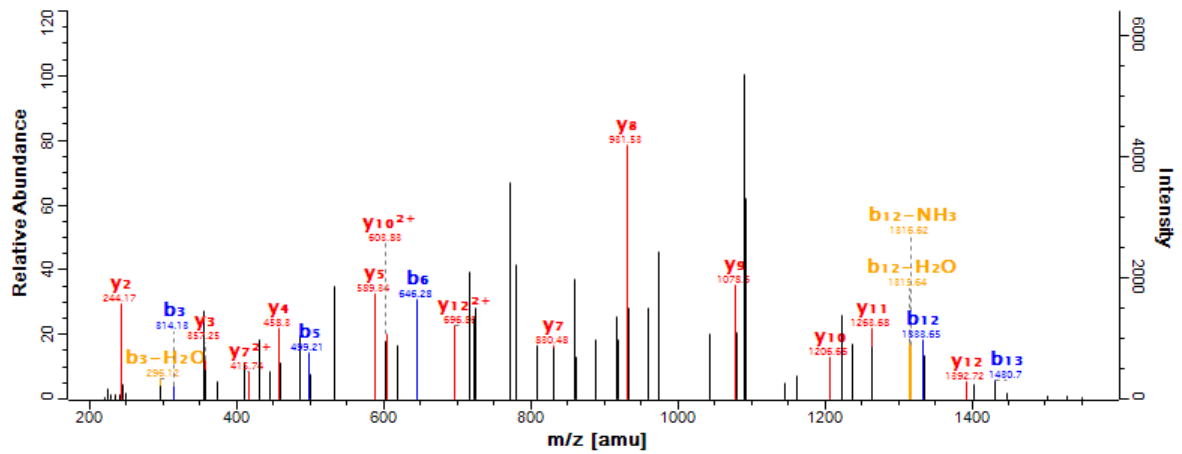

**Protein Group ID:** 244

**Protein Accession Numbers:** O75376; E7EVK1; B4DJ25

**Gene Names:** NCOR1

**Peptide Sequence:** SAAVSEQQLEQK

**Total Number of Spectra:** 4

**Number of Replicates (out of 8):** 4

**Best Match Score:** 105.95

**Best Match Posterior Error Probability:** 0.00039873

**Best Match Spectrum:**

|                    |           |                  |                                     |
|--------------------|-----------|------------------|-------------------------------------|
| <b>Scan number</b> | 10957     | <b>Raw file</b>  | A549-US-Mock-top20CID-Elite-2ug-B13 |
| <b>Method</b>      | ITMS; CID | <b>Genenames</b> | NCOR1                               |

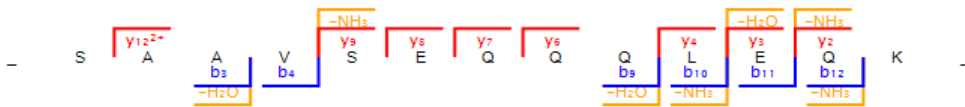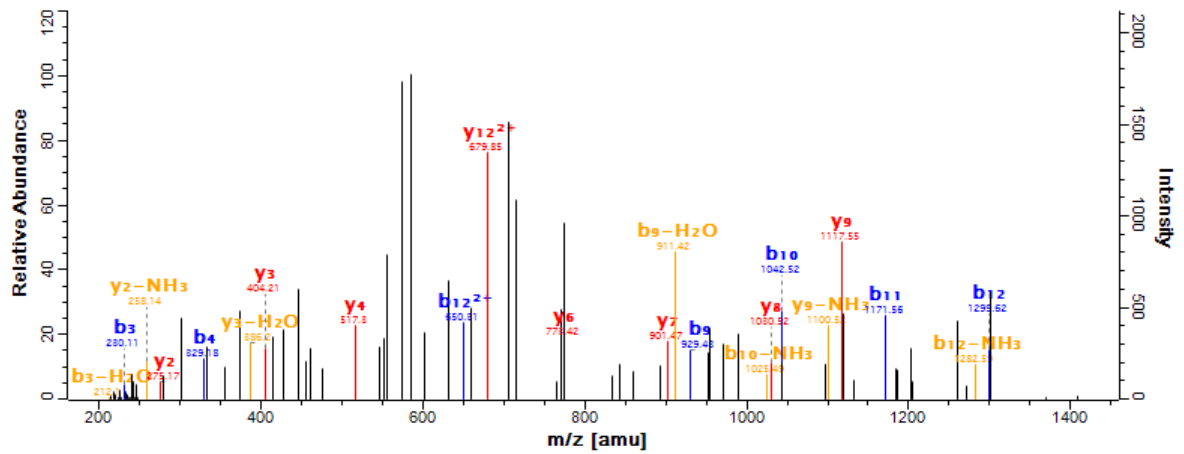

**Protein Group ID:** 245

**Protein Accession Numbers:** O15374; G3V175; B4DJ67; E7EPY8

**Gene Names:** SLC16A4

**Peptide Sequence:** GSSLSAHGPEAHATEETHCHETEEESTIK

**Total Number of Spectra:** 3

**Number of Replicates (out of 8):** 3

**Best Match Score:** 64.488

**Best Match Posterior Error Probability:** 0.00029726

**Best Match Spectrum:**

|                    |           |                  |                                     |
|--------------------|-----------|------------------|-------------------------------------|
| <b>Scan number</b> | 11934     | <b>Raw file</b>  | A549-US-Mock-top20CID-Elite-2ug-B13 |
| <b>Method</b>      | ITMS; CID | <b>Genenames</b> | SLC16A4                             |

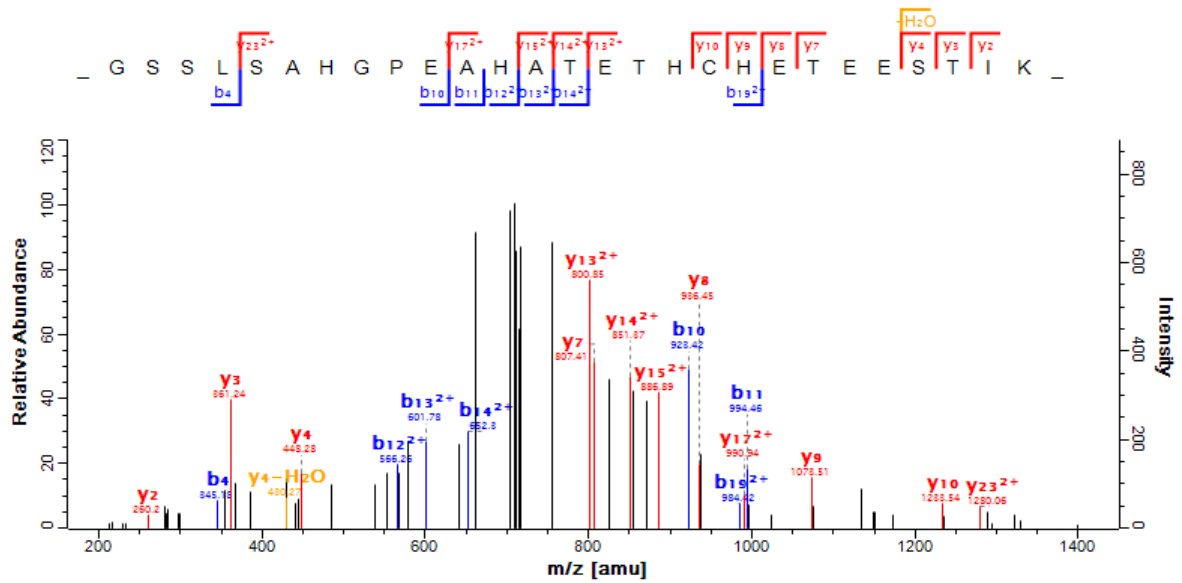

**Protein Group ID:** 251  
**Protein Accession Numbers:** Q9UGH3; B4DJZ1  
**Gene Names:** SLC23A2  
**Peptide Sequence:** SMEAGSSTEGKYEDEAK  
**Total Number of Spectra:** 10  
**Number of Replicates (out of 8):** 7  
**Best Match Score:** 213.49  
**Best Match Posterior Error Probability:** 1.52E-39  
**Best Match Spectrum:**

**Scan number** 11013      **Raw file** A549-US-WT-top20CID-Elite-2ug-B14  
**Method** ITMS; CID      **Genenames** SLC23A2

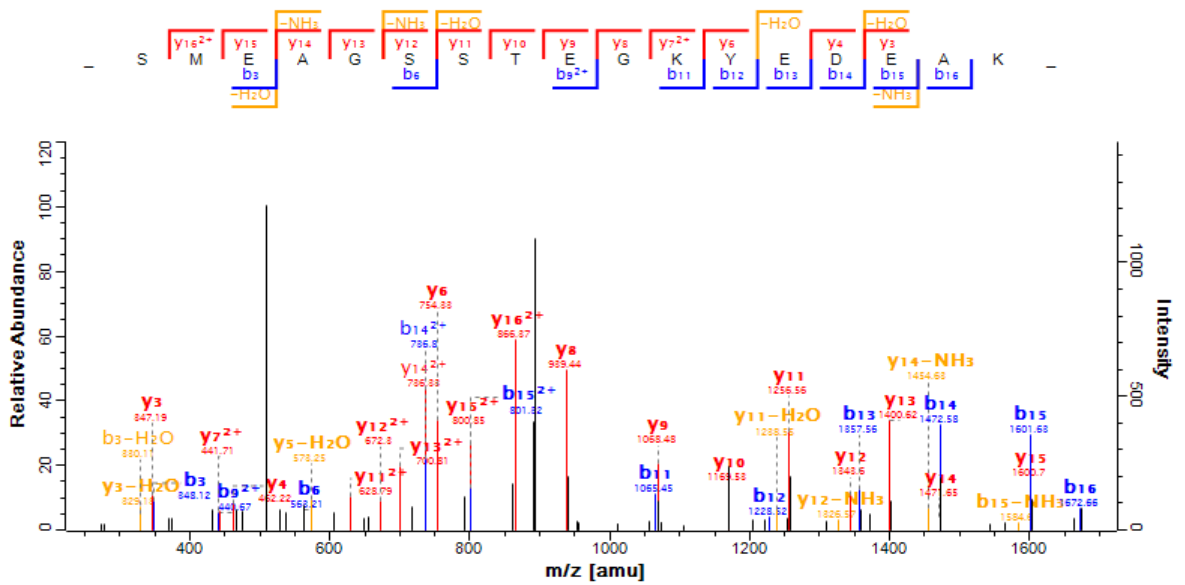



**Protein Group ID:** 261  
**Protein Accession Numbers:** B4DLE8  
**Gene Names:** CRYBG3  
**Peptide Sequence:** SAASVENEPMSTSQK  
**Total Number of Spectra:** 2  
**Number of Replicates (out of 8):** 2  
**Best Match Score:** 115.1  
**Best Match Posterior Error Probability:** 0.00085612  
**Best Match Spectrum:**

**Scan number** 11964      **Raw file** A549-US-WT-top20CID-Elite-2ug-B12  
**Method** ITMS; CID      **Genenames** CRYBG3

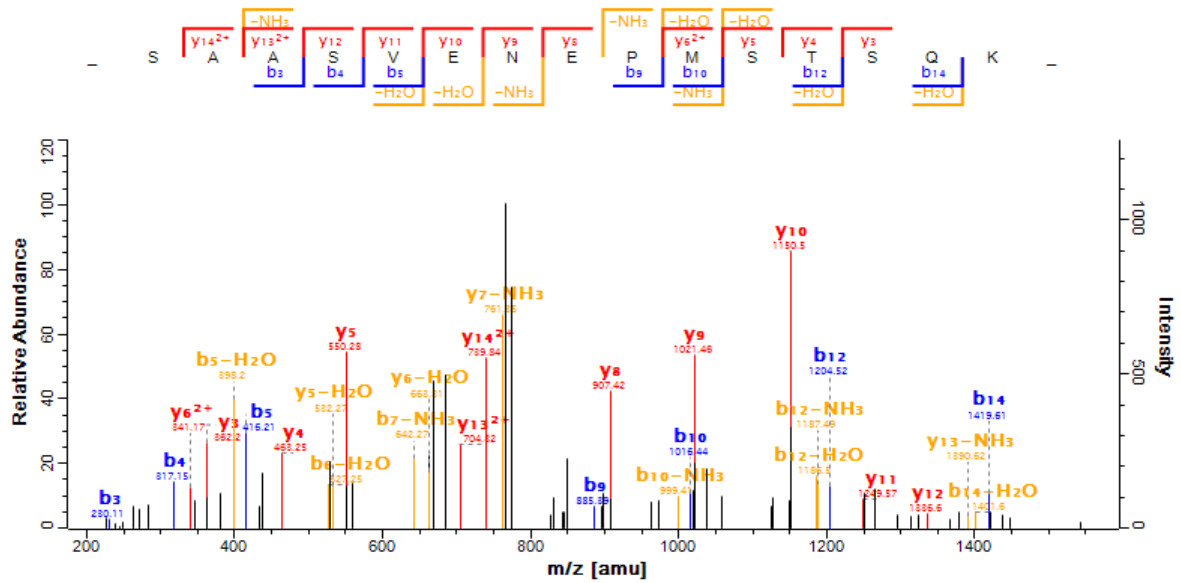

**Protein Group ID:** 263

**Protein Accession Numbers:** Q96RN5; Q96RN5-2; G3V1P5; Q96RN5-3; F5GZU5; H7C308; B4DM43

**Gene Names:** MED15

**Peptide Sequence:** LHHQNQQQIQQQQQQLQR

**Total Number of Spectra:** 4

**Number of Replicates (out of 8):** 3

**Best Match Score:** 138.19

**Best Match Posterior Error Probability:** 2.05E-05

**Best Match Spectrum:**

|                    |           |                  |                                   |
|--------------------|-----------|------------------|-----------------------------------|
| <b>Scan number</b> | 9115      | <b>Raw file</b>  | A549-US-WT-top20CID-Elite-2ug-B12 |
| <b>Method</b>      | ITMS: CID | <b>Genenames</b> | MED15                             |

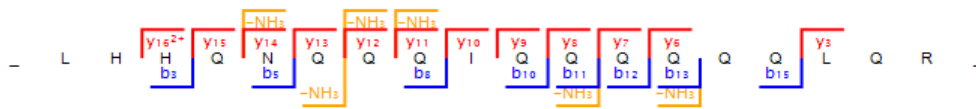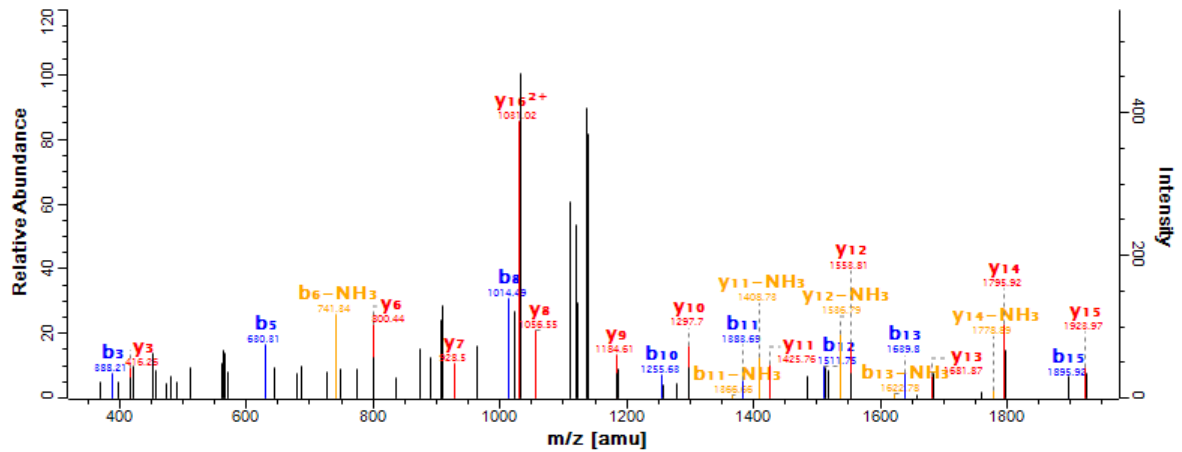

**Protein Group ID:** 265

**Protein Accession Numbers:** E9PN70; Q9Y296; J3KP27; E9PQE8; B4DME1; E9PKS9; G5EA23; G3V1A0

**Gene Names:** TRAPPC4

**Peptide Sequence:** AGGLIYQLDSYAPR

**Total Number of Spectra:** 3

**Number of Replicates (out of 8):** 3

**Best Match Score:** 153.39

**Best Match Posterior Error Probability:** 3.70E-11

**Best Match Spectrum:**

|                    |           |                  |                                   |
|--------------------|-----------|------------------|-----------------------------------|
| <b>Scan number</b> | 60216     | <b>Raw file</b>  | A549-US-WT-top20CID-Elite-2ug-B12 |
| <b>Method</b>      | ITMS; CID | <b>Genenames</b> | TRAPPC4                           |

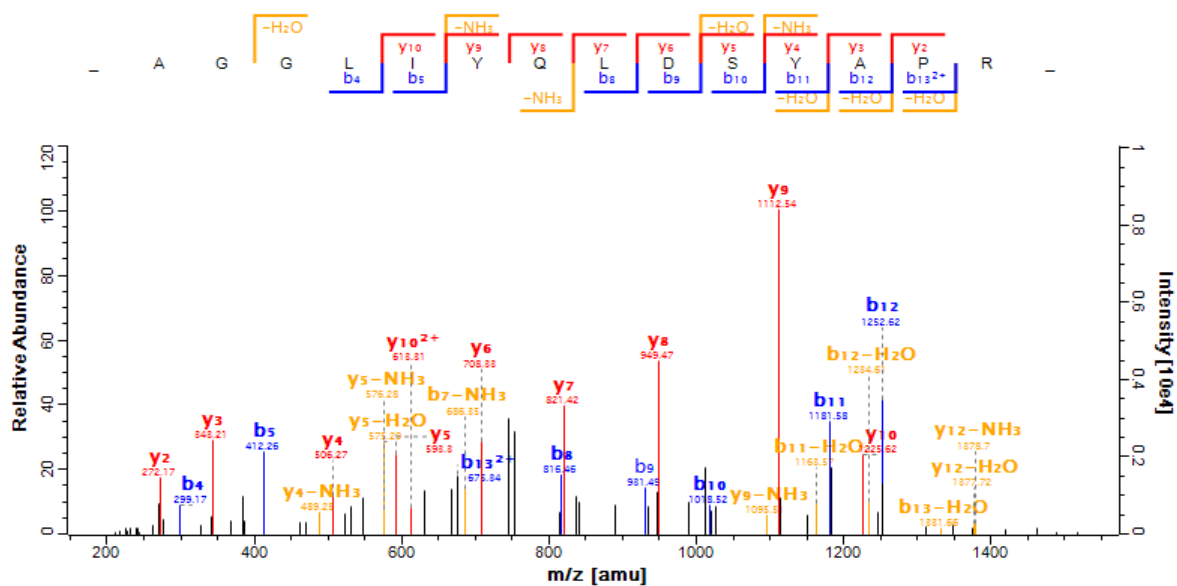

**Protein Group ID:** 269

**Protein Accession Numbers:** Q06136; B4DMX0; K7EQS7

**Gene Names:** KDSR

**Peptide Sequence:** E I E M H S I N D K

**Total Number of Spectra:** 2

**Number of Replicates (out of 8):** 2

**Best Match Score:** 83.499

**Best Match Posterior Error Probability:** 0.0037103

**Best Match Spectrum:**

**Scan number** 14151      **Raw file** A549-US-WT-top20CID-Elite-2ug-B13  
**Method** ITMS; CID      **Genenames** KDSR

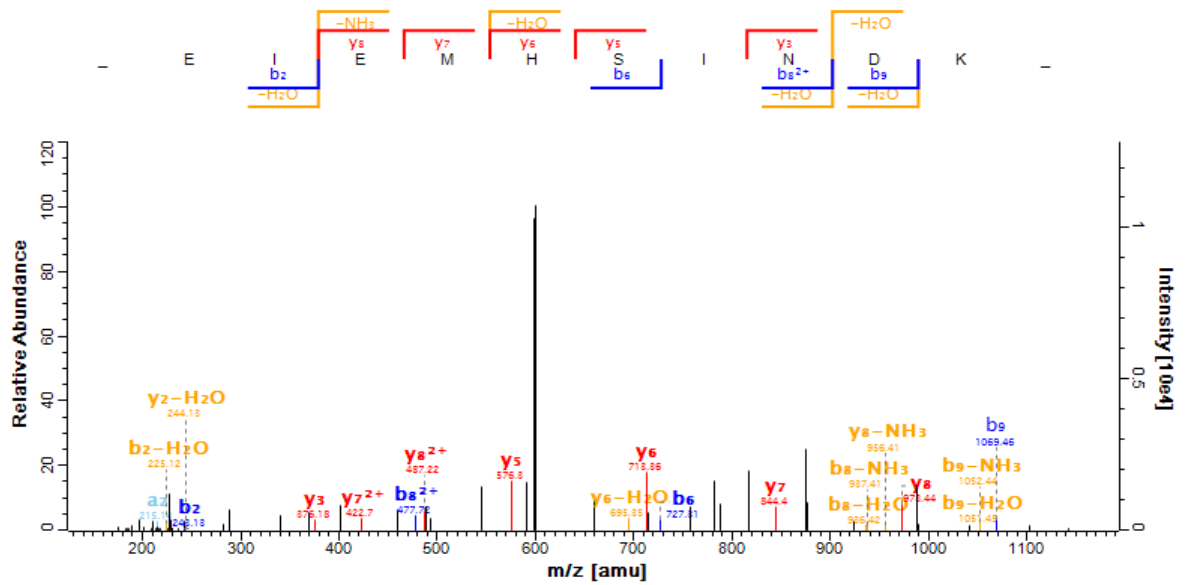

**Protein Group ID:** 277

**Protein Accession Numbers:** Q9NVM9; B4DNK1; H0YH12

**Gene Names:** Asun;ASUN

**Peptide Sequence:** GPVSLLSLWSNR

**Total Number of Spectra:** 2

**Number of Replicates (out of 8):** 2

**Best Match Score:** 142.97

**Best Match Posterior Error Probability:** 2.47E-05

**Best Match Spectrum:**

|                    |           |                  |                                     |
|--------------------|-----------|------------------|-------------------------------------|
| <b>Scan number</b> | 74073     | <b>Raw file</b>  | A549-US-Mock-top20CID-Elite-2ug-B14 |
| <b>Method</b>      | ITMS; CID | <b>Genenames</b> | Asun;ASUN                           |

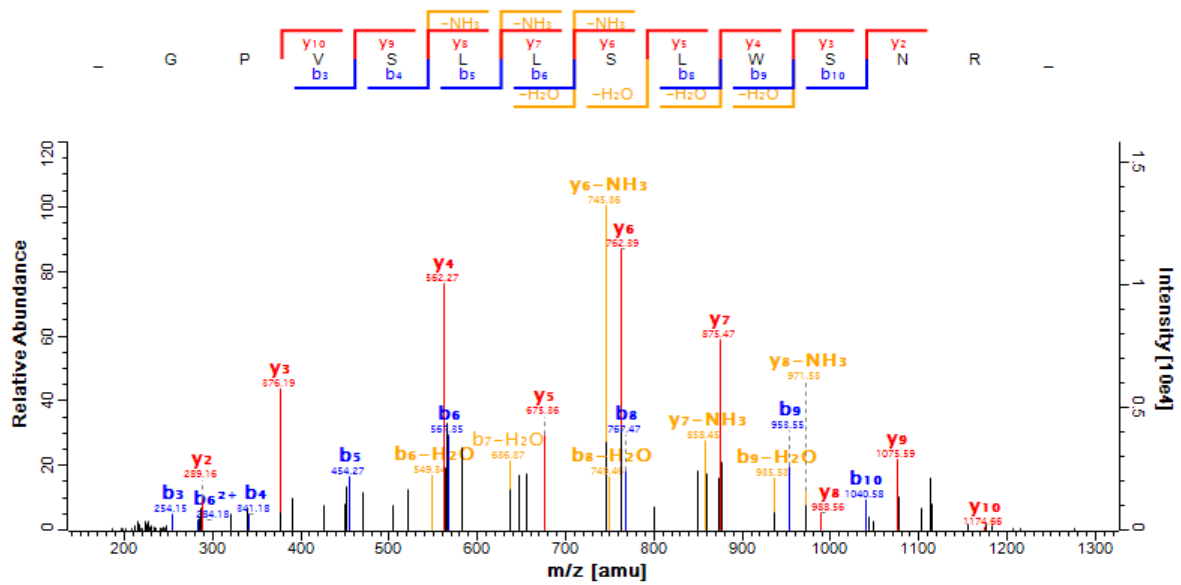

**Protein Group ID:** 278

**Protein Accession Numbers:** J9JID1; Q96GD4; Q96GD4-2; B4DNM4; J3QLN8; J3KTD6; J3QR41; Q96GD4-3; J3KRF8; J3KRJ2

**Gene Names:** AURKB

**Peptide Sequence:** VMENSSGTPDILTR

**Total Number of Spectra:** 2

**Number of Replicates (out of 8):** 2

**Best Match Score:** 139.66

**Best Match Posterior Error Probability:** 2.22E-05

**Best Match Spectrum:**

|                    |           |                  |                                     |
|--------------------|-----------|------------------|-------------------------------------|
| <b>Scan number</b> | 32040     | <b>Raw file</b>  | A549-US-Mock-top20CID-Elite-2ug-B13 |
| <b>Method</b>      | ITMS; CID | <b>Genenames</b> | AURKB                               |

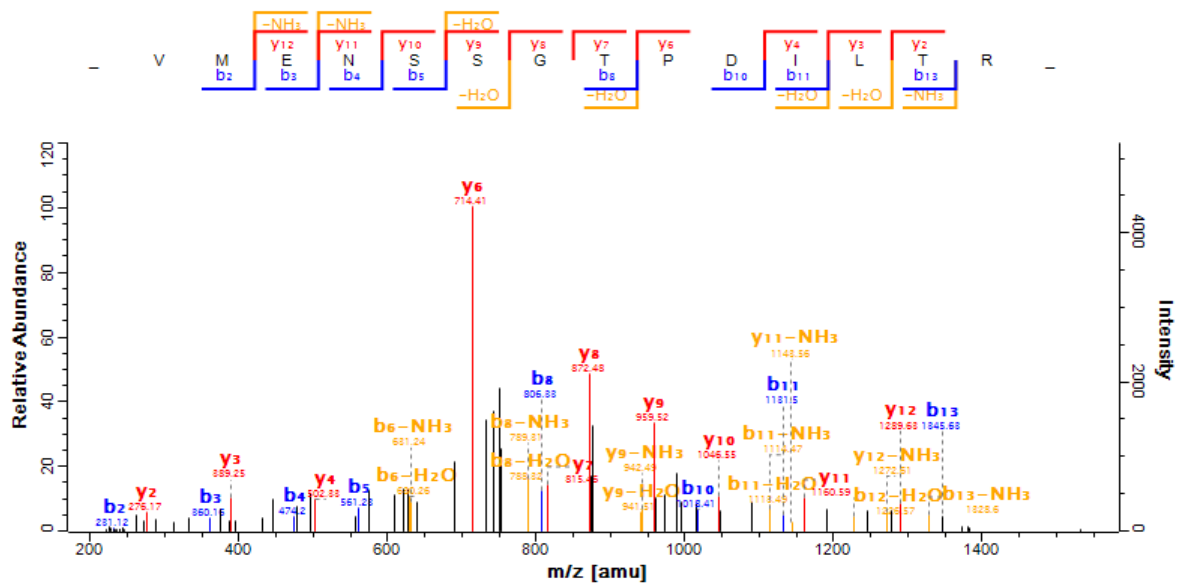

**Protein Group ID:** 294

**Protein Accession Numbers:** Q8IW45-2; Q8IW45; Q8IW45-4; B4DQR1; Q8IW45-3

**Gene Names:** CAR KD

**Peptide Sequence:** LSQALGNVTVVQK

**Total Number of Spectra:** 3

**Number of Replicates (out of 8):** 3

**Best Match Score:** 142.1

**Best Match Posterior Error Probability:** 1.37E-05

**Best Match Spectrum:**

|                    |           |                  |                                     |
|--------------------|-----------|------------------|-------------------------------------|
| <b>Scan number</b> | 30514     | <b>Raw file</b>  | A549-US-Mock-top20CID-Elite-2ug-B11 |
| <b>Method</b>      | ITMS; CID | <b>Genenames</b> | CAR KD                              |

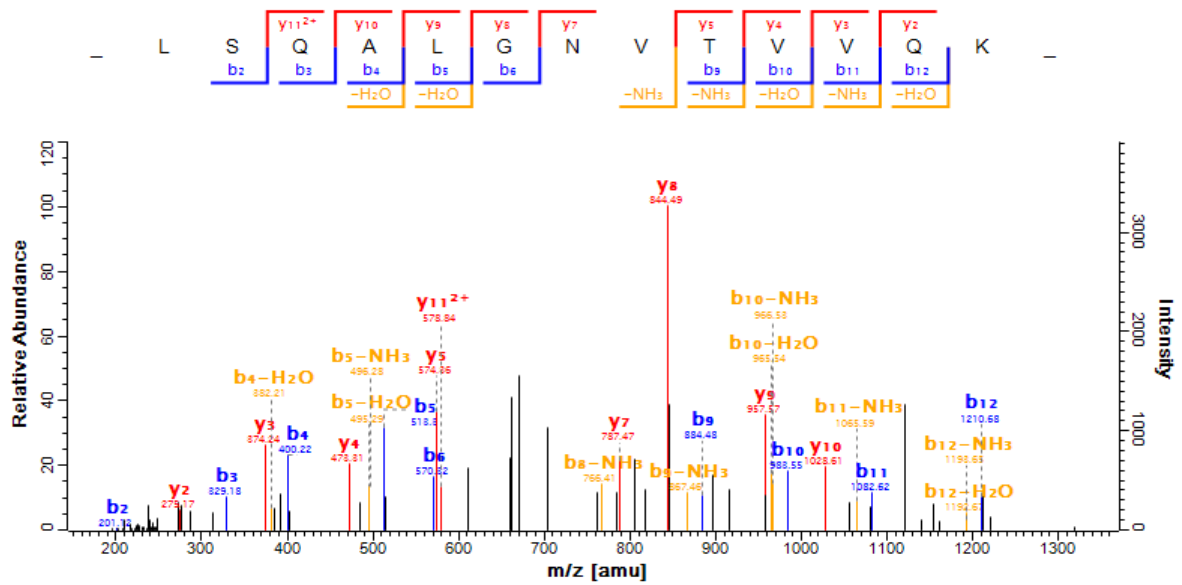

**Protein Group ID:** 295

**Protein Accession Numbers:** B4DR52; Q5QNW6-2; O60814; P57053; P58876; P62807; Q5QNW6; Q93079; Q99877; Q99879; Q99880

**Gene Names:**

HIST2H2BF; HIST1H2BK; H2BFS; HIST1H2BD; HIST1H2BC; HIST1H2BH; HIST1H2BN; HIST1H2BM; HIST1H2BL

**Peptide Sequence:** KESYSVYVYK

**Total Number of Spectra:** 6

**Number of Replicates (out of 8):** 6

**Best Match Score:** 132.25

**Best Match Posterior Error Probability:** 3.75E-05

**Best Match Spectrum:**

**Scan number** 23082      **Raw file** A549-US-WT-top20CID-Elite-2ug-B11  
**Method** ITMS: CID      **Genenames** HIST2H2BF; HIST1H2BK; H2BFS; HIST1H2BD; HIST1H2BC; HIST1H2BH; HIST1H2BN; HIST1H2BM; HIST1H2BL

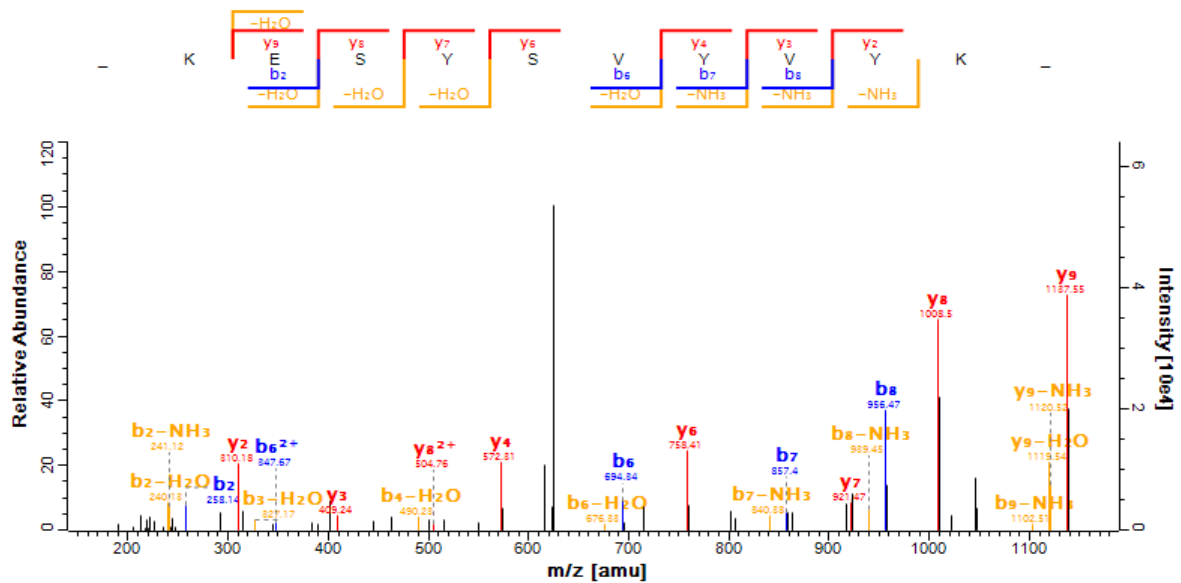



**Protein Group ID:** 301

**Protein Accession Numbers:** Q5W0Z9; Q5W0Z9-3; Q2TB82; B4DRN8

**Gene Names:** ZDHHC20

**Peptide Sequence:** LVGMDEQASVTNNEYAR

**Total Number of Spectra:** 2

**Number of Replicates (out of 8):** 2

**Best Match Score:** 120.92

**Best Match Posterior Error Probability:** 9.41E-08

**Best Match Spectrum:**

**Scan number** 35621      **Raw file** A549-US-Mock-top20CID-Elite-2ug-B11  
**Method** ITMS; CID      **Genenames** ZDHHC20

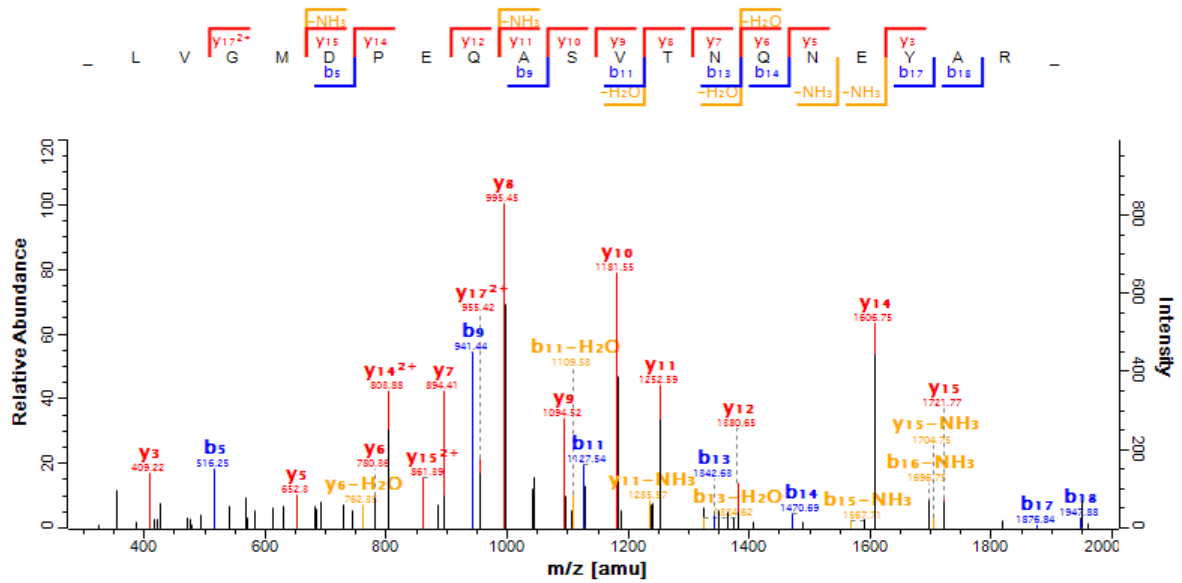

**Protein Group ID:** 303

**Protein Accession Numbers:** Q96J42; H0Y997; Q96J42-2; B4DS52; D6RB48; D6RBD9

**Gene Names:** TXNDC15

**Peptide Sequence:** VSSEPSGVTCGAGGAEDSR

**Total Number of Spectra:** 10

**Number of Replicates (out of 8):** 6

**Best Match Score:** 172.97

**Best Match Posterior Error Probability:** 3.29E-16

**Best Match Spectrum:**

**Scan number** 11788      **Raw file** A549-US-WT-top20CID-Elite-2ug-B13  
**Method** ITMS; CID      **Genenames** TXNDC15

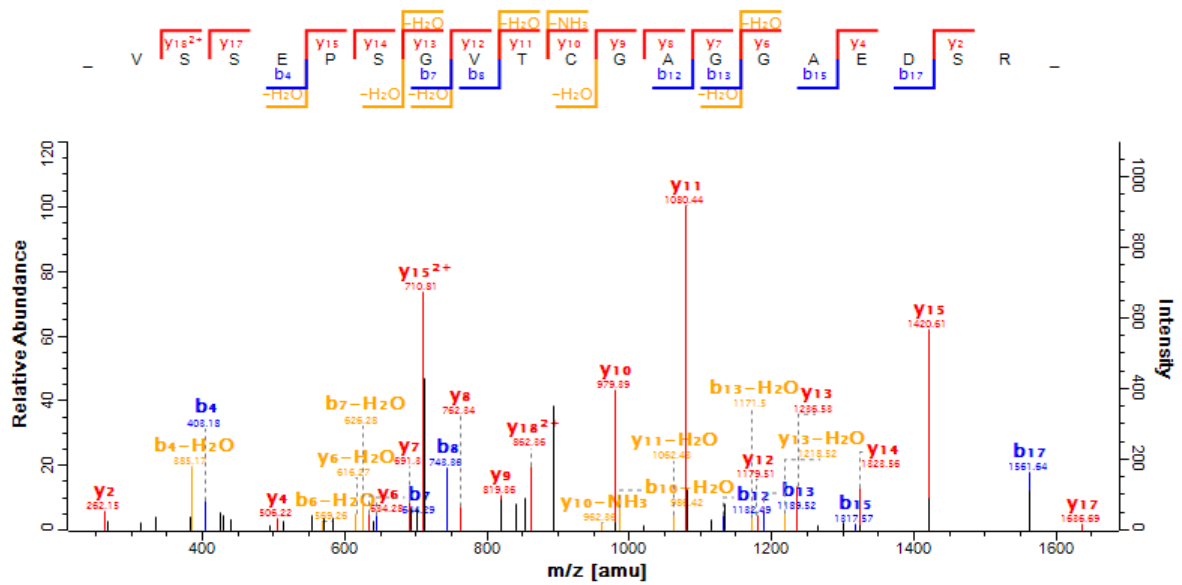

**Protein Group ID:** 306  
**Protein Accession Numbers:** O15066; B4DSR5  
**Gene Names:** KIF3B  
**Peptide Sequence:** SGSSSSSGTTPASQLYPQSR  
**Total Number of Spectra:** 1  
**Number of Replicates (out of 8):** 1  
**Best Match Score:** 77.391  
**Best Match Posterior Error Probability:** 0.00066478  
**Best Match Spectrum:**

**Scan number** 22397      **Raw file** A549-US-WT-top20CID-Elite-2ug-B13  
**Method** ITMS; CID      **Genenames** KIF3B

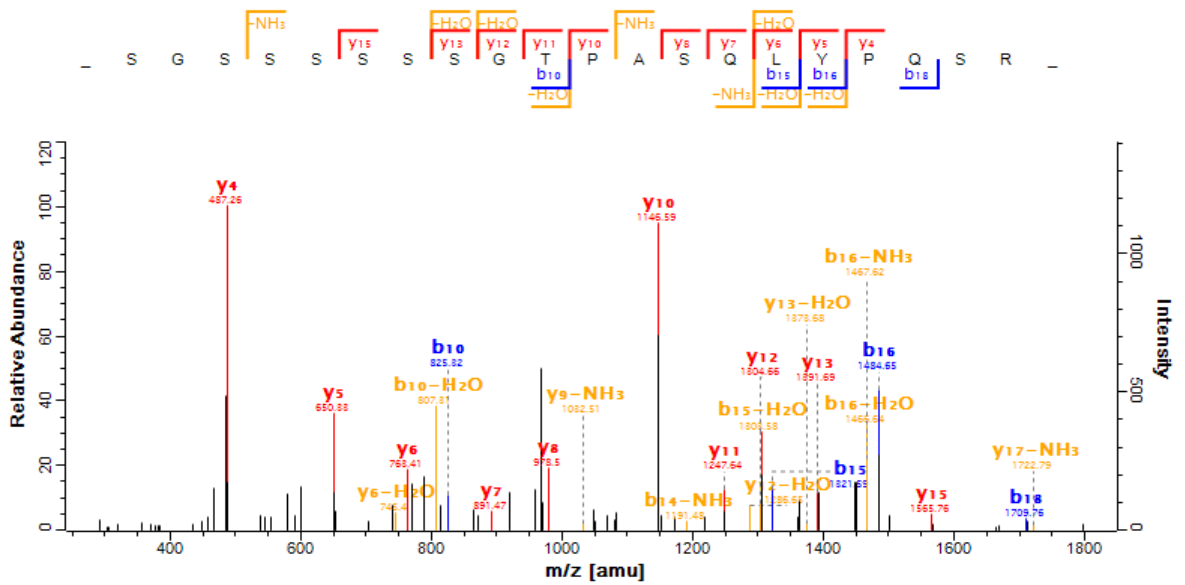

**Protein Group ID:** 308

**Protein Accession Numbers:** Q9HAD4; B4DT55; H0Y9Z3

**Gene Names:** WDR41

**Peptide Sequence:** LVAPTEGSLLEWDLILVEVK

**Total Number of Spectra:** 7

**Number of Replicates (out of 8):** 7

**Best Match Score:** 114.59

**Best Match Posterior Error Probability:** 0.00010548

**Best Match Spectrum:**

|                    |           |                  |                                     |
|--------------------|-----------|------------------|-------------------------------------|
| <b>Scan number</b> | 76997     | <b>Raw file</b>  | A549-US-Mock-top20CID-Elite-2ug-B14 |
| <b>Method</b>      | ITMS; CID | <b>Genenames</b> | WDR41                               |

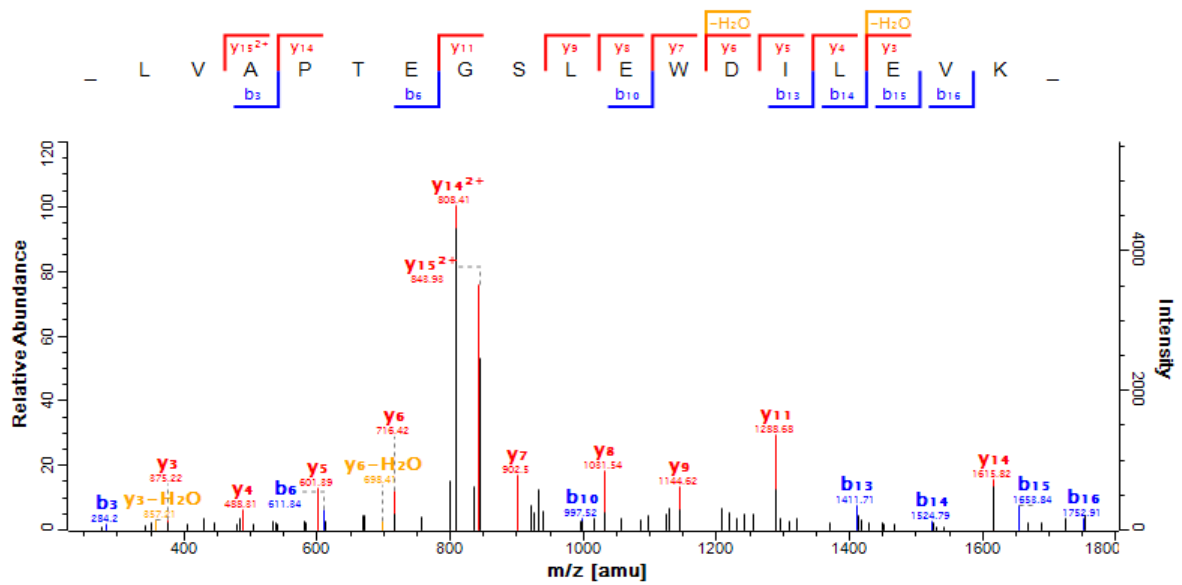

**Protein Group ID:** 311

**Protein Accession Numbers:** O15162; C9J7K9; C9J9P4; B4DTE8; H7C5I5

**Gene Names:** PLSCR1

**Peptide Sequence:** SLDEQC**V**VGK

**Total Number of Spectra:** 1

**Number of Replicates (out of 8):** 1

**Best Match Score:** 99.973

**Best Match Posterior Error Probability:** 0.0029173

**Best Match Spectrum:**

|                    |           |                  |                                   |
|--------------------|-----------|------------------|-----------------------------------|
| <b>Scan number</b> | 15966     | <b>Raw file</b>  | A549-US-WT-top20CID-Elite-2ug-B13 |
| <b>Method</b>      | ITMS; CID | <b>Genenames</b> | PLSCR1                            |

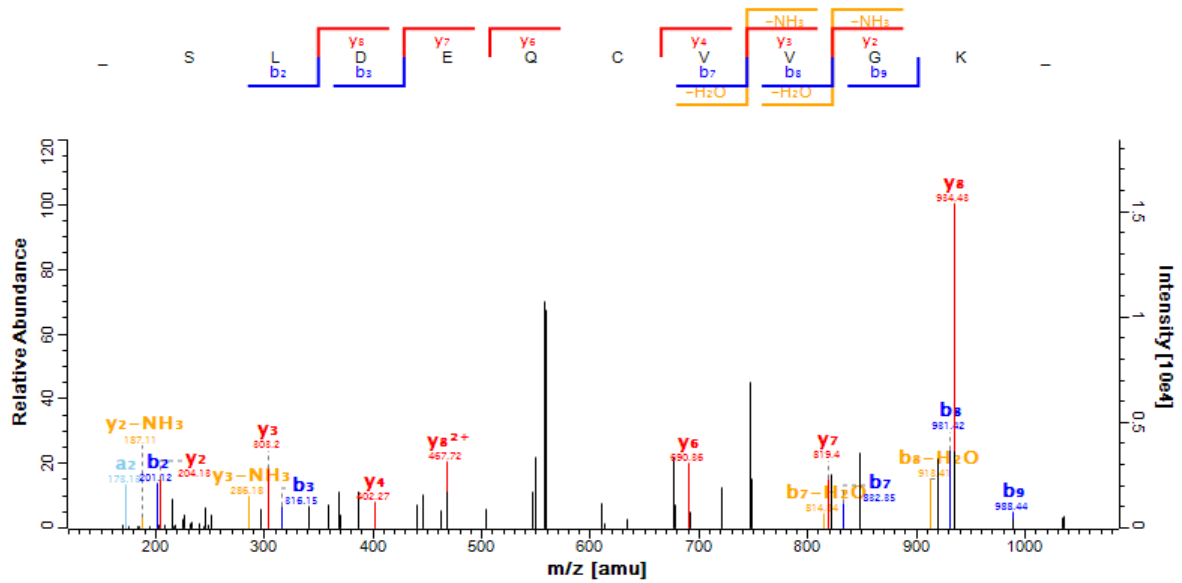

**Protein Group ID:** 318

**Protein Accession Numbers:** Q9P2K3-3; Q9P2K3; Q9P2K3-4; Q9P2K3-2; B4DV59; E9PQE5; E9PR63

**Gene Names:** RCOR3

**Peptide Sequence:** HGYNVEQALGMLFWHK

**Total Number of Spectra:** 4

**Number of Replicates (out of 8):** 4

**Best Match Score:** 129.01

**Best Match Posterior Error Probability:** 6.25E-05

**Best Match Spectrum:**

|                    |           |                  |                                     |
|--------------------|-----------|------------------|-------------------------------------|
| <b>Scan number</b> | 79717     | <b>Raw file</b>  | A549-US-Mock-top20CID-Elite-2ug-B14 |
| <b>Method</b>      | ITMS; CID | <b>Genenames</b> | RCOR3                               |

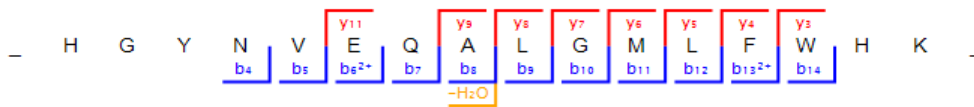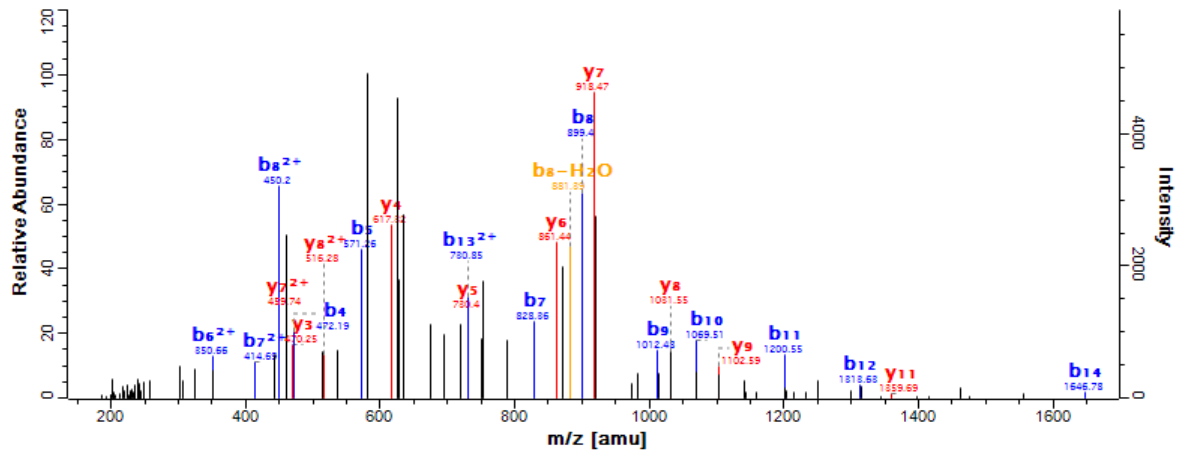

**Protein Group ID:** 323

**Protein Accession Numbers:** Q96F24; B4DWS0

**Gene Names:** NRBF2

**Peptide Sequence:** DAAHLQTSHKPSAEAEQGSPLEYSQK

**Total Number of Spectra:** 1

**Number of Replicates (out of 8):** 1

**Best Match Score:** 76.744

**Best Match Posterior Error Probability:** 0.00054698

**Best Match Spectrum:**

**Scan number** 20267      **Raw file** A549-US-WT-top20CID-Elite-2ug-B13  
**Method** ITMS; CID      **Genenames** NRBF2

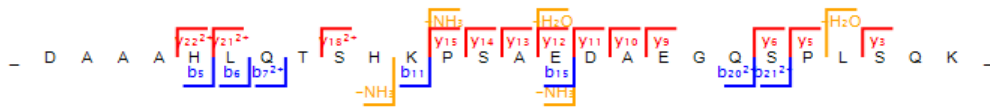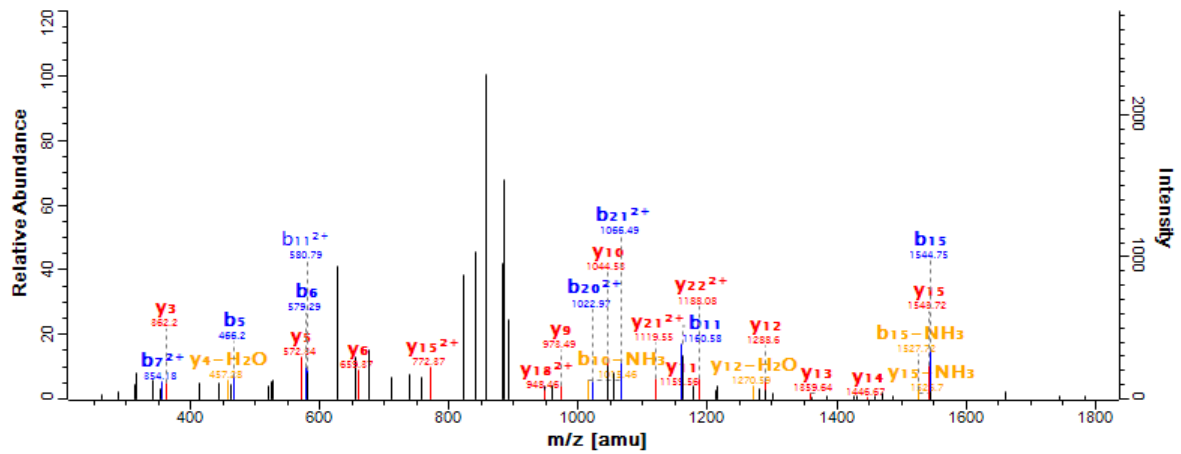

**Protein Group ID:** 325

**Protein Accession Numbers:** Q9Y5B8; Q9Y5B8-2; B4DXC8; E9PNU1

**Gene Names:** NME7

**Peptide Sequence:** YDNLHLEDLFIGNK

**Total Number of Spectra:** 5

**Number of Replicates (out of 8):** 5

**Best Match Score:** 183.89

**Best Match Posterior Error Probability:** 4.06E-19

**Best Match Spectrum:**

**Scan number** 62501      **Raw file** A549-US-Mock-top20CID-Elite-2ug-B11  
**Method** ITMS; CID      **Genenames** NME7

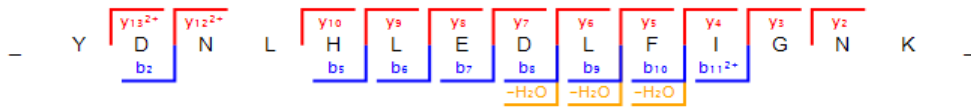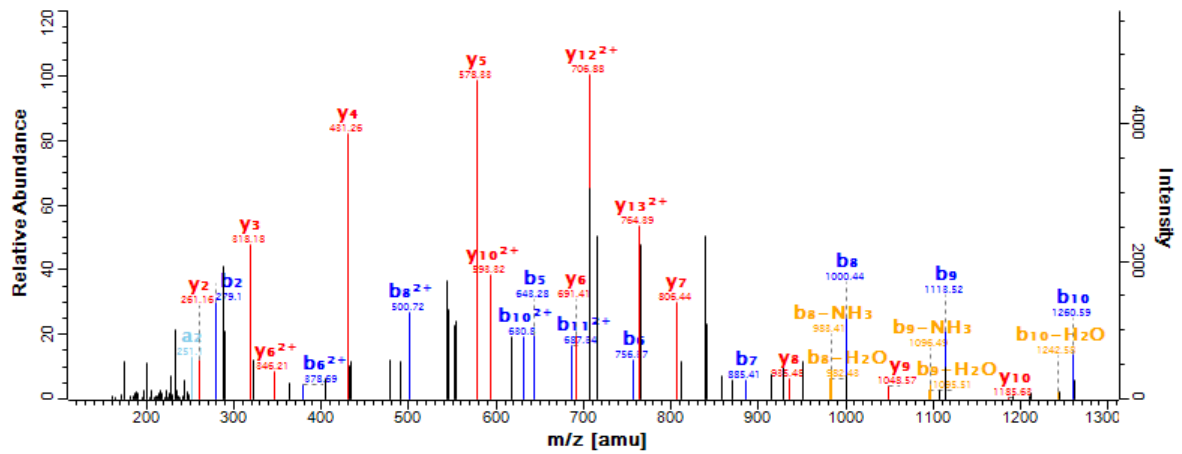



**Protein Group ID:** 330

**Protein Accession Numbers:** P36897-2; P36897; B4DY26; P36897-3

**Gene Names:** TGFBR1

**Peptide Sequence:** TLSQLSQQEGIK

**Total Number of Spectra:** 1

**Number of Replicates (out of 8):** 1

**Best Match Score:** 112.44

**Best Match Posterior Error Probability:** 0.00023048

**Best Match Spectrum:**

|                    |           |                  |                                     |
|--------------------|-----------|------------------|-------------------------------------|
| <b>Scan number</b> | 25095     | <b>Raw file</b>  | A549-US-Mock-top20CID-Elite-2ug-B11 |
| <b>Method</b>      | ITMS; CID | <b>Genenames</b> | TGFBR1                              |

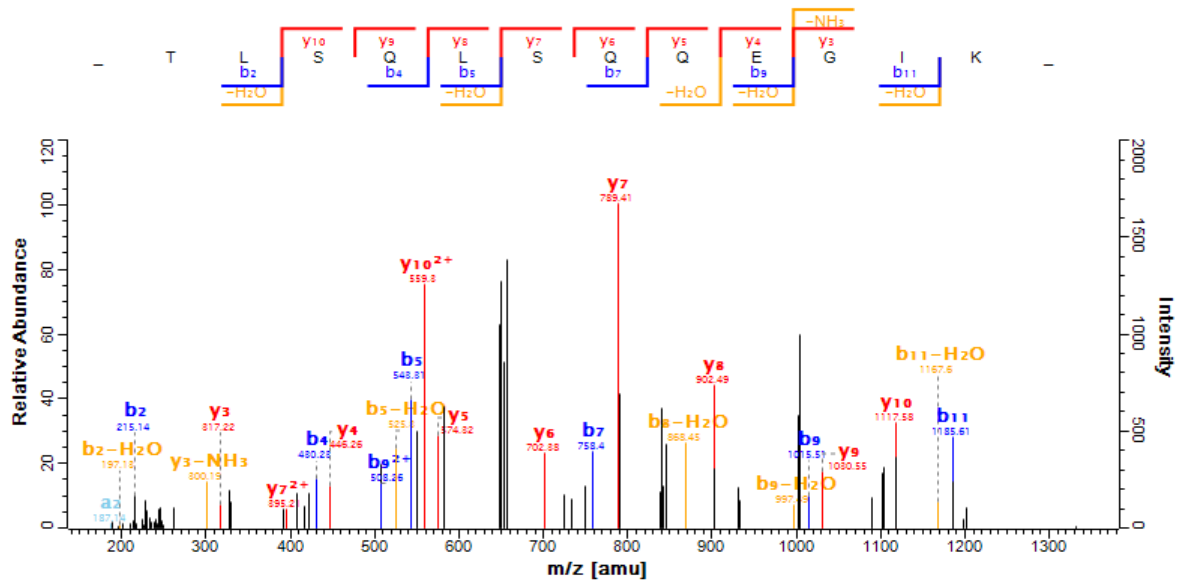

**Protein Group ID:** 332  
**Protein Accession Numbers:** P78504; B4DYR1  
**Gene Names:** JAG1  
**Peptide Sequence:** TCQLDANECEAK  
**Total Number of Spectra:** 2  
**Number of Replicates (out of 8):** 2  
**Best Match Score:** 92.039  
**Best Match Posterior Error Probability:** 0.0012267  
**Best Match Spectrum:**

**Scan number** 8577      **Raw file** A549-US-Mock-top20CID-Elite-2ug-B14  
**Method** ITMS; CID      **Genenames** JAG1

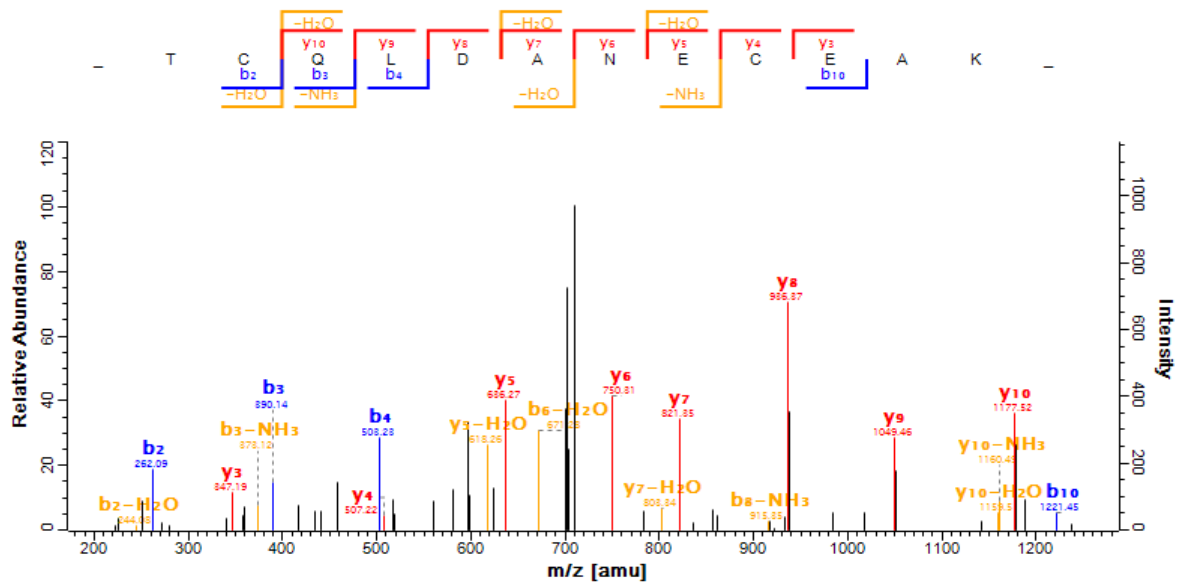

**Protein Group ID:** 333  
**Protein Accession Numbers:** Q8IYM0; B4DZ15  
**Gene Names:** FAM186B  
**Peptide Sequence:** QVEILGGR  
**Total Number of Spectra:** 1  
**Number of Replicates (out of 8):** 1  
**Best Match Score:** 106.36  
**Best Match Posterior Error Probability:** 0.003812  
**Best Match Spectrum:**

**Scan number** 18081      **Raw file** A549-US-Mock-top20CID-Elite-2ug-B11  
**Method** ITMS; CID      **Genenames** FAM186B

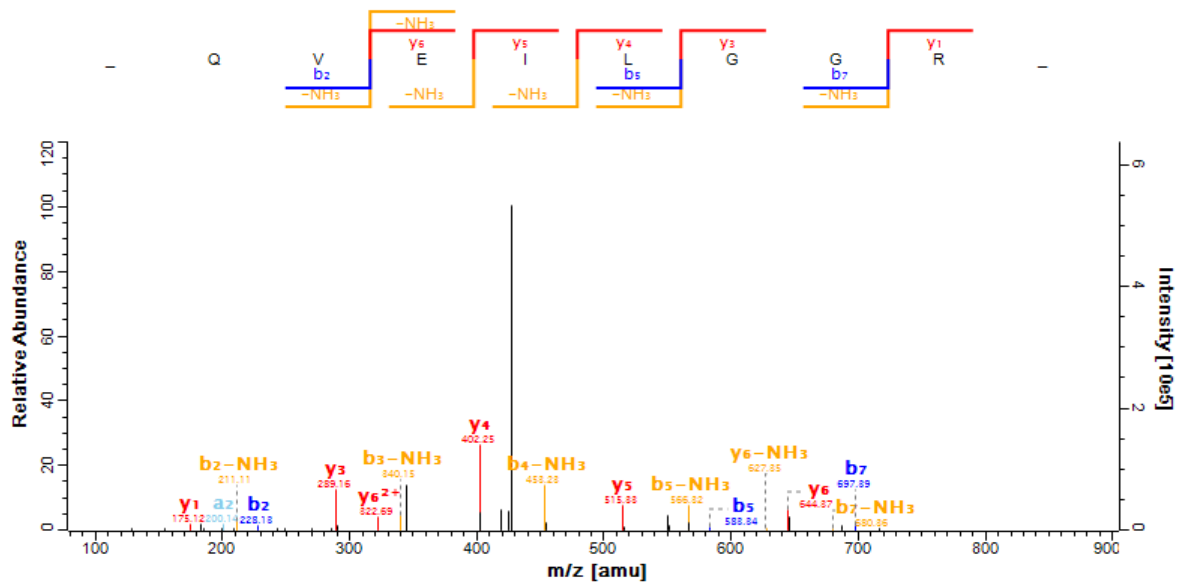

**Protein Group ID:** 337

**Protein Accession Numbers:** B4E040; P11234; Q6ZS74; C9J6B1

**Gene Names:** RALB

**Peptide Sequence:** AEEWGVQYVETSAK

**Total Number of Spectra:** 8

**Number of Replicates (out of 8):** 8

**Best Match Score:** 157.35

**Best Match Posterior Error Probability:** 2.39E-09

**Best Match Spectrum:**

**Scan number** 43249      **Raw file** A549-US-Mock-top20CID-Elite-2ug-B12  
**Method** ITMS; CID      **Genenames** RALB

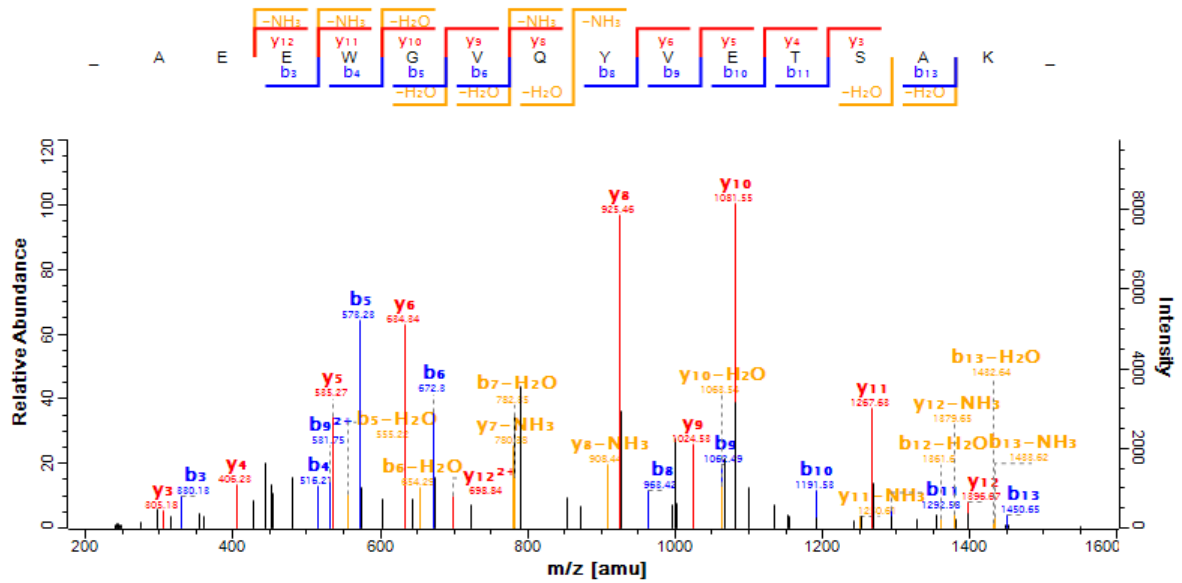

**Protein Group ID:** 338

**Protein Accession Numbers:** Q9NVF7; E9PEM8; B4E0H5

**Gene Names:** FBXO28

**Peptide Sequence:** MAEEGGGGQGDGGSSLASGSTQR

**Total Number of Spectra:** 4

**Number of Replicates (out of 8):** 3

**Best Match Score:** 158.52

**Best Match Posterior Error Probability:** 6.38E-19

**Best Match Spectrum:**

|                    |           |                  |                                     |
|--------------------|-----------|------------------|-------------------------------------|
| <b>Scan number</b> | 11372     | <b>Raw file</b>  | A549-US-Mock-top20CID-Elite-2ug-B14 |
| <b>Method</b>      | ITMS; CID | <b>Genenames</b> | FBXO28                              |

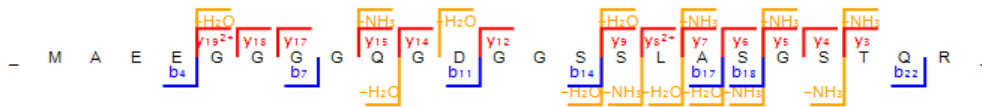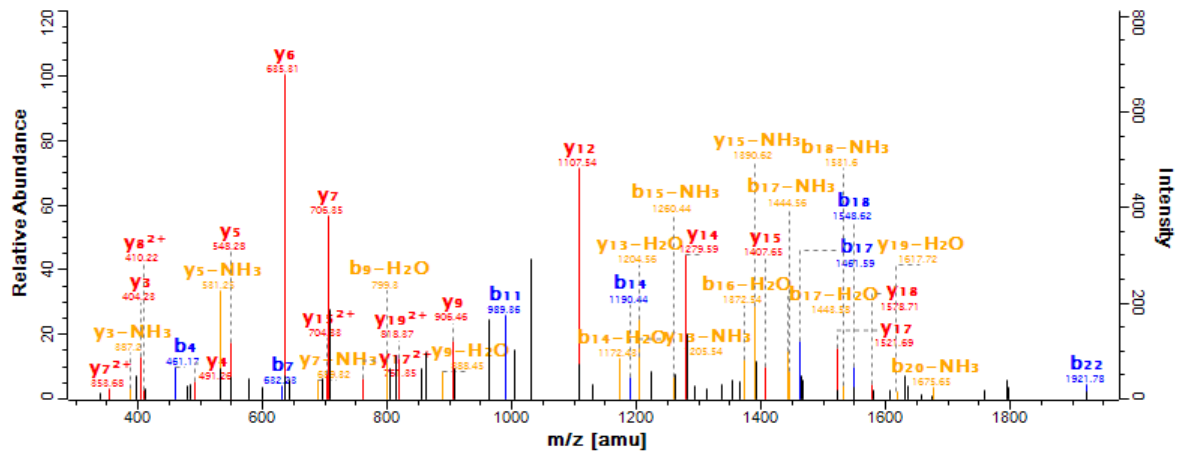

**Protein Group ID:** 342

**Protein Accession Numbers:** Q9BUN8; Q9BUN8-2; B4E1G1; E5RGY0

**Gene Names:** DERL1

**Peptide Sequence:** NFLSTPQFLYR

**Total Number of Spectra:** 8

**Number of Replicates (out of 8):** 8

**Best Match Score:** 164.04

**Best Match Posterior Error Probability:** 8.91E-06

**Best Match Spectrum:**

**Scan number** 63624      **Raw file** A549-US-WT-top20CID-Elite-2ug-B11  
**Method** ITMS; CID      **Genenames** DERL1

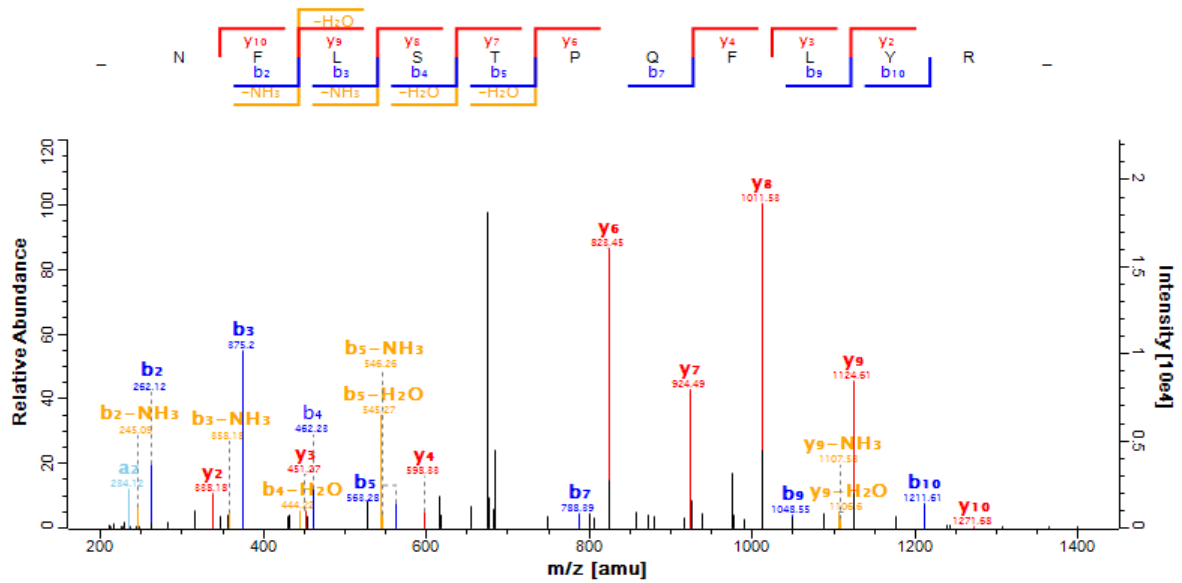

**Protein Group ID:** 349

**Protein Accession Numbers:** Q9BVC5; B4E2G9; C9J4K0

**Gene Names:** C2orf49

**Peptide Sequence:** SCTDSELLHPELLSQEFLLLTLEQK

**Total Number of Spectra:** 1

**Number of Replicates (out of 8):** 1

**Best Match Score:** 103.27

**Best Match Posterior Error Probability:** 4.80E-06

**Best Match Spectrum:**

|                    |           |                  |                                     |
|--------------------|-----------|------------------|-------------------------------------|
| <b>Scan number</b> | 89797     | <b>Raw file</b>  | A549-US-Mock-top20CID-Elite-2ug-B11 |
| <b>Method</b>      | ITMS; CID | <b>Genenames</b> | C2orf49                             |

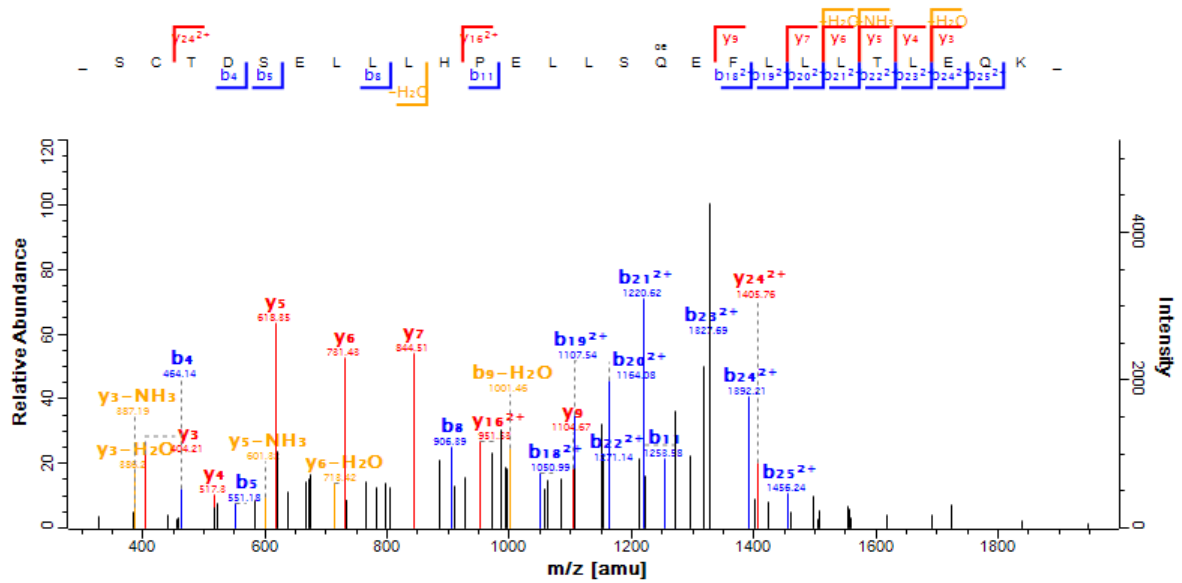

**Protein Group ID:** 351

**Protein Accession Numbers:** B4E2P2; Q9UNL2; C9JA28

**Gene Names:** SSR3

**Peptide Sequence:** QQSEEDLLLQDFSR

**Total Number of Spectra:** 9

**Number of Replicates (out of 8):** 7

**Best Match Score:** 137.62

**Best Match Posterior Error Probability:** 2.93E-05

**Best Match Spectrum:**

**Scan number** 60142      **Raw file** A549-US-Mock-top20CID-Elite-2ug-B13  
**Method** ITMS; CID      **Genenames** SSR3

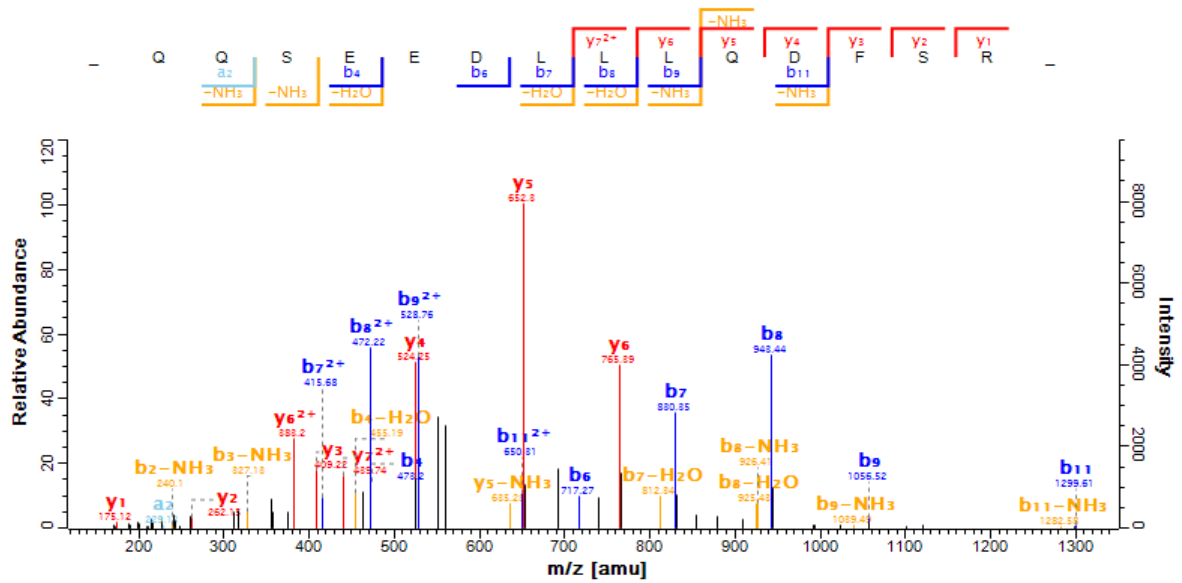



**Protein Group ID:** 356

**Protein Accession Numbers:** G5E9D4; Q96EB1-2; B4E3W0; Q96EB1

**Gene Names:** ELP4

**Peptide Sequence:** LNNLICDESDVK

**Total Number of Spectra:** 1

**Number of Replicates (out of 8):** 1

**Best Match Score:** 110.31

**Best Match Posterior Error Probability:** 0.00026024

**Best Match Spectrum:**

**Scan number** 30697      **Raw file** A549-US-Mock-top20CID-Elite-2ug-B14  
**Method** ITMS; CID      **Genenames** ELP4

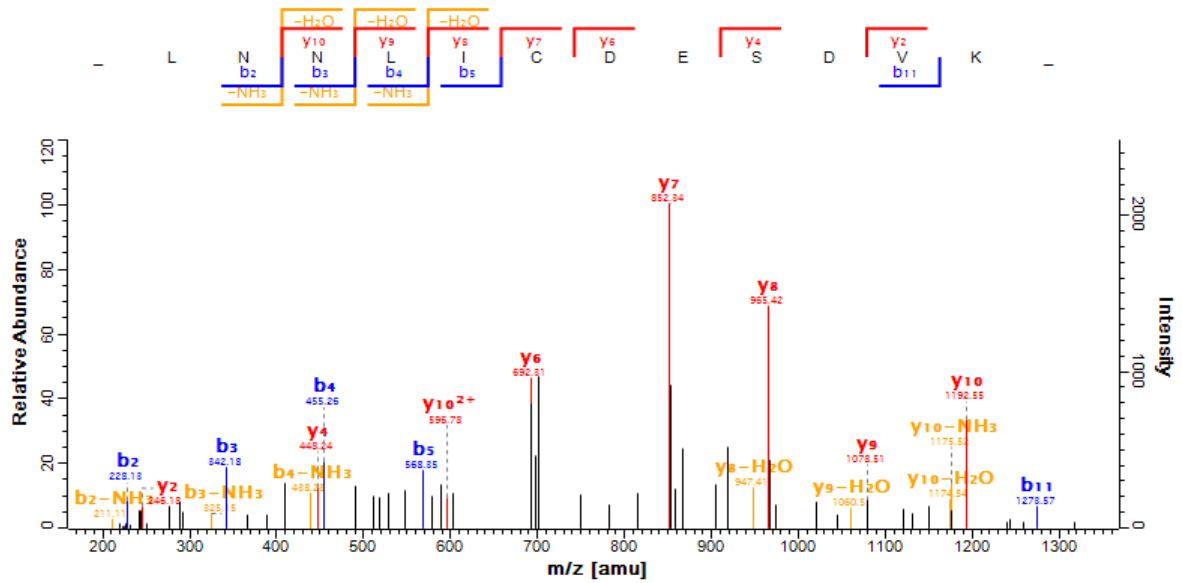

**Protein Group ID:** 357

**Protein Accession Numbers:** O94864; O94864-2; B4E3W3

**Gene Names:** SUPT7L

**Peptide Sequence:** LGQTPFPDVMEQVFHEVGI G S V L S L Q K

**Total Number of Spectra:** 2

**Number of Replicates (out of 8):** 2

**Best Match Score:** 51.39

**Best Match Posterior Error Probability:** 0.0036284

**Best Match Spectrum:**

**Scan number** 92179      **Raw file** A549-US-Mock-top20CID-Elite-2ug-B13  
**Method** ITMS; CID      **Genenames** SUPT7L

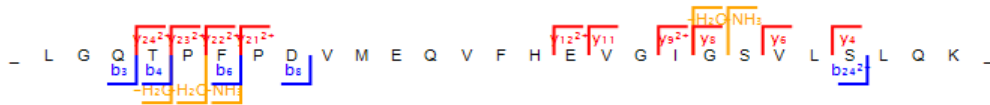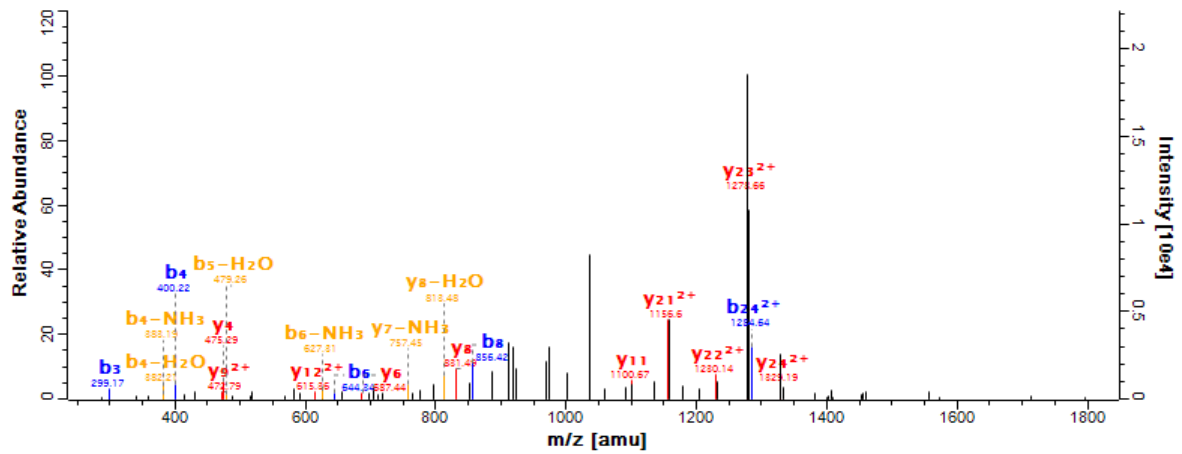

**Protein Group ID:** 358  
**Protein Accession Numbers:** B5MBX0; Q96FF9  
**Gene Names:** CDCA5  
**Peptide Sequence:** THSVPATPTSTPVPNPEAESSK  
**Total Number of Spectra:** 1  
**Number of Replicates (out of 8):** 1  
**Best Match Score:** 87.654  
**Best Match Posterior Error Probability:** 1.46E-05  
**Best Match Spectrum:**

**Scan number** 26126      **Raw file** A549-US-WT-top20CID-Elite-2ug-B12  
**Method** ITMS; CID      **Genenames** CDCA5

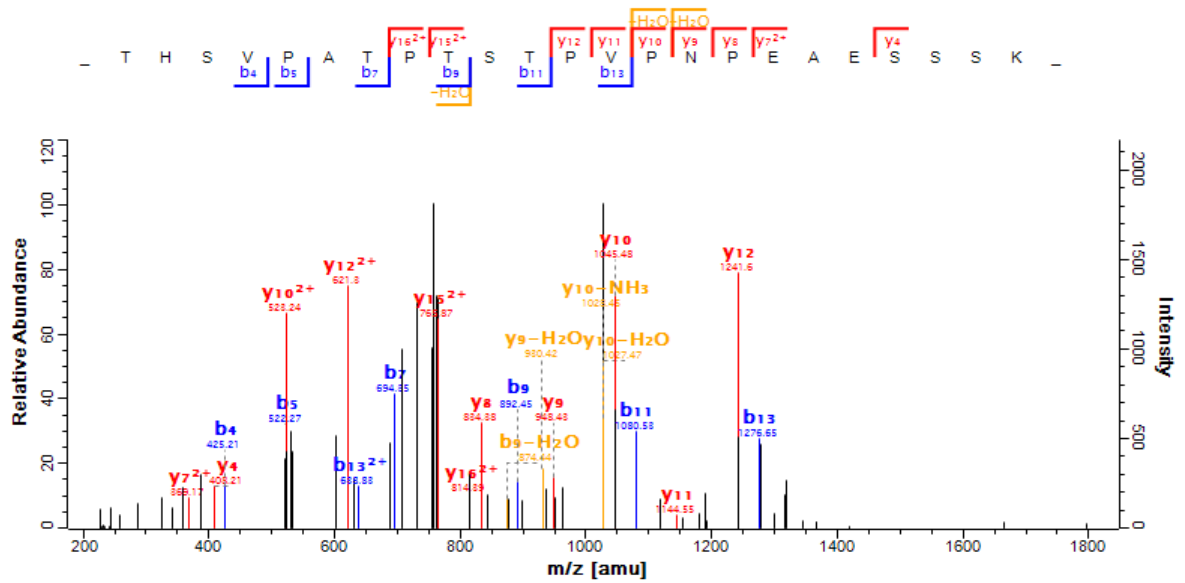

**Protein Group ID:** 360

**Protein Accession Numbers:** P05231; B5MCZ3; B5MC21

**Gene Names:** IL6

**Peptide Sequence:** LQAQNQLQDMTTHLIR

**Total Number of Spectra:** 3

**Number of Replicates (out of 8):** 2

**Best Match Score:** 70.41

**Best Match Posterior Error Probability:** 0.0034301

**Best Match Spectrum:**

**Scan number** 79106      **Raw file** A549-US-WT-top20CID-Elite-2ug-B14  
**Method** ITMS; CID      **Genenames** IL6

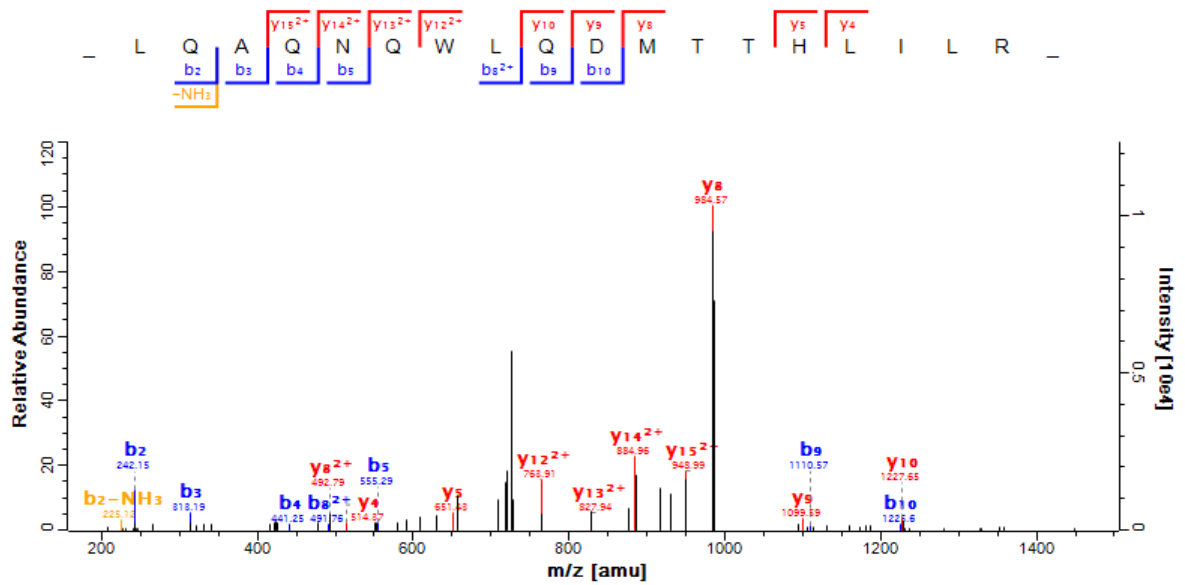

**Protein Group ID:** 361

**Protein Accession Numbers:** B5MC40; Q86YP4; Q86YP4-2; C9JJK9; C9JHD7; C9JGN4; C9JMI3; C9JVV3

**Gene Names:** GATAD2A

**Peptide Sequence:** GEGLVGDGPVDMR

**Total Number of Spectra:** 1

**Number of Replicates (out of 8):** 1

**Best Match Score:** 80.318

**Best Match Posterior Error Probability:** 0.0032393

**Best Match Spectrum:**

|                    |           |                  |                                   |
|--------------------|-----------|------------------|-----------------------------------|
| <b>Scan number</b> | 34393     | <b>Raw file</b>  | A549-US-WT-top20CID-Elite-2ug-B14 |
| <b>Method</b>      | ITMS: CID | <b>Genenames</b> | GATAD2A                           |

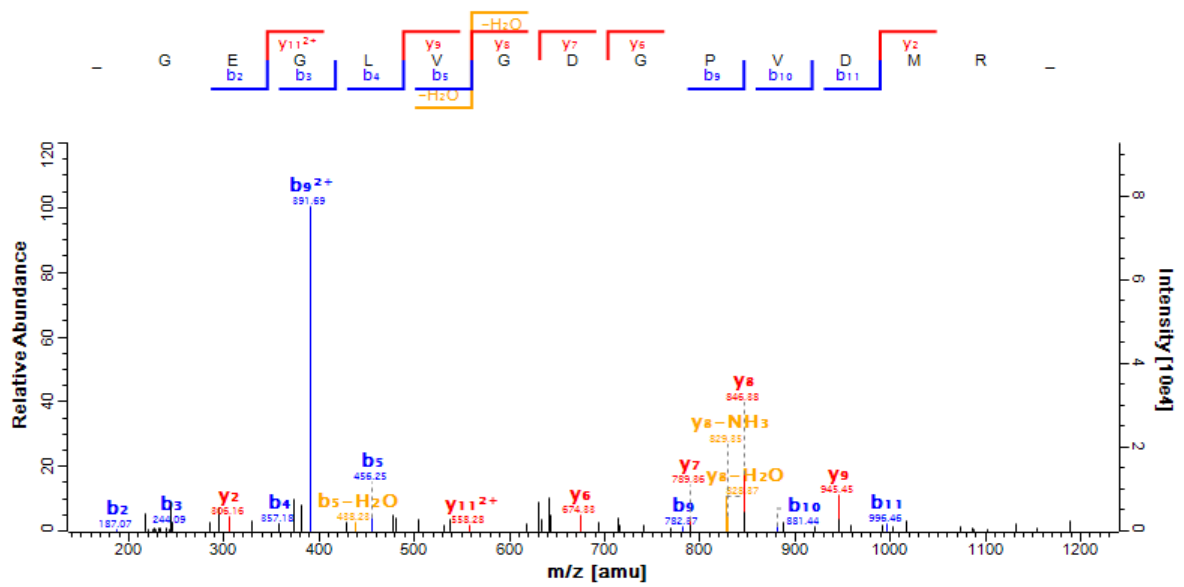

**Protein Group ID:** 367

**Protein Accession Numbers:** Q8N465; B5MCV2; H7BZ32; H7C0N1

**Gene Names:** D2HGDH

**Peptide Sequence:** LYDIVTDLR

**Total Number of Spectra:** 2

**Number of Replicates (out of 8):** 2

**Best Match Score:** 112.75

**Best Match Posterior Error Probability:** 0.00082265

**Best Match Spectrum:**

|                    |           |                  |                                     |
|--------------------|-----------|------------------|-------------------------------------|
| <b>Scan number</b> | 50328     | <b>Raw file</b>  | A549-US-Mock-top20CID-Elite-2ug-B14 |
| <b>Method</b>      | ITMS; CID | <b>Genenames</b> | D2HGDH                              |

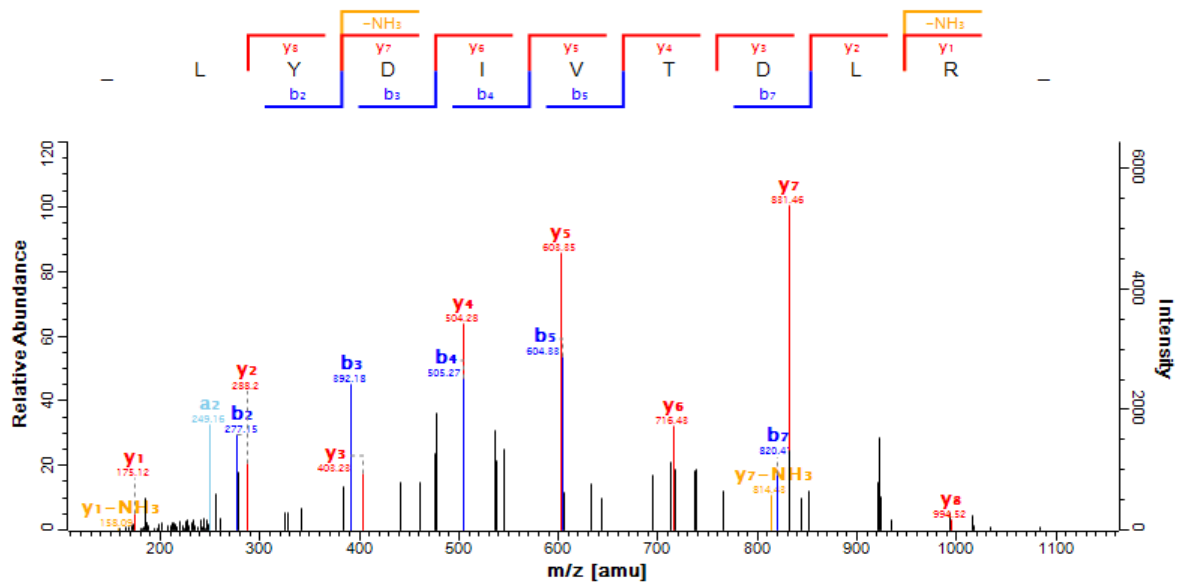

**Protein Group ID:** 377

**Protein Accession Numbers:** B7WPE2; Q32P44; G3V195; H7C355

**Gene Names:** EML3

**Peptide Sequence:** VLGAGGAGPAPATPSR

**Total Number of Spectra:** 6

**Number of Replicates (out of 8):** 5

**Best Match Score:** 144.68

**Best Match Posterior Error Probability:** 4.47E-06

**Best Match Spectrum:**

**Scan number** 18647      **Raw file** A549-US-WT-top20CID-Elite-2ug-B11  
**Method** ITMS; CID      **Genenames** EML3

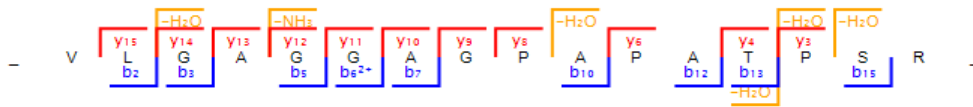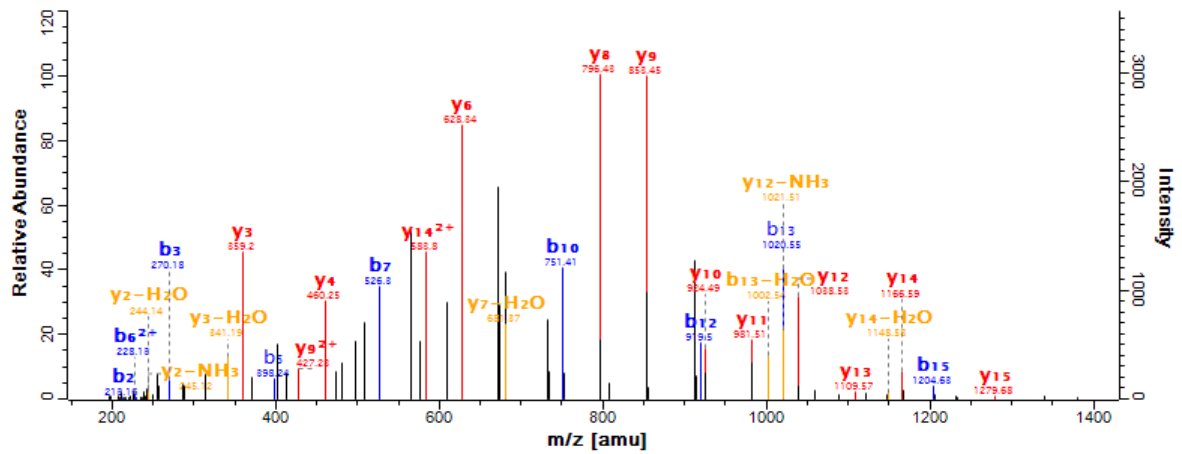

**Protein Group ID:** 380

**Protein Accession Numbers:** P78310; B7WPI3; P78310-2; D3YHP0; P78310-5

**Gene Names:** CXADR

**Peptide Sequence:** EGSLPLQYEWQK

**Total Number of Spectra:** 2

**Number of Replicates (out of 8):** 2

**Best Match Score:** 84.605

**Best Match Posterior Error Probability:** 0.0023153

**Best Match Spectrum:**

**Scan number** 48493      **Raw file** A549-US-WT-top20CID-Elite-2ug-B13  
**Method** ITMS; CID      **Genenames** CXADR

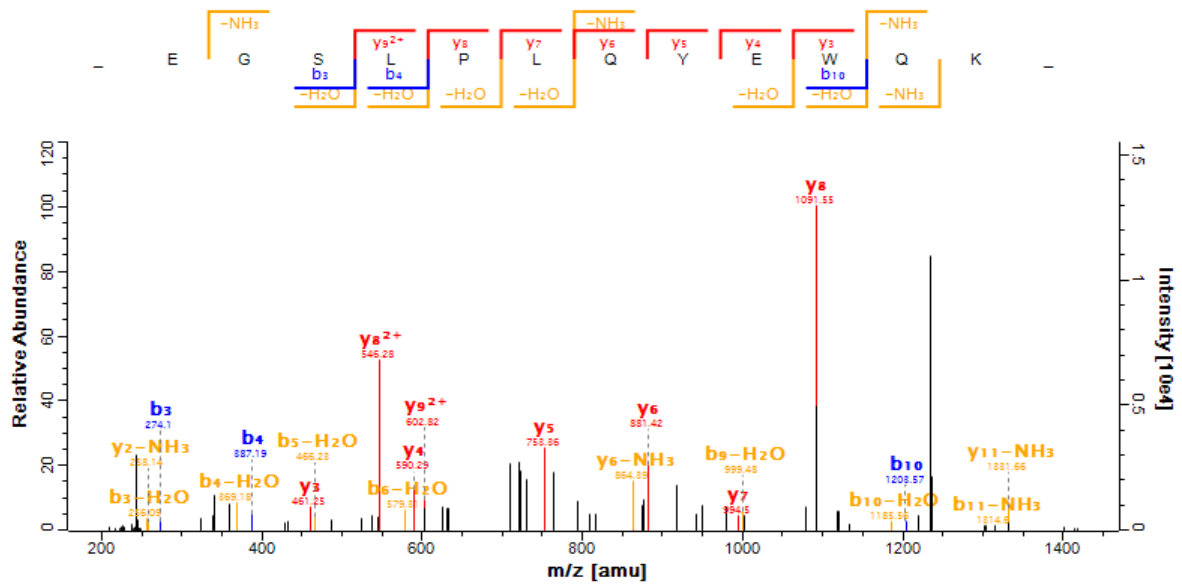



**Protein Group ID:** 381

**Protein Accession Numbers:** Q8NB37-2; Q8NB37; Q8NB37-3; B7Z1J9; H0YF25; H0YE25; H0YER3

**Gene Names:** PDDC1

**Peptide Sequence:** LPLVVEDFVK

**Total Number of Spectra:** 2

**Number of Replicates (out of 8):** 2

**Best Match Score:** 103.26

**Best Match Posterior Error Probability:** 0.00064102

**Best Match Spectrum:**

|                    |           |                  |                                     |
|--------------------|-----------|------------------|-------------------------------------|
| <b>Scan number</b> | 65345     | <b>Raw file</b>  | A549-US-Mock-top20CID-Elite-2ug-B12 |
| <b>Method</b>      | ITMS; CID | <b>Genenames</b> | PDDC1                               |

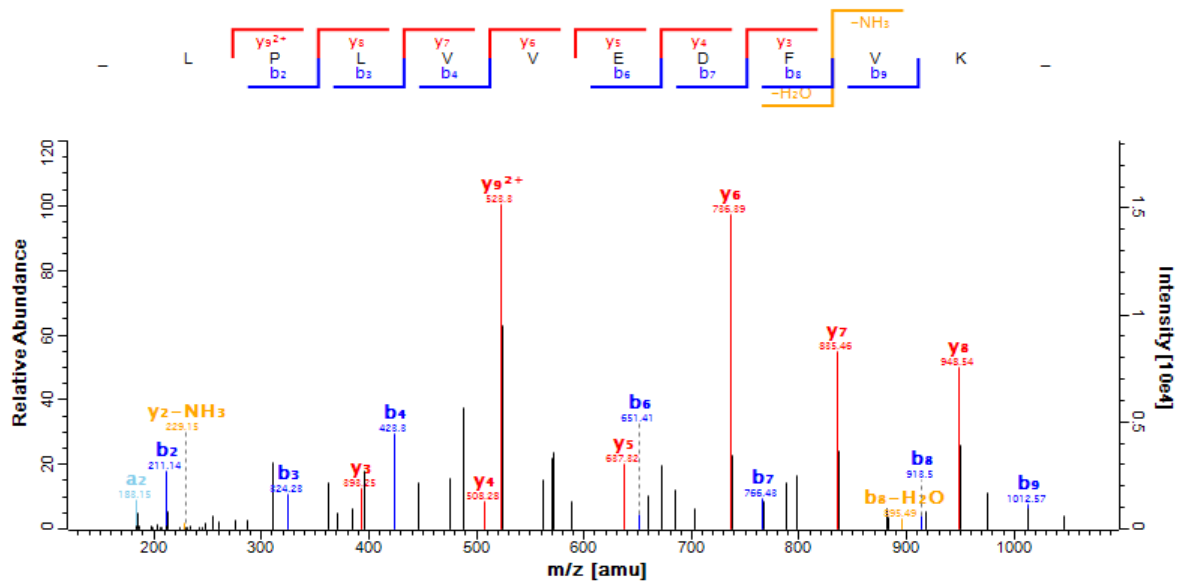

**Protein Group ID:** 382

**Protein Accession Numbers:** B7Z1P2; Q9H4M3; Q9H4M3-2

**Gene Names:** FBXO44

**Peptide Sequence:** AVGNINLELPENILLELFTHVPAAR

**Total Number of Spectra:** 1

**Number of Replicates (out of 8):** 1

**Best Match Score:** 64.2

**Best Match Posterior Error Probability:** 0.0011815

**Best Match Spectrum:**

**Scan number** 93143      **Raw file** A549-US-Mock-top20CID-Elite-2ug-B12  
**Method** ITMS; CID      **Genenames** FBXO44

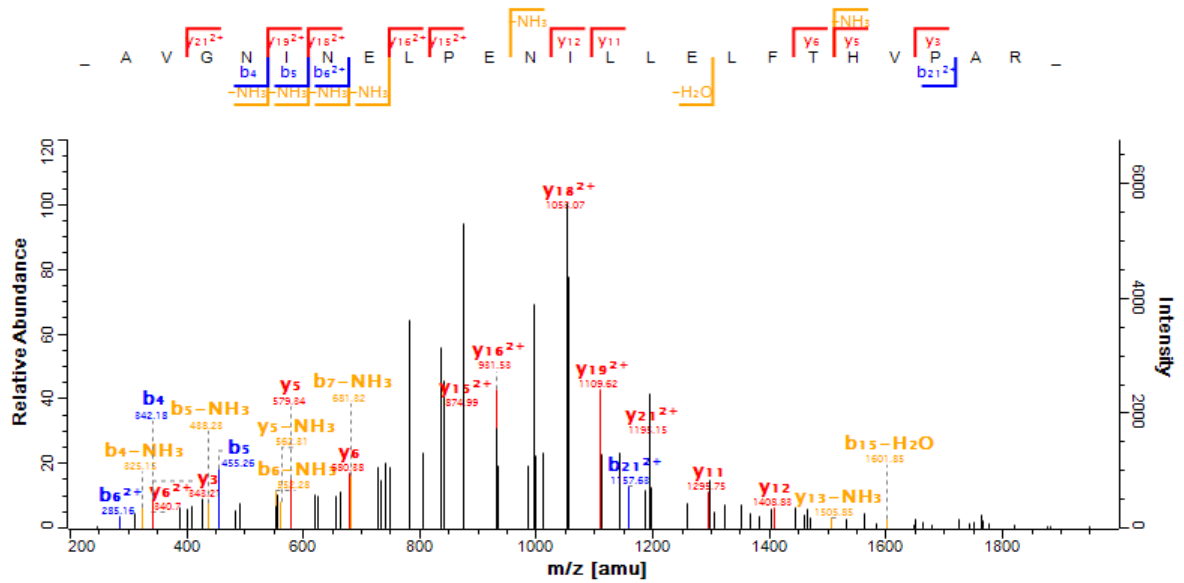

**Protein Group ID:** 383

**Protein Accession Numbers:** O00258; B7Z1T1; O00258-2; H7BYE5

**Gene Names:** WRB

**Peptide Sequence:** QELSTVNMMDEFAR

**Total Number of Spectra:** 2

**Number of Replicates (out of 8):** 2

**Best Match Score:** 80.706

**Best Match Posterior Error Probability:** 0.0030738

**Best Match Spectrum:**

**Scan number** 58673      **Raw file** A549-US-WT-top20CID-Elite-2ug-B14  
**Method** ITMS; CID      **Genenames** WRB

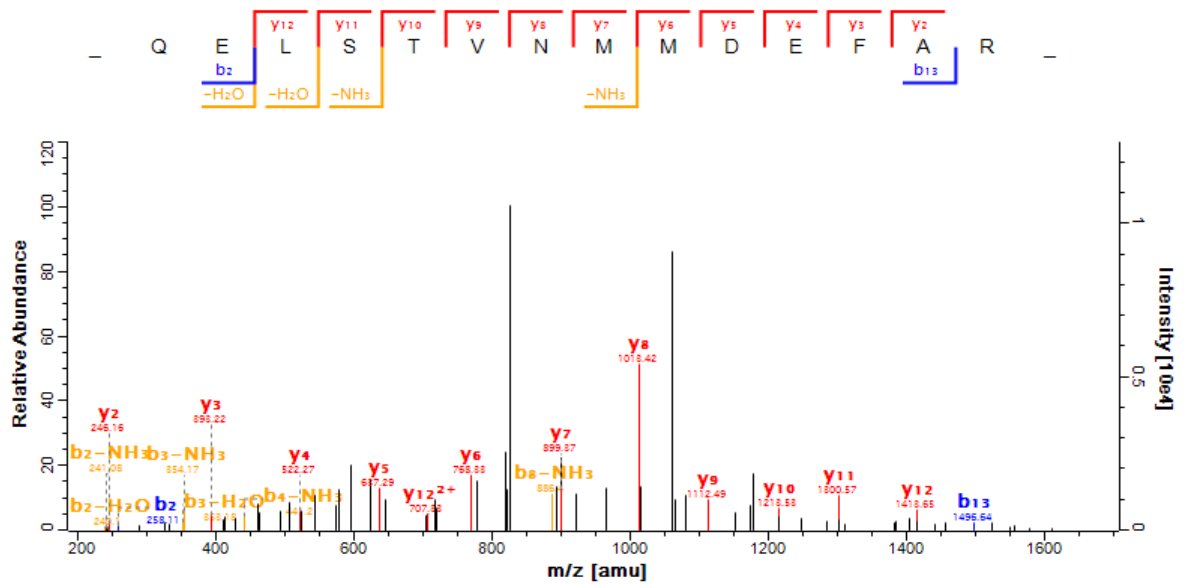

**Protein Group ID:** 384

**Protein Accession Numbers:** P06746; H0YBJ0; B7Z1W5; E5RHZ4

**Gene Names:** POLB

**Peptide Sequence:** GFTINEYTI RLPGLV TGVAGEPLVDSEK

**Total Number of Spectra:** 2

**Number of Replicates (out of 8):** 2

**Best Match Score:** 129.29

**Best Match Posterior Error Probability:** 7.06E-18

**Best Match Spectrum:**

**Scan number** 68518      **Raw file** A549-US-Mock-top20CID-Elite-2ug-B11  
**Method** ITMS; CID      **Genenames** POLB

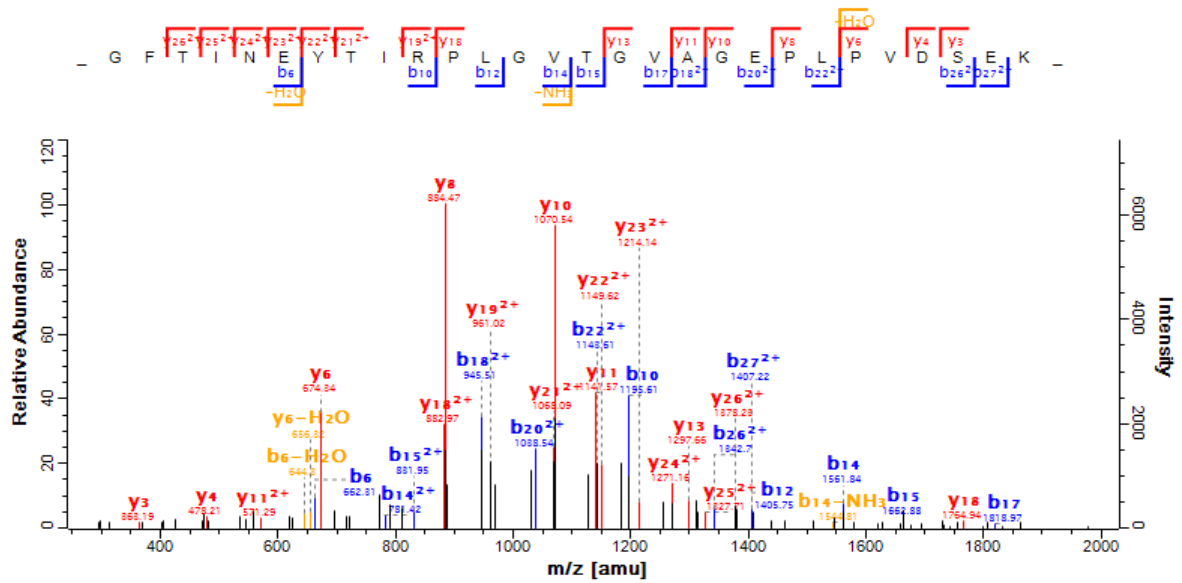

**Protein Group ID:** 387

**Protein Accession Numbers:** Q93050-3; F5H569; Q93050; Q93050-1; B7Z2A9; B7Z641; K7EN36; K7EM24; K7ELZ6

**Gene Names:** ATP6V0A1

**Peptide Sequence:** ANIPIMDTGENPEVPFPR

**Total Number of Spectra:** 7

**Number of Replicates (out of 8):** 6

**Best Match Score:** 171.98

**Best Match Posterior Error Probability:** 1.01E-14

**Best Match Spectrum:**

|                    |           |                  |                                   |
|--------------------|-----------|------------------|-----------------------------------|
| <b>Scan number</b> | 61511     | <b>Raw file</b>  | A549-US-WT-top20CID-Elite-2ug-B14 |
| <b>Method</b>      | ITMS: CID | <b>Genenames</b> | ATP6V0A1                          |

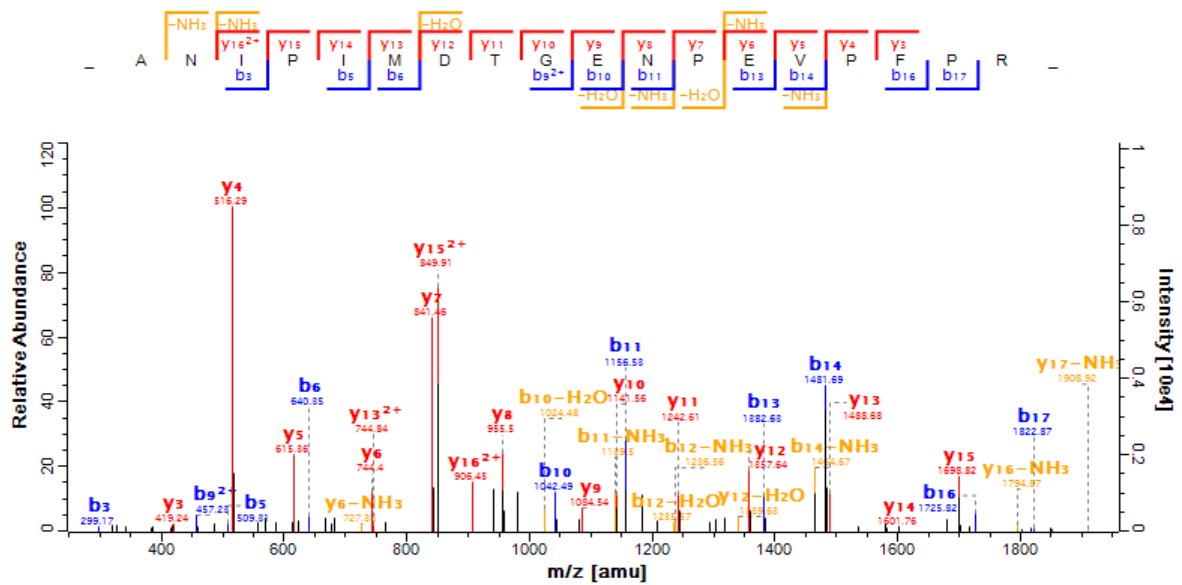

**Protein Group ID:** 390

**Protein Accession Numbers:** J3KQA6; O43739; Q99418; O43739-2; Q99418-2; B7Z2V9; G5E9B7; F8W8E2

**Gene Names:** CYTH3;CYTH2

**Peptide Sequence:** GINEGGDLPEELLR

**Total Number of Spectra:** 1

**Number of Replicates (out of 8):** 1

**Best Match Score:** 91.076

**Best Match Posterior Error Probability:** 0.0010949

**Best Match Spectrum:**

|                    |           |                  |                                   |
|--------------------|-----------|------------------|-----------------------------------|
| <b>Scan number</b> | 56248     | <b>Raw file</b>  | A549-US-WT-top20CID-Elite-2ug-B12 |
| <b>Method</b>      | ITMS: CID | <b>Genenames</b> | CYTH3;CYTH2                       |

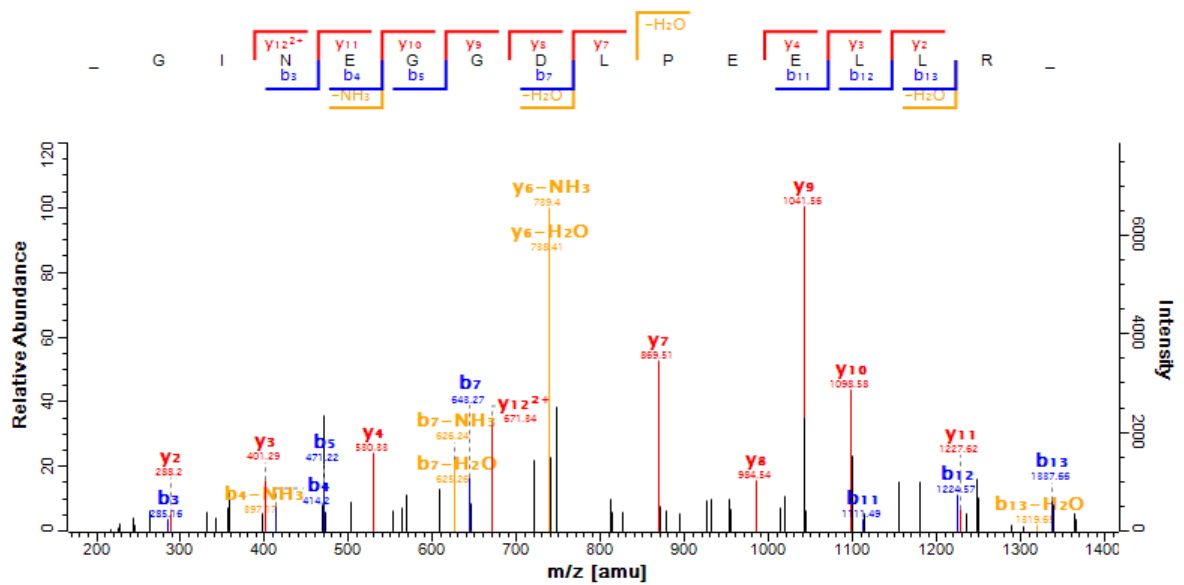

**Protein Group ID:** 392

**Protein Accession Numbers:** Q8NCE0; Q8NCE0-2; B7Z355; C9IZI7; C9J7Z4

**Gene Names:** TSEN2

**Peptide Sequence:** EAAPNEELVQR

**Total Number of Spectra:** 3

**Number of Replicates (out of 8):** 3

**Best Match Score:** 90.653

**Best Match Posterior Error Probability:** 0.0014098

**Best Match Spectrum:**

**Scan number** 17027      **Raw file** A549-US-Mock-top20CID-Elite-2ug-B14  
**Method** ITMS; CID      **Genenames** TSEN2

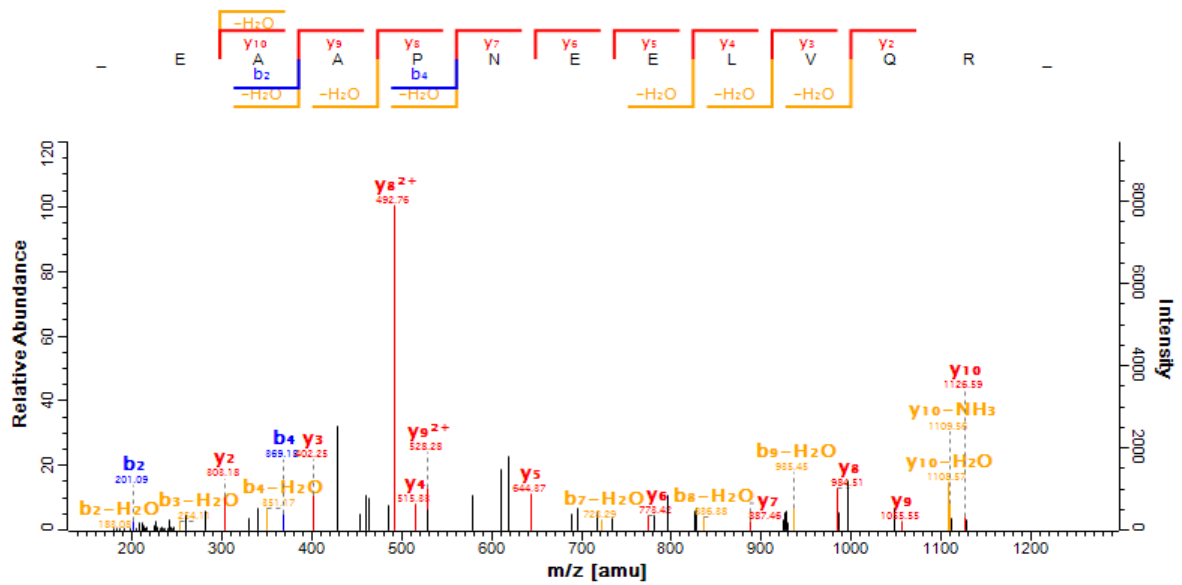

**Protein Group ID:** 393

**Protein Accession Numbers:** P13716-2; P13716; B7Z3I9

**Gene Names:** ALAD

**Peptide Sequence:** AGCQVVAPSDMMDGR

**Total Number of Spectra:** 1

**Number of Replicates (out of 8):** 1

**Best Match Score:** 82.925

**Best Match Posterior Error Probability:** 0.0019569

**Best Match Spectrum:**

**Scan number** 33658      **Raw file** A549-US-WT-top20CID-Elite-2ug-B11  
**Method** ITMS; CID      **Genenames** ALAD

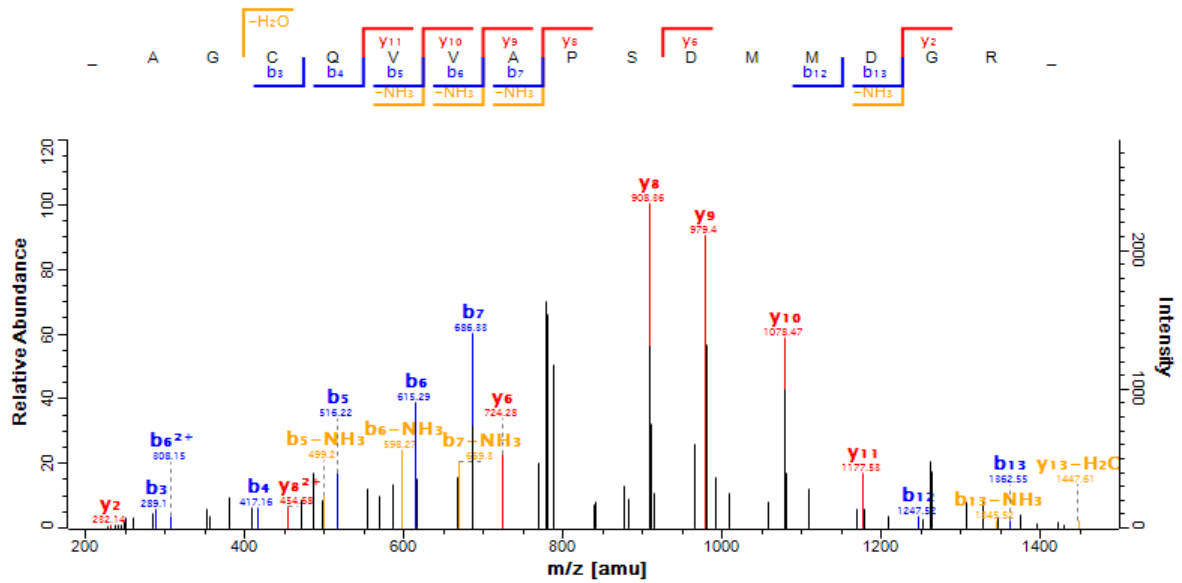



**Protein Group ID:** 396

**Protein Accession Numbers:** Q9NZ52; Q9NZ52-2; J3KRN0; J3KSS7; B7Z456; Q9NZ52-3; J3QS87; J3KTR5; J3KRM3

**Gene Names:** GGA3

**Peptide Sequence:** LQPPSGTELSPFSP I QPPAAITQVMLLANPLK

**Total Number of Spectra:** 1

**Number of Replicates (out of 8):** 1

**Best Match Score:** 55.153

**Best Match Posterior Error Probability:** 0.00054089

**Best Match Spectrum:**

|                    |           |                  |                                     |
|--------------------|-----------|------------------|-------------------------------------|
| <b>Scan number</b> | 93563     | <b>Raw file</b>  | A549-US-Mock-top20CID-Elite-2ug-B12 |
| <b>Method</b>      | ITMS: CID | <b>Genenames</b> | GGA3                                |

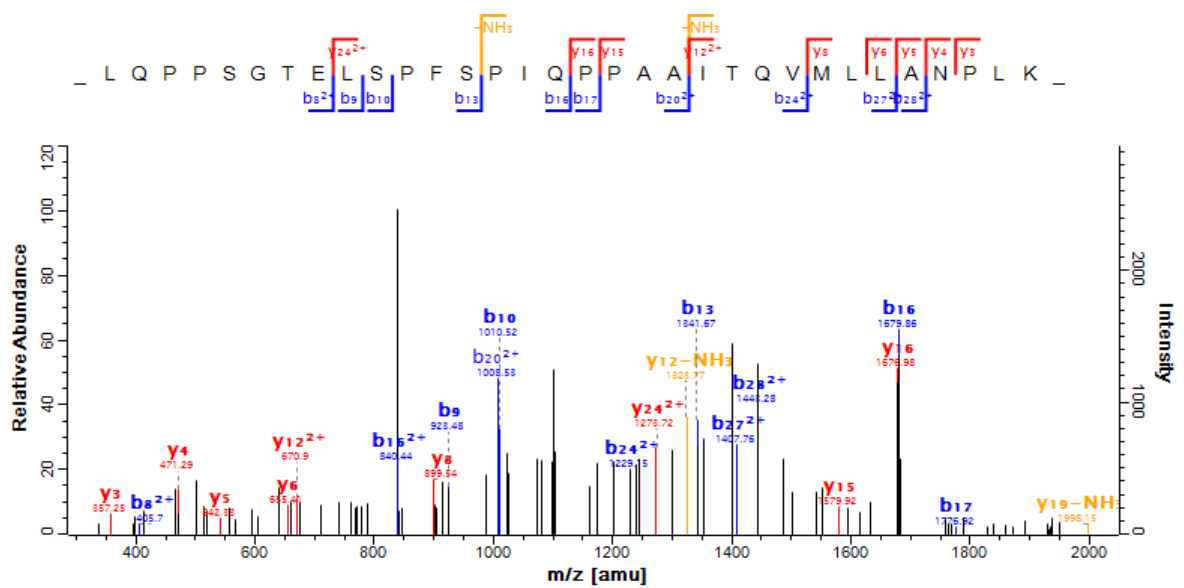

**Protein Group ID:** 400  
**Protein Accession Numbers:** O75554; B7Z4M2  
**Gene Names:** WBP4  
**Peptide Sequence:** TVTSLGVMADGVAPVFK  
**Total Number of Spectra:** 8  
**Number of Replicates (out of 8):** 8  
**Best Match Score:** 188.59  
**Best Match Posterior Error Probability:** 3.08E-21  
**Best Match Spectrum:**

**Scan number** 64833      **Raw file** A549-US-WT-top20CID-Elite-2ug-B14  
**Method** ITMS; CID      **Genenames** WBP4

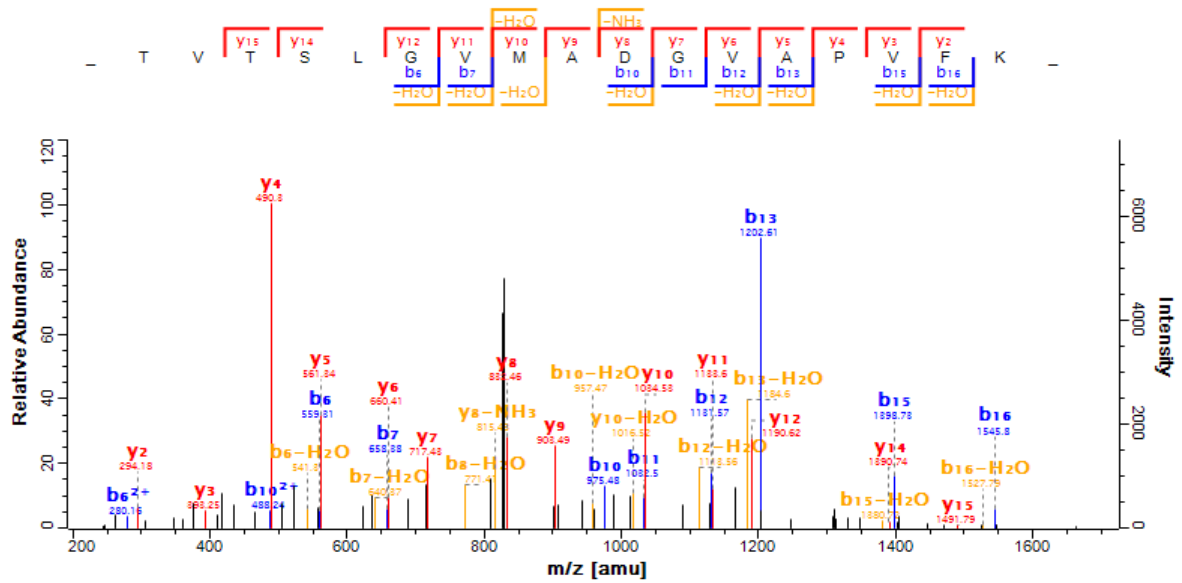

**Protein Group ID:** 403

**Protein Accession Numbers:** Q5VTE6; F5H476; Q5VTE6-2; B7Z5T0

**Gene Names:** ANGEL2

**Peptide Sequence:** LTQLAMLLAEISSVAHQK

**Total Number of Spectra:** 2

**Number of Replicates (out of 8):** 2

**Best Match Score:** 87.138

**Best Match Posterior Error Probability:** 0.0004486

**Best Match Spectrum:**

**Scan number** 91860      **Raw file** A549-US-WT-top20CID-Elite-2ug-B11  
**Method** ITMS; CID      **Genenames** ANGEL2

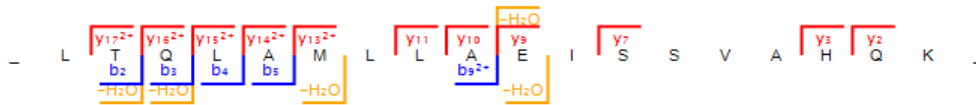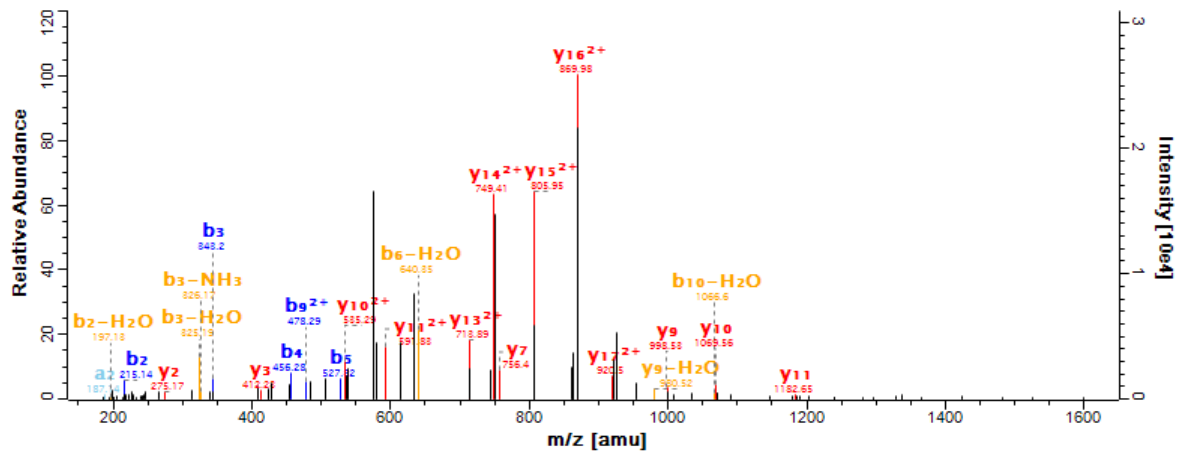

**Protein Group ID:** 410

**Protein Accession Numbers:** P51854; P51854-1; Q5TYJ8; B7Z7M4

**Gene Names:** TKTL1

**Peptide Sequence:** IGGLAESNINIIGSHCGVSVGDDGASQMALEDAIMFR

**Total Number of Spectra:** 1

**Number of Replicates (out of 8):** 1

**Best Match Score:** 55.442

**Best Match Posterior Error Probability:** 0.00034025

**Best Match Spectrum:**

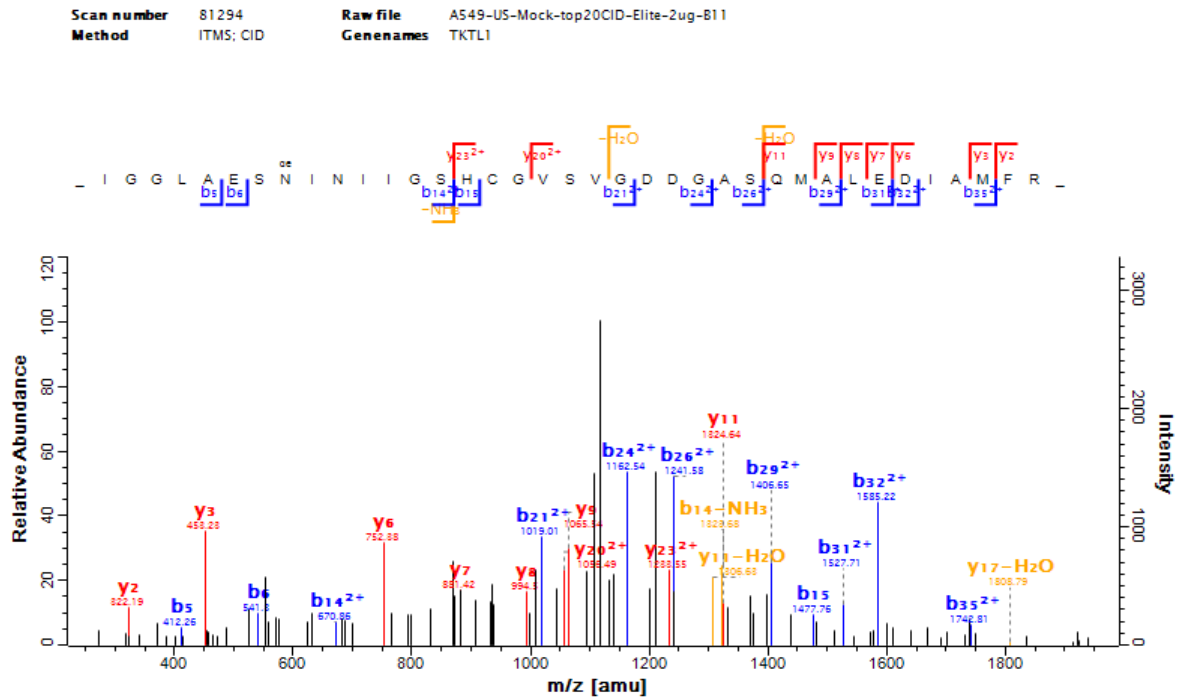

**Protein Group ID:** 411

**Protein Accession Numbers:** Q14139-2; Q14139; B7Z7P0

**Gene Names:** UBE4A

**Peptide Sequence:** DAQQSSSPAADNLR

**Total Number of Spectra:** 1

**Number of Replicates (out of 8):** 1

**Best Match Score:** 93.478

**Best Match Posterior Error Probability:** 0.00086622

**Best Match Spectrum:**

**Scan number** 9211      **Raw file** A549-US-Mock-top20CID-Elite-2ug-B12  
**Method** ITMS; CID      **Genenames** UBE4A

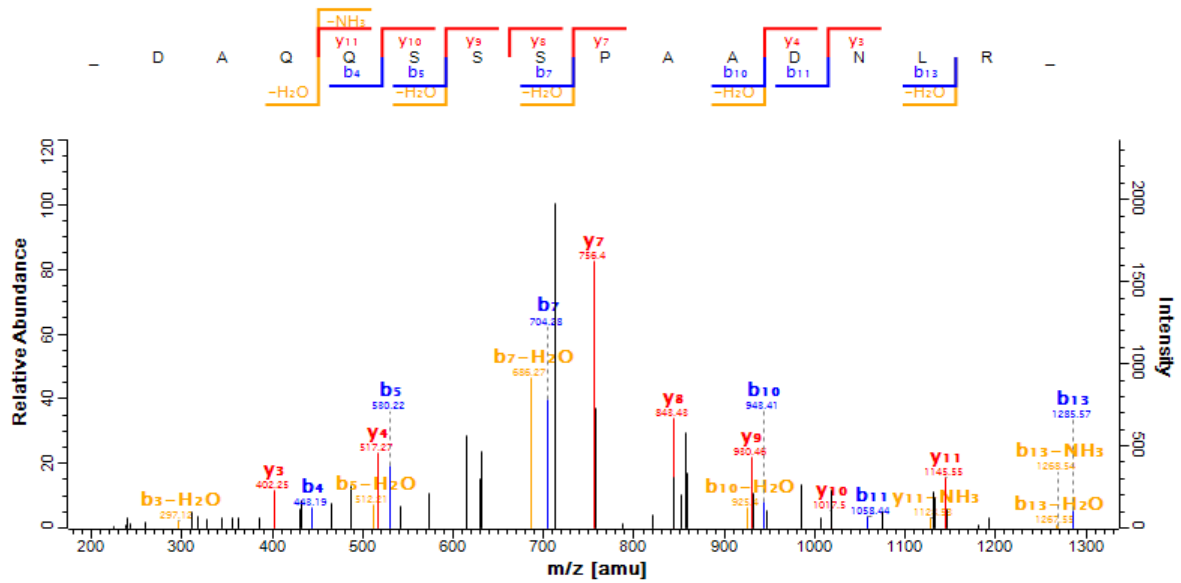

**Protein Group ID:** 414

**Protein Accession Numbers:** Q502W6-6; Q502W6; Q502W6-8; Q502W6-2; B7Z7Q7; H0YF54

**Gene Names:** VWA3B

**Peptide Sequence:** IIQFIQEQLK

**Total Number of Spectra:** 3

**Number of Replicates (out of 8):** 3

**Best Match Score:** 86.014

**Best Match Posterior Error Probability:** 0.0027897

**Best Match Spectrum:**

**Scan number** 63958      **Raw file** A549-US-WT-top20CID-Elite-2ug-B14  
**Method** ITMS; CID      **Genenames** VWA3B

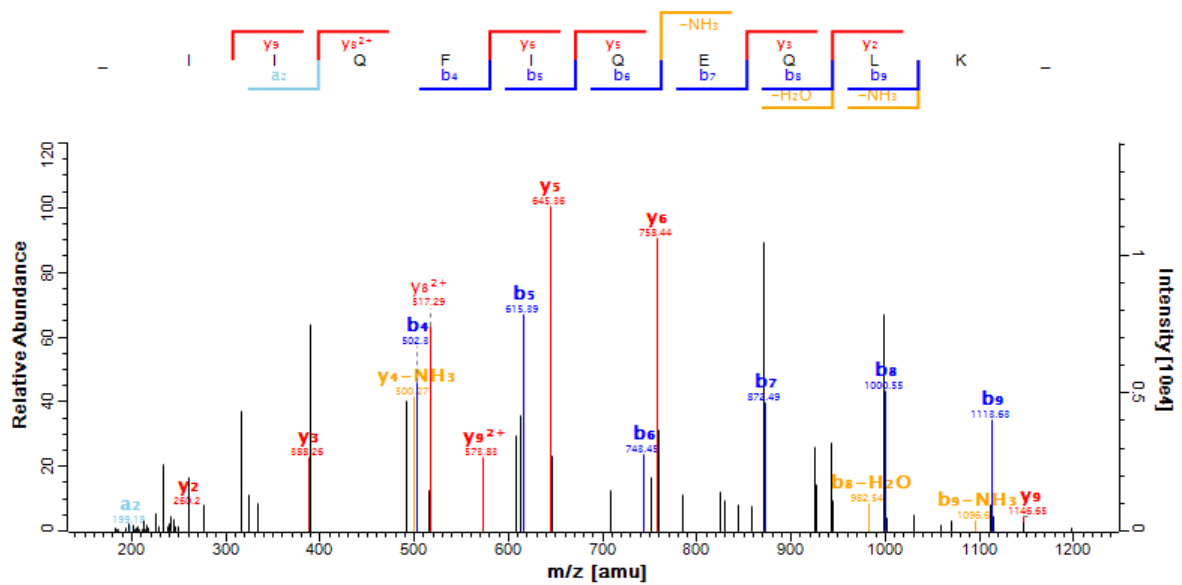

**Protein Group ID:** 420

**Protein Accession Numbers:** Q8NEY8; Q8NEY8-3; F8W0Q9; Q8NEY8-2; Q8NEY8-8; F8W6A0; E9PAX8; B7Z8L1; Q8NEY8-6; F8WF16; Q8NEY8-5; F8VWU8; F8VPY7

**Gene Names:** PPHLN1

**Peptide Sequence:** SFYSSHYAR

**Total Number of Spectra:** 3

**Number of Replicates (out of 8):** 3

**Best Match Score:** 113.62

**Best Match Posterior Error Probability:** 0.0007746

**Best Match Spectrum:**

|                    |           |                  |                                     |
|--------------------|-----------|------------------|-------------------------------------|
| <b>Scan number</b> | 13075     | <b>Raw file</b>  | A549-US-Mock-top20CID-Elite-2ug-B12 |
| <b>Method</b>      | ITMS; CID | <b>Genenames</b> | PPHLN1                              |

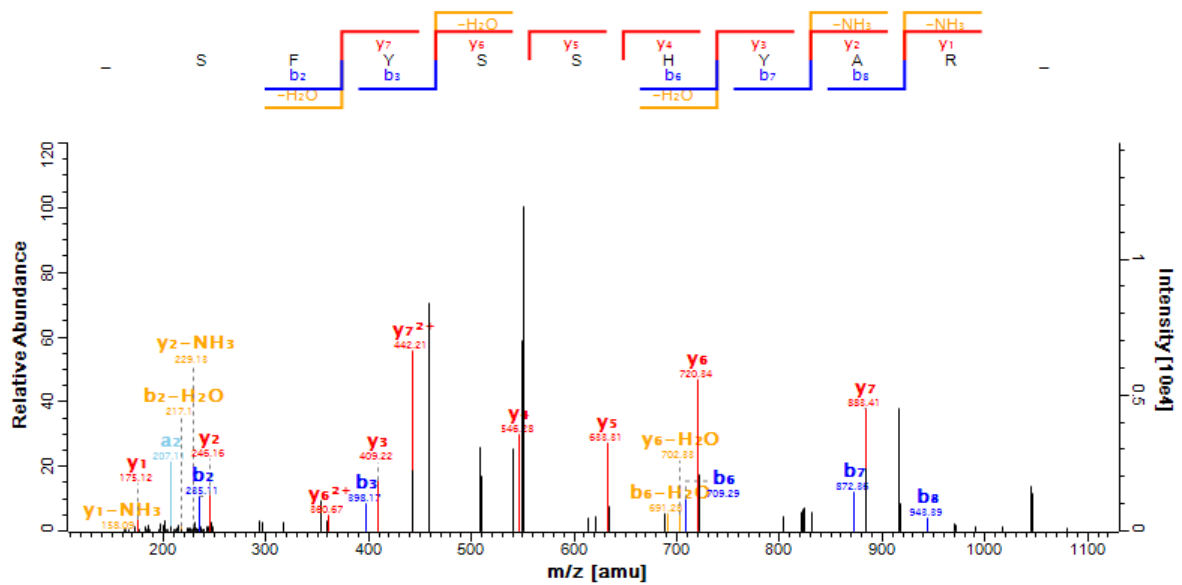

**Protein Group ID:** 421

**Protein Accession Numbers:** Q4G0N4; Q4G0N4-2; B7Z8V7; Q4G0N4-3

**Gene Names:** NADKD1

**Peptide Sequence:** VTNEYNESLLYSPEEPK

**Total Number of Spectra:** 2

**Number of Replicates (out of 8):** 2

**Best Match Score:** 178

**Best Match Posterior Error Probability:** 8.09E-15

**Best Match Spectrum:**

**Scan number** 42372      **Raw file** A549-US-Mock-top20CID-Elite-2ug-B13  
**Method** ITMS; CID      **Genenames** NADKD1

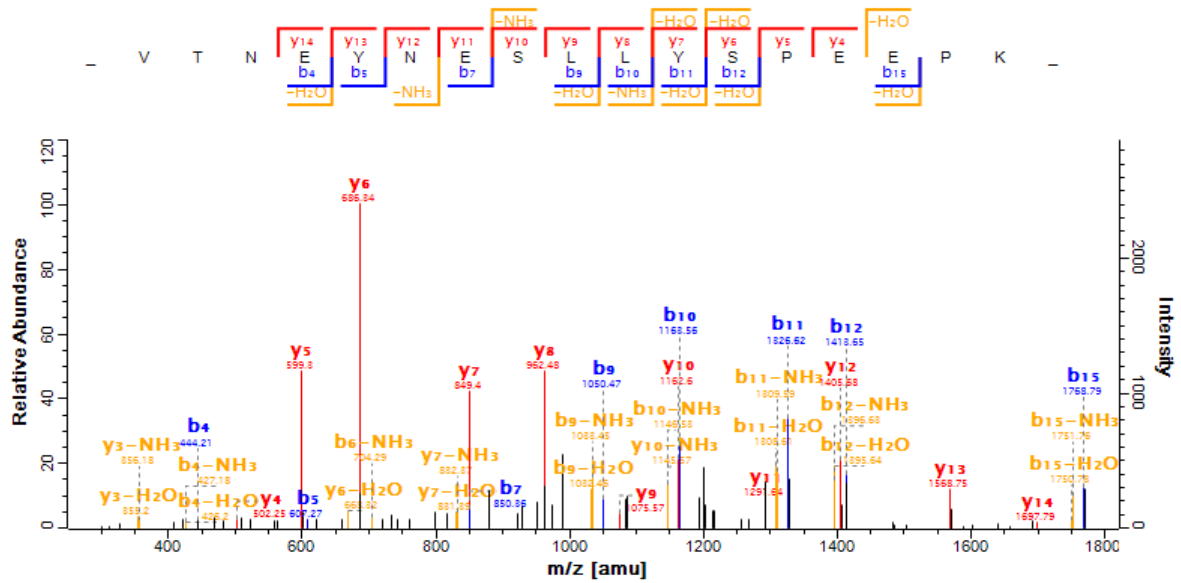



**Protein Group ID:** 427

**Protein Accession Numbers:** Q9UPQ7; F5H8I9; B7ZAG0; Q9UPQ7-3; E7ENB6; C9JWE6; H7C566

**Gene Names:** PDZRN3

**Peptide Sequence:** IIQINGIEVQNR

**Total Number of Spectra:** 1

**Number of Replicates (out of 8):** 1

**Best Match Score:** 87.184

**Best Match Posterior Error Probability:** 0.0086204

**Best Match Spectrum:**

|                    |           |                  |                                   |
|--------------------|-----------|------------------|-----------------------------------|
| <b>Scan number</b> | 92076     | <b>Raw file</b>  | A549-US-WT-top20CID-Elite-2ug-B14 |
| <b>Method</b>      | ITMS; CID | <b>Genenames</b> | PDZRN3                            |

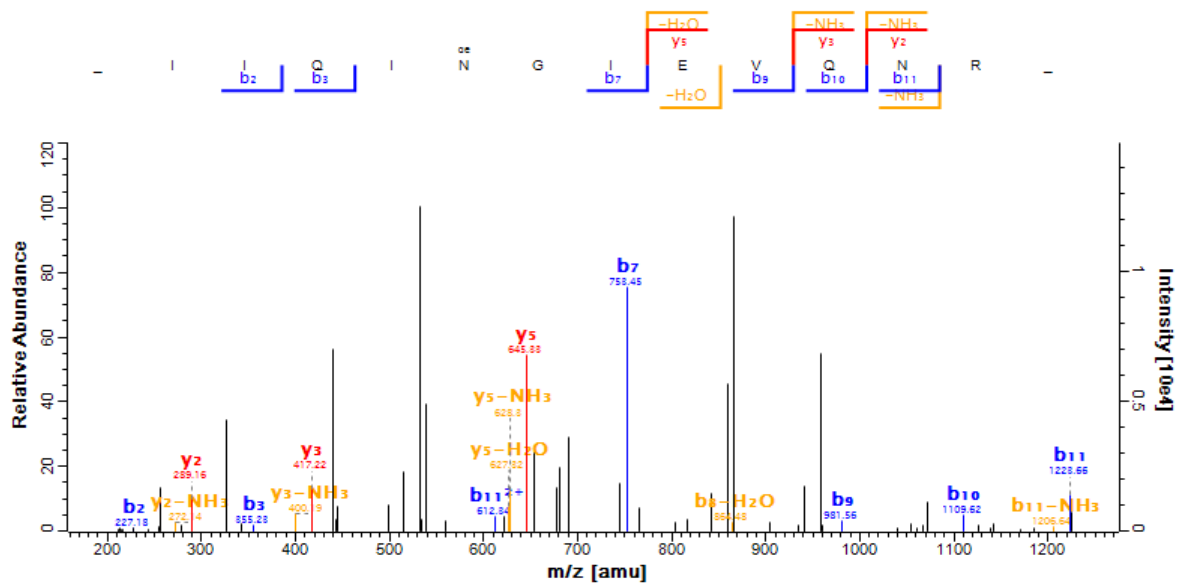

**Protein Group ID:** 428

**Protein Accession Numbers:** F5H8B1; Q99447; I3L1R7; B7ZAS0; Q99447-2; I3L2Q1; I3L1C4; I3L1F9

**Gene Names:** PCYT2

**Peptide Sequence:** WVDEVVPAAPYVTTLETLDK

**Total Number of Spectra:** 1

**Number of Replicates (out of 8):** 1

**Best Match Score:** 64.2

**Best Match Posterior Error Probability:** 0.0031511

**Best Match Spectrum:**

|                    |           |                  |                                   |
|--------------------|-----------|------------------|-----------------------------------|
| <b>Scan number</b> | 80388     | <b>Raw file</b>  | A549-US-WT-top20CID-Elite-2ug-B11 |
| <b>Method</b>      | ITMS; CID | <b>Genenames</b> | PCYT2                             |

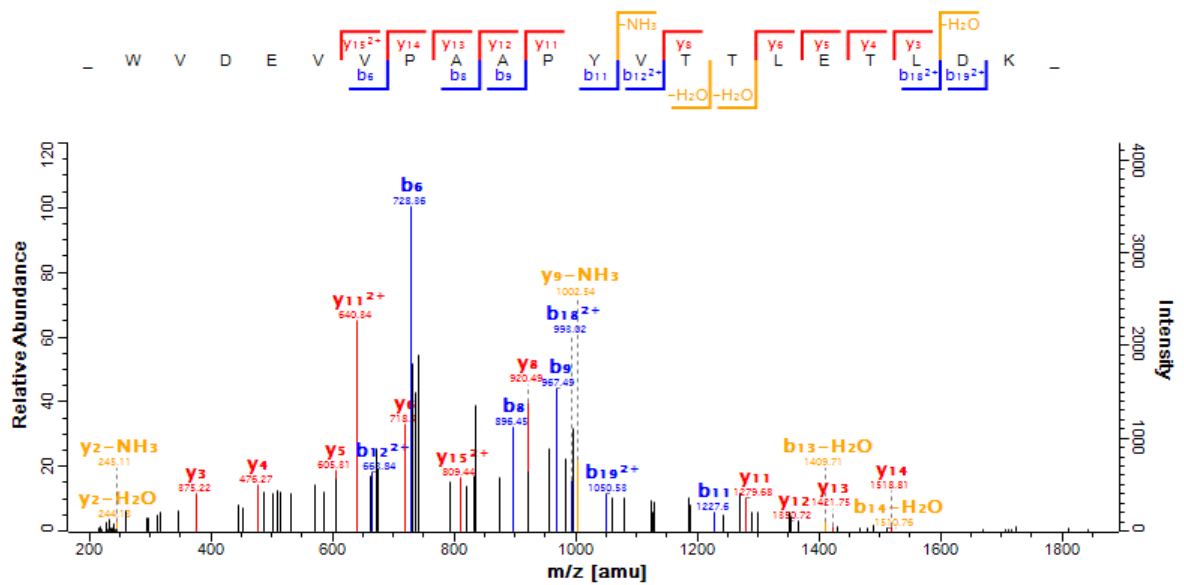

**Protein Group ID:** 430  
**Protein Accession Numbers:** O75449; B7ZBC8  
**Gene Names:** KATNA1  
**Peptide Sequence:** EAVVLPMWMPFFK  
**Total Number of Spectra:** 1  
**Number of Replicates (out of 8):** 1  
**Best Match Score:** 96.591  
**Best Match Posterior Error Probability:** 0.00056989  
**Best Match Spectrum:**

**Scan number** 91438      **Raw file** A549-US-WT-top20CID-Elite-2ug-B14  
**Method** ITMS; CID      **Genenames** KATNA1

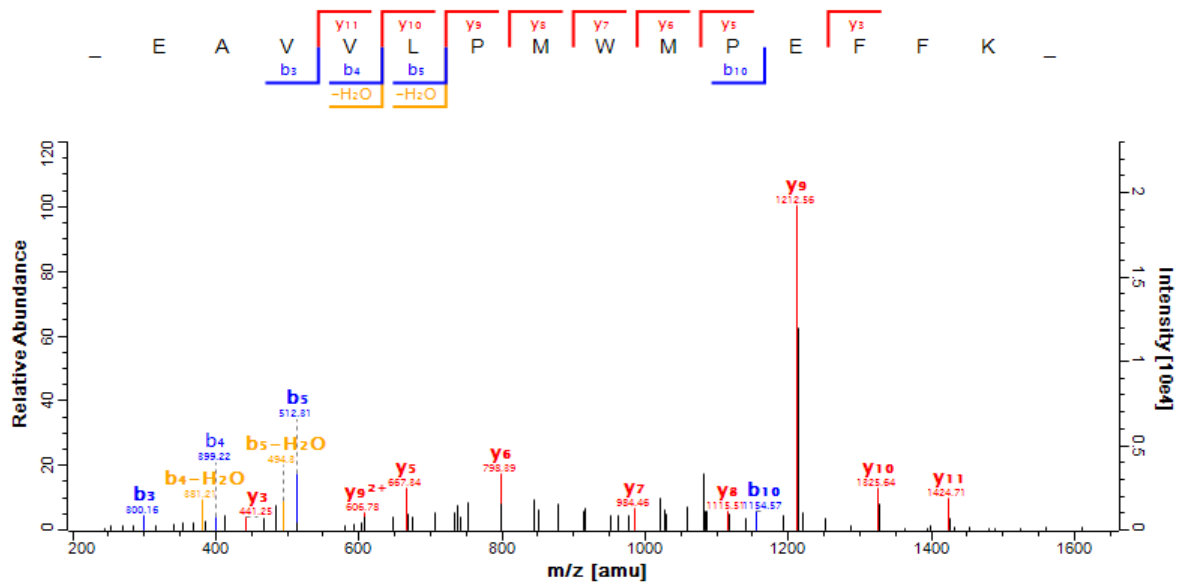

**Protein Group ID:** 441

**Protein Accession Numbers:** Q17RY0; Q17RY0-2; B7ZLQ8; E5RJM0; E5RFP2; Q17RY0-3

**Gene Names:** CPEB4

**Peptide Sequence:** FGPLIVDWPBK

**Total Number of Spectra:** 1

**Number of Replicates (out of 8):** 1

**Best Match Score:** 83.869

**Best Match Posterior Error Probability:** 0.0027702

**Best Match Spectrum:**

|                    |           |                  |                                   |
|--------------------|-----------|------------------|-----------------------------------|
| <b>Scan number</b> | 59237     | <b>Raw file</b>  | A549-US-WT-top20CID-Elite-2ug-B13 |
| <b>Method</b>      | ITMS; CID | <b>Genenames</b> | CPEB4                             |

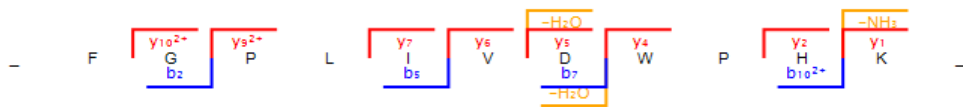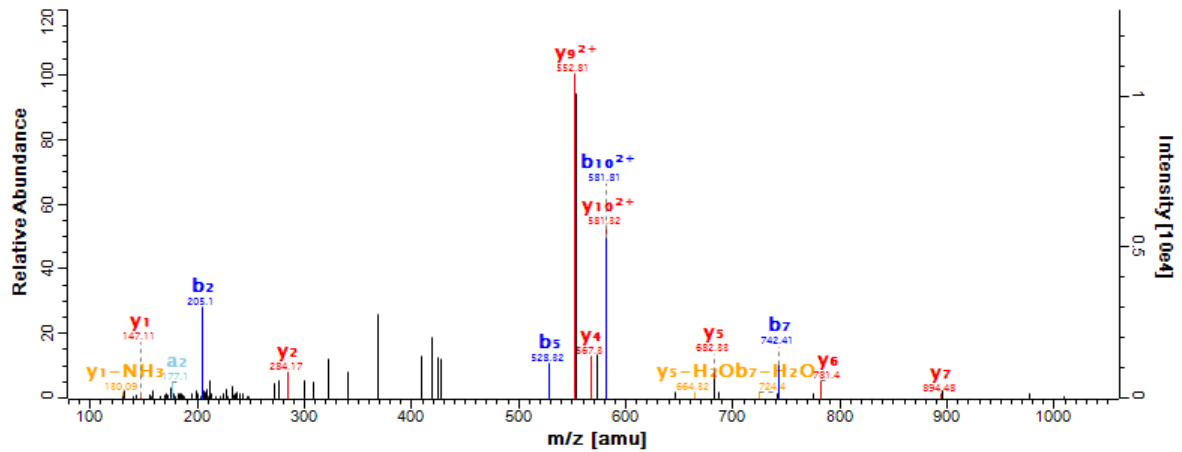

**Protein Group ID:** 442  
**Protein Accession Numbers:** Q99707; B7ZLW7  
**Gene Names:** MTR  
**Peptide Sequence:** AALFALQNLFE EK  
**Total Number of Spectra:** 2  
**Number of Replicates (out of 8):** 2  
**Best Match Score:** 156.08  
**Best Match Posterior Error Probability:** 1.53E-07  
**Best Match Spectrum:**

**Scan number** 80668      **Raw file** A549-US-Mock-top20CID-Elite-2ug-B11  
**Method** ITMS; CID      **Genenames** MTR

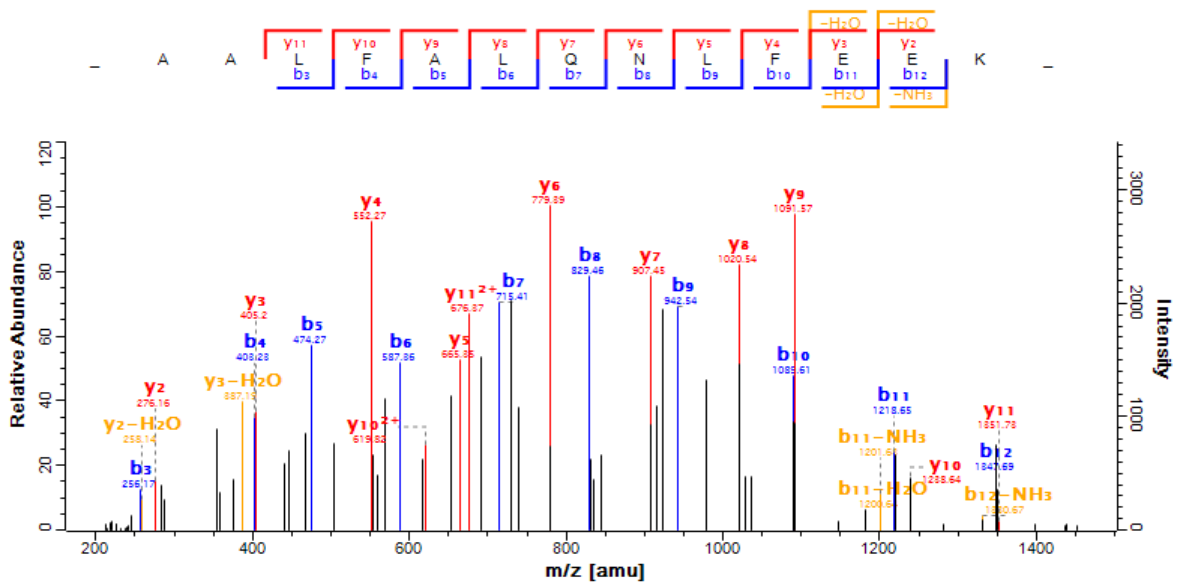

**Protein Group ID:** 445

**Protein Accession Numbers:** E9PGC5; B7ZMG0; Q5TG12; F5GXI4; Q15262-3; Q15262-2; Q15262; H0YDP9

**Gene Names:** PTPRK

**Peptide Sequence:** LWHLDPDTEYEIR

**Total Number of Spectra:** 1

**Number of Replicates (out of 8):** 1

**Best Match Score:** 92.19

**Best Match Posterior Error Probability:** 0.0011858

**Best Match Spectrum:**

|                    |           |                  |                                     |
|--------------------|-----------|------------------|-------------------------------------|
| <b>Scan number</b> | 51633     | <b>Raw file</b>  | A549-US-Mock-top20CID-Elite-2ug-B13 |
| <b>Method</b>      | ITMS; CID | <b>Genenames</b> | PTPRK                               |

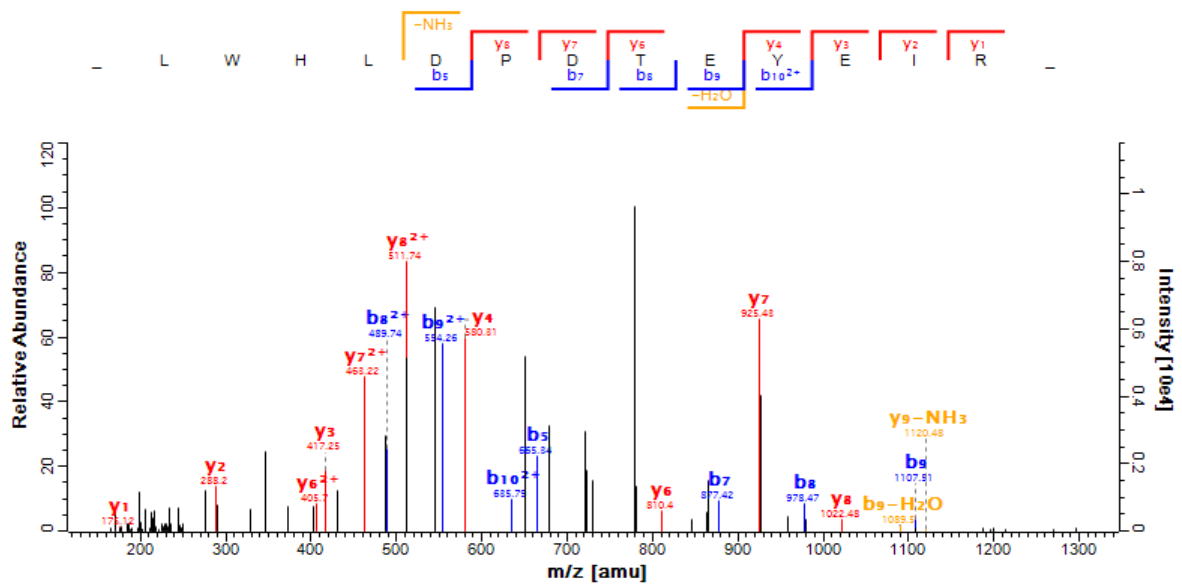

**Protein Group ID:** 453  
**Protein Accession Numbers:** Q9Y4Y9; B8ZZF8  
**Gene Names:** LSM5  
**Peptide Sequence:** AANATTNPSQLLPLELVDK  
**Total Number of Spectra:** 8  
**Number of Replicates (out of 8):** 6  
**Best Match Score:** 112.3  
**Best Match Posterior Error Probability:** 3.66E-05  
**Best Match Spectrum:**

**Scan number** 77200      **Raw file** A549-US-Mock-top20CID-Elite-2ug-B11  
**Method** ITMS; CID      **Genenames** LSM5

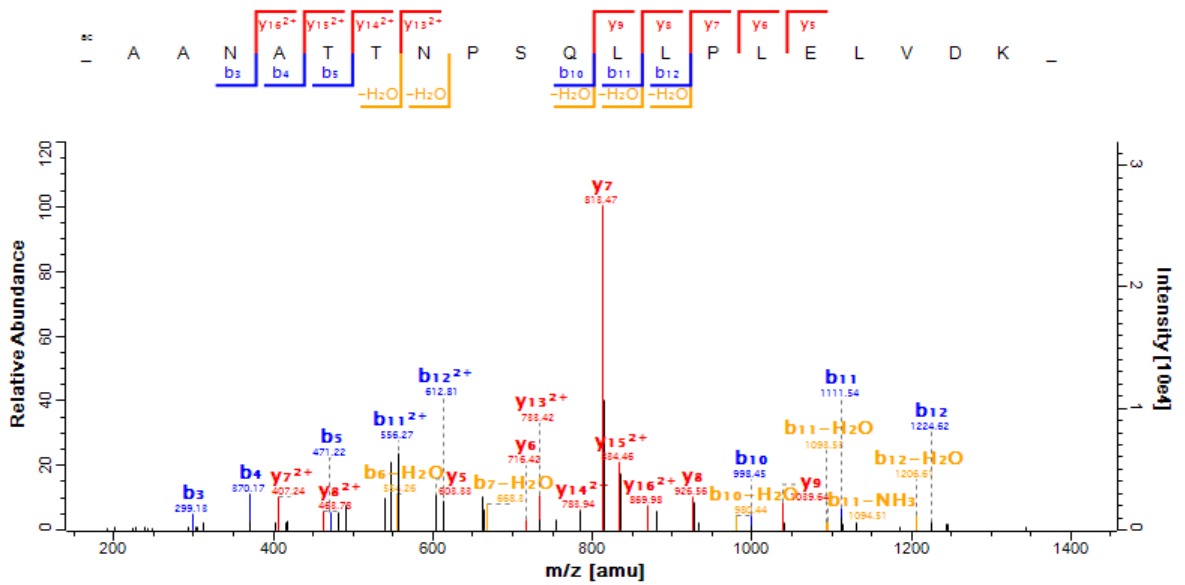

**Protein Group ID:** 458

**Protein Accession Numbers:** Q8TCC3-2; Q8TCC3; Q8TCC3-3; B8ZZV5

**Gene Names:** MRPL30

**Peptide Sequence:** VFQASPEDHEK

**Total Number of Spectra:** 11

**Number of Replicates (out of 8):** 7

**Best Match Score:** 116.55

**Best Match Posterior Error Probability:** 9.10E-05

**Best Match Spectrum:**

**Scan number** 7138      **Raw file** A549-US-Mock-top20CID-Elite-2ug-B14  
**Method** ITMS; CID      **Genenames** MRPL30

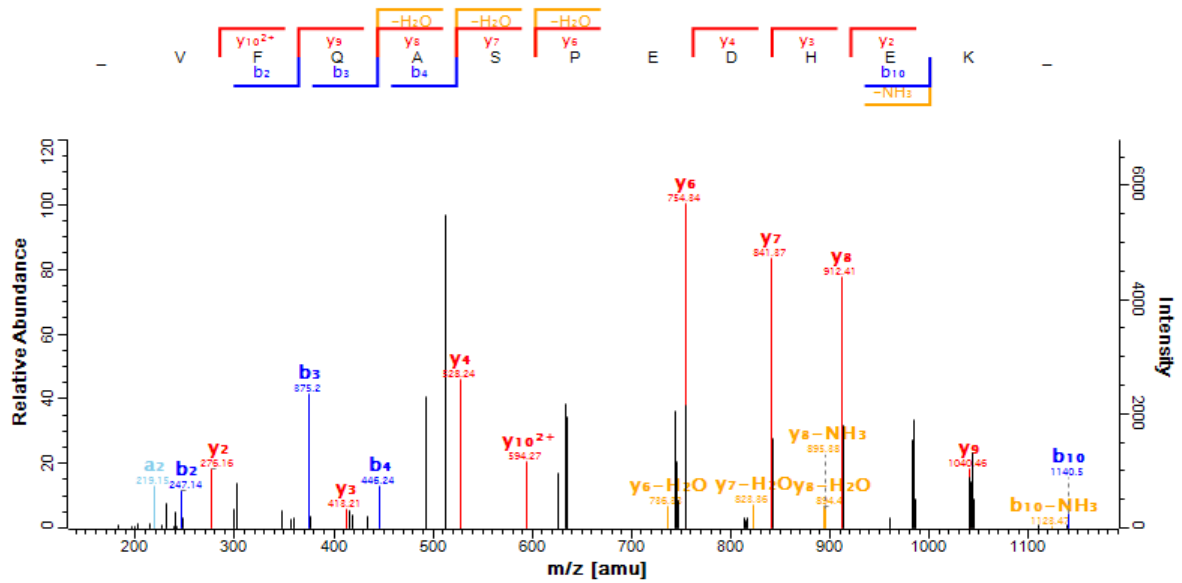



**Protein Group ID:** 465  
**Protein Accession Numbers:** C1IDX9; O94817  
**Gene Names:** ATG12  
**Peptide Sequence:** TIQGLIDFIK  
**Total Number of Spectra:** 2  
**Number of Replicates (out of 8):** 2  
**Best Match Score:** 115.78  
**Best Match Posterior Error Probability:** 0.00021181  
**Best Match Spectrum:**

**Scan number** 69458      **Raw file** A549-US-Mock-top20CID-Elite-2ug-B11  
**Method** ITMS; CID      **Genenames** ATG12

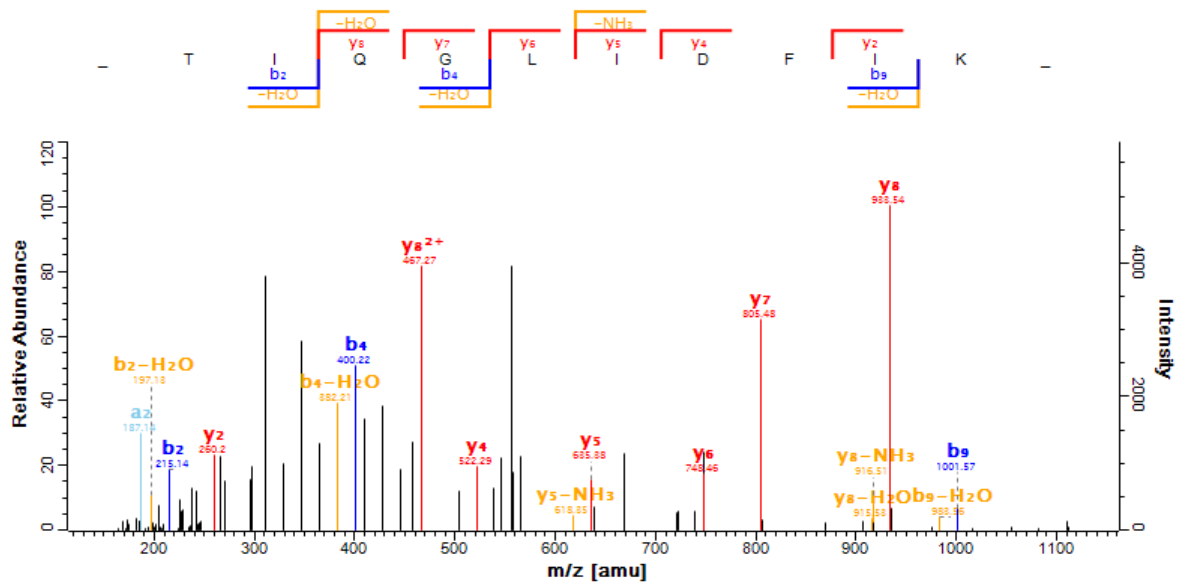

**Protein Group ID:** 474  
**Protein Accession Numbers:** P54278; I3L0B5; C9J167  
**Gene Names:** PMS2  
**Peptide Sequence:** QLHHEAQQSEGEQNYR  
**Total Number of Spectra:** 8  
**Number of Replicates (out of 8):** 6  
**Best Match Score:** 104.55  
**Best Match Posterior Error Probability:** 0.00013992  
**Best Match Spectrum:**

**Scan number** 3254      **Raw file** A549-US-Mock-top20CID-Elite-2ug-B12  
**Method** ITMS; CID      **Genenames** PMS2

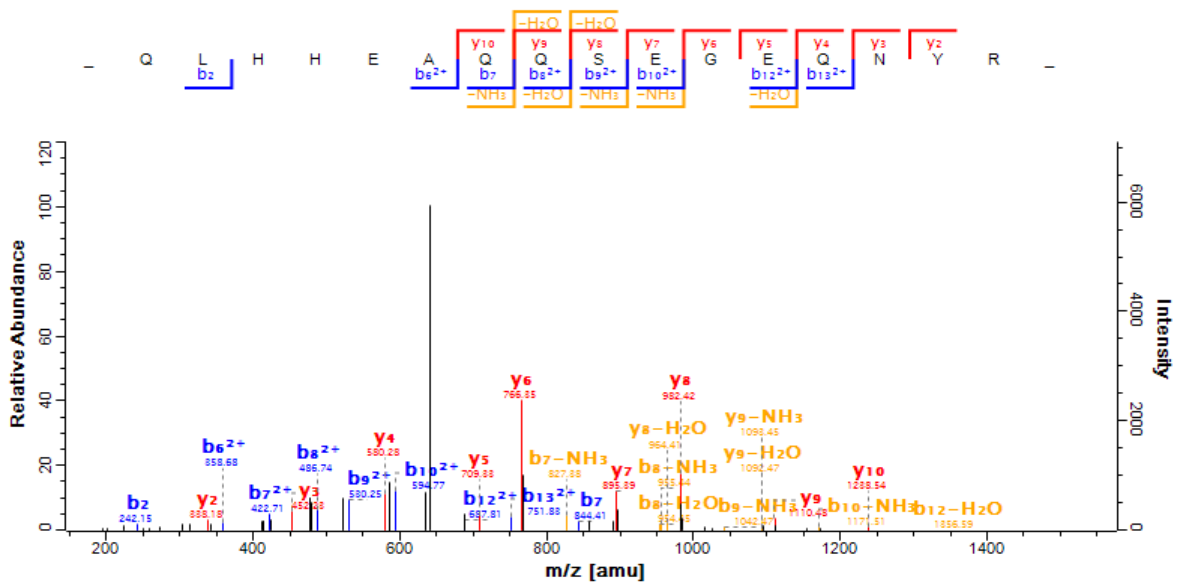

**Protein Group ID:** 477

**Protein Accession Numbers:** P52747; E7ER34; E7EN86; P52747-2; C9JTC5; E9PJF2; E9PMY8; E9PS81; E9PLN4; C9JRS3; E9PPB0; E9PLS7; C9JCG1; C9J2G7

**Gene Names:** ZNF143

**Peptide Sequence:** MLLAQINR

**Total Number of Spectra:** 1

**Number of Replicates (out of 8):** 1

**Best Match Score:** 145.04

**Best Match Posterior Error Probability:** 0.0014018

**Best Match Spectrum:**

|                    |           |                  |                                     |
|--------------------|-----------|------------------|-------------------------------------|
| <b>Scan number</b> | 61594     | <b>Raw file</b>  | A549-US-Mock-top20CID-Elite-2ug-B12 |
| <b>Method</b>      | ITMS; CID | <b>Genenames</b> | ZNF143                              |

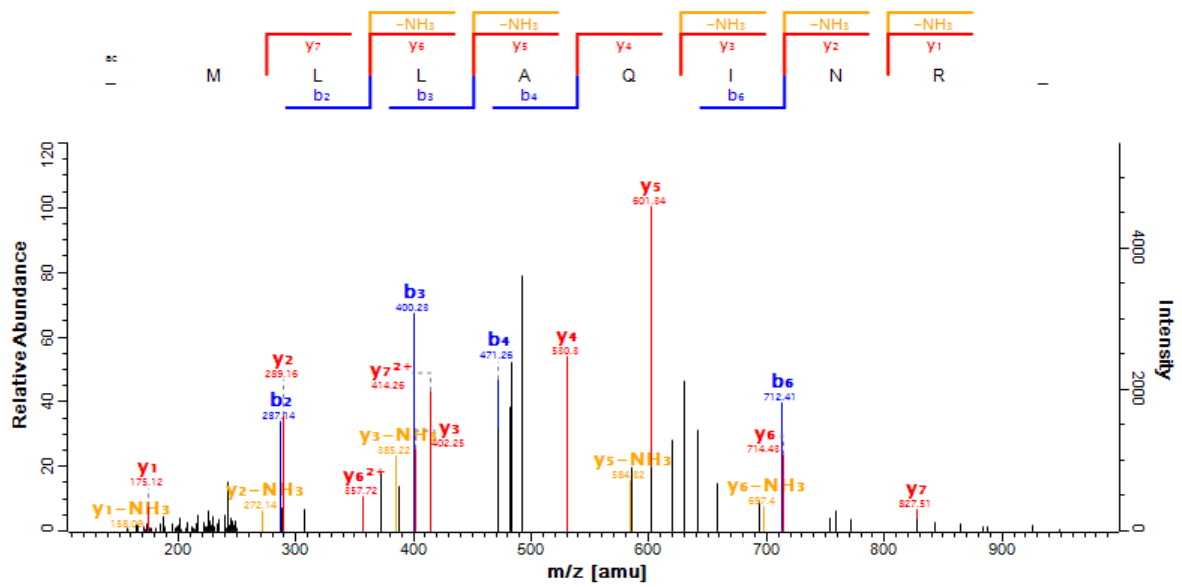

**Protein Group ID:** 479

**Protein Accession Numbers:** P51965; C9J8K2; H7C061; C9J2P0

**Gene Names:** UBE2E1

**Peptide Sequence:** ELADITLDPPPNC SAGPK

**Total Number of Spectra:** 7

**Number of Replicates (out of 8):** 7

**Best Match Score:** 125.52

**Best Match Posterior Error Probability:** 4.86E-05

**Best Match Spectrum:**

**Scan number** 43966      **Raw file** A549-US-WT-top20CID-Elite-2ug-B13  
**Method** ITMS; CID      **Genenames** UBE2E1

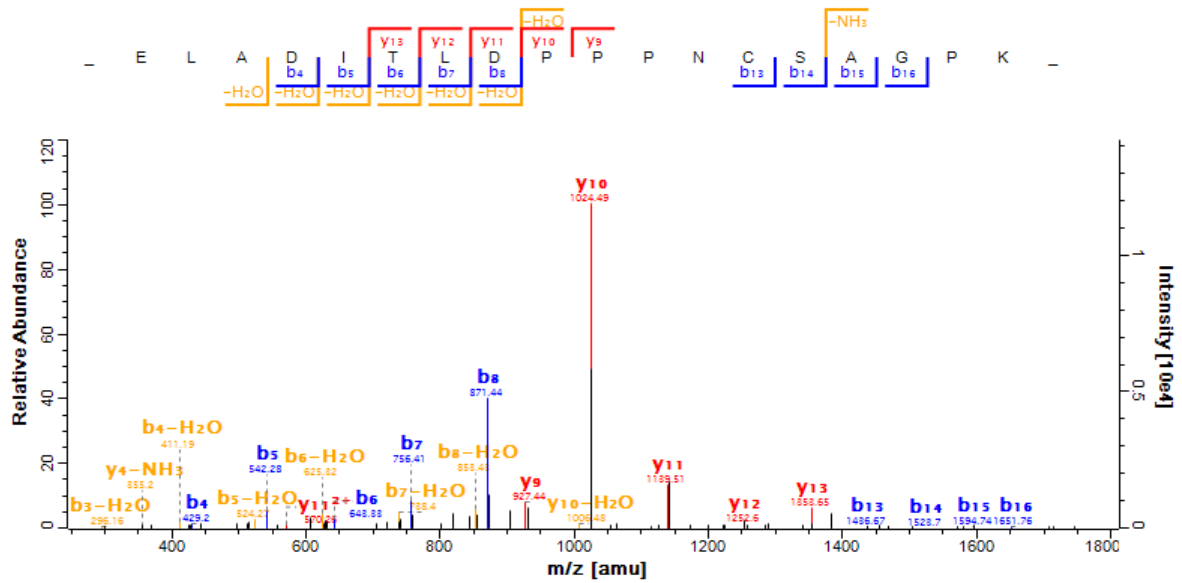

**Protein Group ID:** 488

**Protein Accession Numbers:** P10145-2; P10145; C9J4T6

**Gene Names:** IL8

**Peptide Sequence:** VIESGPHCANTEIIVK

**Total Number of Spectra:** 4

**Number of Replicates (out of 8):** 4

**Best Match Score:** 138.73

**Best Match Posterior Error Probability:** 2.89E-05

**Best Match Spectrum:**

|                    |           |                  |                                   |
|--------------------|-----------|------------------|-----------------------------------|
| <b>Scan number</b> | 26563     | <b>Raw file</b>  | A549-US-WT-top20CID-Elite-2ug-B12 |
| <b>Method</b>      | ITMS; CID | <b>Genenames</b> | IL8                               |

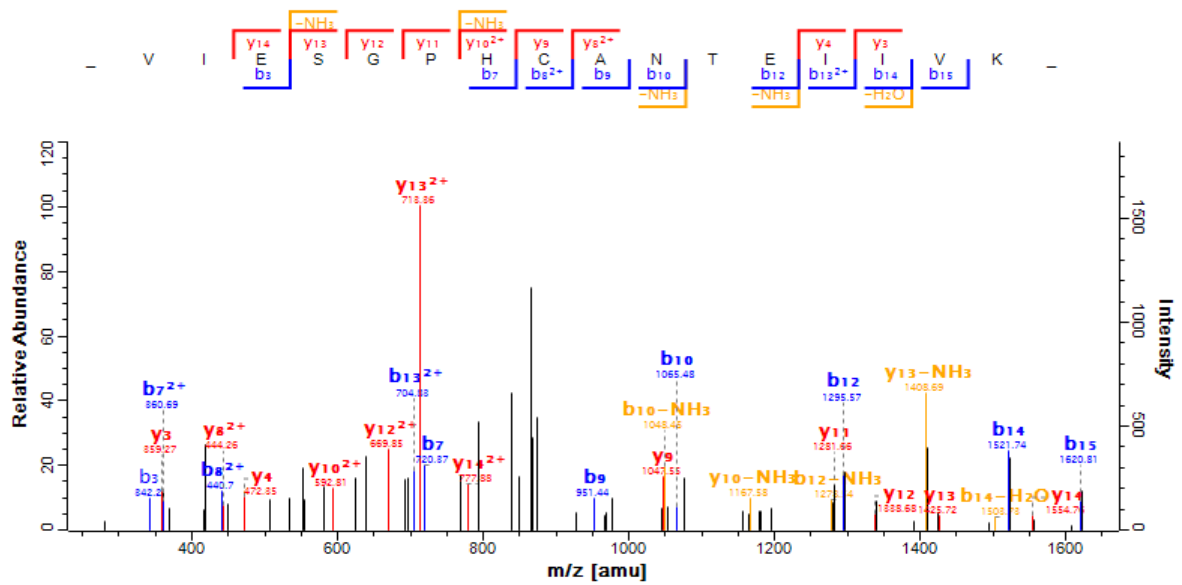

**Protein Group ID:** 490

**Protein Accession Numbers:** Q96S97; C9JC07; C9J5M0; C9JZL8; C9JJV6

**Gene Names:** MYADM

**Peptide Sequence:** TTITTTTSSSGLGSPMIVGSPR

**Total Number of Spectra:** 11

**Number of Replicates (out of 8):** 8

**Best Match Score:** 179.03

**Best Match Posterior Error Probability:** 9.43E-26

**Best Match Spectrum:**

**Scan number** 44761      **Raw file** A549-US-Mock-top20CID-Elite-2ug-B12  
**Method** ITMS; CID      **Genenames** MYADM

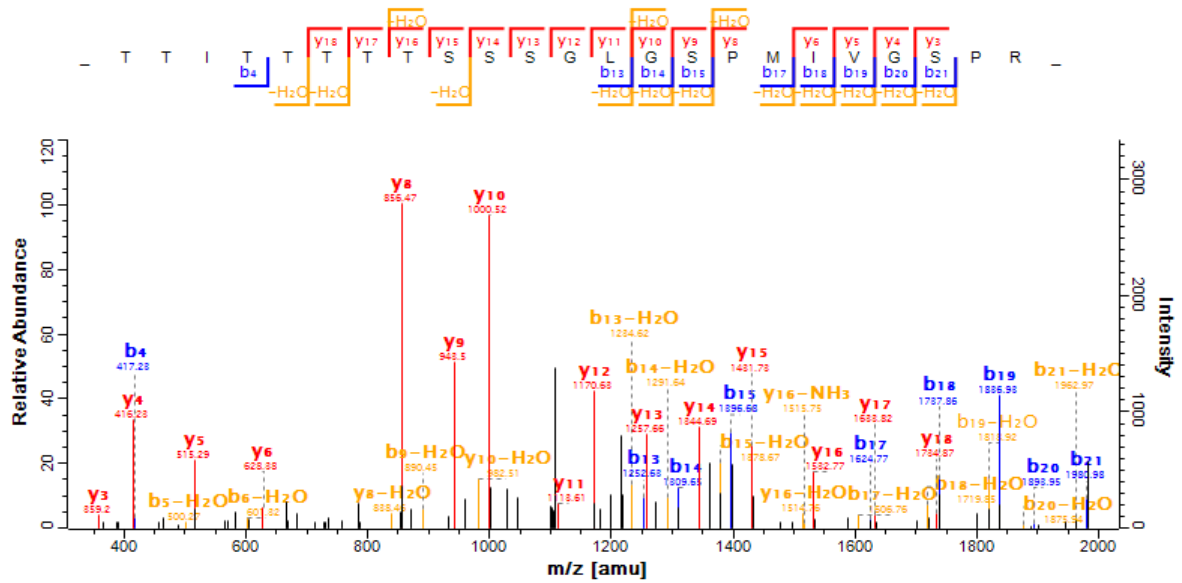

**Protein Group ID:** 492

**Protein Accession Numbers:** Q9UI15; C9J5W6; H7C5N2

**Gene Names:** TAGLN3

**Peptide Sequence:** TTDIFQTVDLWEGK

**Total Number of Spectra:** 2

**Number of Replicates (out of 8):** 2

**Best Match Score:** 139.66

**Best Match Posterior Error Probability:** 2.22E-05

**Best Match Spectrum:**

**Scan number** 73030      **Raw file** A549-US-Mock-top20CID-Elite-2ug-B11  
**Method** ITMS; CID      **Genenames** TAGLN3

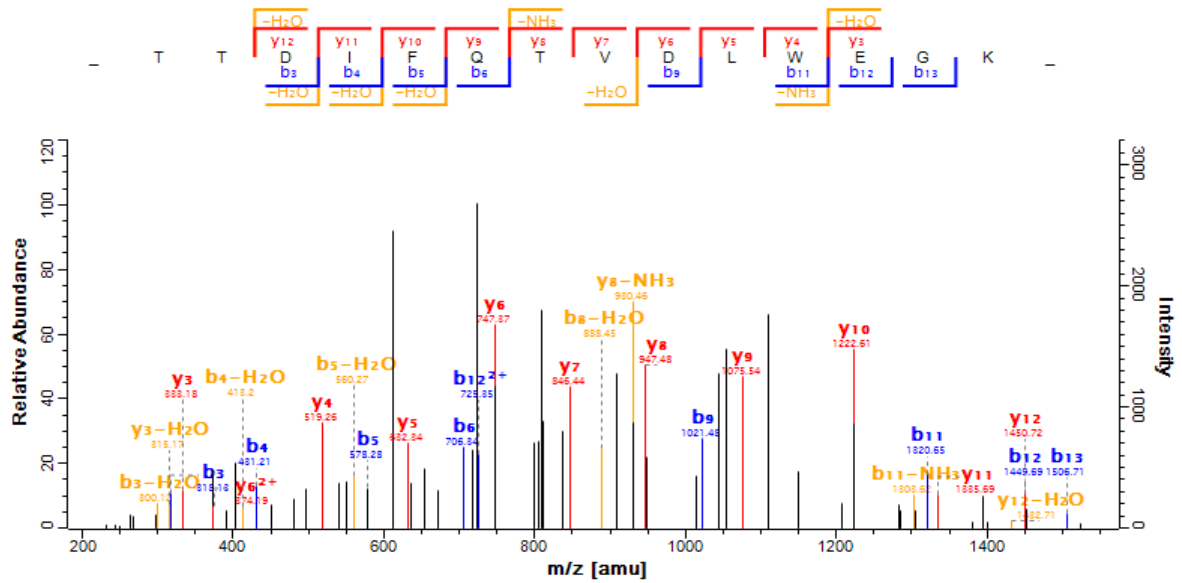

**Protein Group ID:** 496

**Protein Accession Numbers:** Q9NQS3; E9PFR0; Q9NQS3-2; H7C4L0; C9JMW3; C9J795

**Gene Names:** PVRL3

**Peptide Sequence:** SSQTVAVHHPQYGFSVQGEYQGR

**Total Number of Spectra:** 3

**Number of Replicates (out of 8):** 3

**Best Match Score:** 145.02

**Best Match Posterior Error Probability:** 4.40E-14

**Best Match Spectrum:**

**Scan number** 31426      **Raw file** A549-US-Mock-top20CID-Elite-2ug-B12  
**Method** ITMS; CID      **Genenames** PVRL3

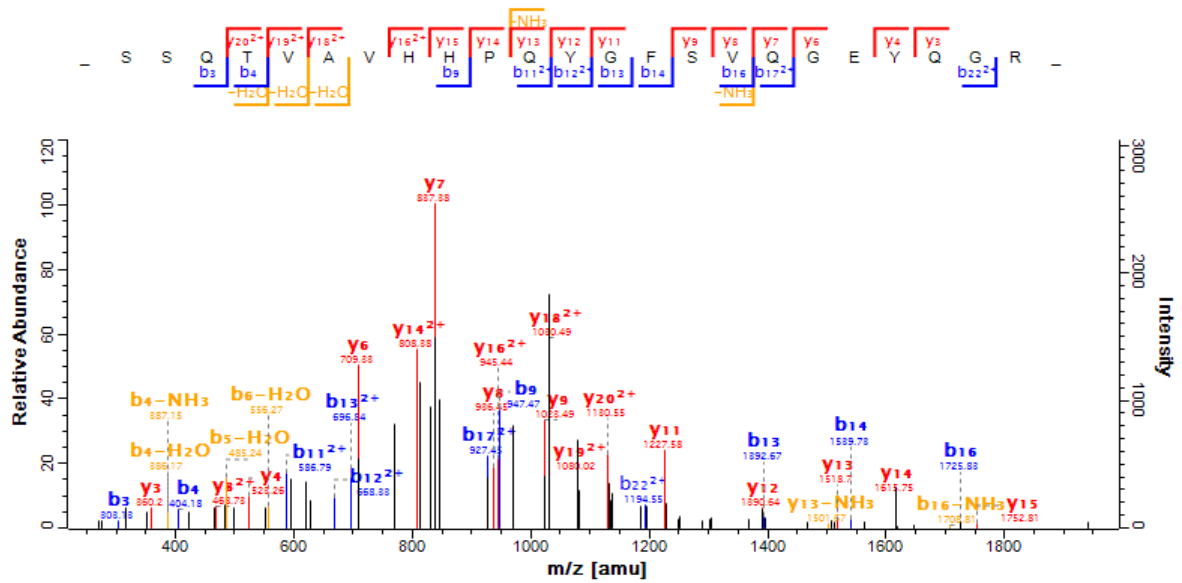



**Protein Group ID:** 500  
**Protein Accession Numbers:** C9J8T6; Q14061  
**Gene Names:** COX17  
**Peptide Sequence:** PGLVDSNPAPPESQEK  
**Total Number of Spectra:** 6  
**Number of Replicates (out of 8):** 6  
**Best Match Score:** 147.64  
**Best Match Posterior Error Probability:** 1.71E-06  
**Best Match Spectrum:**

**Scan number** 21109      **Raw file** A549-US-Mock-top20CID-Elite-2ug-B13  
**Method** ITMS; CID      **Genenames** COX17

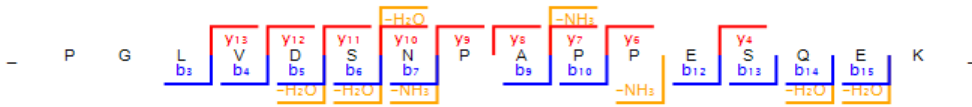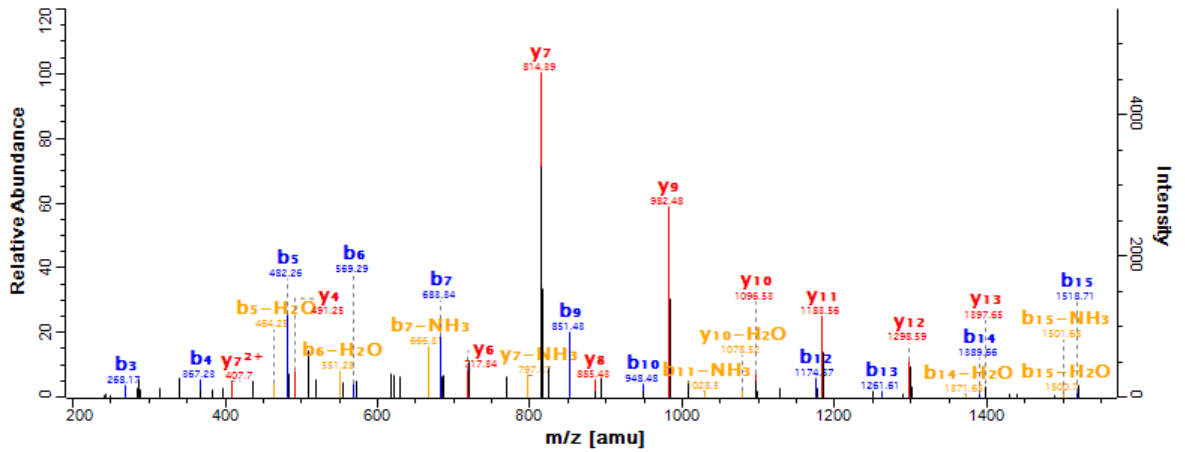

**Protein Group ID:** 502

**Protein Accession Numbers:** E7EUN2; Q96P47-4; Q96P47-2; Q96P47; Q9UPQ3; Q9UPQ3-2; E7ESL9; Q9UPQ3-3; E9PAL8; Q96P47-3; C9J975; H7C4F1; C9J8Z2

**Gene Names:** AGAP1;AGAP3

**Peptide Sequence:** YLTGTYYVQEQESPEGR

**Total Number of Spectra:** 1

**Number of Replicates (out of 8):** 1

**Best Match Score:** 76.341

**Best Match Posterior Error Probability:** 0.0027146

**Best Match Spectrum:**

|                    |           |                  |                                   |
|--------------------|-----------|------------------|-----------------------------------|
| <b>Scan number</b> | 29452     | <b>Raw file</b>  | A549-US-WT-top20CID-Elite-2ug-B14 |
| <b>Method</b>      | ITMS; CID | <b>Genenames</b> | AGAP1;AGAP3                       |

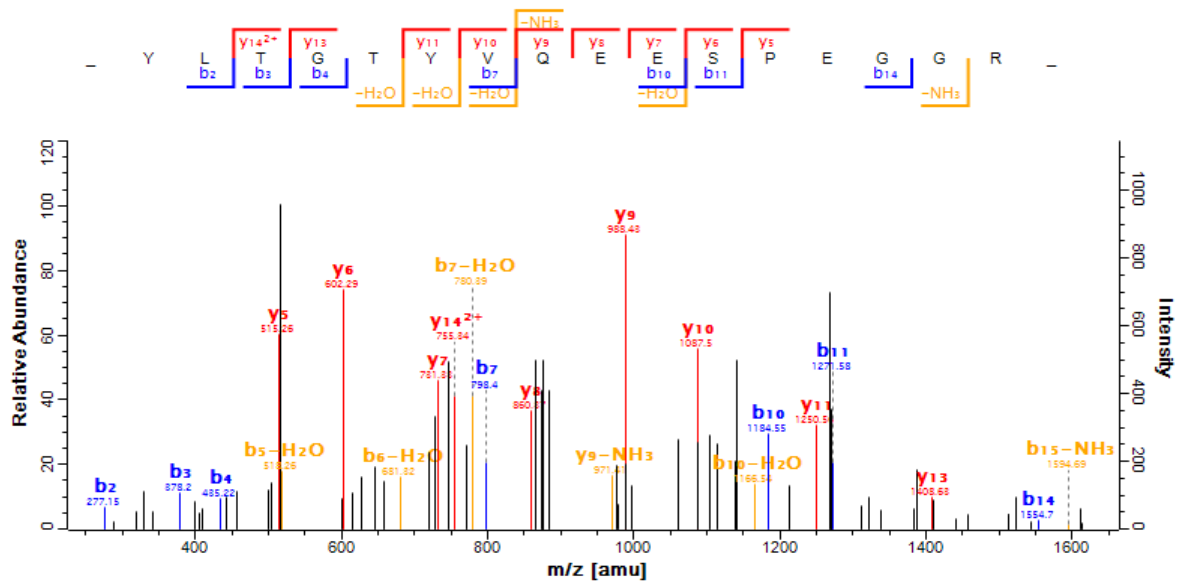

**Protein Group ID:** 504

**Protein Accession Numbers:** P51668; Q9Y2X8; C9J9H9; Q9UQL0; H0YGA2

**Gene Names:** UBE2D1;UBE2D4

**Peptide Sequence:** SQWSPALTVSK

**Total Number of Spectra:** 1

**Number of Replicates (out of 8):** 1

**Best Match Score:** 92.247

**Best Match Posterior Error Probability:** 0.0012443

**Best Match Spectrum:**

**Scan number** 35233      **Raw file** A549-US-WT-top20CID-Elite-2ug-B11  
**Method** ITMS; CID      **Genenames** UBE2D1;UBE2D4

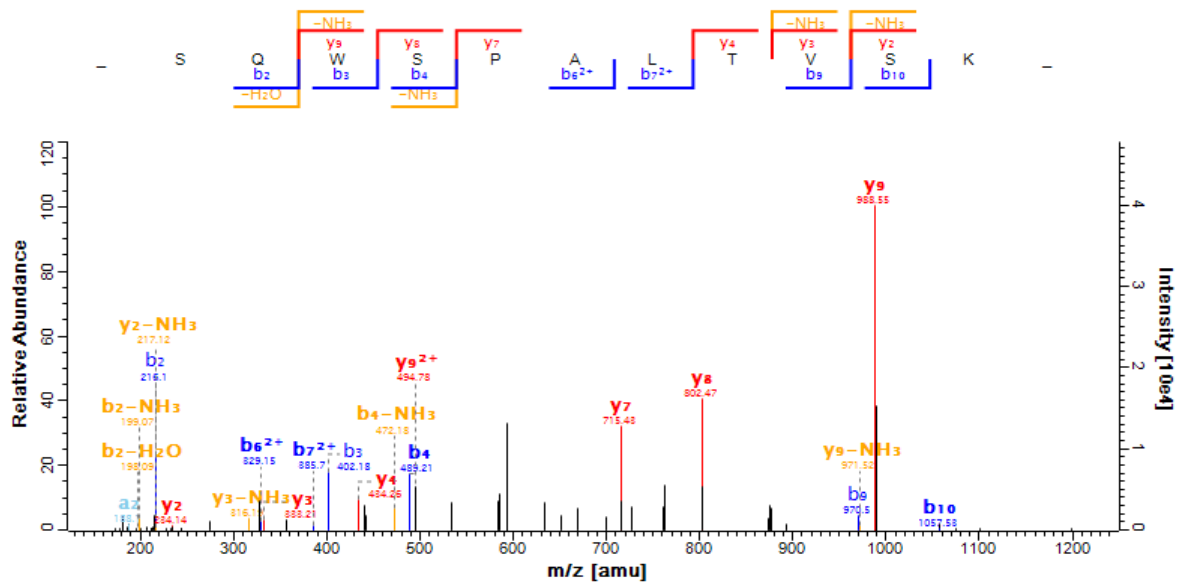

**Protein Group ID:** 507

**Protein Accession Numbers:** P18564; E9PEE8; C9JA97

**Gene Names:** ITGB6

**Peptide Sequence:** LGFGSFVEK

**Total Number of Spectra:** 8

**Number of Replicates (out of 8):** 8

**Best Match Score:** 132.01

**Best Match Posterior Error Probability:** 9.50E-05

**Best Match Spectrum:**

|                    |           |                  |                                     |
|--------------------|-----------|------------------|-------------------------------------|
| <b>Scan number</b> | 43640     | <b>Raw file</b>  | A549-US-Mock-top20CID-Elite-2ug-B11 |
| <b>Method</b>      | ITMS; CID | <b>Genenames</b> | ITGB6                               |

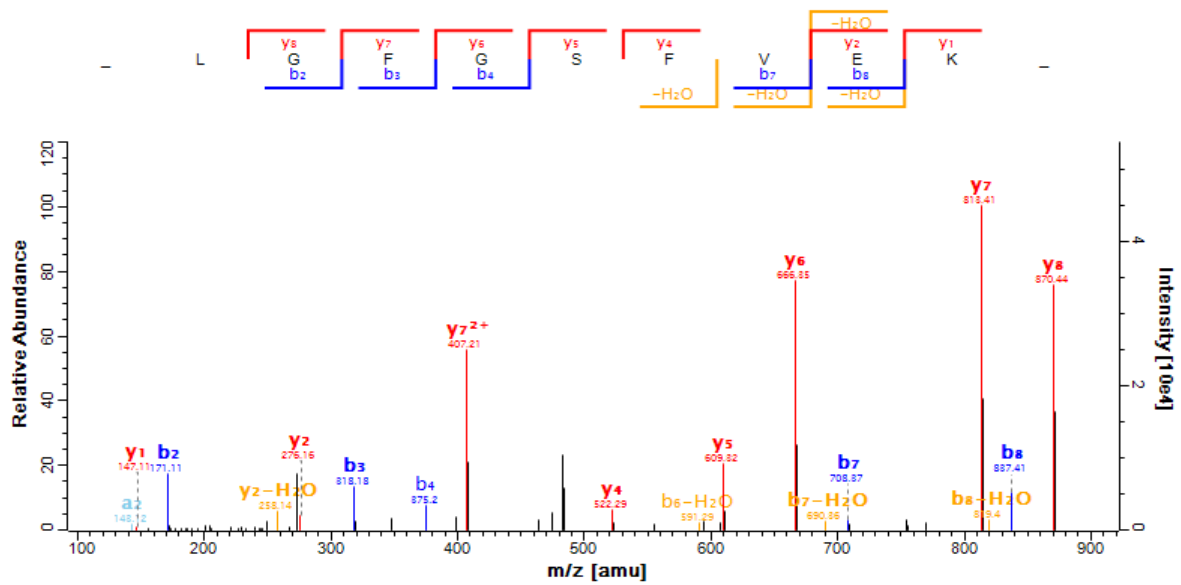

**Protein Group ID:** 511

**Protein Accession Numbers:** Q6H3X3; Q5VY80; Q9BZM5; C9JAK3; Q6H3X3-2

**Gene Names:** RAET1G;RAET1L;ULBP2

**Peptide Sequence:** WCAVQGGVDEK

**Total Number of Spectra:** 1

**Number of Replicates (out of 8):** 1

**Best Match Score:** 79.659

**Best Match Posterior Error Probability:** 0.0040191

**Best Match Spectrum:**

**Scan number** 18989      **Raw file** A549-US-Mock-top20CID-Elite-2ug-B12  
**Method** ITMS; CID      **Genenames** RAET1G;RAET1L;ULBP2

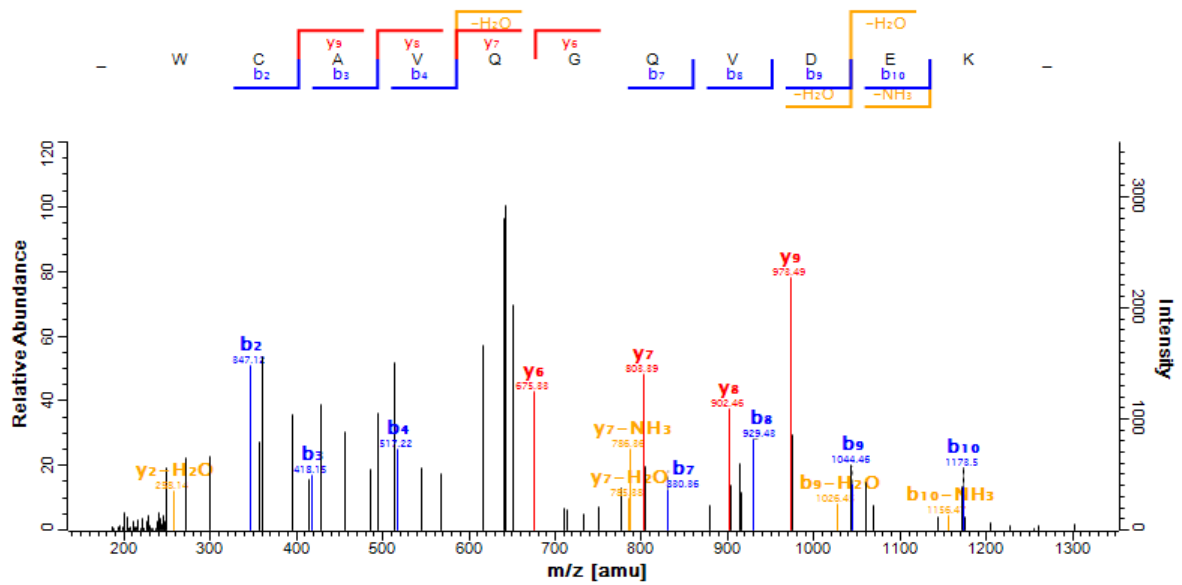

**Protein Group ID:** 512

**Protein Accession Numbers:** C9JNU6; Q9Y241; C9JAW5

**Gene Names:** HIGD1A

**Peptide Sequence:** STDTGVSLPSYEEDQGSK

**Total Number of Spectra:** 6

**Number of Replicates (out of 8):** 6

**Best Match Score:** 123.42

**Best Match Posterior Error Probability:** 7.49E-05

**Best Match Spectrum:**

**Scan number** 39668      **Raw file** A549-US-Mock-top20CID-Elite-2ug-B14  
**Method** ITMS; CID      **Genenames** HIGD1A

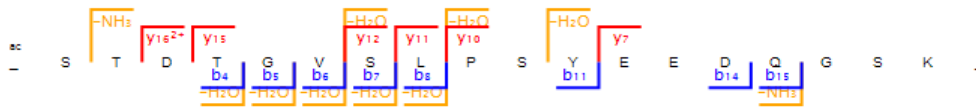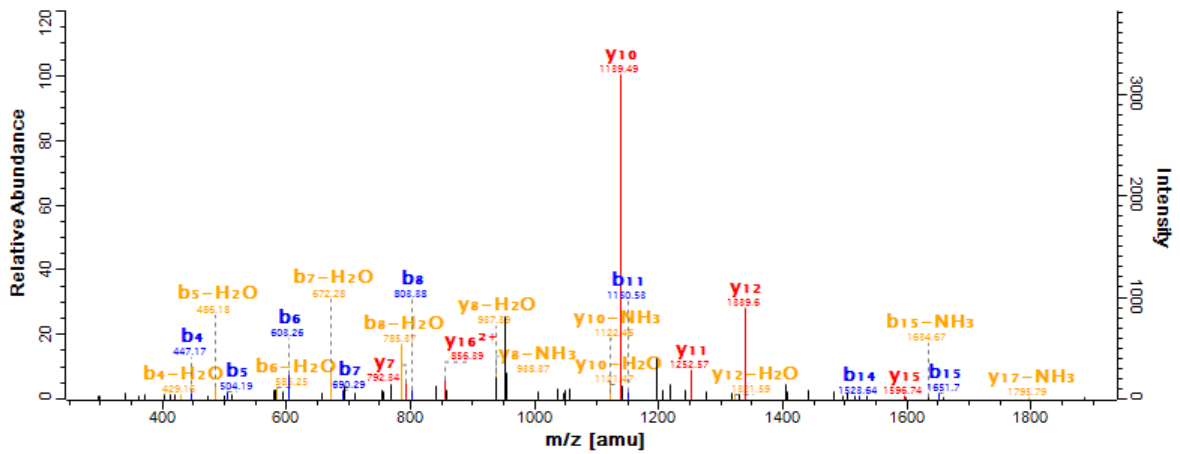

**Protein Group ID:** 516  
**Protein Accession Numbers:** Q9Y6A9; C9JBL1  
**Gene Names:** SPCS1  
**Peptide Sequence:** WLPVQESSTDDK  
**Total Number of Spectra:** 2  
**Number of Replicates (out of 8):** 2  
**Best Match Score:** 78.903  
**Best Match Posterior Error Probability:** 0.0036177  
**Best Match Spectrum:**

**Scan number** 28921      **Raw file** A549-US-Mock-top20CID-Elite-2ug-B12  
**Method** ITMS; CID      **Genenames** SPCS1

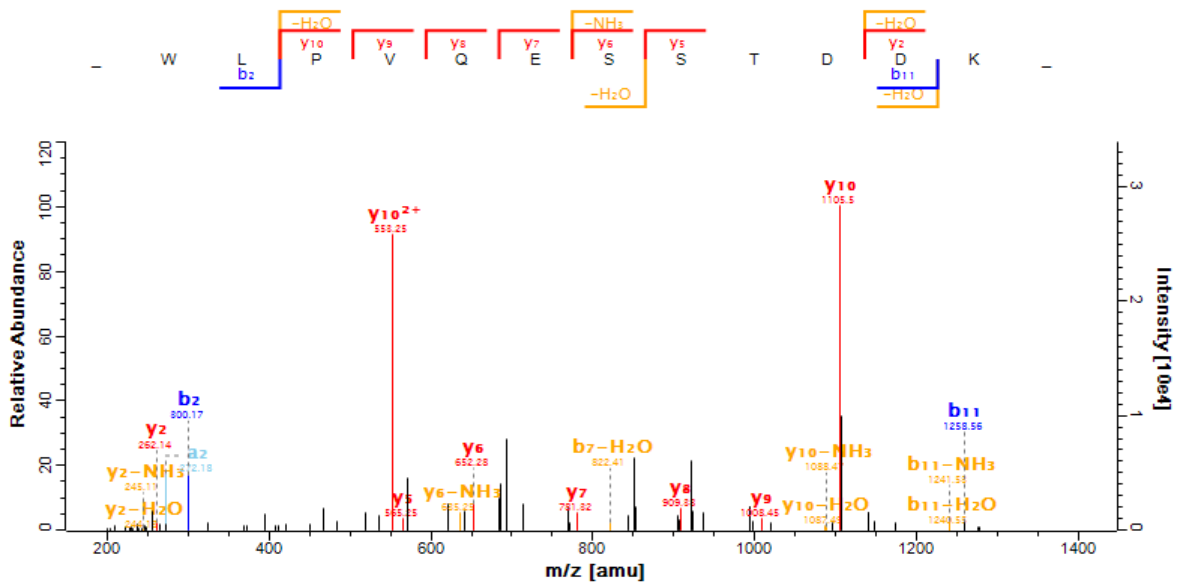





**Protein Group ID:** 521

**Protein Accession Numbers:** Q9BVT8; C9JCW7; C9JE12

**Gene Names:** TMUB1

**Peptide Sequence:** HRGQAAQPEPSTGFTATPPAPDPSPEPLVLR

**Total Number of Spectra:** 7

**Number of Replicates (out of 8):** 7

**Best Match Score:** 94.72

**Best Match Posterior Error Probability:** 3.32E-07

**Best Match Spectrum:**

**Scan number** 46131      **Raw file** A549-US-Mock-top20CID-Elite-2ug-B11  
**Method** ITMS; CID      **Genenames** TMUB1

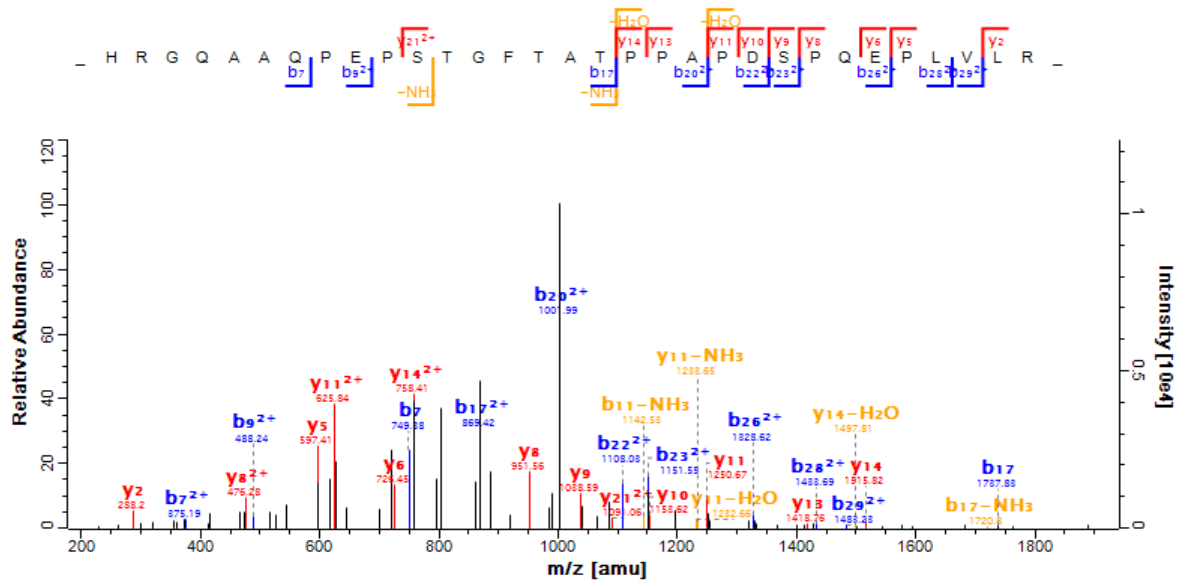

**Protein Group ID: 522**

**Protein Accession Numbers:** Q8WW22-2; Q8WW22; E9PDM9; F5H170; C9JDE6

**Gene Names:** DNAJA4

**Peptide Sequence:** NVVHQLSVTLEDL YGVTK

**Total Number of Spectra:** 1

**Number of Replicates (out of 8):** 1

**Best Match Score:** 103.88

**Best Match Posterior Error Probability:** 0.00058402

**Best Match Spectrum:**

|                    |           |                  |                                     |
|--------------------|-----------|------------------|-------------------------------------|
| <b>Scan number</b> | 69374     | <b>Raw file</b>  | A549-US-Mock-top20CID-Elite-2ug-B11 |
| <b>Method</b>      | ITMS; CID | <b>Genenames</b> | DNAJA4                              |

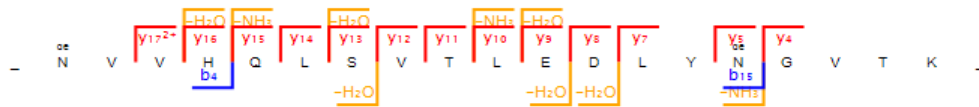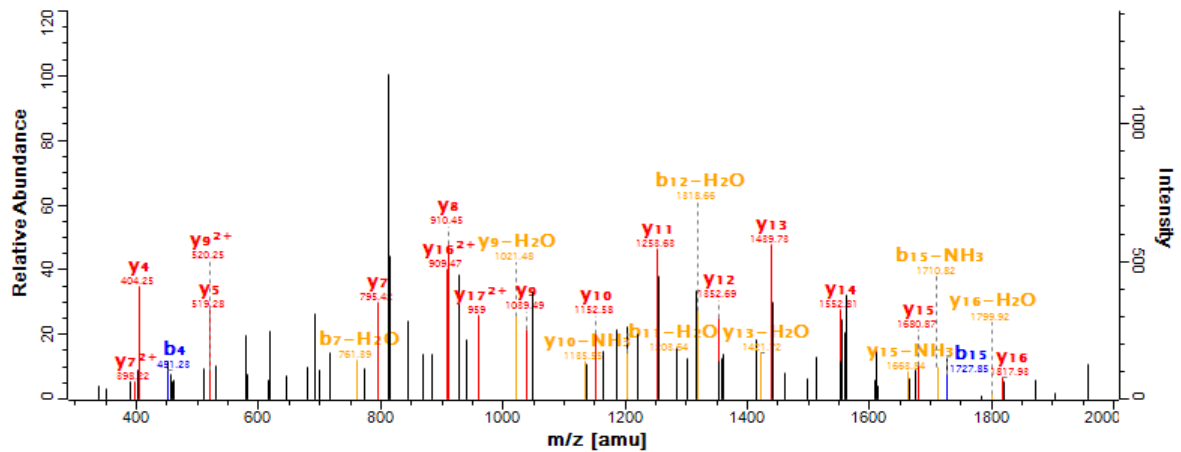

**Protein Group ID:** 528

**Protein Accession Numbers:** Q8IX18; Q8IX18-2; C9JEW8; Q8IX18-3; C9JR60; F5H625

**Gene Names:** DHX40

**Peptide Sequence:** LGLDILEVVPISK

**Total Number of Spectra:** 4

**Number of Replicates (out of 8):** 3

**Best Match Score:** 161.21

**Best Match Posterior Error Probability:** 2.12E-09

**Best Match Spectrum:**

**Scan number** 79266      **Raw file** A549-US-Mock-top20CID-Elite-2ug-B11  
**Method** ITMS; CID      **Genenames** DHX40

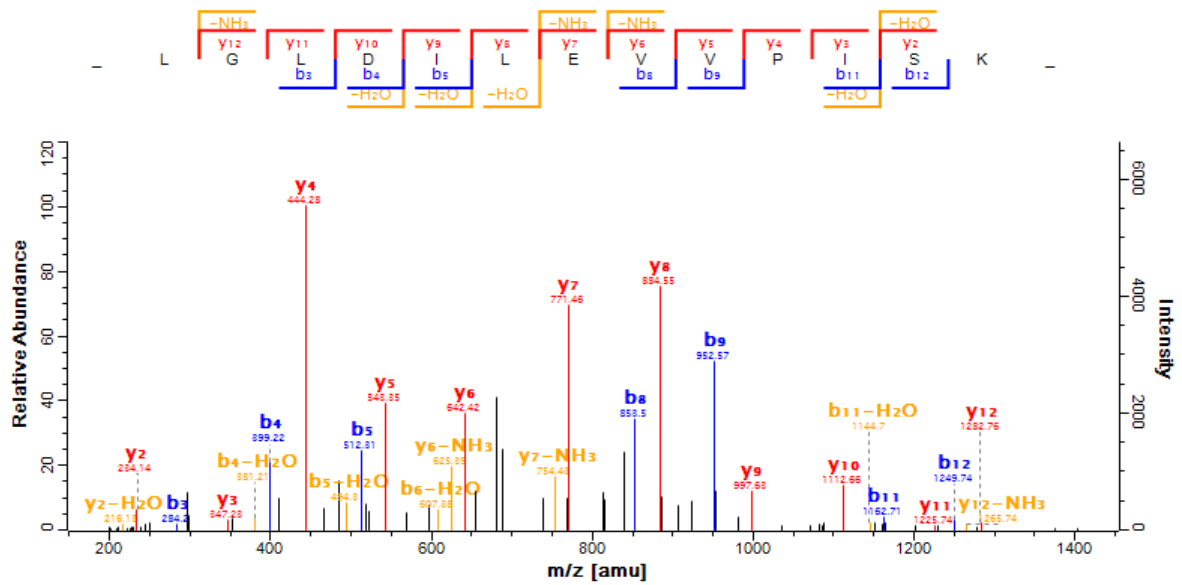

**Protein Group ID:** 529  
**Protein Accession Numbers:** Q9UKI2; C9JEZ4  
**Gene Names:** CDC42EP3  
**Peptide Sequence:** ANSTSDSVFTETPSPVLK  
**Total Number of Spectra:** 1  
**Number of Replicates (out of 8):** 1  
**Best Match Score:** 77.969  
**Best Match Posterior Error Probability:** 0.0014644  
**Best Match Spectrum:**

**Scan number** 44766      **Raw file** A549-US-Mock-top20CID-Elite-2ug-B11  
**Method** ITMS; CID      **Genenames** CDC42EP3

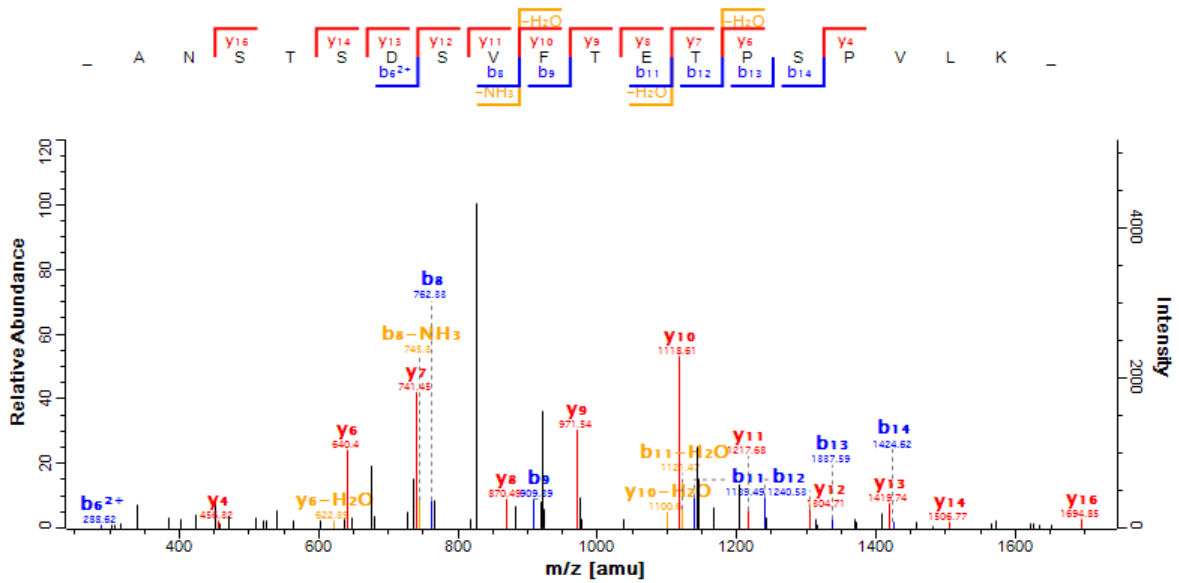

**Protein Group ID:** 536

**Protein Accession Numbers:** P30039; C9JIM0; F8W7D0

**Gene Names:** PBLD

**Peptide Sequence:** LPIFIADAFTAR

**Total Number of Spectra:** 1

**Number of Replicates (out of 8):** 1

**Best Match Score:** 111.94

**Best Match Posterior Error Probability:** 0.0011698

**Best Match Spectrum:**

|                    |           |                  |                                   |
|--------------------|-----------|------------------|-----------------------------------|
| <b>Scan number</b> | 76033     | <b>Raw file</b>  | A549-US-WT-top20CID-Elite-2ug-B12 |
| <b>Method</b>      | ITMS; CID | <b>Genenames</b> | PBLD                              |

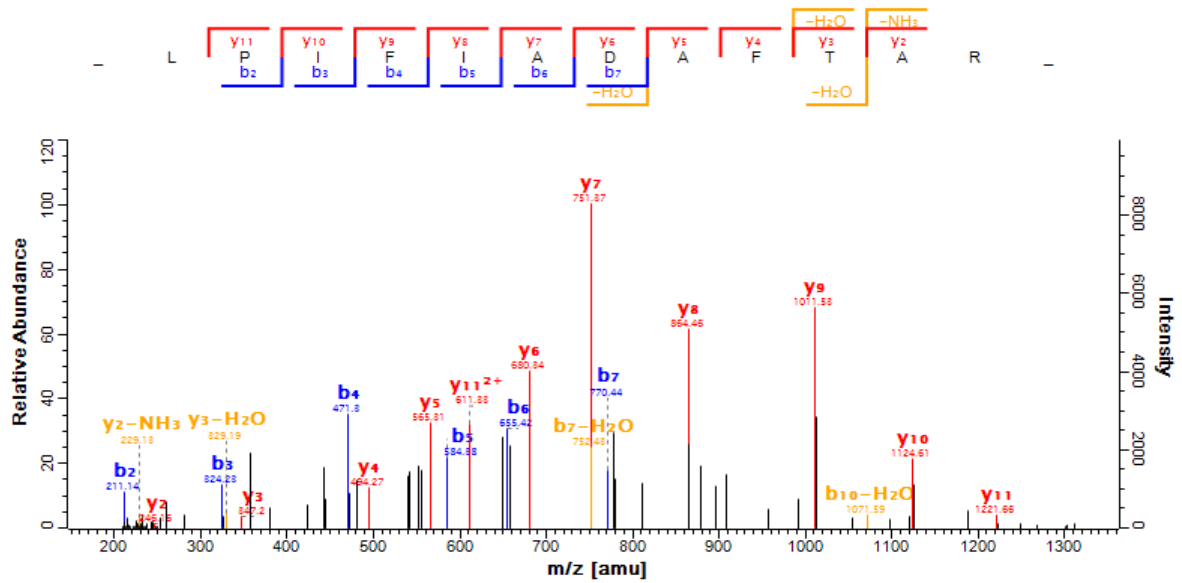

**Protein Group ID:** 540

**Protein Accession Numbers:** Q9NVE5-3; Q9NVE5; C9JK14

**Gene Names:** USP40

**Peptide Sequence:** EALFSLGPEELGLFEDK

**Total Number of Spectra:** 1

**Number of Replicates (out of 8):** 1

**Best Match Score:** 74.12

**Best Match Posterior Error Probability:** 0.0028163

**Best Match Spectrum:**

**Scan number** 85096      **Raw file** A549-US-Mock-top20CID-Elite-2ug-B12  
**Method** ITMS; CID      **Genenames** USP40

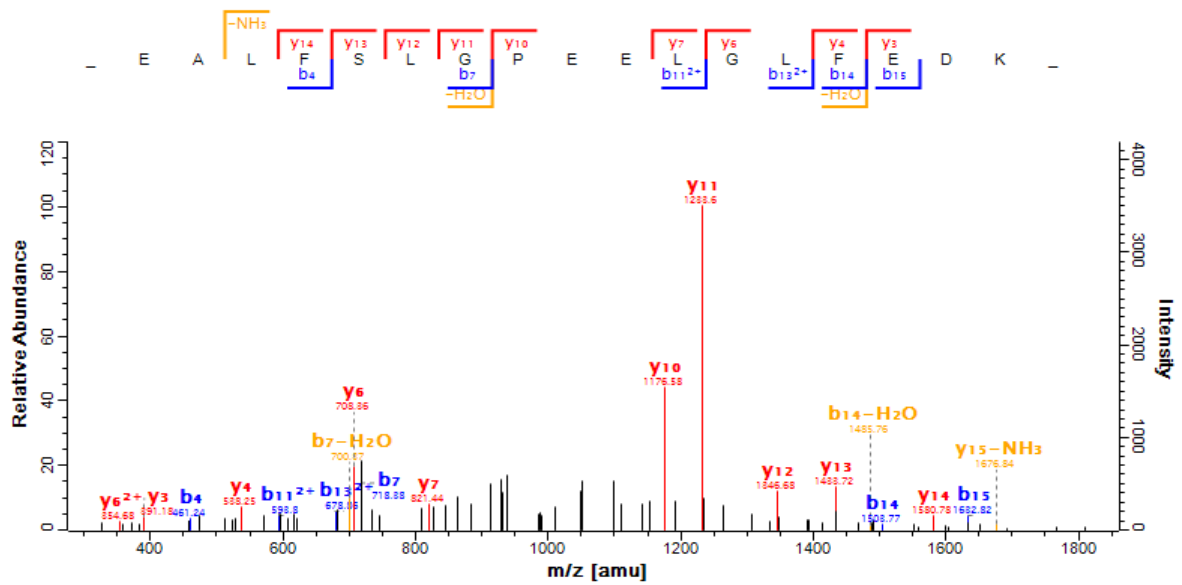

**Protein Group ID:** 541

**Protein Accession Numbers:** Q9Y4F3; Q9Y4F3-5; Q9Y4F3-4; Q9Y4F3-3; G8JLP4; C9JKX0; F8VVB8

**Gene Names:** KIAA0430

**Peptide Sequence:** AVVQMENLQDAIGAVNSLHR

**Total Number of Spectra:** 1

**Number of Replicates (out of 8):** 1

**Best Match Score:** 72.207

**Best Match Posterior Error Probability:** 0.0073584

**Best Match Spectrum:**

**Scan number** 66911      **Raw file** A549-US-Mock-top20CID-Elite-2ug-B13  
**Method** ITMS; CID      **Genenames** KIAA0430

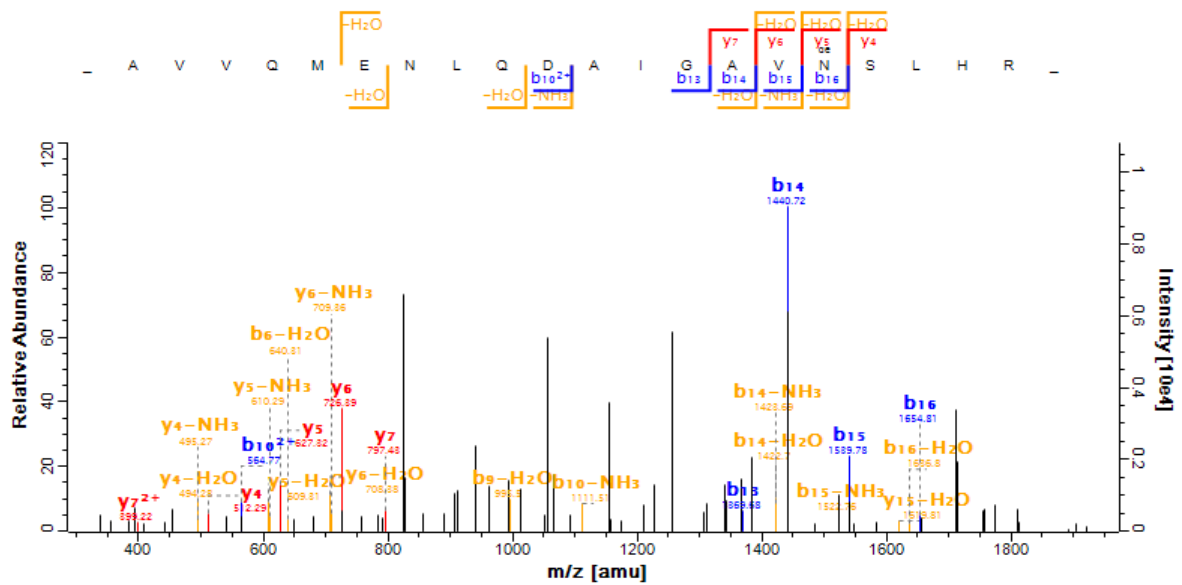

**Protein Group ID:** 545

**Protein Accession Numbers:** Q9BQ15; C9JMP5; C9JT95

**Gene Names:** OBFC2B

**Peptide Sequence:** IGEFCMVYSEVPNFSEVPNPEYSTQQAQAPNK

**Total Number of Spectra:** 3

**Number of Replicates (out of 8):** 2

**Best Match Score:** 72.302

**Best Match Posterior Error Probability:** 3.40E-05

**Best Match Spectrum:**

**Scan number** 68077      **Raw file** A549-US-Mock-top20CID-Elite-2ug-B11  
**Method** ITMS; CID      **Genenames** OBFC2B

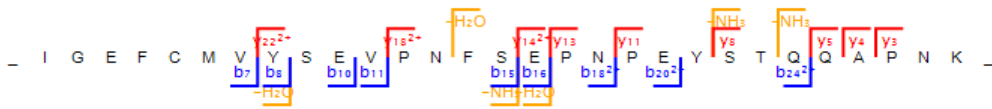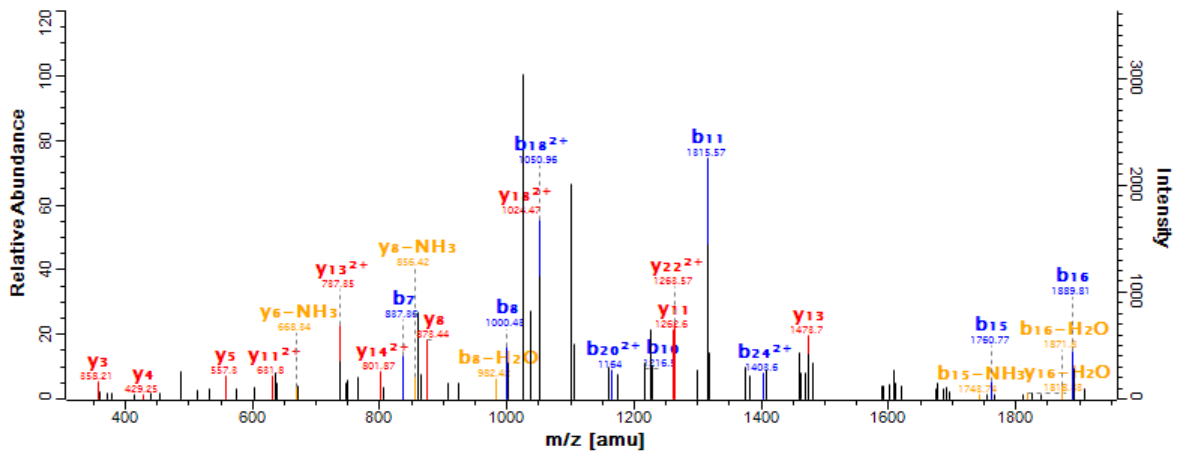



**Protein Group ID:** 549

**Protein Accession Numbers:** Q96IW7; C9JNZ0; C9JRY4

**Gene Names:** SEC22A

**Peptide Sequence:** INLSDMQTEIK

**Total Number of Spectra:** 2

**Number of Replicates (out of 8):** 2

**Best Match Score:** 100.04

**Best Match Posterior Error Probability:** 0.00051486

**Best Match Spectrum:**

|                    |           |                  |                                   |
|--------------------|-----------|------------------|-----------------------------------|
| <b>Scan number</b> | 43478     | <b>Raw file</b>  | A549-US-WT-top20CID-Elite-2ug-B11 |
| <b>Method</b>      | ITMS; CID | <b>Genenames</b> | SEC22A                            |

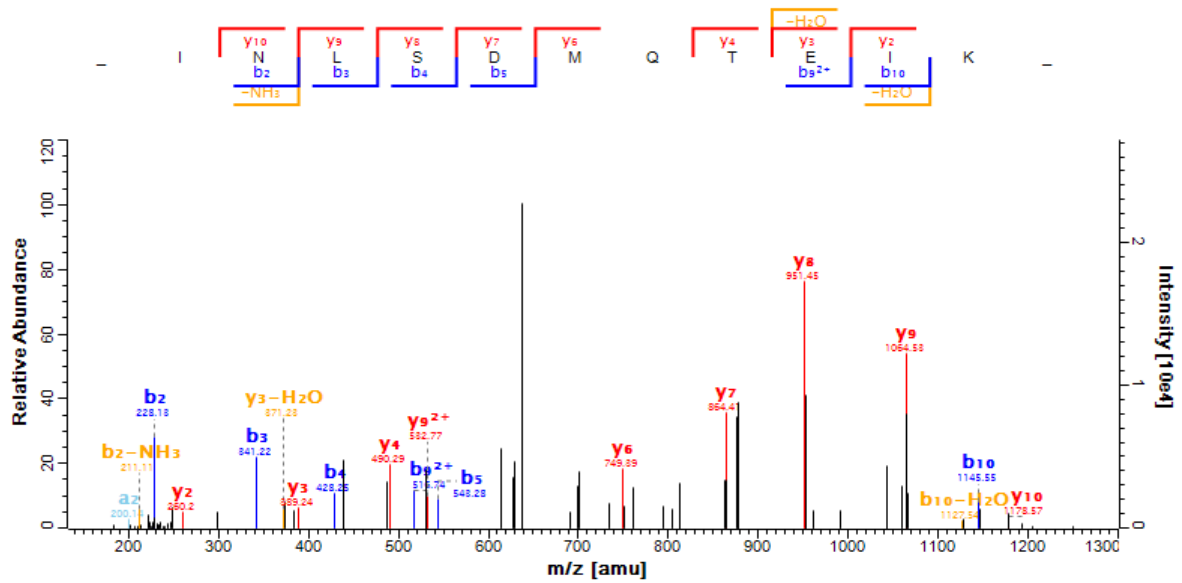

**Protein Group ID:** 551

**Protein Accession Numbers:** H7BXP1; Q9NYR9; C9JPP2; Q9NYR9-2; K7ERG2; Q9NYR9-3

**Gene Names:** NKIRAS2

**Peptide Sequence:** SLLEPFVYLSK

**Total Number of Spectra:** 2

**Number of Replicates (out of 8):** 2

**Best Match Score:** 87.001

**Best Match Posterior Error Probability:** 0.0017681

**Best Match Spectrum:**

|                    |           |                  |                                     |
|--------------------|-----------|------------------|-------------------------------------|
| <b>Scan number</b> | 76608     | <b>Raw file</b>  | A549-US-Mock-top20CID-Elite-2ug-B14 |
| <b>Method</b>      | ITMS; CID | <b>Genenames</b> | NKIRAS2                             |

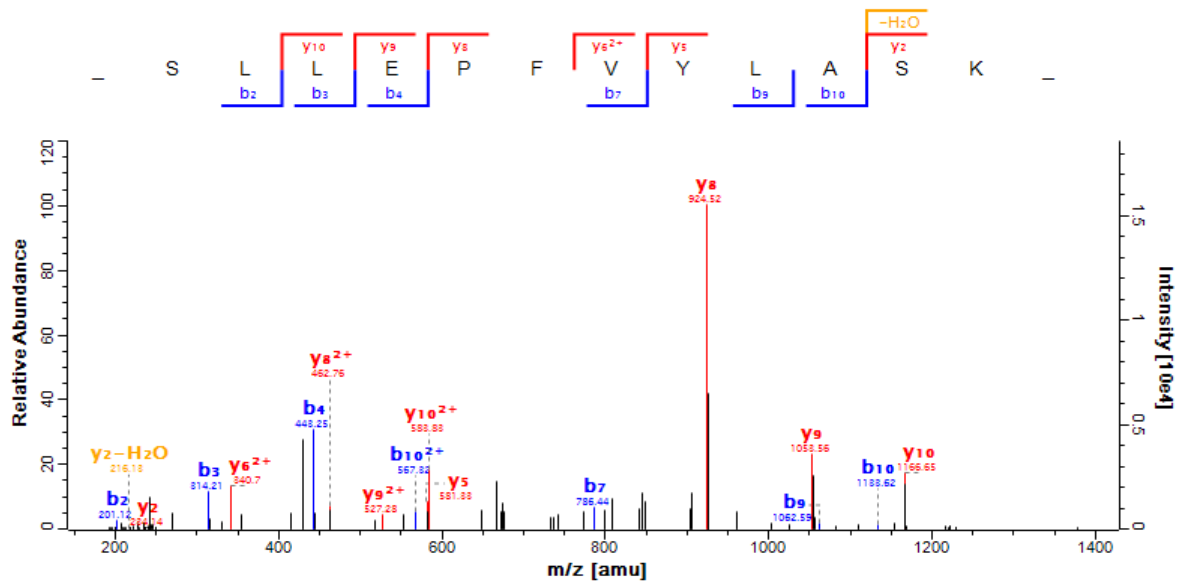

**Protein Group ID:** 559

**Protein Accession Numbers:** C9JRZ8

**Gene Names:** AKR1B15

**Peptide Sequence:** VLQMEPQVNSTNNFHHQGPLDQPVGPLTGLK

**Total Number of Spectra:** 1

**Number of Replicates (out of 8):** 1

**Best Match Score:** 55.526

**Best Match Posterior Error Probability:** 0.010706

**Best Match Spectrum:**

**Scan number** 31724      **Raw file** A549-US-WT-top20CID-Elite-2ug-B13  
**Method** ITMS; CID      **Genenames** AKR1B15

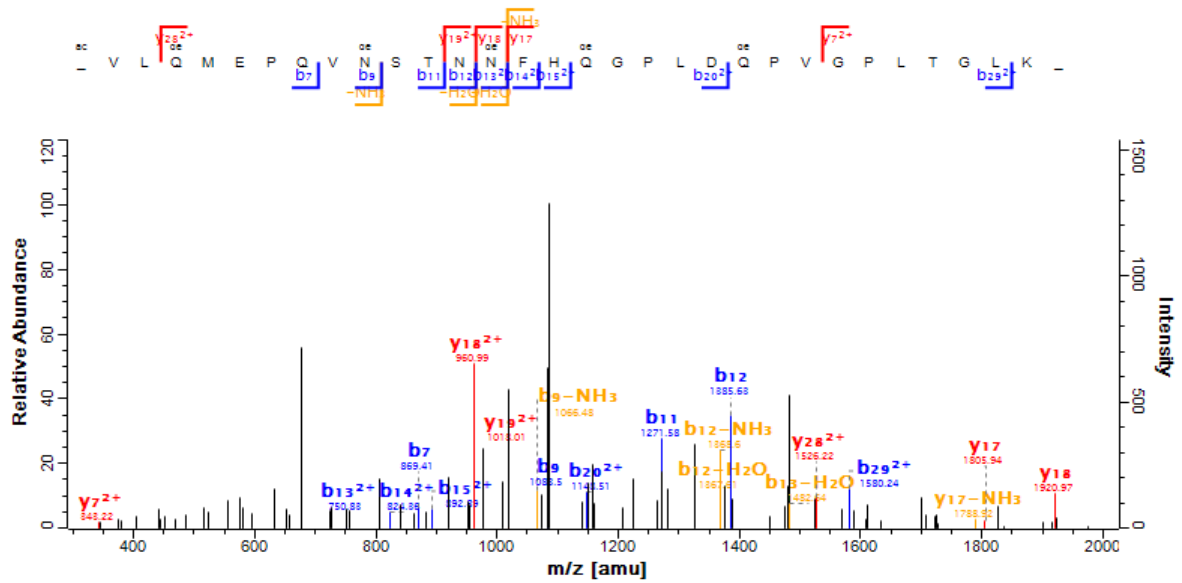

**Protein Group ID:** 560  
**Protein Accession Numbers:** Q9NWR8; C9JTJ6  
**Gene Names:** CCDC109B  
**Peptide Sequence:** PMLSTVGSFLQLQNK  
**Total Number of Spectra:** 1  
**Number of Replicates (out of 8):** 1  
**Best Match Score:** 74.428  
**Best Match Posterior Error Probability:** 0.0021238  
**Best Match Spectrum:**

**Scan number** 84990      **Raw file** A549-US-WT-top20CID-Elite-2ug-B12  
**Method** ITMS; CID      **Genenames** CCDC109B

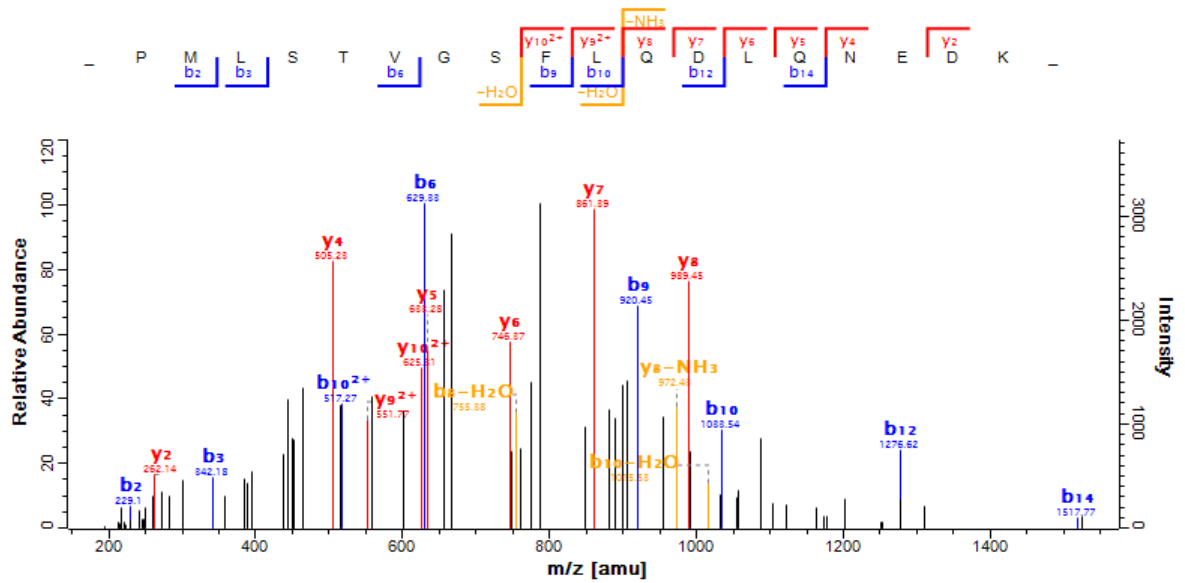

**Protein Group ID:** 562

**Protein Accession Numbers:** P08962; C9JV86; F8VWK8; F8W022; P08962-2; F8VZE2; F8VV56; F8VNT9

**Gene Names:** CD63

**Peptide Sequence:** VMSEFNNFR

**Total Number of Spectra:** 6

**Number of Replicates (out of 8):** 5

**Best Match Score:** 135.43

**Best Match Posterior Error Probability:** 8.38E-06

**Best Match Spectrum:**

|                    |           |                  |                                     |
|--------------------|-----------|------------------|-------------------------------------|
| <b>Scan number</b> | 30622     | <b>Raw file</b>  | A549-US-Mock-top20CID-Elite-2ug-B13 |
| <b>Method</b>      | ITMS: CID | <b>Genenames</b> | CD63                                |

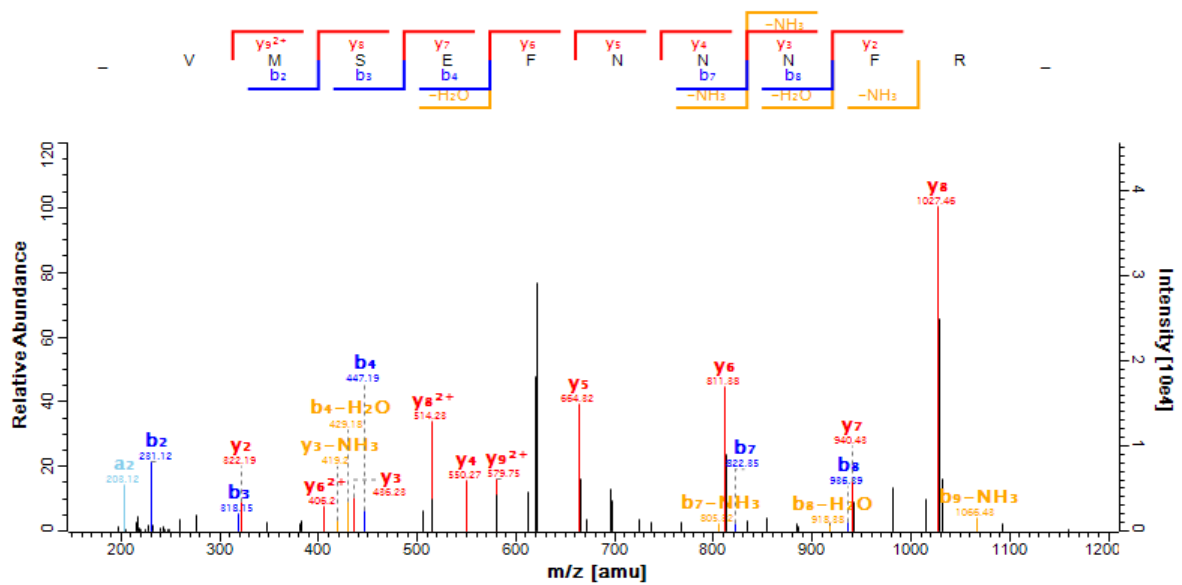

**Protein Group ID:** 563

**Protein Accession Numbers:** Q9BQE9; C9JWD3; Q9BQE9-2

**Gene Names:** BCL7B

**Peptide Sequence:** RFCVDQPTVPQTASES

**Total Number of Spectra:** 1

**Number of Replicates (out of 8):** 1

**Best Match Score:** 85.988

**Best Match Posterior Error Probability:** 0.0021846

**Best Match Spectrum:**

**Scan number** 33032      **Raw file** A549-US-WT-top20CID-Elite-2ug-B12  
**Method** ITMS; CID      **Genenames** BCL7B

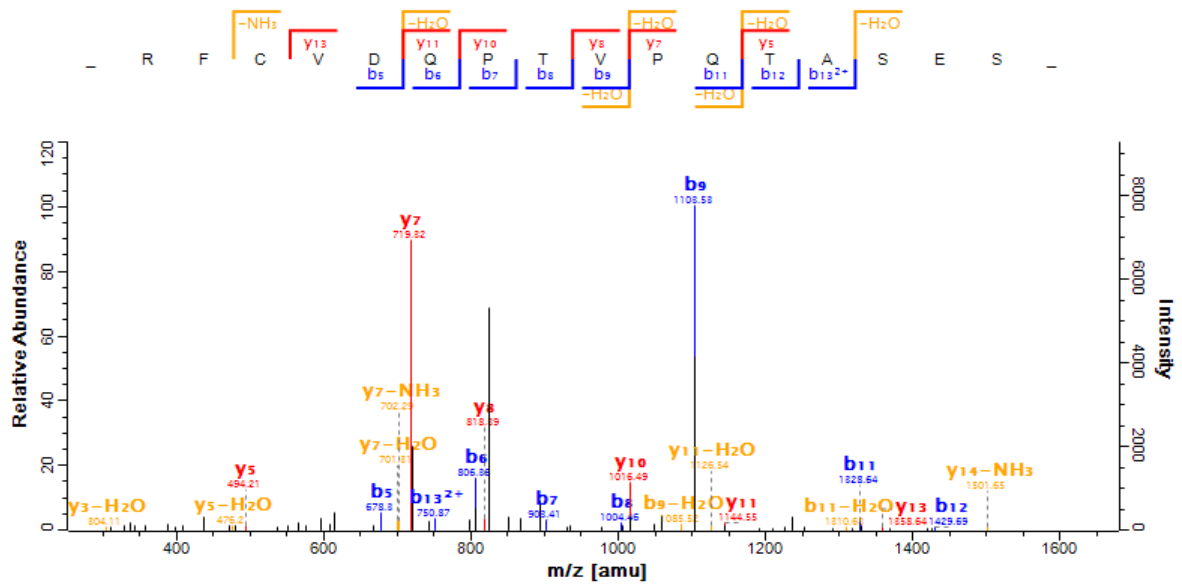

**Protein Group ID:** 568

**Protein Accession Numbers:** O95168; O95168-2; C9JXQ9; F2Z3P9

**Gene Names:** NDUFB4

**Peptide Sequence:** TLPETLDPAEYNISPETR

**Total Number of Spectra:** 9

**Number of Replicates (out of 8):** 8

**Best Match Score:** 142.35

**Best Match Posterior Error Probability:** 9.11E-06

**Best Match Spectrum:**

**Scan number** 54306      **Raw file** A549-US-Mock-top20CID-Elite-2ug-B12  
**Method** ITMS; CID      **Genenames** NDUFB4

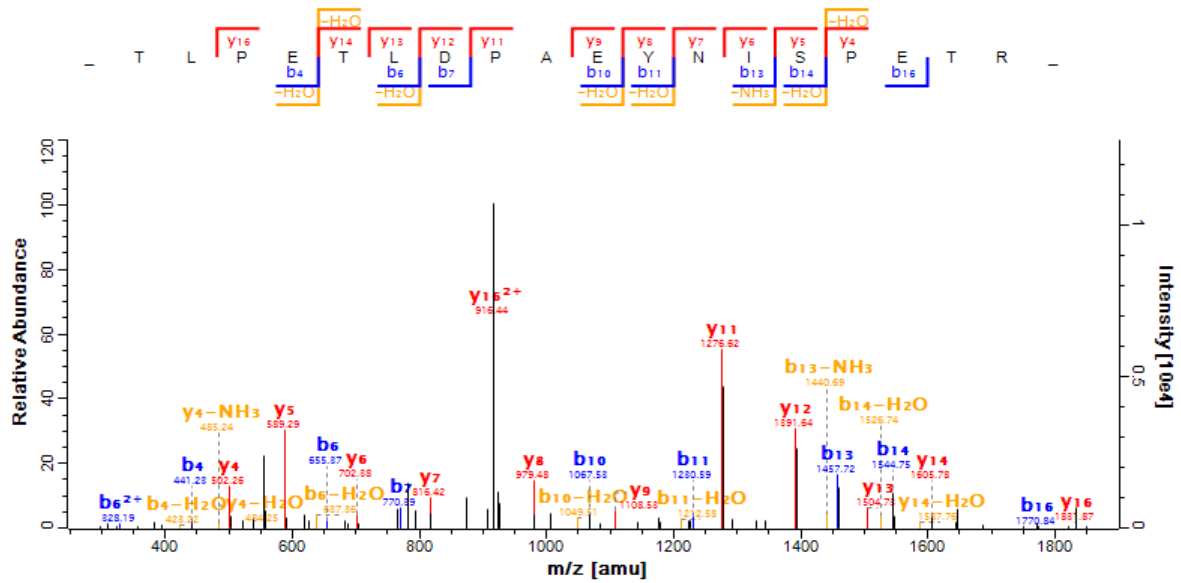

**Protein Group ID:** 569  
**Protein Accession Numbers:** O75817; C9JYM0  
**Gene Names:** POP7  
**Peptide Sequence:** GAVEALDPVEYTLR  
**Total Number of Spectra:** 1  
**Number of Replicates (out of 8):** 1  
**Best Match Score:** 119.45  
**Best Match Posterior Error Probability:** 0.00025611  
**Best Match Spectrum:**

**Scan number** 55508      **Raw file** A549-US-Mock-top20CID-Elite-2ug-B11  
**Method** ITMS; CID      **Genenames** POP7

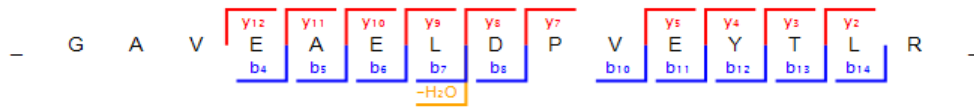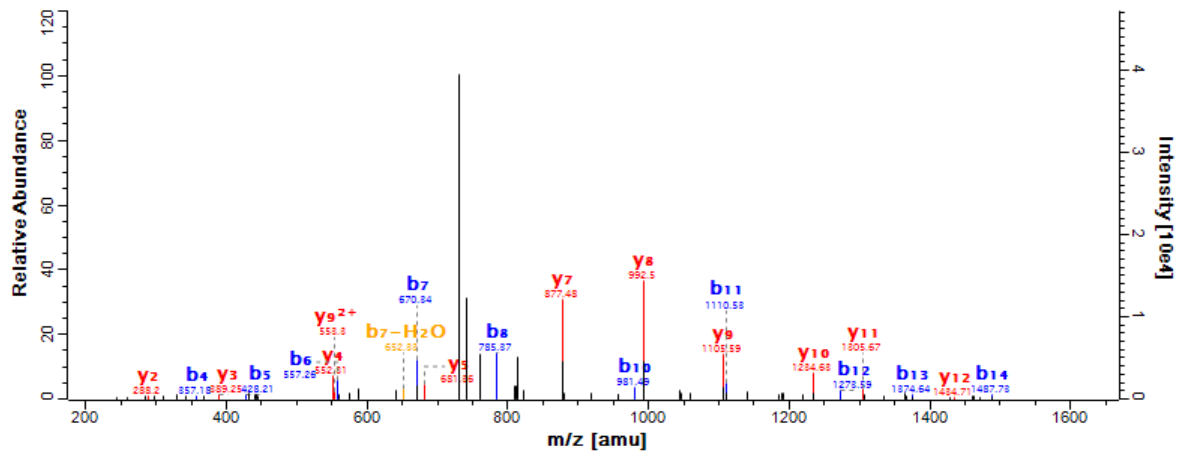



**Protein Group ID:** 571

**Protein Accession Numbers:** Q96ET8; C9JYS5; Q9NYZ1; J3KS67; Q96ET8-3; Q96ET8-2; E5RGC5; I3L376; E5RIS5

**Gene Names:** FAM18B2;FAM18B1

**Peptide Sequence:** MLQQDSNDDTVDVSLFDEEETTRPR

**Total Number of Spectra:** 6

**Number of Replicates (out of 8):** 4

**Best Match Score:** 110.67

**Best Match Posterior Error Probability:** 3.97E-11

**Best Match Spectrum:**

|                    |           |                  |                                   |
|--------------------|-----------|------------------|-----------------------------------|
| <b>Scan number</b> | 61534     | <b>Raw file</b>  | A549-US-WT-top20CID-Elite-2ug-B12 |
| <b>Method</b>      | ITMS: CID | <b>Genenames</b> | FAM18B2;FAM18B1                   |

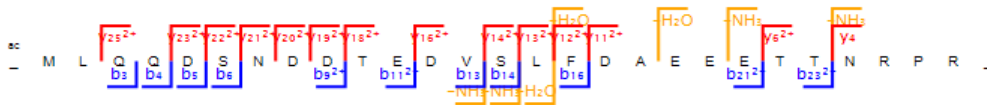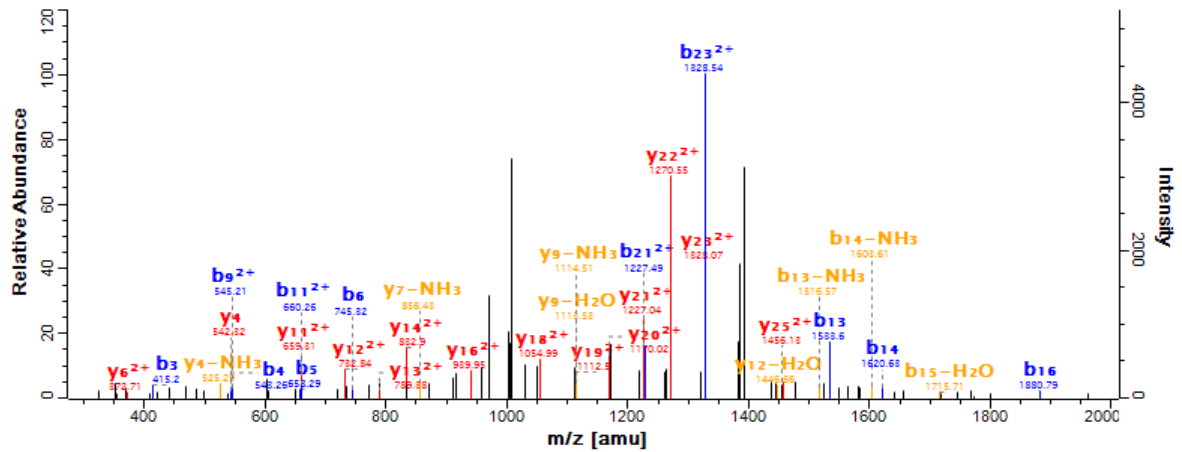

**Protein Group ID:** 573

**Protein Accession Numbers:** Q7Z2E3; Q7Z2E3-7; Q7Z2E3-8; Q7Z2E3-11; Q7Z2E3-10; Q7Z2E3-9; Q7Z2E3-5; Q7Z2E3-3; Q7Z2E3-4; C9JZ40; F8W6G5; Q7Z2E3-2; Q7Z2E3-6

**Gene Names:** APTX

**Peptide Sequence:** YHWLVPTSISLK

**Total Number of Spectra:** 6

**Number of Replicates (out of 8):** 5

**Best Match Score:** 105.65

**Best Match Posterior Error Probability:** 0.00016181

**Best Match Spectrum:**

|                    |           |                  |                                     |
|--------------------|-----------|------------------|-------------------------------------|
| <b>Scan number</b> | 82207     | <b>Raw file</b>  | A549-US-Mock-top20CID-Elite-2ug-B11 |
| <b>Method</b>      | ITMS: CID | <b>Genenames</b> | APTX                                |

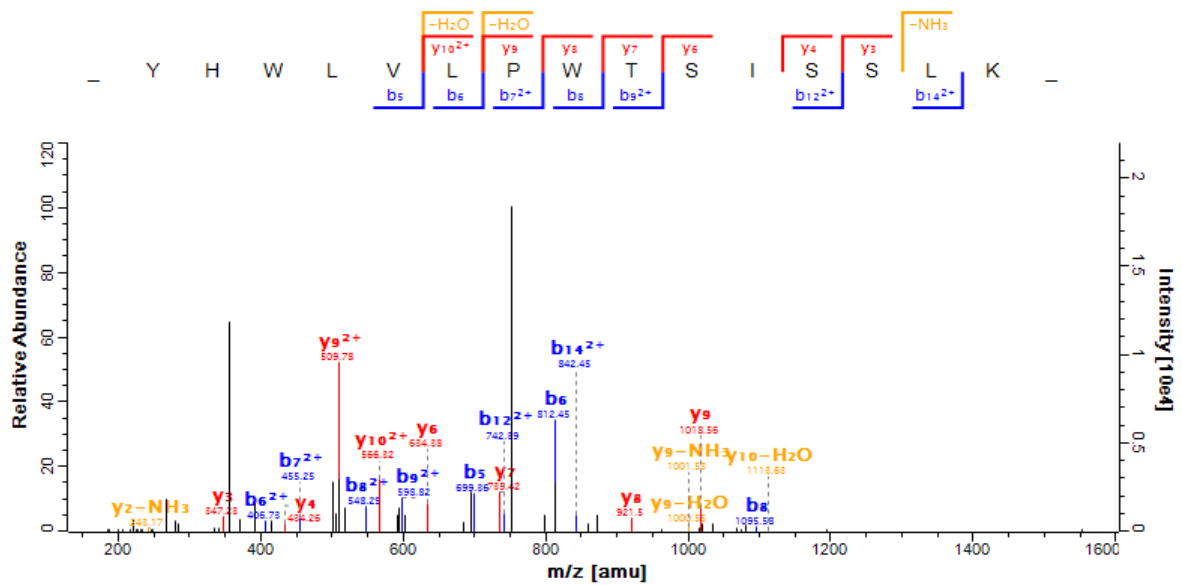

**Protein Group ID:** 579

**Protein Accession Numbers:** J3KR78; Q9H974; Q9H974-3; Q9H974-2; C9K0B6

**Gene Names:** QTRTD1

**Peptide Sequence:** SVIGVIEGGDVMEEER

**Total Number of Spectra:** 1

**Number of Replicates (out of 8):** 1

**Best Match Score:** 120.63

**Best Match Posterior Error Probability:** 8.50E-05

**Best Match Spectrum:**

**Scan number** 58752      **Raw file** A549-US-Mock-top20CID-Elite-2ug-B11  
**Method** ITMS; CID      **Genenames** QTRTD1

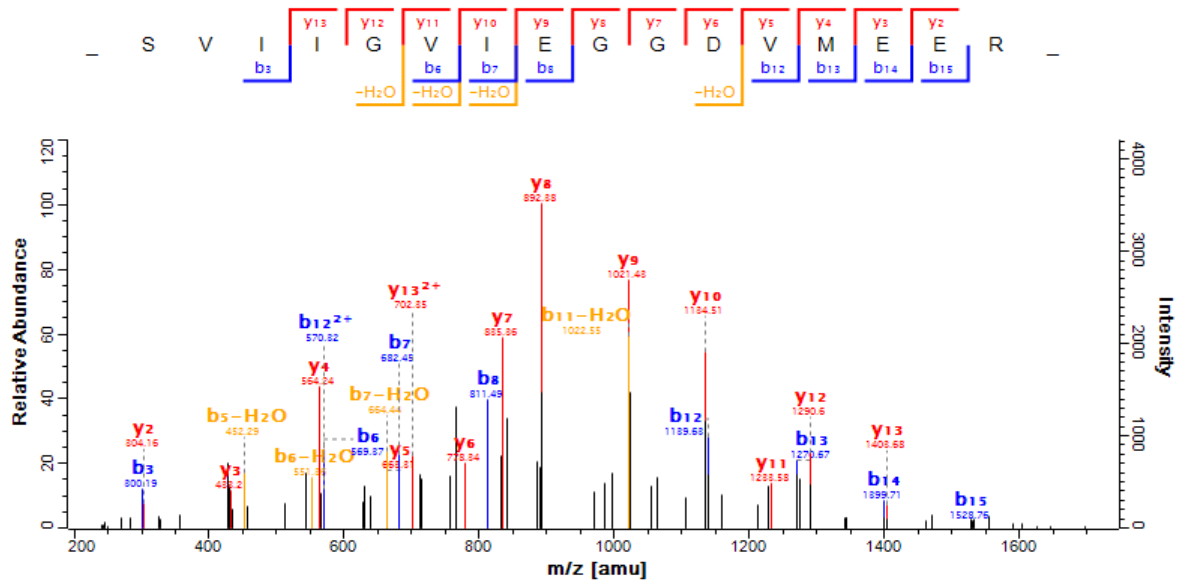

**Protein Group ID:** 581

**Protein Accession Numbers:** CON\_\_A2I7N3

**Gene Names:**

**Peptide Sequence:** FSISSHYQLK

**Total Number of Spectra:** 4

**Number of Replicates (out of 8):** 4

**Best Match Score:** 89.08

**Best Match Posterior Error Probability:** 0.0020971

**Best Match Spectrum:**

**Scan number** 32370      **Raw file** A549-US-Mock-top20CID-Elite-2ug-B12  
**Method** ITMS; CID      **Pepti...** 89.08

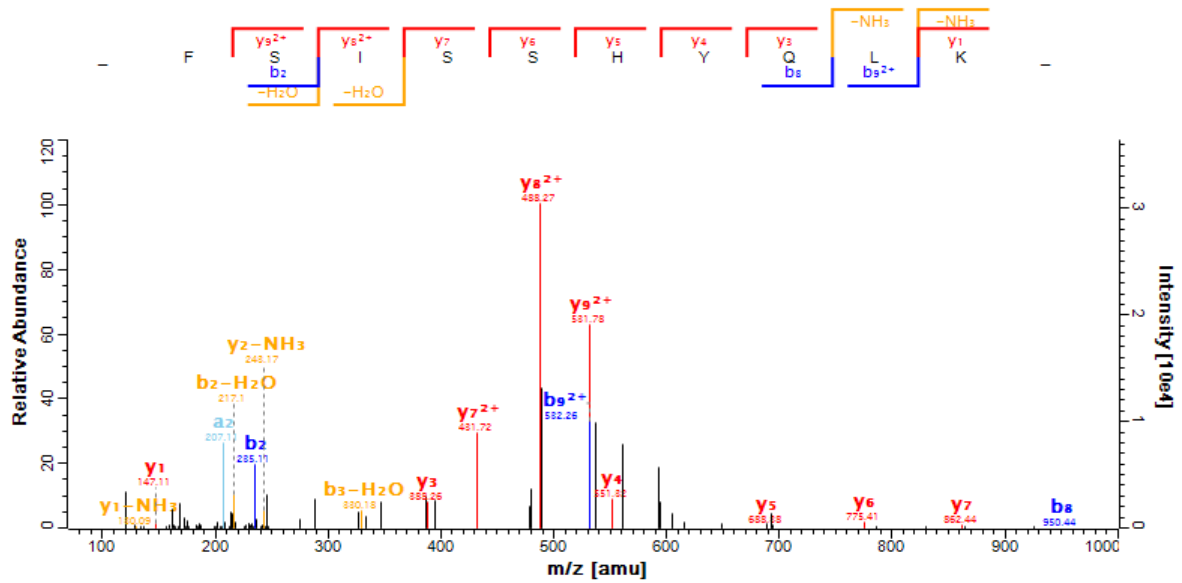

**Protein Group ID:** 582

**Protein Accession Numbers:** CON\_\_ENSEMBL:ENSBTAP00000007350; CON\_\_P01030

**Gene Names:**

**Peptide Sequence:** ALVALGAVDTALYAVGGK

**Total Number of Spectra:** 1

**Number of Replicates (out of 8):** 1

**Best Match Score:** 130.47

**Best Match Posterior Error Probability:** 3.90E-05

**Best Match Spectrum:**

**Scan number** 78122      **Raw file** A549-US-WT-top20CID-Elite-2ug-B13  
**Method** ITMS; CID      **Pepti...** 130.47

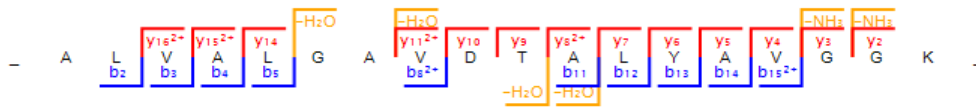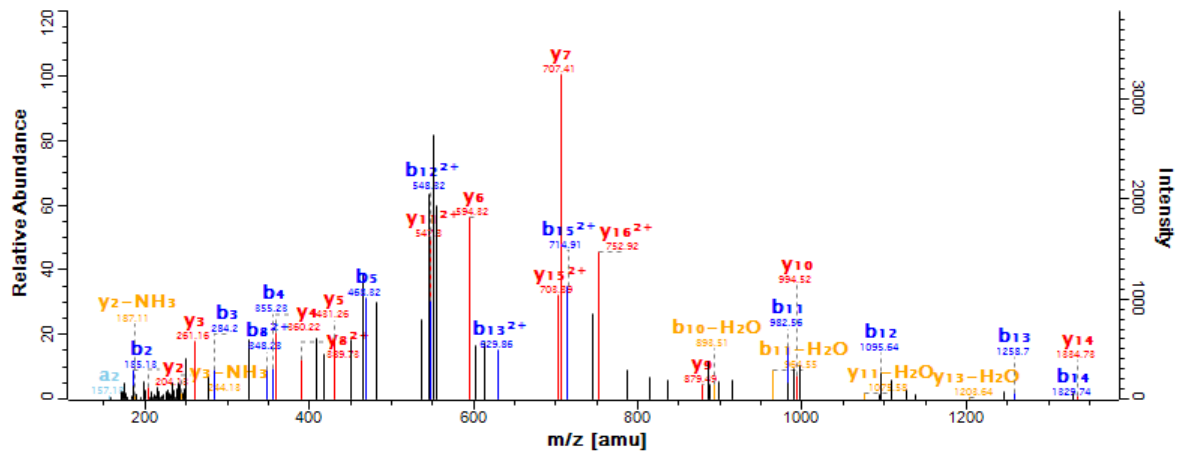

**Protein Group ID:** 587

**Protein Accession Numbers:** CON\_\_ENSEMBL:ENSBTAP00000034412

**Gene Names:**

**Peptide Sequence:** ALCQKPEISNGK

**Total Number of Spectra:** 1

**Number of Replicates (out of 8):** 1

**Best Match Score:** 131.17

**Best Match Posterior Error Probability:** 0.0022658

**Best Match Spectrum:**

**Scan number** 9304      **Raw file** A549-US-WT-top20CID-Elite-2ug-B13  
**Method** ITMS; CID      **Peptide...** 131.17

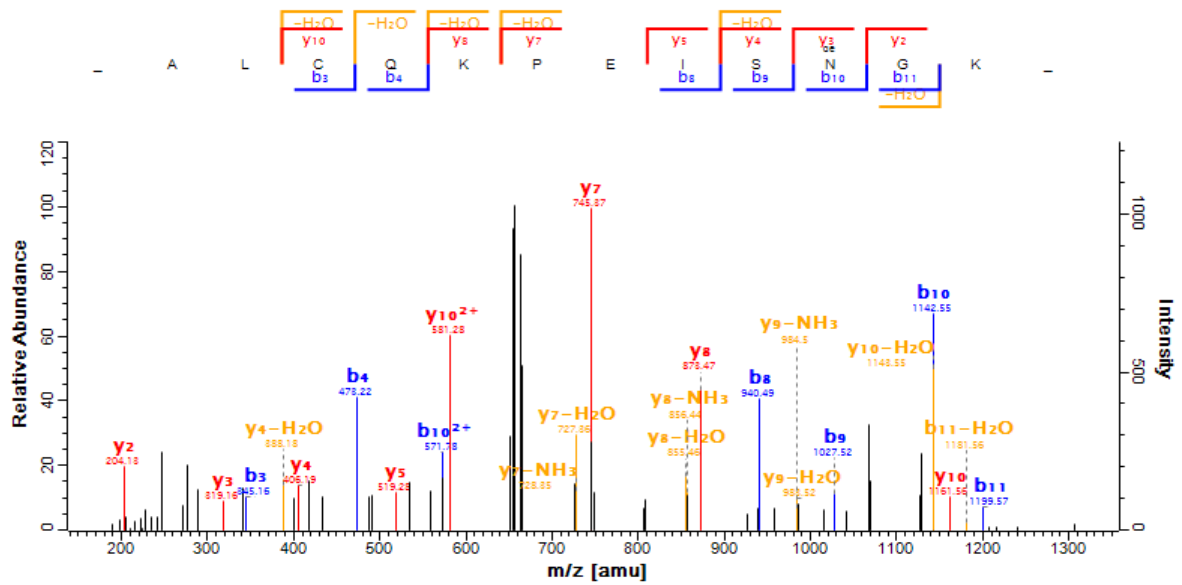

**Protein Group ID:** 588

**Protein Accession Numbers:** CON\_\_ENSEMBL:ENSBTAP00000038329

**Gene Names:**

**Peptide Sequence:** LPENVTPPEEQHK

**Total Number of Spectra:** 1

**Number of Replicates (out of 8):** 1

**Best Match Score:** 100.22

**Best Match Posterior Error Probability:** 0.00050652

**Best Match Spectrum:**

**Scan number** 11939      **Raw file** A549-US-WT-top20CID-Elite-2ug-B13  
**Method** ITMS; CID      **Pepti...** 100.22

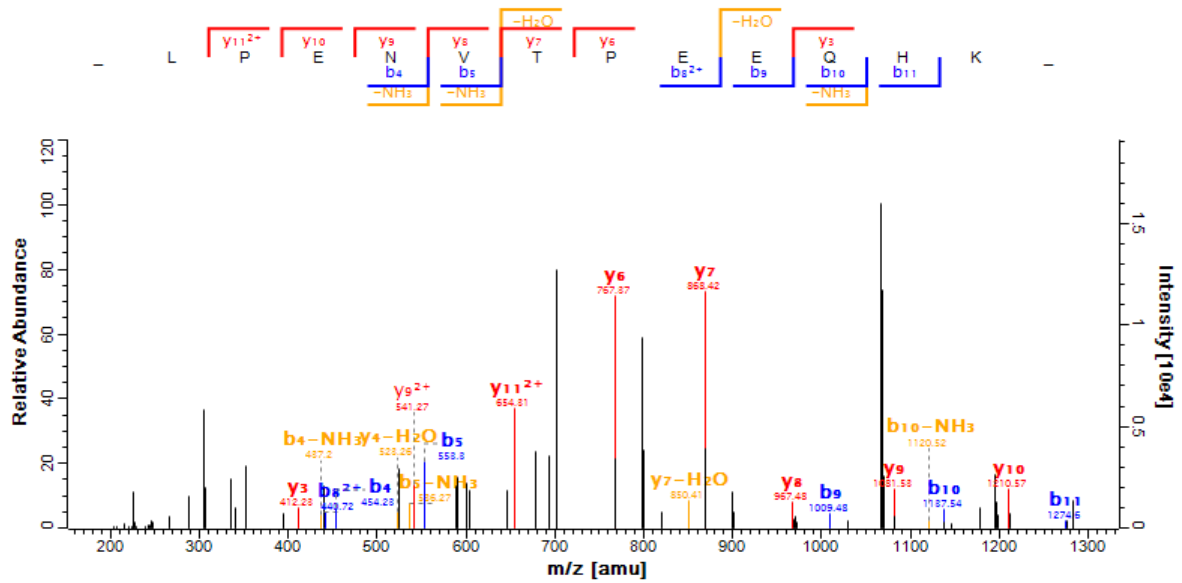

**Protein Group ID:** 589

**Protein Accession Numbers:** CON\_\_H-INV:HIT000292931

**Gene Names:**

**Peptide Sequence:** QLYEKEIRELELQSQISQISDTSVVLSDNSR

**Total Number of Spectra:** 1

**Number of Replicates (out of 8):** 1

**Best Match Score:** 132.36

**Best Match Posterior Error Probability:** 3.01E-15

**Best Match Spectrum:**

**Scan number** 85553      **Raw file** A549-US-WT-top20CID-Elite-2ug-B12  
**Method** ITMS; CID      **Pepti...** 132.36

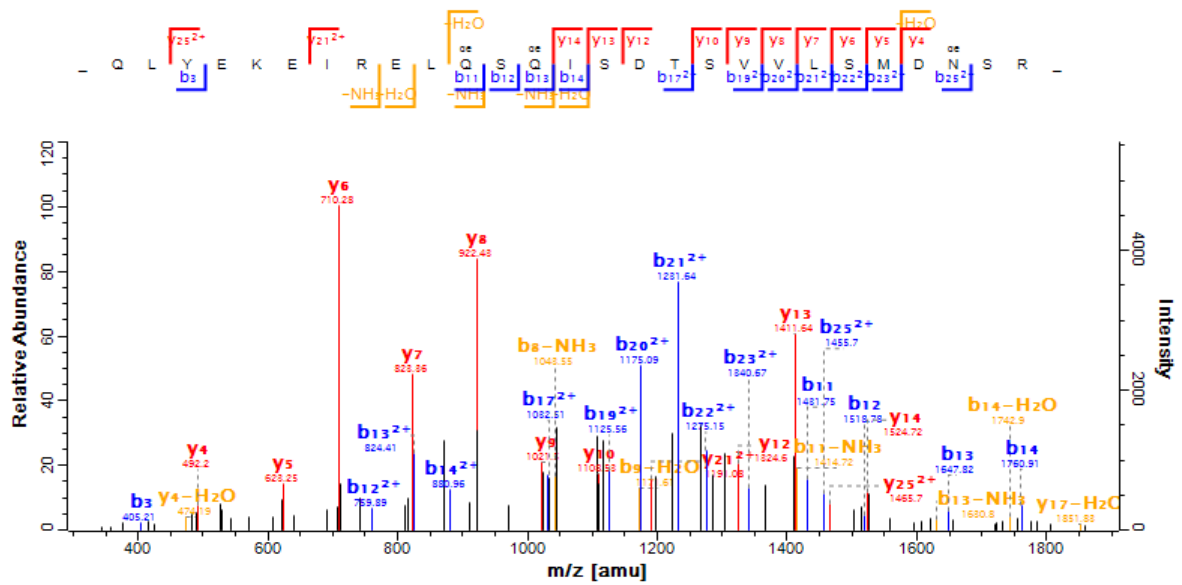



**Protein Group ID:** 595  
**Protein Accession Numbers:** CON\_\_P02584  
**Gene Names:**  
**Peptide Sequence:** T F V N I T P A E V G I L V G K  
**Total Number of Spectra:** 3  
**Number of Replicates (out of 8):** 3  
**Best Match Score:** 99.747  
**Best Match Posterior Error Probability:** 0.00016539  
**Best Match Spectrum:**

**Scan number** 75867      **Raw file** A549-US-Mock-top20CID-Elite-2ug-B13  
**Method** ITMS; CID      **Pepti...** 99.75

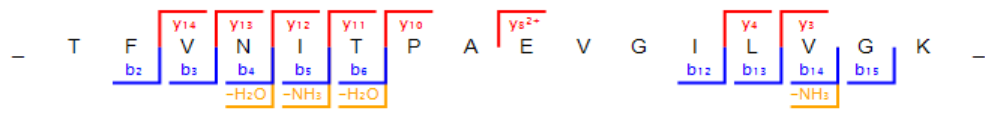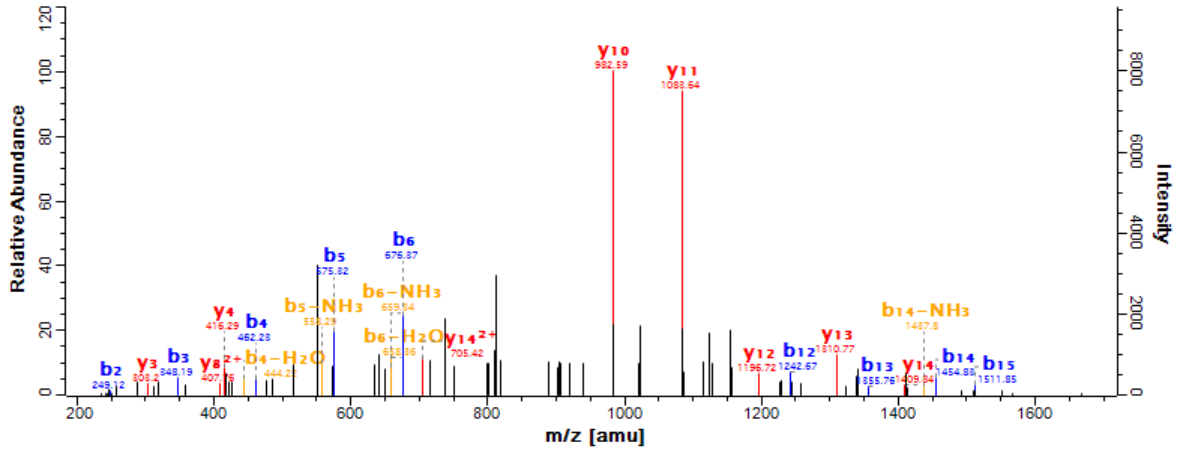

**Protein Group ID:** 599

**Protein Accession Numbers:** CON\_\_P04259; CON\_\_P48668; P48668; P04259

**Gene Names:** KRT6C;KRT6B

**Peptide Sequence:** SGFSSISVSR

**Total Number of Spectra:** 1

**Number of Replicates (out of 8):** 1

**Best Match Score:** 100.69

**Best Match Posterior Error Probability:** 0.00051002

**Best Match Spectrum:**

**Scan number** 26164      **Raw file** A549-US-WT-top20CID-Elite-2ug-B12  
**Method** ITMS; CID      **Genenames** KRT6C;KRT6B

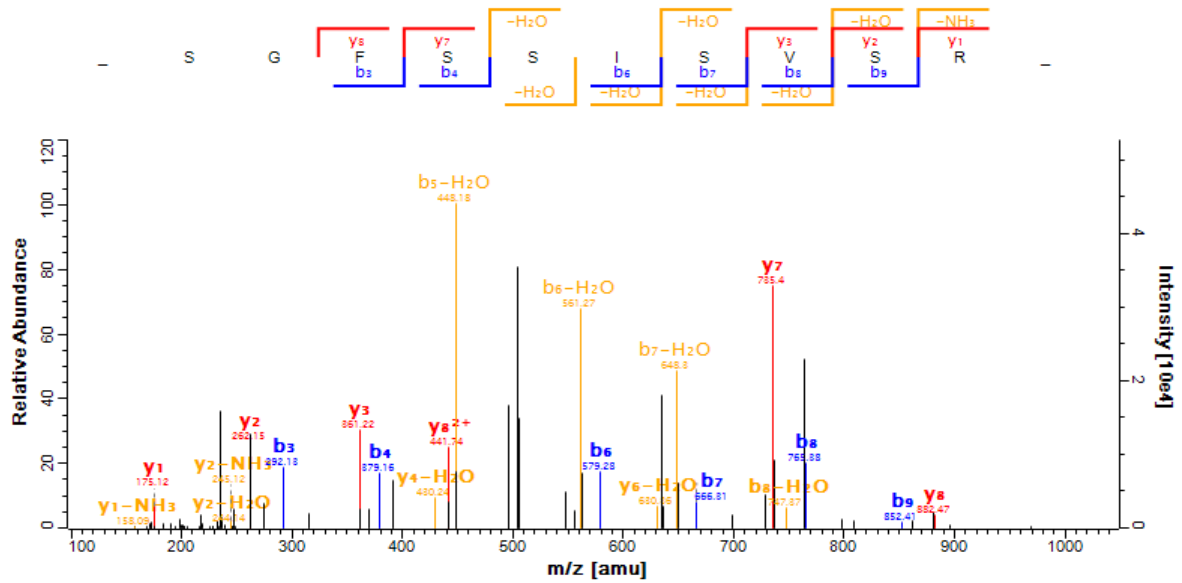

**Protein Group ID:** 603

**Protein Accession Numbers:** E7EQ64; CON\_\_P07477; P07477; H0Y8D1

**Gene Names:** PRSS1

**Peptide Sequence:** TLNNDIMLIK

**Total Number of Spectra:** 10

**Number of Replicates (out of 8):** 7

**Best Match Score:** 179.57

**Best Match Posterior Error Probability:** 5.46E-07

**Best Match Spectrum:**

**Scan number** 47582      **Raw file** A549-US-WT-top20CID-Elite-2ug-B14  
**Method** ITMS; CID      **Genenames** PRSS1

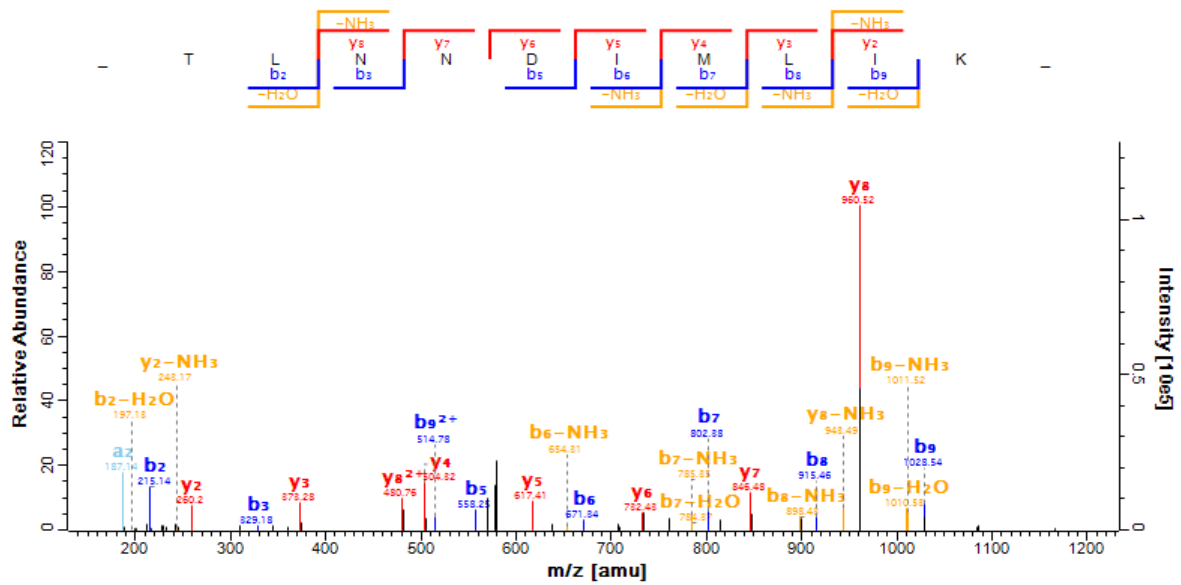

**Protein Group ID:** 604  
**Protein Accession Numbers:** CON\_\_P07744  
**Gene Names:**  
**Peptide Sequence:** AQYEDIAR  
**Total Number of Spectra:** 2  
**Number of Replicates (out of 8):** 2  
**Best Match Score:** 141.2  
**Best Match Posterior Error Probability:** 0.0025953  
**Best Match Spectrum:**

**Scan number** 14389      **Raw file** A549-US-Mock-top20CID-Elite-2ug-B13  
**Method** ITMS; CID      **Pepti...** 141.2

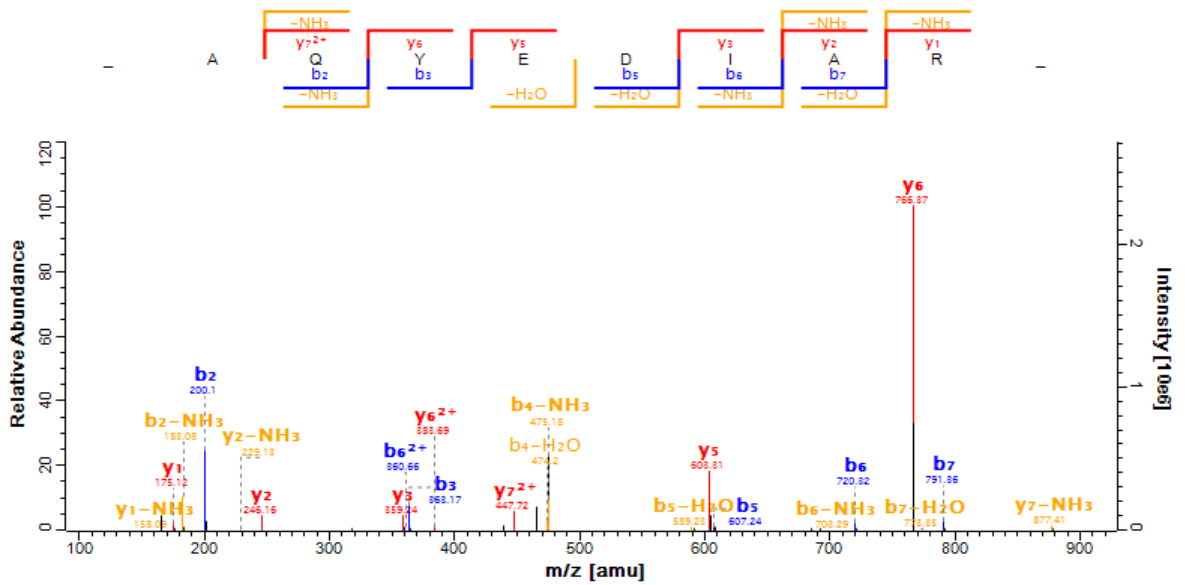

**Protein Group ID:** 613  
**Protein Accession Numbers:** CON\_\_P28800  
**Gene Names:**  
**Peptide Sequence:** LDNQEPGGQIAPK  
**Total Number of Spectra:** 5  
**Number of Replicates (out of 8):** 5  
**Best Match Score:** 90.793  
**Best Match Posterior Error Probability:** 0.0013227  
**Best Match Spectrum:**

**Scan number** 14466      **Raw file** A549-US-WT-top20CID-Elite-2ug-B13  
**Method** ITMS; CID      **Pepti...** 90.79

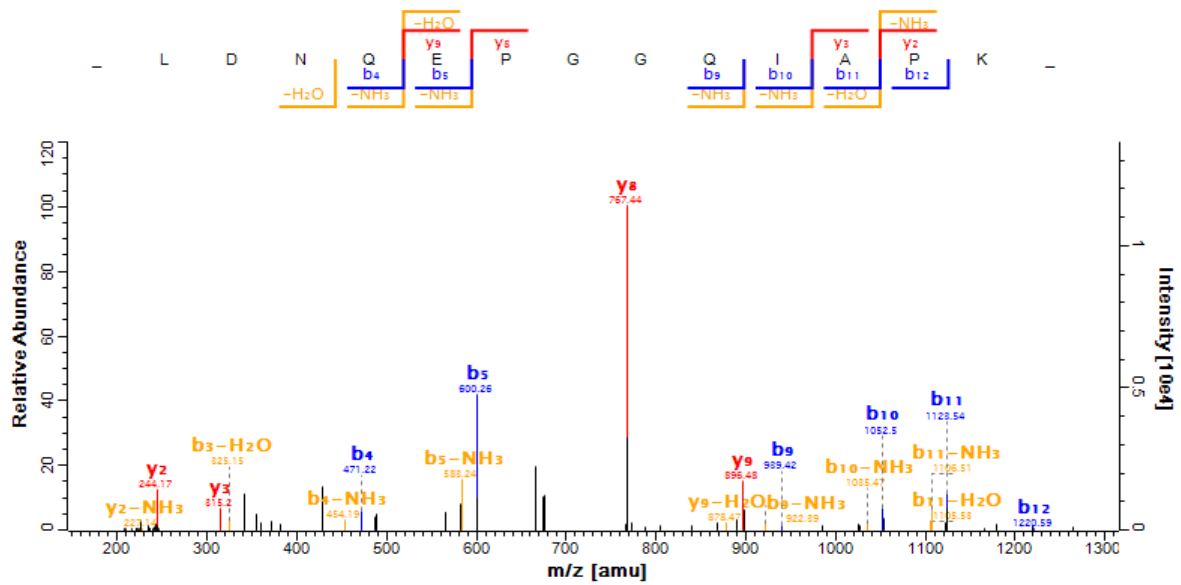

**Protein Group ID:** 616

**Protein Accession Numbers:** CON\_\_P35908

**Gene Names:**

**Peptide Sequence:** GGGFGGGSGFGGGSGFGGGSGFSGGGFGGGGFGGGR

**Total Number of Spectra:** 2

**Number of Replicates (out of 8):** 2

**Best Match Score:** 70.701

**Best Match Posterior Error Probability:** 3.79E-07

**Best Match Spectrum:**

**Scan number** 62840      **Raw file** A549-US-Mock-top20CID-Elite-2ug-B14  
**Method** ITMS; CID      **Pepti...** 70.7

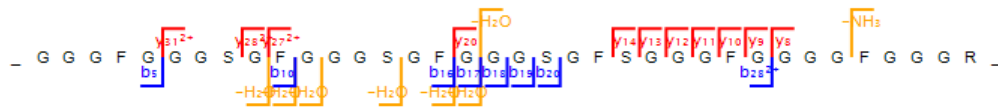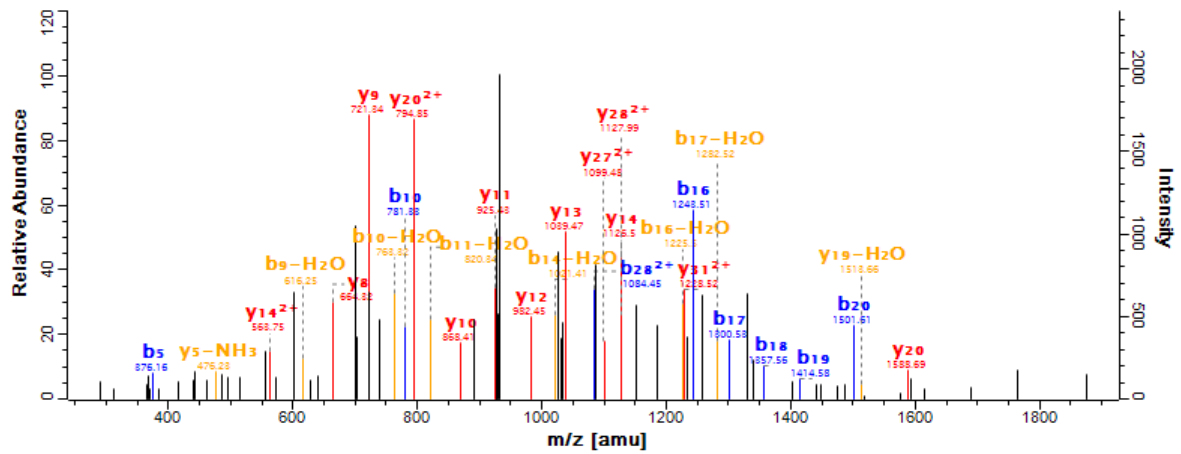

**Protein Group ID:** 618

**Protein Accession Numbers:** CON\_\_P60712; P60709; E7EVS6; G5E9R0; C9JZR7; C9JTX5

**Gene Names:** ACTB

**Peptide Sequence:** DDDIAALVVDNNGSGMCK

**Total Number of Spectra:** 65

**Number of Replicates (out of 8):** 8

**Best Match Score:** 239.58

**Best Match Posterior Error Probability:** 1.41E-80

**Best Match Spectrum:**

**Scan number** 66196      **Raw file** A549-US-WT-top20CID-Elite-2ug-B13  
**Method** ITMS: CID      **Genenames** ACTB

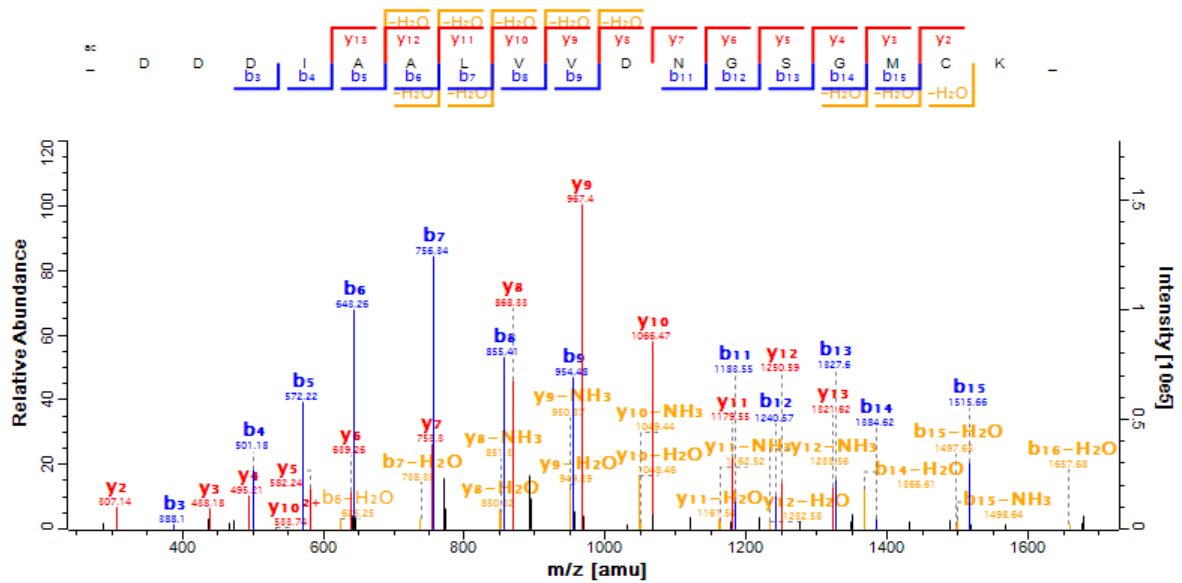

**Protein Group ID:** 619  
**Protein Accession Numbers:** CON\_\_P81644  
**Gene Names:**  
**Peptide Sequence:** AGTDLLNFLSSFIDPK  
**Total Number of Spectra:** 9  
**Number of Replicates (out of 8):** 8  
**Best Match Score:** 227.67  
**Best Match Posterior Error Probability:** 2.37E-63  
**Best Match Spectrum:**

**Scan number** 96790      **Raw file** A549-US-WT-top20CID-Elite-2ug-B11  
**Method** ITMS; CID      **Pepti...** 227.67

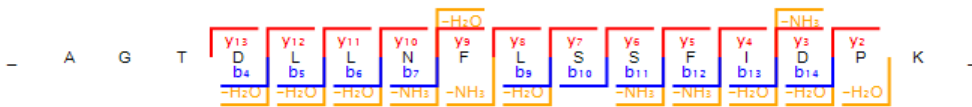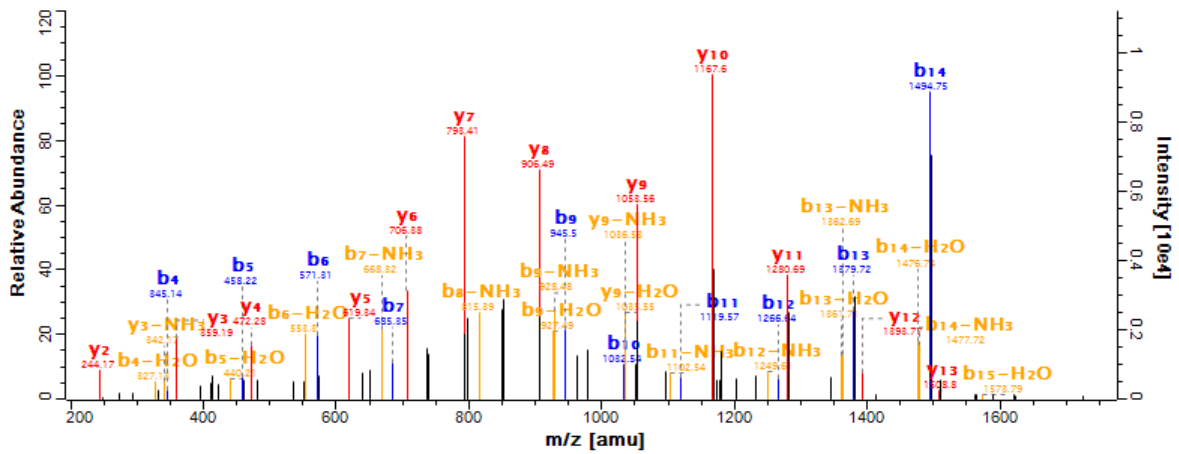



**Protein Group ID:** 620

**Protein Accession Numbers:** CON\_Q04695; Q04695; CON\_Q9QWL7; K7EPJ9;  
CON\_Q99PS0; CON\_Q9C075; Q9C075; J3QR55

**Gene Names:** KRT17;KRT23

**Peptide Sequence:** ATMQNLNDR

**Total Number of Spectra:** 2

**Number of Replicates (out of 8):** 2

**Best Match Score:** 99.973

**Best Match Posterior Error Probability:** 0.001775

**Best Match Spectrum:**

|                    |           |                  |                                   |
|--------------------|-----------|------------------|-----------------------------------|
| <b>Scan number</b> | 7549      | <b>Raw file</b>  | A549-US-WT-top20CID-Elite-2ug-B11 |
| <b>Method</b>      | ITMS: CID | <b>Genenames</b> | KRT17;KRT23                       |

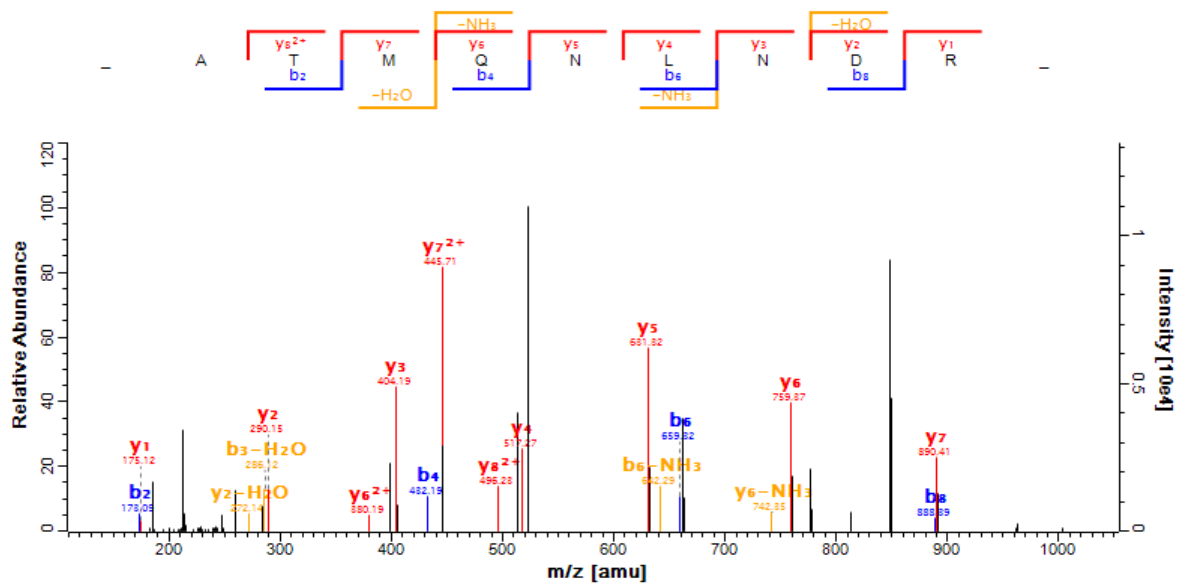

**Protein Group ID:** 624  
**Protein Accession Numbers:** CON\_Q1RMN8  
**Gene Names:**  
**Peptide Sequence:** ATLVCLISDFYPGSVTVVWK  
**Total Number of Spectra:** 1  
**Number of Replicates (out of 8):** 1  
**Best Match Score:** 73.498  
**Best Match Posterior Error Probability:** 0.0012031  
**Best Match Spectrum:**

**Scan number** 92794      **Raw file** A549-US-WT-top20CID-Elite-2ug-B13  
**Method** ITMS; CID      **Pepti...** 73.5

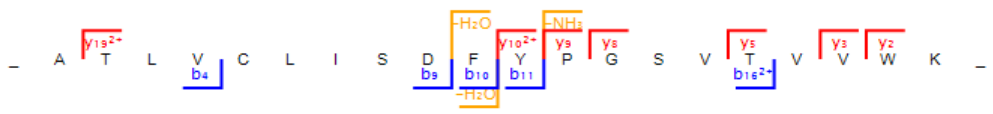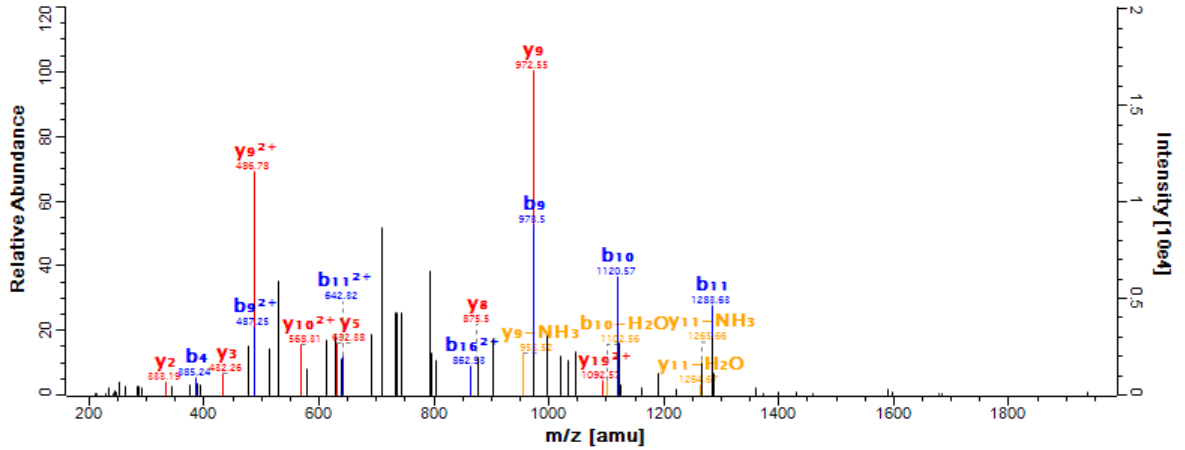

**Protein Group ID:** 625  
**Protein Accession Numbers:** CON\_\_Q2KIS7  
**Gene Names:**  
**Peptide Sequence:** TQLDSLAEVALLK  
**Total Number of Spectra:** 1  
**Number of Replicates (out of 8):** 1  
**Best Match Score:** 167.69  
**Best Match Posterior Error Probability:** 1.61E-10  
**Best Match Spectrum:**

**Scan number** 71050      **Raw file** A549-US-WT-top20CID-Elite-2ug-B13  
**Method** ITMS; CID      **Pepti...** 167.69

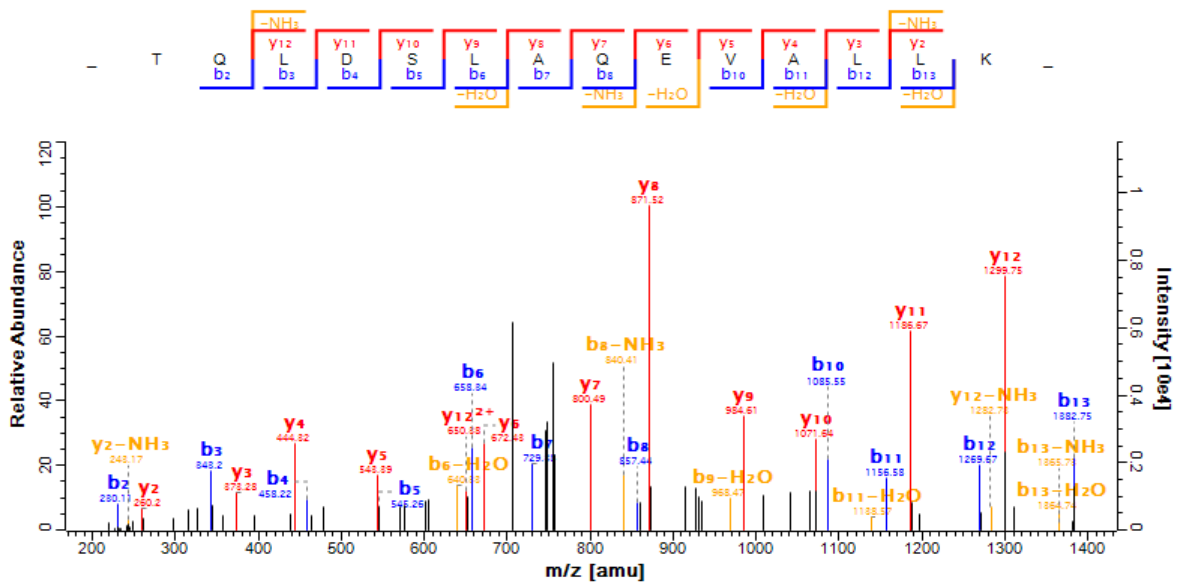

**Protein Group ID:** 628

**Protein Accession Numbers:** CON\_Q2YDI2; O43929; F5H069; O43929-2; Q53SE3

**Gene Names:** ORC4;ORC4L

**Peptide Sequence:** VFGSFAENLSFLLEALK

**Total Number of Spectra:** 2

**Number of Replicates (out of 8):** 2

**Best Match Score:** 137.45

**Best Match Posterior Error Probability:** 1.02E-08

**Best Match Spectrum:**

|                    |           |                  |                                   |
|--------------------|-----------|------------------|-----------------------------------|
| <b>Scan number</b> | 95495     | <b>Raw file</b>  | A549-US-WT-top20CID-Elite-2ug-B14 |
| <b>Method</b>      | ITMS; CID | <b>Genenames</b> | ORC4;ORC4L                        |

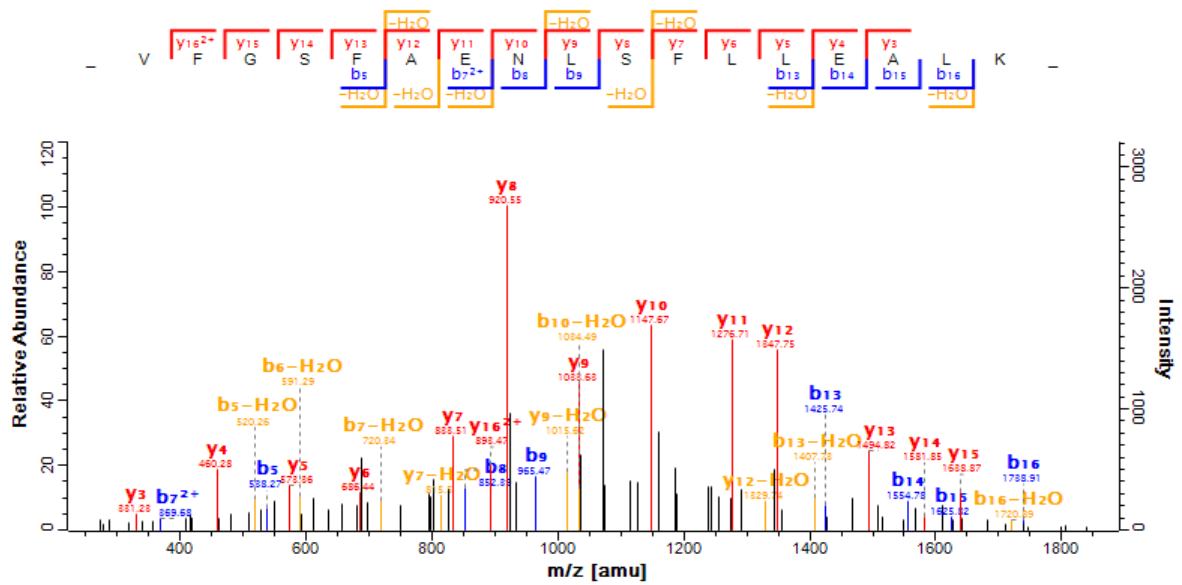

**Protein Group ID:** 630  
**Protein Accession Numbers:** CON\_Q3KUS7  
**Gene Names:**  
**Peptide Sequence:** YGLVTYATEPK  
**Total Number of Spectra:** 3  
**Number of Replicates (out of 8):** 3  
**Best Match Score:** 141.08  
**Best Match Posterior Error Probability:** 2.15E-05  
**Best Match Spectrum:**

**Scan number** 34019      **Raw file** A549-US-WT-top20CID-Elite-2ug-B13  
**Method** ITMS; CID      **Pepti...** 141.08

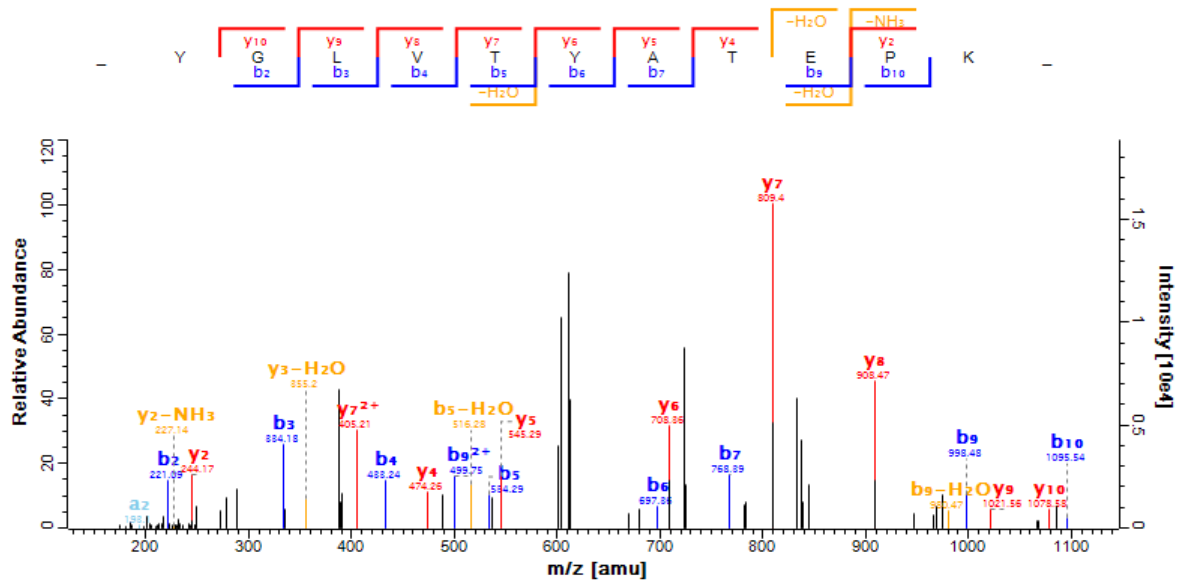

**Protein Group ID:** 633  
**Protein Accession Numbers:** CON\_Q3SX28  
**Gene Names:**  
**Peptide Sequence:** TIDDLEDEVYAQK  
**Total Number of Spectra:** 2  
**Number of Replicates (out of 8):** 2  
**Best Match Score:** 112.44  
**Best Match Posterior Error Probability:** 0.00027861  
**Best Match Spectrum:**

**Scan number** 42603      **Raw file** A549-US-Mock-top20CID-Elite-2ug-B14  
**Method** ITMS; CID      **Pepti...** 112.44

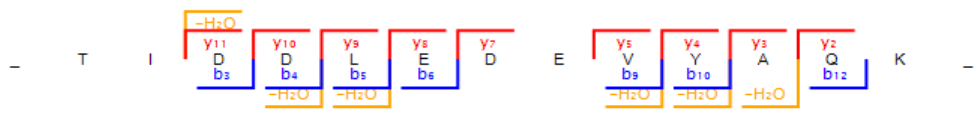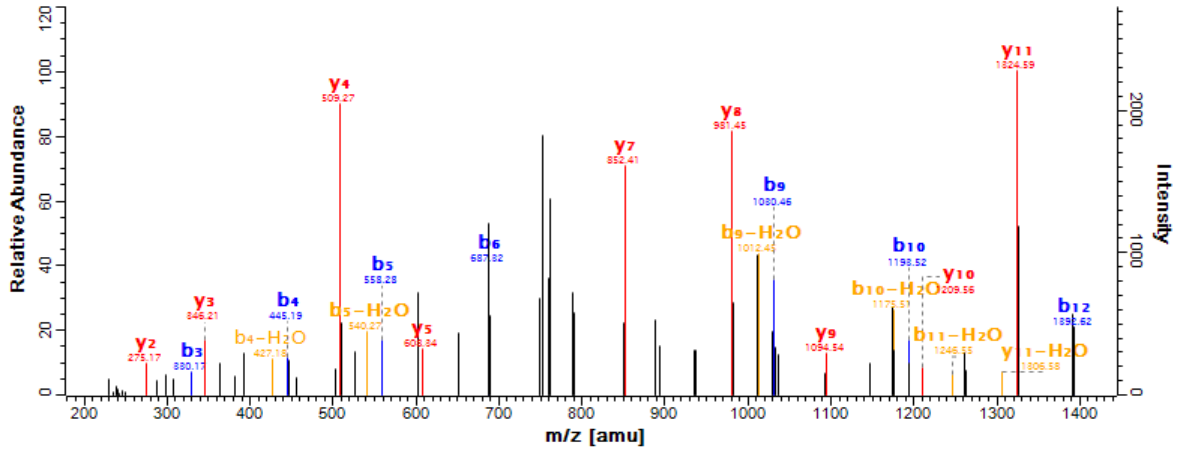

**Protein Group ID:** 639

**Protein Accession Numbers:** CON\_Q3ZBD7

**Gene Names:**

**Peptide Sequence:** KIEPELDGSSSPVTSHDSSSTNGLINFIK

**Total Number of Spectra:** 1

**Number of Replicates (out of 8):** 1

**Best Match Score:** 50.029

**Best Match Posterior Error Probability:** 0.012666

**Best Match Spectrum:**

**Scan number** 58997      **Raw file** A549-US-Mock-top20CID-Elite-2ug-B14  
**Method** ITMS; CID      **Pepti...** 50.03

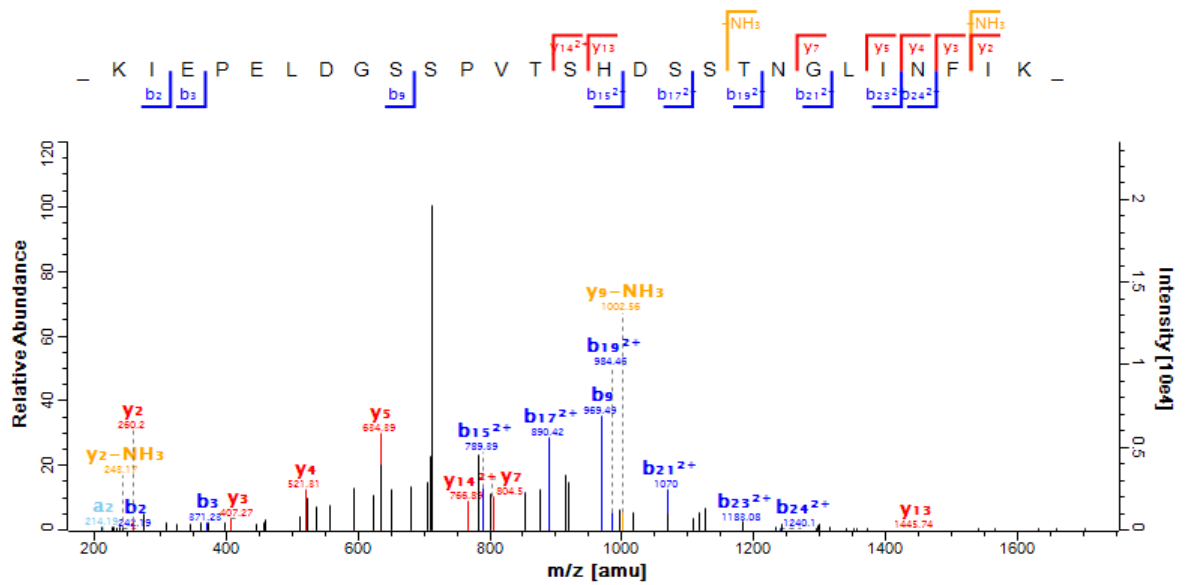

**Protein Group ID:** 643  
**Protein Accession Numbers:** CON\_Q6IFZ6  
**Gene Names:**  
**Peptide Sequence:** WELLQQVNTSTR  
**Total Number of Spectra:** 8  
**Number of Replicates (out of 8):** 8  
**Best Match Score:** 192.65  
**Best Match Posterior Error Probability:** 1.40E-17  
**Best Match Spectrum:**

**Scan number** 52094      **Raw file** A549-US-WT-top20CID-Elite-2ug-B14  
**Method** ITMS; CID      **Pepti...** 192.65

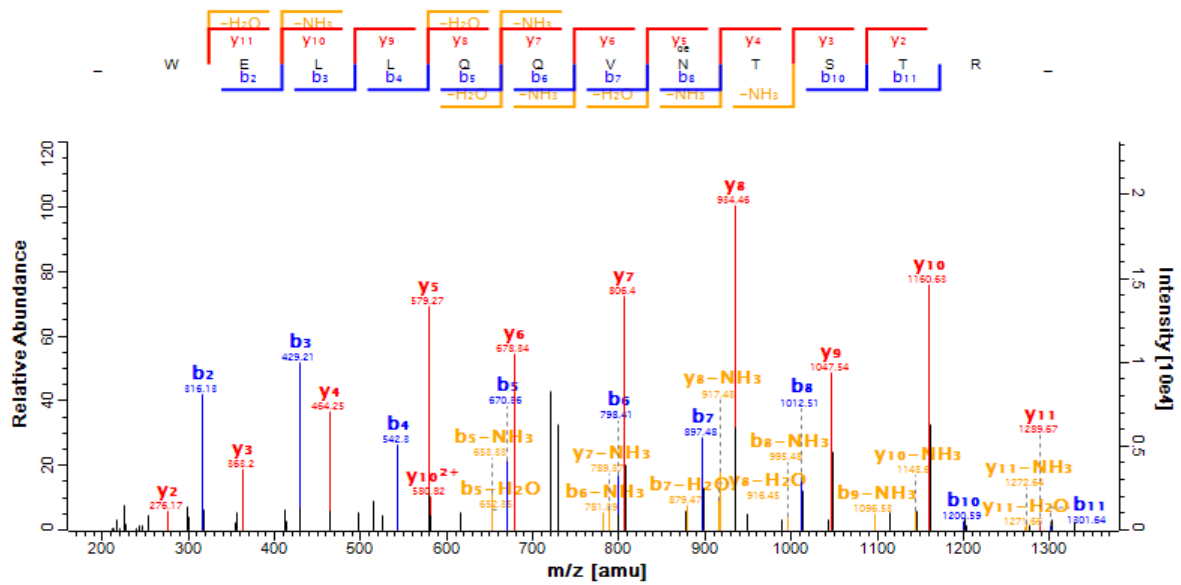



**Protein Group ID:** 644

**Protein Accession Numbers:** CON\_Q7Z794; Q7Z794; F5GY66

**Gene Names:** KRT77

**Peptide Sequence:** YQELQITAGR

**Total Number of Spectra:** 3

**Number of Replicates (out of 8):** 3

**Best Match Score:** 144.1

**Best Match Posterior Error Probability:** 0.0012543

**Best Match Spectrum:**

**Scan number** 29112      **Raw file** A549-US-Mock-top20CID-Elite-2ug-B14  
**Method** ITMS; CID      **Genenames** KRT77

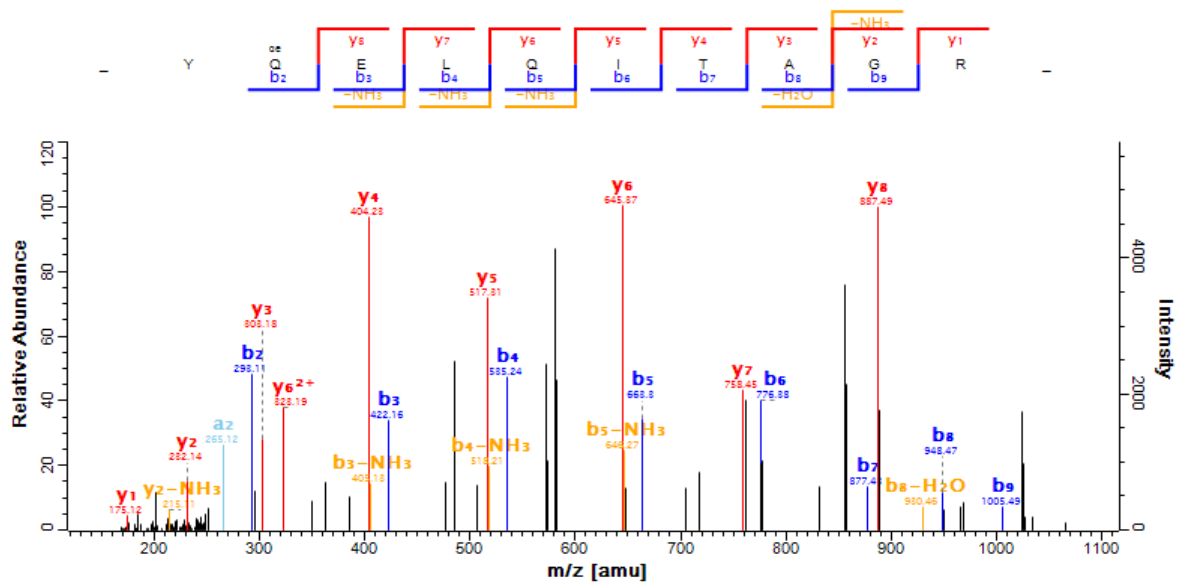

**Protein Group ID:** 646  
**Protein Accession Numbers:** CON\_Q8VED5  
**Gene Names:**  
**Peptide Sequence:** YEELQVTAGK  
**Total Number of Spectra:** 3  
**Number of Replicates (out of 8):** 3  
**Best Match Score:** 107.03  
**Best Match Posterior Error Probability:** 0.0004732  
**Best Match Spectrum:**

**Scan number** 28866      **Raw file** A549-US-Mock-top20CID-Elite-2ug-B14  
**Method** ITMS; CID      **Pepti...** 107.03

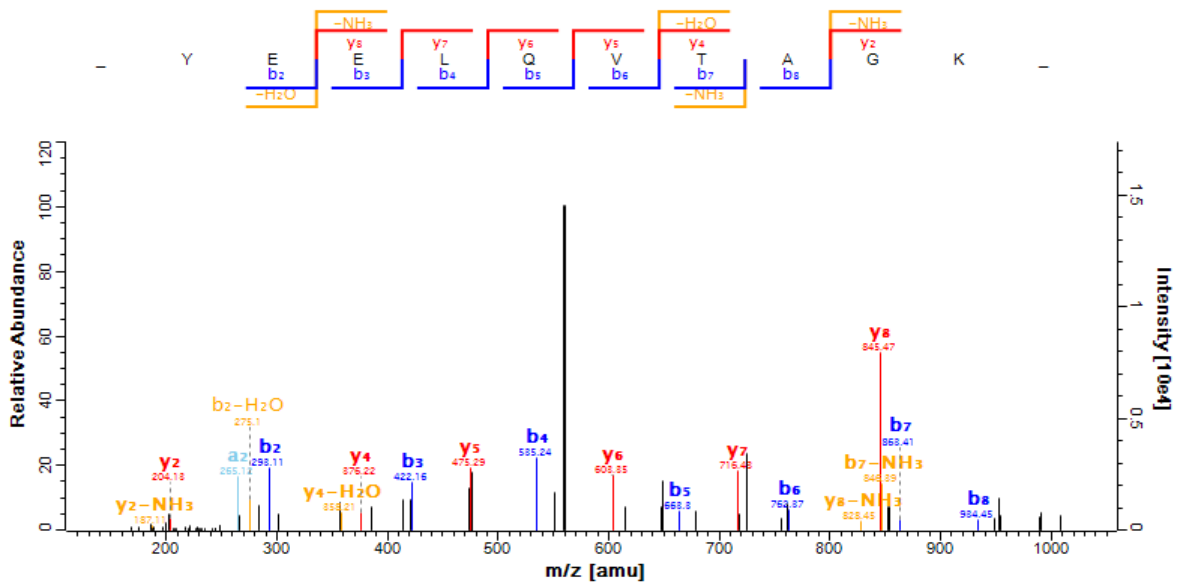

**Protein Group ID:** 647

**Protein Accession Numbers:** CON\_Q95121

**Gene Names:**

**Peptide Sequence:** SGESPTANVLLSPLSVATALSLGAEQR

**Total Number of Spectra:** 6

**Number of Replicates (out of 8):** 4

**Best Match Score:** 71.882

**Best Match Posterior Error Probability:** 2.53E-05

**Best Match Spectrum:**

|                    |           |                 |                                   |
|--------------------|-----------|-----------------|-----------------------------------|
| <b>Scan number</b> | 95647     | <b>Raw file</b> | A549-US-WT-top20CID-Elite-2ug-B13 |
| <b>Method</b>      | ITMS; CID | <b>Pepti...</b> | 71.88                             |

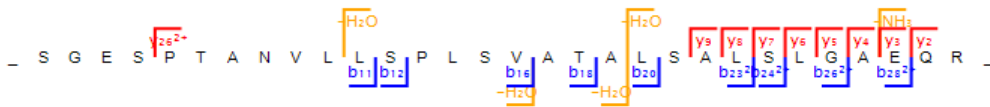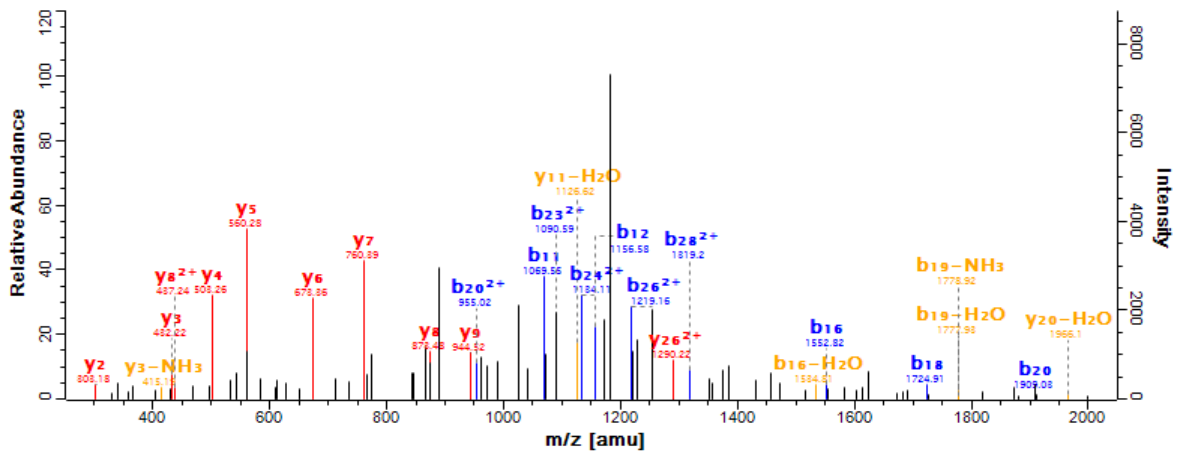

**Protein Group ID:** 650

**Protein Accession Numbers:** CON\_REFSEQ:XP\_001252647

**Gene Names:**

**Peptide Sequence:** IFTSDADFSGITNDHK

**Total Number of Spectra:** 5

**Number of Replicates (out of 8):** 4

**Best Match Score:** 181.58

**Best Match Posterior Error Probability:** 1.21E-19

**Best Match Spectrum:**

**Scan number** 42159      **Raw file** A549-US-Mock-top20CID-Elite-2ug-B14  
**Method** ITMS; CID      **Pepti...** 181.58

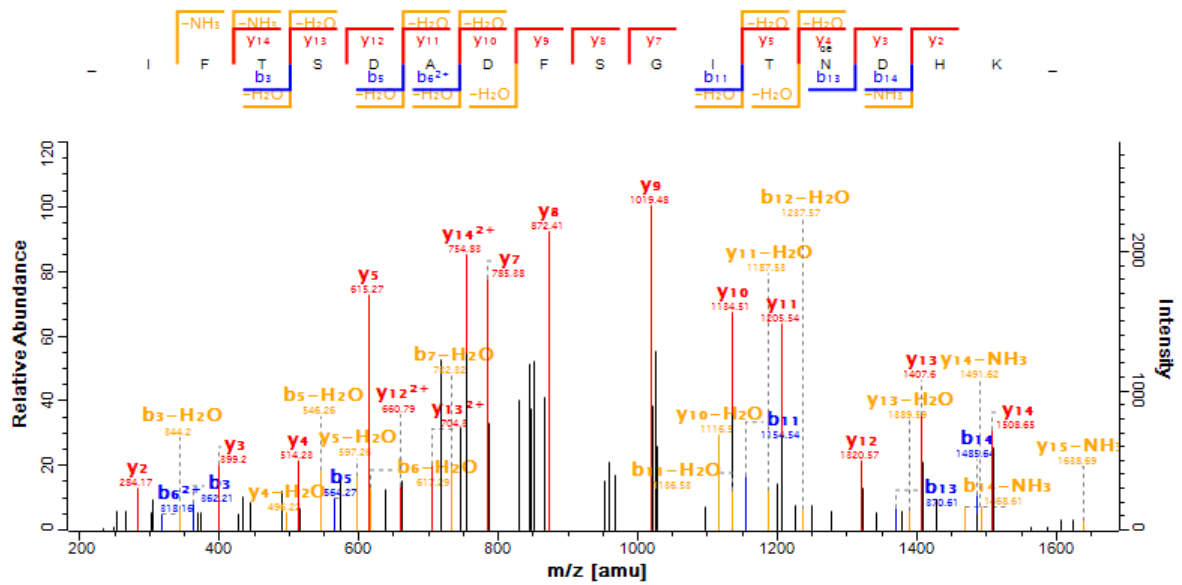

**Protein Group ID:** 652

**Protein Accession Numbers:** D2X2H5; Q8N2Q7; Q8N2Q7-2

**Gene Names:** nlg1;NLGN1

**Peptide Sequence:** KNSVPVTSAFPTAK

**Total Number of Spectra:** 1

**Number of Replicates (out of 8):** 1

**Best Match Score:** 97.463

**Best Match Posterior Error Probability:** 0.0011377

**Best Match Spectrum:**

|                    |           |                  |                                     |
|--------------------|-----------|------------------|-------------------------------------|
| <b>Scan number</b> | 43836     | <b>Raw file</b>  | A549-US-Mock-top20CID-Elite-2ug-B14 |
| <b>Method</b>      | ITMS; CID | <b>Genenames</b> | nlg1;NLGN1                          |

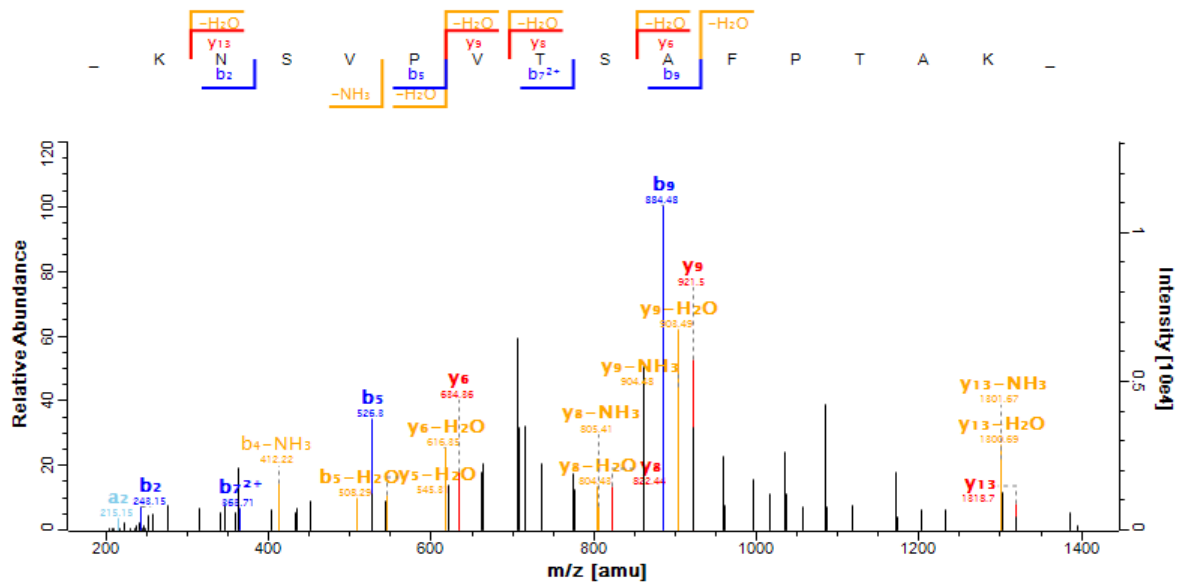

**Protein Group ID:** 653  
**Protein Accession Numbers:** Q8IVL5; D3DNV8  
**Gene Names:** LEPREL1  
**Peptide Sequence:** SAAEGLGFSYTEPNIYR  
**Total Number of Spectra:** 5  
**Number of Replicates (out of 8):** 5  
**Best Match Score:** 180.64  
**Best Match Posterior Error Probability:** 3.42E-21  
**Best Match Spectrum:**

**Scan number** 69996      **Raw file** A549-US-WT-top20CID-Elite-2ug-B11  
**Method** ITMS; CID      **Genenames** LEPREL1

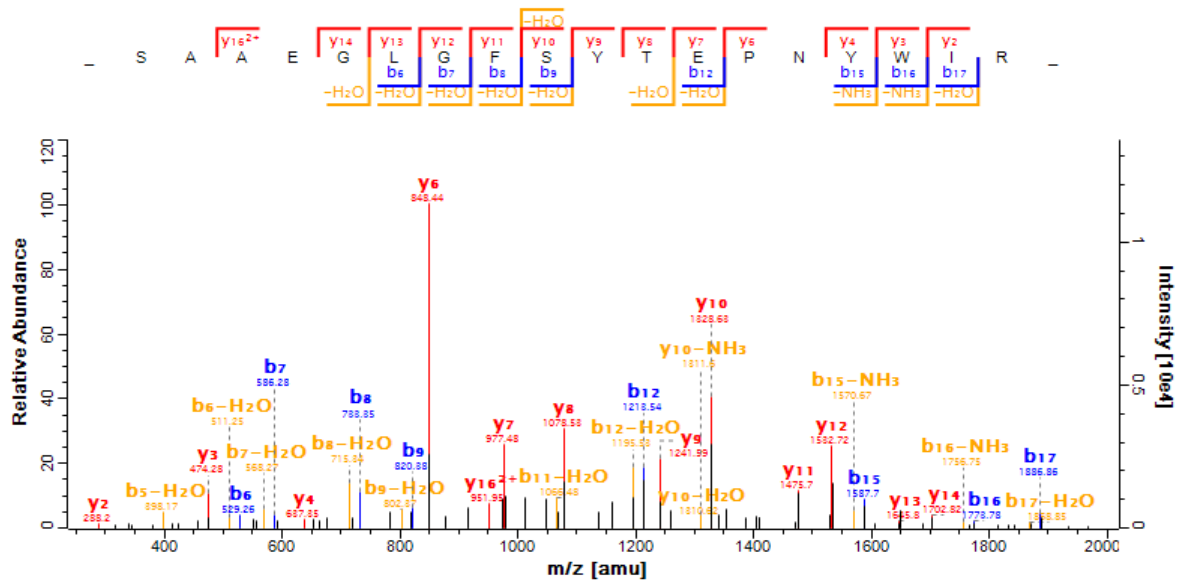

**Protein Group ID:** 662

**Protein Accession Numbers:** D3YTE6; H0YN69; Q6PKH6-2; Q6PKH6; E9PFL3; F5H660; Q6E0Y0

**Gene Names:** DHRS4L2

**Peptide Sequence:** LHGGIDILVSNAAVNPFFGSLMDVTEEVWWDK

**Total Number of Spectra:** 1

**Number of Replicates (out of 8):** 1

**Best Match Score:** 63.724

**Best Match Posterior Error Probability:** 6.71E-05

**Best Match Spectrum:**

|                    |           |                  |                                     |
|--------------------|-----------|------------------|-------------------------------------|
| <b>Scan number</b> | 94731     | <b>Raw file</b>  | A549-US-Mock-top20CID-Elite-2ug-B14 |
| <b>Method</b>      | ITMS; CID | <b>Genenames</b> | DHRS4L2                             |

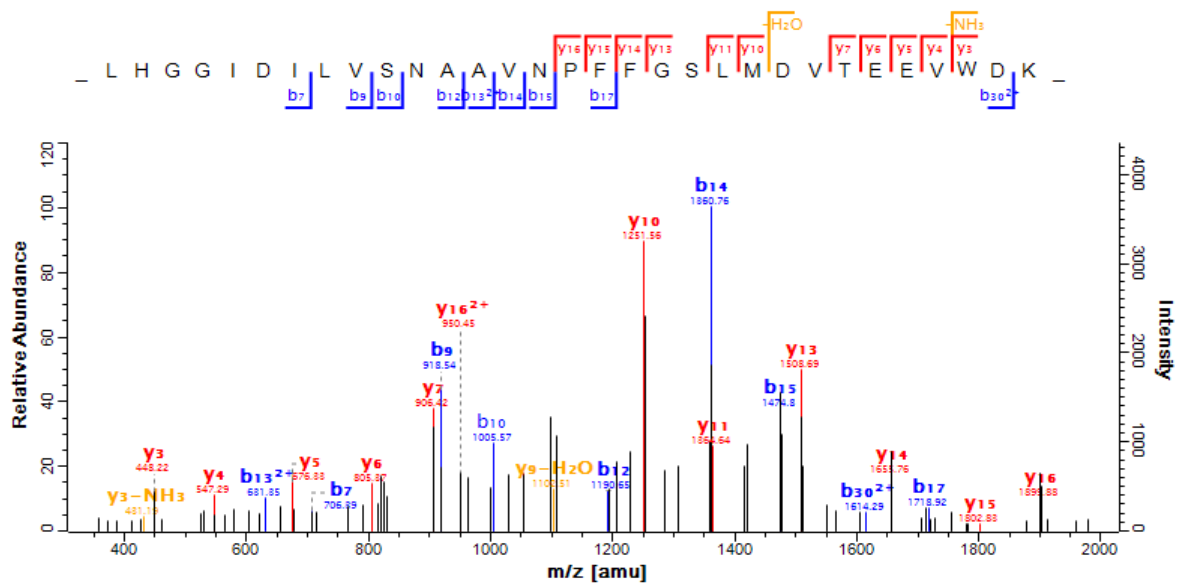

**Protein Group ID:** 665  
**Protein Accession Numbers:** Q8TBZ6; D6R954  
**Gene Names:** RG9MTD2  
**Peptide Sequence:** QGINEDQEESQKPR  
**Total Number of Spectra:** 2  
**Number of Replicates (out of 8):** 2  
**Best Match Score:** 113.76  
**Best Match Posterior Error Probability:** 0.00057829  
**Best Match Spectrum:**

**Scan number** 4401      **Raw file** A549-US-WT-top20CID-Elite-2ug-B11  
**Method** ITMS; CID      **Genenames** RG9MTD2

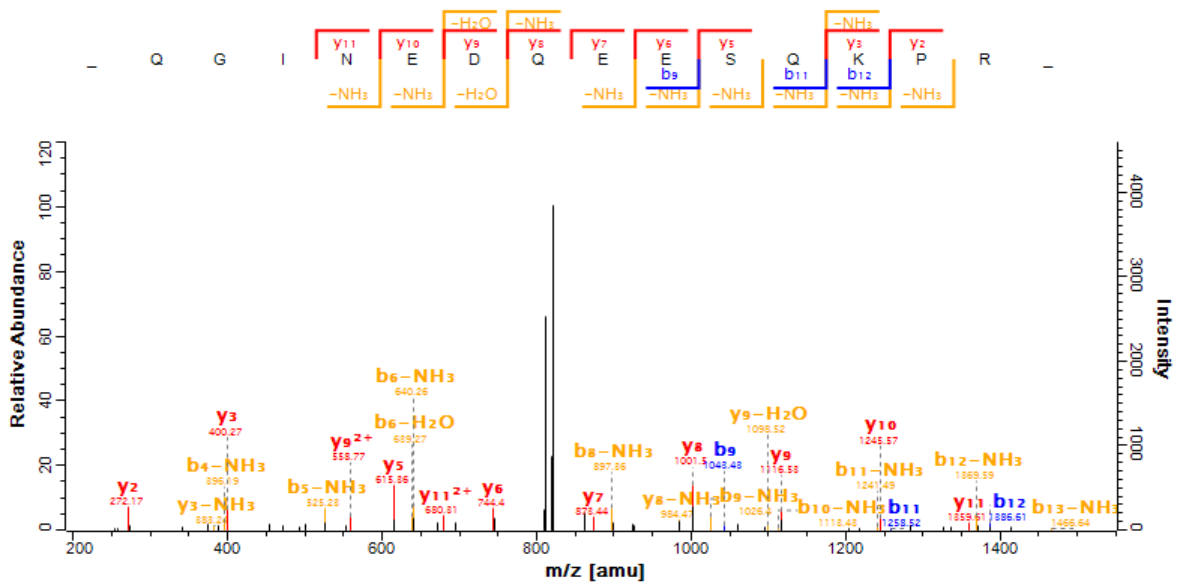



**Protein Group ID:** 670  
**Protein Accession Numbers:** Q96BQ5; D6R9R2  
**Gene Names:** CCDC127  
**Peptide Sequence:** MNNLNDPPNWNIRPNSR  
**Total Number of Spectra:** 1  
**Number of Replicates (out of 8):** 1  
**Best Match Score:** 107.5  
**Best Match Posterior Error Probability:** 0.0004282  
**Best Match Spectrum:**

**Scan number** 21898      **Raw file** A549-US-Mock-top20CID-Elite-2ug-B13  
**Method** ITMS; CID      **Genenames** CCDC127

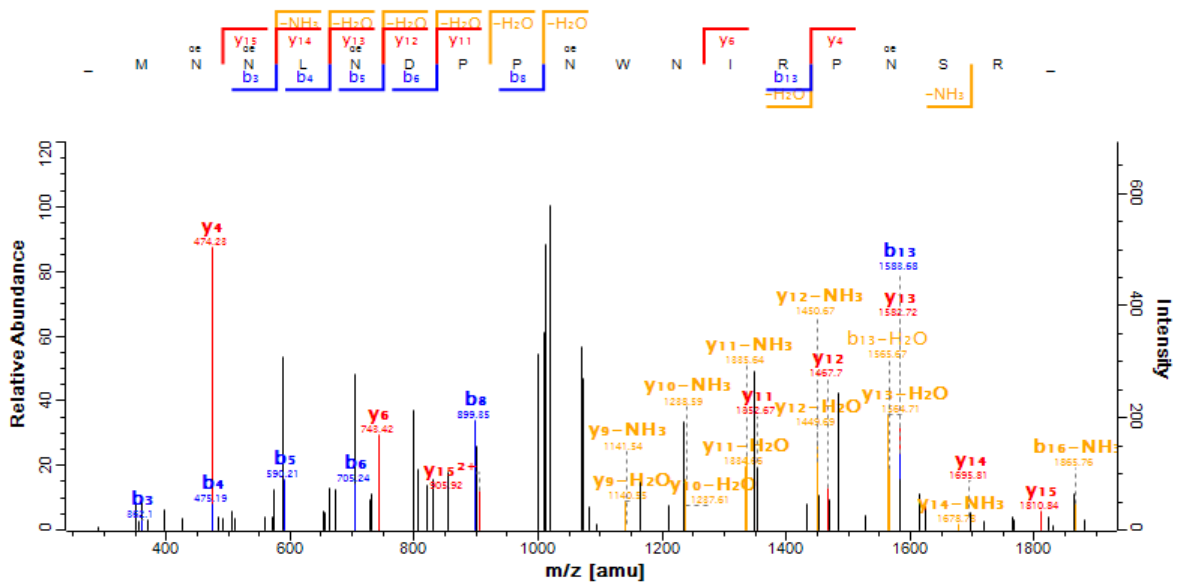

**Protein Group ID:** 671

**Protein Accession Numbers:** Q8NEC7; Q8NEC7-3; D6R9W2

**Gene Names:** GSTCD

**Peptide Sequence:** VHTQETSEGLDSSSK

**Total Number of Spectra:** 1

**Number of Replicates (out of 8):** 1

**Best Match Score:** 115.38

**Best Match Posterior Error Probability:** 8.87E-05

**Best Match Spectrum:**

**Scan number** 4511      **Raw file** A549-US-WT-top20CID-Elite-2ug-B11  
**Method** ITMS; CID      **Genenames** GSTCD

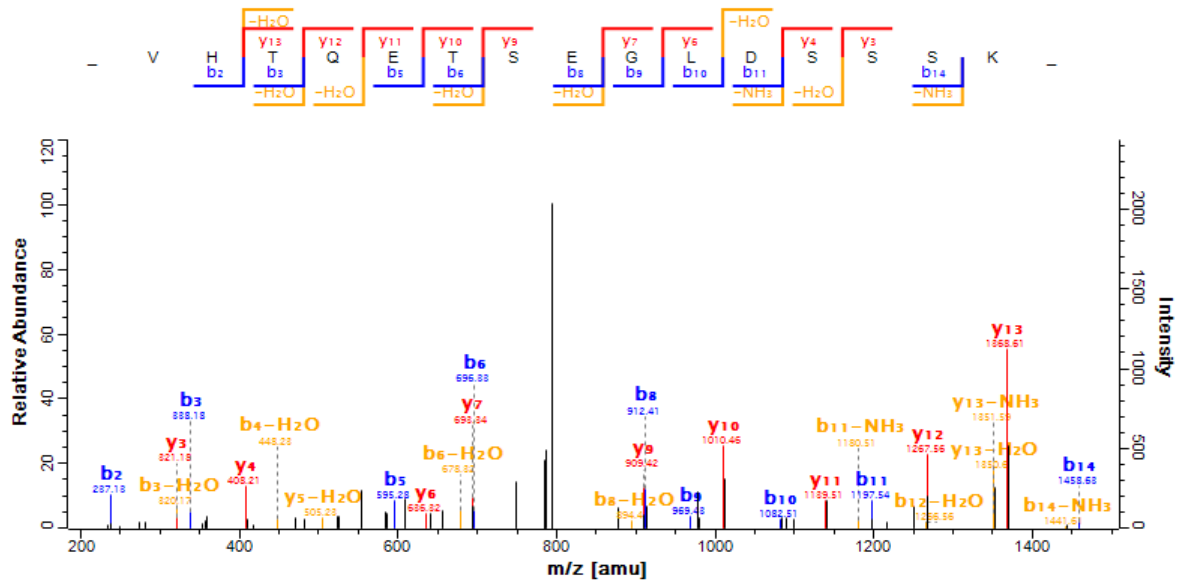

**Protein Group ID:** 672

**Protein Accession Numbers:** D6RE79; Q14728; D6RA47; D6RIZ4

**Gene Names:** MFSD10

**Peptide Sequence:** DAADLLSPLALLR

**Total Number of Spectra:** 4

**Number of Replicates (out of 8):** 4

**Best Match Score:** 100.38

**Best Match Posterior Error Probability:** 0.00050349

**Best Match Spectrum:**

|                    |           |                  |                                   |
|--------------------|-----------|------------------|-----------------------------------|
| <b>Scan number</b> | 88858     | <b>Raw file</b>  | A549-US-WT-top20CID-Elite-2ug-B11 |
| <b>Method</b>      | ITMS; CID | <b>Genenames</b> | MFSD10                            |

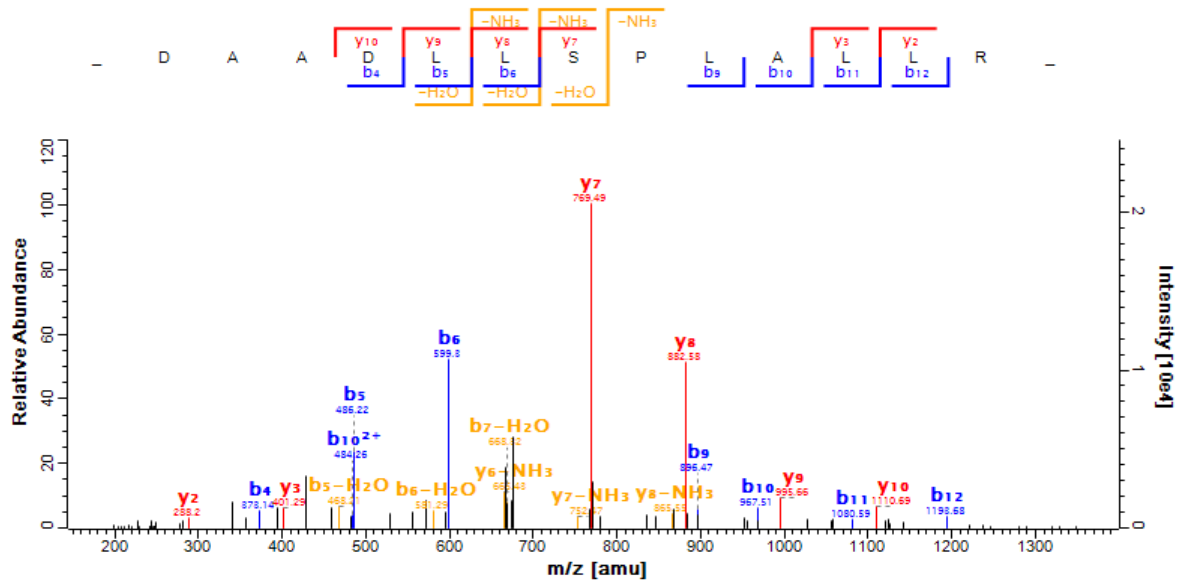

**Protein Group ID:** 683

**Protein Accession Numbers:** Q9BVS4; D6RDI3; H0Y919

**Gene Names:** RIOK2

**Peptide Sequence:** GQVVENNSVTEFSEEK

**Total Number of Spectra:** 7

**Number of Replicates (out of 8):** 5

**Best Match Score:** 180.64

**Best Match Posterior Error Probability:** 2.64E-20

**Best Match Spectrum:**

**Scan number** 29618      **Raw file** A549-US-Mock-top20CID-Elite-2ug-B14  
**Method** ITMS; CID      **Genenames** RIOK2

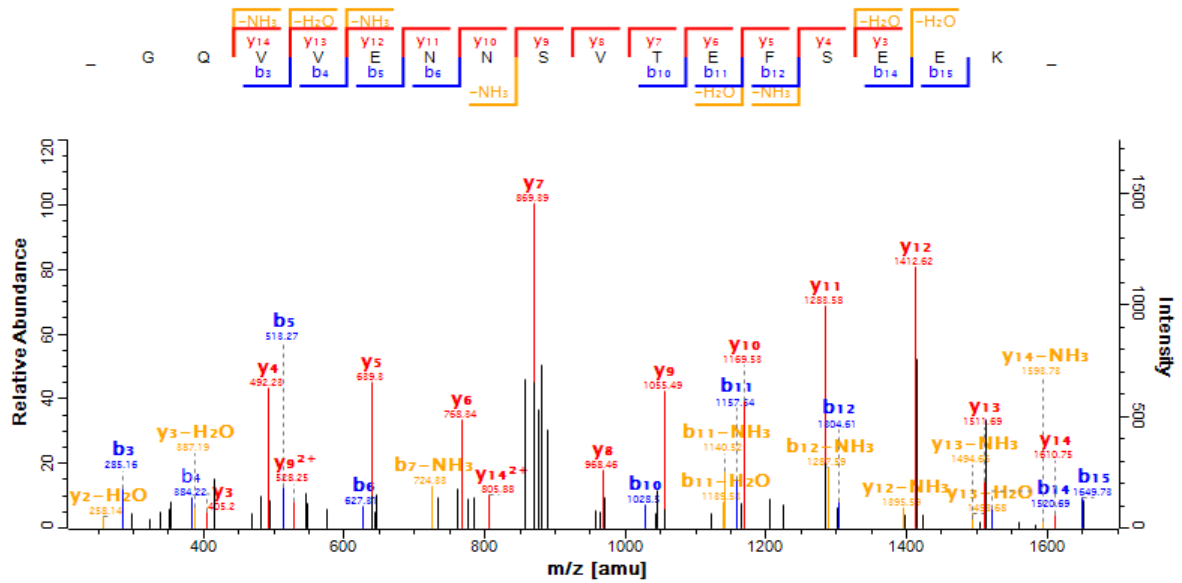

**Protein Group ID:** 684

**Protein Accession Numbers:** Q709F0; Q709F0-2; Q709F0-3; D6RDI8

**Gene Names:** ACAD11

**Peptide Sequence:** VEGLWNLFLPAVSGLSLHVDYALIAEETGK

**Total Number of Spectra:** 2

**Number of Replicates (out of 8):** 2

**Best Match Score:** 61.417

**Best Match Posterior Error Probability:** 0.00033224

**Best Match Spectrum:**

**Scan number** 93990      **Raw file** A549-US-Mock-top20CID-Elite-2ug-B13  
**Method** ITMS; CID      **Genenames** ACAD11

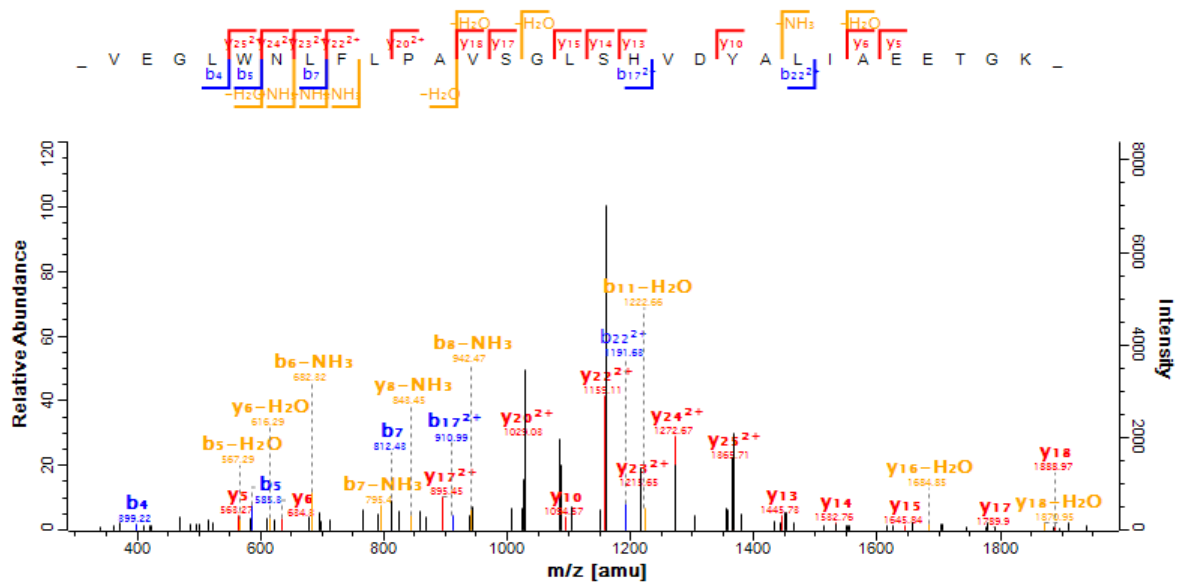

**Protein Group ID:** 686

**Protein Accession Numbers:** Q9NP73; Q9NP73-3; D6RE84; Q9NP73-2

**Gene Names:** ALG13

**Peptide Sequence:** LMNNHQLELAK

**Total Number of Spectra:** 1

**Number of Replicates (out of 8):** 1

**Best Match Score:** 89.266

**Best Match Posterior Error Probability:** 0.0015539

**Best Match Spectrum:**

|                    |           |                  |                                   |
|--------------------|-----------|------------------|-----------------------------------|
| <b>Scan number</b> | 22556     | <b>Raw file</b>  | A549-US-WT-top20CID-Elite-2ug-B12 |
| <b>Method</b>      | ITMS; CID | <b>Genenames</b> | ALG13                             |

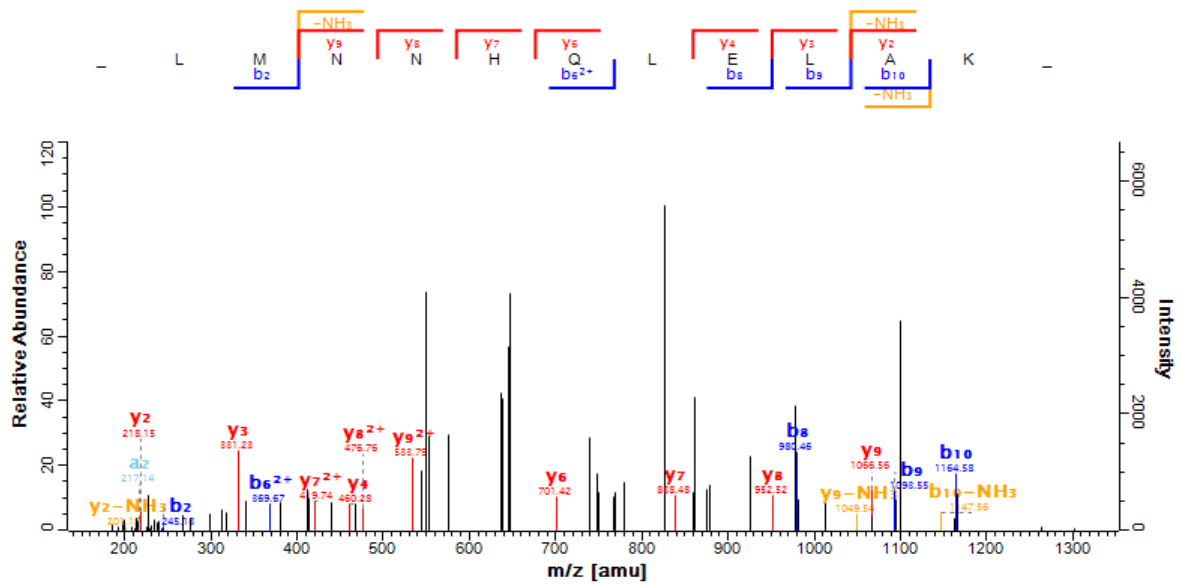

**Protein Group ID:** 688

**Protein Accession Numbers:** O00584; D6RHI9; D6REQ6; H0YAE9

**Gene Names:** RNASET2

**Peptide Sequence:** HGTCAAQVDALNSQK

**Total Number of Spectra:** 4

**Number of Replicates (out of 8):** 3

**Best Match Score:** 149.99

**Best Match Posterior Error Probability:** 8.66E-07

**Best Match Spectrum:**

**Scan number** 11730      **Raw file** A549-US-Mock-top20CID-Elite-2ug-B12  
**Method** ITMS; CID      **Genenames** RNASET2

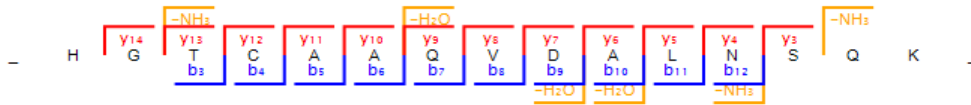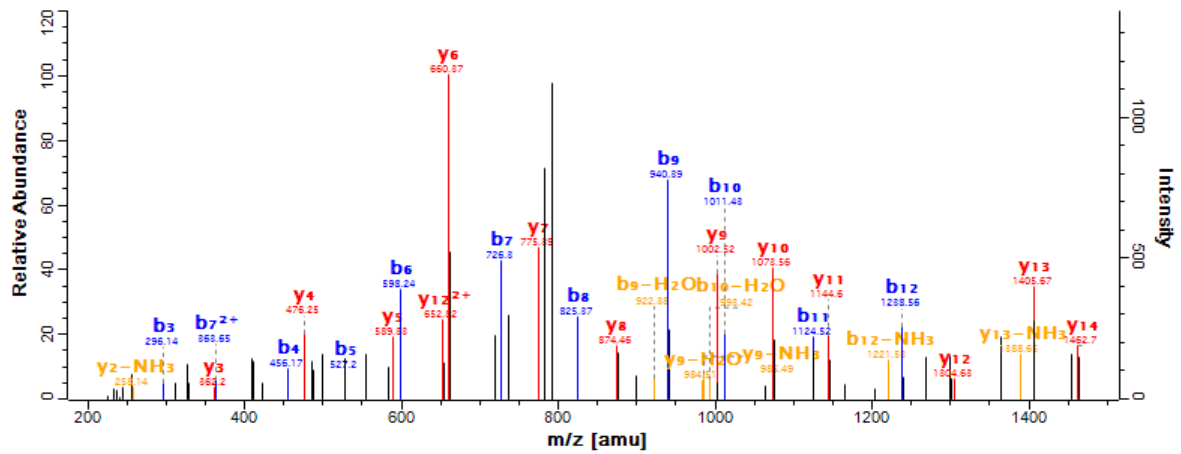

**Protein Group ID:** 692

**Protein Accession Numbers:** P55285; P55285-2; D6RF86

**Gene Names:** CDH6

**Peptide Sequence:** VEASNPYVEPR

**Total Number of Spectra:** 6

**Number of Replicates (out of 8):** 5

**Best Match Score:** 162.49

**Best Match Posterior Error Probability:** 1.17E-05

**Best Match Spectrum:**

|                    |           |                  |                                     |
|--------------------|-----------|------------------|-------------------------------------|
| <b>Scan number</b> | 16540     | <b>Raw file</b>  | A549-US-Mock-top20CID-Elite-2ug-B11 |
| <b>Method</b>      | ITMS; CID | <b>Genenames</b> | CDH6                                |

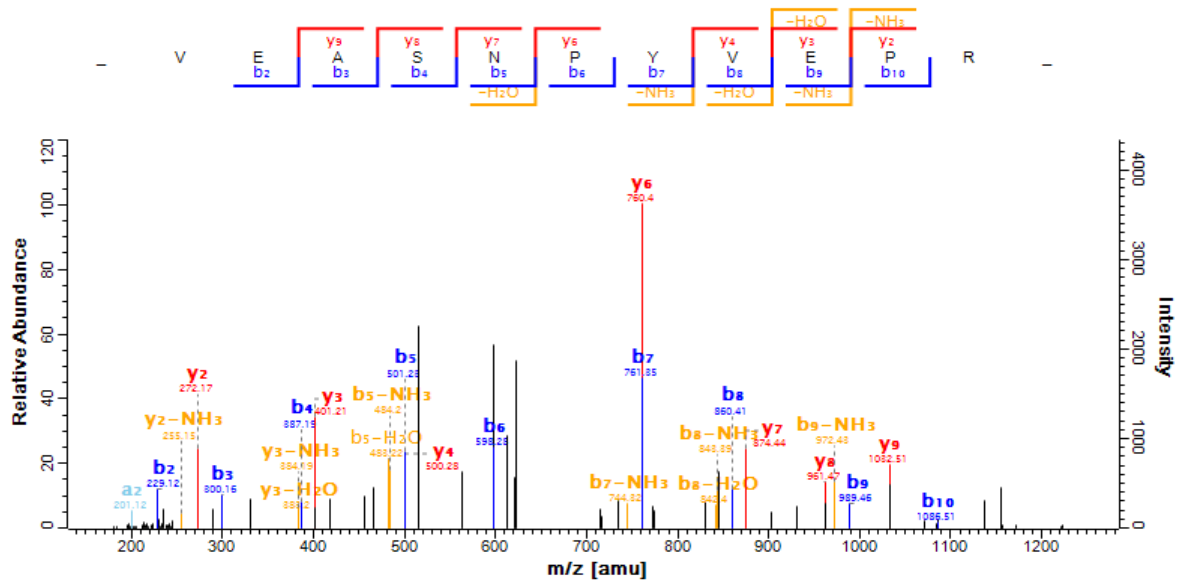



**Protein Group ID:** 697

**Protein Accession Numbers:** Q13888; Q6P1K8; F5GZM1; J3KQC7; D6RID8; D6RJD3; D6RGC9; D6RIT7

**Gene Names:** GTF2H2;GTF2H2C

**Peptide Sequence:** TMEDQDLKPNR

**Total Number of Spectra:** 7

**Number of Replicates (out of 8):** 6

**Best Match Score:** 133.07

**Best Match Posterior Error Probability:** 6.24E-06

**Best Match Spectrum:**

|                    |           |                  |                                     |
|--------------------|-----------|------------------|-------------------------------------|
| <b>Scan number</b> | 9062      | <b>Raw file</b>  | A549-US-Mock-top20CID-Elite-2ug-B12 |
| <b>Method</b>      | ITMS: CID | <b>Genenames</b> | GTF2H2;GTF2H2C                      |

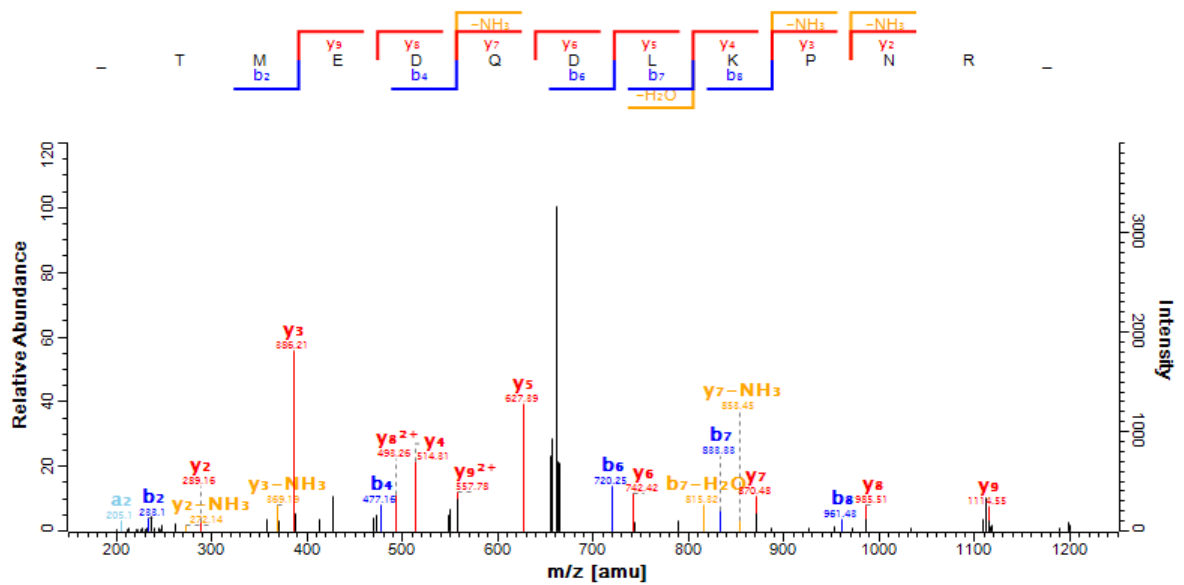

**Protein Group ID:** 699  
**Protein Accession Numbers:** D6RH22; Q9NRPO  
**Gene Names:** OSTC  
**Peptide Sequence:** VPFLVLECPNLK  
**Total Number of Spectra:** 11  
**Number of Replicates (out of 8):** 8  
**Best Match Score:** 136.53  
**Best Match Posterior Error Probability:** 7.56E-05  
**Best Match Spectrum:**

**Scan number** 65301      **Raw file** A549-US-Mock-top20CID-Elite-2ug-B12  
**Method** ITMS; CID      **Genenames** OSTC

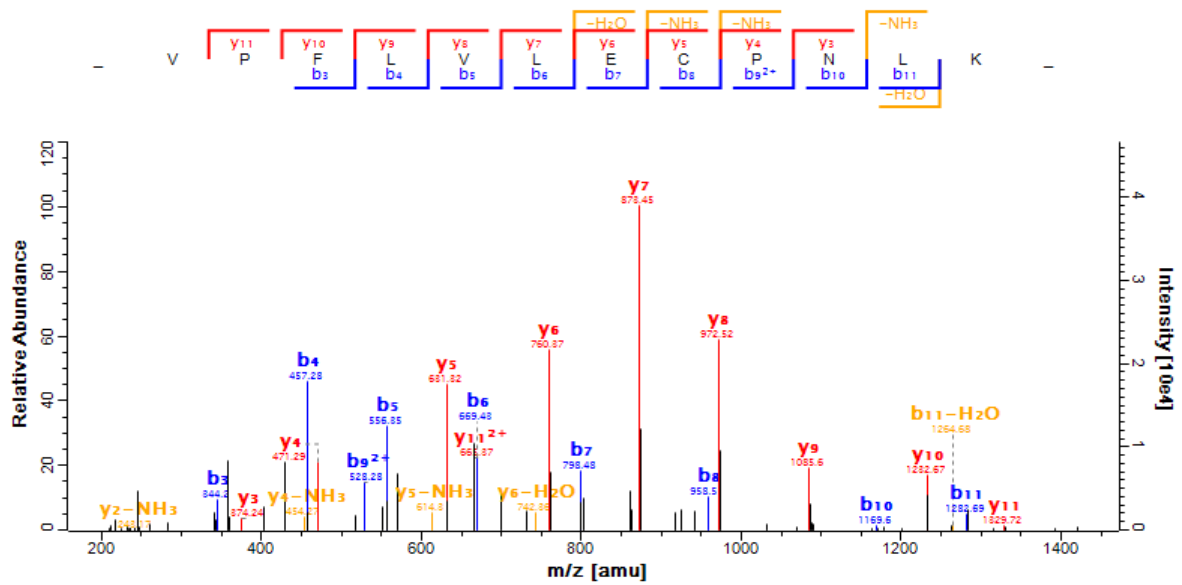

**Protein Group ID:** 703

**Protein Accession Numbers:** P35680; H0YL84; P35680-2; E0YMJ9; P35680-3

**Gene Names:** HNF1B

**Peptide Sequence:** ELQALNTEEEAAEQR

**Total Number of Spectra:** 2

**Number of Replicates (out of 8):** 2

**Best Match Score:** 158.93

**Best Match Posterior Error Probability:** 2.05E-09

**Best Match Spectrum:**

|                    |           |                  |                                     |
|--------------------|-----------|------------------|-------------------------------------|
| <b>Scan number</b> | 25933     | <b>Raw file</b>  | A549-US-Mock-top20CID-Elite-2ug-B14 |
| <b>Method</b>      | ITMS; CID | <b>Genenames</b> | HNF1B                               |

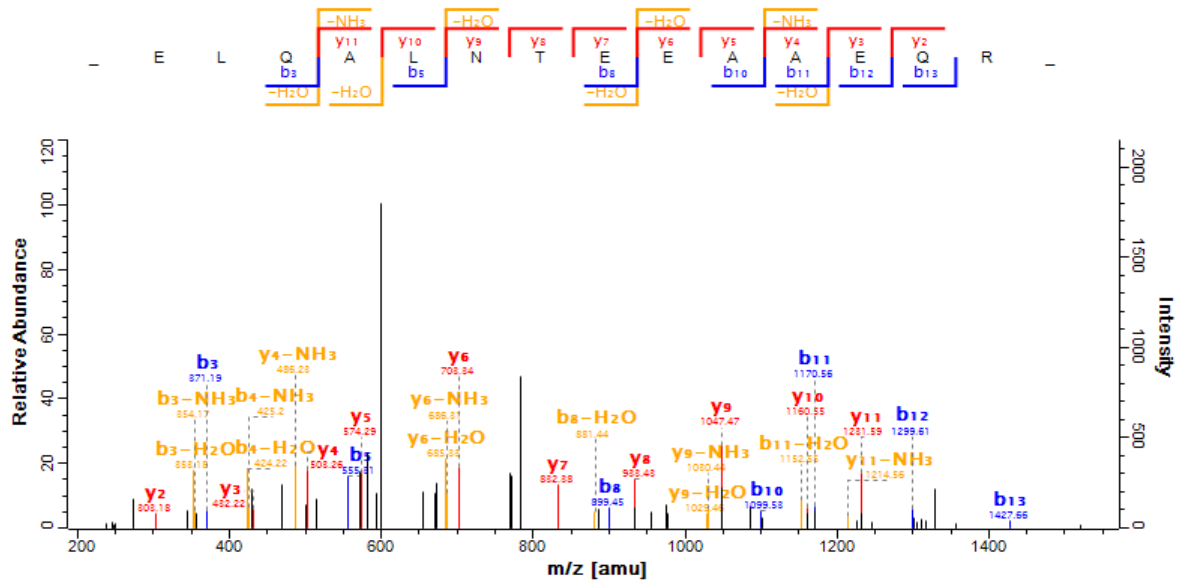

**Protein Group ID:** 705

**Protein Accession Numbers:** F6SH78; Q9NYP7; E2QRH7

**Gene Names:** ELOVL5

**Peptide Sequence:** DHQNGSMAAVNGHTNSFSPLENNVK

**Total Number of Spectra:** 2

**Number of Replicates (out of 8):** 2

**Best Match Score:** 83.602

**Best Match Posterior Error Probability:** 0.00073784

**Best Match Spectrum:**

**Scan number** 37718      **Raw file** A549-US-WT-top20CID-Elite-2ug-B12  
**Method** ITMS; CID      **Genenames** ELOVL5

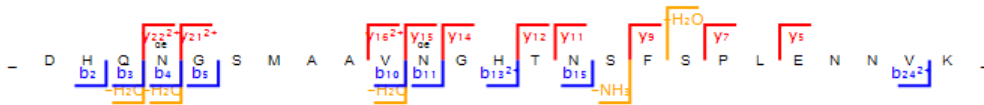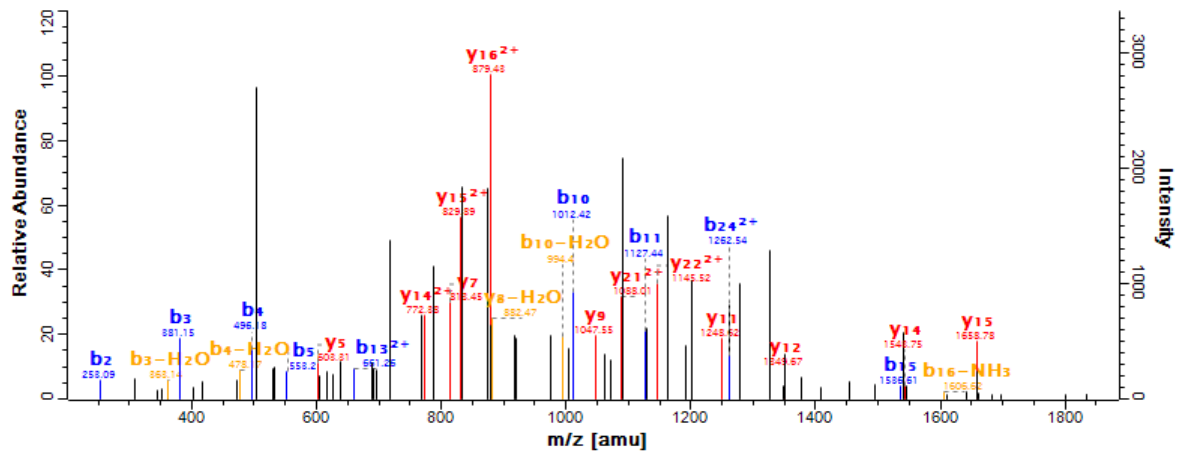

**Protein Group ID:** 707

**Protein Accession Numbers:** O75330-3; O75330; O75330-2; O75330-4; E3W978

**Gene Names:** HMMR

**Peptide Sequence:** NAEDVQHQLATISSNQEYVR

**Total Number of Spectra:** 1

**Number of Replicates (out of 8):** 1

**Best Match Score:** 88.574

**Best Match Posterior Error Probability:** 9.80E-05

**Best Match Spectrum:**

|                    |           |                  |                                     |
|--------------------|-----------|------------------|-------------------------------------|
| <b>Scan number</b> | 40126     | <b>Raw file</b>  | A549-US-Mock-top20CID-Elite-2ug-B11 |
| <b>Method</b>      | ITMS; CID | <b>Genenames</b> | HMMR                                |

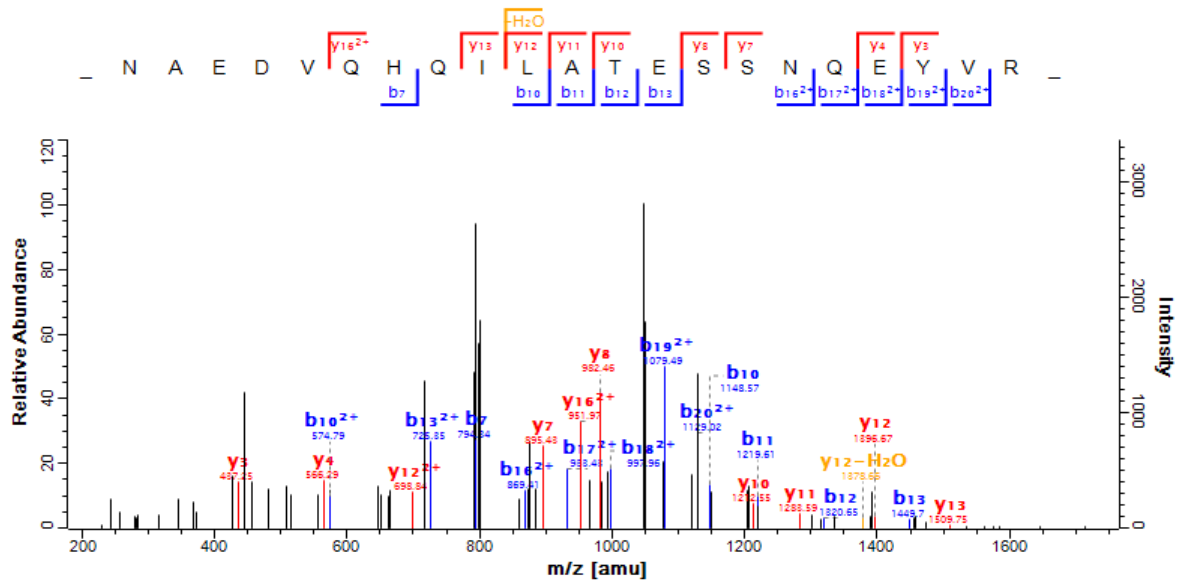

**Protein Group ID:** 710  
**Protein Accession Numbers:** Q96MF7; E5RFJ1  
**Gene Names:** NSMCE2  
**Peptide Sequence:** VCGHTYEEDAIVR  
**Total Number of Spectra:** 3  
**Number of Replicates (out of 8):** 3  
**Best Match Score:** 113.99  
**Best Match Posterior Error Probability:** 0.00025087  
**Best Match Spectrum:**

**Scan number** 19542      **Raw file** A549-US-Mock-top20CID-Elite-2ug-B12  
**Method** ITMS; CID      **Genenames** NSMCE2

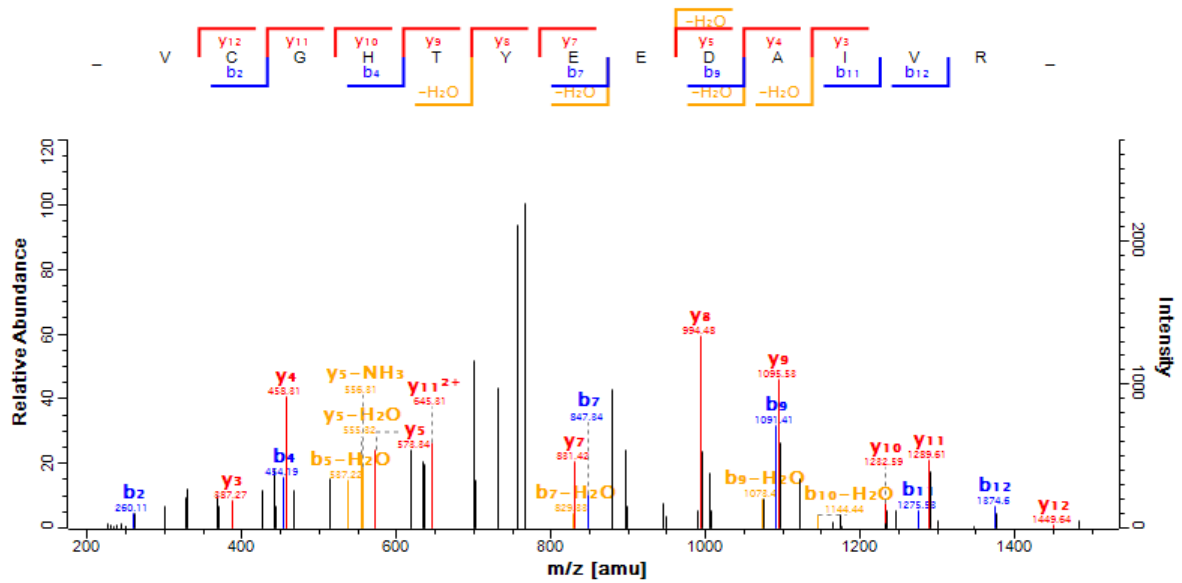

**Protein Group ID:** 712

**Protein Accession Numbers:** Q75QN2; Q75QN2-2; J3KNV5; E5RG48; E5RIN8; H0YBQ1; E5RJF0; E5RJL5

**Gene Names:** INTS8

**Peptide Sequence:** PGPPQLSVMNQMEK

**Total Number of Spectra:** 1

**Number of Replicates (out of 8):** 1

**Best Match Score:** 118.47

**Best Match Posterior Error Probability:** 0.00017722

**Best Match Spectrum:**

**Scan number** 42584      **Raw file** A549-US-Mock-top20CID-Elite-2ug-B11  
**Method** ITMS: CID      **Genenames** INTS8

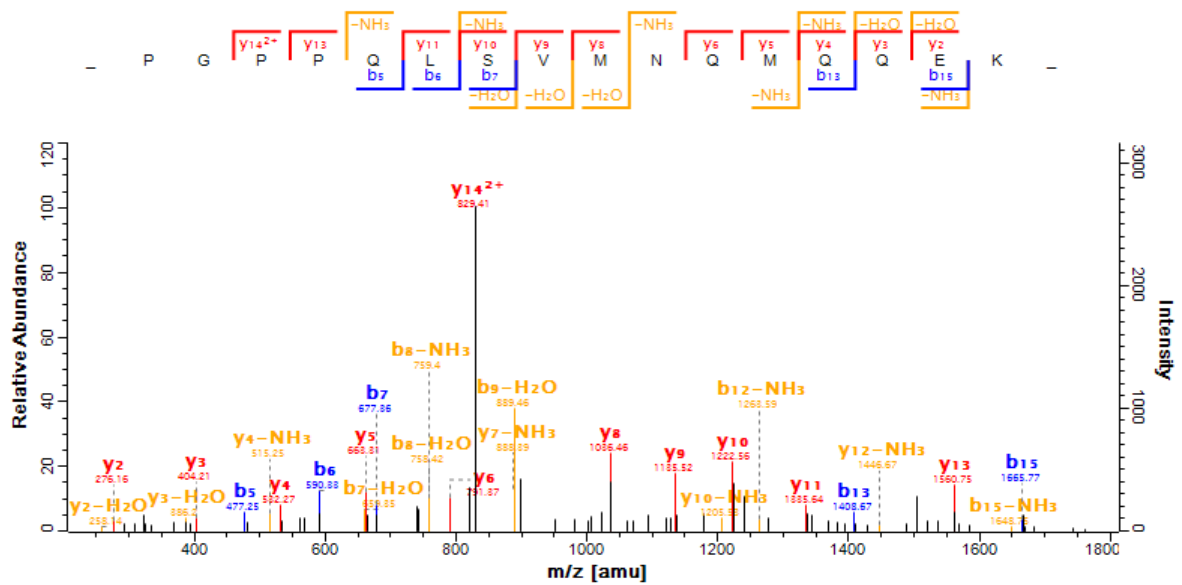

**Protein Group ID:** 714

**Protein Accession Numbers:** Q9BRU9; E5RGP0; Q9BRU9-2; G3XAM4

**Gene Names:** UTP23

**Peptide Sequence:** YLMGETQLCTTR

**Total Number of Spectra:** 1

**Number of Replicates (out of 8):** 1

**Best Match Score:** 90.731

**Best Match Posterior Error Probability:** 0.0013583

**Best Match Spectrum:**

**Scan number** 34827      **Raw file** A549-US-WT-top20CID-Elite-2ug-B11  
**Method** ITMS; CID      **Genenames** UTP23

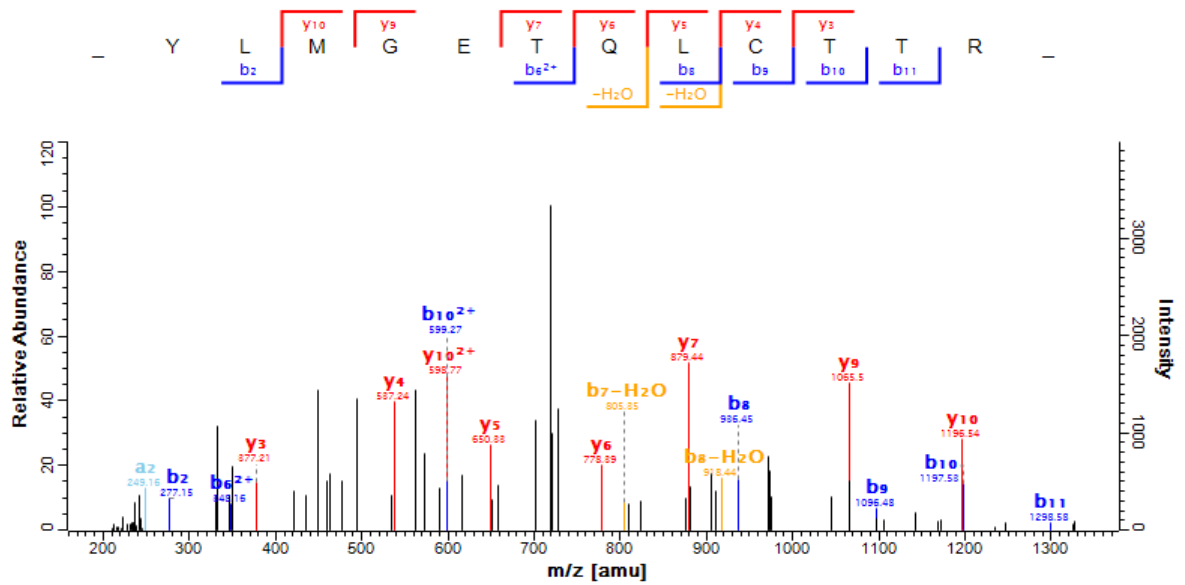



**Protein Group ID:** 715

**Protein Accession Numbers:** Q9H6H4; E5RGS2; E5RJV5; Q9H6H4-2

**Gene Names:** REEP4

**Peptide Sequence:** EIDAYIVQAK

**Total Number of Spectra:** 2

**Number of Replicates (out of 8):** 2

**Best Match Score:** 137.95

**Best Match Posterior Error Probability:** 1.07E-05

**Best Match Spectrum:**

**Scan number** 32954      **Raw file** A549-US-Mock-top20CID-Elite-2ug-B13  
**Method** ITMS; CID      **Genenames** REEP4

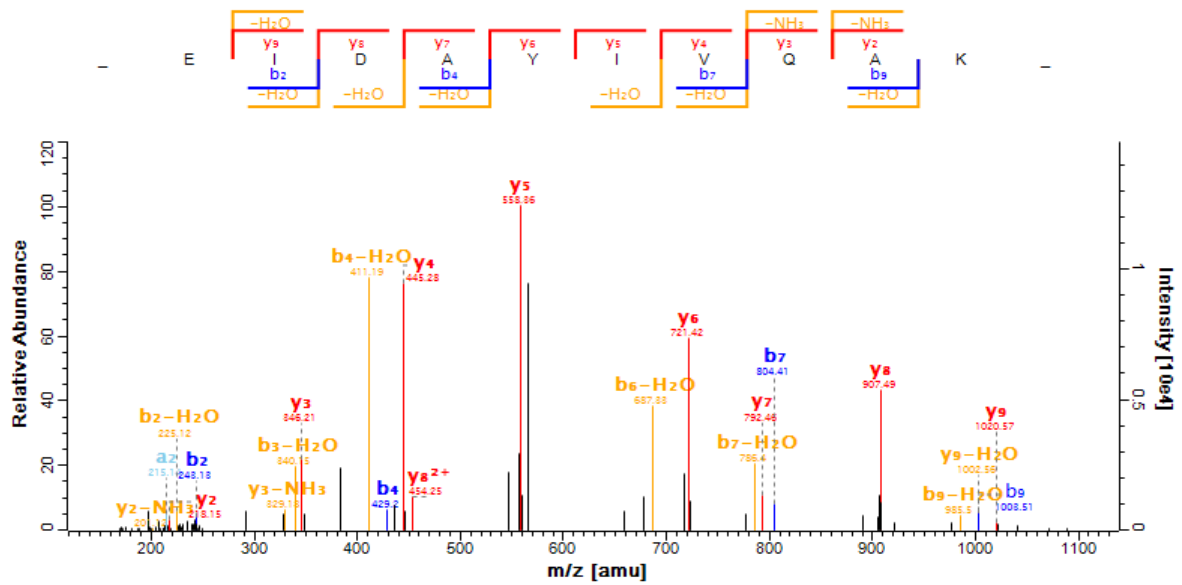

**Protein Group ID:** 718

**Protein Accession Numbers:** Q93045-2; Q93045; E5RGX5

**Gene Names:** STMN2

**Peptide Sequence:** ALEENNNFSK

**Total Number of Spectra:** 16

**Number of Replicates (out of 8):** 8

**Best Match Score:** 134.3

**Best Match Posterior Error Probability:** 7.36E-06

**Best Match Spectrum:**

**Scan number** 9765      **Raw file** A549-US-WT-top20CID-Elite-2ug-B12  
**Method** ITMS; CID      **Genenames** STMN2

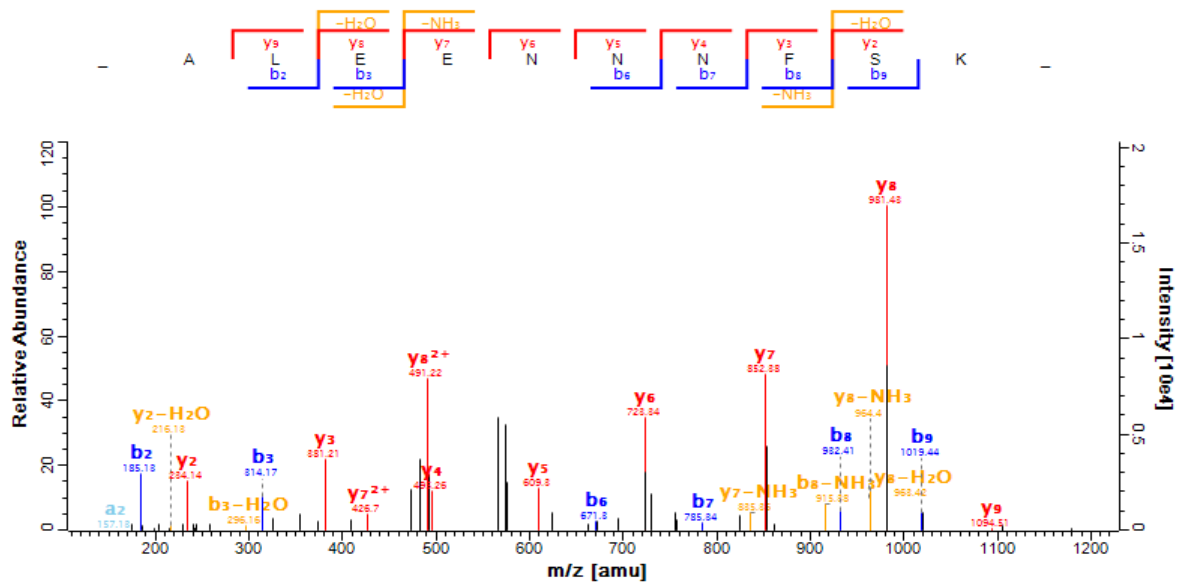

**Protein Group ID:** 721

**Protein Accession Numbers:** Q9Y5V0; E5RHR6; H0YAP1; E5RHV4

**Gene Names:** ZNF706

**Peptide Sequence:** AALIYTCTVCR

**Total Number of Spectra:** 2

**Number of Replicates (out of 8):** 2

**Best Match Score:** 87.568

**Best Match Posterior Error Probability:** 0.0017303

**Best Match Spectrum:**

**Scan number** 32018      **Raw file** A549-US-Mock-top20CID-Elite-2ug-B12  
**Method** ITMS; CID      **Genenames** ZNF706

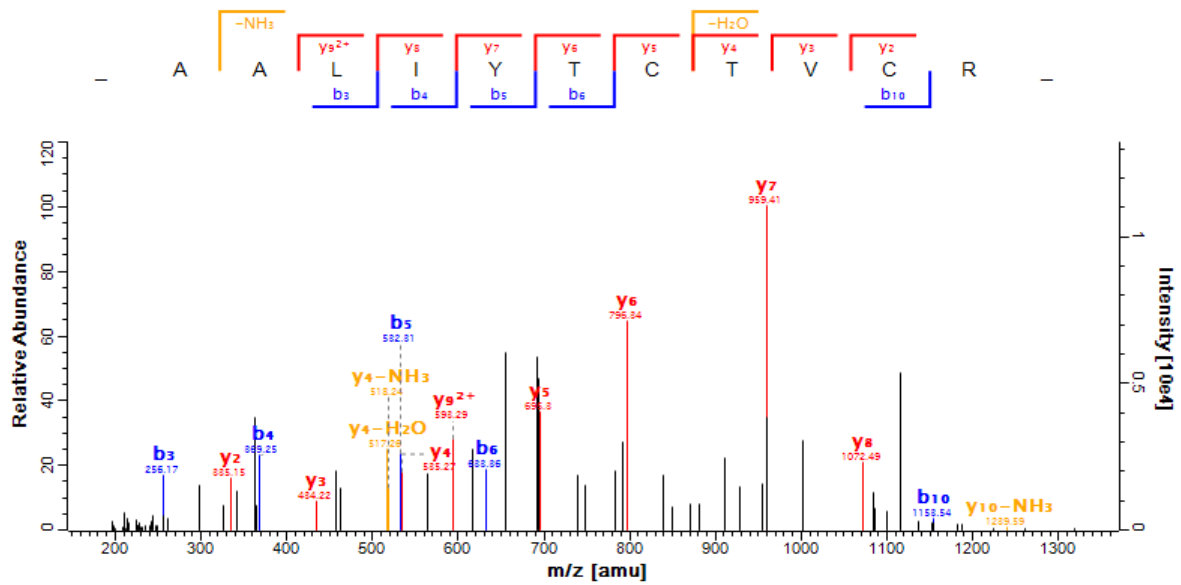

**Protein Group ID:** 724

**Protein Accession Numbers:** Q9NPA8; E5RHX8; G3V117

**Gene Names:** ENY2

**Peptide Sequence:** GLEHVTVDLVAEITPK

**Total Number of Spectra:** 6

**Number of Replicates (out of 8):** 6

**Best Match Score:** 118.52

**Best Match Posterior Error Probability:** 0.00011484

**Best Match Spectrum:**

**Scan number** 69846      **Raw file** A549-US-Mock-top20CID-Elite-2ug-B11  
**Method** ITMS; CID      **Genenames** ENY2

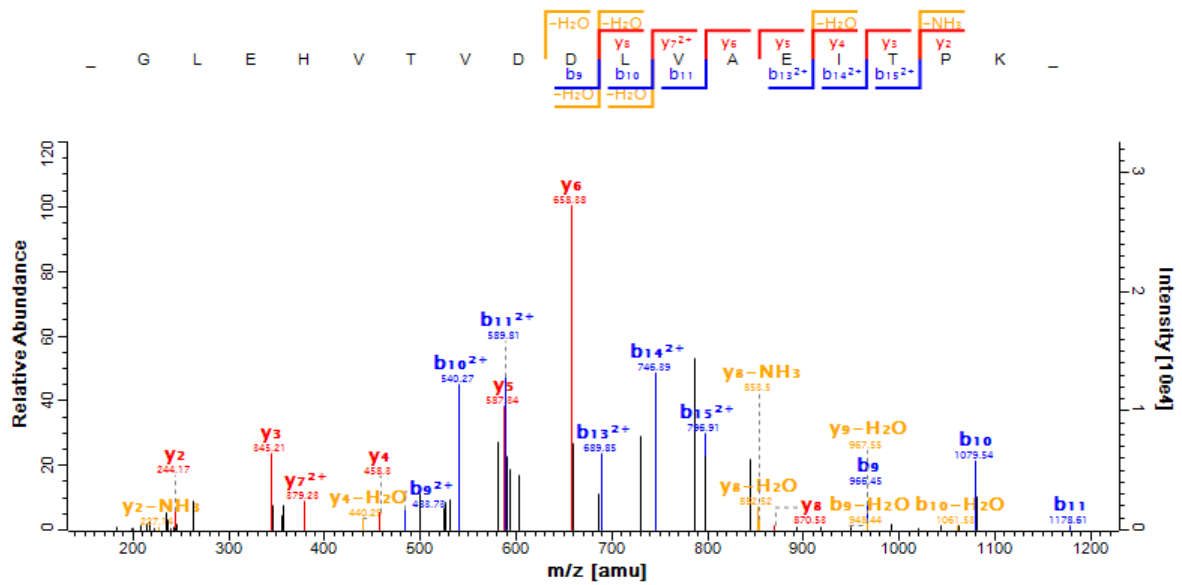

**Protein Group ID:** 726

**Protein Accession Numbers:** E9PFX0; Q96D42; E5RIF6

**Gene Names:** HAVCR1

**Peptide Sequence:** VGGEAGPSVTLPLCHYSGAVTSMCWNR

**Total Number of Spectra:** 6

**Number of Replicates (out of 8):** 5

**Best Match Score:** 91.238

**Best Match Posterior Error Probability:** 1.21E-05

**Best Match Spectrum:**

**Scan number** 53849      **Raw file** A549-US-Mock-top20CID-Elite-2ug-B12  
**Method** ITMS; CID      **Genenames** HAVCR1

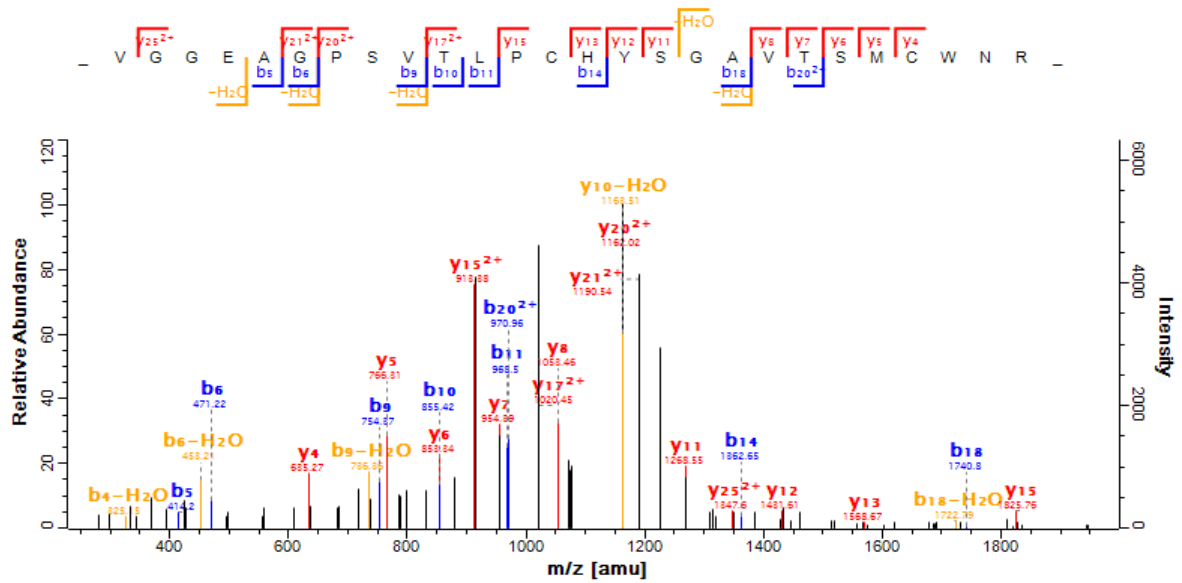

**Protein Group ID:** 732

**Protein Accession Numbers:** Q15390; E5RJS5; E7EP84; H0YBZ4

**Gene Names:** MTFR1

**Peptide Sequence:** SRPPLQDDLLFFEK

**Total Number of Spectra:** 1

**Number of Replicates (out of 8):** 1

**Best Match Score:** 123.76

**Best Match Posterior Error Probability:** 0.00015484

**Best Match Spectrum:**

|                    |           |                  |                                     |
|--------------------|-----------|------------------|-------------------------------------|
| <b>Scan number</b> | 63939     | <b>Raw file</b>  | A549-US-Mock-top20CID-Elite-2ug-B13 |
| <b>Method</b>      | ITMS; CID | <b>Genenames</b> | MTFR1                               |

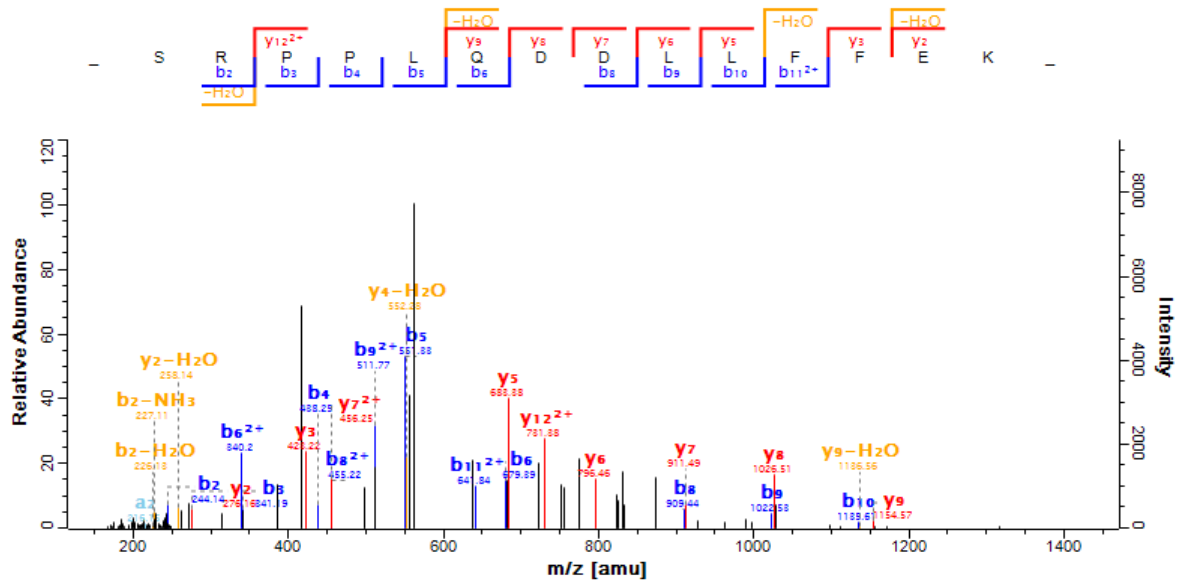

**Protein Group ID:** 736

**Protein Accession Numbers:** Q99952; E7EMB8; Q99952-2

**Gene Names:** PTPN18

**Peptide Sequence:** RGAPAGASGTQTGTGTGTGAR

**Total Number of Spectra:** 1

**Number of Replicates (out of 8):** 1

**Best Match Score:** 65.085

**Best Match Posterior Error Probability:** 0.0033715

**Best Match Spectrum:**

|                    |           |                  |                                   |
|--------------------|-----------|------------------|-----------------------------------|
| <b>Scan number</b> | 3597      | <b>Raw file</b>  | A549-US-WT-top20CID-Elite-2ug-B14 |
| <b>Method</b>      | ITMS; CID | <b>Genenames</b> | PTPN18                            |

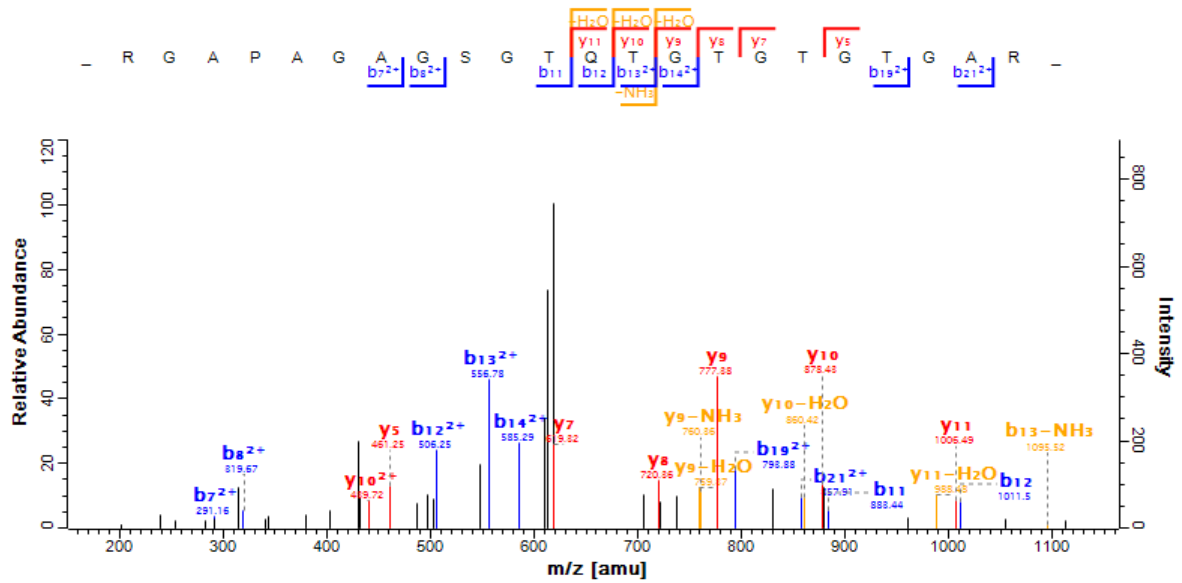

**Protein Group ID:** 737

**Protein Accession Numbers:** O95208; E9PBC2; O95208-2; I3L2B2; E7EMC3; E9PBC1; F6PQP6; J3QLN2; J3KSC7; J3KSA6; J3QRG9; J3KTF6; J3KSF8

**Gene Names:** EPN2

**Peptide Sequence:** NIVNNYSEAEIK

**Total Number of Spectra:** 3

**Number of Replicates (out of 8):** 3

**Best Match Score:** 155.86

**Best Match Posterior Error Probability:** 6.66E-07

**Best Match Spectrum:**

Scan number 31161 Raw file A549-US-WT-top20CID-Elite-2ug-B11  
Method ITMS: CID Genenames EPN2

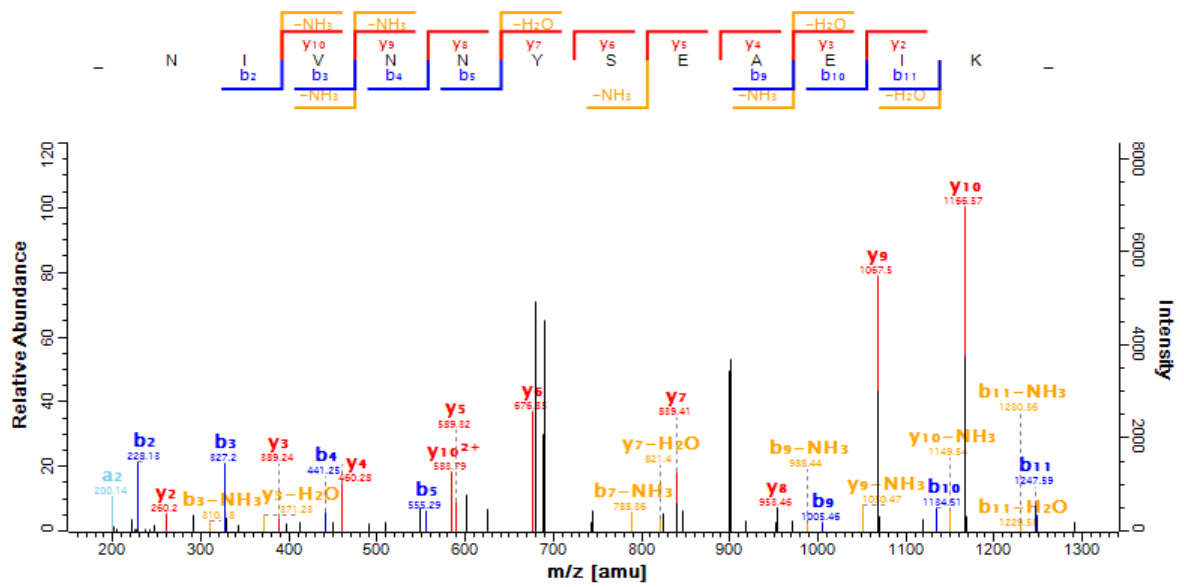



**Protein Group ID:** 738

**Protein Accession Numbers:** Q96PM5; Q96PM5-2; E7ETW5; J3KPI0; E7EMC8

**Gene Names:** RCHY1

**Peptide Sequence:** ICESYNTAQAGGR

**Total Number of Spectra:** 2

**Number of Replicates (out of 8):** 2

**Best Match Score:** 111.12

**Best Match Posterior Error Probability:** 0.00030214

**Best Match Spectrum:**

**Scan number** 10162      **Raw file** A549-US-Mock-top20CID-Elite-2ug-B11  
**Method** ITMS; CID      **Genenames** RCHY1

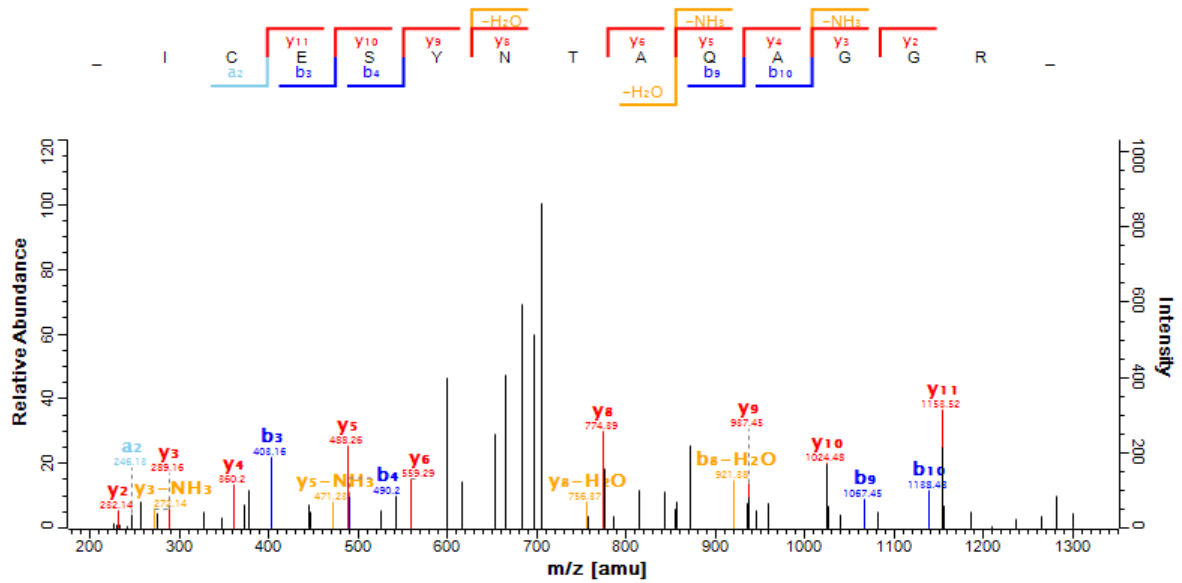

**Protein Group ID:** 739  
**Protein Accession Numbers:** O43572; E7EMD6  
**Gene Names:** AKAP10  
**Peptide Sequence:** SIEQDAVNTFTK  
**Total Number of Spectra:** 1  
**Number of Replicates (out of 8):** 1  
**Best Match Score:** 98.337  
**Best Match Posterior Error Probability:** 0.00059274  
**Best Match Spectrum:**

**Scan number** 43127      **Raw file** A549-US-Mock-top20CID-Elite-2ug-B12  
**Method** ITMS; CID      **Genenames** AKAP10

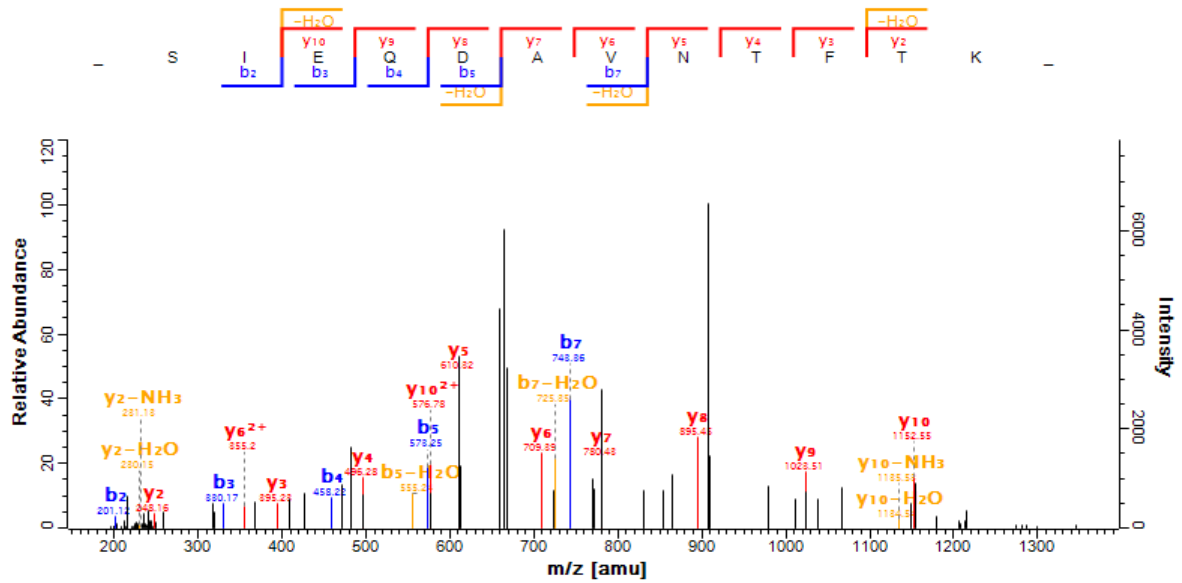

**Protein Group ID:** 749

**Protein Accession Numbers:** Q8TB03; E7EN46; Q8TB03-2

**Gene Names:** CXorf38

**Peptide Sequence:** IEQLLTSDWAVHIPEEDQR

**Total Number of Spectra:** 2

**Number of Replicates (out of 8):** 1

**Best Match Score:** 67.646

**Best Match Posterior Error Probability:** 0.0033773

**Best Match Spectrum:**

**Scan number** 64719      **Raw file** A549-US-WT-top20CID-Elite-2ug-B11  
**Method** ITMS; CID      **Genenames** CXorf38

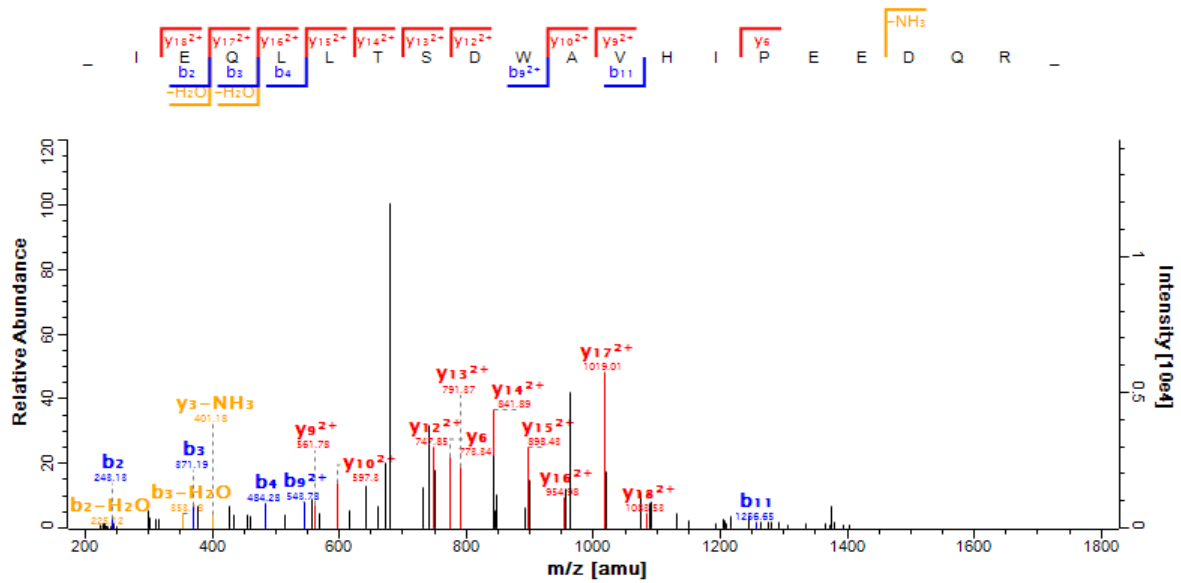

**Protein Group ID:** 751

**Protein Accession Numbers:** P28290; P28290-3; E9PHV5; P28290-2; E7END2; E7EUL7

**Gene Names:** SSFA2

**Peptide Sequence:** RVMEHDGQSLVK

**Total Number of Spectra:** 1

**Number of Replicates (out of 8):** 1

**Best Match Score:** 127.56

**Best Match Posterior Error Probability:** 0.00023681

**Best Match Spectrum:**

|                    |           |                  |                                   |
|--------------------|-----------|------------------|-----------------------------------|
| <b>Scan number</b> | 8741      | <b>Raw file</b>  | A549-US-WT-top20CID-Elite-2ug-B14 |
| <b>Method</b>      | ITMS; CID | <b>Genenames</b> | SSFA2                             |

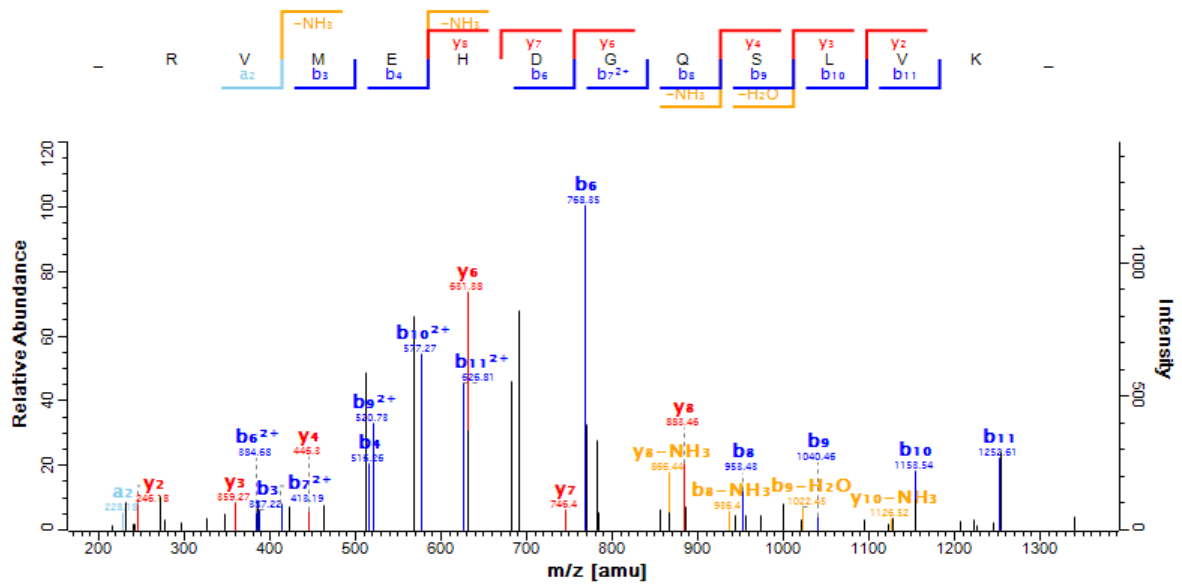

**Protein Group ID:** 754

**Protein Accession Numbers:** Q68CP9; Q68CP9-3; F8WCU9; F8W108; E7ENG3

**Gene Names:** ARID2

**Peptide Sequence:** KIEVMENPSCR

**Total Number of Spectra:** 1

**Number of Replicates (out of 8):** 1

**Best Match Score:** 114.24

**Best Match Posterior Error Probability:** 0.00025825

**Best Match Spectrum:**

**Scan number** 16164      **Raw file** A549-US-WT-top20CID-Elite-2ug-B13  
**Method** ITMS; CID      **Genenames** ARID2

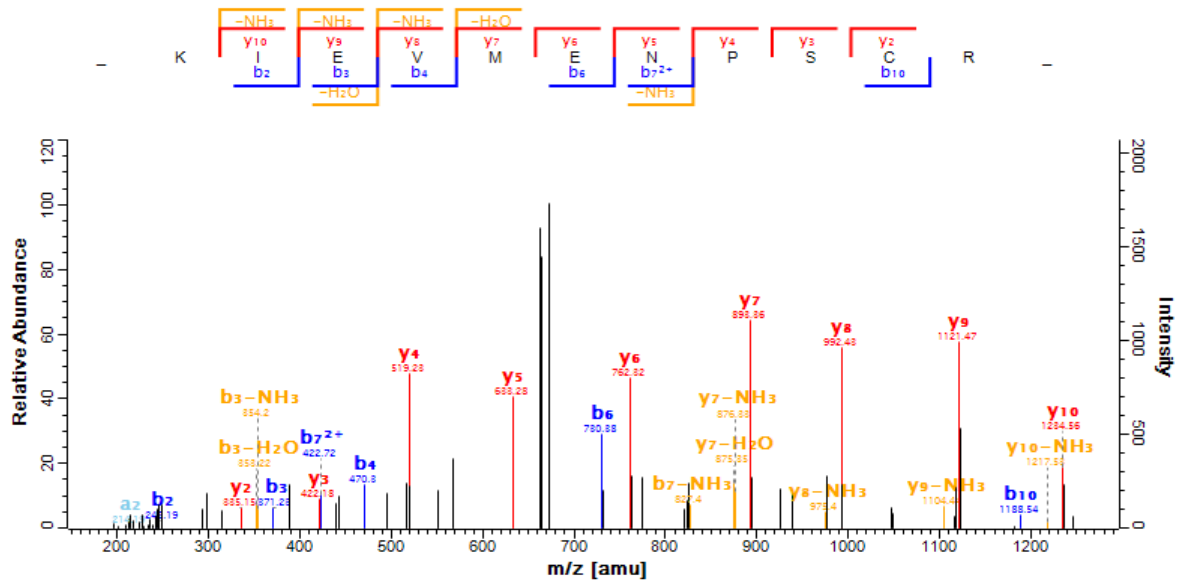

**Protein Group ID:** 756

**Protein Accession Numbers:** Q8NF91; E9PEL9; Q8NF91-4; E7ENN3; Q8NF91-2; Q8NF91-8

**Gene Names:** SYNE1

**Peptide Sequence:** VLFTSLADNK

**Total Number of Spectra:** 1

**Number of Replicates (out of 8):** 1

**Best Match Score:** 89.247

**Best Match Posterior Error Probability:** 0.0020755

**Best Match Spectrum:**

|                    |           |                  |                                   |
|--------------------|-----------|------------------|-----------------------------------|
| <b>Scan number</b> | 34645     | <b>Raw file</b>  | A549-US-WT-top20CID-Elite-2ug-B12 |
| <b>Method</b>      | ITMS; CID | <b>Genenames</b> | SYNE1                             |

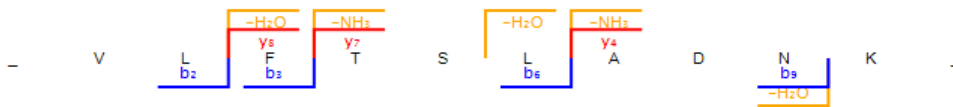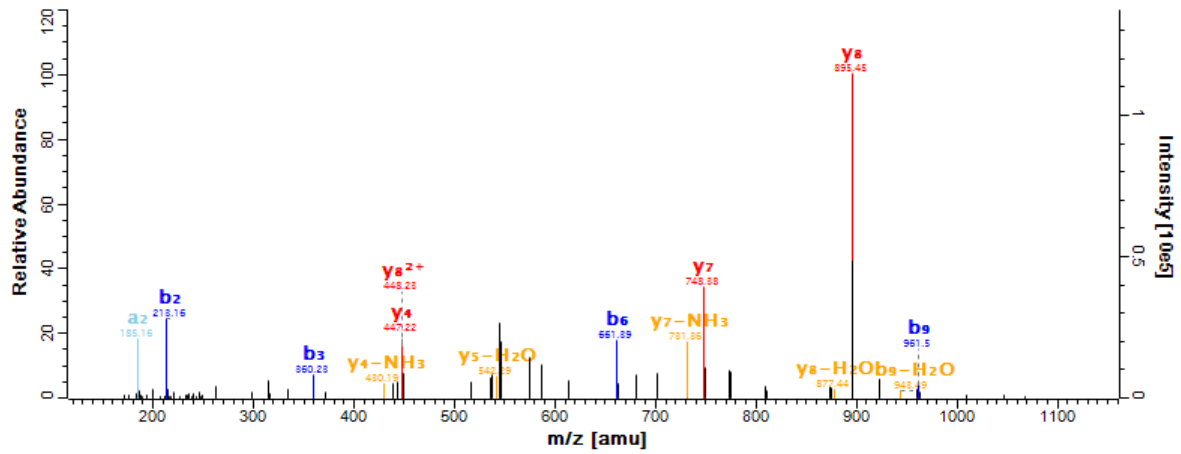

**Protein Group ID:** 760

**Protein Accession Numbers:** J3KNB2; Q9NYB9; Q9NYB9-4; E7EP65; E7EW77; Q9NYB9-2; E9PEZ7; F8WEB9; F8WAQ3; F8WBL5

**Gene Names:** ABI2

**Peptide Sequence:** VADYCENNYIQSADK

**Total Number of Spectra:** 1

**Number of Replicates (out of 8):** 1

**Best Match Score:** 97.836

**Best Match Posterior Error Probability:** 0.00028316

**Best Match Spectrum:**

|                    |           |                  |                                   |
|--------------------|-----------|------------------|-----------------------------------|
| <b>Scan number</b> | 27808     | <b>Raw file</b>  | A549-US-WT-top20CID-Elite-2ug-B13 |
| <b>Method</b>      | ITMS; CID | <b>Genenames</b> | ABI2                              |

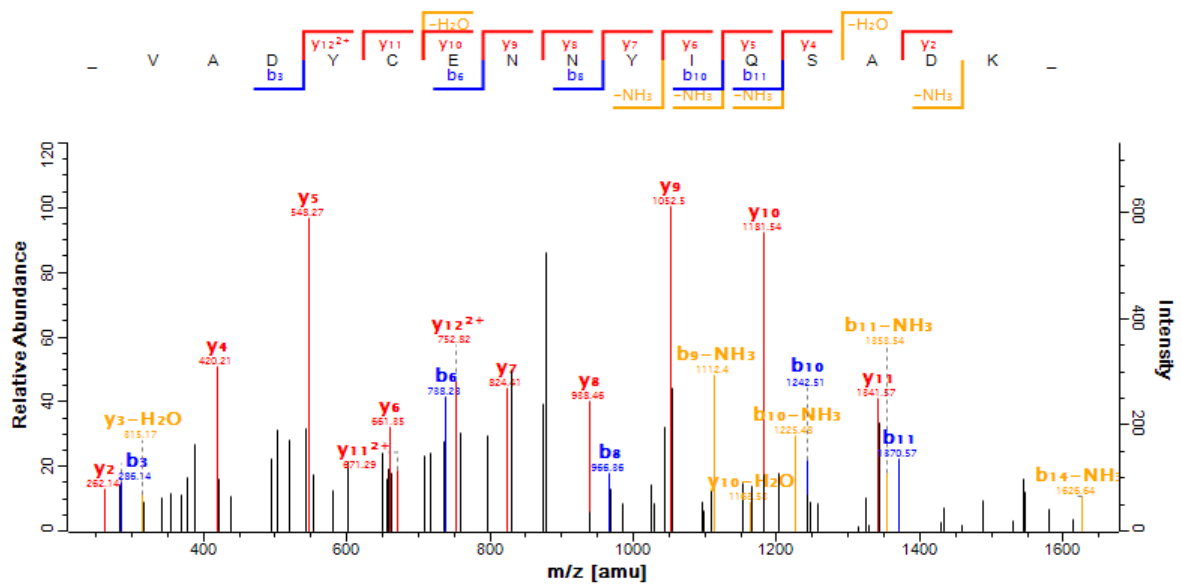

**Protein Group ID:** 765

**Protein Accession Numbers:** E7EPH8; J3KNL5; Q3KR37; Q3KR37-2; E9PRD6

**Gene Names:** GRAMD1B

**Peptide Sequence:** SPSTPEQGVQR

**Total Number of Spectra:** 3

**Number of Replicates (out of 8):** 3

**Best Match Score:** 94.767

**Best Match Posterior Error Probability:** 0.00098239

**Best Match Spectrum:**

**Scan number** 5048      **Raw file** A549-US-WT-top20CID-Elite-2ug-B14  
**Method** ITMS; CID      **Genenames** GRAMD1B

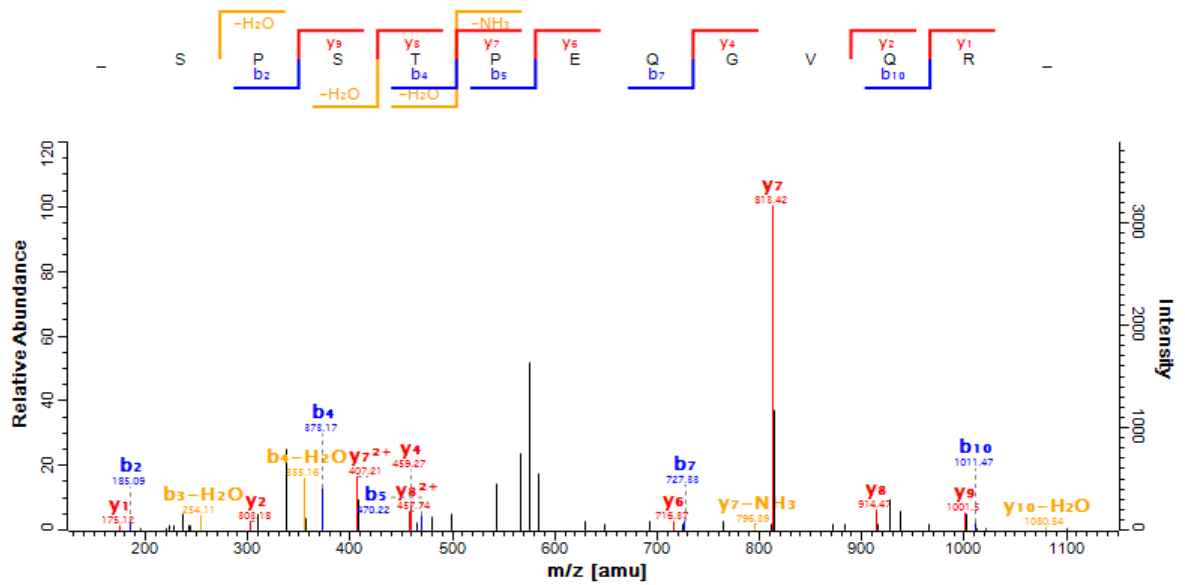



**Protein Group ID:** 779

**Protein Accession Numbers:** E7EQP8; F8W9Q9; Q96PV6-2; Q96PV6; E7EWC7

**Gene Names:** LENG8

**Peptide Sequence:** R P F A V T T Q S F G S N A E G Q H S G F G P Q P N P E K

**Total Number of Spectra:** 2

**Number of Replicates (out of 8):** 2

**Best Match Score:** 64.069

**Best Match Posterior Error Probability:** 0.00020283

**Best Match Spectrum:**

**Scan number** 38631      **Raw file** A549-US-Mock-top20CID-Elite-2ug-B13  
**Method** ITMS; CID      **Genenames** LENG8

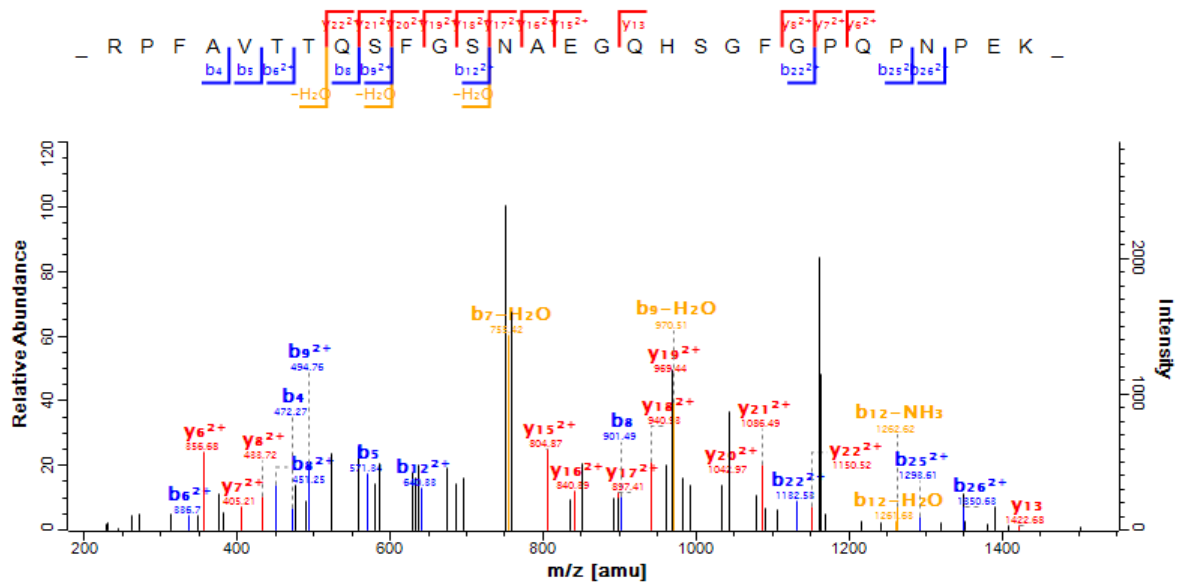

**Protein Group ID:** 792

**Protein Accession Numbers:** Q5R3I4; E7ES35; H7C089

**Gene Names:** TTC38

**Peptide Sequence:** DASESPGENCQHLLAR

**Total Number of Spectra:** 1

**Number of Replicates (out of 8):** 1

**Best Match Score:** 88.561

**Best Match Posterior Error Probability:** 0.0006397

**Best Match Spectrum:**

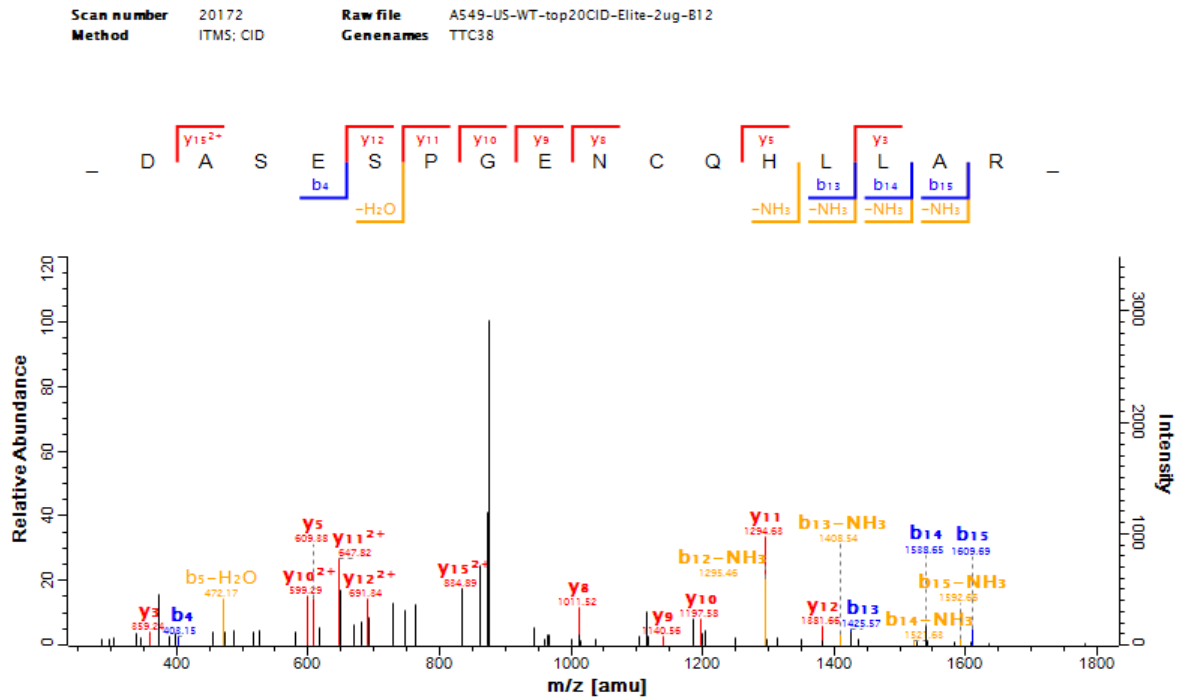

**Protein Group ID:** 794

**Protein Accession Numbers:** F2Z2Y1; O95677; O95677-4; E9PLN6; O95677-2; O95677-5; E7ESD5; O95677-3

**Gene Names:** EYA4

**Peptide Sequence:** TCTESDVSQSQNSR

**Total Number of Spectra:** 6

**Number of Replicates (out of 8):** 6

**Best Match Score:** 155.57

**Best Match Posterior Error Probability:** 2.78E-07

**Best Match Spectrum:**

**Scan number** 2822      **Raw file** A549-US-Mock-top20CID-Elite-2ug-B12  
**Method** ITMS: CID      **Genenames** EYA4

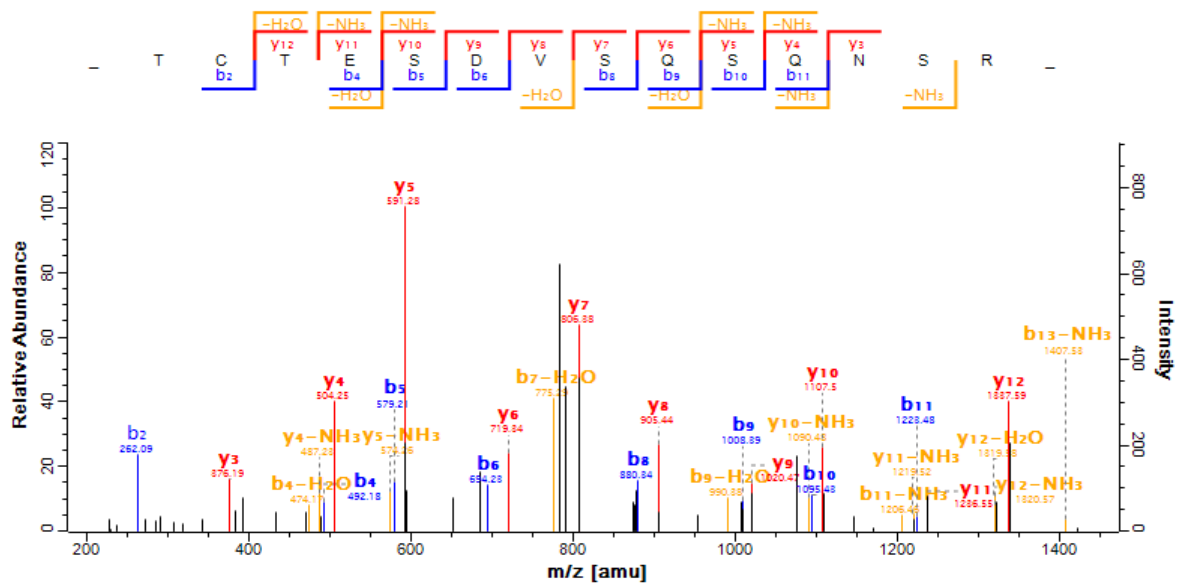

**Protein Group ID:** 796

**Protein Accession Numbers:** G3V5T9; P24941; P24941-2; E7ESI2

**Gene Names:** CDK2

**Peptide Sequence:** SYLFQLLQGLAFCHSR

**Total Number of Spectra:** 2

**Number of Replicates (out of 8):** 2

**Best Match Score:** 101.2

**Best Match Posterior Error Probability:** 0.00016455

**Best Match Spectrum:**

**Scan number** 86935      **Raw file** A549-US-WT-top20CID-Elite-2ug-B11  
**Method** ITMS; CID      **Genenames** CDK2

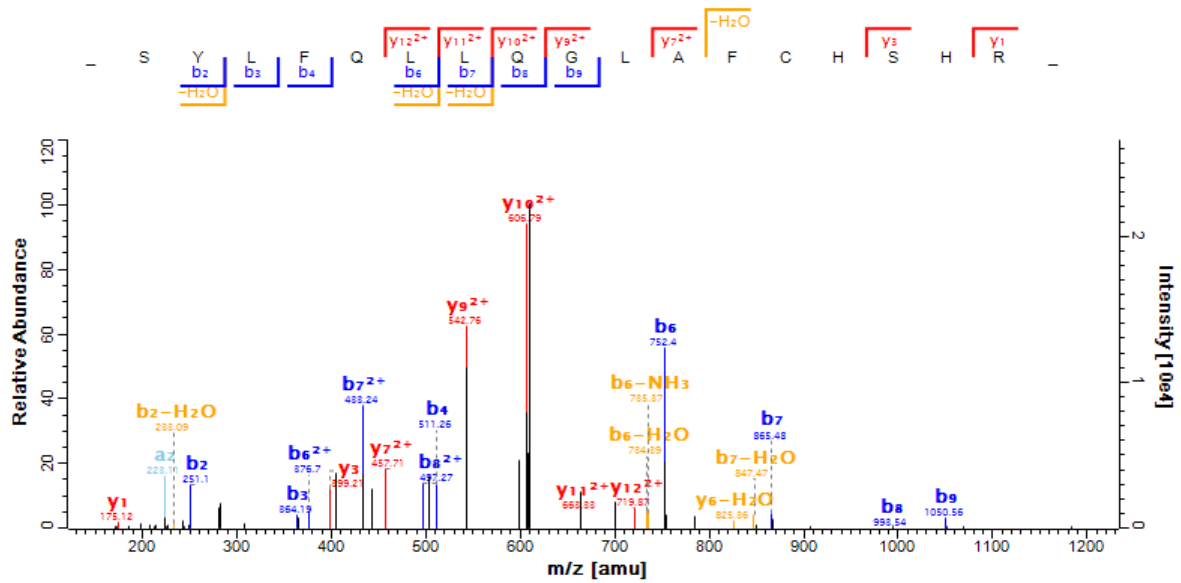

**Protein Group ID:** 806

**Protein Accession Numbers:** E7ETS8; Q07864; F5H1D6; F5H7H6

**Gene Names:** POLE

**Peptide Sequence:** AFHELSTREEQAK

**Total Number of Spectra:** 1

**Number of Replicates (out of 8):** 1

**Best Match Score:** 134.98

**Best Match Posterior Error Probability:** 0.00040035

**Best Match Spectrum:**

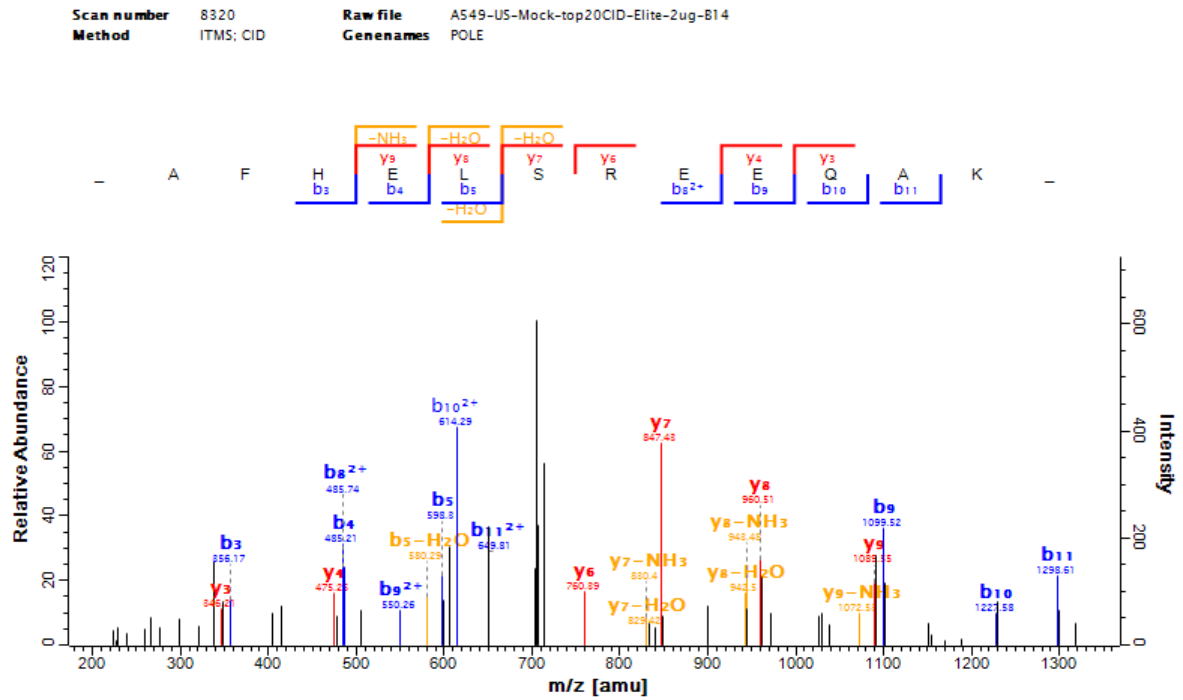

**Protein Group ID:** 813

**Protein Accession Numbers:** P13688; P13688-10; P13688-8; P13688-5; P13688-6; P13688-2; P13688-9; P13688-11; E7EUB1; P13688-4; P13688-3; P13688-7

**Gene Names:** CEACAM1

**Peptide Sequence:** EVLLVHNLPPQLFGYSWK

**Total Number of Spectra:** 1

**Number of Replicates (out of 8):** 1

**Best Match Score:** 73.918

**Best Match Posterior Error Probability:** 0.0011151

**Best Match Spectrum:**

**Scan number** 90226      **Raw file** A549-US-WT-top20CID-Elite-2ug-B12  
**Method** ITMS: CID      **Genenames** CEACAM1

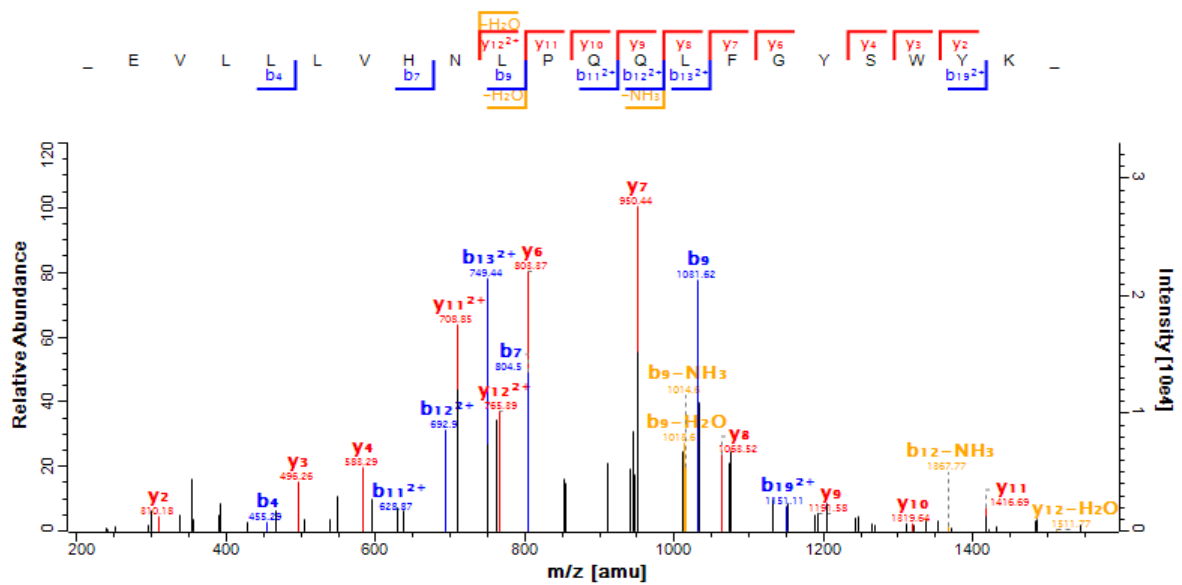

**Protein Group ID:** 818

**Protein Accession Numbers:** E7EUT7; P38571; P38571-2; Q5T073; Q5T770

**Gene Names:** LIPA

**Peptide Sequence:** TGQEQVYYVGHSGTITIGFIAFSQIPELAK

**Total Number of Spectra:** 2

**Number of Replicates (out of 8):** 2

**Best Match Score:** 71.085

**Best Match Posterior Error Probability:** 2.91E-05

**Best Match Spectrum:**

**Scan number** 80728      **Raw file** A549-US-WT-top20CID-Elite-2ug-B11  
**Method** ITMS; CID      **Genenames** LIPA

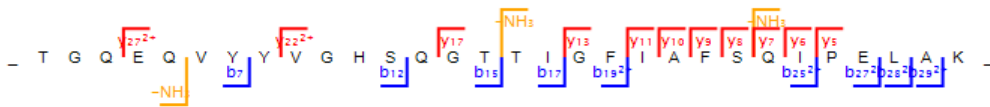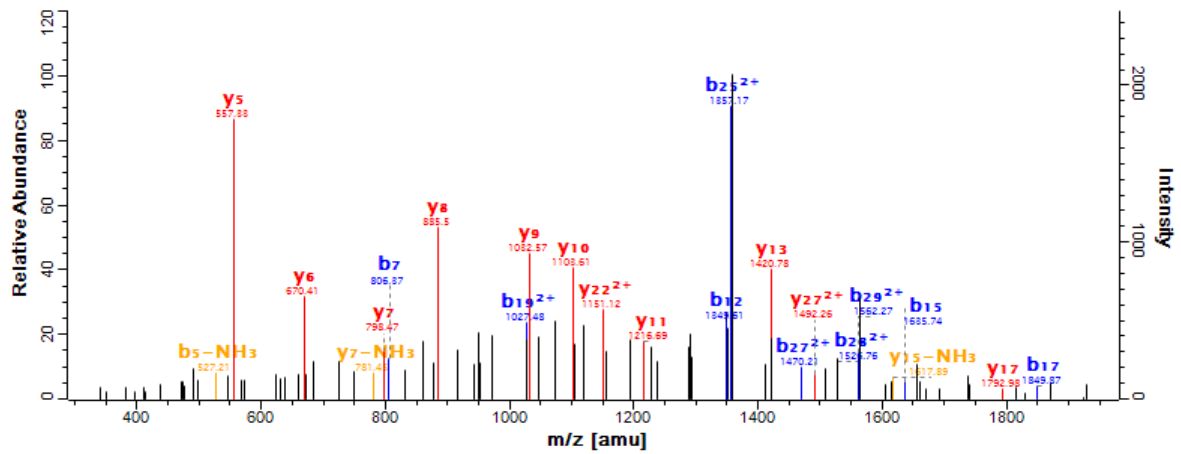

**Protein Group ID:** 825

**Protein Accession Numbers:** Q5VV67; Q5VV67-2; E7EVG6

**Gene Names:** PPRC1

**Peptide Sequence:** EGLSLNSEEK

**Total Number of Spectra:** 1

**Number of Replicates (out of 8):** 1

**Best Match Score:** 96.015

**Best Match Posterior Error Probability:** 0.0012035

**Best Match Spectrum:**

**Scan number** 17741      **Raw file** A549-US-WT-top20CID-Elite-2ug-B14  
**Method** ITMS; CID      **Genenames** PPRC1

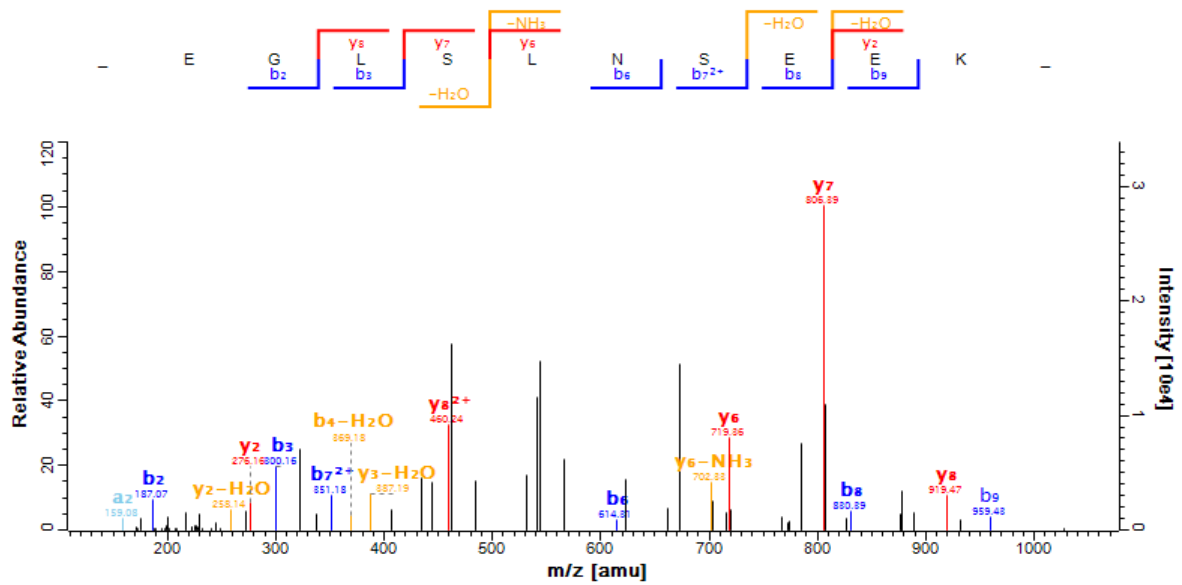



**Protein Group ID:** 826

**Protein Accession Numbers:** Q9H490; E7EVL4; Q9H490-2

**Gene Names:** PIGU

**Peptide Sequence:** LLELDQYAPDVAELIR

**Total Number of Spectra:** 12

**Number of Replicates (out of 8):** 8

**Best Match Score:** 203.59

**Best Match Posterior Error Probability:** 2.83E-39

**Best Match Spectrum:**

**Scan number** 88804      **Raw file** A549-US-Mock-top20CID-Elite-2ug-B12  
**Method** ITMS; CID      **Genenames** PIGU

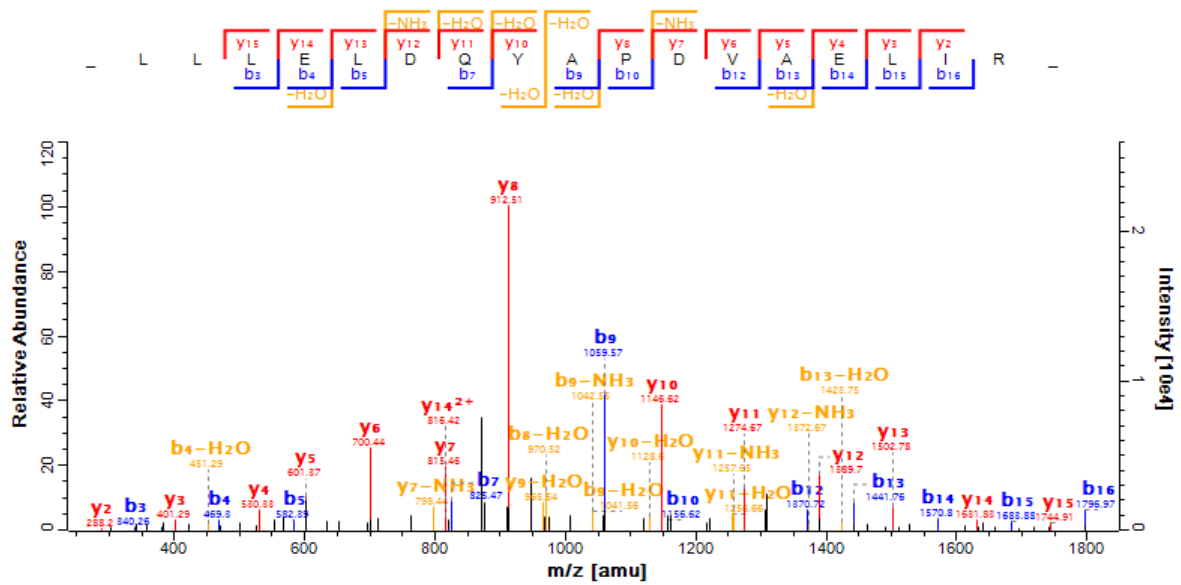

**Protein Group ID:** 832

**Protein Accession Numbers:** Q13576; E7EWC2; D6R939

**Gene Names:** IQGAP2

**Peptide Sequence:** IGGILANELSVDEAAALHAAVIAIINEAVEK

**Total Number of Spectra:** 11

**Number of Replicates (out of 8):** 8

**Best Match Score:** 120.54

**Best Match Posterior Error Probability:** 2.11E-14

**Best Match Spectrum:**

**Scan number** 94262      **Raw file** A549-US-Mock-top20CID-Elite-2ug-B13  
**Method** ITMS; CID      **Genenames** IQGAP2

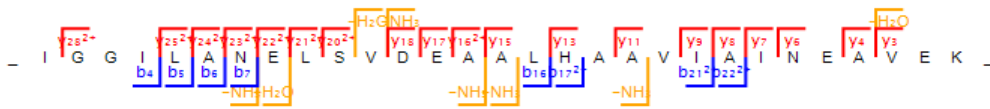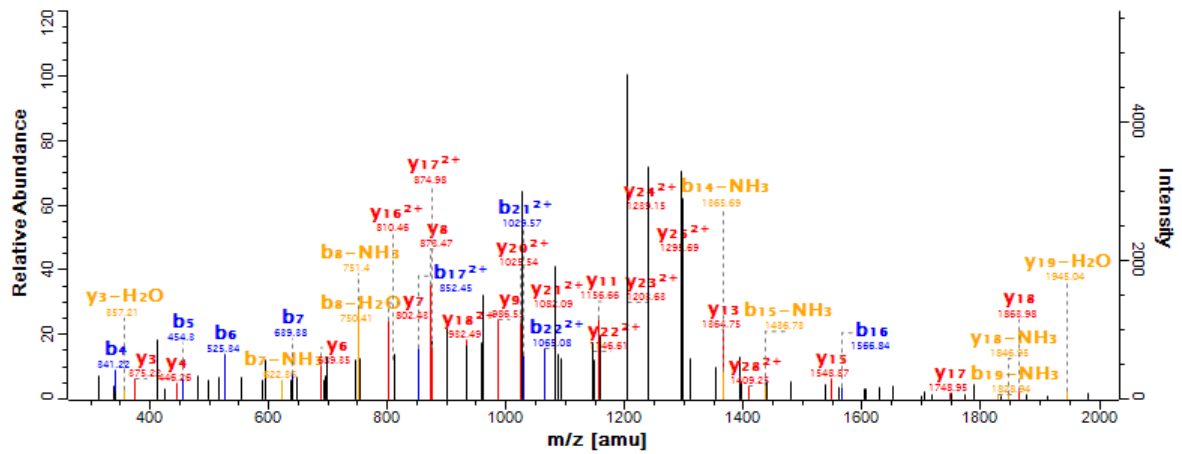

**Protein Group ID:** 833

**Protein Accession Numbers:** E7EWD9; O95718; O95718-2; O95718-3; P11474; P11474-2; HOYGT3

**Gene Names:** ESRRB;ESRRA

**Peptide Sequence:** LLLTLPLLR

**Total Number of Spectra:** 1

**Number of Replicates (out of 8):** 1

**Best Match Score:** 96.948

**Best Match Posterior Error Probability:** 0.0022423

**Best Match Spectrum:**

|                    |           |                  |                                     |
|--------------------|-----------|------------------|-------------------------------------|
| <b>Scan number</b> | 80587     | <b>Raw file</b>  | A549-US-Mock-top20CID-Elite-2ug-B14 |
| <b>Method</b>      | ITMS; CID | <b>Genenames</b> | ESRRB;ESRRA                         |

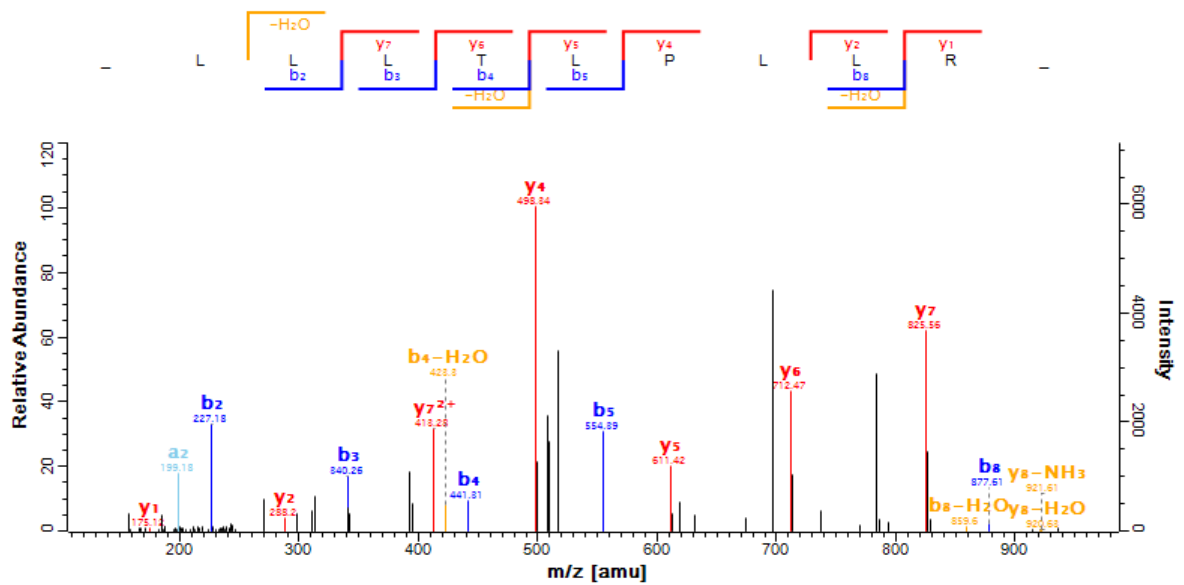

**Protein Group ID:** 836

**Protein Accession Numbers:** F8WAQ9; O15021; J3QT34; E7EWQ5; O15021-1; O15021-3; O15021-2; H7C1I9

**Gene Names:** MAST4

**Peptide Sequence:** SPGTVMESNPQQR

**Total Number of Spectra:** 1

**Number of Replicates (out of 8):** 1

**Best Match Score:** 107.53

**Best Match Posterior Error Probability:** 0.0025113

**Best Match Spectrum:**

**Scan number** 10646      **Raw file** A549-US-WT-top20CID-Elite-2ug-B13  
**Method** ITMS: CID      **Genenames** MAST4

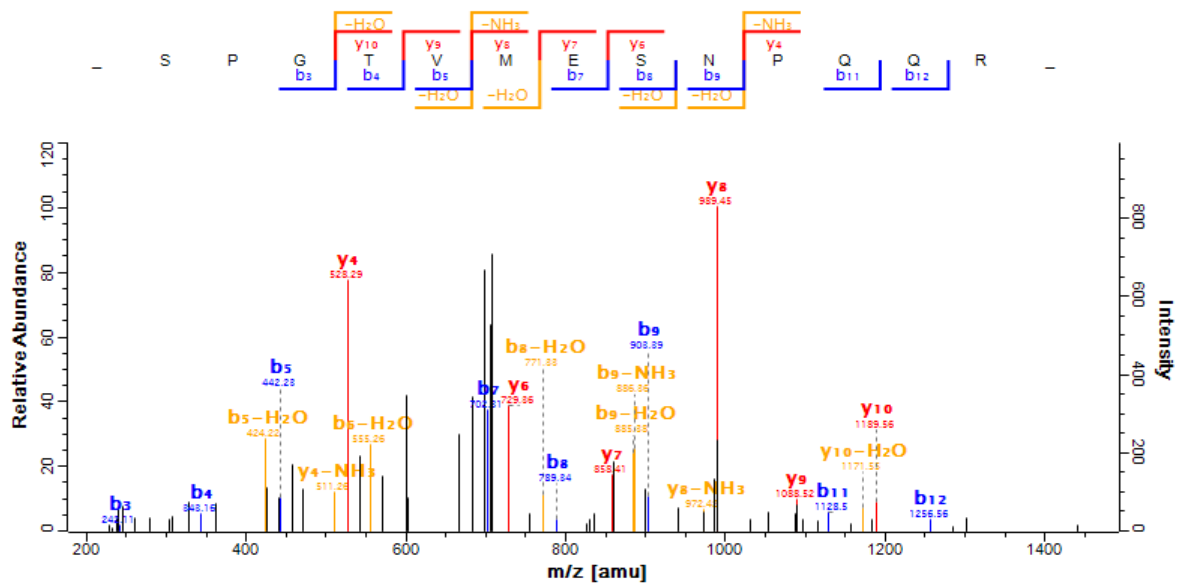

**Protein Group ID:** 837

**Protein Accession Numbers:** Q9UNS1; Q9UNS1-2; E7EWS5

**Gene Names:** TIMELESS

**Peptide Sequence:** SADFAEVLRL

**Total Number of Spectra:** 2

**Number of Replicates (out of 8):** 2

**Best Match Score:** 99.752

**Best Match Posterior Error Probability:** 0.00052505

**Best Match Spectrum:**

|                    |           |                  |                                     |
|--------------------|-----------|------------------|-------------------------------------|
| <b>Scan number</b> | 56221     | <b>Raw file</b>  | A549-US-Mock-top20CID-Elite-2ug-B14 |
| <b>Method</b>      | ITMS; CID | <b>Genenames</b> | TIMELESS                            |

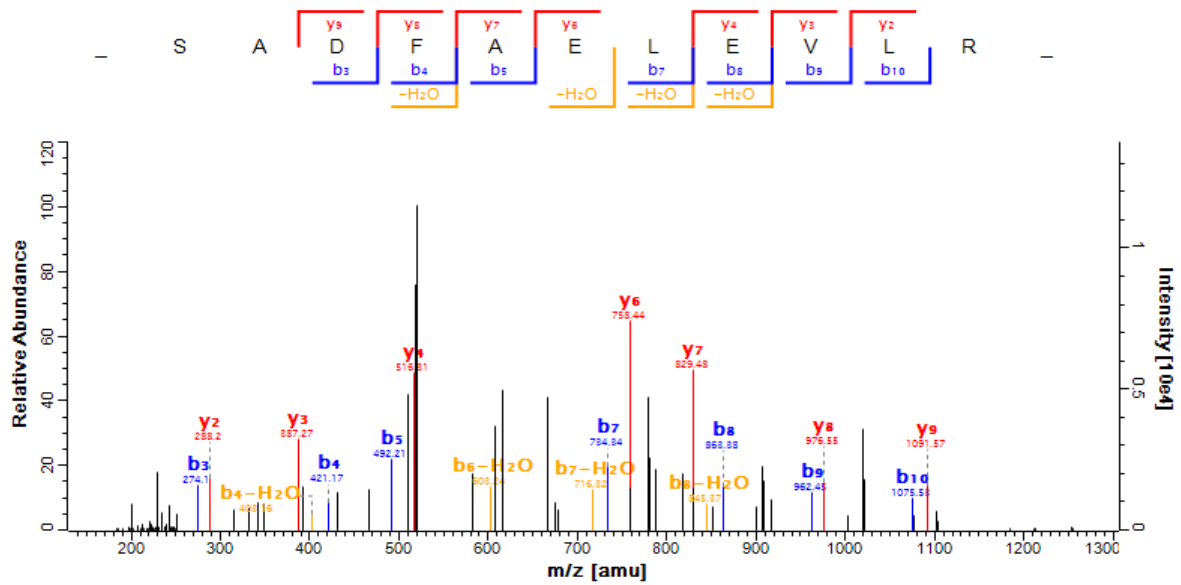

**Protein Group ID:** 841

**Protein Accession Numbers:** Q5QPH3; Q9NR19; E7EWU3

**Gene Names:** ACSS2

**Peptide Sequence:** IGPIATPDYIQNAPGLPK

**Total Number of Spectra:** 9

**Number of Replicates (out of 8):** 7

**Best Match Score:** 159.18

**Best Match Posterior Error Probability:** 7.86E-10

**Best Match Spectrum:**

**Scan number** 57542      **Raw file** A549-US-Mock-top20CID-Elite-2ug-B12  
**Method** ITMS; CID      **Genenames** ACSS2

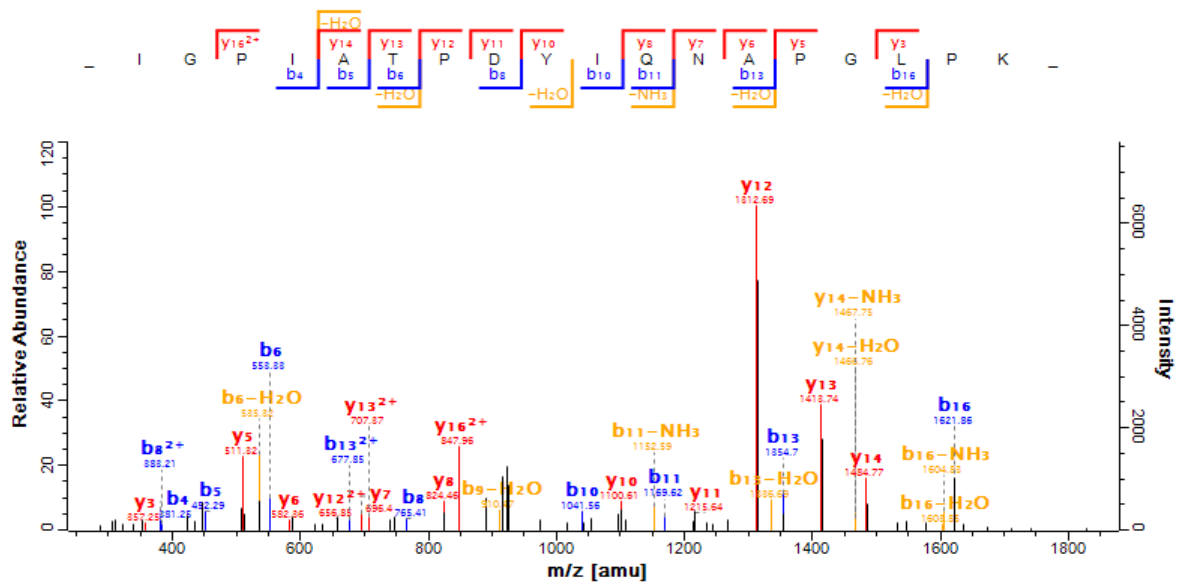

**Protein Group ID:** 856

**Protein Accession Numbers:** O43516-3; O43516; O43516-2; E9PB87

**Gene Names:** WIPF1

**Peptide Sequence:** NLSLSSSTPPLPSPGR

**Total Number of Spectra:** 1

**Number of Replicates (out of 8):** 1

**Best Match Score:** 77.191

**Best Match Posterior Error Probability:** 0.0025577

**Best Match Spectrum:**

**Scan number** 45390      **Raw file** A549-US-WT-top20CID-Elite-2ug-B12  
**Method** ITMS; CID      **Genenames** WIPF1

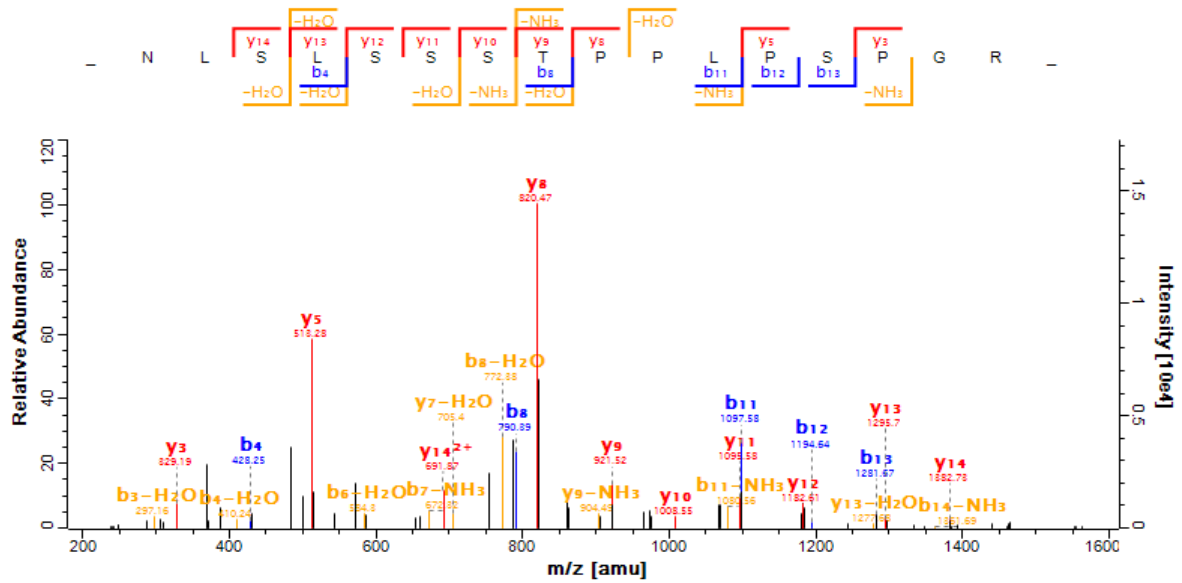

**Protein Group ID:** 857  
**Protein Accession Numbers:** O15514; E9PB93  
**Gene Names:** POLR2D  
**Peptide Sequence:** ALIPSLEGRFEDELQQLIDDIQTK  
**Total Number of Spectra:** 1  
**Number of Replicates (out of 8):** 1  
**Best Match Score:** 135.21  
**Best Match Posterior Error Probability:** 7.12E-16  
**Best Match Spectrum:**

**Scan number** 87286      **Raw file** A549-US-Mock-top20CID-Elite-2ug-B11  
**Method** ITMS; CID      **Genenames** POLR2D

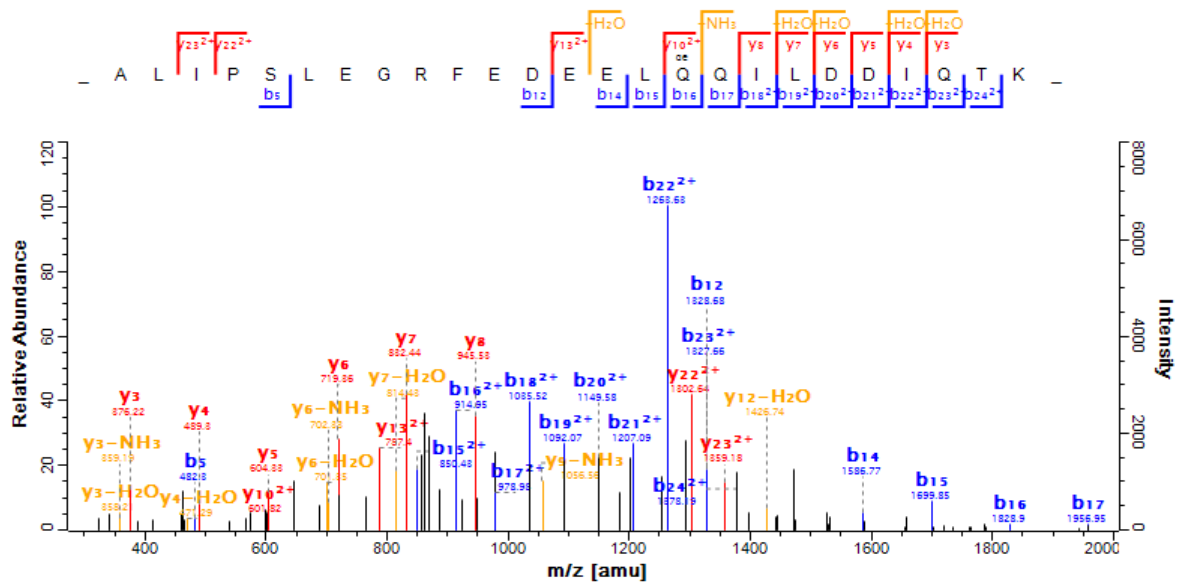



**Protein Group ID:** 859

**Protein Accession Numbers:** Q5SNT2; E9PBR6; Q5SNT2-2

**Gene Names:** TMEM201

**Peptide Sequence:** MEGVSALLAR

**Total Number of Spectra:** 4

**Number of Replicates (out of 8):** 4

**Best Match Score:** 119.16

**Best Match Posterior Error Probability:** 0.0002032

**Best Match Spectrum:**

**Scan number** 68842      **Raw file** A549-US-Mock-top20CID-Elite-2ug-B12  
**Method** ITMS; CID      **Genenames** TMEM201

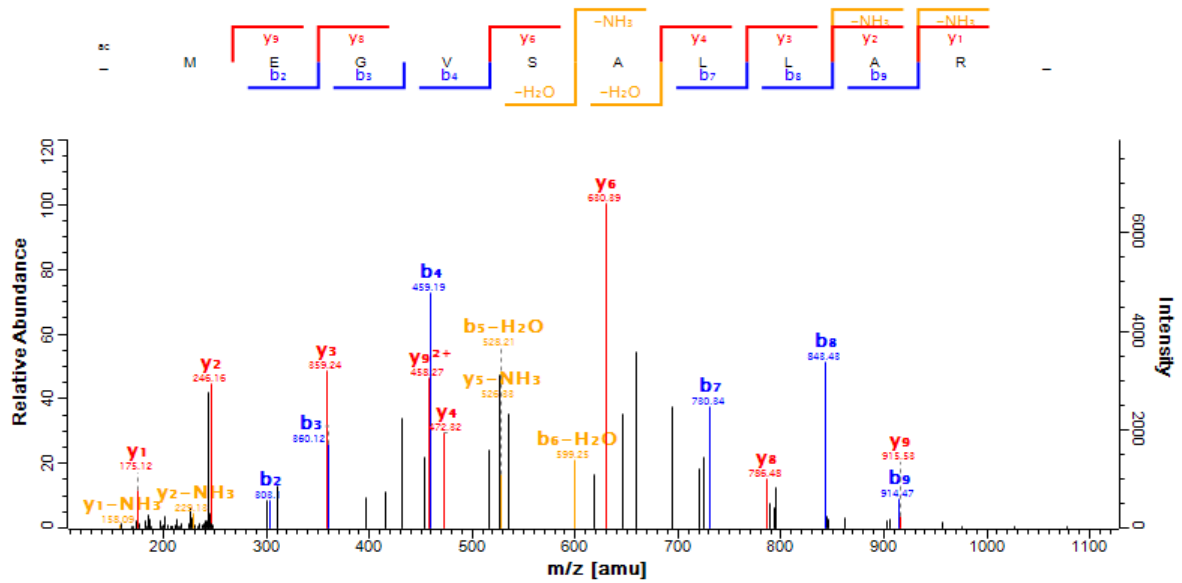

**Protein Group ID:** 860  
**Protein Accession Numbers:** O75891; E9PBX3  
**Gene Names:** ALDH1L1  
**Peptide Sequence:** IGFTGSTEVGK  
**Total Number of Spectra:** 2  
**Number of Replicates (out of 8):** 2  
**Best Match Score:** 117.52  
**Best Match Posterior Error Probability:** 8.28E-05  
**Best Match Spectrum:**

**Scan number** 18249      **Raw file** A549-US-WT-top20CID-Elite-2ug-B11  
**Method** ITMS; CID      **Genenames** ALDH1L1

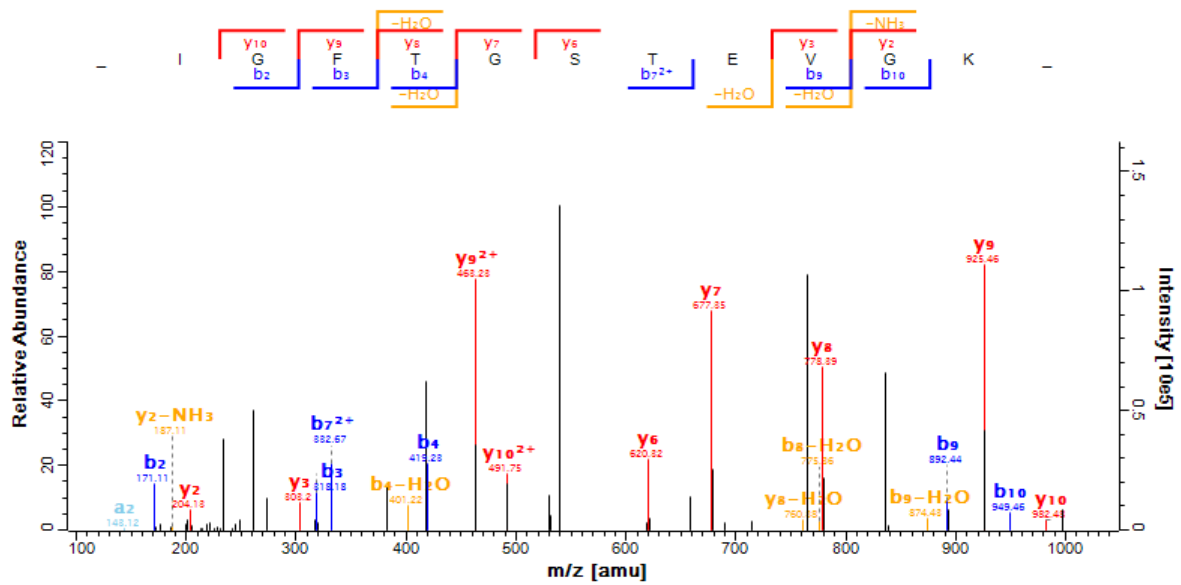

**Protein Group ID:** 863  
**Protein Accession Numbers:** P27701; E9PC70  
**Gene Names:** CD82  
**Peptide Sequence:** GEEDNSLSVR  
**Total Number of Spectra:** 1  
**Number of Replicates (out of 8):** 1  
**Best Match Score:** 111.86  
**Best Match Posterior Error Probability:** 0.00029194  
**Best Match Spectrum:**

**Scan number** 10143      **Raw file** A549-US-WT-top20CID-Elite-2ug-B11  
**Method** ITMS; CID      **Genenames** CD82

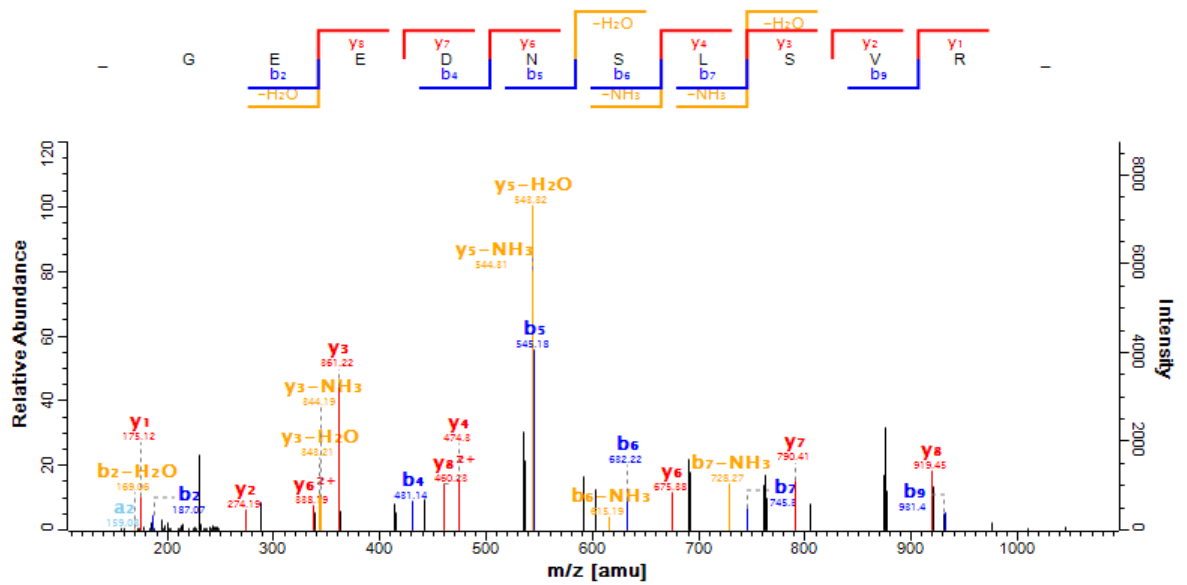

**Protein Group ID:** 872

**Protein Accession Numbers:** P37275-2; P37275; E9PCM7; Q5VZ84; F5H4I8; G3V1R3

**Gene Names:** ZEB1

**Peptide Sequence:** VGESSEQVSEEK

**Total Number of Spectra:** 5

**Number of Replicates (out of 8):** 5

**Best Match Score:** 184.34

**Best Match Posterior Error Probability:** 4.10E-13

**Best Match Spectrum:**

**Scan number** 4614      **Raw file** A549-US-WT-top20CID-Elite-2ug-B12  
**Method** ITMS; CID      **Genenames** ZEB1

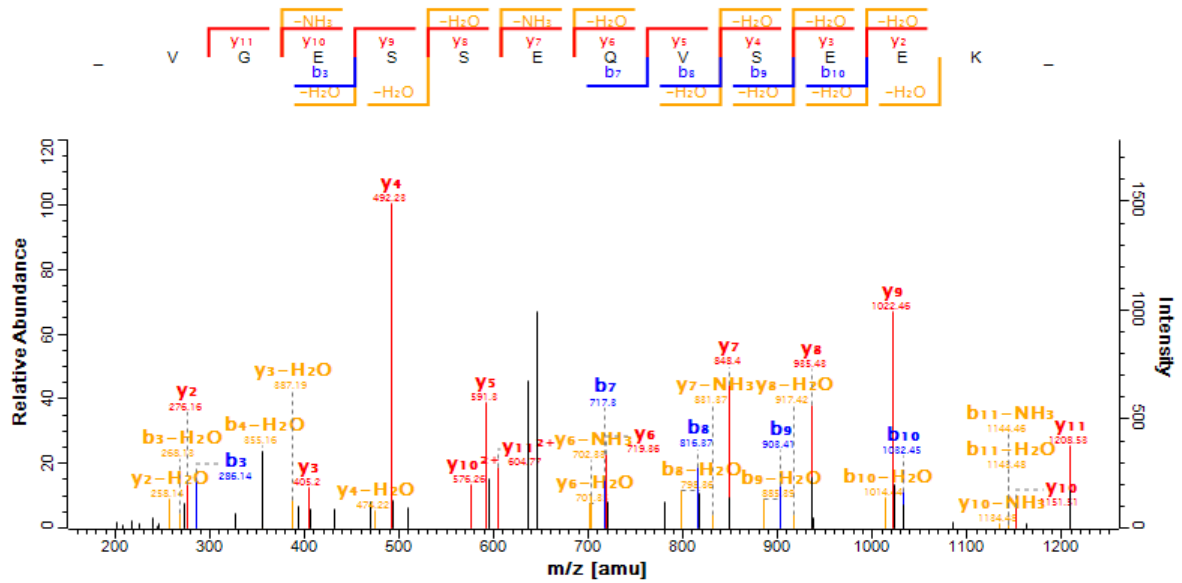

**Protein Group ID:** 873

**Protein Accession Numbers:** P51636; P51636-2; E9PCT3

**Gene Names:** CAV2

**Peptide Sequence:** LGFEDVIAEPVTTHSFDK

**Total Number of Spectra:** 6

**Number of Replicates (out of 8):** 6

**Best Match Score:** 93.909

**Best Match Posterior Error Probability:** 0.00028903

**Best Match Spectrum:**

**Scan number** 59799      **Raw file** A549-US-Mock-top20CID-Elite-2ug-B12  
**Method** ITMS; CID      **Genenames** CAV2

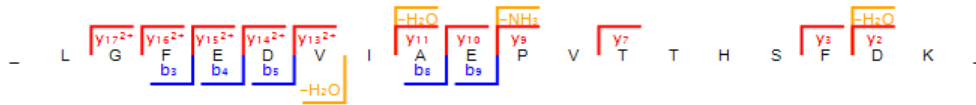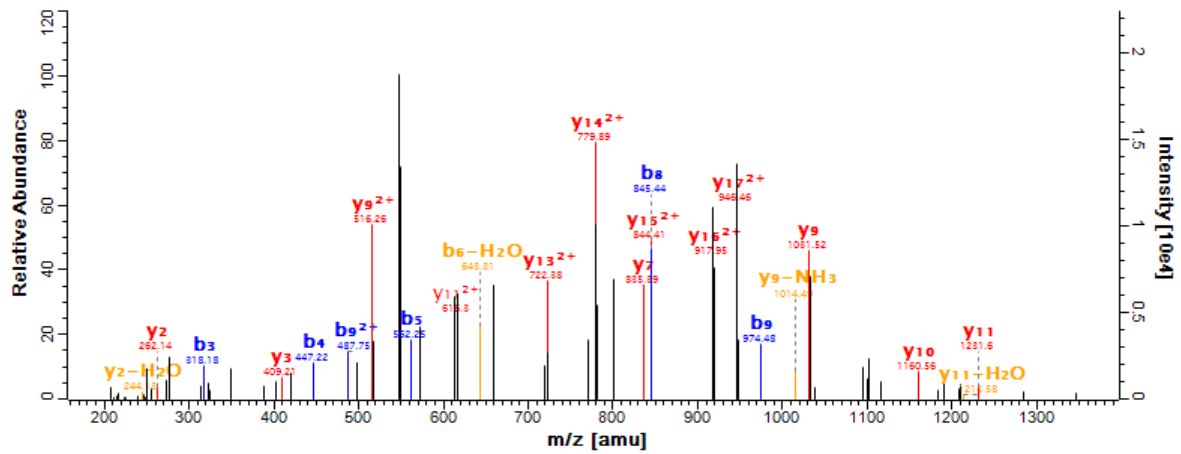

**Protein Group ID:** 876  
**Protein Accession Numbers:** P61962; E9PCY4  
**Gene Names:** DCAF7  
**Peptide Sequence:** GVYPDLLATSGDYLR  
**Total Number of Spectra:** 10  
**Number of Replicates (out of 8):** 8  
**Best Match Score:** 171.26  
**Best Match Posterior Error Probability:** 4.33E-14  
**Best Match Spectrum:**

**Scan number** 64049      **Raw file** A549-US-Mock-top20CID-Elite-2ug-B12  
**Method** ITMS; CID      **Genenames** DCAF7

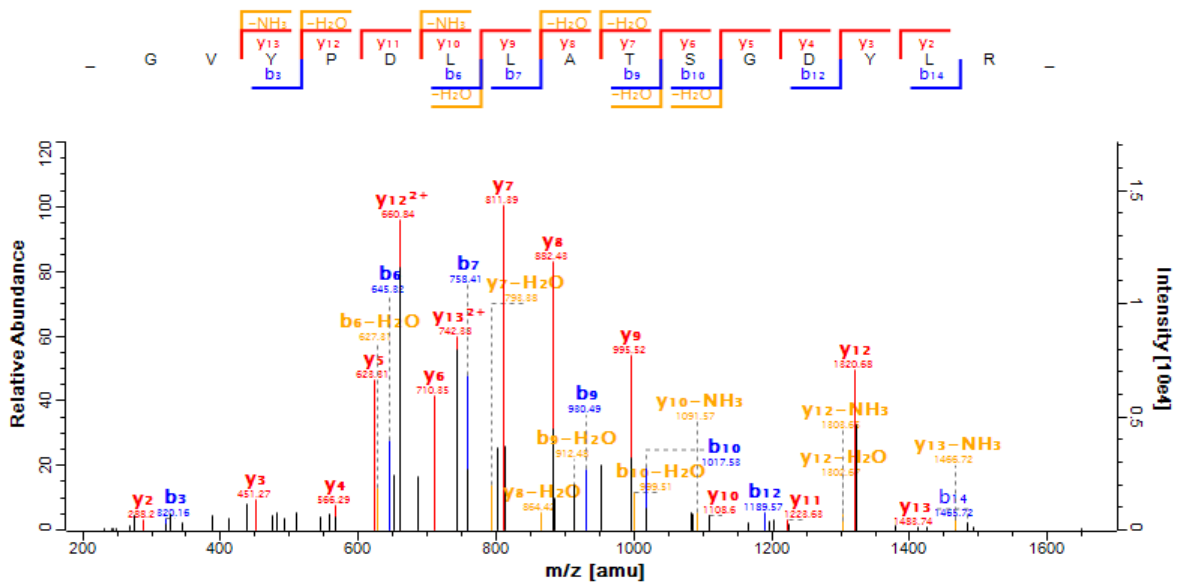

**Protein Group ID:** 877

**Protein Accession Numbers:** H0YL70; H0YKN8; H0YKT5; Q04726; Q04726-4; E9PD64; Q6PI57; F8W8S3; Q04726-3; F8W964; Q04726-2; H0YNT2; F5H7D6; H0YLI3; H0YWL9; H0YKH0

**Gene Names:** TLE3

**Peptide Sequence:** NDAPTPGTSTTPGLR

**Total Number of Spectra:** 7

**Number of Replicates (out of 8):** 7

**Best Match Score:** 170.11

**Best Match Posterior Error Probability:** 4.90E-14

**Best Match Spectrum:**

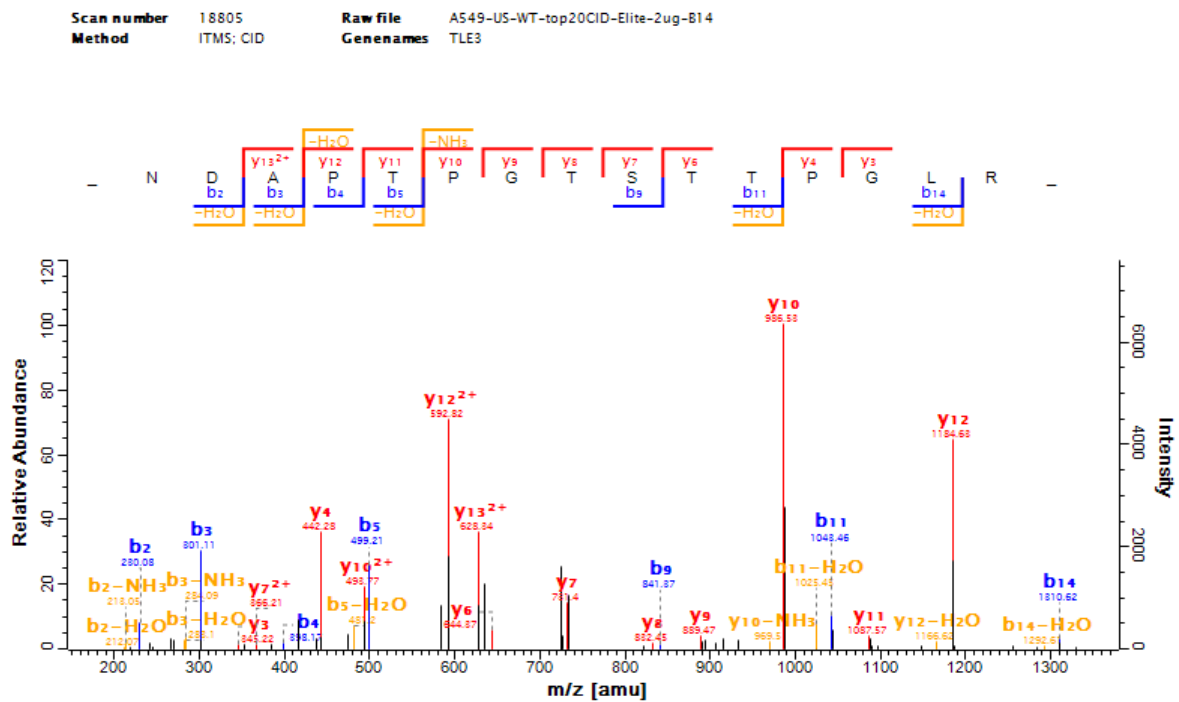

**Protein Group ID:** 883

**Protein Accession Numbers:** H3BNE9; Q9H1H9; E9PDX3; Q9H1H9-2; Q9H1H9-4; Q9H1H9-3; H0Y307

**Gene Names:** KIF13A

**Peptide Sequence:** LAYSSQTAQQK

**Total Number of Spectra:** 5

**Number of Replicates (out of 8):** 5

**Best Match Score:** 129.34

**Best Match Posterior Error Probability:** 4.24E-05

**Best Match Spectrum:**

|                    |           |                  |                                   |
|--------------------|-----------|------------------|-----------------------------------|
| <b>Scan number</b> | 5792      | <b>Raw file</b>  | A549-US-WT-top20CID-Elite-2ug-B11 |
| <b>Method</b>      | ITMS: CID | <b>Genenames</b> | KIF13A                            |

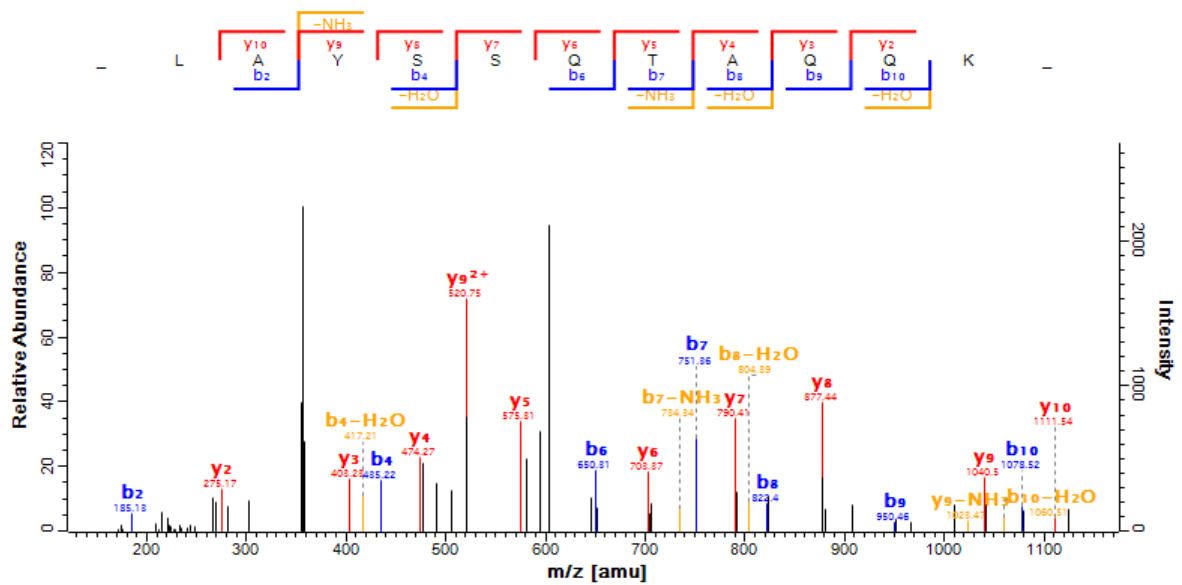



**Protein Group ID:** 888  
**Protein Accession Numbers:** Q69YH5; E9PEI0  
**Gene Names:** CDCA2  
**Peptide Sequence:** SPLAQDSPSQGSPALYR  
**Total Number of Spectra:** 6  
**Number of Replicates (out of 8):** 4  
**Best Match Score:** 182.31  
**Best Match Posterior Error Probability:** 9.45E-21  
**Best Match Spectrum:**

**Scan number** 30432      **Raw file** A549-US-Mock-top20CID-Elite-2ug-B14  
**Method** ITMS; CID      **Genenames** CDCA2

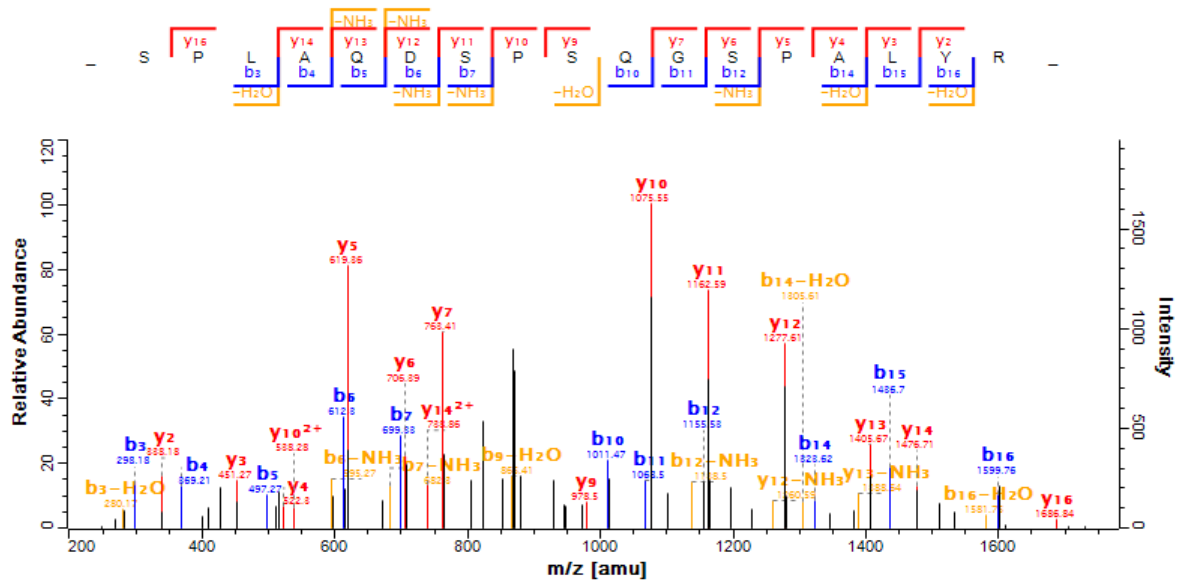

**Protein Group ID:** 897

**Protein Accession Numbers:** F5GXA0; Q8NBK3-3; Q8NBK3; E9PGL0; G5E9B0; E9PF05

**Gene Names:** SUMF1

**Peptide Sequence:** EANAPGPVPGER

**Total Number of Spectra:** 1

**Number of Replicates (out of 8):** 1

**Best Match Score:** 86.772

**Best Match Posterior Error Probability:** 0.0018203

**Best Match Spectrum:**

|                    |           |                  |                                     |
|--------------------|-----------|------------------|-------------------------------------|
| <b>Scan number</b> | 10437     | <b>Raw file</b>  | A549-US-Mock-top20CID-Elite-2ug-B11 |
| <b>Method</b>      | ITMS; CID | <b>Genenames</b> | SUMF1                               |

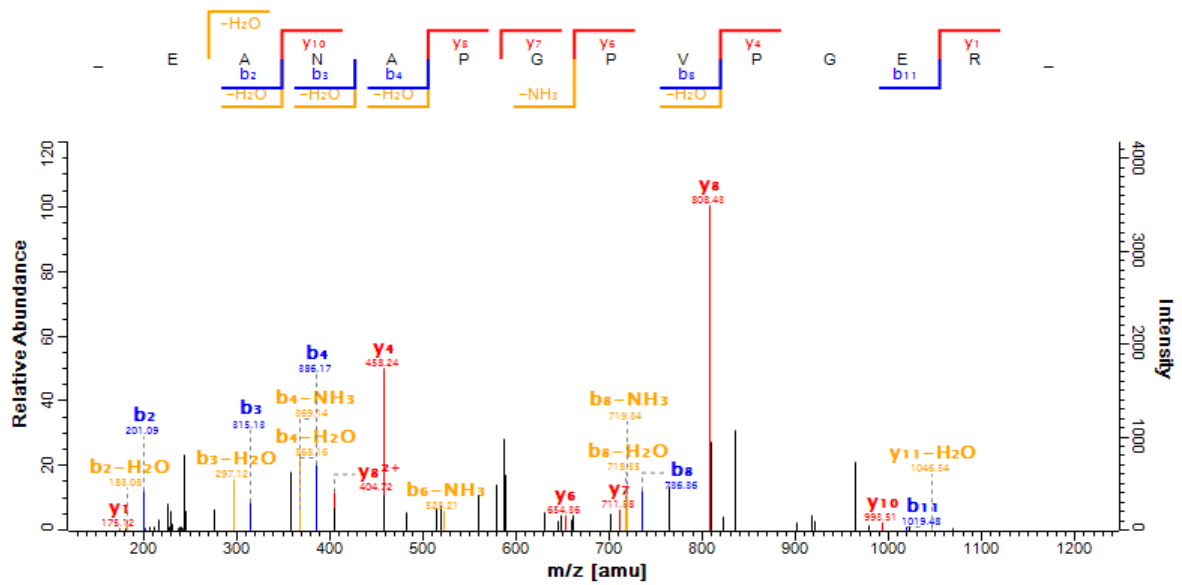

**Protein Group ID:** 899

**Protein Accession Numbers:** P49754; E9PF36; P49754-2

**Gene Names:** VPS41

**Peptide Sequence:** ILDIGLAYINHLVER

**Total Number of Spectra:** 4

**Number of Replicates (out of 8):** 3

**Best Match Score:** 92.856

**Best Match Posterior Error Probability:** 0.00062416

**Best Match Spectrum:**

|                    |           |                  |                                   |
|--------------------|-----------|------------------|-----------------------------------|
| <b>Scan number</b> | 79397     | <b>Raw file</b>  | A549-US-WT-top20CID-Elite-2ug-B13 |
| <b>Method</b>      | ITMS; CID | <b>Genenames</b> | VPS41                             |

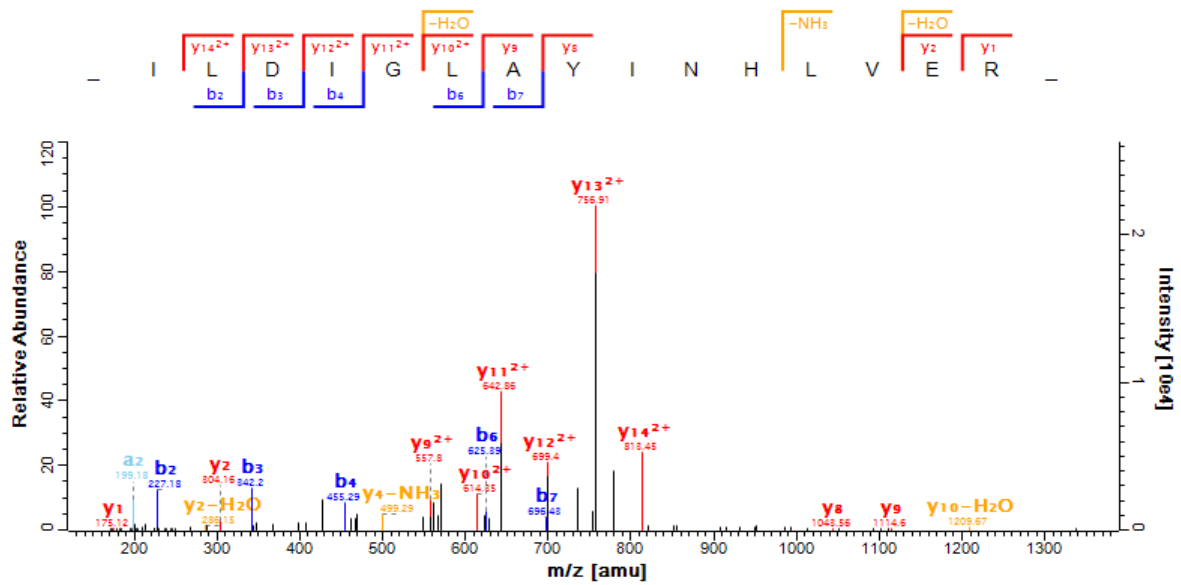

**Protein Group ID:** 905

**Protein Accession Numbers:** P25054; P25054-2; E9PFT7

**Gene Names:** APC

**Peptide Sequence:** TEHMSSSSSENTSTPSSNAK

**Total Number of Spectra:** 5

**Number of Replicates (out of 8):** 5

**Best Match Score:** 90.385

**Best Match Posterior Error Probability:** 0.00028065

**Best Match Spectrum:**

**Scan number** 3167      **Raw file** A549-US-WT-top20CID-Elite-2ug-B11  
**Method** ITMS; CID      **Genenames** APC

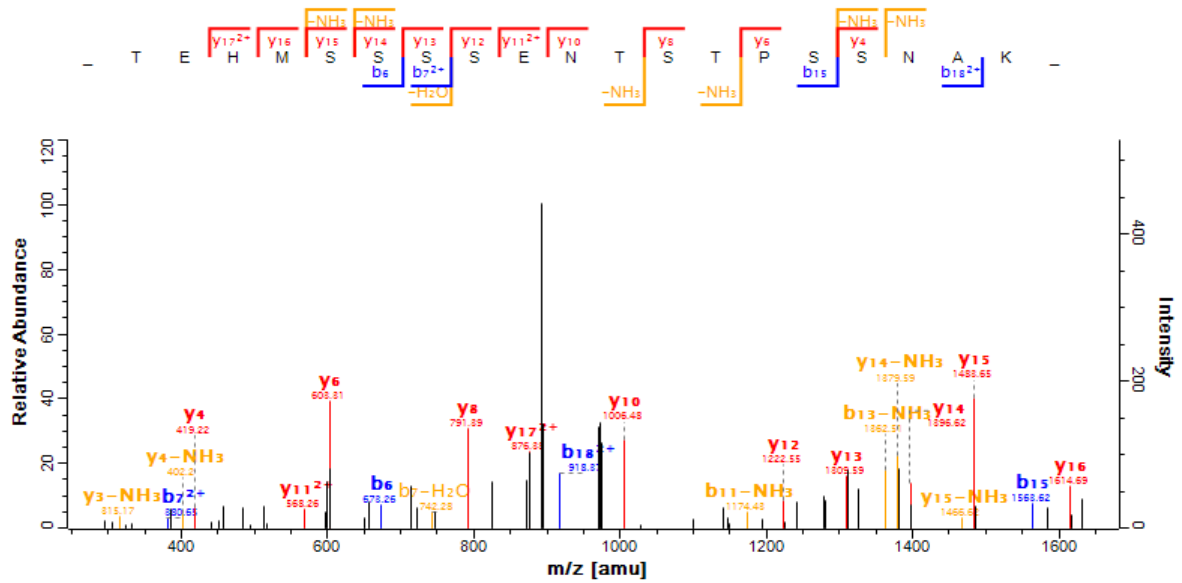

**Protein Group ID:** 909

**Protein Accession Numbers:** Q6P4A7; E9PGB5; Q6P4A7-2

**Gene Names:** SFXN4

**Peptide Sequence:** LFRPAAFLPFMAPTVFLSMTPLK

**Total Number of Spectra:** 2

**Number of Replicates (out of 8):** 2

**Best Match Score:** 108.71

**Best Match Posterior Error Probability:** 2.36E-06

**Best Match Spectrum:**

**Scan number** 94009      **Raw file** A549-US-Mock-top20CID-Elite-2ug-B13  
**Method** ITMS; CID      **Genenames** SFXN4

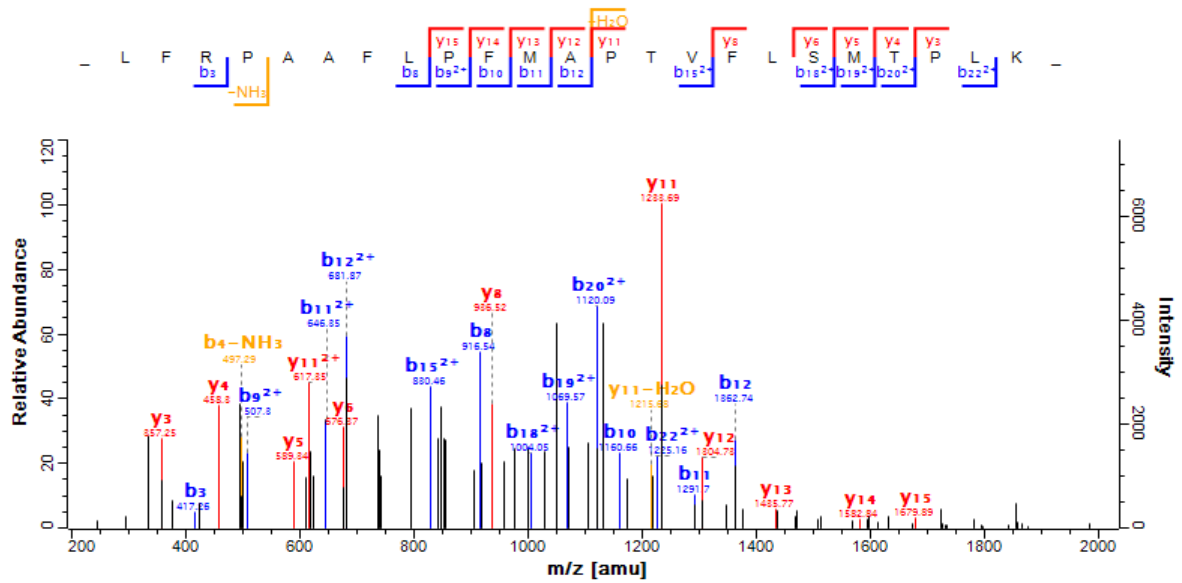

**Protein Group ID:** 910  
**Protein Accession Numbers:** Q96CB8; E9PGI3  
**Gene Names:** INTS12  
**Peptide Sequence:** LEKPETQSSPITVQSSK  
**Total Number of Spectra:** 2  
**Number of Replicates (out of 8):** 2  
**Best Match Score:** 123.4  
**Best Match Posterior Error Probability:** 0.00053732  
**Best Match Spectrum:**

**Scan number** 19504      **Raw file** A549-US-Mock-top20CID-Elite-2ug-B12  
**Method** ITMS; CID      **Genenames** INTS12

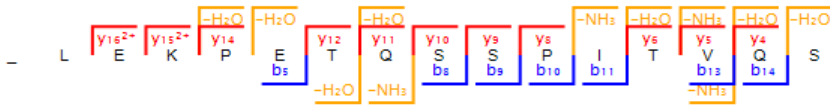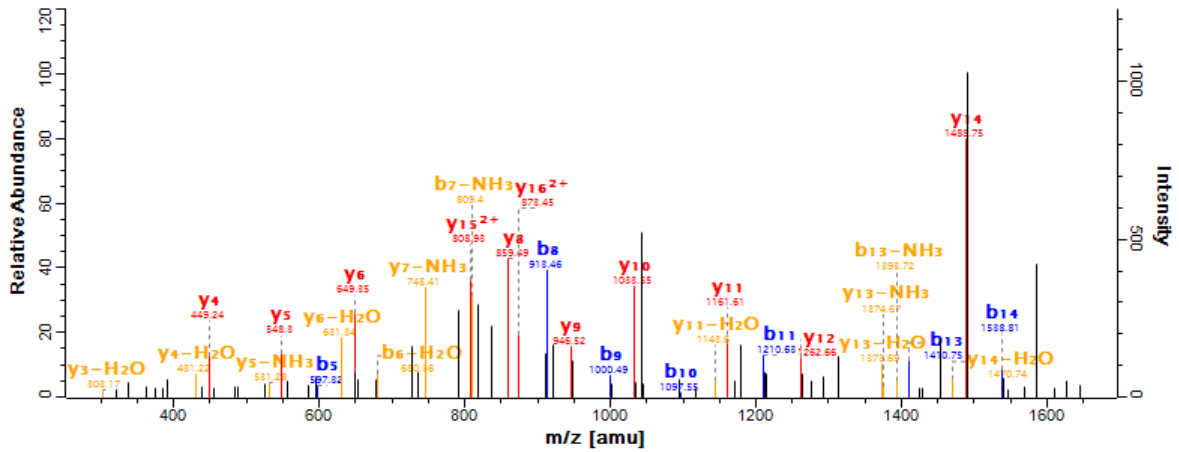

**Protein Group ID:** 912

**Protein Accession Numbers:** Q96RU3; Q96RU3-2; E9PGQ4; Q96RU3-3; H0Y7W6; Q96RU3-4

**Gene Names:** FNBP1

**Peptide Sequence:** SGFEPPGDIEFEDYTQPMK

**Total Number of Spectra:** 2

**Number of Replicates (out of 8):** 1

**Best Match Score:** 106.57

**Best Match Posterior Error Probability:** 7.12E-05

**Best Match Spectrum:**

**Scan number** 61315      **Raw file** A549-US-Mock-top20CID-Elite-2ug-B13  
**Method** ITMS; CID      **Genenames** FNBP1

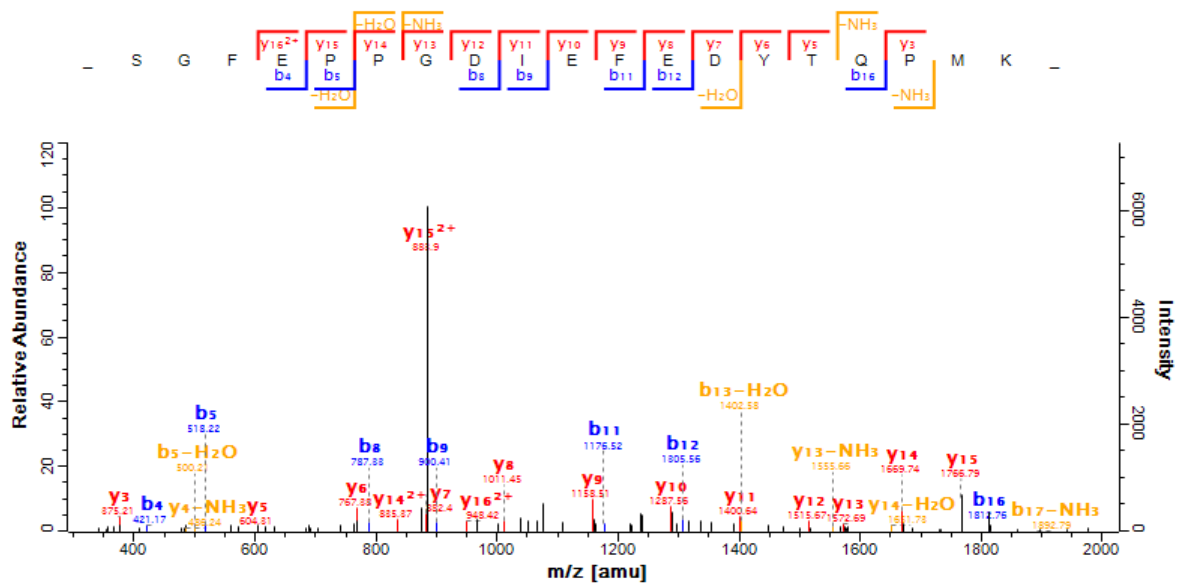

**Protein Group ID:** 915

**Protein Accession Numbers:** Q15418-2; Q15418; E9PGT3; E9PRI4; Q15418-3

**Gene Names:** RPS6KA1

**Peptide Sequence:** LGMPQFLSTEAQSLLR

**Total Number of Spectra:** 6

**Number of Replicates (out of 8):** 5

**Best Match Score:** 122.63

**Best Match Posterior Error Probability:** 8.01E-05

**Best Match Spectrum:**

|                    |           |                  |                                   |
|--------------------|-----------|------------------|-----------------------------------|
| <b>Scan number</b> | 86104     | <b>Raw file</b>  | A549-US-WT-top20CID-Elite-2ug-B11 |
| <b>Method</b>      | ITMS; CID | <b>Genenames</b> | RPS6KA1                           |

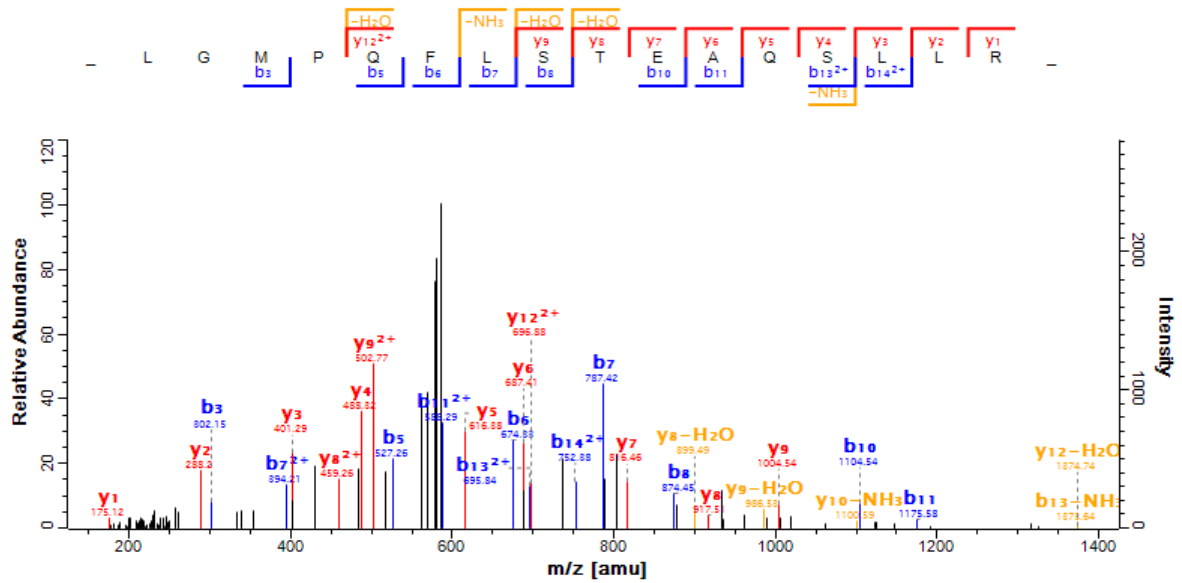



**Protein Group ID:** 922  
**Protein Accession Numbers:** Q01831; E9PH69  
**Gene Names:** XPC  
**Peptide Sequence:** ILAASWPQNREDEEK  
**Total Number of Spectra:** 5  
**Number of Replicates (out of 8):** 5  
**Best Match Score:** 149.3  
**Best Match Posterior Error Probability:** 4.34E-06  
**Best Match Spectrum:**

**Scan number** 28535      **Raw file** A549-US-Mock-top20CID-Elite-2ug-B12  
**Method** ITMS; CID      **Genenames** XPC

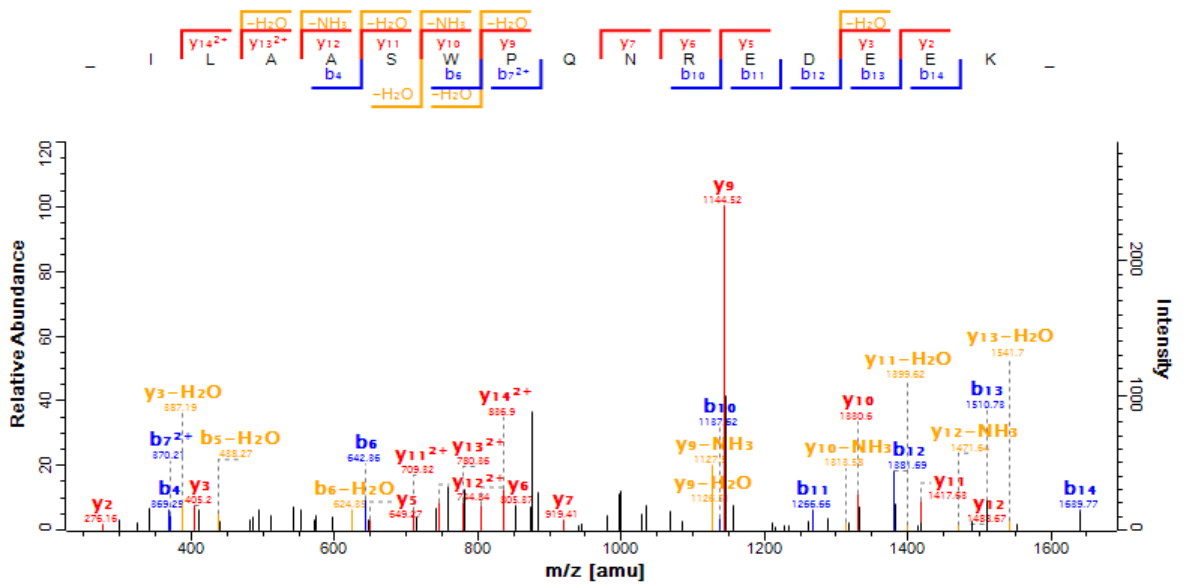

**Protein Group ID:** 927

**Protein Accession Numbers:** Q9UPV0; Q9UPV0-2; E9PI34

**Gene Names:** CEP164

**Peptide Sequence:** EHTLLQSNQQLR

**Total Number of Spectra:** 2

**Number of Replicates (out of 8):** 2

**Best Match Score:** 92.247

**Best Match Posterior Error Probability:** 0.0011802

**Best Match Spectrum:**

|                    |           |                  |                                     |
|--------------------|-----------|------------------|-------------------------------------|
| <b>Scan number</b> | 92676     | <b>Raw file</b>  | A549-US-Mock-top20CID-Elite-2ug-B14 |
| <b>Method</b>      | ITMS; CID | <b>Genenames</b> | CEP164                              |

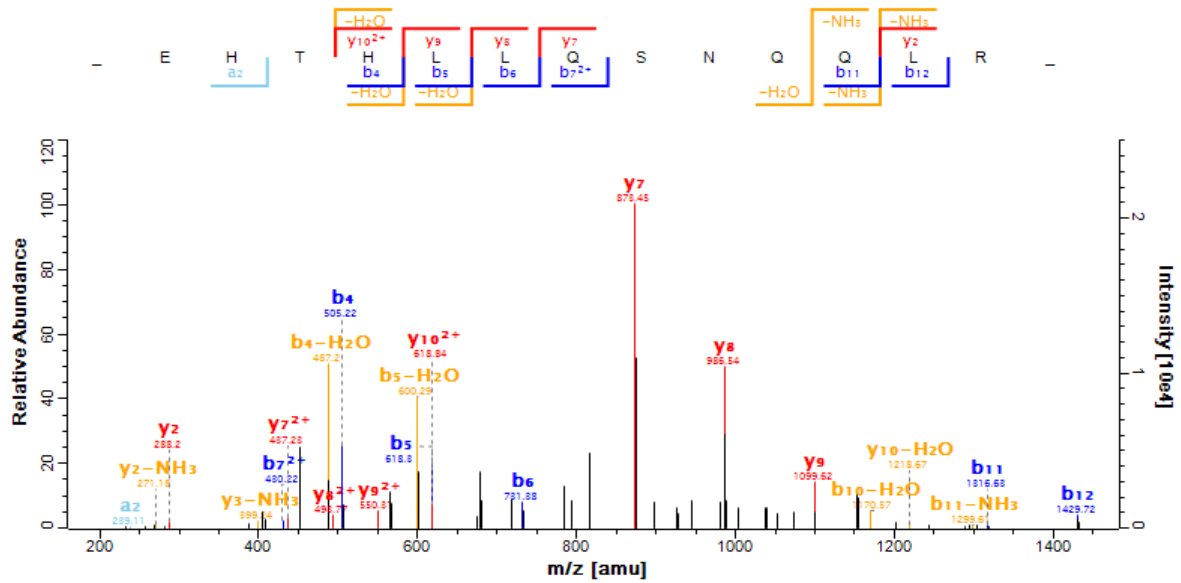

**Protein Group ID:** 928  
**Protein Accession Numbers:** E9PI62; Q9BT17  
**Gene Names:** MTG1  
**Peptide Sequence:** IQVSERPLMFLLDTPGVLR  
**Total Number of Spectra:** 4  
**Number of Replicates (out of 8):** 3  
**Best Match Score:** 145.61  
**Best Match Posterior Error Probability:** 1.16E-09  
**Best Match Spectrum:**

**Scan number** 87984      **Raw file** A549-US-WT-top20CID-Elite-2ug-B12  
**Method** ITMS; CID      **Genenames** MTG1

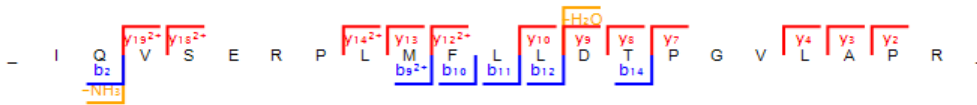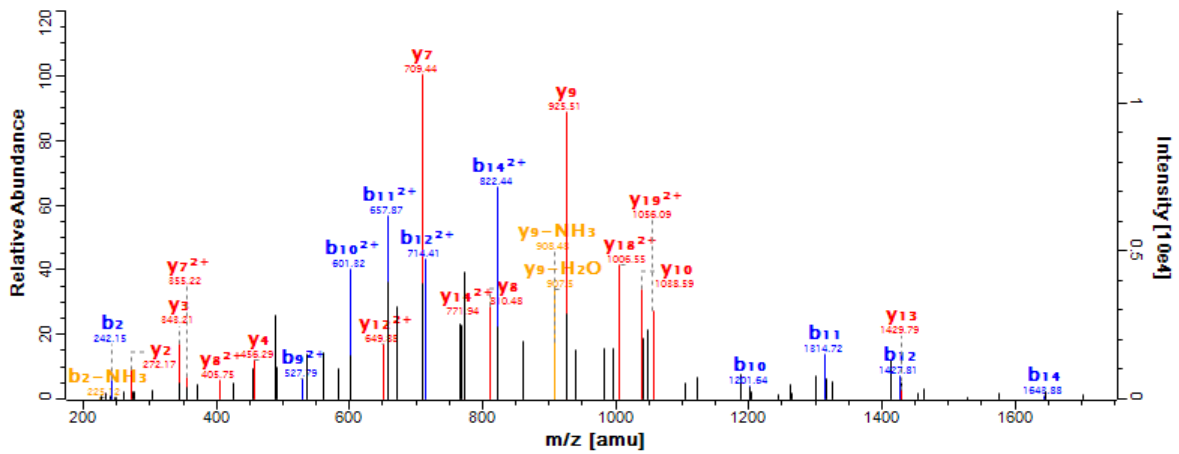

**Protein Group ID:** 932  
**Protein Accession Numbers:** O14521; E9PIC0  
**Gene Names:** SDHD  
**Peptide Sequence:** AVAMLWKL  
**Total Number of Spectra:** 1  
**Number of Replicates (out of 8):** 1  
**Best Match Score:** 140.53  
**Best Match Posterior Error Probability:** 0.0028284  
**Best Match Spectrum:**

**Scan number** 63991      **Raw file** A549-US-Mock-top20CID-Elite-2ug-B12  
**Method** ITMS; CID      **Genenames** SDHD

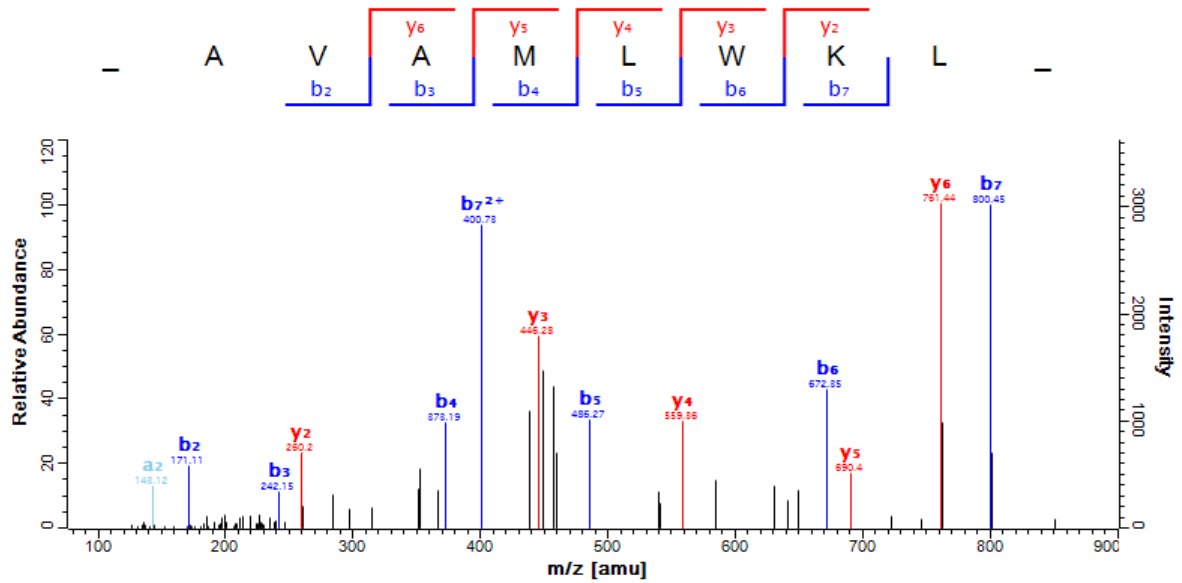

**Protein Group ID:** 933

**Protein Accession Numbers:** E9PPM1; O14683; E9PKZ4; E9PIK4; E9PIN5; E9PQ46; E9PMW4; E9PMY0; E9PS55; E9PKN9; E9PNB3; E9PN66

**Gene Names:** TP53I11

**Peptide Sequence:** ILGVGGEDDDGEVHR

**Total Number of Spectra:** 3

**Number of Replicates (out of 8):** 3

**Best Match Score:** 154.72

**Best Match Posterior Error Probability:** 2.69E-07

**Best Match Spectrum:**

|                    |           |                  |                                     |
|--------------------|-----------|------------------|-------------------------------------|
| <b>Scan number</b> | 23898     | <b>Raw file</b>  | A549-US-Mock-top20CID-Elite-2ug-B12 |
| <b>Method</b>      | ITMS; CID | <b>Genenames</b> | TP53I11                             |

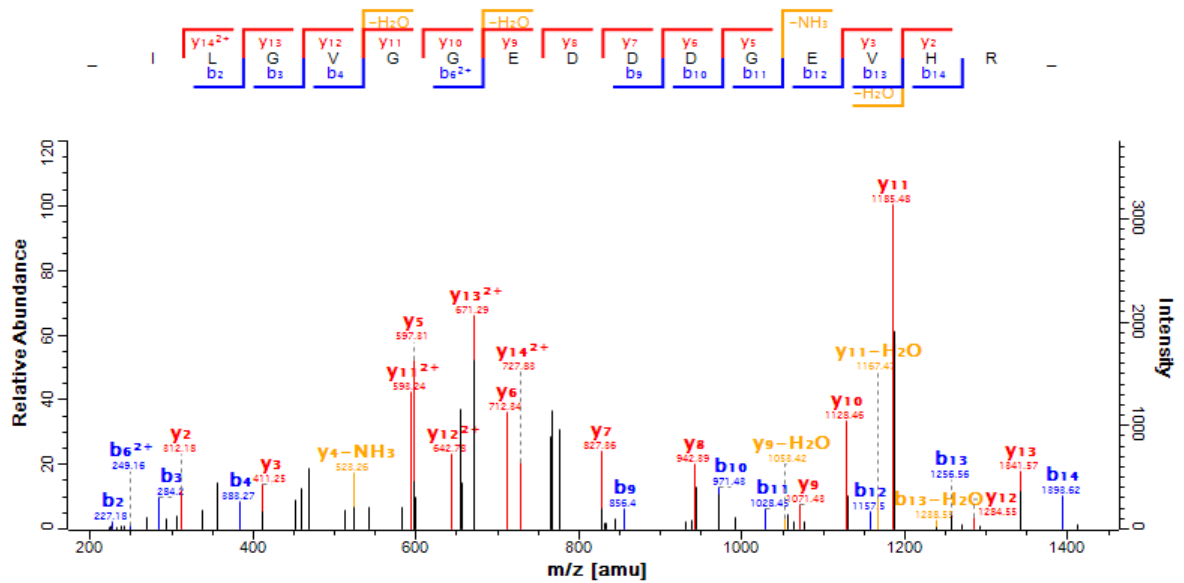

**Protein Group ID:** 935

**Protein Accession Numbers:** Q3B7T1; Q3B7T1-5; Q3B7T1-3; Q3B7T1-4; E9PJ07

**Gene Names:** EDRF1;C10orf137

**Peptide Sequence:** EAGAEGPPAGAAAR

**Total Number of Spectra:** 8

**Number of Replicates (out of 8):** 7

**Best Match Score:** 115.57

**Best Match Posterior Error Probability:** 0.00010623

**Best Match Spectrum:**

|                    |           |                  |                                     |
|--------------------|-----------|------------------|-------------------------------------|
| <b>Scan number</b> | 5330      | <b>Raw file</b>  | A549-US-Mock-top20CID-Elite-2ug-B12 |
| <b>Method</b>      | ITMS; CID | <b>Genenames</b> | EDRF1;C10orf137                     |

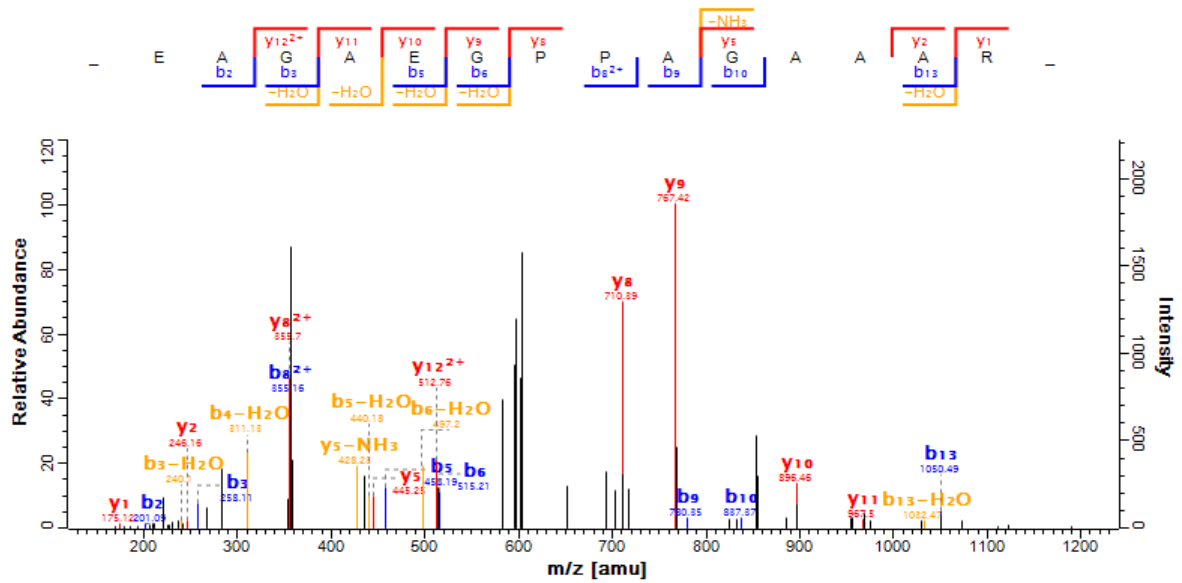

**Protein Group ID:** 937

**Protein Accession Numbers:** Q5BJD5; E9PJ42; Q5BJD5-2; Q5BJD5-3

**Gene Names:** TMEM41B

**Peptide Sequence:** SQLGAHHTTPVGDGAAGTR

**Total Number of Spectra:** 12

**Number of Replicates (out of 8):** 8

**Best Match Score:** 206.62

**Best Match Posterior Error Probability:** 1.86E-42

**Best Match Spectrum:**

**Scan number** 8566      **Raw file** A549-US-Mock-top20CID-Elite-2ug-B14  
**Method** ITMS; CID      **Genenames** TMEM41B

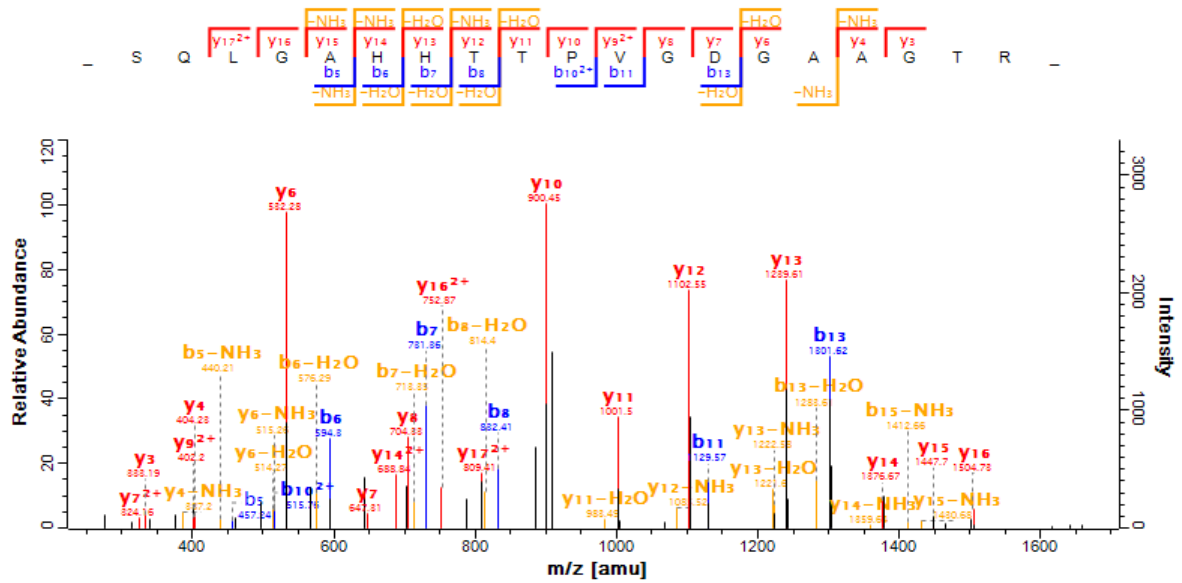

**Protein Group ID:** 942  
**Protein Accession Numbers:** Q9GZQ3; E9PJE4  
**Gene Names:** COMMD5  
**Peptide Sequence:** FVVSSLQGEDCR  
**Total Number of Spectra:** 3  
**Number of Replicates (out of 8):** 3  
**Best Match Score:** 154.36  
**Best Match Posterior Error Probability:** 1.52E-06  
**Best Match Spectrum:**

**Scan number** 30098      **Raw file** A549-US-Mock-top20CID-Elite-2ug-B11  
**Method** ITMS; CID      **Genenames** COMMD5

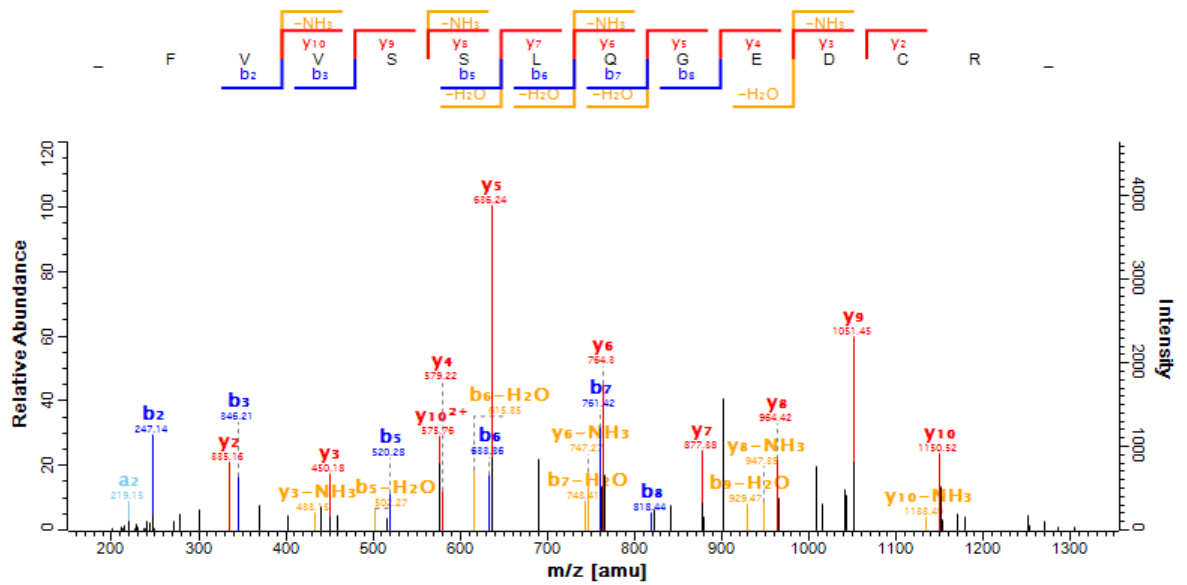



**Protein Group ID:** 943

**Protein Accession Numbers:** Q8N9N2; Q8N9N2-2; E9PQZ6; E9PR40; E9PKM6; E9PL92; E9PJM2; E9PQ44

**Gene Names:** ASCC1

**Peptide Sequence:** MEVLRPQLIR

**Total Number of Spectra:** 1

**Number of Replicates (out of 8):** 1

**Best Match Score:** 135.55

**Best Match Posterior Error Probability:** 5.50E-05

**Best Match Spectrum:**

**Scan number** 58755      **Raw file** A549-US-Mock-top20CID-Elite-2ug-B14  
**Method** ITMS: CID      **Genenames** ASCC1

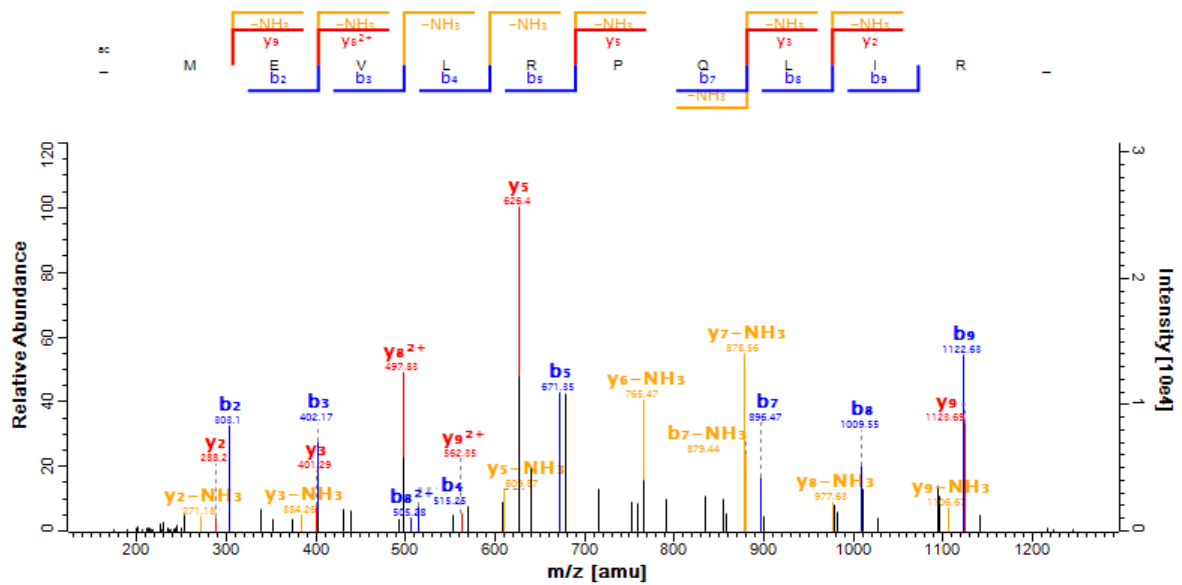

**Protein Group ID:** 944

**Protein Accession Numbers:** E9PL17; Q92989; Q92989-2; E9PJM4

**Gene Names:** CLP1

**Peptide Sequence:** VMVVGPTDVGK

**Total Number of Spectra:** 1

**Number of Replicates (out of 8):** 1

**Best Match Score:** 82.417

**Best Match Posterior Error Probability:** 0.003201

**Best Match Spectrum:**

**Scan number** 27304      **Raw file** A549-US-WT-top20CID-Elite-2ug-B13  
**Method** ITMS; CID      **Genenames** CLP1

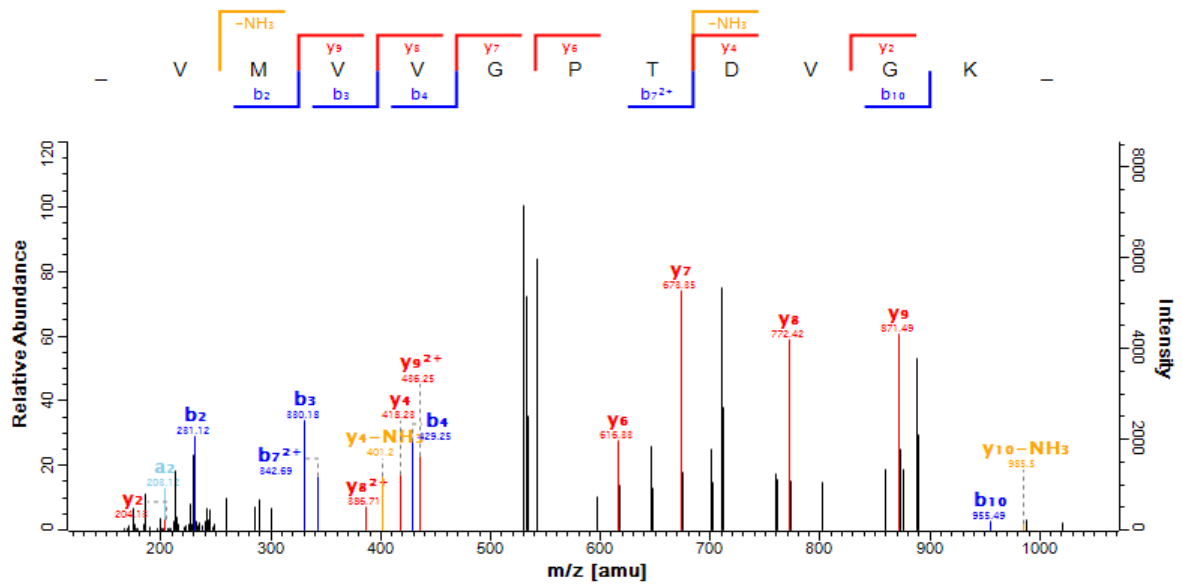

**Protein Group ID:** 946

**Protein Accession Numbers:** Q7Z5B4; Q7Z5B4-5; E9PK46; F5GZ89

**Gene Names:** RIC3

**Peptide Sequence:** ITSFELAK

**Total Number of Spectra:** 3

**Number of Replicates (out of 8):** 3

**Best Match Score:** 115.12

**Best Match Posterior Error Probability:** 0.00050755

**Best Match Spectrum:**

**Scan number** 88608      **Raw file** A549-US-Mock-top20CID-Elite-2ug-B14  
**Method** ITMS; CID      **Genenames** RIC3

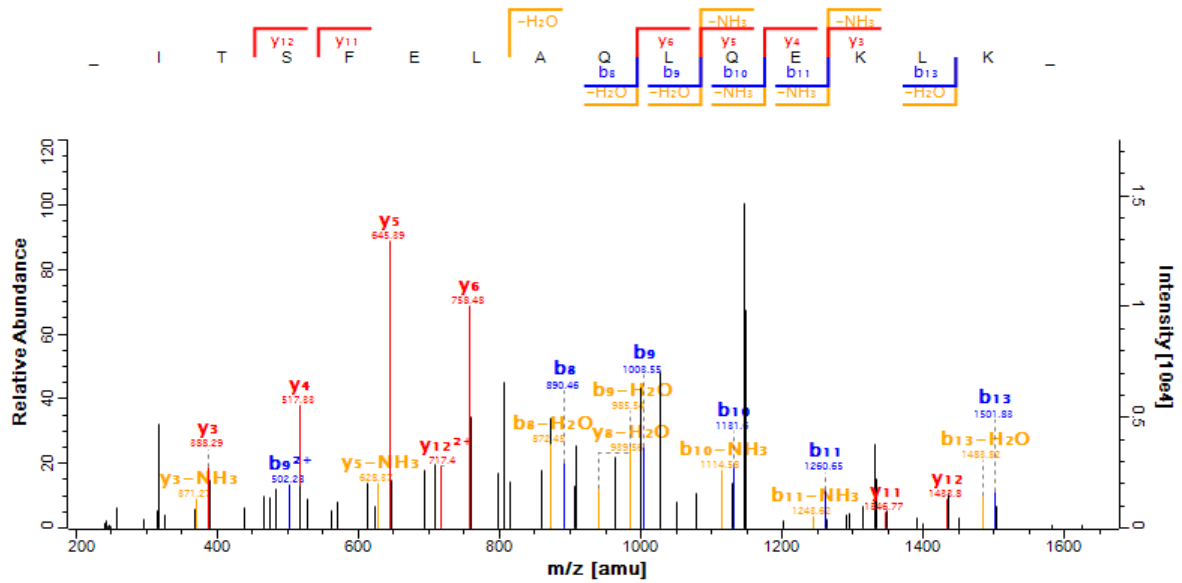

**Protein Group ID:** 949

**Protein Accession Numbers:** O94830; E9PKE6

**Gene Names:** DDHD2

**Peptide Sequence:** LMVHYQPVAGSDDWGSTPTEQGRPR

**Total Number of Spectra:** 1

**Number of Replicates (out of 8):** 1

**Best Match Score:** 72.09

**Best Match Posterior Error Probability:** 0.0013593

**Best Match Spectrum:**

**Scan number** 39655      **Raw file** A549-US-Mock-top20CID-Elite-2ug-B12  
**Method** ITMS; CID      **Genenames** DDHD2

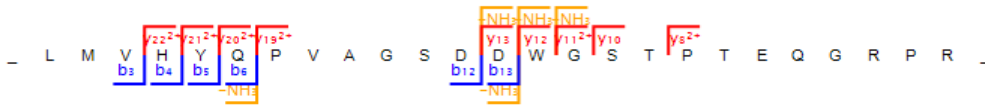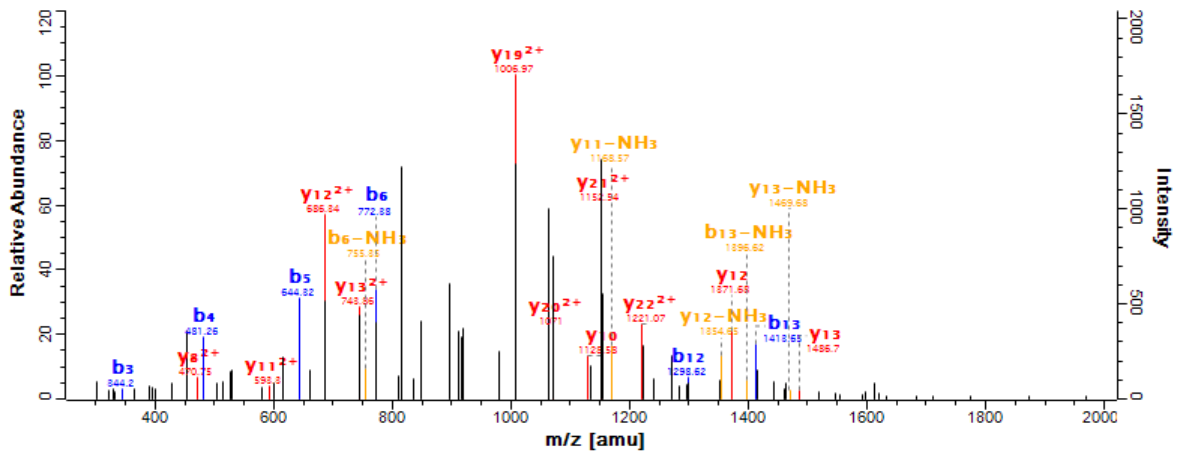

**Protein Group ID:** 953

**Protein Accession Numbers:** P42695; G3V1A9; E9PKK4

**Gene Names:** NCAPD3

**Peptide Sequence:** SALQVLVSILK

**Total Number of Spectra:** 1

**Number of Replicates (out of 8):** 1

**Best Match Score:** 120.87

**Best Match Posterior Error Probability:** 5.44E-05

**Best Match Spectrum:**

**Scan number** 88219      **Raw file** A549-US-Mock-top20CID-Elite-2ug-B14  
**Method** ITMS; CID      **Genenames** NCAPD3

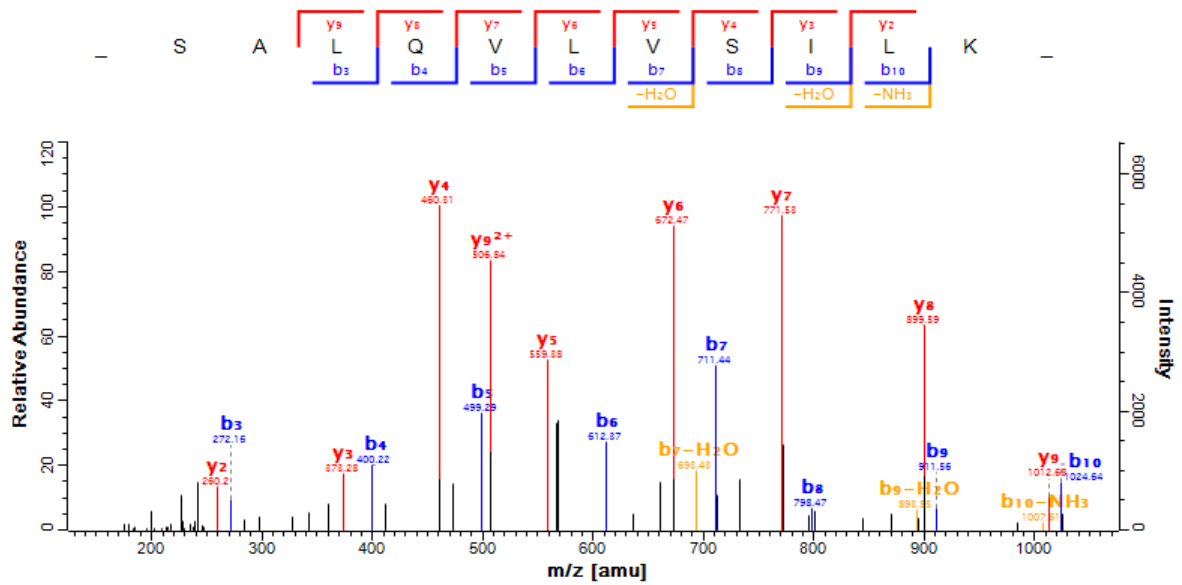

**Protein Group ID:** 954

**Protein Accession Numbers:** E9PN81; Q8TDP1; Q8TDP1-2; H0YEF3; H0YCP5; H0YE52; E9PKP0

**Gene Names:** RNASEH2C

**Peptide Sequence:** FTLWGLETIPGPDAK

**Total Number of Spectra:** 1

**Number of Replicates (out of 8):** 1

**Best Match Score:** 81.703

**Best Match Posterior Error Probability:** 0.0022241

**Best Match Spectrum:**

|                    |           |                  |                                     |
|--------------------|-----------|------------------|-------------------------------------|
| <b>Scan number</b> | 74423     | <b>Raw file</b>  | A549-US-Mock-top20CID-Elite-2ug-B11 |
| <b>Method</b>      | ITMS; CID | <b>Genenames</b> | RNASEH2C                            |

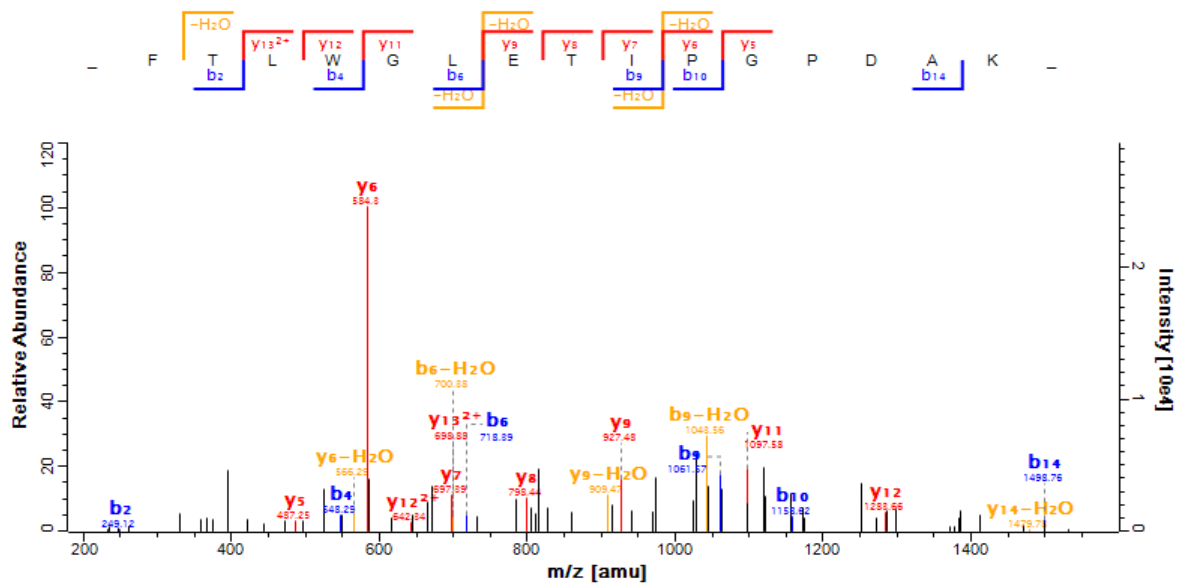

**Protein Group ID:** 956

**Protein Accession Numbers:** Q9Y5Q0; E9PS00; E9PKP8; H0YED5; H0YCN1

**Gene Names:** FADS3

**Peptide Sequence:** PFLTALVDIVR

**Total Number of Spectra:** 2

**Number of Replicates (out of 8):** 2

**Best Match Score:** 113.22

**Best Match Posterior Error Probability:** 0.00011911

**Best Match Spectrum:**

**Scan number** 83986      **Raw file** A549-US-WT-top20CID-Elite-2ug-B13  
**Method** ITMS; CID      **Genenames** FADS3

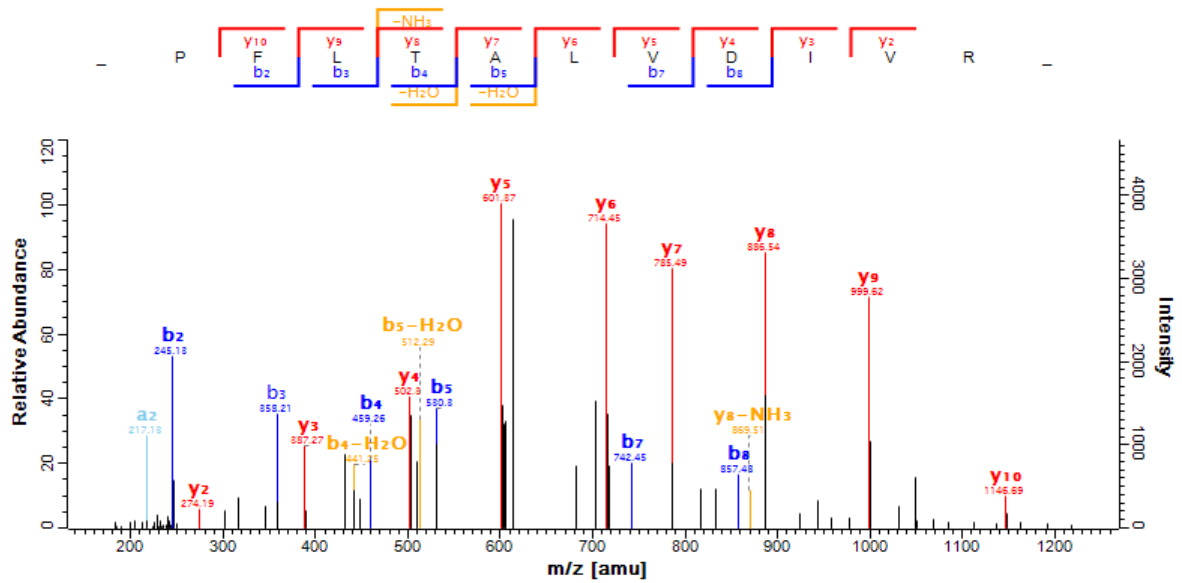

**Protein Group ID:** 958  
**Protein Accession Numbers:** O96033; E9PKT9  
**Gene Names:** MOCS2  
**Peptide Sequence:** SETISVPQEIK  
**Total Number of Spectra:** 3  
**Number of Replicates (out of 8):** 3  
**Best Match Score:** 86.114  
**Best Match Posterior Error Probability:** 0.002104  
**Best Match Spectrum:**

**Scan number** 32866      **Raw file** A549-US-WT-top20CID-Elite-2ug-B14  
**Method** ITMS; CID      **Genenames** MOCS2

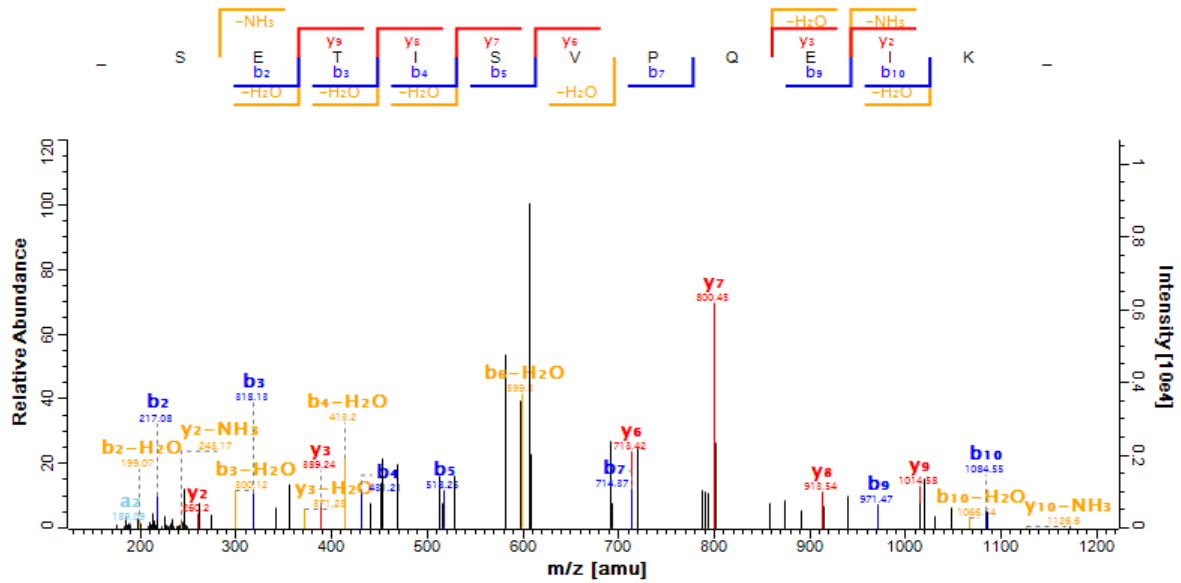





**Protein Group ID:** 960

**Protein Accession Numbers:** P48509; E9PMR4; E9PRJ3; E9PL82

**Gene Names:** CD151

**Peptide Sequence:** TVVALCGQR

**Total Number of Spectra:** 8

**Number of Replicates (out of 8):** 8

**Best Match Score:** 125.82

**Best Match Posterior Error Probability:** 0.00022929

**Best Match Spectrum:**

|                    |           |                  |                                     |
|--------------------|-----------|------------------|-------------------------------------|
| <b>Scan number</b> | 15563     | <b>Raw file</b>  | A549-US-Mock-top20CID-Elite-2ug-B11 |
| <b>Method</b>      | ITMS; CID | <b>Genenames</b> | CD151                               |

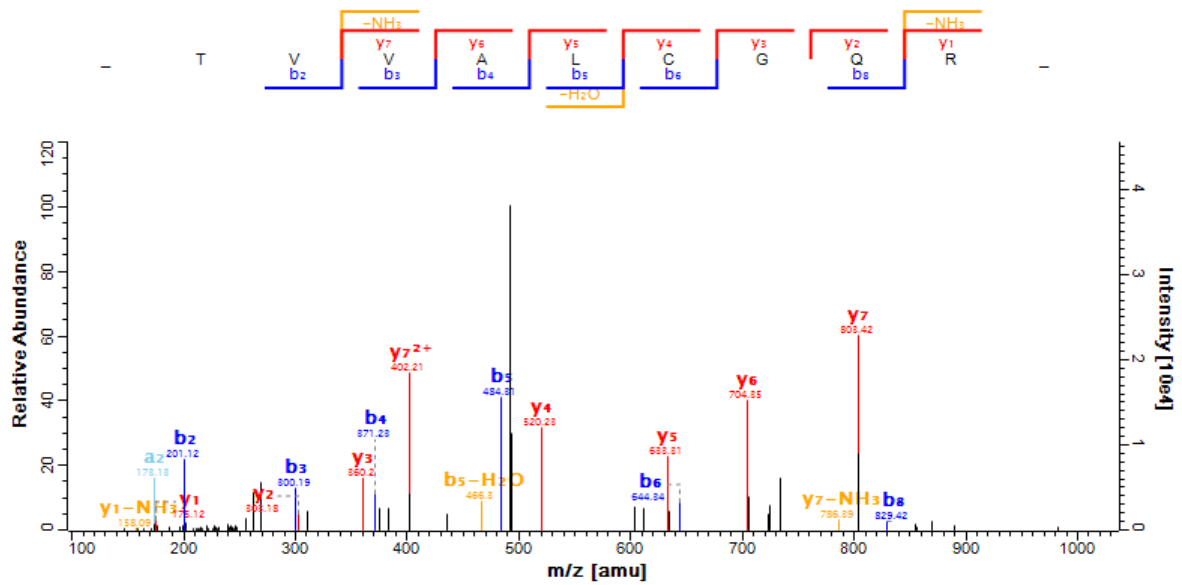



**Protein Group ID:** 964

**Protein Accession Numbers:** E9PQA6; Q96EY5; Q96EY5-3; E9PLL0

**Gene Names:** FAM125A

**Peptide Sequence:** IGDMGGFAIWCK

**Total Number of Spectra:** 1

**Number of Replicates (out of 8):** 1

**Best Match Score:** 105.17

**Best Match Posterior Error Probability:** 0.00038567

**Best Match Spectrum:**

|                    |           |                  |                                     |
|--------------------|-----------|------------------|-------------------------------------|
| <b>Scan number</b> | 61721     | <b>Raw file</b>  | A549-US-Mock-top20CID-Elite-2ug-B14 |
| <b>Method</b>      | ITMS; CID | <b>Genenames</b> | FAM125A                             |

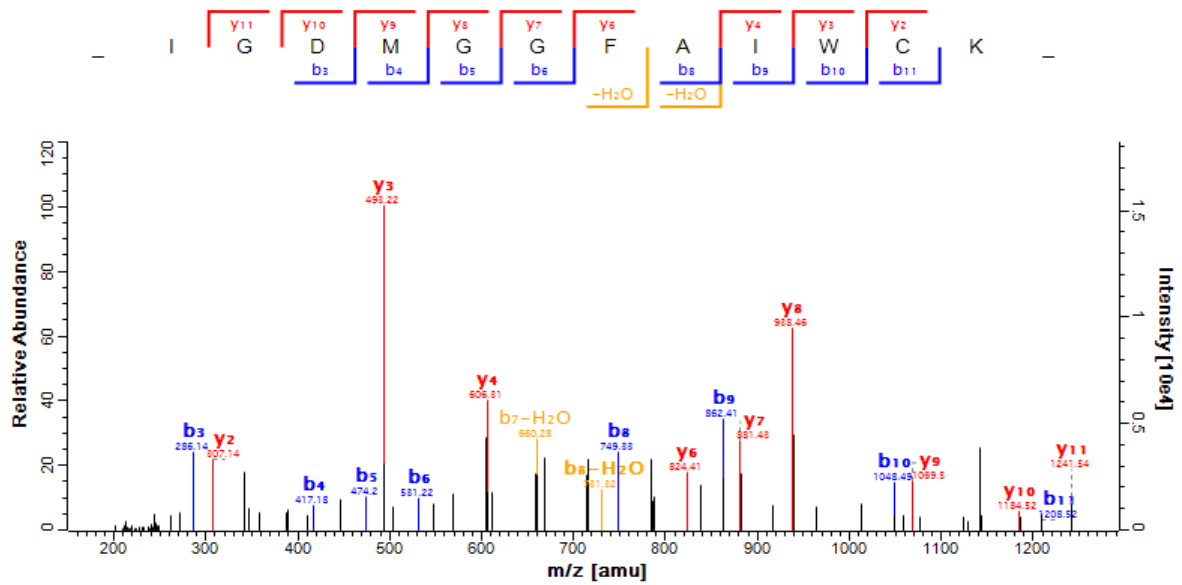

**Protein Group ID:** 966

**Protein Accession Numbers:** E9PLN8; Q9BQB6; Q9BQB6-2; F8W9H0; I3L3B4; Q9BQB6-3

**Gene Names:** VKORC1

**Peptide Sequence:** ALCDVGTAISCSR

**Total Number of Spectra:** 6

**Number of Replicates (out of 8):** 5

**Best Match Score:** 147.73

**Best Match Posterior Error Probability:** 1.82E-06

**Best Match Spectrum:**

**Scan number** 30094      **Raw file** A549-US-WT-top20CID-Elite-2ug-B11  
**Method** ITMS: CID      **Genenames** VKORC1

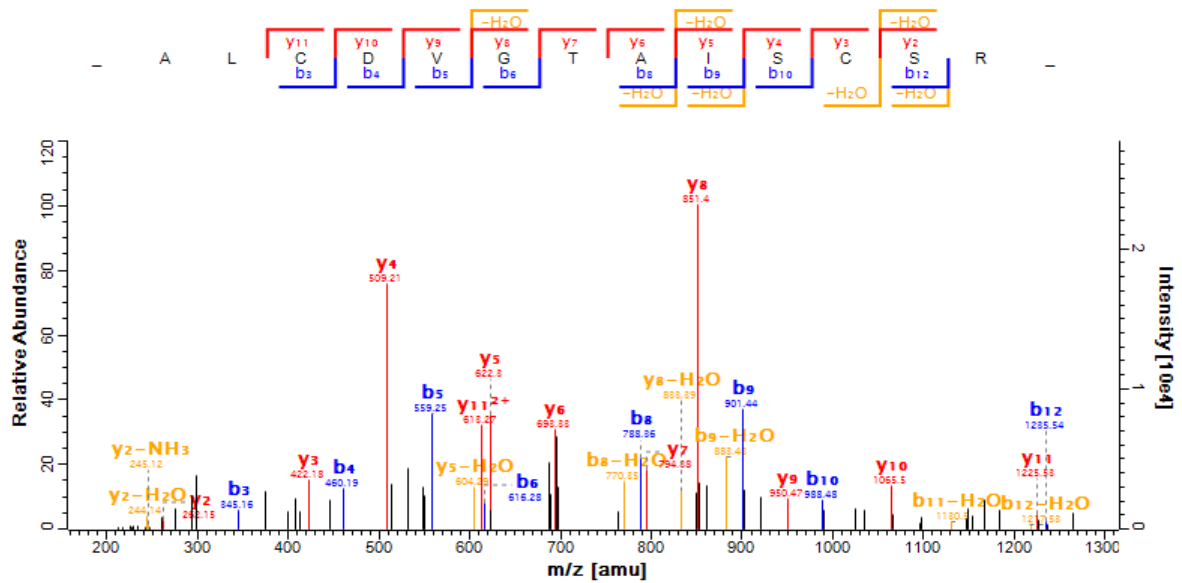

**Protein Group ID:** 968

**Protein Accession Numbers:** Q9Y5Y5-2; Q9Y5Y5; E9PP98; E9PMM3; E9PLS4

**Gene Names:** PEX16

**Peptide Sequence:** TLQNTPSLHSR

**Total Number of Spectra:** 7

**Number of Replicates (out of 8):** 6

**Best Match Score:** 119.74

**Best Match Posterior Error Probability:** 6.40E-05

**Best Match Spectrum:**

**Scan number** 11148      **Raw file** A549-US-Mock-top20CID-Elite-2ug-B14  
**Method** ITMS; CID      **Genenames** PEX16

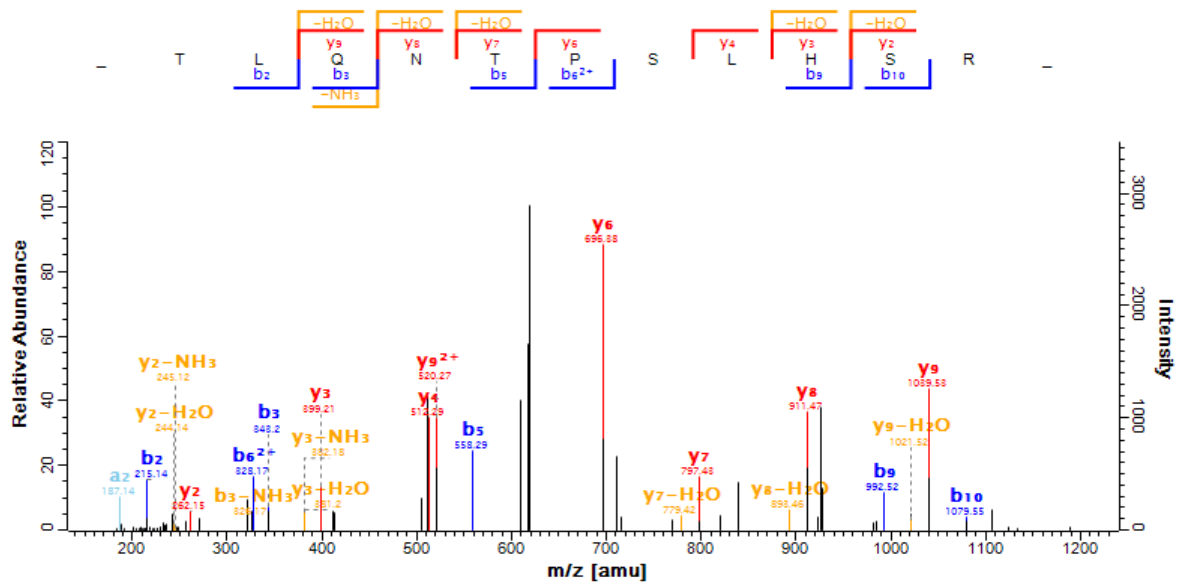

**Protein Group ID:** 969

**Protein Accession Numbers:** O43292; O43292-2; E9PPZ9; E9PLV6

**Gene Names:** GPAA1

**Peptide Sequence:** YMVSGTNVYGILR

**Total Number of Spectra:** 3

**Number of Replicates (out of 8):** 3

**Best Match Score:** 144.57

**Best Match Posterior Error Probability:** 4.74E-06

**Best Match Spectrum:**

**Scan number** 55170      **Raw file** A549-US-WT-top20CID-Elite-2ug-B12  
**Method** ITMS; CID      **Genenames** GPAA1

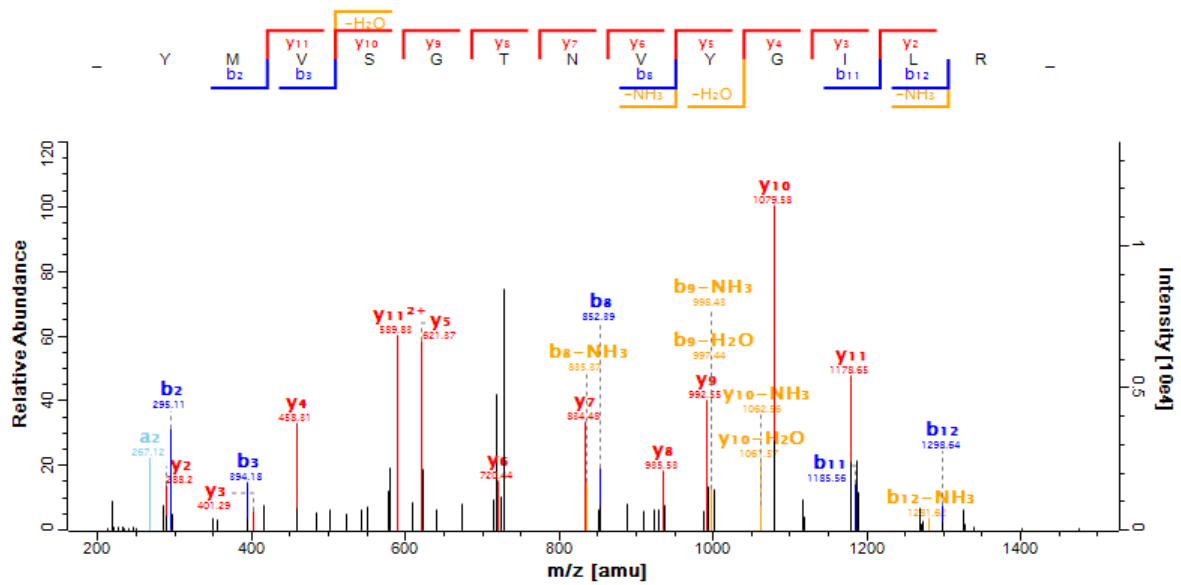

**Protein Group ID:** 970

**Protein Accession Numbers:** Q8N573; Q8N573-8; Q8N573-5; Q8N573-2; H0YC07; Q8N573-6; Q8N573-4; Q8N573-7; E9PLW2

**Gene Names:** OXR1

**Peptide Sequence:** DSDGQVFGALASEPLK

**Total Number of Spectra:** 1

**Number of Replicates (out of 8):** 1

**Best Match Score:** 91.518

**Best Match Posterior Error Probability:** 0.00050492

**Best Match Spectrum:**

|                    |           |                  |                                     |
|--------------------|-----------|------------------|-------------------------------------|
| <b>Scan number</b> | 55341     | <b>Raw file</b>  | A549-US-Mock-top20CID-Elite-2ug-B14 |
| <b>Method</b>      | ITMS: CID | <b>Genenames</b> | OXR1                                |

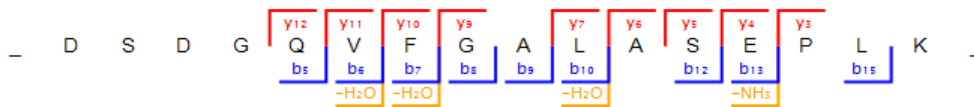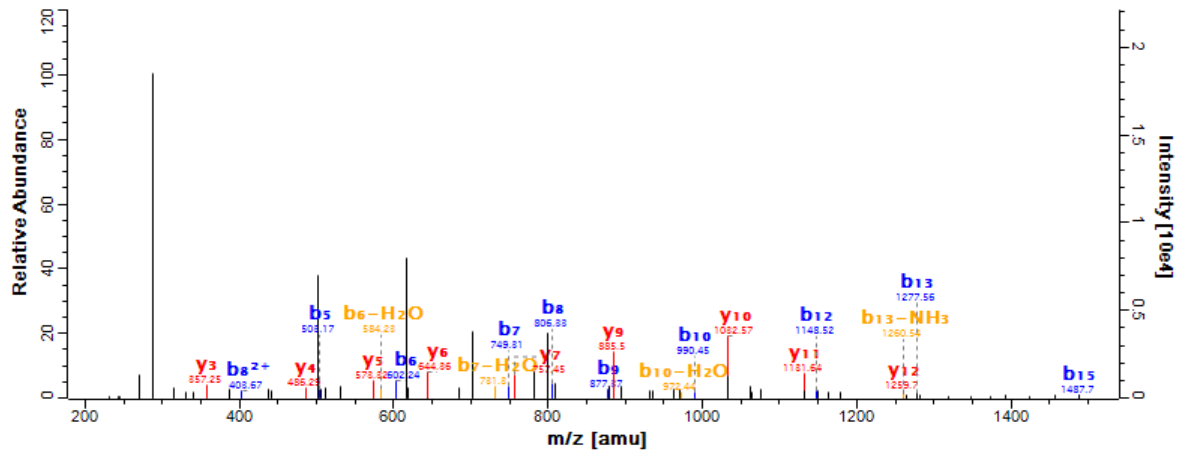



**Protein Group ID:** 974  
**Protein Accession Numbers:** Q7L1W4; E9PMF9  
**Gene Names:** LRRC8D  
**Peptide Sequence:** HVSTSSDEGSPSASTPMINK  
**Total Number of Spectra:** 1  
**Number of Replicates (out of 8):** 1  
**Best Match Score:** 107.41  
**Best Match Posterior Error Probability:** 6.11E-05  
**Best Match Spectrum:**

**Scan number** 16677      **Raw file** A549-US-WT-top20CID-Elite-2ug-B11  
**Method** ITMS; CID      **Genenames** LRRC8D

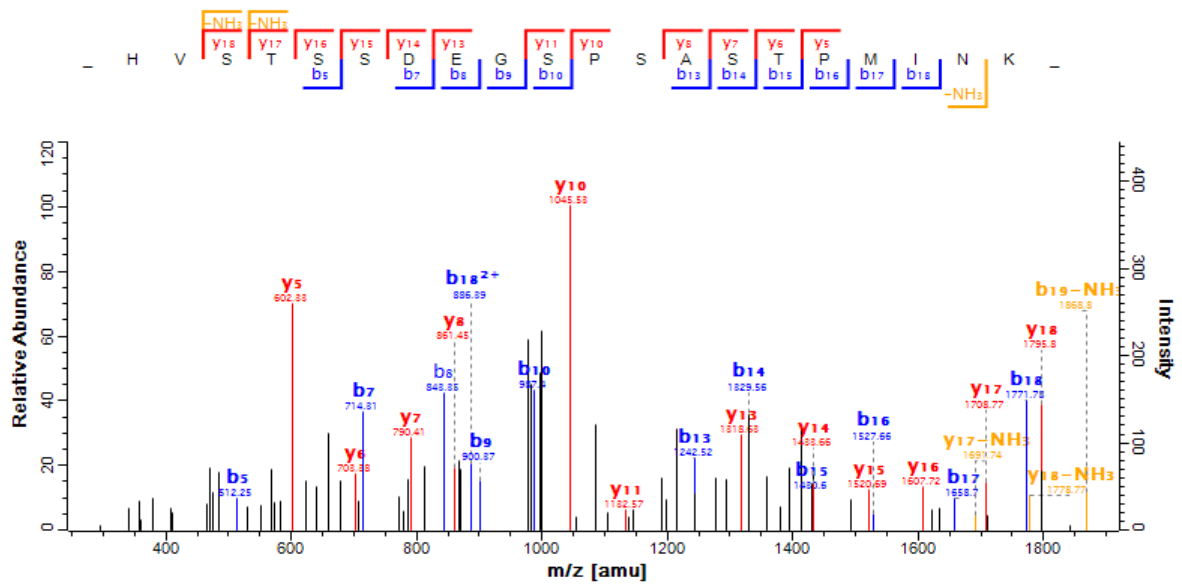

**Protein Group ID:** 979

**Protein Accession Numbers:** P49662; P49662-2; E9PMT1

**Gene Names:** CASP4

**Peptide Sequence:** ERAEEIYPIK

**Total Number of Spectra:** 1

**Number of Replicates (out of 8):** 1

**Best Match Score:** 110.84

**Best Match Posterior Error Probability:** 0.0014245

**Best Match Spectrum:**

**Scan number** 22265      **Raw file** A549-US-WT-top20CID-Elite-2ug-B12  
**Method** ITMS; CID      **Genenames** CASP4

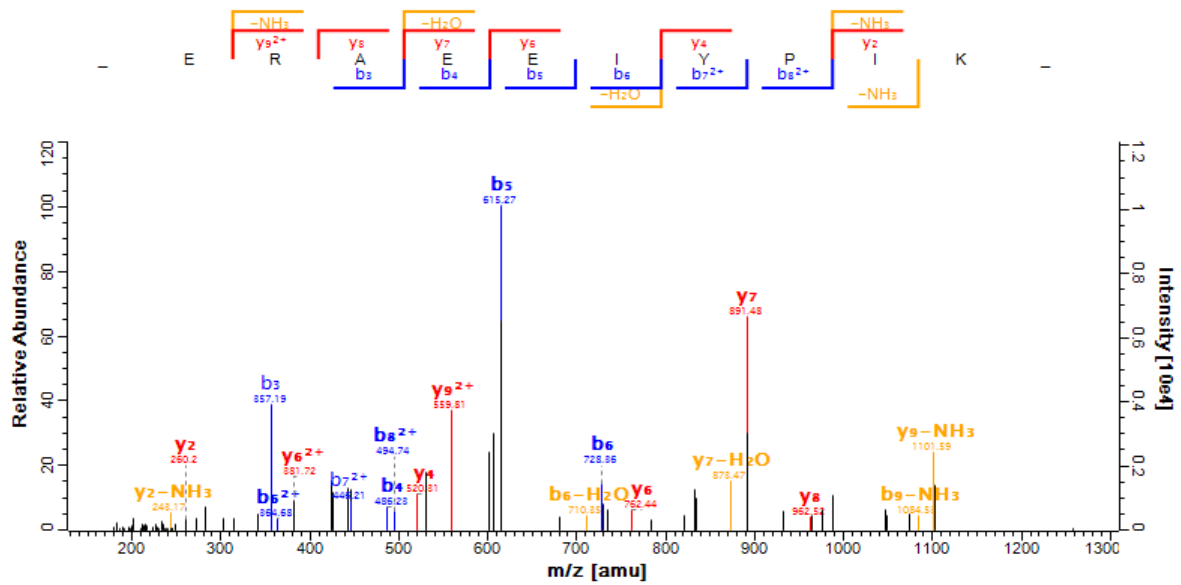

**Protein Group ID:** 981

**Protein Accession Numbers:** O00214-2; O00214; F6V2D4; E9PN19; H7BXD8

**Gene Names:** LGALS8

**Peptide Sequence:** DIALHLNPR

**Total Number of Spectra:** 2

**Number of Replicates (out of 8):** 2

**Best Match Score:** 122.28

**Best Match Posterior Error Probability:** 0.00030596

**Best Match Spectrum:**

|                    |           |                  |                                   |
|--------------------|-----------|------------------|-----------------------------------|
| <b>Scan number</b> | 30588     | <b>Raw file</b>  | A549-US-WT-top20CID-Elite-2ug-B11 |
| <b>Method</b>      | ITMS; CID | <b>Genenames</b> | LGALS8                            |

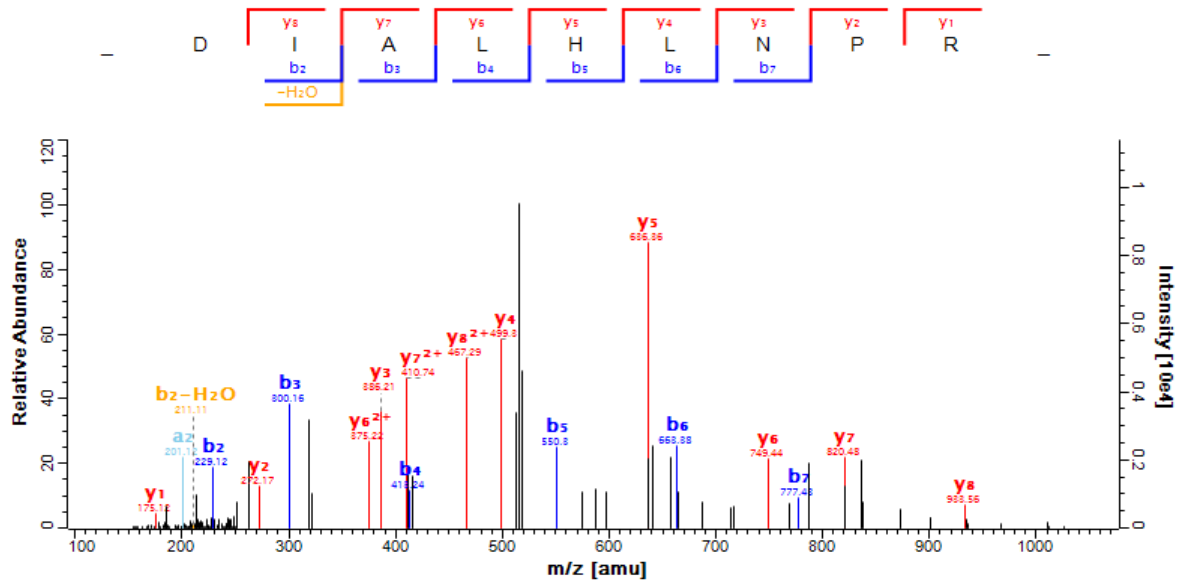

**Protein Group ID:** 982

**Protein Accession Numbers:** Q01433; H0Y360; Q01433-4; Q01433-2; E9PNG0; Q01433-3

**Gene Names:** AMPD2

**Peptide Sequence:** FQMHVLLNEMK

**Total Number of Spectra:** 1

**Number of Replicates (out of 8):** 1

**Best Match Score:** 87.667

**Best Match Posterior Error Probability:** 0.00172

**Best Match Spectrum:**

**Scan number** 49330      **Raw file** A549-US-Mock-top20CID-Elite-2ug-B12  
**Method** ITMS; CID      **Genenames** AMPD2

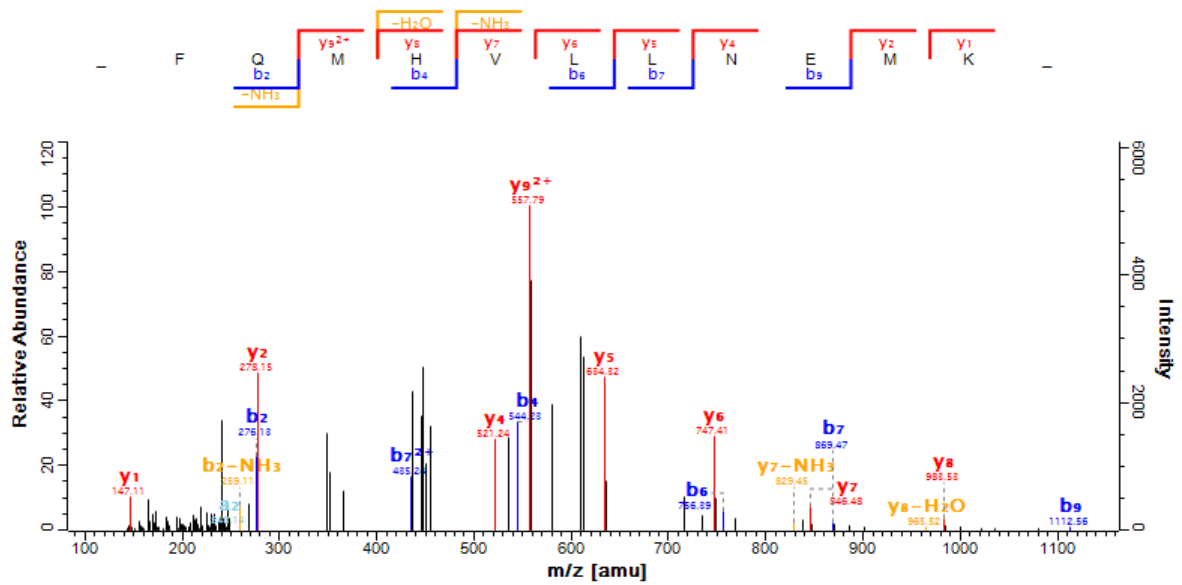

**Protein Group ID:** 985

**Protein Accession Numbers:** Q96PZ2; E9PR18; E9PNQ0

**Gene Names:** FAM111A

**Peptide Sequence:** KNPEDQTPMQNR

**Total Number of Spectra:** 3

**Number of Replicates (out of 8):** 3

**Best Match Score:** 105.03

**Best Match Posterior Error Probability:** 0.00090905

**Best Match Spectrum:**

**Scan number** 5228      **Raw file** A549-US-WT-top20CID-Elite-2ug-B12  
**Method** ITMS; CID      **Genenames** FAM111A

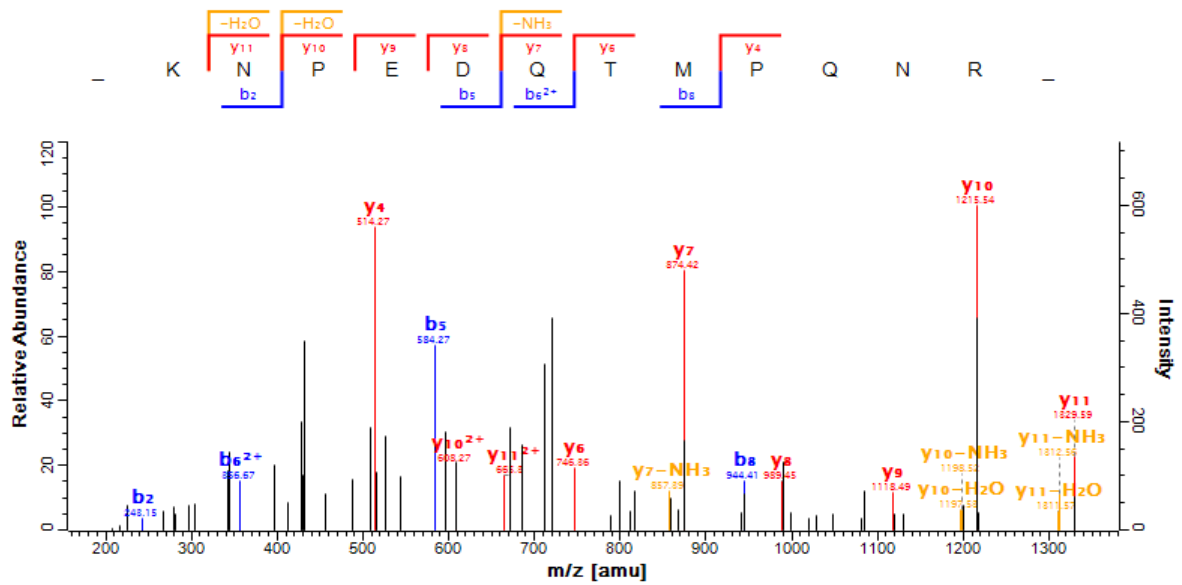

**Protein Group ID:** 988

**Protein Accession Numbers:** Q96K19; Q96K19-2; Q96K19-3; Q96K19-5; E9PP55

**Gene Names:** RNF170

**Peptide Sequence:** EQLQTEQDAPAATR

**Total Number of Spectra:** 9

**Number of Replicates (out of 8):** 7

**Best Match Score:** 181.58

**Best Match Posterior Error Probability:** 5.27E-19

**Best Match Spectrum:**

**Scan number** 12207      **Raw file** A549-US-WT-top20CID-Elite-2ug-B12  
**Method** ITMS; CID      **Genenames** RNF170

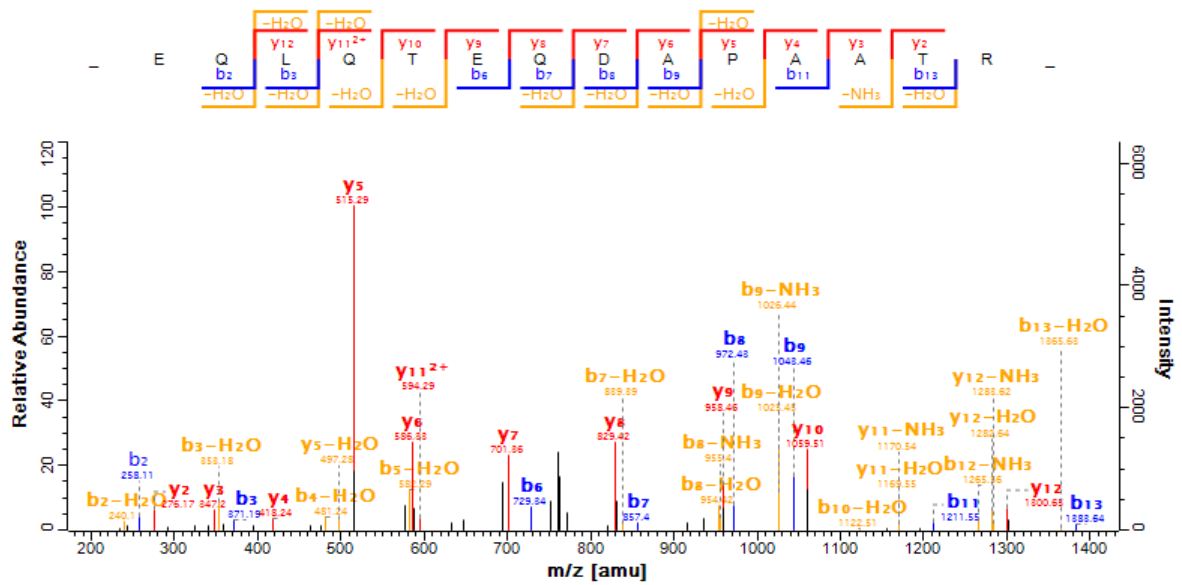

**Protein Group ID:** 998

**Protein Accession Numbers:** E9PSH4; Q9H063; E9PR76

**Gene Names:** MAF1

**Peptide Sequence:** SQGGEEEGPLSDK

**Total Number of Spectra:** 2

**Number of Replicates (out of 8):** 2

**Best Match Score:** 135.14

**Best Match Posterior Error Probability:** 3.89E-05

**Best Match Spectrum:**

**Scan number** 10053      **Raw file** A549-US-Mock-top20CID-Elite-2ug-B12  
**Method** ITMS; CID      **Genenames** MAF1

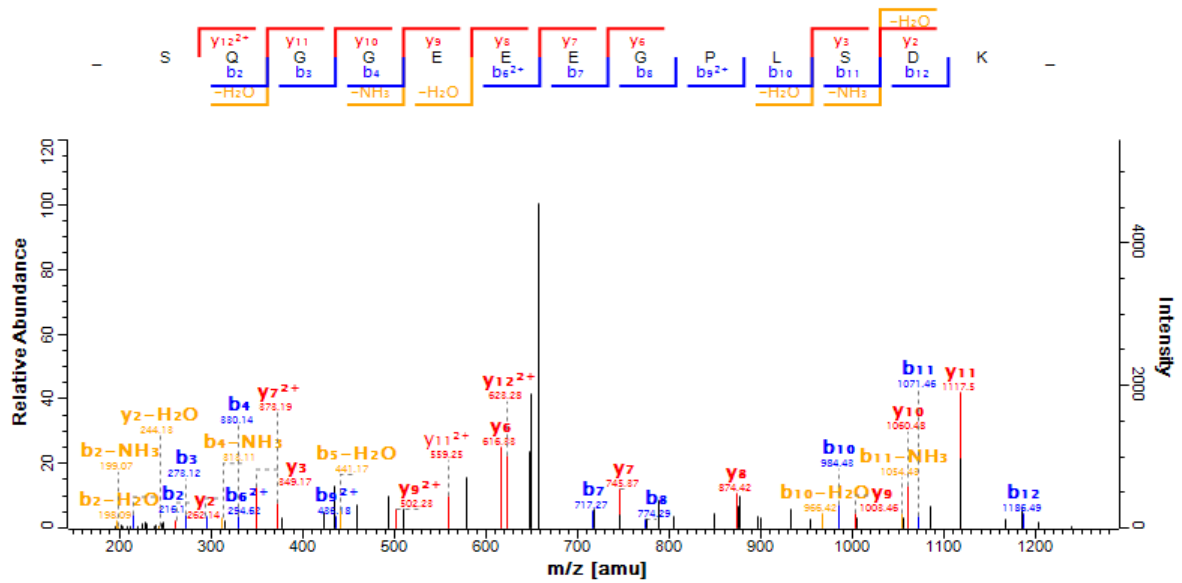

**Protein Group ID:** 999  
**Protein Accession Numbers:** O95298; E9PRB2  
**Gene Names:** NDUFC2  
**Peptide Sequence:** LHPEDFPEEDKK  
**Total Number of Spectra:** 9  
**Number of Replicates (out of 8):** 6  
**Best Match Score:** 129.82  
**Best Match Posterior Error Probability:** 0.00023425  
**Best Match Spectrum:**

**Scan number** 15118      **Raw file** A549-US-WT-top20CID-Elite-2ug-B14  
**Method** ITMS; CID      **Genenames** NDUFC2

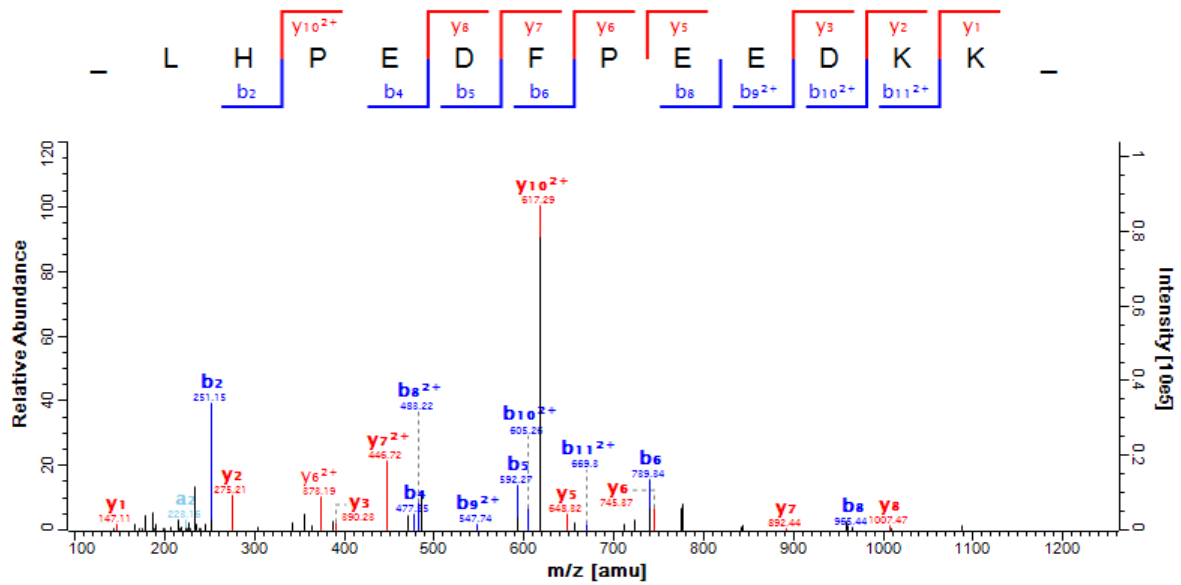



**Protein Group ID:** 1000  
**Protein Accession Numbers:** Q96BI1; E9PRM7  
**Gene Names:** SLC22A18  
**Peptide Sequence:** TLGPTVGGLLYR  
**Total Number of Spectra:** 5  
**Number of Replicates (out of 8):** 5  
**Best Match Score:** 110.08  
**Best Match Posterior Error Probability:** 0.00026584  
**Best Match Spectrum:**

**Scan number** 51194      **Raw file** A549-US-Mock-top20CID-Elite-2ug-B12  
**Method** ITMS; CID      **Genenames** SLC22A18

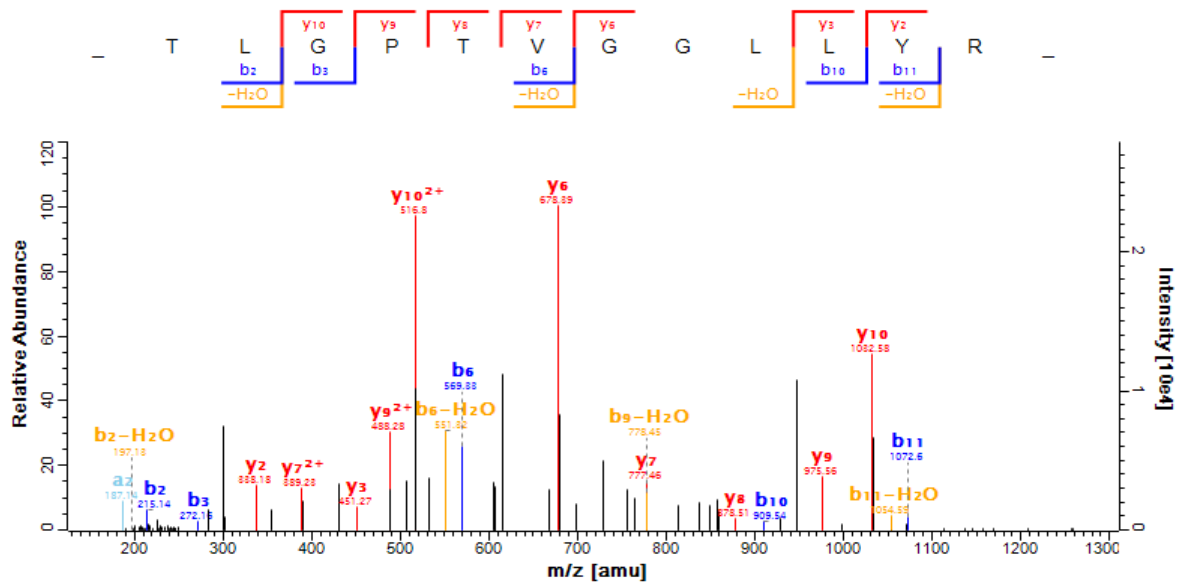

**Protein Group ID:** 1008

**Protein Accession Numbers:** E9PSI1; O15321; E9PMQ9; O15321-2; E9PJM1; E9PL78; E9PS99; E9PQY7; E9PJC4

**Gene Names:** TM9SF1

**Peptide Sequence:** VGPYHNSETPYHQYLYQLPVCPCPEK

**Total Number of Spectra:** 3

**Number of Replicates (out of 8):** 3

**Best Match Score:** 123.19

**Best Match Posterior Error Probability:** 2.21E-09

**Best Match Spectrum:**

**Scan number** 42201      **Raw file** A549-US-Mock-top20CID-Elite-2ug-B12  
**Method** ITMS: CID      **Genenames** TM9SF1

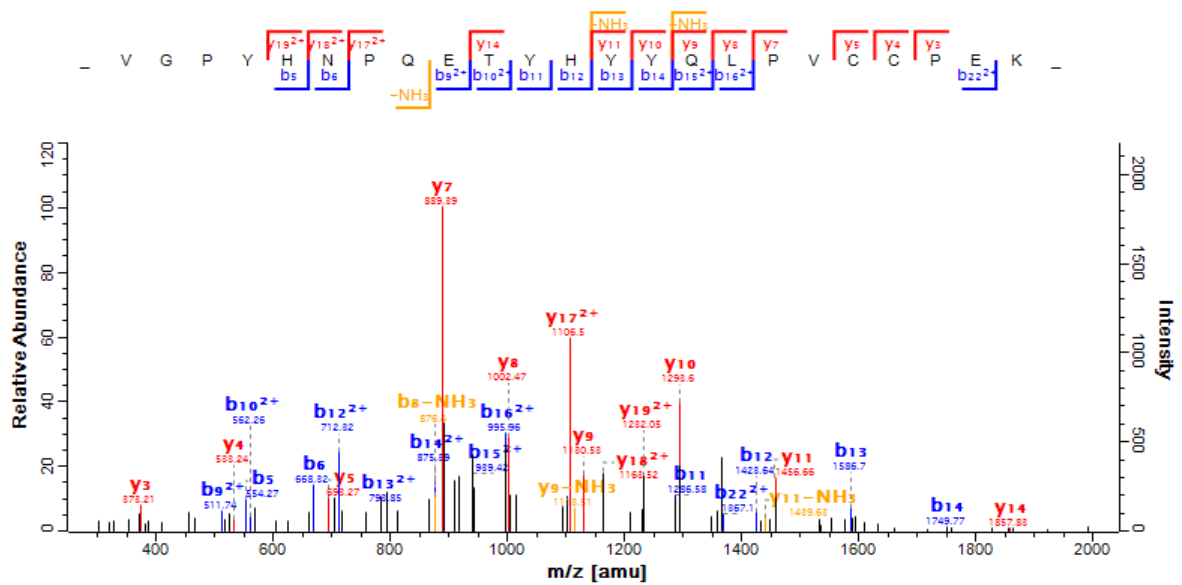

**Protein Group ID:** 1015

**Protein Accession Numbers:** P07902; G3V4G9; F2Z2X9; G3V223; G3V3U5

**Gene Names:** GALT

**Peptide Sequence:** QQASEADAAAATFR

**Total Number of Spectra:** 1

**Number of Replicates (out of 8):** 1

**Best Match Score:** 82.069

**Best Match Posterior Error Probability:** 0.0027382

**Best Match Spectrum:**

**Scan number** 22770      **Raw file** A549-US-Mock-top20CID-Elite-2ug-B11  
**Method** ITMS; CID      **Genenames** GALT

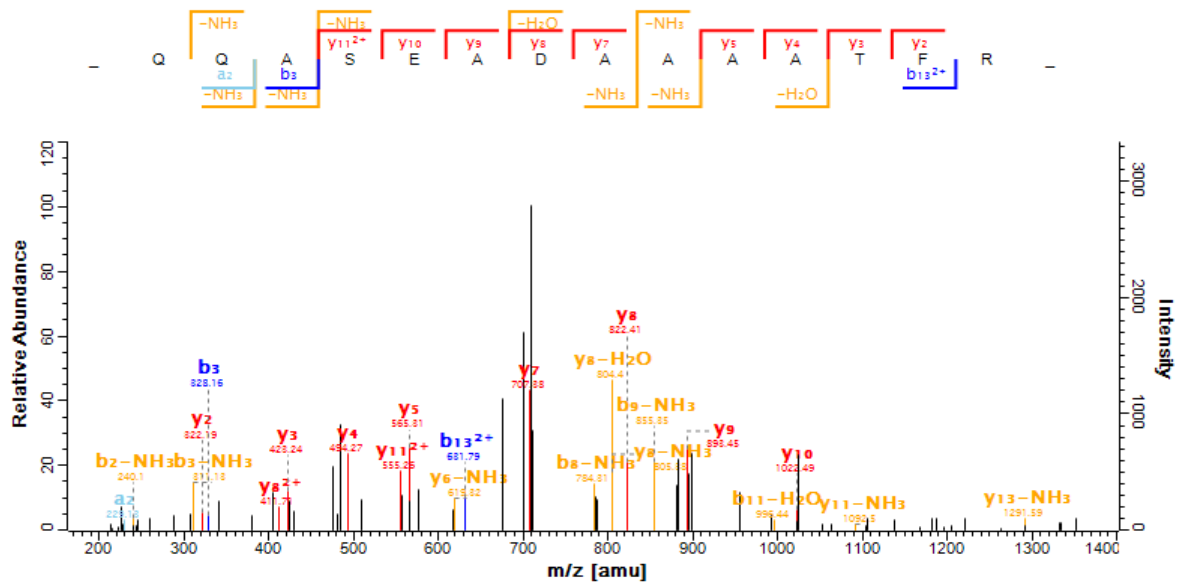

**Protein Group ID:** 1017

**Protein Accession Numbers:** J3QSS6; J3KPC5; P47736-3; P47736-2; P47736; G3V1A7; F2Z357

**Gene Names:** RAP1GAP

**Peptide Sequence:** DDVPPFFGPPLPDPAVR

**Total Number of Spectra:** 3

**Number of Replicates (out of 8):** 3

**Best Match Score:** 107.07

**Best Match Posterior Error Probability:** 0.00012085

**Best Match Spectrum:**

|                    |           |                  |                                     |
|--------------------|-----------|------------------|-------------------------------------|
| <b>Scan number</b> | 84379     | <b>Raw file</b>  | A549-US-Mock-top20CID-Elite-2ug-B12 |
| <b>Method</b>      | ITMS: CID | <b>Genenames</b> | RAP1GAP                             |

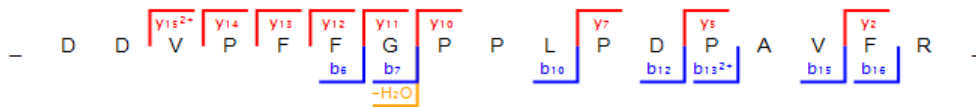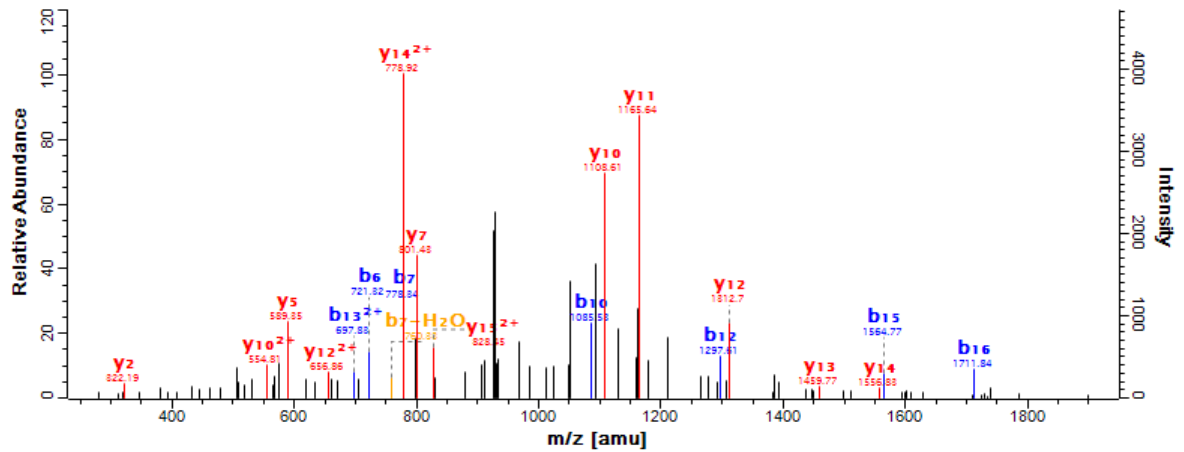

**Protein Group ID:** 1018

**Protein Accession Numbers:** P42766; F2Z388; H0Y3A0

**Gene Names:** RPL35

**Peptide Sequence:** VLTVINQTQK

**Total Number of Spectra:** 11

**Number of Replicates (out of 8):** 8

**Best Match Score:** 195.51

**Best Match Posterior Error Probability:** 5.83E-13

**Best Match Spectrum:**

**Scan number** 19901      **Raw file** A549-US-Mock-top20CID-Elite-2ug-B11  
**Method** ITMS; CID      **Genenames** RPL35

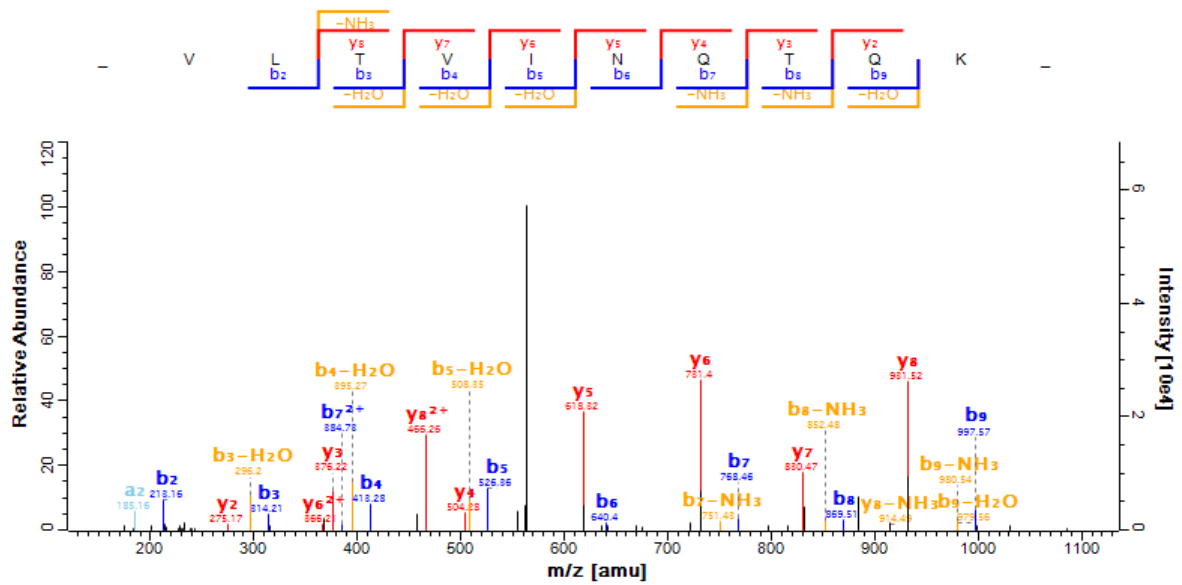

**Protein Group ID:** 1019

**Protein Accession Numbers:** Q9HBM0; F2Z3A6; F8W8C2; Q9HBM0-2

**Gene Names:** VEZT

**Peptide Sequence:** ALLNEVILIEDLEK

**Total Number of Spectra:** 3

**Number of Replicates (out of 8):** 3

**Best Match Score:** 92.939

**Best Match Posterior Error Probability:** 0.00061849

**Best Match Spectrum:**

|                    |           |                  |                                   |
|--------------------|-----------|------------------|-----------------------------------|
| <b>Scan number</b> | 89693     | <b>Raw file</b>  | A549-US-WT-top20CID-Elite-2ug-B13 |
| <b>Method</b>      | ITMS; CID | <b>Genenames</b> | VEZT                              |

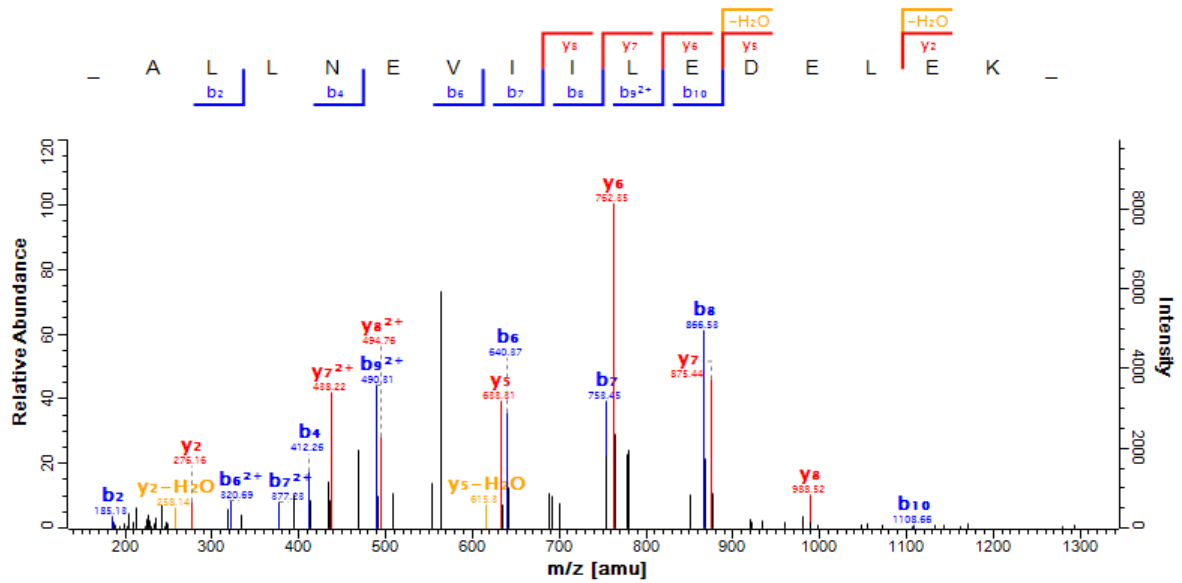

**Protein Group ID:** 1020  
**Protein Accession Numbers:** P61165; F5GWH5  
**Gene Names:** C11orf10  
**Peptide Sequence:** MELEAMSR  
**Total Number of Spectra:** 4  
**Number of Replicates (out of 8):** 4  
**Best Match Score:** 118.18  
**Best Match Posterior Error Probability:** 0.0031312  
**Best Match Spectrum:**

**Scan number** 44920      **Raw file** A549-US-Mock-top20CID-Elite-2ug-B11  
**Method** ITMS; CID      **Genenames** C11orf10

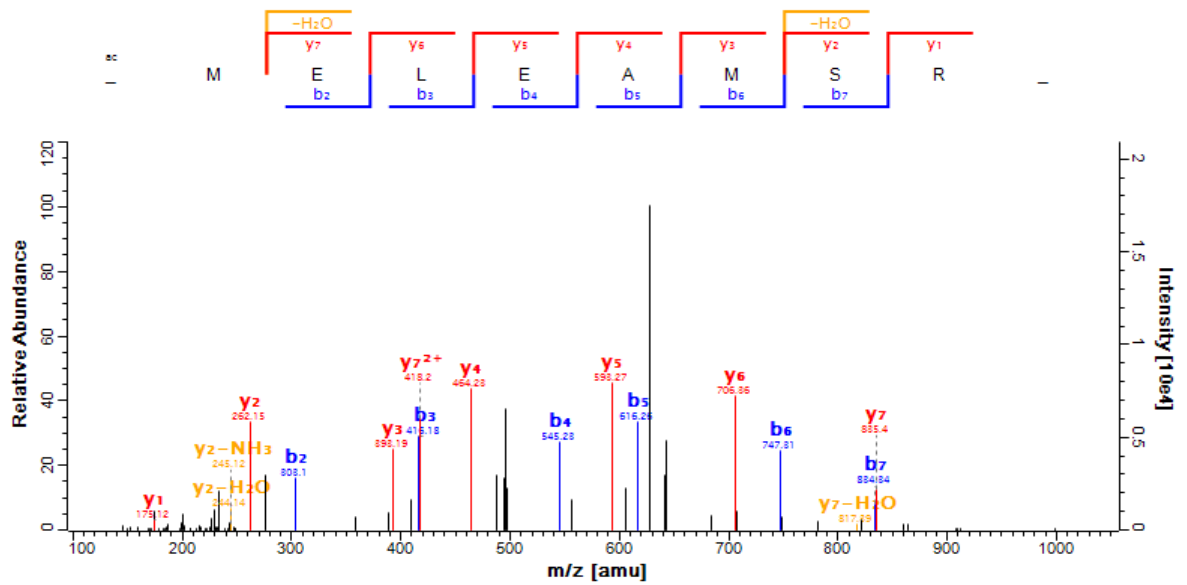

**Protein Group ID:** 1028

**Protein Accession Numbers:** Q6NXE6; Q6NXE6-2; F5H4P3; F5GWV0; F5H2K4; F5H2X2; F5H052

**Gene Names:** ARMC6

**Peptide Sequence:** VSADGSQEP<sup>1</sup>THDILQLML<sup>2</sup>SLDLQESVASSR<sup>3</sup>PQEVSA<sup>4</sup>YLTR<sup>5</sup>

**Total Number of Spectra:** 1

**Number of Replicates (out of 8):** 1

**Best Match Score:** 61.525

**Best Match Posterior Error Probability:** 0.0038862

**Best Match Spectrum:**

|                    |           |                  |                                   |
|--------------------|-----------|------------------|-----------------------------------|
| <b>Scan number</b> | 92890     | <b>Raw file</b>  | A549-US-WT-top20CID-Elite-2ug-B11 |
| <b>Method</b>      | ITMS: CID | <b>Genenames</b> | ARMC6                             |

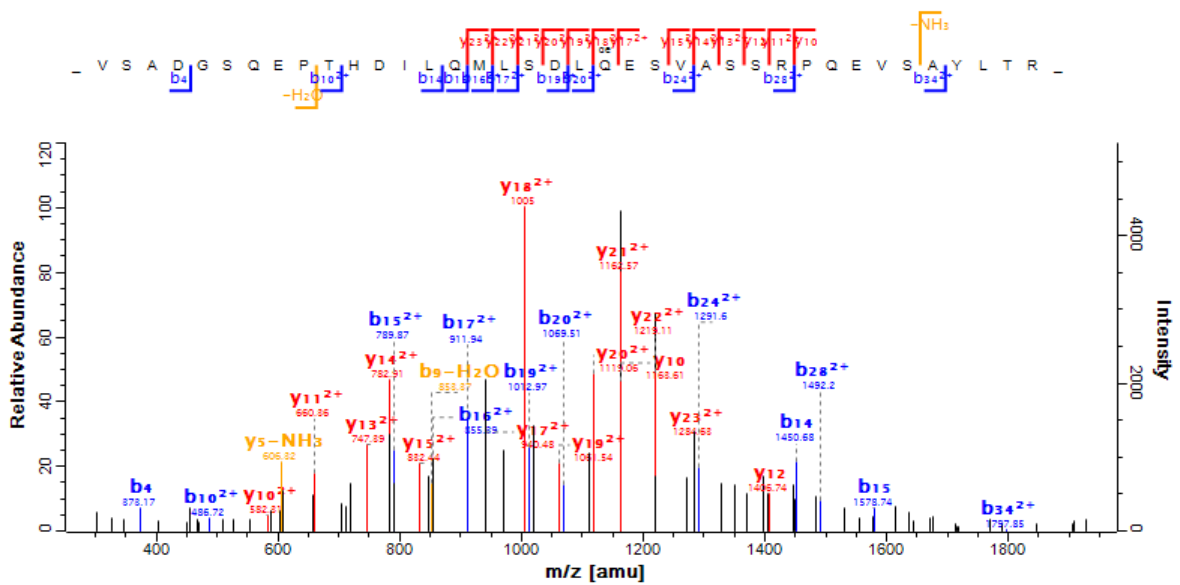



**Protein Group ID:** 1033

**Protein Accession Numbers:** Q8TB96; F5GXC5; H3BUJ1

**Gene Names:** ITFG1

**Peptide Sequence:** NDFAIHTLK

**Total Number of Spectra:** 1

**Number of Replicates (out of 8):** 1

**Best Match Score:** 104.82

**Best Match Posterior Error Probability:** 0.0013927

**Best Match Spectrum:**

|                    |           |                  |                                     |
|--------------------|-----------|------------------|-------------------------------------|
| <b>Scan number</b> | 25417     | <b>Raw file</b>  | A549-US-Mock-top20CID-Elite-2ug-B11 |
| <b>Method</b>      | ITMS; CID | <b>Genenames</b> | ITFG1                               |

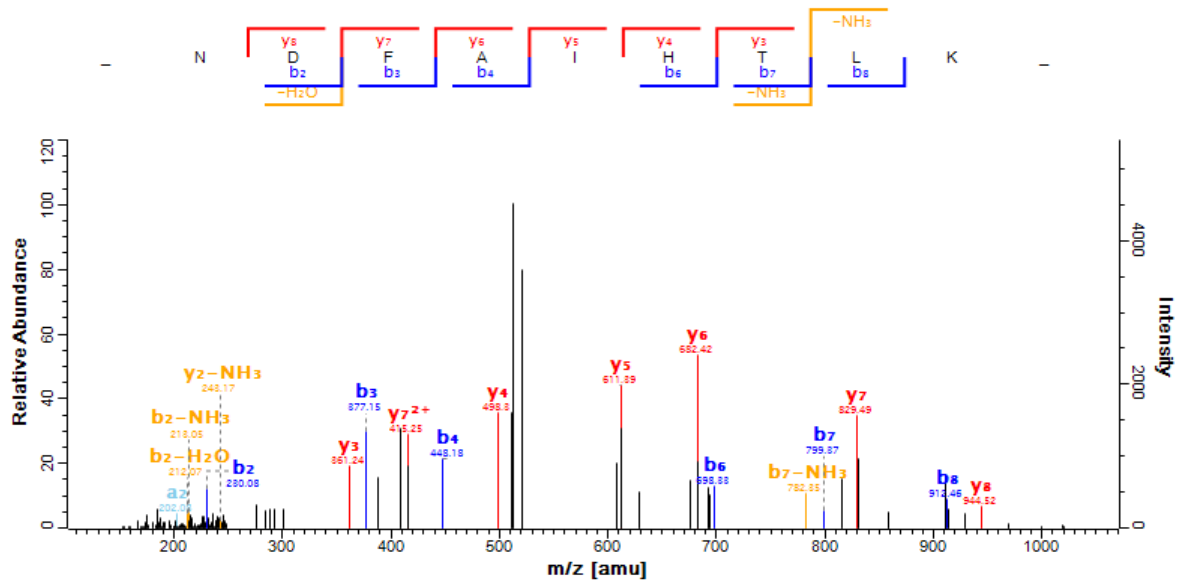

**Protein Group ID:** 1038

**Protein Accession Numbers:** F5GXR3; P20962; F5H7R9

**Gene Names:** PTMS

**Peptide Sequence:** SVEAAAELSAK

**Total Number of Spectra:** 13

**Number of Replicates (out of 8):** 7

**Best Match Score:** 178.67

**Best Match Posterior Error Probability:** 5.88E-24

**Best Match Spectrum:**

|                    |           |                  |                                   |
|--------------------|-----------|------------------|-----------------------------------|
| <b>Scan number</b> | 18256     | <b>Raw file</b>  | A549-US-WT-top20CID-Elite-2ug-B13 |
| <b>Method</b>      | ITMS; CID | <b>Genenames</b> | PTMS                              |

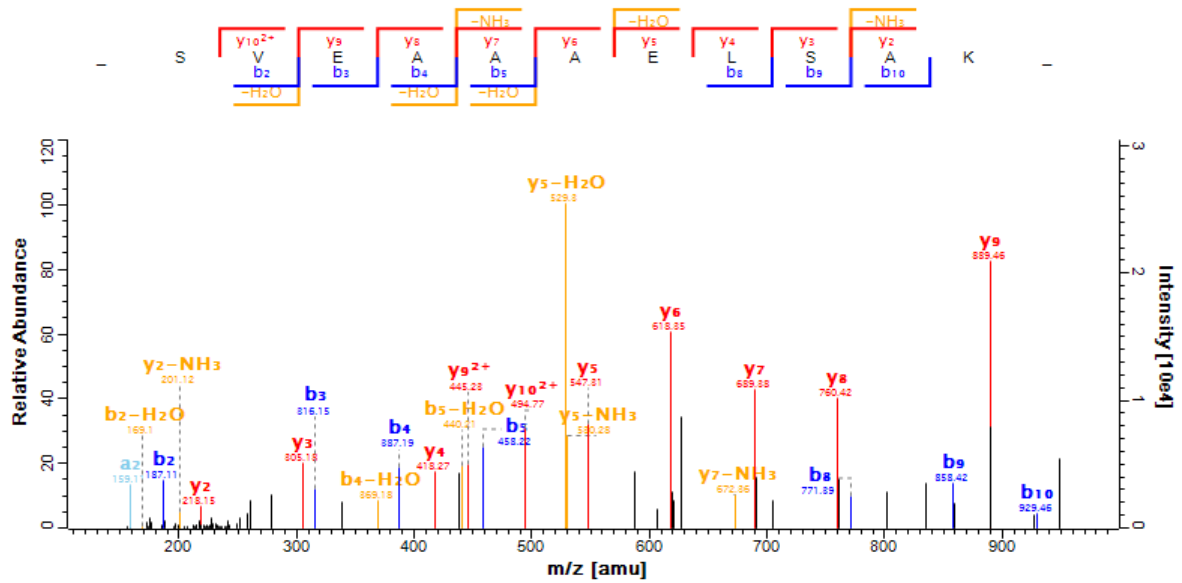

**Protein Group ID:** 1040

**Protein Accession Numbers:** H0Y599; Q8N1I0-3; Q8N1I0; Q8N1I0-2; H0Y7H7; F5GXW1

**Gene Names:** DOCK4

**Peptide Sequence:** EYILSHPEDGEK

**Total Number of Spectra:** 1

**Number of Replicates (out of 8):** 1

**Best Match Score:** 98.407

**Best Match Posterior Error Probability:** 0.0031807

**Best Match Spectrum:**

**Scan number** 17921      **Raw file** A549-US-WT-top20CID-Elite-2ug-B12  
**Method** ITMS; CID      **Genenames** DOCK4

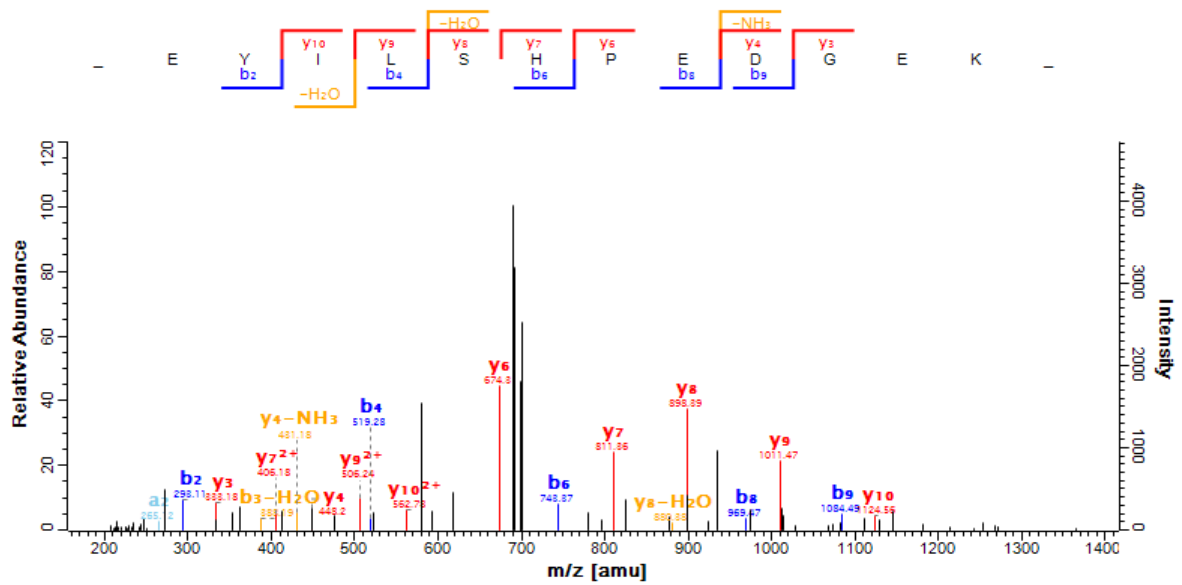

**Protein Group ID:** 1043

**Protein Accession Numbers:** P13051; P13051-2; F5GYA2; Q68DM5

**Gene Names:** UNG;DKFZp781L1143

**Peptide Sequence:** KAPAGQEEPGETPTSPSSPLSAELQDR

**Total Number of Spectra:** 3

**Number of Replicates (out of 8):** 3

**Best Match Score:** 66.137

**Best Match Posterior Error Probability:** 0.0017634

**Best Match Spectrum:**

**Scan number** 33721      **Raw file** A549-US-Mock-top20CID-Elite-2ug-B14  
**Method** ITMS; CID      **Genenames** UNG;DKFZp781L1143

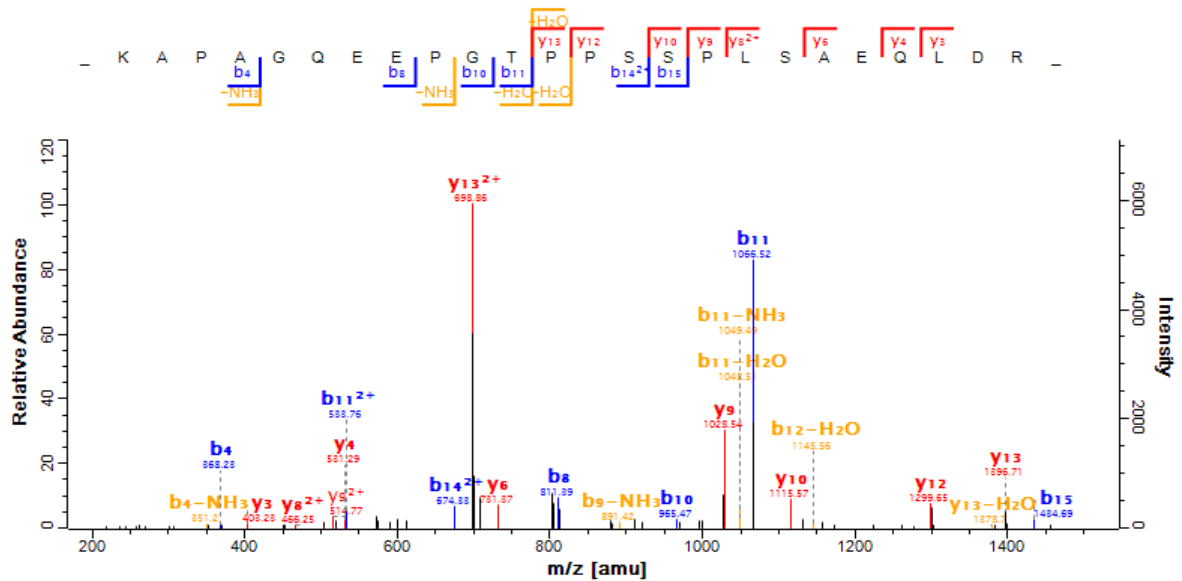

**Protein Group ID:** 1044

**Protein Accession Numbers:** O14519; F5GYA4; F5GZF0

**Gene Names:** CDK2AP1

**Peptide Sequence:** YAELLAIIIEELGK

**Total Number of Spectra:** 7

**Number of Replicates (out of 8):** 7

**Best Match Score:** 157.52

**Best Match Posterior Error Probability:** 3.20E-09

**Best Match Spectrum:**

|                    |           |                  |                                     |
|--------------------|-----------|------------------|-------------------------------------|
| <b>Scan number</b> | 89717     | <b>Raw file</b>  | A549-US-Mock-top20CID-Elite-2ug-B11 |
| <b>Method</b>      | ITMS; CID | <b>Genenames</b> | CDK2AP1                             |

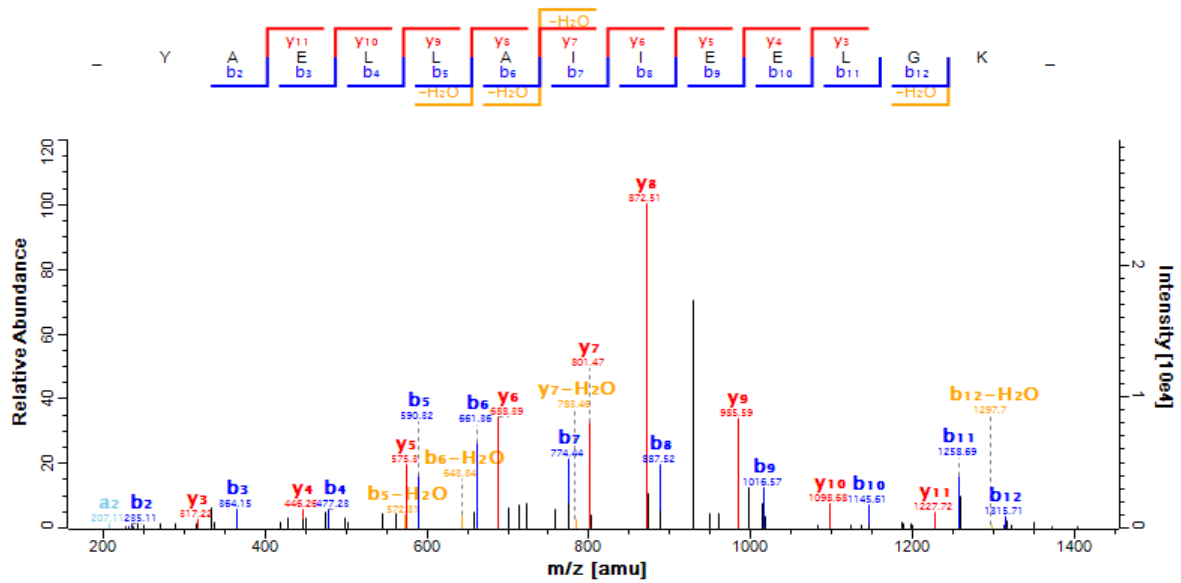

**Protein Group ID:** 1052

**Protein Accession Numbers:** Q8N9N5; F5GZM0; Q8N9N5-5; Q8N9N5-4; Q8N9N5-2; Q8N9N5-6; J3QTH5; Q8N9N5-3

**Gene Names:** BANP

**Peptide Sequence:** EVQAVSNLSGQK

**Total Number of Spectra:** 1

**Number of Replicates (out of 8):** 1

**Best Match Score:** 107.99

**Best Match Posterior Error Probability:** 0.0025157

**Best Match Spectrum:**

|                    |           |                  |                                     |
|--------------------|-----------|------------------|-------------------------------------|
| <b>Scan number</b> | 14670     | <b>Raw file</b>  | A549-US-Mock-top20CID-Elite-2ug-B11 |
| <b>Method</b>      | ITMS; CID | <b>Genenames</b> | BANP                                |

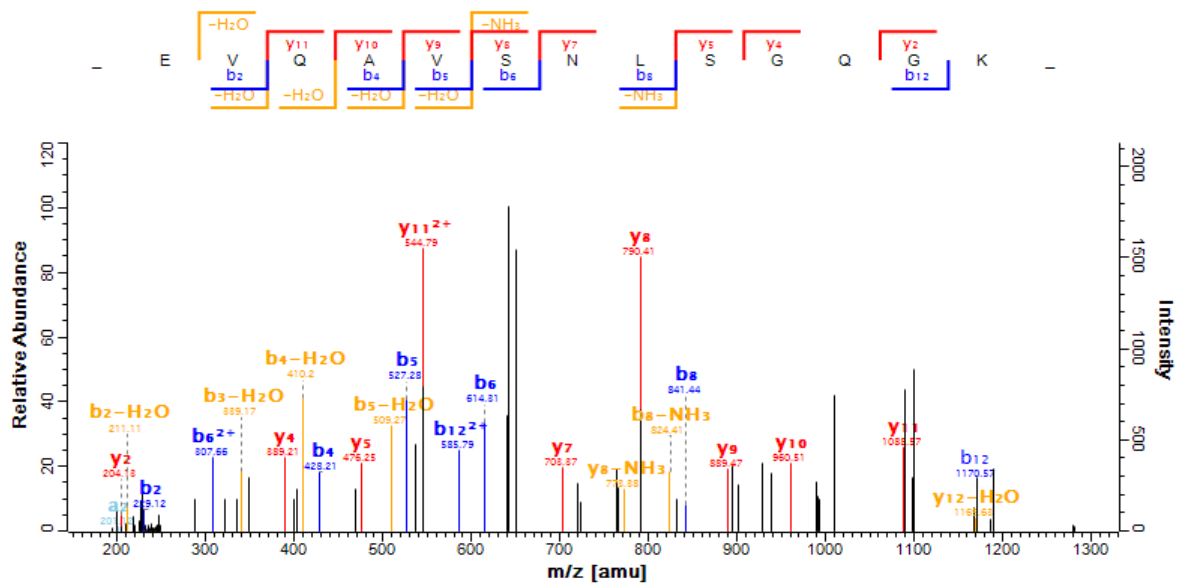

**Protein Group ID:** 1056

**Protein Accession Numbers:** Q06481; H7BXI4; Q06481-3; Q06481-2; Q06481-4; F5GZY0; F5H845; Q06481-5

**Gene Names:** APLP2

**Peptide Sequence:** MQNHGYENPTYK

**Total Number of Spectra:** 3

**Number of Replicates (out of 8):** 3

**Best Match Score:** 84.169

**Best Match Posterior Error Probability:** 0.0024149

**Best Match Spectrum:**

|                    |           |                  |                                     |
|--------------------|-----------|------------------|-------------------------------------|
| <b>Scan number</b> | 9206      | <b>Raw file</b>  | A549-US-Mock-top20CID-Elite-2ug-B13 |
| <b>Method</b>      | ITMS: CID | <b>Genenames</b> | APLP2                               |

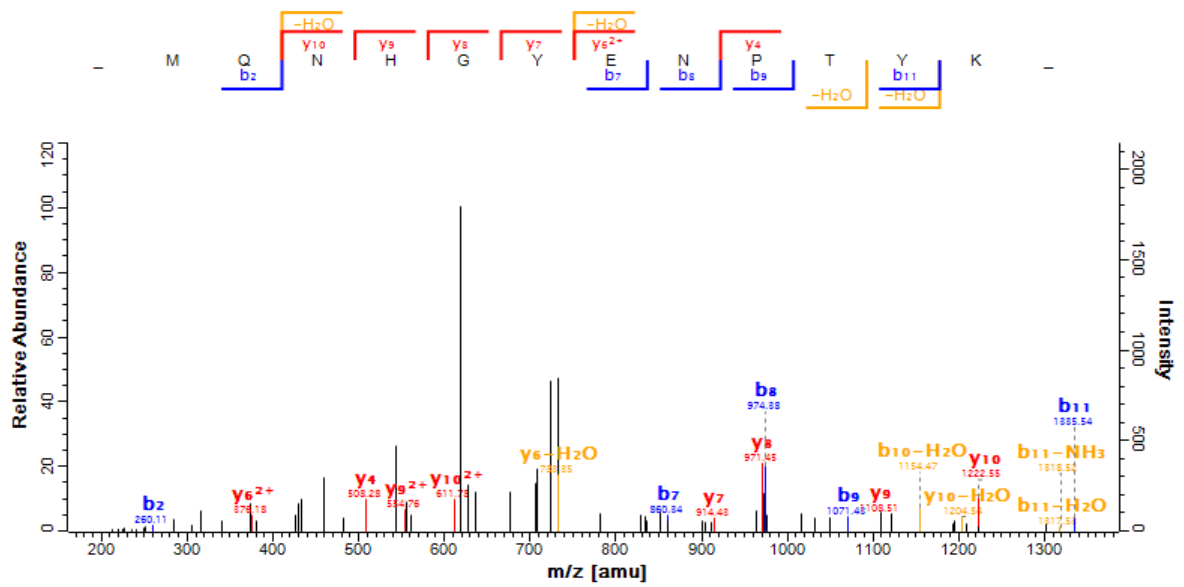

**Protein Group ID:** 1060

**Protein Accession Numbers:** O14576; O14576-2; G5E9K1; O14576-3; F5H050

**Gene Names:** DYNC111

**Peptide Sequence:** TPLSAAHTHPVYCVNVVGTQNAHNLITVSTDGK

**Total Number of Spectra:** 2

**Number of Replicates (out of 8):** 2

**Best Match Score:** 57.629

**Best Match Posterior Error Probability:** 0.00018633

**Best Match Spectrum:**

**Scan number** 53470      **Raw file** A549-US-Mock-top20CID-Elite-2ug-B13  
**Method** ITMS; CID      **Genenames** DYNC111

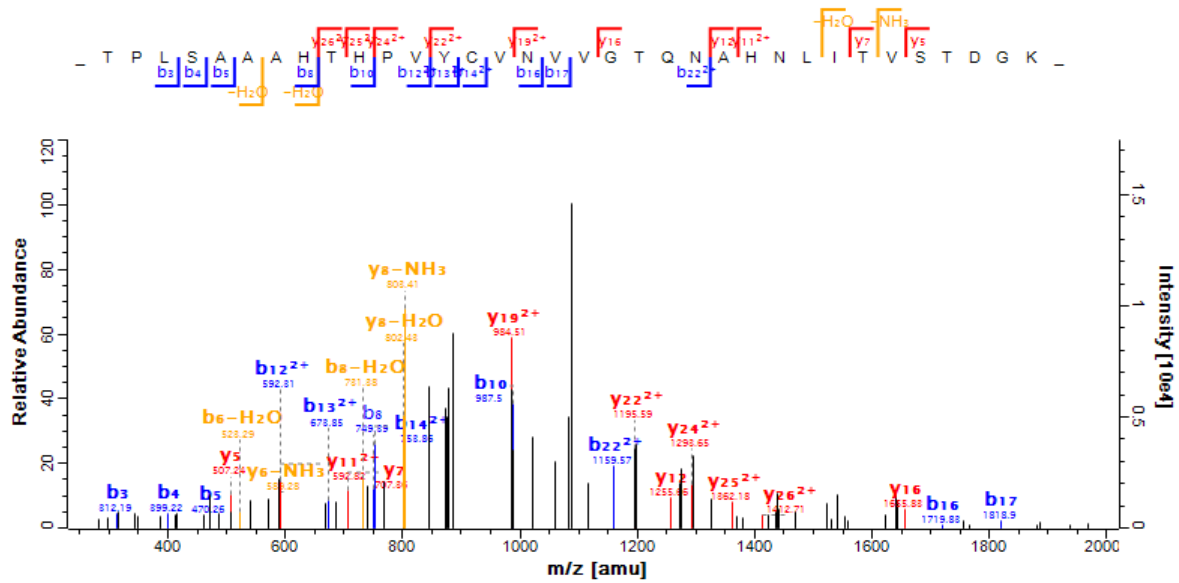



**Protein Group ID:** 1071

**Protein Accession Numbers:** J3KNJ9; Q2KHT4-6; Q2KHT4-7; G3XAB9; F5H0V9; F5H134

**Gene Names:** GSG1

**Peptide Sequence:** SDPSQLTQNVCLTQEMELSKAFSGQR

**Total Number of Spectra:** 2

**Number of Replicates (out of 8):** 2

**Best Match Score:** 87.772

**Best Match Posterior Error Probability:** 0.00014004

**Best Match Spectrum:**

|                    |           |                  |                                     |
|--------------------|-----------|------------------|-------------------------------------|
| <b>Scan number</b> | 92065     | <b>Raw file</b>  | A549-US-Mock-top20CID-Elite-2ug-B13 |
| <b>Method</b>      | ITMS; CID | <b>Genenames</b> | GSG1                                |

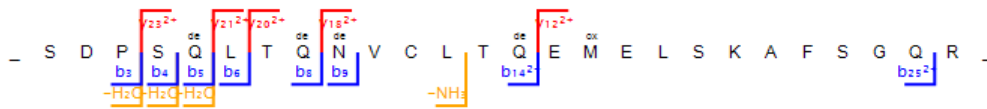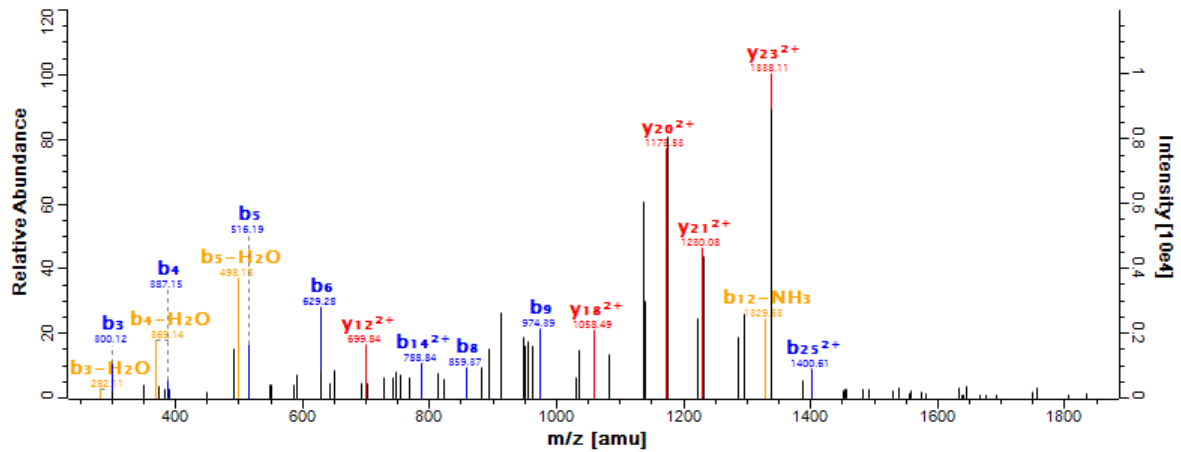

**Protein Group ID:** 1072  
**Protein Accession Numbers:** F5H0X2; Q96MK2  
**Gene Names:** FAM65C  
**Peptide Sequence:** VLSCPATLLNQLK  
**Total Number of Spectra:** 1  
**Number of Replicates (out of 8):** 1  
**Best Match Score:** 103.91  
**Best Match Posterior Error Probability:** 0.0024983  
**Best Match Spectrum:**

**Scan number** 71385      **Raw file** A549-US-Mock-top20CID-Elite-2ug-B12  
**Method** ITMS; CID      **Genenames** FAM65C

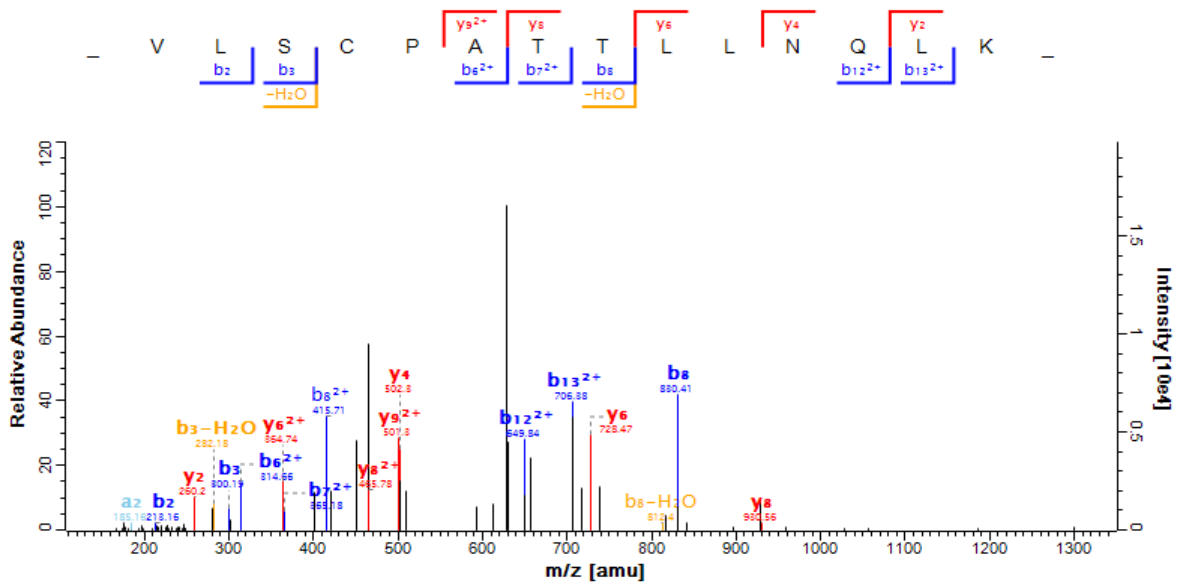

**Protein Group ID:** 1073  
**Protein Accession Numbers:** Q15773; F5H0Y3  
**Gene Names:** MLF2  
**Peptide Sequence:** VYQETSEMR  
**Total Number of Spectra:** 6  
**Number of Replicates (out of 8):** 6  
**Best Match Score:** 125.74  
**Best Match Posterior Error Probability:** 0.00023104  
**Best Match Spectrum:**

**Scan number** 8227      **Raw file** A549-US-Mock-top20CID-Elite-2ug-B13  
**Method** ITMS; CID      **Genenames** MLF2

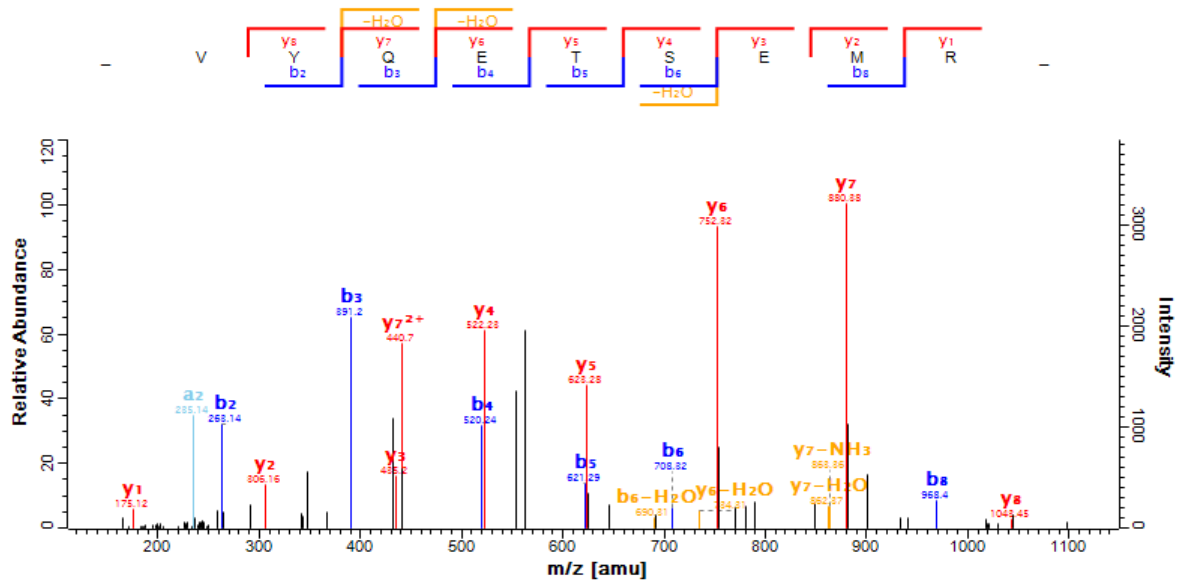

**Protein Group ID:** 1077

**Protein Accession Numbers:** Q9H9H4; F5H4M0; F5H1F6

**Gene Names:** VPS37B

**Peptide Sequence:** IEEDTENMAEK

**Total Number of Spectra:** 6

**Number of Replicates (out of 8):** 5

**Best Match Score:** 105.2

**Best Match Posterior Error Probability:** 0.00033027

**Best Match Spectrum:**

|                    |           |                  |                                   |
|--------------------|-----------|------------------|-----------------------------------|
| <b>Scan number</b> | 9516      | <b>Raw file</b>  | A549-US-WT-top20CID-Elite-2ug-B11 |
| <b>Method</b>      | ITMS; CID | <b>Genenames</b> | VPS37B                            |

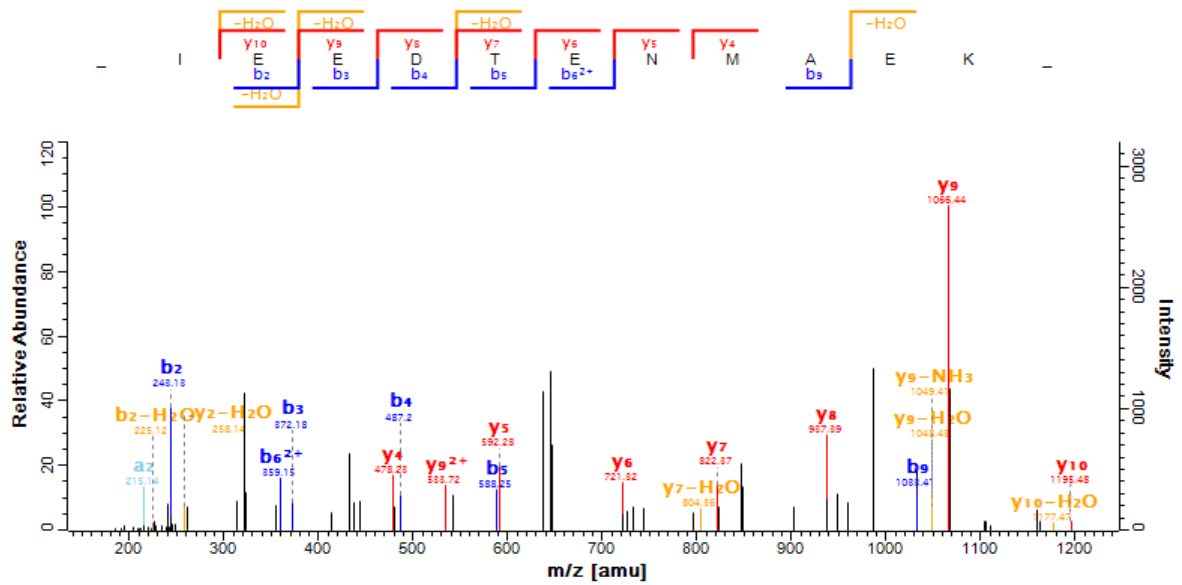

**Protein Group ID:** 1086  
**Protein Accession Numbers:** F5H1Z7; Q99985  
**Gene Names:** SEMA3C  
**Peptide Sequence:** IIATSQGLLIR  
**Total Number of Spectra:** 1  
**Number of Replicates (out of 8):** 1  
**Best Match Score:** 111.52  
**Best Match Posterior Error Probability:** 0.00013349  
**Best Match Spectrum:**

**Scan number** 41637      **Raw file** A549-US-Mock-top20CID-Elite-2ug-B11  
**Method** ITMS; CID      **Genenames** SEMA3C

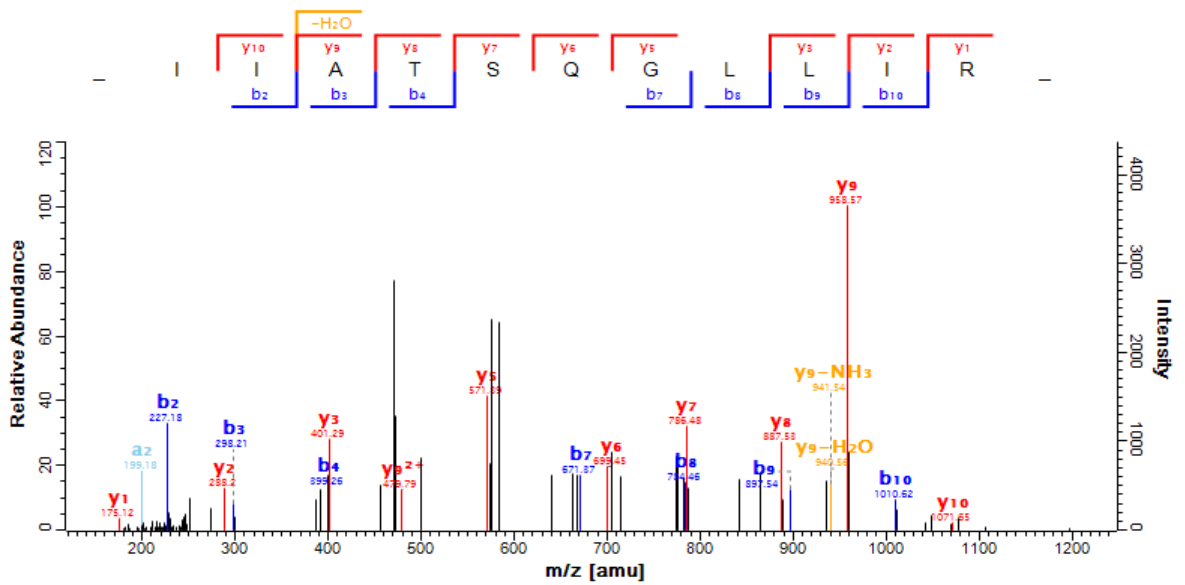

**Protein Group ID:** 1093

**Protein Accession Numbers:** F5H301; Q9UDY2; Q9UDY2-3; F5H886

**Gene Names:** TJP2

**Peptide Sequence:** SNPSAVAGNETPGASTK

**Total Number of Spectra:** 1

**Number of Replicates (out of 8):** 1

**Best Match Score:** 87.088

**Best Match Posterior Error Probability:** 0.00053445

**Best Match Spectrum:**

**Scan number** 9999      **Raw file** A549-US-WT-top20CID-Elite-2ug-B13  
**Method** ITMS; CID      **Genenames** TJP2

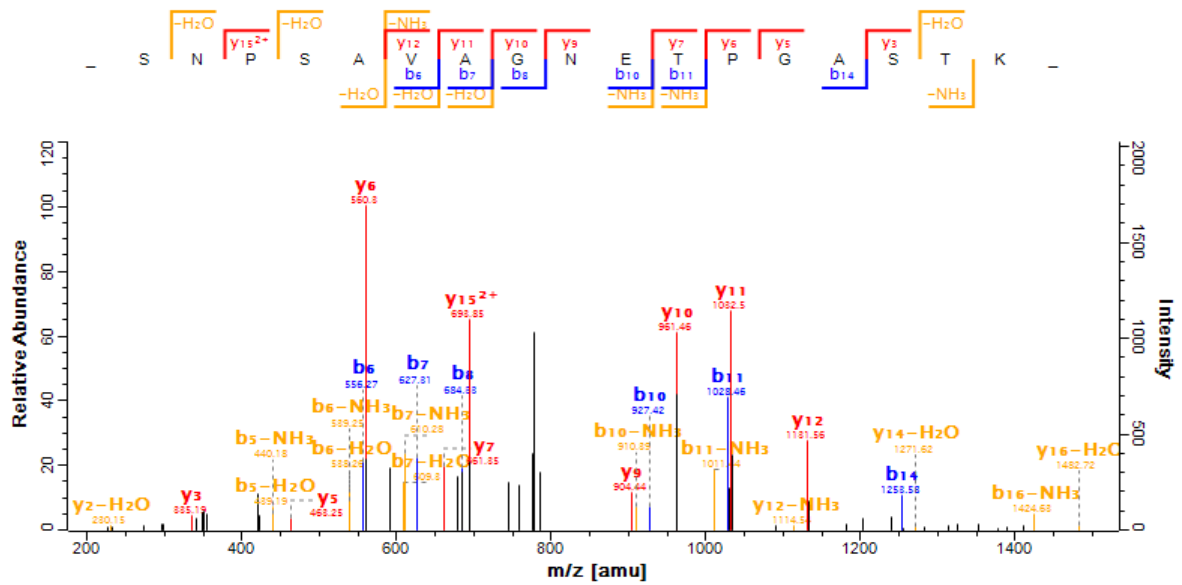

**Protein Group ID:** 1095

**Protein Accession Numbers:** P34059; F5H325; H3BP66

**Gene Names:** GALNS

**Peptide Sequence:** HGFDEWF<sup>+</sup>GSPNCHFGPYDNK

**Total Number of Spectra:** 4

**Number of Replicates (out of 8):** 4

**Best Match Score:** 180.78

**Best Match Posterior Error Probability:** 8.97E-24

**Best Match Spectrum:**

**Scan number** 55075      **Raw file** A549-US-Mock-top20CID-Elite-2ug-B14  
**Method** ITMS; CID      **Genenames** GALNS

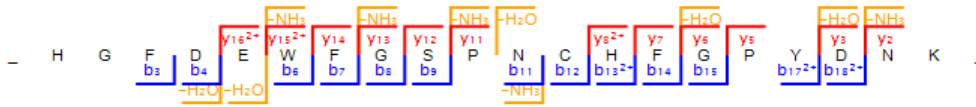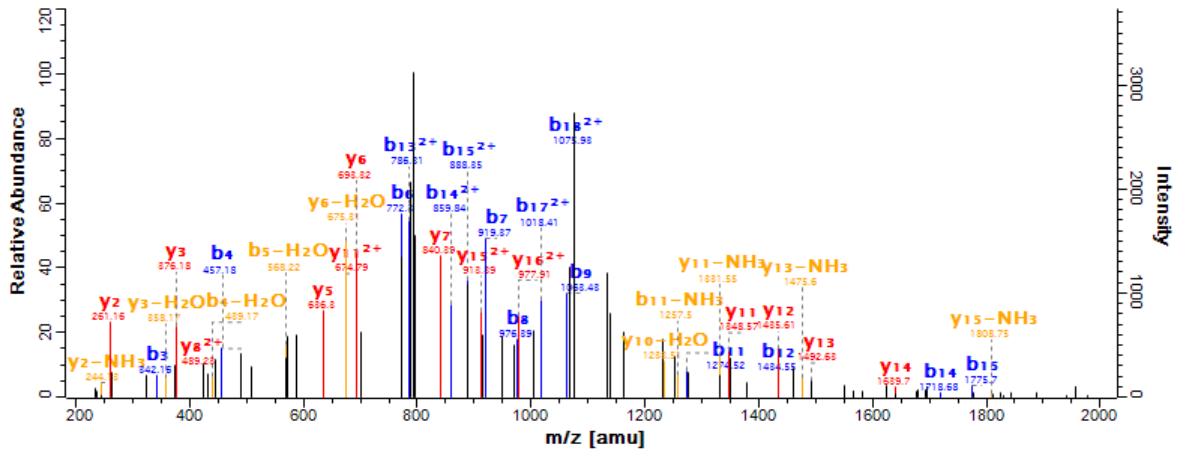

**Protein Group ID:** 1105

**Protein Accession Numbers:** Q8IVH8; Q8IVH8-2; Q8IVH8-3; F5H5A3

**Gene Names:** MAP4K3

**Peptide Sequence:** GHVAHLEDDEGDDDESK

**Total Number of Spectra:** 3

**Number of Replicates (out of 8):** 2

**Best Match Score:** 150.39

**Best Match Posterior Error Probability:** 1.84E-06

**Best Match Spectrum:**

**Scan number** 4979      **Raw file** A549-US-WT-top20CID-Elite-2ug-B11  
**Method** ITMS; CID      **Genenames** MAP4K3

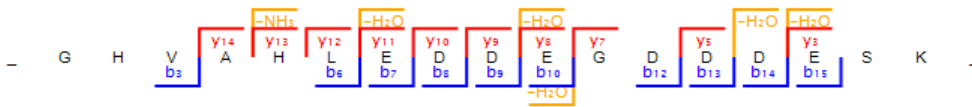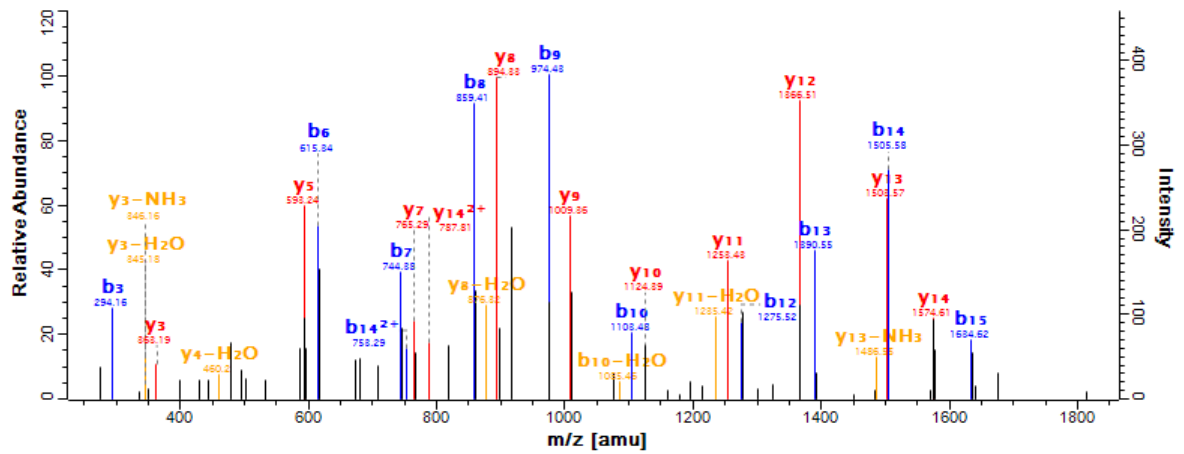



**Protein Group ID:** 1110

**Protein Accession Numbers:** Q5VT25-6; Q5VT25-2; Q5VT25; Q5VT25-5; F5H5N0;  
Q5VT25-4; Q5VT25-3; H0Y5V1; H0Y7V8; H0Y6V3; H0Y6R0

**Gene Names:** CDC42BPA

**Peptide Sequence:** VTASQLSASNNK

**Total Number of Spectra:** 1

**Number of Replicates (out of 8):** 1

**Best Match Score:** 90.861

**Best Match Posterior Error Probability:** 0.0013453

**Best Match Spectrum:**

|                    |           |                  |                                   |
|--------------------|-----------|------------------|-----------------------------------|
| <b>Scan number</b> | 7403      | <b>Raw file</b>  | A549-US-WT-top20CID-Elite-2ug-B13 |
| <b>Method</b>      | ITMS; CID | <b>Genenames</b> | CDC42BPA                          |

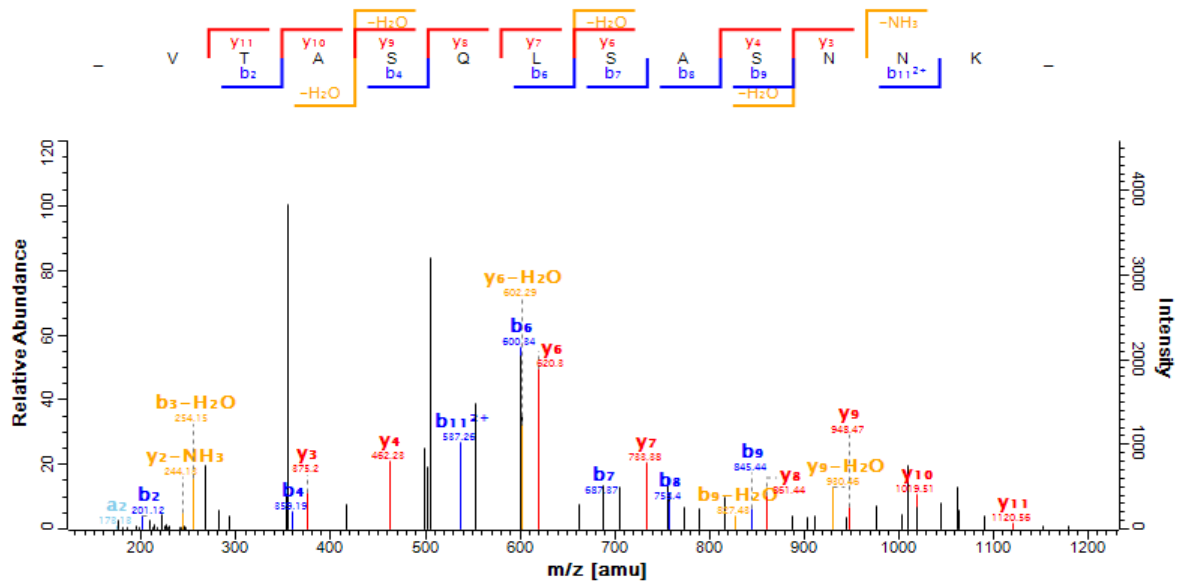

**Protein Group ID:** 1112  
**Protein Accession Numbers:** F5H5R8; P18440  
**Gene Names:** NAT1  
**Peptide Sequence:** LDLETLTDILQHQR  
**Total Number of Spectra:** 2  
**Number of Replicates (out of 8):** 2  
**Best Match Score:** 87.001  
**Best Match Posterior Error Probability:** 0.0010655  
**Best Match Spectrum:**

|                    |           |                  |                                   |
|--------------------|-----------|------------------|-----------------------------------|
| <b>Scan number</b> | 86793     | <b>Raw file</b>  | A549-US-WT-top20CID-Elite-2ug-B11 |
| <b>Method</b>      | ITMS; CID | <b>Genenames</b> | NAT1                              |

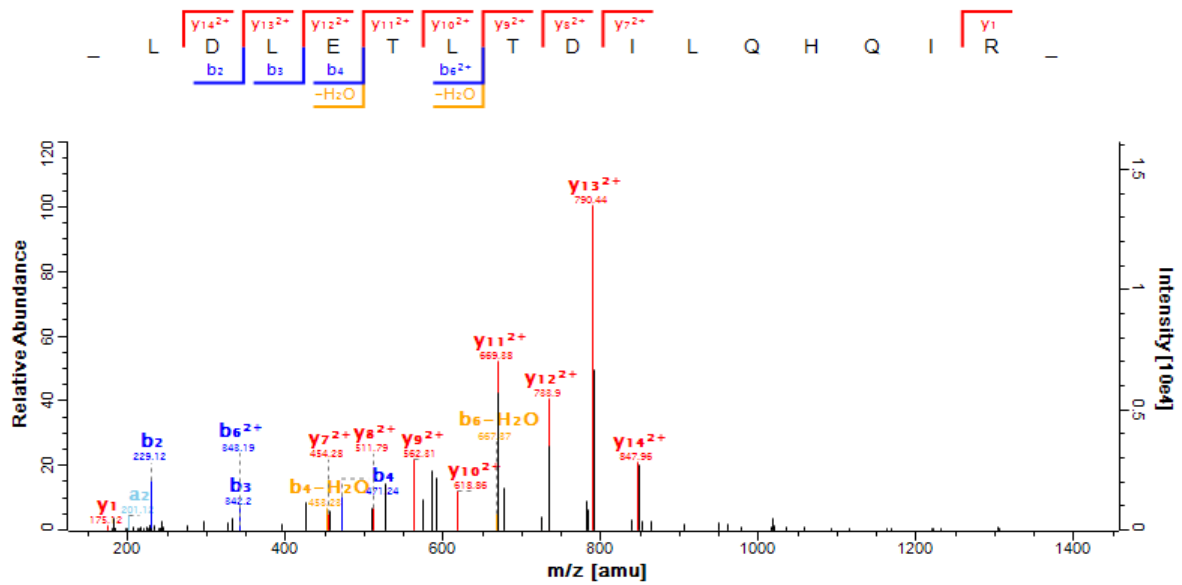

**Protein Group ID:** 1114

**Protein Accession Numbers:** F5H607; Q9NNX1; Q9NNX1-2; Q9NNX1-3

**Gene Names:** TUFT1

**Peptide Sequence:** SEVQYIQEAR

**Total Number of Spectra:** 1

**Number of Replicates (out of 8):** 1

**Best Match Score:** 95.477

**Best Match Posterior Error Probability:** 0.0012728

**Best Match Spectrum:**

**Scan number** 20773      **Raw file** A549-US-Mock-top20CID-Elite-2ug-B11  
**Method** ITMS; CID      **Genenames** TUFT1

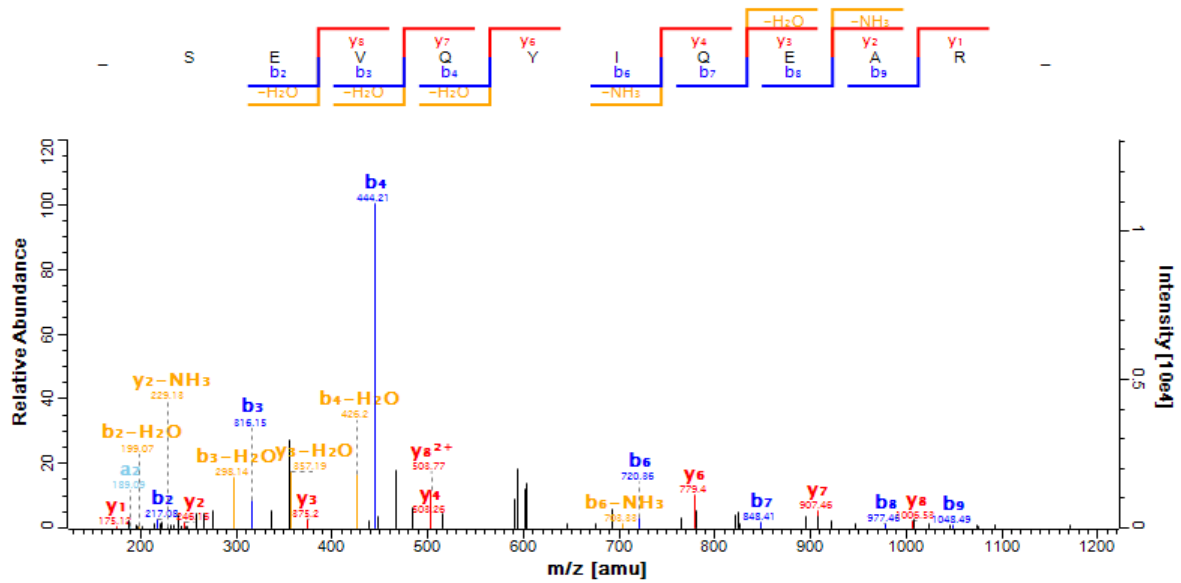

**Protein Group ID:** 1124

**Protein Accession Numbers:** F5H759; Q9UHW5-2; Q9UHW5; H0YHZ5

**Gene Names:** GPN3

**Peptide Sequence:** FLDPDPMYSLLEDSTSDLR

**Total Number of Spectra:** 7

**Number of Replicates (out of 8):** 7

**Best Match Score:** 179.46

**Best Match Posterior Error Probability:** 7.09E-16

**Best Match Spectrum:**

**Scan number** 82974      **Raw file** A549-US-WT-top20CID-Elite-2ug-B14  
**Method** ITMS; CID      **Genenames** GPN3

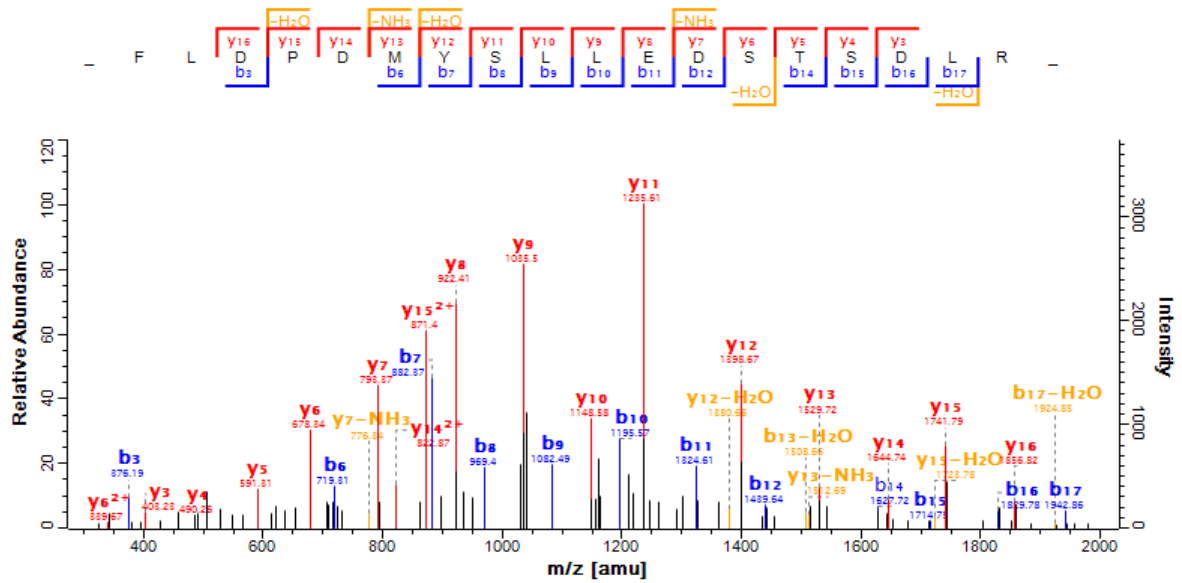

**Protein Group ID:** 1129  
**Protein Accession Numbers:** O60669; F5H843  
**Gene Names:** SLC16A7  
**Peptide Sequence:** VSNAQSVTSER  
**Total Number of Spectra:** 6  
**Number of Replicates (out of 8):** 6  
**Best Match Score:** 168.98  
**Best Match Posterior Error Probability:** 1.01E-06  
**Best Match Spectrum:**

**Scan number** 4834      **Raw file** A549-US-Mock-top20CID-Elite-2ug-B12  
**Method** ITMS; CID      **Genenames** SLC16A7

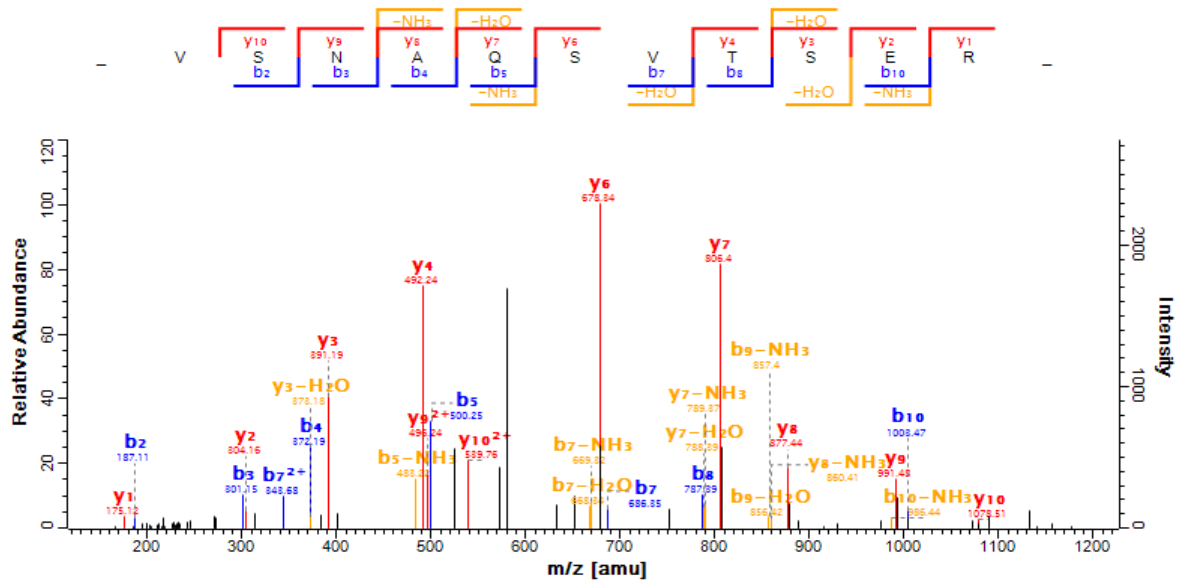

**Protein Group ID:** 1133

**Protein Accession Numbers:** Q9Y2V7; Q9Y2V7-2; F5H8M2; H0YGX8

**Gene Names:** COG6

**Peptide Sequence:** SLAINEEFVSIFK

**Total Number of Spectra:** 1

**Number of Replicates (out of 8):** 1

**Best Match Score:** 99.531

**Best Match Posterior Error Probability:** 0.00051937

**Best Match Spectrum:**

**Scan number** 79220      **Raw file** A549-US-WT-top20CID-Elite-2ug-B12  
**Method** ITMS; CID      **Genenames** COG6

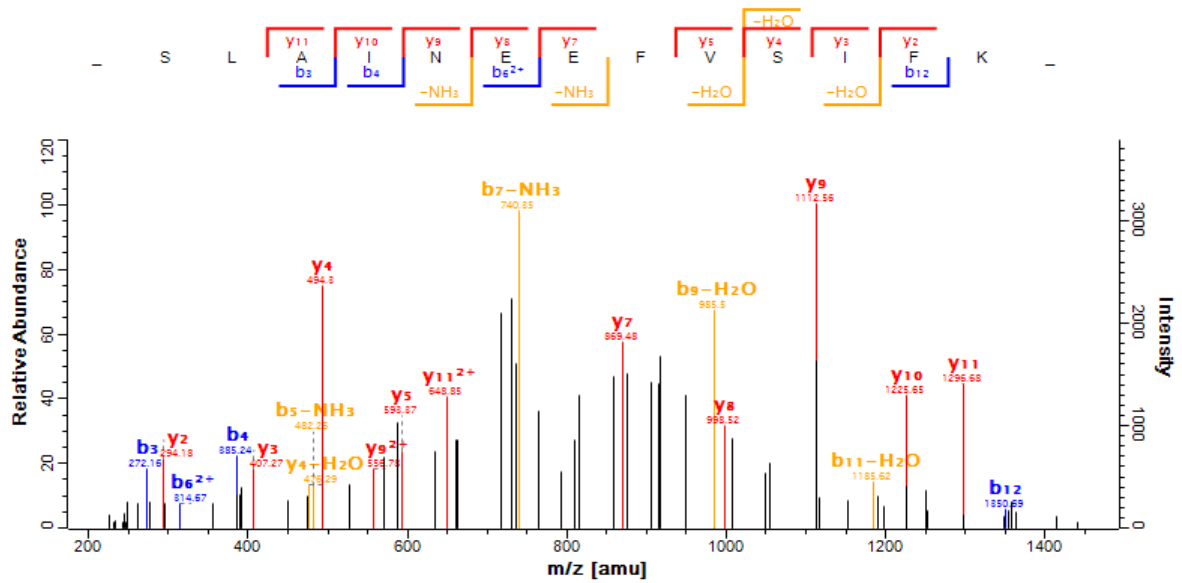

**Protein Group ID:** 1141

**Protein Accession Numbers:** P78537; F8VP73; P78537-2; F8W036; G8JLQ3; F8W606; F8W099

**Gene Names:** BLOC1S1

**Peptide Sequence:** TLQVQAQFAK

**Total Number of Spectra:** 2

**Number of Replicates (out of 8):** 2

**Best Match Score:** 89.805

**Best Match Posterior Error Probability:** 0.001498

**Best Match Spectrum:**

|                    |           |                  |                                     |
|--------------------|-----------|------------------|-------------------------------------|
| <b>Scan number</b> | 30825     | <b>Raw file</b>  | A549-US-Mock-top20CID-Elite-2ug-B11 |
| <b>Method</b>      | ITMS; CID | <b>Genenames</b> | BLOC1S1                             |

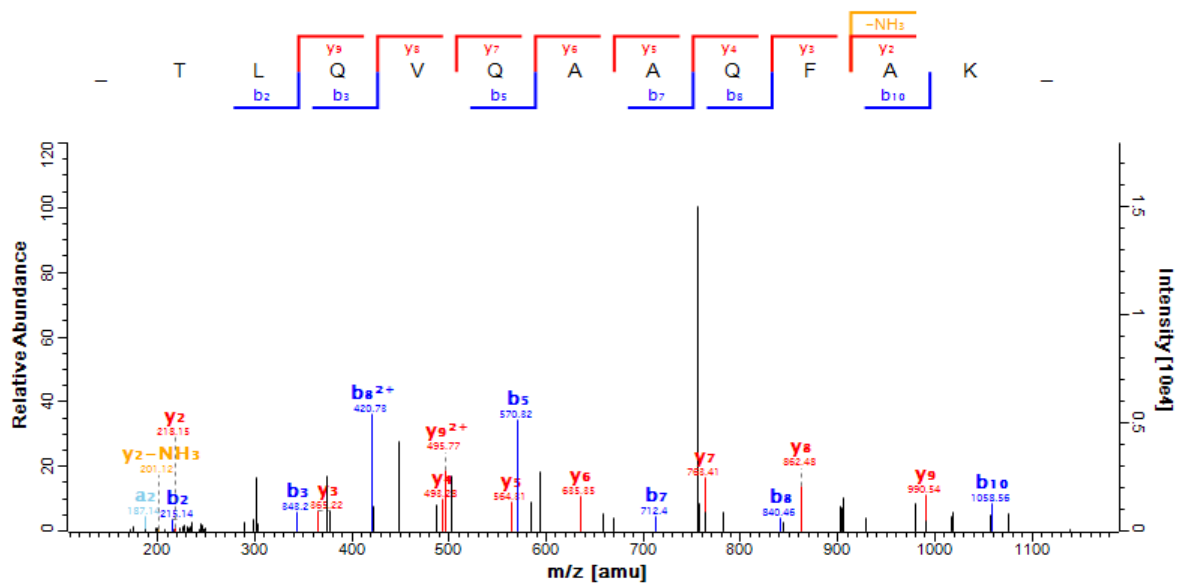





**Protein Group ID:** 1148

**Protein Accession Numbers:** F8VQY2; Q96RL1; Q96RL1-3; Q96RL1-2; Q96RL1-4

**Gene Names:** UIMC1

**Peptide Sequence:** SDSGTAAQTSLDK

**Total Number of Spectra:** 3

**Number of Replicates (out of 8):** 3

**Best Match Score:** 77.42

**Best Match Posterior Error Probability:** 0.0031607

**Best Match Spectrum:**

**Scan number** 20649      **Raw file** A549-US-Mock-top20CID-Elite-2ug-B11  
**Method** ITMS; CID      **Genenames** UIMC1

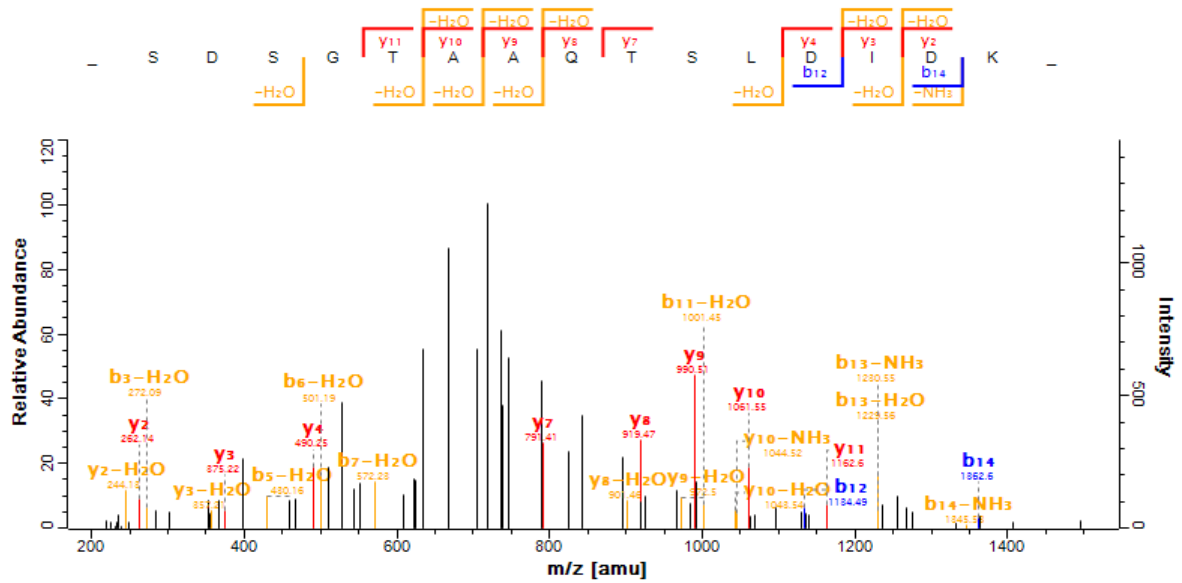

**Protein Group ID:** 1149

**Protein Accession Numbers:** J3KPX5; P51530; P51530-4; P51530-3; F8VR31; P51530-2

**Gene Names:** DNA2

**Peptide Sequence:** TVLSTGMDNR

**Total Number of Spectra:** 1

**Number of Replicates (out of 8):** 1

**Best Match Score:** 89.355

**Best Match Posterior Error Probability:** 0.0020617

**Best Match Spectrum:**

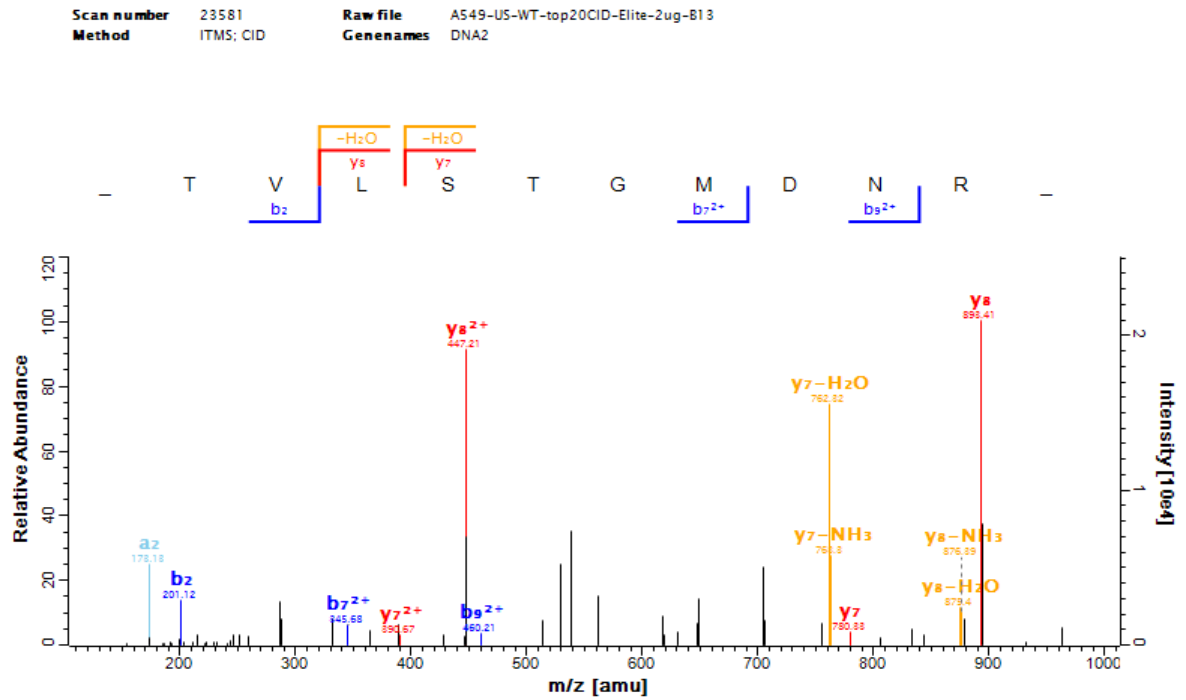

**Protein Group ID:** 1150  
**Protein Accession Numbers:** P25208; F8VSL3  
**Gene Names:** NFYB  
**Peptide Sequence:** ECVQECVSEFISFITSEASER  
**Total Number of Spectra:** 2  
**Number of Replicates (out of 8):** 2  
**Best Match Score:** 100.28  
**Best Match Posterior Error Probability:** 5.91E-05  
**Best Match Spectrum:**

**Scan number** 92902      **Raw file** A549-US-Mock-top20CID-Elite-2ug-B14  
**Method** ITMS; CID      **Genenames** NFYB

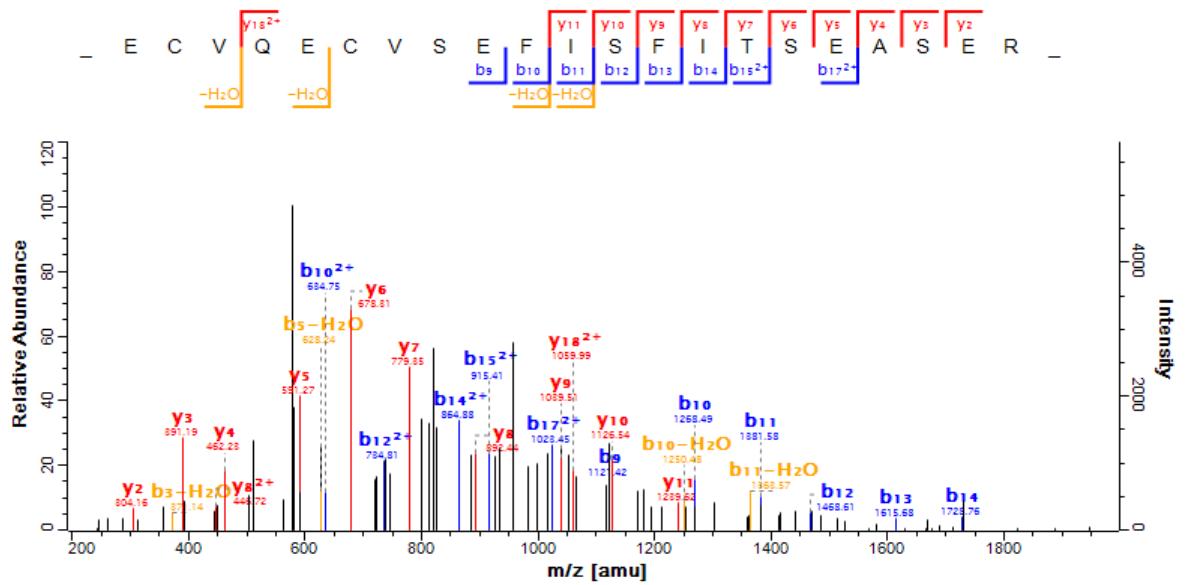

**Protein Group ID:** 1152

**Protein Accession Numbers:** P11802; F8VWX7; F8VTV8; F8VYH9; F8W1L8; Q96BE9; F8VYY1

**Gene Names:** CDK4

**Peptide Sequence:** VPNGGGGGGLPISTVR

**Total Number of Spectra:** 1

**Number of Replicates (out of 8):** 1

**Best Match Score:** 91.518

**Best Match Posterior Error Probability:** 0.0019387

**Best Match Spectrum:**

**Scan number** 34356      **Raw file** A549-US-Mock-top20CID-Elite-2ug-B12  
**Method** ITMS; CID      **Genenames** CDK4

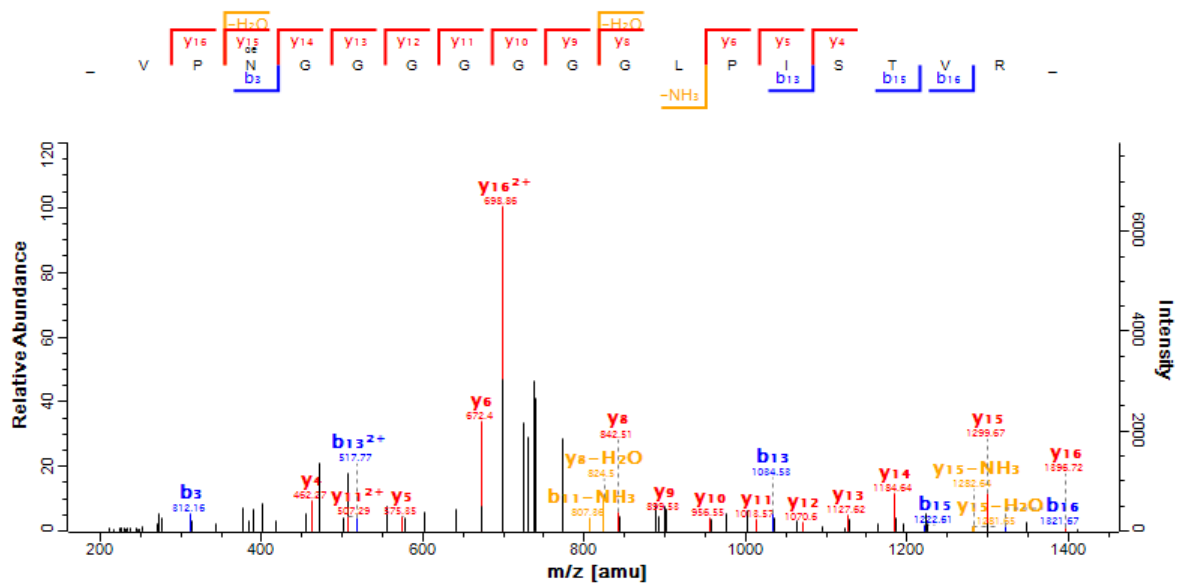

**Protein Group ID:** 1158  
**Protein Accession Numbers:** F8VUW4  
**Gene Names:** PLXNC1  
**Peptide Sequence:** MNRTVLFLGTGDGQLLK  
**Total Number of Spectra:** 1  
**Number of Replicates (out of 8):** 1  
**Best Match Score:** 103.88  
**Best Match Posterior Error Probability:** 0.0034095  
**Best Match Spectrum:**

**Scan number** 49042      **Raw file** A549-US-WT-top20CID-Elite-2ug-B13  
**Method** ITMS; CID      **Genenames** PLXNC1

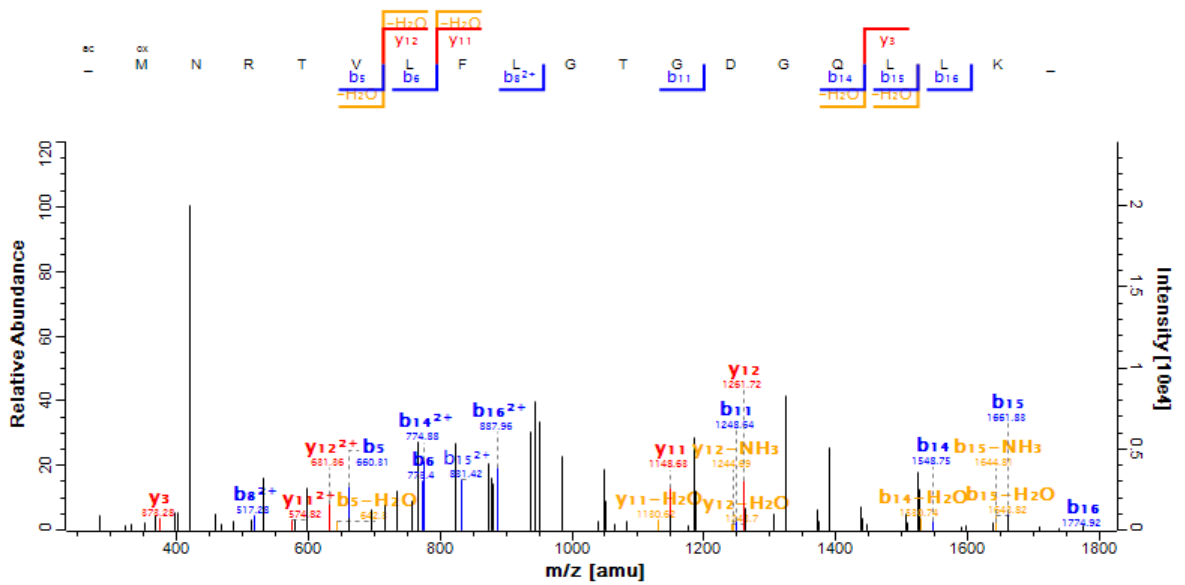

**Protein Group ID:** 1159

**Protein Accession Numbers:** F8VX10; Q9H9L4; F8VXI8; H0YIQ8; Q9H9L4-4; F8VUX5; H0YID1

**Gene Names:** KANSL2

**Peptide Sequence:** TELGSQTPESSR

**Total Number of Spectra:** 3

**Number of Replicates (out of 8):** 3

**Best Match Score:** 84.892

**Best Match Posterior Error Probability:** 0.0022498

**Best Match Spectrum:**

**Scan number** 7647      **Raw file** A549-US-WT-top20CID-Elite-2ug-B13  
**Method** ITMS; CID      **Genenames** KANSL2

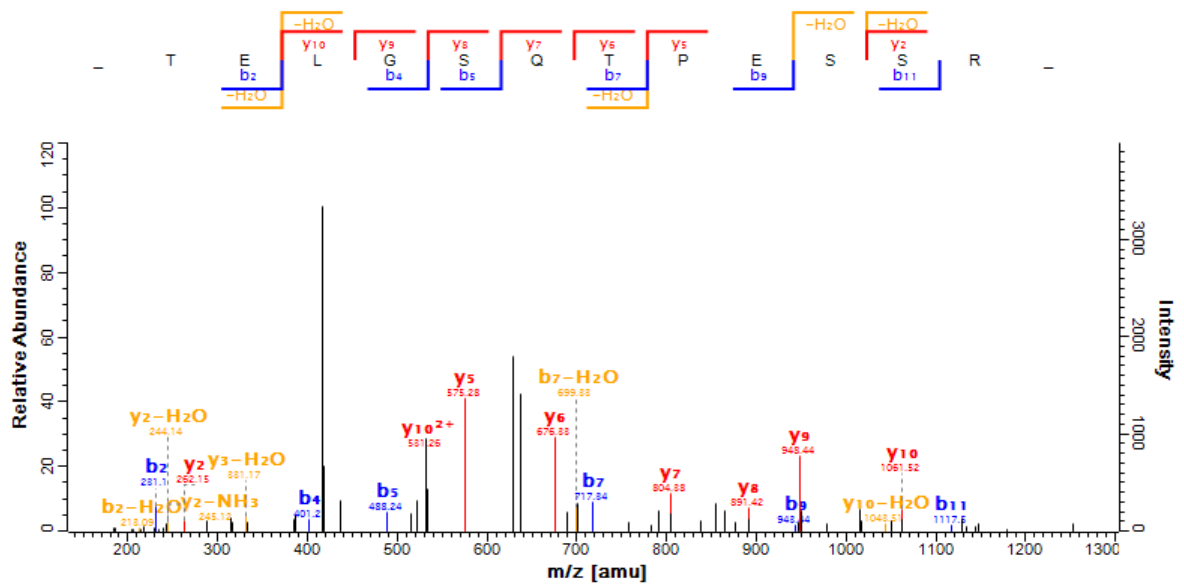

**Protein Group ID:** 1160  
**Protein Accession Numbers:** Q96QD8; F8VUY8  
**Gene Names:** SLC38A2  
**Peptide Sequence:** SHYADVDPENQNFLLLESNLGK  
**Total Number of Spectra:** 5  
**Number of Replicates (out of 8):** 5  
**Best Match Score:** 107.15  
**Best Match Posterior Error Probability:** 2.15E-05  
**Best Match Spectrum:**

**Scan number** 52264      **Raw file** A549-US-WT-top20CID-Elite-2ug-B14  
**Method** ITMS; CID      **Genenames** SLC38A2

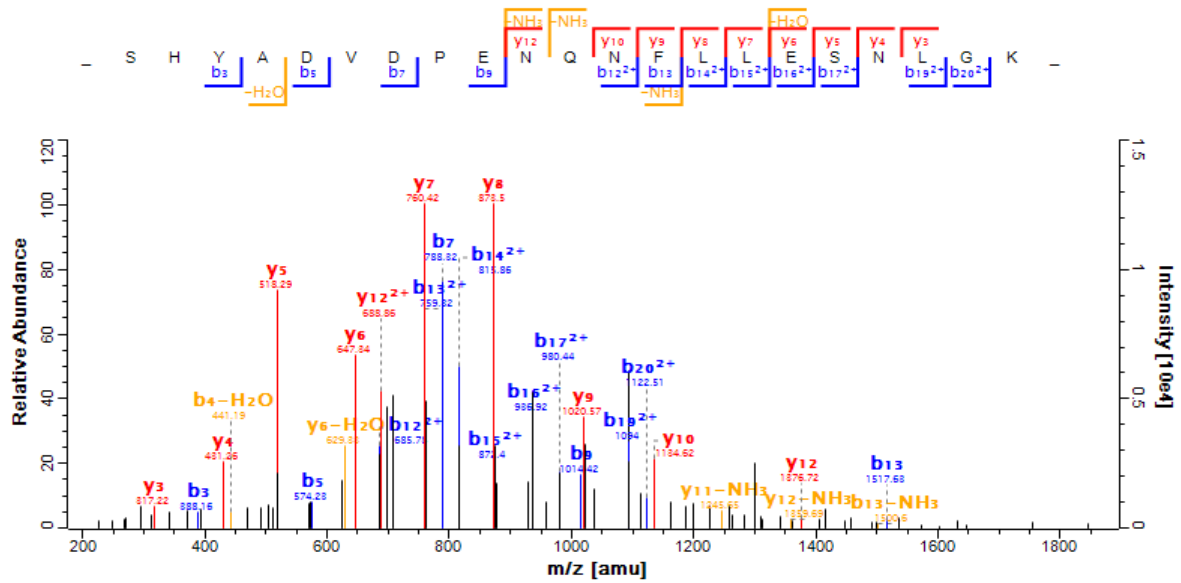

**Protein Group ID:** 1165

**Protein Accession Numbers:** F8VVS7; P55211; P55211-4; P55211-2; Q5JRU2

**Gene Names:** CASP9

**Peptide Sequence:** DHGFEVASTSPEDESPESNPEPDAATPFQEGLR

**Total Number of Spectra:** 1

**Number of Replicates (out of 8):** 1

**Best Match Score:** 75.717

**Best Match Posterior Error Probability:** 9.07E-08

**Best Match Spectrum:**

**Scan number** 50822      **Raw file** A549-US-Mock-top20CID-Elite-2ug-B12  
**Method** ITMS; CID      **Genenames** CASP9

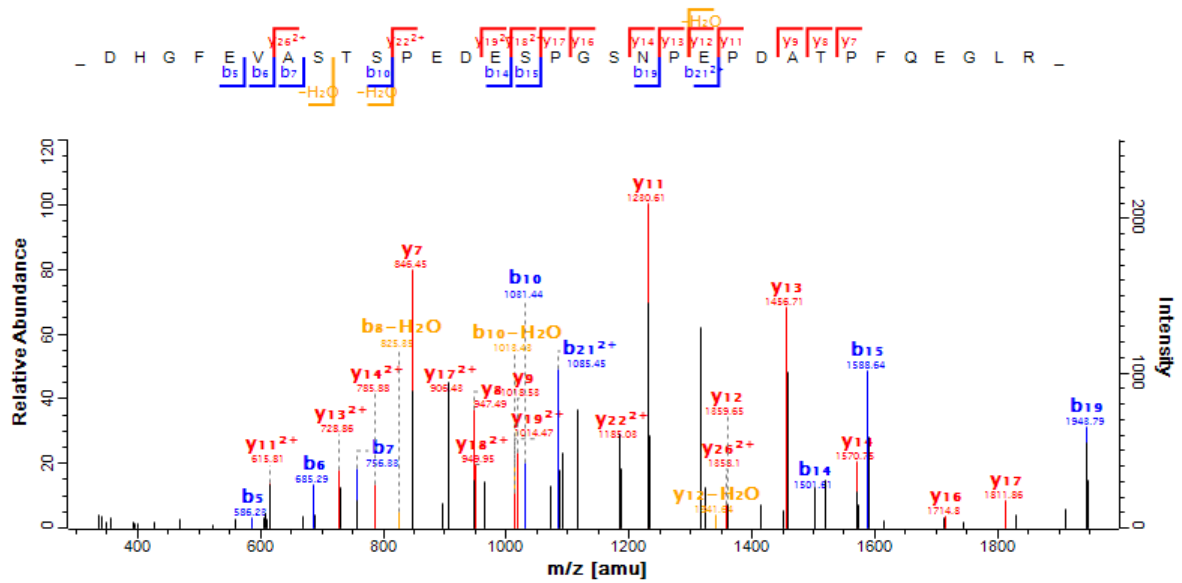



**Protein Group ID:** 1171

**Protein Accession Numbers:** Q8TBF4; G3V1V1; F8VXY6

**Gene Names:** ZCRB1

**Peptide Sequence:** GVAFILFDK

**Total Number of Spectra:** 2

**Number of Replicates (out of 8):** 1

**Best Match Score:** 103.26

**Best Match Posterior Error Probability:** 0.0023218

**Best Match Spectrum:**

**Scan number** 77944      **Raw file** A549-US-Mock-top20CID-Elite-2ug-B14  
**Method** ITMS; CID      **Genenames** ZCRB1

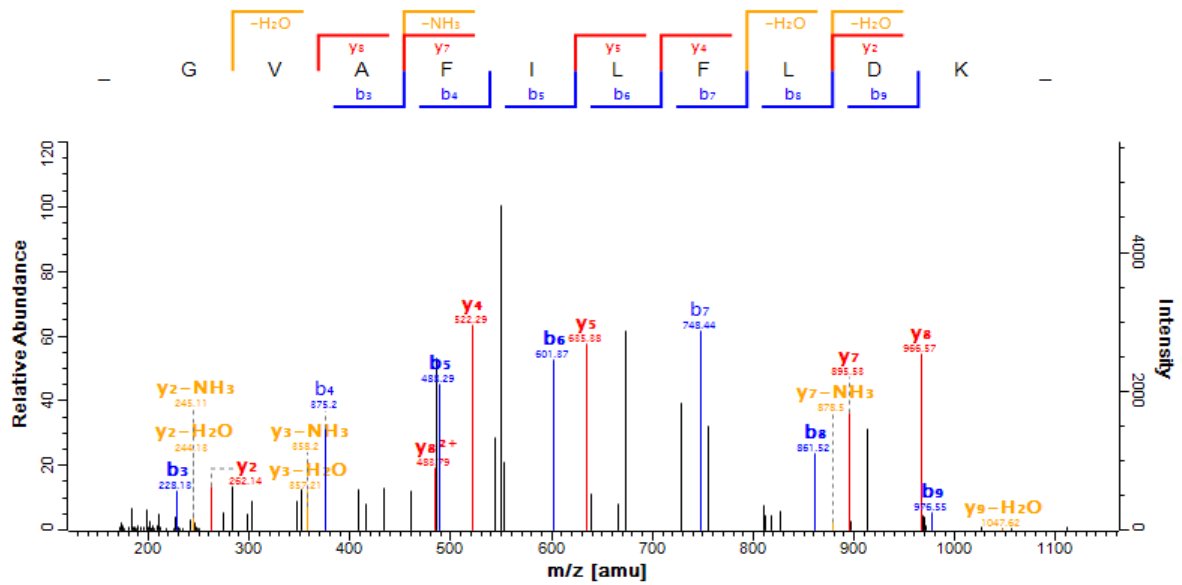

**Protein Group ID:** 1172

**Protein Accession Numbers:** Q6ZV73; Q6ZV73-2; F8VY01

**Gene Names:** FGD6

**Peptide Sequence:** SSQLGDTTTGHLSSGEQK

**Total Number of Spectra:** 1

**Number of Replicates (out of 8):** 1

**Best Match Score:** 126.8

**Best Match Posterior Error Probability:** 4.61E-05

**Best Match Spectrum:**

**Scan number** 12941      **Raw file** A549-US-WT-top20CID-Elite-2ug-B12  
**Method** ITMS; CID      **Genenames** FGD6

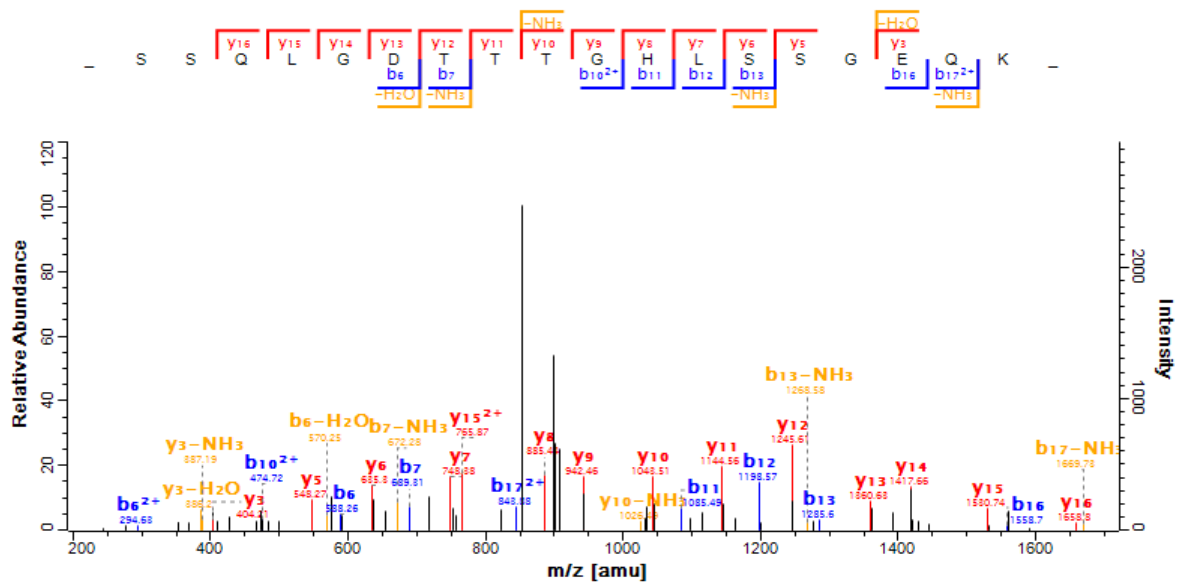

**Protein Group ID:** 1174

**Protein Accession Numbers:** F8VYC4; P0DJJ1; J3QTV4; P0DJJ0; E7ES93

**Gene Names:** RGPD1;RGPD2

**Peptide Sequence:** SNDSETSSVAQSGSESK

**Total Number of Spectra:** 3

**Number of Replicates (out of 8):** 3

**Best Match Score:** 79.393

**Best Match Posterior Error Probability:** 0.0016748

**Best Match Spectrum:**

**Scan number** 2982      **Raw file** A549-US-Mock-top20CID-Elite-2ug-B11  
**Method** ITMS; CID      **Genenames** RGPD1;RGPD2

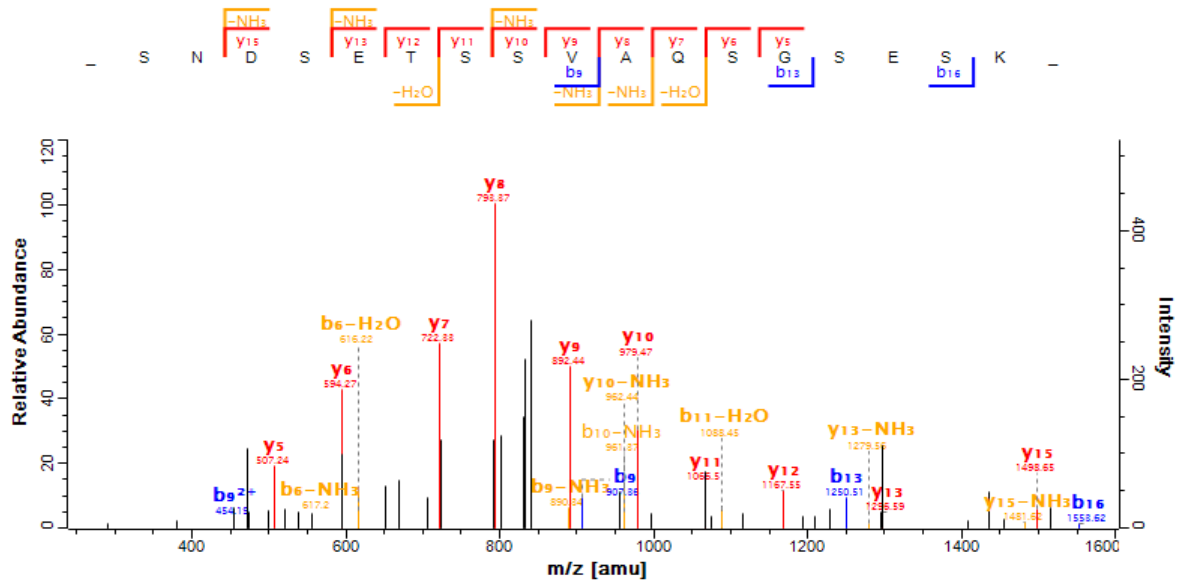

**Protein Group ID:** 1181

**Protein Accession Numbers:** Q8WYA0; H0YHE2; Q8WYA0-3; F8W1J4

**Gene Names:** IFT81

**Peptide Sequence:** MLSLLGILK

**Total Number of Spectra:** 5

**Number of Replicates (out of 8):** 5

**Best Match Score:** 120.15

**Best Match Posterior Error Probability:** 0.00041533

**Best Match Spectrum:**

|                    |           |                  |                                     |
|--------------------|-----------|------------------|-------------------------------------|
| <b>Scan number</b> | 78060     | <b>Raw file</b>  | A549-US-Mock-top20CID-Elite-2ug-B12 |
| <b>Method</b>      | ITMS; CID | <b>Genenames</b> | IFT81                               |

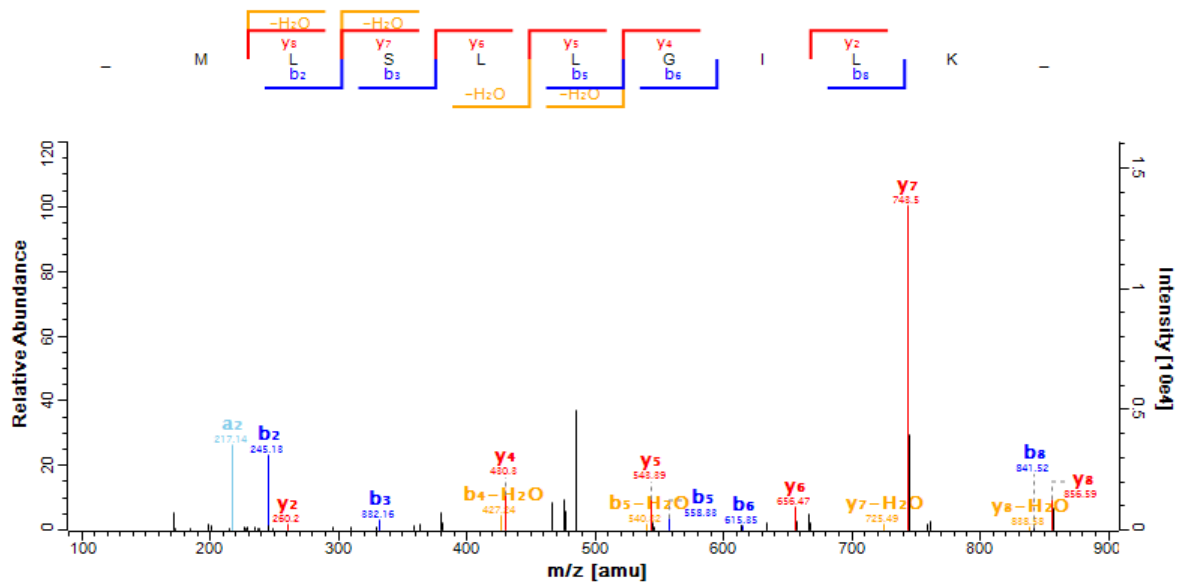

**Protein Group ID:** 1183

**Protein Accession Numbers:** Q9UHY8-2; Q9UHY8; G3V0F5; F8W6C0; F8WB37

**Gene Names:** FEZ2

**Peptide Sequence:** TLHLLTLNLSEK

**Total Number of Spectra:** 1

**Number of Replicates (out of 8):** 1

**Best Match Score:** 109.72

**Best Match Posterior Error Probability:** 0.00027452

**Best Match Spectrum:**

**Scan number** 55571      **Raw file** A549-US-Mock-top20CID-Elite-2ug-B12  
**Method** ITMS; CID      **Genenames** FEZ2

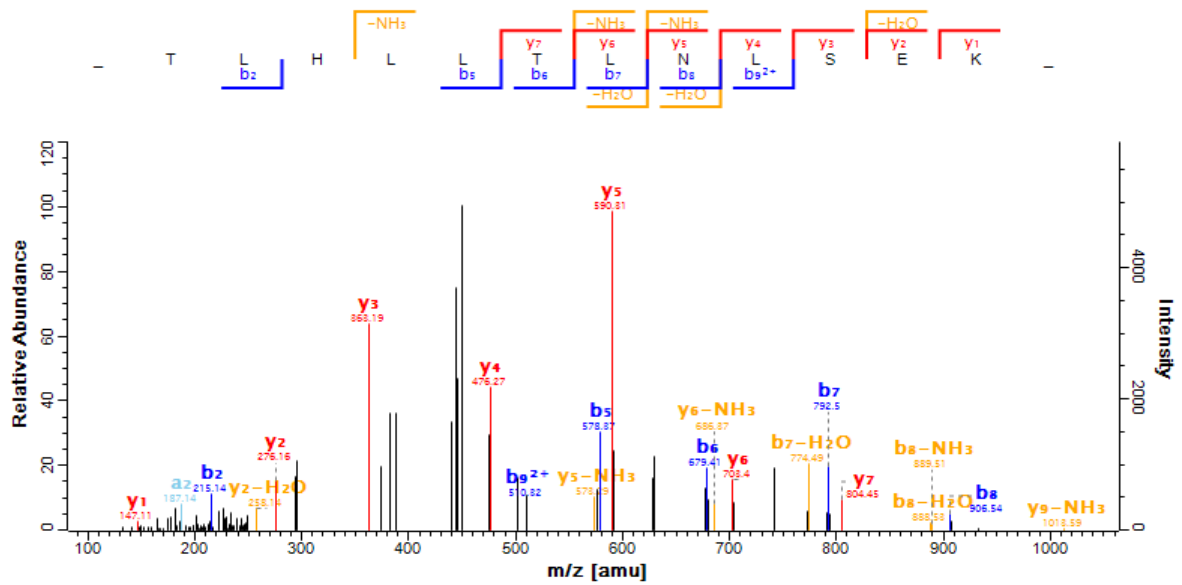

**Protein Group ID:** 1184

**Protein Accession Numbers:** Q9H2D6; Q9H2D6-2; Q9H2D6-3; F8W6V6; Q9H2D6-5

**Gene Names:** TRIOBP

**Peptide Sequence:** ELQVLSEQYSQK

**Total Number of Spectra:** 5

**Number of Replicates (out of 8):** 5

**Best Match Score:** 273.27

**Best Match Posterior Error Probability:** 9.76E-104

**Best Match Spectrum:**

**Scan number** 35203      **Raw file** A549-US-WT-top20CID-Elite-2ug-B12  
**Method** ITMS; CID      **Genenames** TRIOBP

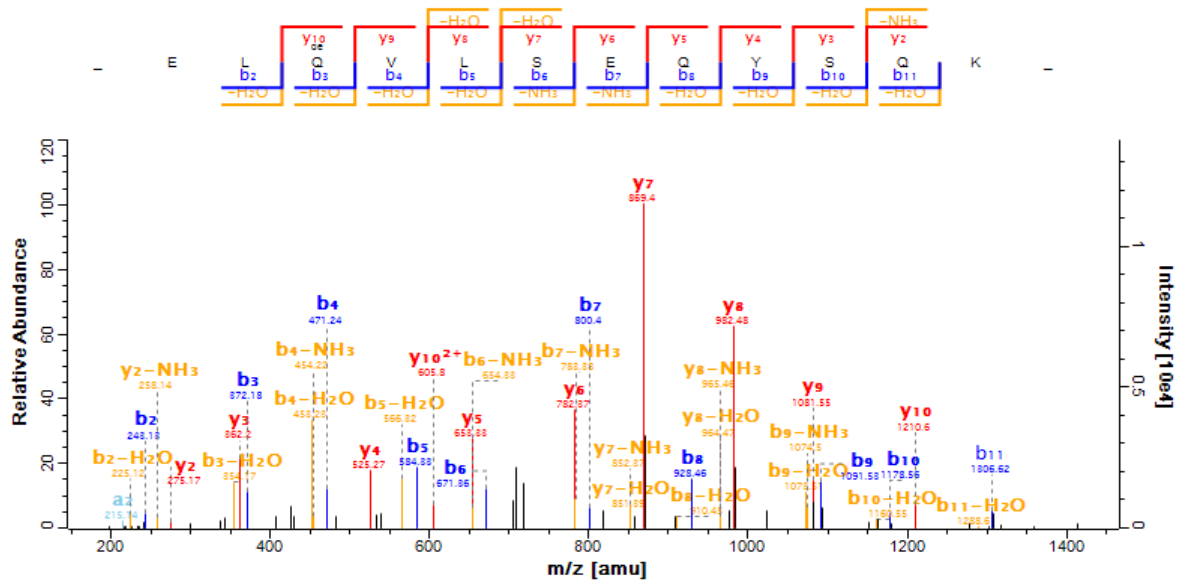

**Protein Group ID:** 1187

**Protein Accession Numbers:** O75935; O75935-2; Q8NB28; F8W786; O75935-3

**Gene Names:** DCTN3

**Peptide Sequence:** YLDPEYIDR

**Total Number of Spectra:** 2

**Number of Replicates (out of 8):** 2

**Best Match Score:** 87.913

**Best Match Posterior Error Probability:** 0.0040334

**Best Match Spectrum:**

|                    |           |                  |                                     |
|--------------------|-----------|------------------|-------------------------------------|
| <b>Scan number</b> | 33127     | <b>Raw file</b>  | A549-US-Mock-top20CID-Elite-2ug-B12 |
| <b>Method</b>      | ITMS; CID | <b>Genenames</b> | DCTN3                               |

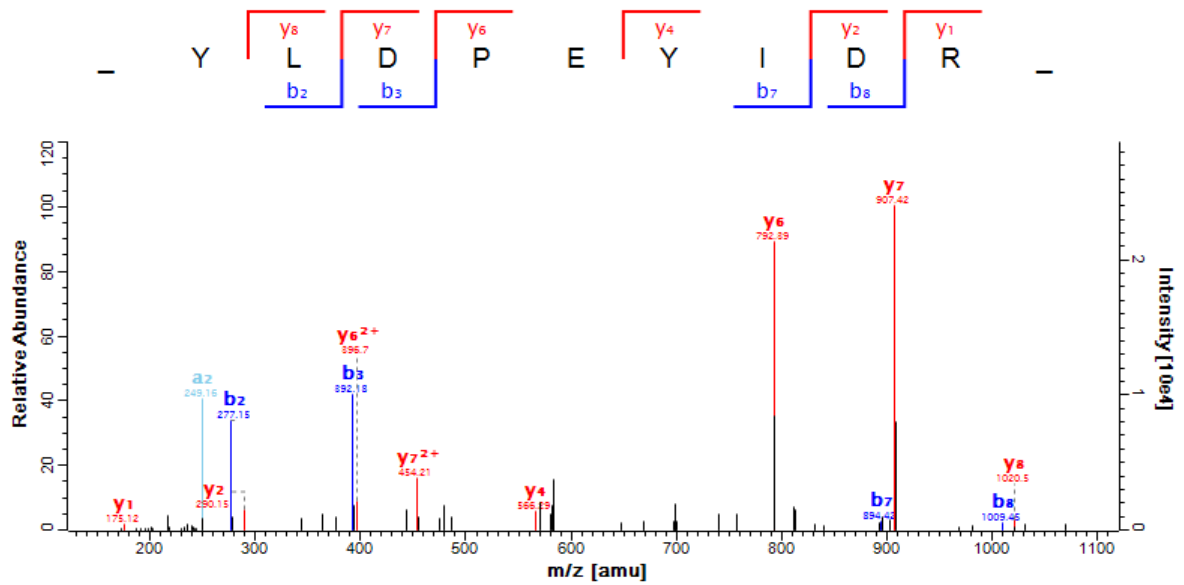

**Protein Group ID:** 1189

**Protein Accession Numbers:** Q6P2H3; Q6P2H3-2; F8W7K4; H7BZW2; Q6P2H3-3

**Gene Names:** CEP85

**Peptide Sequence:** ELSVQNQDLIEK

**Total Number of Spectra:** 1

**Number of Replicates (out of 8):** 1

**Best Match Score:** 78.903

**Best Match Posterior Error Probability:** 0.0036177

**Best Match Spectrum:**

|                    |           |                  |                                     |
|--------------------|-----------|------------------|-------------------------------------|
| <b>Scan number</b> | 31930     | <b>Raw file</b>  | A549-US-Mock-top20CID-Elite-2ug-B11 |
| <b>Method</b>      | ITMS; CID | <b>Genenames</b> | CEP85                               |

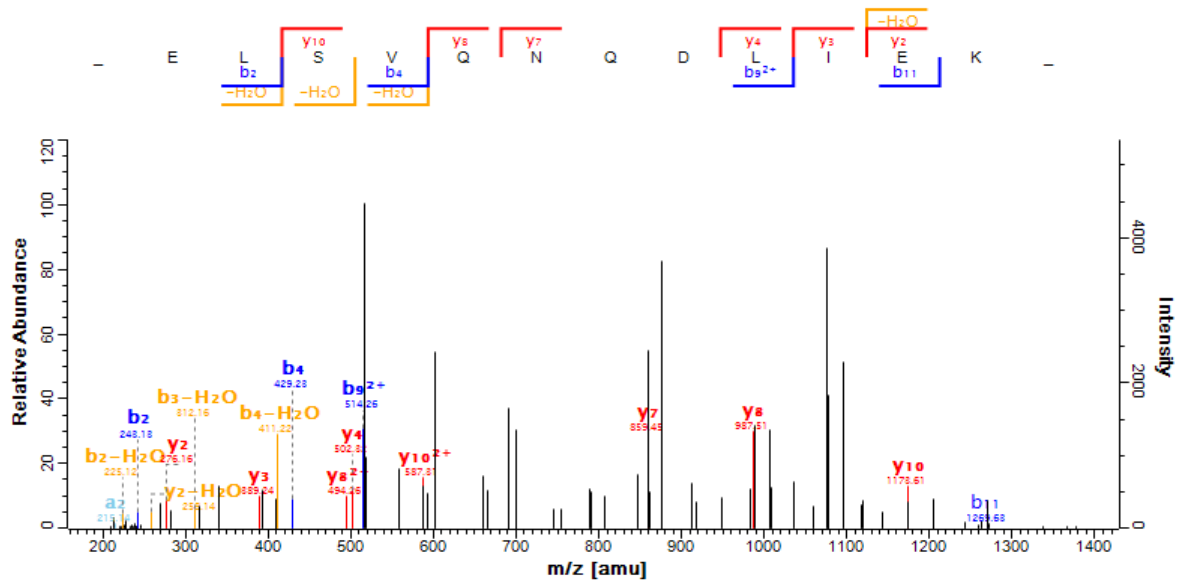



**Protein Group ID:** 1192  
**Protein Accession Numbers:** P56134; F8W7V3  
**Gene Names:** ATP5J2  
**Peptide Sequence:** ASVGEC PAPVPVK  
**Total Number of Spectra:** 4  
**Number of Replicates (out of 8):** 4  
**Best Match Score:** 105.17  
**Best Match Posterior Error Probability:** 0.00058762  
**Best Match Spectrum:**

**Scan number** 31941      **Raw file** A549-US-WT-top20CID-Elite-2ug-B14  
**Method** ITMS; CID      **Genenames** ATP5J2

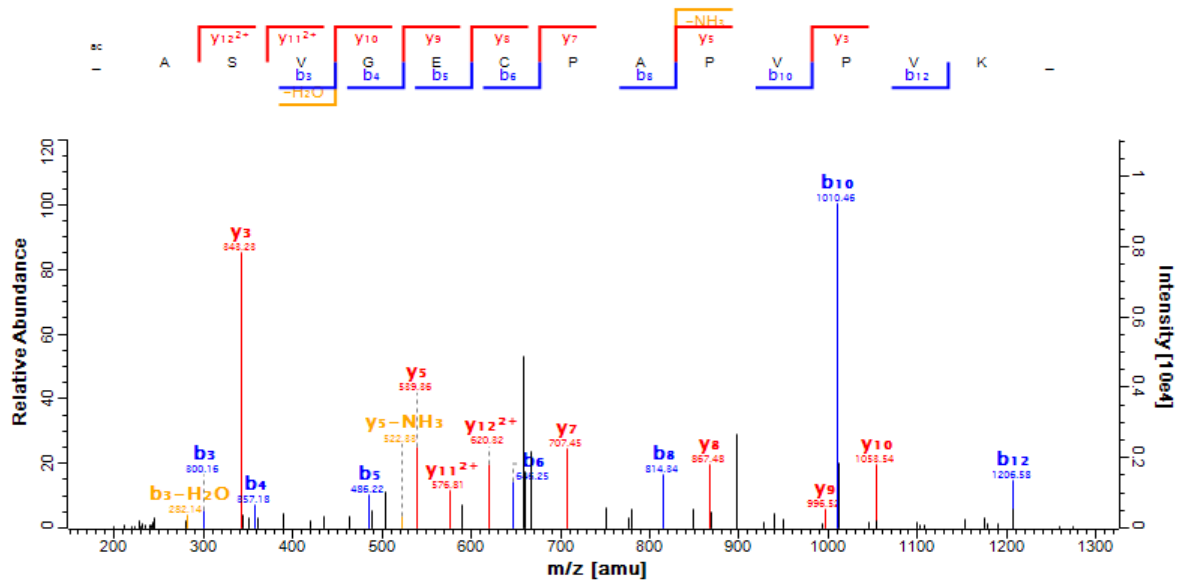

**Protein Group ID:** 1197

**Protein Accession Numbers:** O15381; O15381-5; O15381-2; H0Y8B6; O15381-3; F8W938

**Gene Names:** NVL

**Peptide Sequence:** TLLAHAIAGELDLPIK

**Total Number of Spectra:** 3

**Number of Replicates (out of 8):** 3

**Best Match Score:** 88.768

**Best Match Posterior Error Probability:** 0.00046545

**Best Match Spectrum:**

|                    |           |                  |                                     |
|--------------------|-----------|------------------|-------------------------------------|
| <b>Scan number</b> | 79596     | <b>Raw file</b>  | A549-US-Mock-top20CID-Elite-2ug-B12 |
| <b>Method</b>      | ITMS; CID | <b>Genenames</b> | NVL                                 |

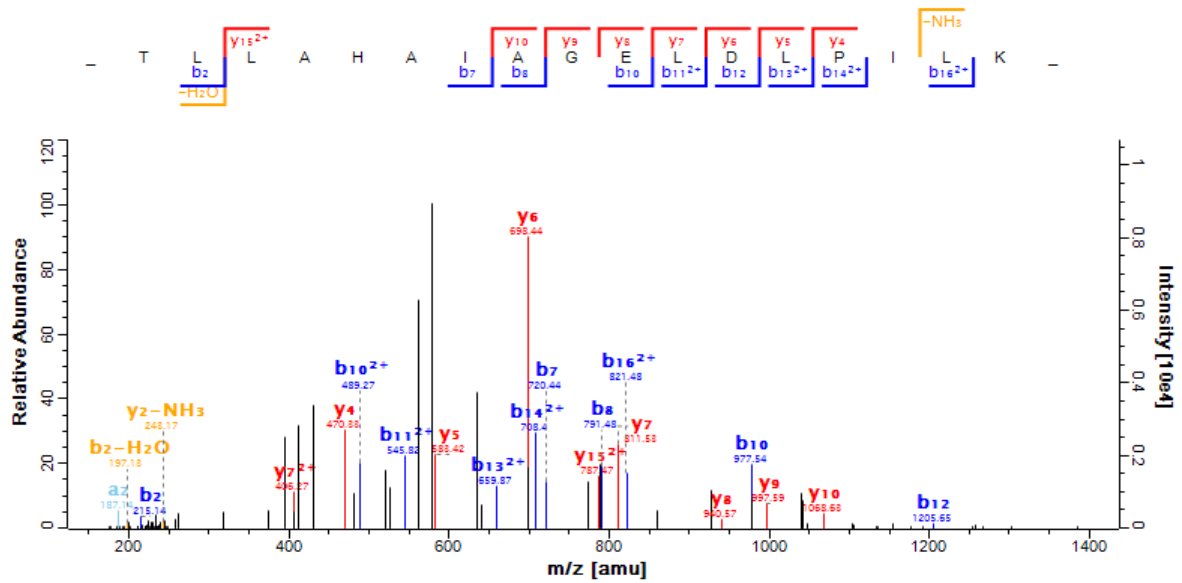

**Protein Group ID:** 1201

**Protein Accession Numbers:** F8W9H1; J3KPJ3; Q8N5S9-2; Q8N5S9

**Gene Names:** CAMKK1

**Peptide Sequence:** LAYNESEDR

**Total Number of Spectra:** 3

**Number of Replicates (out of 8):** 3

**Best Match Score:** 105.98

**Best Match Posterior Error Probability:** 0.001302

**Best Match Spectrum:**

**Scan number** 7673      **Raw file** A549-US-Mock-top20CID-Elite-2ug-B12  
**Method** ITMS; CID      **Genenames** CAMKK1

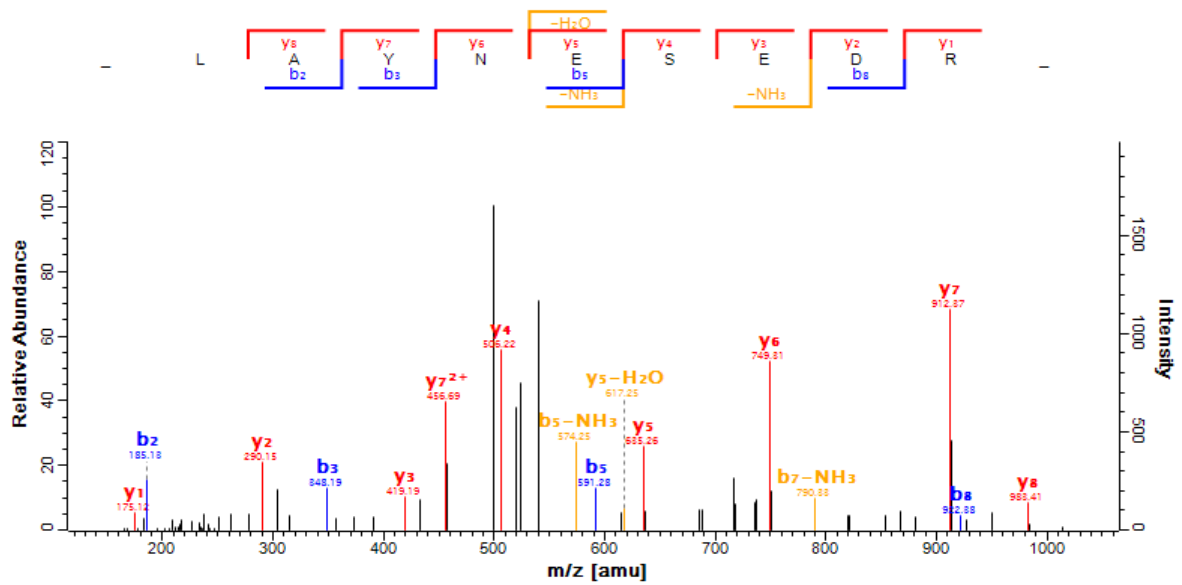

**Protein Group ID:** 1209  
**Protein Accession Numbers:** Q9UK59; F8WAY1  
**Gene Names:** DBR1  
**Peptide Sequence:** IYETLALAEER  
**Total Number of Spectra:** 3  
**Number of Replicates (out of 8):** 3  
**Best Match Score:** 116.55  
**Best Match Posterior Error Probability:** 0.0001962  
**Best Match Spectrum:**

|                    |           |                  |                                     |
|--------------------|-----------|------------------|-------------------------------------|
| <b>Scan number</b> | 37594     | <b>Raw file</b>  | A549-US-Mock-top20CID-Elite-2ug-B11 |
| <b>Method</b>      | ITMS; CID | <b>Genenames</b> | DBR1                                |

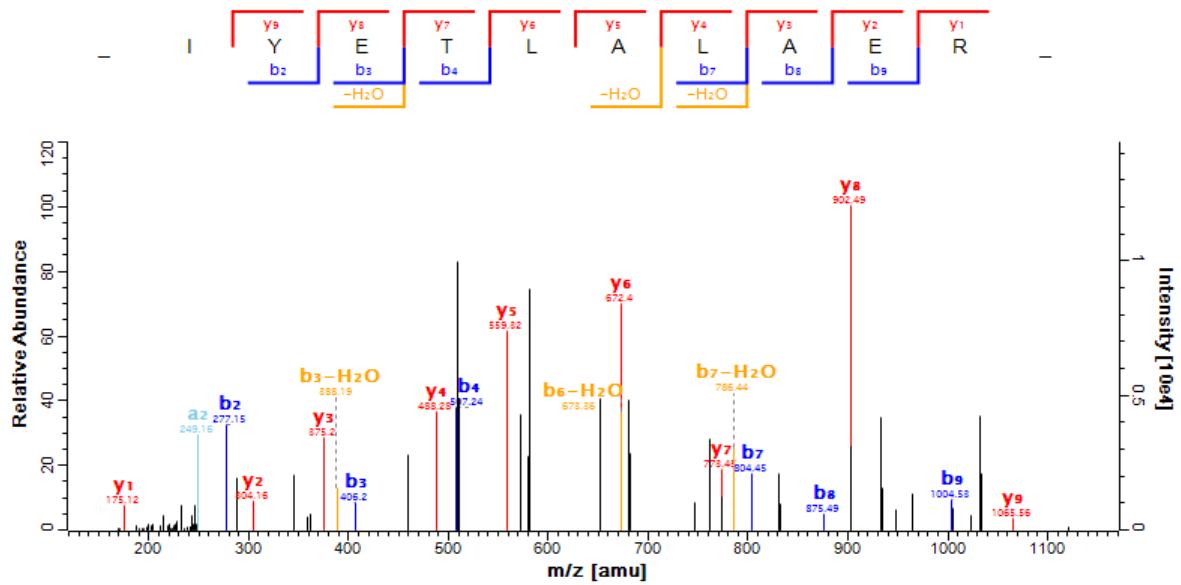

**Protein Group ID:** 1212  
**Protein Accession Numbers:** Q9NQ50; F8WBK5  
**Gene Names:** MRPL40  
**Peptide Sequence:** ATQELIPIEDFITPLK  
**Total Number of Spectra:** 8  
**Number of Replicates (out of 8):** 8  
**Best Match Score:** 145.86  
**Best Match Posterior Error Probability:** 2.04E-06  
**Best Match Spectrum:**

**Scan number** 84064      **Raw file** A549-US-Mock-top20CID-Elite-2ug-B11  
**Method** ITMS; CID      **Genenames** MRPL40

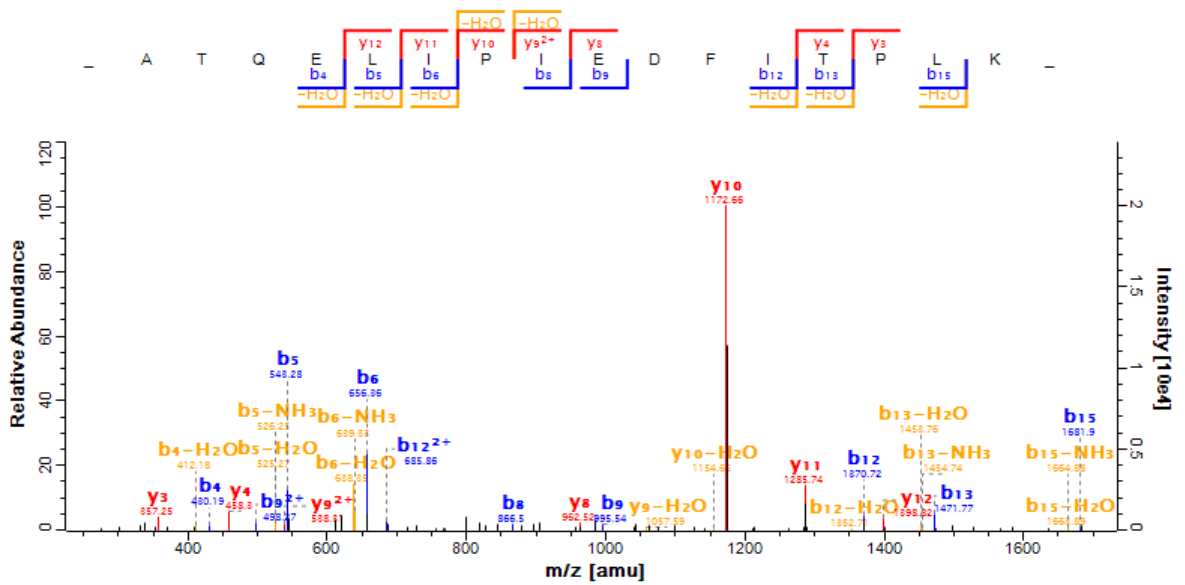

**Protein Group ID:** 1213

**Protein Accession Numbers:** Q6P6B7; F8WEI4; F8WBM1

**Gene Names:** ANKRD16

**Peptide Sequence:** NLGVIQELVEHGANPLLK

**Total Number of Spectra:** 4

**Number of Replicates (out of 8):** 4

**Best Match Score:** 79.652

**Best Match Posterior Error Probability:** 0.001278

**Best Match Spectrum:**

|                    |           |                  |                                     |
|--------------------|-----------|------------------|-------------------------------------|
| <b>Scan number</b> | 78454     | <b>Raw file</b>  | A549-US-Mock-top20CID-Elite-2ug-B12 |
| <b>Method</b>      | ITMS; CID | <b>Genenames</b> | ANKRD16                             |

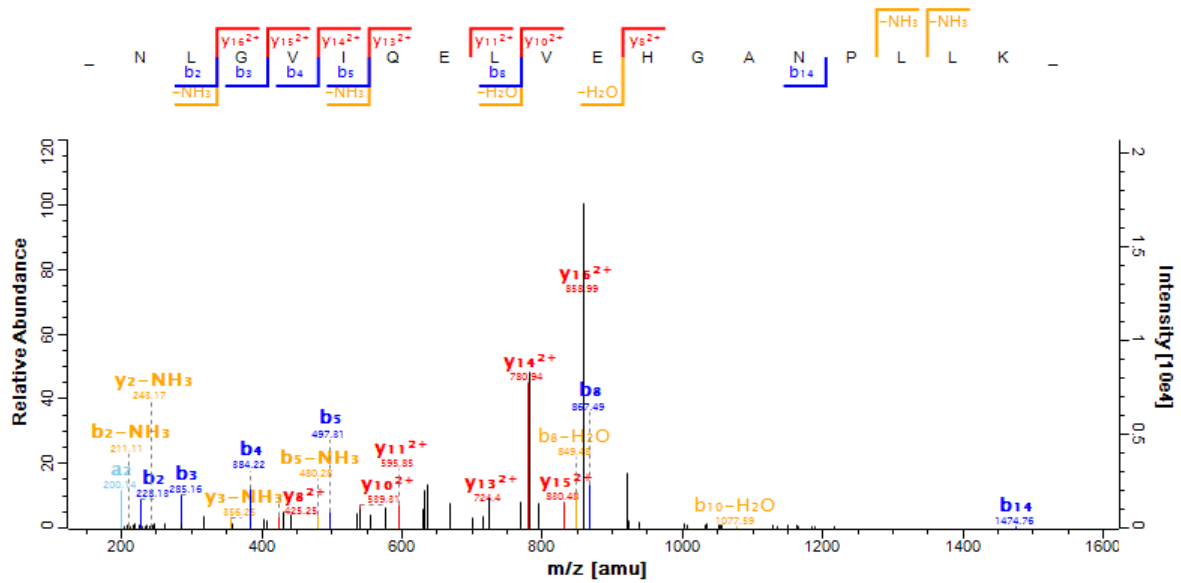

**Protein Group ID:** 1218

**Protein Accession Numbers:** Q8N1G0; Q8N1G0-2; F8WCX2; H0Y5I5

**Gene Names:** ZNF687

**Peptide Sequence:** TATGPSTGGGTVISR

**Total Number of Spectra:** 2

**Number of Replicates (out of 8):** 2

**Best Match Score:** 79.771

**Best Match Posterior Error Probability:** 0.0026466

**Best Match Spectrum:**

|                    |           |                  |                                   |
|--------------------|-----------|------------------|-----------------------------------|
| <b>Scan number</b> | 12963     | <b>Raw file</b>  | A549-US-WT-top20CID-Elite-2ug-B11 |
| <b>Method</b>      | ITMS; CID | <b>Genenames</b> | ZNF687                            |

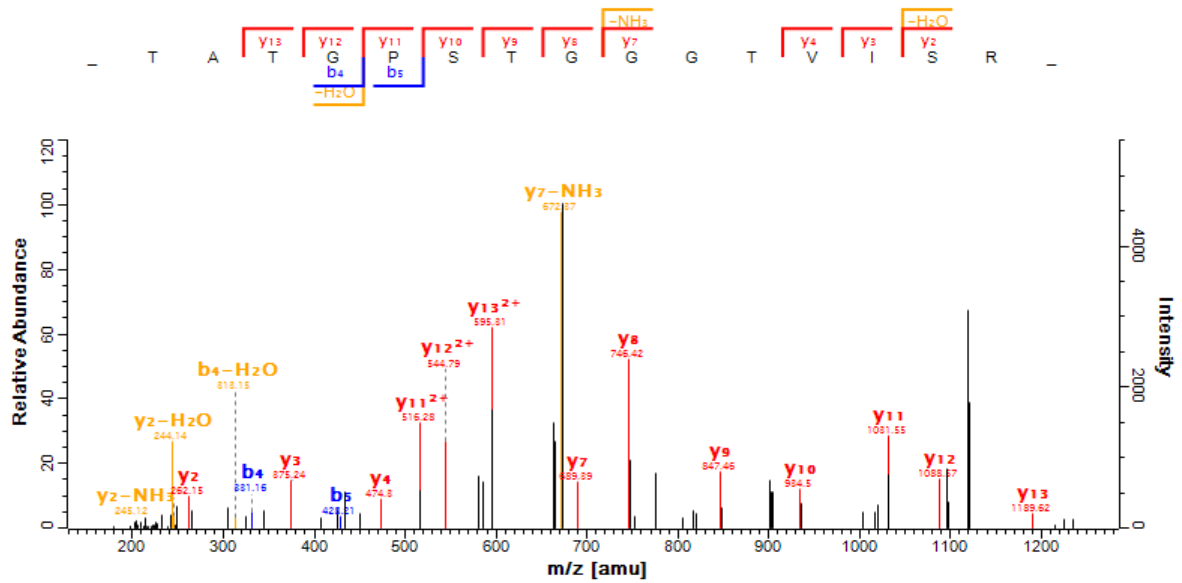

**Protein Group ID:** 1220  
**Protein Accession Numbers:** P09871; F8WCZ6  
**Gene Names:** C1S  
**Peptide Sequence:** GDSGGAFVQDPNDK  
**Total Number of Spectra:** 5  
**Number of Replicates (out of 8):** 4  
**Best Match Score:** 142.91  
**Best Match Posterior Error Probability:** 7.04E-06  
**Best Match Spectrum:**

**Scan number** 19117      **Raw file** A549-US-WT-top20CID-Elite-2ug-B13  
**Method** ITMS; CID      **Genenames** C1S

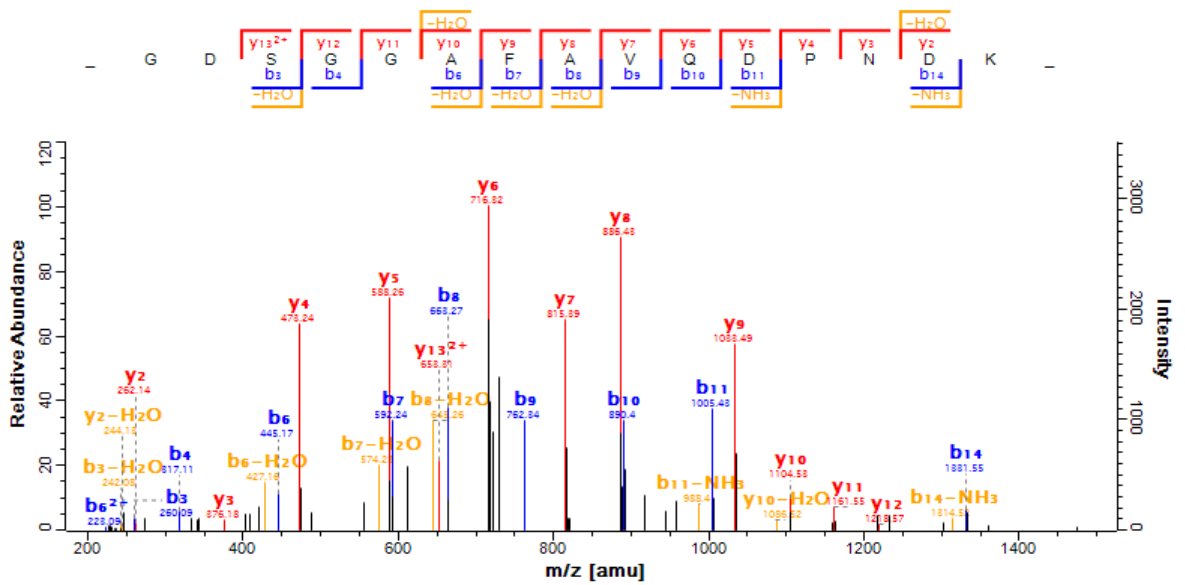



**Protein Group ID:** 1223

**Protein Accession Numbers:** Q92685; H7C0X4; F8WE30; H7BZZ2; F8WF93

**Gene Names:** ALG3

**Peptide Sequence:** SGSAAQAEG LCK

**Total Number of Spectra:** 9

**Number of Replicates (out of 8):** 7

**Best Match Score:** 191.79

**Best Match Posterior Error Probability:** 3.03E-18

**Best Match Spectrum:**

**Scan number** 6899      **Raw file** A549-US-WT-top20CID-Elite-2ug-B14  
**Method** ITMS; CID      **Genenames** ALG3

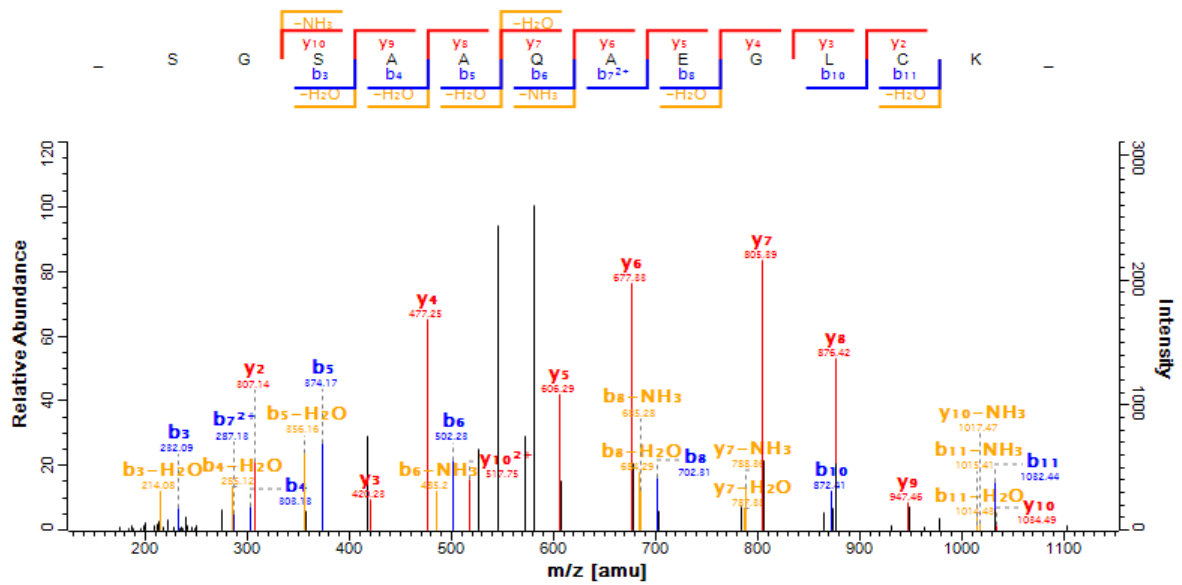

**Protein Group ID:** 1224

**Protein Accession Numbers:** F8WEA9; Q8IVT5; Q8IVT5-3; J3QQL4

**Gene Names:** KSR1

**Peptide Sequence:** FGLGVLESSNPK

**Total Number of Spectra:** 1

**Number of Replicates (out of 8):** 1

**Best Match Score:** 89.43

**Best Match Posterior Error Probability:** 0.0014893

**Best Match Spectrum:**

**Scan number** 46105      **Raw file** A549-US-Mock-top20CID-Elite-2ug-B12  
**Method** ITMS; CID      **Genenames** KSR1

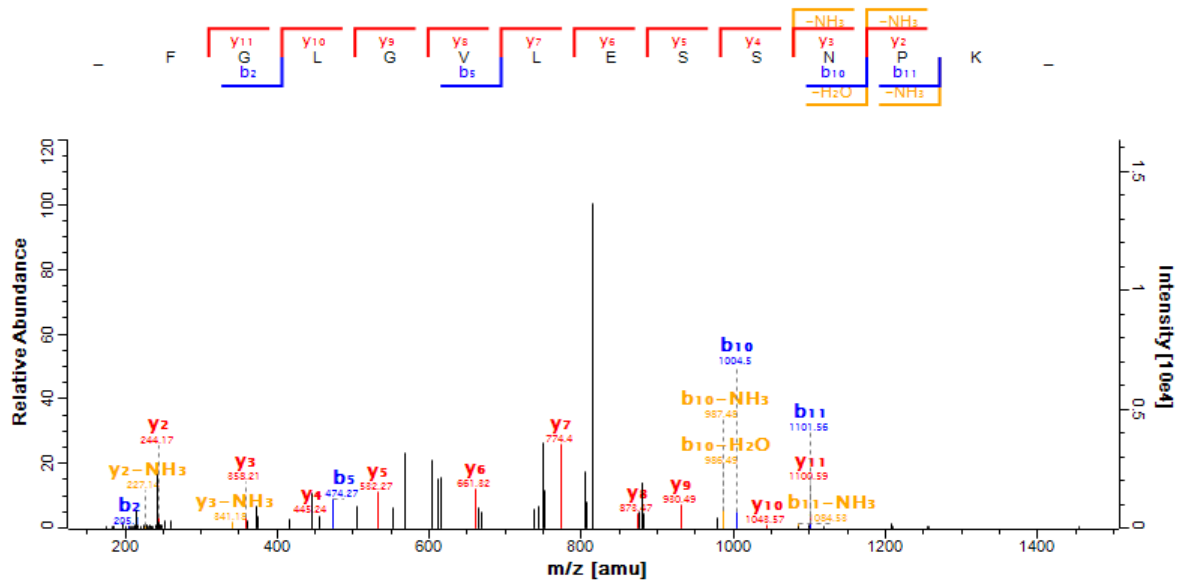

**Protein Group ID:** 1225

**Protein Accession Numbers:** Q9UBF6; Q9UBF6-2; Q9UBF6-4; Q9UBF6-3; F8WEU8

**Gene Names:** RNF7

**Peptide Sequence:** ADVEDGEETCALASHSGSSGSK

**Total Number of Spectra:** 2

**Number of Replicates (out of 8):** 2

**Best Match Score:** 158.44

**Best Match Posterior Error Probability:** 2.46E-30

**Best Match Spectrum:**

**Scan number** 27217      **Raw file** A549-US-Mock-top20CID-Elite-2ug-B13  
**Method** ITMS; CID      **Genenames** RNF7

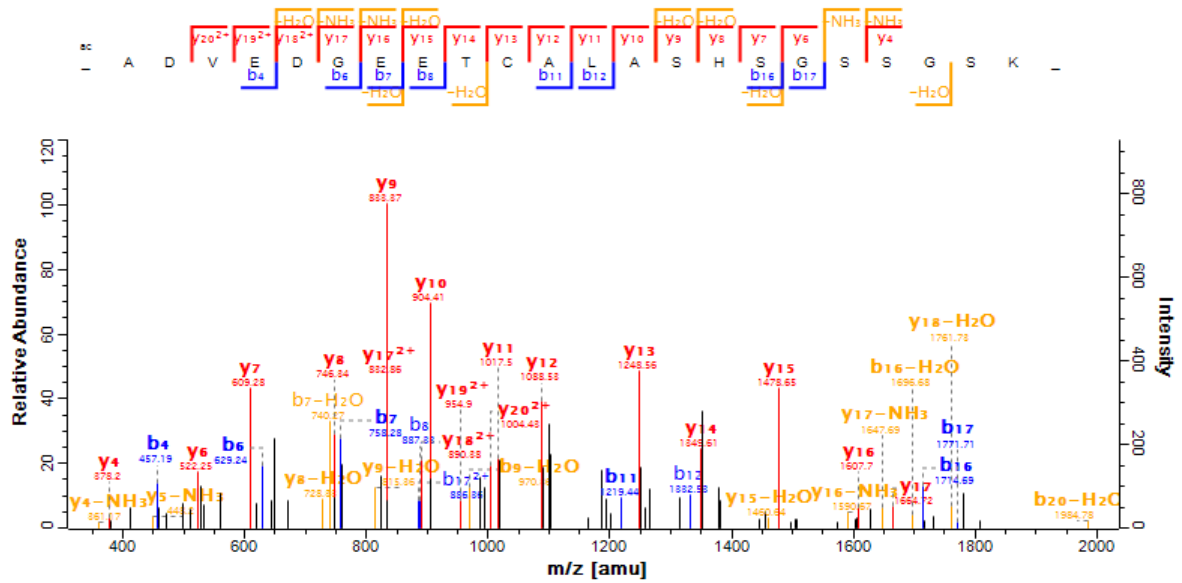

**Protein Group ID:** 1228

**Protein Accession Numbers:** P0DI81-3; G1K394; P0DI81; P0DI82

**Gene Names:** TRAPPC2;TRAPPC2P1

**Peptide Sequence:** FSMNPFYEPNSPIR

**Total Number of Spectra:** 1

**Number of Replicates (out of 8):** 1

**Best Match Score:** 95.981

**Best Match Posterior Error Probability:** 0.00062797

**Best Match Spectrum:**

**Scan number** 59801      **Raw file** A549-US-Mock-top20CID-Elite-2ug-B11  
**Method** ITMS; CID      **Genenames** TRAPPC2;TRAPPC2P1

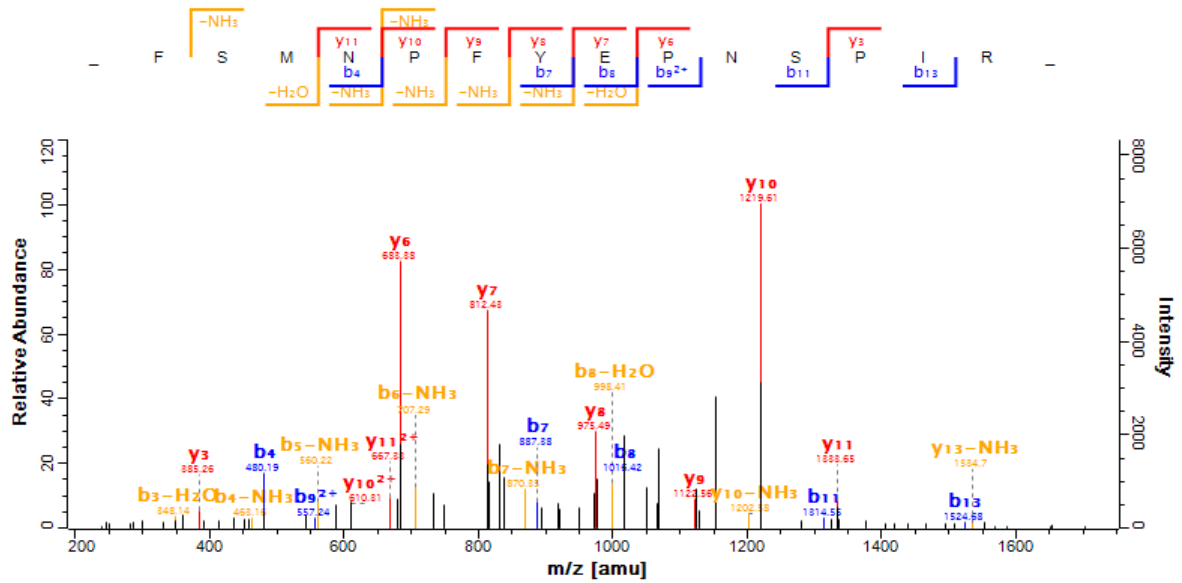

**Protein Group ID:** 1230  
**Protein Accession Numbers:** Q8IV38; G3V0G5  
**Gene Names:** ANKMY2  
**Peptide Sequence:** IVMLVNENPLLTEEAALNK  
**Total Number of Spectra:** 1  
**Number of Replicates (out of 8):** 1  
**Best Match Score:** 69.805  
**Best Match Posterior Error Probability:** 0.0027986  
**Best Match Spectrum:**

**Scan number** 74174      **Raw file** A549-US-WT-top20CID-Elite-2ug-B13  
**Method** ITMS; CID      **Genenames** ANKMY2

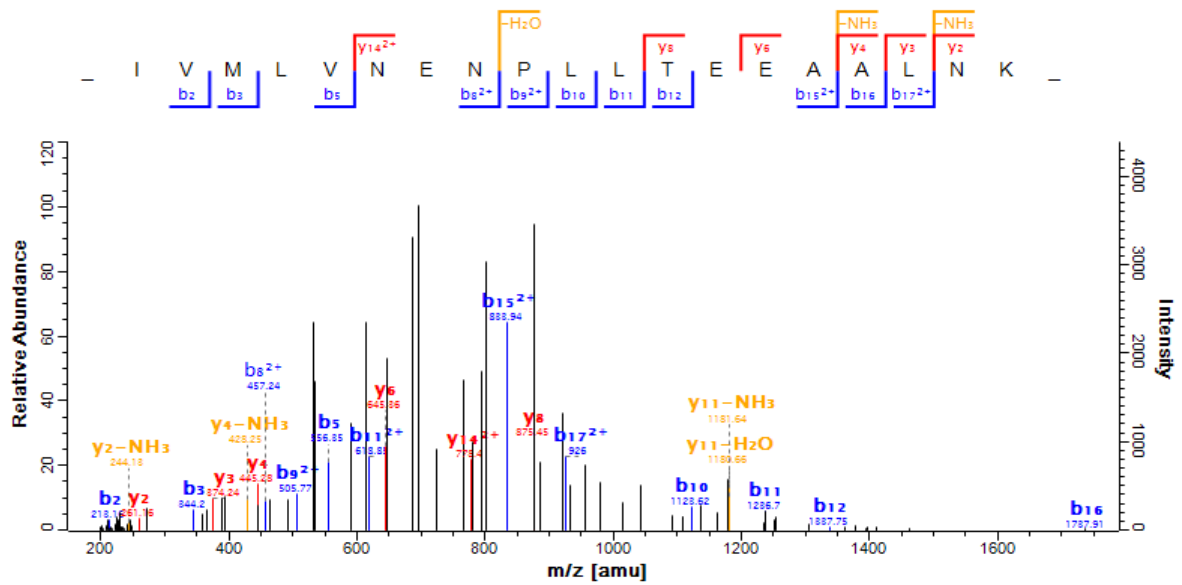

**Protein Group ID:** 1236  
**Protein Accession Numbers:** G3V1B1  
**Gene Names:** SUGT1P3  
**Peptide Sequence:** FFQSFSDALIDQPQAAL EELTK  
**Total Number of Spectra:** 15  
**Number of Replicates (out of 8):** 8  
**Best Match Score:** 193.42  
**Best Match Posterior Error Probability:** 6.00E-40  
**Best Match Spectrum:**

**Scan number** 89139      **Raw file** A549-US-Mock-top20CID-Elite-2ug-B14  
**Method** ITMS; CID      **Genenames** SUGT1P3

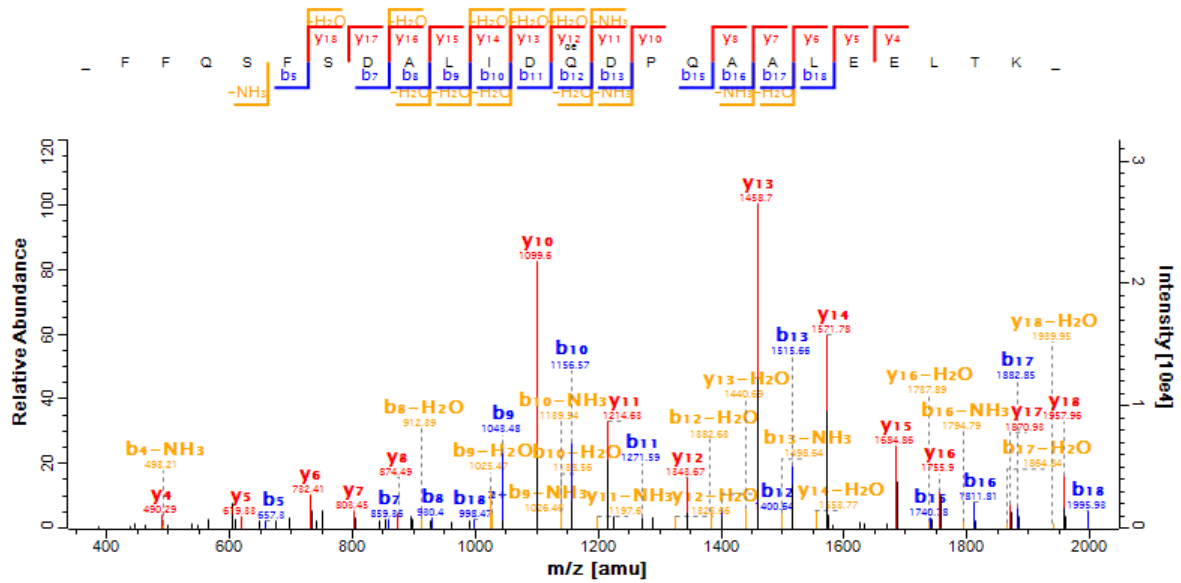

**Protein Group ID:** 1240  
**Protein Accession Numbers:** Q969J3; G3V1P3  
**Gene Names:** LOH12CR1  
**Peptide Sequence:** GLLSGQTSPTNAK  
**Total Number of Spectra:** 4  
**Number of Replicates (out of 8):** 4  
**Best Match Score:** 117.7  
**Best Match Posterior Error Probability:** 0.00018435  
**Best Match Spectrum:**

**Scan number** 18439      **Raw file** A549-US-WT-top20CID-Elite-2ug-B11  
**Method** ITMS; CID      **Genenames** LOH12CR1

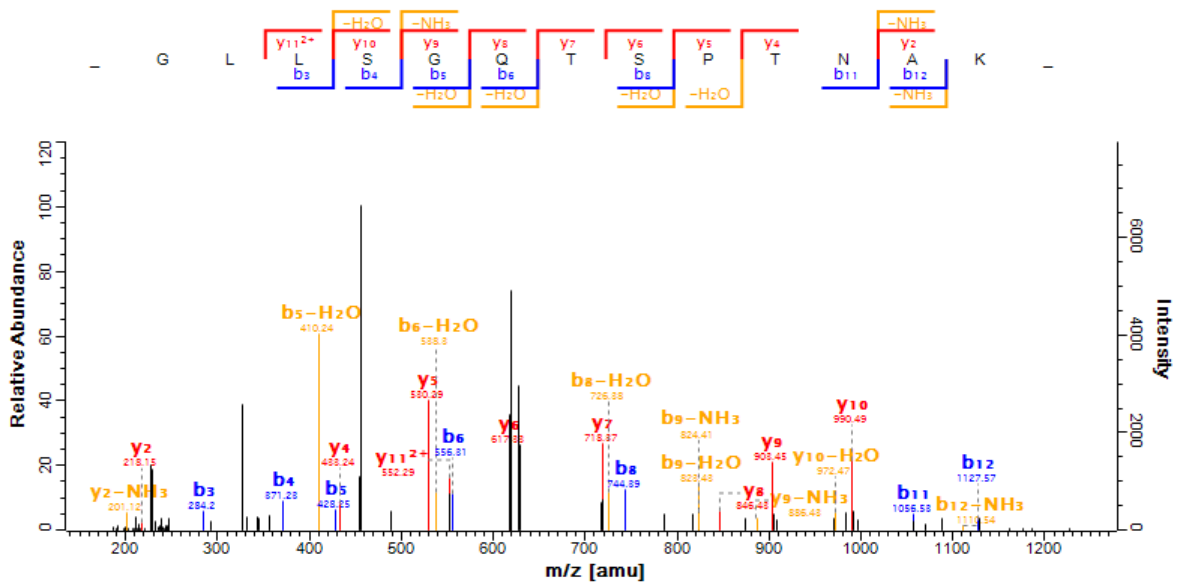

**Protein Group ID:** 1243

**Protein Accession Numbers:** G3V1X3; Q8WUH1; G3V214; Q8WUH1-2; H0YIM9

**Gene Names:** CHURC1;CHURC1-FNTB

**Peptide Sequence:** AEDTISILPDDR

**Total Number of Spectra:** 8

**Number of Replicates (out of 8):** 6

**Best Match Score:** 136.7

**Best Match Posterior Error Probability:** 3.33E-05

**Best Match Spectrum:**

**Scan number** 44247      **Raw file** A549-US-Mock-top20CID-Elite-2ug-B14  
**Method** ITMS; CID      **Genenames** CHURC1;CHURC1-FNTB

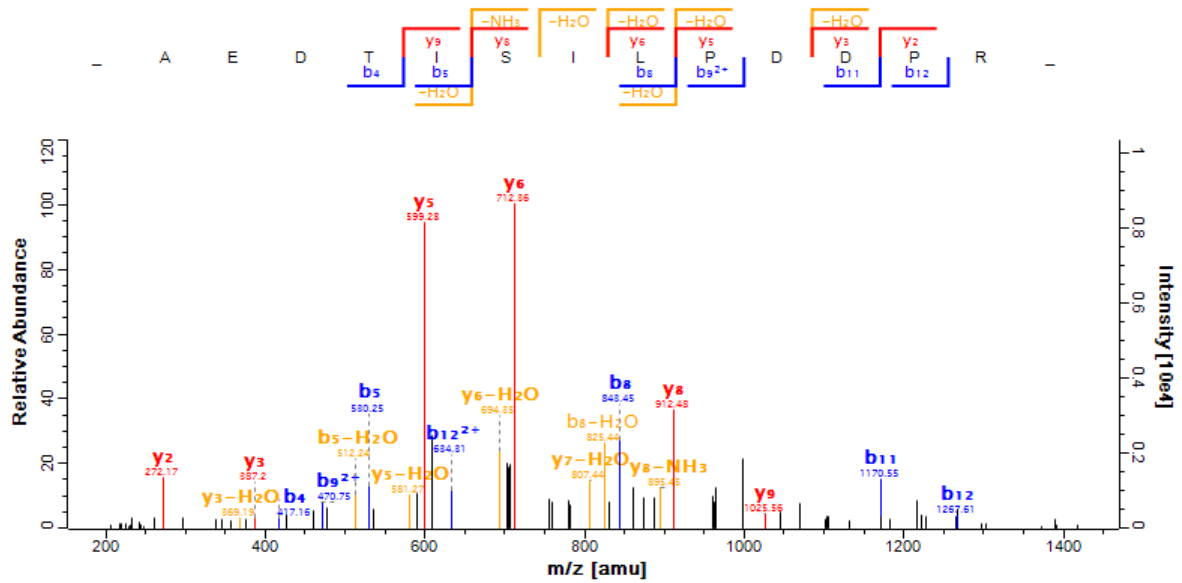



**Protein Group ID:** 1248

**Protein Accession Numbers:** Q86SZ2; Q86SZ2-2; G3V2H7; G3V4C3

**Gene Names:** TRAPPC6B

**Peptide Sequence:** ADEALFLLHNEMVSGVYK

**Total Number of Spectra:** 6

**Number of Replicates (out of 8):** 6

**Best Match Score:** 149.99

**Best Match Posterior Error Probability:** 1.67E-07

**Best Match Spectrum:**

**Scan number** 91749      **Raw file** A549-US-Mock-top20CID-Elite-2ug-B12  
**Method** ITMS; CID      **Genenames** TRAPPC6B

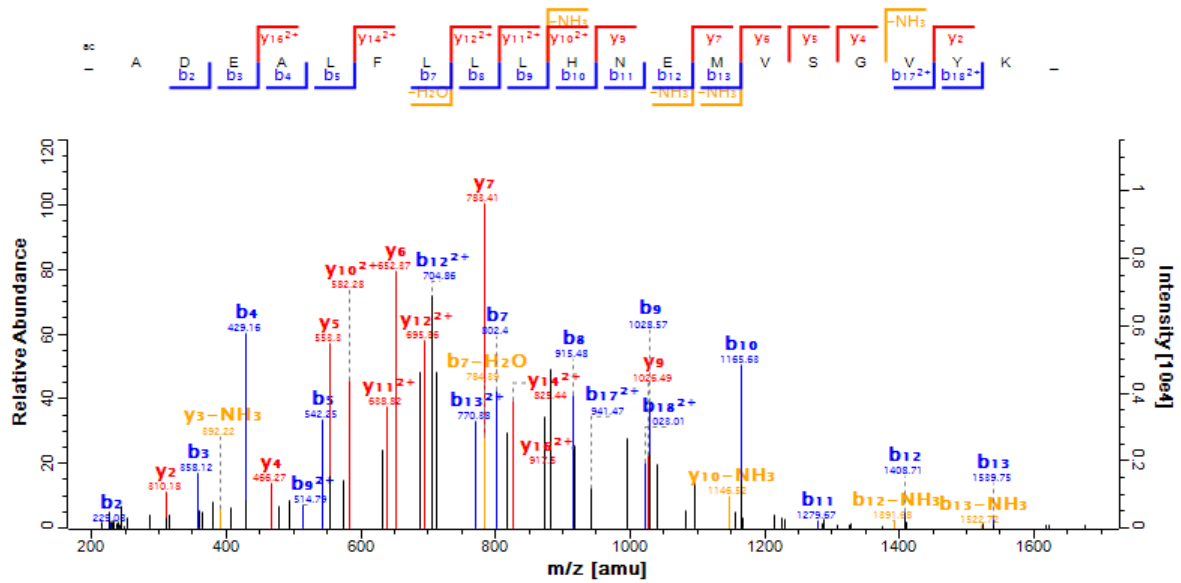

**Protein Group ID:** 1250

**Protein Accession Numbers:** Q9H7H0-3; Q9H7H0; Q9H7H0-2; G3V2Q4; G3V4H5; G3V353; H0YJW8; G3V3X6; G3V4P2

**Gene Names:** METTL17

**Peptide Sequence:** FLENPDLSQTEEK

**Total Number of Spectra:** 4

**Number of Replicates (out of 8):** 4

**Best Match Score:** 124.51

**Best Match Posterior Error Probability:** 9.33E-05

**Best Match Spectrum:**

|                    |           |                  |                                     |
|--------------------|-----------|------------------|-------------------------------------|
| <b>Scan number</b> | 31044     | <b>Raw file</b>  | A549-US-Mock-top20CID-Elite-2ug-B14 |
| <b>Method</b>      | ITMS; CID | <b>Genenames</b> | METTL17                             |

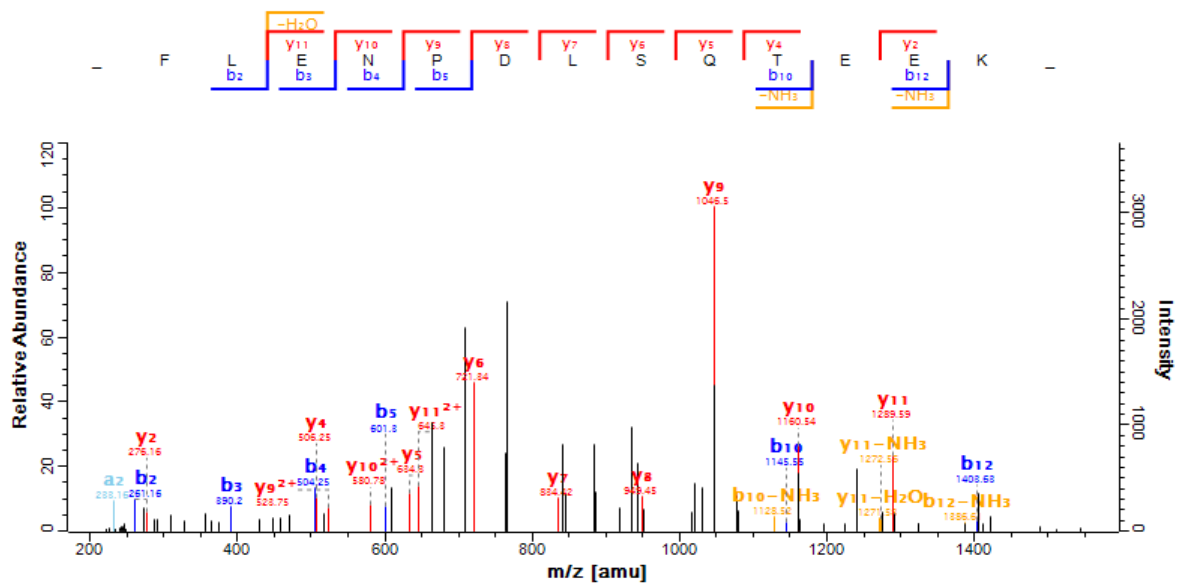

**Protein Group ID:** 1257  
**Protein Accession Numbers:** G3V3G9; Q5TAQ9  
**Gene Names:** DCAF8  
**Peptide Sequence:** IWAPTAEASTELTGLK  
**Total Number of Spectra:** 4  
**Number of Replicates (out of 8):** 4  
**Best Match Score:** 88.561  
**Best Match Posterior Error Probability:** 0.0006397  
**Best Match Spectrum:**

**Scan number** 56994      **Raw file** A549-US-WT-top20CID-Elite-2ug-B14  
**Method** ITMS; CID      **Genenames** DCAF8

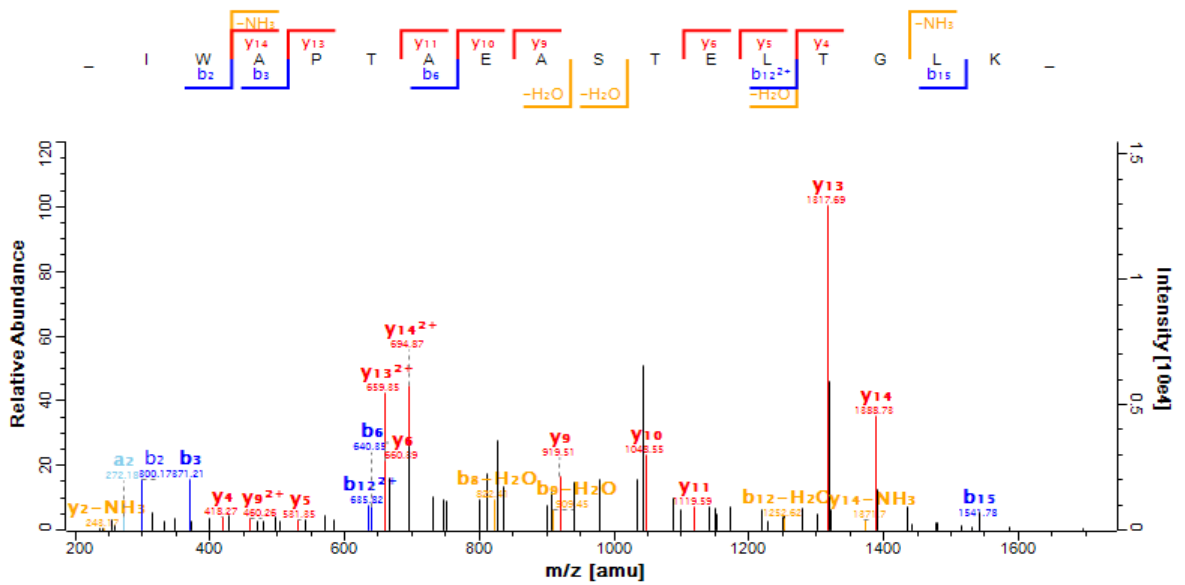

**Protein Group ID:** 1263

**Protein Accession Numbers:** P61244; P61244-2; G3V5L1; G3V570

**Gene Names:** MAX

**Peptide Sequence:** RQNALLEQQVR

**Total Number of Spectra:** 3

**Number of Replicates (out of 8):** 3

**Best Match Score:** 91.961

**Best Match Posterior Error Probability:** 0.0029766

**Best Match Spectrum:**

**Scan number** 16931      **Raw file** A549-US-WT-top20CID-Elite-2ug-B12  
**Method** ITMS; CID      **Genenames** MAX

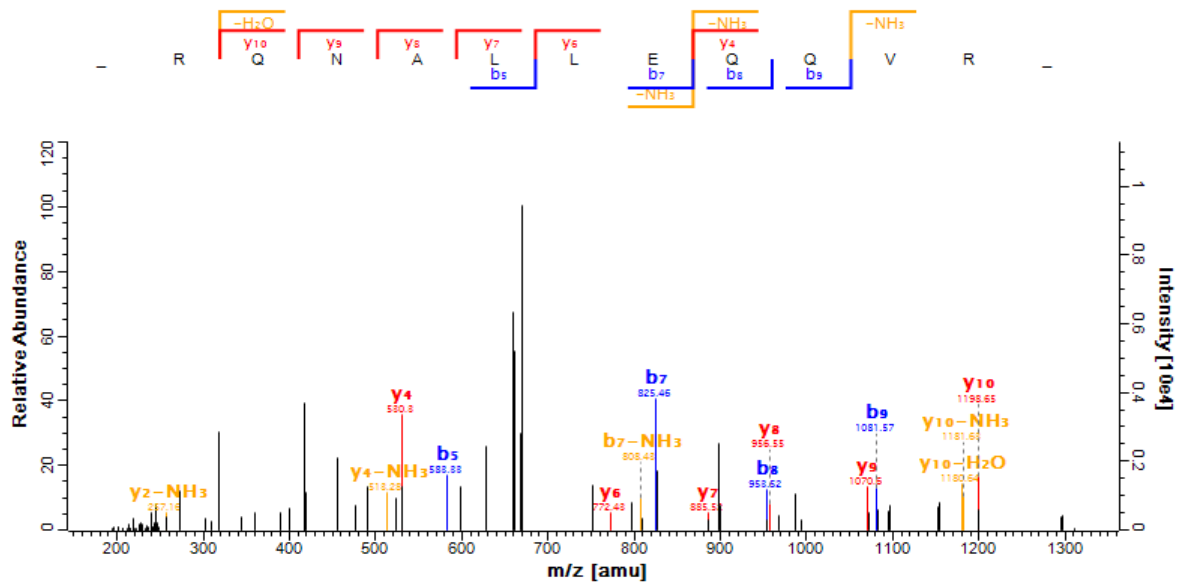

**Protein Group ID:** 1267

**Protein Accession Numbers:** Q9NUM3; Q9NUM3-2; G3V5J8

**Gene Names:** SLC39A9

**Peptide Sequence:** HHQASETHNVIASDK

**Total Number of Spectra:** 3

**Number of Replicates (out of 8):** 3

**Best Match Score:** 107.61

**Best Match Posterior Error Probability:** 0.00014713

**Best Match Spectrum:**

|                    |           |                  |                                   |
|--------------------|-----------|------------------|-----------------------------------|
| <b>Scan number</b> | 3121      | <b>Raw file</b>  | A549-US-WT-top20CID-Elite-2ug-B12 |
| <b>Method</b>      | ITMS; CID | <b>Genenames</b> | SLC39A9                           |

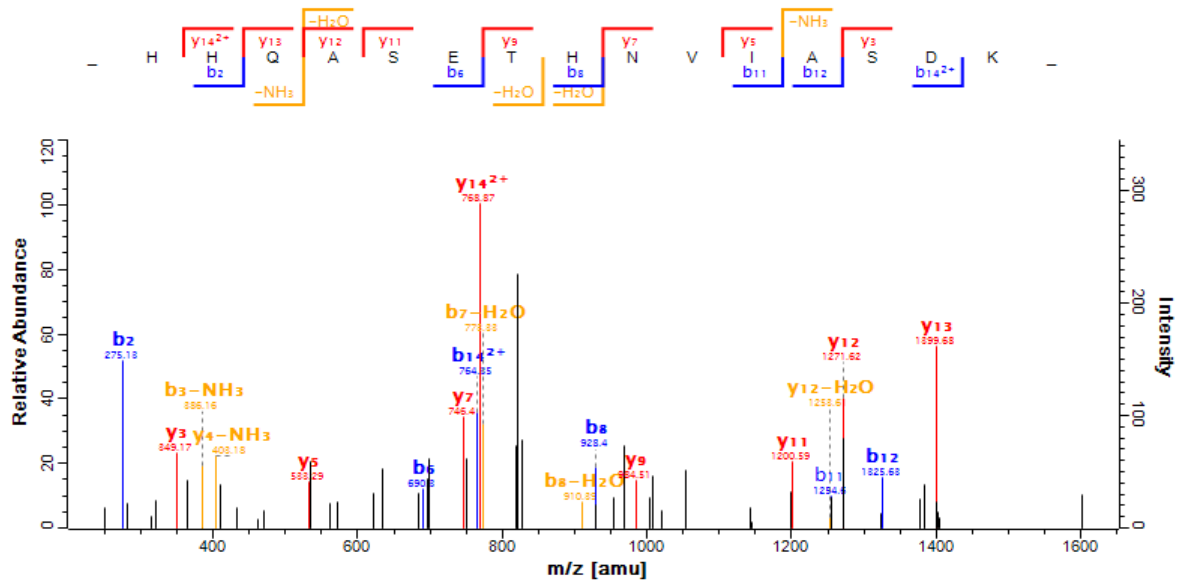

**Protein Group ID:** 1272  
**Protein Accession Numbers:** G3XAE9; Q9Y4F4  
**Gene Names:** FAM179B  
**Peptide Sequence:** PEIALTEALR  
**Total Number of Spectra:** 3  
**Number of Replicates (out of 8):** 3  
**Best Match Score:** 110.76  
**Best Match Posterior Error Probability:** 0.00031437  
**Best Match Spectrum:**

**Scan number** 75842      **Raw file** A549-US-Mock-top20CID-Elite-2ug-B12  
**Method** ITMS; CID      **Genenames** FAM179B

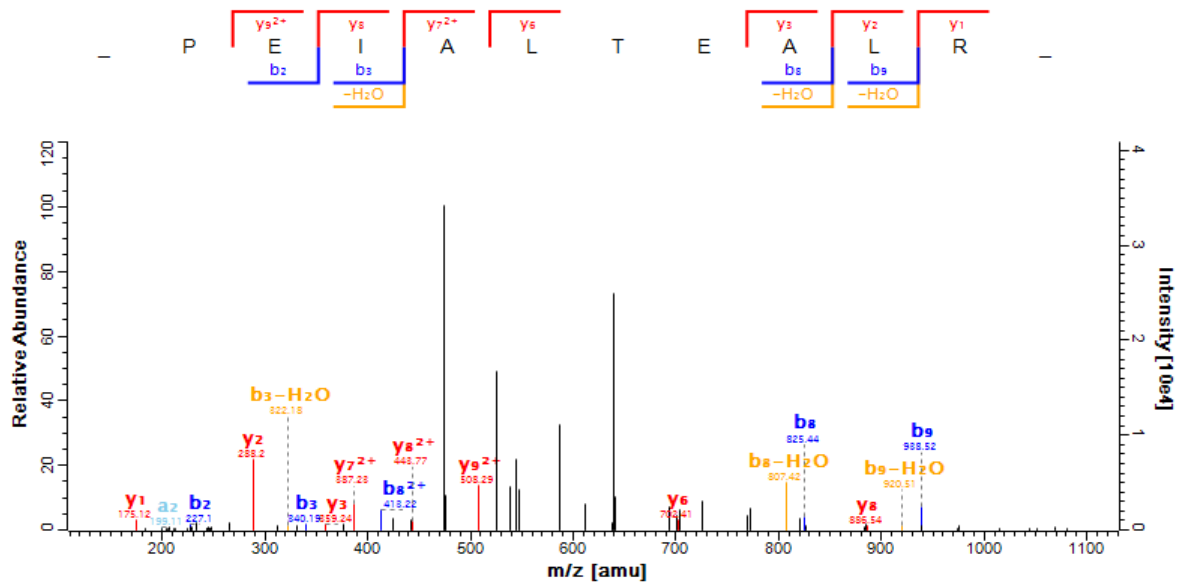

**Protein Group ID:** 1277

**Protein Accession Numbers:** O00754; G5E928; H7BZP0

**Gene Names:** MAN2B1

**Peptide Sequence:** LPVSEGVFVVK

**Total Number of Spectra:** 6

**Number of Replicates (out of 8):** 6

**Best Match Score:** 126.71

**Best Match Posterior Error Probability:** 4.31E-05

**Best Match Spectrum:**

|                    |           |                  |                                   |
|--------------------|-----------|------------------|-----------------------------------|
| <b>Scan number</b> | 48562     | <b>Raw file</b>  | A549-US-WT-top20CID-Elite-2ug-B12 |
| <b>Method</b>      | ITMS; CID | <b>Genenames</b> | MAN2B1                            |

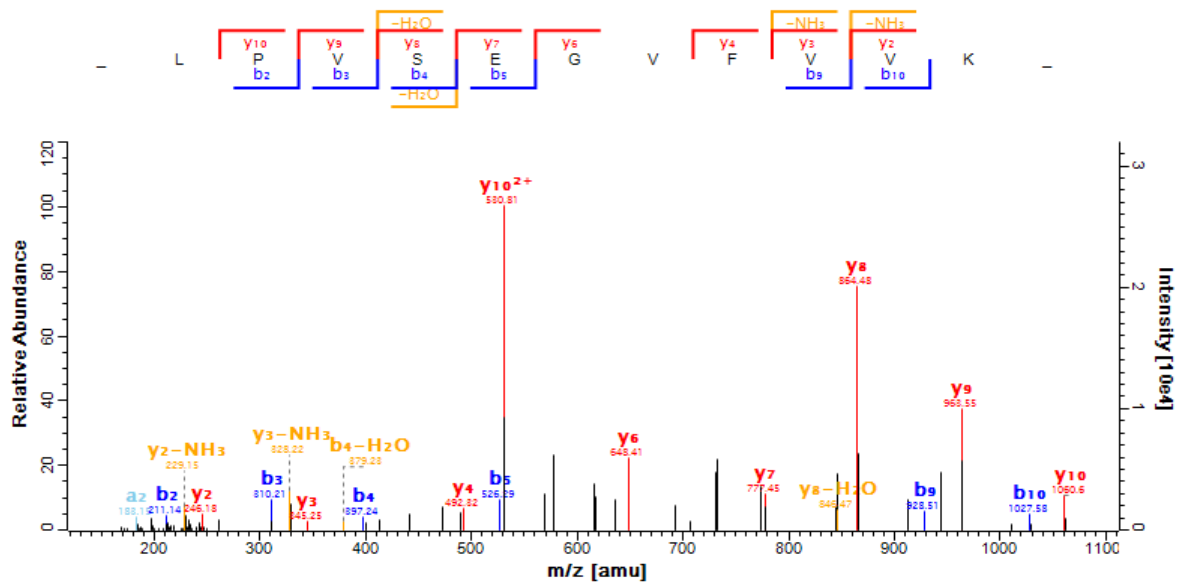

**Protein Group ID:** 1282

**Protein Accession Numbers:** Q15653; Q15653-2; G5E9C2; I3L4X3; I3L1A4

**Gene Names:** NFKB1B

**Peptide Sequence:** LQLEAENYEGHTPLHVAVIHK

**Total Number of Spectra:** 1

**Number of Replicates (out of 8):** 1

**Best Match Score:** 73.918

**Best Match Posterior Error Probability:** 0.0007318

**Best Match Spectrum:**

**Scan number** 42157      **Raw file** A549-US-Mock-top20CID-Elite-2ug-B13  
**Method** ITMS; CID      **Genenames** NFKB1B

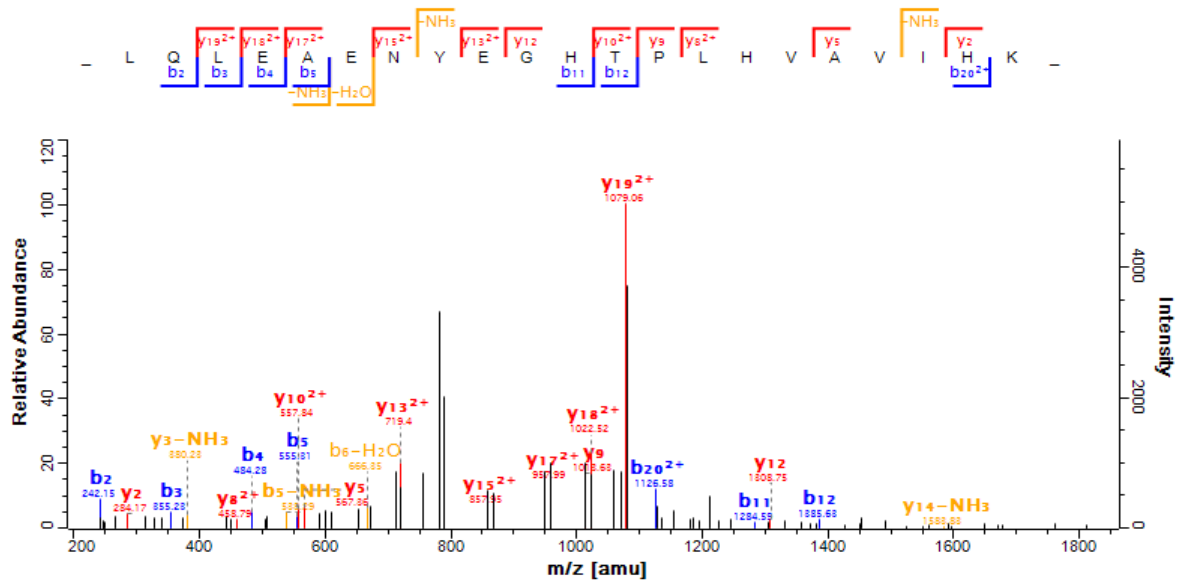



**Protein Group ID:** 1288

**Protein Accession Numbers:** Q02833; Q02833-2; G5E9N9; H0YEI0

**Gene Names:** RASSF7

**Peptide Sequence:** LQALSAATAEAR

**Total Number of Spectra:** 2

**Number of Replicates (out of 8):** 2

**Best Match Score:** 99.566

**Best Match Posterior Error Probability:** 0.00034211

**Best Match Spectrum:**

|                    |           |                  |                                     |
|--------------------|-----------|------------------|-------------------------------------|
| <b>Scan number</b> | 22061     | <b>Raw file</b>  | A549-US-Mock-top20CID-Elite-2ug-B12 |
| <b>Method</b>      | ITMS; CID | <b>Genenames</b> | RASSF7                              |

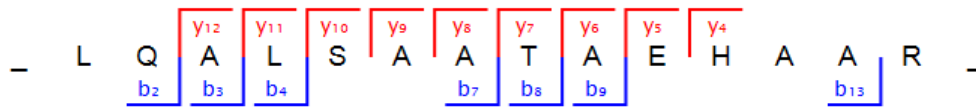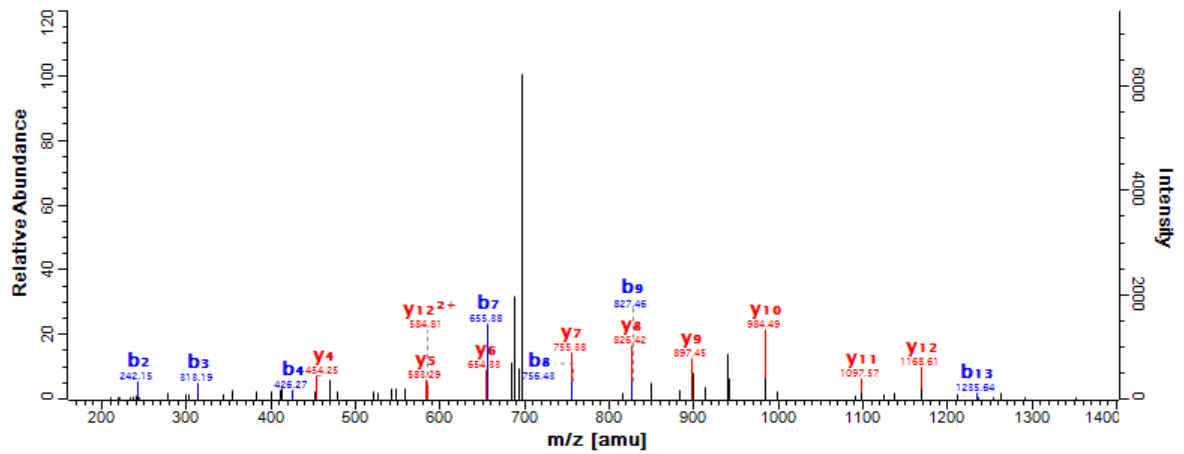

**Protein Group ID:** 1293  
**Protein Accession Numbers:** Q9UQR1; G5E9X2  
**Gene Names:** ZNF148  
**Peptide Sequence:** PFQCSQCDMR  
**Total Number of Spectra:** 4  
**Number of Replicates (out of 8):** 4  
**Best Match Score:** 96.015  
**Best Match Posterior Error Probability:** 0.0012035  
**Best Match Spectrum:**

**Scan number** 12912      **Raw file** A549-US-WT-top20CID-Elite-2ug-B13  
**Method** ITMS; CID      **Genenames** ZNF148

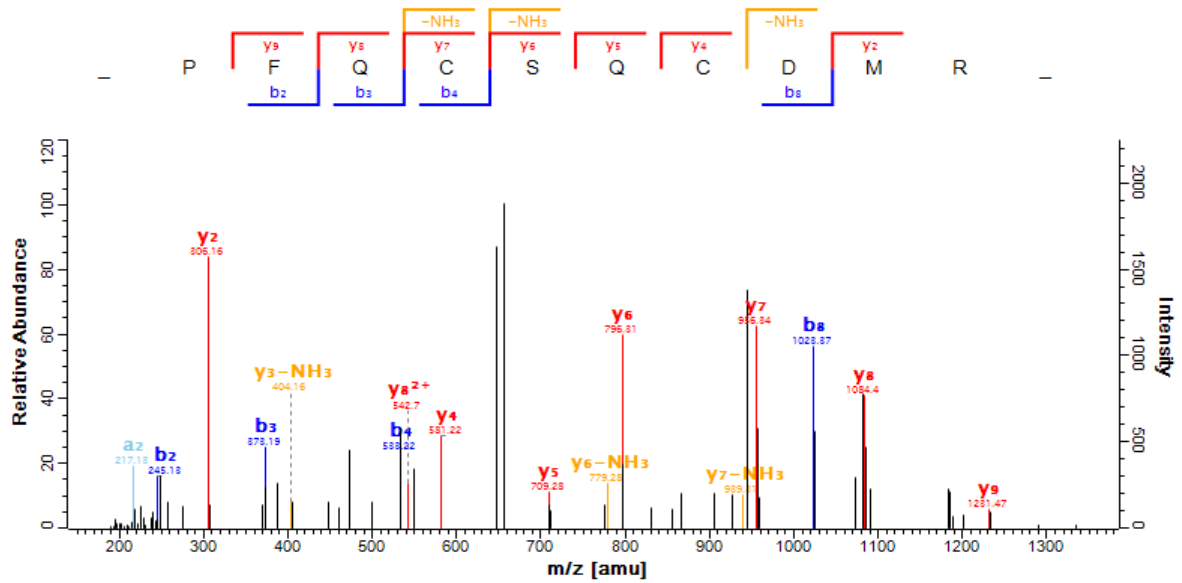

**Protein Group ID:** 1295

**Protein Accession Numbers:** Q96KA5; Q96KA5-2; G5E9Z2

**Gene Names:** CLPTM1L

**Peptide Sequence:** TVHYLPILFIDQLSNR

**Total Number of Spectra:** 7

**Number of Replicates (out of 8):** 7

**Best Match Score:** 139.86

**Best Match Posterior Error Probability:** 2.42E-05

**Best Match Spectrum:**

**Scan number** 81607      **Raw file** A549-US-Mock-top20CID-Elite-2ug-B13  
**Method** ITMS; CID      **Genenames** CLPTM1L

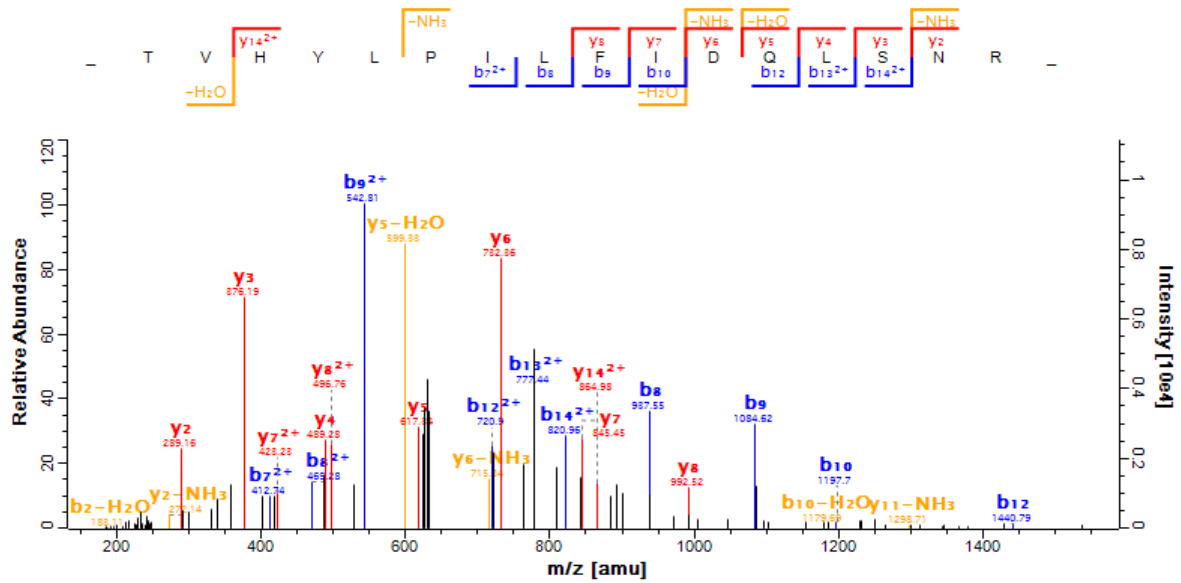

**Protein Group ID:** 1310

**Protein Accession Numbers:** J3KR72; P49848-3; P49848; G8JLM6

**Gene Names:** TAF6

**Peptide Sequence:** AQAALQAQQVNR

**Total Number of Spectra:** 1

**Number of Replicates (out of 8):** 1

**Best Match Score:** 99.752

**Best Match Posterior Error Probability:** 0.00051802

**Best Match Spectrum:**

|                    |           |                  |                                   |
|--------------------|-----------|------------------|-----------------------------------|
| <b>Scan number</b> | 10112     | <b>Raw file</b>  | A549-US-WT-top20CID-Elite-2ug-B14 |
| <b>Method</b>      | ITMS; CID | <b>Genenames</b> | TAF6                              |

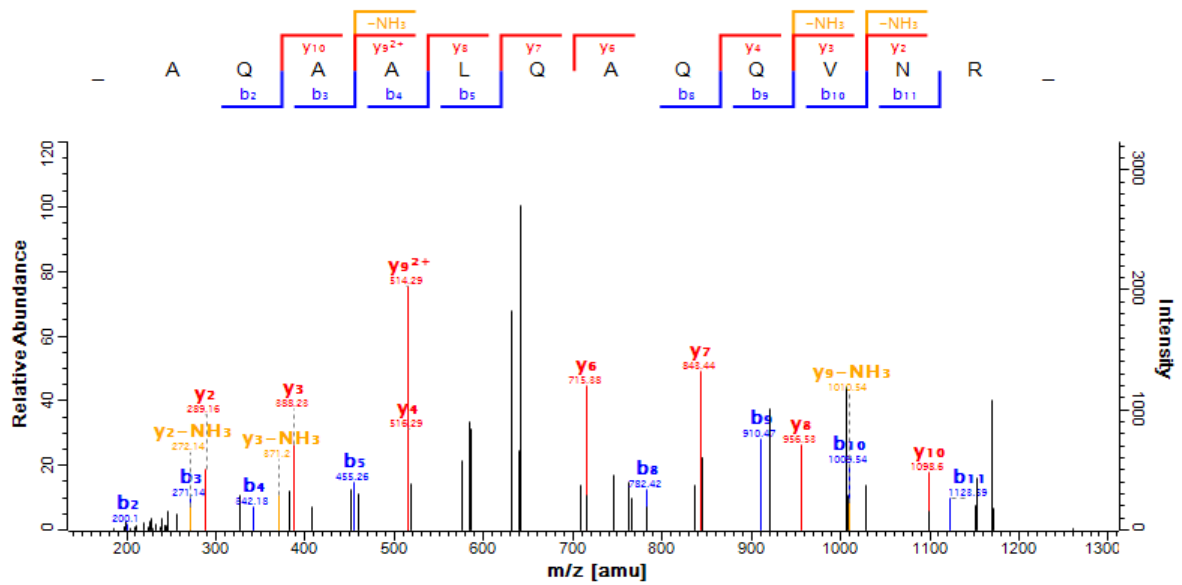

**Protein Group ID:** 1312  
**Protein Accession Numbers:** P47895; H0Y2X5  
**Gene Names:** ALDH1A3  
**Peptide Sequence:** PTVFSEVTDNMR  
**Total Number of Spectra:** 2  
**Number of Replicates (out of 8):** 2  
**Best Match Score:** 99.5  
**Best Match Posterior Error Probability:** 0.00052417  
**Best Match Spectrum:**

**Scan number** 68833      **Raw file** A549-US-WT-top20CID-Elite-2ug-B13  
**Method** ITMS; CID      **Genenames** ALDH1A3

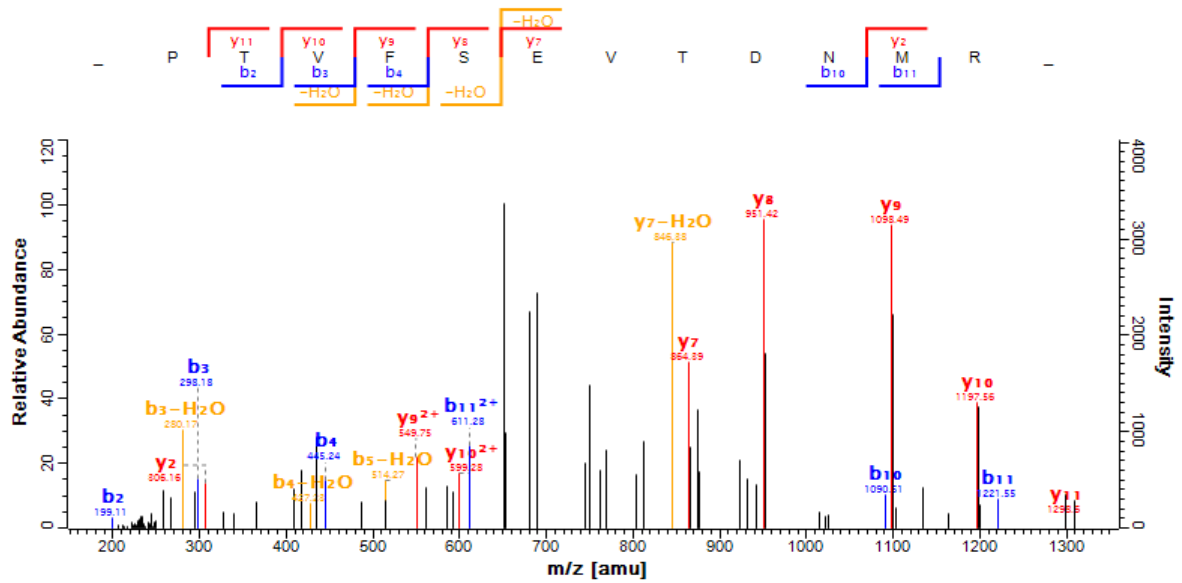

**Protein Group ID:** 1315

**Protein Accession Numbers:** Q13371; H0Y3M0; H0Y5D3

**Gene Names:** PDCL

**Peptide Sequence:** QLETEQREEQCR

**Total Number of Spectra:** 1

**Number of Replicates (out of 8):** 1

**Best Match Score:** 126.71

**Best Match Posterior Error Probability:** 0.00046359

**Best Match Spectrum:**

**Scan number** 3897      **Raw file** A549-US-Mock-top20CID-Elite-2ug-B12  
**Method** ITMS; CID      **Genenames** PDCL

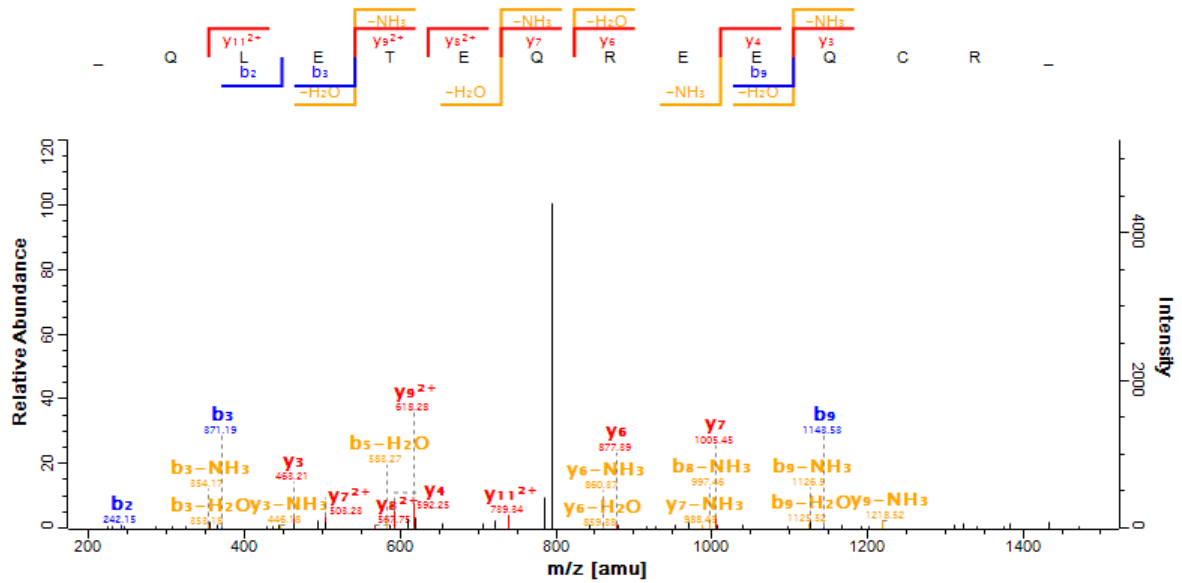

**Protein Group ID:** 1316

**Protein Accession Numbers:** Q53EZ4; Q53EZ4-2; H0Y432

**Gene Names:** CEP55

**Peptide Sequence:** KPESGYLQEEK

**Total Number of Spectra:** 3

**Number of Replicates (out of 8):** 3

**Best Match Score:** 148.62

**Best Match Posterior Error Probability:** 1.11E-05

**Best Match Spectrum:**

**Scan number** 9937      **Raw file** A549-US-Mock-top20CID-Elite-2ug-B12  
**Method** ITMS; CID      **Genenames** CEP55

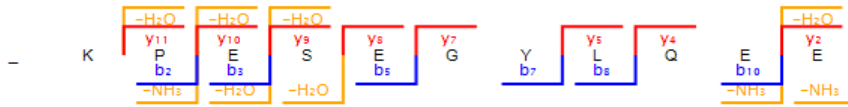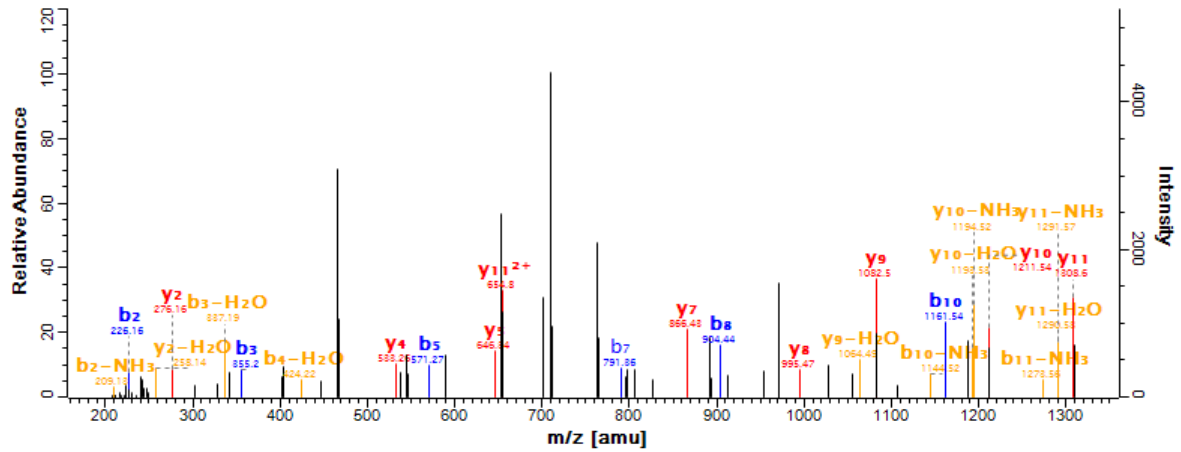

**Protein Group ID:** 1319

**Protein Accession Numbers:** Q9Y4B6; Q9Y4B6-2; H0Y4P3; Q9Y4B6-3

**Gene Names:** VPRBP

**Peptide Sequence:** EADLPMTAASHSSAFTPTAAASPVSLPR

**Total Number of Spectra:** 5

**Number of Replicates (out of 8):** 4

**Best Match Score:** 76.152

**Best Match Posterior Error Probability:** 1.23E-05

**Best Match Spectrum:**

|                    |           |                  |                                     |
|--------------------|-----------|------------------|-------------------------------------|
| <b>Scan number</b> | 59697     | <b>Raw file</b>  | A549-US-Mock-top20CID-Elite-2ug-B11 |
| <b>Method</b>      | ITMS; CID | <b>Genenames</b> | VPRBP                               |

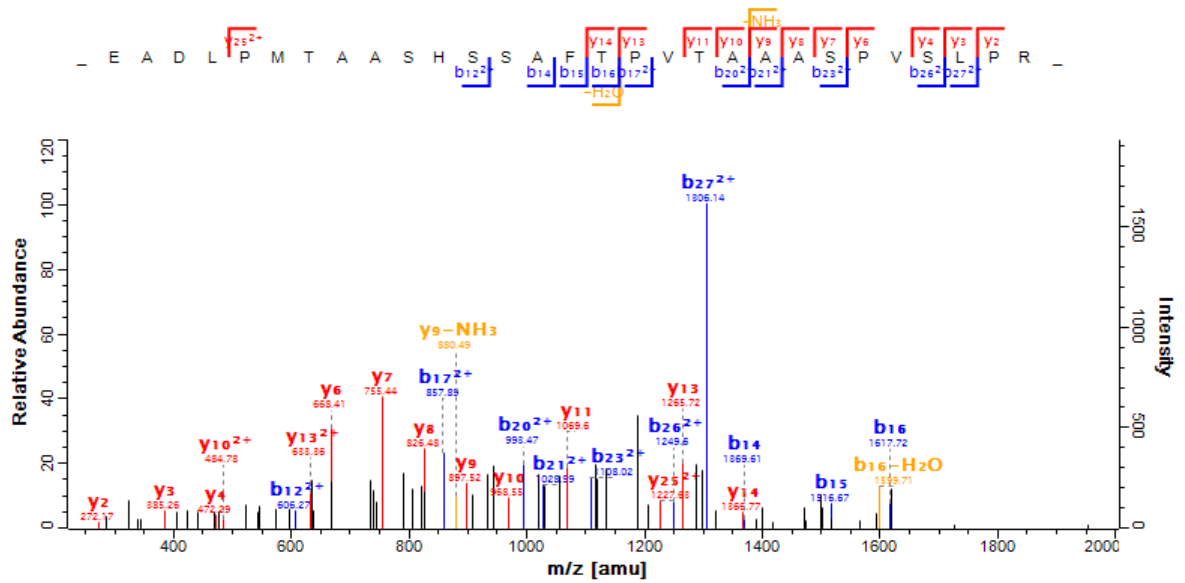



**Protein Group ID:** 1321

**Protein Accession Numbers:** Q14687; Q14687-3; Q14687-2; H0Y613

**Gene Names:** GSE1; KIAA0182

**Peptide Sequence:** PQLHAAPTALWNPVSLMDNTLETR

**Total Number of Spectra:** 2

**Number of Replicates (out of 8):** 2

**Best Match Score:** 72.564

**Best Match Posterior Error Probability:** 0.00034403

**Best Match Spectrum:**

**Scan number** 82732      **Raw file** A549-US-Mock-top20CID-Elite-2ug-B13  
**Method** ITMS; CID      **Genenames** GSE1; KIAA0182

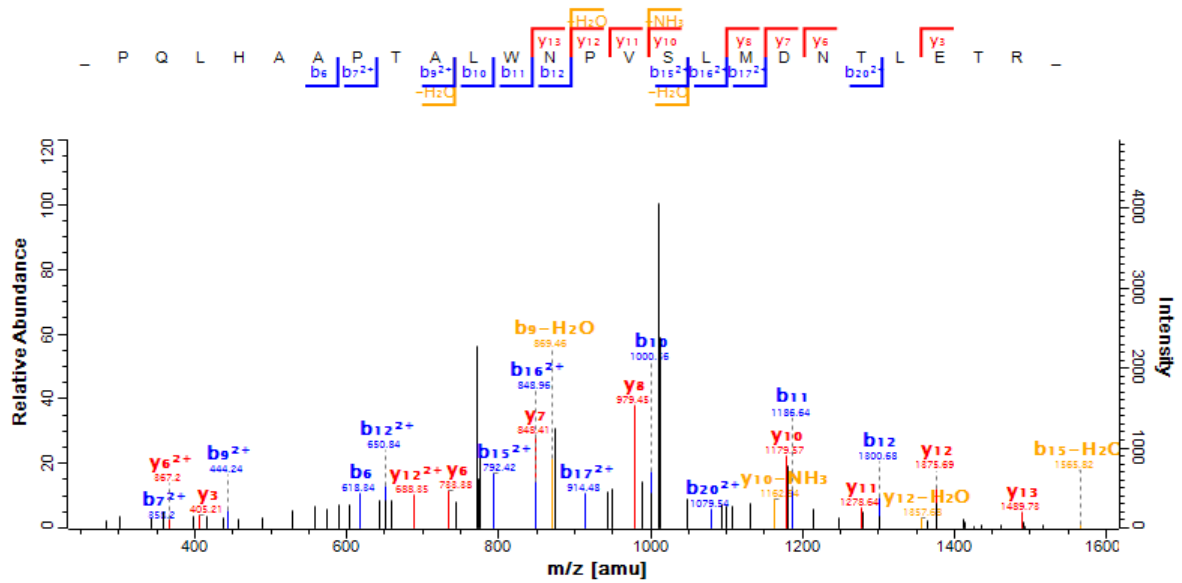

**Protein Group ID:** 1324

**Protein Accession Numbers:** Q02447; Q02447-2; H0Y7L6; Q02447-6; H0Y6K5; Q02447-5; Q02447-3; Q02447-4

**Gene Names:** SP3

**Peptide Sequence:** VQVVDEEGDQQHQEGK

**Total Number of Spectra:** 10

**Number of Replicates (out of 8):** 8

**Best Match Score:** 290.95

**Best Match Posterior Error Probability:** 8.34E-156

**Best Match Spectrum:**

|                    |           |                  |                                   |
|--------------------|-----------|------------------|-----------------------------------|
| <b>Scan number</b> | 8241      | <b>Raw file</b>  | A549-US-WT-top20CID-Elite-2ug-B12 |
| <b>Method</b>      | ITMS: CID | <b>Genenames</b> | SP3                               |

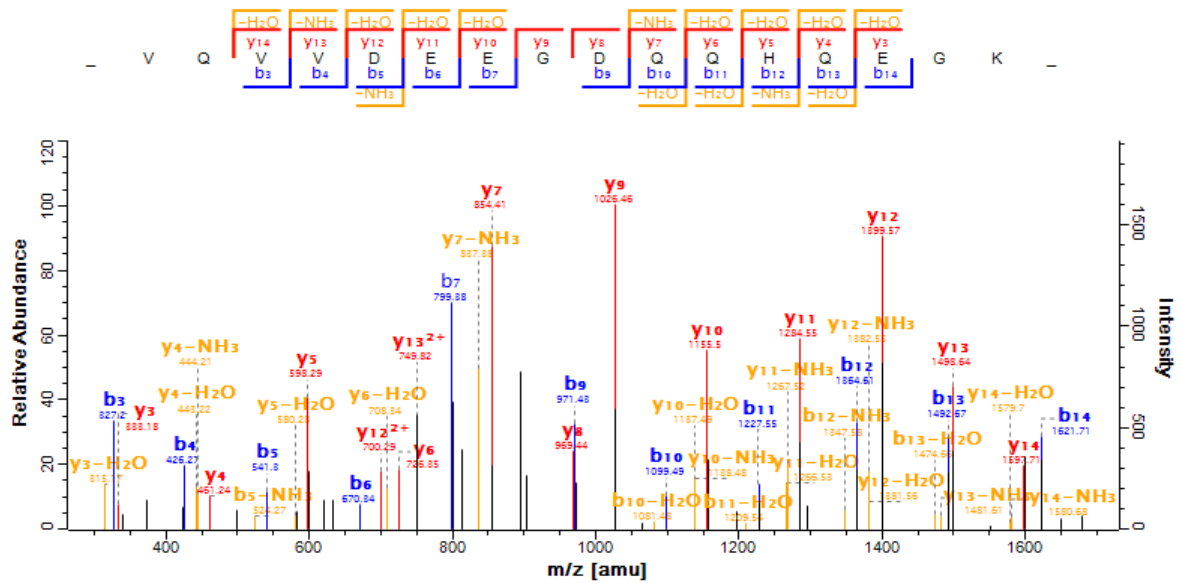

**Protein Group ID:** 1328

**Protein Accession Numbers:** Q6ZNJ1; Q6ZNJ1-3; Q6ZNJ1-2; H0Y764

**Gene Names:** NBEAL2

**Peptide Sequence:** YGVQFILDALR

**Total Number of Spectra:** 2

**Number of Replicates (out of 8):** 2

**Best Match Score:** 148.18

**Best Match Posterior Error Probability:** 1.34E-05

**Best Match Spectrum:**

**Scan number** 81756      **Raw file** A549-US-Mock-top20CID-Elite-2ug-B12  
**Method** ITMS; CID      **Genenames** NBEAL2

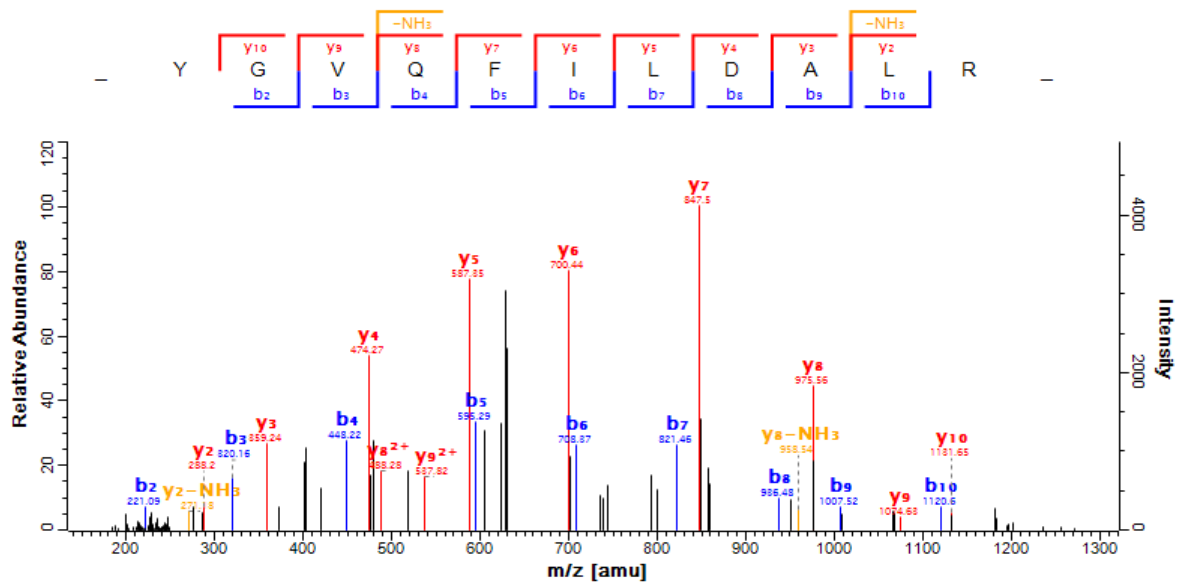



**Protein Group ID:** 1332  
**Protein Accession Numbers:** Q7Z3E2; H0Y7V5  
**Gene Names:** C10orf118  
**Peptide Sequence:** EDINSHVIKVK  
**Total Number of Spectra:** 2  
**Number of Replicates (out of 8):** 2  
**Best Match Score:** 100.69  
**Best Match Posterior Error Probability:** 0.0022397  
**Best Match Spectrum:**

**Scan number** 35019      **Raw file** A549-US-WT-top20CID-Elite-2ug-B11  
**Method** ITMS; CID      **Genenames** C10orf118

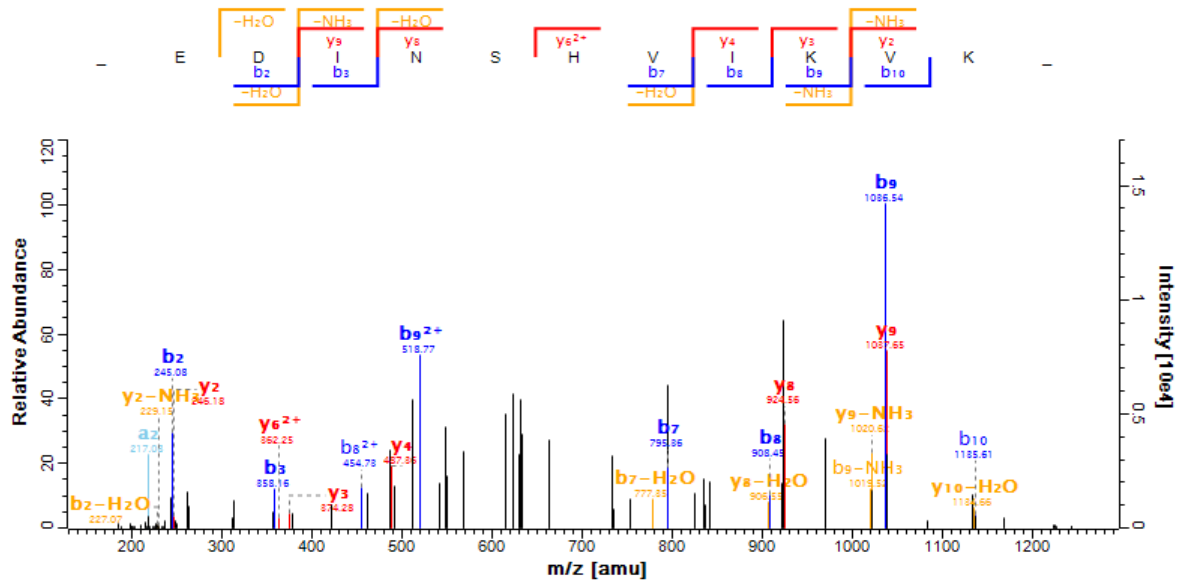

**Protein Group ID:** 1333

**Protein Accession Numbers:** Q4LE39; Q4LE39-2; Q4LE39-3; Q4LE39-4; H7C5R6; H0Y7Y8

**Gene Names:** ARID4B

**Peptide Sequence:** EEQNSSSLLEENK

**Total Number of Spectra:** 1

**Number of Replicates (out of 8):** 1

**Best Match Score:** 87.498

**Best Match Posterior Error Probability:** 0.0016454

**Best Match Spectrum:**

**Scan number** 16339      **Raw file** A549-US-WT-top20CID-Elite-2ug-B12  
**Method** ITMS: CID      **Genenames** ARID4B

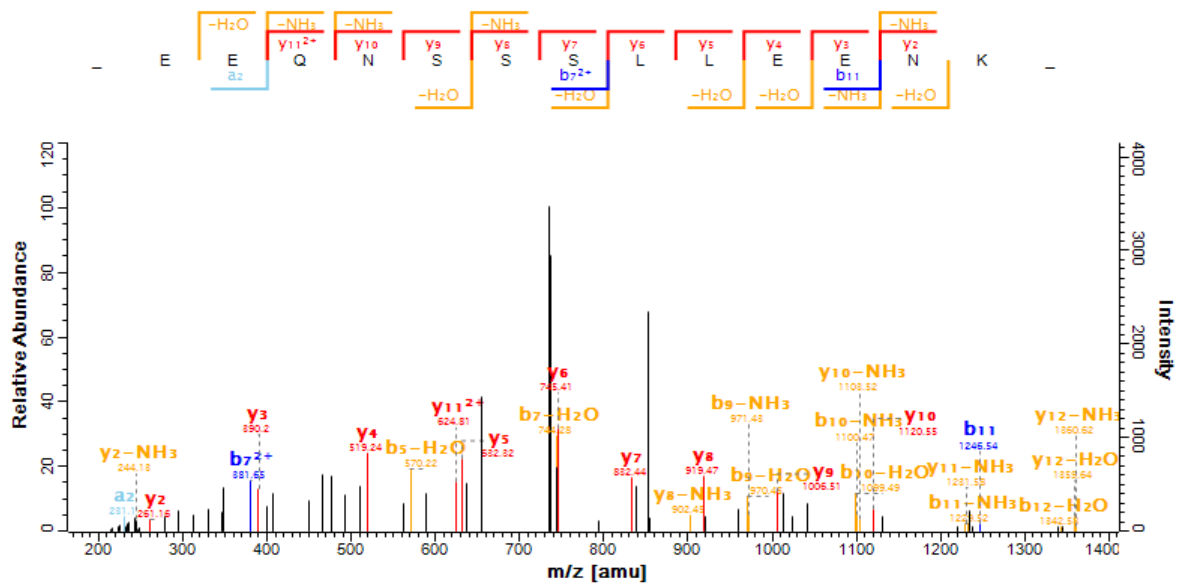

**Protein Group ID:** 1339

**Protein Accession Numbers:** Q9Y2E5; Q9Y2E5-2; H0YA68

**Gene Names:** MAN2B2

**Peptide Sequence:** PPQDGVYPNMSEPVTPANINLYAEALVANVK

**Total Number of Spectra:** 1

**Number of Replicates (out of 8):** 1

**Best Match Score:** 46.399

**Best Match Posterior Error Probability:** 0.0041571

**Best Match Spectrum:**

**Scan number** 81397      **Raw file** A549-US-WT-top20CID-Elite-2ug-B11  
**Method** ITMS; CID      **Genenames** MAN2B2

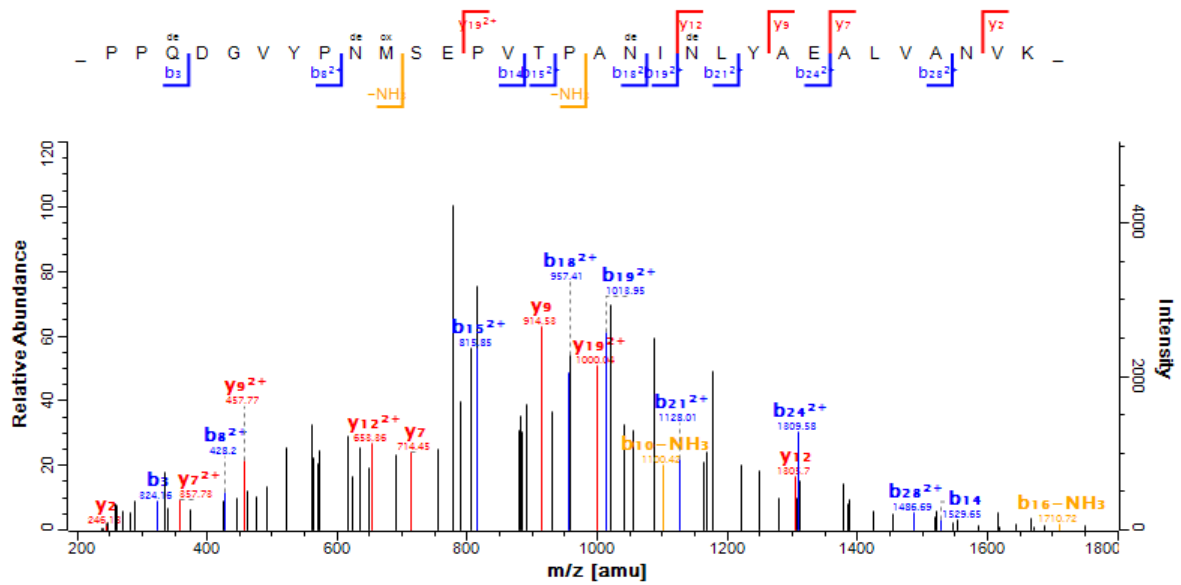

**Protein Group ID:** 1340  
**Protein Accession Numbers:** H0YAA8; Q9H204  
**Gene Names:** MED28  
**Peptide Sequence:** HWQQVLEDINVQHK  
**Total Number of Spectra:** 2  
**Number of Replicates (out of 8):** 2  
**Best Match Score:** 96.866  
**Best Match Posterior Error Probability:** 0.00054379  
**Best Match Spectrum:**

**Scan number** 43400      **Raw file** A549-US-WT-top20CID-Elite-2ug-B12  
**Method** ITMS; CID      **Genenames** MED28

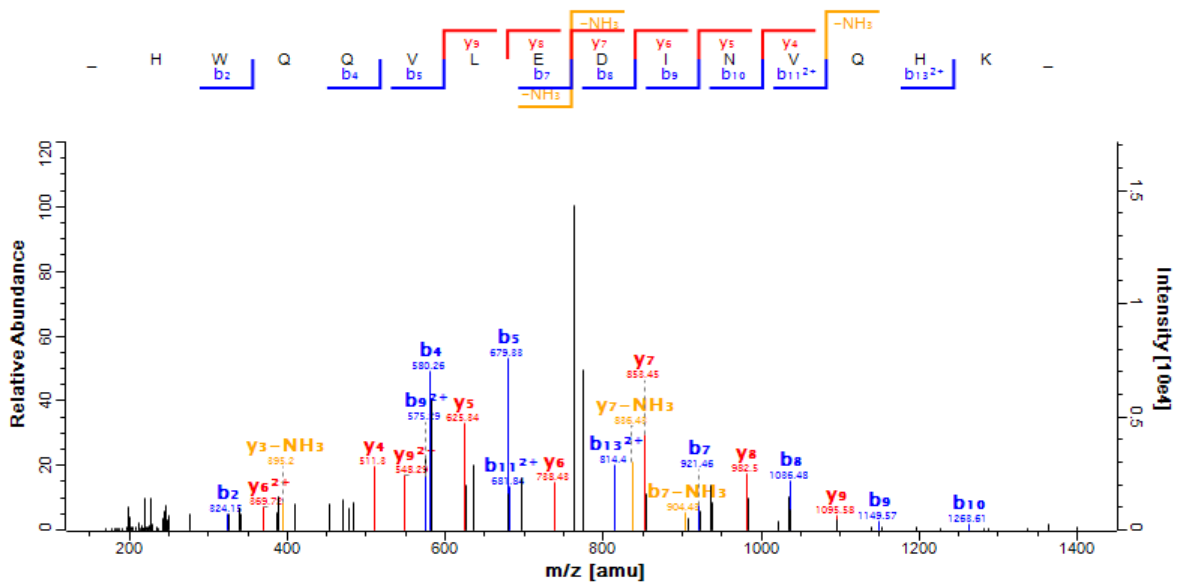



**Protein Group ID:** 1341

**Protein Accession Numbers:** Q7Z6I8; Q7Z6I8-2; H0YAE0

**Gene Names:** C5orf24

**Peptide Sequence:** AADQFDIYSSQSK

**Total Number of Spectra:** 1

**Number of Replicates (out of 8):** 1

**Best Match Score:** 96.163

**Best Match Posterior Error Probability:** 0.0023271

**Best Match Spectrum:**

**Scan number** 30168      **Raw file** A549-US-WT-top20CID-Elite-2ug-B12  
**Method** ITMS; CID      **Genenames** C5orf24

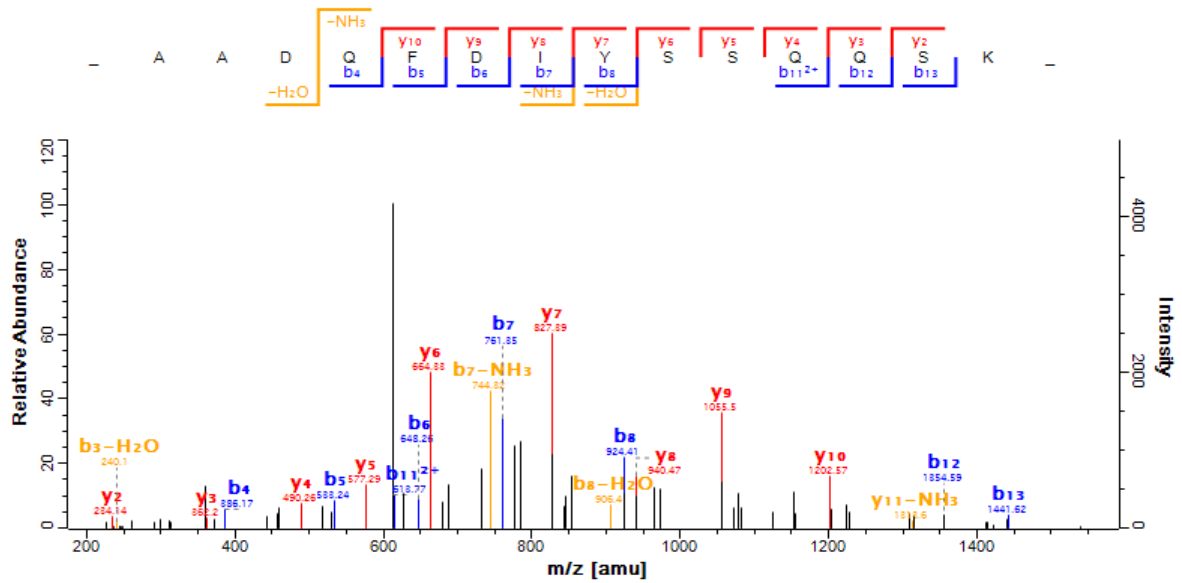

**Protein Group ID:** 1346

**Protein Accession Numbers:** Q8TEY7; Q8TEY7-2; Q8TEY7-3; H0YCV3; H0YD08

**Gene Names:** USP33

**Peptide Sequence:** ISTHVSFPLEGLDLPQLPFLAK

**Total Number of Spectra:** 1

**Number of Replicates (out of 8):** 1

**Best Match Score:** 69.188

**Best Match Posterior Error Probability:** 0.002106

**Best Match Spectrum:**

**Scan number** 84050      **Raw file** A549-US-Mock-top20CID-Elite-2ug-B13  
**Method** ITMS; CID      **Genenames** USP33

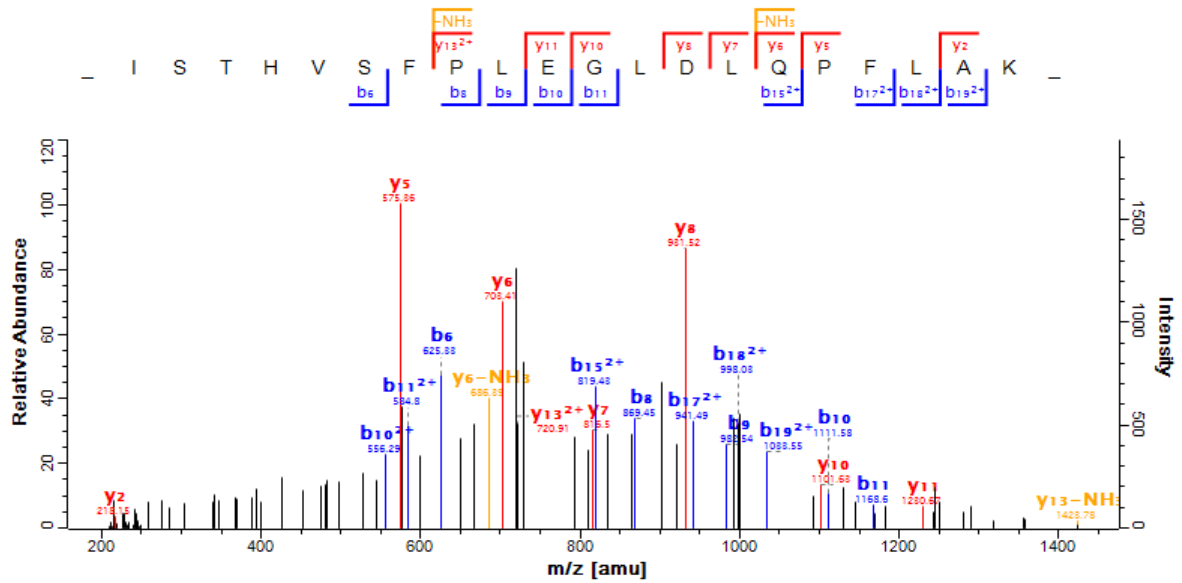

**Protein Group ID:** 1350  
**Protein Accession Numbers:** H0YDY8  
**Gene Names:** AMPD3  
**Peptide Sequence:** PPYSYYLYYMYANIMVLLNNLR  
**Total Number of Spectra:** 1  
**Number of Replicates (out of 8):** 1  
**Best Match Score:** 12.663  
**Best Match Posterior Error Probability:** 0.0036502  
**Best Match Spectrum:**

**Scan number** 12817      **Raw file** A549-US-Mock-top20CID-Elite-2ug-B14  
**Method** ITMS; CID      **Genenames** AMPD3

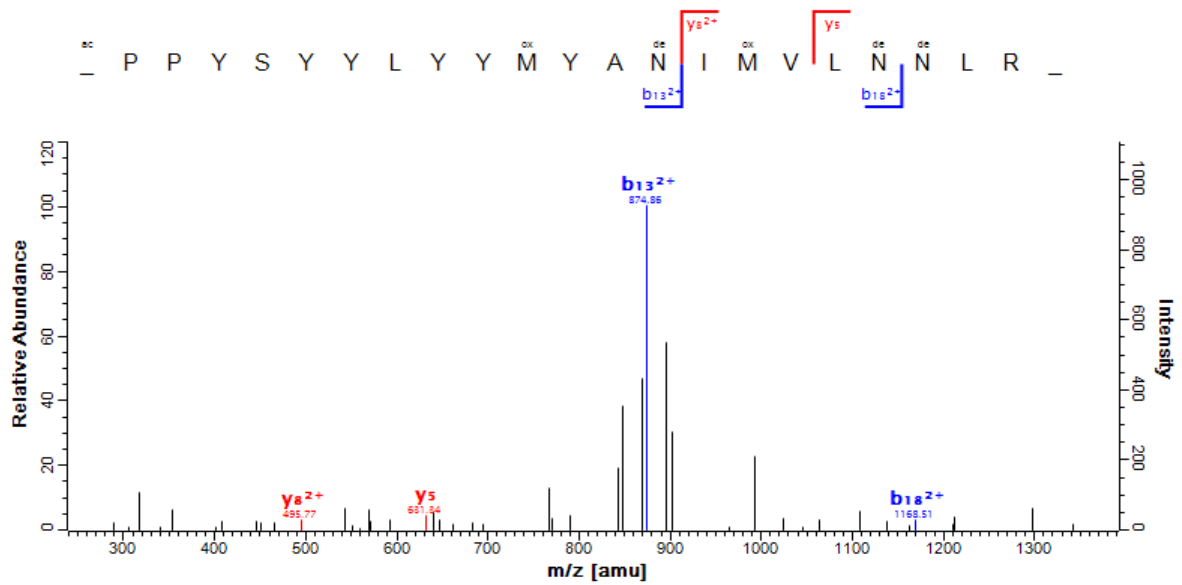

**Protein Group ID:** 1356  
**Protein Accession Numbers:** P00736; H0YFH3  
**Gene Names:** CIR  
**Peptide Sequence:** VLNYVDWIK  
**Total Number of Spectra:** 1  
**Number of Replicates (out of 8):** 1  
**Best Match Score:** 104.05  
**Best Match Posterior Error Probability:** 0.0014539  
**Best Match Spectrum:**

**Scan number** 59712      **Raw file** A549-US-WT-top20CID-Elite-2ug-B12  
**Method** ITMS; CID      **Genenames** CIR

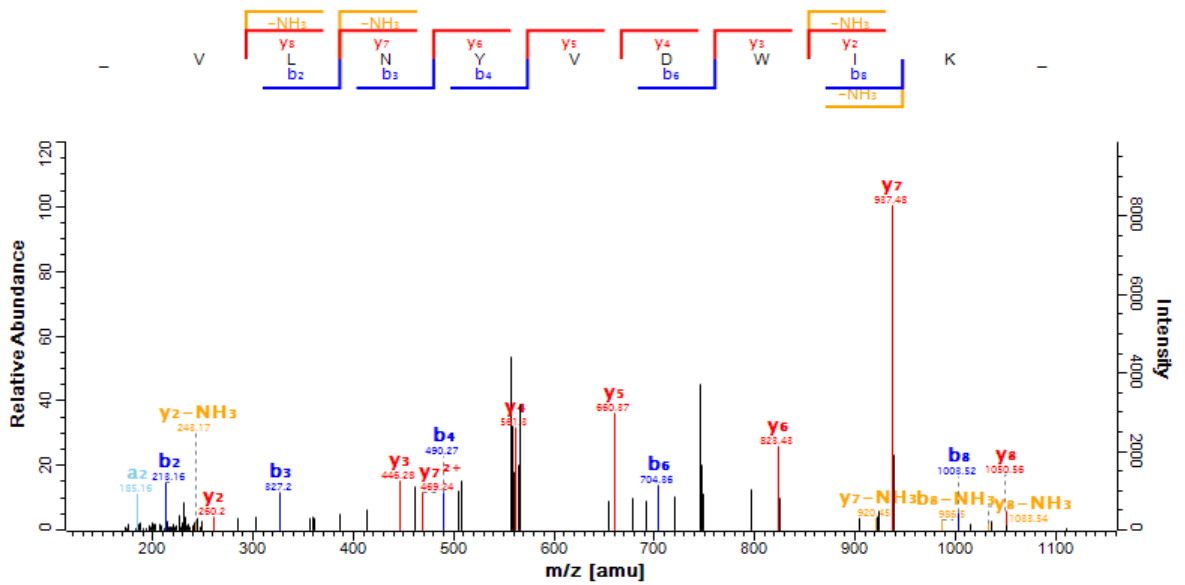

**Protein Group ID:** 1357  
**Protein Accession Numbers:** P50336; H0YFP3  
**Gene Names:** PPOX  
**Peptide Sequence:** GGLEMLPQALEHTSR  
**Total Number of Spectra:** 9  
**Number of Replicates (out of 8):** 6  
**Best Match Score:** 101.42  
**Best Match Posterior Error Probability:** 0.00016293  
**Best Match Spectrum:**

**Scan number** 65295      **Raw file** A549-US-WT-top20CID-Elite-2ug-B12  
**Method** ITMS; CID      **Genenames** PPOX

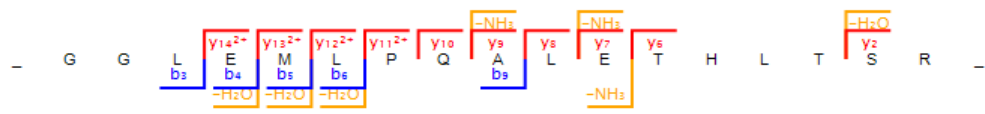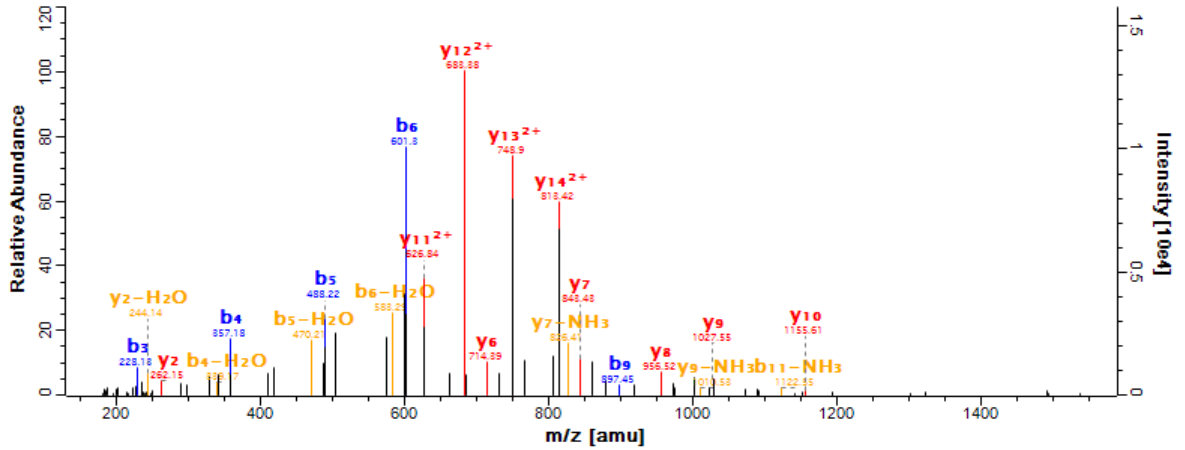

**Protein Group ID:** 1358

**Protein Accession Numbers:** Q9UJ78; H0YH25; Q9UJ78-5; Q9UJ78-1

**Gene Names:** ZMYM5

**Peptide Sequence:** QNFQPTAQQQLTKPAK

**Total Number of Spectra:** 1

**Number of Replicates (out of 8):** 1

**Best Match Score:** 102.5

**Best Match Posterior Error Probability:** 0.0018186

**Best Match Spectrum:**

**Scan number** 29425      **Raw file** A549-US-WT-top20CID-Elite-2ug-B11  
**Method** ITMS; CID      **Genenames** ZMYM5

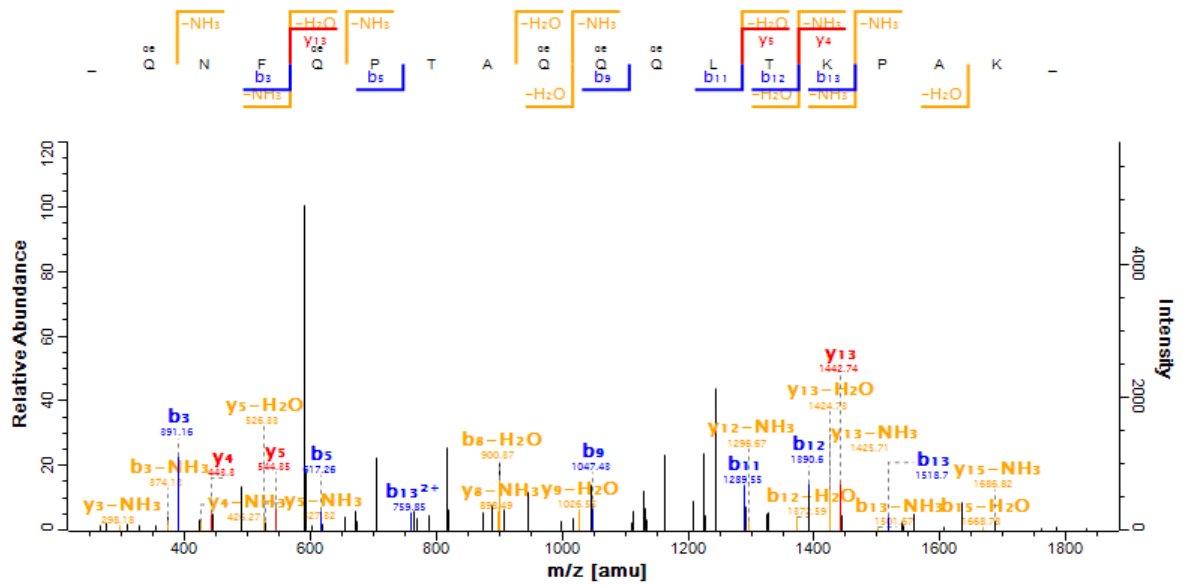

**Protein Group ID:** 1363

**Protein Accession Numbers:** P51948; H0YJF2; H0YJ92

**Gene Names:** MNAT1

**Peptide Sequence:** QAFLDELESSDLPVALLA QHK

**Total Number of Spectra:** 3

**Number of Replicates (out of 8):** 3

**Best Match Score:** 106.28

**Best Match Posterior Error Probability:** 4.57E-06

**Best Match Spectrum:**

|                    |           |                  |                                     |
|--------------------|-----------|------------------|-------------------------------------|
| <b>Scan number</b> | 89158     | <b>Raw file</b>  | A549-US-Mock-top20CID-Elite-2ug-B14 |
| <b>Method</b>      | ITMS; CID | <b>Genenames</b> | MNAT1                               |

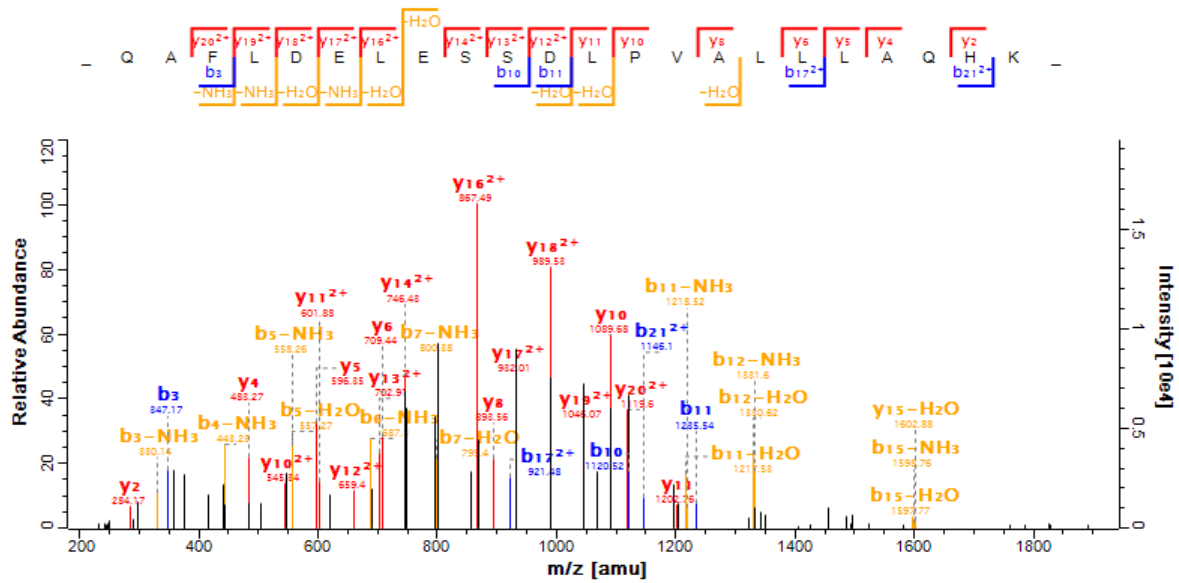

**Protein Group ID:** 1366

**Protein Accession Numbers:** Q5J8M3; Q5J8M3-2; Q5J8M3-3; H0YLP8; H0YNK8; H0YNK0; H0YK61

**Gene Names:** TMEM85

**Peptide Sequence:** GSGQGDSLYPVGYLDK

**Total Number of Spectra:** 8

**Number of Replicates (out of 8):** 5

**Best Match Score:** 168.05

**Best Match Posterior Error Probability:** 8.24E-11

**Best Match Spectrum:**

**Scan number** 46791      **Raw file** A549-US-Mock-top20CID-Elite-2ug-B12  
**Method** ITMS: CID      **Genenames** TMEM85

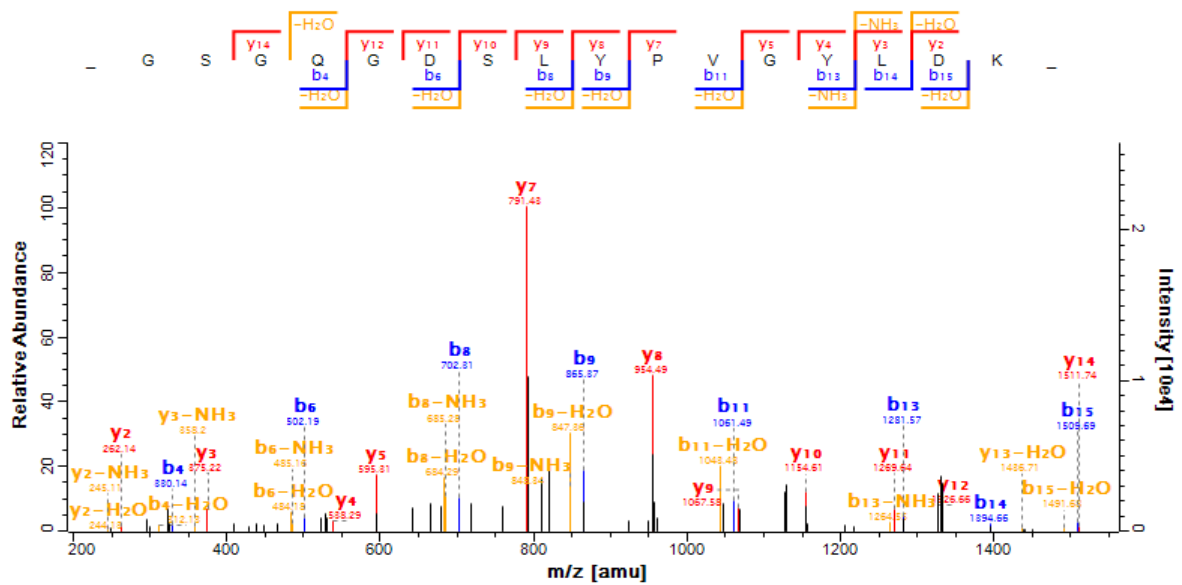



**Protein Group ID:** 1368

**Protein Accession Numbers:** Q9NZD8; H0YKB0; H0YMB7

**Gene Names:** SPG21

**Peptide Sequence:** VHLFGASLGGFLAQQK

**Total Number of Spectra:** 5

**Number of Replicates (out of 8):** 5

**Best Match Score:** 112.5

**Best Match Posterior Error Probability:** 0.0001104

**Best Match Spectrum:**

|                    |           |                  |                                     |
|--------------------|-----------|------------------|-------------------------------------|
| <b>Scan number</b> | 64483     | <b>Raw file</b>  | A549-US-Mock-top20CID-Elite-2ug-B14 |
| <b>Method</b>      | ITMS; CID | <b>Genenames</b> | SPG21                               |

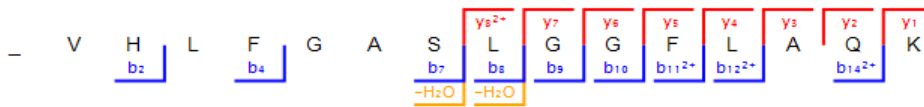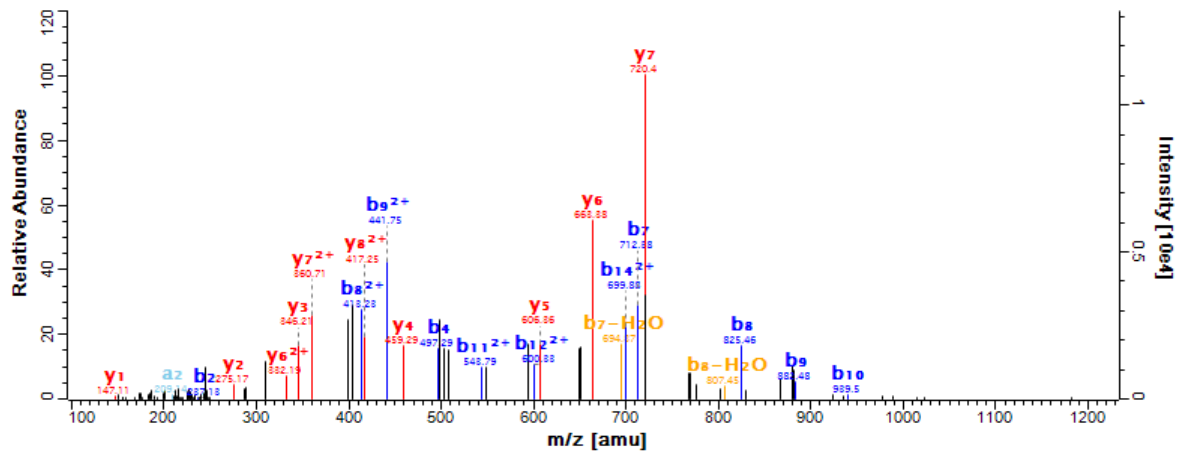

**Protein Group ID:** 1370

**Protein Accession Numbers:** Q8N4P3; H0YKT9; H0YNP9; Q8N4P3-2

**Gene Names:** HDDC3

**Peptide Sequence:** RLQVEQAPHSSPGAK

**Total Number of Spectra:** 9

**Number of Replicates (out of 8):** 6

**Best Match Score:** 115.91

**Best Match Posterior Error Probability:** 0.000198

**Best Match Spectrum:**

|                    |           |                  |                                   |
|--------------------|-----------|------------------|-----------------------------------|
| <b>Scan number</b> | 8237      | <b>Raw file</b>  | A549-US-WT-top20CID-Elite-2ug-B14 |
| <b>Method</b>      | ITMS; CID | <b>Genenames</b> | HDDC3                             |

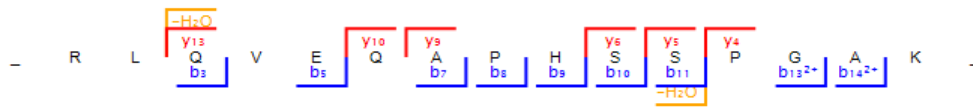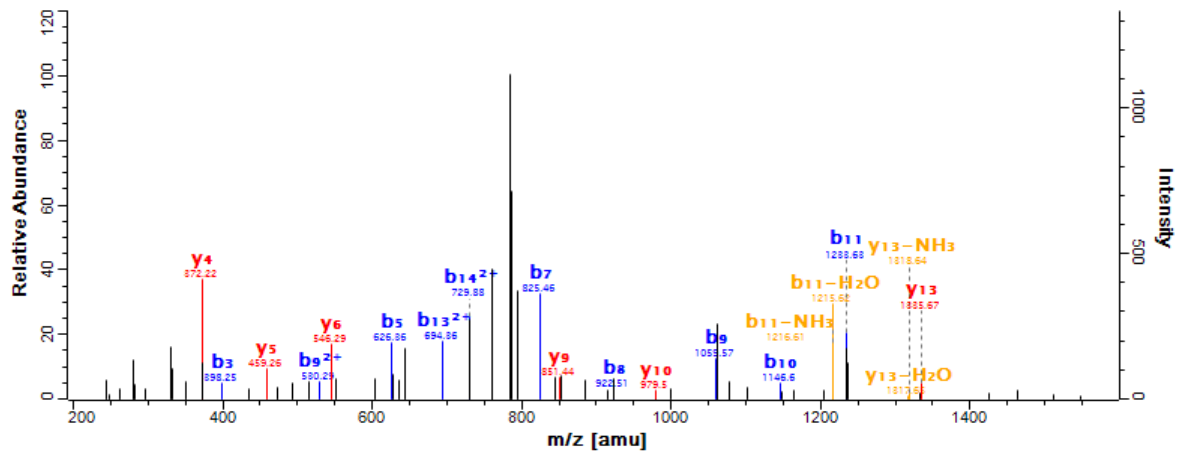

**Protein Group ID:** 1372  
**Protein Accession Numbers:** Q9UPM8; H0YKX4  
**Gene Names:** AP4E1  
**Peptide Sequence:** LLAEGFDDETEDQQLR  
**Total Number of Spectra:** 1  
**Number of Replicates (out of 8):** 1  
**Best Match Score:** 178.03  
**Best Match Posterior Error Probability:** 1.01E-14  
**Best Match Spectrum:**

**Scan number** 42455      **Raw file** A549-US-Mock-top20CID-Elite-2ug-B12  
**Method** ITMS; CID      **Genenames** AP4E1

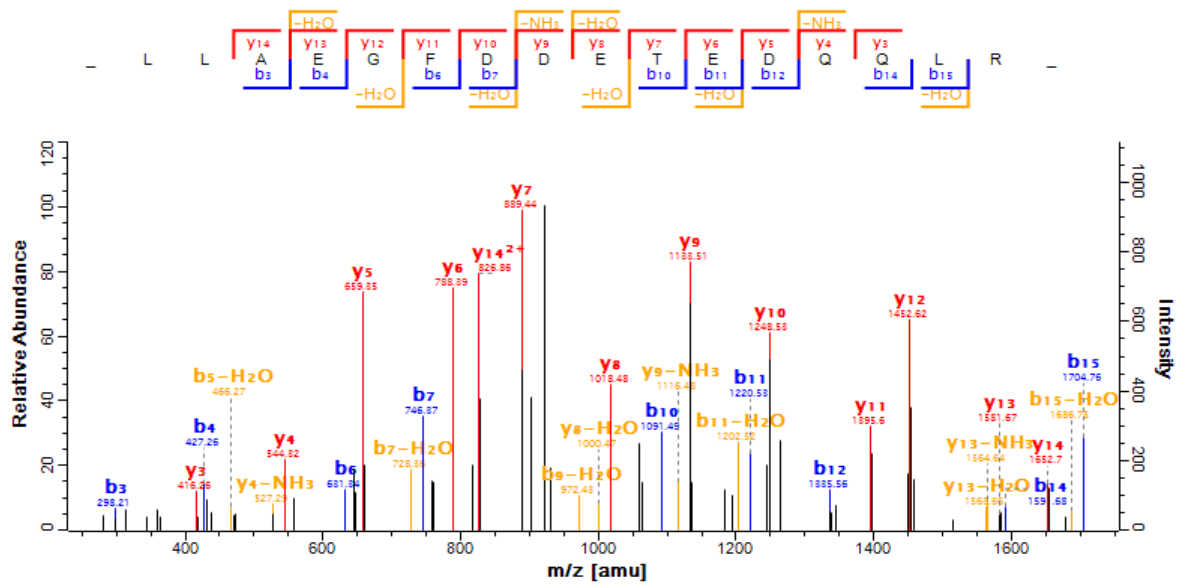

**Protein Group ID:** 1378

**Protein Accession Numbers:** O94788; O94788-3; H0YMG7; O94788-2; H0YM00

**Gene Names:** ALDH1A2

**Peptide Sequence:** IFVEESIYEEFVR

**Total Number of Spectra:** 1

**Number of Replicates (out of 8):** 1

**Best Match Score:** 155.86

**Best Match Posterior Error Probability:** 1.99E-07

**Best Match Spectrum:**

|                    |           |                  |                                     |
|--------------------|-----------|------------------|-------------------------------------|
| <b>Scan number</b> | 80074     | <b>Raw file</b>  | A549-US-Mock-top20CID-Elite-2ug-B14 |
| <b>Method</b>      | ITMS; CID | <b>Genenames</b> | ALDH1A2                             |

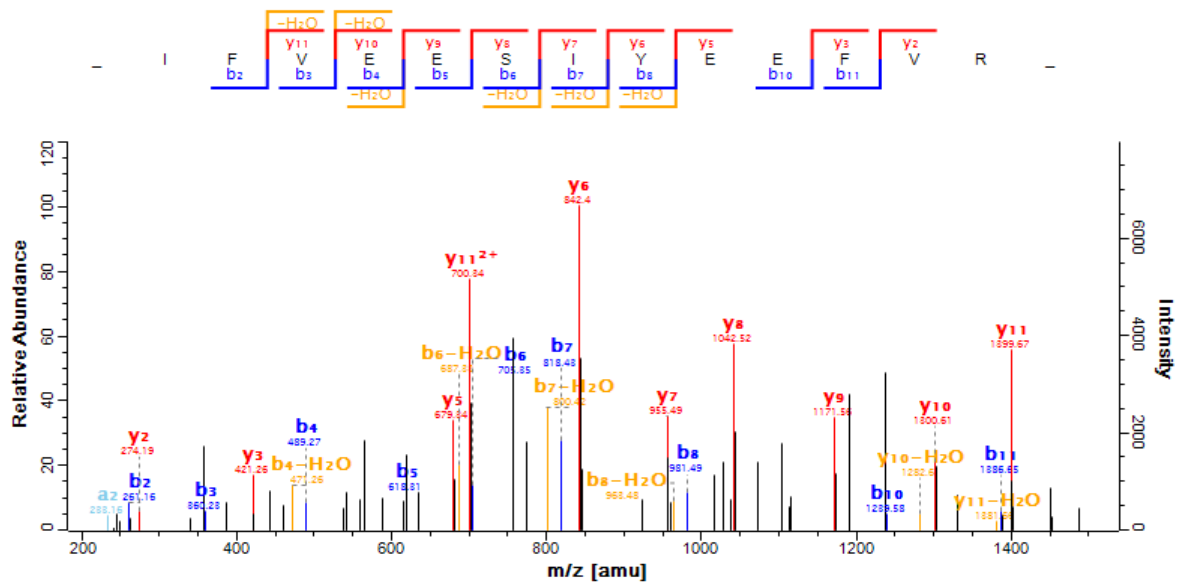

**Protein Group ID:** 1379  
**Protein Accession Numbers:** Q92610; H0YM74  
**Gene Names:** ZNF592  
**Peptide Sequence:** AAPLIVEVFNK  
**Total Number of Spectra:** 2  
**Number of Replicates (out of 8):** 2  
**Best Match Score:** 104.82  
**Best Match Posterior Error Probability:** 0.00034383  
**Best Match Spectrum:**

**Scan number** 62255      **Raw file** A549-US-WT-top20CID-Elite-2ug-B12  
**Method** ITMS; CID      **Genenames** ZNF592

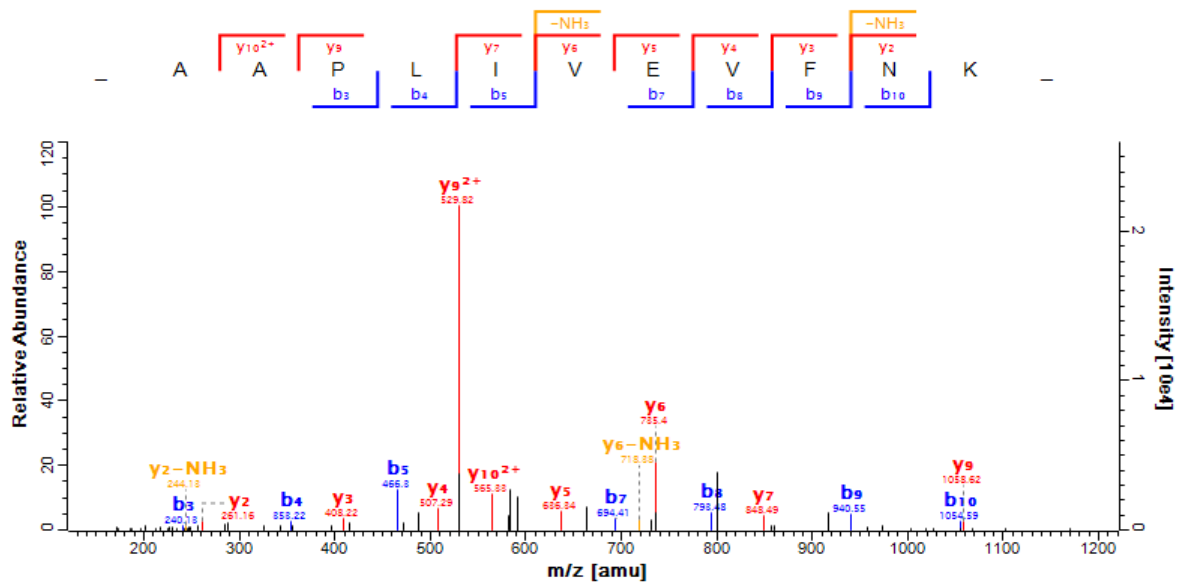

**Protein Group ID:** 1380  
**Protein Accession Numbers:** Q00978; H0YMB0  
**Gene Names:** IRF9  
**Peptide Sequence:** GILVASNP  
**Total Number of Spectra:** 2  
**Number of Replicates (out of 8):** 2  
**Best Match Score:** 128.36  
**Best Match Posterior Error Probability:** 0.00017413  
**Best Match Spectrum:**

**Scan number** 17763      **Raw file** A549-US-WT-top20CID-Elite-2ug-B11  
**Method** ITMS; CID      **Genenames** IRF9

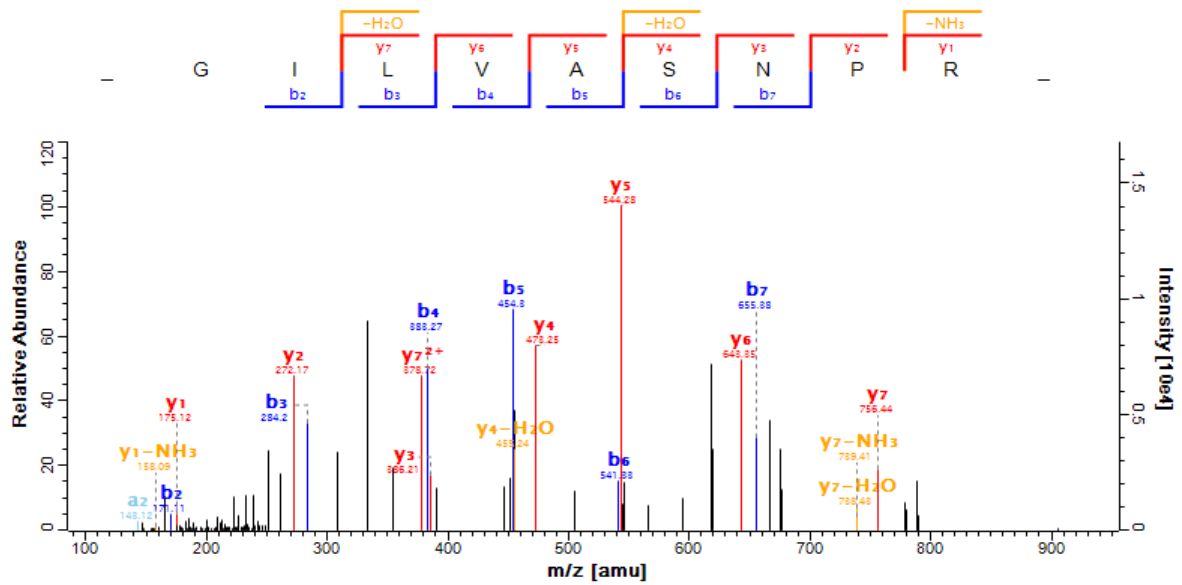

**Protein Group ID:** 1384  
**Protein Accession Numbers:** Q8TCT8; H0YNA7  
**Gene Names:** SPPL2A  
**Peptide Sequence:** ILIAFISYK  
**Total Number of Spectra:** 8  
**Number of Replicates (out of 8):** 8  
**Best Match Score:** 131.44  
**Best Match Posterior Error Probability:** 0.00010739  
**Best Match Spectrum:**

**Scan number** 62448      **Raw file** A549-US-Mock-top20CID-Elite-2ug-B11  
**Method** ITMS; CID      **Genenames** SPPL2A

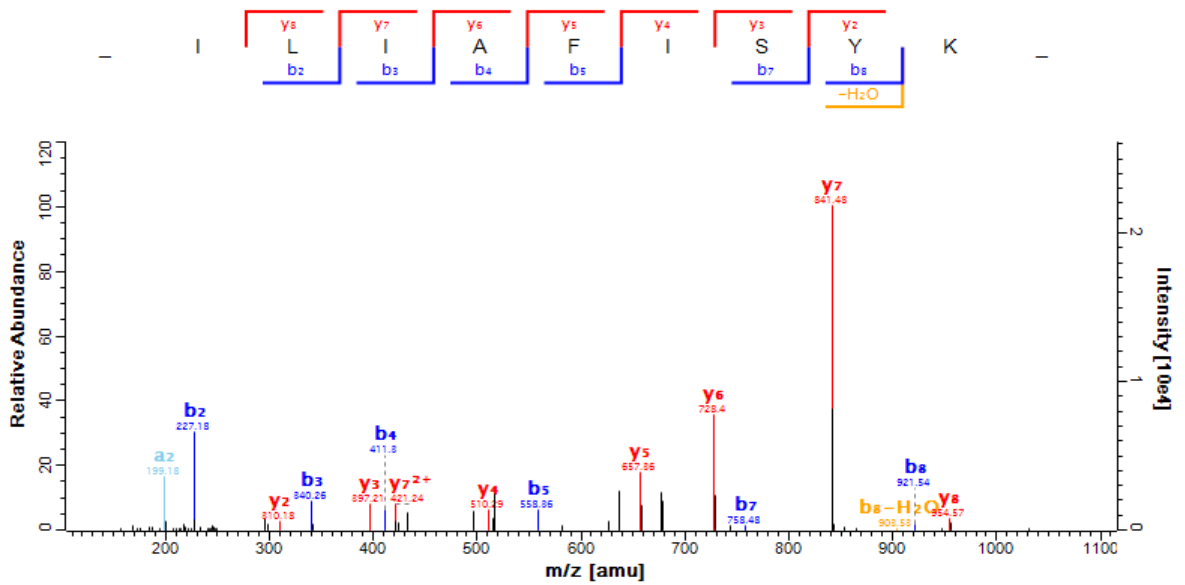

**Protein Group ID:** 1391

**Protein Accession Numbers:** Q9BV79; Q9BV79-2; H3BM30; Q5SYU3

**Gene Names:** MECR

**Peptide Sequence:** SLGAEHVITEELR

**Total Number of Spectra:** 1

**Number of Replicates (out of 8):** 1

**Best Match Score:** 84.468

**Best Match Posterior Error Probability:** 0.0021471

**Best Match Spectrum:**

|                    |           |                  |                                     |
|--------------------|-----------|------------------|-------------------------------------|
| <b>Scan number</b> | 34249     | <b>Raw file</b>  | A549-US-Mock-top20CID-Elite-2ug-B11 |
| <b>Method</b>      | ITMS; CID | <b>Genenames</b> | MECR                                |

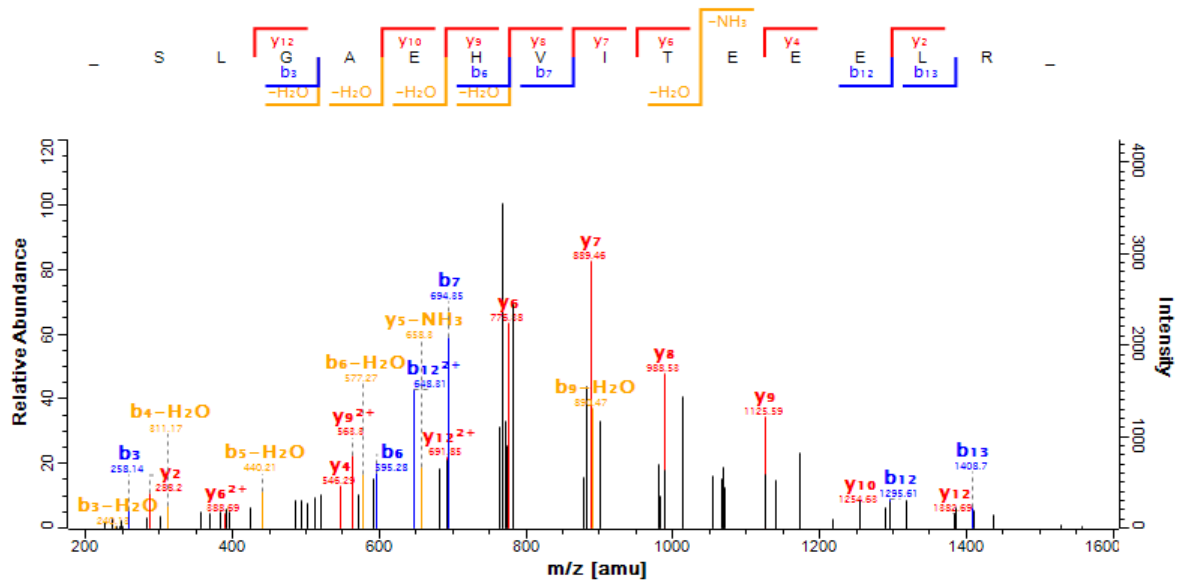



**Protein Group ID:** 1393

**Protein Accession Numbers:** Q9BVC4; H3BSZ4; Q9BVC4-4; H3BN58; H3BPT1; H3BR25; H3BPU5; H3BM50; H3BR38

**Gene Names:** MLST8

**Peptide Sequence:** TVQHQSQVNALEVT PDR

**Total Number of Spectra:** 3

**Number of Replicates (out of 8):** 2

**Best Match Score:** 138.46

**Best Match Posterior Error Probability:** 4.48E-11

**Best Match Spectrum:**

**Scan number** 24803      **Raw file** A549-US-WT-top20CID-Elite-2ug-B14  
**Method** ITMS: CID      **Genenames** MLST8

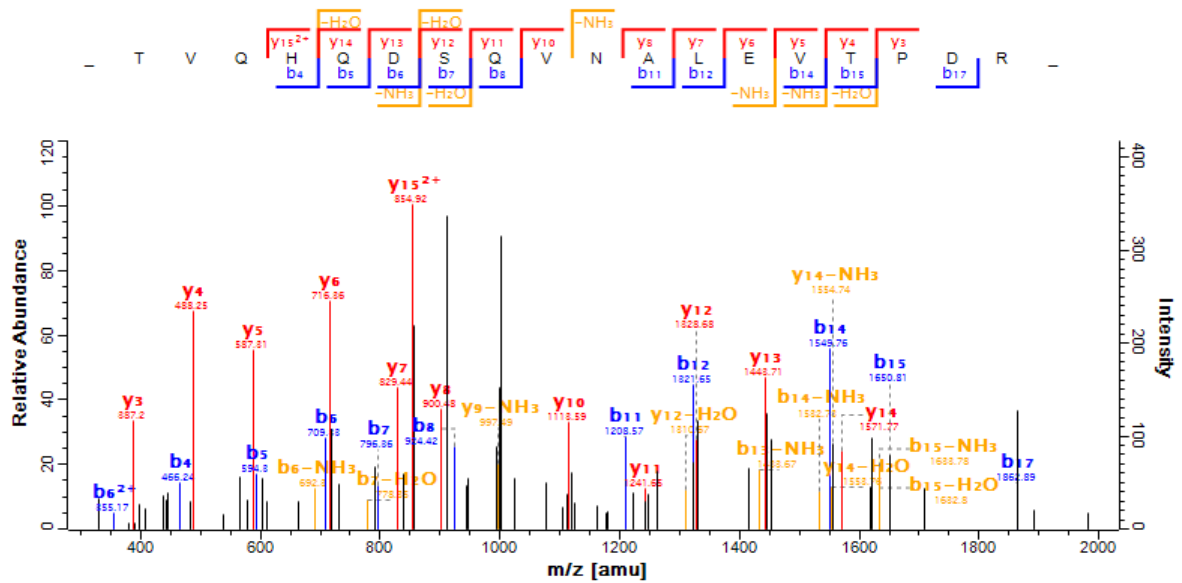

**Protein Group ID:** 1397

**Protein Accession Numbers:** Q9BTX3; H3BMW4; J3KRY7

**Gene Names:** TMEM208

**Peptide Sequence:** AAFSEDGALMDGGMDLNMEQGM AEHLK

**Total Number of Spectra:** 2

**Number of Replicates (out of 8):** 2

**Best Match Score:** 71.756

**Best Match Posterior Error Probability:** 0.00017176

**Best Match Spectrum:**

**Scan number** 67134      **Raw file** A549-US-Mock-top20CID-Elite-2ug-B12  
**Method** ITMS; CID      **Genenames** TMEM208

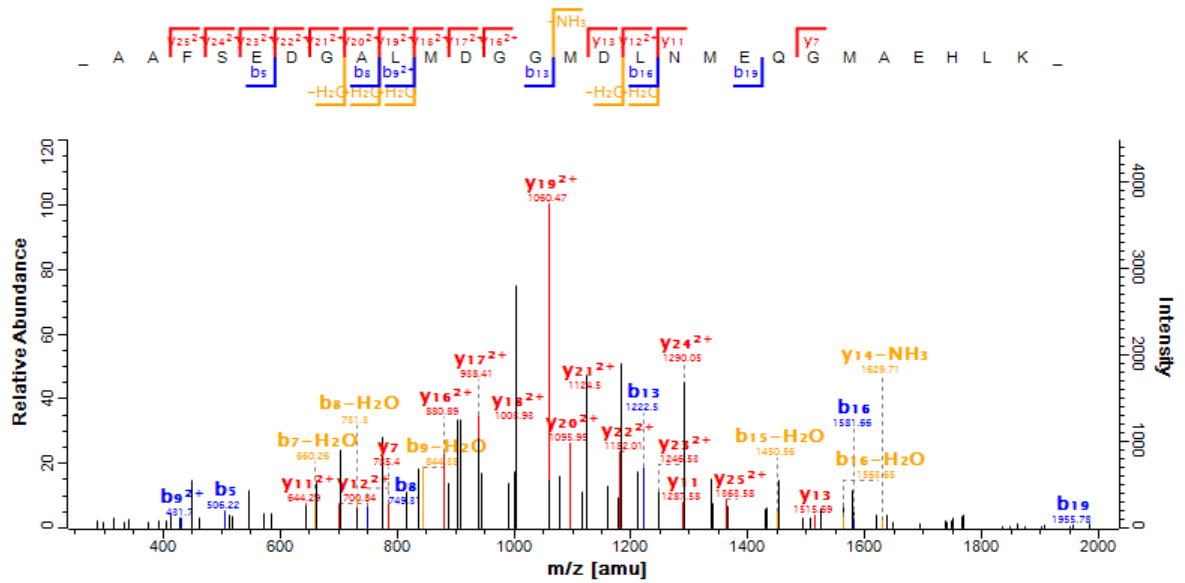

**Protein Group ID:** 1398

**Protein Accession Numbers:** H3BUT6; Q9NTJ4; H3BQY8; H3BMX2

**Gene Names:** MAN2C1

**Peptide Sequence:** QFLQGQNFFLQEFQK

**Total Number of Spectra:** 2

**Number of Replicates (out of 8):** 2

**Best Match Score:** 85.006

**Best Match Posterior Error Probability:** 0.0015016

**Best Match Spectrum:**

|                    |           |                  |                                     |
|--------------------|-----------|------------------|-------------------------------------|
| <b>Scan number</b> | 74936     | <b>Raw file</b>  | A549-US-Mock-top20CID-Elite-2ug-B11 |
| <b>Method</b>      | ITMS; CID | <b>Genenames</b> | MAN2C1                              |

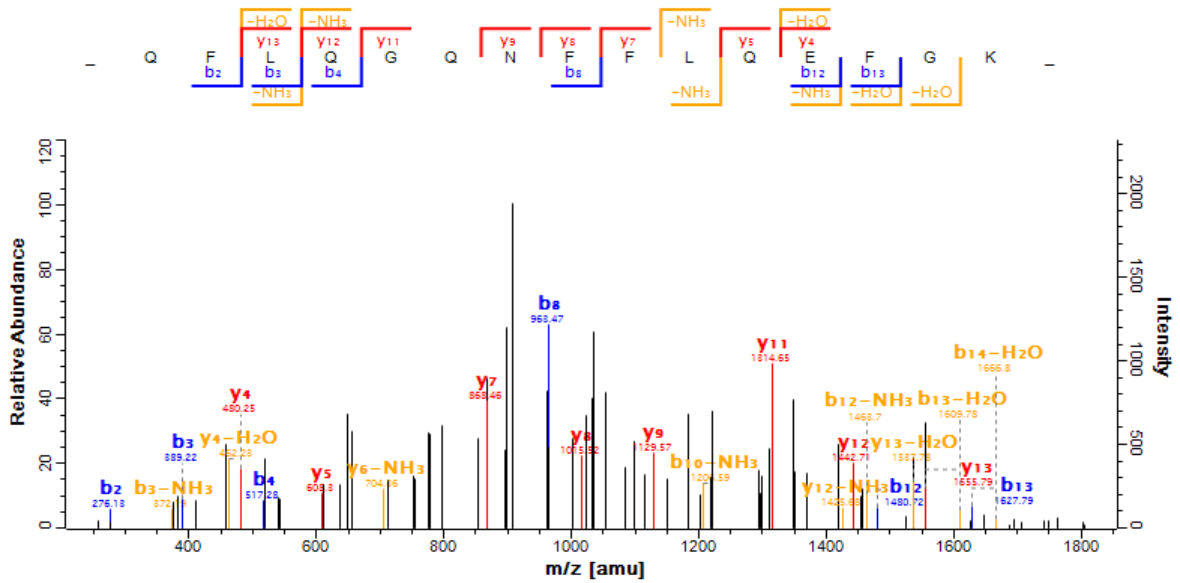

**Protein Group ID:** 1399

**Protein Accession Numbers:** Q9GZU8; H3BU93; H3BMX9; H3BUL4; H3BP64; H3BSY6; H3BTP8; H3BTI2; H3BQQ6

**Gene Names:** FAM192A

**Peptide Sequence:** GLDEDETNFLDEVSR

**Total Number of Spectra:** 8

**Number of Replicates (out of 8):** 7

**Best Match Score:** 266.15

**Best Match Posterior Error Probability:** 3.73E-105

**Best Match Spectrum:**

**Scan number** 57927      **Raw file** A549-US-Mock-top20CID-Elite-2ug-B13  
**Method** ITMS: CID      **Genenames** FAM192A

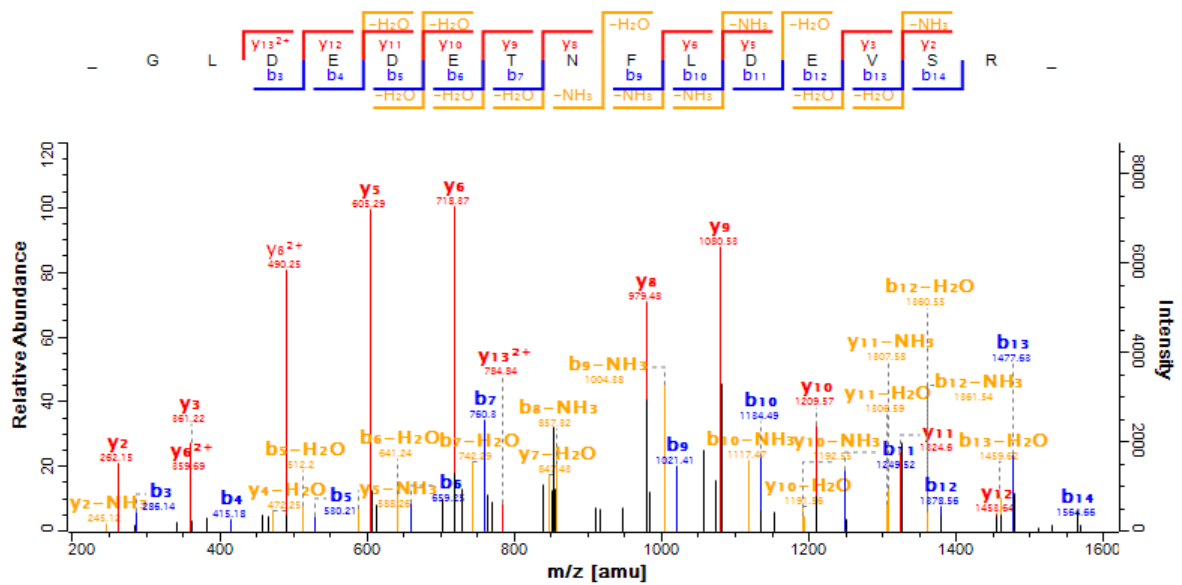

**Protein Group ID:** 1401

**Protein Accession Numbers:** Q9NVM4; Q9NVM4-3; H3BNC0; Q9NVM4-4; H3BPZ8; H3BSS9

**Gene Names:** PRMT7

**Peptide Sequence:** ANILVTELFDTLELILIGEGALPSYEHAHR

**Total Number of Spectra:** 1

**Number of Replicates (out of 8):** 1

**Best Match Score:** 63.398

**Best Match Posterior Error Probability:** 0.00041501

**Best Match Spectrum:**

|                    |           |                  |                                   |
|--------------------|-----------|------------------|-----------------------------------|
| <b>Scan number</b> | 88728     | <b>Raw file</b>  | A549-US-WT-top20CID-Elite-2ug-B11 |
| <b>Method</b>      | ITMS; CID | <b>Genenames</b> | PRMT7                             |

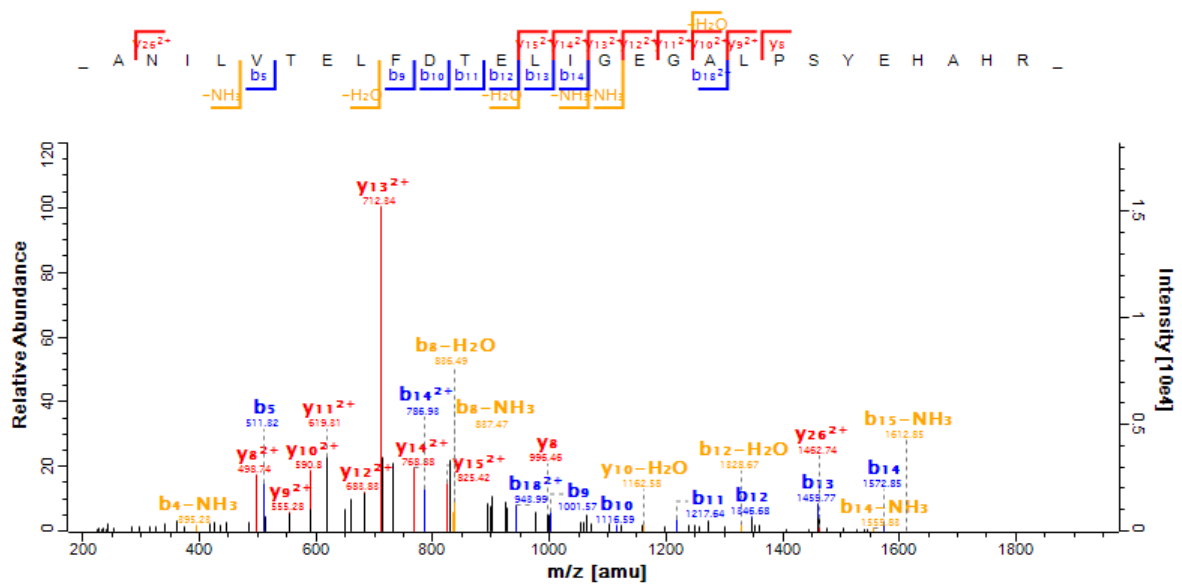

**Protein Group ID:** 1403

**Protein Accession Numbers:** Q9NWW5; H3BUT1; H3BUV4; H3BTY4; H3BNF1; H3BRN7

**Gene Names:** CLN6

**Peptide Sequence:** QHLGATGGPGAQLGASFLQAR

**Total Number of Spectra:** 6

**Number of Replicates (out of 8):** 6

**Best Match Score:** 87.49

**Best Match Posterior Error Probability:** 0.00010132

**Best Match Spectrum:**

**Scan number** 48202      **Raw file** A549-US-Mock-top20CID-Elite-2ug-B13  
**Method** ITMS; CID      **Genenames** CLN6

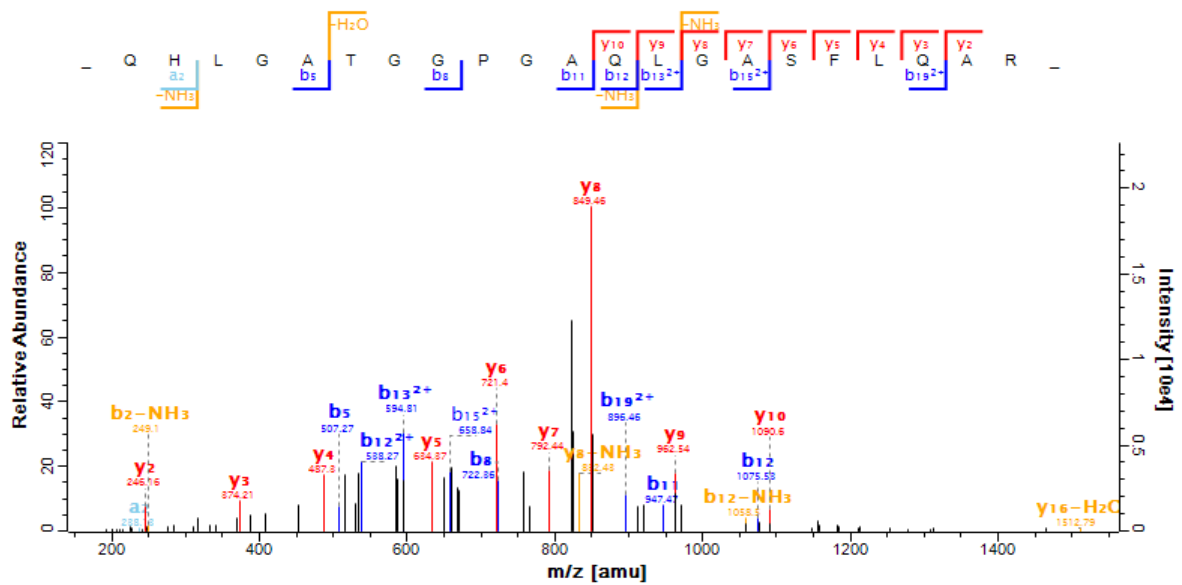



**Protein Group ID:** 1409

**Protein Accession Numbers:** Q8TBB5; Q8TBB5-3; H3BQ90; H3BQL0; H3BP99

**Gene Names:** KLHDC4

**Peptide Sequence:** KEEEDLEALIAHFQTLDAK

**Total Number of Spectra:** 7

**Number of Replicates (out of 8):** 4

**Best Match Score:** 149.97

**Best Match Posterior Error Probability:** 2.75E-07

**Best Match Spectrum:**

**Scan number** 74241      **Raw file** A549-US-Mock-top20CID-Elite-2ug-B12  
**Method** ITMS; CID      **Genenames** KLHDC4

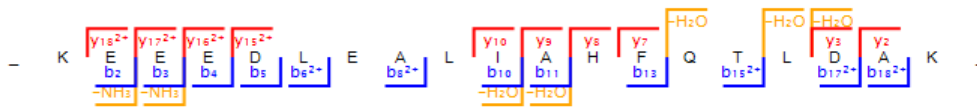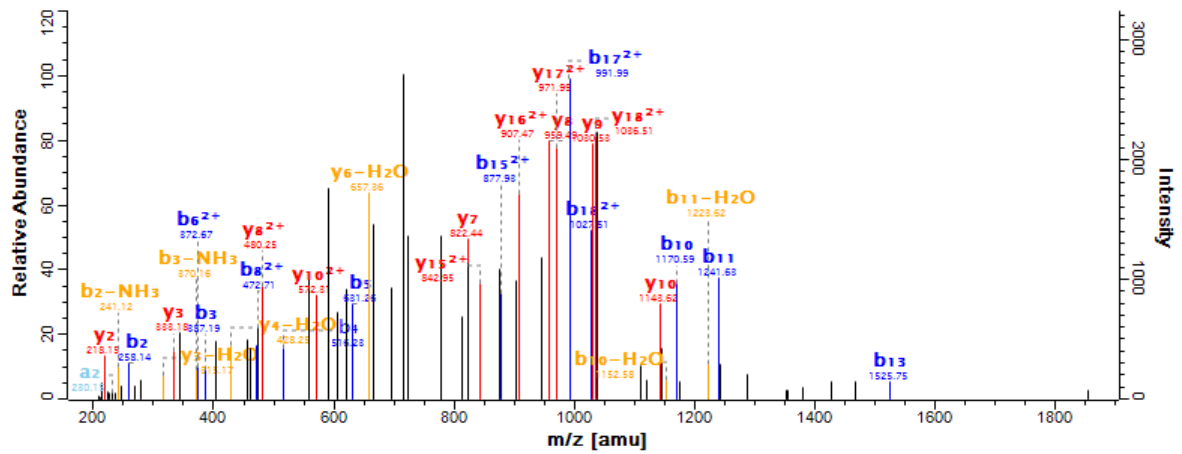



**Protein Group ID:** 1414

**Protein Accession Numbers:** Q96CD2; H3BRQ0; H3BQB0; H3BSE3; Q96CD2-2; H3BU63; H3BPW5

**Gene Names:** PPCDC

**Peptide Sequence:** PLLFCPAMNTAMWEHPITAAQQVDQLK

**Total Number of Spectra:** 1

**Number of Replicates (out of 8):** 1

**Best Match Score:** 55.228

**Best Match Posterior Error Probability:** 0.0022872

**Best Match Spectrum:**

|                    |           |                  |                                     |
|--------------------|-----------|------------------|-------------------------------------|
| <b>Scan number</b> | 78528     | <b>Raw file</b>  | A549-US-Mock-top20CID-Elite-2ug-B13 |
| <b>Method</b>      | ITMS: CID | <b>Genenames</b> | PPCDC                               |

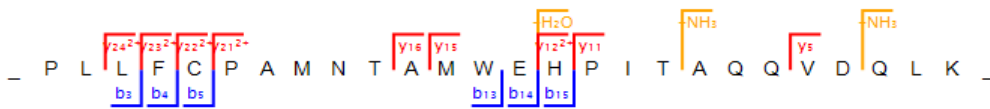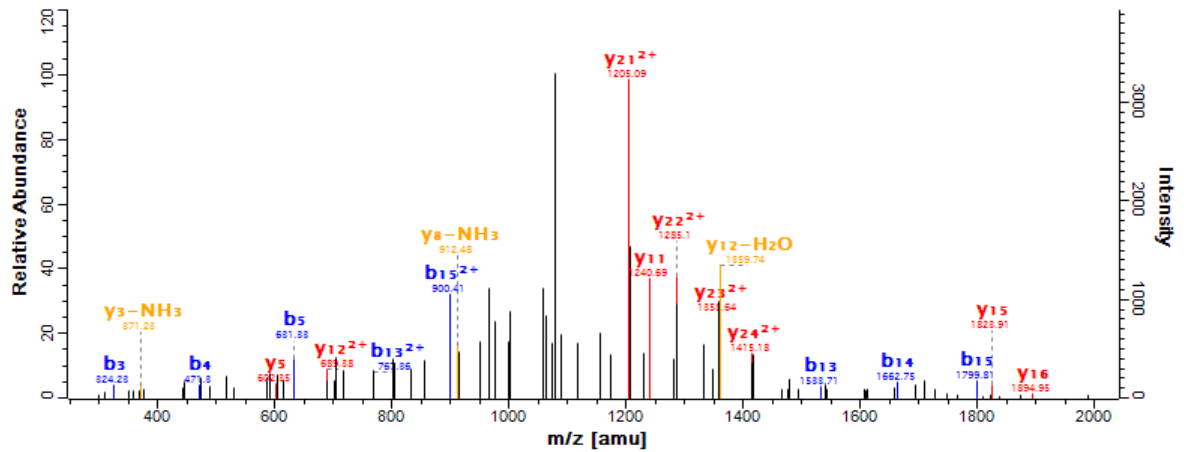

**Protein Group ID:** 1419  
**Protein Accession Numbers:** P27449; H3BR50  
**Gene Names:** ATP6V0C  
**Peptide Sequence:** SGTGIAAMSVMRP EQIMK  
**Total Number of Spectra:** 3  
**Number of Replicates (out of 8):** 2  
**Best Match Score:** 110.77  
**Best Match Posterior Error Probability:** 0.00025064  
**Best Match Spectrum:**

**Scan number** 52855      **Raw file** A549-US-WT-top20CID-Elite-2ug-B11  
**Method** ITMS; CID      **Genenames** ATP6V0C

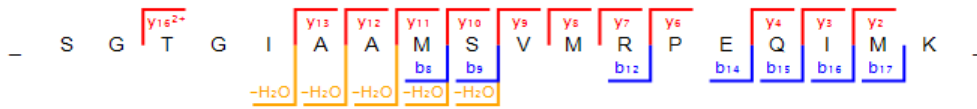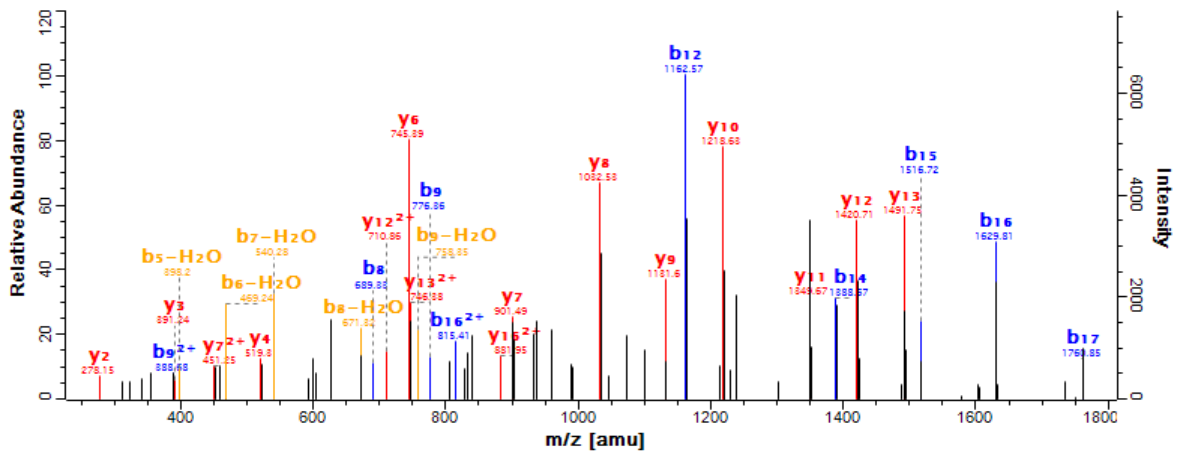

**Protein Group ID:** 1427  
**Protein Accession Numbers:** H3BSS5; Q9NXV2  
**Gene Names:** KCTD5  
**Peptide Sequence:** AENHCELLSPAR  
**Total Number of Spectra:** 4  
**Number of Replicates (out of 8):** 4  
**Best Match Score:** 120.84  
**Best Match Posterior Error Probability:** 0.00017059  
**Best Match Spectrum:**

**Scan number** 26713      **Raw file** A549-US-Mock-top20CID-Elite-2ug-B13  
**Method** ITMS; CID      **Genenames** KCTD5

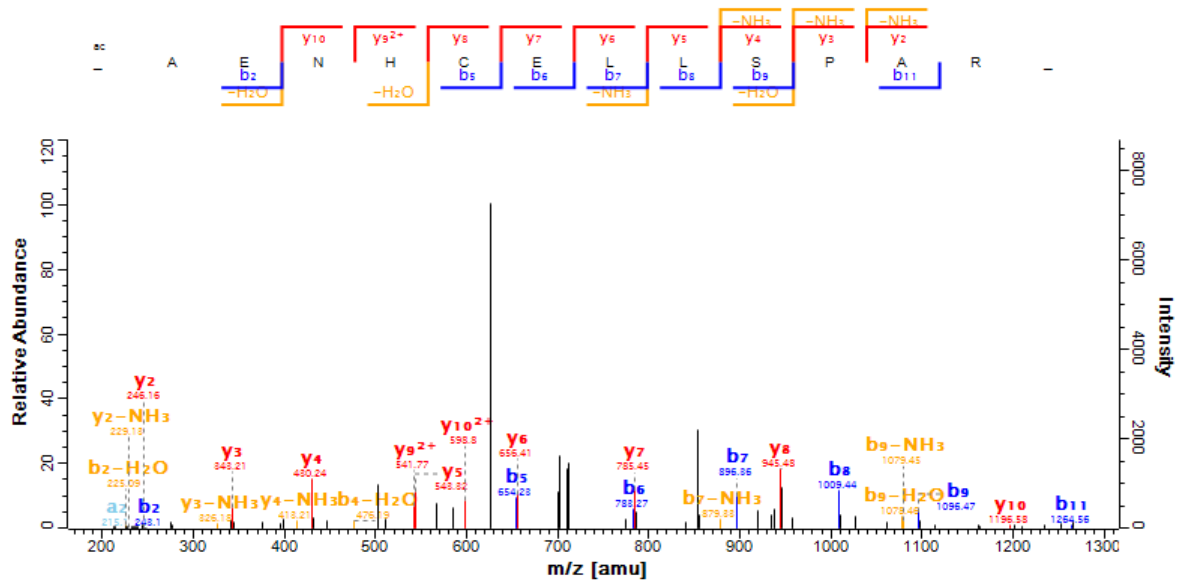

**Protein Group ID:** 1428

**Protein Accession Numbers:** H3BSW6; Q2VPK5; Q2VPK5-5; Q2VPK5-3

**Gene Names:** CTU2

**Peptide Sequence:** LFSVPSVFTPAVDTK

**Total Number of Spectra:** 1

**Number of Replicates (out of 8):** 1

**Best Match Score:** 113.25

**Best Match Posterior Error Probability:** 0.00010472

**Best Match Spectrum:**

|                    |           |                  |                                     |
|--------------------|-----------|------------------|-------------------------------------|
| <b>Scan number</b> | 67188     | <b>Raw file</b>  | A549-US-Mock-top20CID-Elite-2ug-B11 |
| <b>Method</b>      | ITMS; CID | <b>Genenames</b> | CTU2                                |

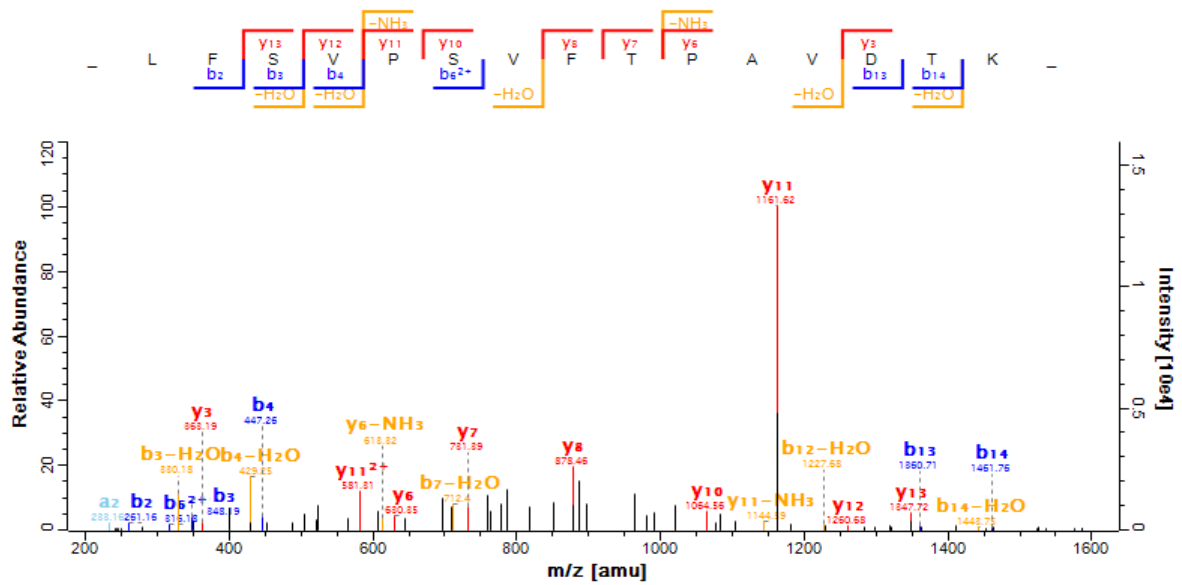

**Protein Group ID:** 1429  
**Protein Accession Numbers:** Q9Y5N6; H3BT22  
**Gene Names:** ORC6  
**Peptide Sequence:** ILENAASAQK  
**Total Number of Spectra:** 4  
**Number of Replicates (out of 8):** 4  
**Best Match Score:** 106.4  
**Best Match Posterior Error Probability:** 0.00050108  
**Best Match Spectrum:**

**Scan number** 6847      **Raw file** A549-US-WT-top20CID-Elite-2ug-B11  
**Method** ITMS; CID      **Genenames** ORC6

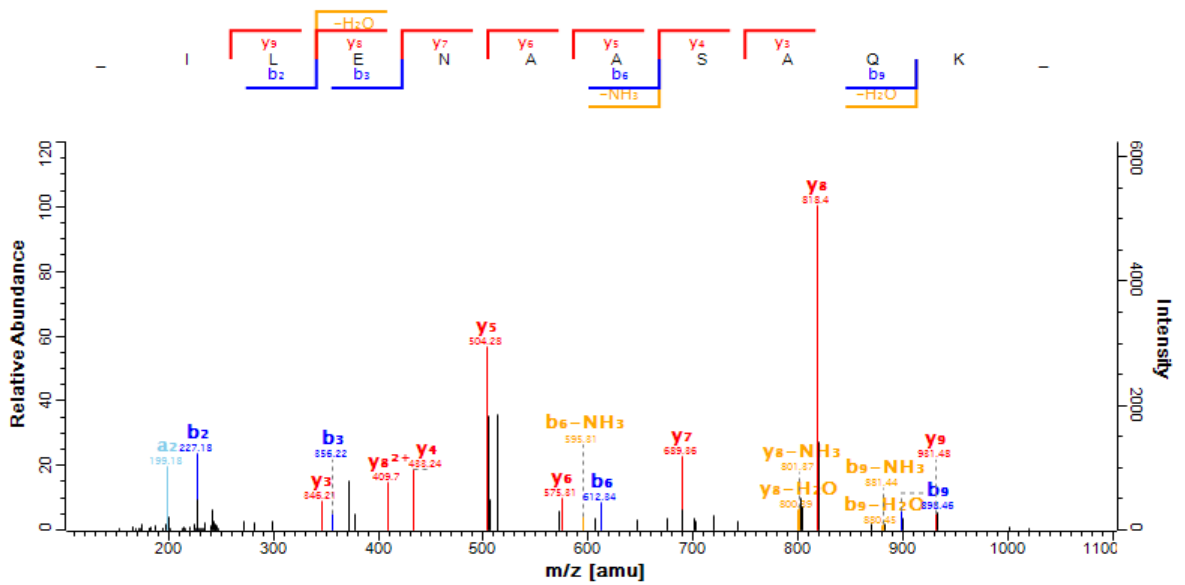



**Protein Group ID:** 1432

**Protein Accession Numbers:** Q9NXD2; Q9NXD2-3; H3BUS9

**Gene Names:** MTMR10

**Peptide Sequence:** KLEPVLLPGEIVVNEVNFVR

**Total Number of Spectra:** 3

**Number of Replicates (out of 8):** 3

**Best Match Score:** 87.24

**Best Match Posterior Error Probability:** 0.00045104

**Best Match Spectrum:**

|                    |           |                  |                                   |
|--------------------|-----------|------------------|-----------------------------------|
| <b>Scan number</b> | 83854     | <b>Raw file</b>  | A549-US-WT-top20CID-Elite-2ug-B11 |
| <b>Method</b>      | ITMS; CID | <b>Genenames</b> | MTMR10                            |

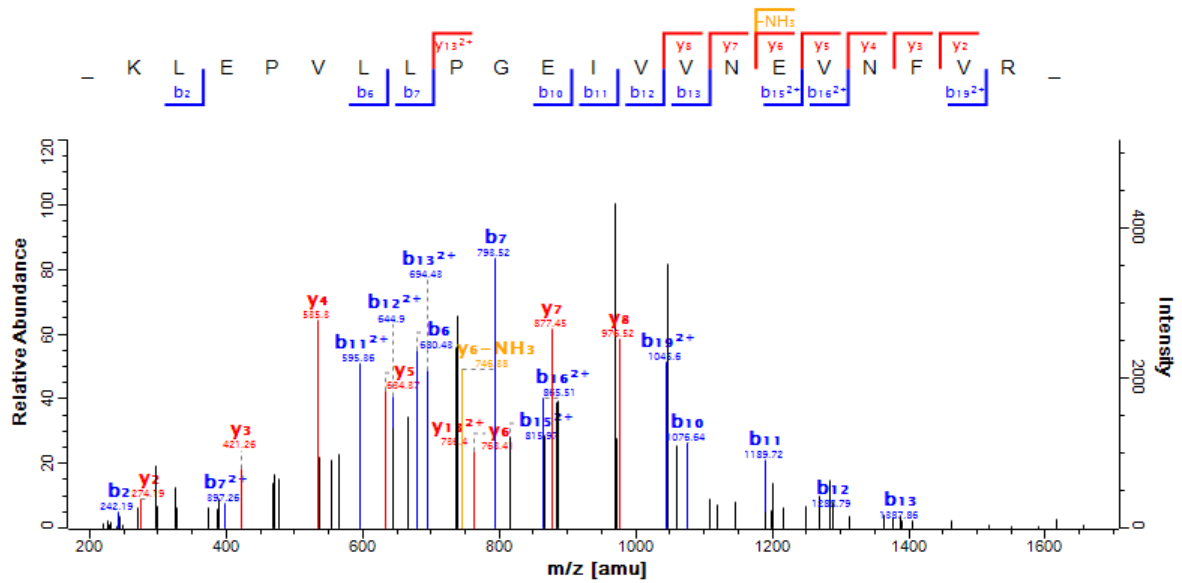

**Protein Group ID:** 1433

**Protein Accession Numbers:** Q8WV22; I3L1I3; H3BV05

**Gene Names:** NSMCE1

**Peptide Sequence:** AILEMEQYIR

**Total Number of Spectra:** 4

**Number of Replicates (out of 8):** 3

**Best Match Score:** 90.685

**Best Match Posterior Error Probability:** 0.0018902

**Best Match Spectrum:**

|                    |           |                  |                                     |
|--------------------|-----------|------------------|-------------------------------------|
| <b>Scan number</b> | 53776     | <b>Raw file</b>  | A549-US-Mock-top20CID-Elite-2ug-B13 |
| <b>Method</b>      | ITMS; CID | <b>Genenames</b> | NSMCE1                              |

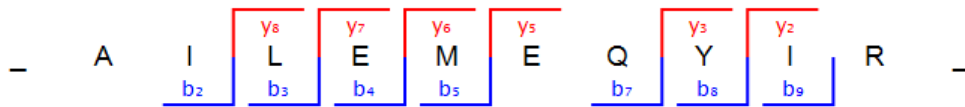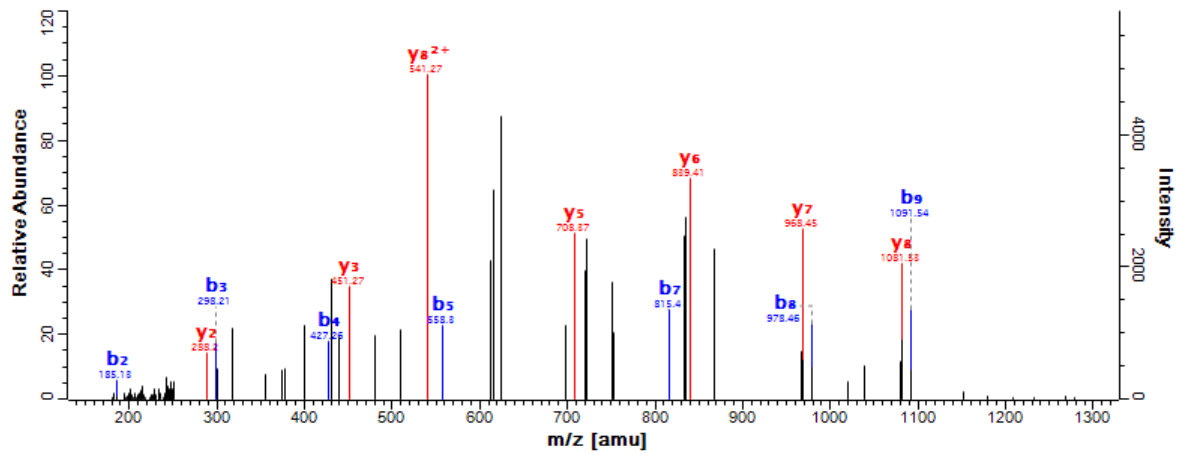



**Protein Group ID:** 1439

**Protein Accession Numbers:** P39060; P39060-1; P39060-2; H7BXV5; H7C457

**Gene Names:** COL18A1

**Peptide Sequence:** DFQPVLHLVALNSPLSGGMR

**Total Number of Spectra:** 6

**Number of Replicates (out of 8):** 5

**Best Match Score:** 128.59

**Best Match Posterior Error Probability:** 2.18E-06

**Best Match Spectrum:**

**Scan number** 78108      **Raw file** A549-US-Mock-top20CID-Elite-2ug-B13  
**Method** ITMS; CID      **Genenames** COL18A1

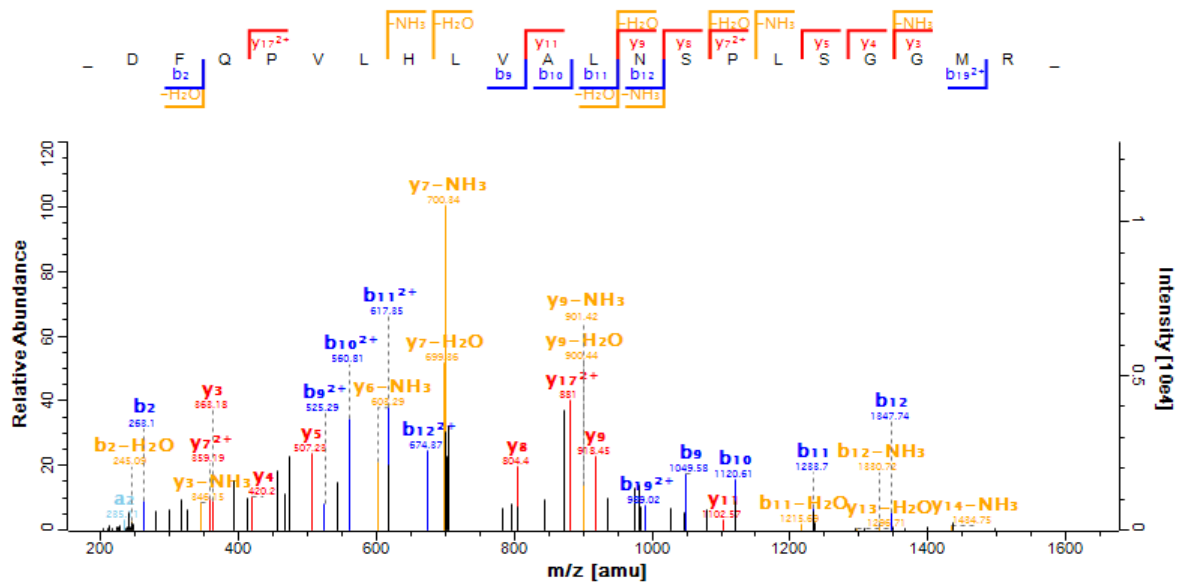

**Protein Group ID:** 1442

**Protein Accession Numbers:** Q8IXI2-3; J9JIH9; Q8IXI2-2; Q8IXI2-5; Q8IXI2; H7BXZ6; Q8IXI2-4; J3KXS7

**Gene Names:** RHOT1

**Peptide Sequence:** ICFNTPLAPQALEDVK

**Total Number of Spectra:** 2

**Number of Replicates (out of 8):** 2

**Best Match Score:** 144.29

**Best Match Posterior Error Probability:** 6.07E-06

**Best Match Spectrum:**

**Scan number** 63765      **Raw file** A549-US-WT-top20CID-Elite-2ug-B12  
**Method** ITMS: CID      **Genenames** RHOT1

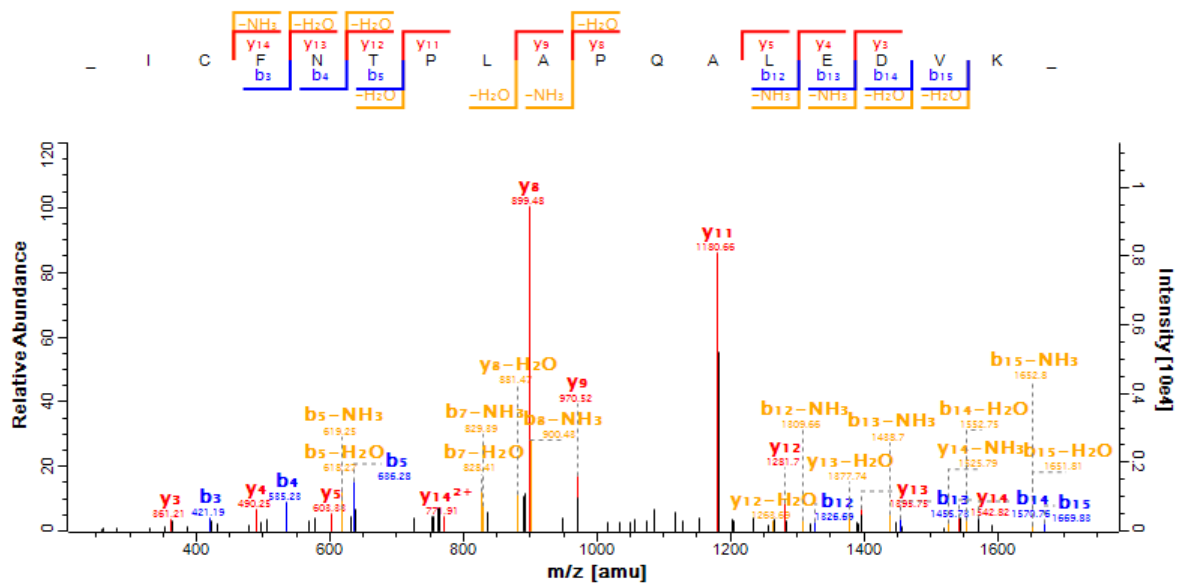

**Protein Group ID:** 1450  
**Protein Accession Numbers:** H7BZ55; H7BZ68  
**Gene Names:**  
**Peptide Sequence:** EALAQLQREK  
**Total Number of Spectra:** 1  
**Number of Replicates (out of 8):** 1  
**Best Match Score:** 218.6  
**Best Match Posterior Error Probability:** 4.38E-25  
**Best Match Spectrum:**

**Scan number** 18373      **Raw file** A549-US-WT-top20CID-Elite-2ug-B12  
**Method** ITMS; CID      **Pepti...** 218.6

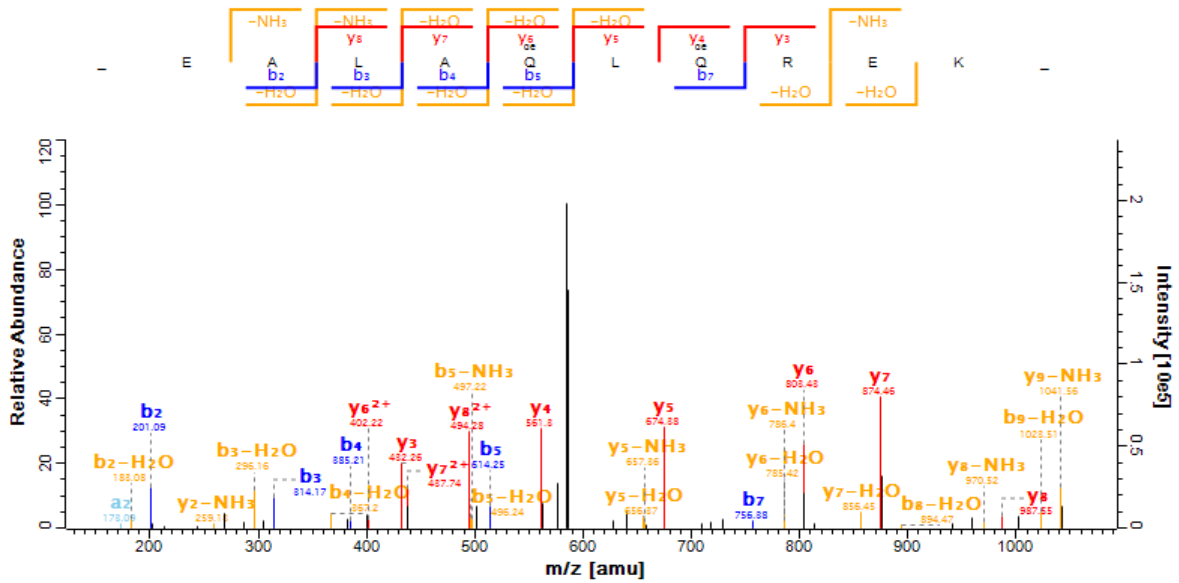

**Protein Group ID:** 1454

**Protein Accession Numbers:** J3KN59; Q12982-2; Q12982; H7C096

**Gene Names:** BNIP2

**Peptide Sequence:** MP<sup>SL</sup>GWLR

**Total Number of Spectra:** 5

**Number of Replicates (out of 8):** 5

**Best Match Score:** 122.13

**Best Match Posterior Error Probability:** 0.0018606

**Best Match Spectrum:**

**Scan number** 57314      **Raw file** A549-US-Mock-top20CID-Elite-2ug-B12  
**Method** ITMS; CID      **Genenames** BNIP2

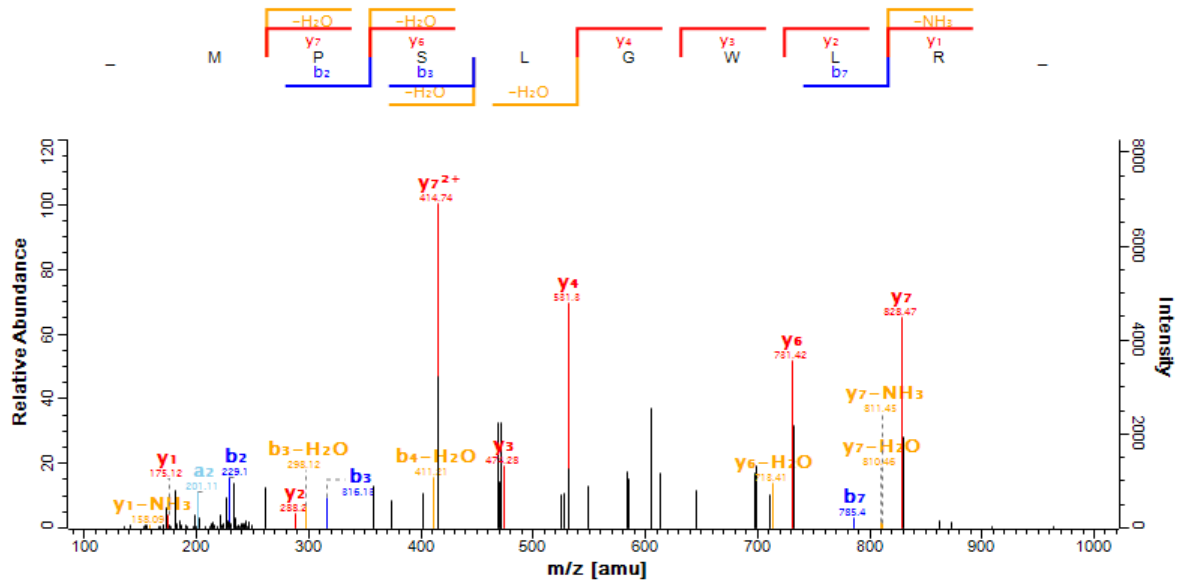

**Protein Group ID:** 1455  
**Protein Accession Numbers:** P20749; H7C0A2  
**Gene Names:** BCL3  
**Peptide Sequence:** LLVTAGASPMALDR  
**Total Number of Spectra:** 1  
**Number of Replicates (out of 8):** 1  
**Best Match Score:** 77.894  
**Best Match Posterior Error Probability:** 0.0037663  
**Best Match Spectrum:**

**Scan number** 47929      **Raw file** A549-US-WT-top20CID-Elite-2ug-B11  
**Method** ITMS; CID      **Genenames** BCL3

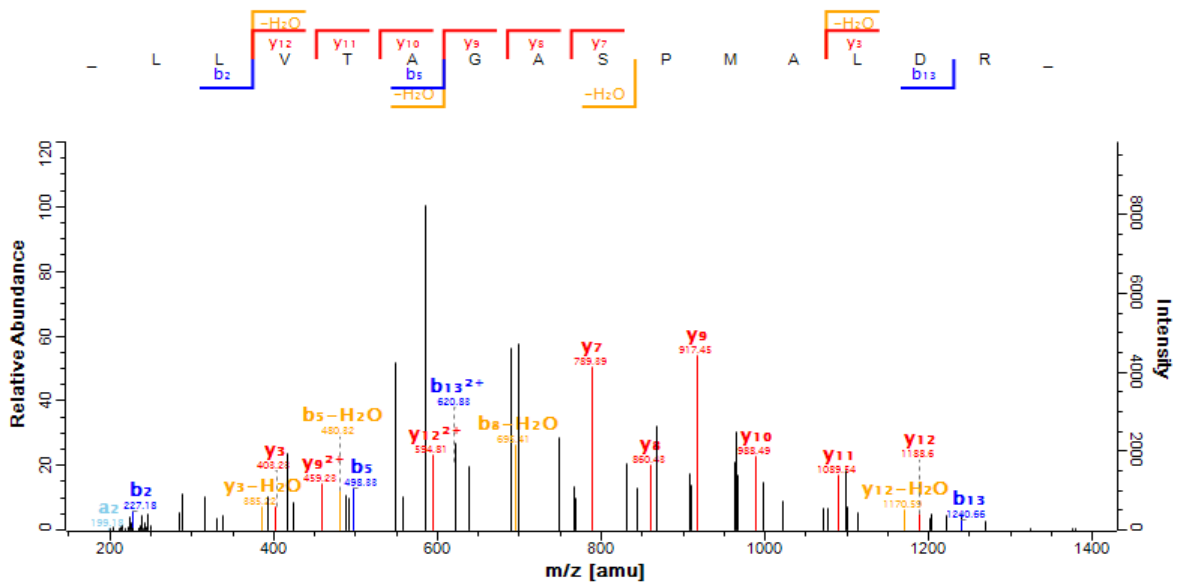

**Protein Group ID:** 1457

**Protein Accession Numbers:** Q9H330; Q9H330-2; H7C0G1; Q9H330-3

**Gene Names:** TMEM245

**Peptide Sequence:** ALNSAANNVYQYGR

**Total Number of Spectra:** 1

**Number of Replicates (out of 8):** 1

**Best Match Score:** 220.21

**Best Match Posterior Error Probability:** 1.05E-41

**Best Match Spectrum:**

**Scan number** 28342      **Raw file** A549-US-WT-top20CID-Elite-2ug-B12  
**Method** ITMS; CID      **Genenames** TMEM245

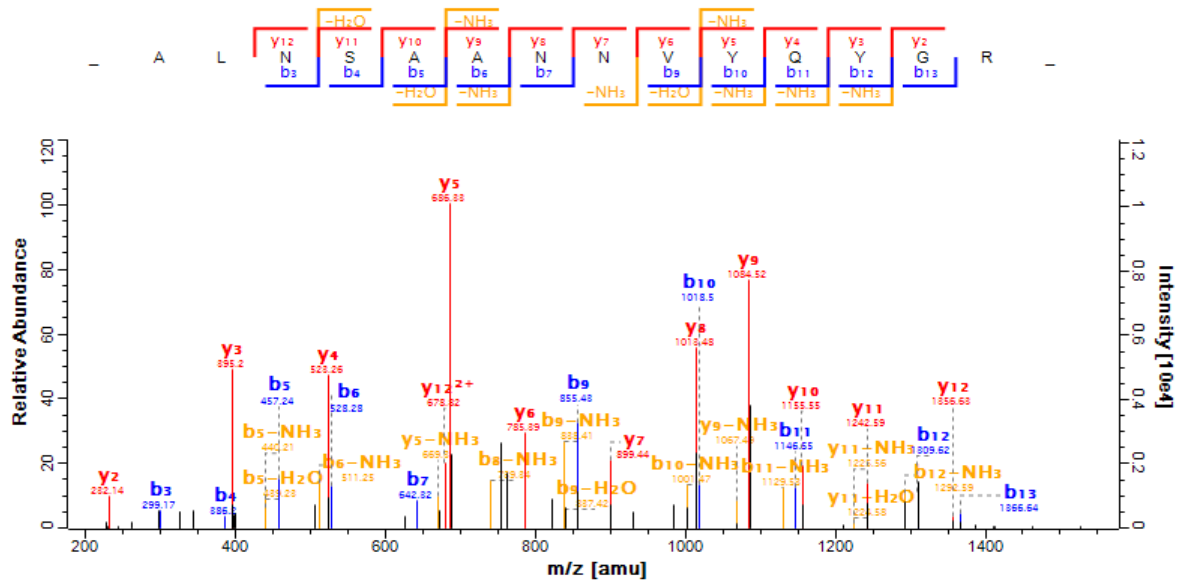

**Protein Group ID:** 1459

**Protein Accession Numbers:** Q9Y6W3; H7C1B7

**Gene Names:** CAPN7

**Peptide Sequence:** VMGGYDFPGSNSNSNIDLHALTGWIPER

**Total Number of Spectra:** 2

**Number of Replicates (out of 8):** 2

**Best Match Score:** 68.552

**Best Match Posterior Error Probability:** 0.0003327

**Best Match Spectrum:**

**Scan number** 82085      **Raw file** A549-US-WT-top20CID-Elite-2ug-B13  
**Method** ITMS; CID      **Genenames** CAPN7

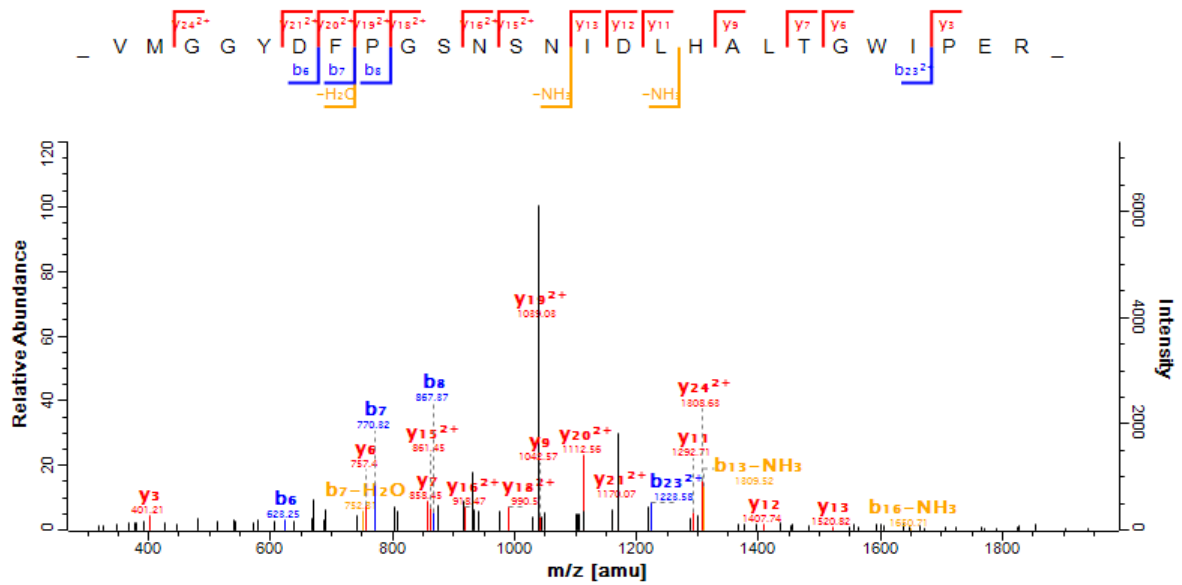

**Protein Group ID:** 1462

**Protein Accession Numbers:** Q5VZL5; Q5VZL5-4; Q5VZL5-2; Q5VZL5-3; H7C1I7

**Gene Names:** ZMYM4

**Peptide Sequence:** IIGDASTQTDALK

**Total Number of Spectra:** 2

**Number of Replicates (out of 8):** 2

**Best Match Score:** 82.85

**Best Match Posterior Error Probability:** 0.0026669

**Best Match Spectrum:**

**Scan number** 23204      **Raw file** A549-US-Mock-top20CID-Elite-2ug-B14  
**Method** ITMS; CID      **Genenames** ZMYM4

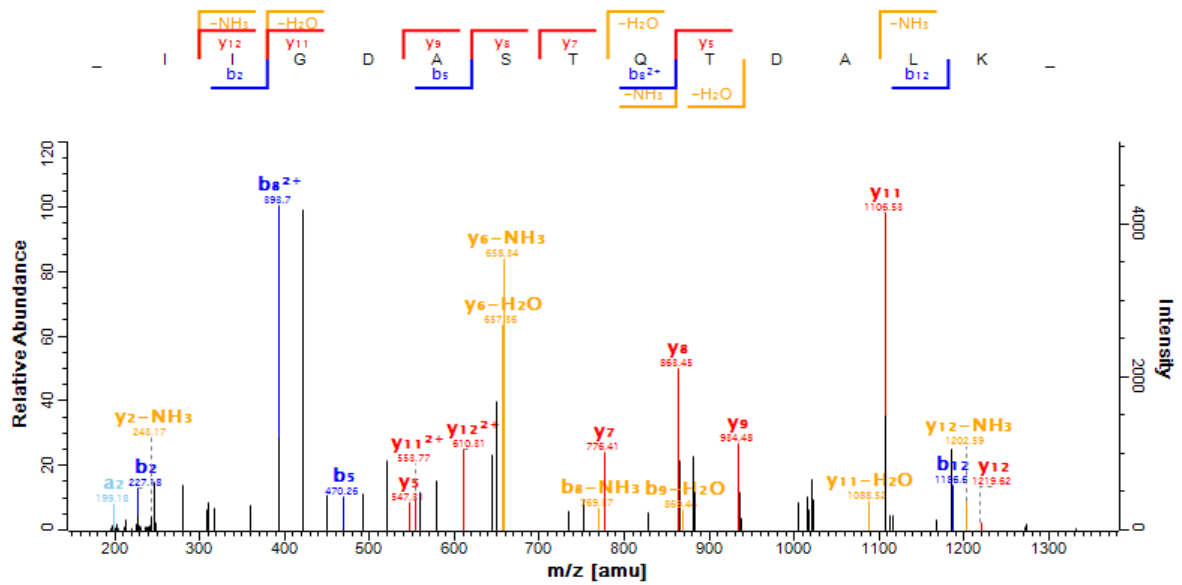



**Protein Group ID:** 1463

**Protein Accession Numbers:** Q9H147; H7C1M5; H7C1J2

**Gene Names:** DNTTIP1

**Peptide Sequence:** SFVLPSWMVEK

**Total Number of Spectra:** 2

**Number of Replicates (out of 8):** 2

**Best Match Score:** 94.465

**Best Match Posterior Error Probability:** 0.0010138

**Best Match Spectrum:**

**Scan number** 68810      **Raw file** A549-US-Mock-top20CID-Elite-2ug-B13  
**Method** ITMS; CID      **Genenames** DNTTIP1

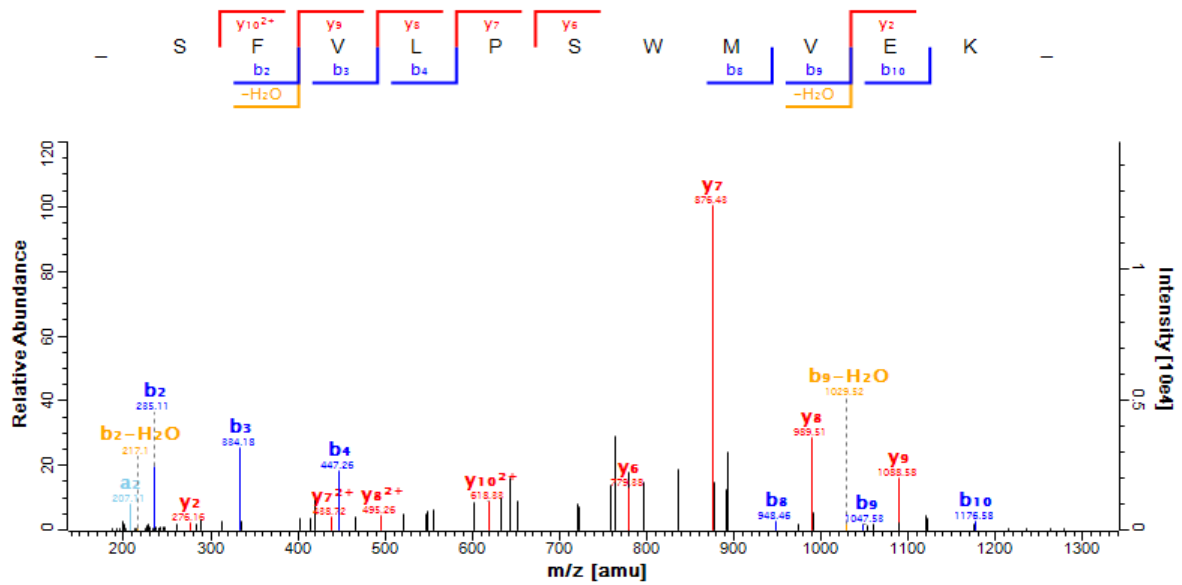

**Protein Group ID:** 1464  
**Protein Accession Numbers:** H7C1N3; O15155  
**Gene Names:** BET1  
**Peptide Sequence:** LLAEMDSQFDSTTGFLGK  
**Total Number of Spectra:** 1  
**Number of Replicates (out of 8):** 1  
**Best Match Score:** 101.53  
**Best Match Posterior Error Probability:** 0.00015183  
**Best Match Spectrum:**

**Scan number** 64822      **Raw file** A549-US-Mock-top20CID-Elite-2ug-B13  
**Method** ITMS; CID      **Genenames** BET1

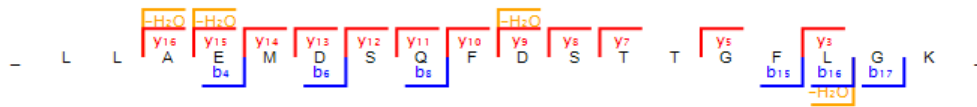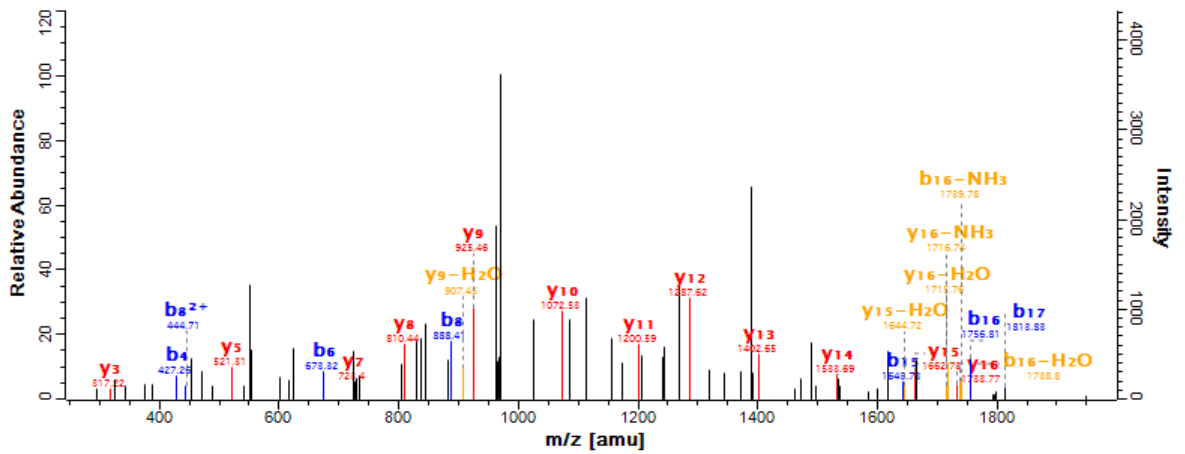

**Protein Group ID:** 1468  
**Protein Accession Numbers:** O95858; H7C285  
**Gene Names:** TSPAN15  
**Peptide Sequence:** GIENYYDDLDFK  
**Total Number of Spectra:** 4  
**Number of Replicates (out of 8):** 3  
**Best Match Score:** 101.32  
**Best Match Posterior Error Probability:** 0.00047971  
**Best Match Spectrum:**

**Scan number** 56188      **Raw file** A549-US-Mock-top20CID-Elite-2ug-B13  
**Method** ITMS; CID      **Genenames** TSPAN15

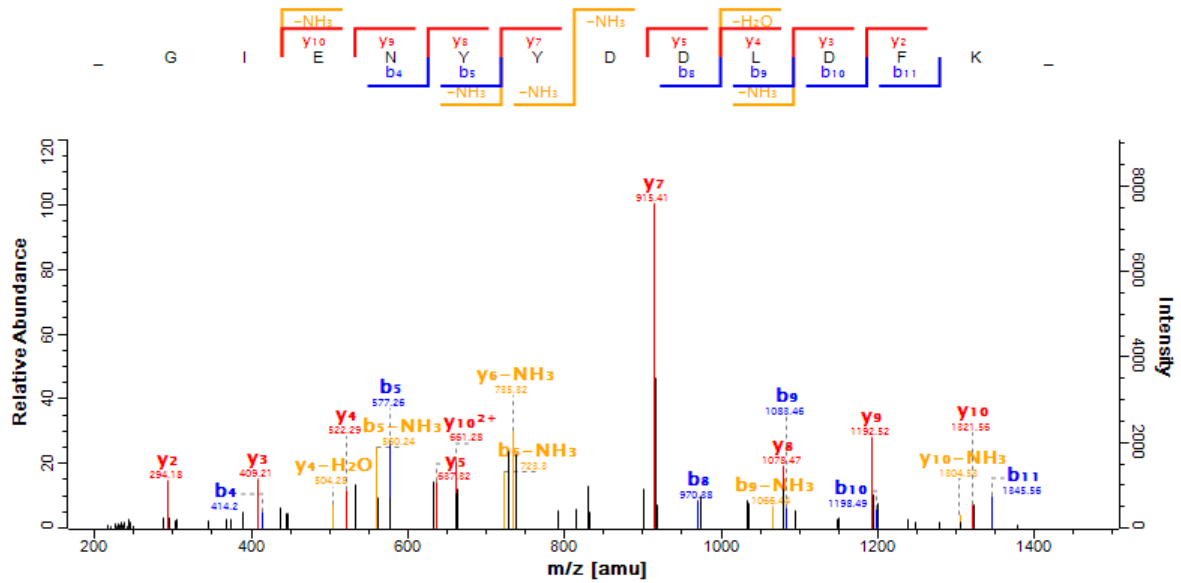

**Protein Group ID:** 1471  
**Protein Accession Numbers:** H7C2S4  
**Gene Names:** CTDSPL  
**Peptide Sequence:** DLDETLVHSSFK  
**Total Number of Spectra:** 2  
**Number of Replicates (out of 8):** 2  
**Best Match Score:** 96.113  
**Best Match Posterior Error Probability:** 0.00081657  
**Best Match Spectrum:**

**Scan number** 33160      **Raw file** A549-US-Mock-top20CID-Elite-2ug-B13  
**Method** ITMS; CID      **Genenames** CTDSPL

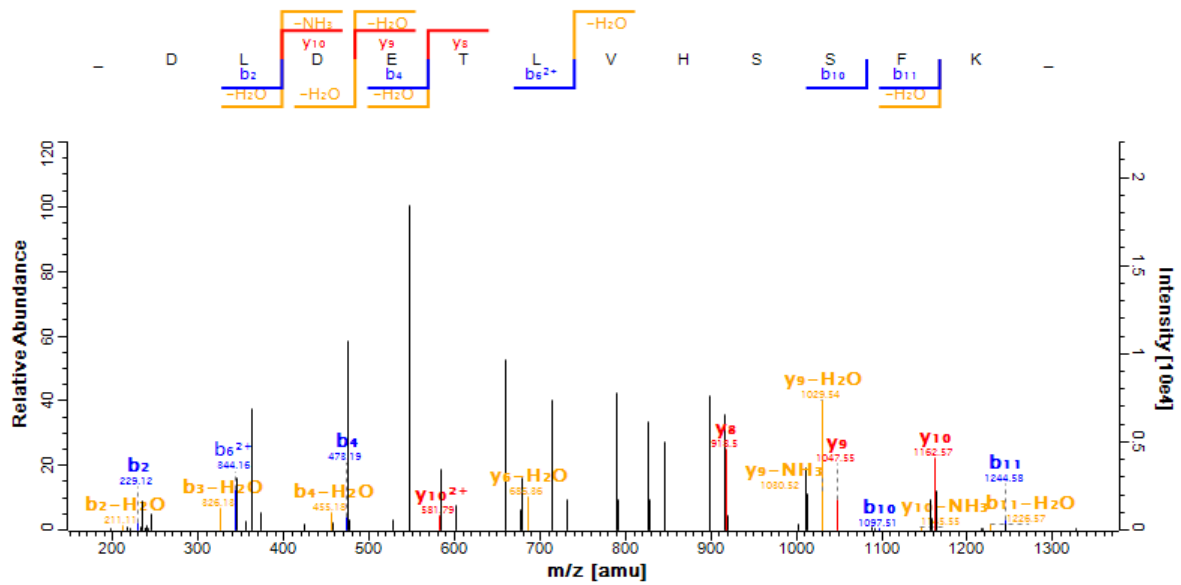

**Protein Group ID:** 1472  
**Protein Accession Numbers:** P46527; H7C2T1  
**Gene Names:** CDKN1B  
**Peptide Sequence:** TEENVSDGSPNAGSVEQTPK  
**Total Number of Spectra:** 5  
**Number of Replicates (out of 8):** 4  
**Best Match Score:** 153.36  
**Best Match Posterior Error Probability:** 2.37E-21  
**Best Match Spectrum:**

**Scan number** 16965      **Raw file** A549-US-WT-top20CID-Elite-2ug-B13  
**Method** ITMS; CID      **Genenames** CDKN1B

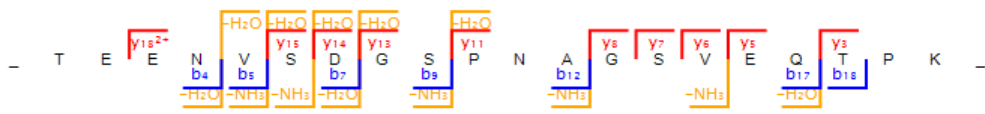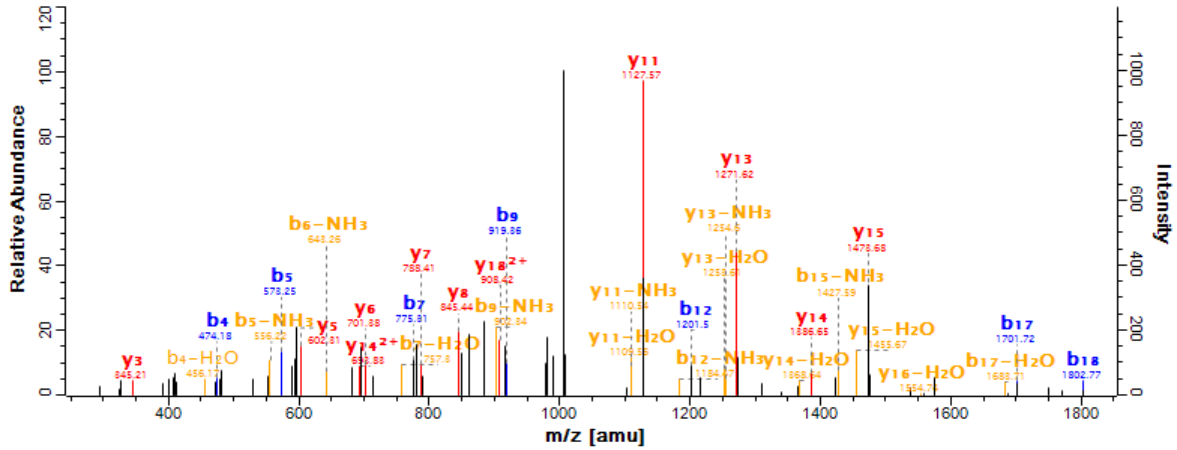

**Protein Group ID:** 1474

**Protein Accession Numbers:** J3KPZ3; O75592; O75592-2; H7C3U4

**Gene Names:** MYCBP2

**Peptide Sequence:** LISGDAEPTPEEK

**Total Number of Spectra:** 2

**Number of Replicates (out of 8):** 1

**Best Match Score:** 88.282

**Best Match Posterior Error Probability:** 0.00093743

**Best Match Spectrum:**

**Scan number** 17838      **Raw file** A549-US-WT-top20CID-Elite-2ug-B12  
**Method** ITMS; CID      **Genenames** MYCBP2

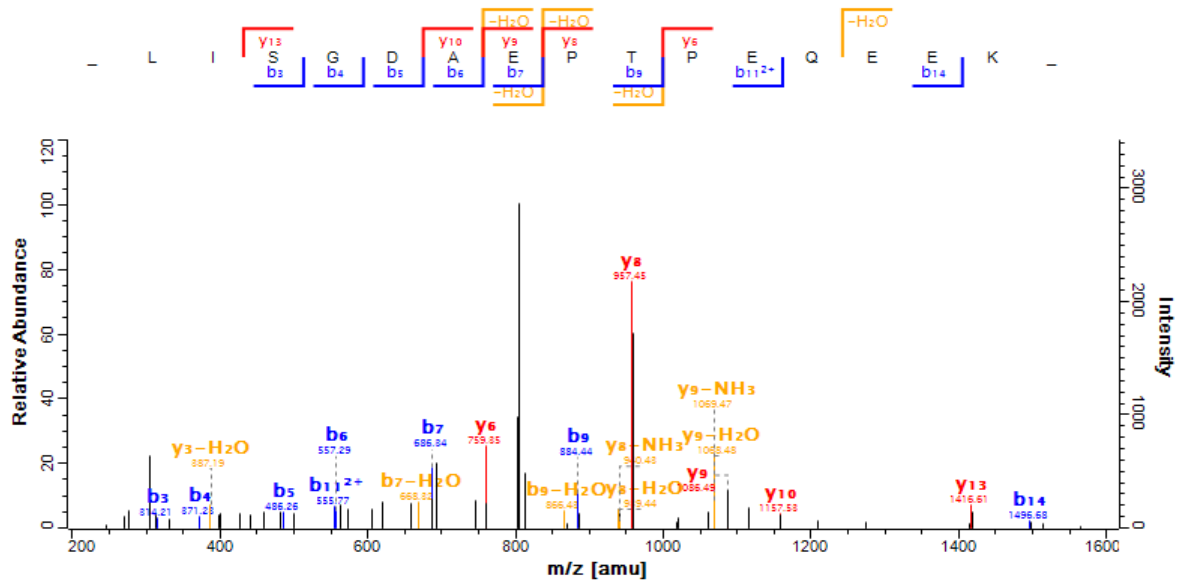

**Protein Group ID:** 1475  
**Protein Accession Numbers:** Q9H2C2; H7C484  
**Gene Names:** ARV1  
**Peptide Sequence:** GNVDGVAATPTAASASCQYR  
**Total Number of Spectra:** 7  
**Number of Replicates (out of 8):** 5  
**Best Match Score:** 153.21  
**Best Match Posterior Error Probability:** 1.03E-08  
**Best Match Spectrum:**

**Scan number** 25486      **Raw file** A549-US-Mock-top20CID-Elite-2ug-B12  
**Method** ITMS; CID      **Genenames** ARV1

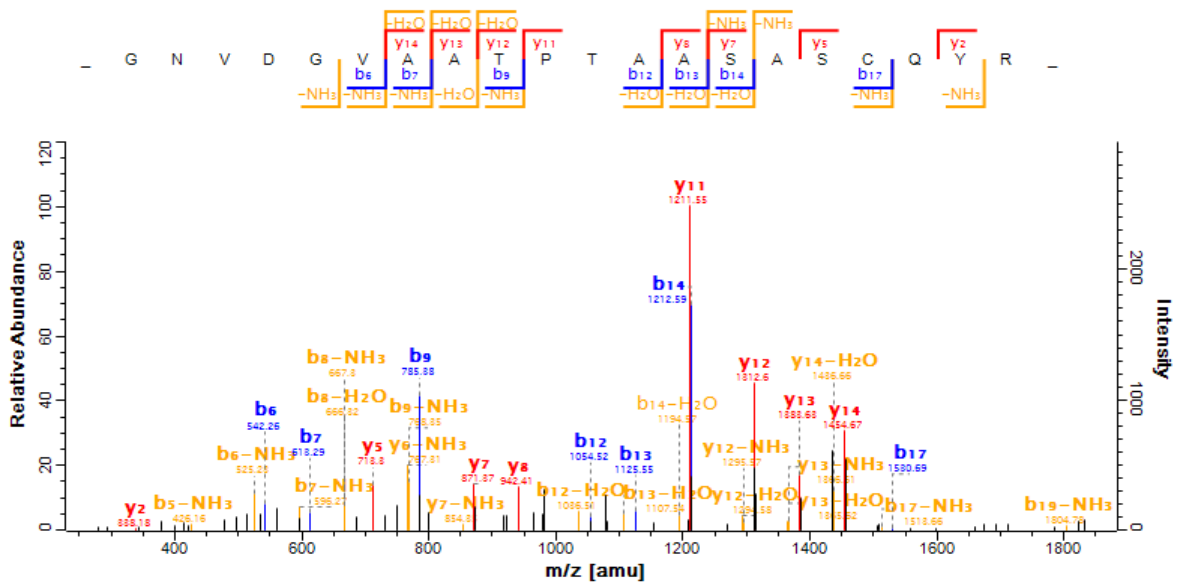

**Protein Group ID:** 1476  
**Protein Accession Numbers:** O14867; H7C4B6  
**Gene Names:** BACH1  
**Peptide Sequence:** ISESPEPGQR  
**Total Number of Spectra:** 4  
**Number of Replicates (out of 8):** 3  
**Best Match Score:** 115.78  
**Best Match Posterior Error Probability:** 0.00021181  
**Best Match Spectrum:**

**Scan number** 5371      **Raw file** A549-US-WT-top20CID-Elite-2ug-B12  
**Method** ITMS; CID      **Genenames** BACH1

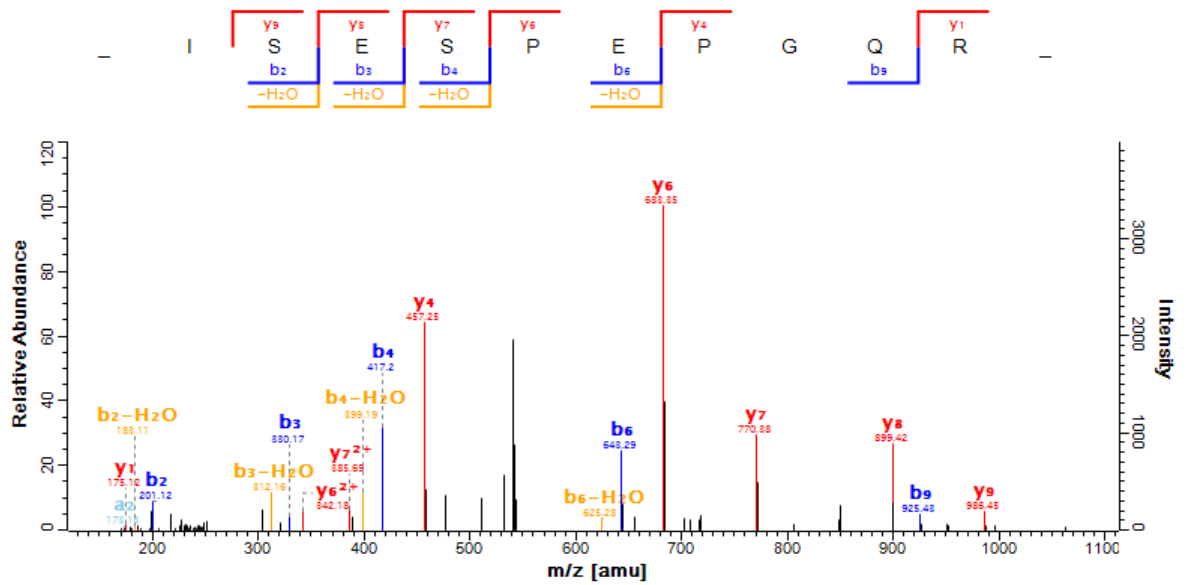





**Protein Group ID:** 1480

**Protein Accession Numbers:** H9KV90; Q9Y566; Q9Y566-3; Q9Y566-2

**Gene Names:** SHANK1

**Peptide Sequence:** AGLGSQEK

**Total Number of Spectra:** 1

**Number of Replicates (out of 8):** 1

**Best Match Score:** 109.01

**Best Match Posterior Error Probability:** 0.0032088

**Best Match Spectrum:**

|                    |           |                  |                                   |
|--------------------|-----------|------------------|-----------------------------------|
| <b>Scan number</b> | 1025      | <b>Raw file</b>  | A549-US-WT-top20CID-Elite-2ug-B14 |
| <b>Method</b>      | ITMS; CID | <b>Genenames</b> | SHANK1                            |

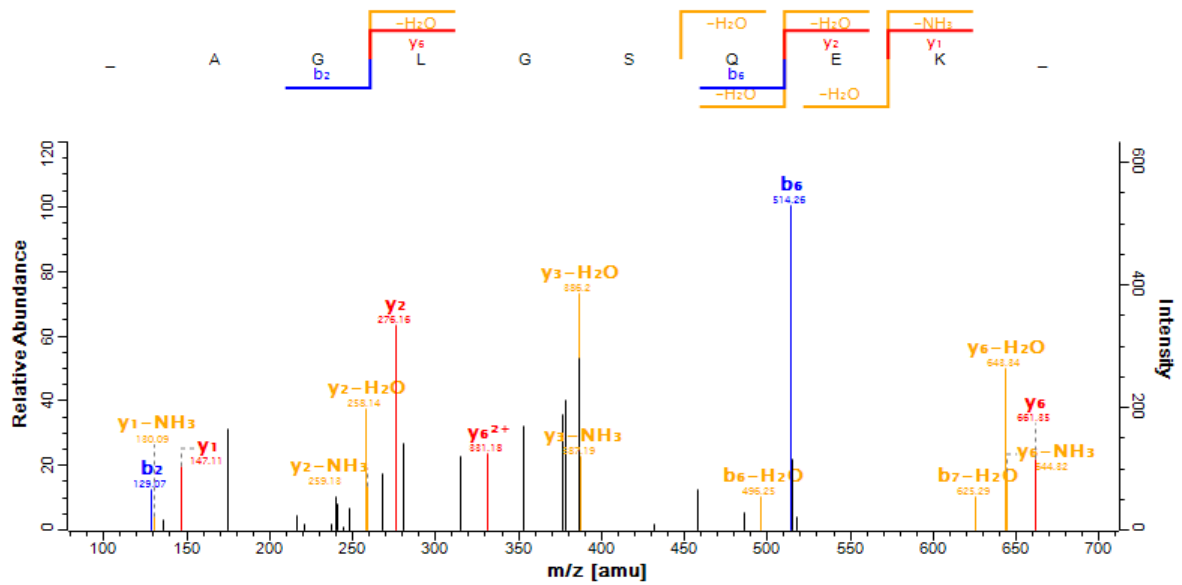

**Protein Group ID:** 1483  
**Protein Accession Numbers:** I3L097; Q6ZSR9  
**Gene Names:**  
**Peptide Sequence:** SSMAPSQPEESDVFLR  
**Total Number of Spectra:** 11  
**Number of Replicates (out of 8):** 7  
**Best Match Score:** 140.93  
**Best Match Posterior Error Probability:** 1.99E-05  
**Best Match Spectrum:**

**Scan number** 42326      **Raw file** A549-US-Mock-top20CID-Elite-2ug-B13  
**Method** ITMS; CID      **Pepti...** 140.93

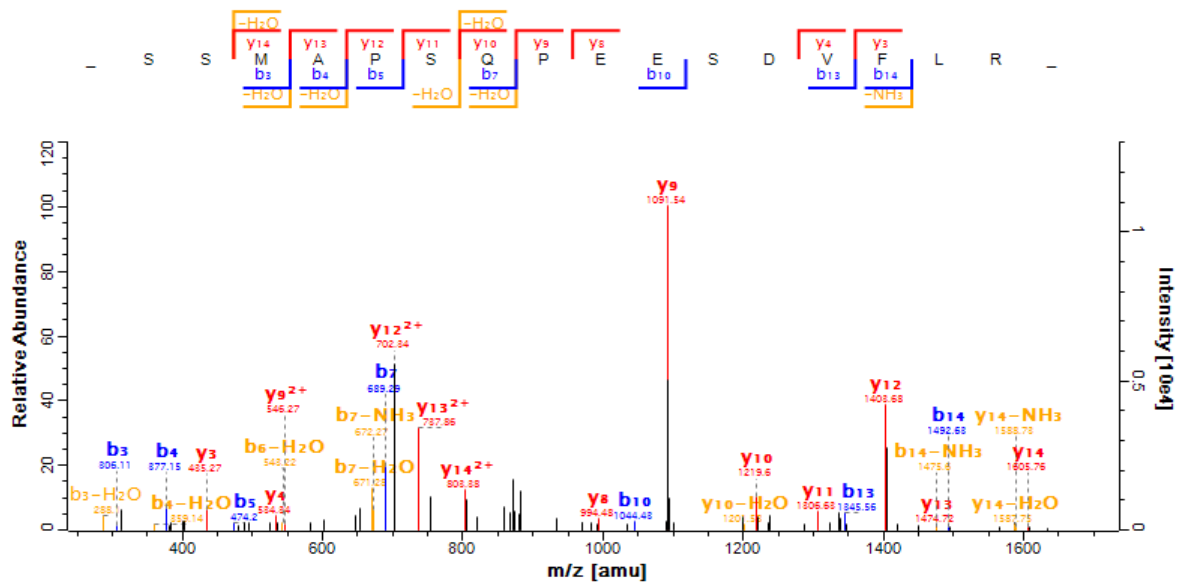

**Protein Group ID:** 1484  
**Protein Accession Numbers:** I3L0A4; Q9NQA3  
**Gene Names:** WASH6P  
**Peptide Sequence:** QDDGSSASPSVQGAPR  
**Total Number of Spectra:** 6  
**Number of Replicates (out of 8):** 5  
**Best Match Score:** 154.51  
**Best Match Posterior Error Probability:** 6.67E-07  
**Best Match Spectrum:**

**Scan number** 9532      **Raw file** A549-US-WT-top20CID-Elite-2ug-B12  
**Method** ITMS; CID      **Genenames** WASH6P

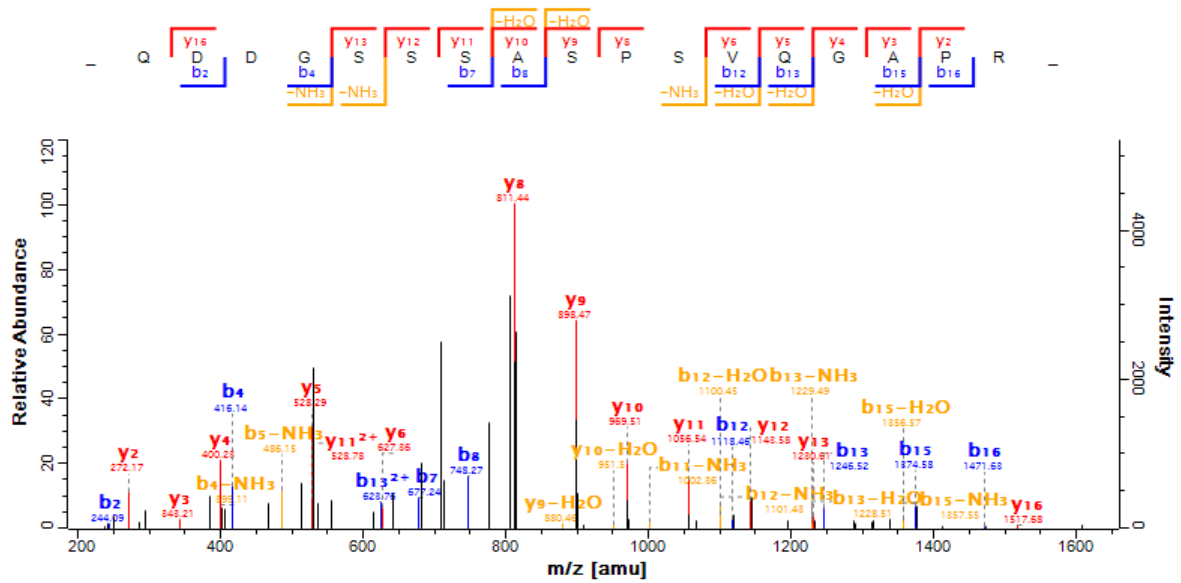

**Protein Group ID:** 1489

**Protein Accession Numbers:** I3L156; Q9BSJ6; I3L419; I3L1U3; Q9BSJ6-2; I3L476; I3L427

**Gene Names:** FAM64A

**Peptide Sequence:** SLQHQEQLDSK

**Total Number of Spectra:** 2

**Number of Replicates (out of 8):** 2

**Best Match Score:** 141.13

**Best Match Posterior Error Probability:** 1.17E-06

**Best Match Spectrum:**

**Scan number** 6046      **Raw file** A549-US-Mock-top20CID-Elite-2ug-B11  
**Method** ITMS; CID      **Genenames** FAM64A

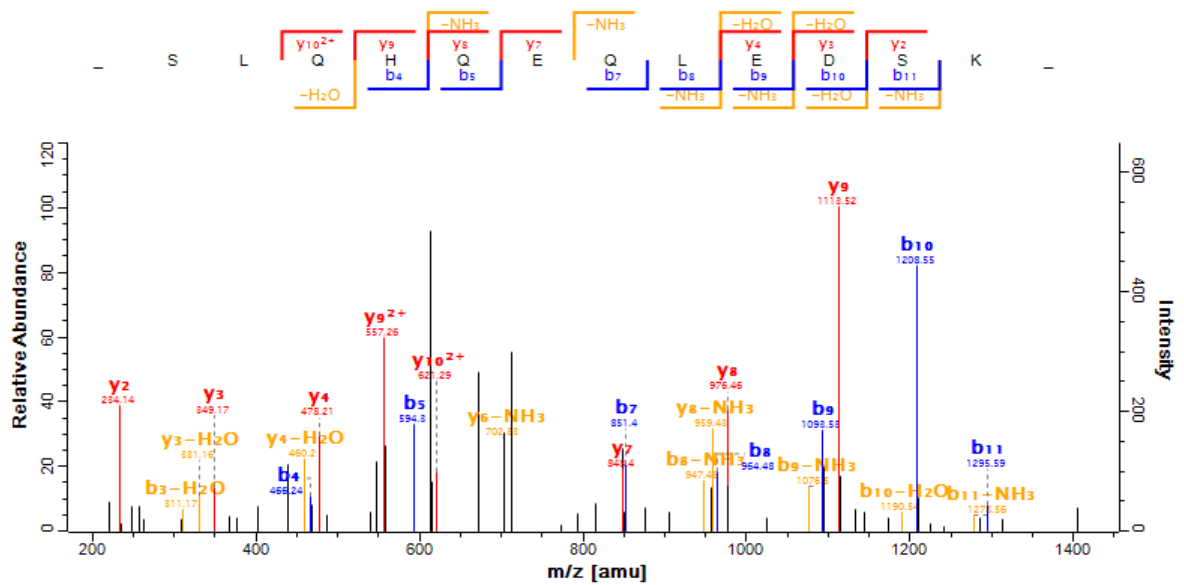

**Protein Group ID:** 1490

**Protein Accession Numbers:** Q9GZP9; I3L1T3

**Gene Names:** DERL2

**Peptide Sequence:** AIFDTPDEDPNYNPLPEERPGGFAGWGEGR

**Total Number of Spectra:** 12

**Number of Replicates (out of 8):** 7

**Best Match Score:** 133.95

**Best Match Posterior Error Probability:** 1.09E-27

**Best Match Spectrum:**

**Scan number** 65217      **Raw file** A549-US-Mock-top20CID-Elite-2ug-B13  
**Method** ITMS; CID      **Genenames** DERL2

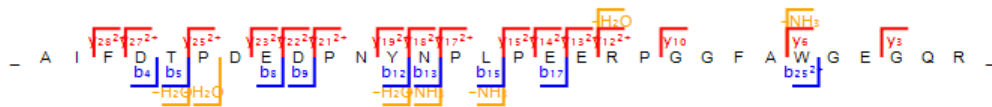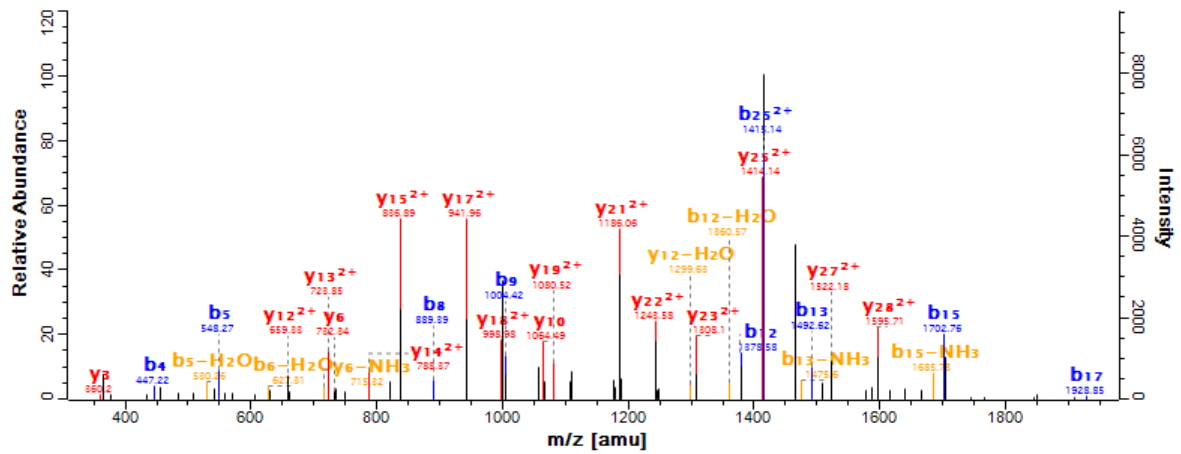

**Protein Group ID:** 1491

**Protein Accession Numbers:** I3L291; Q16625; Q16625-3; Q16625-2; Q16625-4; Q16625-5

**Gene Names:** OCLN

**Peptide Sequence:** YSSGGNFETPSK

**Total Number of Spectra:** 2

**Number of Replicates (out of 8):** 2

**Best Match Score:** 96.866

**Best Match Posterior Error Probability:** 0.00074086

**Best Match Spectrum:**

|                    |           |                  |                                   |
|--------------------|-----------|------------------|-----------------------------------|
| <b>Scan number</b> | 12826     | <b>Raw file</b>  | A549-US-WT-top20CID-Elite-2ug-814 |
| <b>Method</b>      | ITMS; CID | <b>Genenames</b> | OCLN                              |

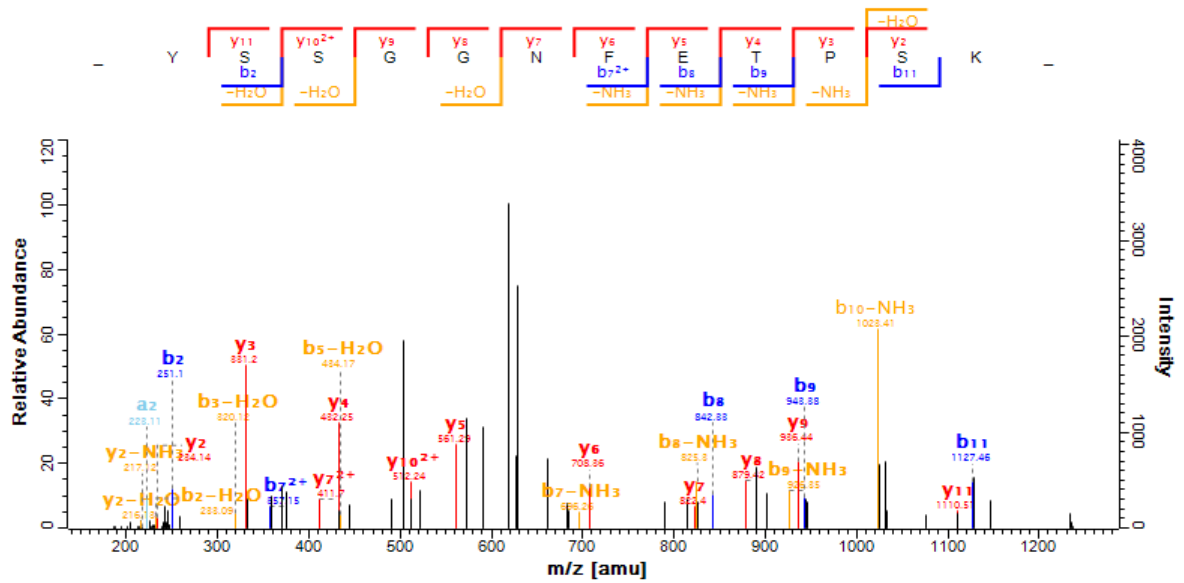

**Protein Group ID:** 1494  
**Protein Accession Numbers:** Q9Y3C7; I3L2J1  
**Gene Names:** MED31  
**Peptide Sequence:** LQQALAEQQQNNTSGK  
**Total Number of Spectra:** 2  
**Number of Replicates (out of 8):** 1  
**Best Match Score:** 135.08  
**Best Match Posterior Error Probability:** 6.84E-05  
**Best Match Spectrum:**

**Scan number** 9049      **Raw file** A549-US-Mock-top20CID-Elite-2ug-B11  
**Method** ITMS; CID      **Genenames** MED31

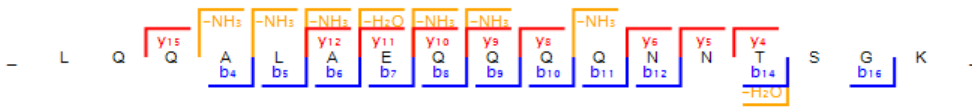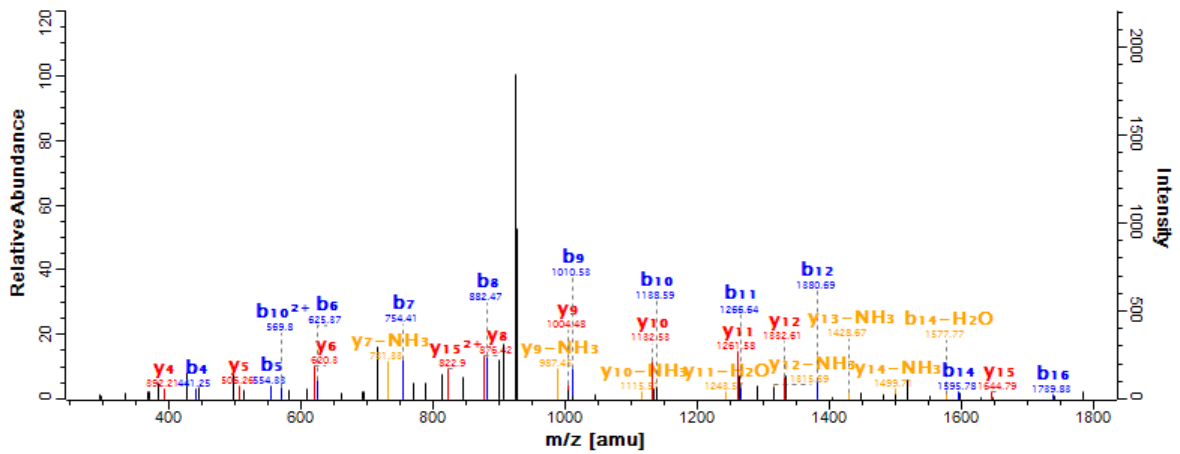



**Protein Group ID:** 1496

**Protein Accession Numbers:** I3L4A1; Q96FZ7; I3L4G8; I3L3E4

**Gene Names:** CHMP6

**Peptide Sequence:** ILDETQEAVEYQR

**Total Number of Spectra:** 4

**Number of Replicates (out of 8):** 4

**Best Match Score:** 173.25

**Best Match Posterior Error Probability:** 1.15E-13

**Best Match Spectrum:**

**Scan number** 29513      **Raw file** A549-US-WT-top20CID-Elite-2ug-B14  
**Method** ITMS; CID      **Genenames** CHMP6

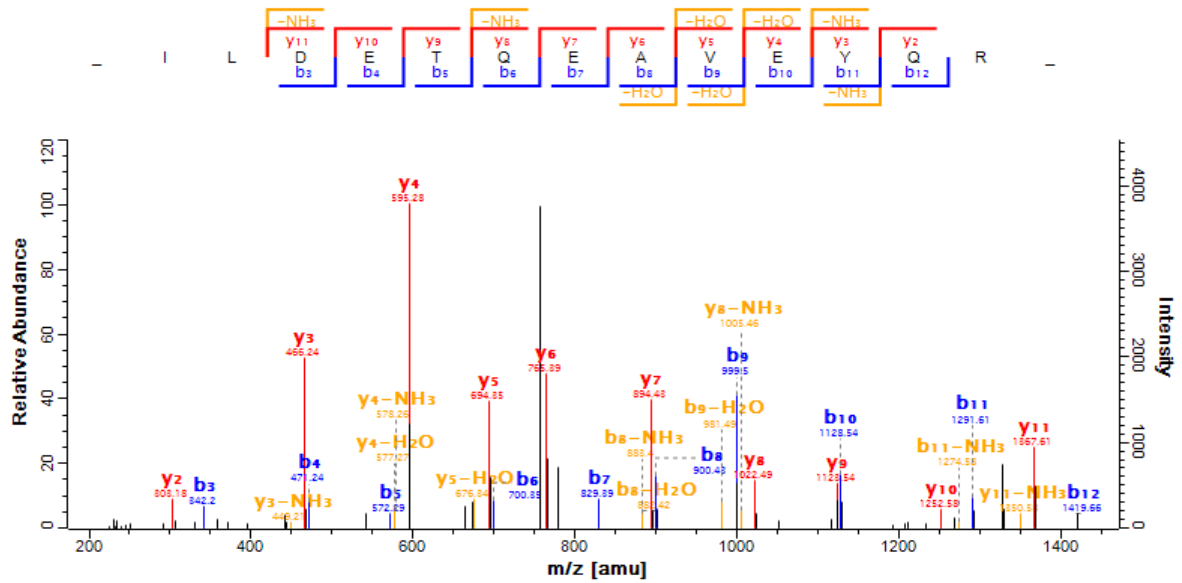



**Protein Group ID:** 1501  
**Protein Accession Numbers:** Q02127; I3NI32  
**Gene Names:** DHODH  
**Peptide Sequence:** TSVDAEDYAEGVR  
**Total Number of Spectra:** 2  
**Number of Replicates (out of 8):** 2  
**Best Match Score:** 88.706  
**Best Match Posterior Error Probability:** 0.0013205  
**Best Match Spectrum:**

**Scan number** 32047      **Raw file** A549-US-Mock-top20CID-Elite-2ug-B14  
**Method** ITMS; CID      **Genenames** DHODH

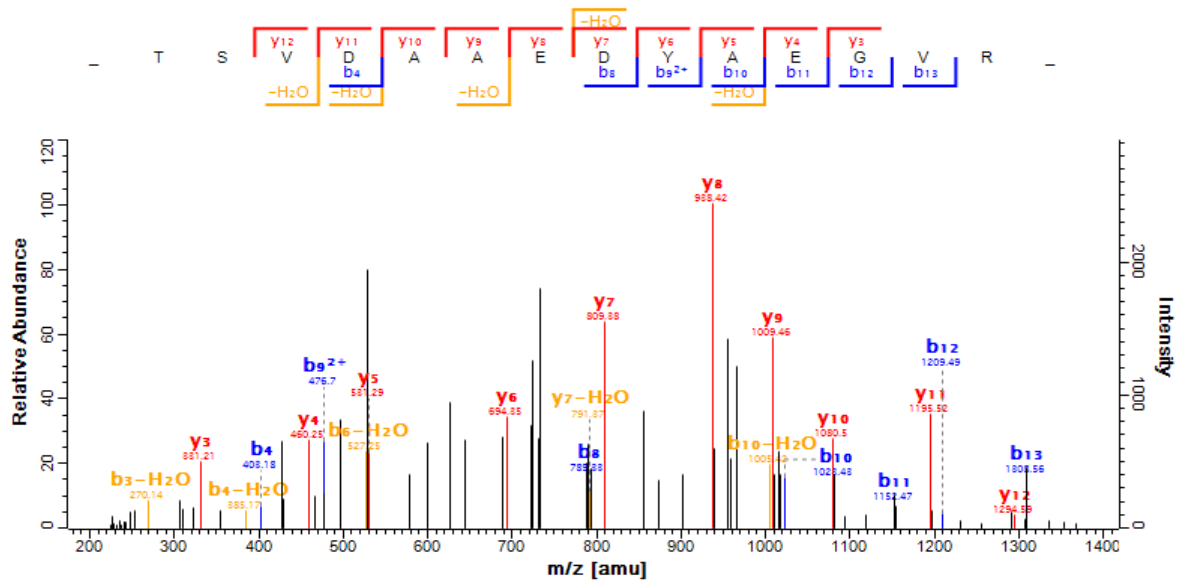

**Protein Group ID:** 1510

**Protein Accession Numbers:** J3KN36; Q5JPE7; P69849; Q5JPE7-2; F5H826; Q4G177

**Gene Names:** NOMO2;NOMO3

**Peptide Sequence:** LQGVGALGQAASDNSGPEDAK

**Total Number of Spectra:** 9

**Number of Replicates (out of 8):** 6

**Best Match Score:** 223.46

**Best Match Posterior Error Probability:** 3.15E-60

**Best Match Spectrum:**

|                    |           |                  |                                     |
|--------------------|-----------|------------------|-------------------------------------|
| <b>Scan number</b> | 31468     | <b>Raw file</b>  | A549-US-Mock-top20CID-Elite-2ug-B13 |
| <b>Method</b>      | ITMS; CID | <b>Genenames</b> | NOMO2;NOMO3                         |

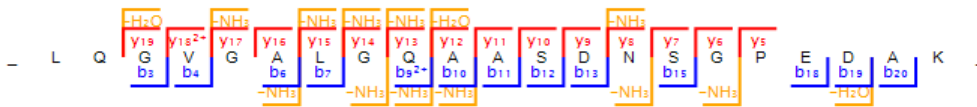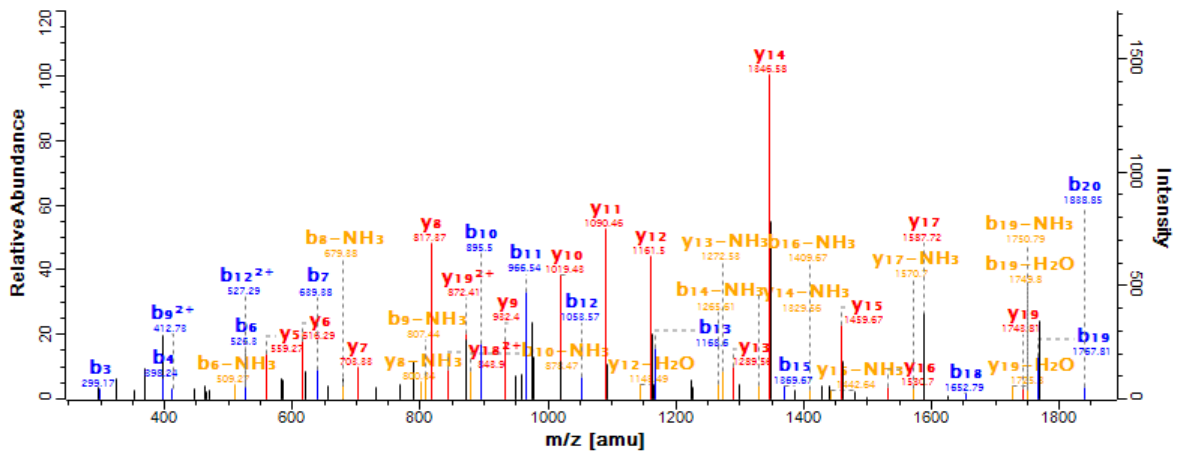



**Protein Group ID:** 1515  
**Protein Accession Numbers:** P52655; J3KNC0  
**Gene Names:** GTF2A1  
**Peptide Sequence:** SVIEDVINDV R  
**Total Number of Spectra:** 9  
**Number of Replicates (out of 8):** 8  
**Best Match Score:** 134.99  
**Best Match Posterior Error Probability:** 3.77E-05  
**Best Match Spectrum:**

**Scan number** 62766      **Raw file** A549-US-WT-top20CID-Elite-2ug-B14  
**Method** ITMS; CID      **Genenames** GTF2A1

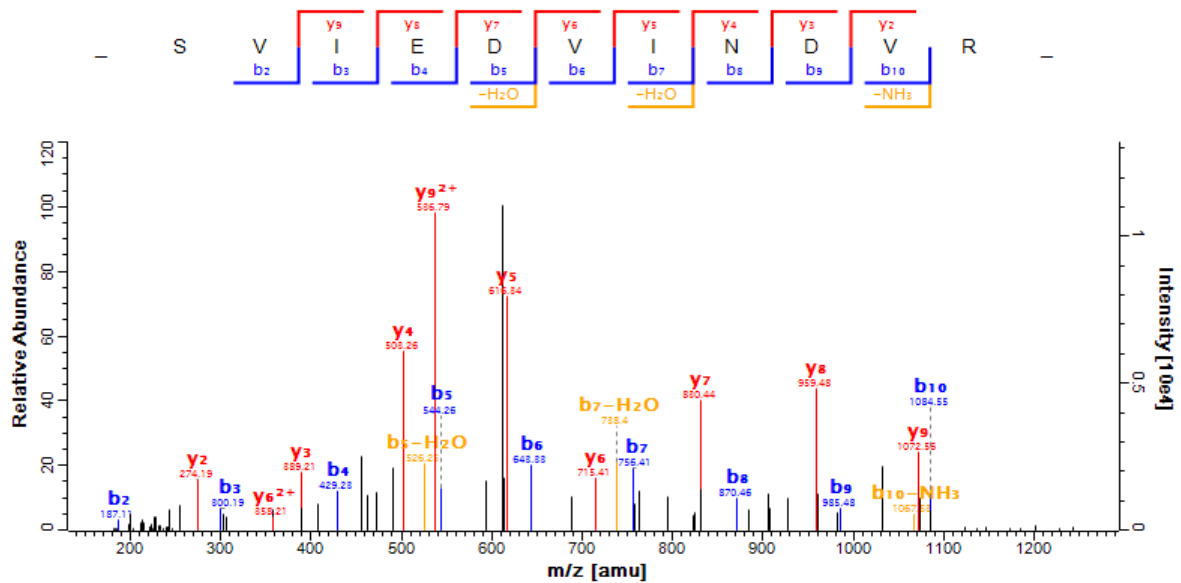

**Protein Group ID:** 1516  
**Protein Accession Numbers:** Q16134; J3KND9  
**Gene Names:** ETFDH  
**Peptide Sequence:** SGILAAESIFNQLTSENLSK  
**Total Number of Spectra:** 7  
**Number of Replicates (out of 8):** 6  
**Best Match Score:** 182.82  
**Best Match Posterior Error Probability:** 5.43E-27  
**Best Match Spectrum:**

**Scan number** 84173      **Raw file** A549-US-Mock-top20CID-Elite-2ug-B14  
**Method** ITMS; CID      **Genenames** ETFDH

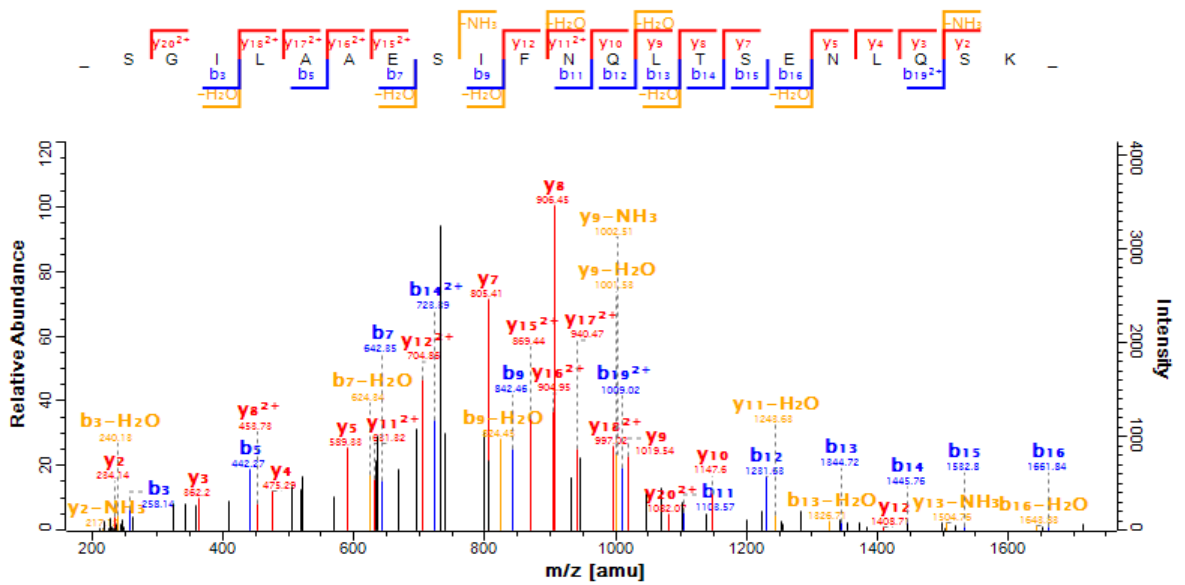

**Protein Group ID:** 1523  
**Protein Accession Numbers:** J3KNK4; Q9Y587  
**Gene Names:** AP4S1  
**Peptide Sequence:** ILAPLLILDK  
**Total Number of Spectra:** 6  
**Number of Replicates (out of 8):** 6  
**Best Match Score:** 98.249  
**Best Match Posterior Error Probability:** 0.00091571  
**Best Match Spectrum:**

**Scan number** 72627      **Raw file** A549-US-Mock-top20CID-Elite-2ug-B11  
**Method** ITMS; CID      **Genenames** AP4S1

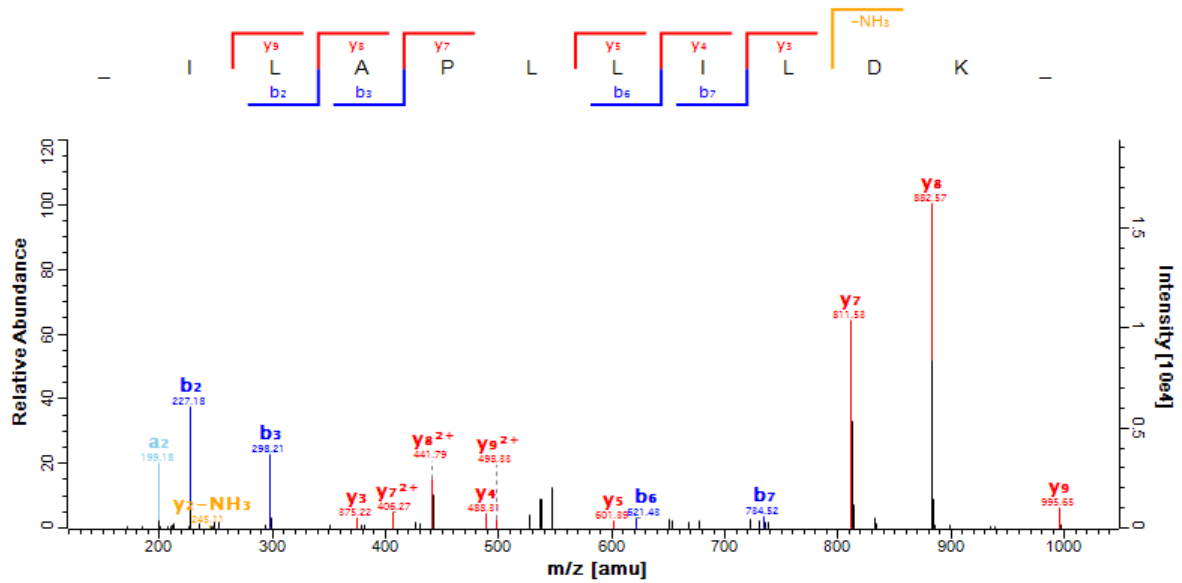



**Protein Group ID:** 1525

**Protein Accession Numbers:** J3KNM0; P35813; P35813-2

**Gene Names:** PPM1A

**Peptide Sequence:** VCNEVVDTCLYK

**Total Number of Spectra:** 1

**Number of Replicates (out of 8):** 1

**Best Match Score:** 108.72

**Best Match Posterior Error Probability:** 0.00029906

**Best Match Spectrum:**

**Scan number** 33294      **Raw file** A549-US-WT-top20CID-Elite-2ug-B13  
**Method** ITMS; CID      **Genenames** PPM1A

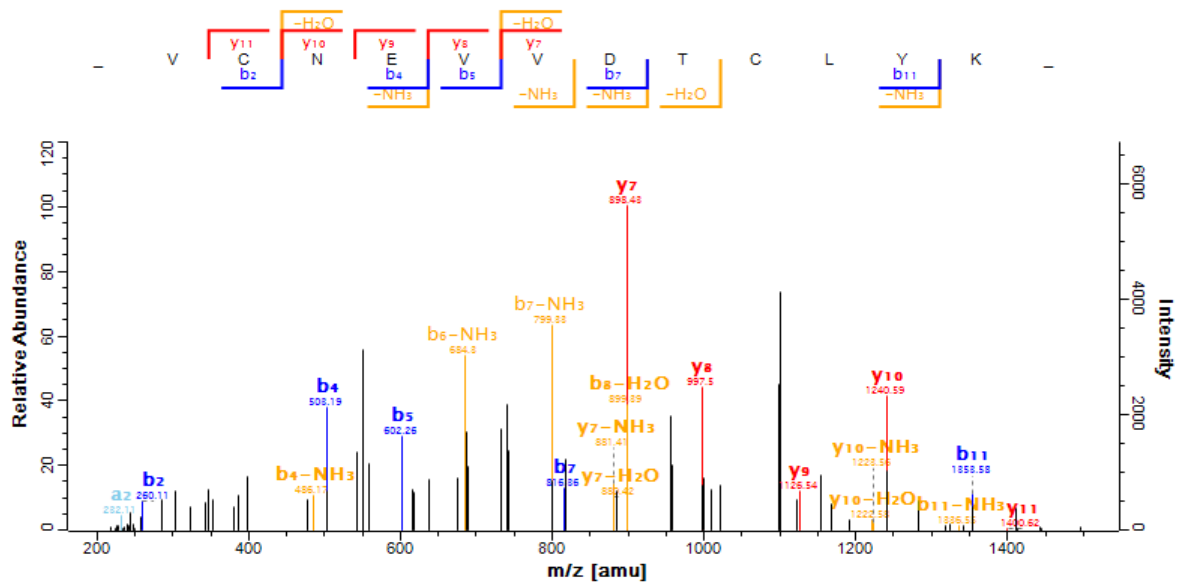

**Protein Group ID:** 1529

**Protein Accession Numbers:** P32856; P32856-2; P32856-3; J3KNU7

**Gene Names:** STX2

**Peptide Sequence:** DHFMDDFFHQVEEIR

**Total Number of Spectra:** 2

**Number of Replicates (out of 8):** 2

**Best Match Score:** 106.58

**Best Match Posterior Error Probability:** 0.00015487

**Best Match Spectrum:**

|                    |           |                  |                                     |
|--------------------|-----------|------------------|-------------------------------------|
| <b>Scan number</b> | 74554     | <b>Raw file</b>  | A549-US-Mock-top20CID-Elite-2ug-B13 |
| <b>Method</b>      | ITMS; CID | <b>Genenames</b> | STX2                                |

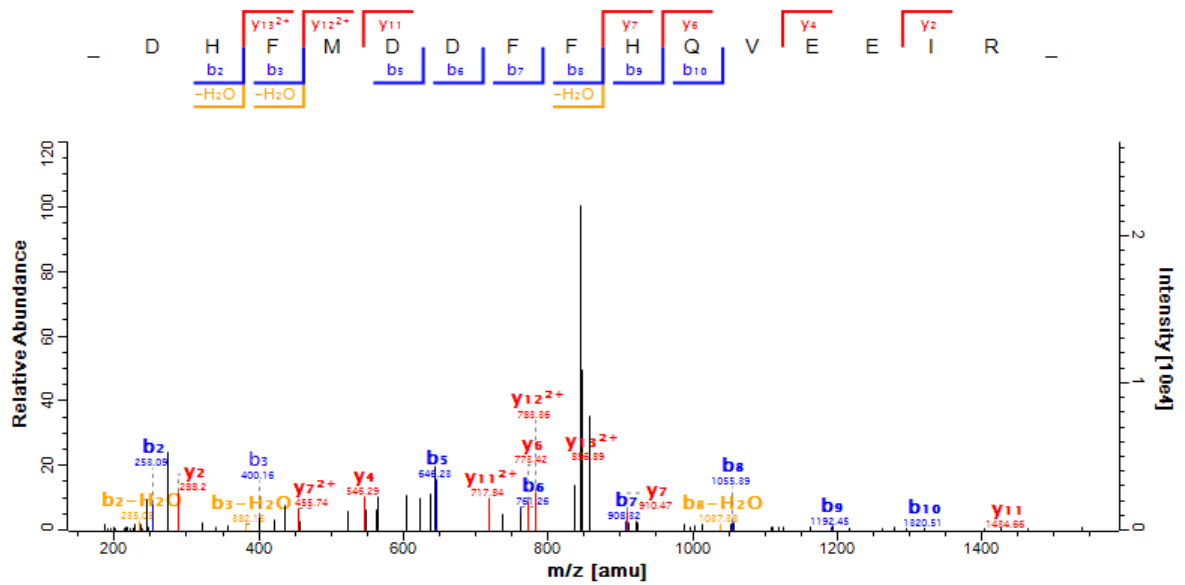

**Protein Group ID:** 1539

**Protein Accession Numbers:** J3KPT4; Q9H4I3; Q9H4I3-2

**Gene Names:** TRABD

**Peptide Sequence:** MDGEEQPPHEANVEPVPSEASEPVPR

**Total Number of Spectra:** 3

**Number of Replicates (out of 8):** 3

**Best Match Score:** 69.981

**Best Match Posterior Error Probability:** 0.00017647

**Best Match Spectrum:**

**Scan number** 44305      **Raw file** A549-US-Mock-top20CID-Elite-2ug-B11  
**Method** ITMS; CID      **Genenames** TRABD

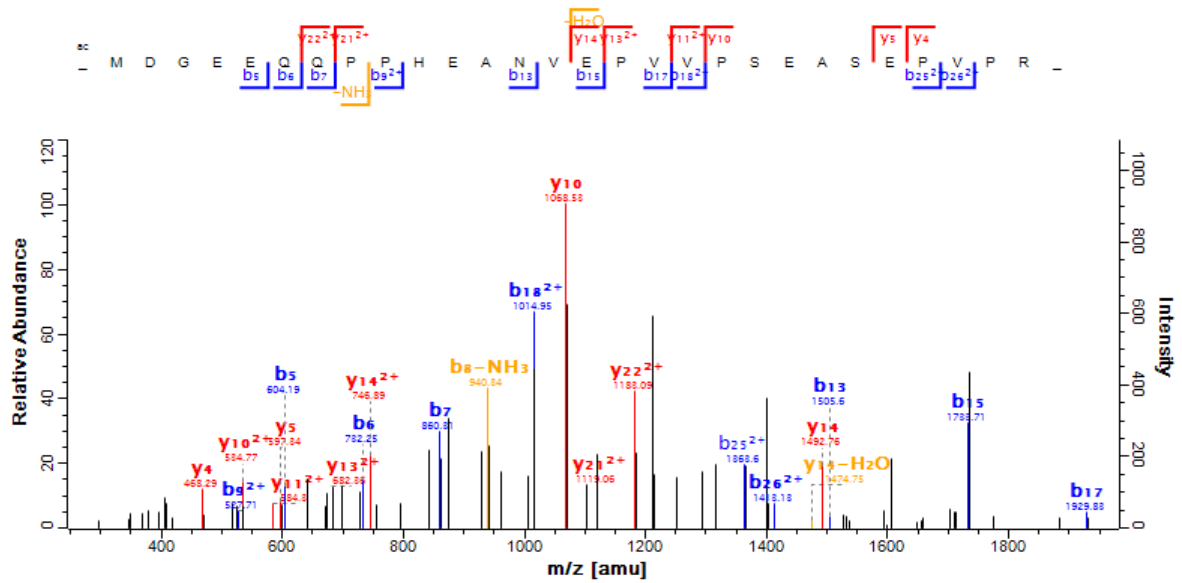

**Protein Group ID:** 1540  
**Protein Accession Numbers:** J3KPU0; Q9P0J1  
**Gene Names:** PDP1  
**Peptide Sequence:** LLGLLMPFR  
**Total Number of Spectra:** 1  
**Number of Replicates (out of 8):** 1  
**Best Match Score:** 109.86  
**Best Match Posterior Error Probability:** 0.00099556  
**Best Match Spectrum:**

|                    |           |                  |                                   |
|--------------------|-----------|------------------|-----------------------------------|
| <b>Scan number</b> | 79018     | <b>Raw file</b>  | A549-US-WT-top20CID-Elite-2ug-B11 |
| <b>Method</b>      | ITMS; CID | <b>Genenames</b> | PDP1                              |

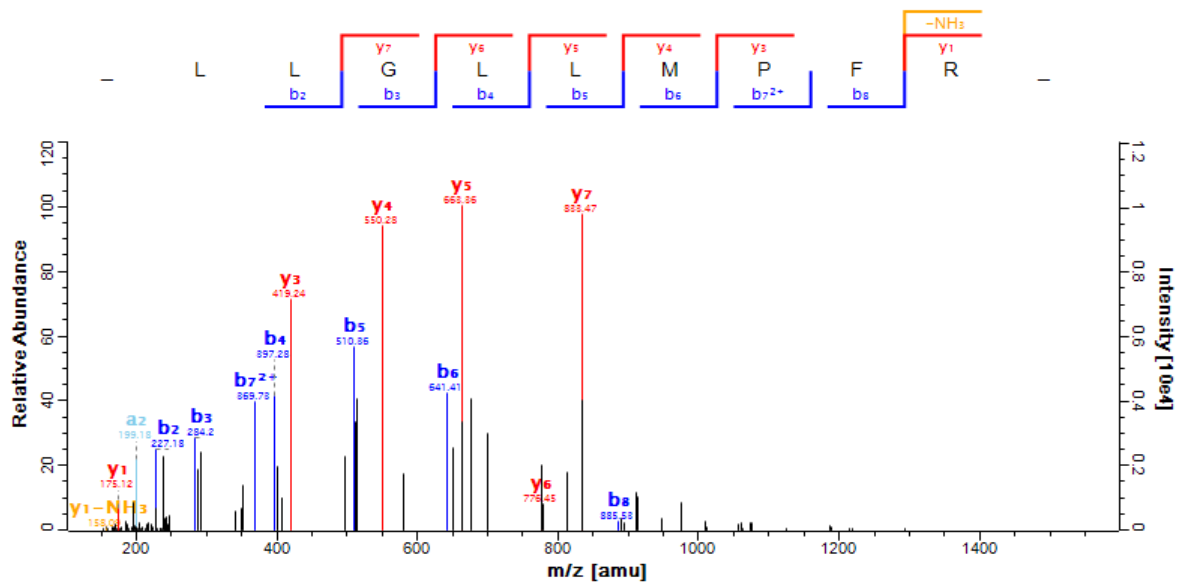

**Protein Group ID:** 1541  
**Protein Accession Numbers:** J3KPV3; O60830  
**Gene Names:** TIMM17B  
**Peptide Sequence:** DGTPAPGYPSYQYH  
**Total Number of Spectra:** 6  
**Number of Replicates (out of 8):** 5  
**Best Match Score:** 107.14  
**Best Match Posterior Error Probability:** 0.00015065  
**Best Match Spectrum:**

**Scan number** 29091      **Raw file** A549-US-WT-top20CID-Elite-2ug-814  
**Method** ITMS; CID      **Genenames** TIMM17B

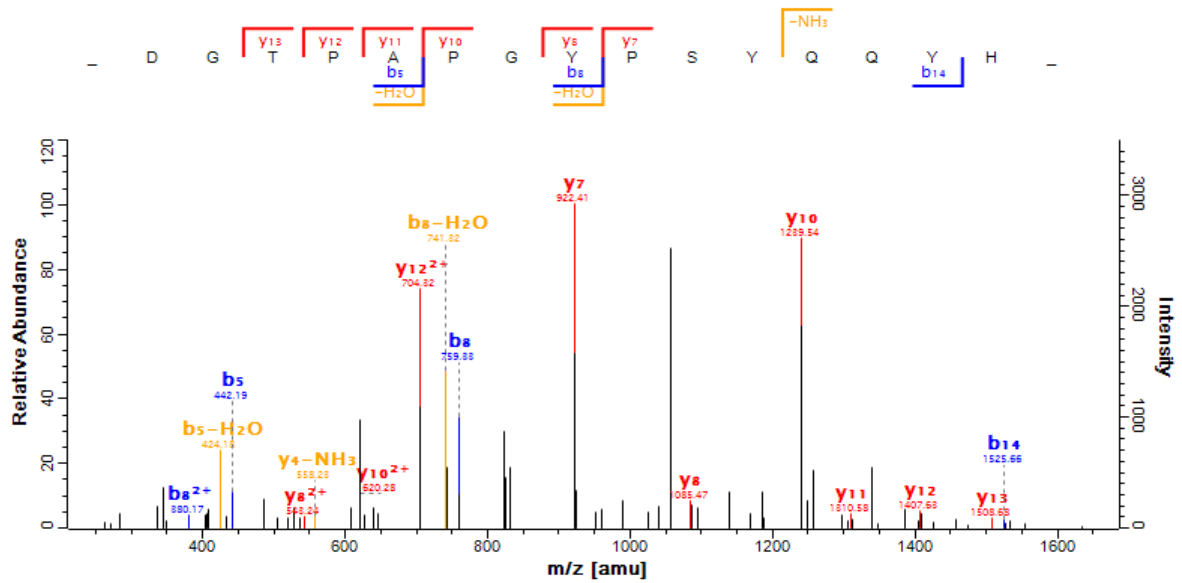

**Protein Group ID:** 1548  
**Protein Accession Numbers:** J3KQ40; O95759  
**Gene Names:** TBC1D8  
**Peptide Sequence:** LAEQEEEPEK  
**Total Number of Spectra:** 3  
**Number of Replicates (out of 8):** 3  
**Best Match Score:** 89.548  
**Best Match Posterior Error Probability:** 0.0020368  
**Best Match Spectrum:**

|                    |           |                  |                                   |
|--------------------|-----------|------------------|-----------------------------------|
| <b>Scan number</b> | 5414      | <b>Raw file</b>  | A549-US-WT-top20CID-Elite-2ug-B12 |
| <b>Method</b>      | ITMS; CID | <b>Genenames</b> | TBC1D8                            |

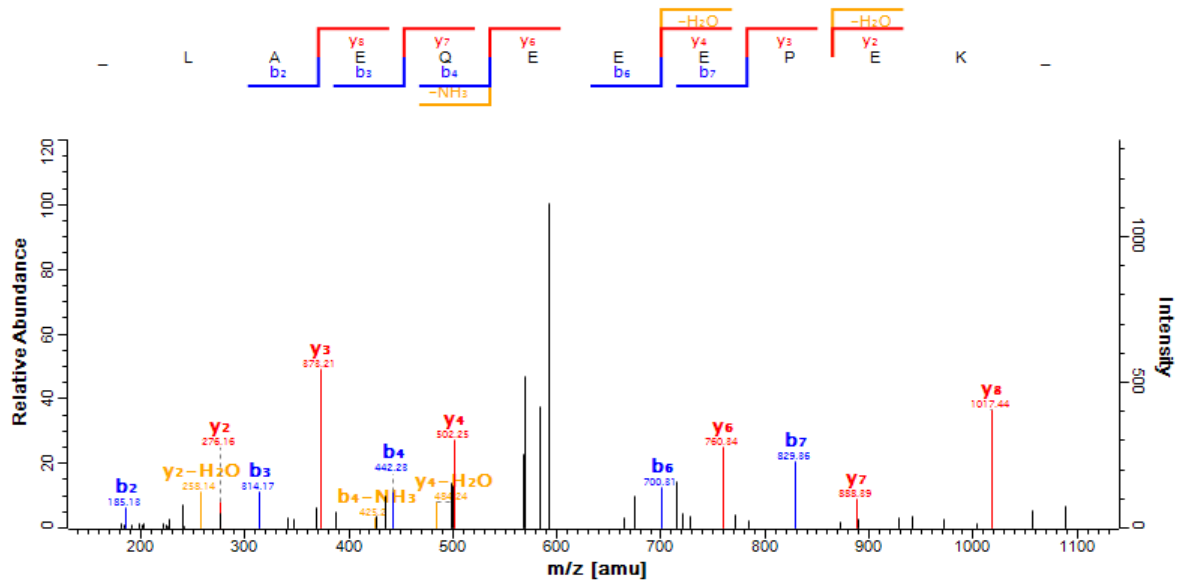

**Protein Group ID:** 1559  
**Protein Accession Numbers:** J3KQV0; P38936  
**Gene Names:** CDKN1A  
**Peptide Sequence:** SGEQAEGSPGGPGDSQGR  
**Total Number of Spectra:** 5  
**Number of Replicates (out of 8):** 5  
**Best Match Score:** 117.3  
**Best Match Posterior Error Probability:** 5.52E-05  
**Best Match Spectrum:**

**Scan number** 3148      **Raw file** A549-US-Mock-top20CID-Elite-2ug-B12  
**Method** ITMS; CID      **Genenames** CDKN1A

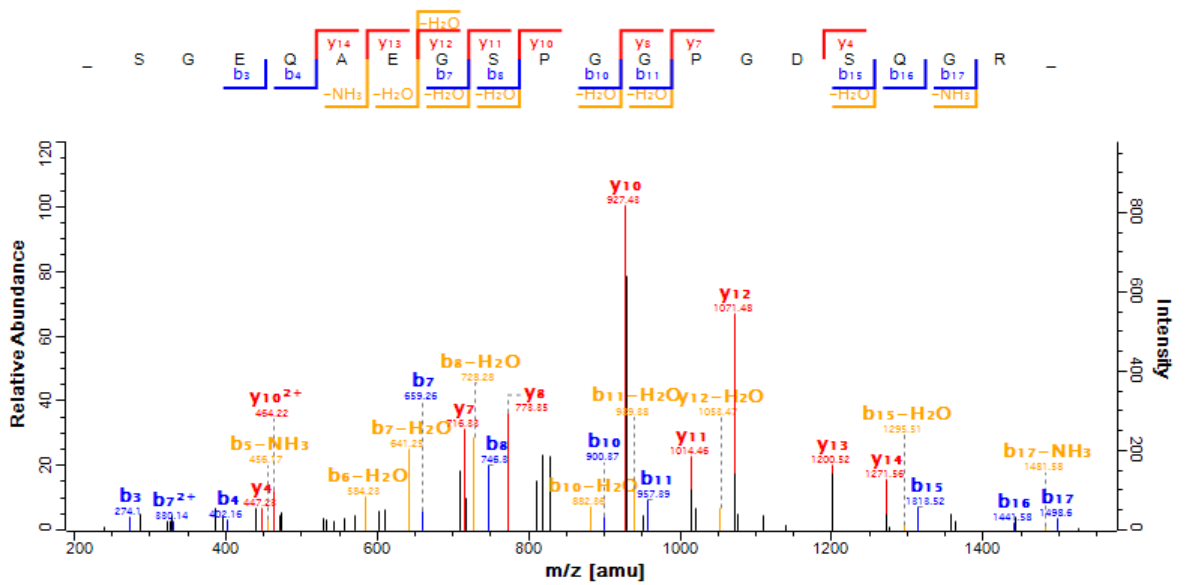

**Protein Group ID:** 1567

**Protein Accession Numbers:** P02686; J3QQK6; P02686-2; J3KS94

**Gene Names:** MBP

**Peptide Sequence:** DRPSEDELQTIQEDSAATSESLDVMASQK

**Total Number of Spectra:** 1

**Number of Replicates (out of 8):** 1

**Best Match Score:** 103.04

**Best Match Posterior Error Probability:** 2.32E-06

**Best Match Spectrum:**

|                    |           |                  |                                   |
|--------------------|-----------|------------------|-----------------------------------|
| <b>Scan number</b> | 65618     | <b>Raw file</b>  | A549-US-WT-top20CID-Elite-2ug-B12 |
| <b>Method</b>      | ITMS; CID | <b>Genenames</b> | MBP                               |

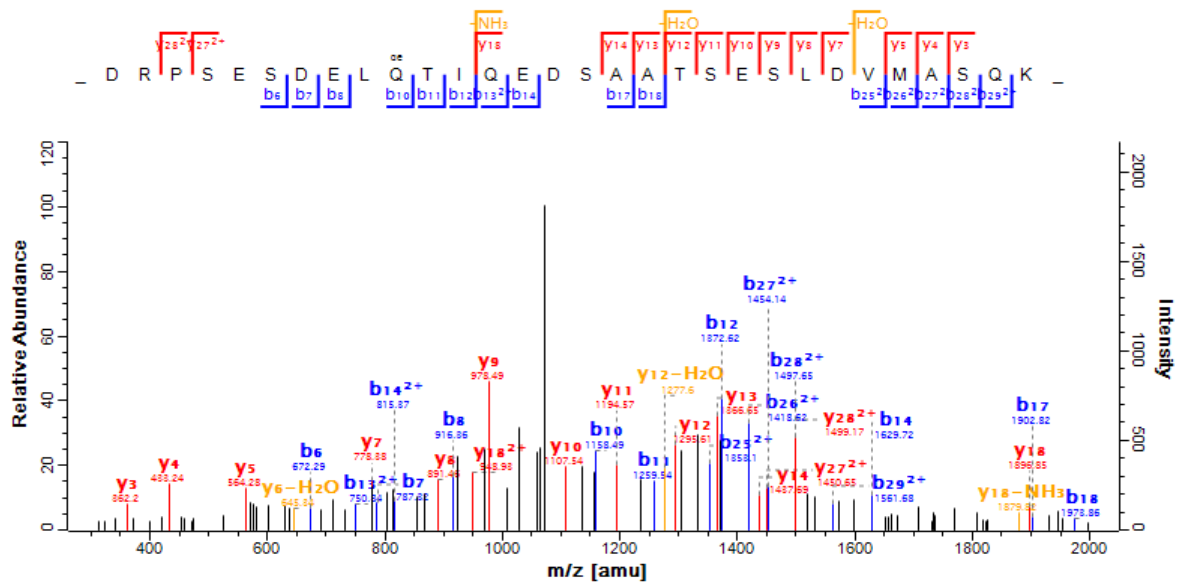





**Protein Group ID:** 1569

**Protein Accession Numbers:** Q8WYR1; J3KSW1; Q8WYR1-2

**Gene Names:** PIK3R5

**Peptide Sequence:** ILQSVVRCEVPYK

**Total Number of Spectra:** 1

**Number of Replicates (out of 8):** 1

**Best Match Score:** 94.717

**Best Match Posterior Error Probability:** 0.002263

**Best Match Spectrum:**

**Scan number** 42384      **Raw file** A549-US-Mock-top20CID-Elite-2ug-B12  
**Method** ITMS; CID      **Genenames** PIK3R5

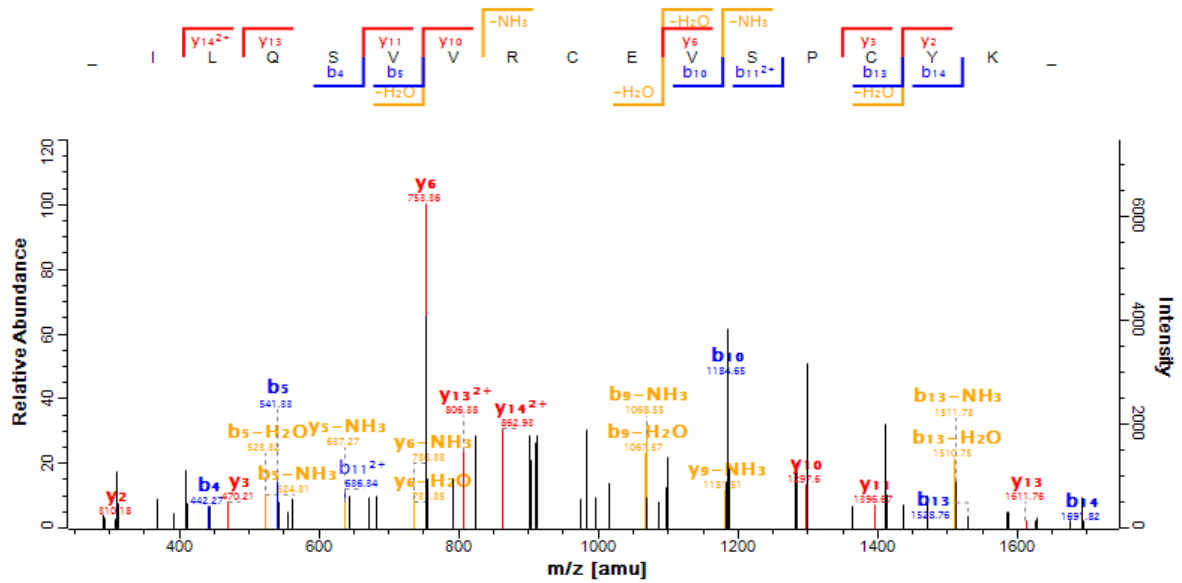

**Protein Group ID:** 1583  
**Protein Accession Numbers:** Q15022; J3QQW9  
**Gene Names:** SUZ12  
**Peptide Sequence:** NSESLHQENKPGSVKPTQTIAVK  
**Total Number of Spectra:** 1  
**Number of Replicates (out of 8):** 1  
**Best Match Score:** 80.303  
**Best Match Posterior Error Probability:** 0.0022941  
**Best Match Spectrum:**

**Scan number** 16615      **Raw file** A549-US-WT-top20CID-Elite-2ug-B11  
**Method** ITMS; CID      **Genenames** SUZ12

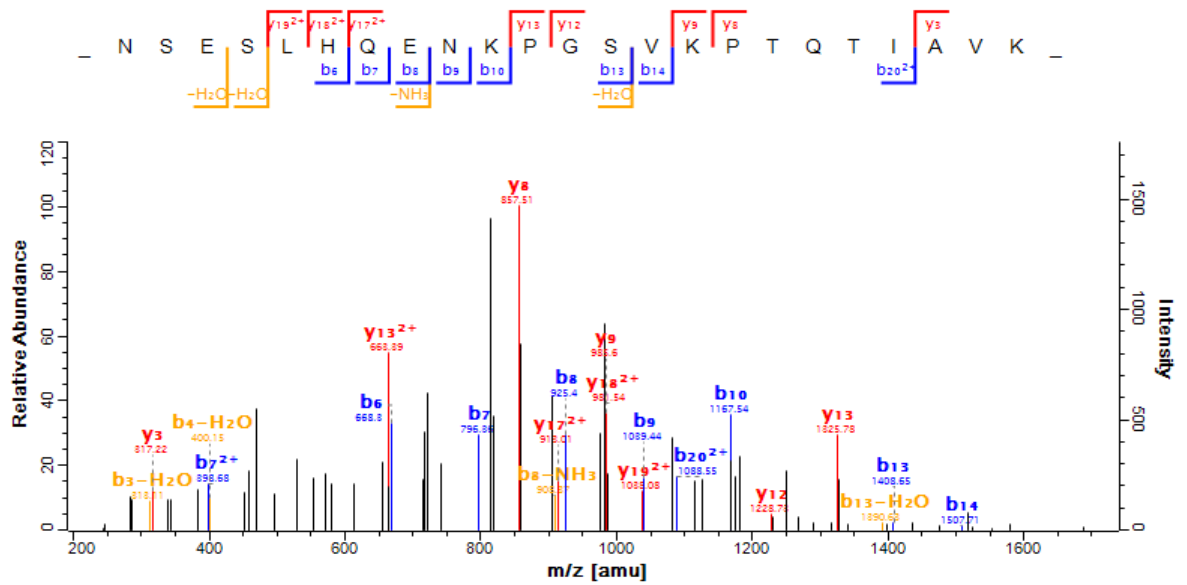

**Protein Group ID:** 1587  
**Protein Accession Numbers:** Q9BVV7; J3QRI1  
**Gene Names:** TIMM21  
**Peptide Sequence:** FYIEGSEPGK  
**Total Number of Spectra:** 4  
**Number of Replicates (out of 8):** 4  
**Best Match Score:** 96.143  
**Best Match Posterior Error Probability:** 0.001187  
**Best Match Spectrum:**

|                    |           |                  |                                     |
|--------------------|-----------|------------------|-------------------------------------|
| <b>Scan number</b> | 24298     | <b>Raw file</b>  | A549-US-Mock-top20CID-Elite-2ug-B12 |
| <b>Method</b>      | ITMS; CID | <b>Genenames</b> | TIMM21                              |

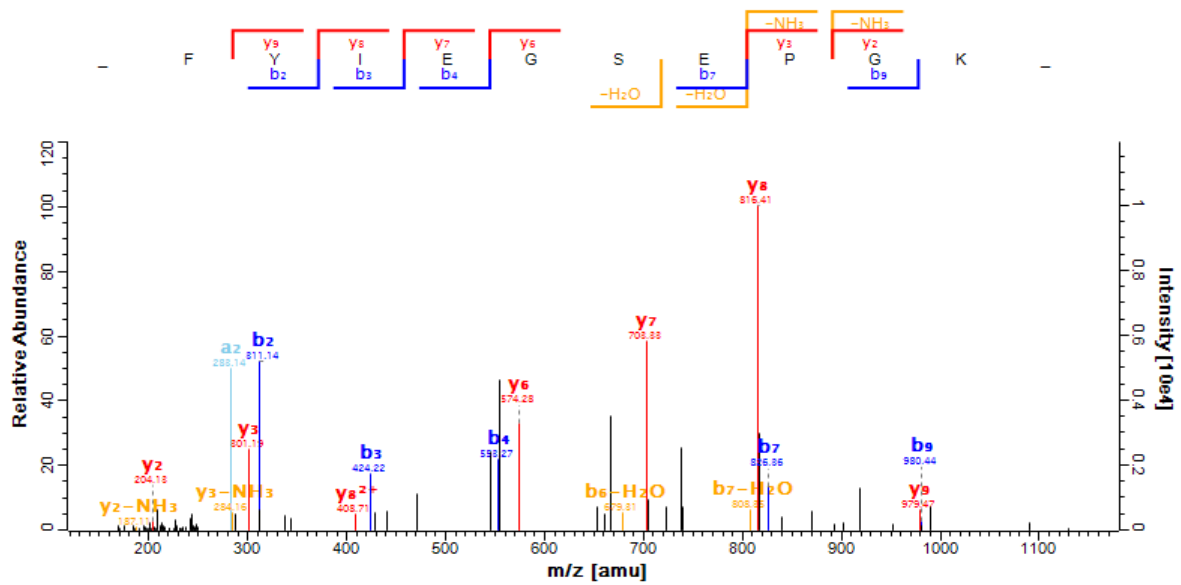



**Protein Group ID:** 1589

**Protein Accession Numbers:** J3QRS3; P19105; J3KTJ1

**Gene Names:** MYL12A

**Peptide Sequence:** NPTDEYLDAMMNEAPGPINFTMFLTMFGEK

**Total Number of Spectra:** 7

**Number of Replicates (out of 8):** 7

**Best Match Score:** 100.17

**Best Match Posterior Error Probability:** 9.42E-10

**Best Match Spectrum:**

**Scan number** 97392      **Raw file** A549-US-WT-top20CID-Elite-2ug-B11  
**Method** ITMS; CID      **Genenames** MYL12A

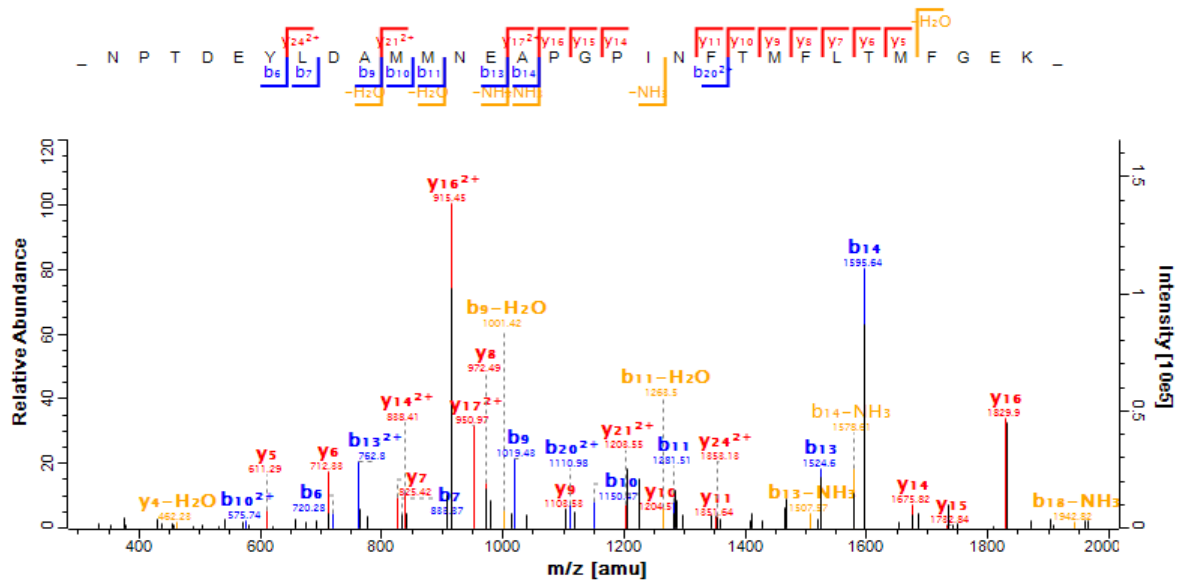

**Protein Group ID:** 1592

**Protein Accession Numbers:** Q8N9M1; Q8N9M1-2; Q8N9M1-3; J3QS80

**Gene Names:** C19orf47

**Peptide Sequence:** ATSSATTAAPTLR

**Total Number of Spectra:** 4

**Number of Replicates (out of 8):** 4

**Best Match Score:** 89.507

**Best Match Posterior Error Probability:** 0.0012443

**Best Match Spectrum:**

**Scan number** 15159      **Raw file** A549-US-Mock-top20CID-Elite-2ug-B12  
**Method** ITMS; CID      **Genenames** C19orf47

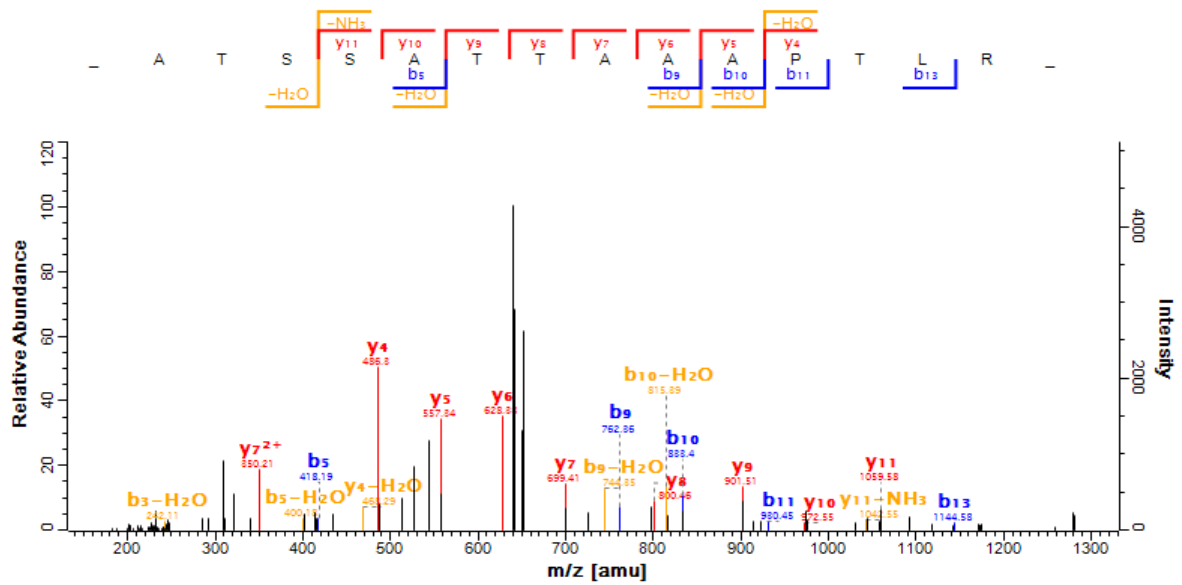

**Protein Group ID:** 1600

**Protein Accession Numbers:** J3QTI6; Q5CZC0; Q5CZC0-2

**Gene Names:** FSIP2

**Peptide Sequence:** EKEILLSNAHIPSVASEIENMLEK

**Total Number of Spectra:** 1

**Number of Replicates (out of 8):** 1

**Best Match Score:** 70.072

**Best Match Posterior Error Probability:** 0.0017736

**Best Match Spectrum:**

|                    |           |                  |                                   |
|--------------------|-----------|------------------|-----------------------------------|
| <b>Scan number</b> | 74012     | <b>Raw file</b>  | A549-US-WT-top20CID-Elite-2ug-B13 |
| <b>Method</b>      | ITMS; CID | <b>Genenames</b> | FSIP2                             |

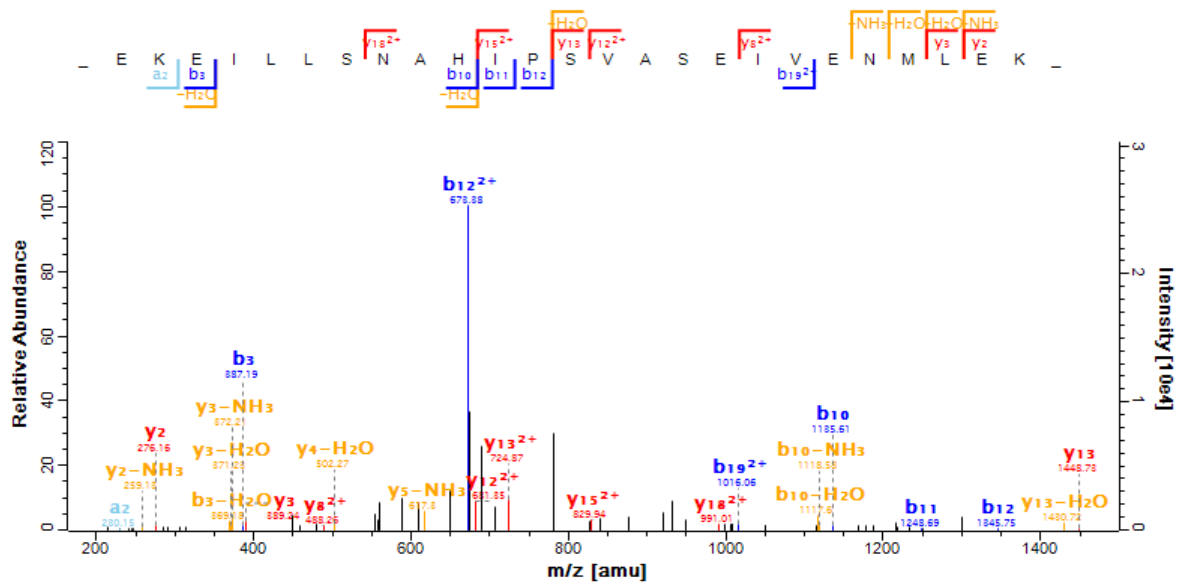



**Protein Group ID:** 1605

**Protein Accession Numbers:** Q96SI1; Q96SI1-2; K7EN63; K7EM48; K7EQS3; K7EPF0; K7EIF1

**Gene Names:** KCTD15

**Peptide Sequence:** SPVSPLAAQGIPLPAQLTK

**Total Number of Spectra:** 1

**Number of Replicates (out of 8):** 1

**Best Match Score:** 101.49

**Best Match Posterior Error Probability:** 0.00012862

**Best Match Spectrum:**

**Scan number** 64085      **Raw file** A549-US-Mock-top20CID-Elite-2ug-B13  
**Method** ITMS; CID      **Genenames** KCTD15

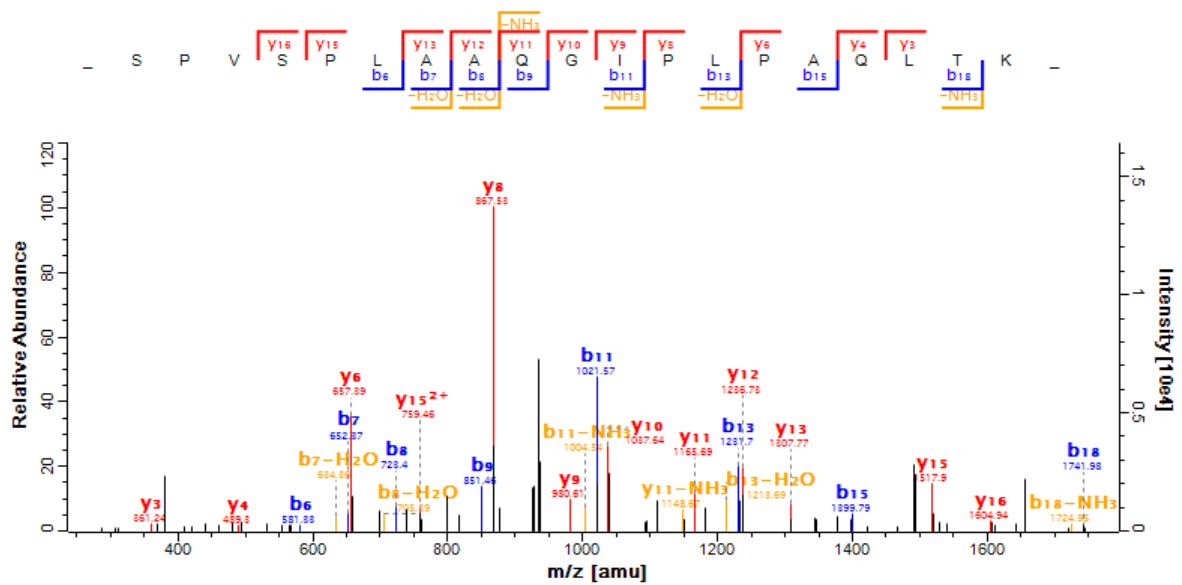

**Protein Group ID:** 1606

**Protein Accession Numbers:** Q8IYT4; Q8IYT4-2; K7EIJ8; K7EM02

**Gene Names:** KATNAL2

**Peptide Sequence:** GLLLYGPPGTGK

**Total Number of Spectra:** 8

**Number of Replicates (out of 8):** 8

**Best Match Score:** 122.7

**Best Match Posterior Error Probability:** 0.00010371

**Best Match Spectrum:**

**Scan number** 42255      **Raw file** A549-US-WT-top20CID-Elite-2ug-B12  
**Method** ITMS; CID      **Genenames** KATNAL2

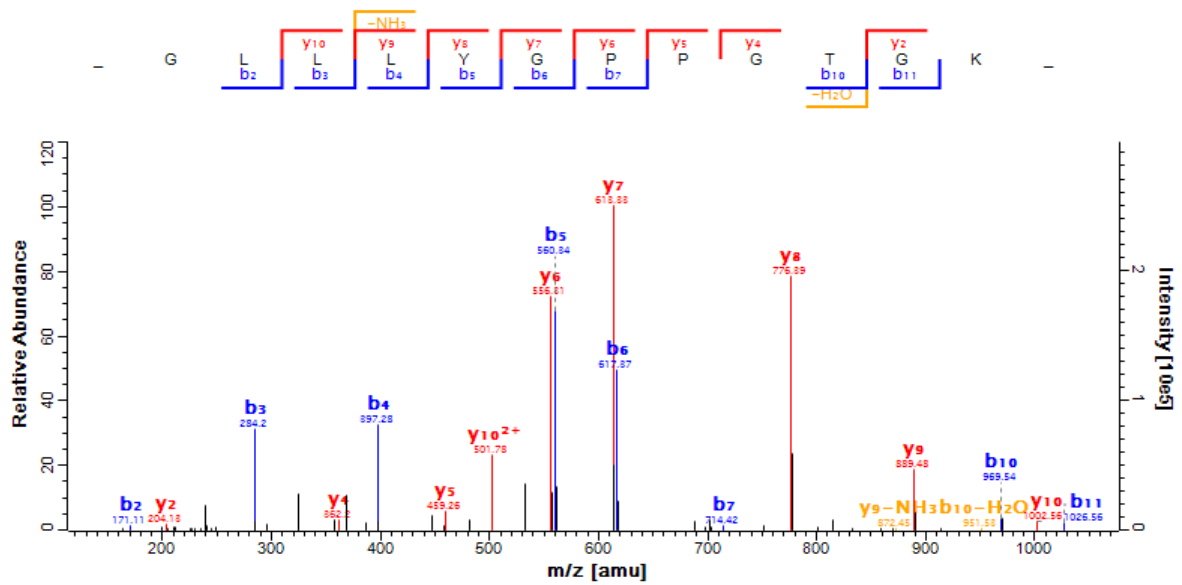





**Protein Group ID:** 1612

**Protein Accession Numbers:** Q6AI08; K7EIX2; K7ELR8

**Gene Names:** HEATR6

**Peptide Sequence:** ESSGEIEAAPVTGTGR

**Total Number of Spectra:** 2

**Number of Replicates (out of 8):** 2

**Best Match Score:** 86.497

**Best Match Posterior Error Probability:** 0.00084114

**Best Match Spectrum:**

**Scan number** 18914      **Raw file** A549-US-Mock-top20CID-Elite-2ug-B14  
**Method** ITMS; CID      **Genenames** HEATR6

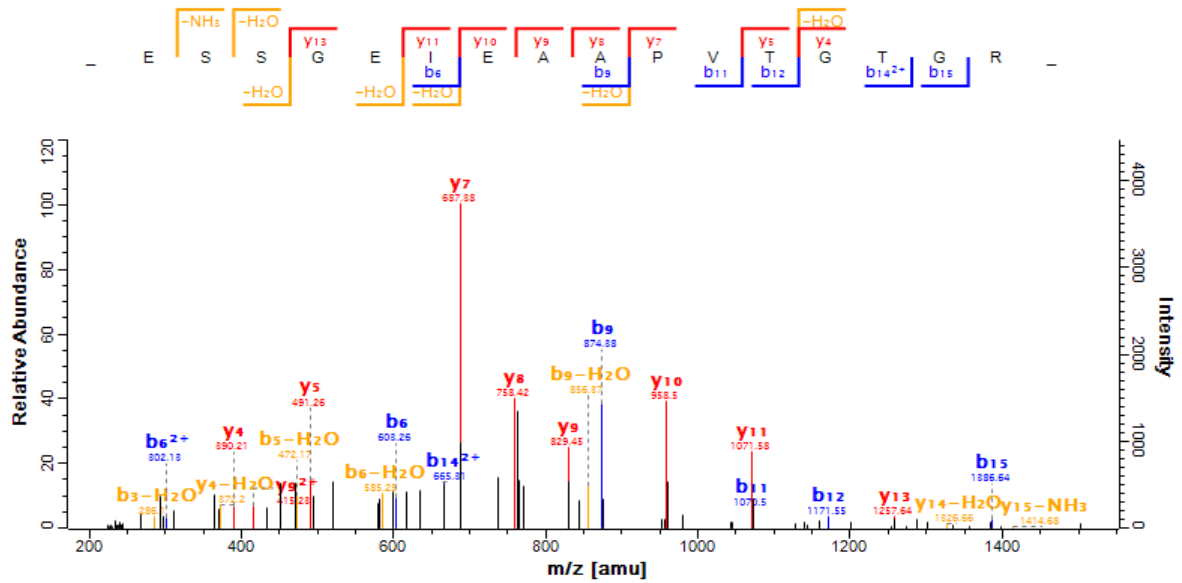

**Protein Group ID:** 1613

**Protein Accession Numbers:** Q6PJF5; Q6PJF5-2; K7EPV3; K7EKI1; K7EQ53; K7EIY3; K7EKA3; K7EQT5; K7EJ10; K7ELA9

**Gene Names:** RHBDF2

**Peptide Sequence:** NGGSVSSVSSSR

**Total Number of Spectra:** 1

**Number of Replicates (out of 8):** 1

**Best Match Score:** 118.76

**Best Match Posterior Error Probability:** 0.00073596

**Best Match Spectrum:**

**Scan number** 4263      **Raw file** A549-US-WT-top20CID-Elite-2ug-B11  
**Method** ITMS: CID      **Genenames** RHBDF2

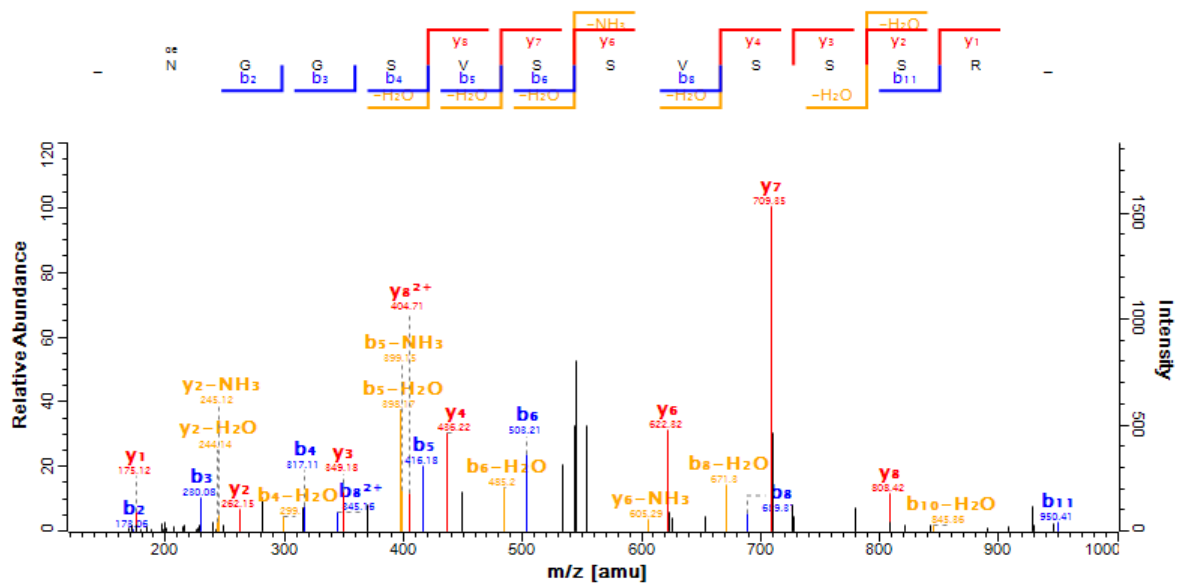

**Protein Group ID:** 1614

**Protein Accession Numbers:** K7EJ20; P36969; K7EKX7; P36969-2; K7ENB4; K7ERP4

**Gene Names:** GPX4

**Peptide Sequence:** DIDGHMVNLDK

**Total Number of Spectra:** 1

**Number of Replicates (out of 8):** 1

**Best Match Score:** 136.53

**Best Match Posterior Error Probability:** 3.36E-05

**Best Match Spectrum:**

**Scan number** 26623      **Raw file** A549-US-Mock-top20CID-Elite-2ug-B12  
**Method** ITMS; CID      **Genenames** GPX4

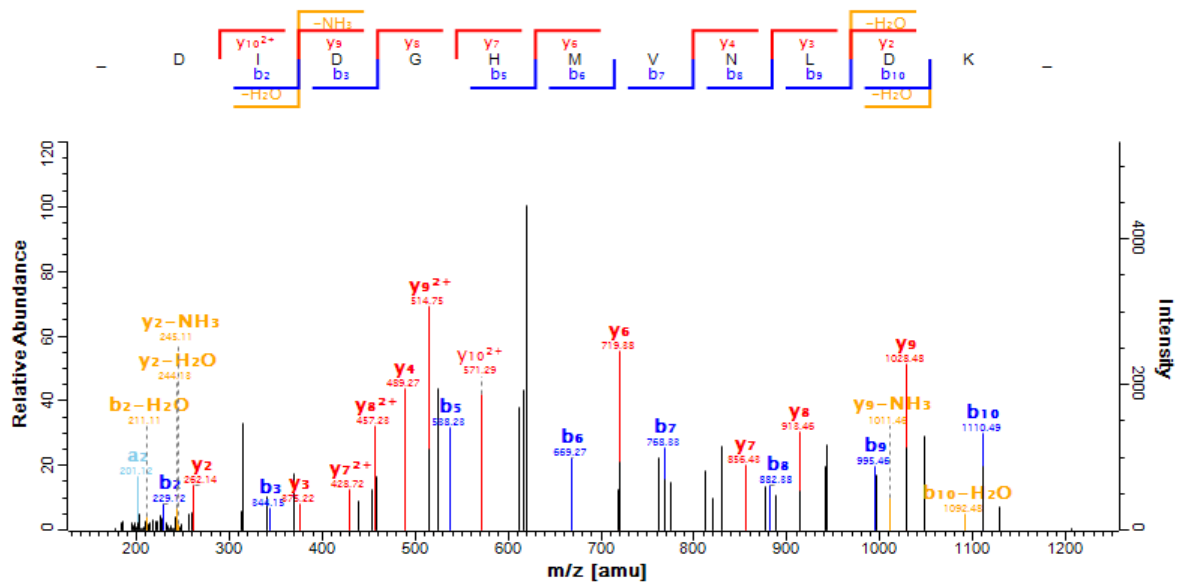

**Protein Group ID:** 1615

**Protein Accession Numbers:** Q86VR2; K7EQI9; K7EJ42; K7EPD0

**Gene Names:** FAM134C

**Peptide Sequence:** VPRPDALDNESWGFVHPR

**Total Number of Spectra:** 7

**Number of Replicates (out of 8):** 6

**Best Match Score:** 128.71

**Best Match Posterior Error Probability:** 0.00019335

**Best Match Spectrum:**

|                    |           |                  |                                   |
|--------------------|-----------|------------------|-----------------------------------|
| <b>Scan number</b> | 48627     | <b>Raw file</b>  | A549-US-WT-top20CID-Elite-2ug-B14 |
| <b>Method</b>      | ITMS; CID | <b>Genenames</b> | FAM134C                           |

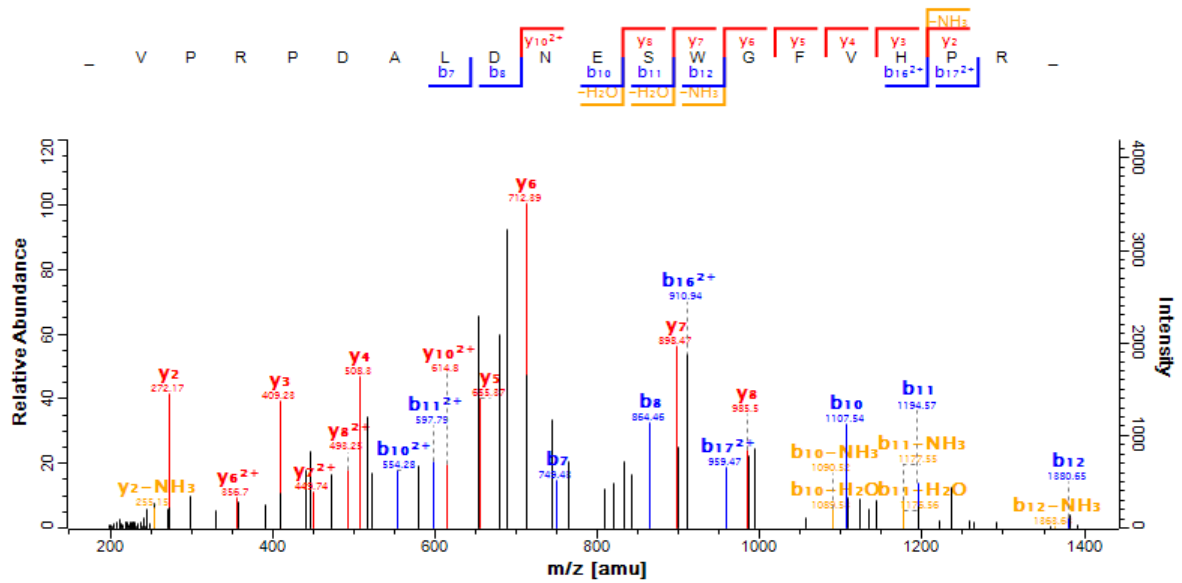



**Protein Group ID:** 1617

**Protein Accession Numbers:** Q13111; Q13111-3; Q13111-2; K7EJF1

**Gene Names:** CHAF1A

**Peptide Sequence:** GKADDMSDDQGTSVQSK

**Total Number of Spectra:** 1

**Number of Replicates (out of 8):** 1

**Best Match Score:** 93.226

**Best Match Posterior Error Probability:** 0.0015502

**Best Match Spectrum:**

|                    |           |                  |                                   |
|--------------------|-----------|------------------|-----------------------------------|
| <b>Scan number</b> | 4281      | <b>Raw file</b>  | A549-US-WT-top20CID-Elite-2ug-B11 |
| <b>Method</b>      | ITMS; CID | <b>Genenames</b> | CHAF1A                            |

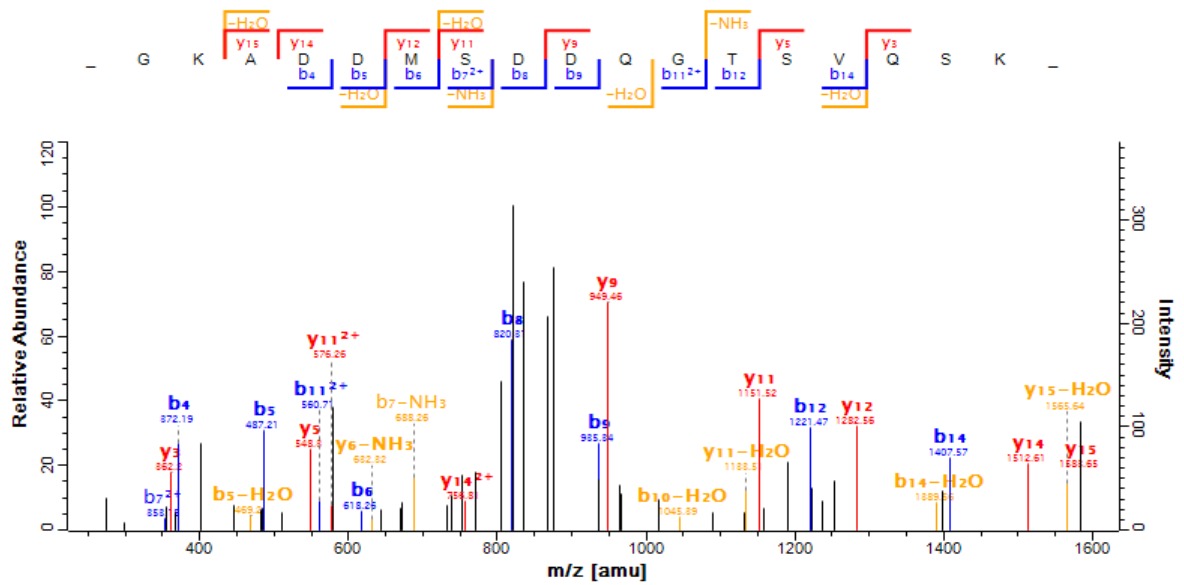

**Protein Group ID:** 1619

**Protein Accession Numbers:** Q6P1N0; Q6P1N0-2; K7EJY5

**Gene Names:** CC2D1A

**Peptide Sequence:** GPASTPTYSPAPTQPAPR

**Total Number of Spectra:** 1

**Number of Replicates (out of 8):** 1

**Best Match Score:** 106.28

**Best Match Posterior Error Probability:** 0.00010039

**Best Match Spectrum:**

**Scan number** 20645      **Raw file** A549-US-Mock-top20CID-Elite-2ug-B11  
**Method** ITMS; CID      **Genenames** CC2D1A

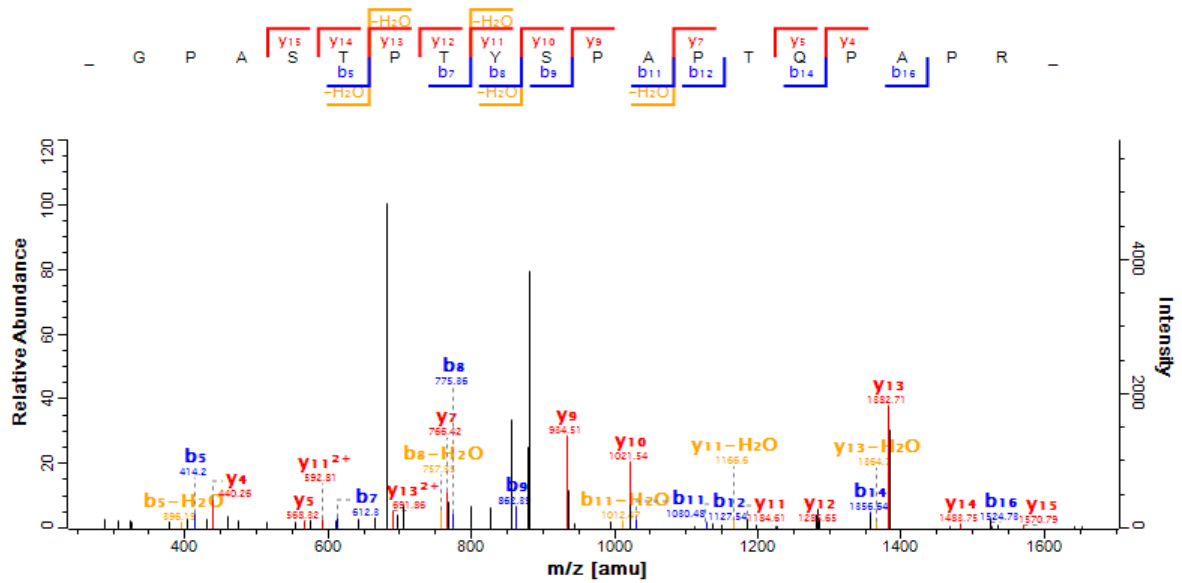

**Protein Group ID:** 1620

**Protein Accession Numbers:** Q96ND0; K7EK00; K7ERQ2

**Gene Names:** FAM210A

**Peptide Sequence:** KEEPDPPLQDK

**Total Number of Spectra:** 4

**Number of Replicates (out of 8):** 4

**Best Match Score:** 112.83

**Best Match Posterior Error Probability:** 0.00063548

**Best Match Spectrum:**

**Scan number** 10056      **Raw file** A549-US-WT-top20CID-Elite-2ug-B12  
**Method** ITMS; CID      **Genenames** FAM210A

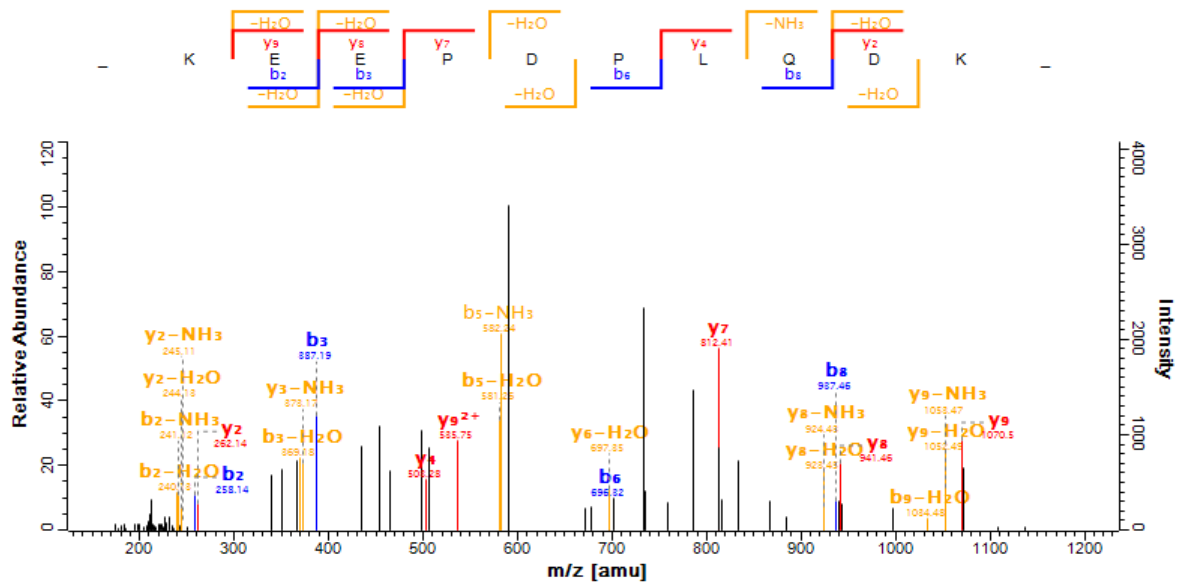

**Protein Group ID:** 1621

**Protein Accession Numbers:** P84243; K7EK07

**Gene Names:** H3F3A

**Peptide Sequence:** FQSAAAGALQEASYLEVGLFEDTNLC A I H A K

**Total Number of Spectra:** 18

**Number of Replicates (out of 8):** 8

**Best Match Score:** 167.67

**Best Match Posterior Error Probability:** 1.25E-55

**Best Match Spectrum:**

**Scan number** 92614      **Raw file** A549-US-Mock-top20CID-Elite-2ug-B13  
**Method** ITMS; CID      **Genenames** H3F3A

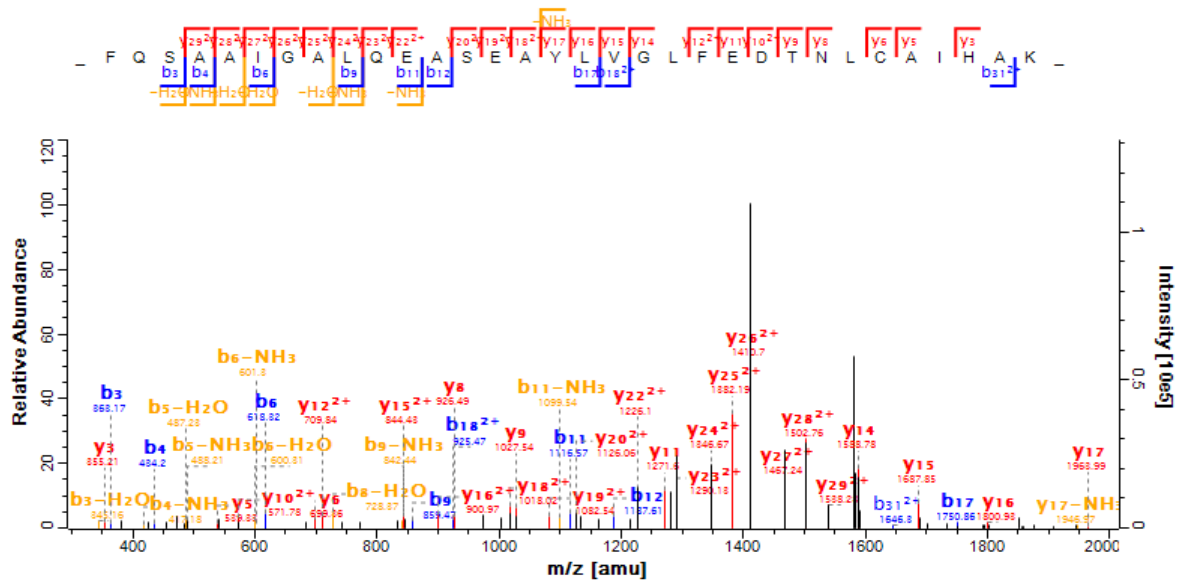

**Protein Group ID:** 1624

**Protein Accession Numbers:** Q92947; Q92947-2; K7ERX1; K7EKH1; K7ES74

**Gene Names:** GCDH

**Peptide Sequence:** SSRPEFDWQDPLVLEEQLTTEILIR

**Total Number of Spectra:** 3

**Number of Replicates (out of 8):** 3

**Best Match Score:** 107.03

**Best Match Posterior Error Probability:** 1.35E-07

**Best Match Spectrum:**

**Scan number** 88016      **Raw file** A549-US-Mock-top20CID-Elite-2ug-B11  
**Method** ITMS; CID      **Genenames** GCDH

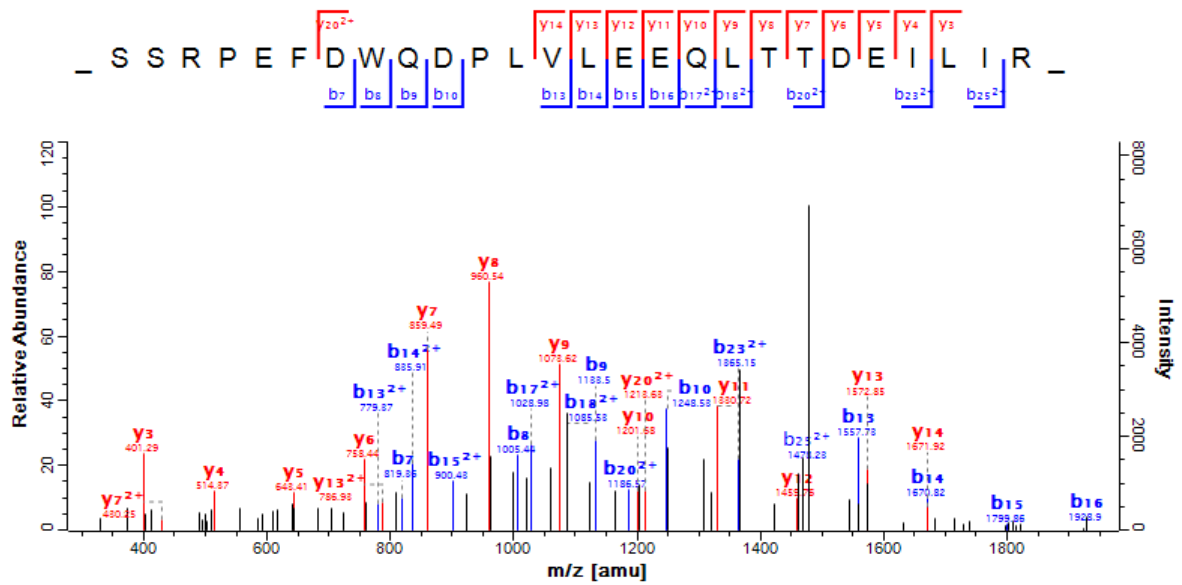

**Protein Group ID:** 1625  
**Protein Accession Numbers:** K7EKI0; Q92817  
**Gene Names:** EVPL  
**Peptide Sequence:** MQANADQVER  
**Total Number of Spectra:** 1  
**Number of Replicates (out of 8):** 1  
**Best Match Score:** 84.658  
**Best Match Posterior Error Probability:** 0.003286  
**Best Match Spectrum:**

**Scan number** 6992      **Raw file** A549-US-Mock-top20CID-Elite-2ug-B12  
**Method** ITMS; CID      **Genenames** EVPL

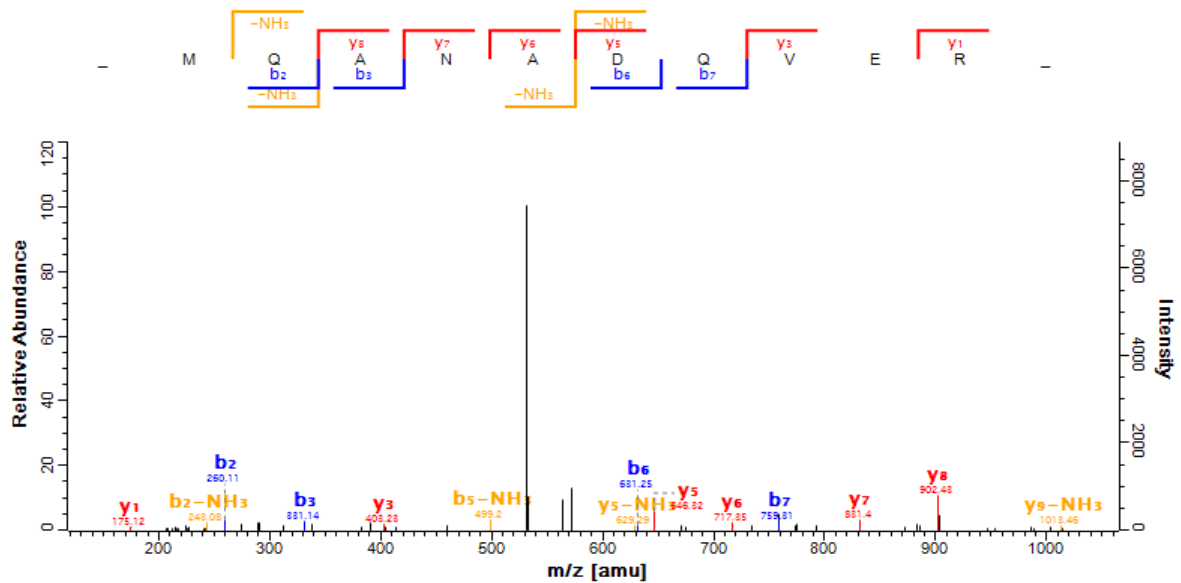

**Protein Group ID:** 1626

**Protein Accession Numbers:** O60437; K7EKI8; K7EQ71

**Gene Names:** PPL

**Peptide Sequence:** VVLQQDPQAR

**Total Number of Spectra:** 2

**Number of Replicates (out of 8):** 2

**Best Match Score:** 127.87

**Best Match Posterior Error Probability:** 4.28E-05

**Best Match Spectrum:**

|                    |           |                  |                                     |
|--------------------|-----------|------------------|-------------------------------------|
| <b>Scan number</b> | 11888     | <b>Raw file</b>  | A549-US-Mock-top20CID-Elite-2ug-B13 |
| <b>Method</b>      | ITMS; CID | <b>Genenames</b> | PPL                                 |

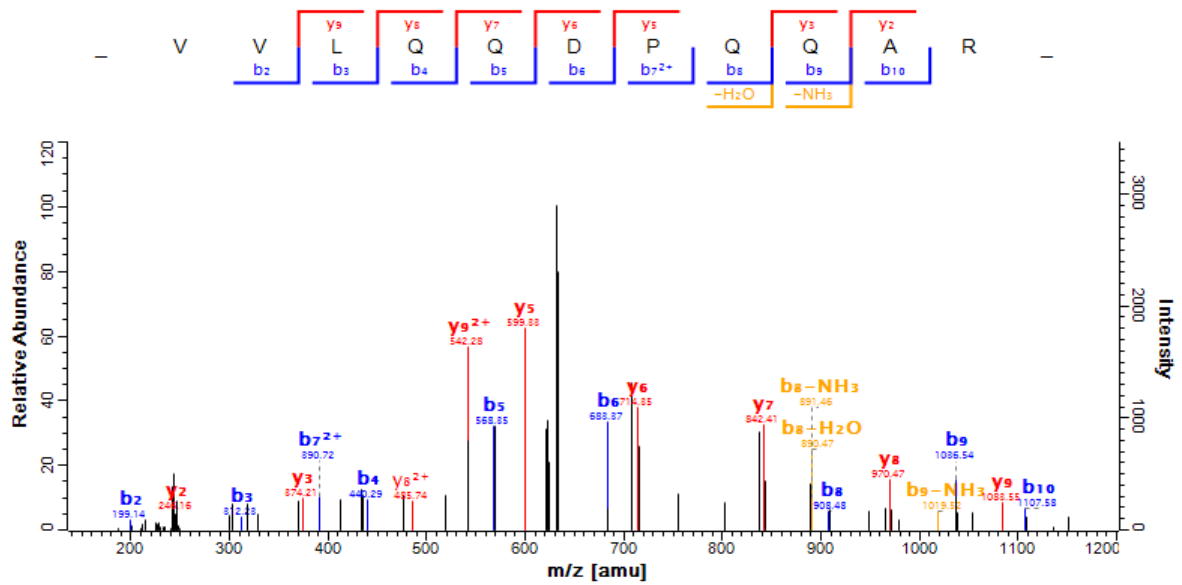

**Protein Group ID:** 1632

**Protein Accession Numbers:** Q53F19; Q53F19-2; K7ELP6

**Gene Names:** C17orf85

**Peptide Sequence:** APGAEEDDSELQR

**Total Number of Spectra:** 9

**Number of Replicates (out of 8):** 7

**Best Match Score:** 181.98

**Best Match Posterior Error Probability:** 9.81E-18

**Best Match Spectrum:**

**Scan number** 11084      **Raw file** A549-US-WT-top20CID-Elite-2ug-B13  
**Method** ITMS; CID      **Genenames** C17orf85

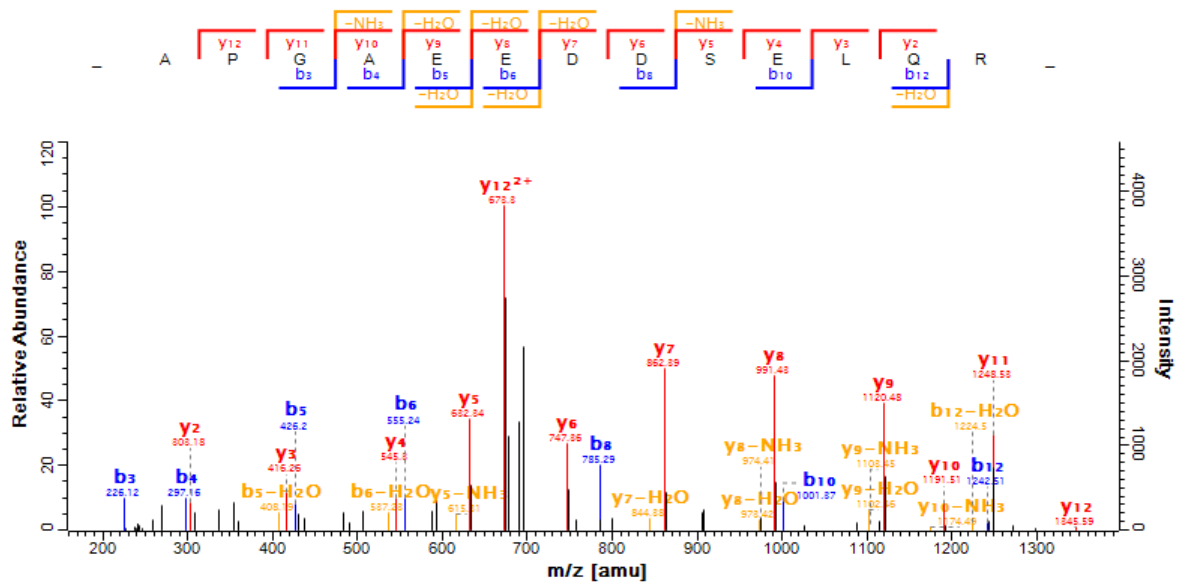



**Protein Group ID:** 1636

**Protein Accession Numbers:** Q14457; K7ER46; K7EMA2

**Gene Names:** BECN1

**Peptide Sequence:** TQFNSEEQWTK

**Total Number of Spectra:** 1

**Number of Replicates (out of 8):** 1

**Best Match Score:** 89.43

**Best Match Posterior Error Probability:** 0.0015369

**Best Match Spectrum:**

**Scan number** 25533      **Raw file** A549-US-WT-top20CID-Elite-2ug-B11  
**Method** ITMS; CID      **Genenames** BECN1

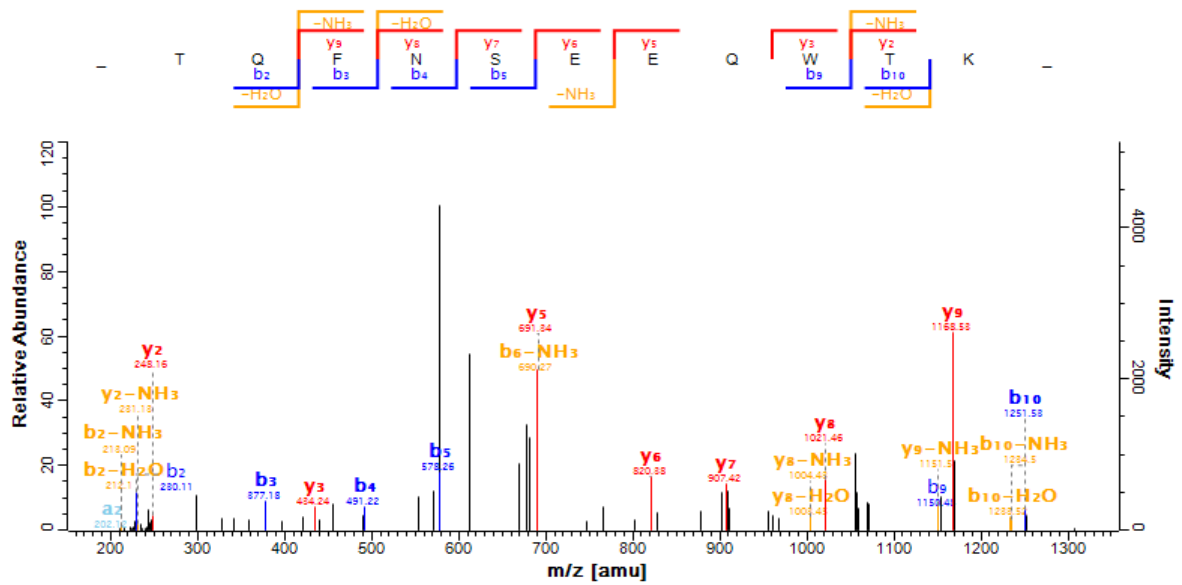

**Protein Group ID:** 1638

**Protein Accession Numbers:** O75298; Q7RTN0; K7EMR7

**Gene Names:** RTN2

**Peptide Sequence:** TSLLAVYK

**Total Number of Spectra:** 5

**Number of Replicates (out of 8):** 5

**Best Match Score:** 120.15

**Best Match Posterior Error Probability:** 0.00041533

**Best Match Spectrum:**

|                    |           |                  |                                     |
|--------------------|-----------|------------------|-------------------------------------|
| <b>Scan number</b> | 58542     | <b>Raw file</b>  | A549-US-Mock-top20CID-Elite-2ug-B11 |
| <b>Method</b>      | ITMS; CID | <b>Genenames</b> | RTN2                                |

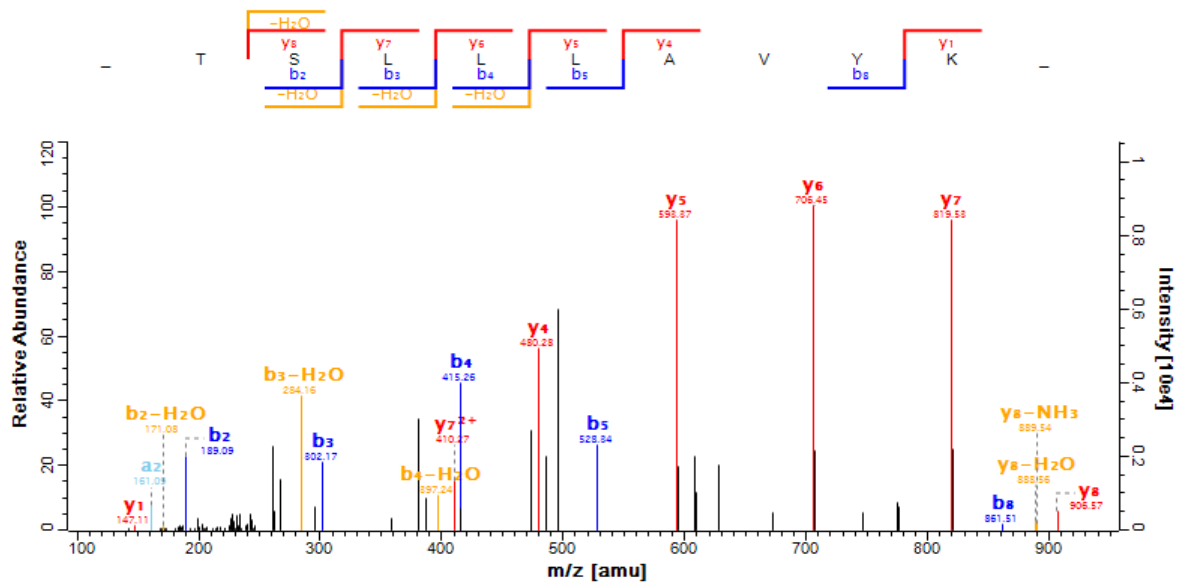

**Protein Group ID:** 1640

**Protein Accession Numbers:** K7EMV4; K7EQ44; K7EPC8; P60002; K7EN05

**Gene Names:** ELOF1

**Peptide Sequence:** MTGTLETQFTCPFNHEK

**Total Number of Spectra:** 1

**Number of Replicates (out of 8):** 1

**Best Match Score:** 77.42

**Best Match Posterior Error Probability:** 0.0015252

**Best Match Spectrum:**

**Scan number** 46924      **Raw file** A549-US-Mock-top20CID-Elite-2ug-B11  
**Method** ITMS; CID      **Genenames** ELOF1

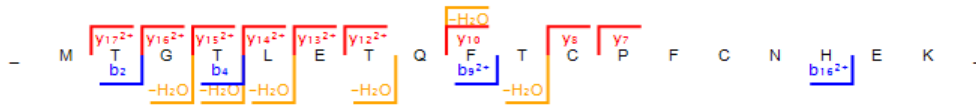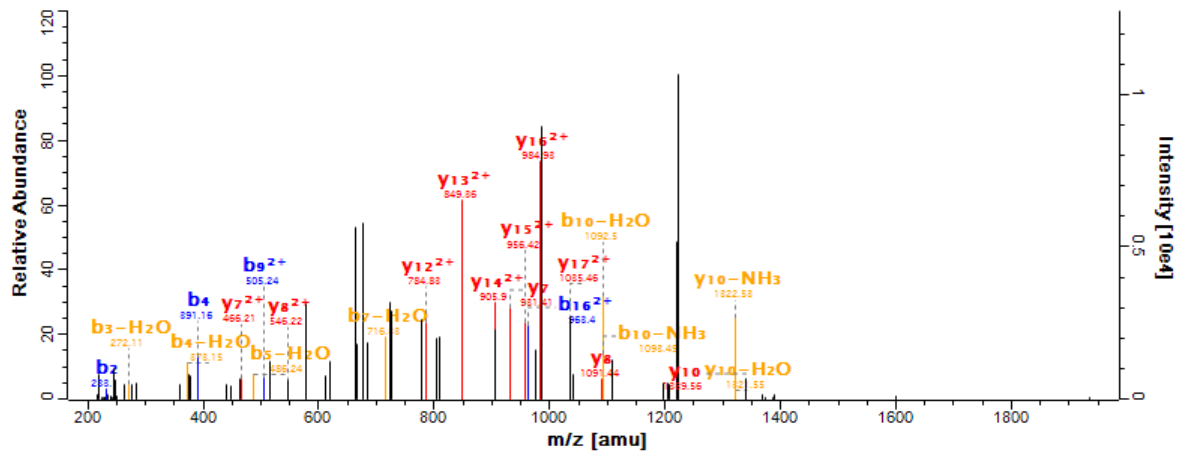

**Protein Group ID:** 1642

**Protein Accession Numbers:** Q8N2U0; K7ERE1; K7ENI6

**Gene Names:** C17orf61

**Peptide Sequence:** LGALSGAAALGFASYGAHGAQFPDAGYK

**Total Number of Spectra:** 14

**Number of Replicates (out of 8):** 8

**Best Match Score:** 122.47

**Best Match Posterior Error Probability:** 3.97E-18

**Best Match Spectrum:**

**Scan number** 66603      **Raw file** A549-US-WT-top20CID-Elite-2ug-B14  
**Method** ITMS; CID      **Genenames** C17orf61

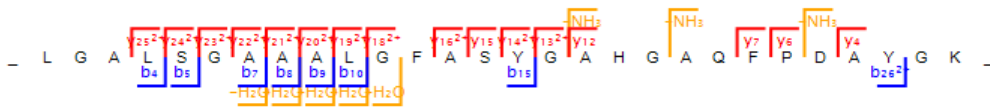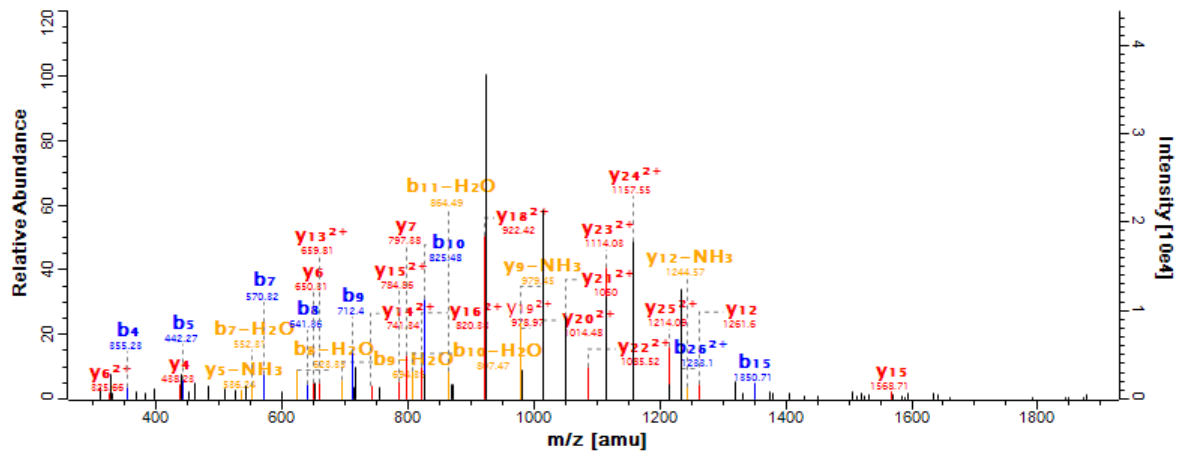



**Protein Group ID:** 1647  
**Protein Accession Numbers:** Q96C10; K7EPP0  
**Gene Names:** DHX58  
**Peptide Sequence:** ELINEALETLMEQAVAAVQK  
**Total Number of Spectra:** 1  
**Number of Replicates (out of 8):** 1  
**Best Match Score:** 105.9  
**Best Match Posterior Error Probability:** 5.30E-05  
**Best Match Spectrum:**

**Scan number** 95695      **Raw file** A549-US-WT-top20CID-Elite-2ug-B13  
**Method** ITMS; CID      **Genenames** DHX58

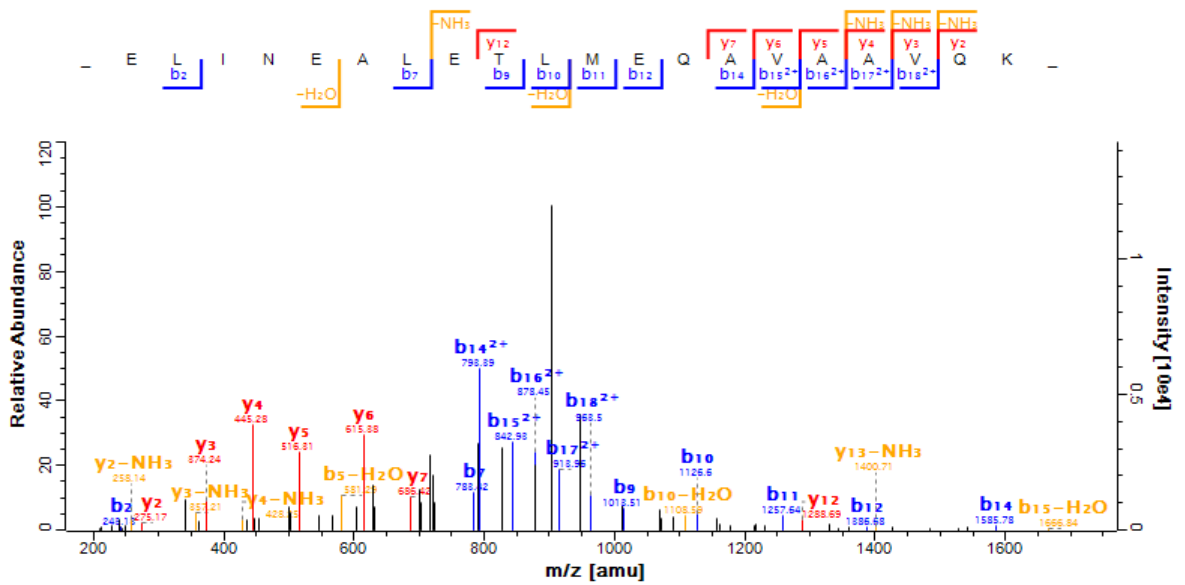

**Protein Group ID:** 1650

**Protein Accession Numbers:** Q17RN3; Q17RN3-2; K7EQT7; K7EQL1

**Gene Names:** FAM98C

**Peptide Sequence:** EAGAEVLSAGDGPGAEEDFLR

**Total Number of Spectra:** 4

**Number of Replicates (out of 8):** 4

**Best Match Score:** 196.3

**Best Match Posterior Error Probability:** 3.29E-36

**Best Match Spectrum:**

|                    |           |                  |                                     |
|--------------------|-----------|------------------|-------------------------------------|
| <b>Scan number</b> | 53577     | <b>Raw file</b>  | A549-US-Mock-top20CID-Elite-2ug-B12 |
| <b>Method</b>      | ITMS; CID | <b>Genenames</b> | FAM98C                              |

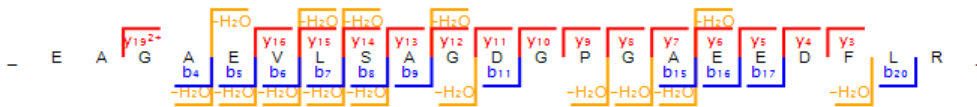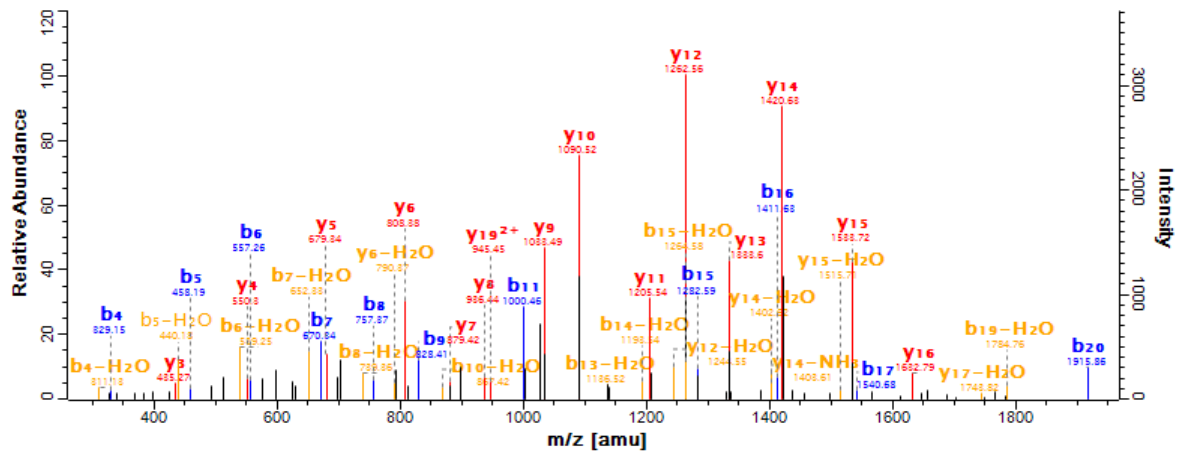

**Protein Group ID:** 1654

**Protein Accession Numbers:** O95633; O95633-2; K7ES54

**Gene Names:** FSTL3

**Peptide Sequence:** DSCDGVCEGPGK

**Total Number of Spectra:** 1

**Number of Replicates (out of 8):** 1

**Best Match Score:** 80.014

**Best Match Posterior Error Probability:** 0.0033637

**Best Match Spectrum:**

**Scan number** 4391      **Raw file** A549-US-WT-top20CID-Elite-2ug-B11  
**Method** ITMS; CID      **Genenames** FSTL3

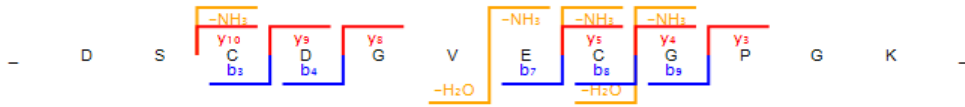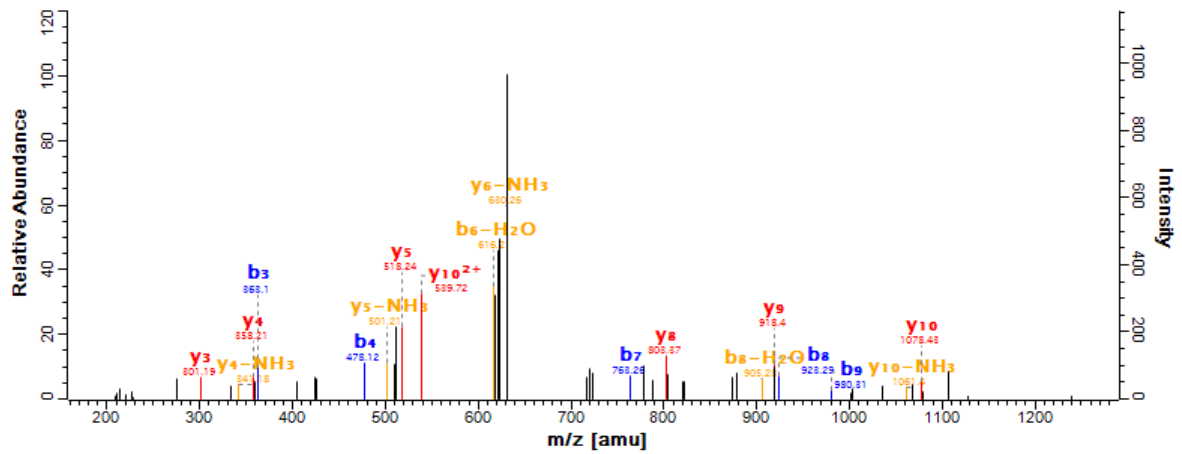



**Protein Group ID:** 1667  
**Protein Accession Numbers:** O00204; O00204-2  
**Gene Names:** SULT2B1  
**Peptide Sequence:** LMSSHLPIQIFTK  
**Total Number of Spectra:** 4  
**Number of Replicates (out of 8):** 4  
**Best Match Score:** 88.021  
**Best Match Posterior Error Probability:** 0.0015942  
**Best Match Spectrum:**

**Scan number** 57675      **Raw file** A549-US-Mock-top20CID-Elite-2ug-B14  
**Method** ITMS; CID      **Genenames** SULT2B1

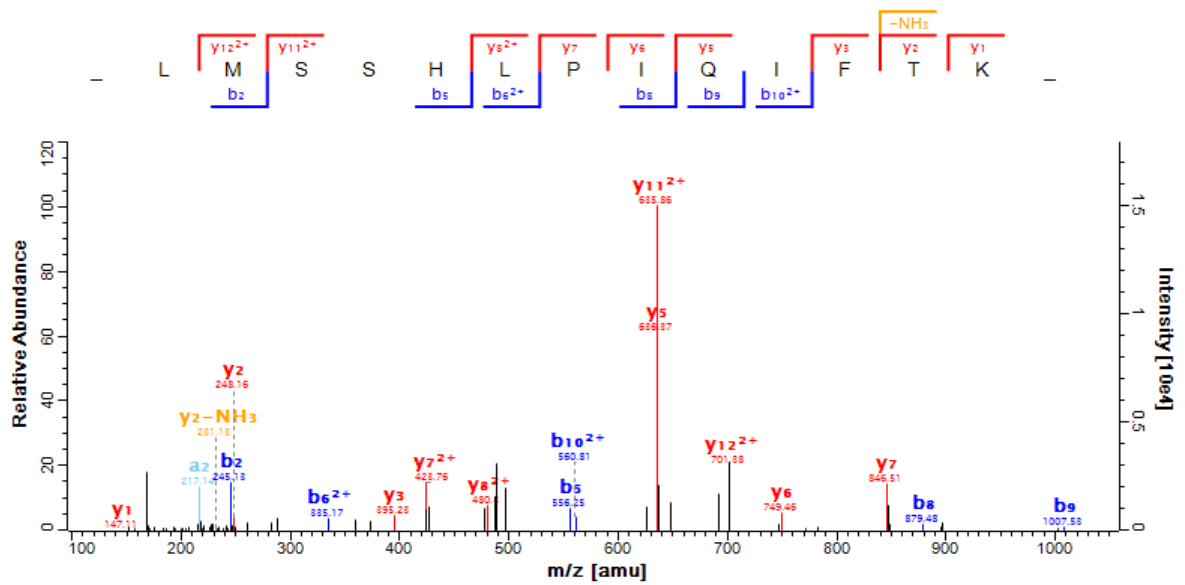

**Protein Group ID:** 1674  
**Protein Accession Numbers:** O00268; Q5TBP5  
**Gene Names:** TAF4  
**Peptide Sequence:** HGITELHPDVVSYVSHATQQR  
**Total Number of Spectra:** 1  
**Number of Replicates (out of 8):** 1  
**Best Match Score:** 71.872  
**Best Match Posterior Error Probability:** 0.0010618  
**Best Match Spectrum:**

**Scan number** 45222      **Raw file** A549-US-Mock-top20CID-Elite-2ug-B14  
**Method** ITMS; CID      **Genenames** TAF4

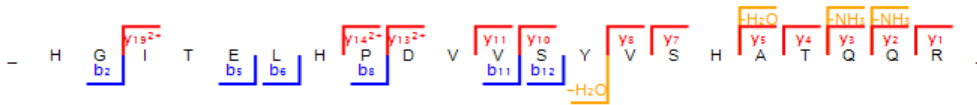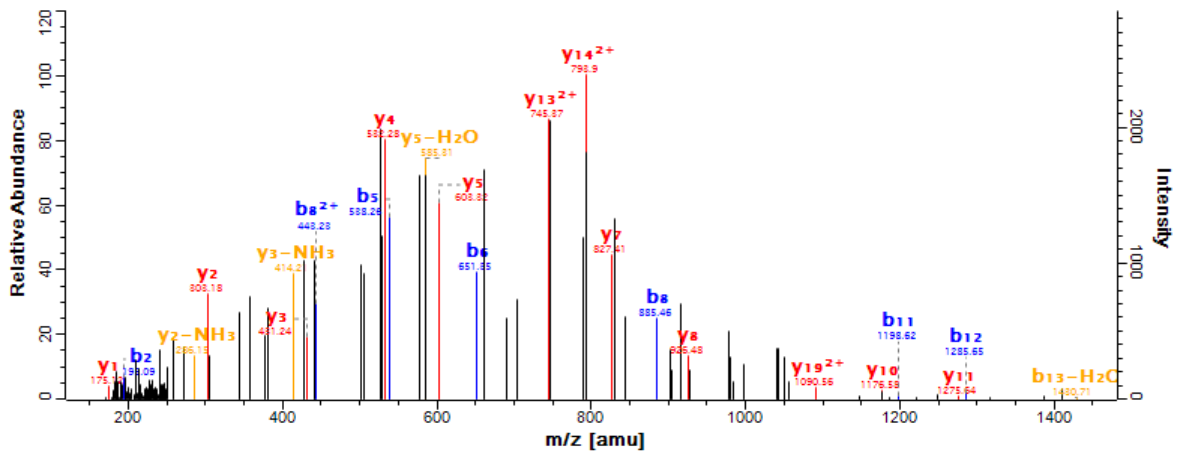

**Protein Group ID:** 1695  
**Protein Accession Numbers:** O00507  
**Gene Names:** USP9Y  
**Peptide Sequence:** IEDCSNSEDTIK  
**Total Number of Spectra:** 2  
**Number of Replicates (out of 8):** 2  
**Best Match Score:** 116.24  
**Best Match Posterior Error Probability:** 0.00021059  
**Best Match Spectrum:**

**Scan number** 12547      **Raw file** A549-US-WT-top20CID-Elite-2ug-B12  
**Method** ITMS; CID      **Genenames** USP9Y

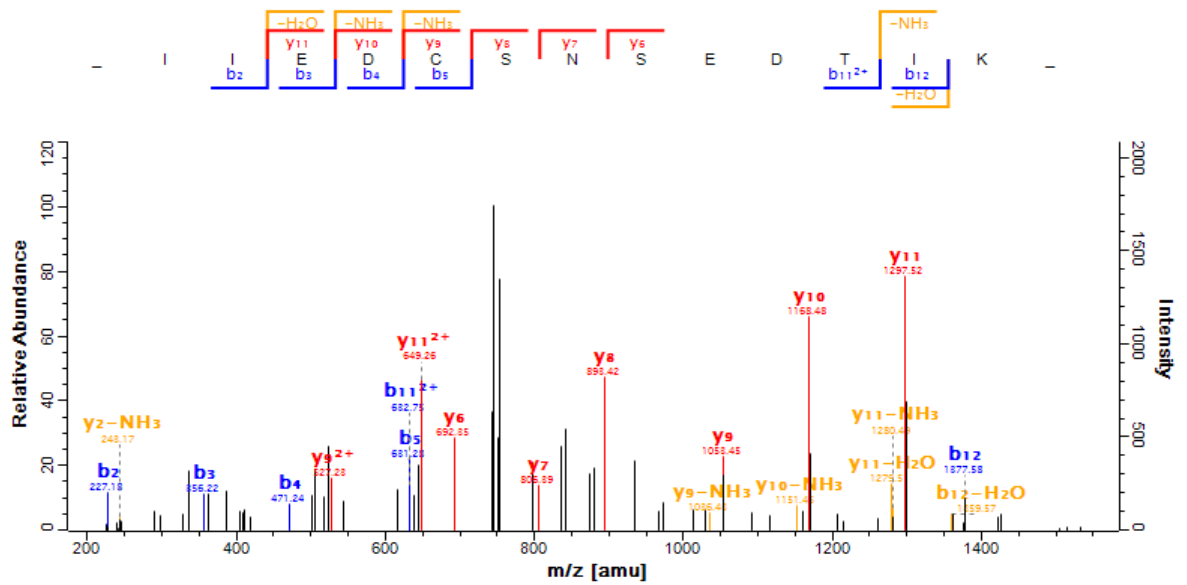

**Protein Group ID:** 1711  
**Protein Accession Numbers:** O14613  
**Gene Names:** CDC42EP2  
**Peptide Sequence:** FHLLPGTMVEGPEEDGTDFDLPFQFTR  
**Total Number of Spectra:** 3  
**Number of Replicates (out of 8):** 2  
**Best Match Score:** 130.37  
**Best Match Posterior Error Probability:** 2.23E-16  
**Best Match Spectrum:**

**Scan number** 88510      **Raw file** A549-US-WT-top20CID-Elite-2ug-B11  
**Method** ITMS; CID      **Genenames** CDC42EP2

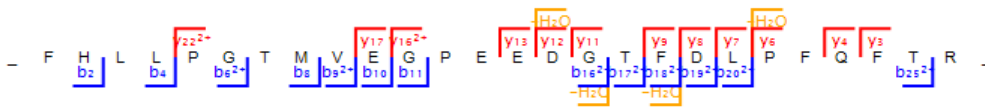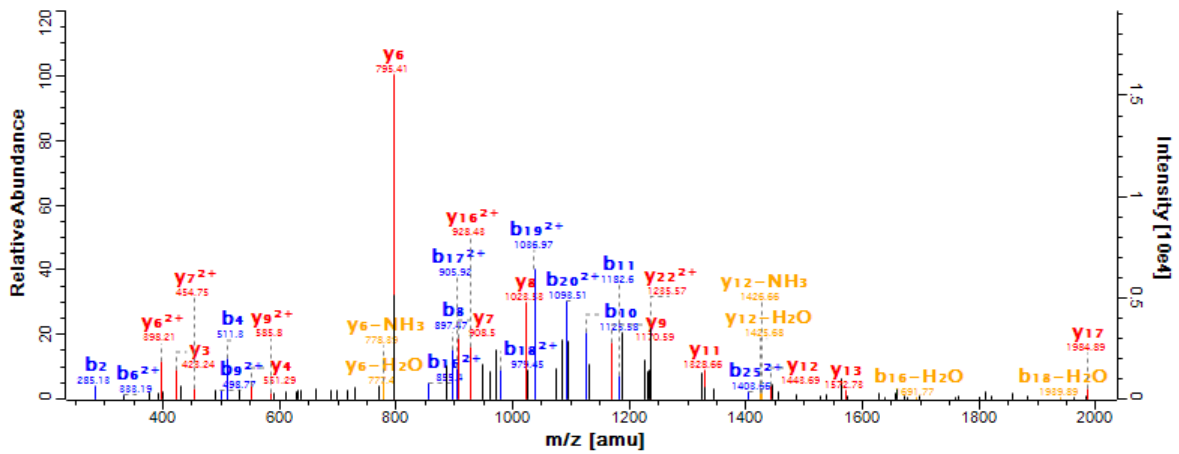

**Protein Group ID:** 1713  
**Protein Accession Numbers:** O14625  
**Gene Names:** CXCL11  
**Peptide Sequence:** ASIMYPSNNCDK  
**Total Number of Spectra:** 1  
**Number of Replicates (out of 8):** 1  
**Best Match Score:** 80.69  
**Best Match Posterior Error Probability:** 0.0032094  
**Best Match Spectrum:**

**Scan number** 17619      **Raw file** A549-US-WT-top20CID-Elite-2ug-B11  
**Method** ITMS; CID      **Genenames** CXCL11

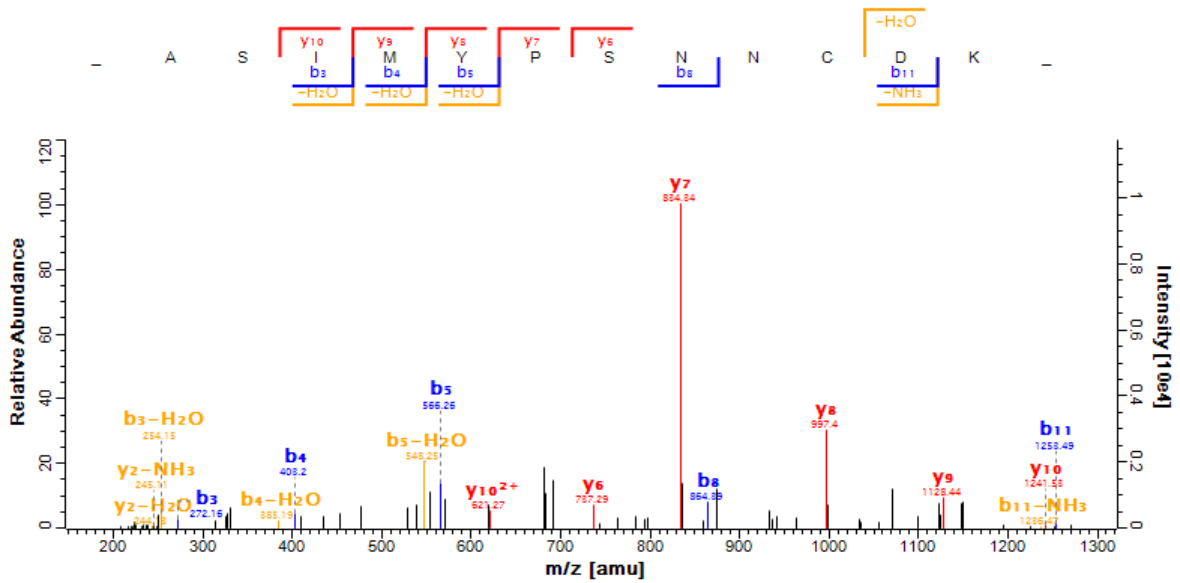

**Protein Group ID:** 1715

**Protein Accession Numbers:** O14647; O14647-2; B7Z3I4; O14647-3; G3V4S8

**Gene Names:** CHD2

**Peptide Sequence:** MWEEYDPVYGVGR

**Total Number of Spectra:** 3

**Number of Replicates (out of 8):** 3

**Best Match Score:** 96.604

**Best Match Posterior Error Probability:** 0.00076716

**Best Match Spectrum:**

|                    |           |                  |                                   |
|--------------------|-----------|------------------|-----------------------------------|
| <b>Scan number</b> | 51070     | <b>Raw file</b>  | A549-US-WT-top20CID-Elite-2ug-B13 |
| <b>Method</b>      | ITMS; CID | <b>Genenames</b> | CHD2                              |

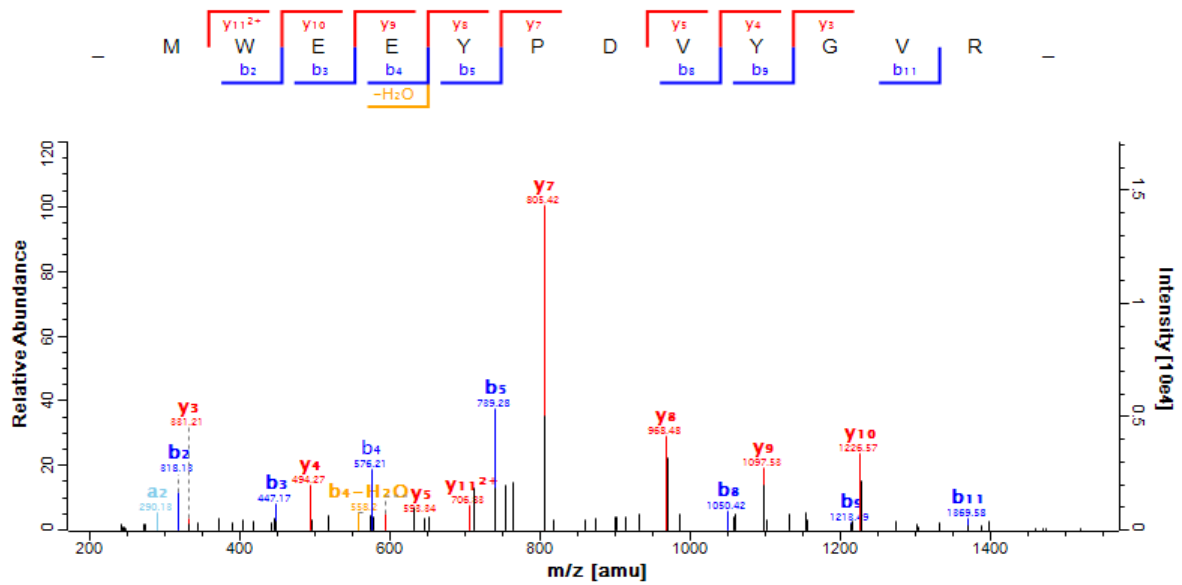

**Protein Group ID:** 1718

**Protein Accession Numbers:** O14684

**Gene Names:** PTGES

**Peptide Sequence:** SVTYTLAQLPCASMLQILWVWELAAAR

**Total Number of Spectra:** 1

**Number of Replicates (out of 8):** 1

**Best Match Score:** 63.706

**Best Match Posterior Error Probability:** 0.0010064

**Best Match Spectrum:**

**Scan number** 94637      **Raw file** A549-US-WT-top20CID-Elite-2ug-B14  
**Method** ITMS; CID      **Genenames** PTGES

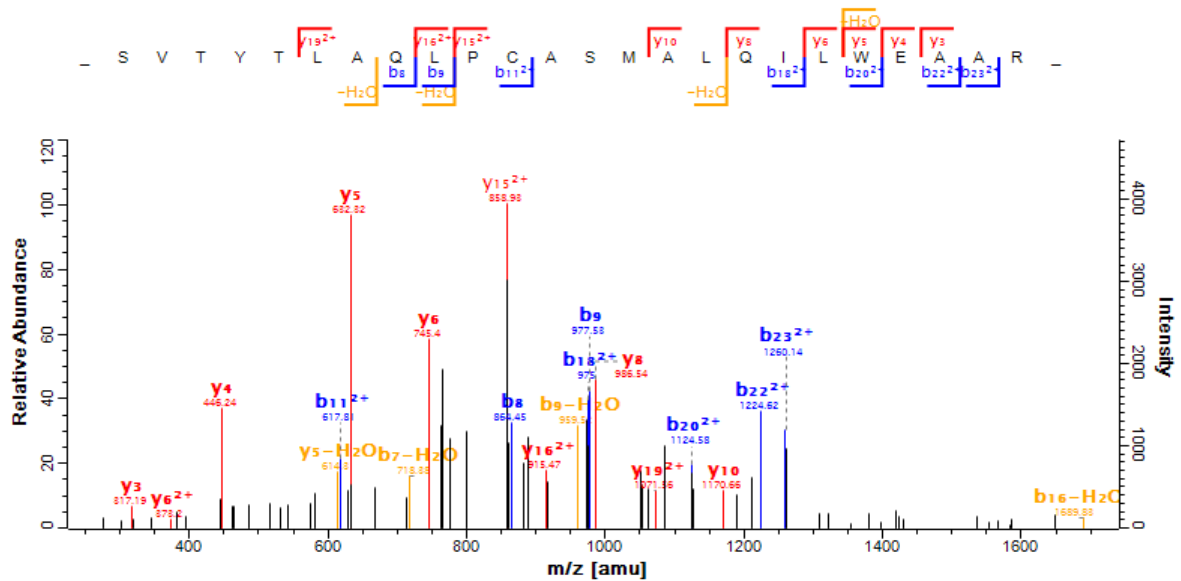

**Protein Group ID:** 1719

**Protein Accession Numbers:** O14715; Q99666; J3KQ37; F8W705; Q99666-2

**Gene Names:** RGP8;RGP5

**Peptide Sequence:** QMLNSVMQELEDYSEGGPLYK

**Total Number of Spectra:** 2

**Number of Replicates (out of 8):** 2

**Best Match Score:** 122.44

**Best Match Posterior Error Probability:** 4.23E-07

**Best Match Spectrum:**

**Scan number** 86298      **Raw file** A549-US-Mock-top20CID-Elite-2ug-B11  
**Method** ITMS; CID      **Genenames** RGP8;RGP5

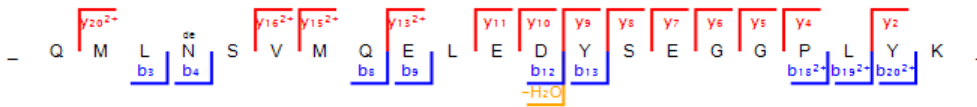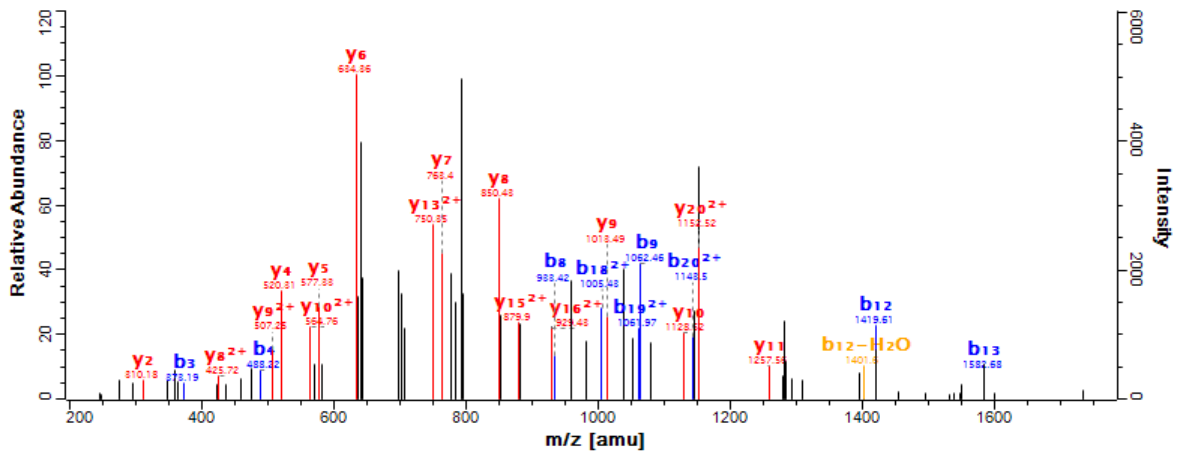



**Protein Group ID:** 1720

**Protein Accession Numbers:** O14727; O14727-2; O14727-4; O14727-3

**Gene Names:** APAF1

**Peptide Sequence:** IWSFDLLLPLHELRL

**Total Number of Spectra:** 1

**Number of Replicates (out of 8):** 1

**Best Match Score:** 78.324

**Best Match Posterior Error Probability:** 0.0036605

**Best Match Spectrum:**

**Scan number** 90371      **Raw file** A549-US-WT-top20CID-Elite-2ug-B14  
**Method** ITMS; CID      **Genenames** APAF1

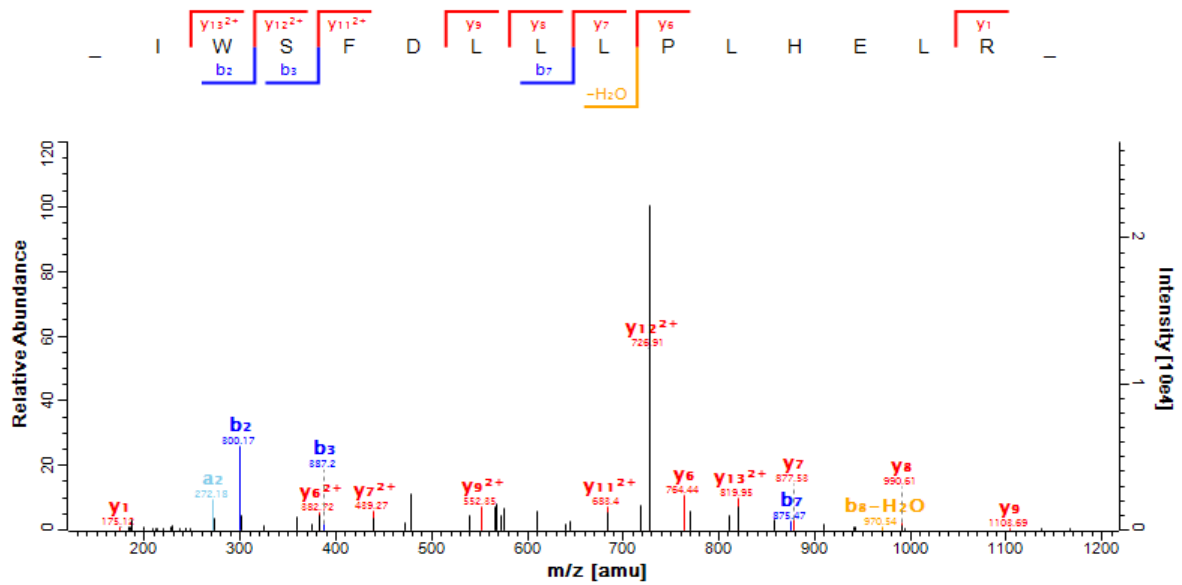

**Protein Group ID:** 1724  
**Protein Accession Numbers:** O14756; O75452  
**Gene Names:** HSD17B6;RDH16  
**Peptide Sequence:** YSAGWDAK  
**Total Number of Spectra:** 2  
**Number of Replicates (out of 8):** 2  
**Best Match Score:** 106.42  
**Best Match Posterior Error Probability:** 0.0037968  
**Best Match Spectrum:**

|                    |           |                  |                                   |
|--------------------|-----------|------------------|-----------------------------------|
| <b>Scan number</b> | 13353     | <b>Raw file</b>  | A549-US-WT-top20CID-Elite-2ug-B13 |
| <b>Method</b>      | ITMS; CID | <b>Genenames</b> | HSD17B6;RDH16                     |

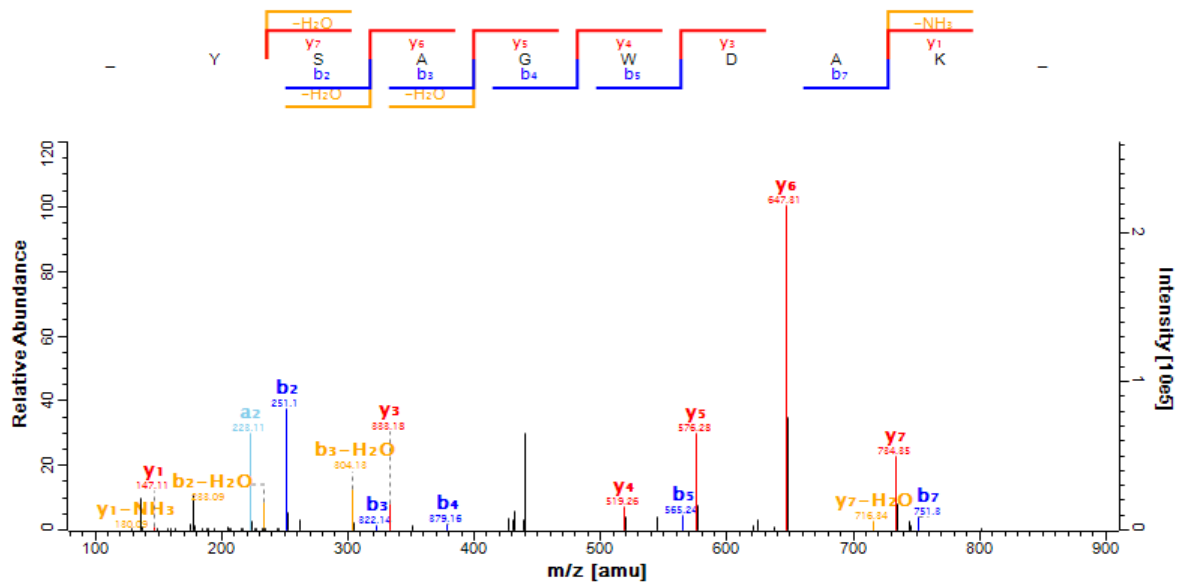

**Protein Group ID:** 1729  
**Protein Accession Numbers:** O14787-2; O14787  
**Gene Names:** TNPO2  
**Peptide Sequence:** YSEIDIILLK  
**Total Number of Spectra:** 2  
**Number of Replicates (out of 8):** 2  
**Best Match Score:** 99.568  
**Best Match Posterior Error Probability:** 0.00080511  
**Best Match Spectrum:**

|                    |           |                  |                                     |
|--------------------|-----------|------------------|-------------------------------------|
| <b>Scan number</b> | 65543     | <b>Raw file</b>  | A549-US-Mock-top20CID-Elite-2ug-B14 |
| <b>Method</b>      | ITMS; CID | <b>Genenames</b> | TNPO2                               |

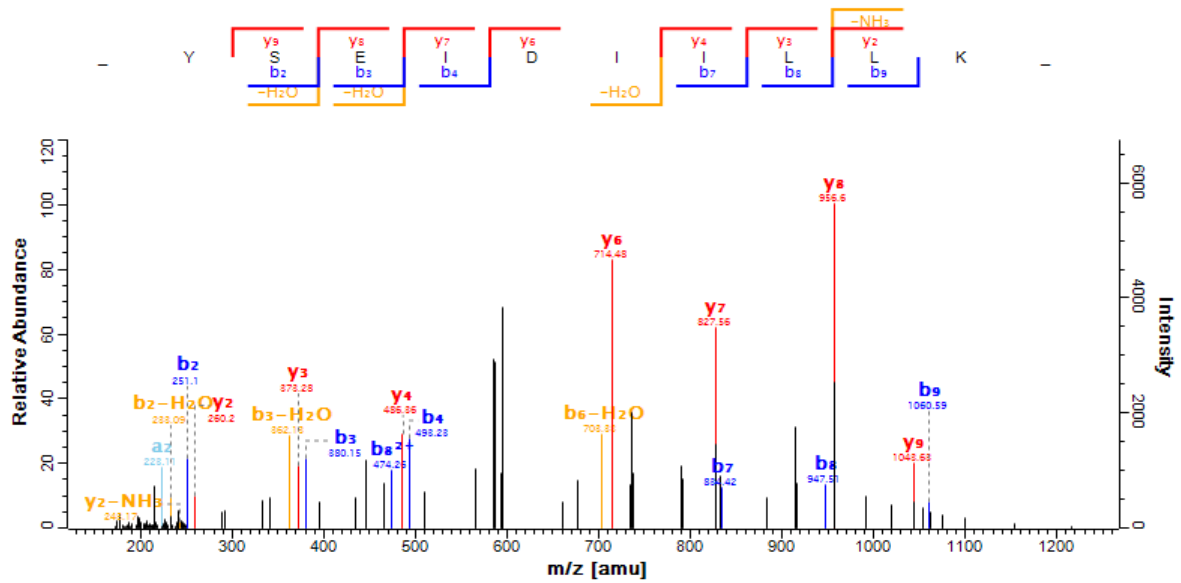

**Protein Group ID:** 1743

**Protein Accession Numbers:** O14950

**Gene Names:** MYL12B

**Peptide Sequence:** NPTDAYLDAMMNEAPGPI N F T M F L T M F G E K

**Total Number of Spectra:** 12

**Number of Replicates (out of 8):** 8

**Best Match Score:** 175.59

**Best Match Posterior Error Probability:** 1.30E-50

**Best Match Spectrum:**

**Scan number** 97395      **Raw file** A549-US-WT-top20CID-Elite-2ug-B11  
**Method** ITMS; CID      **Genenames** MYL12B

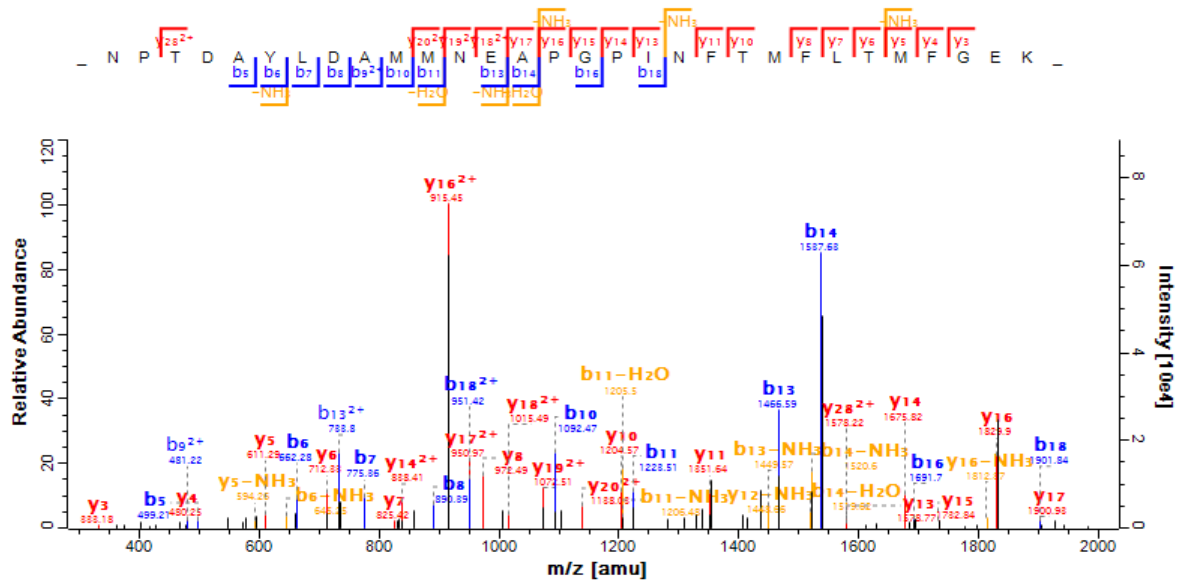

**Protein Group ID:** 1744  
**Protein Accession Numbers:** O14957  
**Gene Names:** UQCR11  
**Peptide Sequence:** LILDWVPYINGK  
**Total Number of Spectra:** 7  
**Number of Replicates (out of 8):** 6  
**Best Match Score:** 172.17  
**Best Match Posterior Error Probability:** 6.82E-09  
**Best Match Spectrum:**

**Scan number** 79450      **Raw file** A549-US-WT-top20CID-Elite-2ug-B13  
**Method** ITMS; CID      **Genenames** UQCR11

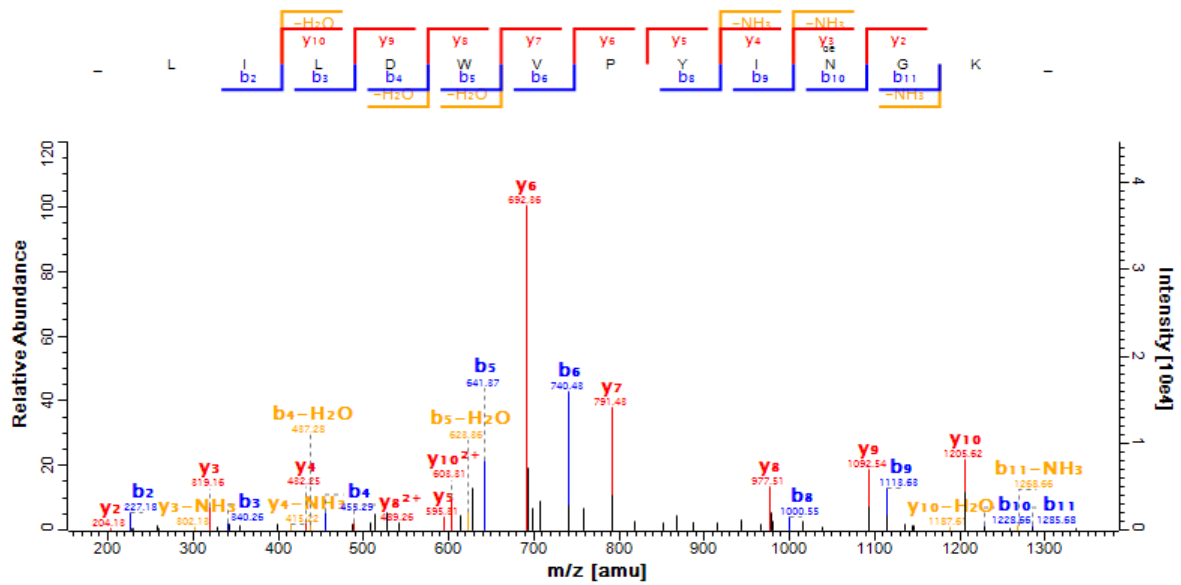

**Protein Group ID:** 1753  
**Protein Accession Numbers:** O15014  
**Gene Names:** ZNF609  
**Peptide Sequence:** MRPNSNTPVNETATASDSK  
**Total Number of Spectra:** 2  
**Number of Replicates (out of 8):** 2  
**Best Match Score:** 128.74  
**Best Match Posterior Error Probability:** 5.81E-05  
**Best Match Spectrum:**

**Scan number** 10830      **Raw file** A549-US-WT-top20CID-Elite-2ug-B12  
**Method** ITMS; CID      **Genenames** ZNF609

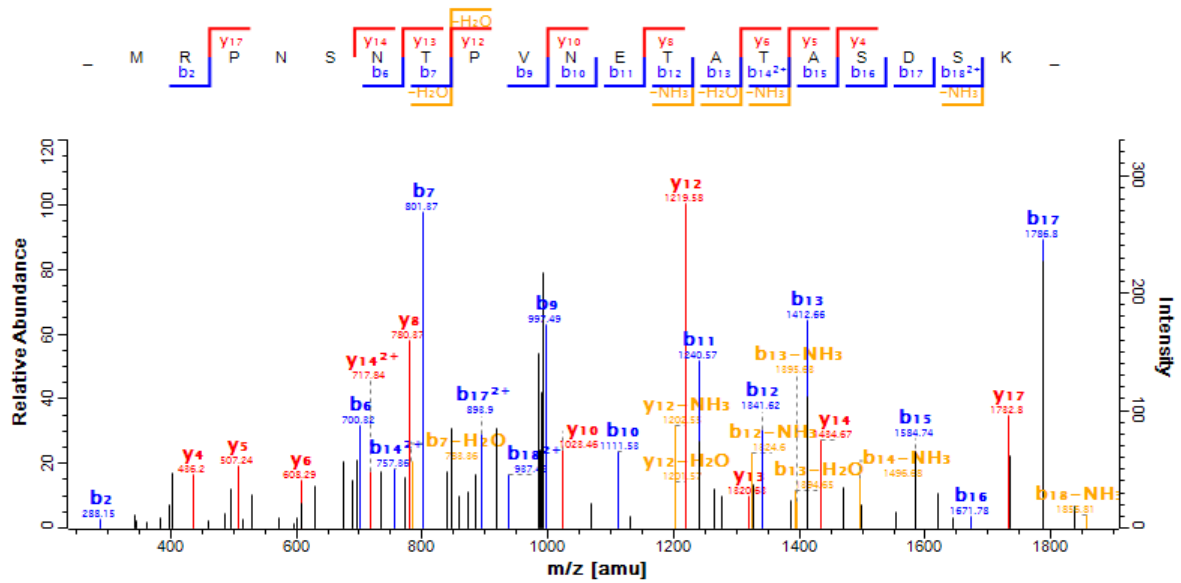

**Protein Group ID:** 1758  
**Protein Accession Numbers:** O15069  
**Gene Names:** NACAD  
**Peptide Sequence:** DIELVMAQANVSR  
**Total Number of Spectra:** 1  
**Number of Replicates (out of 8):** 1  
**Best Match Score:** 134.04  
**Best Match Posterior Error Probability:** 0.0022958  
**Best Match Spectrum:**

**Scan number** 46085      **Raw file** A549-US-WT-top20CID-Elite-2ug-B11  
**Method** ITMS; CID      **Genenames** NACAD

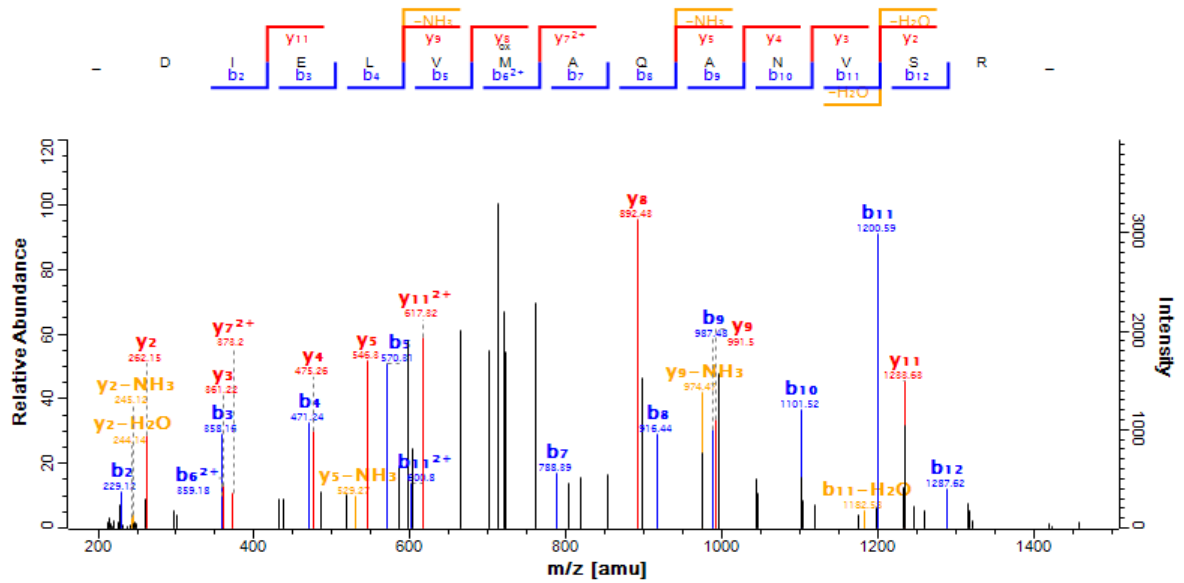

**Protein Group ID:** 1776  
**Protein Accession Numbers:** O15235  
**Gene Names:** MRPS12  
**Peptide Sequence:** LGPTEGRPQLK  
**Total Number of Spectra:** 3  
**Number of Replicates (out of 8):** 3  
**Best Match Score:** 110.08  
**Best Match Posterior Error Probability:** 0.00071137  
**Best Match Spectrum:**

**Scan number** 14797      **Raw file** A549-US-Mock-top20CID-Elite-2ug-B13  
**Method** ITMS; CID      **Genenames** MRPS12

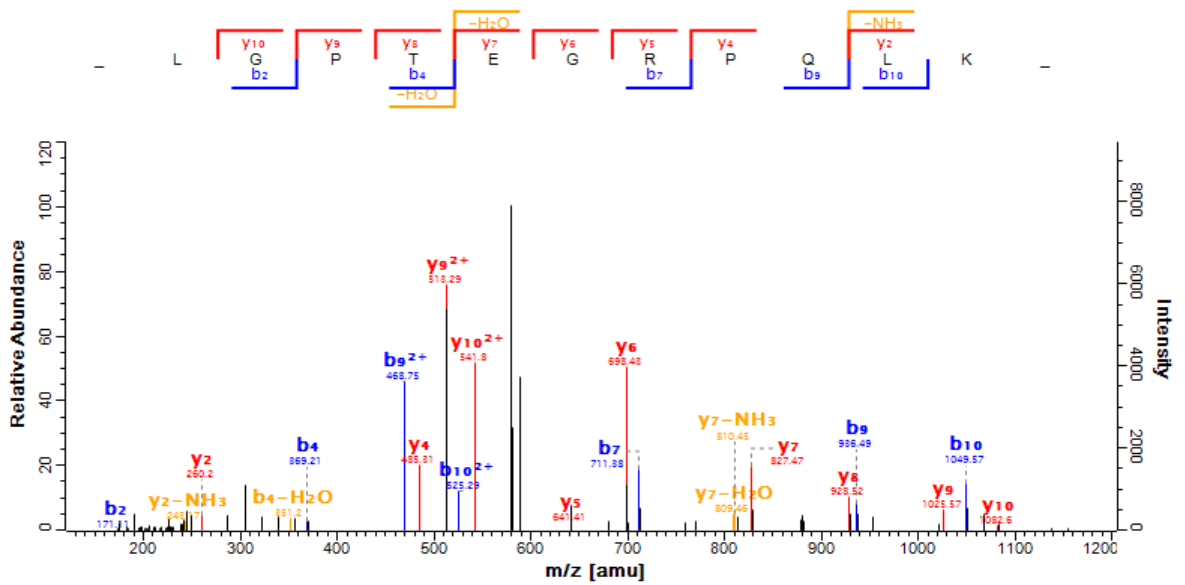



**Protein Group ID:** 1787

**Protein Accession Numbers:** O15379-2; O15379; E7EWI8

**Gene Names:** HDAC3

**Peptide Sequence:** PYQASQHDMCR

**Total Number of Spectra:** 10

**Number of Replicates (out of 8):** 8

**Best Match Score:** 162.68

**Best Match Posterior Error Probability:** 1.13E-05

**Best Match Spectrum:**

**Scan number** 5144      **Raw file** A549-US-WT-top20CID-Elite-2ug-B12  
**Method** ITMS; CID      **Genenames** HDAC3

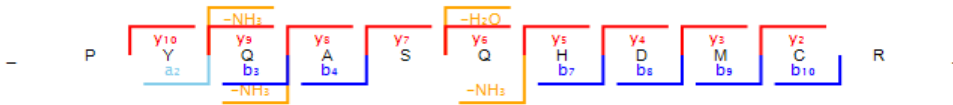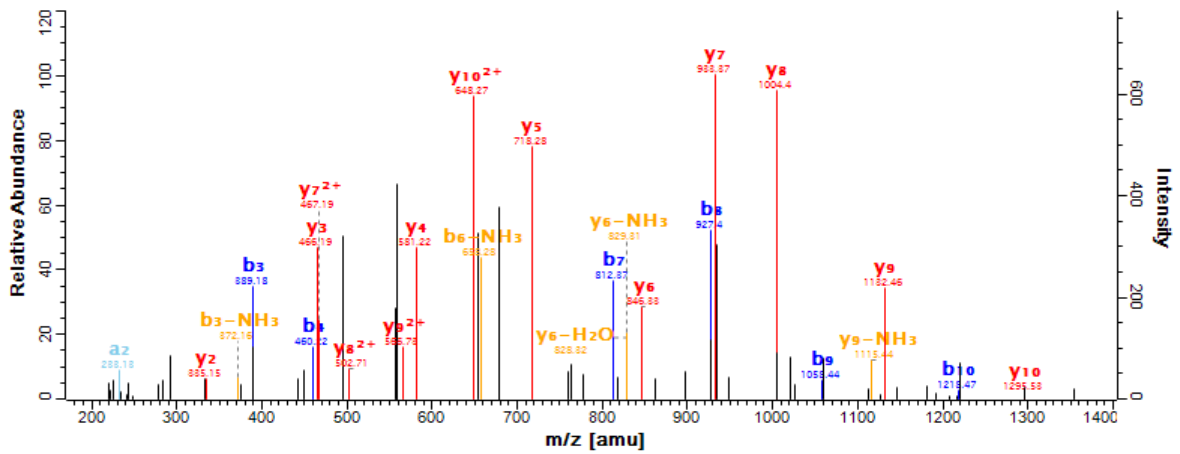

**Protein Group ID:** 1827  
**Protein Accession Numbers:** O43439-4  
**Gene Names:**  
**Peptide Sequence:** MGFHHVGQAR  
**Total Number of Spectra:** 1  
**Number of Replicates (out of 8):** 1  
**Best Match Score:** 106.6  
**Best Match Posterior Error Probability:** 0.0025465  
**Best Match Spectrum:**

**Scan number** 29791      **Raw file** A549-US-Mock-top20CID-Elite-2ug-B13  
**Method** ITMS; CID      **Pepti...** 106.6

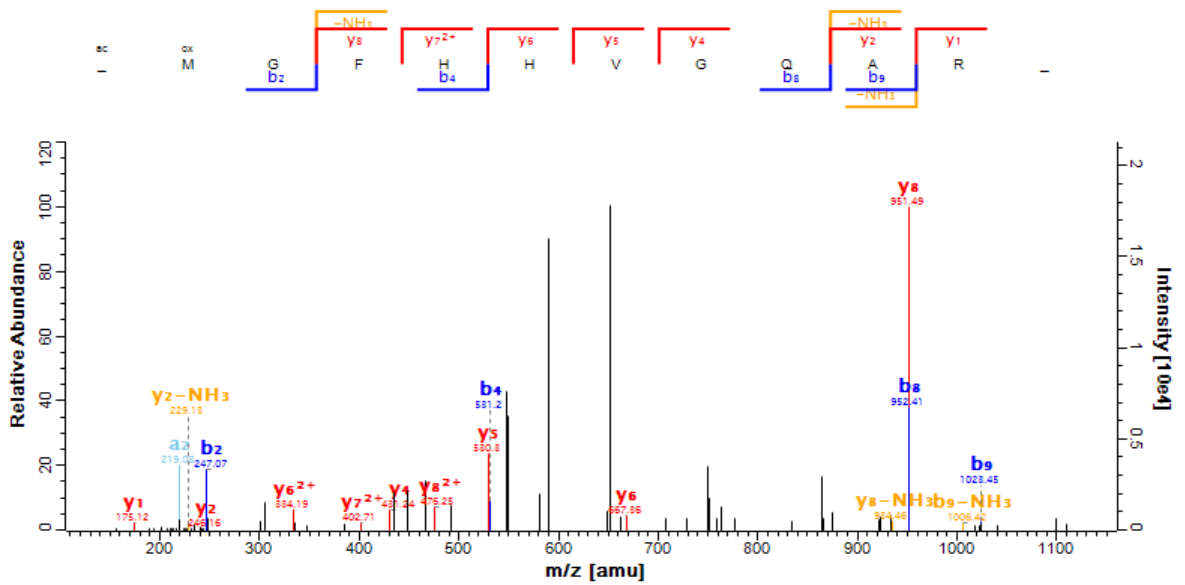

**Protein Group ID:** 1863  
**Protein Accession Numbers:** O43924  
**Gene Names:** PDE6D  
**Peptide Sequence:** FD<sup>2+</sup>DDLLVSTSR  
**Total Number of Spectra:** 3  
**Number of Replicates (out of 8):** 3  
**Best Match Score:** 147.33  
**Best Match Posterior Error Probability:** 5.50E-06  
**Best Match Spectrum:**

**Scan number** 56072      **Raw file** A549-US-Mock-top20CID-Elite-2ug-B14  
**Method** ITMS; CID      **Genenames** PDE6D

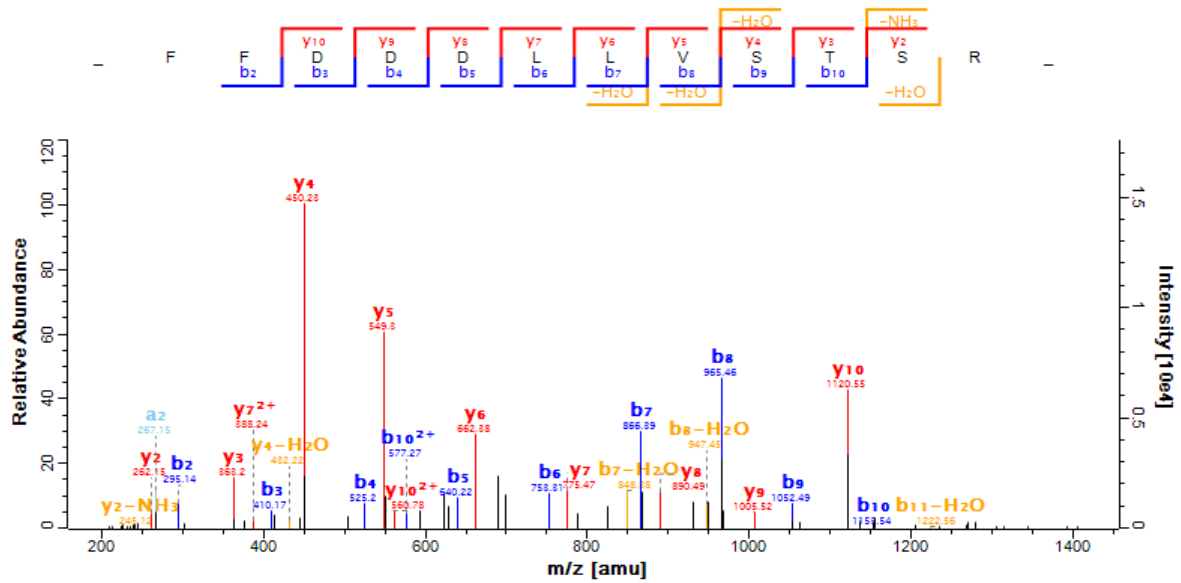

**Protein Group ID:** 1871  
**Protein Accession Numbers:** O60269  
**Gene Names:** GPRIN2  
**Peptide Sequence:** AQLQPGGTSGQGQAPAGLER  
**Total Number of Spectra:** 2  
**Number of Replicates (out of 8):** 2  
**Best Match Score:** 78.975  
**Best Match Posterior Error Probability:** 0.00034979  
**Best Match Spectrum:**

**Scan number** 22169      **Raw file** A549-US-Mock-top20CID-Elite-2ug-B11  
**Method** ITMS; CID      **Genenames** GPRIN2

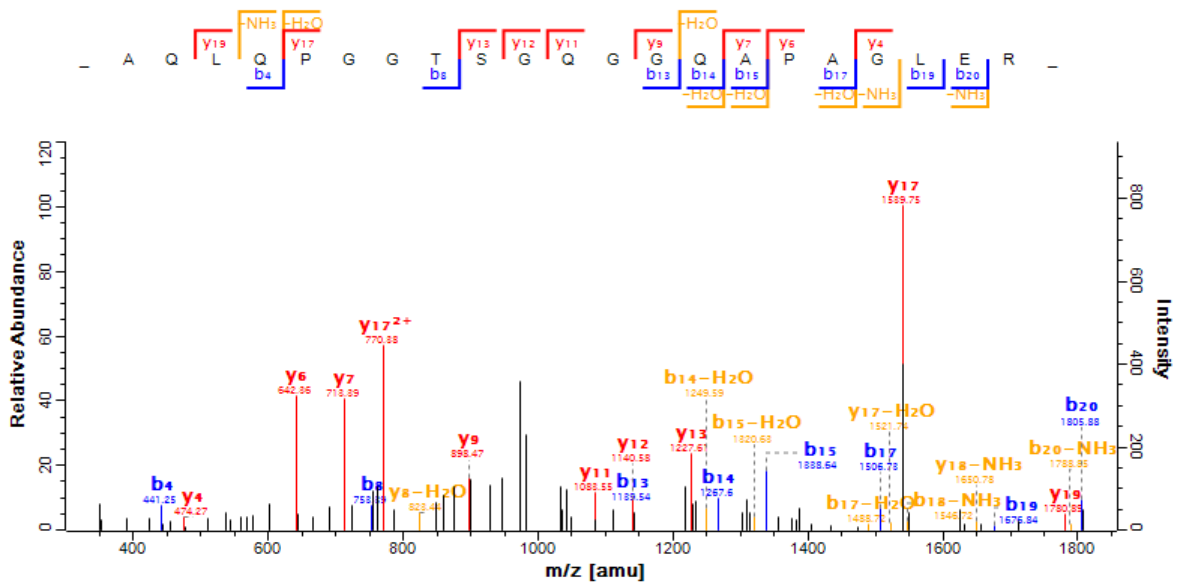

**Protein Group ID:** 1887  
**Protein Accession Numbers:** O60508; Q5SRN1  
**Gene Names:** CDC40  
**Peptide Sequence:** SYLHIPQDVGVNLR  
**Total Number of Spectra:** 7  
**Number of Replicates (out of 8):** 6  
**Best Match Score:** 112.08  
**Best Match Posterior Error Probability:** 0.00014601  
**Best Match Spectrum:**

**Scan number** 51407      **Raw file** A549-US-Mock-top20CID-Elite-2ug-B14  
**Method** ITMS; CID      **Genenames** CDC40

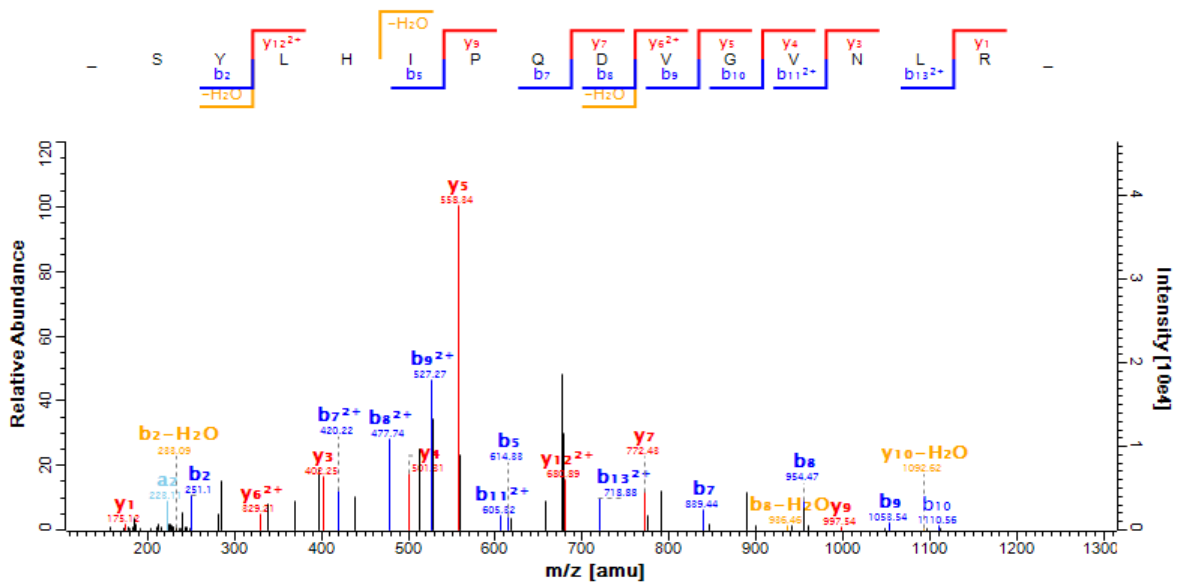

**Protein Group ID:** 1888  
**Protein Accession Numbers:** O60518  
**Gene Names:** RANBP6  
**Peptide Sequence:** FMQDASNVMQLLLK  
**Total Number of Spectra:** 9  
**Number of Replicates (out of 8):** 6  
**Best Match Score:** 181.71  
**Best Match Posterior Error Probability:** 2.60E-18  
**Best Match Spectrum:**

**Scan number** 84147      **Raw file** A549-US-Mock-top20CID-Elite-2ug-B14  
**Method** ITMS; CID      **Genenames** RANBP6

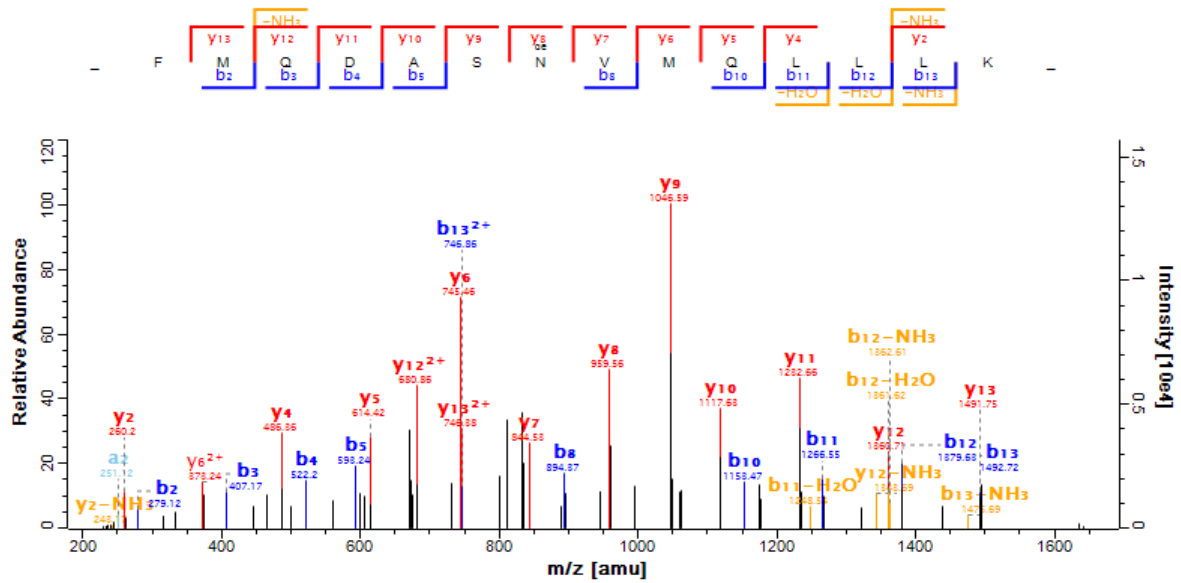

**Protein Group ID:** 1913

**Protein Accession Numbers:** O60942; O60942-2; O60942-4; Q5TCW7; O60942-3

**Gene Names:** RNGTT

**Peptide Sequence:** YDSQVAEENR

**Total Number of Spectra:** 3

**Number of Replicates (out of 8):** 3

**Best Match Score:** 119.39

**Best Match Posterior Error Probability:** 0.00023613

**Best Match Spectrum:**

**Scan number** 5862      **Raw file** A549-US-WT-top20CID-Elite-2ug-B12  
**Method** ITMS; CID      **Genenames** RNGTT

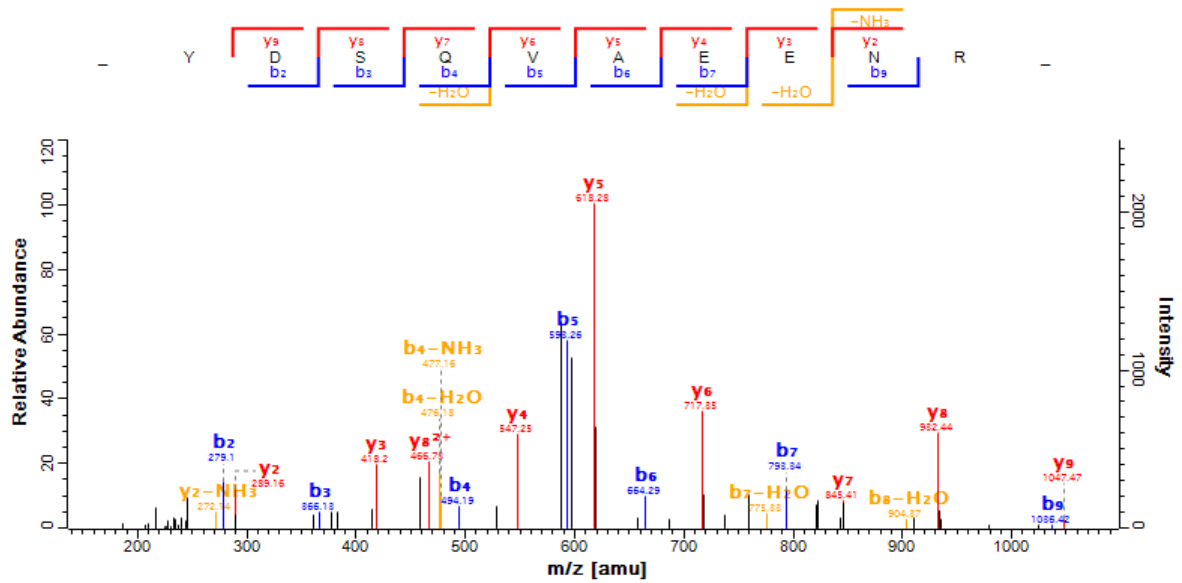

**Protein Group ID:** 1919

**Protein Accession Numbers:** O75151

**Gene Names:** PHF2

**Peptide Sequence:** VPGSQLTGLGYMEEELHGGFTPEILVPK

**Total Number of Spectra:** 1

**Number of Replicates (out of 8):** 1

**Best Match Score:** 83.723

**Best Match Posterior Error Probability:** 5.33E-05

**Best Match Spectrum:**

|                    |           |                  |                                     |
|--------------------|-----------|------------------|-------------------------------------|
| <b>Scan number</b> | 72836     | <b>Raw file</b>  | A549-US-Mock-top20CID-Elite-2ug-B13 |
| <b>Method</b>      | ITMS; CID | <b>Genenames</b> | PHF2                                |

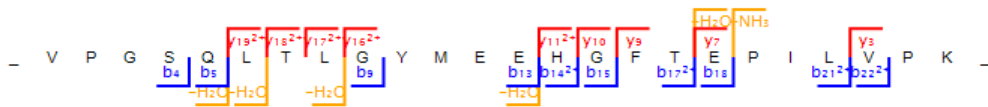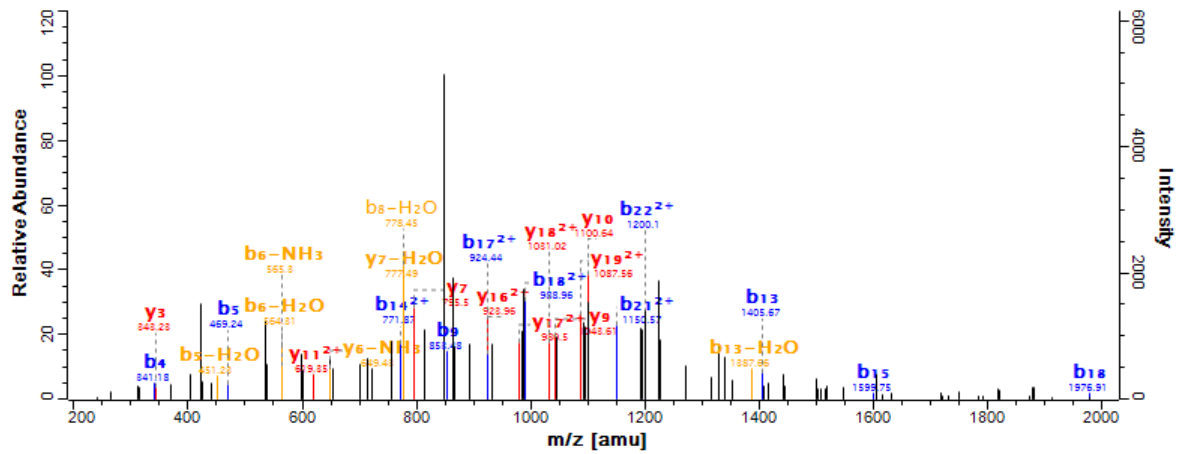





**Protein Group ID:** 1924  
**Protein Accession Numbers:** O75175; O75175-2  
**Gene Names:** CNOT3  
**Peptide Sequence:** VSEGVEQFEDIWQK  
**Total Number of Spectra:** 4  
**Number of Replicates (out of 8):** 3  
**Best Match Score:** 150.05  
**Best Match Posterior Error Probability:** 1.48E-06  
**Best Match Spectrum:**

**Scan number** 62090      **Raw file** A549-US-WT-top20CID-Elite-2ug-B11  
**Method** ITMS; CID      **Genenames** CNOT3

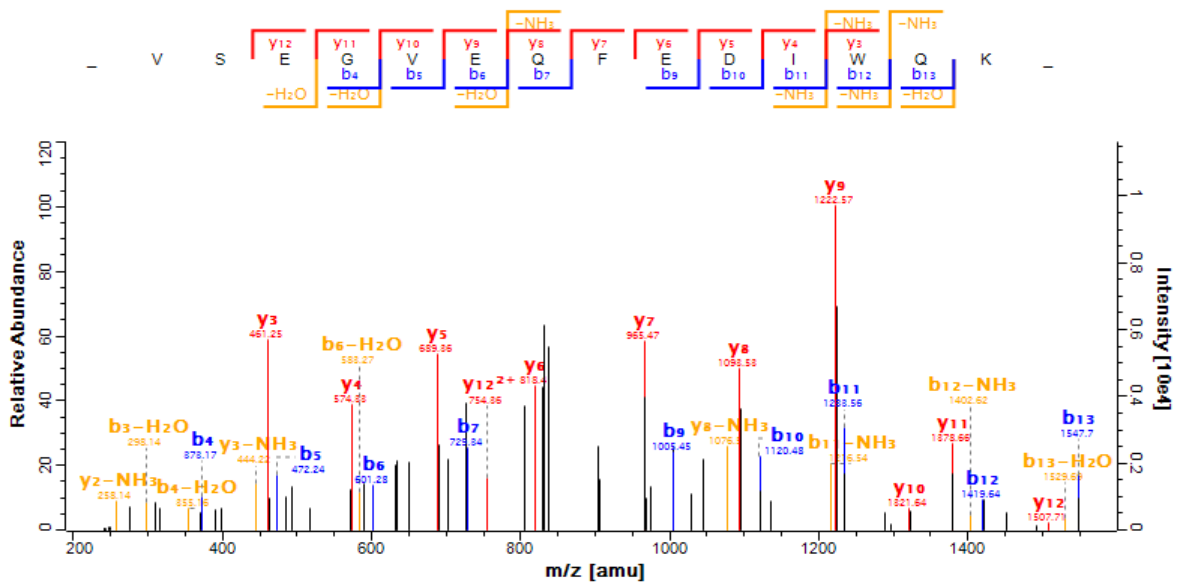

**Protein Group ID:** 1938

**Protein Accession Numbers:** O75381; O75381-2

**Gene Names:** PEX14

**Peptide Sequence:** ASSEQAEQSPQSSTPGSENVLP

**Total Number of Spectra:** 3

**Number of Replicates (out of 8):** 3

**Best Match Score:** 96.718

**Best Match Posterior Error Probability:** 4.13E-06

**Best Match Spectrum:**

|                    |           |                  |                                   |
|--------------------|-----------|------------------|-----------------------------------|
| <b>Scan number</b> | 34177     | <b>Raw file</b>  | A549-US-WT-top20CID-Elite-2ug-B13 |
| <b>Method</b>      | ITMS; CID | <b>Genenames</b> | PEX14                             |

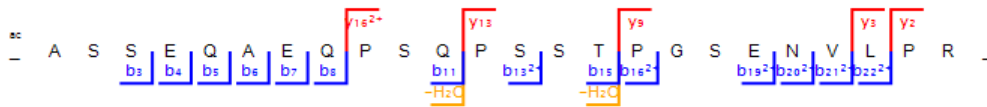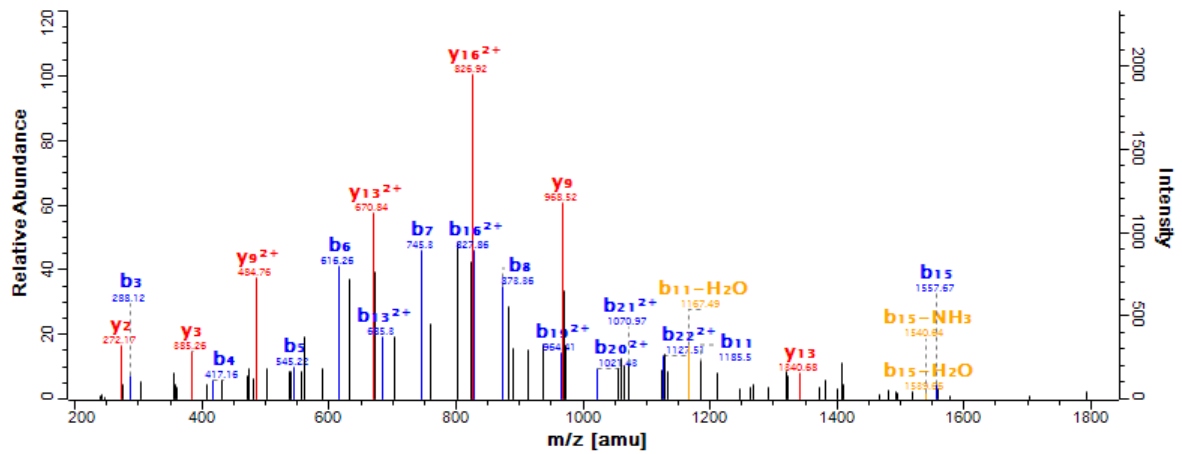

**Protein Group ID:** 1940  
**Protein Accession Numbers:** O75394  
**Gene Names:** MRPL33  
**Peptide Sequence:** LTLHYDPVVK  
**Total Number of Spectra:** 4  
**Number of Replicates (out of 8):** 4  
**Best Match Score:** 87.184  
**Best Match Posterior Error Probability:** 0.0017866  
**Best Match Spectrum:**

**Scan number** 45928      **Raw file** A549-US-Mock-top20CID-Elite-2ug-B14  
**Method** ITMS; CID      **Genenames** MRPL33

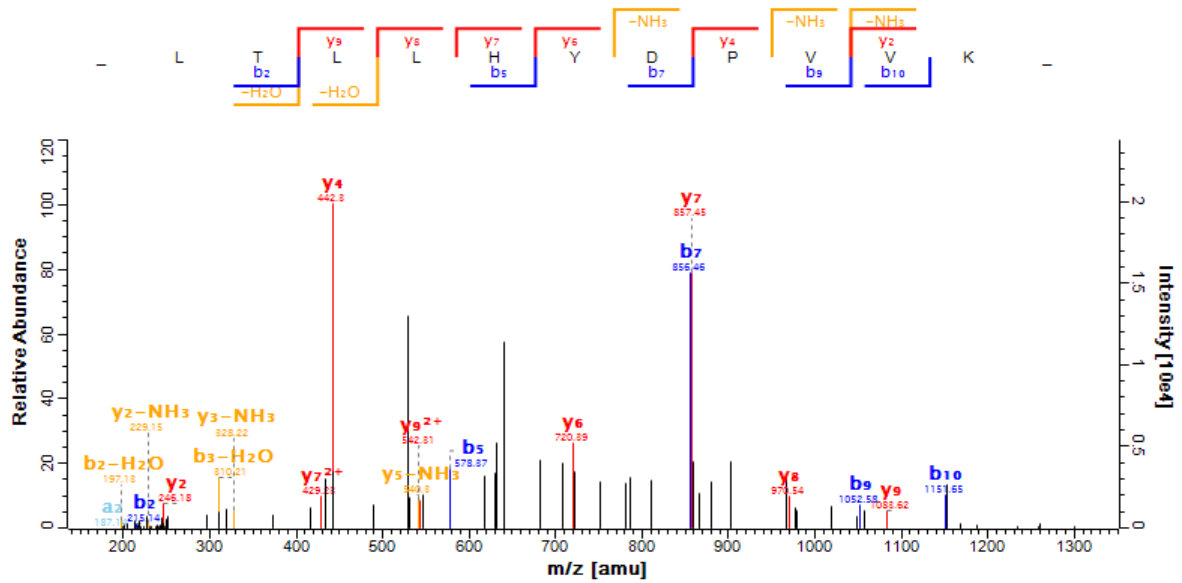

**Protein Group ID:** 1945  
**Protein Accession Numbers:** O75438-2; O75438  
**Gene Names:** NDUFB1  
**Peptide Sequence:** RELQPSEEVTK  
**Total Number of Spectra:** 3  
**Number of Replicates (out of 8):** 3  
**Best Match Score:** 102.87  
**Best Match Posterior Error Probability:** 0.0010323  
**Best Match Spectrum:**

**Scan number** 27567      **Raw file** A549-US-WT-top20CID-Elite-2ug-B13  
**Method** ITMS; CID      **Genenames** NDUFB1

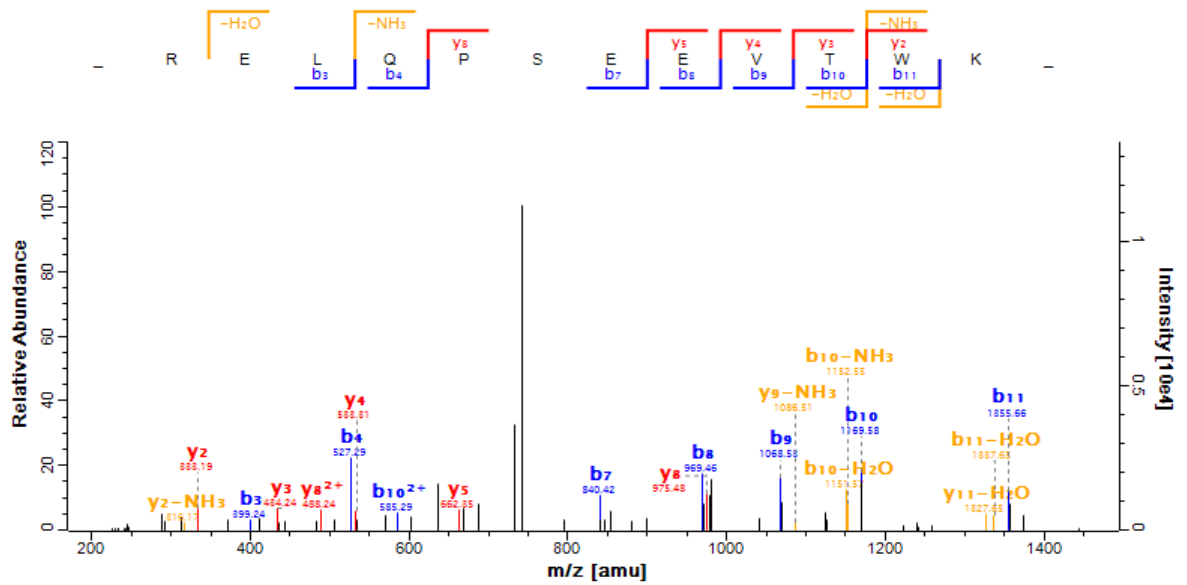

**Protein Group ID:** 1959  
**Protein Accession Numbers:** O75629  
**Gene Names:** CREG1  
**Peptide Sequence:** FVTHVSDWGLALATISLTLEAVR  
**Total Number of Spectra:** 4  
**Number of Replicates (out of 8):** 4  
**Best Match Score:** 79.676  
**Best Match Posterior Error Probability:** 0.00032886  
**Best Match Spectrum:**

**Scan number** 79059      **Raw file** A549-US-Mock-top20CID-Elite-2ug-B14  
**Method** ITMS; CID      **Genenames** CREG1

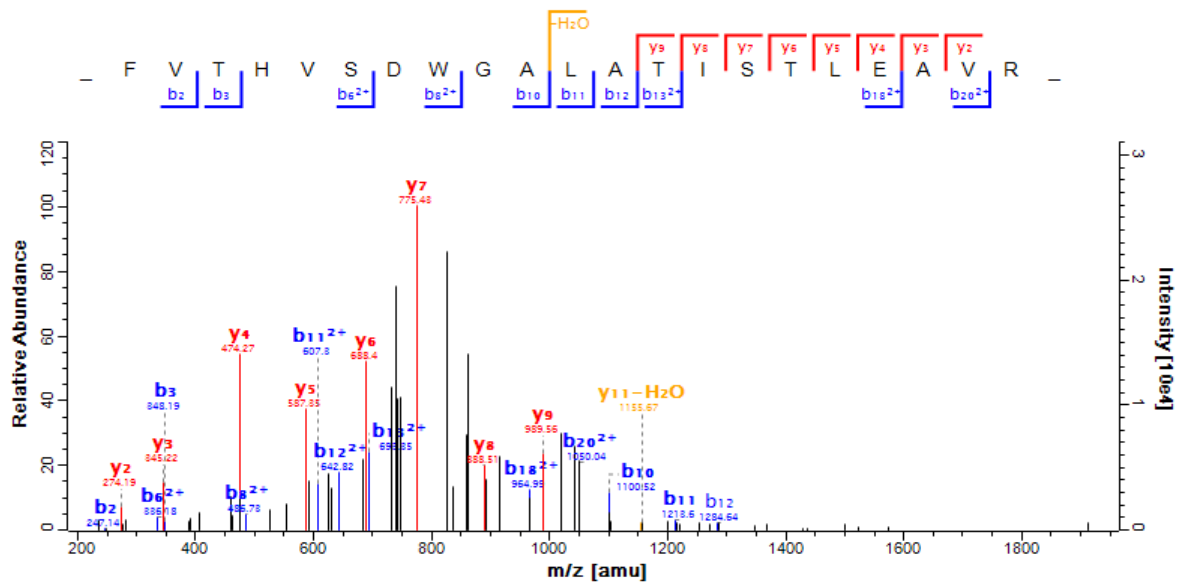

**Protein Group ID:** 1970  
**Protein Accession Numbers:** Q96KH7; O75751  
**Gene Names:** SLC22A3  
**Peptide Sequence:** PSFDEALQR  
**Total Number of Spectra:** 1  
**Number of Replicates (out of 8):** 1  
**Best Match Score:** 130.66  
**Best Match Posterior Error Probability:** 0.00029753  
**Best Match Spectrum:**

**Scan number** 27162      **Raw file** A549-US-Mock-top20CID-Elite-2ug-B11  
**Method** ITMS; CID      **Genenames** SLC22A3

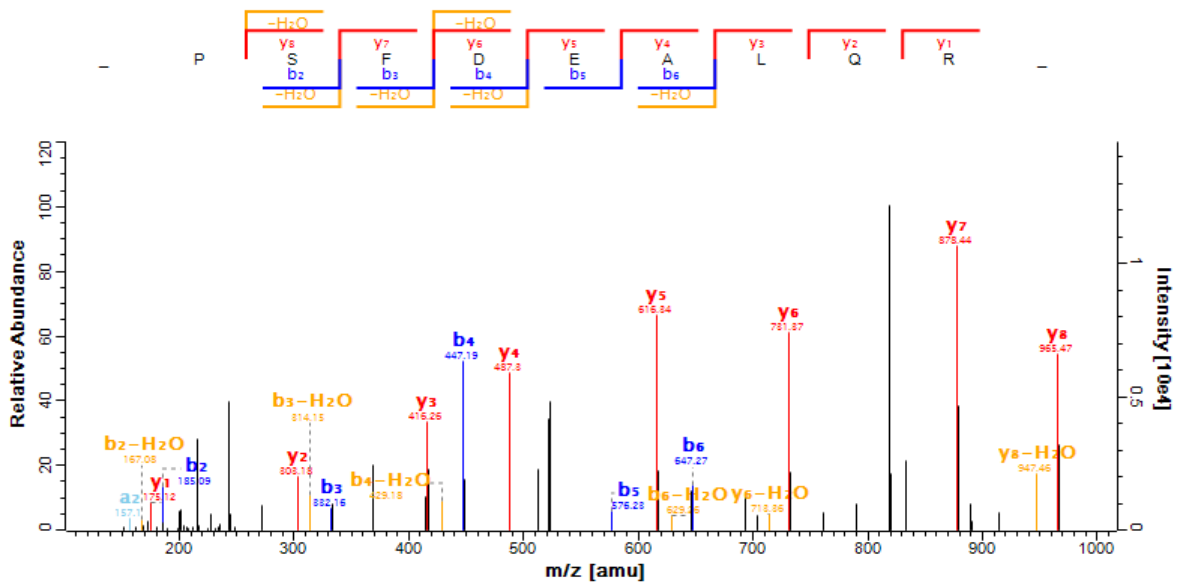

**Protein Group ID:** 1971  
**Protein Accession Numbers:** O75781; O75781-2  
**Gene Names:** PALM  
**Peptide Sequence:** MEVLAAETTSQQER  
**Total Number of Spectra:** 2  
**Number of Replicates (out of 8):** 2  
**Best Match Score:** 94.487  
**Best Match Posterior Error Probability:** 0.0010948  
**Best Match Spectrum:**

|                    |           |                  |                                     |
|--------------------|-----------|------------------|-------------------------------------|
| <b>Scan number</b> | 54721     | <b>Raw file</b>  | A549-US-Mock-top20CID-Elite-2ug-B13 |
| <b>Method</b>      | ITMS; CID | <b>Genenames</b> | PALM                                |

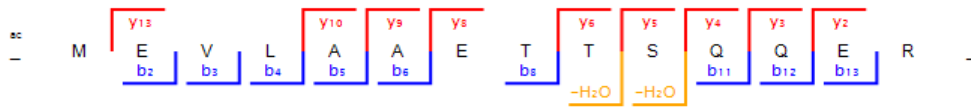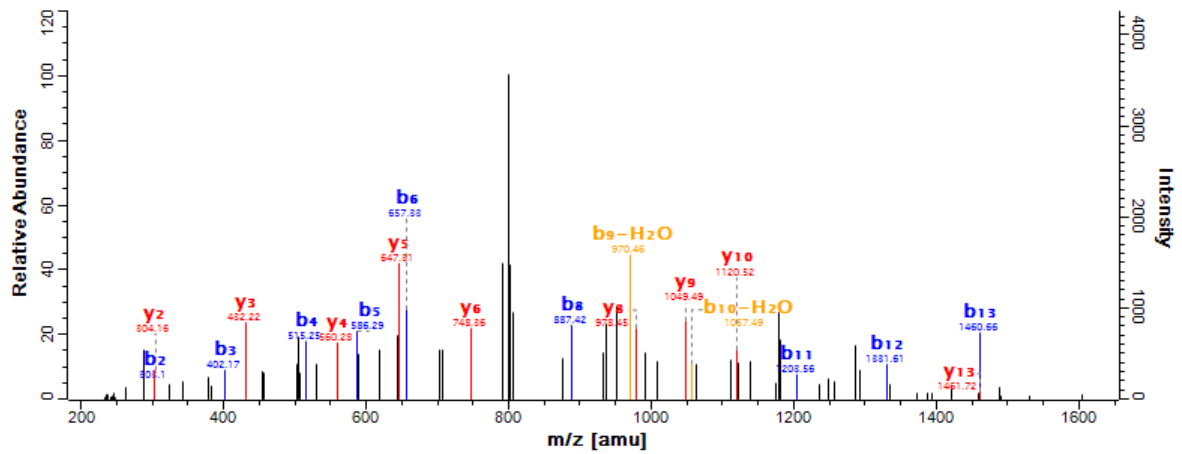



**Protein Group ID:** 1981

**Protein Accession Numbers:** O75882; O75882-2; O75882-3

**Gene Names:** ATRN

**Peptide Sequence:** LTGSSGFVTDGPGNYK

**Total Number of Spectra:** 2

**Number of Replicates (out of 8):** 2

**Best Match Score:** 100.23

**Best Match Posterior Error Probability:** 0.0020664

**Best Match Spectrum:**

**Scan number** 30735      **Raw file** A549-US-WT-top20CID-Elite-2ug-B14  
**Method** ITMS; CID      **Genenames** ATRN

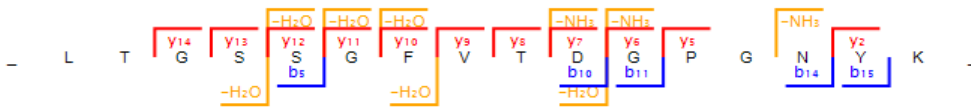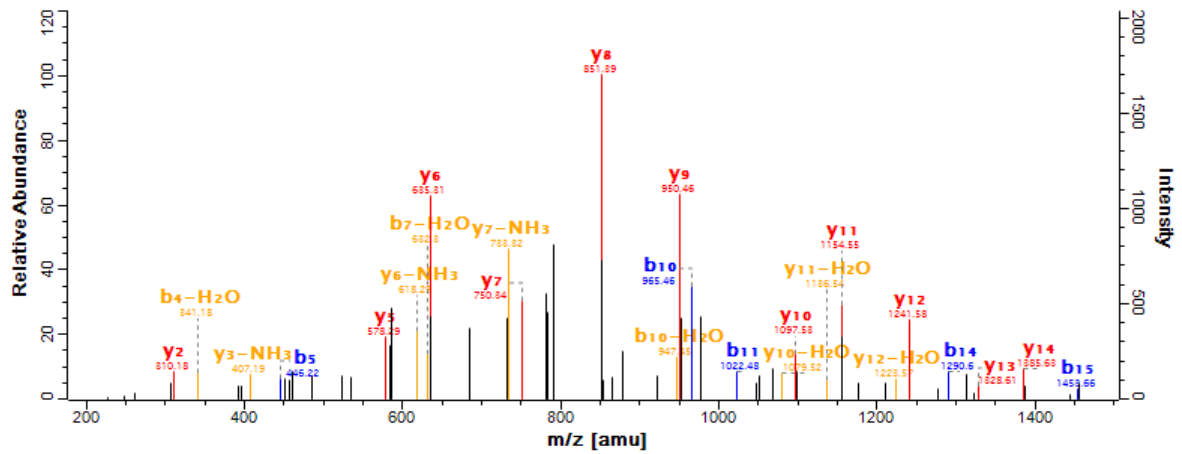

**Protein Group ID:** 1993  
**Protein Accession Numbers:** O76024  
**Gene Names:** WFS1  
**Peptide Sequence:** DAAAPAEPQAQHTR  
**Total Number of Spectra:** 7  
**Number of Replicates (out of 8):** 7  
**Best Match Score:** 185.95  
**Best Match Posterior Error Probability:** 2.98E-19  
**Best Match Spectrum:**

**Scan number** 4469      **Raw file** A549-US-WT-top20CID-Elite-2ug-B14  
**Method** ITMS; CID      **Genenames** WFS1

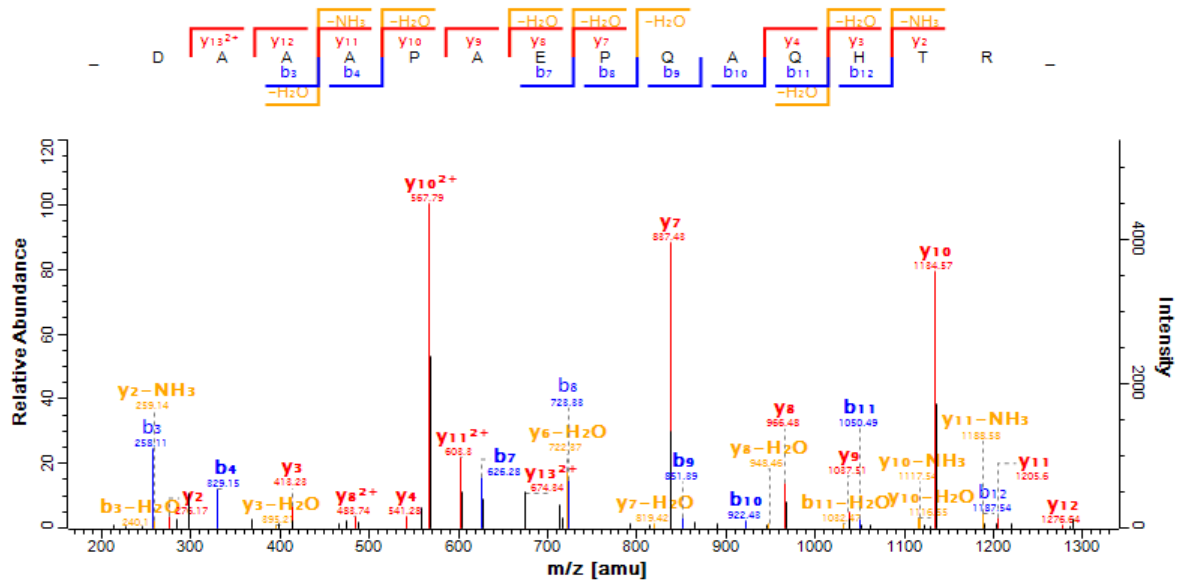

**Protein Group ID:** 1996  
**Protein Accession Numbers:** O76070  
**Gene Names:** SNCG  
**Peptide Sequence:** EKEEVAEEAQSGGD  
**Total Number of Spectra:** 2  
**Number of Replicates (out of 8):** 2  
**Best Match Score:** 132.97  
**Best Match Posterior Error Probability:** 0.00019455  
**Best Match Spectrum:**

**Scan number** 6101      **Raw file** A549-US-WT-top20CID-Elite-2ug-B14  
**Method** ITMS; CID      **Genenames** SNCG

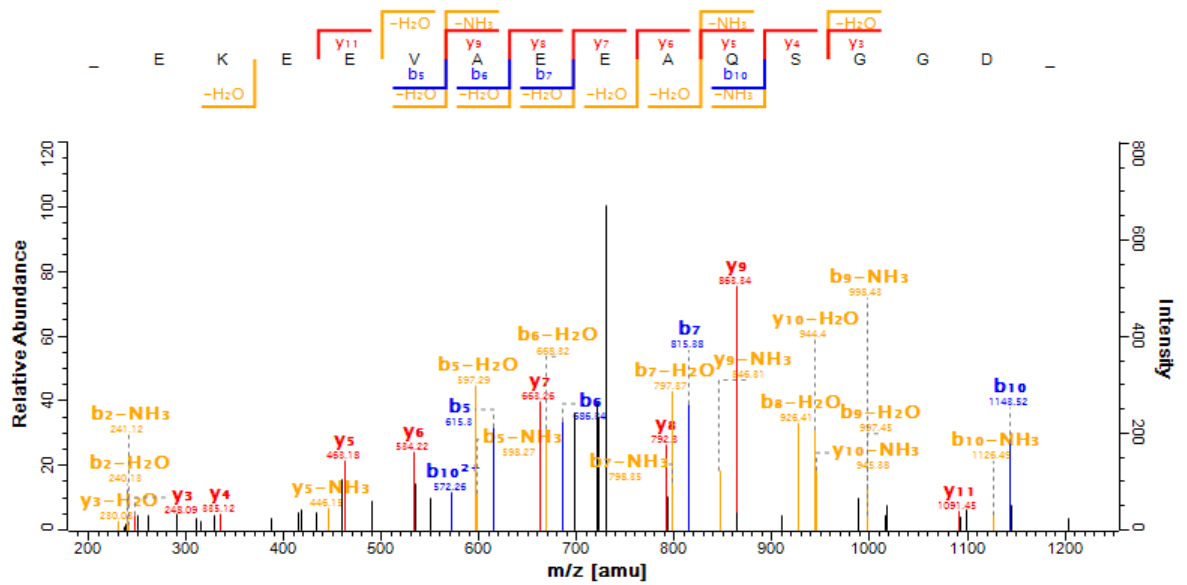

**Protein Group ID:** 1998  
**Protein Accession Numbers:** O76080; Q5QPB1  
**Gene Names:** ZFAND5  
**Peptide Sequence:** MSPMGTASGSNSPTSDSASVQR  
**Total Number of Spectra:** 2  
**Number of Replicates (out of 8):** 2  
**Best Match Score:** 76.492  
**Best Match Posterior Error Probability:** 0.00018973  
**Best Match Spectrum:**

**Scan number** 21151      **Raw file** A549-US-Mock-top20CID-Elite-2ug-B14  
**Method** ITMS; CID      **Genenames** ZFAND5

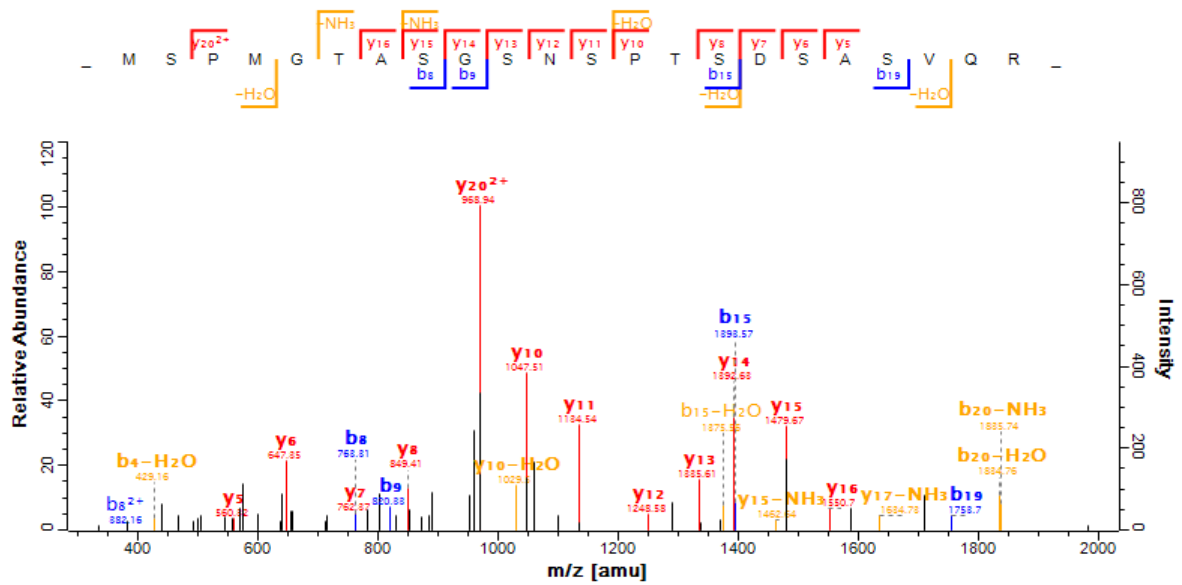

**Protein Group ID:** 1999  
**Protein Accession Numbers:** O76081-6  
**Gene Names:**  
**Peptide Sequence:** TADGGEPAGASSPAGR  
**Total Number of Spectra:** 1  
**Number of Replicates (out of 8):** 1  
**Best Match Score:** 73.834  
**Best Match Posterior Error Probability:** 0.0037142  
**Best Match Spectrum:**

**Scan number** 4367      **Raw file** A549-US-WT-top20CID-Elite-2ug-B13  
**Method** ITMS; CID      **Pepti...** 73.83

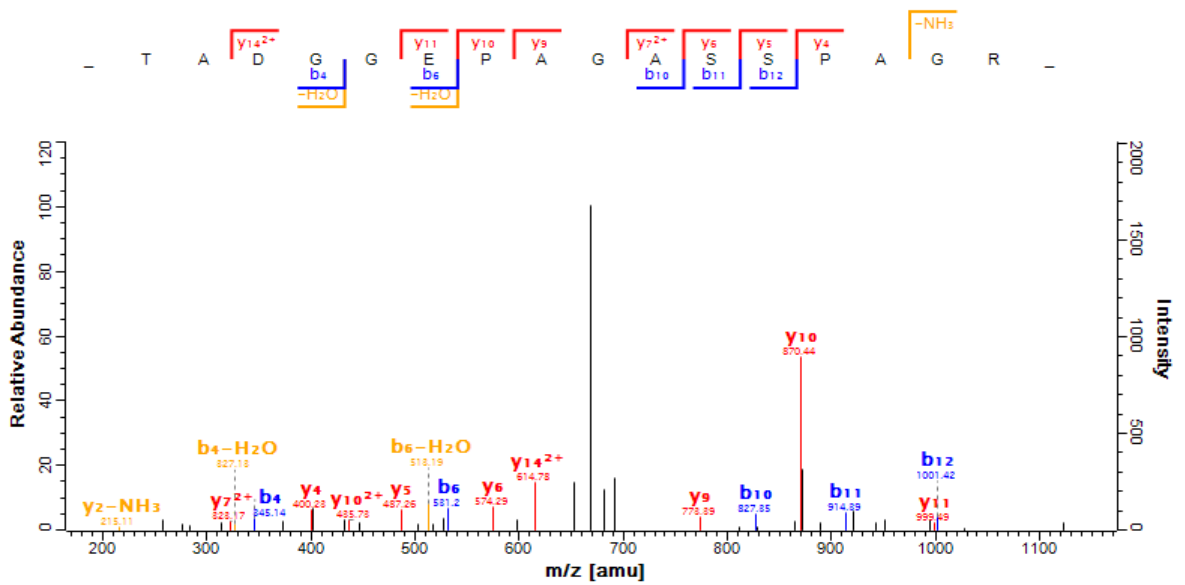

**Protein Group ID:** 2004  
**Protein Accession Numbers:** O94811  
**Gene Names:** TPPP  
**Peptide Sequence:** TITFEQFQEALAK  
**Total Number of Spectra:** 1  
**Number of Replicates (out of 8):** 1  
**Best Match Score:** 74.428  
**Best Match Posterior Error Probability:** 0.0034311  
**Best Match Spectrum:**

**Scan number** 90834      **Raw file** A549-US-Mock-top20CID-Elite-2ug-B12  
**Method** ITMS; CID      **Genenames** TPPP

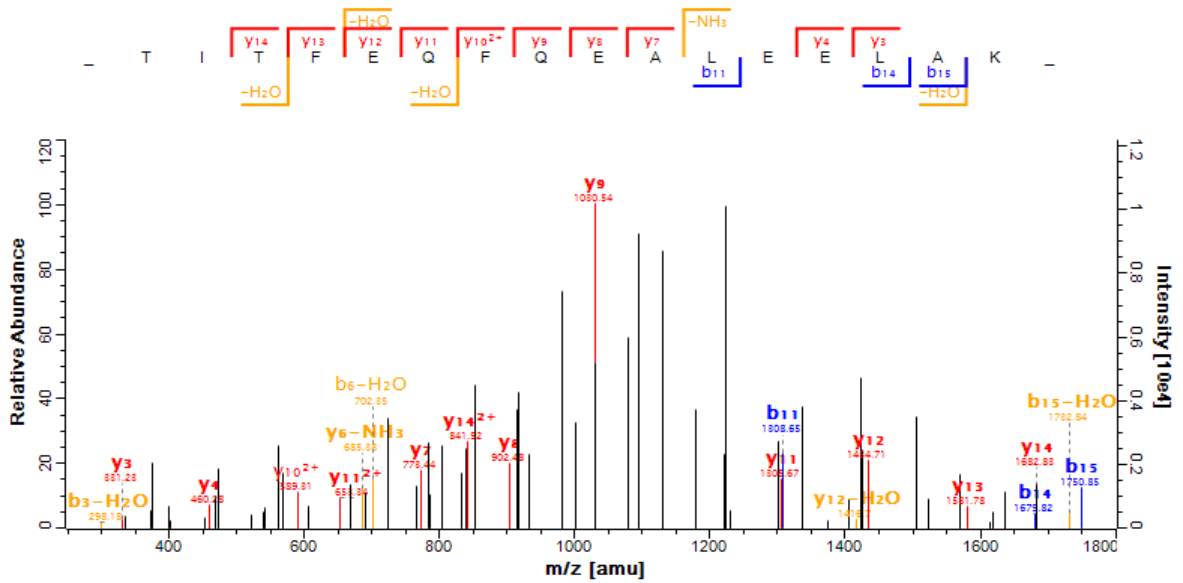

**Protein Group ID:** 2010  
**Protein Accession Numbers:** O94880  
**Gene Names:** PHF14  
**Peptide Sequence:** SNEDSLILEK  
**Total Number of Spectra:** 1  
**Number of Replicates (out of 8):** 1  
**Best Match Score:** 113.22  
**Best Match Posterior Error Probability:** 0.000264  
**Best Match Spectrum:**

**Scan number** 26542      **Raw file** A549-US-Mock-top20CID-Elite-2ug-B13  
**Method** ITMS; CID      **Genenames** PHF14

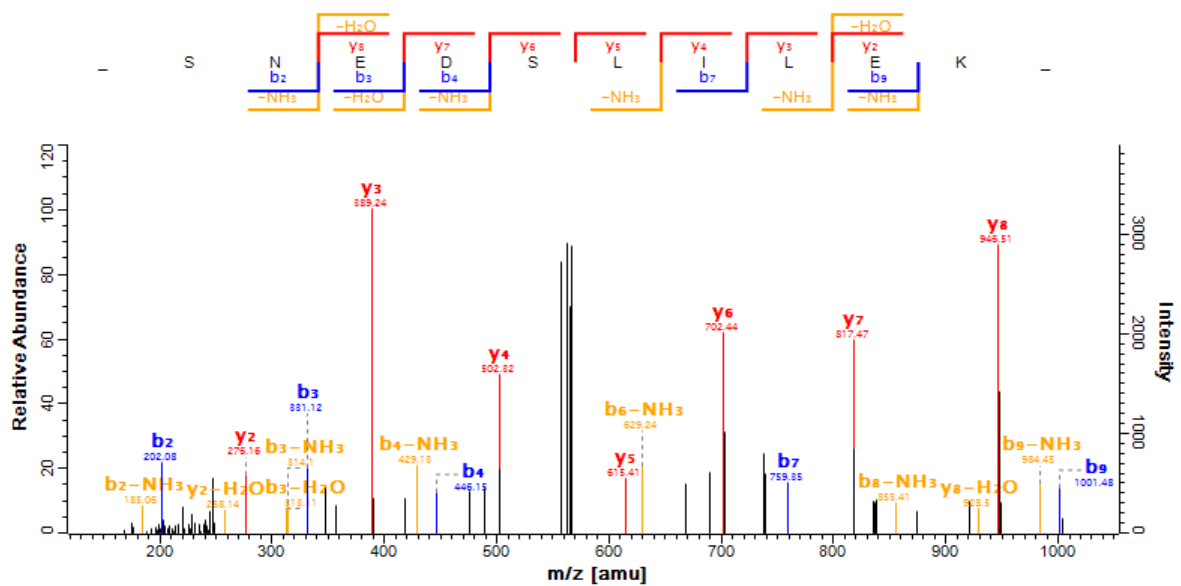

**Protein Group ID:** 2017  
**Protein Accession Numbers:** O94929  
**Gene Names:** ABLIM3  
**Peptide Sequence:** VDNEILNYK  
**Total Number of Spectra:** 4  
**Number of Replicates (out of 8):** 3  
**Best Match Score:** 133.23  
**Best Match Posterior Error Probability:** 0.0002056  
**Best Match Spectrum:**

**Scan number** 30812      **Raw file** A549-US-Mock-top20CID-Elite-2ug-B13  
**Method** ITMS; CID      **Genenames** ABLIM3

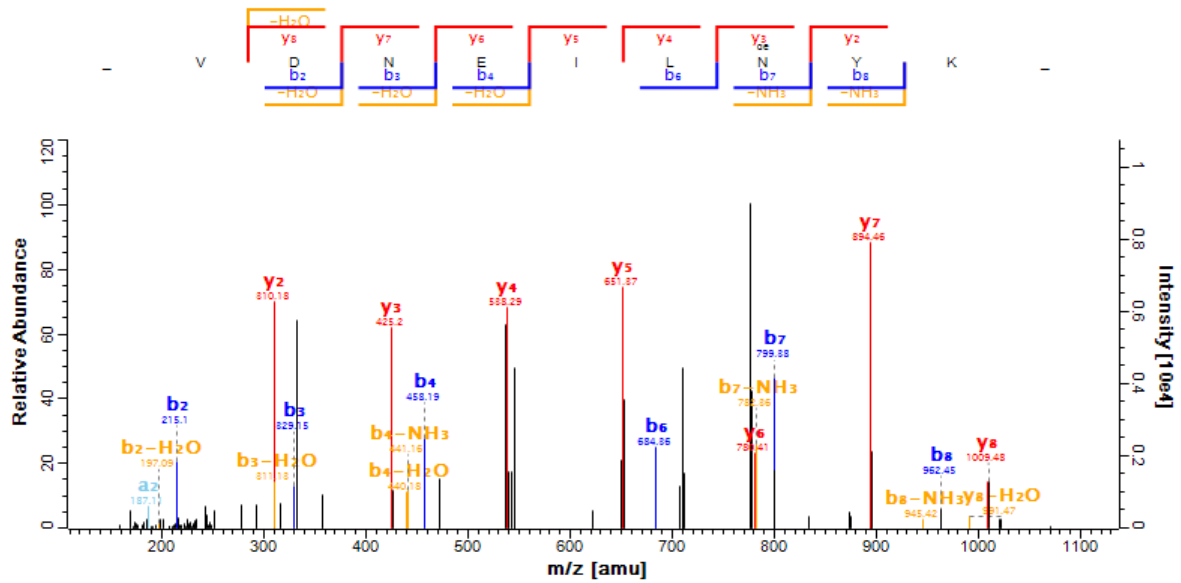



**Protein Group ID:** 2020  
**Protein Accession Numbers:** O95081; O95081-2  
**Gene Names:** AGFG2  
**Peptide Sequence:** IWLGLFDAR  
**Total Number of Spectra:** 1  
**Number of Replicates (out of 8):** 1  
**Best Match Score:** 104.2  
**Best Match Posterior Error Probability:** 0.0014418  
**Best Match Spectrum:**

|                    |           |                  |                                   |
|--------------------|-----------|------------------|-----------------------------------|
| <b>Scan number</b> | 72951     | <b>Raw file</b>  | A549-US-WT-top20CID-Elite-2ug-B11 |
| <b>Method</b>      | ITMS; CID | <b>Genenames</b> | AGFG2                             |

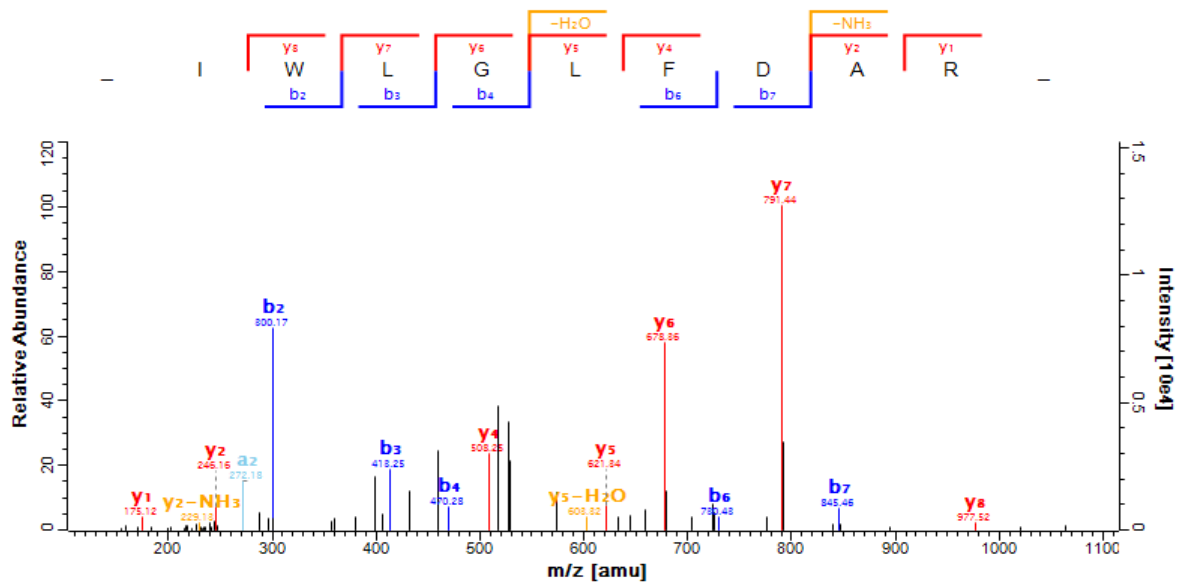

**Protein Group ID:** 2021  
**Protein Accession Numbers:** O95139  
**Gene Names:** NDUFB6  
**Peptide Sequence:** IFPGDTILETGEVIPPVK  
**Total Number of Spectra:** 17  
**Number of Replicates (out of 8):** 8  
**Best Match Score:** 111.22  
**Best Match Posterior Error Probability:** 5.50E-05  
**Best Match Spectrum:**

**Scan number** 74383      **Raw file** A549-US-WT-top20CID-Elite-2ug-B11  
**Method** ITMS; CID      **Genenames** NDUFB6

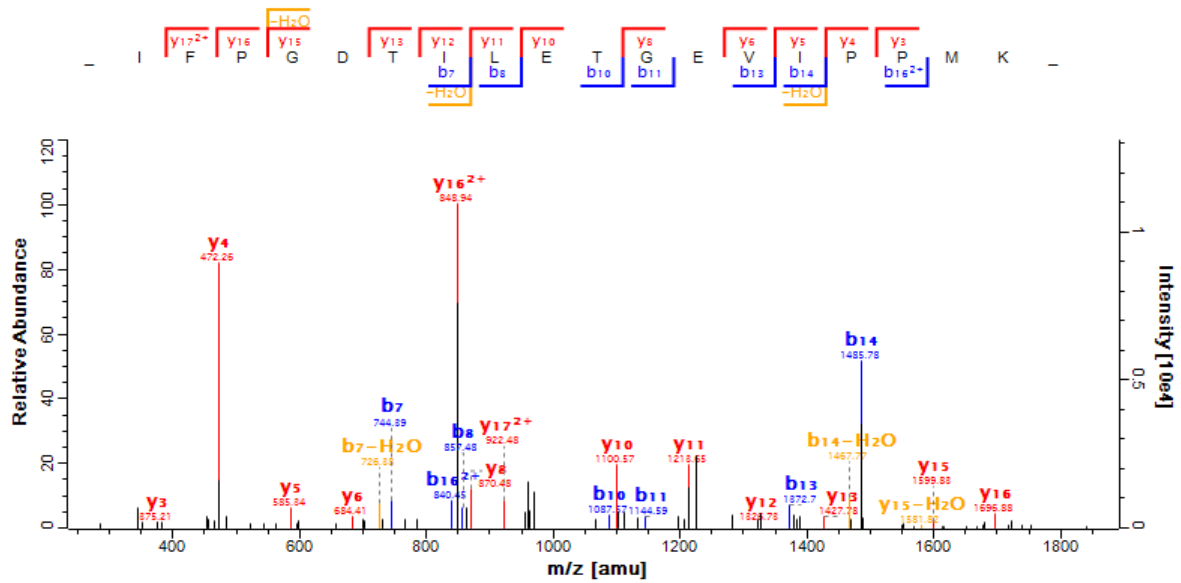



**Protein Group ID:** 2029  
**Protein Accession Numbers:** O95210  
**Gene Names:** STBD1  
**Peptide Sequence:** EHVPSGQFPDTEAPATSETSNSR  
**Total Number of Spectra:** 12  
**Number of Replicates (out of 8):** 7  
**Best Match Score:** 124.69  
**Best Match Posterior Error Probability:** 2.97E-11  
**Best Match Spectrum:**

**Scan number** 25804      **Raw file** A549-US-Mock-top20CID-Elite-2ug-B13  
**Method** ITMS; CID      **Genenames** STBD1

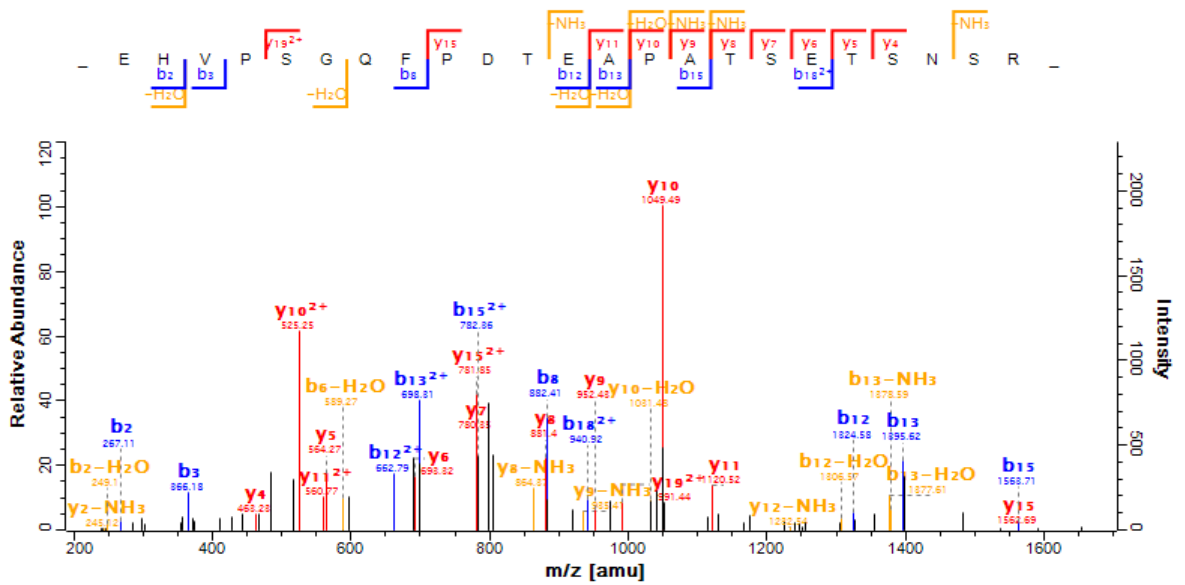

**Protein Group ID:** 2055  
**Protein Accession Numbers:** O95479  
**Gene Names:** H6PD  
**Peptide Sequence:** GSAVVGQYQSYSEQR  
**Total Number of Spectra:** 1  
**Number of Replicates (out of 8):** 1  
**Best Match Score:** 95.428  
**Best Match Posterior Error Probability:** 0.0030653  
**Best Match Spectrum:**

**Scan number** 30552      **Raw file** A549-US-Mock-top20CID-Elite-2ug-B13  
**Method** ITMS; CID      **Genenames** H6PD

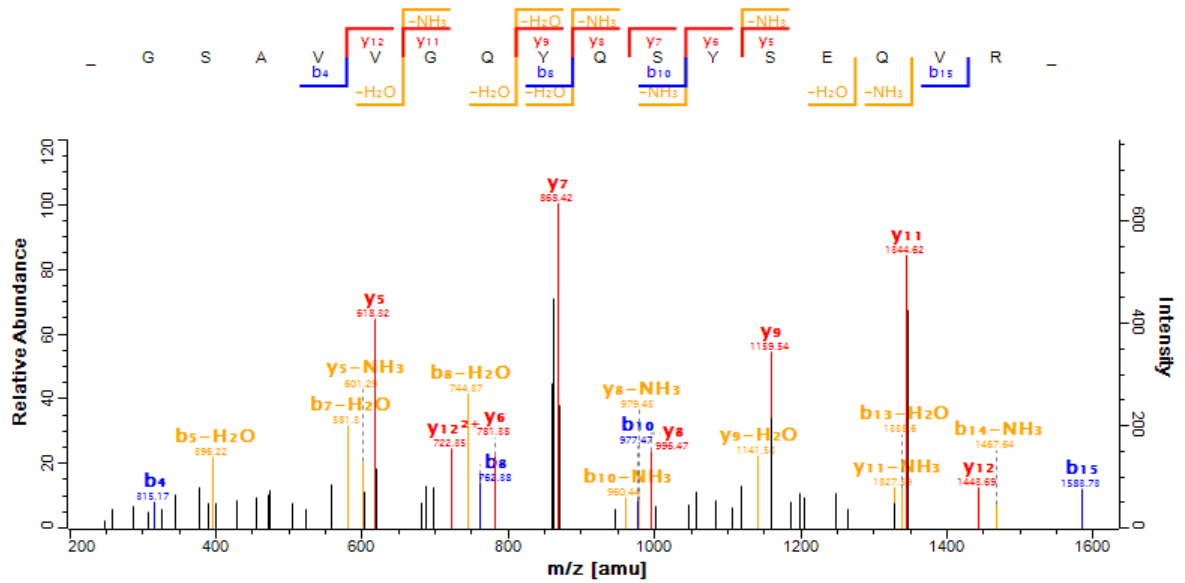

**Protein Group ID:** 2058  
**Protein Accession Numbers:** O95563; Q5R3B4  
**Gene Names:** BRP44  
**Peptide Sequence:** TVFFWAPIMK  
**Total Number of Spectra:** 4  
**Number of Replicates (out of 8):** 4  
**Best Match Score:** 109.29  
**Best Match Posterior Error Probability:** 0.00037245  
**Best Match Spectrum:**

|                    |           |                  |                                   |
|--------------------|-----------|------------------|-----------------------------------|
| <b>Scan number</b> | 78725     | <b>Raw file</b>  | A549-US-WT-top20CID-Elite-2ug-B11 |
| <b>Method</b>      | ITMS; CID | <b>Genenames</b> | BRP44                             |

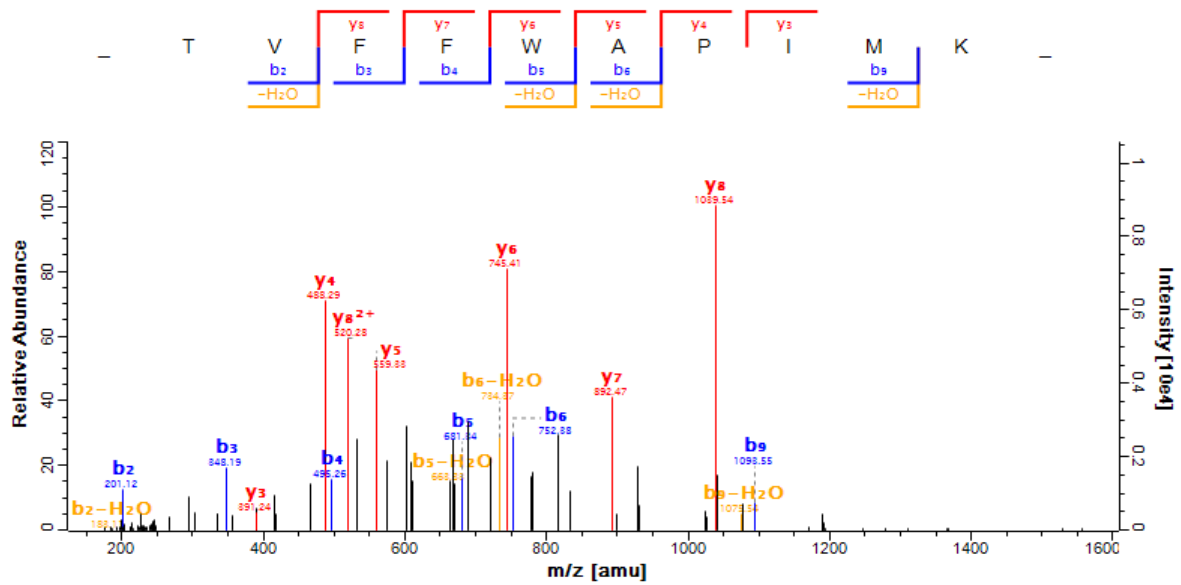

**Protein Group ID:** 2067  
**Protein Accession Numbers:** O95716  
**Gene Names:** RAB3D  
**Peptide Sequence:** MNESLEPSSSSGSNGK  
**Total Number of Spectra:** 2  
**Number of Replicates (out of 8):** 2  
**Best Match Score:** 118.21  
**Best Match Posterior Error Probability:** 0.00045235  
**Best Match Spectrum:**

**Scan number** 11473      **Raw file** A549-US-Mock-top20CID-Elite-2ug-B11  
**Method** ITMS; CID      **Genenames** RAB3D

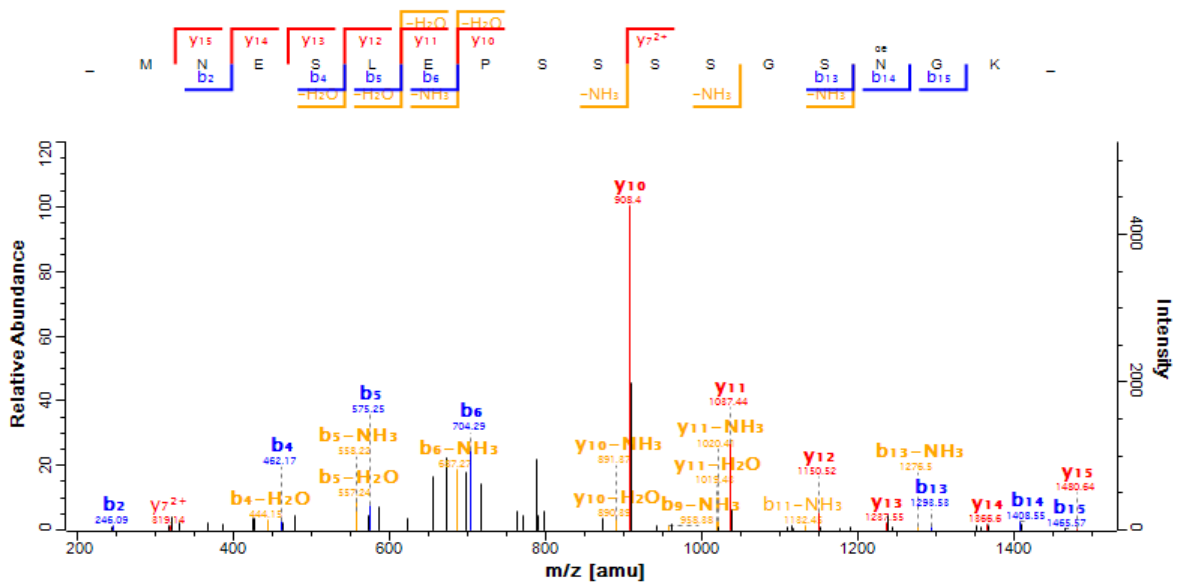

**Protein Group ID:** 2082

**Protein Accession Numbers:** O95926

**Gene Names:** SYF2

**Peptide Sequence:** AAIAASEVLVDSAEEGSLAAAELAAQK

**Total Number of Spectra:** 2

**Number of Replicates (out of 8):** 2

**Best Match Score:** 119.34

**Best Match Posterior Error Probability:** 1.05E-12

**Best Match Spectrum:**

**Scan number** 93179      **Raw file** A549-US-Mock-top20CID-Elite-2ug-B11  
**Method** ITMS; CID      **Genenames** SYF2

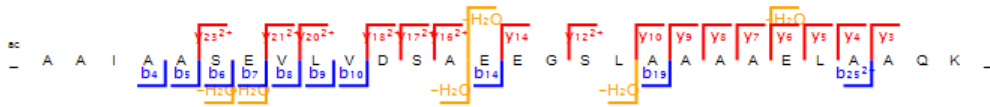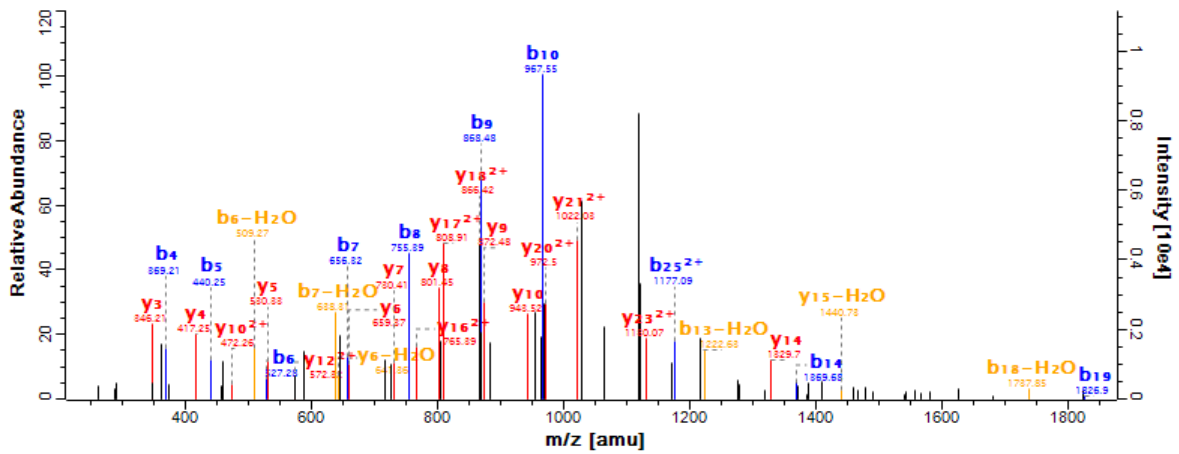



**Protein Group ID:** 2083  
**Protein Accession Numbers:** O95989  
**Gene Names:** NUDT3  
**Peptide Sequence:** WIVPGGMEPEEEPSVAAVR  
**Total Number of Spectra:** 3  
**Number of Replicates (out of 8):** 3  
**Best Match Score:** 83.423  
**Best Match Posterior Error Probability:** 0.00037585  
**Best Match Spectrum:**

**Scan number** 56506      **Raw file** A549-US-Mock-top20CID-Elite-2ug-B11  
**Method** ITMS; CID      **Genenames** NUDT3

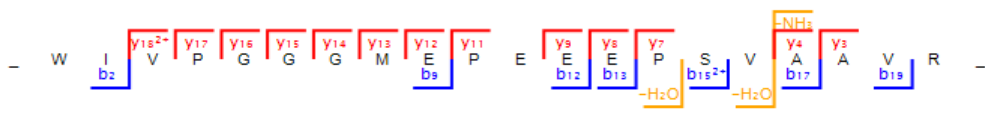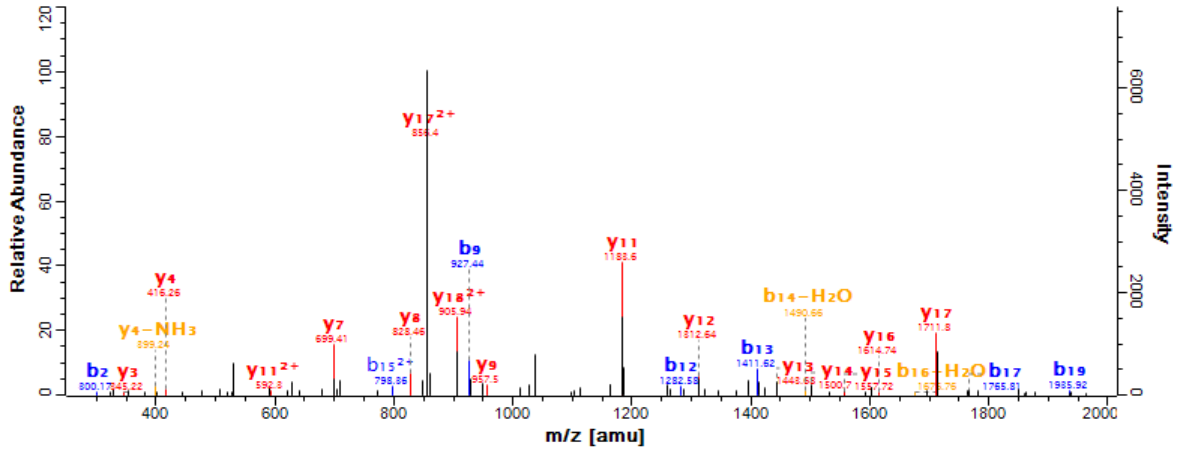

**Protein Group ID:** 2098

**Protein Accession Numbers:** P00395

**Gene Names:** MT-CO1

**Peptide Sequence:** VLMVEEPPSMNLEWLYGCPPPYHTFEPEPVMK

**Total Number of Spectra:** 10

**Number of Replicates (out of 8):** 5

**Best Match Score:** 76.799

**Best Match Posterior Error Probability:** 2.91E-06

**Best Match Spectrum:**

**Scan number** 87483      **Raw file** A549-US-WT-top20CID-Elite-2ug-B14  
**Method** ITMS; CID      **Genenames** MT-CO1

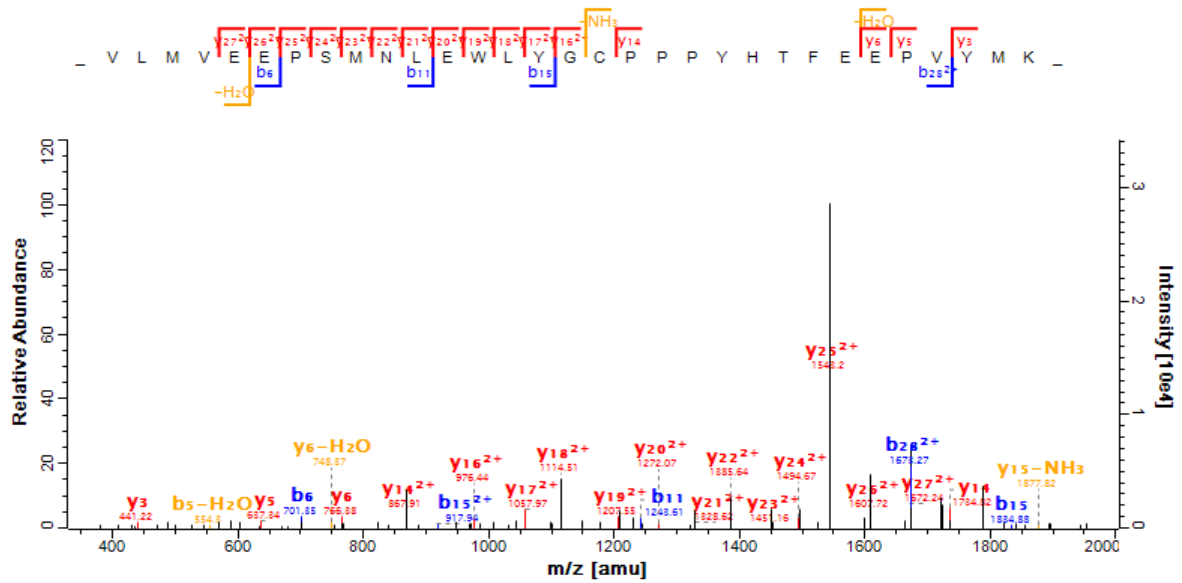

**Protein Group ID:** 2100  
**Protein Accession Numbers:** P00414  
**Gene Names:** MT-CO3  
**Peptide Sequence:** ESTYQGHHTPPVQK  
**Total Number of Spectra:** 8  
**Number of Replicates (out of 8):** 8  
**Best Match Score:** 193.28  
**Best Match Posterior Error Probability:** 1.03E-24  
**Best Match Spectrum:**

**Scan number** 4423      **Raw file** A549-US-WT-top20CID-Elite-2ug-B13  
**Method** ITMS; CID      **Genenames** MT-CO3

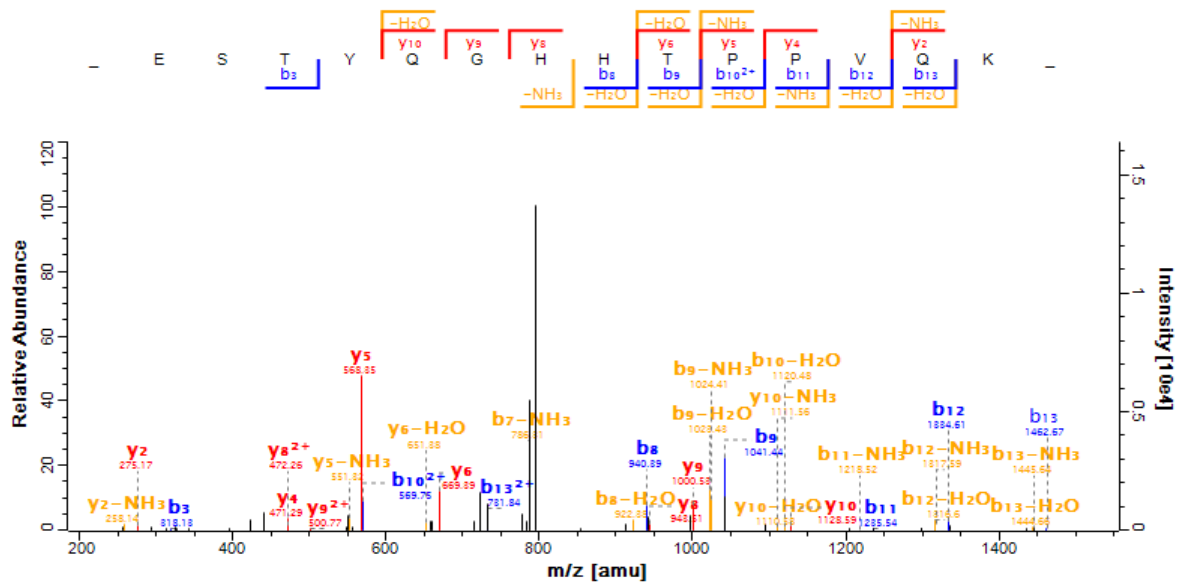

**Protein Group ID:** 2109  
**Protein Accession Numbers:** P00846  
**Gene Names:** MT-ATP6  
**Peptide Sequence:** LITTQQWLIK  
**Total Number of Spectra:** 7  
**Number of Replicates (out of 8):** 7  
**Best Match Score:** 135.86  
**Best Match Posterior Error Probability:** 8.77E-06  
**Best Match Spectrum:**

**Scan number** 53666      **Raw file** A549-US-WT-top20CID-Elite-2ug-B11  
**Method** ITMS; CID      **Genenames** MT-ATP6

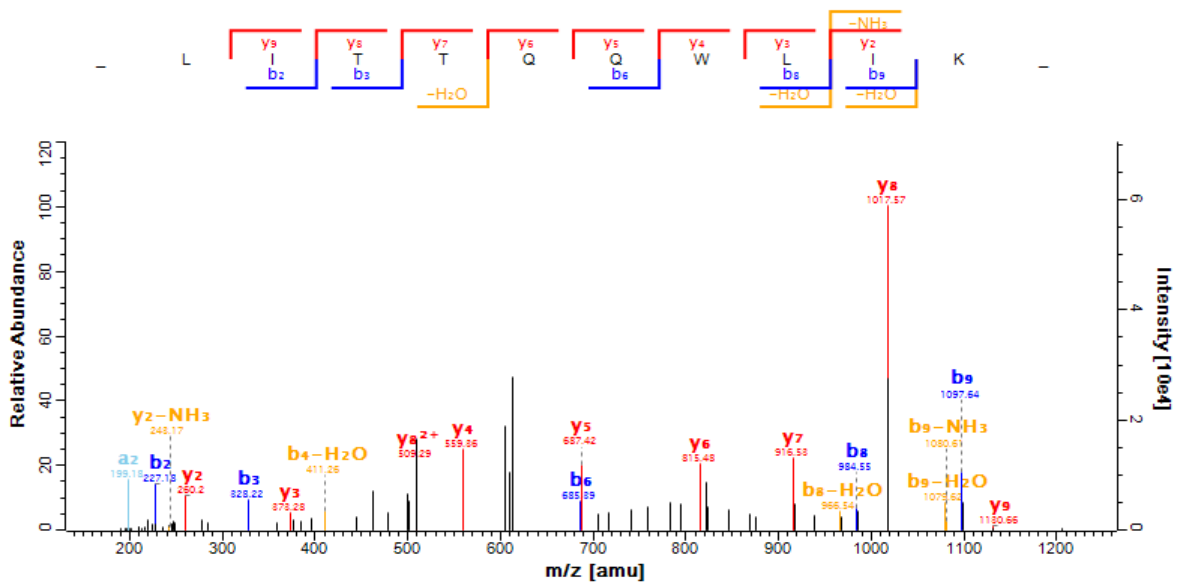

**Protein Group ID:** 2114  
**Protein Accession Numbers:** P01040  
**Gene Names:** CSTA  
**Peptide Sequence:** SLPGQNEDLVLTGYQVDK  
**Total Number of Spectra:** 2  
**Number of Replicates (out of 8):** 2  
**Best Match Score:** 104.89  
**Best Match Posterior Error Probability:** 0.00011537  
**Best Match Spectrum:**

**Scan number** 50500      **Raw file** A549-US-Mock-top20CID-Elite-2ug-B13  
**Method** ITMS; CID      **Genenames** CSTA

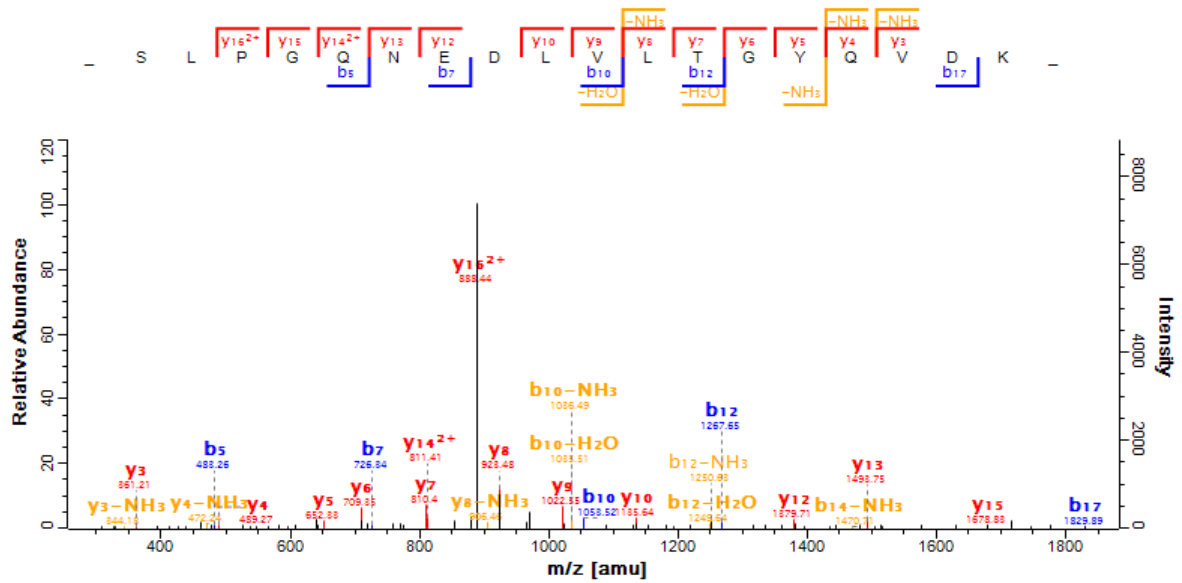

**Protein Group ID:** 2115  
**Protein Accession Numbers:** P01111  
**Gene Names:** NRAS  
**Peptide Sequence:** SFADINLYR  
**Total Number of Spectra:** 1  
**Number of Replicates (out of 8):** 1  
**Best Match Score:** 128.86  
**Best Match Posterior Error Probability:** 0.00016337  
**Best Match Spectrum:**

**Scan number** 45925      **Raw file** A549-US-Mock-top20CID-Elite-2ug-B14  
**Method** ITMS; CID      **Genenames** NRAS

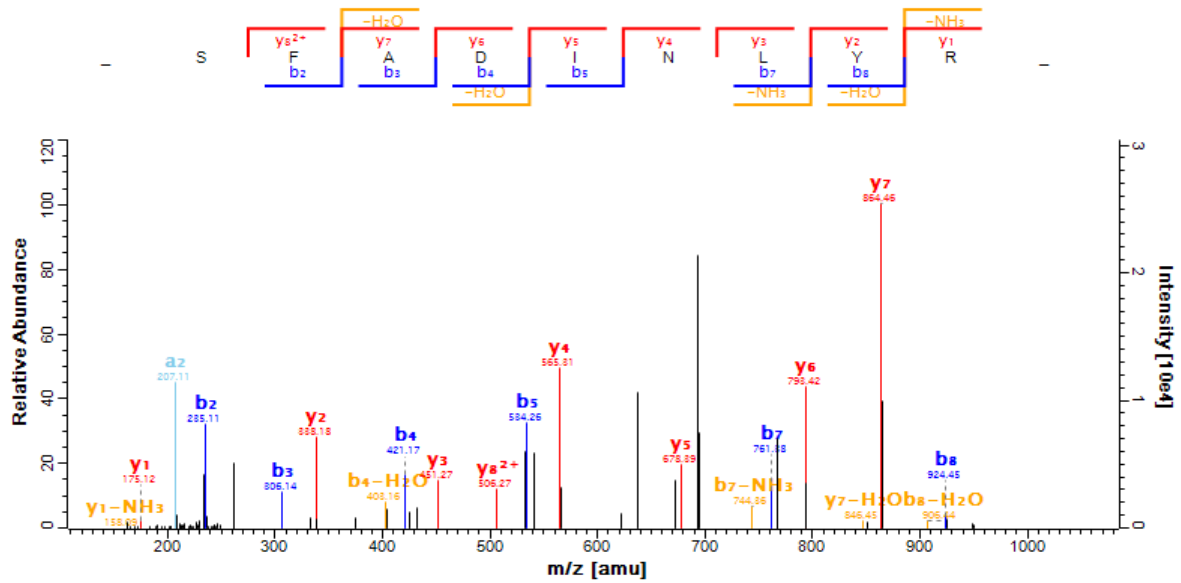

**Protein Group ID:** 2116  
**Protein Accession Numbers:** P01112; P01112-2  
**Gene Names:** HRAS  
**Peptide Sequence:** SFEDIHQYR  
**Total Number of Spectra:** 1  
**Number of Replicates (out of 8):** 1  
**Best Match Score:** 121.73  
**Best Match Posterior Error Probability:** 0.00032853  
**Best Match Spectrum:**

**Scan number** 19705      **Raw file** A549-US-Mock-top20CID-Elite-2ug-B11  
**Method** ITMS; CID      **Genenames** HRAS

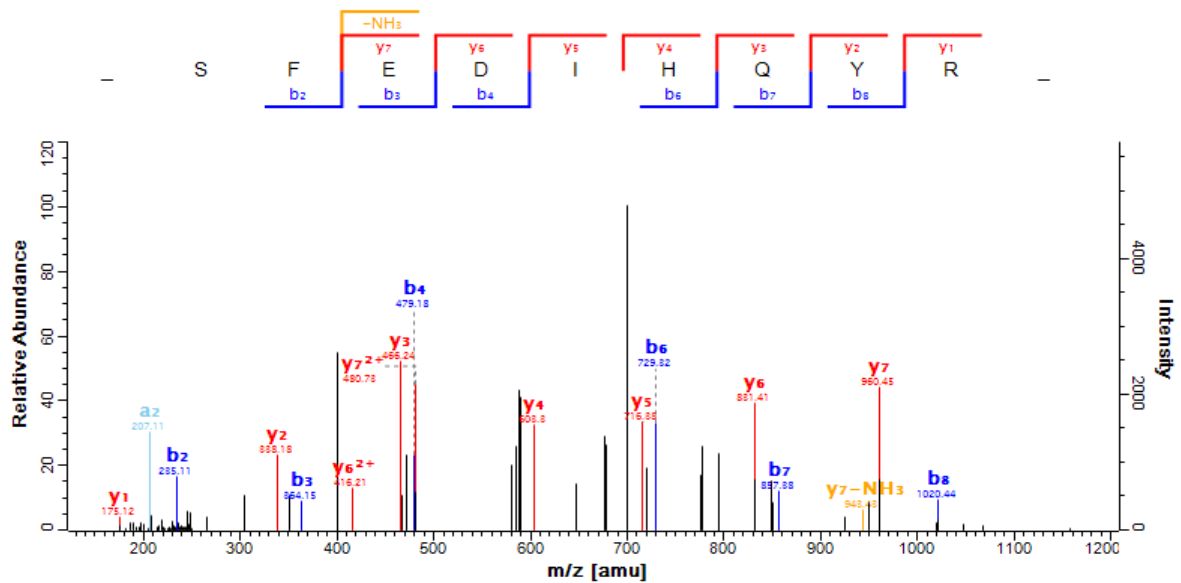

**Protein Group ID:** 2118  
**Protein Accession Numbers:** P01834  
**Gene Names:** IGKC  
**Peptide Sequence:** VDNALQSGNSQESVTEQDSK  
**Total Number of Spectra:** 1  
**Number of Replicates (out of 8):** 1  
**Best Match Score:** 99.409  
**Best Match Posterior Error Probability:** 0.00011482  
**Best Match Spectrum:**

**Scan number** 15624      **Raw file** A549-US-Mock-top20CID-Elite-2ug-B12  
**Method** ITMS; CID      **Genenames** IGKC

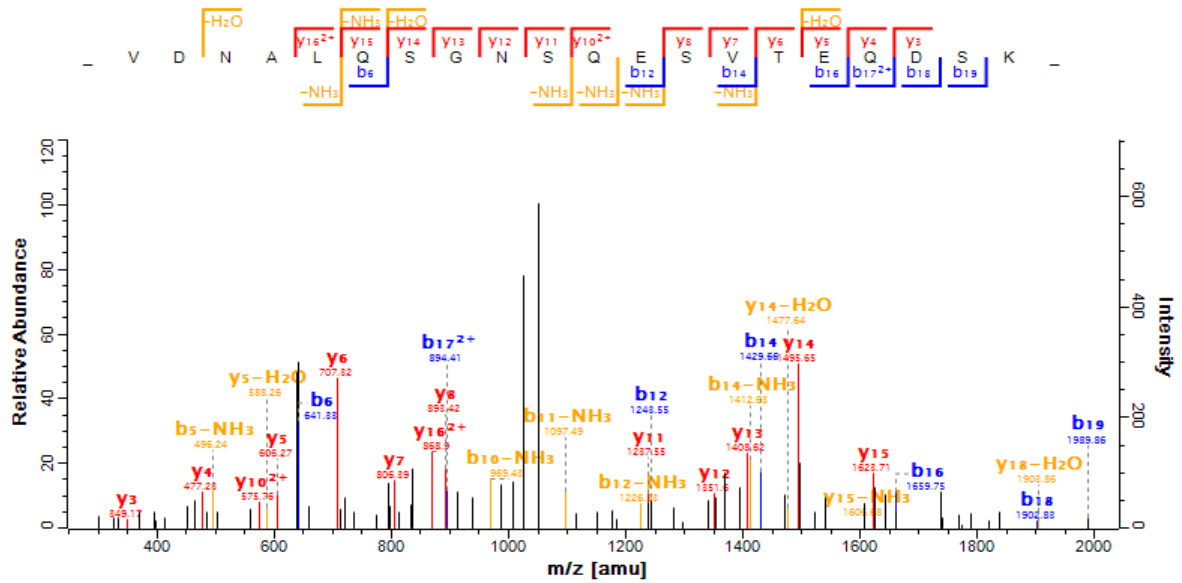



**Protein Group ID:** 2119  
**Protein Accession Numbers:** P02462; P02462-2  
**Gene Names:** COL4A1  
**Peptide Sequence:** HSQTIDDPQCPSGTK  
**Total Number of Spectra:** 1  
**Number of Replicates (out of 8):** 1  
**Best Match Score:** 174.59  
**Best Match Posterior Error Probability:** 2.68E-14  
**Best Match Spectrum:**

**Scan number** 7577      **Raw file** A549-US-WT-top20CID-Elite-2ug-B12  
**Method** ITMS; CID      **Genenames** COL4A1

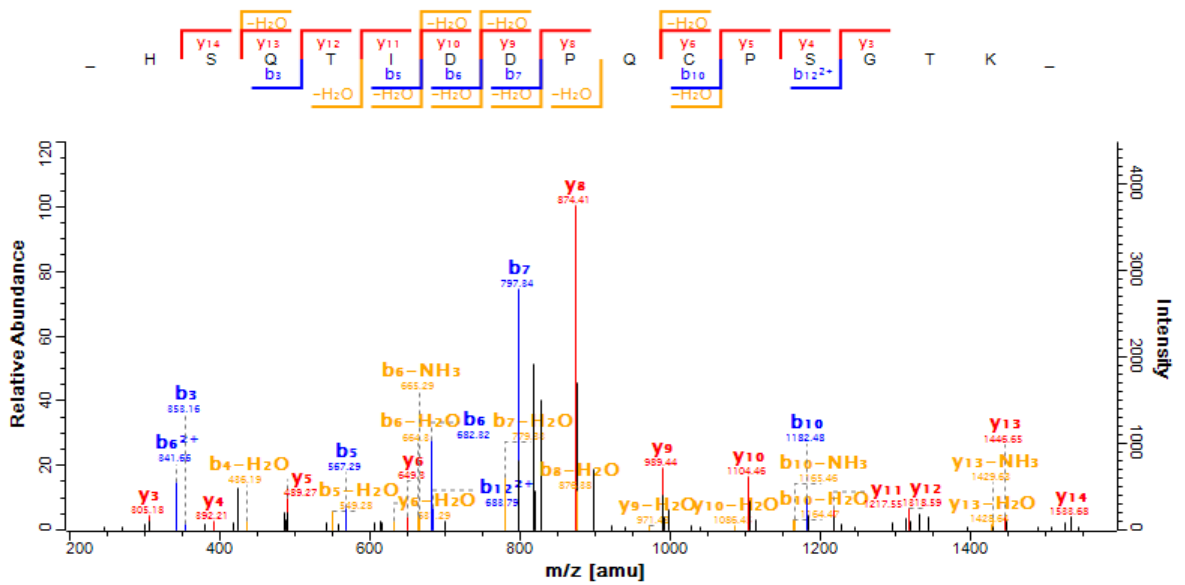

**Protein Group ID:** 2122  
**Protein Accession Numbers:** P02671; P02671-2  
**Gene Names:** FGA  
**Peptide Sequence:** DSHSLTTNIMEILR  
**Total Number of Spectra:** 1  
**Number of Replicates (out of 8):** 1  
**Best Match Score:** 82.202  
**Best Match Posterior Error Probability:** 0.0027053  
**Best Match Spectrum:**

**Scan number** 68997      **Raw file** A549-US-Mock-top20CID-Elite-2ug-B11  
**Method** ITMS; CID      **Genenames** FGA

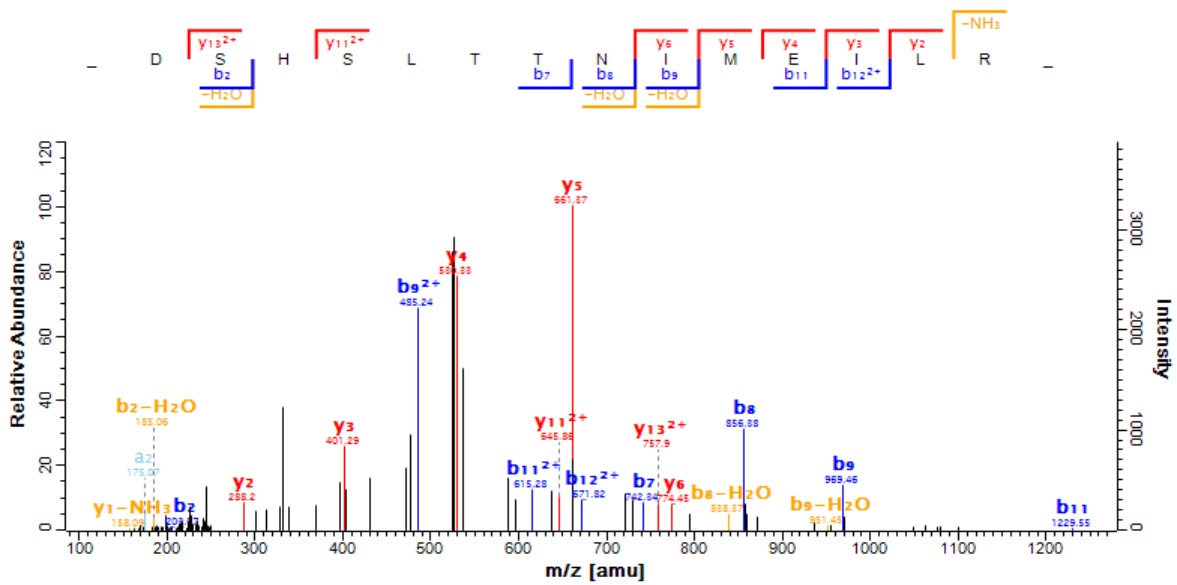

**Protein Group ID:** 2123  
**Protein Accession Numbers:** P02778  
**Gene Names:** CXCL10  
**Peptide Sequence:** CTCISISNQVPNQR  
**Total Number of Spectra:** 2  
**Number of Replicates (out of 8):** 2  
**Best Match Score:** 92.039  
**Best Match Posterior Error Probability:** 0.0010033  
**Best Match Spectrum:**

**Scan number** 28139      **Raw file** A549-US-WT-top20CID-Elite-2ug-B11  
**Method** ITMS; CID      **Genenames** CXCL10

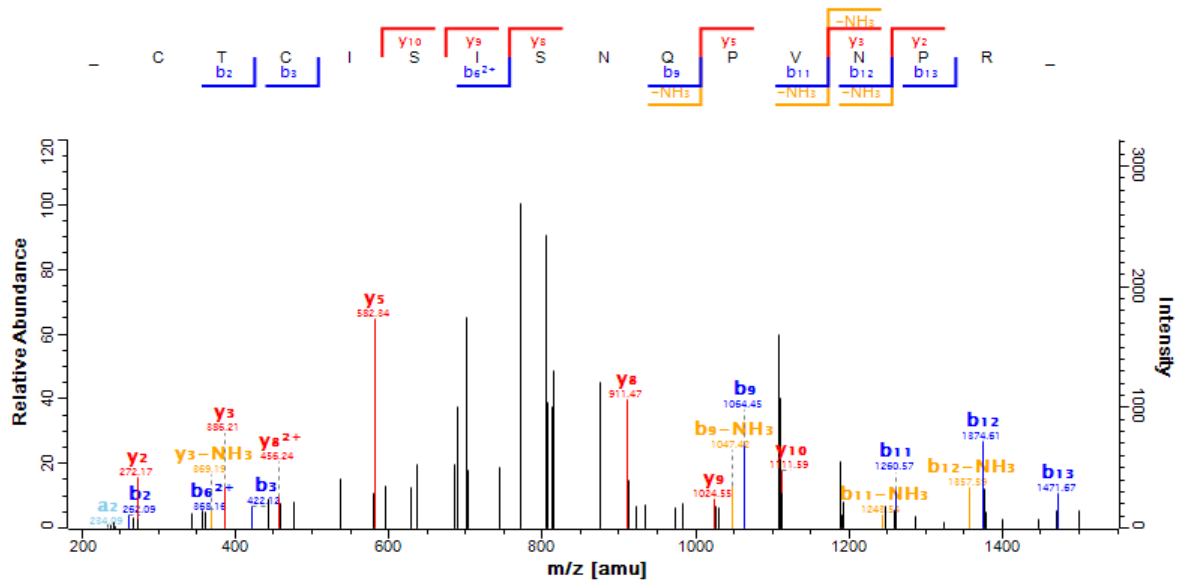

**Protein Group ID:** 2128  
**Protein Accession Numbers:** P02795; H3BSP9  
**Gene Names:** MT2A  
**Peptide Sequence:** MDPNCSCAAGDSCTCAGSCK  
**Total Number of Spectra:** 28  
**Number of Replicates (out of 8):** 8  
**Best Match Score:** 168.64  
**Best Match Posterior Error Probability:** 8.69E-17  
**Best Match Spectrum:**

**Scan number** 9607      **Raw file** A549-US-Mock-top20CID-Elite-2ug-B13  
**Method** ITMS; CID      **Genenames** MT2A

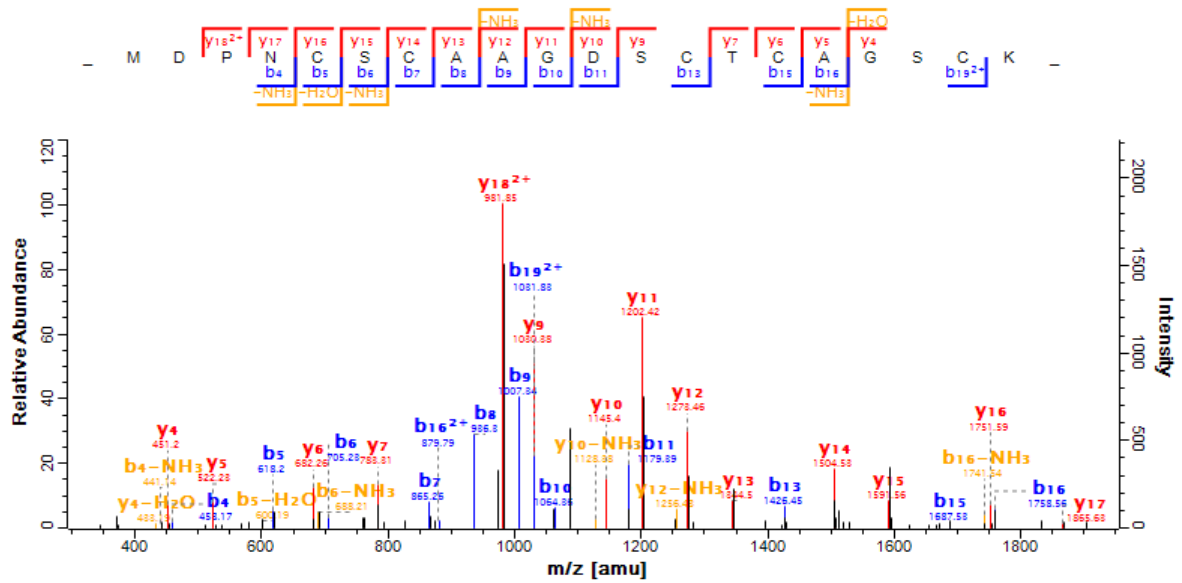

**Protein Group ID:** 2134  
**Protein Accession Numbers:** P03886  
**Gene Names:** MT-ND1  
**Peptide Sequence:** KGPNVVGPLYGLLQPLFADAMK  
**Total Number of Spectra:** 5  
**Number of Replicates (out of 8):** 5  
**Best Match Score:** 81.594  
**Best Match Posterior Error Probability:** 0.0010829  
**Best Match Spectrum:**

**Scan number** 78094      **Raw file** A549-US-Mock-top20CID-Elite-2ug-B12  
**Method** ITMS; CID      **Genenames** MT-ND1

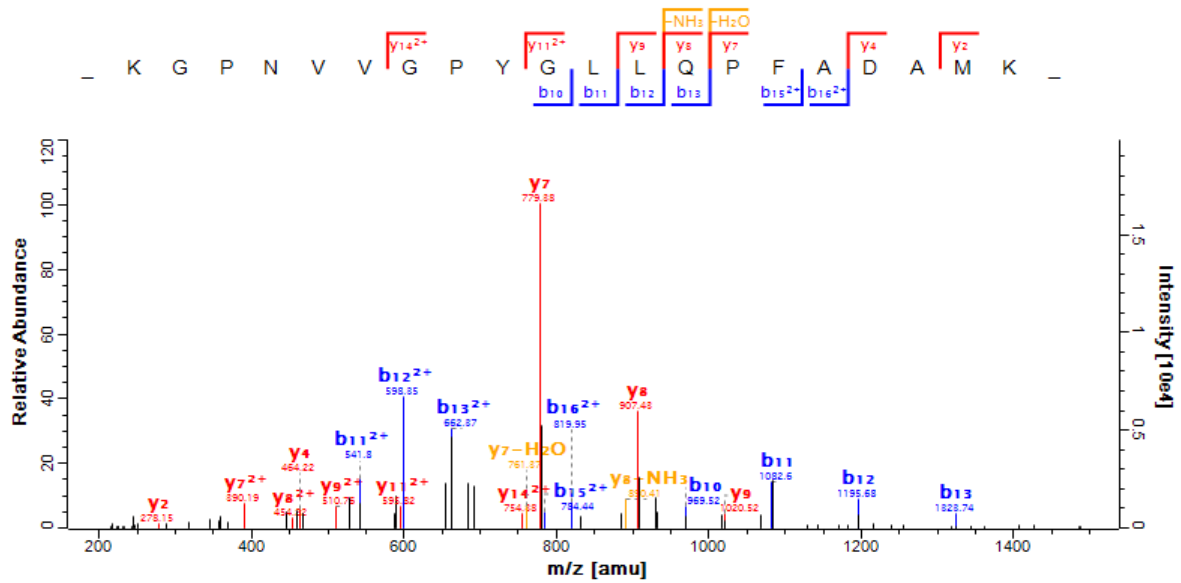

**Protein Group ID:** 2155

**Protein Accession Numbers:** P04908; Q7L7L0; Q93077

**Gene Names:** HIST1H2AB;HIST3H2A;HIST1H2AC

**Peptide Sequence:** LLGRVTIAQGGVLPNIQAVLLLPK

**Total Number of Spectra:** 4

**Number of Replicates (out of 8):** 4

**Best Match Score:** 130.56

**Best Match Posterior Error Probability:** 5.23E-11

**Best Match Spectrum:**

|                    |           |                  |                                     |
|--------------------|-----------|------------------|-------------------------------------|
| <b>Scan number</b> | 81528     | <b>Raw file</b>  | A549-US-Mock-top20CID-Elite-2ug-B14 |
| <b>Method</b>      | ITMS; CID | <b>Genenames</b> | HIST1H2AB;HIST3H2A;HIST1H2AC        |

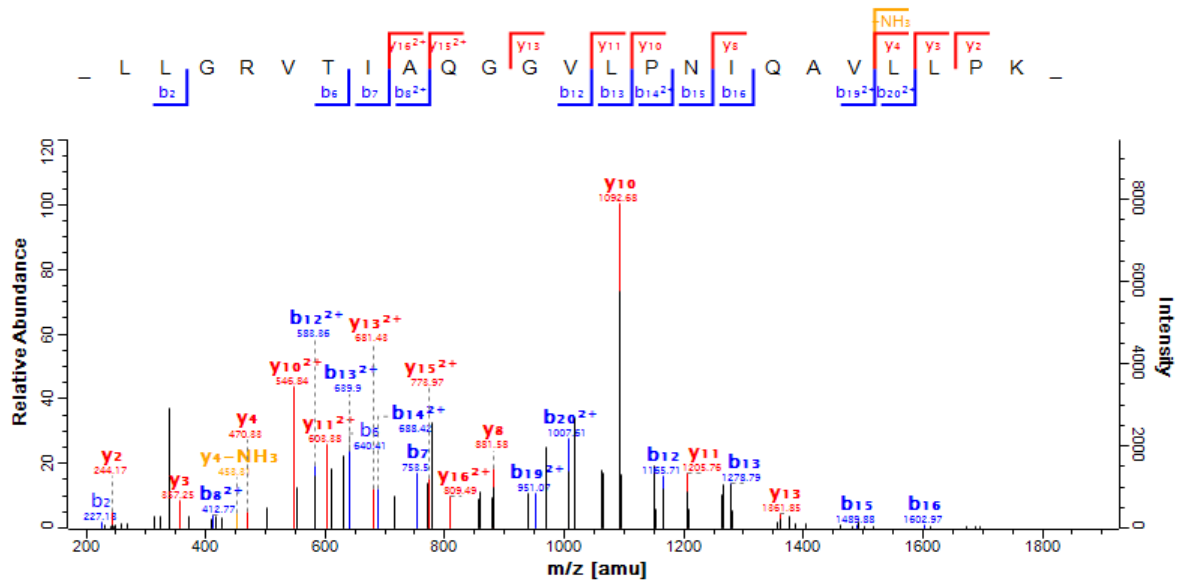

**Protein Group ID:** 2167

**Protein Accession Numbers:** P05423

**Gene Names:** POLR3D

**Peptide Sequence:** EEELLFLQLPDTLPGQPPTQDIKPIK

**Total Number of Spectra:** 3

**Number of Replicates (out of 8):** 3

**Best Match Score:** 134.86

**Best Match Posterior Error Probability:** 4.55E-18

**Best Match Spectrum:**

|                    |           |                  |                                   |
|--------------------|-----------|------------------|-----------------------------------|
| <b>Scan number</b> | 83749     | <b>Raw file</b>  | A549-US-WT-top20CID-Elite-2ug-B11 |
| <b>Method</b>      | ITMS; CID | <b>Genenames</b> | POLR3D                            |

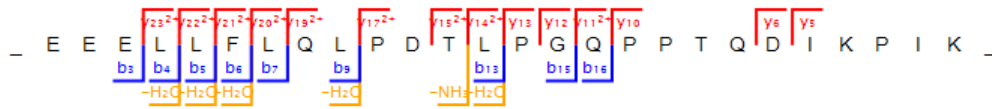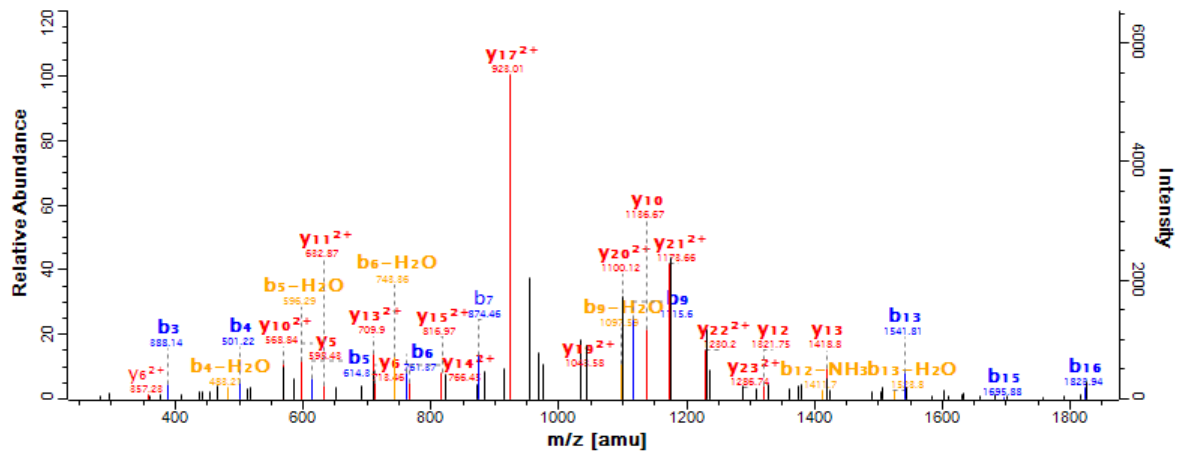

**Protein Group ID:** 2170

**Protein Accession Numbers:** P08590; P05976; P05976-2

**Gene Names:** MYL3;MYL1

**Peptide Sequence:** EGNGTVMGAELR

**Total Number of Spectra:** 3

**Number of Replicates (out of 8):** 3

**Best Match Score:** 84.365

**Best Match Posterior Error Probability:** 0.0023701

**Best Match Spectrum:**

|                    |           |                  |                                     |
|--------------------|-----------|------------------|-------------------------------------|
| <b>Scan number</b> | 21880     | <b>Raw file</b>  | A549-US-Mock-top20CID-Elite-2ug-B14 |
| <b>Method</b>      | ITMS; CID | <b>Genenames</b> | MYL3;MYL1                           |

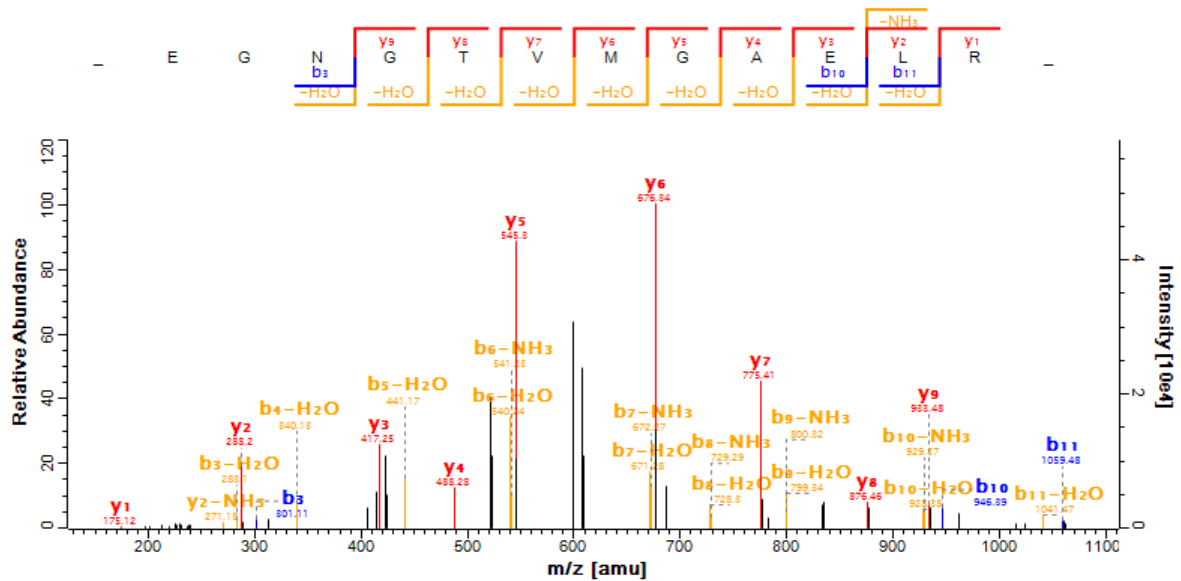



**Protein Group ID:** 2174  
**Protein Accession Numbers:** P06313; P06312; P83593  
**Gene Names:** IGKV4-1  
**Peptide Sequence:** SSQSVLYSSNNK  
**Total Number of Spectra:** 5  
**Number of Replicates (out of 8):** 5  
**Best Match Score:** 95.094  
**Best Match Posterior Error Probability:** 0.0009192  
**Best Match Spectrum:**

**Scan number** 54345      **Raw file** A549-US-Mock-top20CID-Elite-2ug-B12  
**Method** ITMS; CID      **Genenames** IGKV4-1

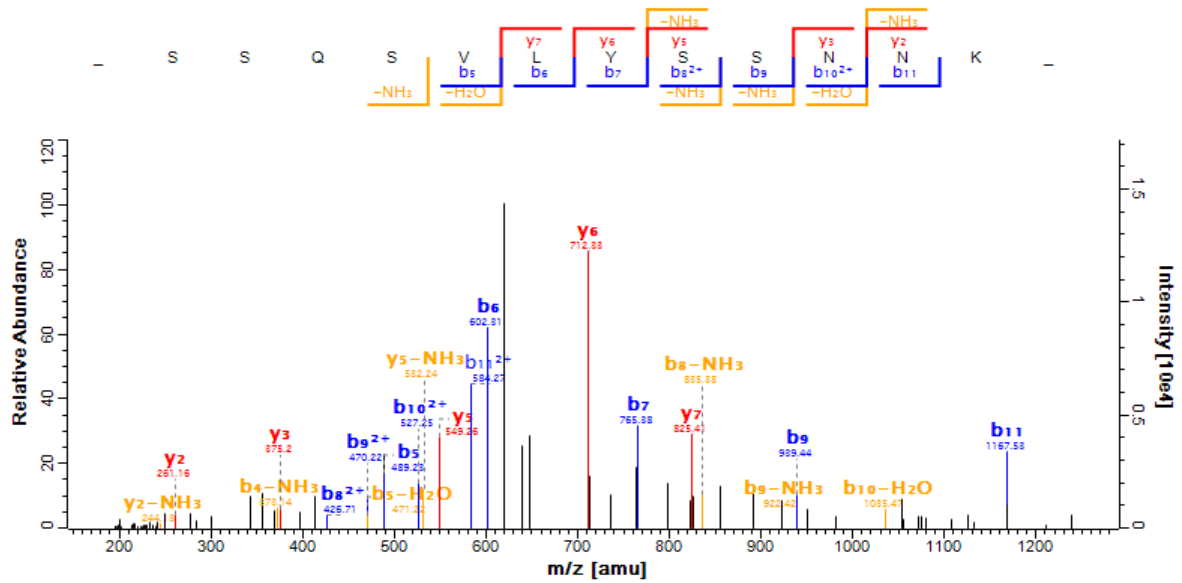

**Protein Group ID:** 2178  
**Protein Accession Numbers:** P06702  
**Gene Names:** S100A9  
**Peptide Sequence:** VIEHIMEDLDTNADK  
**Total Number of Spectra:** 2  
**Number of Replicates (out of 8):** 1  
**Best Match Score:** 138.73  
**Best Match Posterior Error Probability:** 1.70E-05  
**Best Match Spectrum:**

**Scan number** 41571      **Raw file** A549-US-WT-top20CID-Elite-2ug-B11  
**Method** ITMS; CID      **Genenames** S100A9

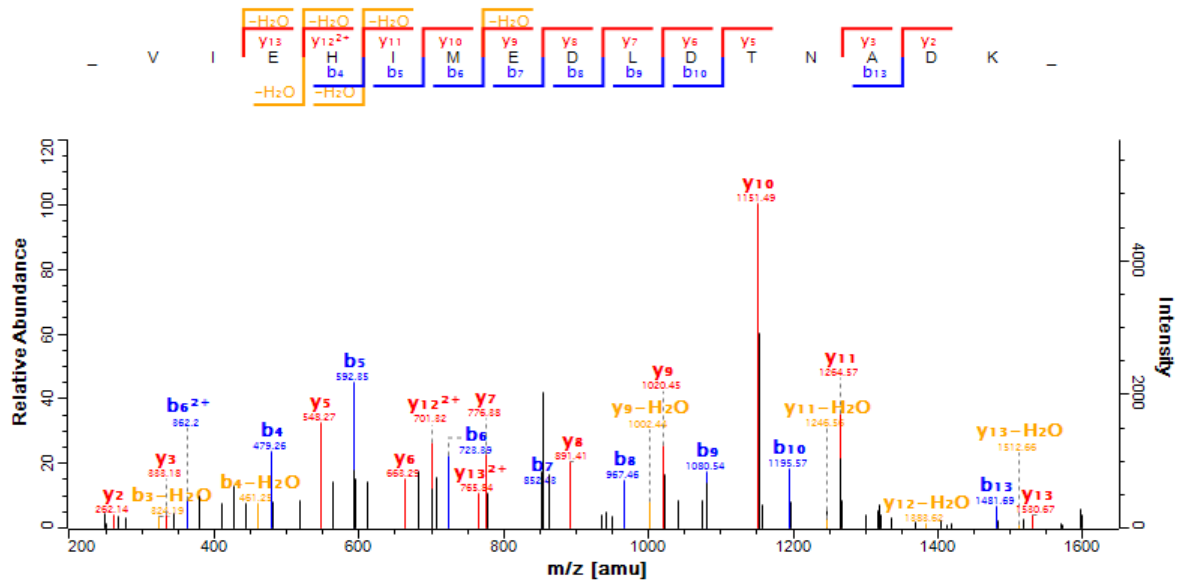

**Protein Group ID:** 2188

**Protein Accession Numbers:** P06899; P23527; P33778; Q16778; Q8N257; Q6DN03; Q6DRA6

**Gene Names:**

HIST1H2BJ; HIST1H2BO; HIST1H2BB; HIST2H2BE; HIST3H2BB; HIST2H2BC; HIST2H2BD

**Peptide Sequence:** KESYSIYVYK

**Total Number of Spectra:** 3

**Number of Replicates (out of 8):** 3

**Best Match Score:** 134.3

**Best Match Posterior Error Probability:** 1.72E-05

**Best Match Spectrum:**

**Scan number** 28164      **Raw file** A549-US-WT-top20CID-Elite-2ug-B14  
**Method** ITMS: CID      **Genenames** HIST1H2BJ; HIST1H2BO; HIST1H2BB; HIST2H2BE; HIST3H2BB; HIST2H2BC; HIST2H2BD

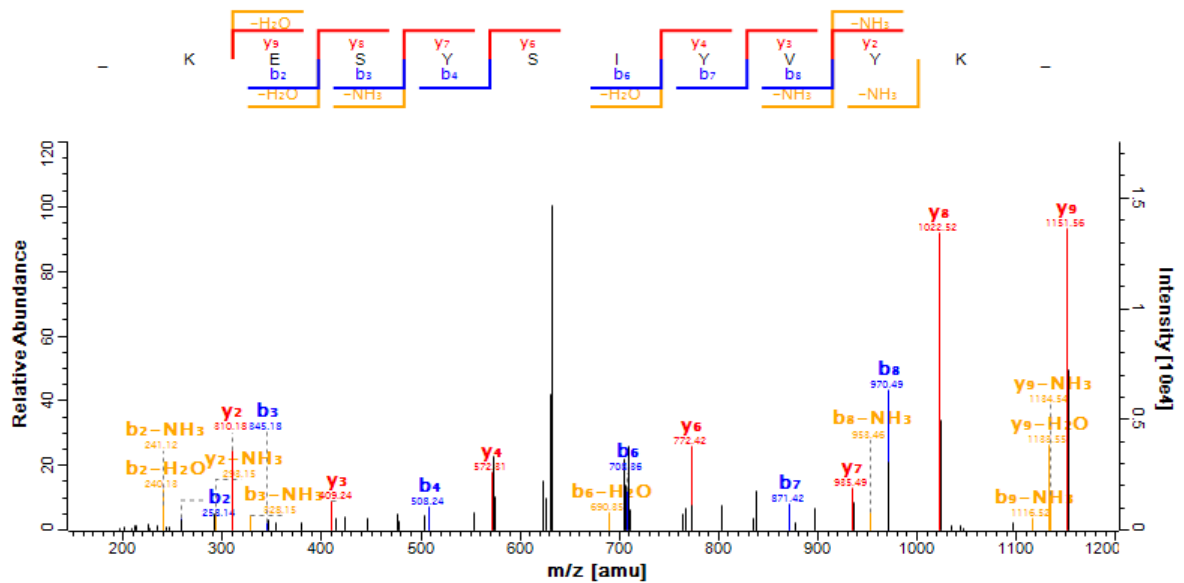

**Protein Group ID:** 2219  
**Protein Accession Numbers:** P08263; P09210  
**Gene Names:** GSTA1;GSTA2  
**Peptide Sequence:** SHGQDYLVGNK  
**Total Number of Spectra:** 4  
**Number of Replicates (out of 8):** 4  
**Best Match Score:** 109.72  
**Best Match Posterior Error Probability:** 0.00016885  
**Best Match Spectrum:**

**Scan number** 9782      **Raw file** A549-US-WT-top20CID-Elite-2ug-B12  
**Method** ITMS; CID      **Genenames** GSTA1;GSTA2

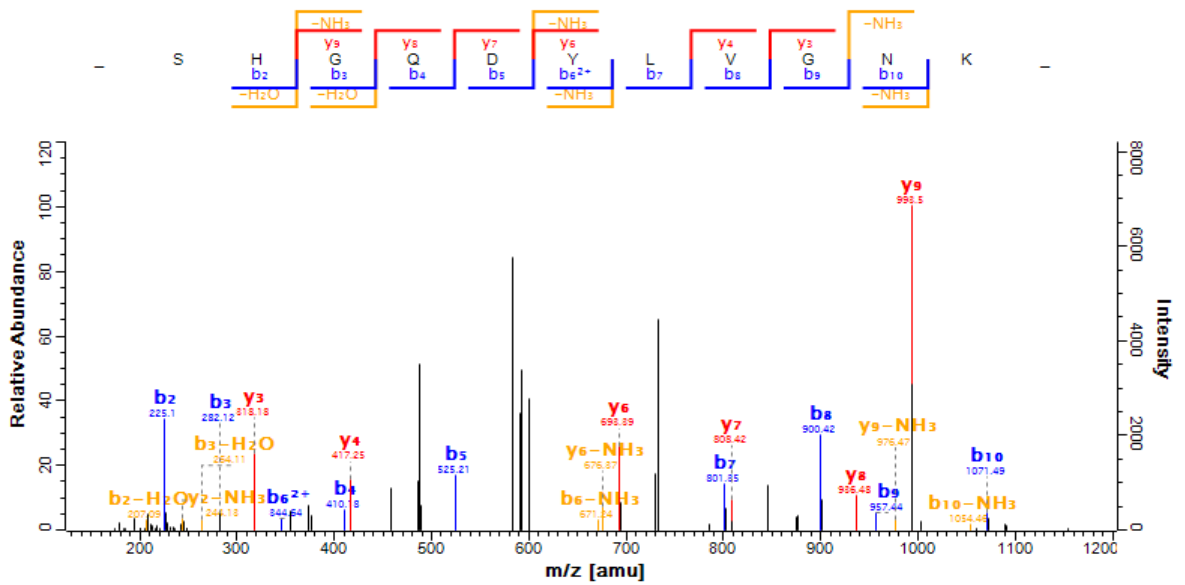

**Protein Group ID:** 2261  
**Protein Accession Numbers:** P0C2Y1  
**Gene Names:** NBPF7  
**Peptide Sequence:** VAFLLEK  
**Total Number of Spectra:** 6  
**Number of Replicates (out of 8):** 5  
**Best Match Score:** 111.04  
**Best Match Posterior Error Probability:** 0.0028296  
**Best Match Spectrum:**

**Scan number** 52409      **Raw file** A549-US-WT-top20CID-Elite-2ug-B12  
**Method** ITMS; CID      **Genenames** NBPF7

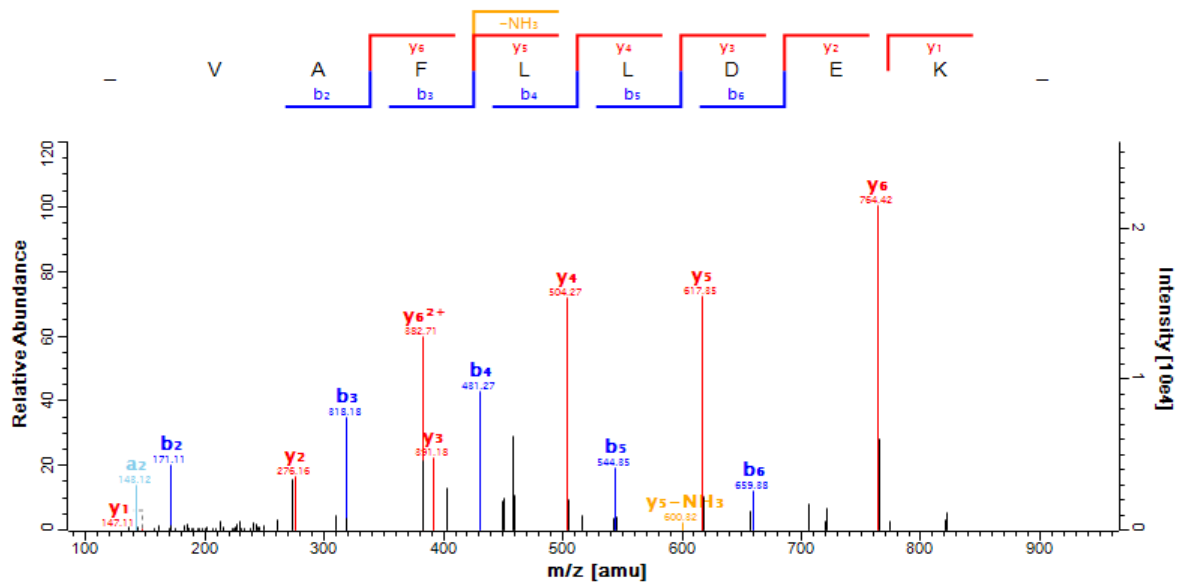

**Protein Group ID:** 2265  
**Protein Accession Numbers:** P10124  
**Gene Names:** SRGN  
**Peptide Sequence:** CNPDSNSANCLEEK  
**Total Number of Spectra:** 2  
**Number of Replicates (out of 8):** 1  
**Best Match Score:** 134.81  
**Best Match Posterior Error Probability:** 3.93E-05  
**Best Match Spectrum:**

**Scan number** 10204      **Raw file** A549-US-WT-top20CID-Elite-2ug-B13  
**Method** ITMS; CID      **Genenames** SRGN

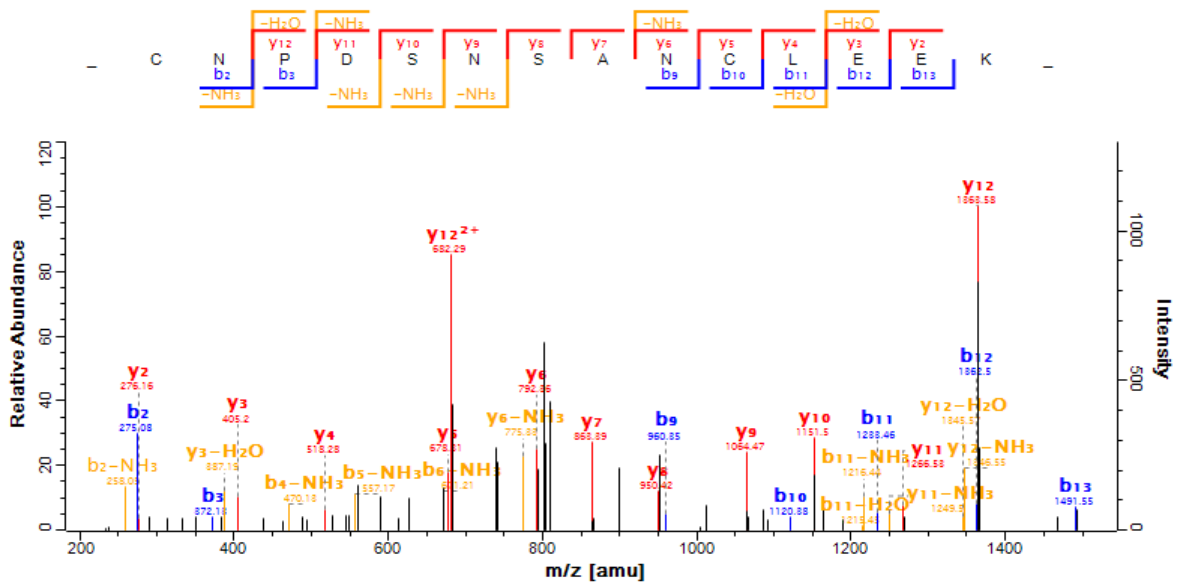

**Protein Group ID:** 2270  
**Protein Accession Numbers:** P10412  
**Gene Names:** HIST1H1E  
**Peptide Sequence:** SETAPAAPAAPAEK  
**Total Number of Spectra:** 9  
**Number of Replicates (out of 8):** 7  
**Best Match Score:** 145.69  
**Best Match Posterior Error Probability:** 2.07E-06  
**Best Match Spectrum:**

**Scan number** 15243      **Raw file** A549-US-WT-top20CID-Elite-2ug-B14  
**Method** ITMS; CID      **Genenames** HIST1H1E

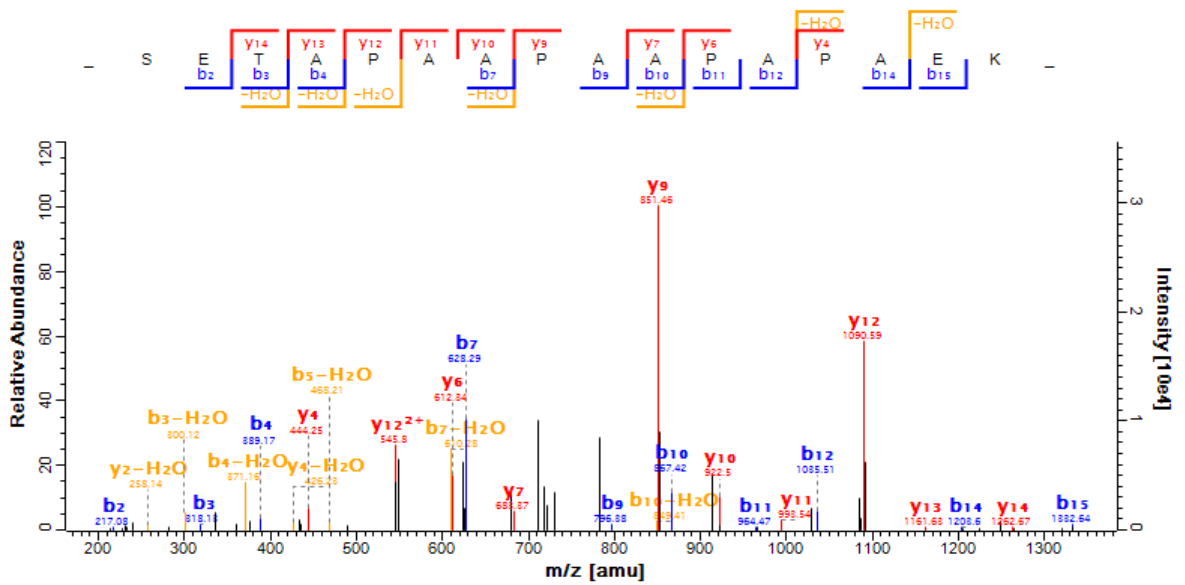

**Protein Group ID:** 2281  
**Protein Accession Numbers:** P10914  
**Gene Names:** IRF1  
**Peptide Sequence:** LLEQSEWQPTNVGDK  
**Total Number of Spectra:** 3  
**Number of Replicates (out of 8):** 3  
**Best Match Score:** 105.28  
**Best Match Posterior Error Probability:** 0.00016463  
**Best Match Spectrum:**

**Scan number** 39181      **Raw file** A549-US-WT-top20CID-Elite-2ug-B11  
**Method** ITMS; CID      **Genenames** IRF1

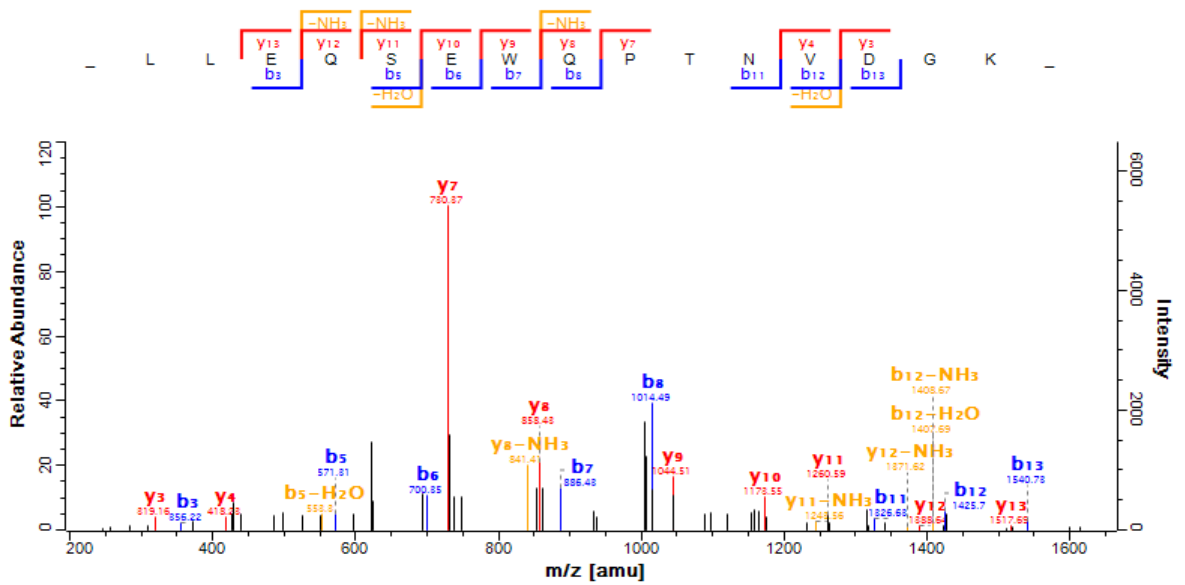



**Protein Group ID:** 2292  
**Protein Accession Numbers:** P11217; P11217-2  
**Gene Names:** PYGM  
**Peptide Sequence:** VAIQLNDTHPSLAIPELMR  
**Total Number of Spectra:** 5  
**Number of Replicates (out of 8):** 5  
**Best Match Score:** 127.75  
**Best Match Posterior Error Probability:** 6.73E-05  
**Best Match Spectrum:**

**Scan number** 71836      **Raw file** A549-US-WT-top20CID-Elite-2ug-B13  
**Method** ITMS; CID      **Genenames** PYGM

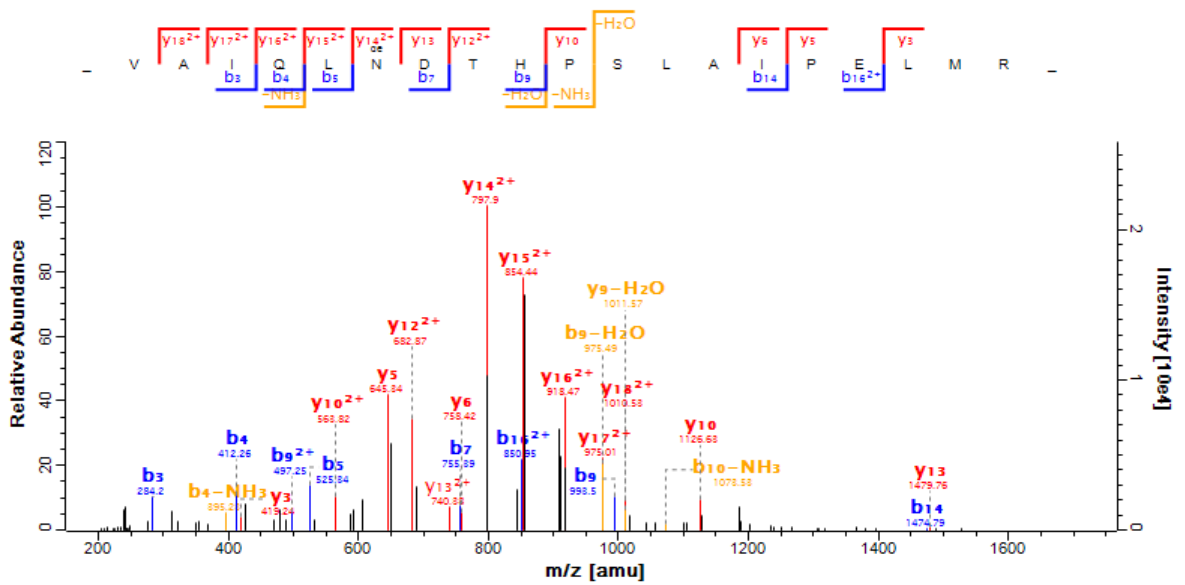

**Protein Group ID:** 2299  
**Protein Accession Numbers:** Q5HY81; P11441  
**Gene Names:** UBL4A  
**Peptide Sequence:** VLLEEGEAQR  
**Total Number of Spectra:** 1  
**Number of Replicates (out of 8):** 1  
**Best Match Score:** 96.015  
**Best Match Posterior Error Probability:** 0.0012035  
**Best Match Spectrum:**

**Scan number** 17371      **Raw file** A549-US-Mock-top20CID-Elite-2ug-B11  
**Method** ITMS; CID      **Genenames** UBL4A

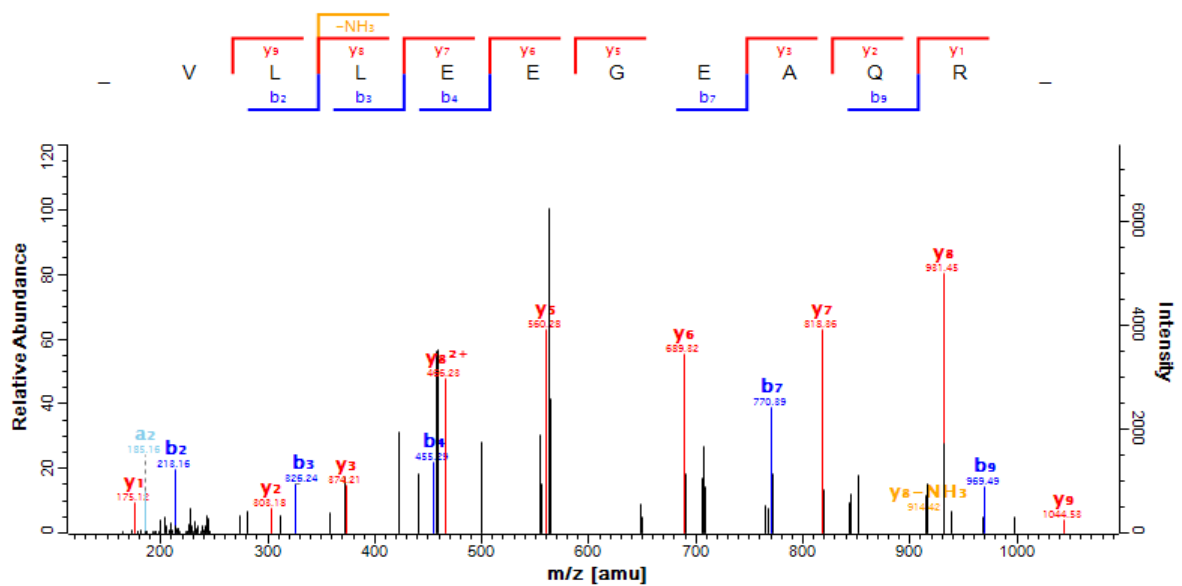



**Protein Group ID:** 2308  
**Protein Accession Numbers:** P12235  
**Gene Names:** SLC25A4  
**Peptide Sequence:** GDHAWSFLK  
**Total Number of Spectra:** 6  
**Number of Replicates (out of 8):** 6  
**Best Match Score:** 118.71  
**Best Match Posterior Error Probability:** 0.00070316  
**Best Match Spectrum:**

**Scan number** 50371      **Raw file** A549-US-Mock-top20CID-Elite-2ug-B11  
**Method** ITMS; CID      **Genenames** SLC25A4

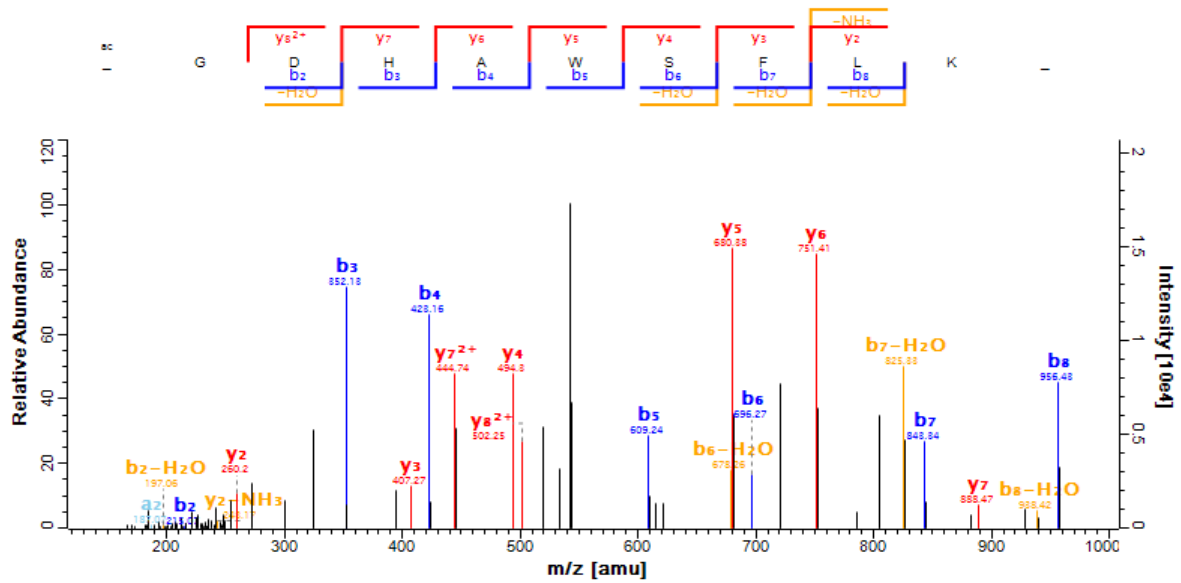

**Protein Group ID:** 2313  
**Protein Accession Numbers:** P12532-2; P12532  
**Gene Names:** CKMT1A  
**Peptide Sequence:** RGTGGVDTAATAAGVFDISNLR  
**Total Number of Spectra:** 1  
**Number of Replicates (out of 8):** 1  
**Best Match Score:** 88.951  
**Best Match Posterior Error Probability:** 5.57E-05  
**Best Match Spectrum:**

**Scan number** 52344      **Raw file** A549-US-Mock-top20CID-Elite-2ug-B11  
**Method** ITMS; CID      **Genenames** CKMT1A

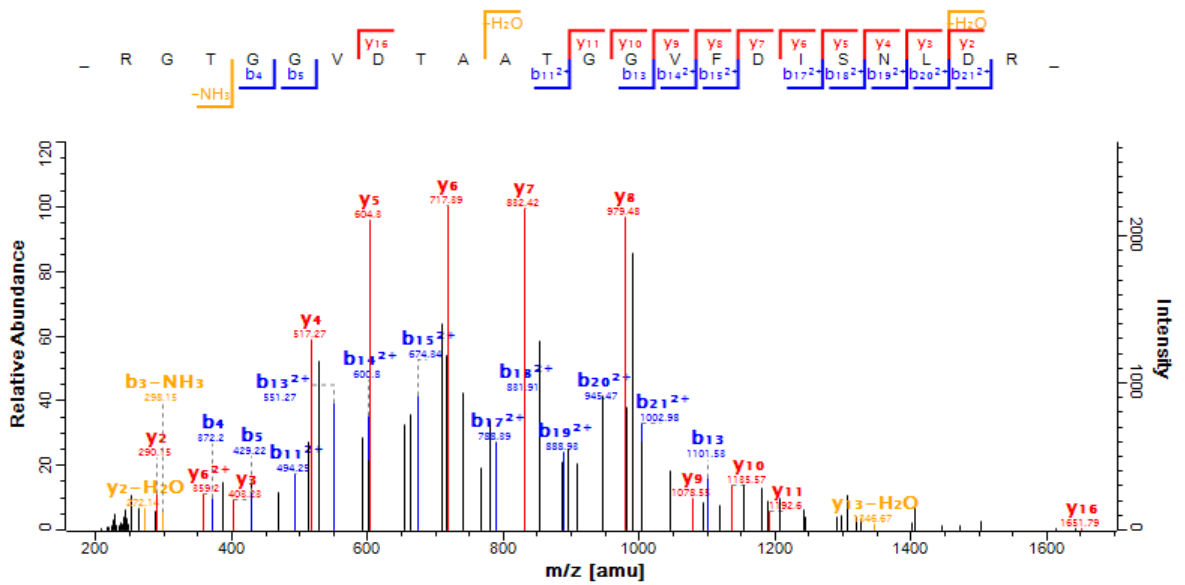

**Protein Group ID:** 2322  
**Protein Accession Numbers:** P13284  
**Gene Names:** IFI30  
**Peptide Sequence:** GMQLMHANAQR  
**Total Number of Spectra:** 1  
**Number of Replicates (out of 8):** 1  
**Best Match Score:** 108.47  
**Best Match Posterior Error Probability:** 0.00021357  
**Best Match Spectrum:**

**Scan number** 14165      **Raw file** A549-US-WT-top20CID-Elite-2ug-B13  
**Method** ITMS; CID      **Genenames** IFI30

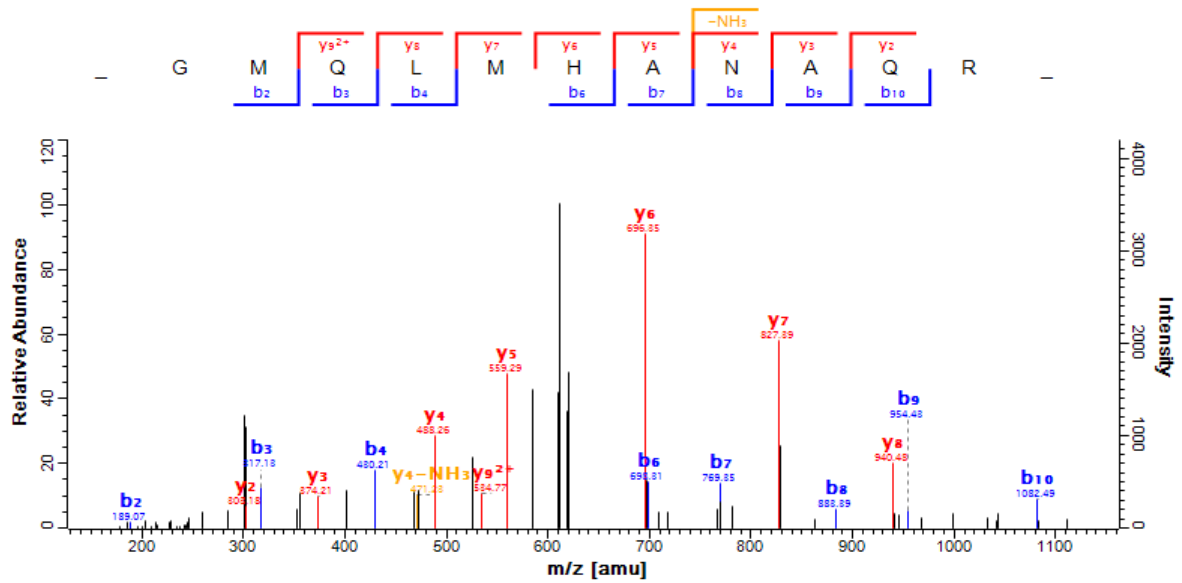

**Protein Group ID:** 2341

**Protein Accession Numbers:** P14316; P14316-2

**Gene Names:** IRF2

**Peptide Sequence:** GSYLLPGMASFVTSNKPDLQVTIK

**Total Number of Spectra:** 1

**Number of Replicates (out of 8):** 1

**Best Match Score:** 73.783

**Best Match Posterior Error Probability:** 0.0012123

**Best Match Spectrum:**

**Scan number** 77154      **Raw file** A549-US-WT-top20CID-Elite-2ug-B11  
**Method** ITMS; CID      **Genenames** IRF2

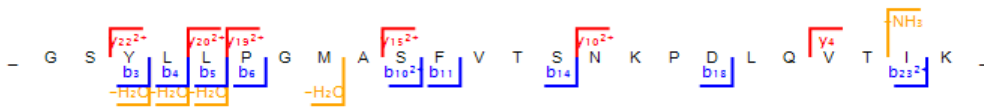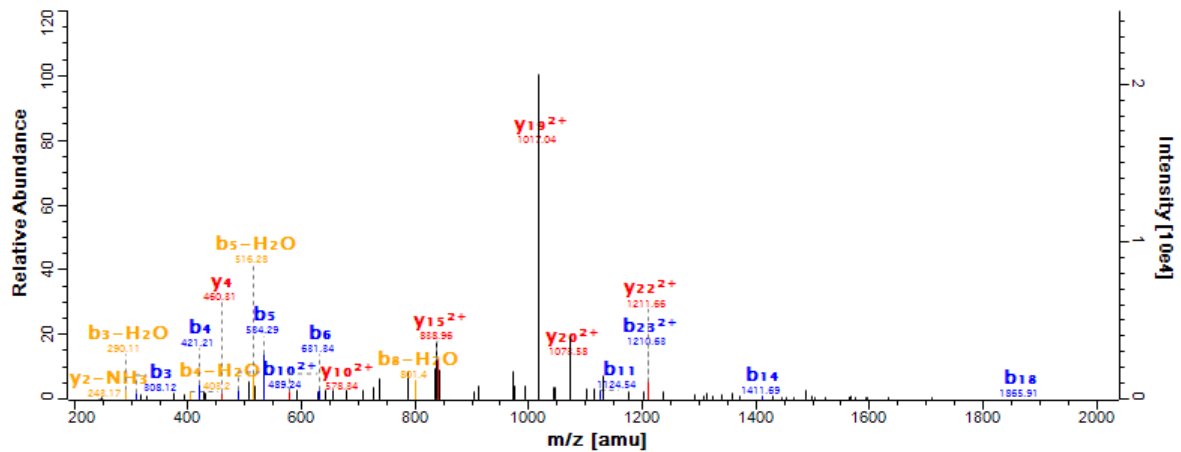

**Protein Group ID:** 2370

**Protein Accession Numbers:** P16104; Q96QV6; Q8IUE6

**Gene Names:** H2AFX;HIST1H2AA;HIST2H2AB

**Peptide Sequence:** LLGGVTIAQGGVLPNIQAVLLPK

**Total Number of Spectra:** 14

**Number of Replicates (out of 8):** 7

**Best Match Score:** 214.59

**Best Match Posterior Error Probability:** 9.50E-55

**Best Match Spectrum:**

**Scan number** 89153      **Raw file** A549-US-WT-top20CID-Elite-2ug-B14  
**Method** ITMS; CID      **Genenames** H2AFX;HIST1H2AA;HIST2H2AB

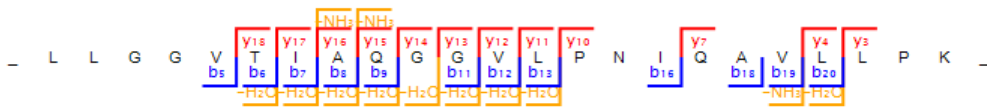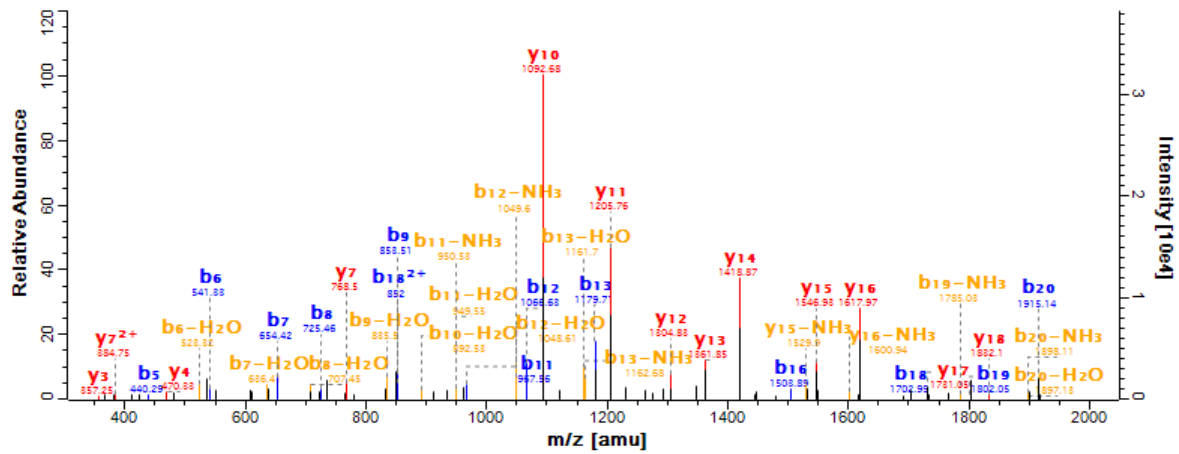



**Protein Group ID:** 2374

**Protein Accession Numbers:** P16298-4; P16298; P16298-3; P16298-2; Q5F2F8

**Gene Names:** PPP3CB

**Peptide Sequence:** IINEGAILR

**Total Number of Spectra:** 1

**Number of Replicates (out of 8):** 1

**Best Match Score:** 120.06

**Best Match Posterior Error Probability:** 0.00012445

**Best Match Spectrum:**

|                    |           |                  |                                     |
|--------------------|-----------|------------------|-------------------------------------|
| <b>Scan number</b> | 32896     | <b>Raw file</b>  | A549-US-Mock-top20CID-Elite-2ug-B11 |
| <b>Method</b>      | ITMS; CID | <b>Genenames</b> | PPP3CB                              |

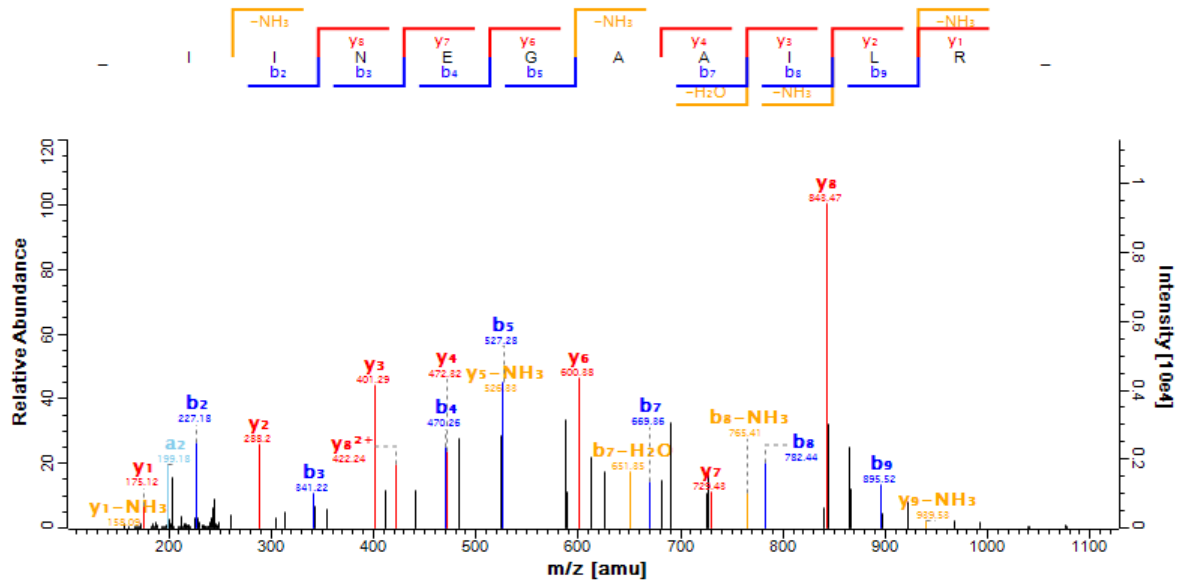

**Protein Group ID:** 2379  
**Protein Accession Numbers:** P16455  
**Gene Names:** MGMT  
**Peptide Sequence:** VVCSSGAVGNYSGGLAVK  
**Total Number of Spectra:** 1  
**Number of Replicates (out of 8):** 1  
**Best Match Score:** 168.42  
**Best Match Posterior Error Probability:** 6.14E-32  
**Best Match Spectrum:**

**Scan number** 32483      **Raw file** A549-US-Mock-top20CID-Elite-2ug-B12  
**Method** ITMS; CID      **Genenames** MGMT

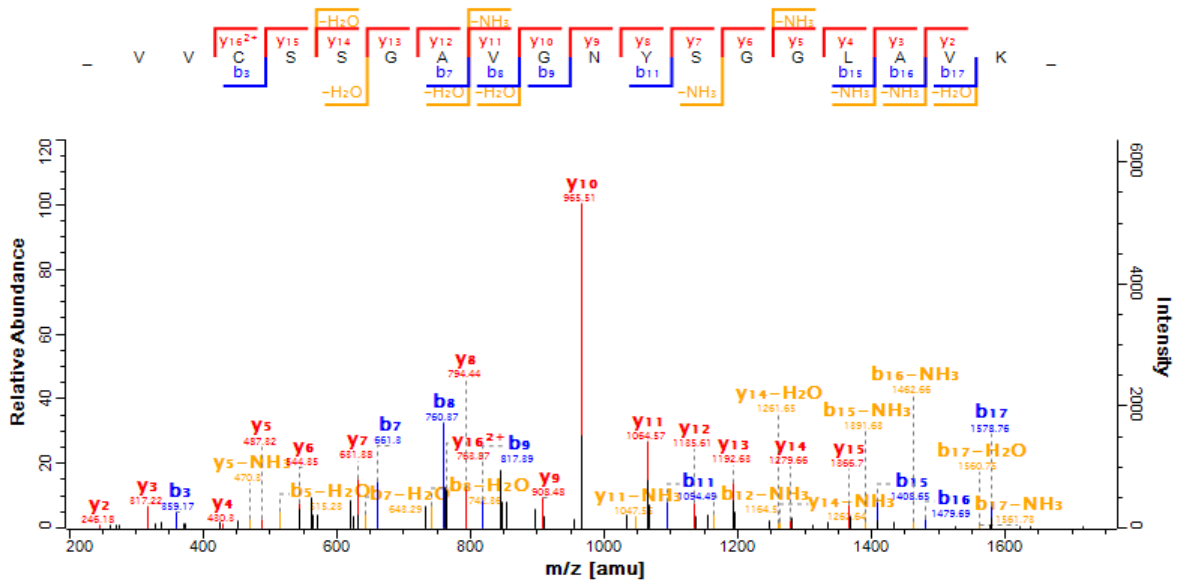

**Protein Group ID:** 2383  
**Protein Accession Numbers:** Q9C0F3; P17028  
**Gene Names:** ZNF436;ZNF24  
**Peptide Sequence:** PYECVQCGK  
**Total Number of Spectra:** 3  
**Number of Replicates (out of 8):** 3  
**Best Match Score:** 100.02  
**Best Match Posterior Error Probability:** 0.0017716  
**Best Match Spectrum:**

|                    |           |                  |                                   |
|--------------------|-----------|------------------|-----------------------------------|
| <b>Scan number</b> | 5554      | <b>Raw file</b>  | A549-US-WT-top20CID-Elite-2ug-B11 |
| <b>Method</b>      | ITMS; CID | <b>Genenames</b> | ZNF436;ZNF24                      |

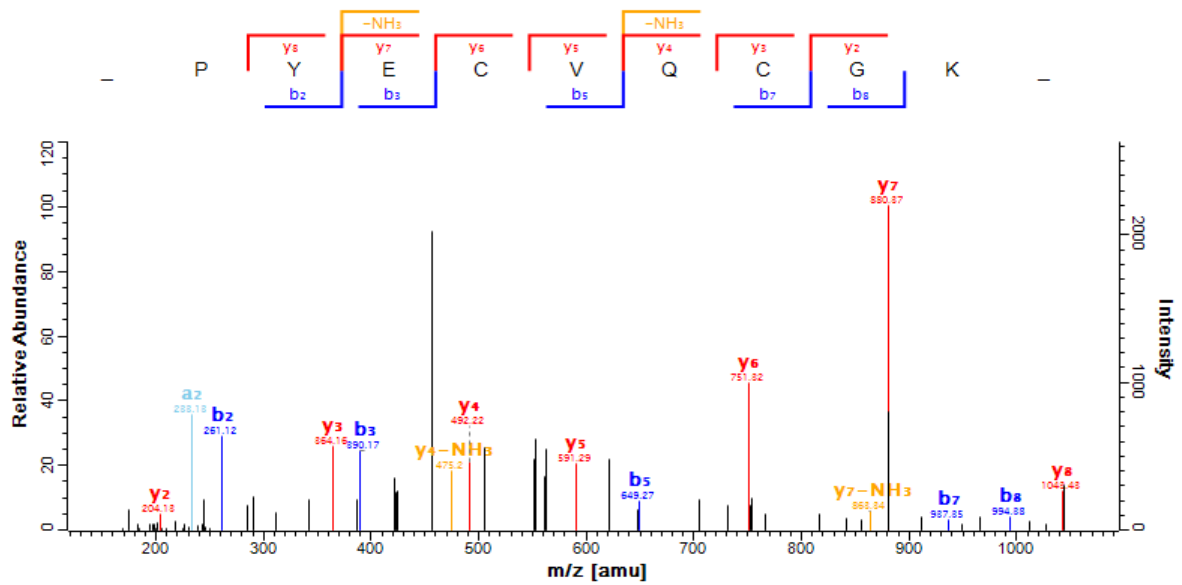

**Protein Group ID:** 2385  
**Protein Accession Numbers:** P17066; P48741  
**Gene Names:** HSPA6;HSPA7  
**Peptide Sequence:** VEILANDQGNR  
**Total Number of Spectra:** 18  
**Number of Replicates (out of 8):** 7  
**Best Match Score:** 209.19  
**Best Match Posterior Error Probability:** 1.10E-21  
**Best Match Spectrum:**

**Scan number** 15118      **Raw file** A549-US-WT-top20CID-Elite-2ug-B12  
**Method** ITMS; CID      **Genenames** HSPA6;HSPA7

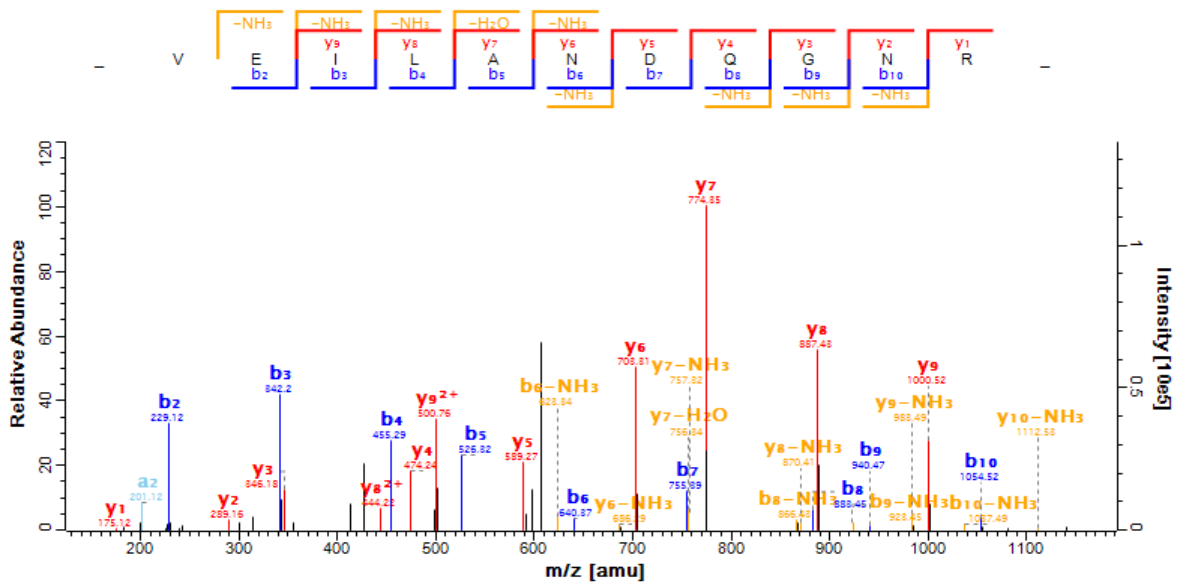

**Protein Group ID:** 2386  
**Protein Accession Numbers:** P17152  
**Gene Names:** TMEM11  
**Peptide Sequence:** LPLHTLTSSTPVVLVR  
**Total Number of Spectra:** 1  
**Number of Replicates (out of 8):** 1  
**Best Match Score:** 88.768  
**Best Match Posterior Error Probability:** 0.00063028  
**Best Match Spectrum:**

**Scan number** 53133      **Raw file** A549-US-Mock-top20CID-Elite-2ug-B12  
**Method** ITMS; CID      **Genenames** TMEM11

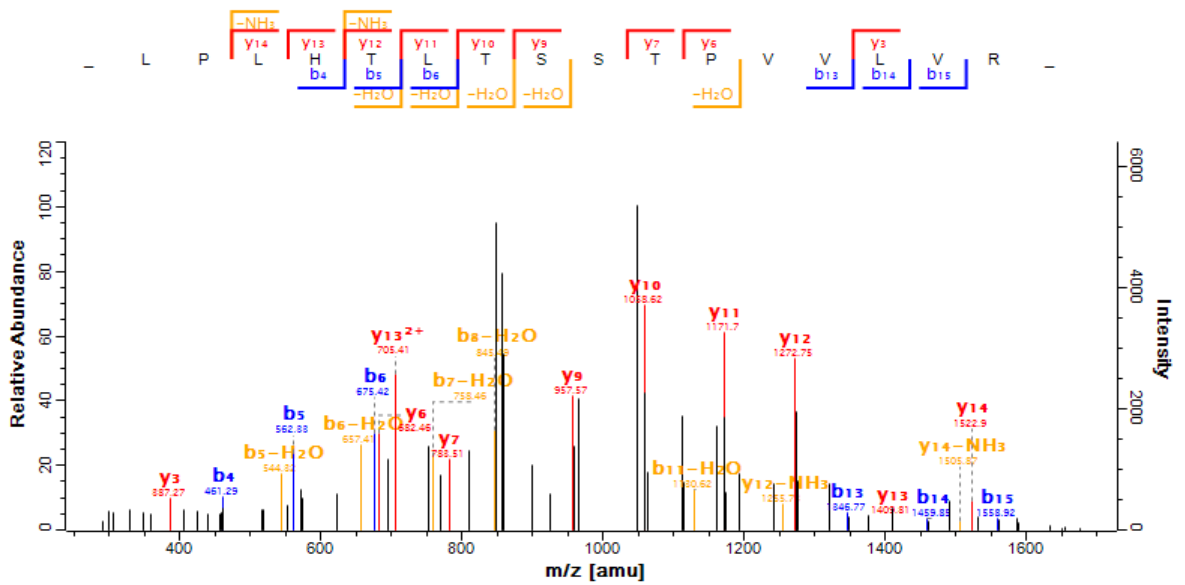

**Protein Group ID:** 2397  
**Protein Accession Numbers:** P17661  
**Gene Names:** DES  
**Peptide Sequence:** IESLN<sup>EEIA</sup>FLK  
**Total Number of Spectra:** 1  
**Number of Replicates (out of 8):** 1  
**Best Match Score:** 127.17  
**Best Match Posterior Error Probability:** 0.00010154  
**Best Match Spectrum:**

**Scan number** 62777      **Raw file** A549-US-Mock-top20CID-Elite-2ug-B11  
**Method** ITMS; CID      **Genenames** DES

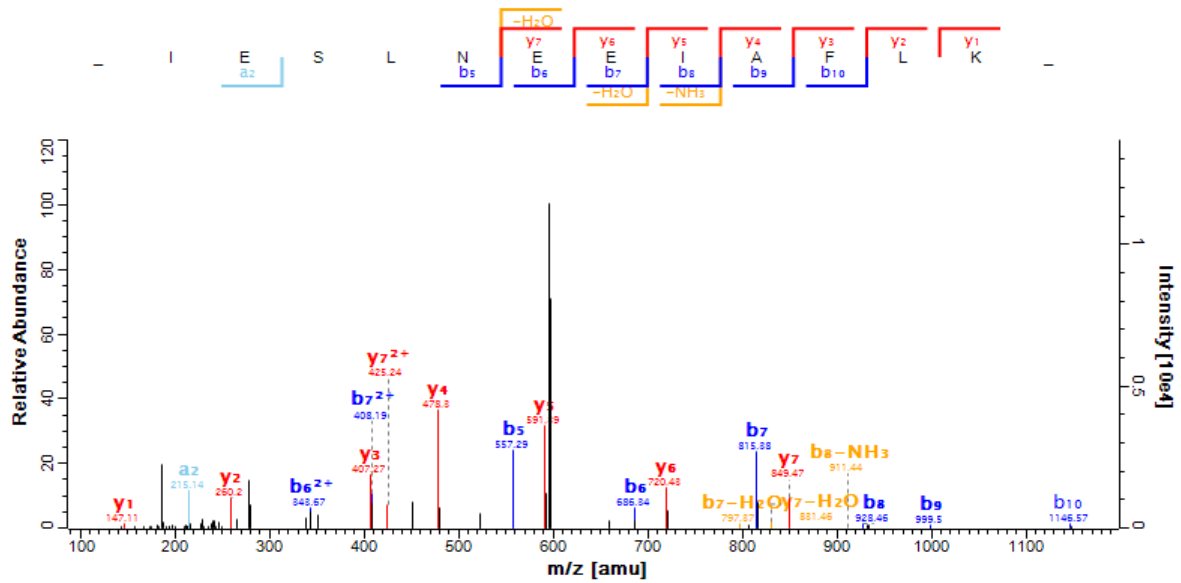

**Protein Group ID:** 2398  
**Protein Accession Numbers:** P17676  
**Gene Names:** CEBPB  
**Peptide Sequence:** VLELTAENER  
**Total Number of Spectra:** 9  
**Number of Replicates (out of 8):** 8  
**Best Match Score:** 136.02  
**Best Match Posterior Error Probability:** 8.91E-06  
**Best Match Spectrum:**

**Scan number** 23914      **Raw file** A549-US-WT-top20CID-Elite-2ug-811  
**Method** ITMS; CID      **Genenames** CEBPB

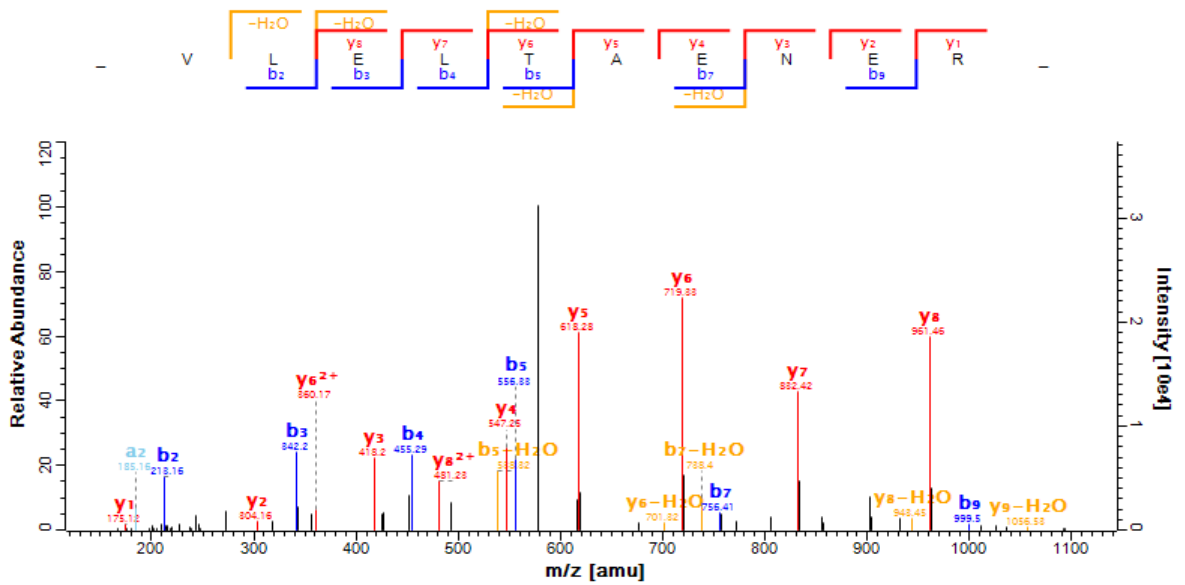

**Protein Group ID:** 2432  
**Protein Accession Numbers:** P20248  
**Gene Names:** CCNA2  
**Peptide Sequence:** EAGSALLQQTALQEDQENINPEK  
**Total Number of Spectra:** 1  
**Number of Replicates (out of 8):** 1  
**Best Match Score:** 61.524  
**Best Match Posterior Error Probability:** 0.0013223  
**Best Match Spectrum:**

**Scan number** 64188      **Raw file** A549-US-Mock-top20CID-Elite-2ug-B14  
**Method** ITMS; CID      **Genenames** CCNA2

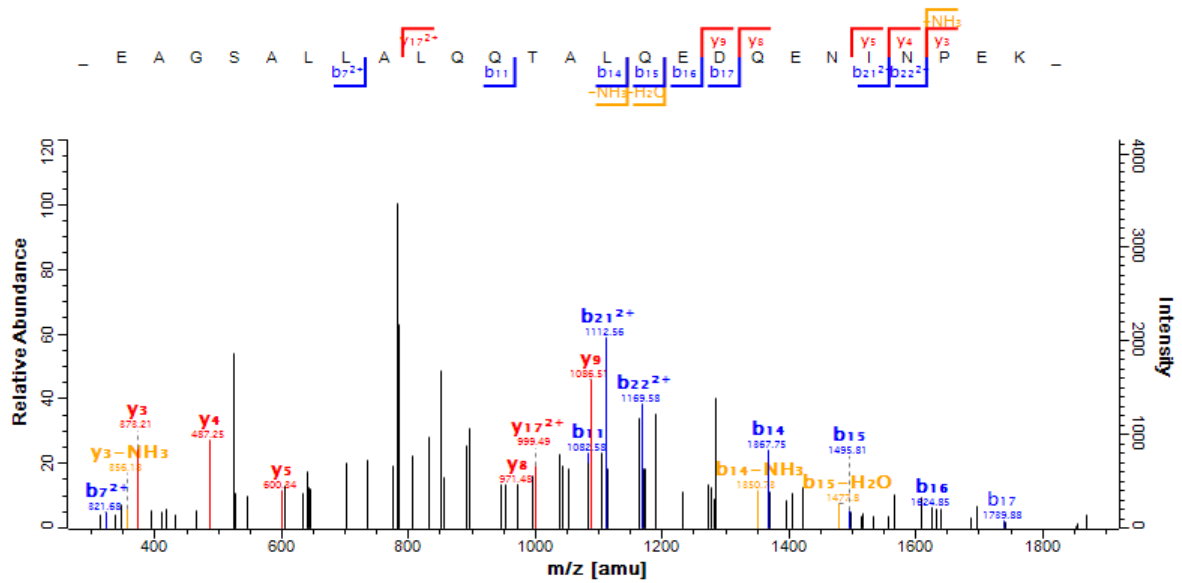





**Protein Group ID:** 2437  
**Protein Accession Numbers:** P20338  
**Gene Names:** RAB4A  
**Peptide Sequence:** MGSGIQYGDAALR  
**Total Number of Spectra:** 1  
**Number of Replicates (out of 8):** 1  
**Best Match Score:** 118.51  
**Best Match Posterior Error Probability:** 0.00016997  
**Best Match Spectrum:**

**Scan number** 32024      **Raw file** A549-US-WT-top20CID-Elite-2ug-B13  
**Method** ITMS; CID      **Genenames** RAB4A

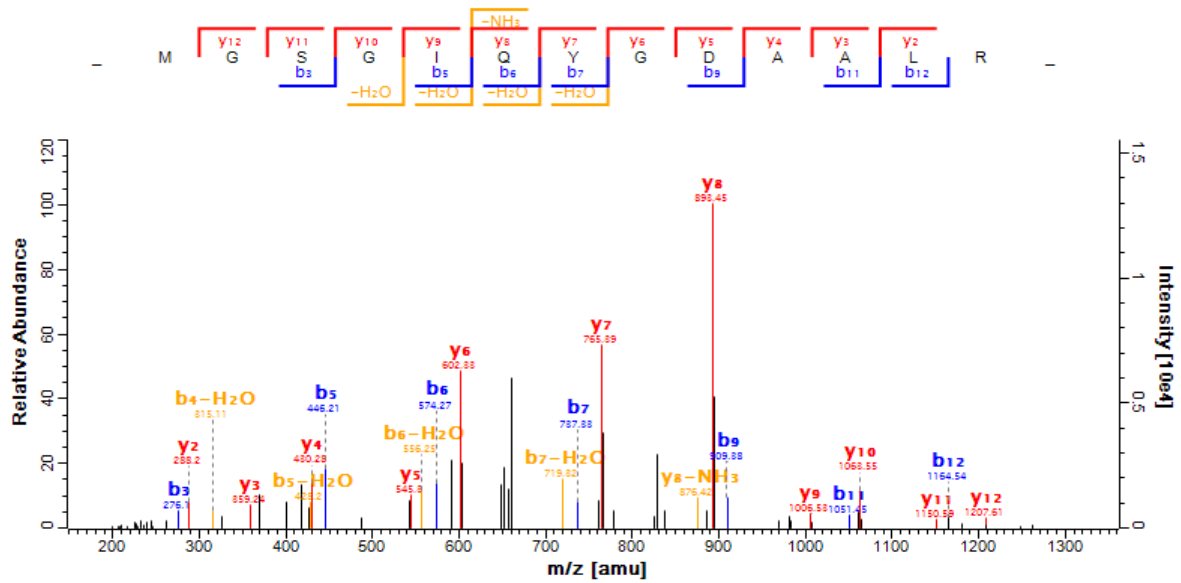

**Protein Group ID:** 2455  
**Protein Accession Numbers:** P21953  
**Gene Names:** BCKDHB  
**Peptide Sequence:** VCGYDTPFPFHIFEPFYIPDK  
**Total Number of Spectra:** 7  
**Number of Replicates (out of 8):** 7  
**Best Match Score:** 83.37  
**Best Match Posterior Error Probability:** 0.0003784  
**Best Match Spectrum:**

|                    |           |                  |                                   |
|--------------------|-----------|------------------|-----------------------------------|
| <b>Scan number</b> | 83127     | <b>Raw file</b>  | A549-US-WT-top20CID-Elite-2ug-B13 |
| <b>Method</b>      | ITMS; CID | <b>Genenames</b> | BCKDHB                            |

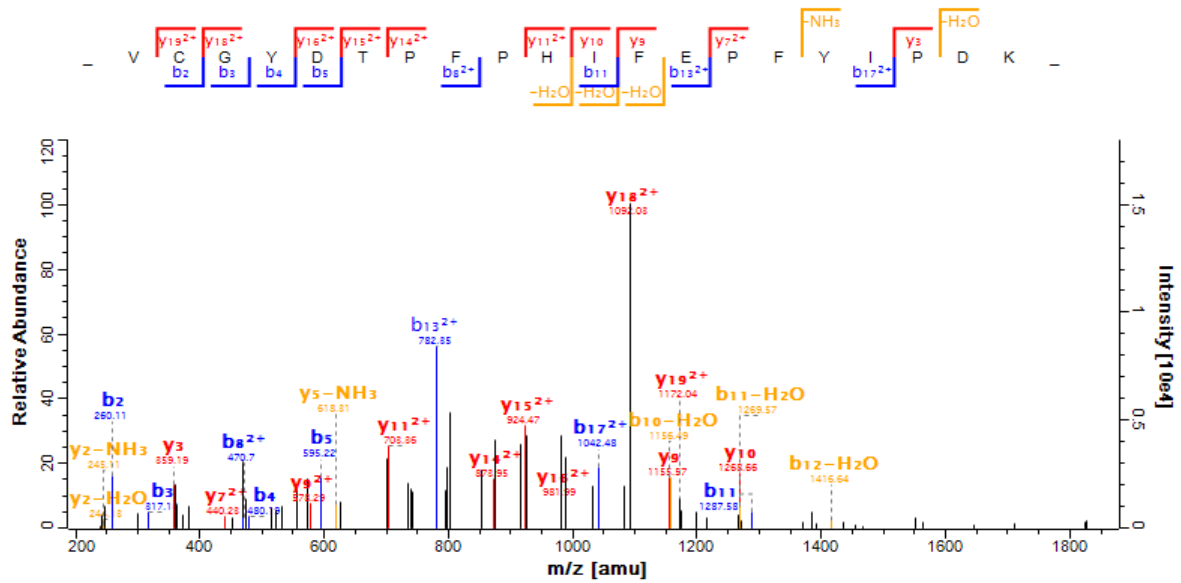

**Protein Group ID:** 2463  
**Protein Accession Numbers:** P22309; A6NJC3  
**Gene Names:** UGT1A1  
**Peptide Sequence:** ESFVSLGHN**Y**<sub>10</sub>V**Y**<sub>9</sub>F**Y**<sub>8</sub>E**Y**<sub>7</sub>N**D**<sub>13</sub><sup>2+</sup>**D**<sub>14</sub><sup>2+</sup>**Y**<sub>5</sub>S**Y**<sub>4</sub>F**Y**<sub>3</sub>L**Y**<sub>2</sub>Q**D**<sub>16</sub><sup>2+</sup>R

**Scan number** 67878      **Raw file** A549-US-WT-top20CID-Elite-2ug-B13  
**Method** ITMS; CID      **Genenames** UGT1A1

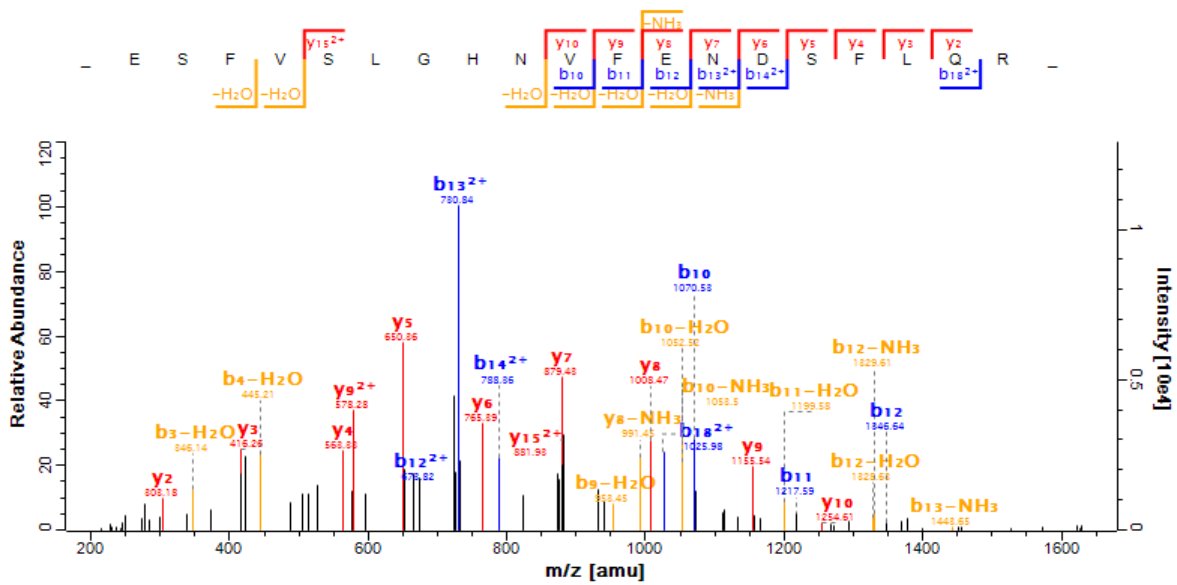

**Protein Group ID:** 2466  
**Protein Accession Numbers:** P22612  
**Gene Names:** PRKACG  
**Peptide Sequence:** DLKPENLLIDQQGYLQVTDFGFAK  
**Total Number of Spectra:** 6  
**Number of Replicates (out of 8):** 3  
**Best Match Score:** 82.593  
**Best Match Posterior Error Probability:** 0.00030165  
**Best Match Spectrum:**

**Scan number** 82235      **Raw file** A549-US-WT-top20CID-Elite-2ug-B11  
**Method** ITMS; CID      **Genenames** PRKACG

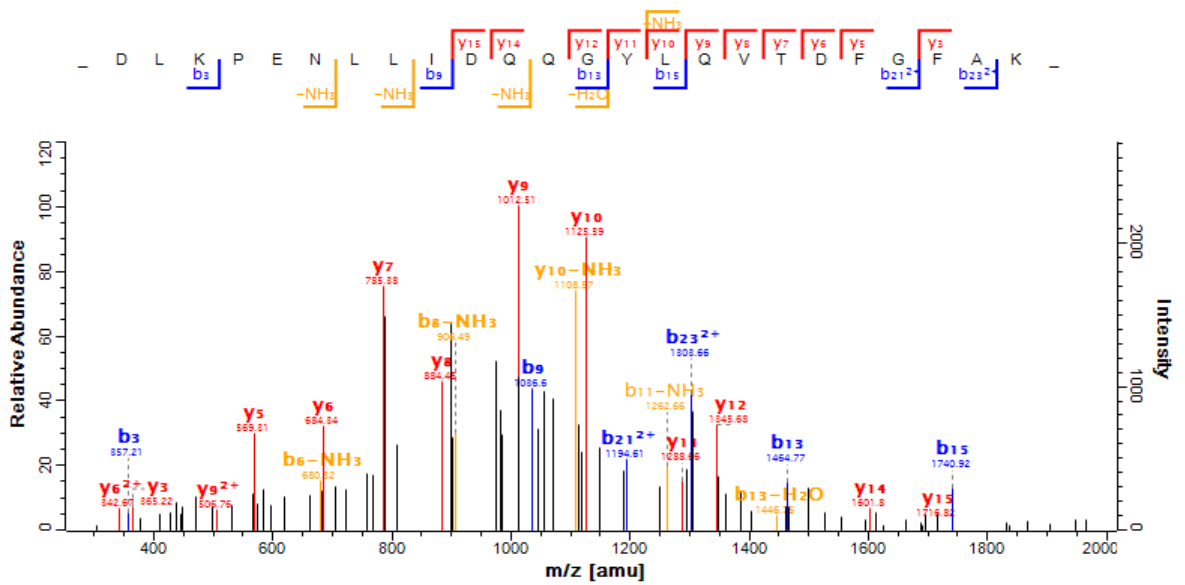



**Protein Group ID:** 2477

**Protein Accession Numbers:** P23378

**Gene Names:** GLDC

**Peptide Sequence:** DVSGVLFQYPDTEGKVELVER

**Total Number of Spectra:** 2

**Number of Replicates (out of 8):** 2

**Best Match Score:** 75.773

**Best Match Posterior Error Probability:** 0.0006188

**Best Match Spectrum:**

**Scan number** 78968      **Raw file** A549-US-Mock-top20CID-Elite-2ug-B13  
**Method** ITMS; CID      **Genenames** GLDC

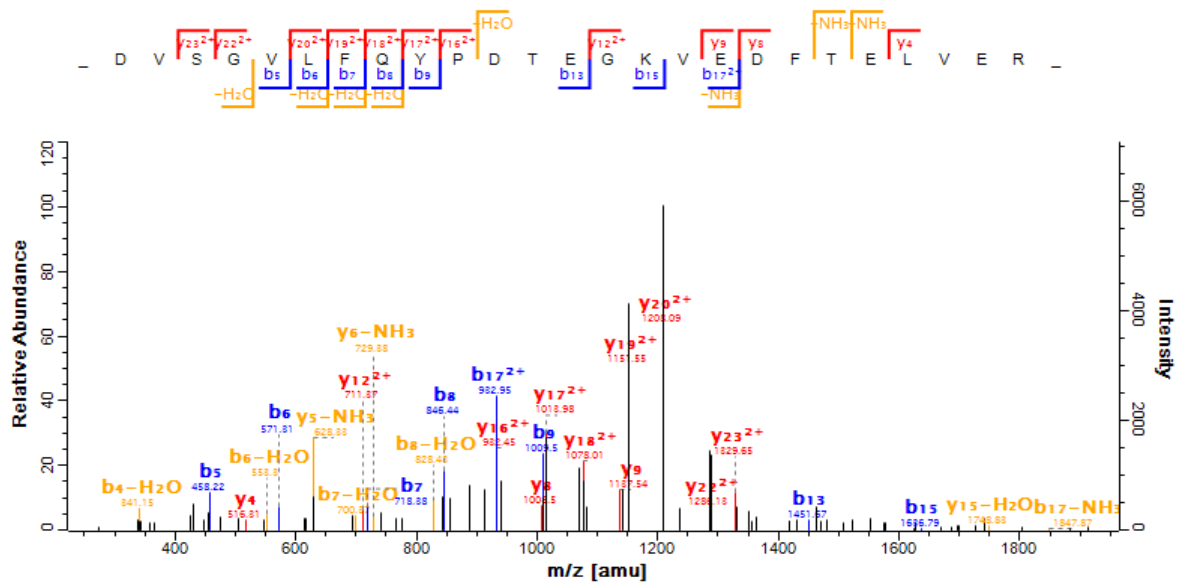

**Protein Group ID:** 2494  
**Protein Accession Numbers:** P24844; P24844-2  
**Gene Names:** MYL9  
**Peptide Sequence:** ELLTTMGDRFTDEEVDEMYR  
**Total Number of Spectra:** 1  
**Number of Replicates (out of 8):** 1  
**Best Match Score:** 69.935  
**Best Match Posterior Error Probability:** 0.0088815  
**Best Match Spectrum:**

**Scan number** 60562      **Raw file** A549-US-Mock-top20CID-Elite-2ug-B11  
**Method** ITMS; CID      **Genenames** MYL9

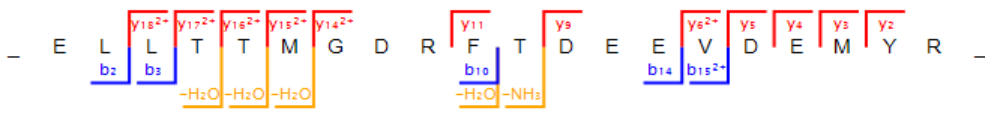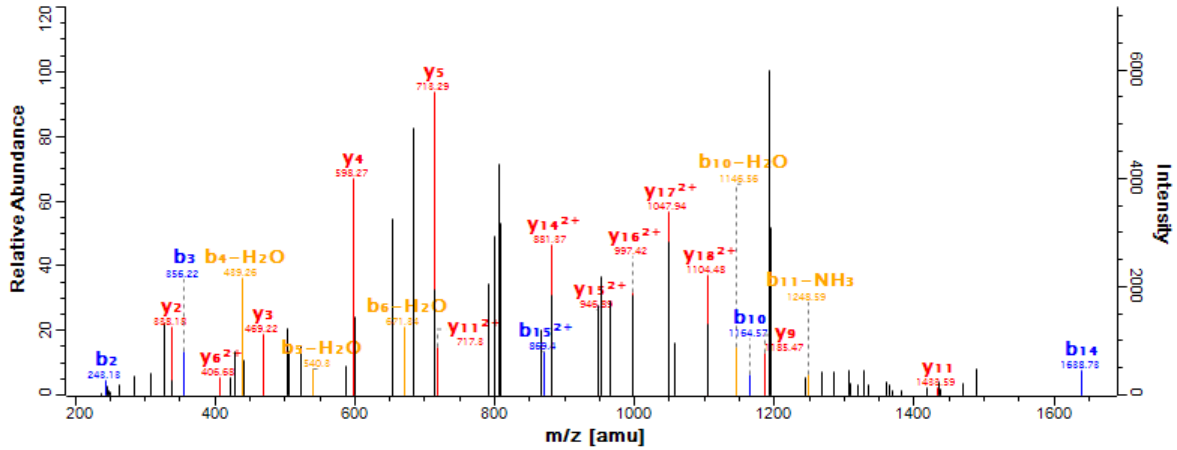



**Protein Group ID:** 2497  
**Protein Accession Numbers:** P25106  
**Gene Names:** CXCR7  
**Peptide Sequence:** VSETEYSALEQSTK  
**Total Number of Spectra:** 4  
**Number of Replicates (out of 8):** 4  
**Best Match Score:** 192.39  
**Best Match Posterior Error Probability:** 1.12E-24  
**Best Match Spectrum:**

**Scan number** 26019      **Raw file** A549-US-Mock-top20CID-Elite-2ug-B11  
**Method** ITMS; CID      **Genenames** CXCR7

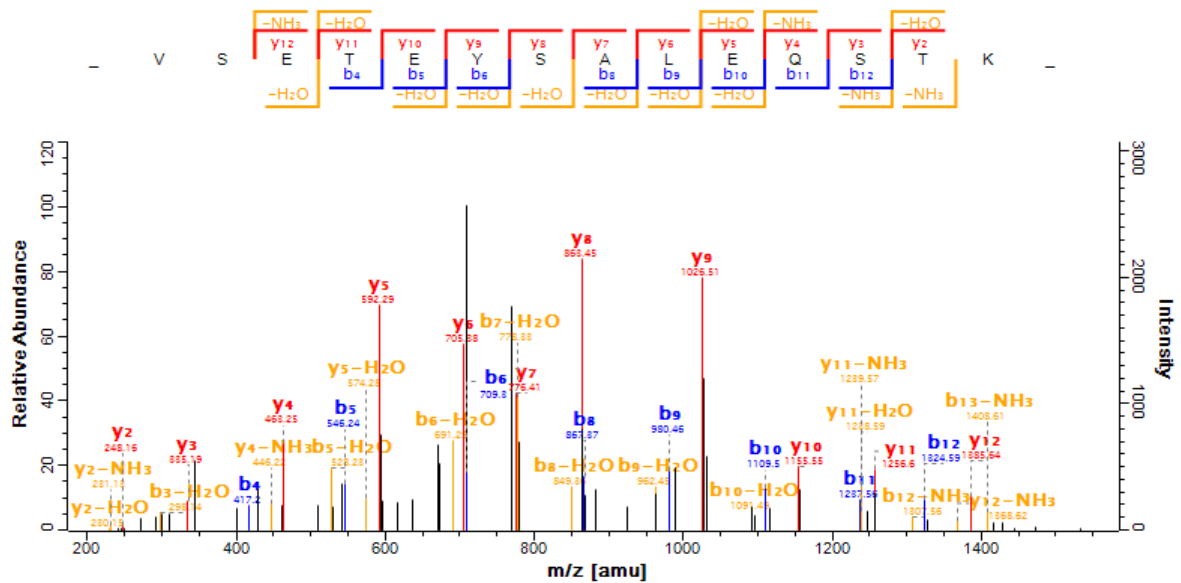

**Protein Group ID:** 2531  
**Protein Accession Numbers:** P27987; P27987-2  
**Gene Names:** ITPKB  
**Peptide Sequence:** AVYCYALNSLVIMNSANEMK  
**Total Number of Spectra:** 1  
**Number of Replicates (out of 8):** 1  
**Best Match Score:** 32.366  
**Best Match Posterior Error Probability:** 0.026495  
**Best Match Spectrum:**

**Scan number** 14714      **Raw file** A549-US-WT-top20CID-Elite-2ug-B14  
**Method** ITMS; CID      **Genenames** ITPKB

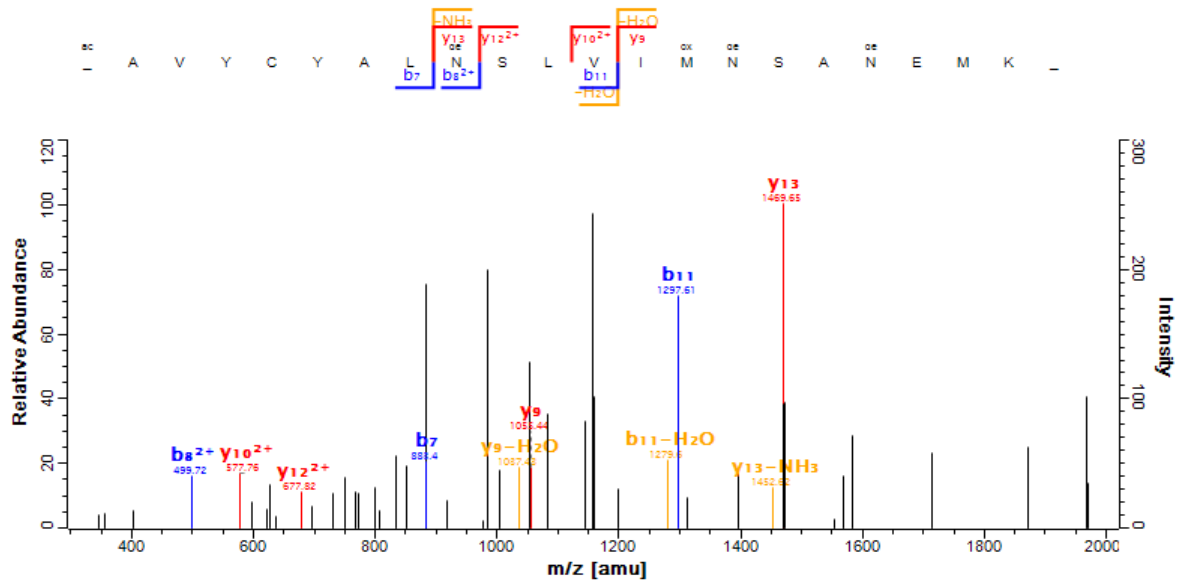



**Protein Group ID:** 2572  
**Protein Accession Numbers:** P30411; P30411-2  
**Gene Names:** BDKRB2  
**Peptide Sequence:** SEPIQMENSMGTLR  
**Total Number of Spectra:** 2  
**Number of Replicates (out of 8):** 2  
**Best Match Score:** 91.307  
**Best Match Posterior Error Probability:** 0.001073  
**Best Match Spectrum:**

**Scan number** 39749      **Raw file** A549-US-WT-top20CID-Elite-2ug-B12  
**Method** ITMS; CID      **Genenames** BDKRB2

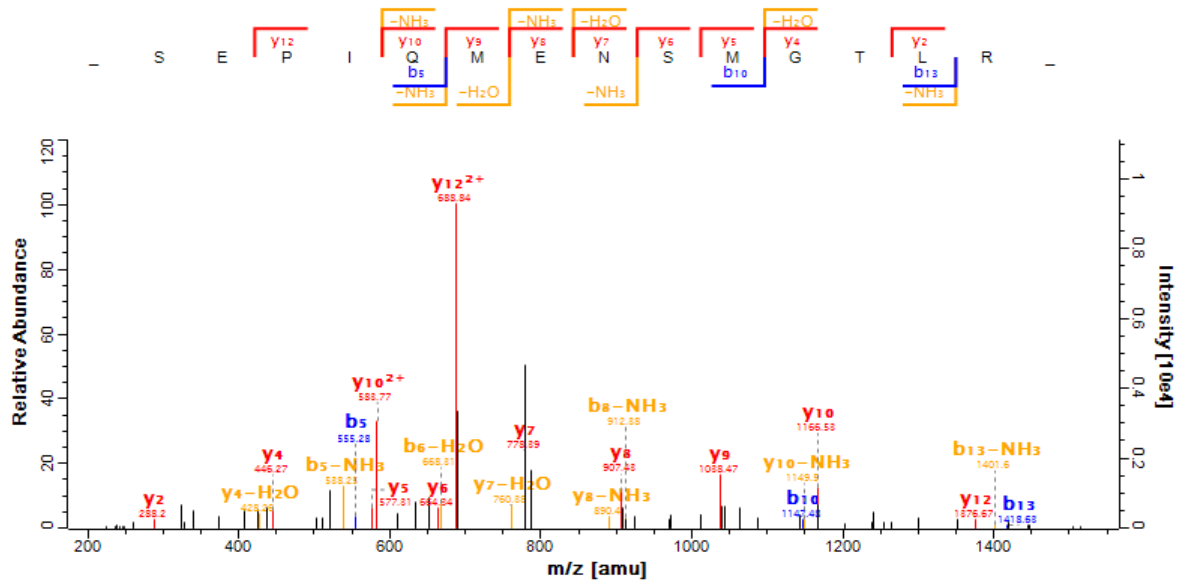

**Protein Group ID:** 2595  
**Protein Accession Numbers:** P31944  
**Gene Names:** CASP14  
**Peptide Sequence:** RDPTAEQFQEELK  
**Total Number of Spectra:** 1  
**Number of Replicates (out of 8):** 1  
**Best Match Score:** 129.77  
**Best Match Posterior Error Probability:** 9.27E-05  
**Best Match Spectrum:**

**Scan number** 34296      **Raw file** A549-US-WT-top20CID-Elite-2ug-B14  
**Method** ITMS; CID      **Genenames** CASP14

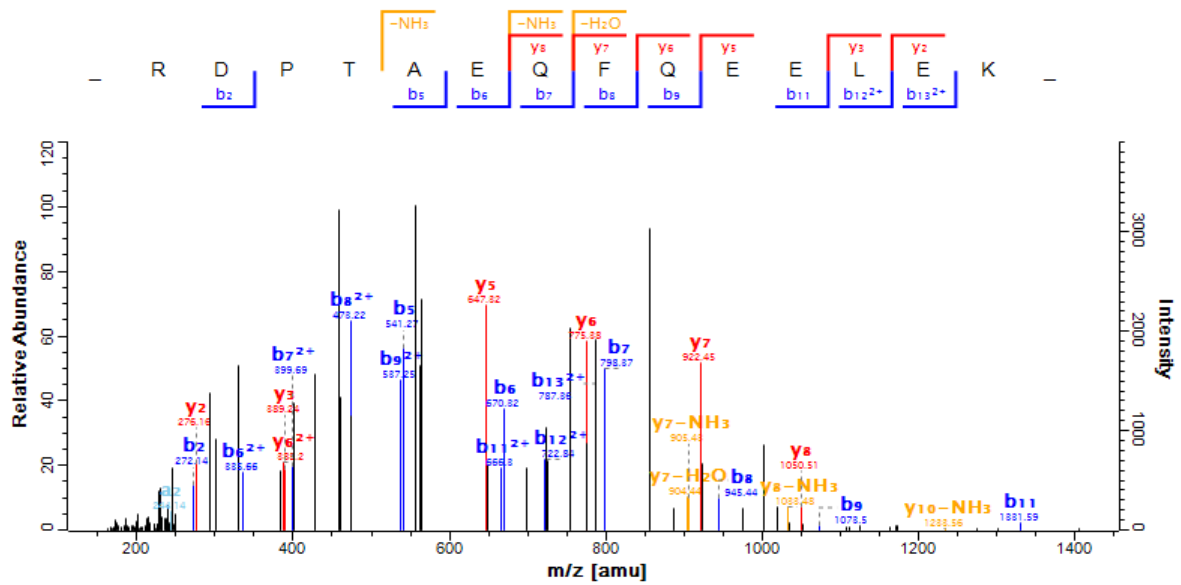

**Protein Group ID:** 2600  
**Protein Accession Numbers:** P32320  
**Gene Names:** CDA  
**Peptide Sequence:** GCNIENACYPLGICAER  
**Total Number of Spectra:** 6  
**Number of Replicates (out of 8):** 4  
**Best Match Score:** 161.99  
**Best Match Posterior Error Probability:** 1.66E-09  
**Best Match Spectrum:**

**Scan number** 46025      **Raw file** A549-US-WT-top20CID-Elite-2ug-B11  
**Method** ITMS; CID      **Genenames** CDA

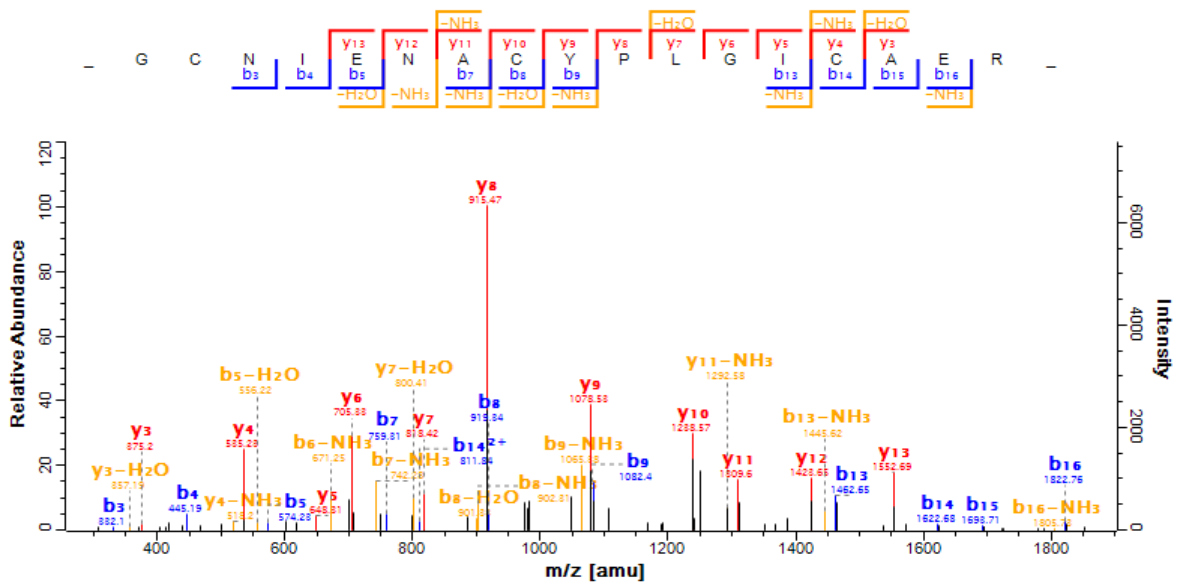



**Protein Group ID:** 2641

**Protein Accession Numbers:** P35869

**Gene Names:** AHR

**Peptide Sequence:** LPFMFTTGEAVLYEATNPFPAIMDPLPLR

**Total Number of Spectra:** 1

**Number of Replicates (out of 8):** 1

**Best Match Score:** 65.387

**Best Match Posterior Error Probability:** 0.012243

**Best Match Spectrum:**

**Scan number** 96263      **Raw file** A549-US-WT-top20CID-Elite-2ug-B13  
**Method** ITMS; CID      **Genenames** AHR

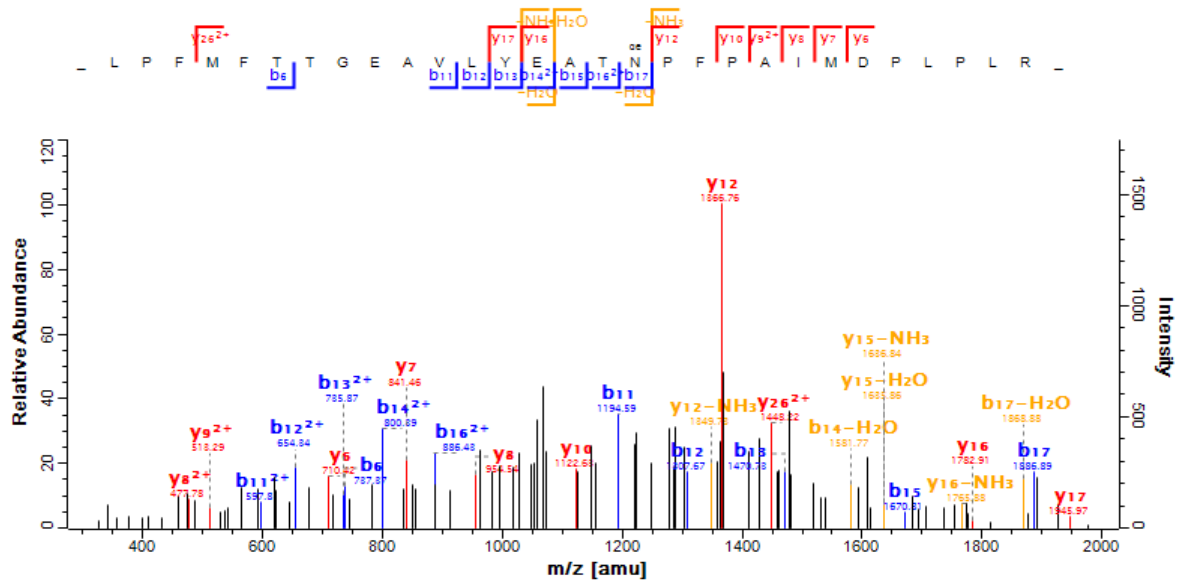



**Protein Group ID:** 2642

**Protein Accession Numbers:** P35908

**Gene Names:** KRT2

**Peptide Sequence:** GGGFGGSSFGGGSGFSGGGFGGGGFGGGR

**Total Number of Spectra:** 16

**Number of Replicates (out of 8):** 7

**Best Match Score:** 226.72

**Best Match Posterior Error Probability:** 2.19E-111

**Best Match Spectrum:**

|                    |           |                  |                                     |
|--------------------|-----------|------------------|-------------------------------------|
| <b>Scan number</b> | 56027     | <b>Raw file</b>  | A549-US-Mock-top20CID-Elite-2ug-B12 |
| <b>Method</b>      | ITMS; CID | <b>Genenames</b> | KRT2                                |

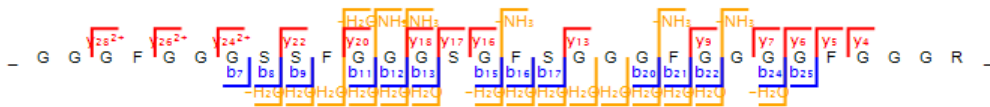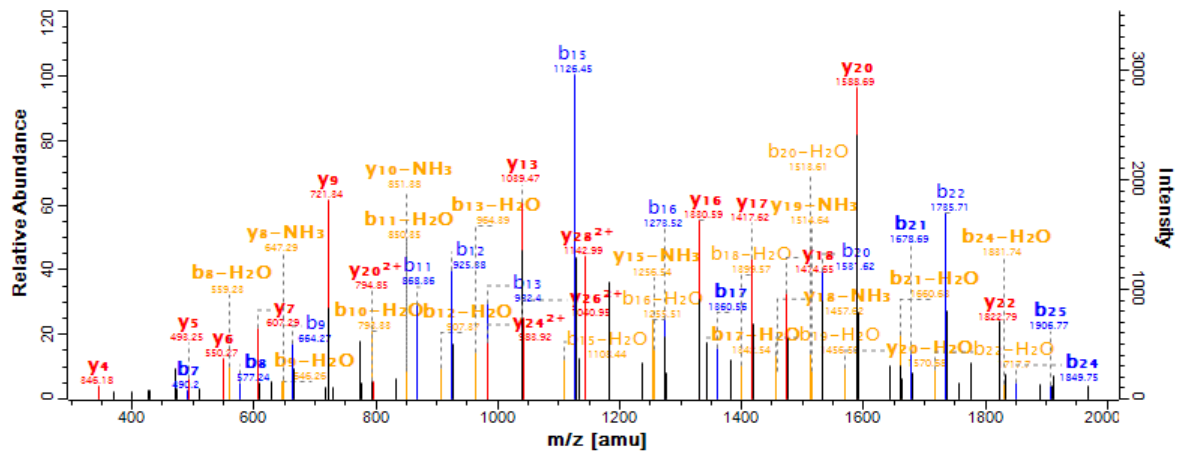

**Protein Group ID:** 2646

**Protein Accession Numbers:** P36406; P36406-2; P36406-3

**Gene Names:** TRIM23

**Peptide Sequence:** DALLLIFANK

**Total Number of Spectra:** 7

**Number of Replicates (out of 8):** 7

**Best Match Score:** 192.32

**Best Match Posterior Error Probability:** 8.24E-13

**Best Match Spectrum:**

**Scan number** 65447      **Raw file** A549-US-Mock-top20CID-Elite-2ug-B12  
**Method** ITMS; CID      **Genenames** TRIM23

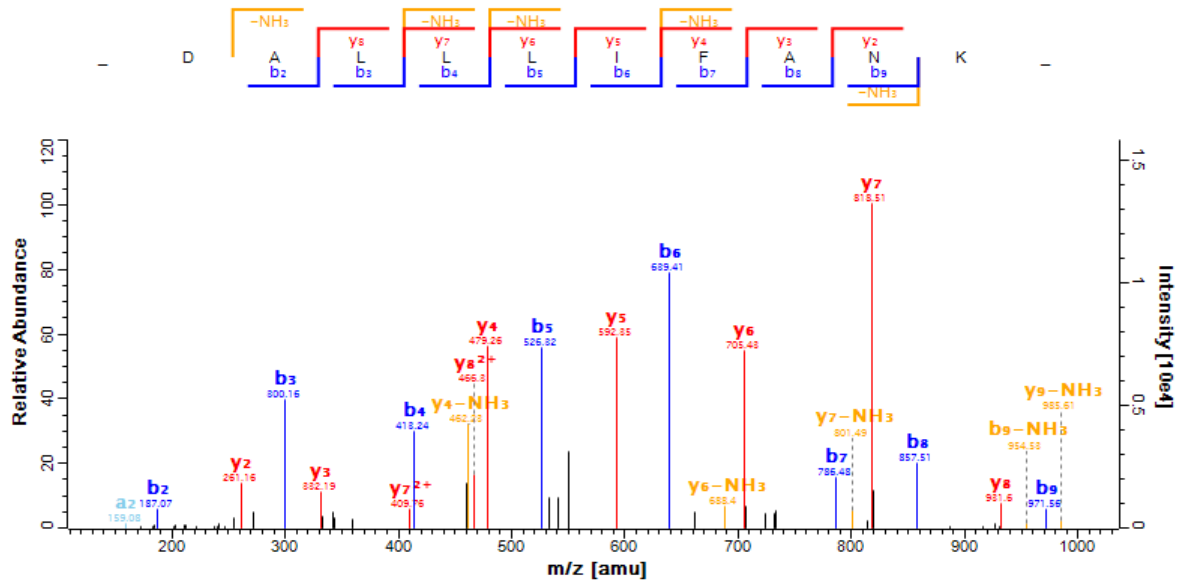

**Protein Group ID:** 2652

**Protein Accession Numbers:** P36639; P36639-2; P36639-3; P36639-4

**Gene Names:** NUDT1

**Peptide Sequence:** DMWPDDSYWFPDLLQK

**Total Number of Spectra:** 10

**Number of Replicates (out of 8):** 8

**Best Match Score:** 193.16

**Best Match Posterior Error Probability:** 2.01E-28

**Best Match Spectrum:**

**Scan number** 93657      **Raw file** A549-US-WT-top20CID-Elite-2ug-B12  
**Method** ITMS; CID      **Genenames** NUDT1

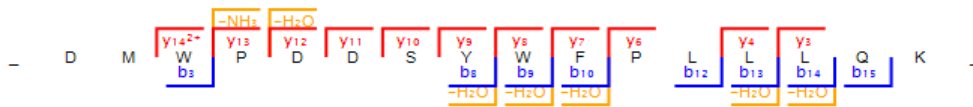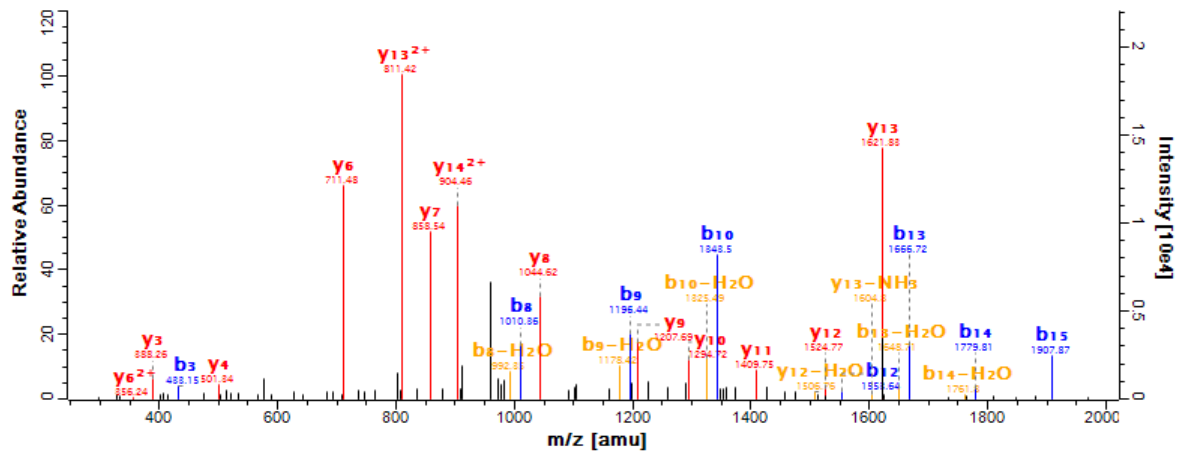

**Protein Group ID:** 2686  
**Protein Accession Numbers:** P41134; P41134-2  
**Gene Names:** ID1  
**Peptide Sequence:** VASGSTATAAAGPSCALK  
**Total Number of Spectra:** 2  
**Number of Replicates (out of 8):** 2  
**Best Match Score:** 109.42  
**Best Match Posterior Error Probability:** 3.53E-05  
**Best Match Spectrum:**

**Scan number** 16816      **Raw file** A549-US-Mock-top20CID-Elite-2ug-B13  
**Method** ITMS; CID      **Genenames** ID1

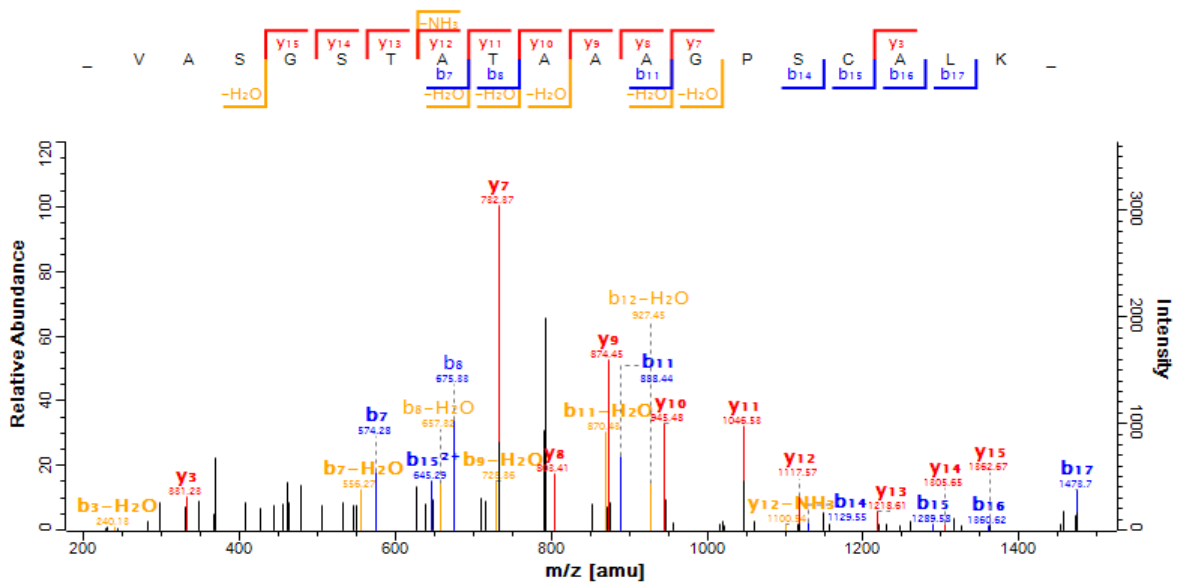

**Protein Group ID:** 2691  
**Protein Accession Numbers:** P41226  
**Gene Names:** UBA7  
**Peptide Sequence:** TVALSSAGVLSPLMVAAMLGAVAAQEVLK  
**Total Number of Spectra:** 2  
**Number of Replicates (out of 8):** 1  
**Best Match Score:** 84.127  
**Best Match Posterior Error Probability:** 4.00E-05  
**Best Match Spectrum:**

**Scan number** 96777      **Raw file** A549-US-WT-top20CID-Elite-2ug-B12  
**Method** ITMS; CID      **Genenames** UBA7

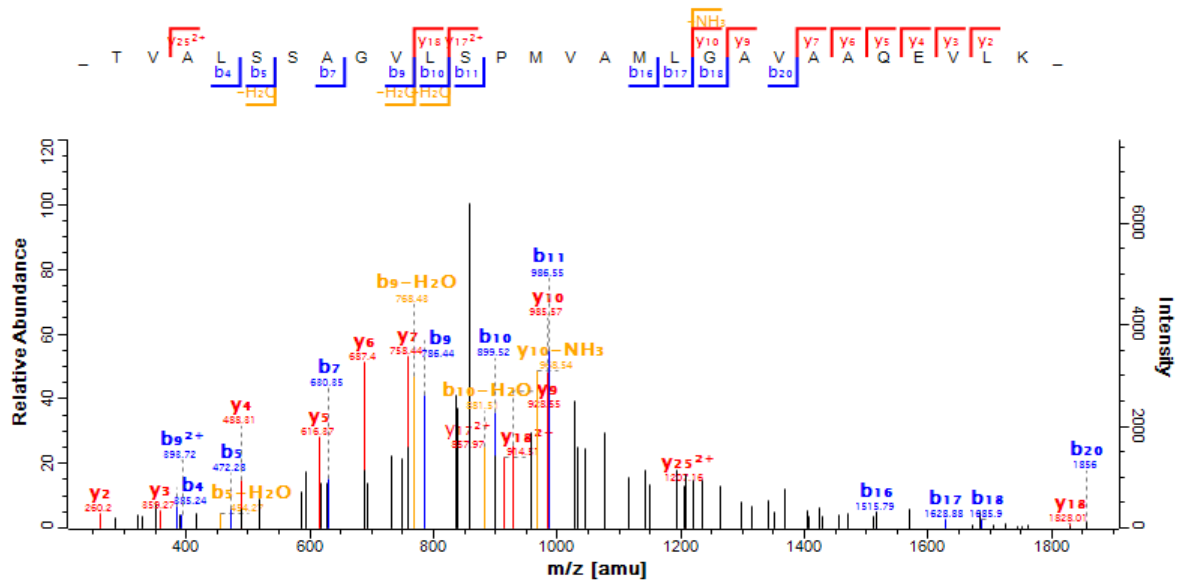

**Protein Group ID:** 2693

**Protein Accession Numbers:** P41235-4; P41235; P41235-2; P41235-5; P41235-6; P41235-3; P41235-7

**Gene Names:** HNF4A

**Peptide Sequence:** DVLLLGNDYIVPR

**Total Number of Spectra:** 1

**Number of Replicates (out of 8):** 1

**Best Match Score:** 112.43

**Best Match Posterior Error Probability:** 0.00027875

**Best Match Spectrum:**

**Scan number** 65947      **Raw file** A549-US-Mock-top20CID-Elite-2ug-B14  
**Method** ITMS: CID      **Genenames** HNF4A

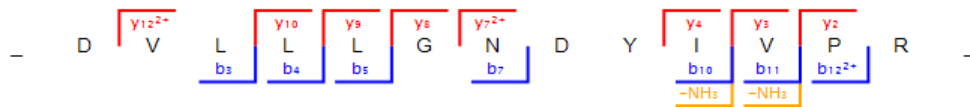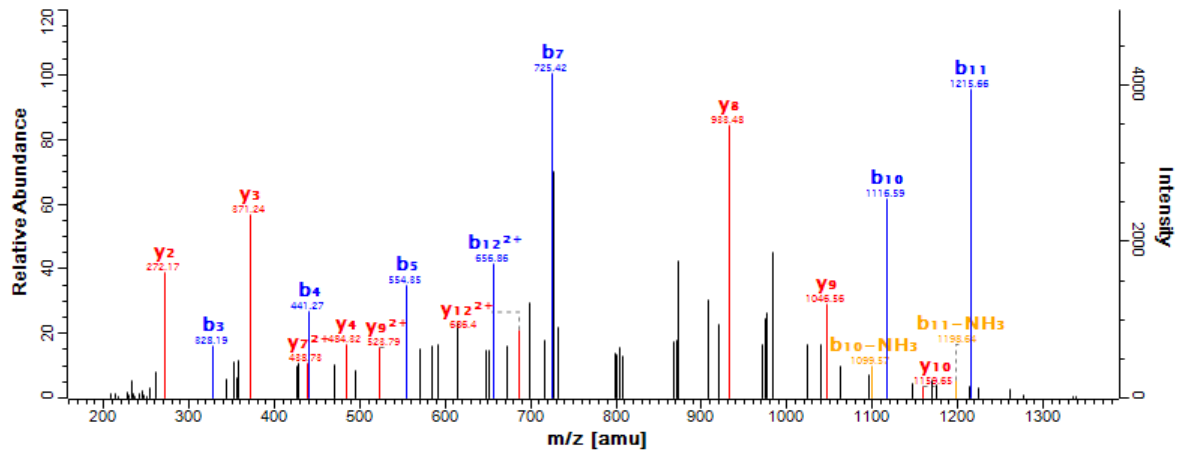

**Protein Group ID:** 2712  
**Protein Accession Numbers:** P42858  
**Gene Names:** HTT  
**Peptide Sequence:** AISEEEEEVDPNTQNP K  
**Total Number of Spectra:** 3  
**Number of Replicates (out of 8):** 3  
**Best Match Score:** 83.106  
**Best Match Posterior Error Probability:** 0.0011246  
**Best Match Spectrum:**

**Scan number** 19712      **Raw file** A549-US-Mock-top20CID-Elite-2ug-B13  
**Method** ITMS; CID      **Genenames** HTT

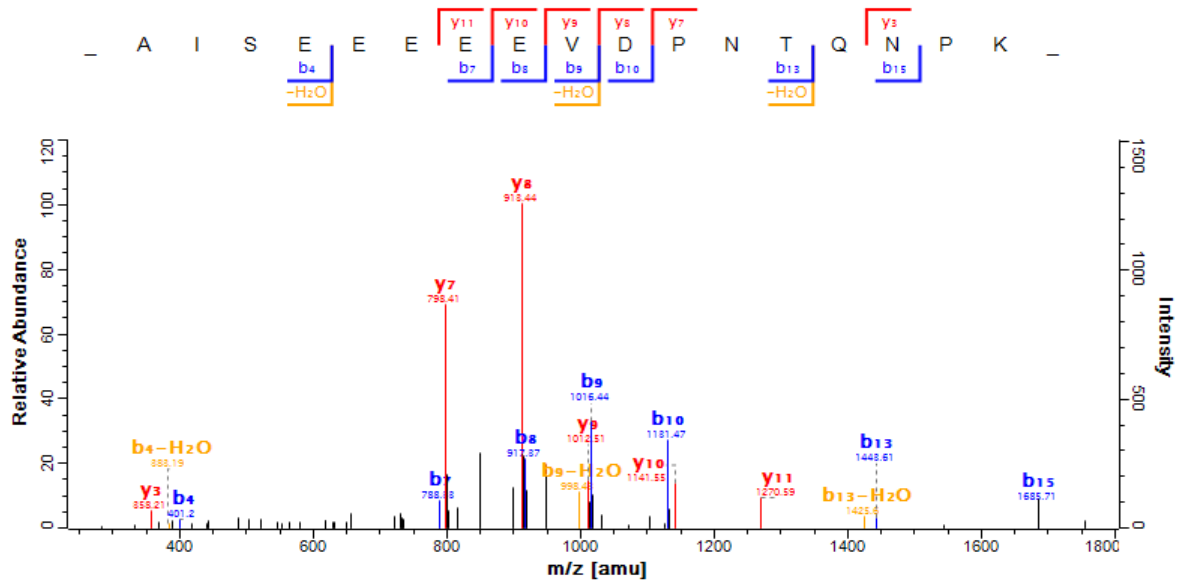

**Protein Group ID:** 2715  
**Protein Accession Numbers:** P43121; P43121-2  
**Gene Names:** MCAM  
**Peptide Sequence:** VWLEVEPVGM LK  
**Total Number of Spectra:** 2  
**Number of Replicates (out of 8):** 2  
**Best Match Score:** 77.597  
**Best Match Posterior Error Probability:** 0.0039159  
**Best Match Spectrum:**

|                    |           |                  |                                   |
|--------------------|-----------|------------------|-----------------------------------|
| <b>Scan number</b> | 68746     | <b>Raw file</b>  | A549-US-WT-top20CID-Elite-2ug-B13 |
| <b>Method</b>      | ITMS; CID | <b>Genenames</b> | MCAM                              |

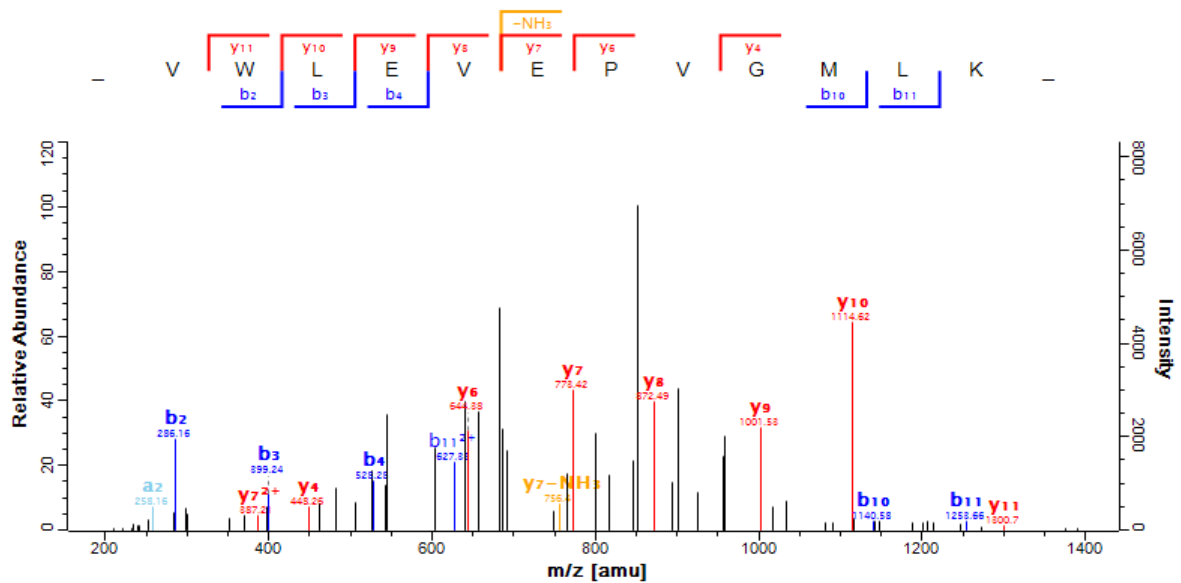



**Protein Group ID:** 2722  
**Protein Accession Numbers:** P43378  
**Gene Names:** PTPN9  
**Peptide Sequence:** NQQLAVSNMGAR  
**Total Number of Spectra:** 4  
**Number of Replicates (out of 8):** 4  
**Best Match Score:** 178.84  
**Best Match Posterior Error Probability:** 2.02E-14  
**Best Match Spectrum:**

**Scan number** 20145      **Raw file** A549-US-WT-top20CID-Elite-2ug-B13  
**Method** ITMS; CID      **Genenames** PTPN9

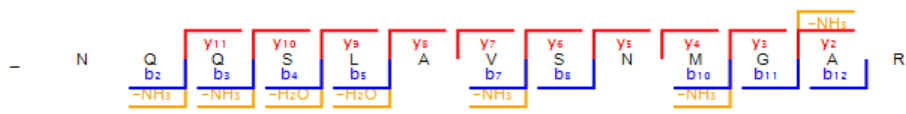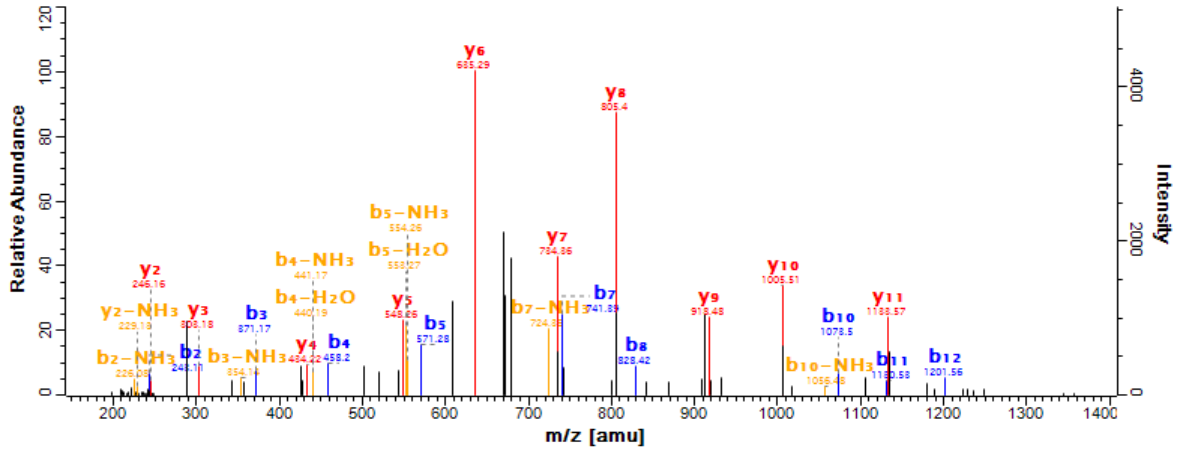

**Protein Group ID:** 2769  
**Protein Accession Numbers:** P48552  
**Gene Names:** NR1P1  
**Peptide Sequence:** SHRNNEMALLESK  
**Total Number of Spectra:** 2  
**Number of Replicates (out of 8):** 2  
**Best Match Score:** 98.337  
**Best Match Posterior Error Probability:** 0.0026583  
**Best Match Spectrum:**

**Scan number** 59686      **Raw file** A549-US-Mock-top20CID-Elite-2ug-B13  
**Method** ITMS; CID      **Genenames** NR1P1

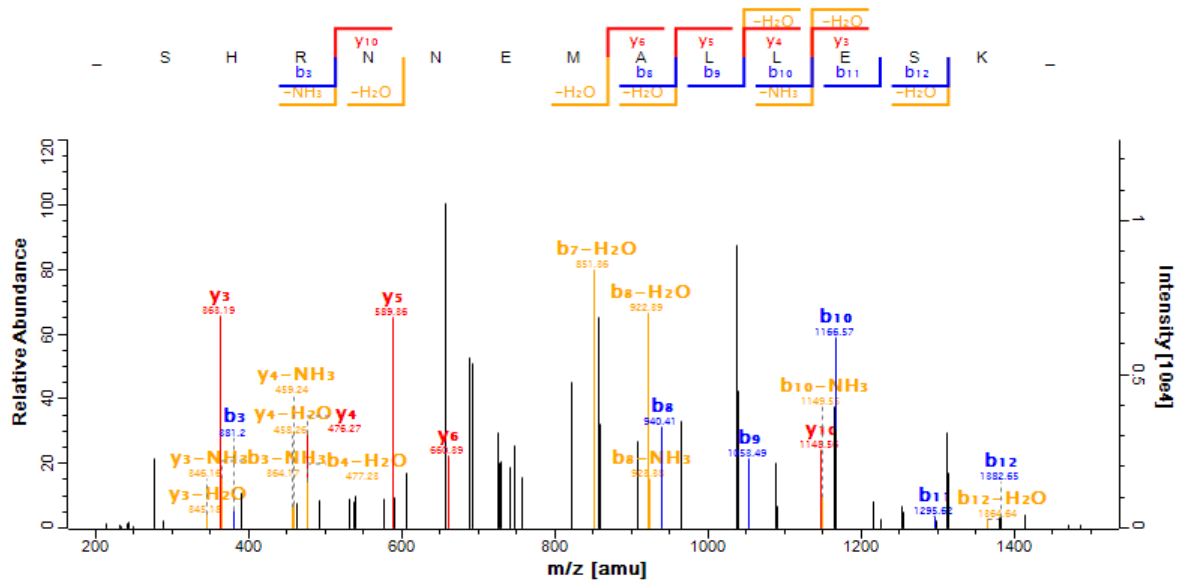

**Protein Group ID:** 2780  
**Protein Accession Numbers:** P49207  
**Gene Names:** RPL34  
**Peptide Sequence:** AFLIEEQK  
**Total Number of Spectra:** 6  
**Number of Replicates (out of 8):** 6  
**Best Match Score:** 182.68  
**Best Match Posterior Error Probability:** 1.10E-08  
**Best Match Spectrum:**

**Scan number** 29190      **Raw file** A549-US-Mock-top20CID-Elite-2ug-B14  
**Method** ITMS; CID      **Genenames** RPL34

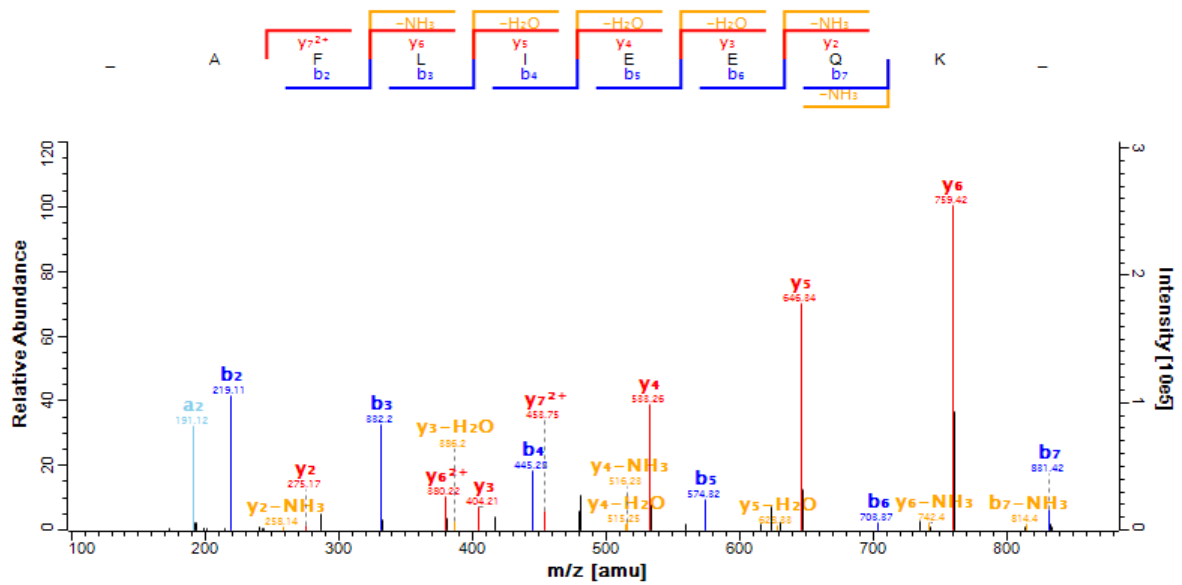

**Protein Group ID:** 2799  
**Protein Accession Numbers:** P49703  
**Gene Names:** ARL4D  
**Peptide Sequence:** QDQPGALSAAEVEK  
**Total Number of Spectra:** 1  
**Number of Replicates (out of 8):** 1  
**Best Match Score:** 80.905  
**Best Match Posterior Error Probability:** 0.0030248  
**Best Match Spectrum:**

**Scan number** 22516      **Raw file** A549-US-WT-top20CID-Elite-2ug-B14  
**Method** ITMS; CID      **Genenames** ARL4D

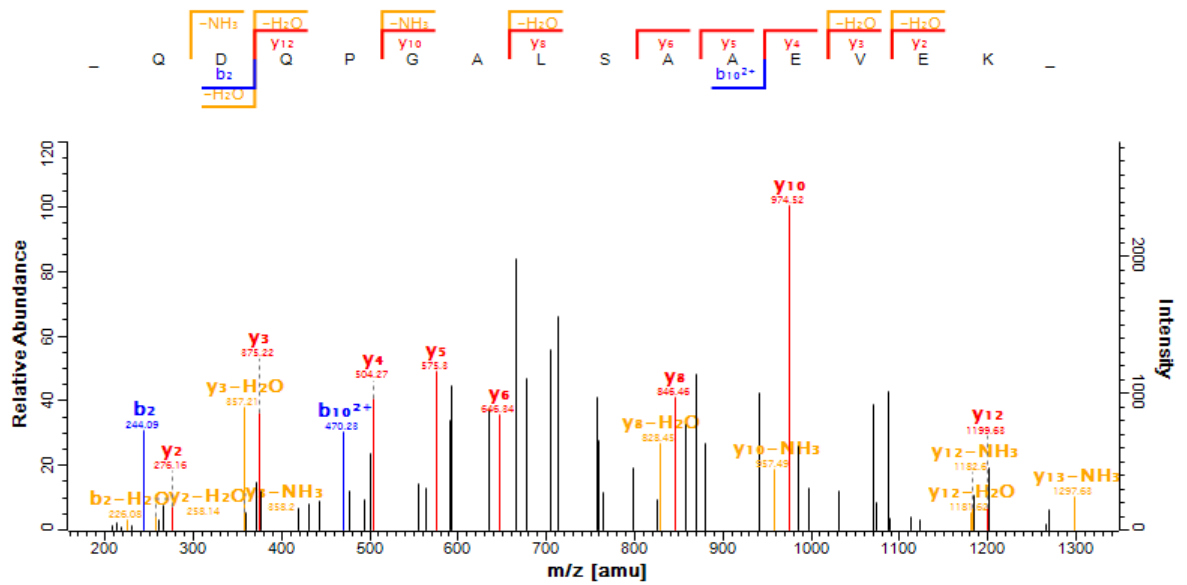

**Protein Group ID:** 2805

**Protein Accession Numbers:** P49753; P49753-2; B3KSA0

**Gene Names:** ACOT2

**Peptide Sequence:** TMETLHLEYFEEAMNYLLSHPEVK

**Total Number of Spectra:** 8

**Number of Replicates (out of 8):** 8

**Best Match Score:** 111.95

**Best Match Posterior Error Probability:** 5.42E-09

**Best Match Spectrum:**

**Scan number** 91959      **Raw file** A549-US-WT-top20CID-Elite-2ug-B12  
**Method** ITMS; CID      **Genenames** ACOT2

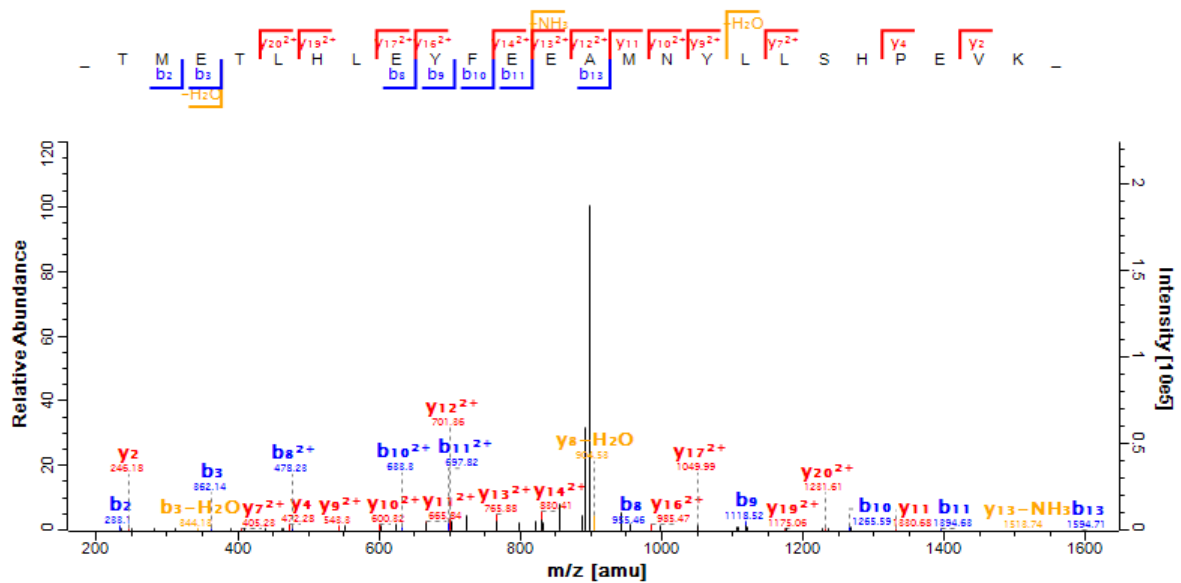

**Protein Group ID:** 2824  
**Protein Accession Numbers:** P50443  
**Gene Names:** SLC26A2  
**Peptide Sequence:** NMILGFLPVLQWLPLK  
**Total Number of Spectra:** 1  
**Number of Replicates (out of 8):** 1  
**Best Match Score:** 125.53  
**Best Match Posterior Error Probability:** 3.57E-05  
**Best Match Spectrum:**

**Scan number** 97178      **Raw file** A549-US-WT-top20CID-Elite-2ug-B11  
**Method** ITMS; CID      **Genenames** SLC26A2

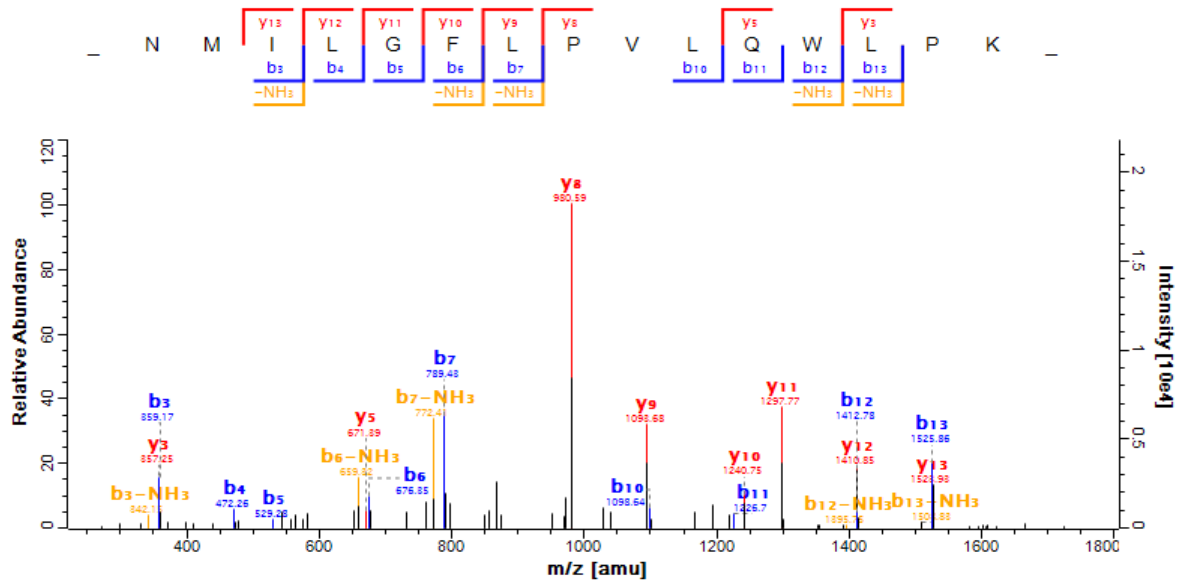

**Protein Group ID:** 2843  
**Protein Accession Numbers:** P51151  
**Gene Names:** RAB9A  
**Peptide Sequence:** QVSTEEAQWCR  
**Total Number of Spectra:** 2  
**Number of Replicates (out of 8):** 2  
**Best Match Score:** 86.911  
**Best Match Posterior Error Probability:** 0.0017887  
**Best Match Spectrum:**

**Scan number** 24038      **Raw file** A549-US-WT-top20CID-Elite-2ug-B12  
**Method** ITMS; CID      **Genenames** RAB9A

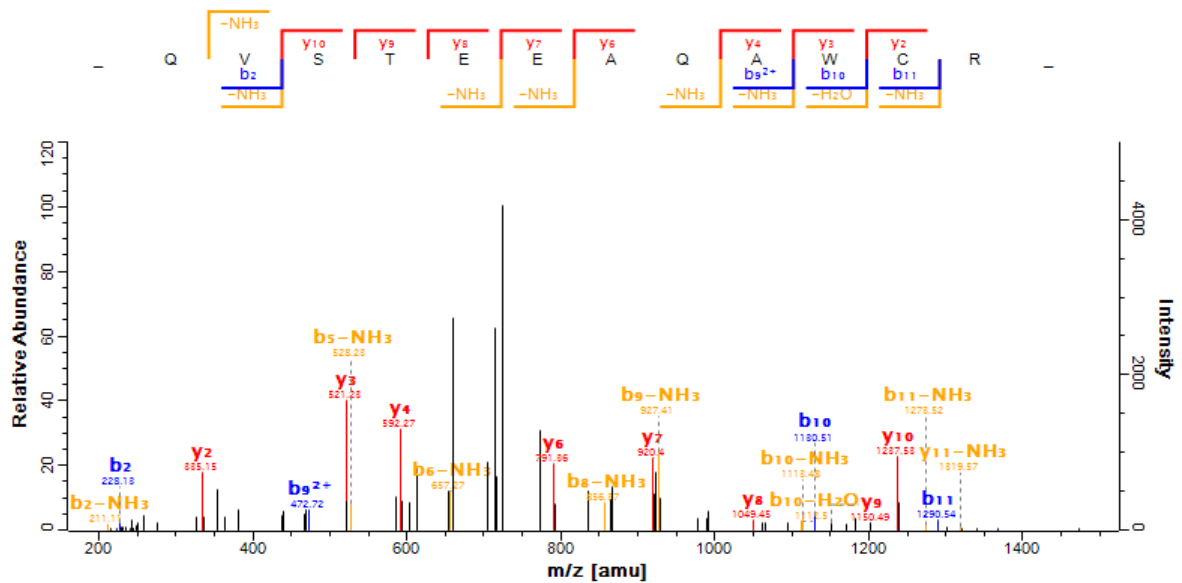

**Protein Group ID:** 2845  
**Protein Accession Numbers:** P51397  
**Gene Names:** DAP  
**Peptide Sequence:** DKDDQEWESPPPKPTVFISGVIA R  
**Total Number of Spectra:** 1  
**Number of Replicates (out of 8):** 1  
**Best Match Score:** 78.324  
**Best Match Posterior Error Probability:** 0.0024478  
**Best Match Spectrum:**

**Scan number** 62887      **Raw file** A549-US-WT-top20CID-Elite-2ug-B13  
**Method** ITMS; CID      **Genenames** DAP

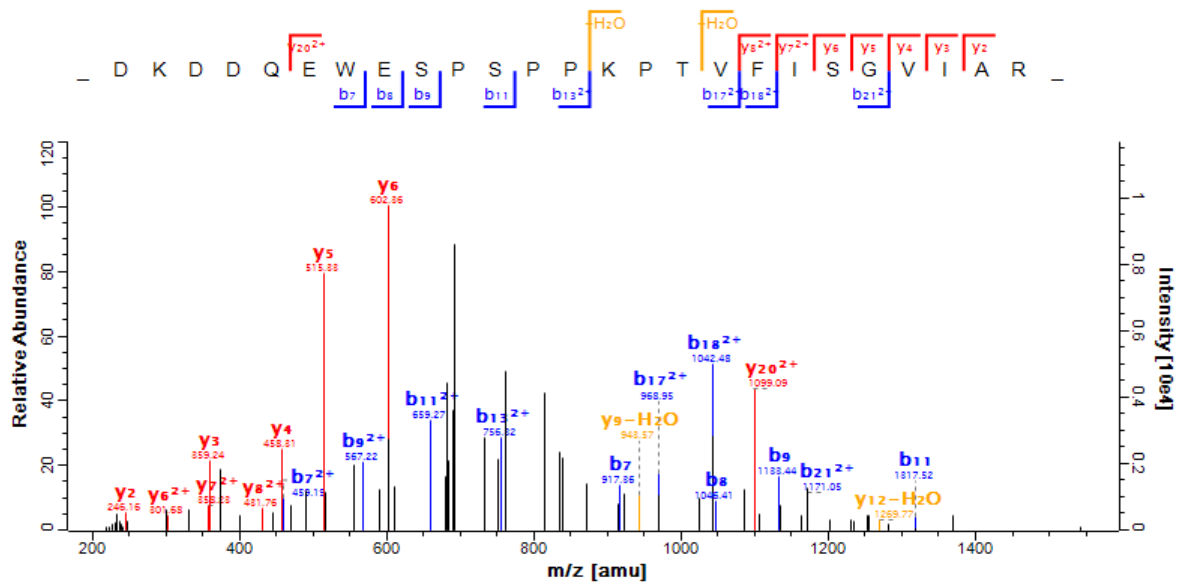



**Protein Group ID:** 2853  
**Protein Accession Numbers:** P51608-2; P51608  
**Gene Names:** MECP2  
**Peptide Sequence:** AEGGGATTSTQVMVIK  
**Total Number of Spectra:** 1  
**Number of Replicates (out of 8):** 1  
**Best Match Score:** 160.8  
**Best Match Posterior Error Probability:** 1.63E-09  
**Best Match Spectrum:**

**Scan number** 27992      **Raw file** A549-US-Mock-top20CID-Elite-2ug-B14  
**Method** ITMS; CID      **Genenames** MECP2

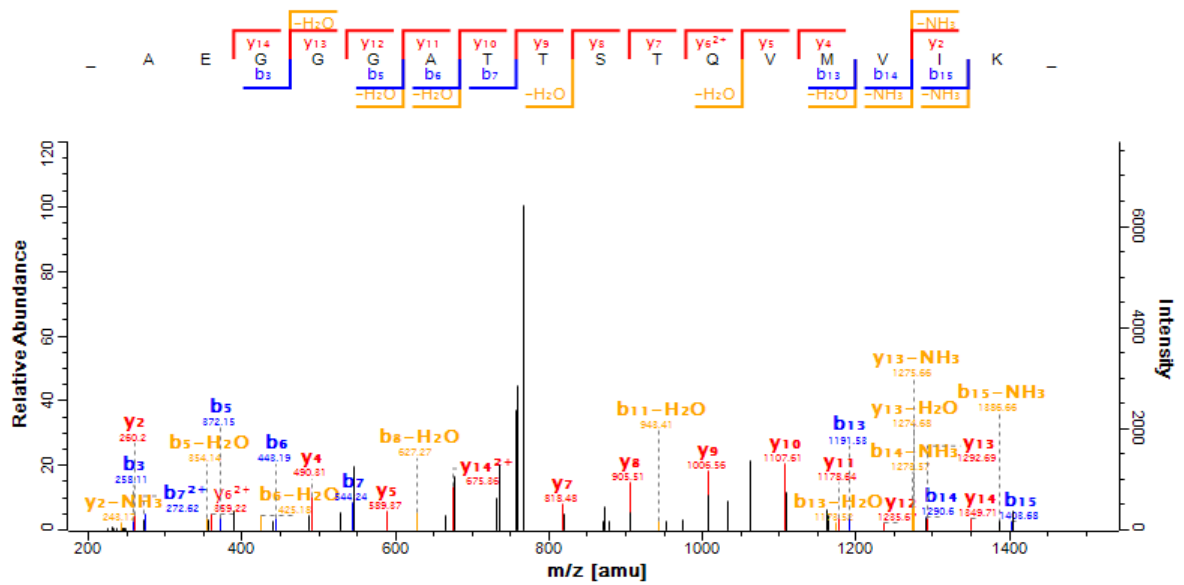

**Protein Group ID:** 2858

**Protein Accession Numbers:** P51809-2; P51809; P51809-3

**Gene Names:** VAMP7

**Peptide Sequence:** AFNFLNEIK

**Total Number of Spectra:** 8

**Number of Replicates (out of 8):** 8

**Best Match Score:** 163.94

**Best Match Posterior Error Probability:** 1.31E-05

**Best Match Spectrum:**

|                    |           |                  |                                     |
|--------------------|-----------|------------------|-------------------------------------|
| <b>Scan number</b> | 59891     | <b>Raw file</b>  | A549-US-Mock-top20CID-Elite-2ug-B12 |
| <b>Method</b>      | ITMS; CID | <b>Genenames</b> | VAMP7                               |

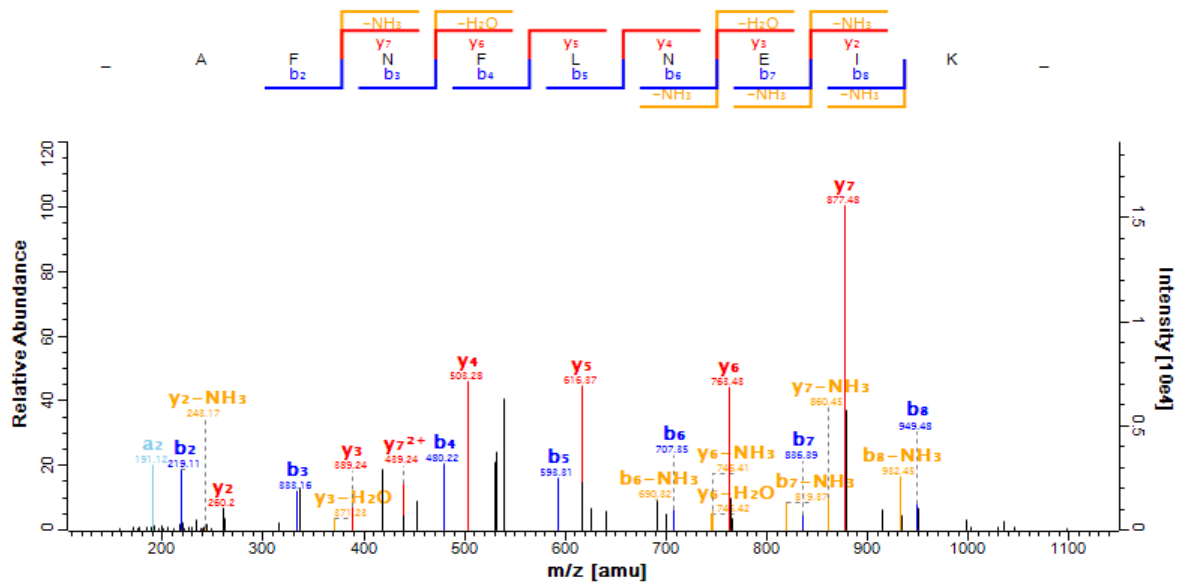

**Protein Group ID:** 2867  
**Protein Accession Numbers:** P52564; P52564-2  
**Gene Names:** MAP2K6  
**Peptide Sequence:** QVVEEPSQLPADK  
**Total Number of Spectra:** 4  
**Number of Replicates (out of 8):** 4  
**Best Match Score:** 156.6  
**Best Match Posterior Error Probability:** 5.42E-08  
**Best Match Spectrum:**

**Scan number** 28328      **Raw file** A549-US-Mock-top20CID-Elite-2ug-B13  
**Method** ITMS; CID      **Genenames** MAP2K6

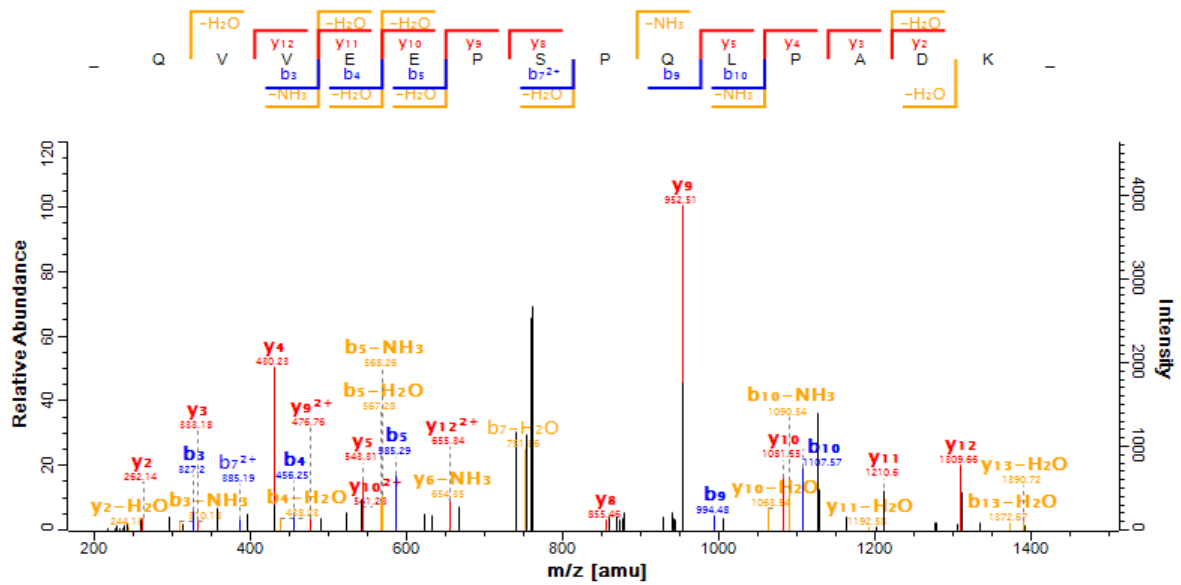

**Protein Group ID:** 2886

**Protein Accession Numbers:** P53567

**Gene Names:** CEBPG

**Peptide Sequence:** DLFLEHAHNLDNVQSISTENTTADGDNAGQ

**Total Number of Spectra:** 1

**Number of Replicates (out of 8):** 1

**Best Match Score:** 74.287

**Best Match Posterior Error Probability:** 7.90E-06

**Best Match Spectrum:**

|                    |           |                  |                                   |
|--------------------|-----------|------------------|-----------------------------------|
| <b>Scan number</b> | 59264     | <b>Raw file</b>  | A549-US-WT-top20CID-Elite-2ug-B14 |
| <b>Method</b>      | ITMS; CID | <b>Genenames</b> | CEBPG                             |

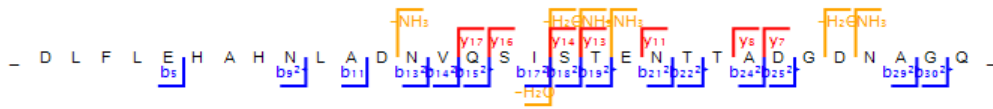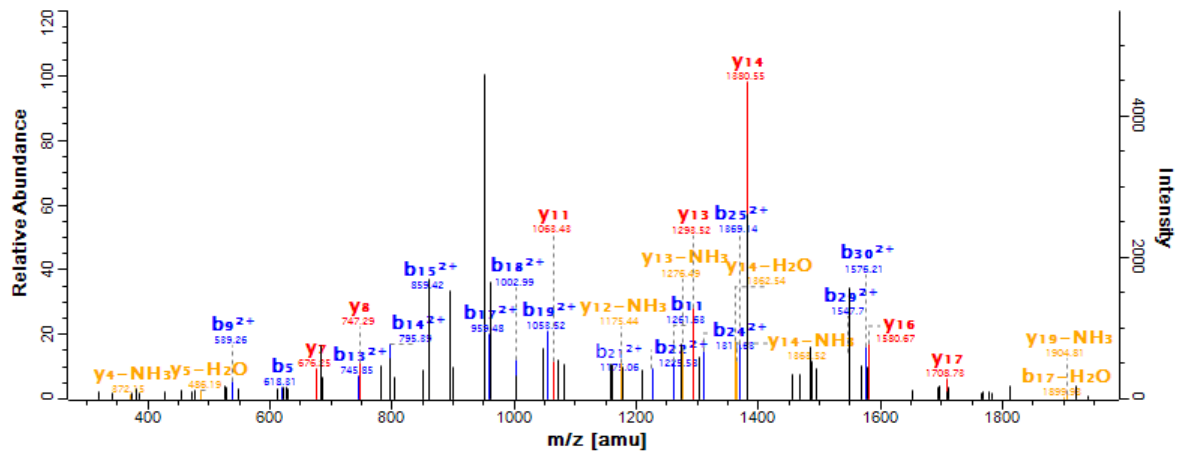

**Protein Group ID:** 2907  
**Protein Accession Numbers:** P54802  
**Gene Names:** NAGLU  
**Peptide Sequence:** FLLGSWLEQAR  
**Total Number of Spectra:** 6  
**Number of Replicates (out of 8):** 6  
**Best Match Score:** 145.91  
**Best Match Posterior Error Probability:** 1.12E-05  
**Best Match Spectrum:**

**Scan number** 72062      **Raw file** A549-US-Mock-top20CID-Elite-2ug-B11  
**Method** ITMS; CID      **Genenames** NAGLU

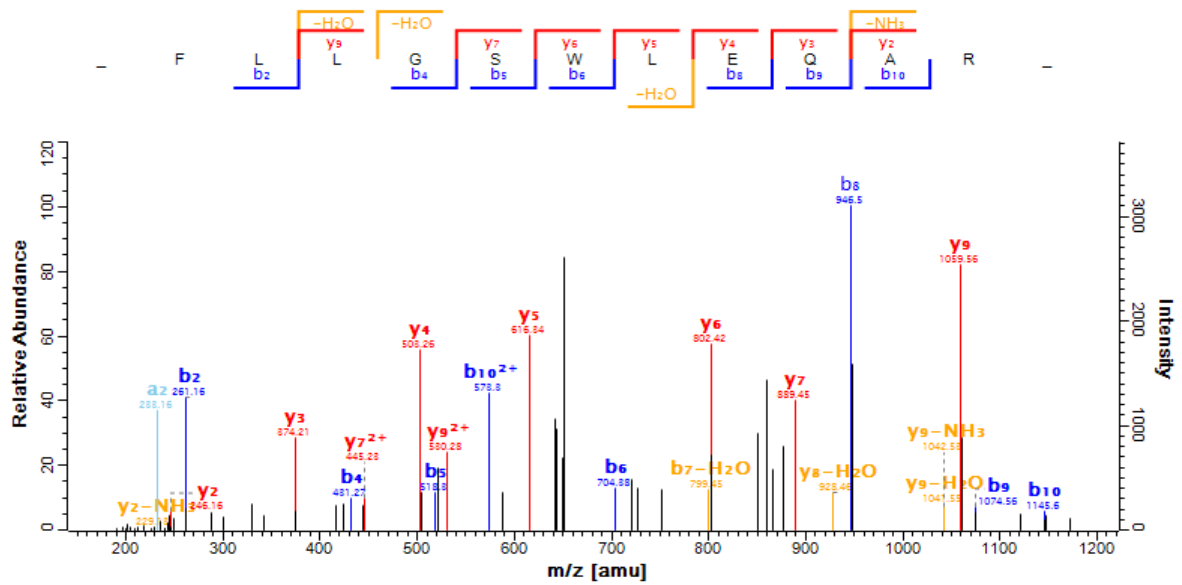

**Protein Group ID:** 2932

**Protein Accession Numbers:** P56962

**Gene Names:** STX17

**Peptide Sequence:** LAALPVAGALIGGMVGGPIGLLAGFK

**Total Number of Spectra:** 1

**Number of Replicates (out of 8):** 1

**Best Match Score:** 112.55

**Best Match Posterior Error Probability:** 1.23E-11

**Best Match Spectrum:**

|                    |           |                  |                                     |
|--------------------|-----------|------------------|-------------------------------------|
| <b>Scan number</b> | 93648     | <b>Raw file</b>  | A549-US-Mock-top20CID-Elite-2ug-B11 |
| <b>Method</b>      | ITMS; CID | <b>Genenames</b> | STX17                               |

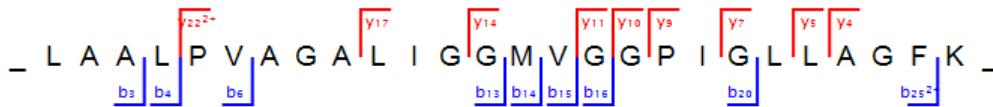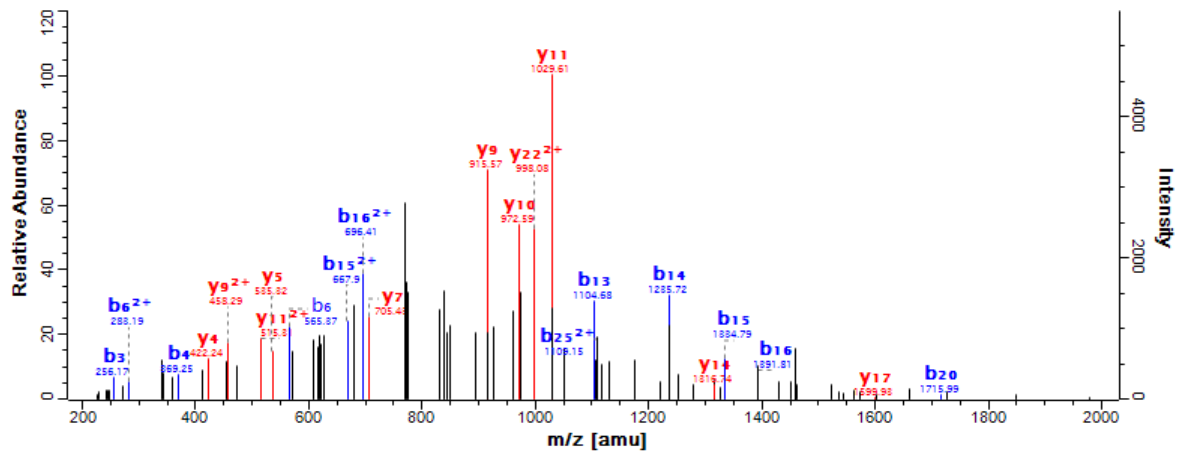

**Protein Group ID:** 2937  
**Protein Accession Numbers:** P57739  
**Gene Names:** CLDN2  
**Peptide Sequence:** SNYYDAYQAQPLATR  
**Total Number of Spectra:** 2  
**Number of Replicates (out of 8):** 2  
**Best Match Score:** 135.23  
**Best Match Posterior Error Probability:** 2.54E-05  
**Best Match Spectrum:**

**Scan number** 34861      **Raw file** A549-US-Mock-top20CID-Elite-2ug-B11  
**Method** ITMS; CID      **Genenames** CLDN2

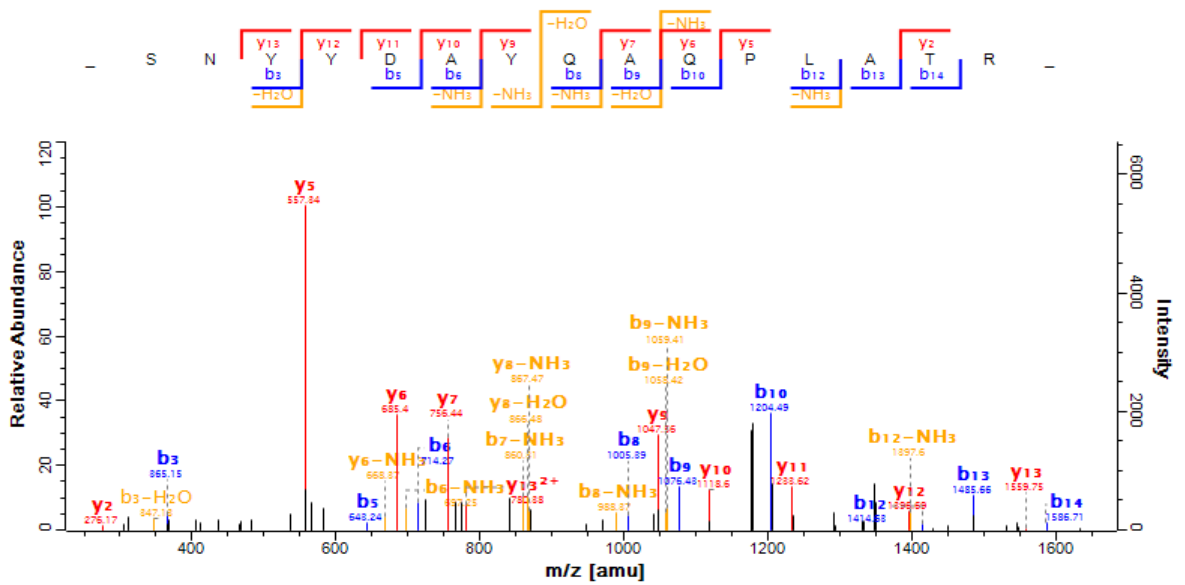

**Protein Group ID:** 2939  
**Protein Accession Numbers:** P57772  
**Gene Names:** EEFSEC  
**Peptide Sequence:** VHLSTGELGIIDSAFGQSGK  
**Total Number of Spectra:** 1  
**Number of Replicates (out of 8):** 1  
**Best Match Score:** 82.449  
**Best Match Posterior Error Probability:** 0.00042249  
**Best Match Spectrum:**

**Scan number** 61537      **Raw file** A549-US-Mock-top20CID-Elite-2ug-B11  
**Method** ITMS; CID      **Genenames** EEFSEC

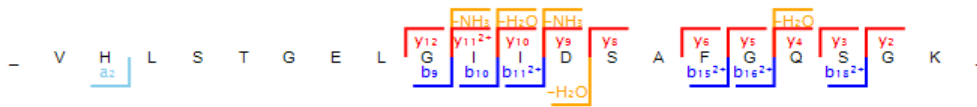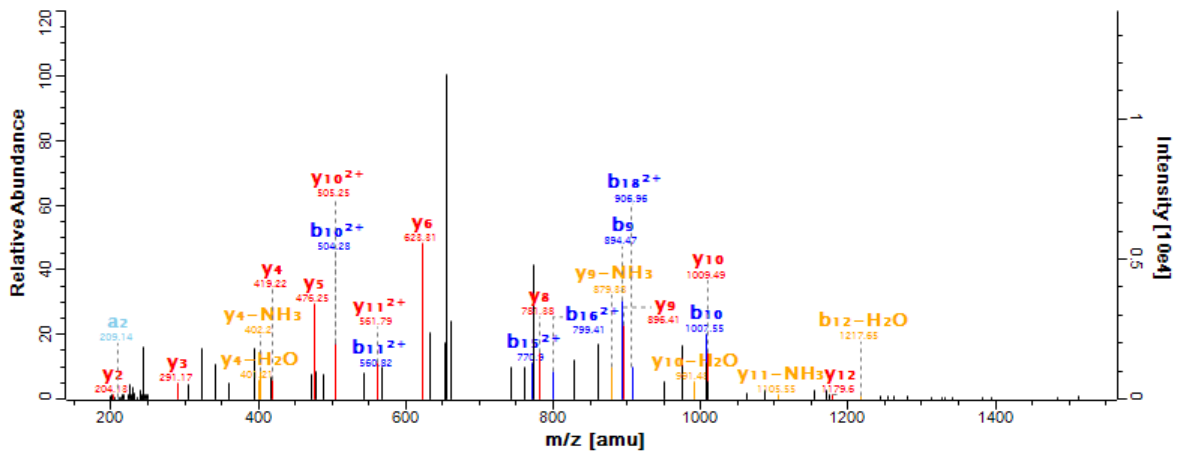



**Protein Group ID:** 2943  
**Protein Accession Numbers:** P59665; P59666  
**Gene Names:** DEFA1;DEFA3  
**Peptide Sequence:** YGTCIYQGR  
**Total Number of Spectra:** 1  
**Number of Replicates (out of 8):** 1  
**Best Match Score:** 130.66  
**Best Match Posterior Error Probability:** 0.00012438  
**Best Match Spectrum:**

**Scan number** 16643      **Raw file** A549-US-WT-top20CID-Elite-2ug-B11  
**Method** ITMS; CID      **Genenames** DEFA1;DEFA3

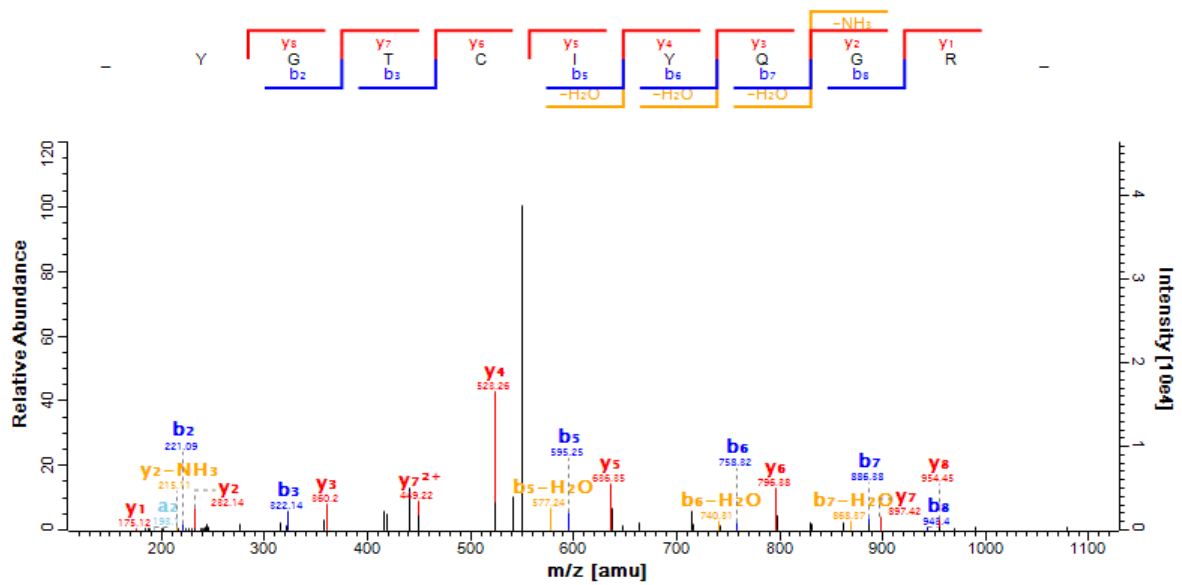

**Protein Group ID:** 2944  
**Protein Accession Numbers:** P60059  
**Gene Names:** SEC61G  
**Peptide Sequence:** MDQVMQFVEPSR  
**Total Number of Spectra:** 8  
**Number of Replicates (out of 8):** 8  
**Best Match Score:** 125.61  
**Best Match Posterior Error Probability:** 0.00014541  
**Best Match Spectrum:**

**Scan number** 78066      **Raw file** A549-US-WT-top20CID-Elite-2ug-B11  
**Method** ITMS; CID      **Genenames** SEC61G

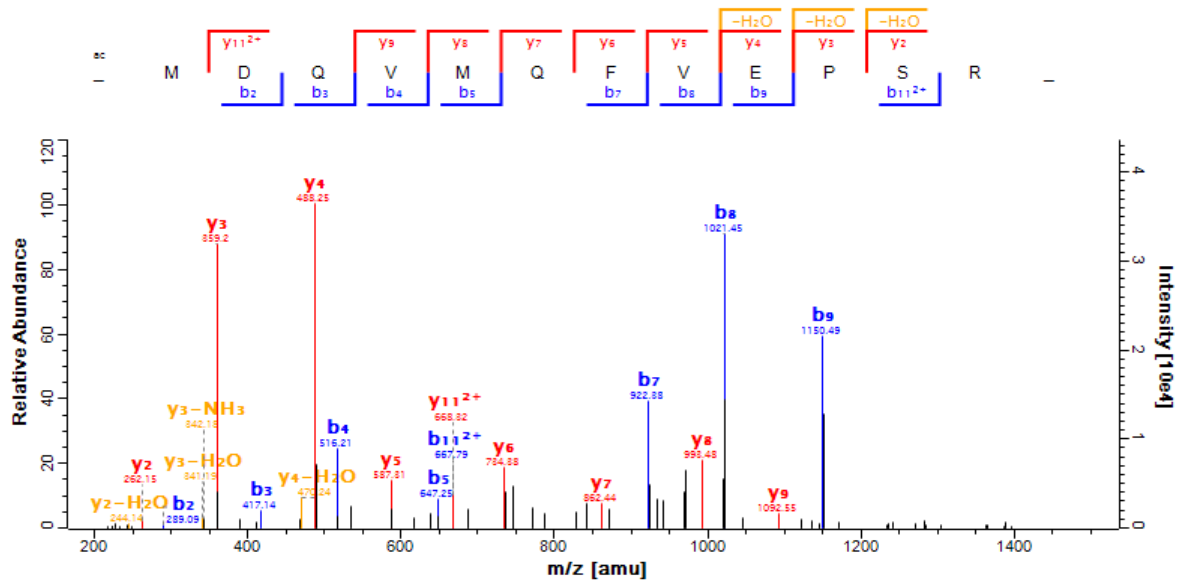

**Protein Group ID:** 2949  
**Protein Accession Numbers:** P60602; P60602-2  
**Gene Names:** ROMO1  
**Peptide Sequence:** PVAVGPYGQSQPSCFDR  
**Total Number of Spectra:** 7  
**Number of Replicates (out of 8):** 7  
**Best Match Score:** 168.64  
**Best Match Posterior Error Probability:** 4.54E-14  
**Best Match Spectrum:**

**Scan number** 34003      **Raw file** A549-US-Mock-top20CID-Elite-2ug-B12  
**Method** ITMS; CID      **Genenames** ROMO1

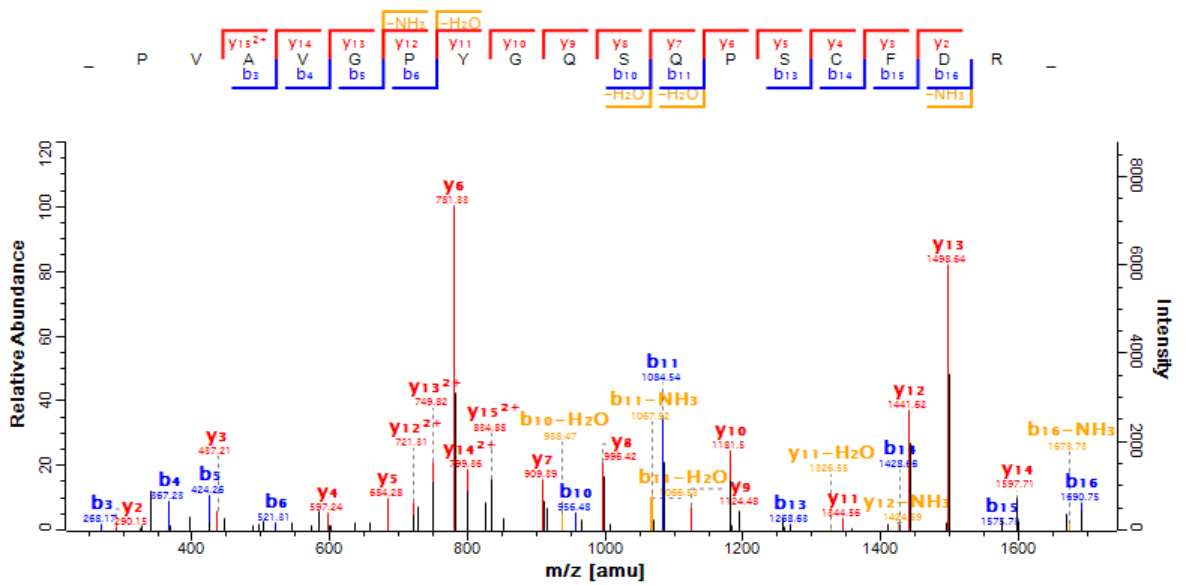

**Protein Group ID:** 2963

**Protein Accession Numbers:** P61020; P61020-2; H0YHA1

**Gene Names:** RAB5B

**Peptide Sequence:** TAMNVNDLFLAIK

**Total Number of Spectra:** 7

**Number of Replicates (out of 8):** 7

**Best Match Score:** 194.48

**Best Match Posterior Error Probability:** 9.05E-25

**Best Match Spectrum:**

|                    |           |                  |                                     |
|--------------------|-----------|------------------|-------------------------------------|
| <b>Scan number</b> | 78517     | <b>Raw file</b>  | A549-US-Mock-top20CID-Elite-2ug-B13 |
| <b>Method</b>      | ITMS; CID | <b>Genenames</b> | RAB5B                               |

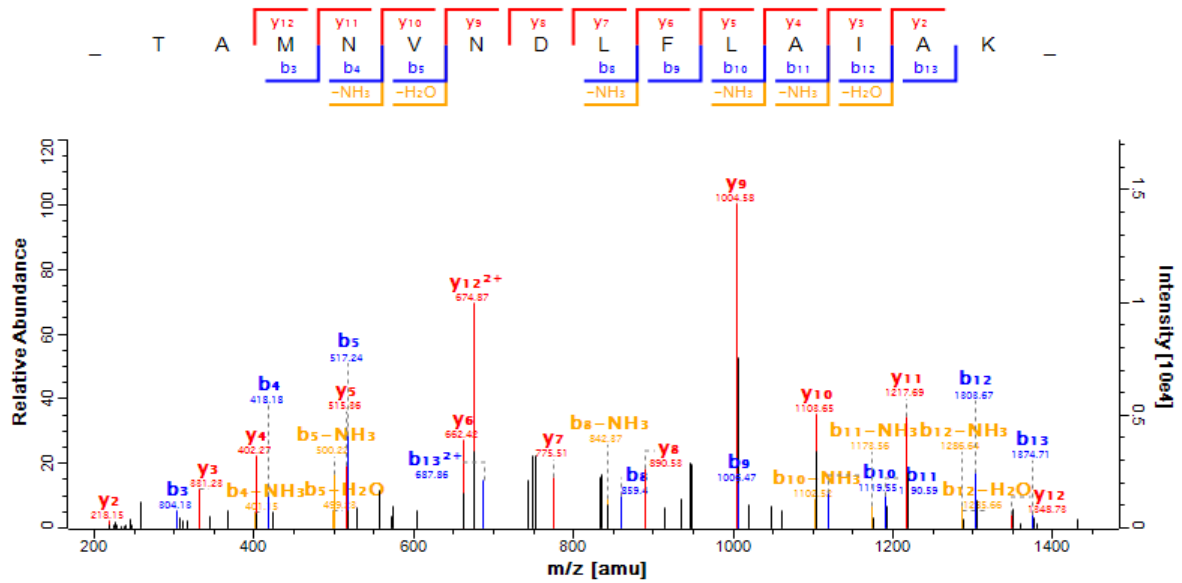

**Protein Group ID:** 2974

**Protein Accession Numbers:** P61204; B7ZB63; H0YGG7

**Gene Names:** ARF3

**Peptide Sequence:** N W Y I Q A T C A T S G D G L Y L Y E G L W Y L A N Q L K

**Total Number of Spectra:** 9

**Number of Replicates (out of 8):** 8

**Best Match Score:** 198.22

**Best Match Posterior Error Probability:** 1.33E-58

**Best Match Spectrum:**

**Scan number** 92832      **Raw file** A549-US-WT-top20CID-Elite-2ug-B14  
**Method** ITMS; CID      **Genenames** ARF3

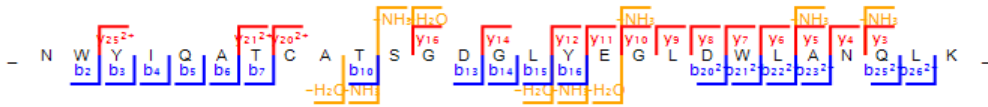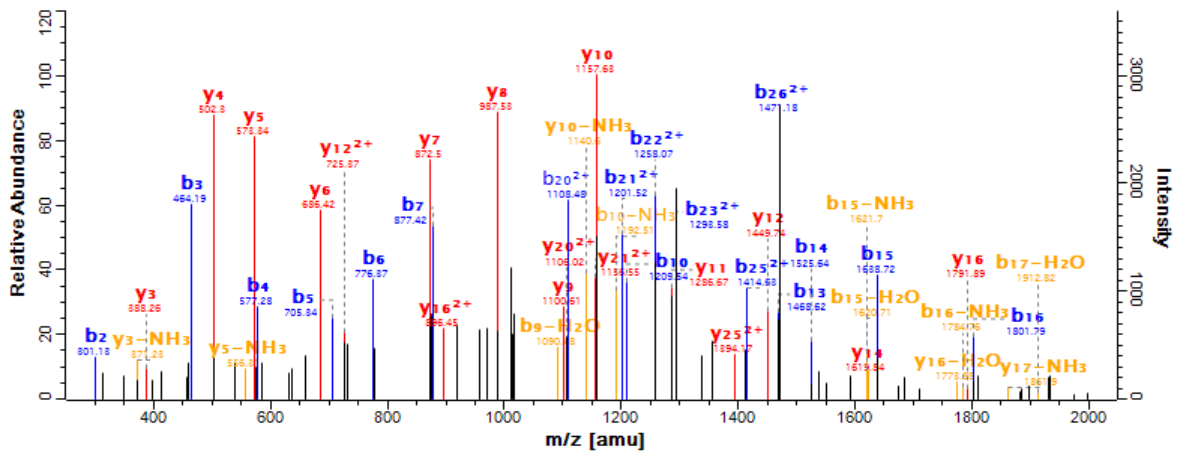

**Protein Group ID:** 2984

**Protein Accession Numbers:** P61601; E5RGA9; E5RIZ1

**Gene Names:** NCALD

**Peptide Sequence:** AEMLEIVQAIYK

**Total Number of Spectra:** 2

**Number of Replicates (out of 8):** 1

**Best Match Score:** 110.38

**Best Match Posterior Error Probability:** 0.00025844

**Best Match Spectrum:**

|                    |           |                  |                                     |
|--------------------|-----------|------------------|-------------------------------------|
| <b>Scan number</b> | 72368     | <b>Raw file</b>  | A549-US-Mock-top20CID-Elite-2ug-B12 |
| <b>Method</b>      | ITMS; CID | <b>Genenames</b> | NCALD                               |

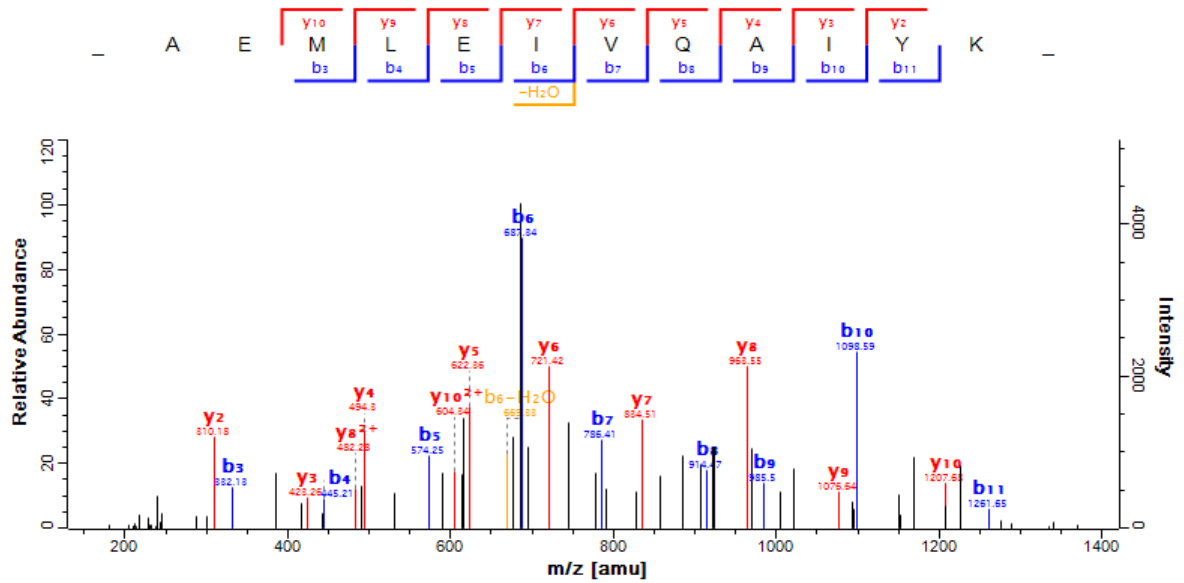

**Protein Group ID:** 2988  
**Protein Accession Numbers:** P61812-2; P61812  
**Gene Names:** TGFB2  
**Peptide Sequence:** FAGIDGTSTYTSGDQK  
**Total Number of Spectra:** 2  
**Number of Replicates (out of 8):** 2  
**Best Match Score:** 96.489  
**Best Match Posterior Error Probability:** 0.00027832  
**Best Match Spectrum:**

**Scan number** 29361      **Raw file** A549-US-Mock-top20CID-Elite-2ug-B13  
**Method** ITMS; CID      **Genenames** TGFB2

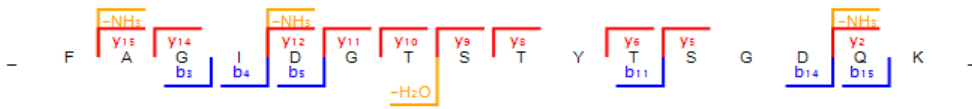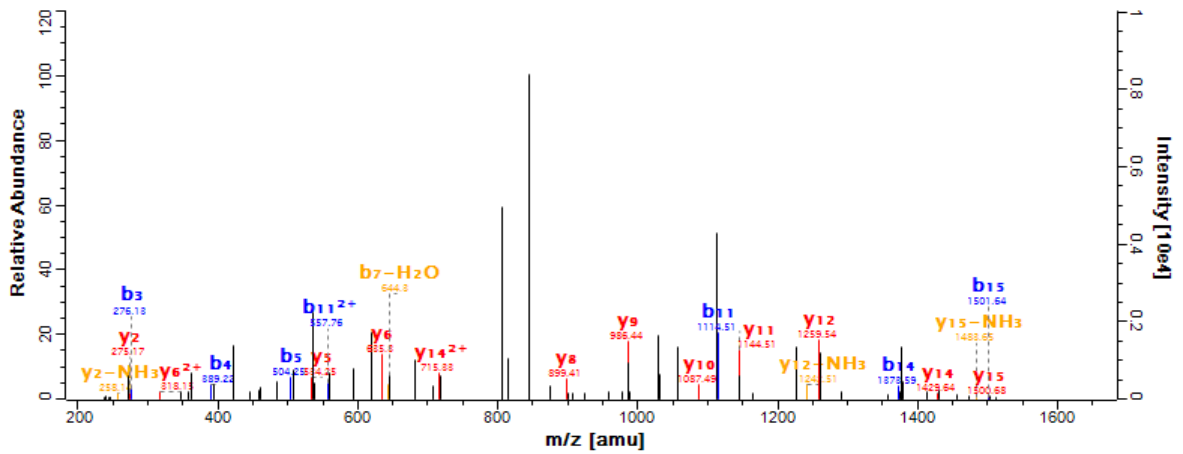

**Protein Group ID:** 3018  
**Protein Accession Numbers:** P62328; Q5T4B6  
**Gene Names:** TMSB4X;TMSL4  
**Peptide Sequence:** SDKPDMAEIEK  
**Total Number of Spectra:** 1  
**Number of Replicates (out of 8):** 1  
**Best Match Score:** 155.99  
**Best Match Posterior Error Probability:** 0.00013559  
**Best Match Spectrum:**

**Scan number** 22596      **Raw file** A549-US-Mock-top20CID-Elite-2ug-B12  
**Method** ITMS; CID      **Genenames** TMSB4X;TMSL4

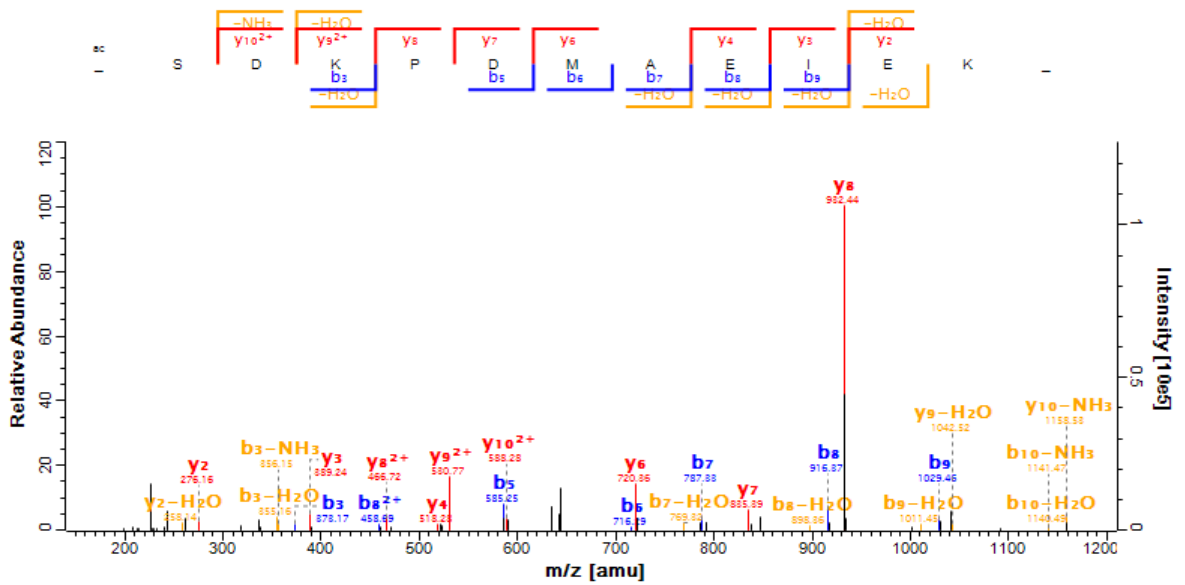





**Protein Group ID:** 3027  
**Protein Accession Numbers:** P62714; E5RJX4  
**Gene Names:** PPP2CB  
**Peptide Sequence:** ELDQWVEQLNECK  
**Total Number of Spectra:** 7  
**Number of Replicates (out of 8):** 7  
**Best Match Score:** 284.24  
**Best Match Posterior Error Probability:** 2.15E-115  
**Best Match Spectrum:**

**Scan number** 55308      **Raw file** A549-US-WT-top20CID-Elite-2ug-B14  
**Method** ITMS; CID      **Genenames** PPP2CB

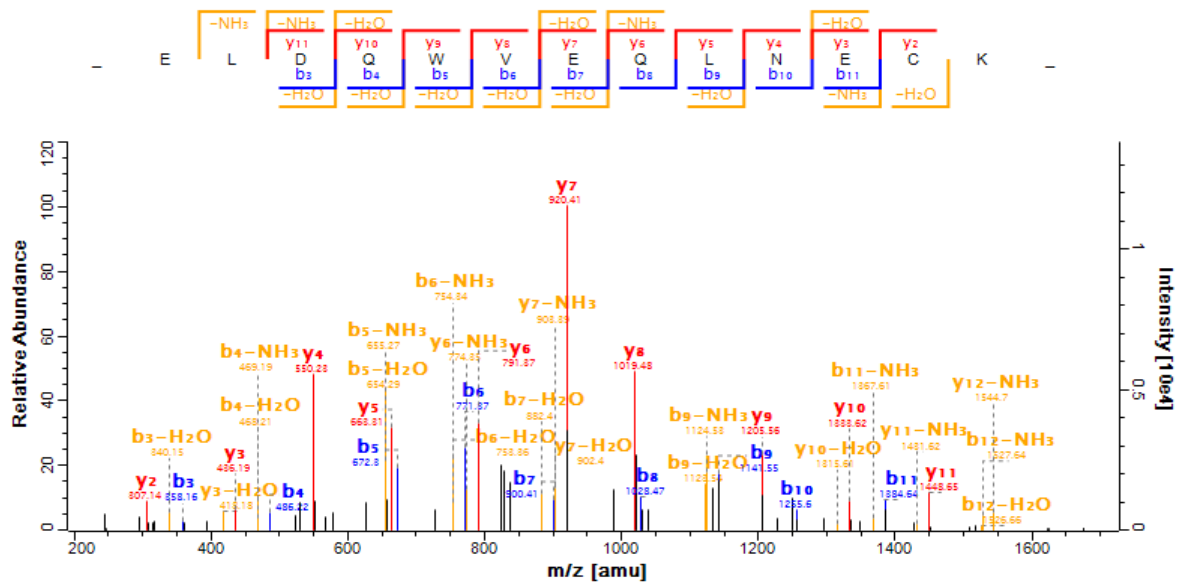

**Protein Group ID:** 3037  
**Protein Accession Numbers:** P62875  
**Gene Names:** POLR2L  
**Peptide Sequence:** MLLAHVDLIEK  
**Total Number of Spectra:** 3  
**Number of Replicates (out of 8):** 3  
**Best Match Score:** 87.298  
**Best Match Posterior Error Probability:** 0.0017584  
**Best Match Spectrum:**

**Scan number** 48288      **Raw file** A549-US-Mock-top20CID-Elite-2ug-B12  
**Method** ITMS; CID      **Genenames** POLR2L

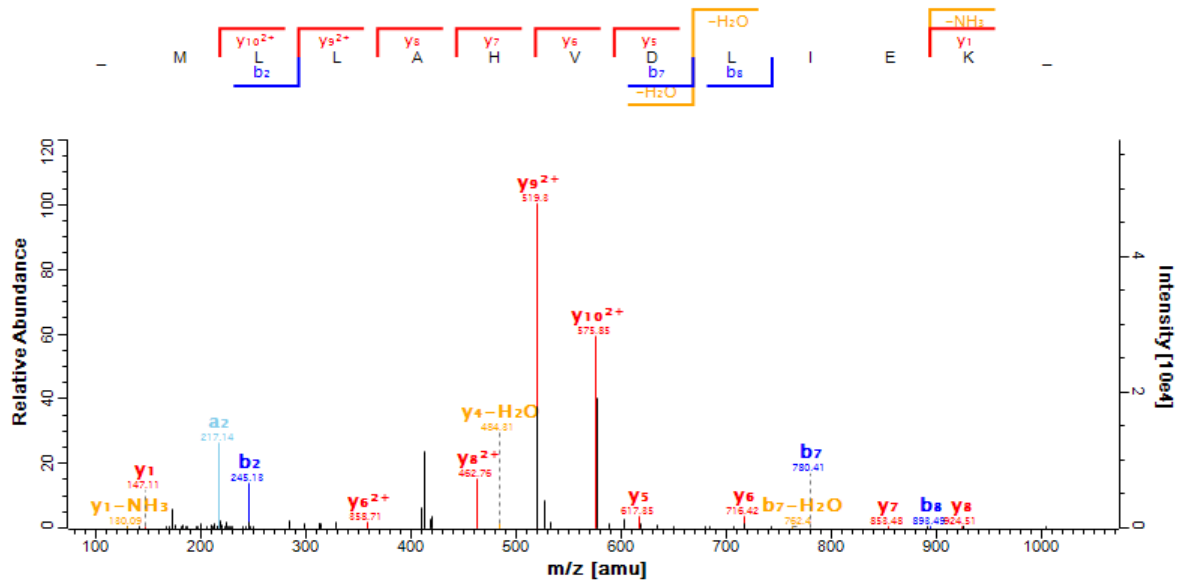



**Protein Group ID:** 3064  
**Protein Accession Numbers:** P63313  
**Gene Names:** TMSB10  
**Peptide Sequence:** ADKPDMGELIASFDK  
**Total Number of Spectra:** 8  
**Number of Replicates (out of 8):** 8  
**Best Match Score:** 199.37  
**Best Match Posterior Error Probability:** 2.58E-24  
**Best Match Spectrum:**

**Scan number** 44116      **Raw file** A549-US-Mock-top20CID-Elite-2ug-B12  
**Method** ITMS; CID      **Genenames** TMSB10

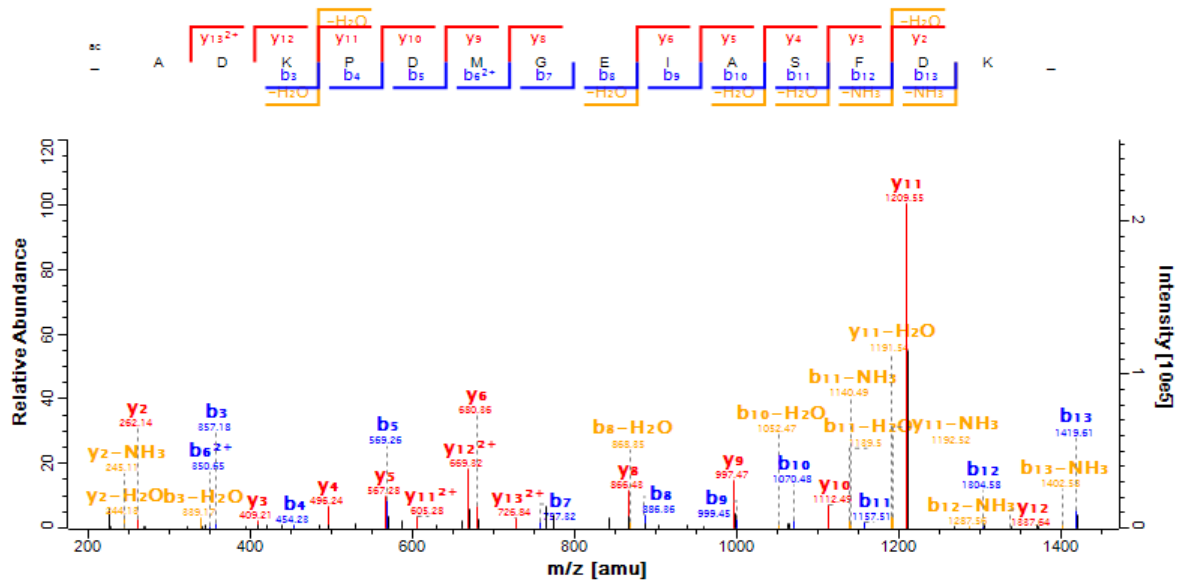

**Protein Group ID:** 3065  
**Protein Accession Numbers:** P67775; P67775-2  
**Gene Names:** PPP2CA  
**Peptide Sequence:** ELDQWIEQLNECK  
**Total Number of Spectra:** 8  
**Number of Replicates (out of 8):** 6  
**Best Match Score:** 208.68  
**Best Match Posterior Error Probability:** 4.10E-31  
**Best Match Spectrum:**

**Scan number** 60713      **Raw file** A549-US-Mock-top20CID-Elite-2ug-B11  
**Method** ITMS; CID      **Genenames** PPP2CA

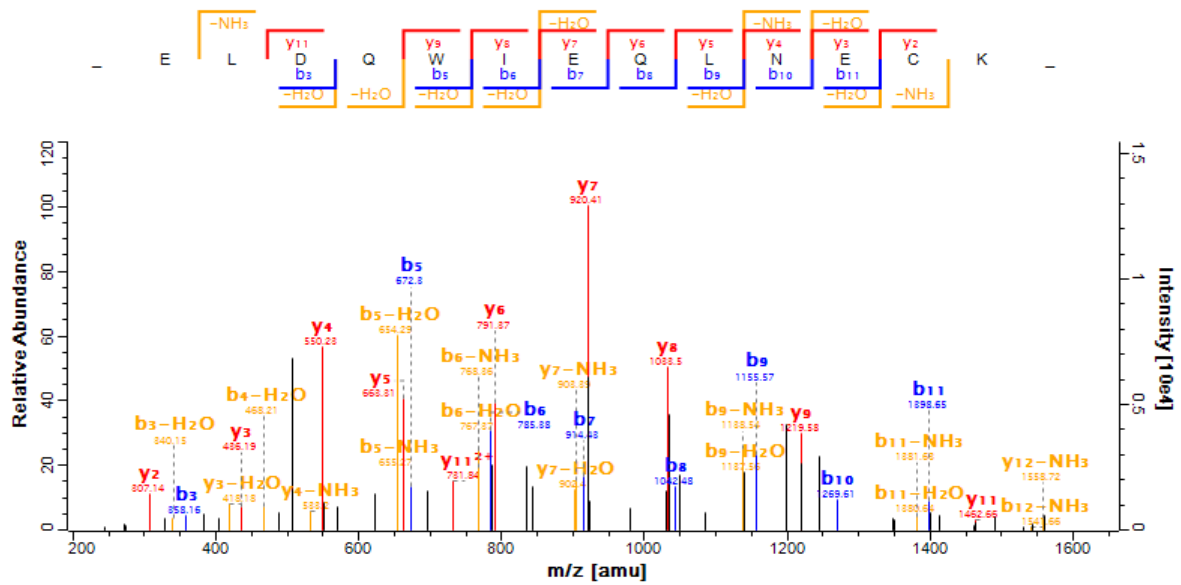

**Protein Group ID:** 3069

**Protein Accession Numbers:** P68032; P62736; P63267; P68133; A6NL76; Q5T8M8; F6QUT6; F6UVQ4; C9JFL5; B8ZZJ2; F8WB63

**Gene Names:** ACTC1;ACTA2;ACTG2;ACTA1

**Peptide Sequence:** YPIEHGIITNWDDMEK

**Total Number of Spectra:** 38

**Number of Replicates (out of 8):** 8

**Best Match Score:** 228.9

**Best Match Posterior Error Probability:** 1.04E-62

**Best Match Spectrum:**

**Scan number** 51439      **Raw file** A549-US-Mock-top20CID-Elite-2ug-B13  
**Method** ITMS: CID      **Genenames** ACTC1;ACTA2;ACTG2;ACTA1

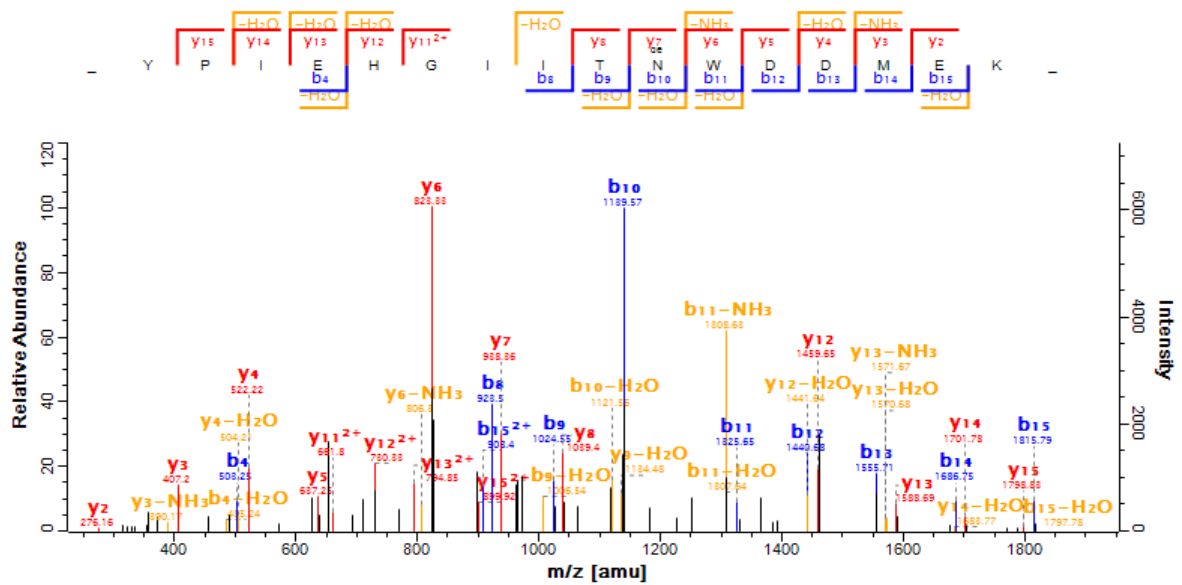

**Protein Group ID:** 3073  
**Protein Accession Numbers:** P68371  
**Gene Names:** TUBB4B  
**Peptide Sequence:** INVYYNEATGGK  
**Total Number of Spectra:** 10  
**Number of Replicates (out of 8):** 5  
**Best Match Score:** 148.62  
**Best Match Posterior Error Probability:** 4.77E-06  
**Best Match Spectrum:**

**Scan number** 24730      **Raw file** A549-US-WT-top20CID-Elite-2ug-B11  
**Method** ITMS; CID      **Genenames** TUBB4B

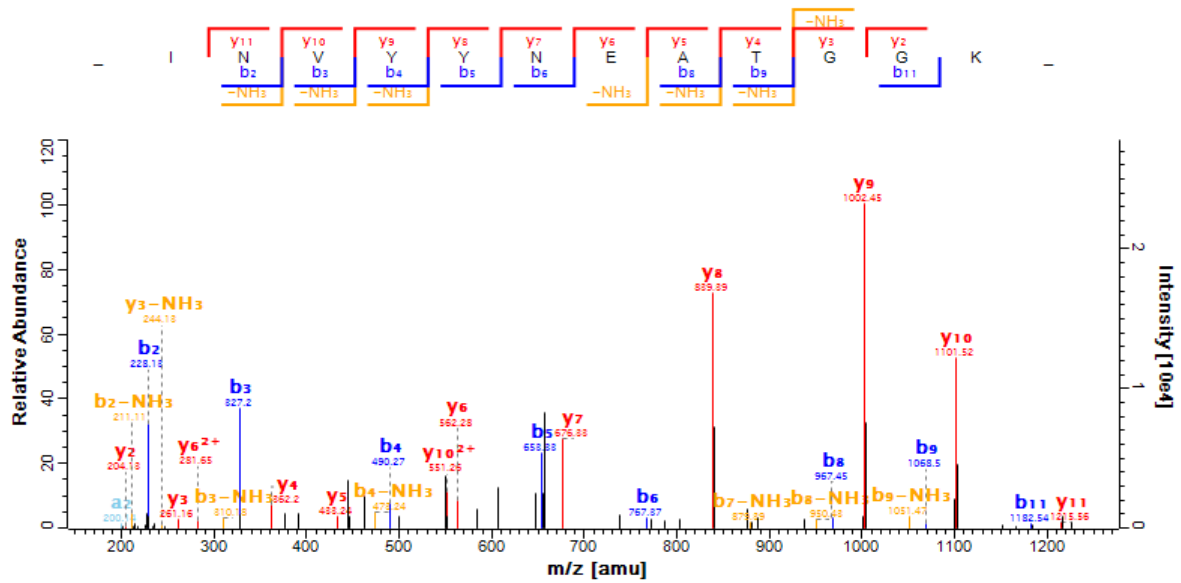



**Protein Group ID:** 3075

**Protein Accession Numbers:** P68431

**Gene Names:** HIST1H3A

**Peptide Sequence:** FQSSAVMALQEACEAYLVGLFEDTNLCAIHK

**Total Number of Spectra:** 14

**Number of Replicates (out of 8):** 8

**Best Match Score:** 149.97

**Best Match Posterior Error Probability:** 4.77E-43

**Best Match Spectrum:**

|                    |           |                  |                                     |
|--------------------|-----------|------------------|-------------------------------------|
| <b>Scan number</b> | 90404     | <b>Raw file</b>  | A549-US-Mock-top20CID-Elite-2ug-B11 |
| <b>Method</b>      | ITMS; CID | <b>Genenames</b> | HIST1H3A                            |

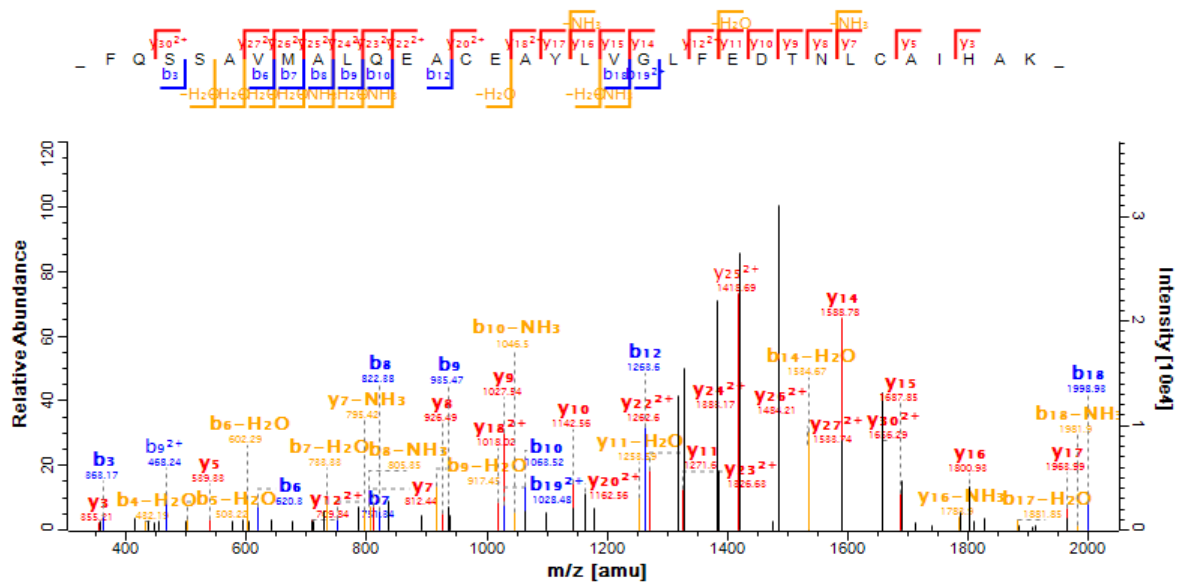

**Protein Group ID:** 3091  
**Protein Accession Numbers:** P80297; H3BT50  
**Gene Names:** MT1X  
**Peptide Sequence:** MDPNCSCSPVGVSCACAGSCK  
**Total Number of Spectra:** 3  
**Number of Replicates (out of 8):** 2  
**Best Match Score:** 150.23  
**Best Match Posterior Error Probability:** 2.66E-08  
**Best Match Spectrum:**

**Scan number** 28132      **Raw file** A549-US-Mock-top20CID-Elite-2ug-B11  
**Method** ITMS; CID      **Genenames** MT1X

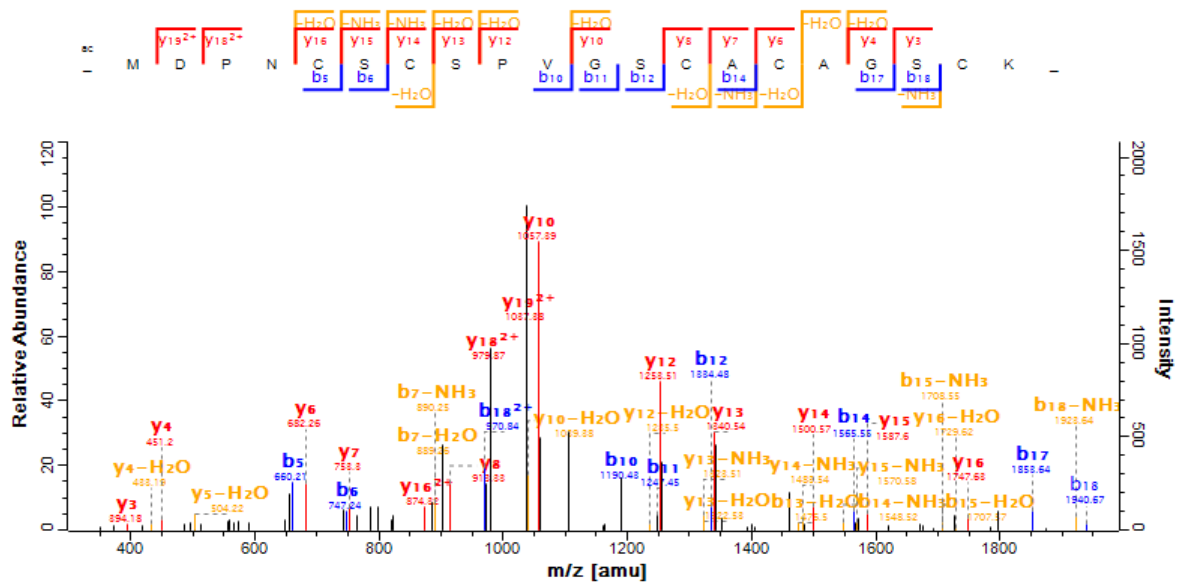

**Protein Group ID:** 3095  
**Protein Accession Numbers:** P82094-2; P82094  
**Gene Names:** TMF1  
**Peptide Sequence:** MGAGSSIENLQSQLK  
**Total Number of Spectra:** 1  
**Number of Replicates (out of 8):** 1  
**Best Match Score:** 135.23  
**Best Match Posterior Error Probability:** 6.33E-08  
**Best Match Spectrum:**

**Scan number** 62336      **Raw file** A549-US-Mock-top20CID-Elite-2ug-B11  
**Method** ITMS; CID      **Genenames** TMF1

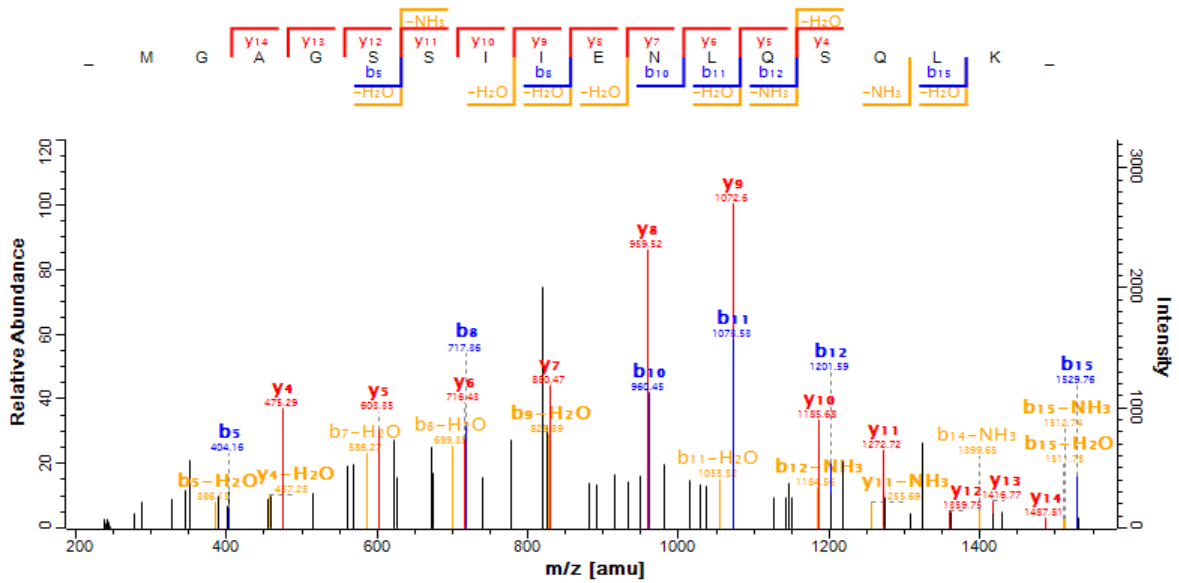

**Protein Group ID:** 3109  
**Protein Accession Numbers:** P83436  
**Gene Names:** COG7  
**Peptide Sequence:** QLATDIDYLVNMDALGLQPSR  
**Total Number of Spectra:** 1  
**Number of Replicates (out of 8):** 1  
**Best Match Score:** 113.26  
**Best Match Posterior Error Probability:** 3.19E-07  
**Best Match Spectrum:**

**Scan number** 96422      **Raw file** A549-US-WT-top20CID-Elite-2ug-B12  
**Method** ITMS; CID      **Genenames** COG7

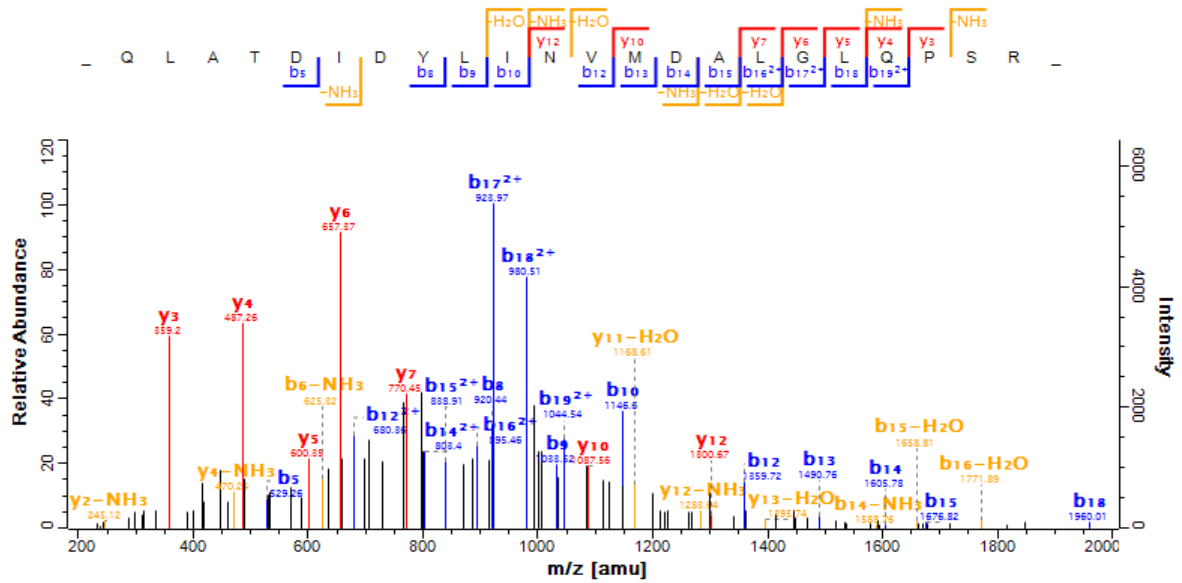

**Protein Group ID:** 3120  
**Protein Accession Numbers:** P98088  
**Gene Names:** MUC5AC  
**Peptide Sequence:** WFDVDFPSPGPHGGDK  
**Total Number of Spectra:** 3  
**Number of Replicates (out of 8):** 3  
**Best Match Score:** 102.73  
**Best Match Posterior Error Probability:** 0.00014957  
**Best Match Spectrum:**

**Scan number** 55949      **Raw file** A549-US-Mock-top20CID-Elite-2ug-B12  
**Method** ITMS; CID      **Genenames** MUC5AC

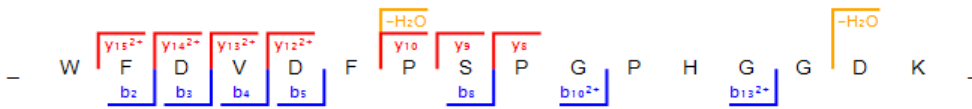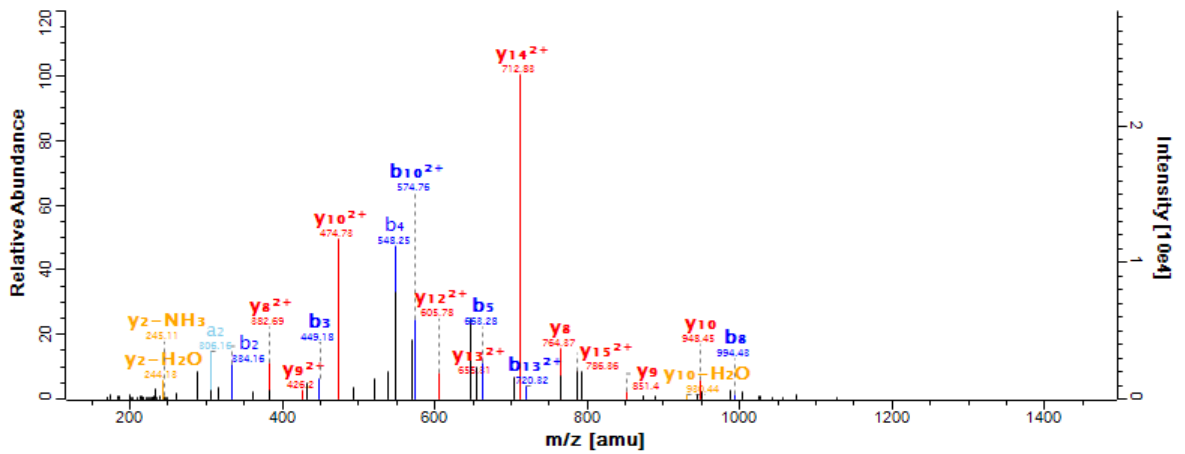

**Protein Group ID:** 3147  
**Protein Accession Numbers:** Q01151  
**Gene Names:** CD83  
**Peptide Sequence:** AFLPVTSPNK  
**Total Number of Spectra:** 1  
**Number of Replicates (out of 8):** 1  
**Best Match Score:** 89.047  
**Best Match Posterior Error Probability:** 0.0021013  
**Best Match Spectrum:**

**Scan number** 41233      **Raw file** A549-US-WT-top20CID-Elite-2ug-B14  
**Method** ITMS; CID      **Genenames** CD83

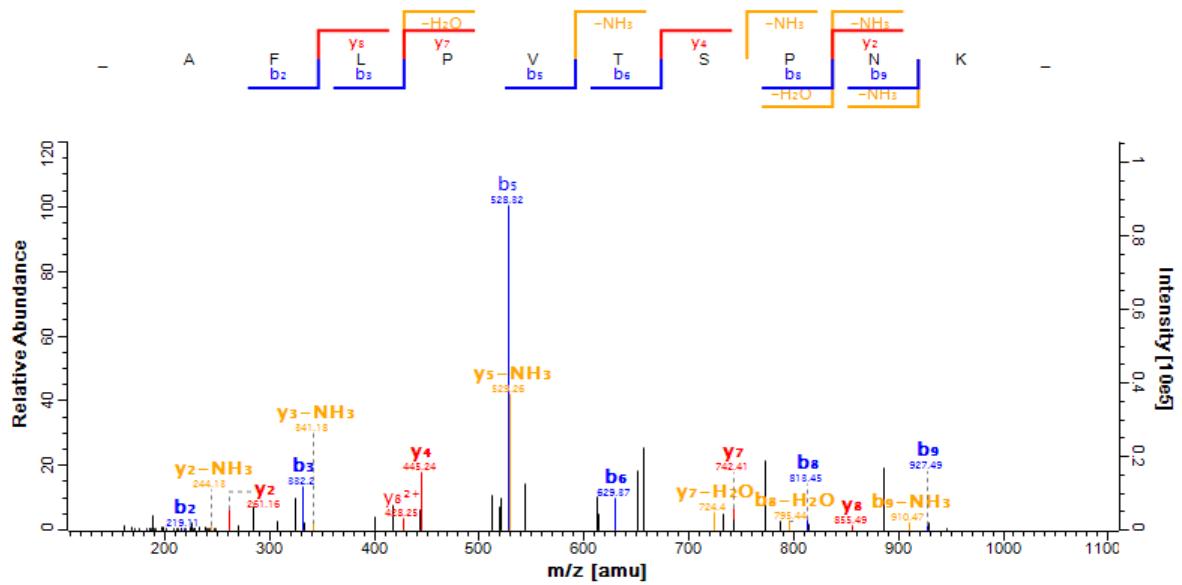

**Protein Group ID:** 3153  
**Protein Accession Numbers:** Q01658  
**Gene Names:** DR1  
**Peptide Sequence:** ELVVNCCTEFIHLISSEANEICK  
**Total Number of Spectra:** 3  
**Number of Replicates (out of 8):** 2  
**Best Match Score:** 66.644  
**Best Match Posterior Error Probability:** 0.0007223  
**Best Match Spectrum:**

**Scan number** 81904      **Raw file** A549-US-Mock-top20CID-Elite-2ug-B12  
**Method** ITMS; CID      **Genenames** DR1

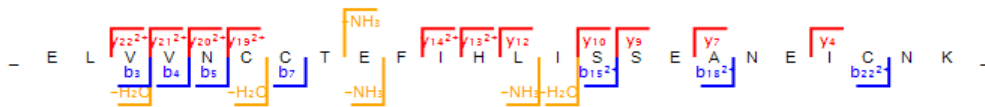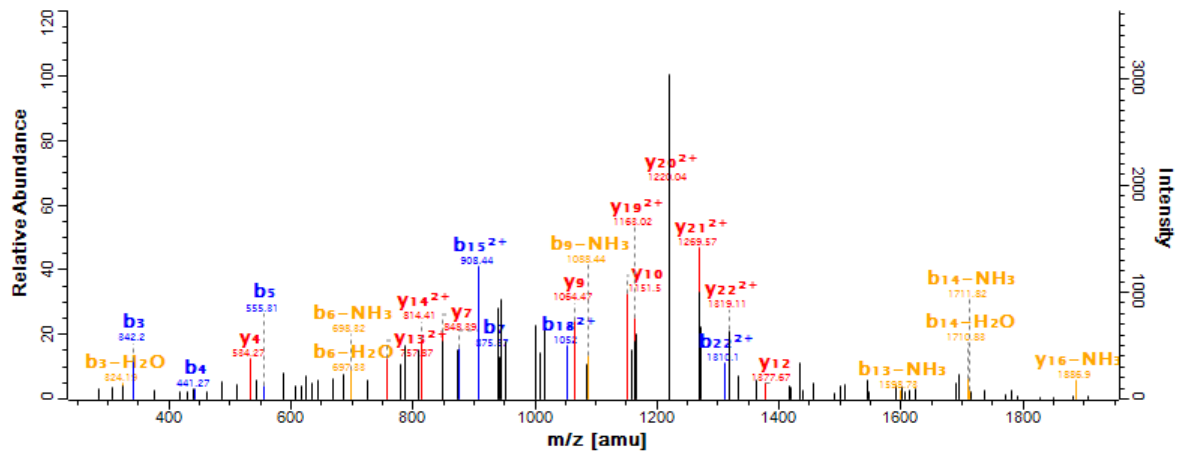

**Protein Group ID:** 3176  
**Protein Accession Numbers:** Q04941  
**Gene Names:** PLP2  
**Peptide Sequence:** HTAAPTDPADGPV  
**Total Number of Spectra:** 7  
**Number of Replicates (out of 8):** 7  
**Best Match Score:** 143  
**Best Match Posterior Error Probability:** 1.79E-13  
**Best Match Spectrum:**

**Scan number** 16248      **Raw file** A549-US-WT-top20CID-Elite-2ug-B12  
**Method** ITMS; CID      **Genenames** PLP2

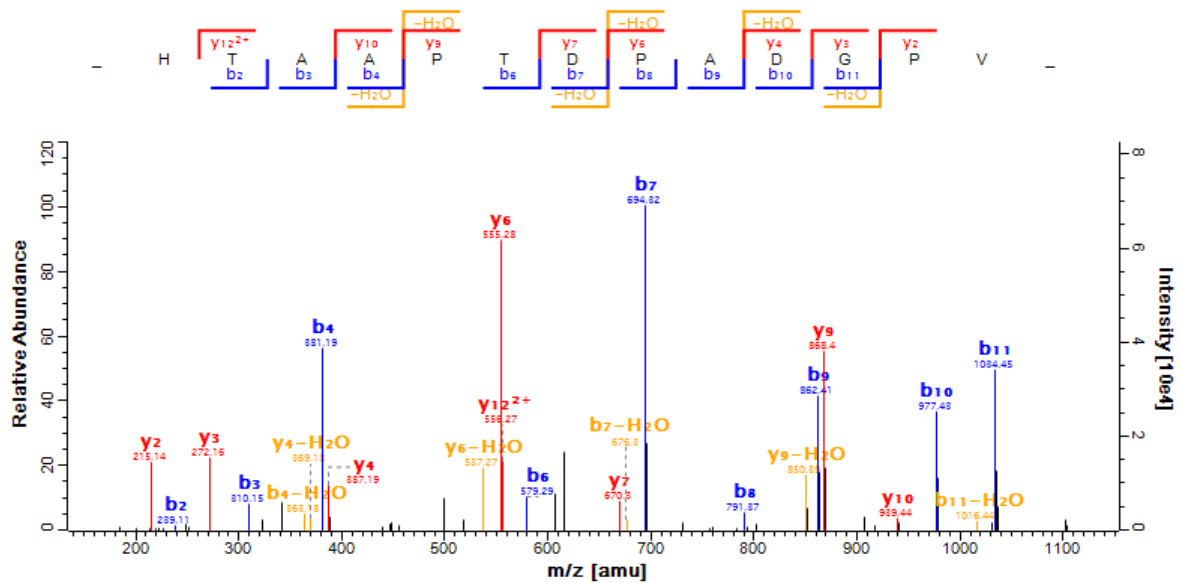



**Protein Group ID:** 3183  
**Protein Accession Numbers:** Q05655-2; Q05655  
**Gene Names:** PRKCD  
**Peptide Sequence:** LLAEALNQVTQR  
**Total Number of Spectra:** 3  
**Number of Replicates (out of 8):** 3  
**Best Match Score:** 164.48  
**Best Match Posterior Error Probability:** 3.90E-08  
**Best Match Spectrum:**

**Scan number** 44965      **Raw file** A549-US-WT-top20CID-Elite-2ug-B13  
**Method** ITMS; CID      **Genenames** PRKCD

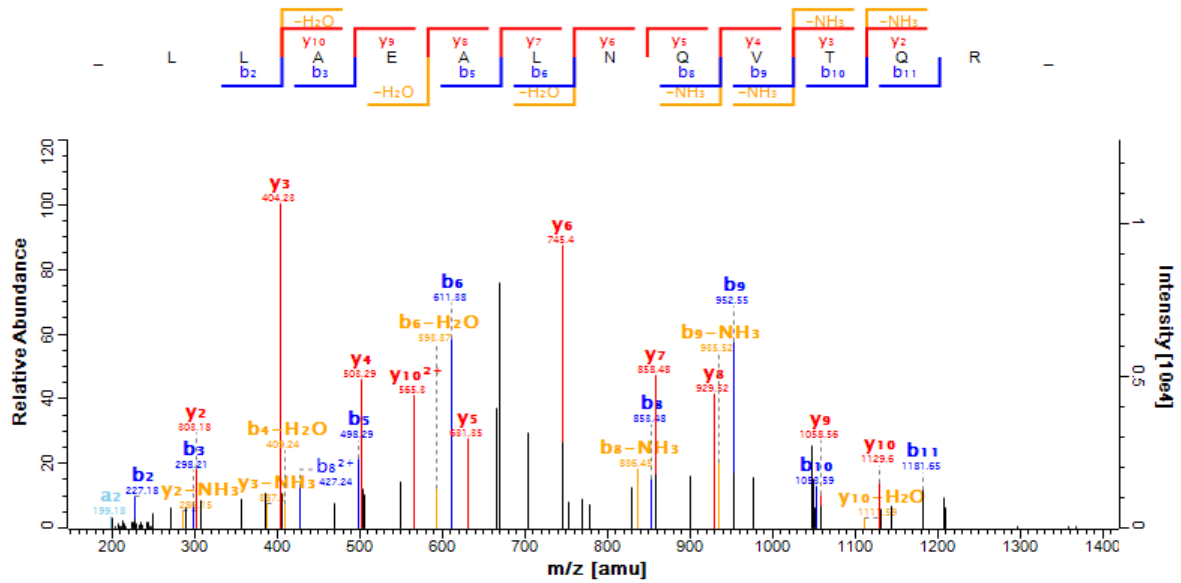

**Protein Group ID:** 3186  
**Protein Accession Numbers:** Q05823; Q6AI46  
**Gene Names:** RNASEL;DKFZp781D08126  
**Peptide Sequence:** EDIVELLR  
**Total Number of Spectra:** 1  
**Number of Replicates (out of 8):** 1  
**Best Match Score:** 93.649  
**Best Match Posterior Error Probability:** 0.0028963  
**Best Match Spectrum:**

|                    |           |                  |                                   |
|--------------------|-----------|------------------|-----------------------------------|
| <b>Scan number</b> | 79735     | <b>Raw file</b>  | A549-US-WT-top20CID-Elite-2ug-B13 |
| <b>Method</b>      | ITMS; CID | <b>Genenames</b> | RNASEL;DKFZp781D08126             |

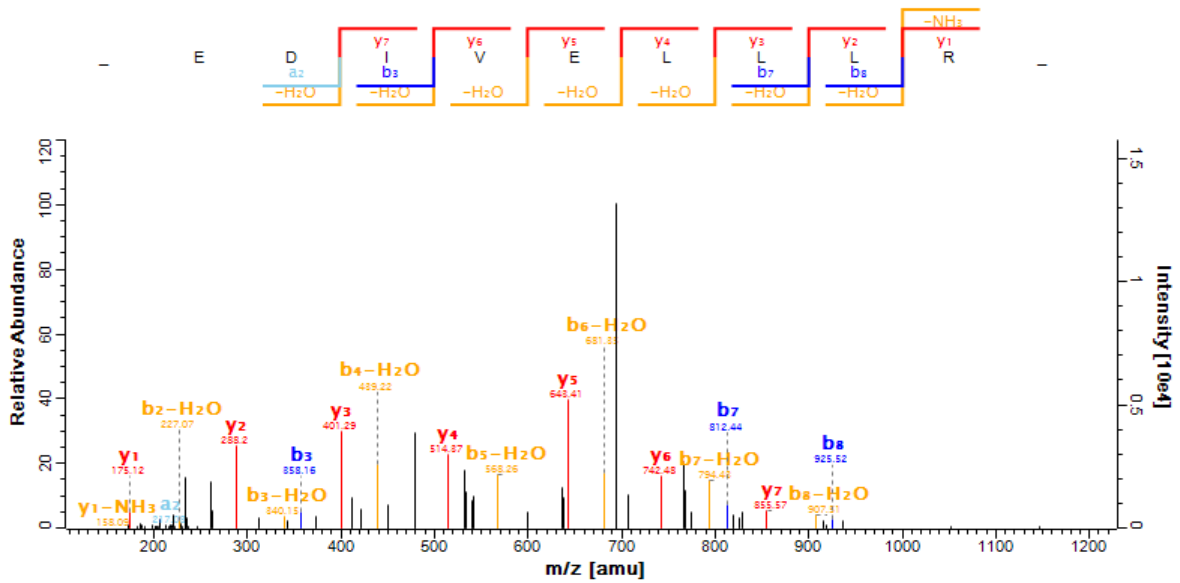

**Protein Group ID:** 3226  
**Protein Accession Numbers:** Q09328  
**Gene Names:** MGAT5  
**Peptide Sequence:** TLAVLLDNILQR  
**Total Number of Spectra:** 2  
**Number of Replicates (out of 8):** 2  
**Best Match Score:** 122.45  
**Best Match Posterior Error Probability:** 0.00010384  
**Best Match Spectrum:**

**Scan number** 84148      **Raw file** A549-US-WT-top20CID-Elite-2ug-B13  
**Method** ITMS; CID      **Genenames** MGAT5

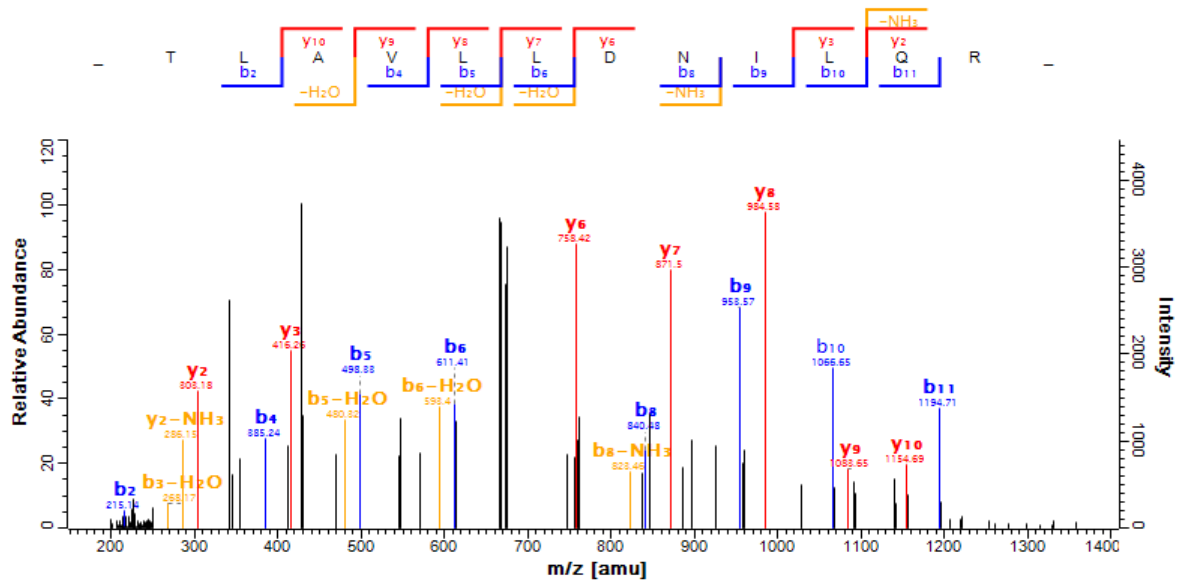

**Protein Group ID:** 3257

**Protein Accession Numbers:** Q12962

**Gene Names:** TAF10

**Peptide Sequence:** ASPAGTAGGPGAGAAAGGTGPLAAR

**Total Number of Spectra:** 10

**Number of Replicates (out of 8):** 8

**Best Match Score:** 177.91

**Best Match Posterior Error Probability:** 3.90E-32

**Best Match Spectrum:**

**Scan number** 25168      **Raw file** A549-US-WT-top20CID-Elite-2ug-B12  
**Method** ITMS; CID      **Genenames** TAF10

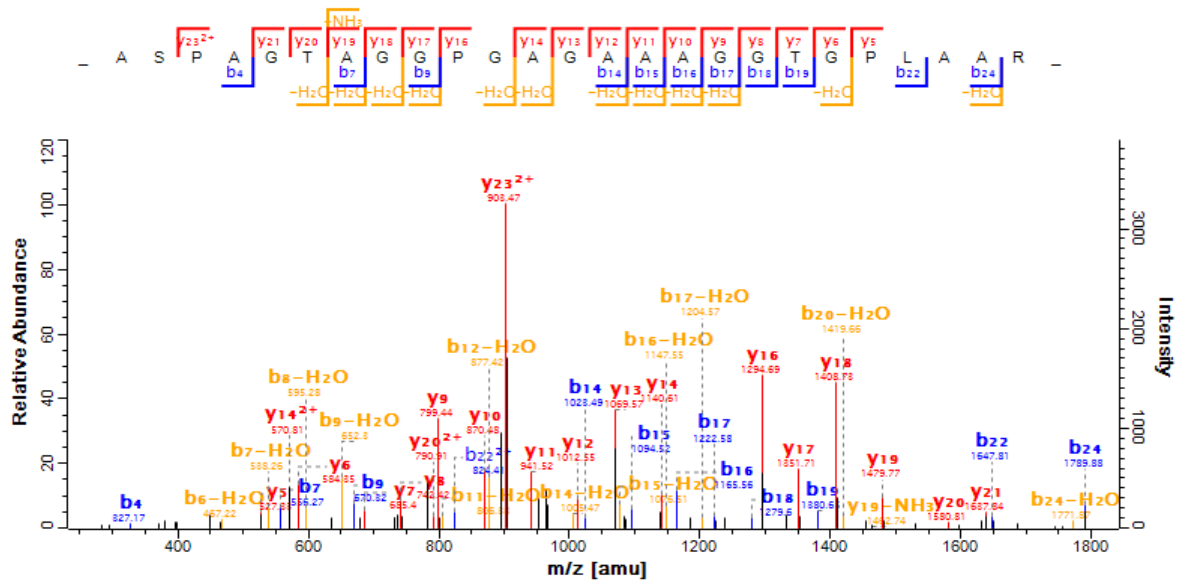

**Protein Group ID:** 3262

**Protein Accession Numbers:** Q12986; Q12986-2; Q12986-3

**Gene Names:** NFX1

**Peptide Sequence:** SPASQADGQSGWR

**Total Number of Spectra:** 4

**Number of Replicates (out of 8):** 3

**Best Match Score:** 94.023

**Best Match Posterior Error Probability:** 0.0010062

**Best Match Spectrum:**

|                    |           |                  |                                     |
|--------------------|-----------|------------------|-------------------------------------|
| <b>Scan number</b> | 11905     | <b>Raw file</b>  | A549-US-Mock-top20CID-Elite-2ug-B13 |
| <b>Method</b>      | ITMS; CID | <b>Genenames</b> | NFX1                                |

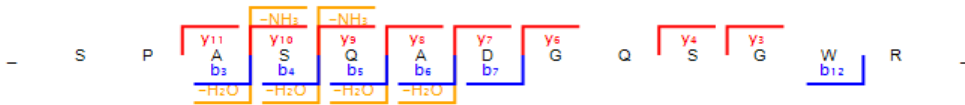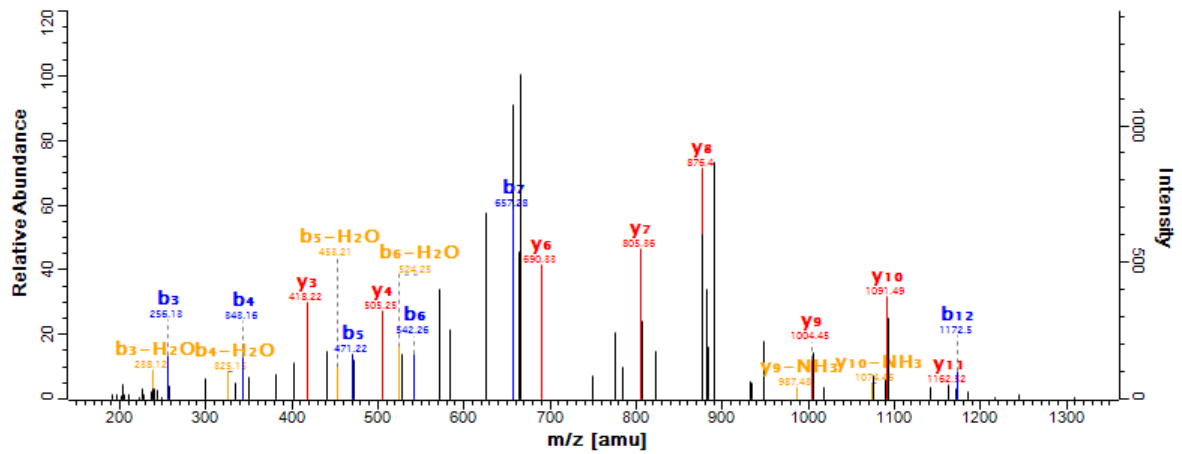

**Protein Group ID:** 3309  
**Protein Accession Numbers:** Q13433  
**Gene Names:** SLC39A6  
**Peptide Sequence:** ALCPDHDS DSSGKDPR  
**Total Number of Spectra:** 1  
**Number of Replicates (out of 8):** 1  
**Best Match Score:** 97.797  
**Best Match Posterior Error Probability:** 0.00099632  
**Best Match Spectrum:**

**Scan number** 3800      **Raw file** A549-US-Mock-top20CID-Elite-2ug-B14  
**Method** ITMS; CID      **Genenames** SLC39A6

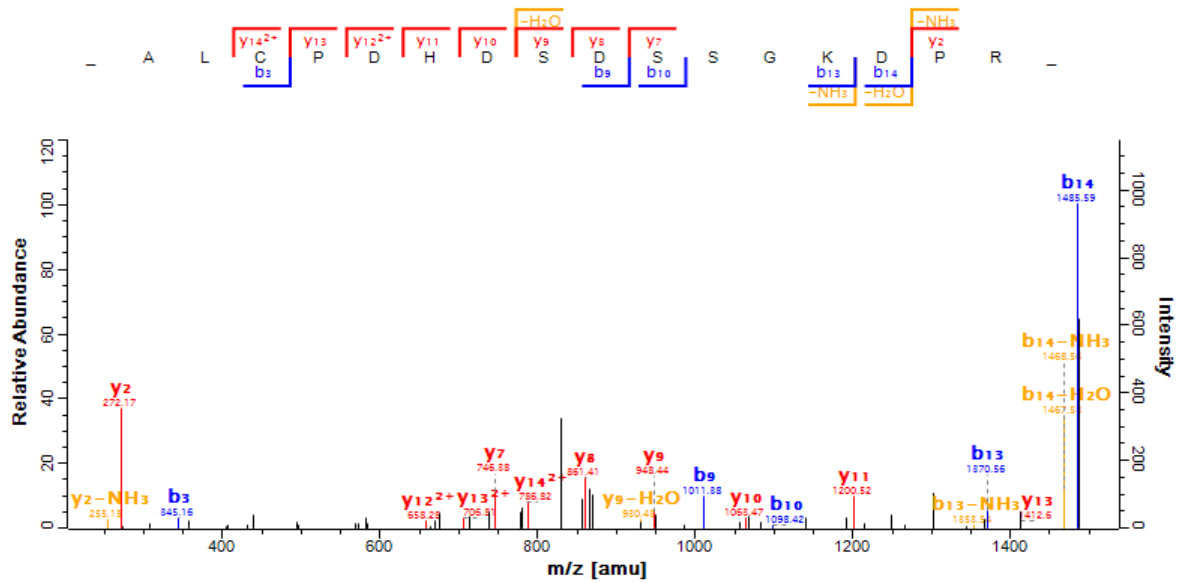

**Protein Group ID:** 3323  
**Protein Accession Numbers:** Q13541  
**Gene Names:** EIF4EBP1  
**Peptide Sequence:** RAGGEESQFEMDI  
**Total Number of Spectra:** 7  
**Number of Replicates (out of 8):** 6  
**Best Match Score:** 118.24  
**Best Match Posterior Error Probability:** 0.00040834  
**Best Match Spectrum:**

**Scan number** 45306      **Raw file** A549-US-WT-top20CID-Elite-2ug-B12  
**Method** ITMS; CID      **Genenames** EIF4EBP1

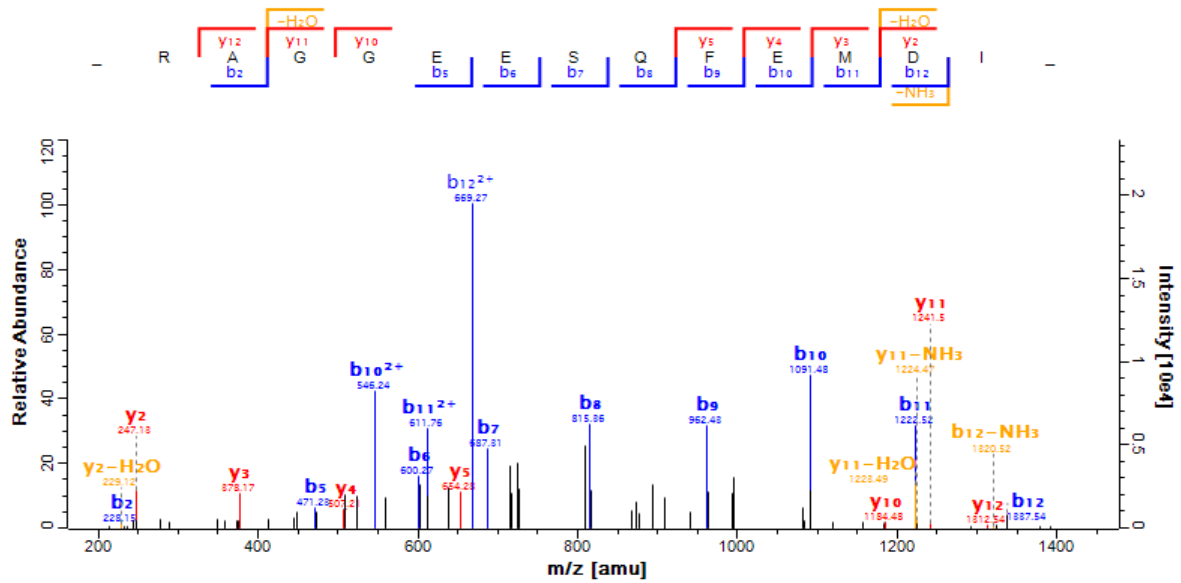

**Protein Group ID:** 3327

**Protein Accession Numbers:** Q13563; Q13563-3; Q13563-5; Q13563-4; Q13563-2

**Gene Names:** PKD2

**Peptide Sequence:** FTEGSLLDGLYWK

**Total Number of Spectra:** 1

**Number of Replicates (out of 8):** 1

**Best Match Score:** 92.295

**Best Match Posterior Error Probability:** 0.0011754

**Best Match Spectrum:**

**Scan number** 72717      **Raw file** A549-US-Mock-top20CID-Elite-2ug-B13  
**Method** ITMS; CID      **Genenames** PKD2

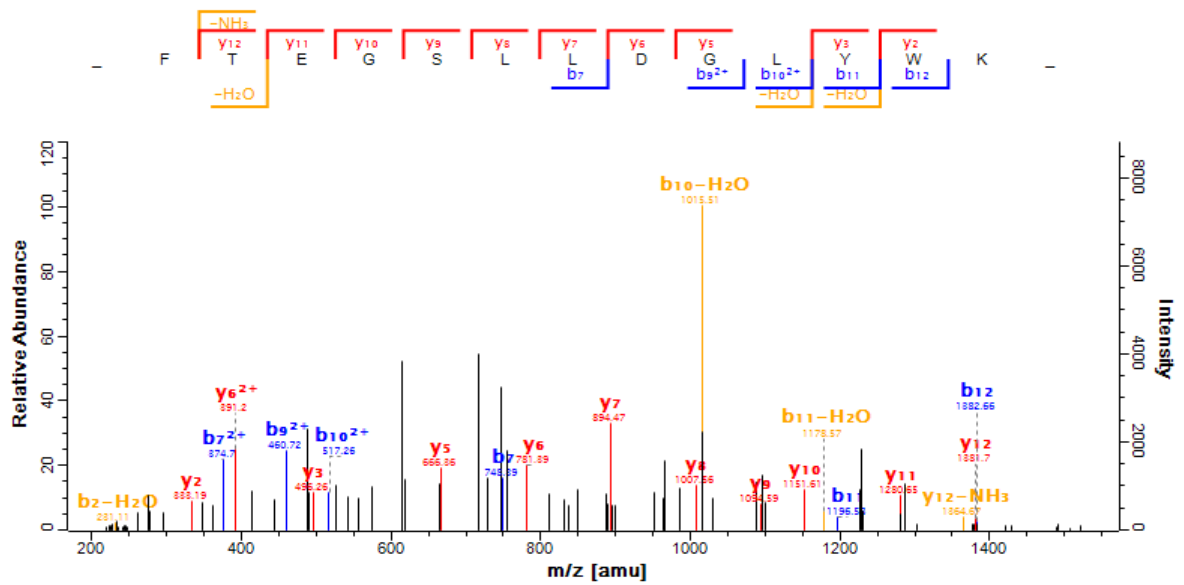



**Protein Group ID:** 3340  
**Protein Accession Numbers:** Q13636  
**Gene Names:** RAB31  
**Peptide Sequence:** NAINIEELFQGISR  
**Total Number of Spectra:** 2  
**Number of Replicates (out of 8):** 2  
**Best Match Score:** 121.18  
**Best Match Posterior Error Probability:** 4.23E-05  
**Best Match Spectrum:**

|                    |           |                  |                                   |
|--------------------|-----------|------------------|-----------------------------------|
| <b>Scan number</b> | 81732     | <b>Raw file</b>  | A549-US-WT-top20CID-Elite-2ug-B14 |
| <b>Method</b>      | ITMS; CID | <b>Genenames</b> | RAB31                             |

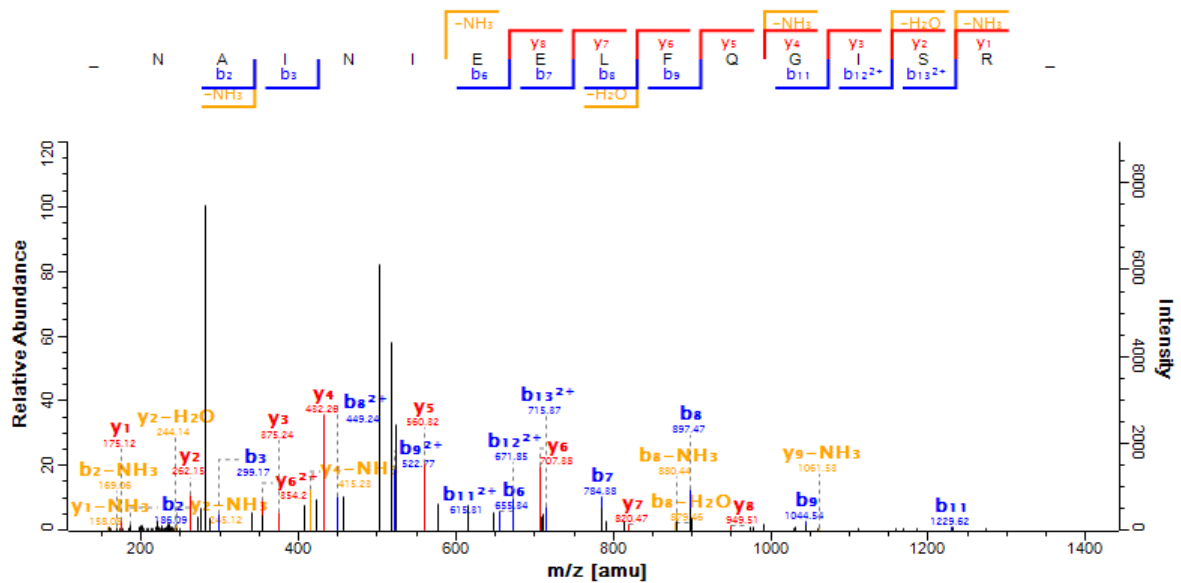

**Protein Group ID:** 3342  
**Protein Accession Numbers:** Q13641  
**Gene Names:** TPBG  
**Peptide Sequence:** NLFLTGNQLAVLPAGAFAR  
**Total Number of Spectra:** 12  
**Number of Replicates (out of 8):** 6  
**Best Match Score:** 193.8  
**Best Match Posterior Error Probability:** 7.95E-32  
**Best Match Spectrum:**

**Scan number** 80120      **Raw file** A549-US-WT-top20CID-Elite-2ug-B14  
**Method** ITMS; CID      **Genenames** TPBG

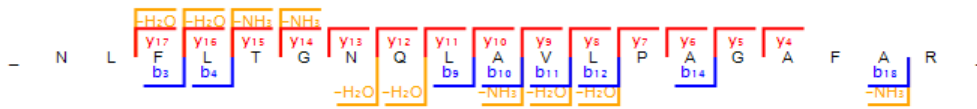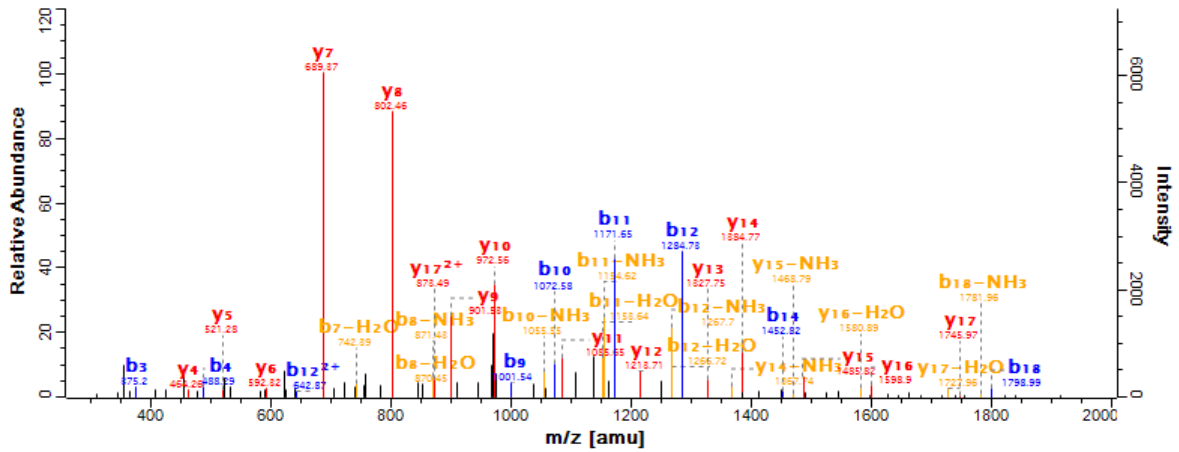

**Protein Group ID:** 3343  
**Protein Accession Numbers:** Q13643  
**Gene Names:** FHL3  
**Peptide Sequence:** TLTQGGVTYR  
**Total Number of Spectra:** 3  
**Number of Replicates (out of 8):** 3  
**Best Match Score:** 86.344  
**Best Match Posterior Error Probability:** 0.0026689  
**Best Match Spectrum:**

**Scan number** 14813      **Raw file** A549-US-Mock-top20CID-Elite-2ug-B13  
**Method** ITMS; CID      **Genenames** FHL3

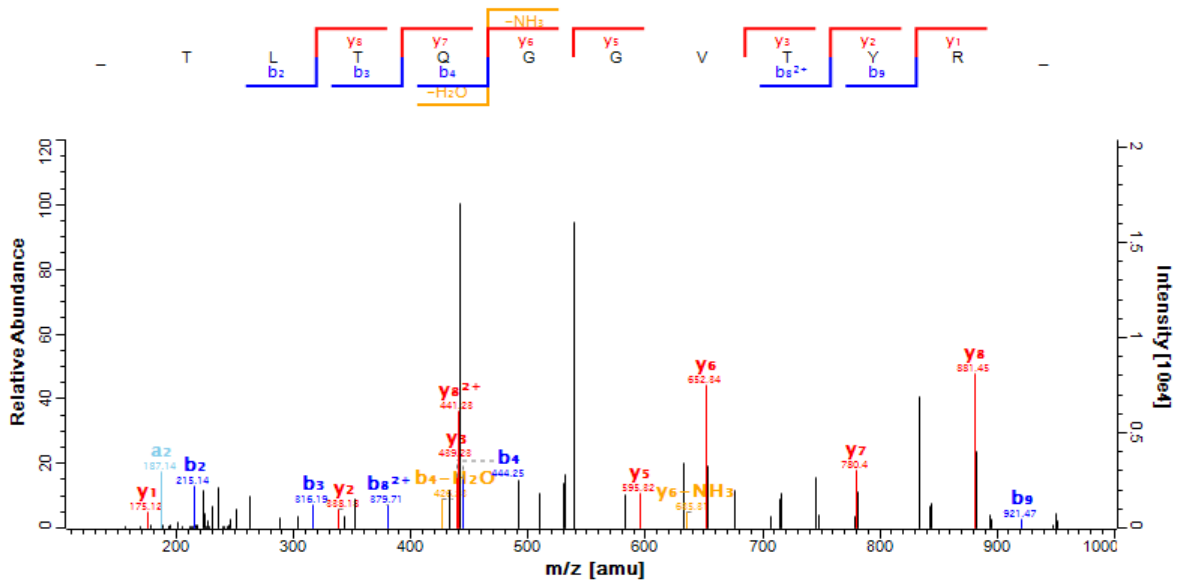



**Protein Group ID:** 3354

**Protein Accession Numbers:** Q13901

**Gene Names:** CID

**Peptide Sequence:** AGEEINEDYPVEIHEYLSAFENSI GAVDEMLK

**Total Number of Spectra:** 2

**Number of Replicates (out of 8):** 2

**Best Match Score:** 117.96

**Best Match Posterior Error Probability:** 3.49E-16

**Best Match Spectrum:**

**Scan number** 95536      **Raw file** A549-US-Mock-top20CID-Elite-2ug-B12  
**Method** ITMS; CID      **Genenames** CID

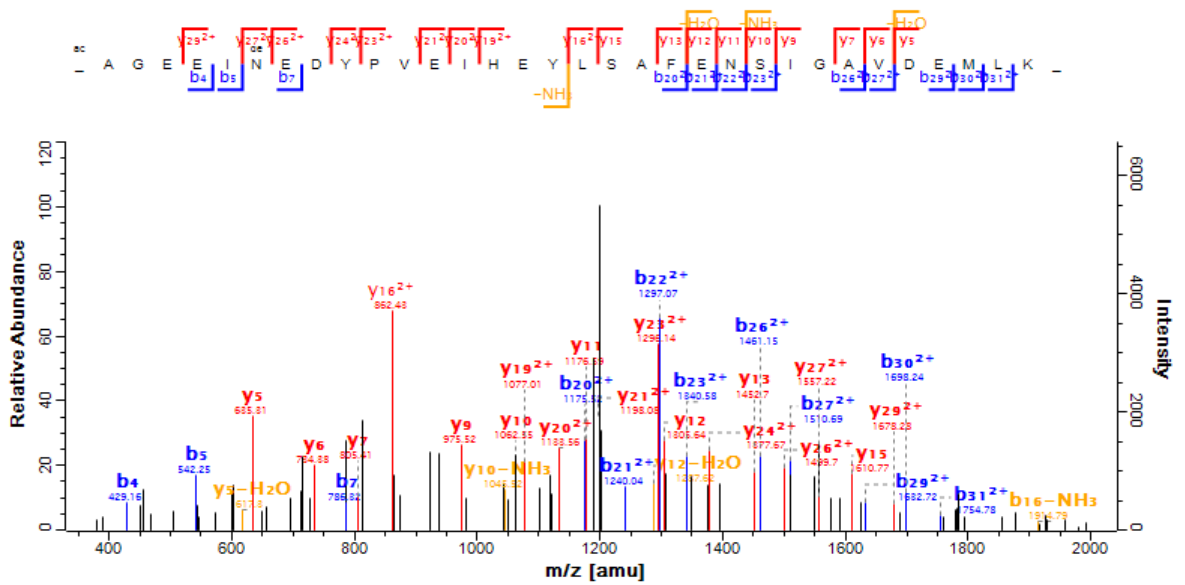



**Protein Group ID:** 3379  
**Protein Accession Numbers:** Q14191  
**Gene Names:** WRN  
**Peptide Sequence:** IGLVISPLISLMEDQVLQLK  
**Total Number of Spectra:** 1  
**Number of Replicates (out of 8):** 1  
**Best Match Score:** 69.935  
**Best Match Posterior Error Probability:** 0.0019496  
**Best Match Spectrum:**

**Scan number** 95303      **Raw file** A549-US-Mock-top20CID-Elite-2ug-B14  
**Method** ITMS; CID      **Genenames** WRN

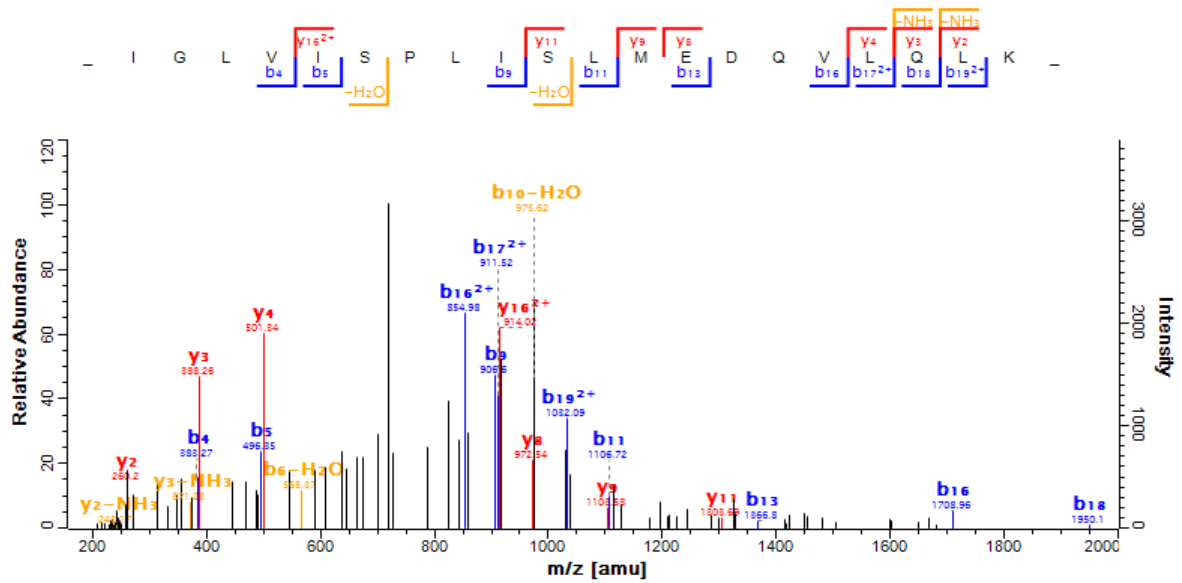

**Protein Group ID:** 3382  
**Protein Accession Numbers:** Q14241  
**Gene Names:** TCEB3  
**Peptide Sequence:** AFSSPQEEEEAGFTGR  
**Total Number of Spectra:** 4  
**Number of Replicates (out of 8):** 3  
**Best Match Score:** 128.64  
**Best Match Posterior Error Probability:** 6.35E-05  
**Best Match Spectrum:**

**Scan number** 31860      **Raw file** A549-US-WT-top20CID-Elite-2ug-B13  
**Method** ITMS; CID      **Genenames** TCEB3

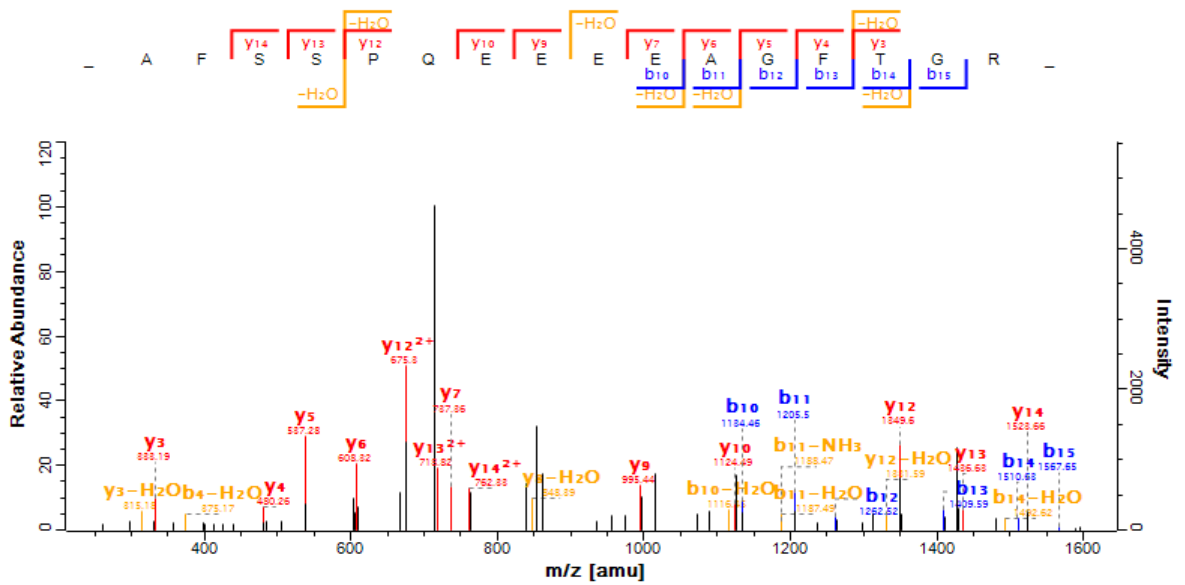



**Protein Group ID:** 3392

**Protein Accession Numbers:** Q14451-3; Q14451; Q14451-4

**Gene Names:** GRB7

**Peptide Sequence:** FTDLLQLVEFHQLNR

**Total Number of Spectra:** 1

**Number of Replicates (out of 8):** 1

**Best Match Score:** 124.12

**Best Match Posterior Error Probability:** 3.69E-05

**Best Match Spectrum:**

|                    |           |                  |                                     |
|--------------------|-----------|------------------|-------------------------------------|
| <b>Scan number</b> | 77441     | <b>Raw file</b>  | A549-US-Mock-top20CID-Elite-2ug-B11 |
| <b>Method</b>      | ITMS; CID | <b>Genenames</b> | GRB7                                |

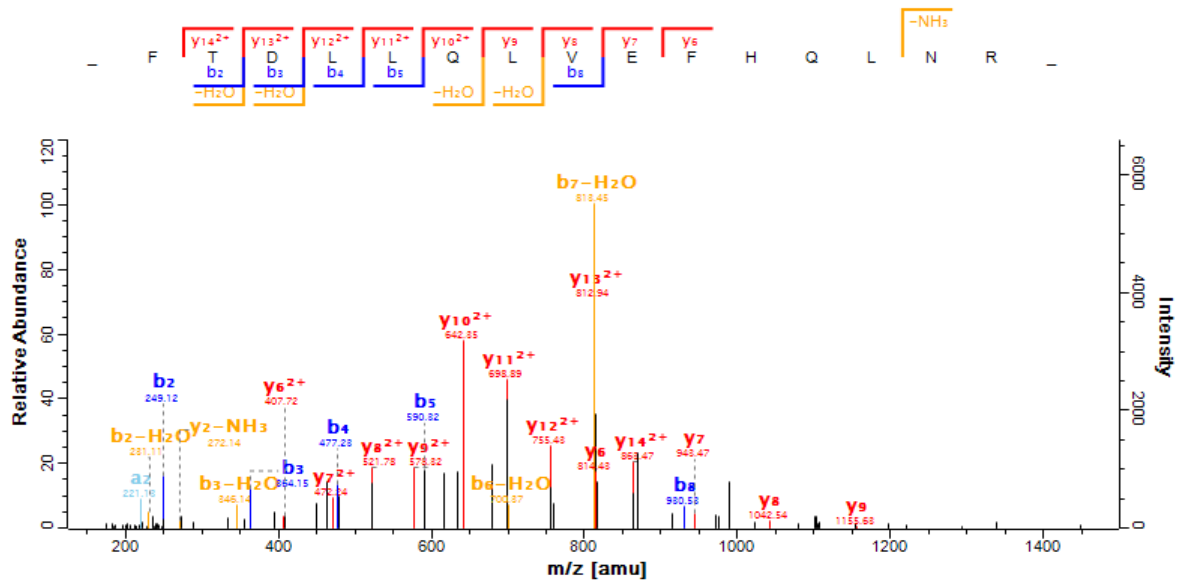

**Protein Group ID:** 3458  
**Protein Accession Numbers:** Q15155; H3BUC9  
**Gene Names:** NOMO1  
**Peptide Sequence:** ALGQAASDNSGPEDAK  
**Total Number of Spectra:** 9  
**Number of Replicates (out of 8):** 8  
**Best Match Score:** 199.15  
**Best Match Posterior Error Probability:** 8.11E-29  
**Best Match Spectrum:**

**Scan number** 7997      **Raw file** A549-US-WT-top20CID-Elite-2ug-B11  
**Method** ITMS; CID      **Genenames** NOMO1

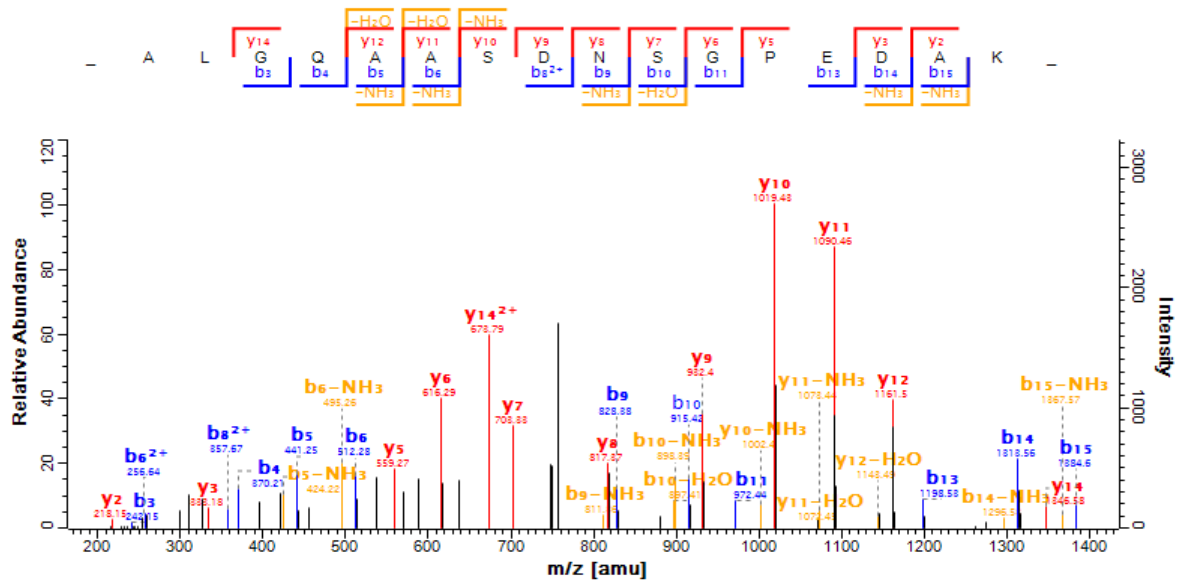

**Protein Group ID:** 3488  
**Protein Accession Numbers:** Q15464; Q15464-2  
**Gene Names:** SHB  
**Peptide Sequence:** VTIADDYSDPFDAK  
**Total Number of Spectra:** 3  
**Number of Replicates (out of 8):** 3  
**Best Match Score:** 110.51  
**Best Match Posterior Error Probability:** 0.00016395  
**Best Match Spectrum:**

**Scan number** 48093      **Raw file** A549-US-WT-top20CID-Elite-2ug-B13  
**Method** ITMS; CID      **Genenames** SHB

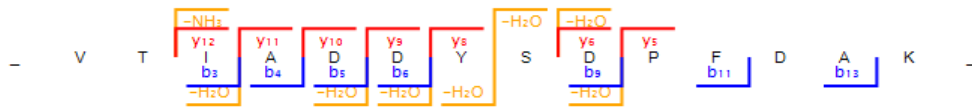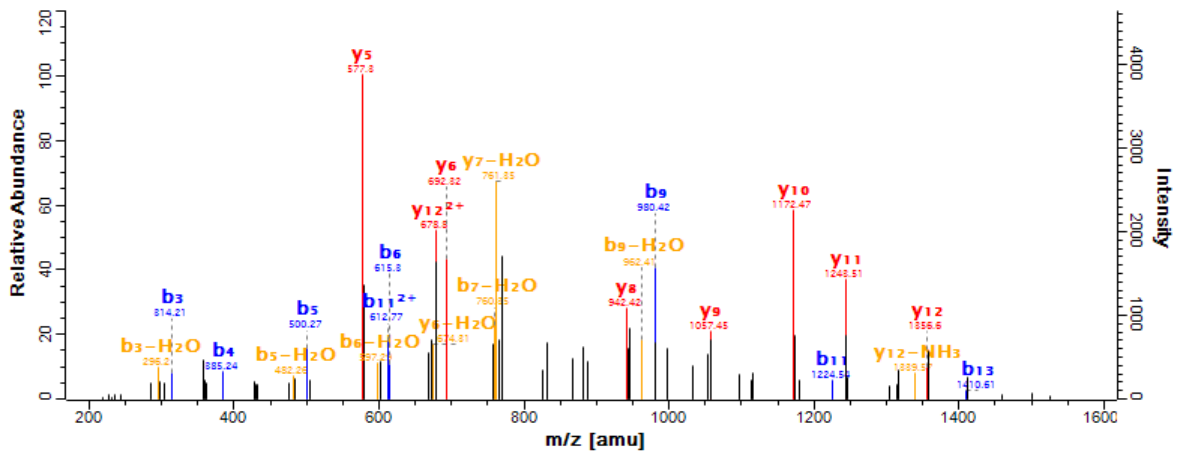

**Protein Group ID:** 3491

**Protein Accession Numbers:** Q15545

**Gene Names:** TAF7

**Peptide Sequence:** LNESDEQHQENQLVMIQK

**Total Number of Spectra:** 4

**Number of Replicates (out of 8):** 4

**Best Match Score:** 77.871

**Best Match Posterior Error Probability:** 0.00013261

**Best Match Spectrum:**

**Scan number** 33871      **Raw file** A549-US-Mock-top20CID-Elite-2ug-B14  
**Method** ITMS; CID      **Genenames** TAF7

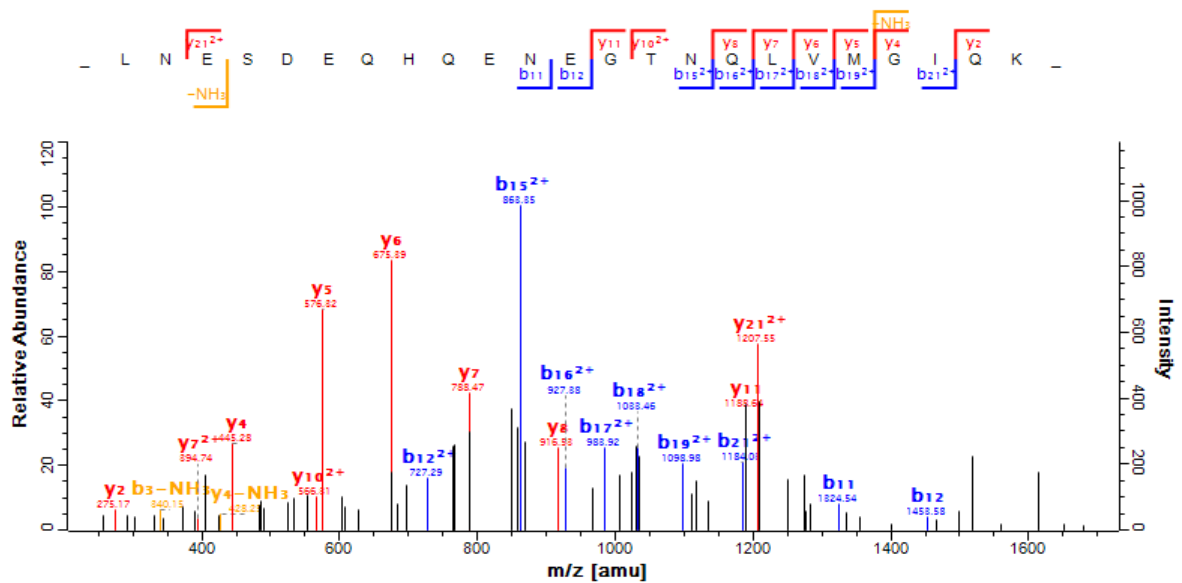

**Protein Group ID:** 3501  
**Protein Accession Numbers:** Q15651  
**Gene Names:** HMGN3  
**Peptide Sequence:** AEEAQKTESVDNEGE  
**Total Number of Spectra:** 7  
**Number of Replicates (out of 8):** 5  
**Best Match Score:** 142.91  
**Best Match Posterior Error Probability:** 3.21E-05  
**Best Match Spectrum:**

**Scan number** 5054      **Raw file** A549-US-WT-top20CID-Elite-2ug-B14  
**Method** ITMS; CID      **Genenames** HMGN3

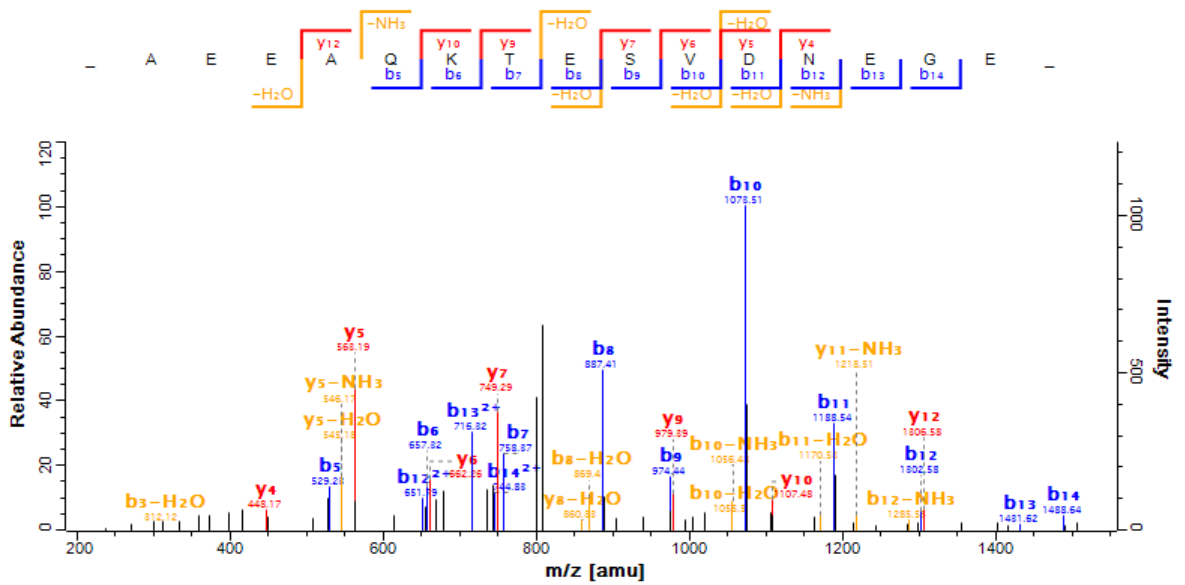

**Protein Group ID:** 3504

**Protein Accession Numbers:** Q15714; Q15714-3; Q15714-2

**Gene Names:** TSC22D1

**Peptide Sequence:** NSQLEQENLLK

**Total Number of Spectra:** 8

**Number of Replicates (out of 8):** 6

**Best Match Score:** 160.38

**Best Match Posterior Error Probability:** 7.73E-08

**Best Match Spectrum:**

|                    |           |                  |                                     |
|--------------------|-----------|------------------|-------------------------------------|
| <b>Scan number</b> | 28760     | <b>Raw file</b>  | A549-US-Mock-top20CID-Elite-2ug-B14 |
| <b>Method</b>      | ITMS; CID | <b>Genenames</b> | TSC22D1                             |

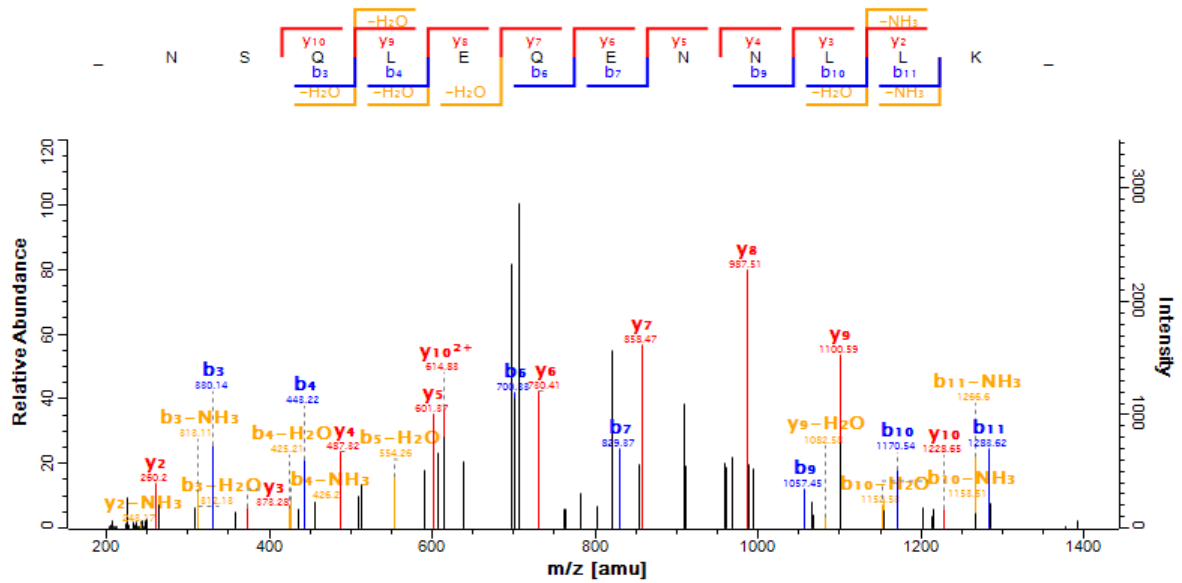

**Protein Group ID:** 3507

**Protein Accession Numbers:** Q15750; Q15750-2

**Gene Names:** TAB1

**Peptide Sequence:** ALEAAHGPGQANQEIAMIDTEFAK

**Total Number of Spectra:** 5

**Number of Replicates (out of 8):** 3

**Best Match Score:** 90.308

**Best Match Posterior Error Probability:** 1.11E-05

**Best Match Spectrum:**

**Scan number** 65991      **Raw file** A549-US-Mock-top20CID-Elite-2ug-B11  
**Method** ITMS; CID      **Genenames** TAB1

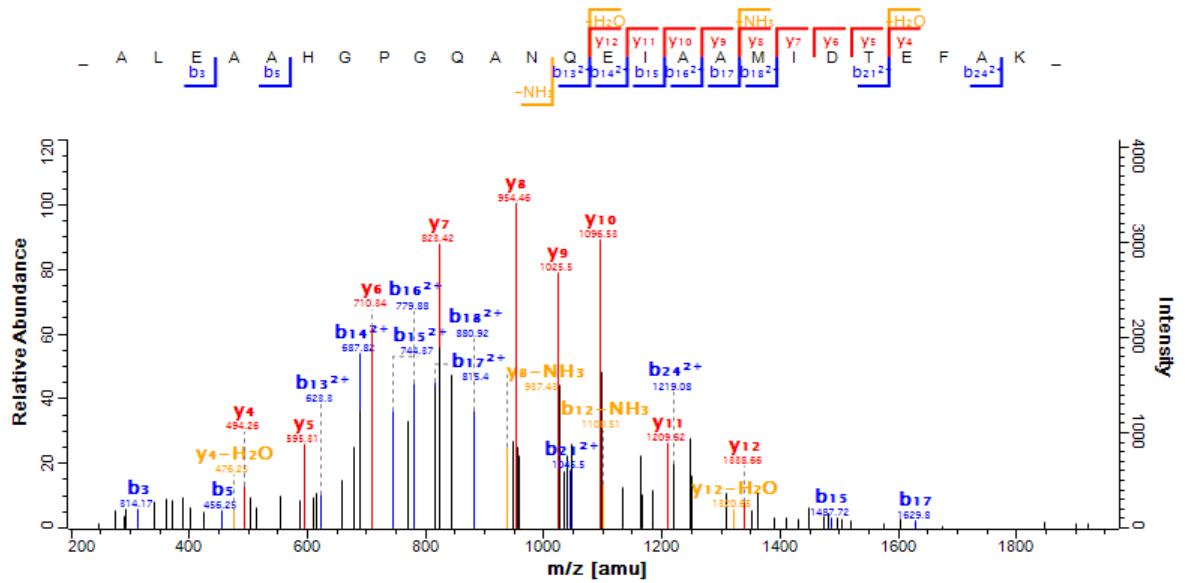

**Protein Group ID:** 3514  
**Protein Accession Numbers:** Q15843  
**Gene Names:** NEDD8  
**Peptide Sequence:** ILGGSVLHLVLALR  
**Total Number of Spectra:** 10  
**Number of Replicates (out of 8):** 6  
**Best Match Score:** 189.3  
**Best Match Posterior Error Probability:** 1.22E-19  
**Best Match Spectrum:**

**Scan number** 84559      **Raw file** A549-US-WT-top20CID-Elite-2ug-B11  
**Method** ITMS; CID      **Genenames** NEDD8

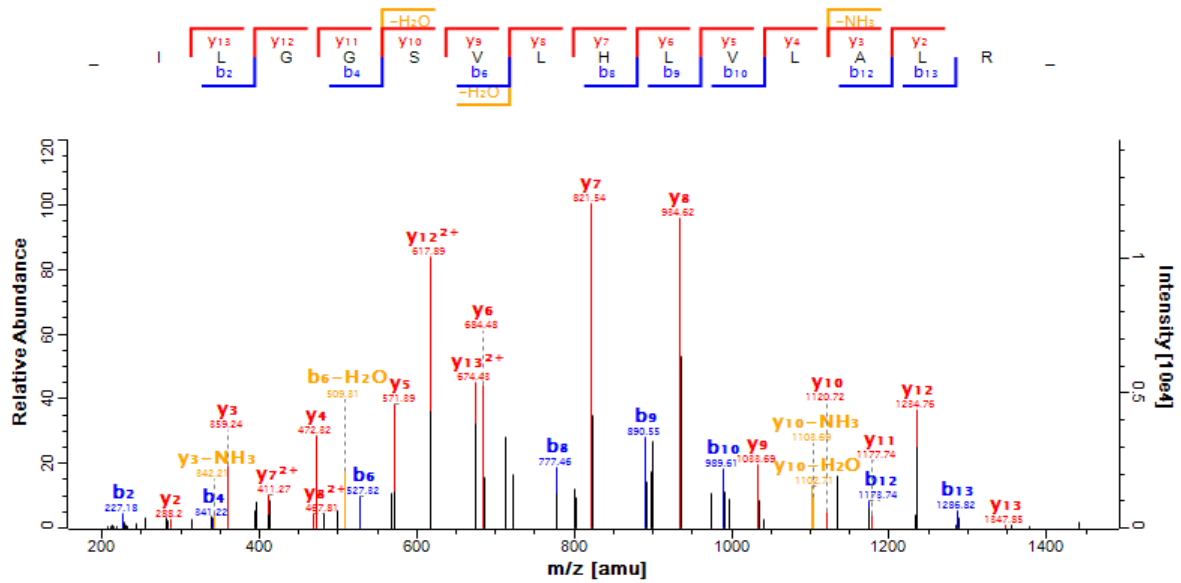



**Protein Group ID:** 3515  
**Protein Accession Numbers:** Q15904  
**Gene Names:** ATP6AP1  
**Peptide Sequence:** GPTISLTQIV  
**Total Number of Spectra:** 3  
**Number of Replicates (out of 8):** 3  
**Best Match Score:** 98.044  
**Best Match Posterior Error Probability:** 0.00094211  
**Best Match Spectrum:**

**Scan number** 64547      **Raw file** A549-US-Mock-top20CID-Elite-2ug-B13  
**Method** ITMS; CID      **Genenames** ATP6AP1

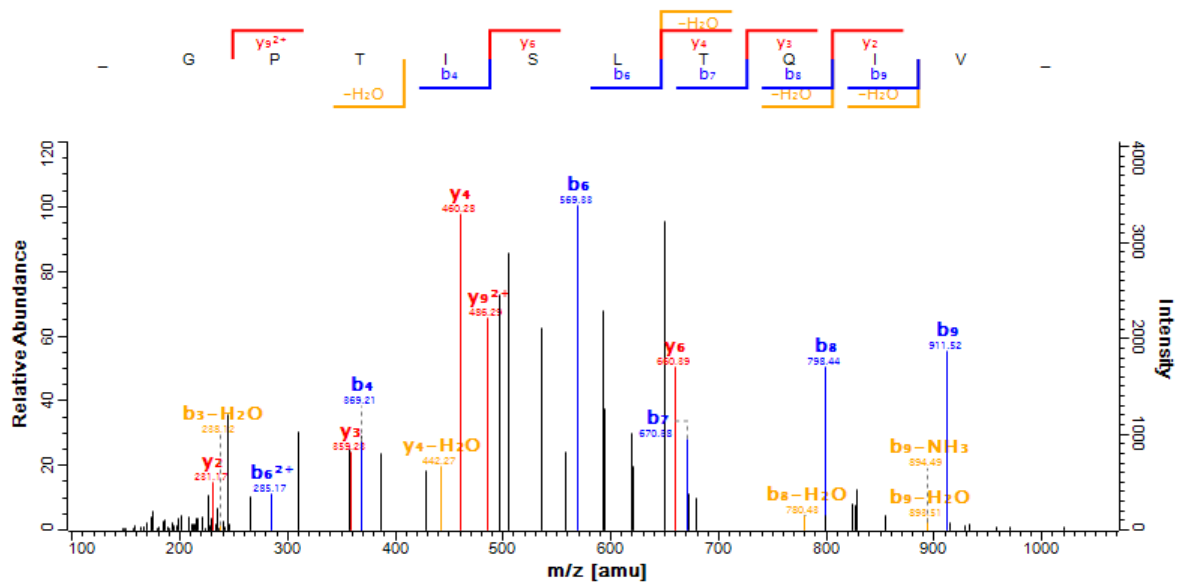

**Protein Group ID:** 3518  
**Protein Accession Numbers:** Q15911; Q15911-2  
**Gene Names:** ZFH3  
**Peptide Sequence:** LAEAPSAQPNQTQEK  
**Total Number of Spectra:** 1  
**Number of Replicates (out of 8):** 1  
**Best Match Score:** 85.006  
**Best Match Posterior Error Probability:** 0.0015016  
**Best Match Spectrum:**

**Scan number** 8720      **Raw file** A549-US-Mock-top20CID-Elite-2ug-B11  
**Method** ITMS; CID      **Genenames** ZFH3

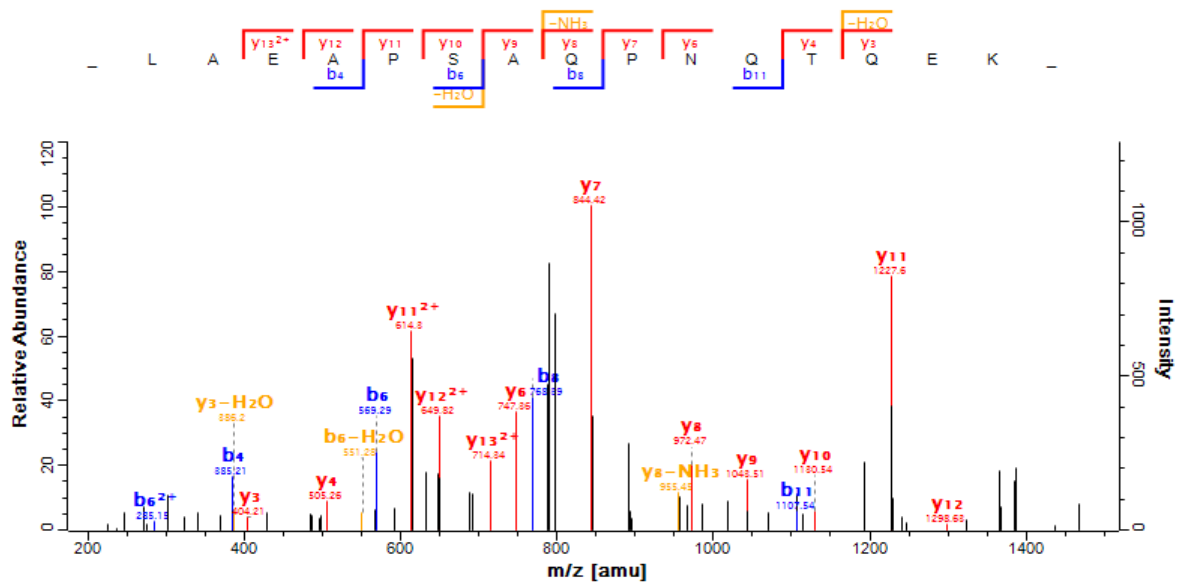

**Protein Group ID:** 3525  
**Protein Accession Numbers:** Q16280  
**Gene Names:** CNGA2  
**Peptide Sequence:** AEIAINVHLSTLK  
**Total Number of Spectra:** 2  
**Number of Replicates (out of 8):** 2  
**Best Match Score:** 84.892  
**Best Match Posterior Error Probability:** 0.0022053  
**Best Match Spectrum:**

**Scan number** 48801      **Raw file** A549-US-WT-top20CID-Elite-2ug-B14  
**Method** ITMS; CID      **Genenames** CNGA2

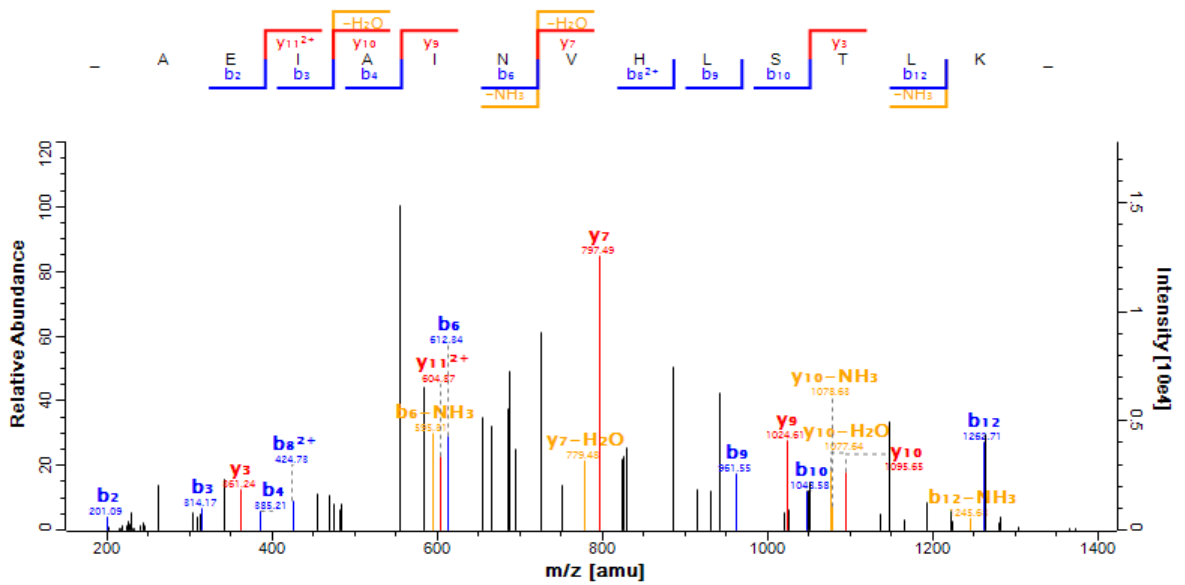

**Protein Group ID:** 3531  
**Protein Accession Numbers:** Q16533  
**Gene Names:** SNAPC1  
**Peptide Sequence:** LDSSSDSASGQGQVK  
**Total Number of Spectra:** 3  
**Number of Replicates (out of 8):** 3  
**Best Match Score:** 107.98  
**Best Match Posterior Error Probability:** 0.00012175  
**Best Match Spectrum:**

**Scan number** 4488      **Raw file** A549-US-WT-top20CID-Elite-2ug-B12  
**Method** ITMS; CID      **Genenames** SNAPC1

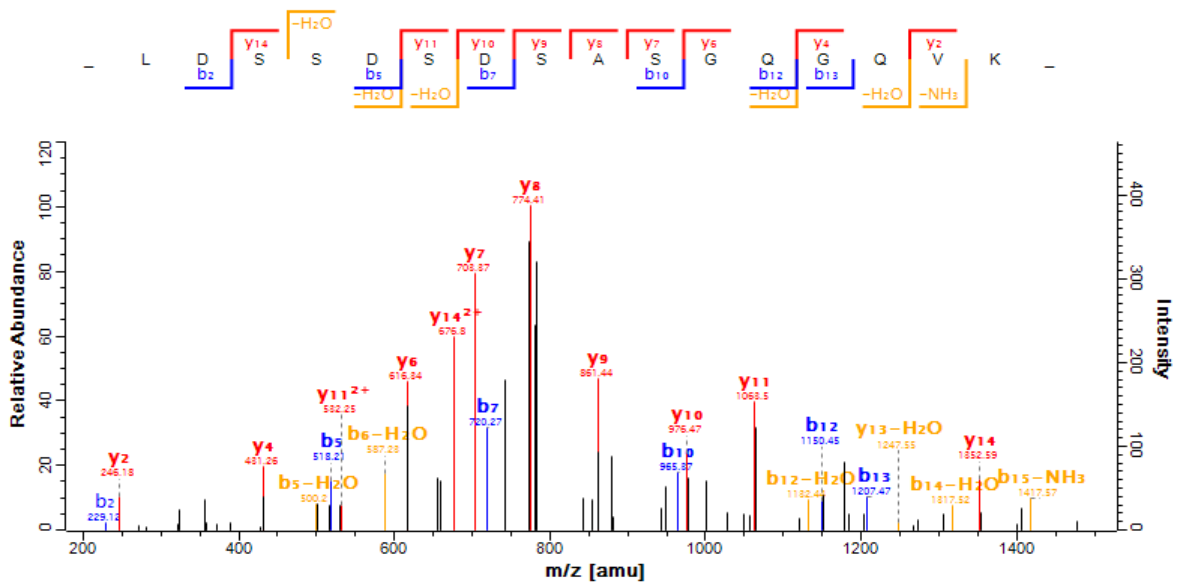

**Protein Group ID:** 3540  
**Protein Accession Numbers:** Q16678  
**Gene Names:** CYP1B1  
**Peptide Sequence:** TVGAGSLVDVMPWLQYFNPVR  
**Total Number of Spectra:** 1  
**Number of Replicates (out of 8):** 1  
**Best Match Score:** 75.564  
**Best Match Posterior Error Probability:** 0.0002151  
**Best Match Spectrum:**

**Scan number** 93865      **Raw file** A549-US-WT-top20CID-Elite-2ug-B13  
**Method** ITMS; CID      **Genenames** CYP1B1

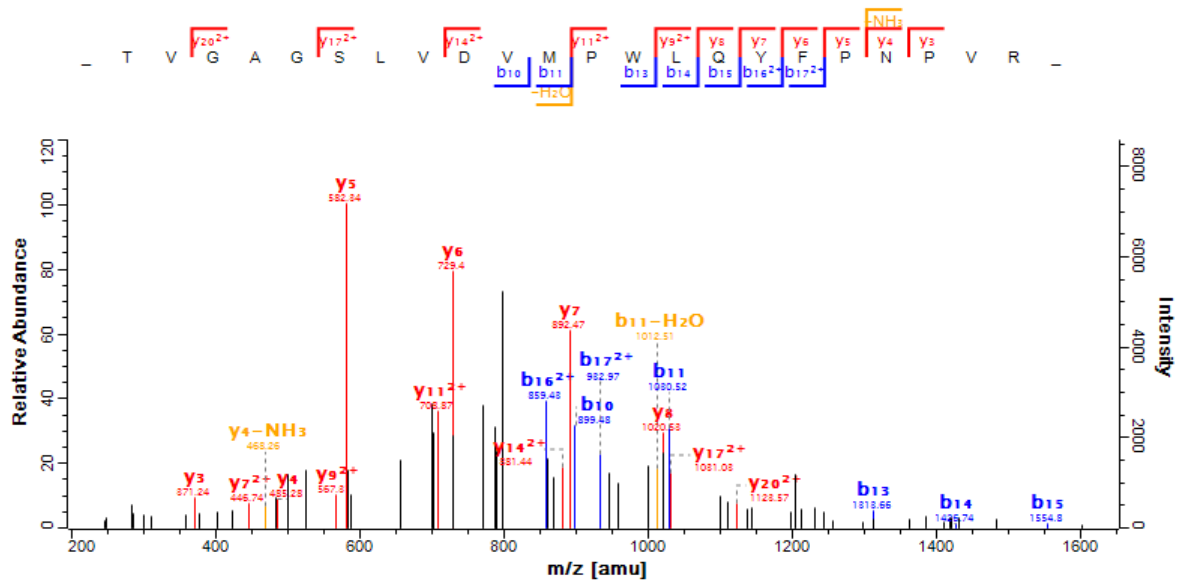

**Protein Group ID:** 3544

**Protein Accession Numbers:** Q16720; Q16720-4; Q16720-2; Q16720-5; Q16720-3;  
Q16720-6; Q16720-7; Q16720-8

**Gene Names:** ATP2B3

**Peptide Sequence:** GEIEQERL D

**Total Number of Spectra:** 2

**Number of Replicates (out of 8):** 2

**Best Match Score:** 174.4

**Best Match Posterior Error Probability:** 2.96E-05

**Best Match Spectrum:**

Scan number 7708 Raw file A549-US-Mock-top20CID-Elite-2ug-B11  
Method ITMS: CID Genenames ATP2B3

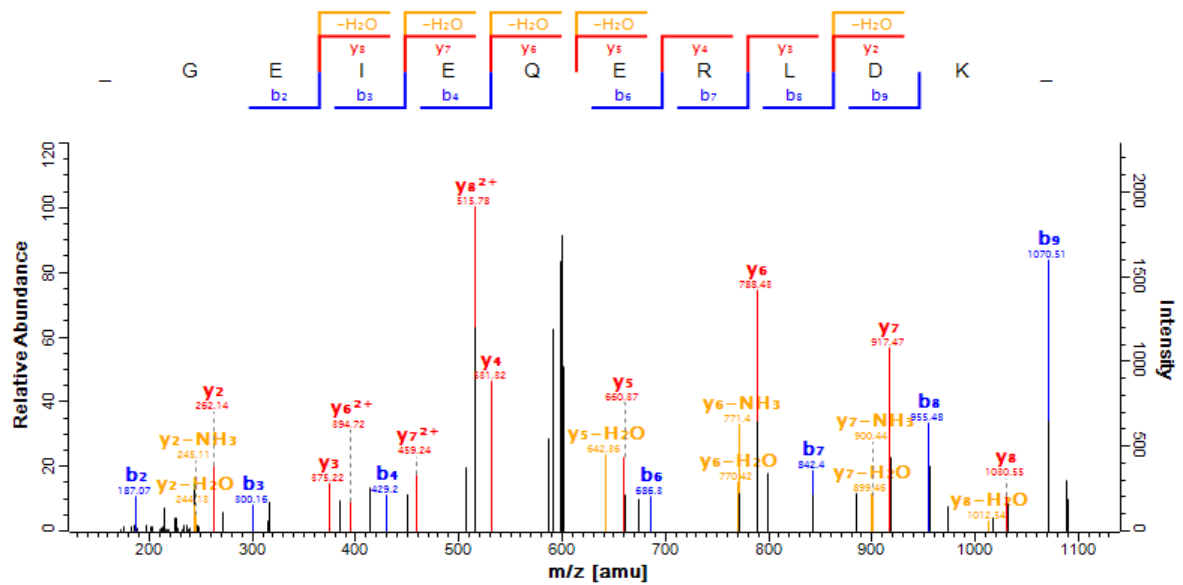

**Protein Group ID:** 3548

**Protein Accession Numbers:** Q6FI13; Q16777

**Gene Names:** HIST2H2AA3; HIST2H2AC

**Peptide Sequence:** VGAGAPVYMAAVLEYLELAGNAAR

**Total Number of Spectra:** 14

**Number of Replicates (out of 8):** 7

**Best Match Score:** 171.39

**Best Match Posterior Error Probability:** 1.05E-41

**Best Match Spectrum:**

|                    |           |                  |                                     |
|--------------------|-----------|------------------|-------------------------------------|
| <b>Scan number</b> | 96235     | <b>Raw file</b>  | A549-US-Mock-top20CID-Elite-2ug-B14 |
| <b>Method</b>      | ITMS; CID | <b>Genenames</b> | HIST2H2AA3; HIST2H2AC               |

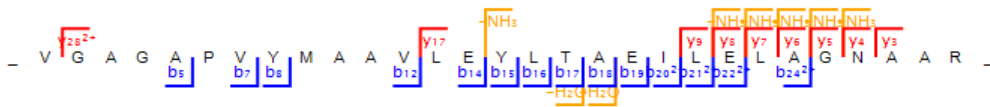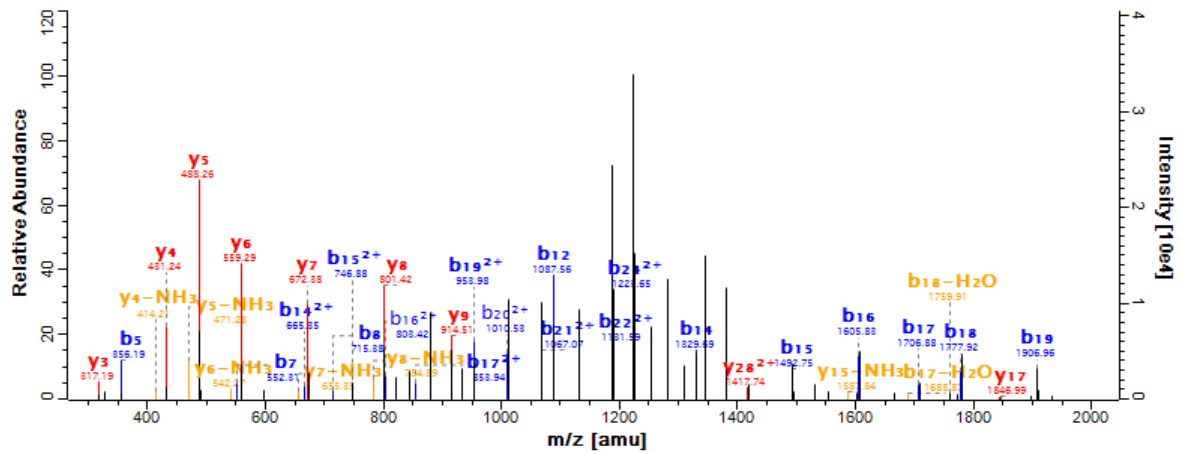

**Protein Group ID:** 3551  
**Protein Accession Numbers:** Q16829; Q16829-2  
**Gene Names:** DUSP7  
**Peptide Sequence:** KCGVLVHCLAGISR  
**Total Number of Spectra:** 1  
**Number of Replicates (out of 8):** 1  
**Best Match Score:** 88.101  
**Best Match Posterior Error Probability:** 0.0032201  
**Best Match Spectrum:**

**Scan number** 16119      **Raw file** A549-US-WT-top20CID-Elite-2ug-B11  
**Method** ITMS; CID      **Genenames** DUSP7

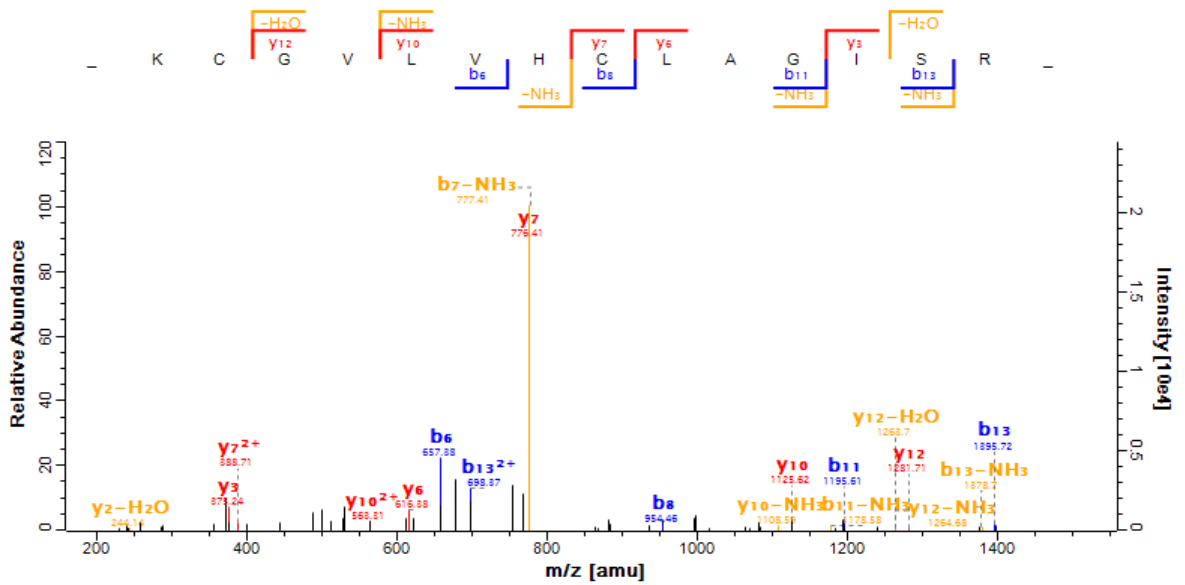



**Protein Group ID:** 3555

**Protein Accession Numbers:** Q16854; Q16854-2

**Gene Names:** DGUOK

**Peptide Sequence:** TYPEWHVATEPVATWQNIQAAGTQK

**Total Number of Spectra:** 11

**Number of Replicates (out of 8):** 8

**Best Match Score:** 118.36

**Best Match Posterior Error Probability:** 7.22E-10

**Best Match Spectrum:**

**Scan number** 62273      **Raw file** A549-US-WT-top20CID-Elite-2ug-B13  
**Method** ITMS; CID      **Genenames** DGUOK

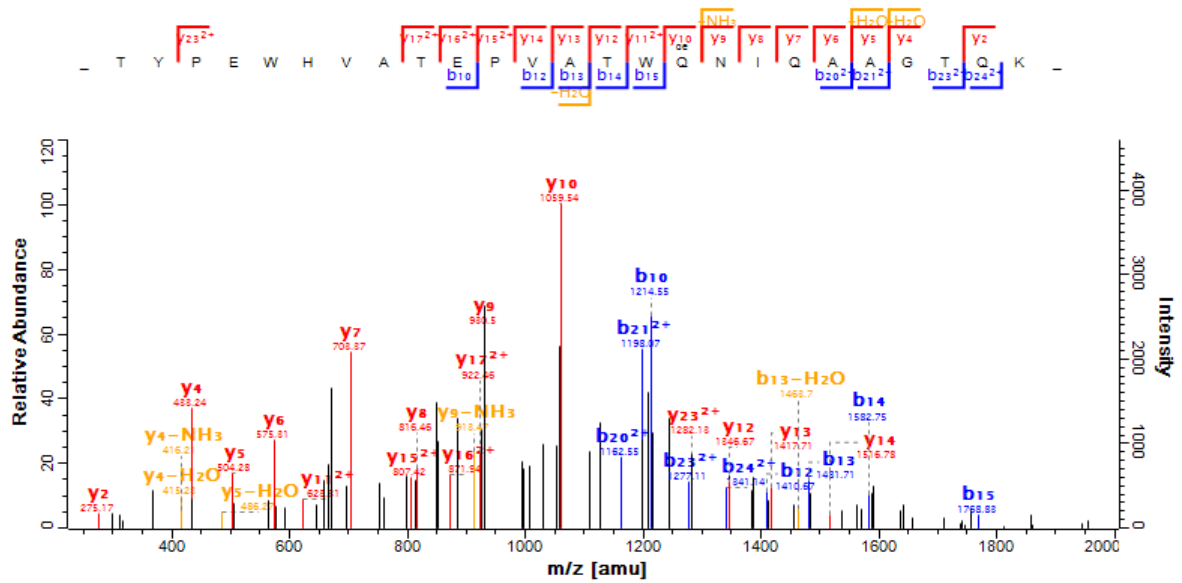

**Protein Group ID:** 3567  
**Protein Accession Numbers:** Q2T9J0; Q2T9J0-2  
**Gene Names:** TYSND1  
**Peptide Sequence:** SPGLVLCHGGIFVPFLR  
**Total Number of Spectra:** 3  
**Number of Replicates (out of 8):** 3  
**Best Match Score:** 112.02  
**Best Match Posterior Error Probability:** 9.94E-05  
**Best Match Spectrum:**

**Scan number** 78609      **Raw file** A549-US-WT-top20CID-Elite-2ug-B14  
**Method** ITMS; CID      **Genenames** TYSND1

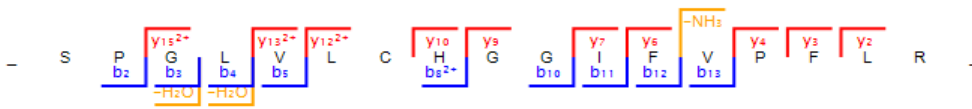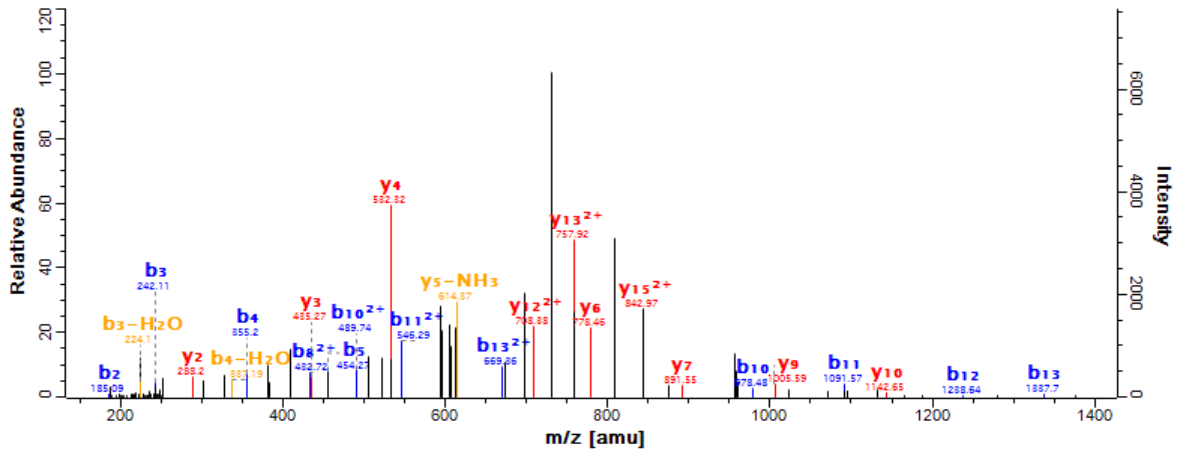

**Protein Group ID:** 3568  
**Protein Accession Numbers:** Q2TAA5  
**Gene Names:** ALG11  
**Peptide Sequence:** LIHPVQFVFLR  
**Total Number of Spectra:** 2  
**Number of Replicates (out of 8):** 2  
**Best Match Score:** 88.495  
**Best Match Posterior Error Probability:** 0.001634  
**Best Match Spectrum:**

**Scan number** 63728      **Raw file** A549-US-WT-top20CID-Elite-2ug-B12  
**Method** ITMS; CID      **Genenames** ALG11

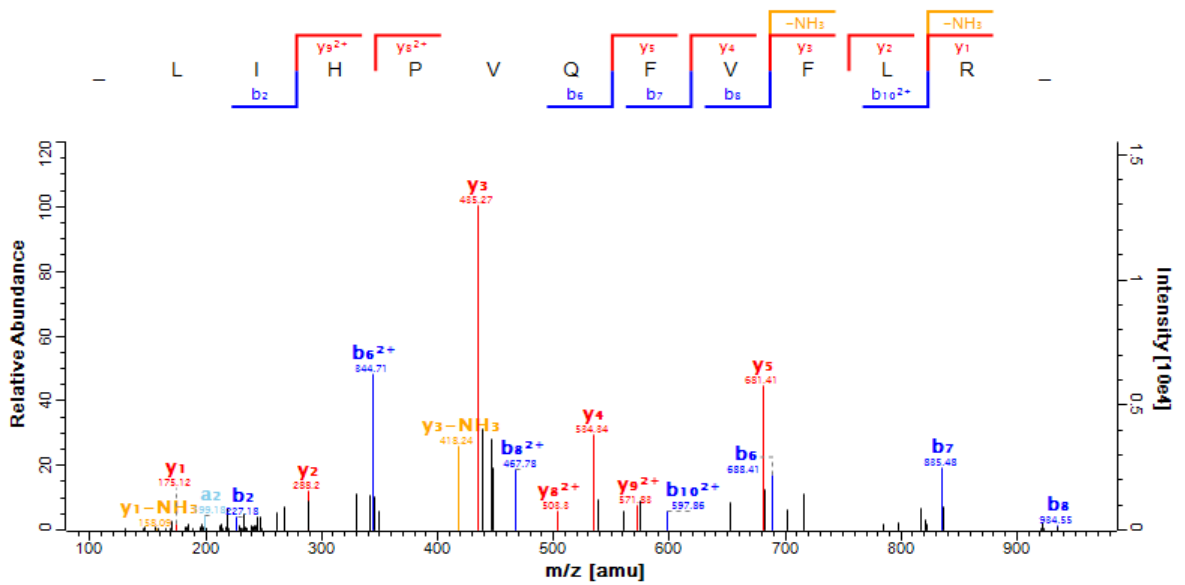

**Protein Group ID:** 3573  
**Protein Accession Numbers:** Q32NC0  
**Gene Names:** C18orf21  
**Peptide Sequence:** MLLSQNESQK  
**Total Number of Spectra:** 1  
**Number of Replicates (out of 8):** 1  
**Best Match Score:** 89.171  
**Best Match Posterior Error Probability:** 0.0020853  
**Best Match Spectrum:**

|                    |           |                  |                                   |
|--------------------|-----------|------------------|-----------------------------------|
| <b>Scan number</b> | 14054     | <b>Raw file</b>  | A549-US-WT-top20CID-Elite-2ug-B12 |
| <b>Method</b>      | ITMS; CID | <b>Genenames</b> | C18orf21                          |

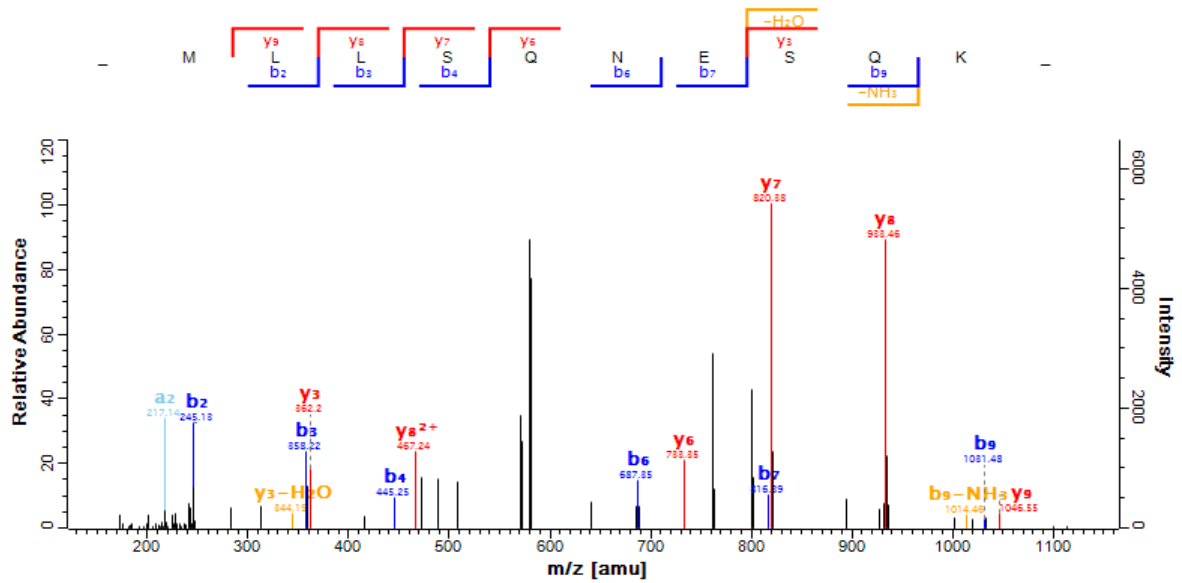

**Protein Group ID:** 3579  
**Protein Accession Numbers:** Q3SY69  
**Gene Names:** ALDH1L2  
**Peptide Sequence:** GVINIIPGSGGIAGQR  
**Total Number of Spectra:** 4  
**Number of Replicates (out of 8):** 4  
**Best Match Score:** 80.534  
**Best Match Posterior Error Probability:** 0.0019411  
**Best Match Spectrum:**

**Scan number** 51769      **Raw file** A549-US-WT-top20CID-Elite-2ug-B14  
**Method** ITMS; CID      **Genenames** ALDH1L2

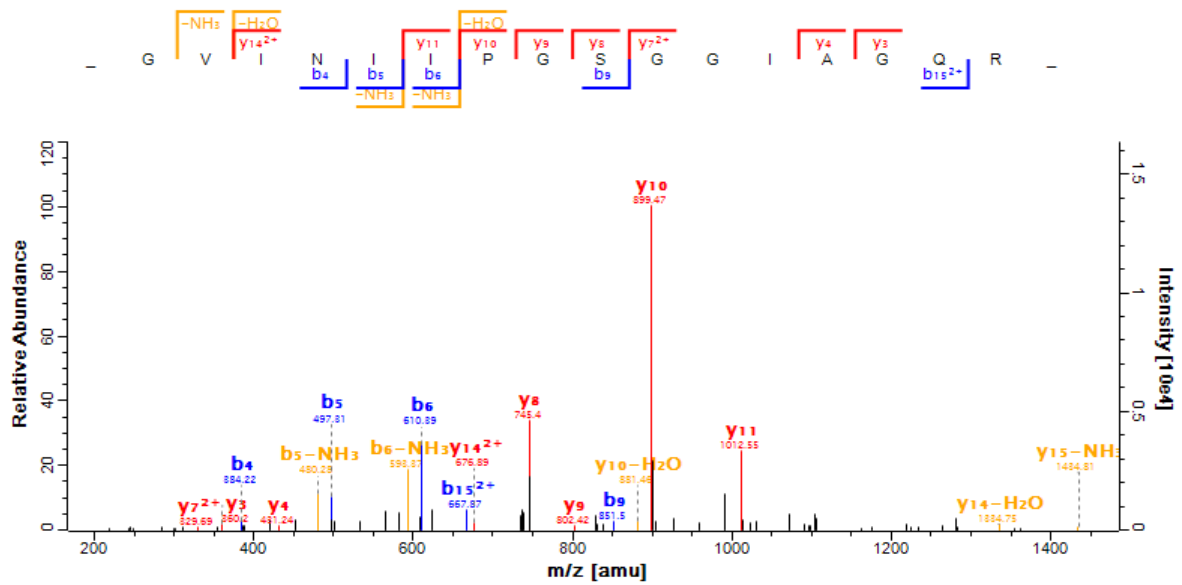

**Protein Group ID:** 3587  
**Protein Accession Numbers:** Q4G0I0  
**Gene Names:** CCSMST1  
**Peptide Sequence:** DRAHPAAEEEDDPDRPIEFSSSK  
**Total Number of Spectra:** 1  
**Number of Replicates (out of 8):** 1  
**Best Match Score:** 86.357  
**Best Match Posterior Error Probability:** 0.0005932  
**Best Match Spectrum:**

**Scan number** 22218      **Raw file** A549-US-Mock-top20CID-Elite-2ug-B11  
**Method** ITMS; CID      **Genenames** CCSMST1

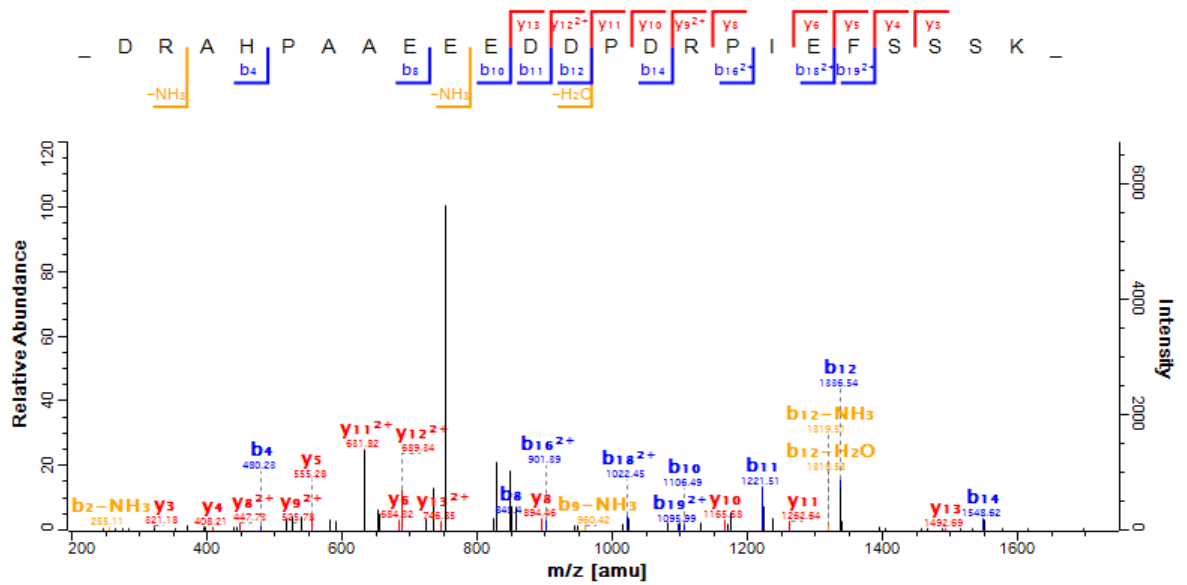

**Protein Group ID:** 3596  
**Protein Accession Numbers:** Q4V9L6  
**Gene Names:** TMEM119  
**Peptide Sequence:** QLQADILAATQNLK  
**Total Number of Spectra:** 1  
**Number of Replicates (out of 8):** 1  
**Best Match Score:** 116.19  
**Best Match Posterior Error Probability:** 0.009967  
**Best Match Spectrum:**

**Scan number** 88035      **Raw file** A549-US-Mock-top20CID-Elite-2ug-B14  
**Method** ITMS; CID      **Genenames** TMEM119

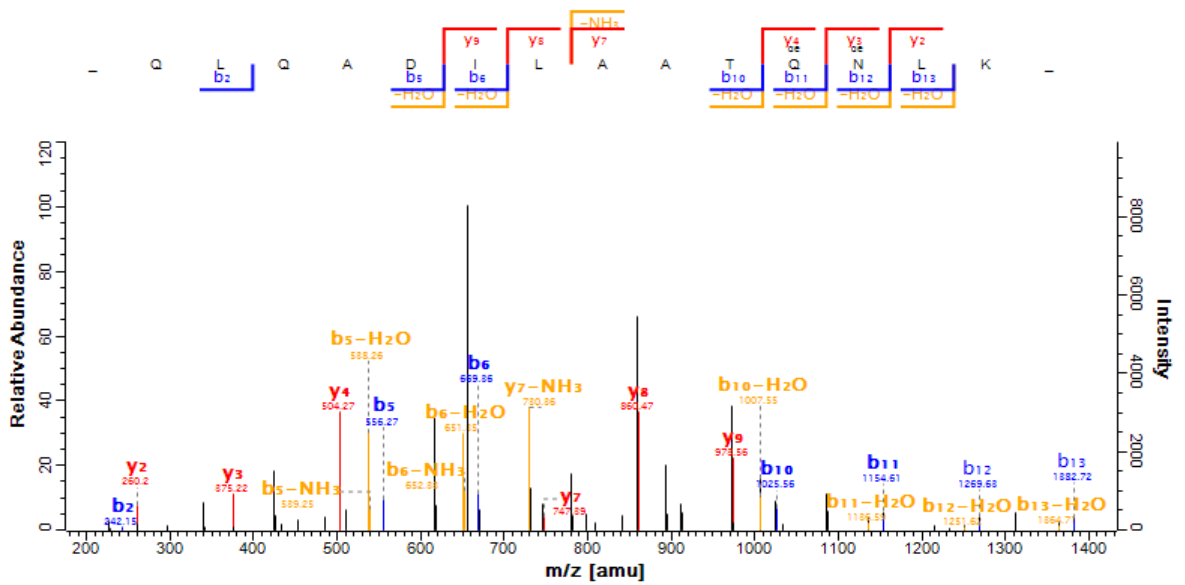

**Protein Group ID:** 3608  
**Protein Accession Numbers:** Q53LP3  
**Gene Names:** SOWAHC  
**Peptide Sequence:** IQVTAEPEAPDGPAGPEAR  
**Total Number of Spectra:** 7  
**Number of Replicates (out of 8):** 4  
**Best Match Score:** 116.6  
**Best Match Posterior Error Probability:** 2.22E-05  
**Best Match Spectrum:**

**Scan number** 29832      **Raw file** A549-US-WT-top20CID-Elite-2ug-B14  
**Method** ITMS; CID      **Genenames** SOWAHC

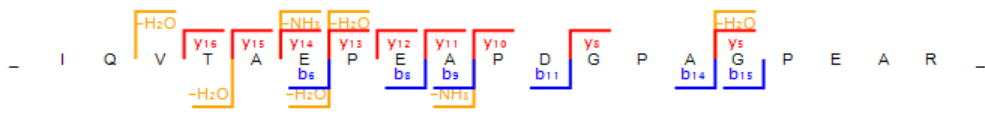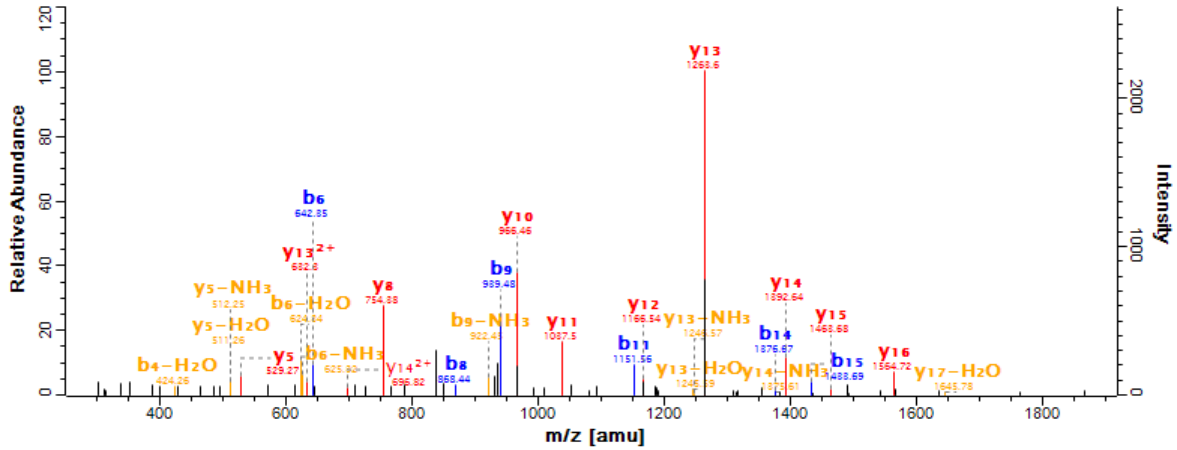



**Protein Group ID:** 3612  
**Protein Accession Numbers:** Q562R1  
**Gene Names:** ACTBL2  
**Peptide Sequence:** VAPDEHPILTLTETAPLNPK  
**Total Number of Spectra:** 4  
**Number of Replicates (out of 8):** 3  
**Best Match Score:** 93.51  
**Best Match Posterior Error Probability:** 0.00029775  
**Best Match Spectrum:**

**Scan number** 44473      **Raw file** A549-US-Mock-top20CID-Elite-2ug-B12  
**Method** ITMS; CID      **Genenames** ACTBL2

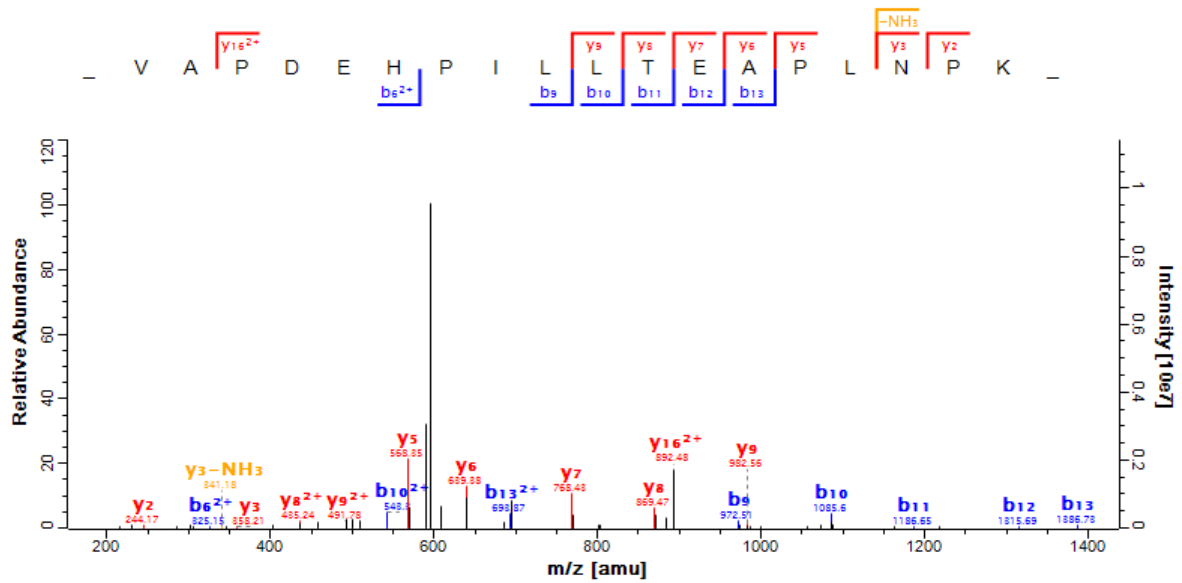

**Protein Group ID:** 3613  
**Protein Accession Numbers:** Q56P03  
**Gene Names:** EAPP  
**Peptide Sequence:** DEVFHFFNVLASHS  
**Total Number of Spectra:** 2  
**Number of Replicates (out of 8):** 2  
**Best Match Score:** 101.6  
**Best Match Posterior Error Probability:** 0.00030903  
**Best Match Spectrum:**

**Scan number** 75027      **Raw file** A549-US-Mock-top20CID-Elite-2ug-B11  
**Method** ITMS; CID      **Genenames** EAPP

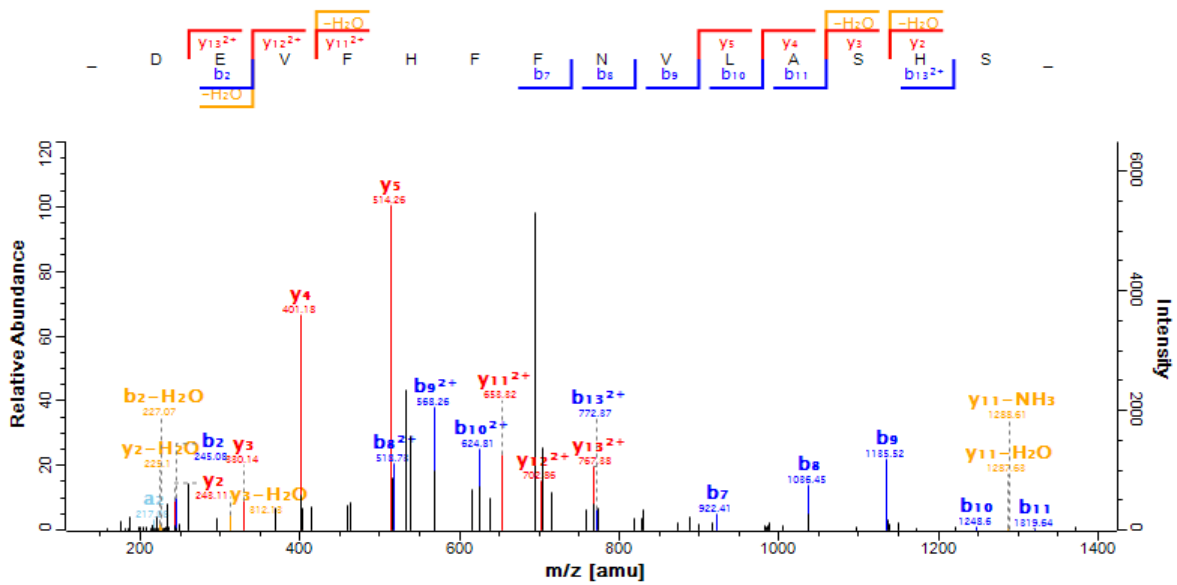

**Protein Group ID:** 3615  
**Protein Accession Numbers:** Q587I9  
**Gene Names:** SFT2D3  
**Peptide Sequence:** AGGPAAAEPLLAELLAELAEK  
**Total Number of Spectra:** 1  
**Number of Replicates (out of 8):** 1  
**Best Match Score:** 95.264  
**Best Match Posterior Error Probability:** 0.00045926  
**Best Match Spectrum:**

**Scan number** 34862      **Raw file** A549-US-WT-top20CID-Elite-2ug-B13  
**Method** ITMS; CID      **Genenames** SFT2D3

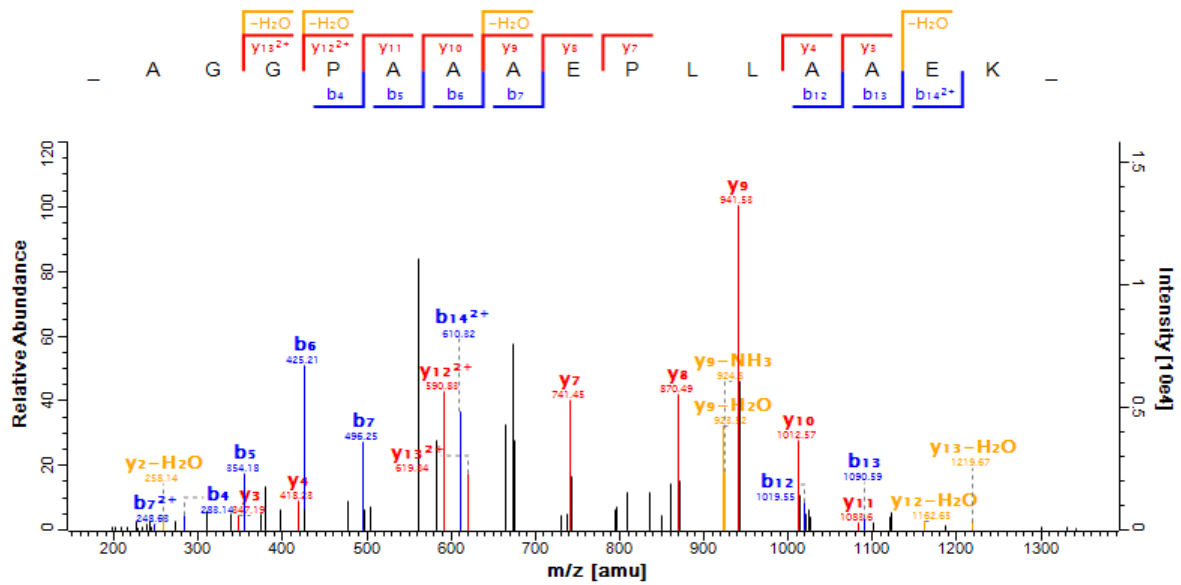

**Protein Group ID:** 3616  
**Protein Accession Numbers:** Q58FF6  
**Gene Names:** HSP90AB4P  
**Peptide Sequence:** SLINTFYSNK  
**Total Number of Spectra:** 16  
**Number of Replicates (out of 8):** 8  
**Best Match Score:** 234.3  
**Best Match Posterior Error Probability:** 1.18E-40  
**Best Match Spectrum:**

**Scan number** 49181      **Raw file** A549-US-Mock-top20CID-Elite-2ug-B11  
**Method** ITMS; CID      **Genenames** HSP90AB4P

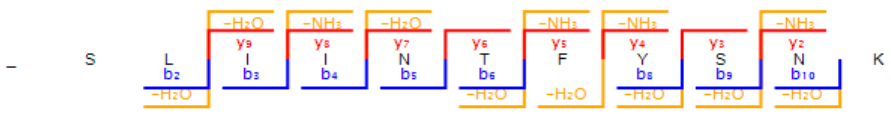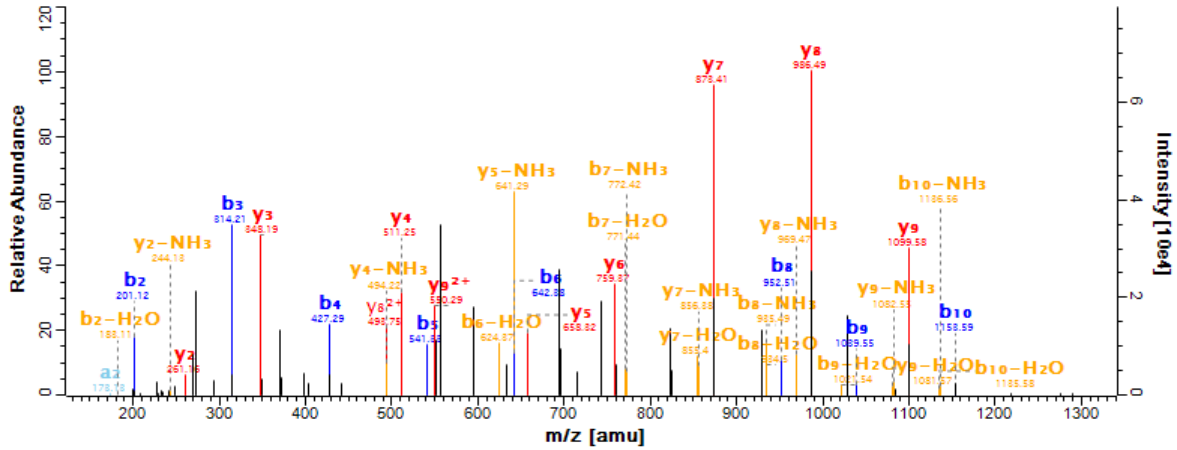

**Protein Group ID:** 3617  
**Protein Accession Numbers:** Q58FF8  
**Gene Names:** HSP90AB2P  
**Peptide Sequence:** HSQFLGYPITLYLEK  
**Total Number of Spectra:** 19  
**Number of Replicates (out of 8):** 8  
**Best Match Score:** 216.71  
**Best Match Posterior Error Probability:** 2.63E-48  
**Best Match Spectrum:**

**Scan number** 67895      **Raw file** A549-US-WT-top20CID-Elite-2ug-B12  
**Method** ITMS; CID      **Genenames** HSP90AB2P

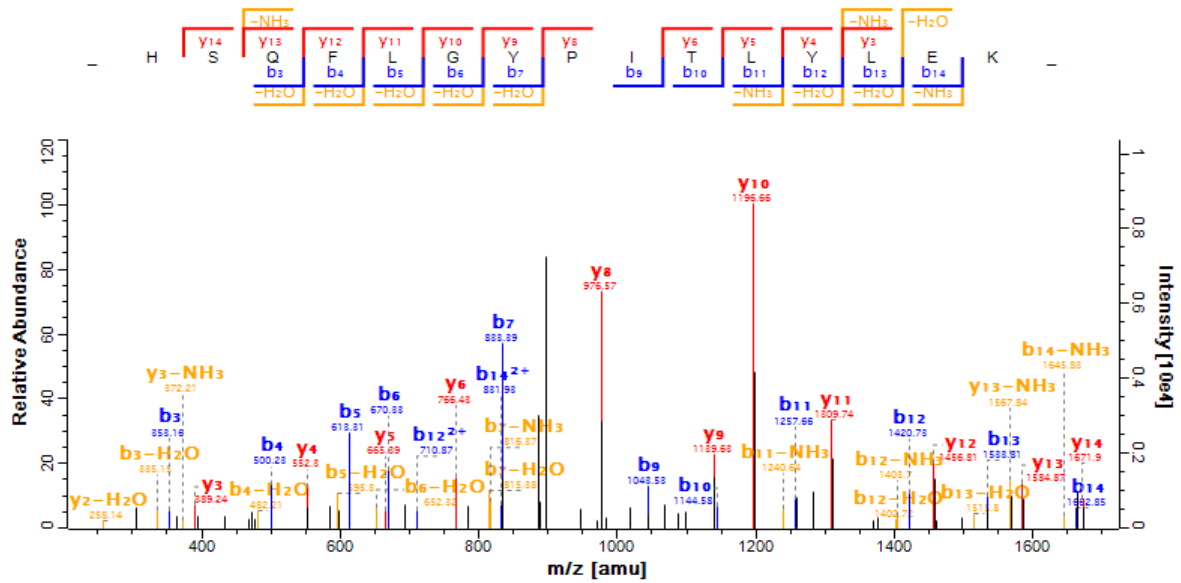

**Protein Group ID:** 3619  
**Protein Accession Numbers:** Q5C9Z4  
**Gene Names:** NOM1  
**Peptide Sequence:** ASGAGSEFQDQTR  
**Total Number of Spectra:** 8  
**Number of Replicates (out of 8):** 5  
**Best Match Score:** 121.56  
**Best Match Posterior Error Probability:** 0.00011536  
**Best Match Spectrum:**

**Scan number** 9504      **Raw file** A549-US-Mock-top20CID-Elite-2ug-B13  
**Method** ITMS; CID      **Genenames** NOM1

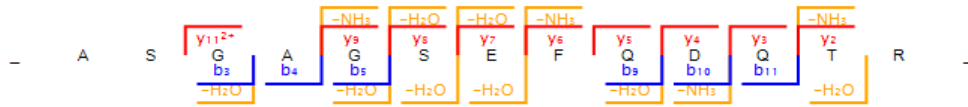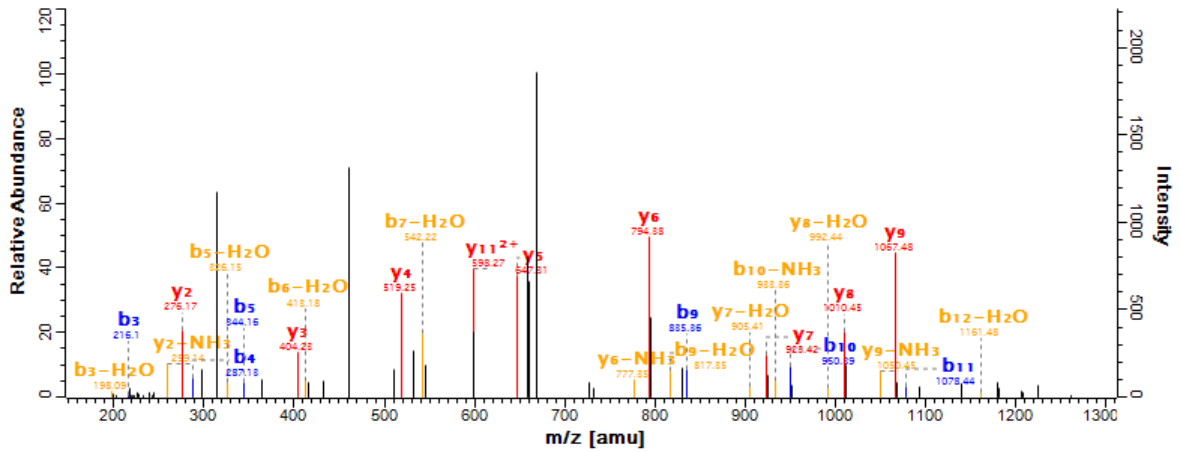

**Protein Group ID:** 3624

**Protein Accession Numbers:** Q8N8Z6; Q5H993

**Gene Names:** DCBLD1

**Peptide Sequence:** HSLSSGGFSPVAGVGAQDGDYQRPHSAQPADR

**Total Number of Spectra:** 1

**Number of Replicates (out of 8):** 1

**Best Match Score:** 66.282

**Best Match Posterior Error Probability:** 9.35E-05

**Best Match Spectrum:**

**Scan number** 31162      **Raw file** A549-US-Mock-top20CID-Elite-2ug-B12  
**Method** ITMS; CID      **Genenames** DCBLD1

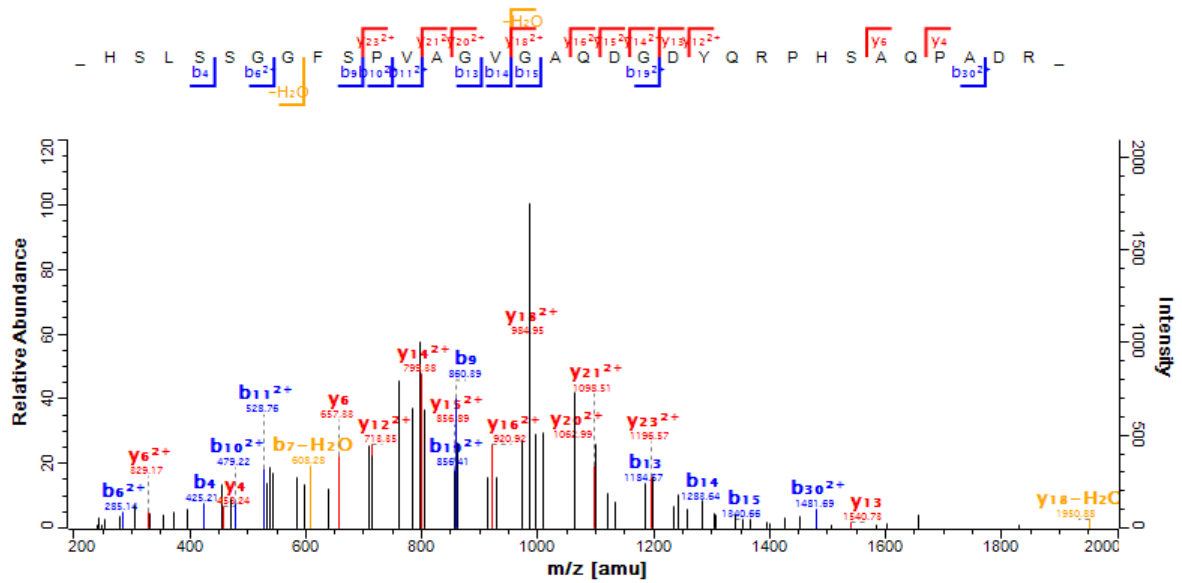

**Protein Group ID:** 3625

**Protein Accession Numbers:** Q5H9L2; Q6IPX3; Q969E4; Q6IPX3-2

**Gene Names:** TCEAL5;TCEAL6;TCEAL3

**Peptide Sequence:** DSQEDLQER

**Total Number of Spectra:** 2

**Number of Replicates (out of 8):** 2

**Best Match Score:** 93.096

**Best Match Posterior Error Probability:** 0.003006

**Best Match Spectrum:**

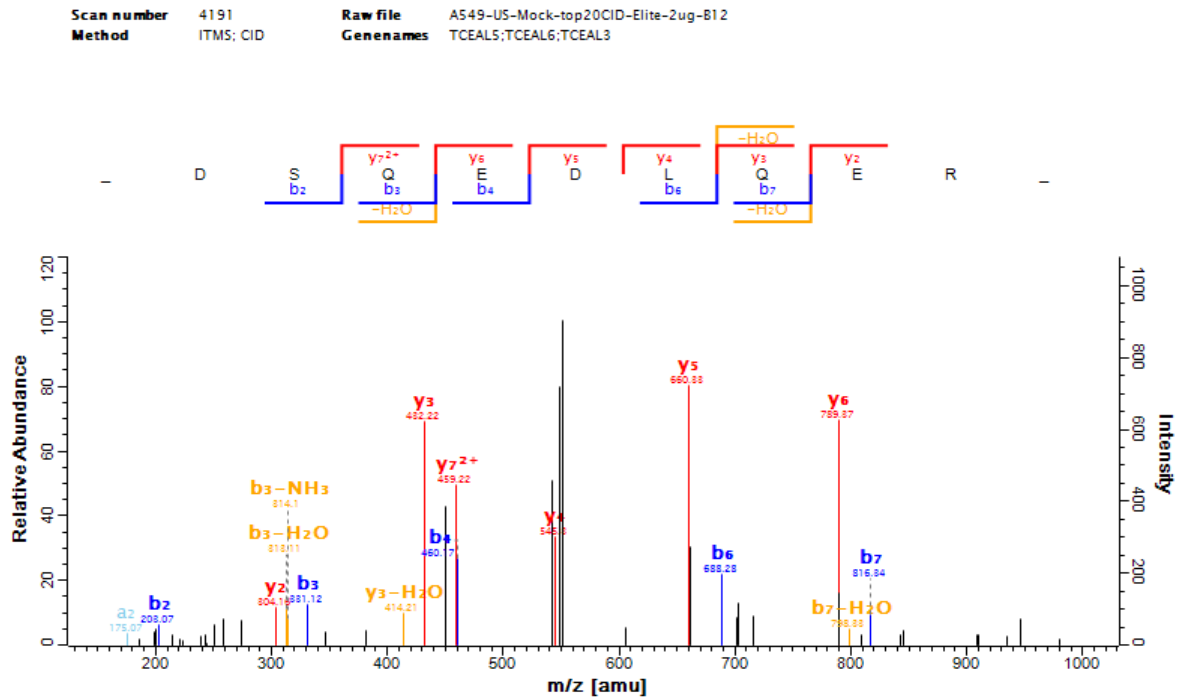



**Protein Group ID:** 3627

**Protein Accession Numbers:** Q5HYI7; Q5HYI7-4; Q5HYI7-2

**Gene Names:** MTX3

**Peptide Sequence:** GDVPILTTEDDMVSQPAK

**Total Number of Spectra:** 2

**Number of Replicates (out of 8):** 2

**Best Match Score:** 136.66

**Best Match Posterior Error Probability:** 2.47E-05

**Best Match Spectrum:**

**Scan number** 48209      **Raw file** A549-US-Mock-top20CID-Elite-2ug-B12  
**Method** ITMS; CID      **Genenames** MTX3

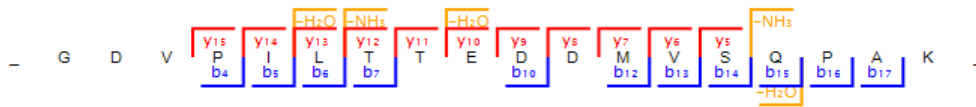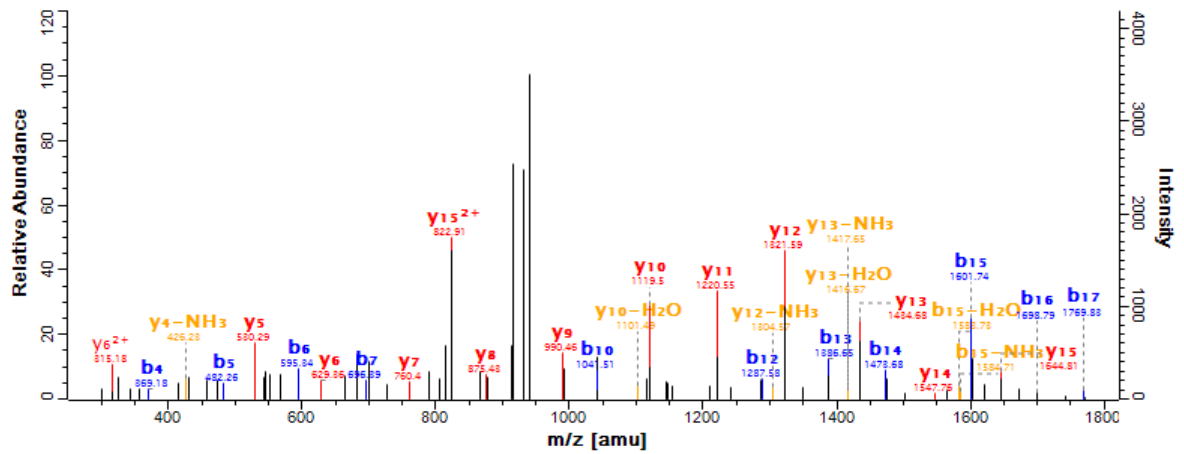

**Protein Group ID:** 3628

**Protein Accession Numbers:** Q5HYK7; Q5HYK7-2; Q5HYK7-3

**Gene Names:** SH3D19

**Peptide Sequence:** VFEGQTNIETSLGPK

**Total Number of Spectra:** 1

**Number of Replicates (out of 8):** 1

**Best Match Score:** 92.773

**Best Match Posterior Error Probability:** 0.00062991

**Best Match Spectrum:**

|                    |           |                  |                                     |
|--------------------|-----------|------------------|-------------------------------------|
| <b>Scan number</b> | 36852     | <b>Raw file</b>  | A549-US-Mock-top20CID-Elite-2ug-B13 |
| <b>Method</b>      | ITMS; CID | <b>Genenames</b> | SH3D19                              |

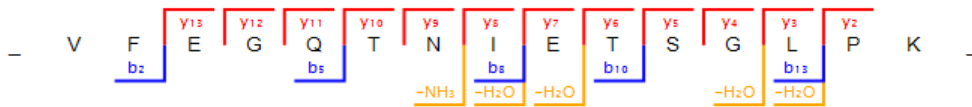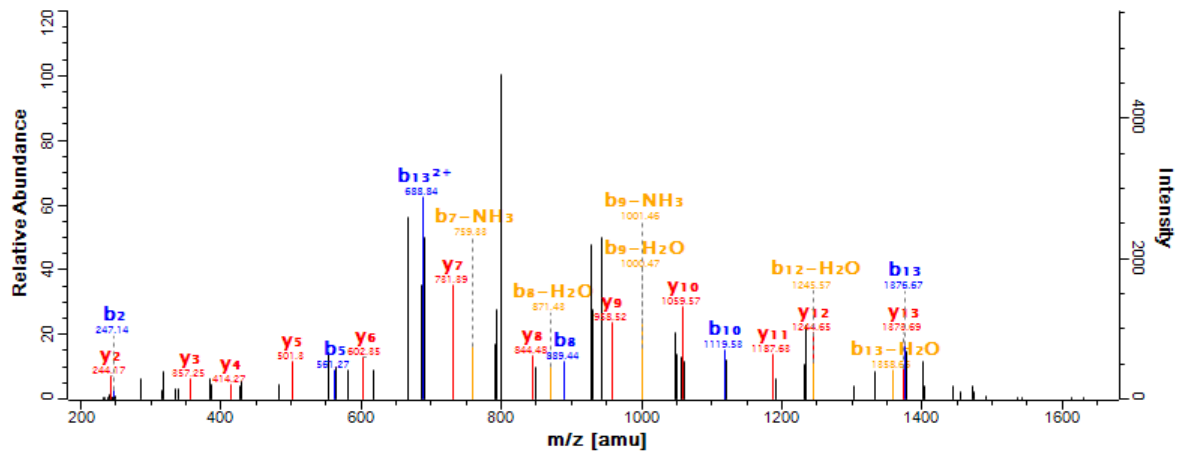

**Protein Group ID:** 3631  
**Protein Accession Numbers:** Q9BVM2; Q5JQQ4  
**Gene Names:** DPCD;RP11-529I10.4  
**Peptide Sequence:** AVTGWLESLR  
**Total Number of Spectra:** 7  
**Number of Replicates (out of 8):** 7  
**Best Match Score:** 175.15  
**Best Match Posterior Error Probability:** 8.00E-06  
**Best Match Spectrum:**

**Scan number** 84256      **Raw file** A549-US-WT-top20CID-Elite-2ug-B12  
**Method** ITMS; CID      **Genenames** DPCD;RP11-529I10.4

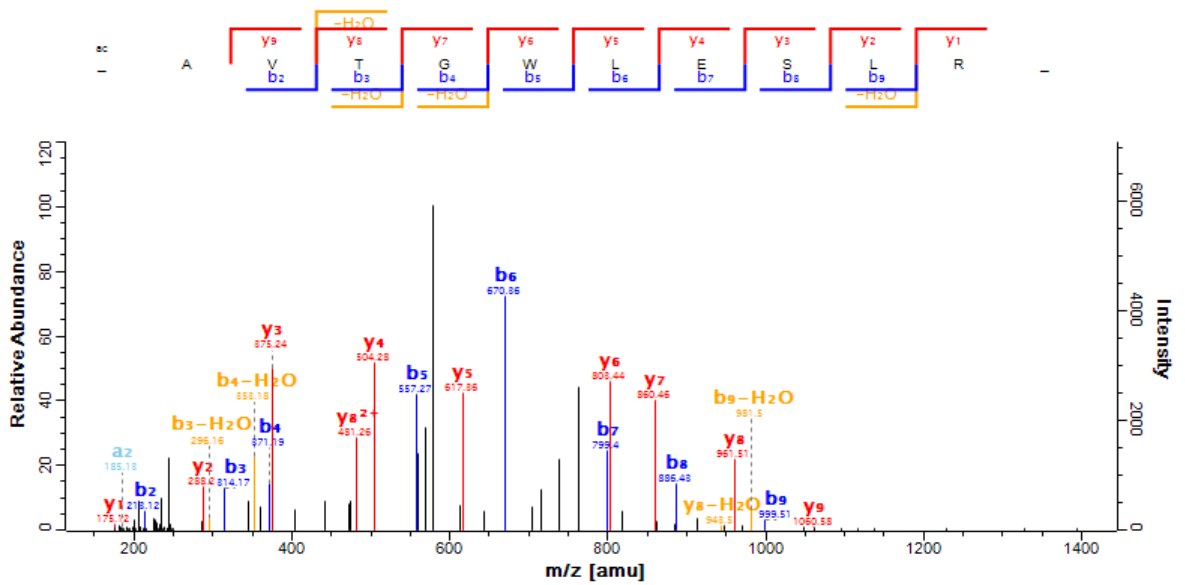

**Protein Group ID:** 3637  
**Protein Accession Numbers:** Q9UKD1; Q5JTV1  
**Gene Names:** GMEB2  
**Peptide Sequence:** DAGLLDEVIQEFHQELVETMR  
**Total Number of Spectra:** 5  
**Number of Replicates (out of 8):** 4  
**Best Match Score:** 110.74  
**Best Match Posterior Error Probability:** 3.42E-06  
**Best Match Spectrum:**

**Scan number** 93122      **Raw file** A549-US-Mock-top20CID-Elite-2ug-B11  
**Method** ITMS; CID      **Genenames** GMEB2

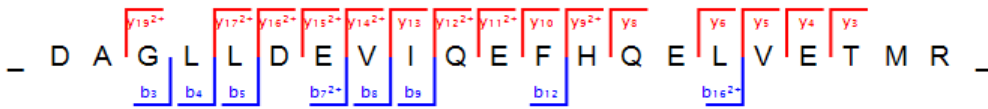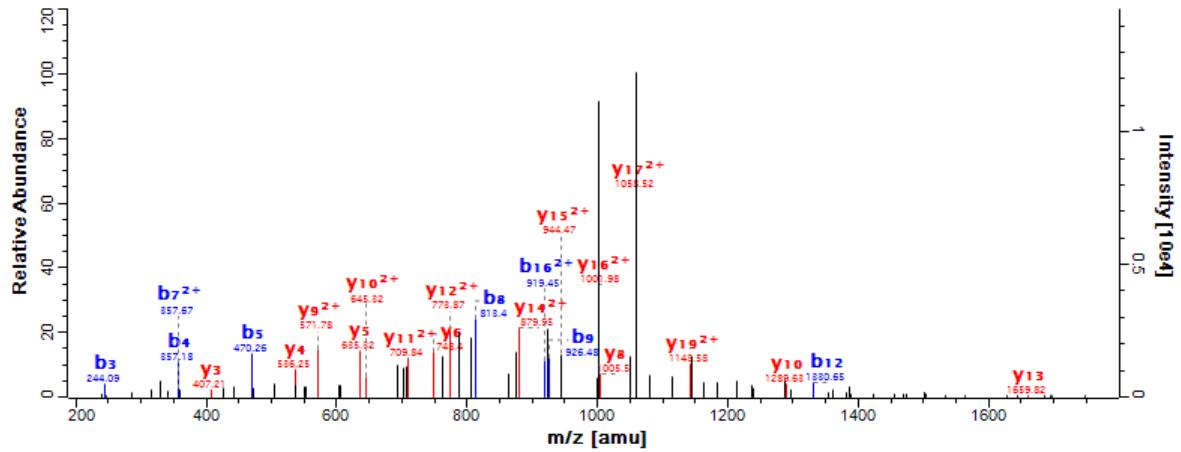

**Protein Group ID:** 3646

**Protein Accession Numbers:** Q5MIZ7; Q5MIZ7-2; Q5MIZ7-3

**Gene Names:** SMEK2

**Peptide Sequence:** LGILPALEIVMGMGMDDDLQVR

**Total Number of Spectra:** 9

**Number of Replicates (out of 8):** 8

**Best Match Score:** 206.43

**Best Match Posterior Error Probability:** 1.90E-42

**Best Match Spectrum:**

**Scan number** 94767      **Raw file** A549-US-Mock-top20CID-Elite-2ug-B14  
**Method** ITMS; CID      **Genenames** SMEK2

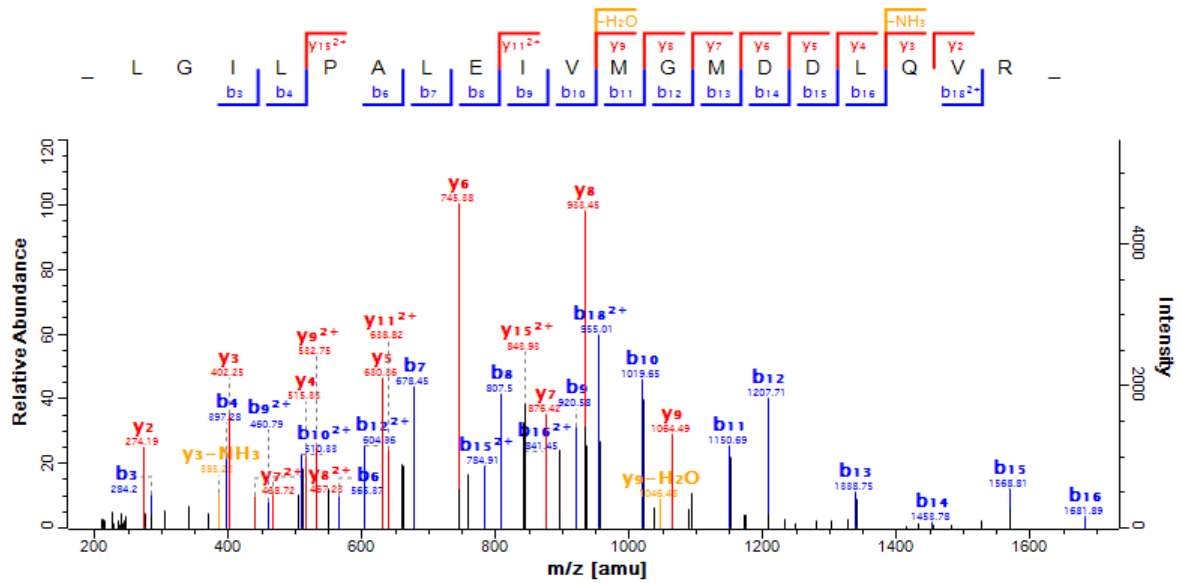

**Protein Group ID:** 3647  
**Protein Accession Numbers:** Q5MY95; Q5MY95-2  
**Gene Names:** ENTPD8  
**Peptide Sequence:** LLVGLVQSR  
**Total Number of Spectra:** 2  
**Number of Replicates (out of 8):** 2  
**Best Match Score:** 90.657  
**Best Match Posterior Error Probability:** 0.0034895  
**Best Match Spectrum:**

**Scan number** 36733      **Raw file** A549-US-Mock-top20CID-Elite-2ug-B11  
**Method** ITMS; CID      **Genenames** ENTPD8

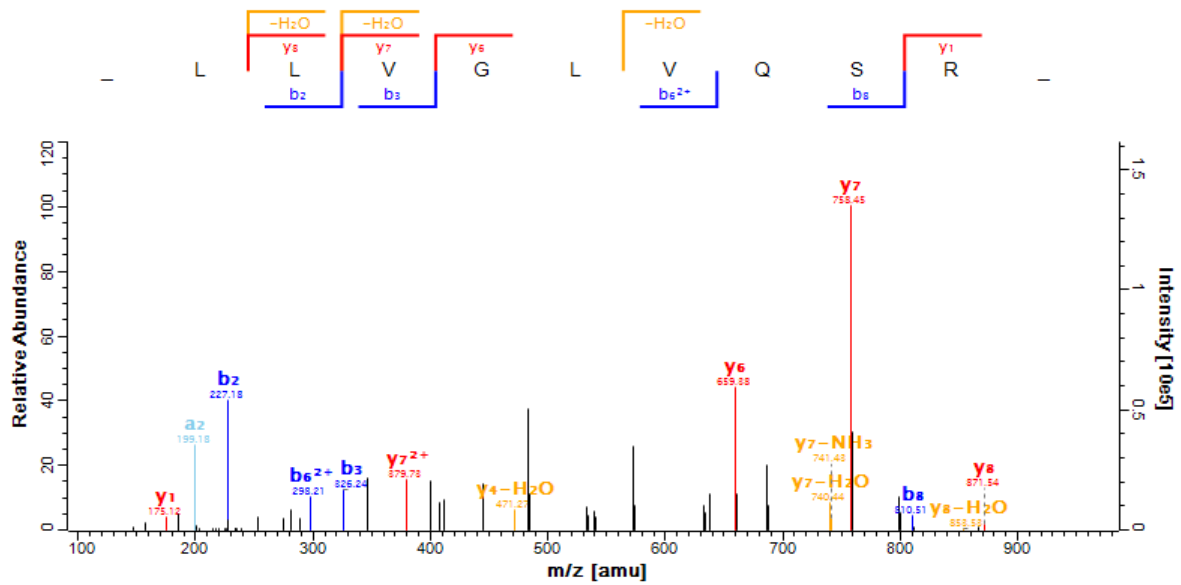

**Protein Group ID:** 3651  
**Protein Accession Numbers:** Q9BTX7; Q5QPC2  
**Gene Names:** TTPAL  
**Peptide Sequence:** FFLHGSDLNSLHTNLPR  
**Total Number of Spectra:** 2  
**Number of Replicates (out of 8):** 2  
**Best Match Score:** 88.561  
**Best Match Posterior Error Probability:** 0.012905  
**Best Match Spectrum:**

**Scan number** 84095      **Raw file** A549-US-Mock-top20CID-Elite-2ug-B11  
**Method** ITMS; CID      **Genenames** TTPAL

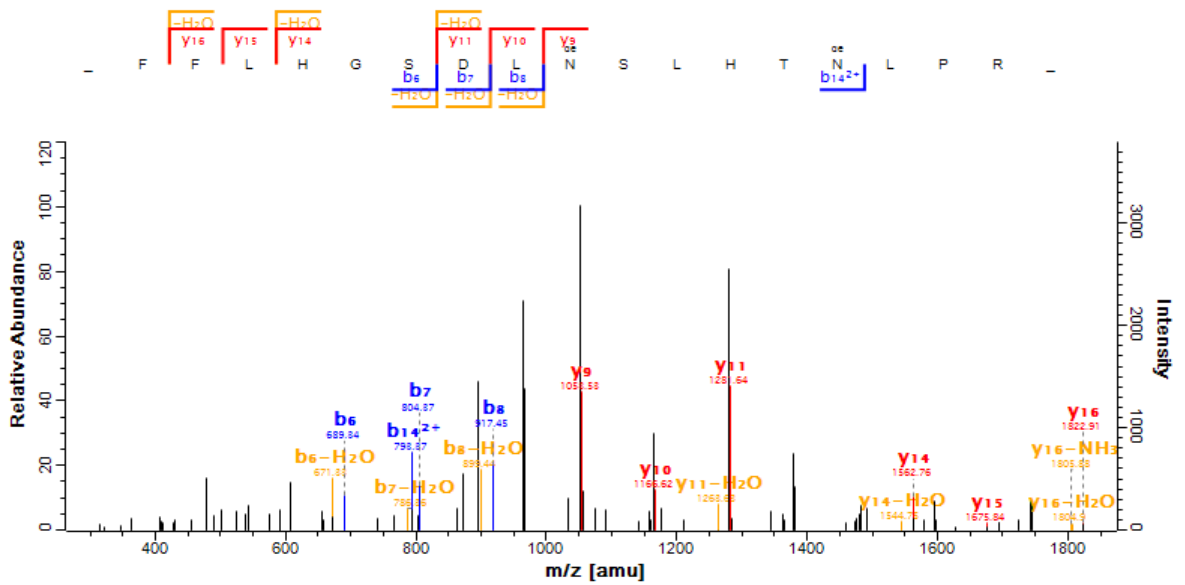

**Protein Group ID:** 3652

**Protein Accession Numbers:** Q5QPG6; Q9BUV8; Q9BUV8-2; Q9BUV8-3; Q9BUV8-4

**Gene Names:** C20orf24

**Peptide Sequence:** RKEEPQPQLANGALK

**Total Number of Spectra:** 1

**Number of Replicates (out of 8):** 1

**Best Match Score:** 127.32

**Best Match Posterior Error Probability:** 0.0075267

**Best Match Spectrum:**

**Scan number** 20032      **Raw file** A549-US-Mock-top20CID-Elite-2ug-B14  
**Method** ITMS; CID      **Genenames** C20orf24

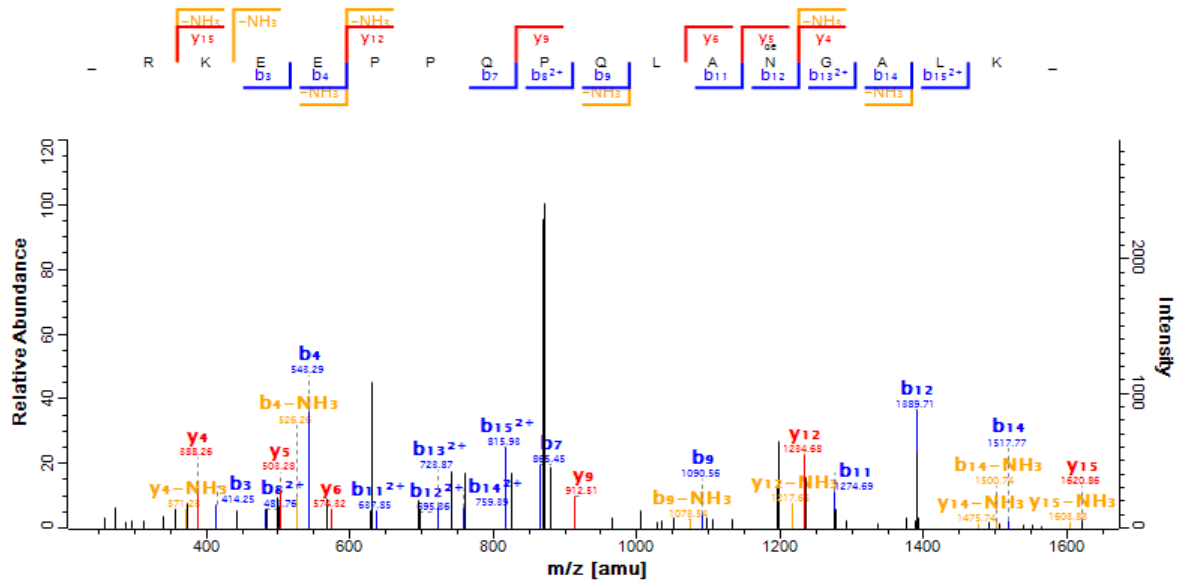



**Protein Group ID:** 3654  
**Protein Accession Numbers:** Q5R3K3  
**Gene Names:** FAM26F  
**Peptide Sequence:** AVLDLHVK  
**Total Number of Spectra:** 8  
**Number of Replicates (out of 8):** 8  
**Best Match Score:** 111.82  
**Best Match Posterior Error Probability:** 0.0027613  
**Best Match Spectrum:**

**Scan number** 18293      **Raw file** A549-US-WT-top20CID-Elite-2ug-B11  
**Method** ITMS; CID      **Genenames** FAM26F

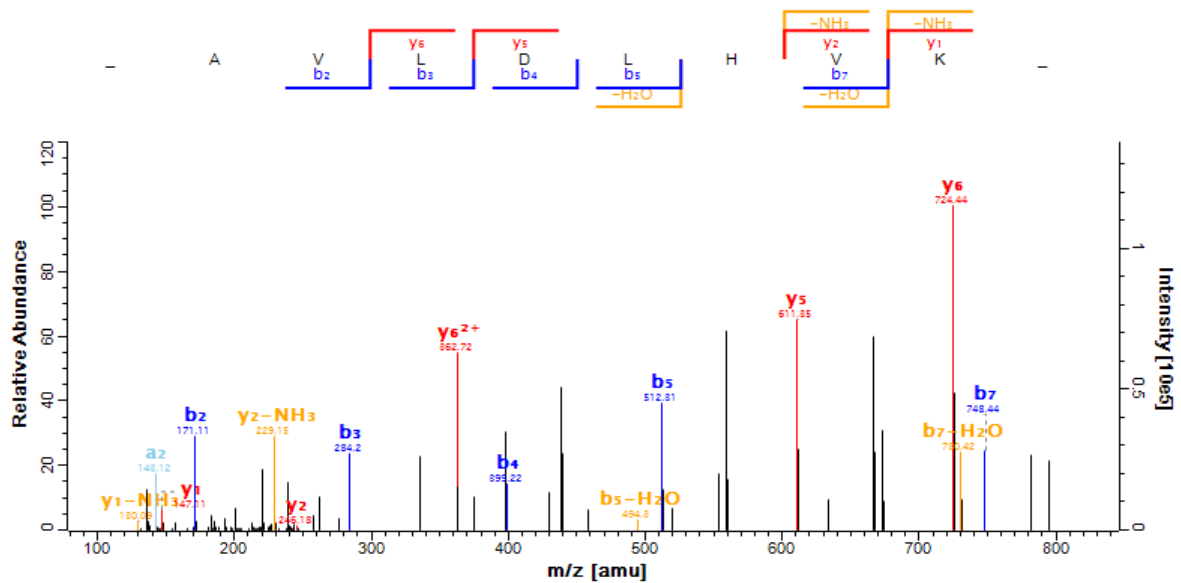

**Protein Group ID:** 3655

**Protein Accession Numbers:** Q9HB21; Q5RGS4; Q9HB21-2

**Gene Names:** PLEKHA1

**Peptide Sequence:** TDIVGGVPIITPTQK

**Total Number of Spectra:** 3

**Number of Replicates (out of 8):** 2

**Best Match Score:** 115.1

**Best Match Posterior Error Probability:** 9.08E-05

**Best Match Spectrum:**

**Scan number** 50571      **Raw file** A549-US-WT-top20CID-Elite-2ug-B13  
**Method** ITMS; CID      **Genenames** PLEKHA1

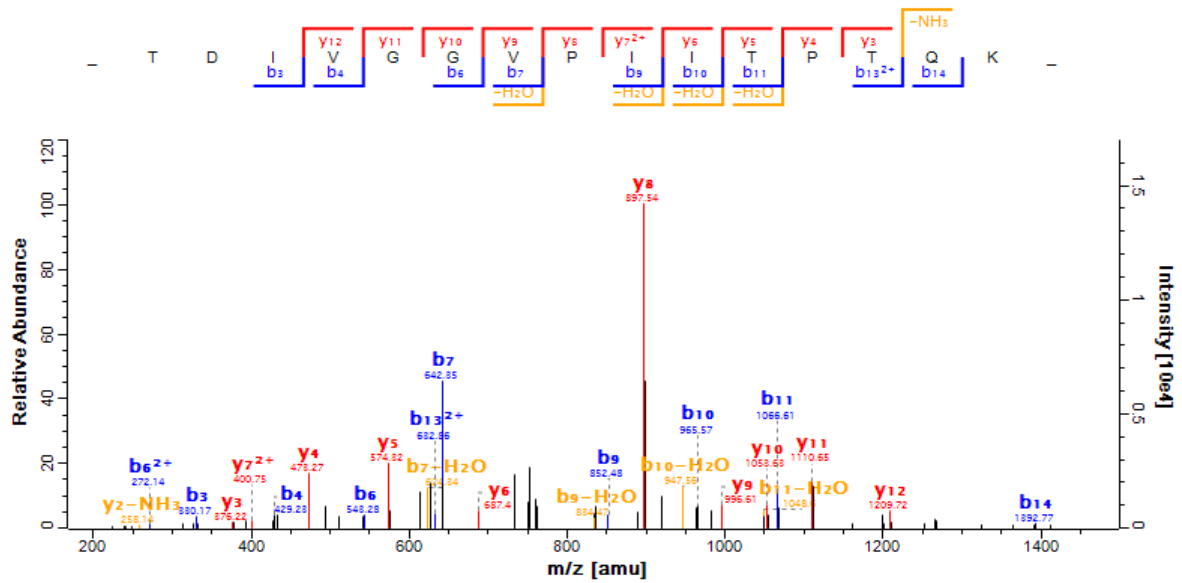

**Protein Group ID:** 3660  
**Protein Accession Numbers:** Q5SVK8; Q6XZF7  
**Gene Names:** RP11-114F7.3;DNMBP  
**Peptide Sequence:** LTQQLIEFEK  
**Total Number of Spectra:** 1  
**Number of Replicates (out of 8):** 1  
**Best Match Score:** 130.56  
**Best Match Posterior Error Probability:** 2.73E-05  
**Best Match Spectrum:**

**Scan number** 43445      **Raw file** A549-US-WT-top20CID-Elite-2ug-B11  
**Method** ITMS; CID      **Genenames** RP11-114F7.3;DNMBP

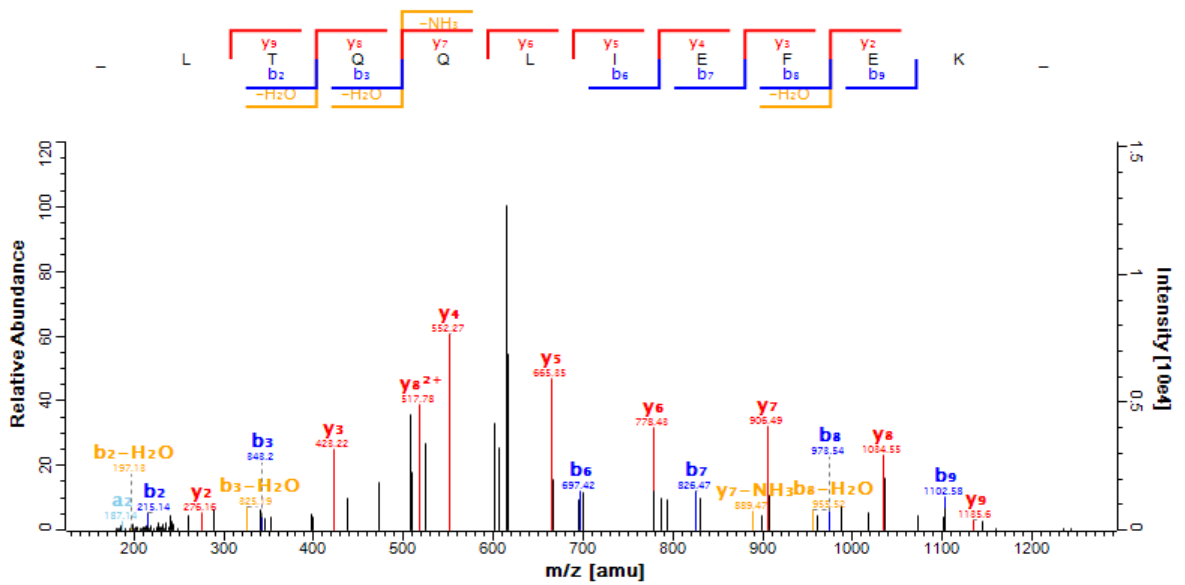

**Protein Group ID:** 3666  
**Protein Accession Numbers:** Q5SYT8  
**Gene Names:** RP11-92J19.4  
**Peptide Sequence:** DAFEHIVTQFSSVPVSVVSN SYDIYNACEK  
**Total Number of Spectra:** 1  
**Number of Replicates (out of 8):** 1  
**Best Match Score:** 71.528  
**Best Match Posterior Error Probability:** 0.00013461  
**Best Match Spectrum:**

**Scan number** 88724      **Raw file** A549-US-Mock-top20CID-Elite-2ug-B13  
**Method** ITMS; CID      **Genenames** RP11-92J19.4

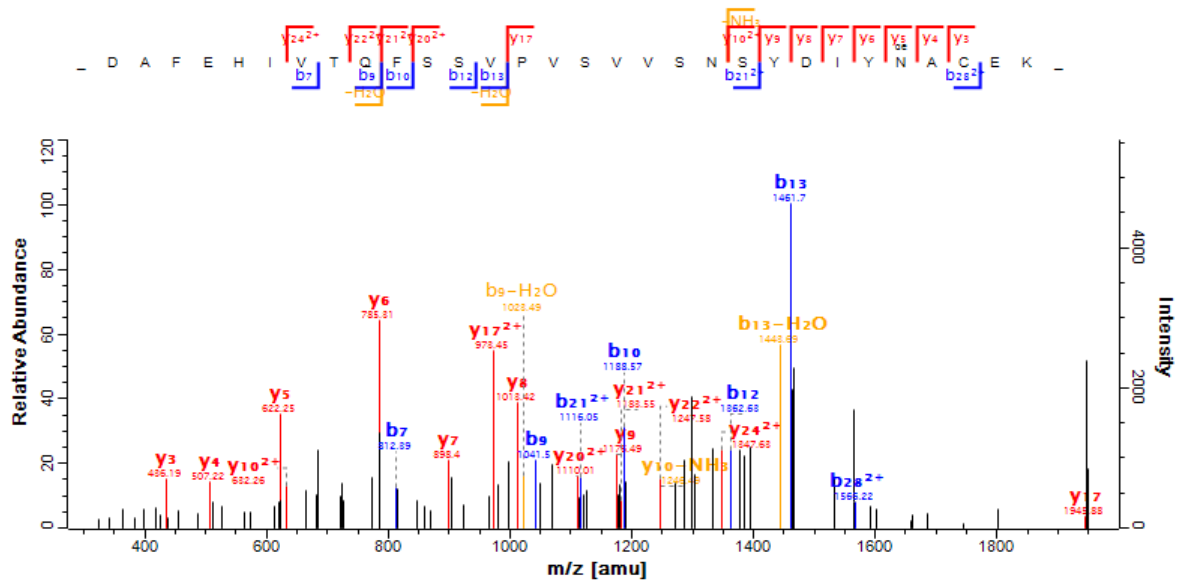

**Protein Group ID:** 3667  
**Protein Accession Numbers:** Q92558; Q5SZK5  
**Gene Names:** WASF1  
**Peptide Sequence:** FYTNPSYFFDLWK  
**Total Number of Spectra:** 2  
**Number of Replicates (out of 8):** 2  
**Best Match Score:** 166.38  
**Best Match Posterior Error Probability:** 3.00E-09  
**Best Match Spectrum:**

**Scan number** 89497      **Raw file** A549-US-Mock-top20CID-Elite-2ug-B14  
**Method** ITMS; CID      **Genenames** WASF1

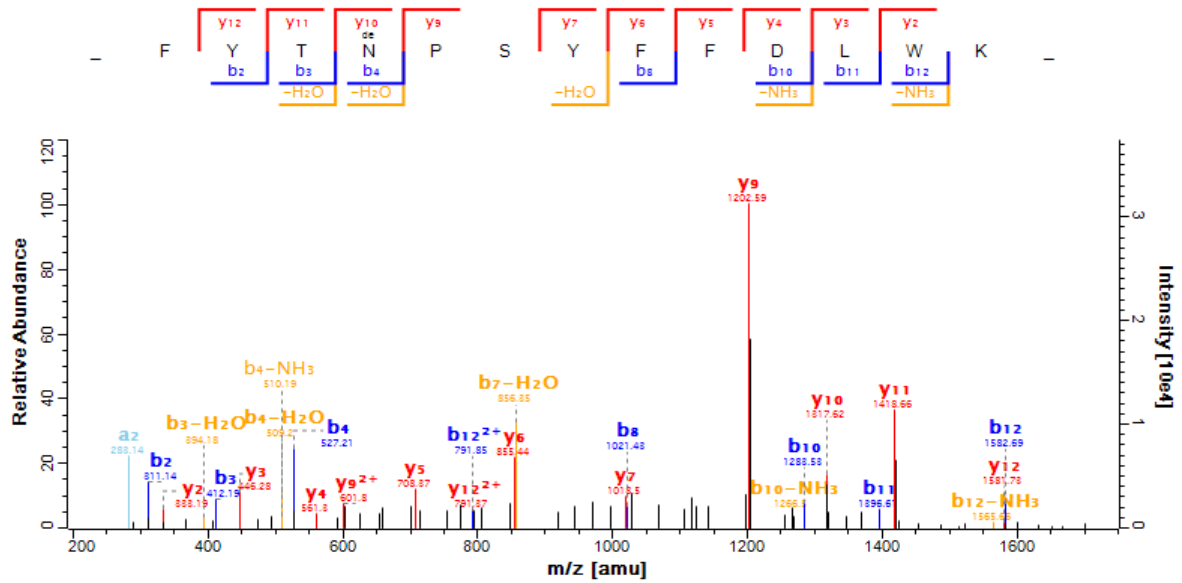

**Protein Group ID:** 3669

**Protein Accession Numbers:** Q9P2S5; Q5T0D5; Q5TBW1

**Gene Names:** WRAP73;WDR8

**Peptide Sequence:** MNFSEVFK

**Total Number of Spectra:** 3

**Number of Replicates (out of 8):** 3

**Best Match Score:** 113.18

**Best Match Posterior Error Probability:** 0.0026419

**Best Match Spectrum:**

**Scan number** 46998      **Raw file** A549-US-Mock-top20CID-Elite-2ug-B11  
**Method** ITMS; CID      **Genenames** WRAP73;WDR8

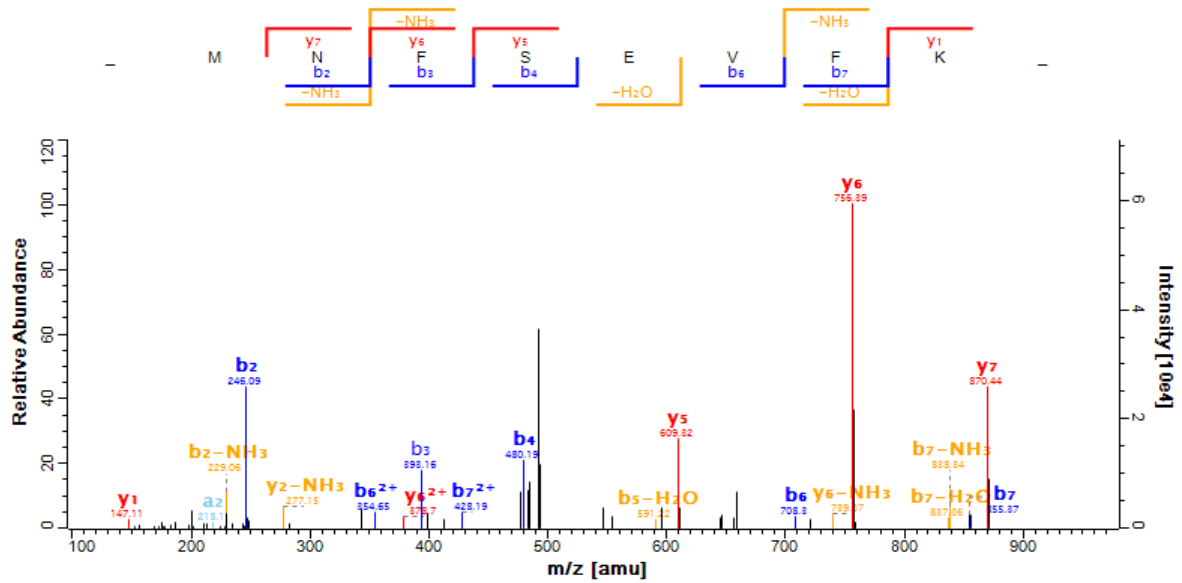

**Protein Group ID:** 3677  
**Protein Accession Numbers:** Q8N5I2; Q5T370  
**Gene Names:** ARRDC1  
**Peptide Sequence:** DTSPVVASLLQK  
**Total Number of Spectra:** 4  
**Number of Replicates (out of 8):** 3  
**Best Match Score:** 92.611  
**Best Match Posterior Error Probability:** 0.0011691  
**Best Match Spectrum:**

**Scan number** 21692      **Raw file** A549-US-WT-top20CID-Elite-2ug-B12  
**Method** ITMS; CID      **Genenames** ARRDC1

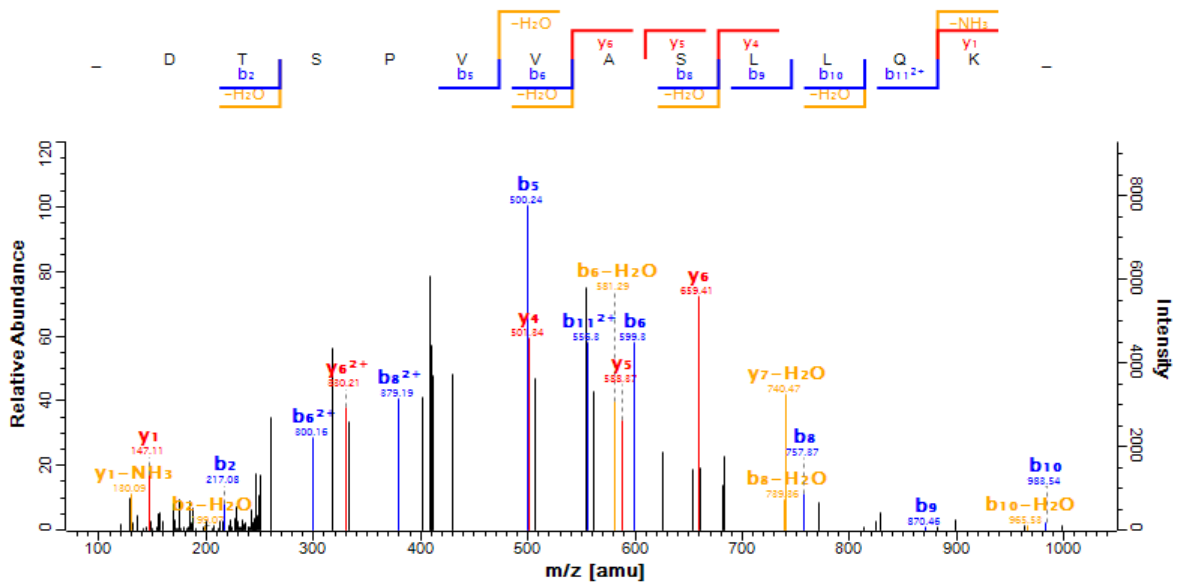

**Protein Group ID:** 3684

**Protein Accession Numbers:** Q5T6J7-2; Q5T6J7; Q5T6J7-3

**Gene Names:** IDNK

**Peptide Sequence:** NVSEIIATIMETLK

**Total Number of Spectra:** 1

**Number of Replicates (out of 8):** 1

**Best Match Score:** 96.866

**Best Match Posterior Error Probability:** 0.00054379

**Best Match Spectrum:**

**Scan number** 96302      **Raw file** A549-US-WT-top20CID-Elite-2ug-B12  
**Method** ITMS; CID      **Genenames** IDNK

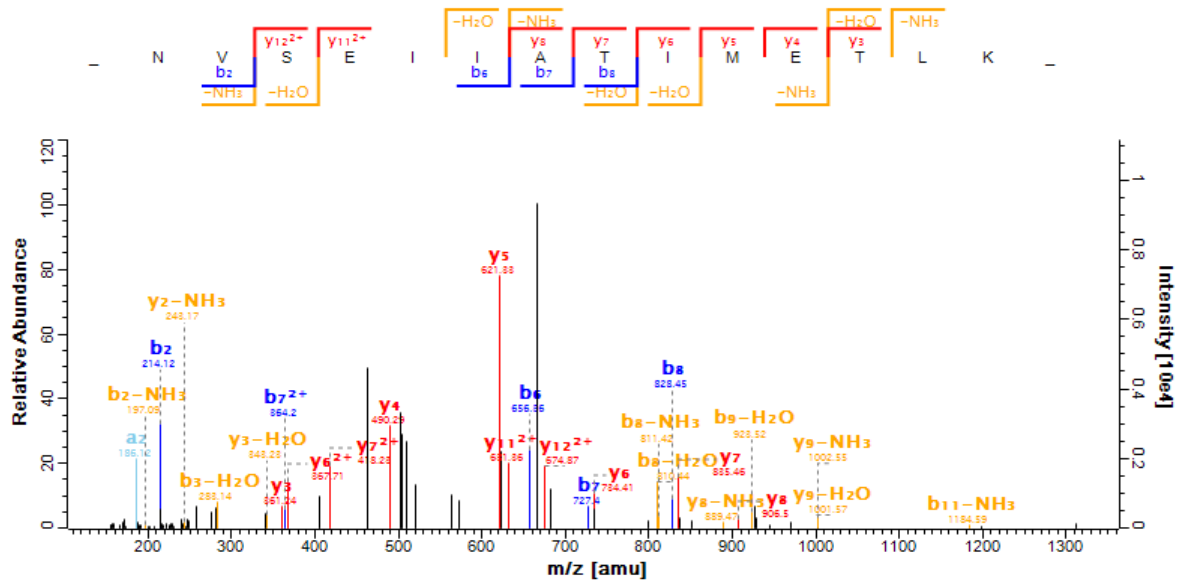



**Protein Group ID:** 3686

**Protein Accession Numbers:** Q8NI60; Q8NI60-3; Q5T7A4; Q5T7A2

**Gene Names:** ADCK3;CABC1

**Peptide Sequence:** LGQMLSIQDDAFINPHLAK

**Total Number of Spectra:** 1

**Number of Replicates (out of 8):** 1

**Best Match Score:** 87.388

**Best Match Posterior Error Probability:** 0.00032391

**Best Match Spectrum:**

|                    |           |                  |                                     |
|--------------------|-----------|------------------|-------------------------------------|
| <b>Scan number</b> | 62282     | <b>Raw file</b>  | A549-US-Mock-top20CID-Elite-2ug-B13 |
| <b>Method</b>      | ITMS; CID | <b>Genenames</b> | ADCK3;CABC1                         |

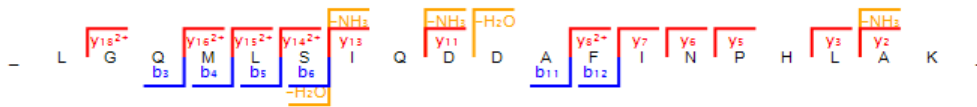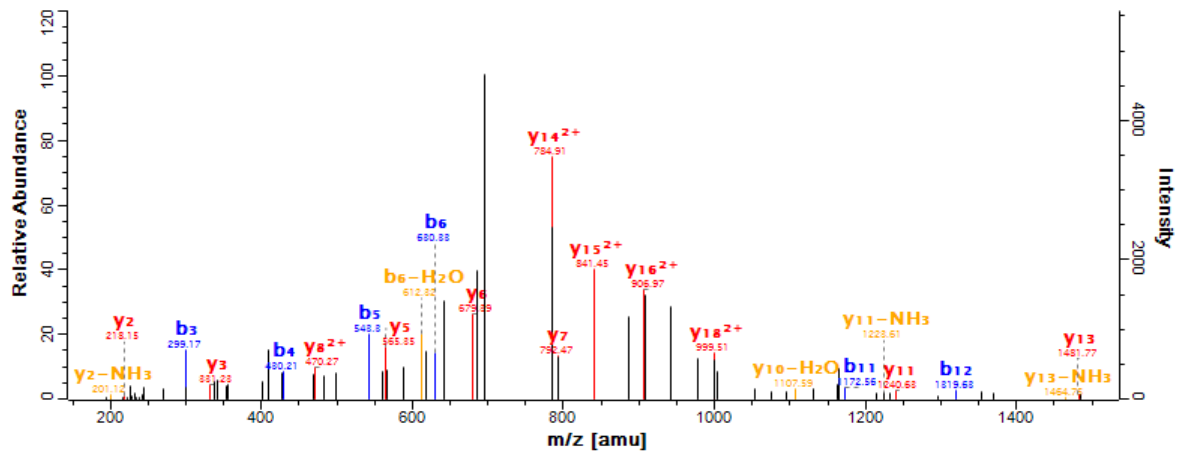

**Protein Group ID:** 3692  
**Protein Accession Numbers:** Q9NTM9; Q5TCZ7  
**Gene Names:** CUTC;RP11-483F11.3  
**Peptide Sequence:** IVVMPGGGITDR  
**Total Number of Spectra:** 4  
**Number of Replicates (out of 8):** 4  
**Best Match Score:** 89.548  
**Best Match Posterior Error Probability:** 0.0014774  
**Best Match Spectrum:**

**Scan number** 36087      **Raw file** A549-US-WT-top20CID-Elite-2ug-B14  
**Method** ITMS; CID      **Genenames** CUTC;RP11-483F11.3

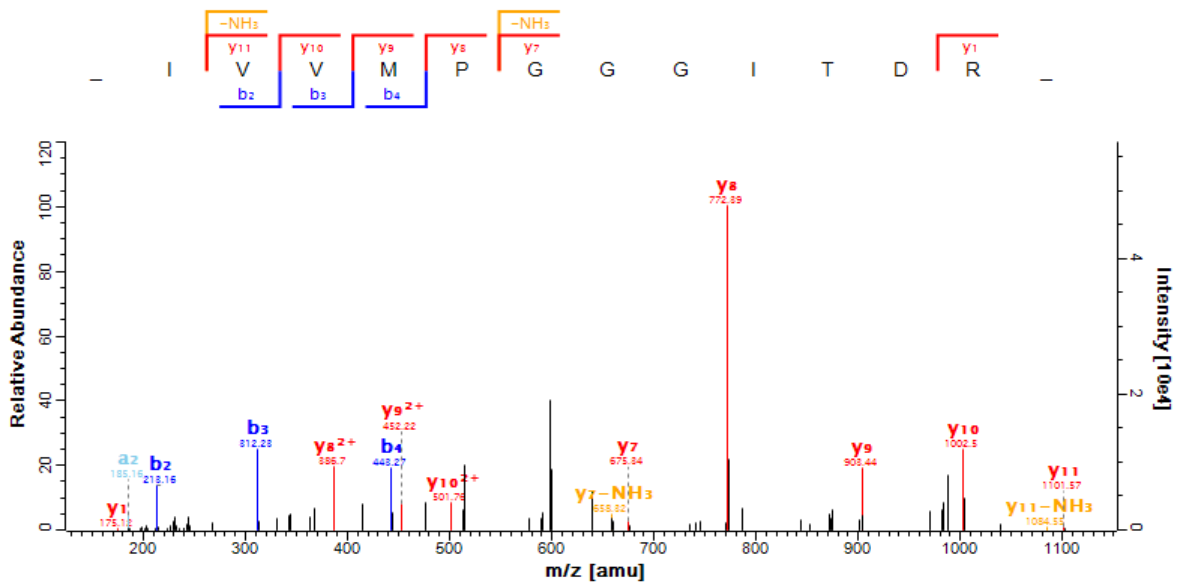

**Protein Group ID:** 3693

**Protein Accession Numbers:** Q9Y2G8; Q5TDH4; Q5TDG9

**Gene Names:** DNAJC16

**Peptide Sequence:** AYEILSNEEK

**Total Number of Spectra:** 2

**Number of Replicates (out of 8):** 2

**Best Match Score:** 121.36

**Best Match Posterior Error Probability:** 9.79E-05

**Best Match Spectrum:**

**Scan number** 24474      **Raw file** A549-US-Mock-top20CID-Elite-2ug-B11  
**Method** ITMS; CID      **Genenames** DNAJC16

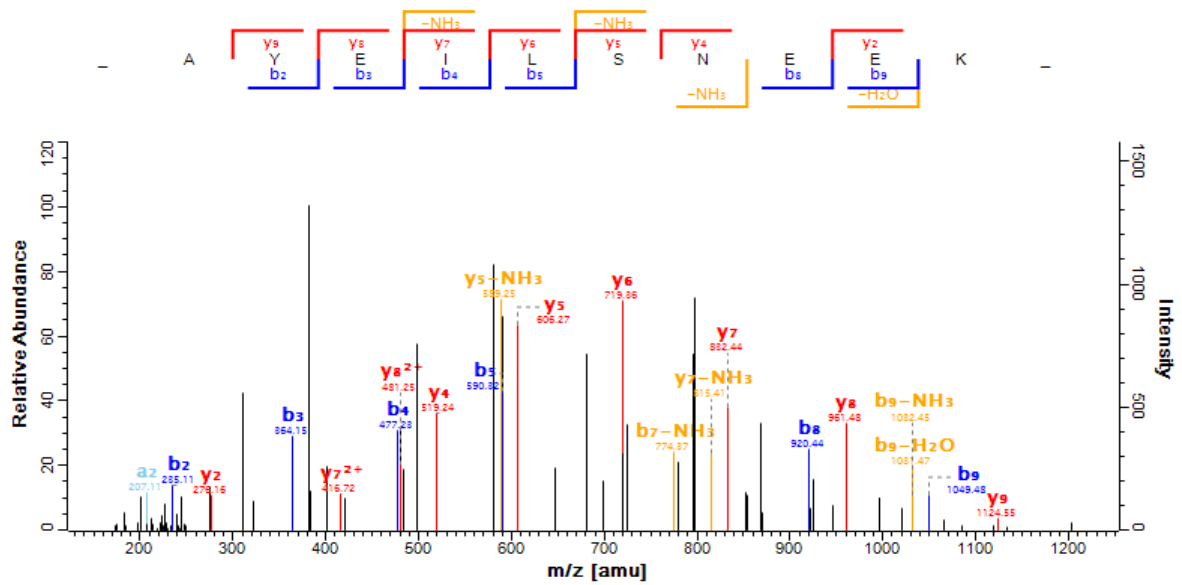

**Protein Group ID:** 3696  
**Protein Accession Numbers:** Q5TEC6  
**Gene Names:** HIST2H3PS2  
**Peptide Sequence:** EIAQEFKTDLR  
**Total Number of Spectra:** 3  
**Number of Replicates (out of 8):** 3  
**Best Match Score:** 96.113  
**Best Match Posterior Error Probability:** 0.0038382  
**Best Match Spectrum:**

**Scan number** 30852      **Raw file** A549-US-WT-top20CID-Elite-2ug-B14  
**Method** ITMS; CID      **Genenames** HIST2H3PS2

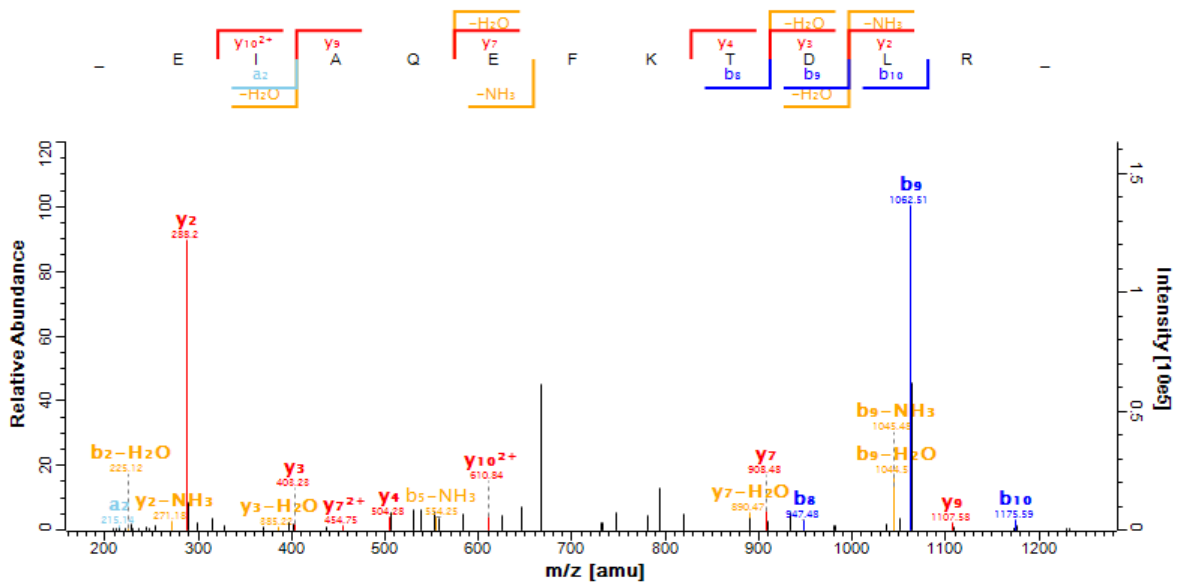

**Protein Group ID:** 3700

**Protein Accession Numbers:** Q5TGZ0

**Gene Names:** MINOS1

**Peptide Sequence:** MWPLAFGSGMGLGMAYSNQCQHDFFQAPLYLLHGK

**Total Number of Spectra:** 1

**Number of Replicates (out of 8):** 1

**Best Match Score:** 68.192

**Best Match Posterior Error Probability:** 1.64E-05

**Best Match Spectrum:**

**Scan number** 83946      **Raw file** A549-US-Mock-top20CID-Elite-2ug-B12  
**Method** ITMS; CID      **Genenames** MINOS1

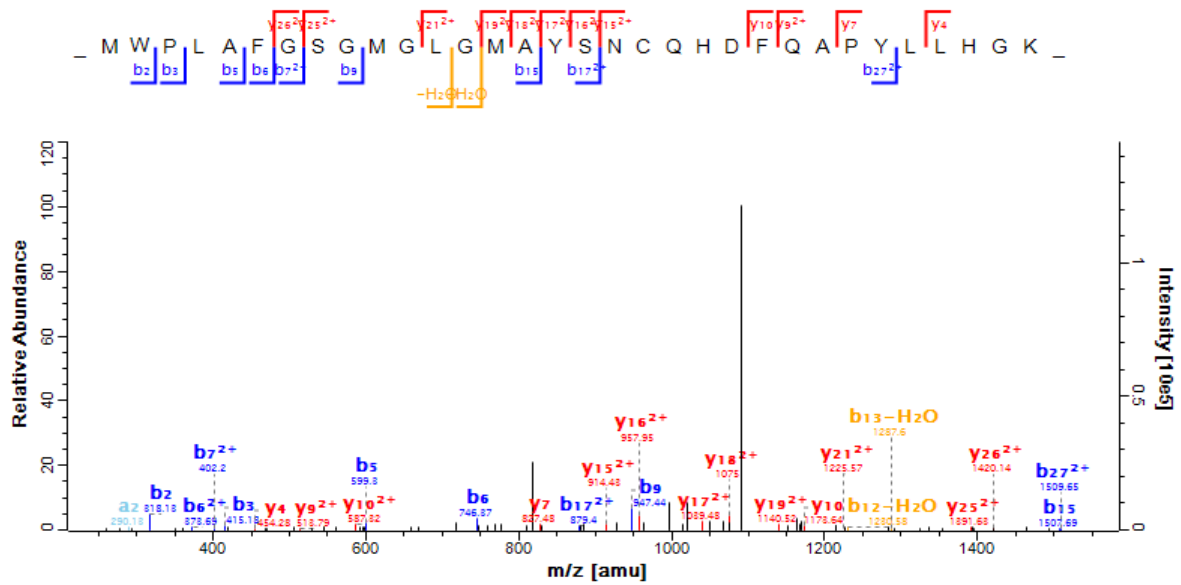

**Protein Group ID:** 3701  
**Protein Accession Numbers:** Q5U3C3; Q9H617  
**Gene Names:** TMEM164;RP13-360B22.2  
**Peptide Sequence:** GSPGSQPEQVTQRPEEGK  
**Total Number of Spectra:** 2  
**Number of Replicates (out of 8):** 2  
**Best Match Score:** 97.291  
**Best Match Posterior Error Probability:** 0.00098005  
**Best Match Spectrum:**

**Scan number** 8715      **Raw file** A549-US-WT-top20CID-Elite-2ug-B13  
**Method** ITMS; CID      **Genenames** TMEM164;RP13-360B22.2

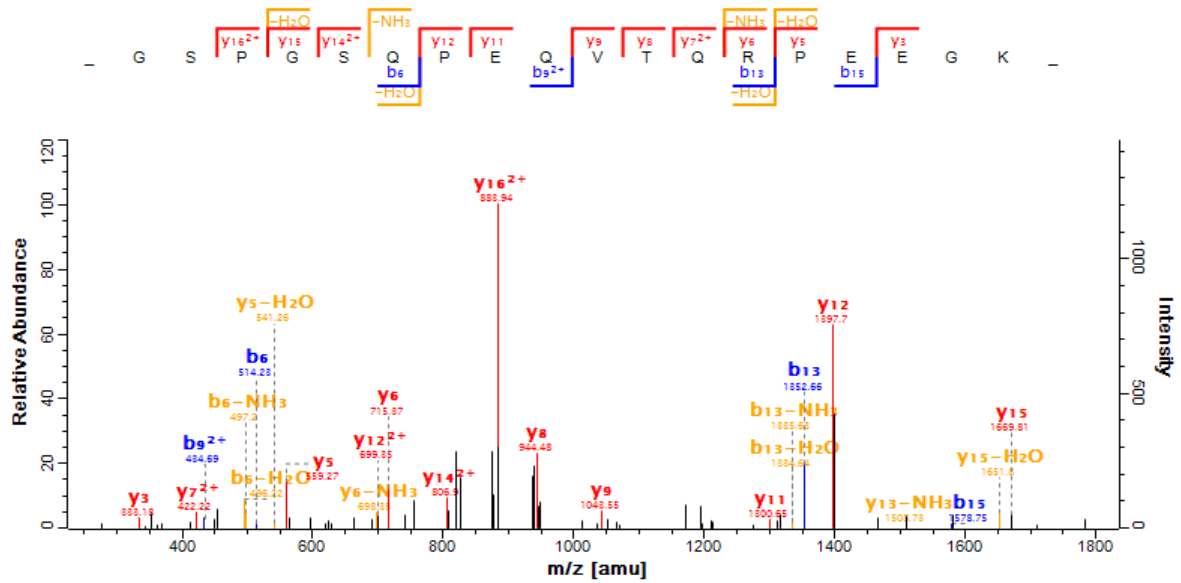



**Protein Group ID:** 3703  
**Protein Accession Numbers:** Q5UCC4; Q5UCC4-2  
**Gene Names:** C19orf63  
**Peptide Sequence:** GSLLWNQQDGTLSLSQR  
**Total Number of Spectra:** 8  
**Number of Replicates (out of 8):** 7  
**Best Match Score:** 294.93  
**Best Match Posterior Error Probability:** 2.89E-162  
**Best Match Spectrum:**

**Scan number** 56048      **Raw file** A549-US-WT-top20CID-Elite-2ug-B13  
**Method** ITMS; CID      **Genenames** C19orf63

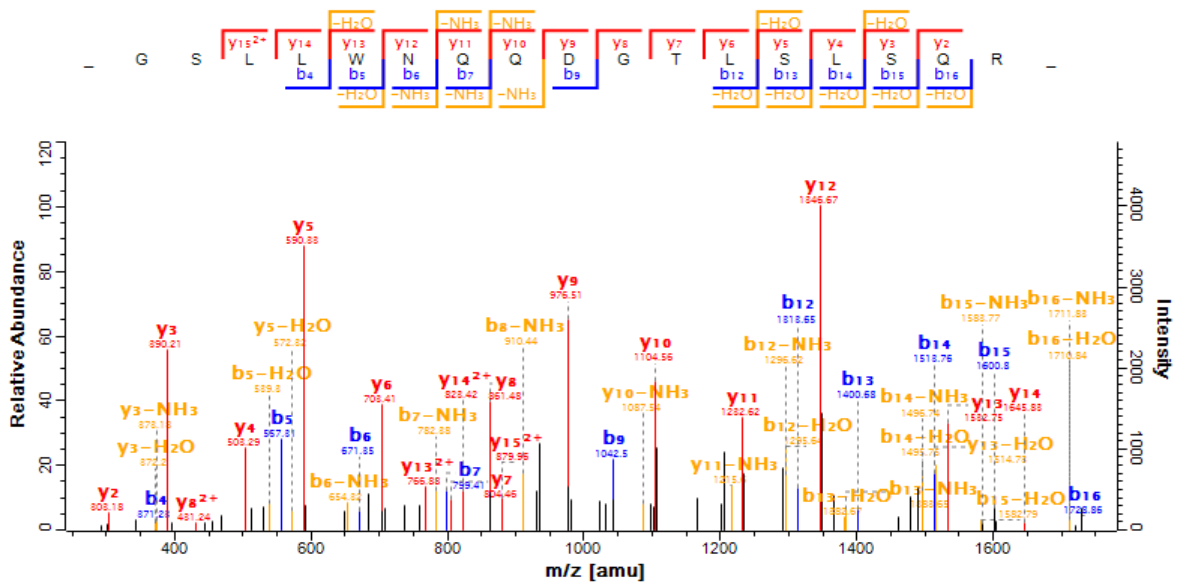



**Protein Group ID:** 3720

**Protein Accession Numbers:** Q5VZM2; Q5VZM2-2; Q7L523; Q5VZM0

**Gene Names:** RRAGB;RRAGA

**Peptide Sequence:** MDLVQEDQR

**Total Number of Spectra:** 3

**Number of Replicates (out of 8):** 3

**Best Match Score:** 91.549

**Best Match Posterior Error Probability:** 0.0035899

**Best Match Spectrum:**

|                    |           |                  |                                   |
|--------------------|-----------|------------------|-----------------------------------|
| <b>Scan number</b> | 17489     | <b>Raw file</b>  | A549-US-WT-top20CID-Elite-2ug-811 |
| <b>Method</b>      | ITMS; CID | <b>Genenames</b> | RRAGB;RRAGA                       |

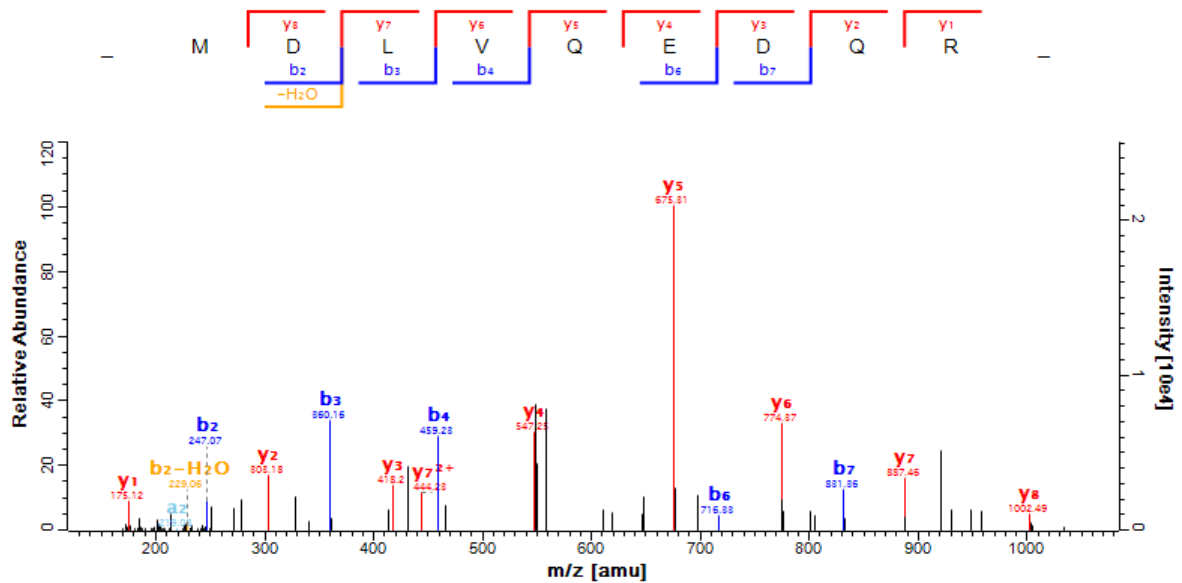

**Protein Group ID:** 3721

**Protein Accession Numbers:** Q9H497; Q9H497-2; Q9H497-3; Q5W0C6

**Gene Names:** TOR3A

**Peptide Sequence:** AESPWTIFLFLSNLR

**Total Number of Spectra:** 1

**Number of Replicates (out of 8):** 1

**Best Match Score:** 126.95

**Best Match Posterior Error Probability:** 7.84E-05

**Best Match Spectrum:**

|                    |           |                  |                                     |
|--------------------|-----------|------------------|-------------------------------------|
| <b>Scan number</b> | 94435     | <b>Raw file</b>  | A549-US-Mock-top20CID-Elite-2ug-B13 |
| <b>Method</b>      | ITMS; CID | <b>Genenames</b> | TOR3A                               |

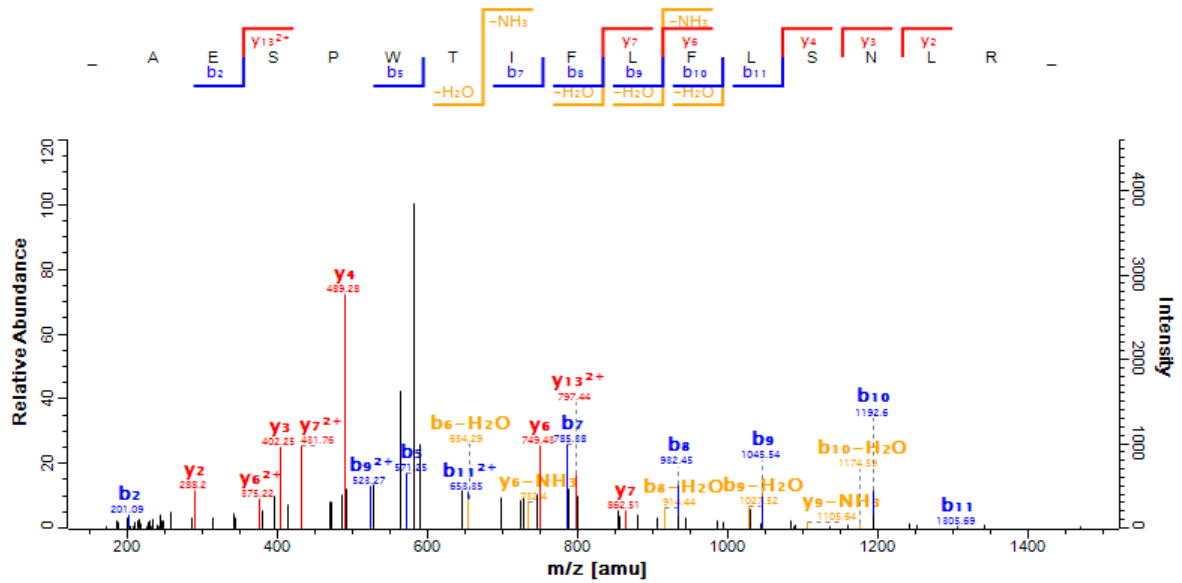

**Protein Group ID:** 3729  
**Protein Accession Numbers:** Q66LE6; F5GXJ6  
**Gene Names:** PPP2R2D  
**Peptide Sequence:** FFEEPEDPSSR  
**Total Number of Spectra:** 5  
**Number of Replicates (out of 8):** 5  
**Best Match Score:** 86.344  
**Best Match Posterior Error Probability:** 0.0020358  
**Best Match Spectrum:**

**Scan number** 26747      **Raw file** A549-US-WT-top20CID-Elite-2ug-B14  
**Method** ITMS; CID      **Genenames** PPP2R2D

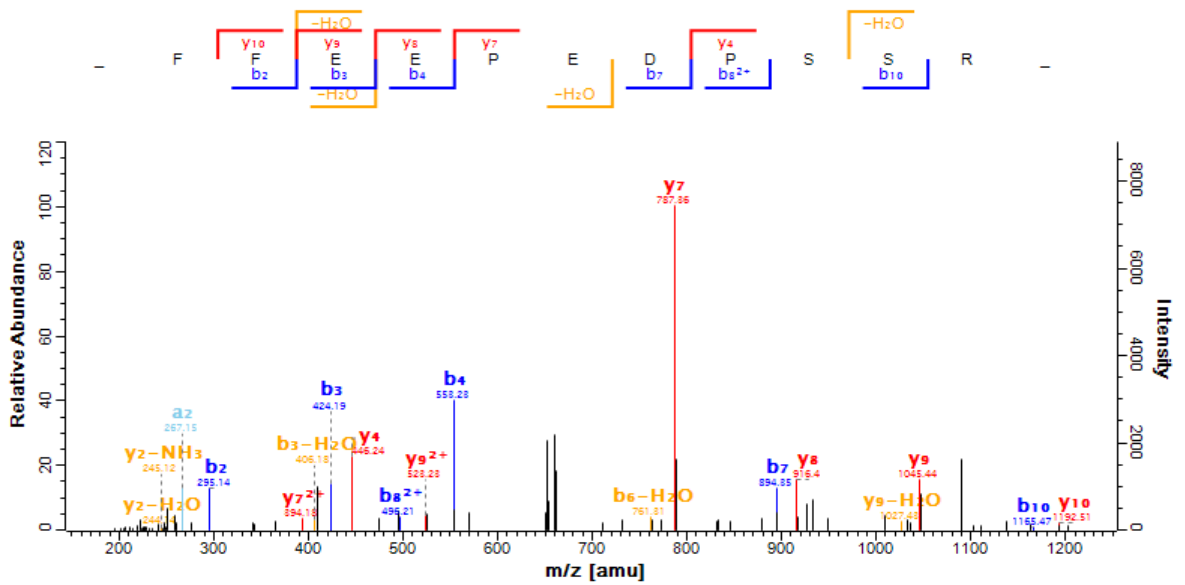

**Protein Group ID:** 3737  
**Protein Accession Numbers:** Q6DD87  
**Gene Names:** ZNF787  
**Peptide Sequence:** AGGEEEDDDDEAAGGR  
**Total Number of Spectra:** 5  
**Number of Replicates (out of 8):** 5  
**Best Match Score:** 171.26  
**Best Match Posterior Error Probability:** 4.44E-14  
**Best Match Spectrum:**

**Scan number** 2953      **Raw file** A549-US-WT-top20CID-Elite-2ug-B13  
**Method** ITMS; CID      **Genenames** ZNF787

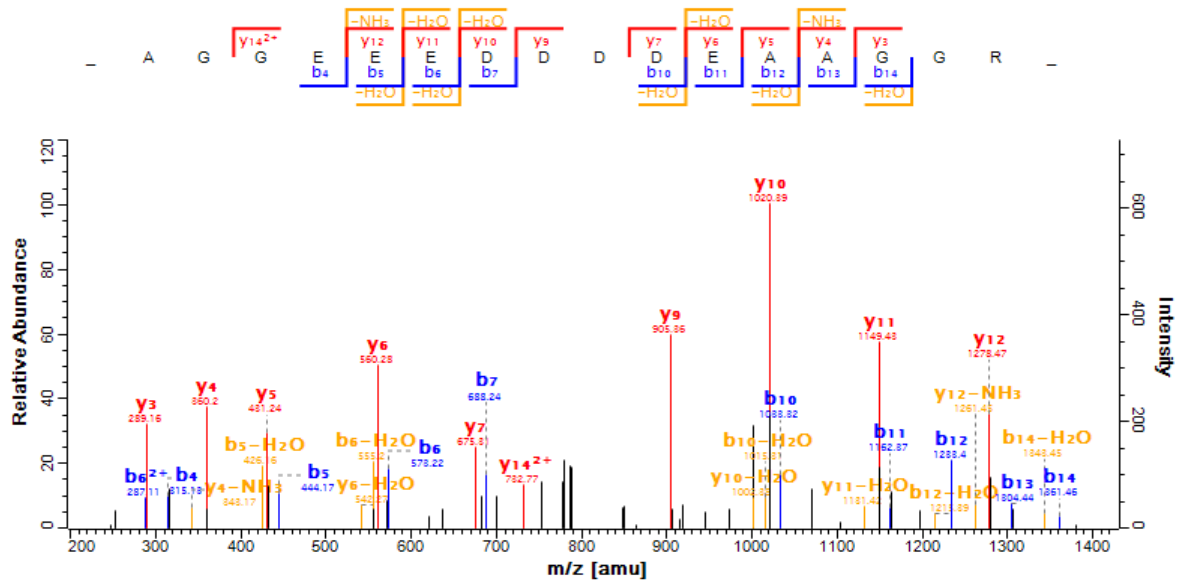

**Protein Group ID:** 3745  
**Protein Accession Numbers:** Q6GQQ9  
**Gene Names:** OTUD7B  
**Peptide Sequence:** HQYQEEMIQR  
**Total Number of Spectra:** 6  
**Number of Replicates (out of 8):** 6  
**Best Match Score:** 104.82  
**Best Match Posterior Error Probability:** 0.00057121  
**Best Match Spectrum:**

**Scan number** 13076      **Raw file** A549-US-WT-top20CID-Elite-2ug-814  
**Method** ITMS; CID      **Genenames** OTUD7B

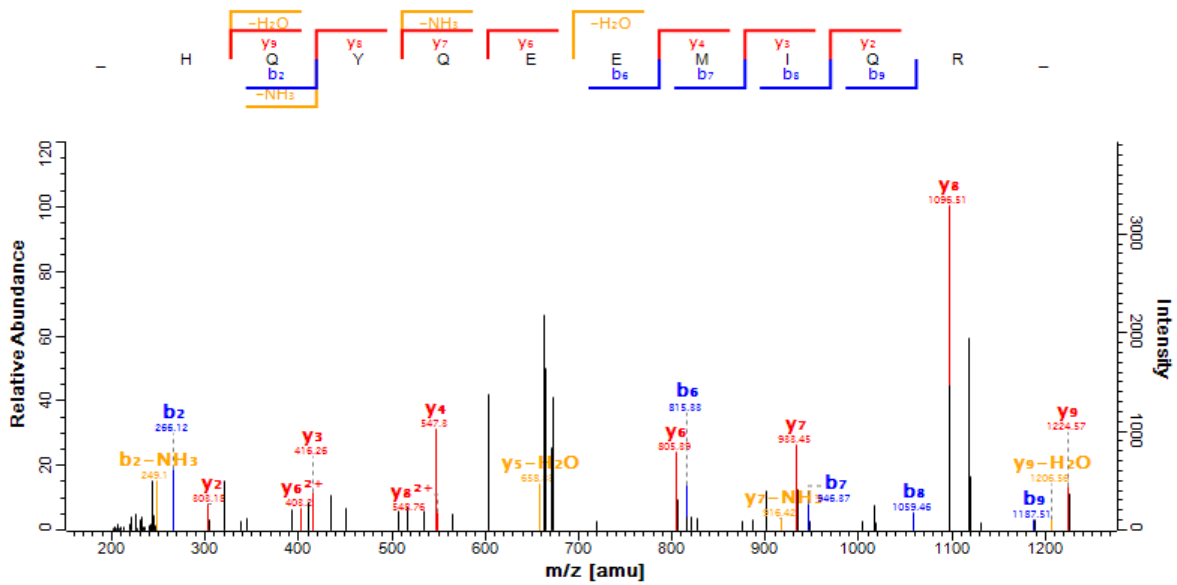

**Protein Group ID:** 3754  
**Protein Accession Numbers:** Q6N065  
**Gene Names:** DKFZp686O15128  
**Peptide Sequence:** FLQLQILSQQQQQQHR  
**Total Number of Spectra:** 4  
**Number of Replicates (out of 8):** 4  
**Best Match Score:** 74.296  
**Best Match Posterior Error Probability:** 0.00036652  
**Best Match Spectrum:**

**Scan number** 69332      **Raw file** A549-US-Mock-top20CID-Elite-2ug-B13  
**Method** ITMS; CID      **Genenames** DKFZp686O15128

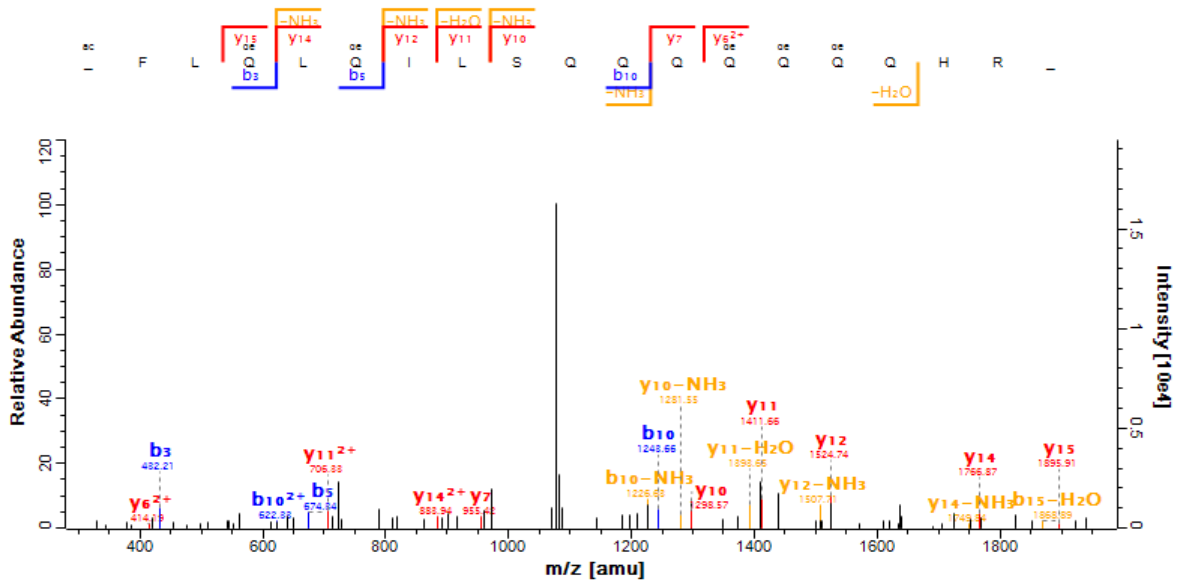

**Protein Group ID:** 3757

**Protein Accession Numbers:** Q6NUK4

**Gene Names:** REEP3

**Peptide Sequence:** SFSMHDLTITQGDPEVGRPYQLPEAK

**Total Number of Spectra:** 1

**Number of Replicates (out of 8):** 1

**Best Match Score:** 73.831

**Best Match Posterior Error Probability:** 0.00036063

**Best Match Spectrum:**

**Scan number** 54342      **Raw file** A549-US-Mock-top20CID-Elite-2ug-B11  
**Method** ITMS; CID      **Genenames** REEP3

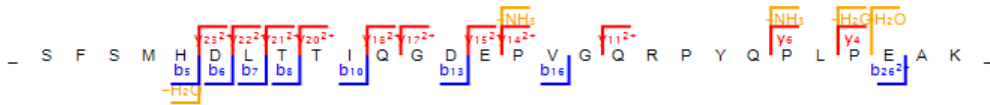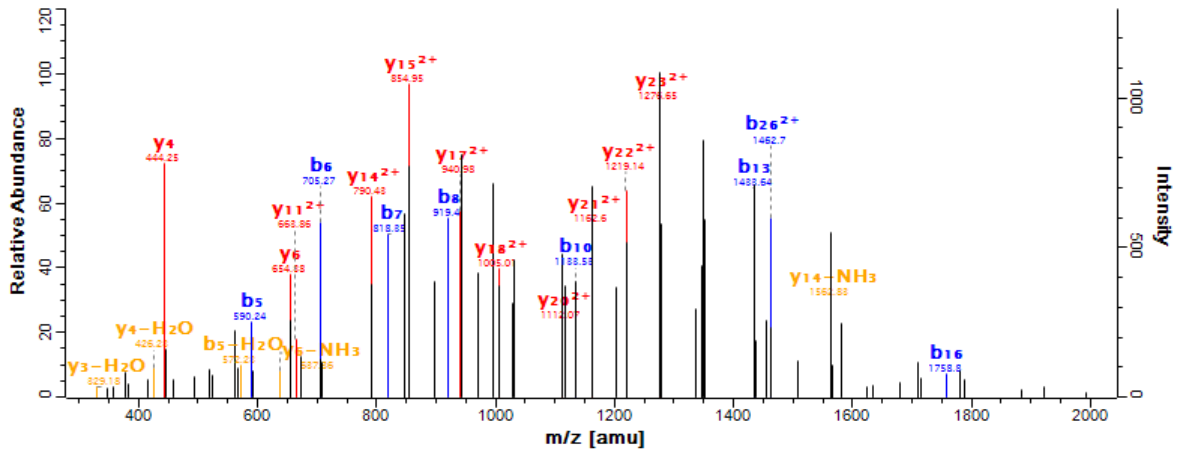

**Protein Group ID:** 3758  
**Protein Accession Numbers:** Q6NUQ1  
**Gene Names:** RINT1  
**Peptide Sequence:** YSLPASPSVILPIQVMLTPLQK  
**Total Number of Spectra:** 1  
**Number of Replicates (out of 8):** 1  
**Best Match Score:** 106.67  
**Best Match Posterior Error Probability:** 4.19E-06  
**Best Match Spectrum:**

**Scan number** 91875      **Raw file** A549-US-Mock-top20CID-Elite-2ug-B14  
**Method** ITMS; CID      **Genenames** RINT1

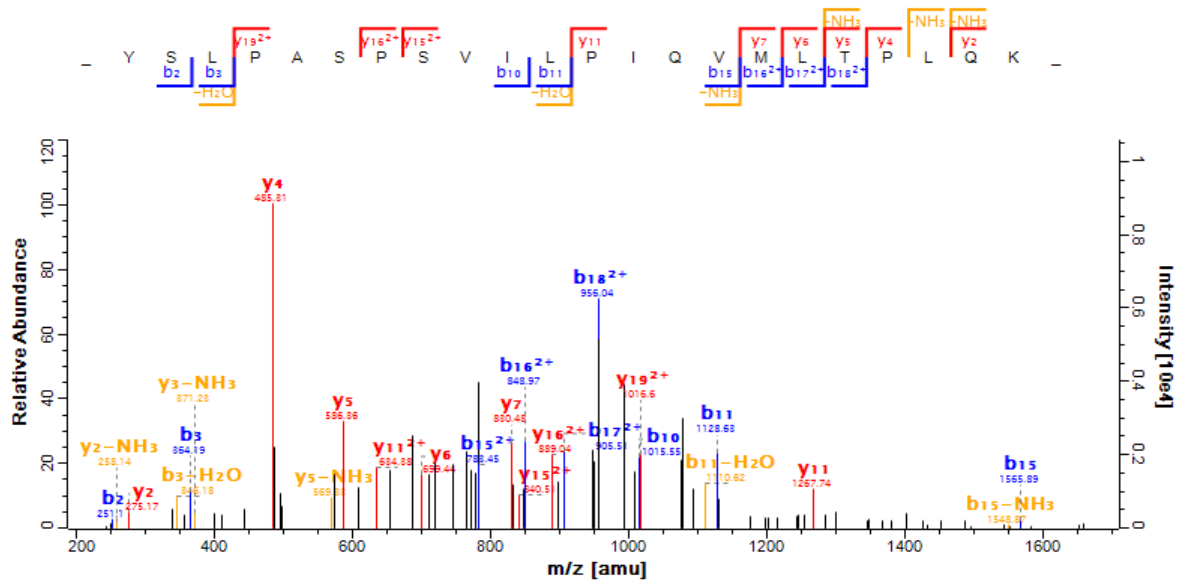



**Protein Group ID:** 3768  
**Protein Accession Numbers:** Q6P1M0; Q96G53  
**Gene Names:** SLC27A4  
**Peptide Sequence:** AGMAAVASPTGNCDLER  
**Total Number of Spectra:** 1  
**Number of Replicates (out of 8):** 1  
**Best Match Score:** 110.84  
**Best Match Posterior Error Probability:** 9.66E-05  
**Best Match Spectrum:**

**Scan number** 28996      **Raw file** A549-US-WT-top20CID-Elite-2ug-B13  
**Method** ITMS; CID      **Genenames** SLC27A4

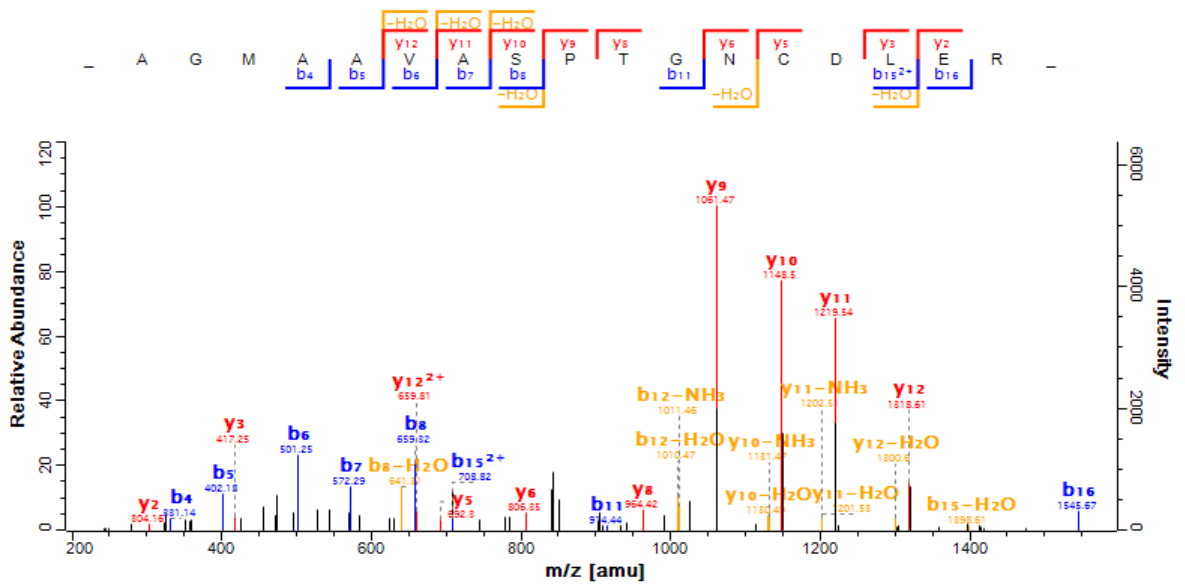

**Protein Group ID:** 3774

**Protein Accession Numbers:** Q6P4E1-4; Q6P4E1; Q6P4E1-2

**Gene Names:** CASC4

**Peptide Sequence:** RGGDAGMPGIEENDLAK

**Total Number of Spectra:** 1

**Number of Replicates (out of 8):** 1

**Best Match Score:** 80.545

**Best Match Posterior Error Probability:** 0.0035143

**Best Match Spectrum:**

|                    |           |                  |                                   |
|--------------------|-----------|------------------|-----------------------------------|
| <b>Scan number</b> | 29318     | <b>Raw file</b>  | A549-US-WT-top20CID-Elite-2ug-B11 |
| <b>Method</b>      | ITMS; CID | <b>Genenames</b> | CASC4                             |

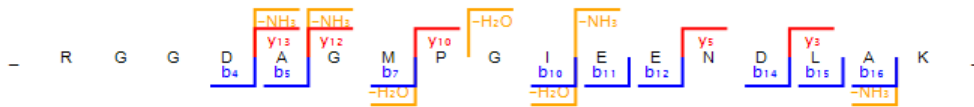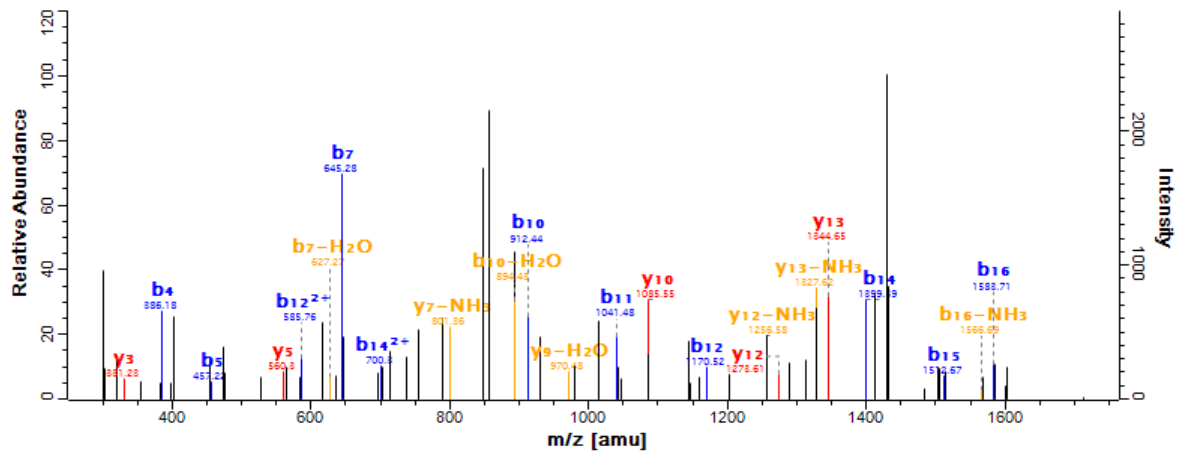

**Protein Group ID:** 3783  
**Protein Accession Numbers:** Q6PI78  
**Gene Names:** TMEM65  
**Peptide Sequence:** DFIYSLHSTER  
**Total Number of Spectra:** 3  
**Number of Replicates (out of 8):** 3  
**Best Match Score:** 91.937  
**Best Match Posterior Error Probability:** 0.0012764  
**Best Match Spectrum:**

|                    |           |                  |                                     |
|--------------------|-----------|------------------|-------------------------------------|
| <b>Scan number</b> | 35571     | <b>Raw file</b>  | A549-US-Mock-top20CID-Elite-2ug-B12 |
| <b>Method</b>      | ITMS; CID | <b>Genenames</b> | TMEM65                              |

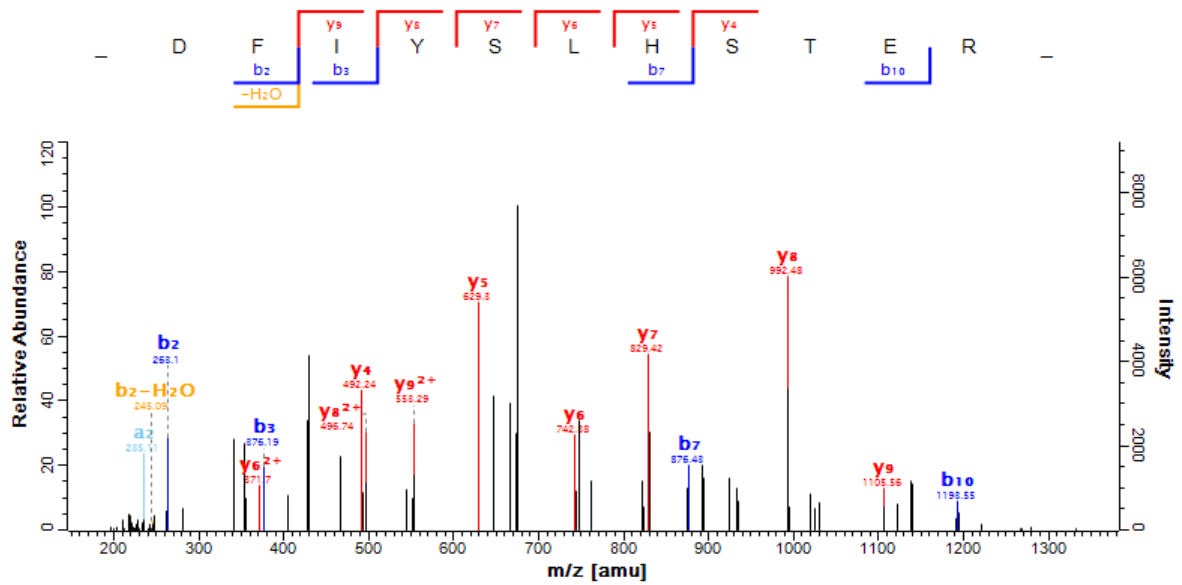

**Protein Group ID:** 3791  
**Protein Accession Numbers:** Q6R327-3; Q6R327  
**Gene Names:** RICTOR  
**Peptide Sequence:** HIEDTGSTPSIGENDLK  
**Total Number of Spectra:** 1  
**Number of Replicates (out of 8):** 1  
**Best Match Score:** 85.988  
**Best Match Posterior Error Probability:** 0.00069742  
**Best Match Spectrum:**

|                    |           |                  |                                   |
|--------------------|-----------|------------------|-----------------------------------|
| <b>Scan number</b> | 26988     | <b>Raw file</b>  | A549-US-WT-top20CID-Elite-2ug-B11 |
| <b>Method</b>      | ITMS; CID | <b>Genenames</b> | RICTOR                            |

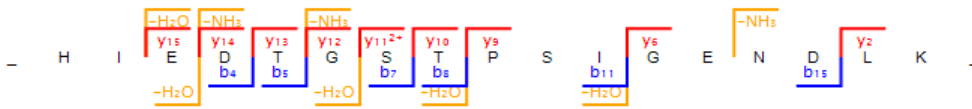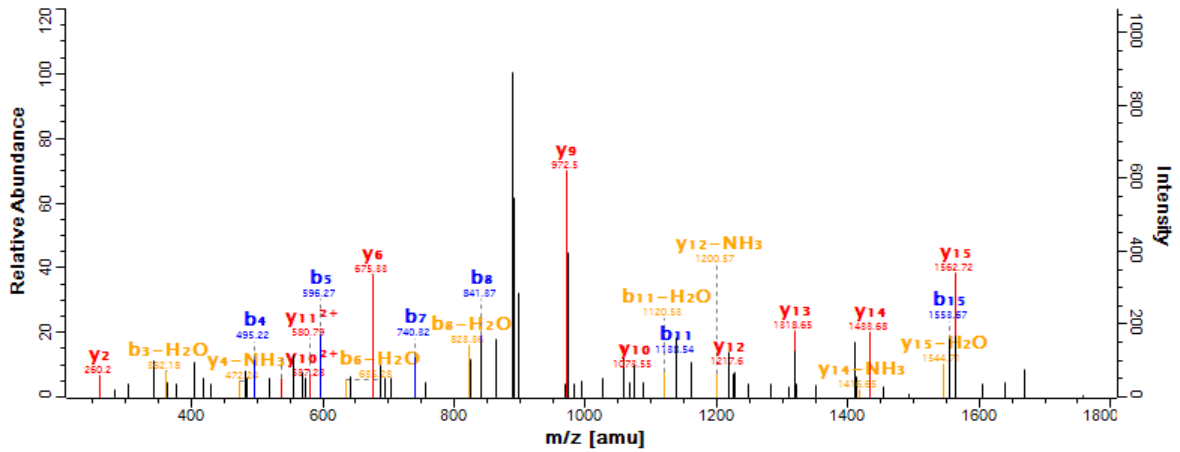

**Protein Group ID:** 3792  
**Protein Accession Numbers:** Q6RW13; Q6RW13-2  
**Gene Names:** AGTRAP  
**Peptide Sequence:** SAYQTIDSAEAPADPFAVPEGR  
**Total Number of Spectra:** 14  
**Number of Replicates (out of 8):** 8  
**Best Match Score:** 171.42  
**Best Match Posterior Error Probability:** 1.15E-20  
**Best Match Spectrum:**

**Scan number** 54412      **Raw file** A549-US-WT-top20CID-Elite-2ug-B13  
**Method** ITMS; CID      **Genenames** AGTRAP

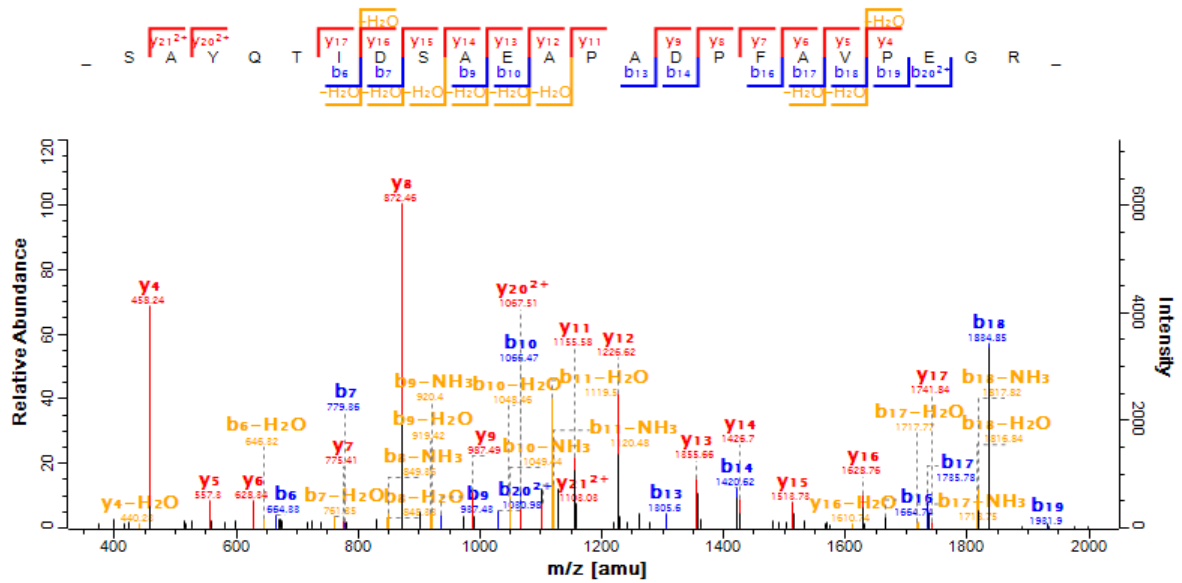

**Protein Group ID:** 3796

**Protein Accession Numbers:** Q6UWJ1; Q6UWJ1-2; Q6UWJ1-3

**Gene Names:** TMCO3

**Peptide Sequence:** LFQVHTFEIFQK

**Total Number of Spectra:** 2

**Number of Replicates (out of 8):** 2

**Best Match Score:** 99.522

**Best Match Posterior Error Probability:** 0.00052363

**Best Match Spectrum:**

**Scan number** 61413      **Raw file** A549-US-Mock-top20CID-Elite-2ug-B13  
**Method** ITMS; CID      **Genenames** TMCO3

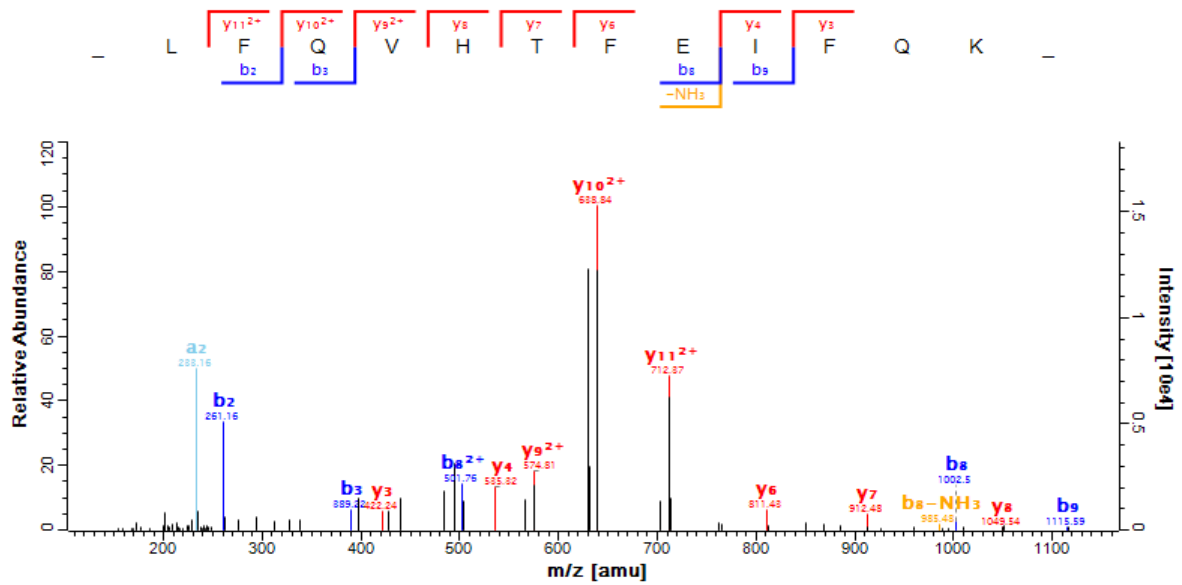

**Protein Group ID:** 3798  
**Protein Accession Numbers:** Q6UWP8  
**Gene Names:** SBSN  
**Peptide Sequence:** FGQGAHHAAGQAGNEAGR  
**Total Number of Spectra:** 3  
**Number of Replicates (out of 8):** 3  
**Best Match Score:** 127.18  
**Best Match Posterior Error Probability:** 4.54E-05  
**Best Match Spectrum:**

**Scan number** 3383      **Raw file** A549-US-WT-top20CID-Elite-2ug-B14  
**Method** ITMS; CID      **Genenames** SBSN

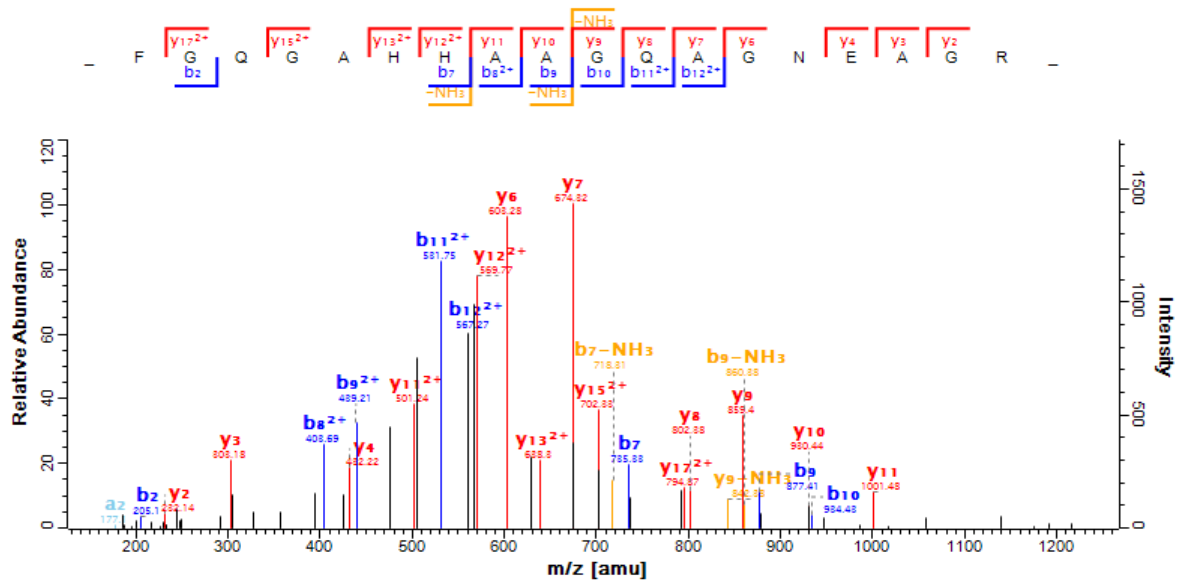

**Protein Group ID:** 3800  
**Protein Accession Numbers:** Q6UX53  
**Gene Names:** METTL7B  
**Peptide Sequence:** DLENAQFSEIQMER  
**Total Number of Spectra:** 10  
**Number of Replicates (out of 8):** 7  
**Best Match Score:** 168.1  
**Best Match Posterior Error Probability:** 7.09E-11  
**Best Match Spectrum:**

**Scan number** 47249      **Raw file** A549-US-WT-top20CID-Elite-2ug-B12  
**Method** ITMS; CID      **Genenames** METTL7B

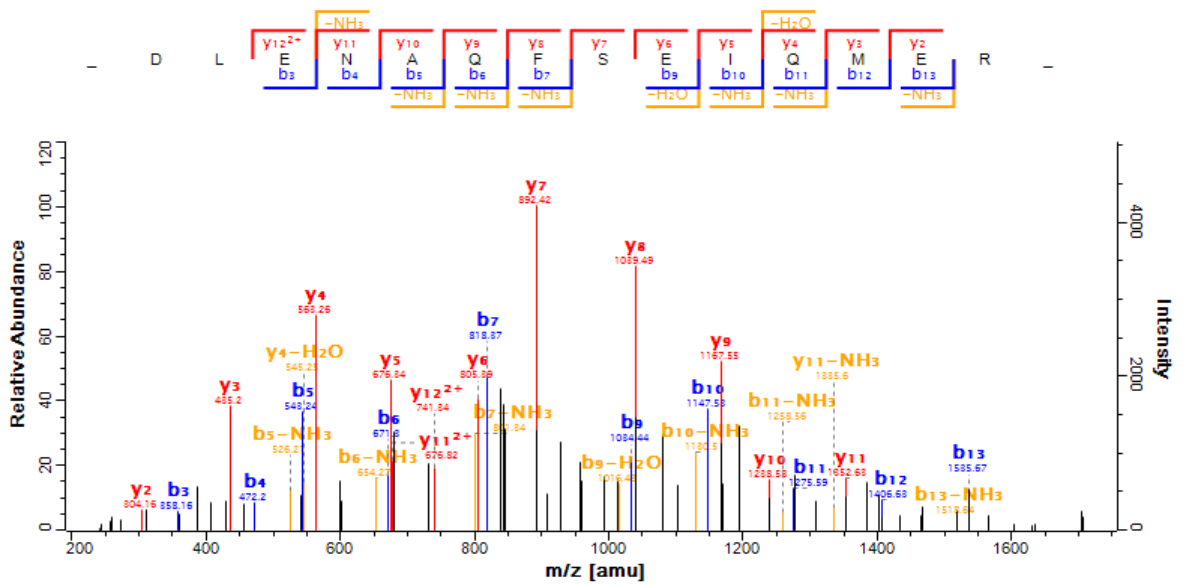



**Protein Group ID:** 3805  
**Protein Accession Numbers:** Q6Y1H2  
**Gene Names:** PTPLB  
**Peptide Sequence:** AAVAATAAAK  
**Total Number of Spectra:** 2  
**Number of Replicates (out of 8):** 2  
**Best Match Score:** 116.52  
**Best Match Posterior Error Probability:** 0.00027971  
**Best Match Spectrum:**

**Scan number** 18257      **Raw file** A549-US-WT-top20CID-Elite-2ug-B11  
**Method** ITMS; CID      **Genenames** PTPLB

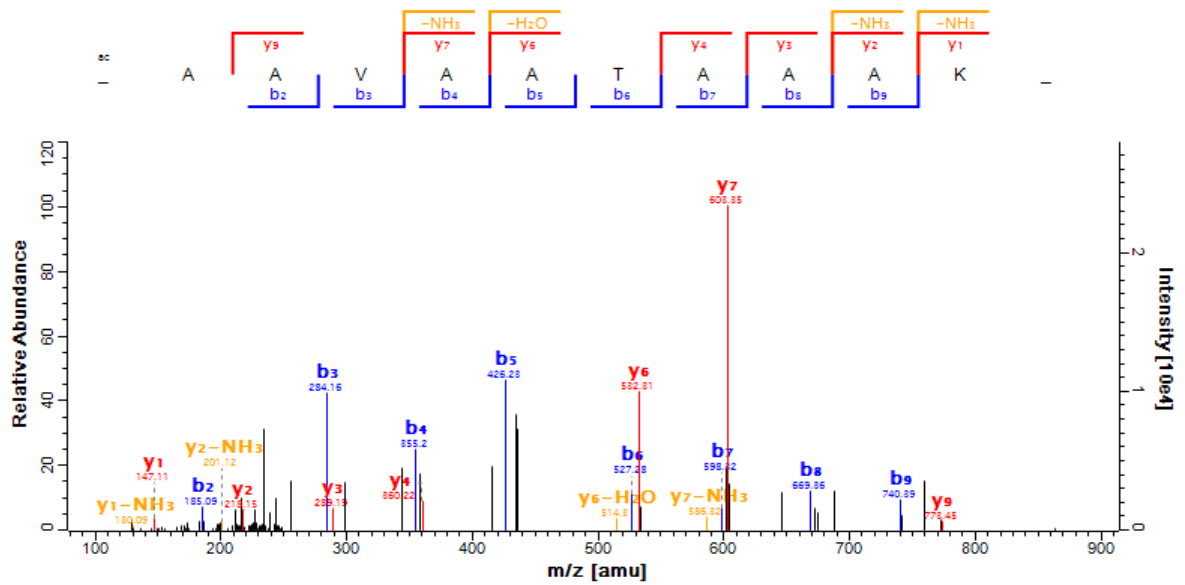

**Protein Group ID:** 3806  
**Protein Accession Numbers:** Q6Y288  
**Gene Names:** B3GALTL  
**Peptide Sequence:** QAADLTQELPSVLLQLAK  
**Total Number of Spectra:** 4  
**Number of Replicates (out of 8):** 4  
**Best Match Score:** 69.522  
**Best Match Posterior Error Probability:** 0.0020361  
**Best Match Spectrum:**

**Scan number** 79939      **Raw file** A549-US-WT-top20CID-Elite-2ug-B11  
**Method** ITMS; CID      **Genenames** B3GALTL

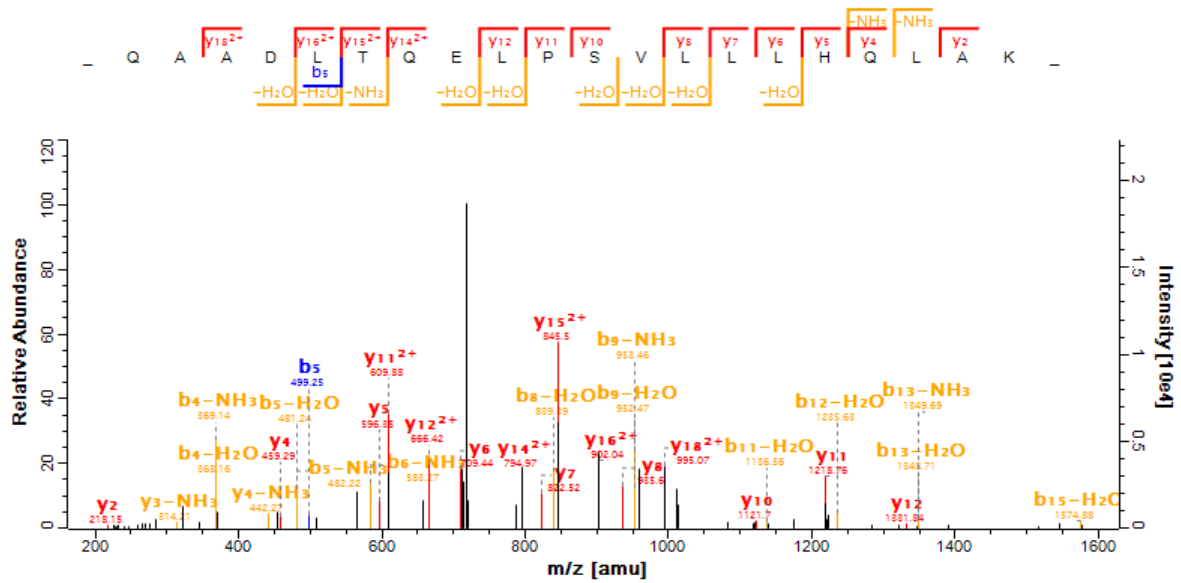

**Protein Group ID:** 3812  
**Protein Accession Numbers:** Q6ZMG9-2; Q6ZMG9  
**Gene Names:** CERS6  
**Peptide Sequence:** AGILAWFWNER  
**Total Number of Spectra:** 5  
**Number of Replicates (out of 8):** 5  
**Best Match Score:** 174.98  
**Best Match Posterior Error Probability:** 3.84E-23  
**Best Match Spectrum:**

**Scan number** 95859      **Raw file** A549-US-Mock-top20CID-Elite-2ug-B12  
**Method** ITMS; CID      **Genenames** CERS6

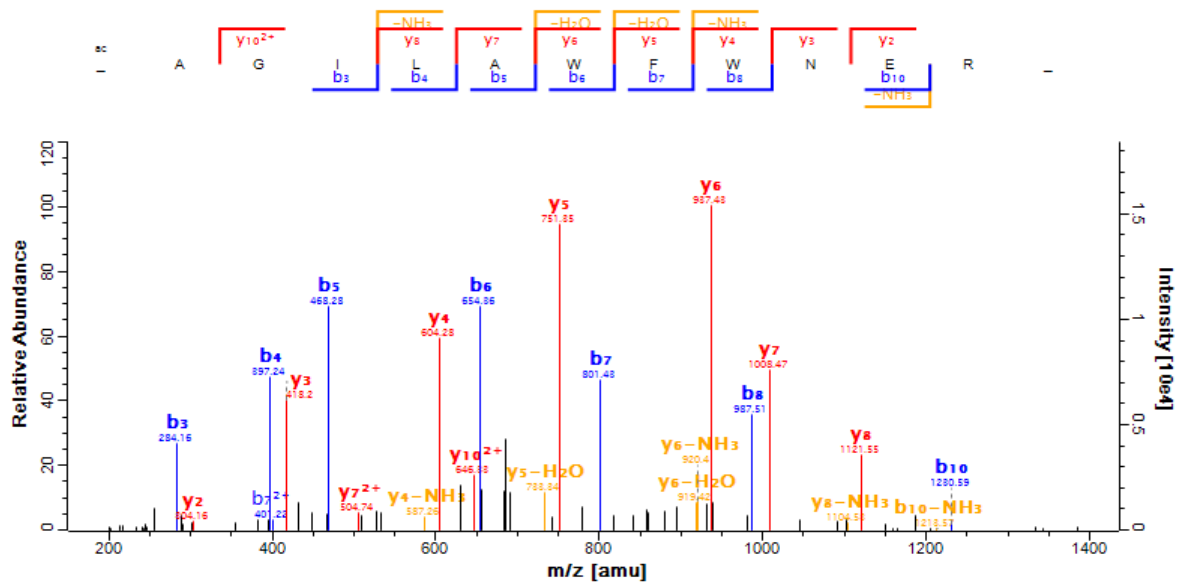

**Protein Group ID:** 3813

**Protein Accession Numbers:** Q6ZMI0; Q6ZMI0-2; Q6ZMI0-5; Q6ZMI0-3; Q6ZMI0-4

**Gene Names:** PPP1R21

**Peptide Sequence:** LATLETEAAQHQA VVDGLTR

**Total Number of Spectra:** 1

**Number of Replicates (out of 8):** 1

**Best Match Score:** 71.697

**Best Match Posterior Error Probability:** 0.0015803

**Best Match Spectrum:**

|                    |           |                  |                                   |
|--------------------|-----------|------------------|-----------------------------------|
| <b>Scan number</b> | 44933     | <b>Raw file</b>  | A549-US-WT-top20CID-Elite-2ug-B12 |
| <b>Method</b>      | ITMS; CID | <b>Genenames</b> | PPP1R21                           |

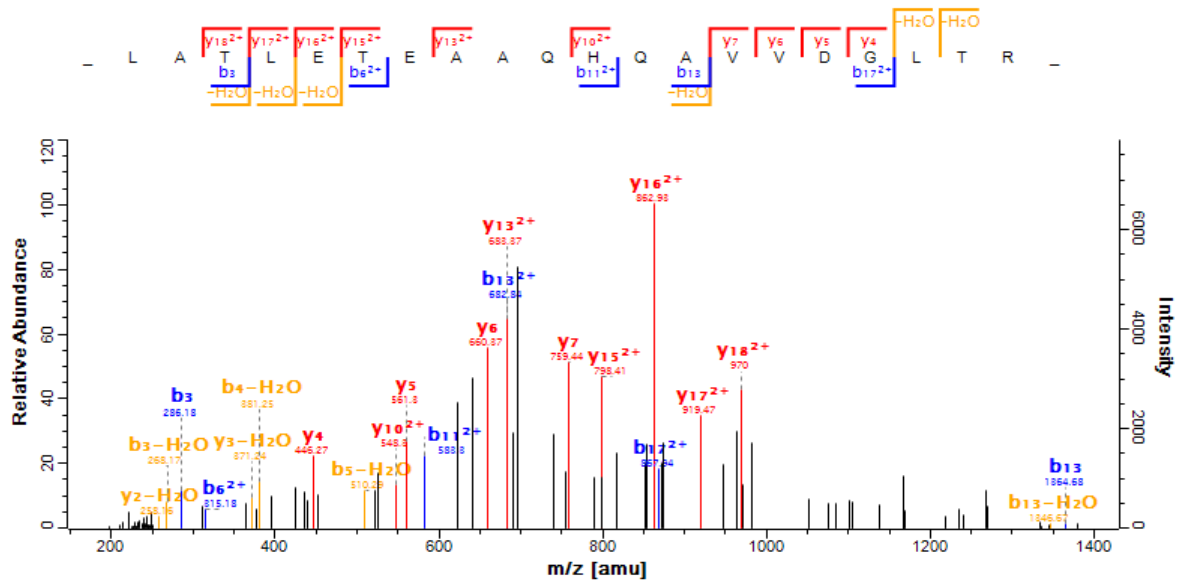

**Protein Group ID:** 3817  
**Protein Accession Numbers:** Q6ZSJ8  
**Gene Names:** Clorf122  
**Peptide Sequence:** AQQLLDAVEQR  
**Total Number of Spectra:** 6  
**Number of Replicates (out of 8):** 6  
**Best Match Score:** 131.13  
**Best Match Posterior Error Probability:** 4.19E-05  
**Best Match Spectrum:**

**Scan number** 34388      **Raw file** A549-US-Mock-top20CID-Elite-2ug-B13  
**Method** ITMS; CID      **Genenames** Clorf122

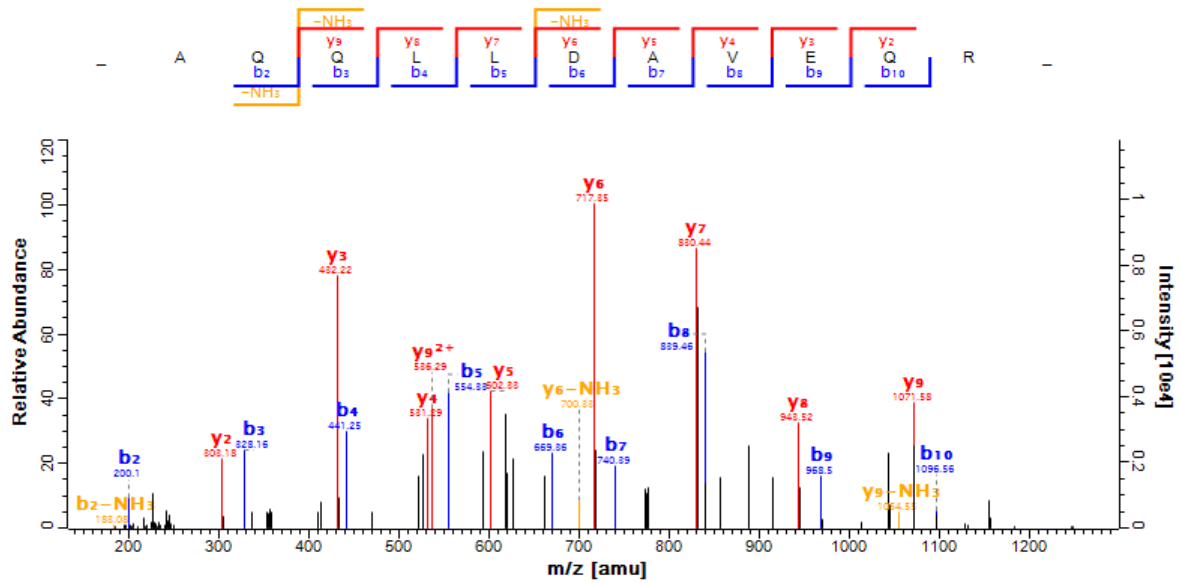

**Protein Group ID:** 3819

**Protein Accession Numbers:** Q6ZT12-4; Q6ZT12

**Gene Names:** UBR3

**Peptide Sequence:** AAAAAAVGGQQPSQPELPAPGLALDK

**Total Number of Spectra:** 2

**Number of Replicates (out of 8):** 2

**Best Match Score:** 100.76

**Best Match Posterior Error Probability:** 9.22E-08

**Best Match Spectrum:**

**Scan number** 64893      **Raw file** A549-US-WT-top20CID-Elite-2ug-B12  
**Method** ITMS; CID      **Genenames** UBR3

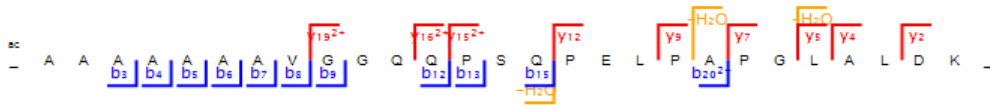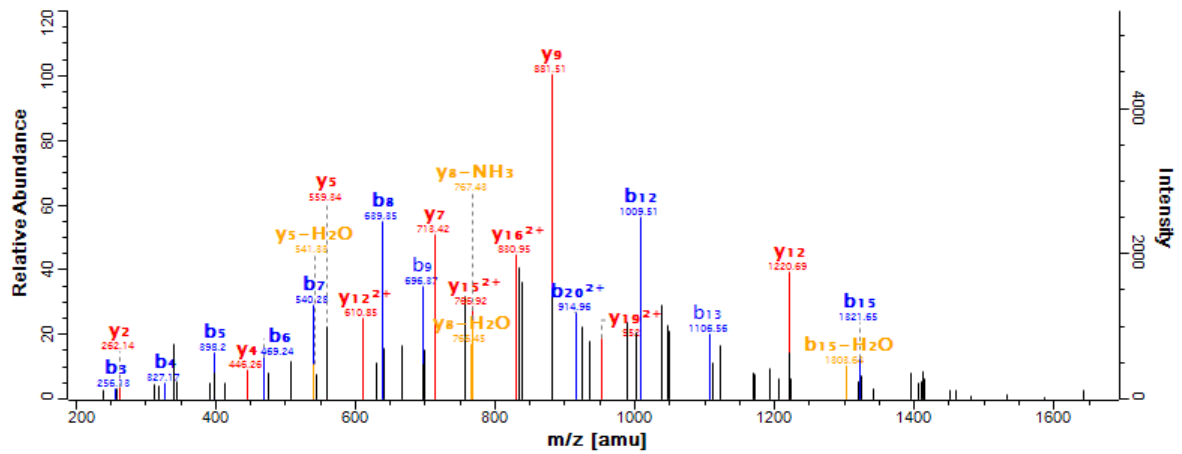

**Protein Group ID:** 3820

**Protein Accession Numbers:** Q6ZUT1-2; Q6ZUT1; Q6ZUT1-3

**Gene Names:** C11orf57

**Peptide Sequence:** AHTSVANNEIQER

**Total Number of Spectra:** 1

**Number of Replicates (out of 8):** 1

**Best Match Score:** 88.552

**Best Match Posterior Error Probability:** 0.0015422

**Best Match Spectrum:**

**Scan number** 6828      **Raw file** A549-US-WT-top20CID-Elite-2ug-B11  
**Method** ITMS; CID      **Genenames** C11orf57

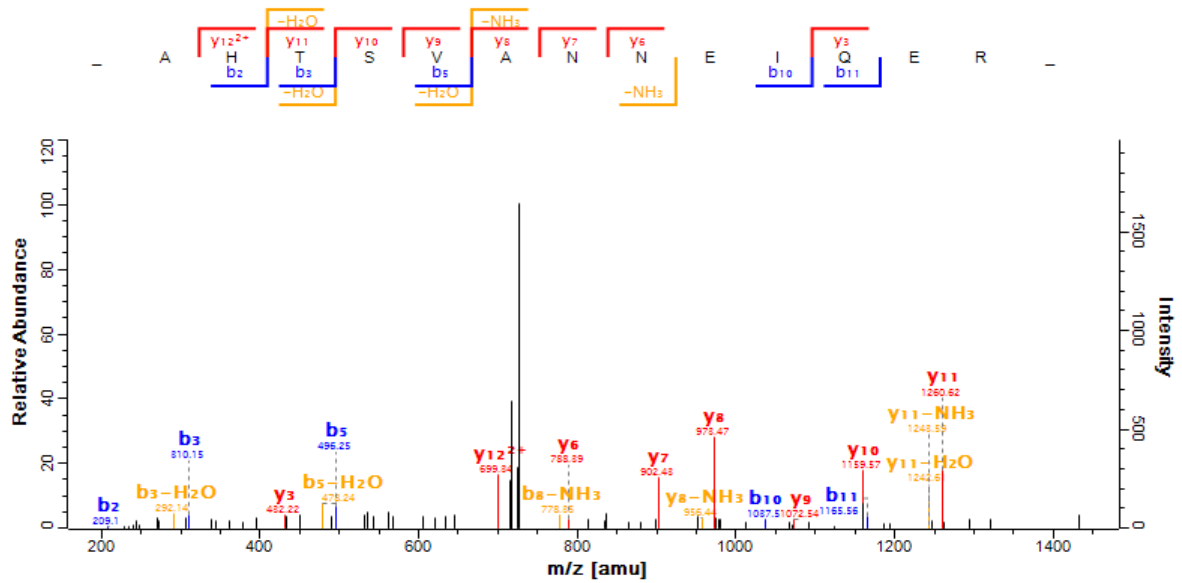

**Protein Group ID:** 3831

**Protein Accession Numbers:** Q71DI3

**Gene Names:** HIST2H3A

**Peptide Sequence:** FQSSAVMALQEASEAYLVGLFEDTNLCAIHAK

**Total Number of Spectra:** 22

**Number of Replicates (out of 8):** 7

**Best Match Score:** 149.99

**Best Match Posterior Error Probability:** 4.76E-43

**Best Match Spectrum:**

**Scan number** 94242      **Raw file** A549-US-WT-top20CID-Elite-2ug-B14  
**Method** ITMS; CID      **Genenames** HIST2H3A

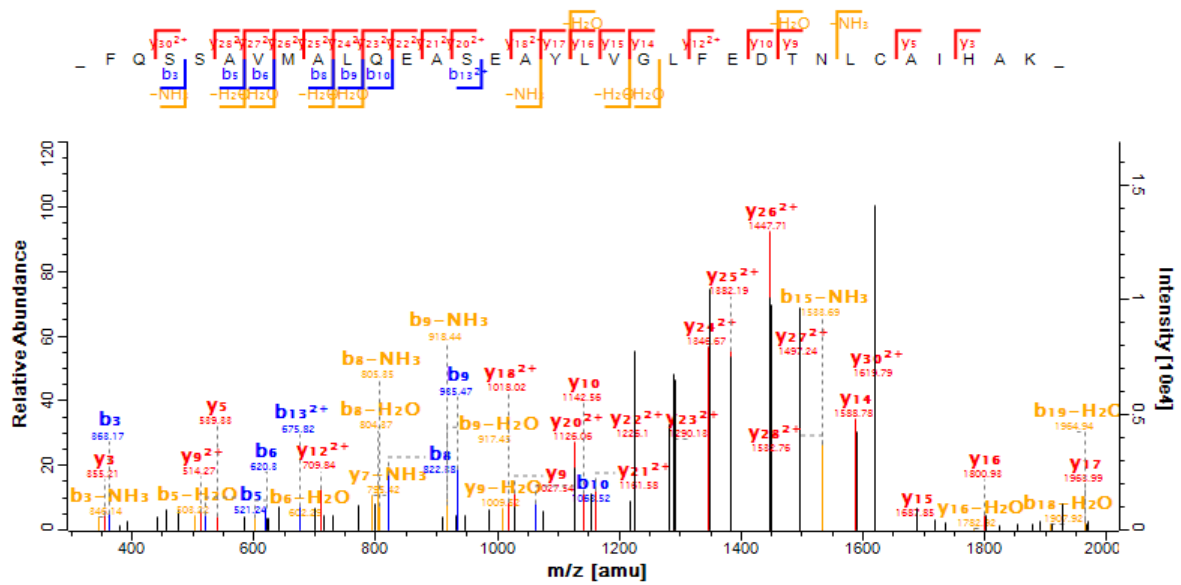



**Protein Group ID:** 3833

**Protein Accession Numbers:** Q71U36; G3V1U9; Q13748; F8VXZ4; Q6PEY2; Q13748-2; F8VQQ4

**Gene Names:** TUBA1A;TUBA3C;TUBA3E

**Peptide Sequence:** LIGQIVSSITASLR

**Total Number of Spectra:** 16

**Number of Replicates (out of 8):** 8

**Best Match Score:** 245.4

**Best Match Posterior Error Probability:** 7.58E-66

**Best Match Spectrum:**

|                    |           |                  |                                   |
|--------------------|-----------|------------------|-----------------------------------|
| <b>Scan number</b> | 81769     | <b>Raw file</b>  | A549-US-WT-top20CID-Elite-2ug-B12 |
| <b>Method</b>      | ITMS: CID | <b>Genenames</b> | TUBA1A;TUBA3C;TUBA3E              |

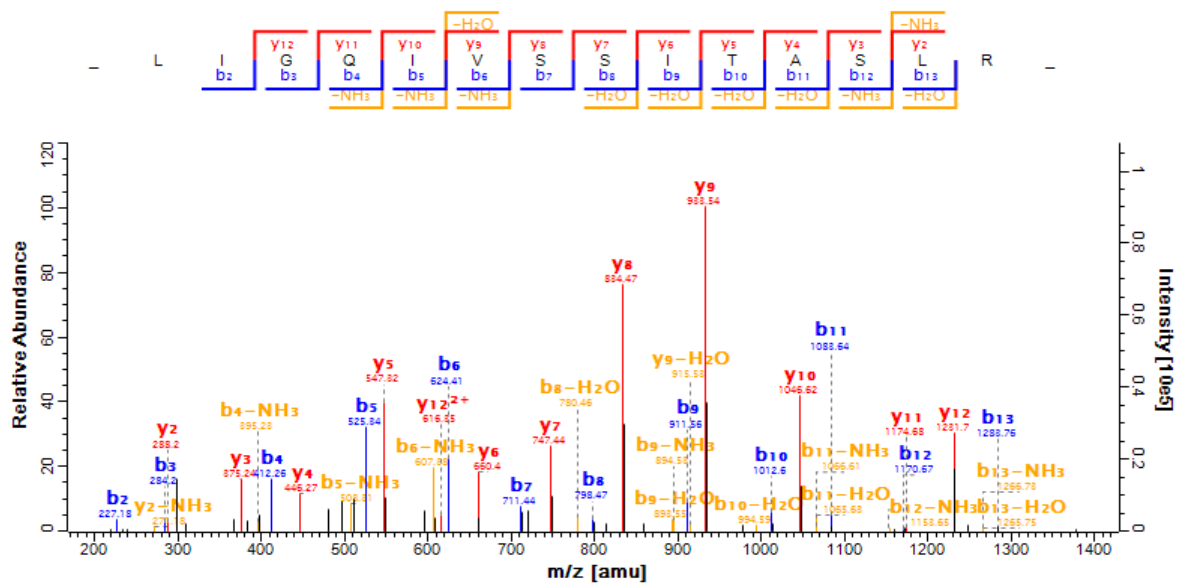

**Protein Group ID:** 3835  
**Protein Accession Numbers:** Q75MW2  
**Gene Names:** ZNF767  
**Peptide Sequence:** SPATGALTPR  
**Total Number of Spectra:** 1  
**Number of Replicates (out of 8):** 1  
**Best Match Score:** 83.862  
**Best Match Posterior Error Probability:** 0.0027723  
**Best Match Spectrum:**

**Scan number** 17873      **Raw file** A549-US-WT-top20CID-Elite-2ug-B13  
**Method** ITMS; CID      **Genenames** ZNF767

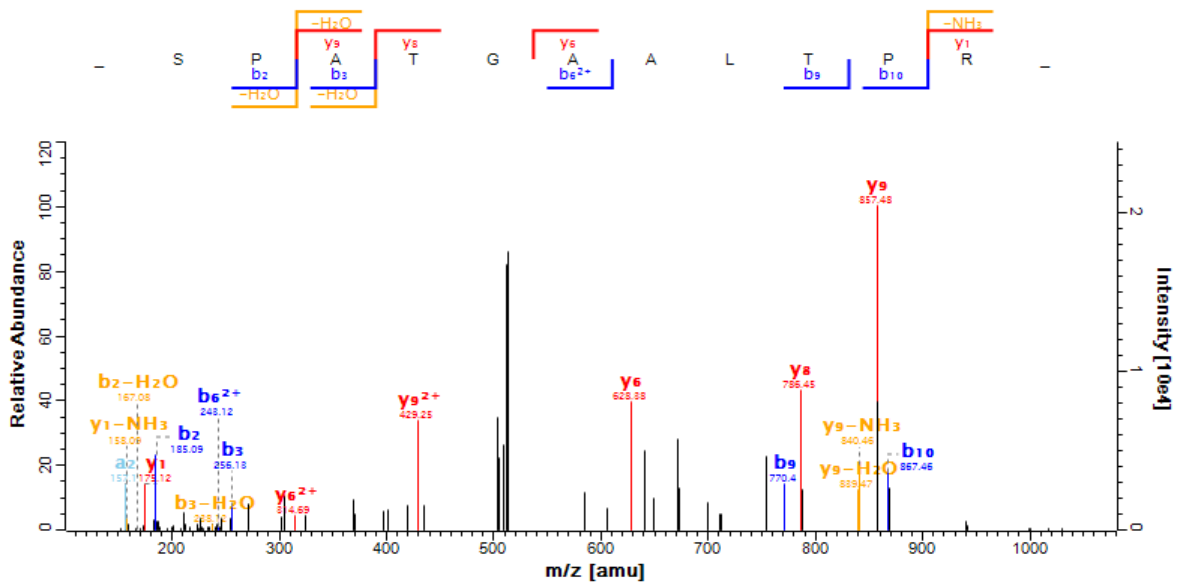

**Protein Group ID:** 3846  
**Protein Accession Numbers:** Q7L4I2; Q7L4I2-2  
**Gene Names:** RSRC2  
**Peptide Sequence:** SEDEAGCSSVDEESYK  
**Total Number of Spectra:** 9  
**Number of Replicates (out of 8):** 5  
**Best Match Score:** 160.8  
**Best Match Posterior Error Probability:** 1.63E-09  
**Best Match Spectrum:**

**Scan number** 13108      **Raw file** A549-US-WT-top20CID-Elite-2ug-B11  
**Method** ITMS; CID      **Genenames** RSRC2

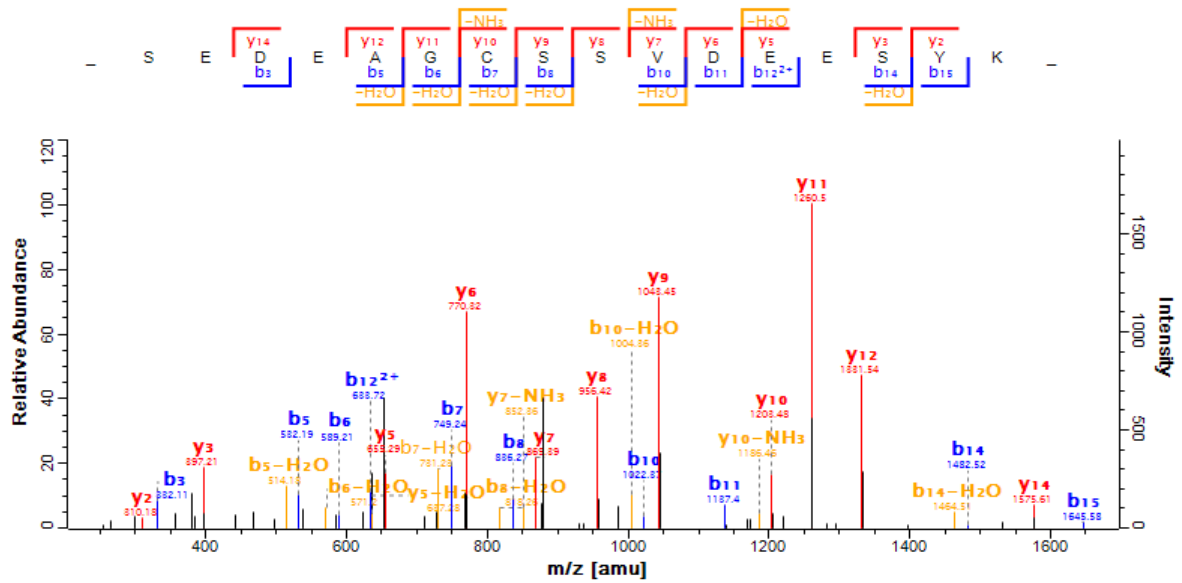

**Protein Group ID:** 3856  
**Protein Accession Numbers:** Q7LGC8  
**Gene Names:** CHST3  
**Peptide Sequence:** NTQAAHDGSGIYSTQK  
**Total Number of Spectra:** 6  
**Number of Replicates (out of 8):** 5  
**Best Match Score:** 115.56  
**Best Match Posterior Error Probability:** 9.67E-05  
**Best Match Spectrum:**

**Scan number** 6415      **Raw file** A549-US-WT-top20CID-Elite-2ug-B13  
**Method** ITMS; CID      **Genenames** CHST3

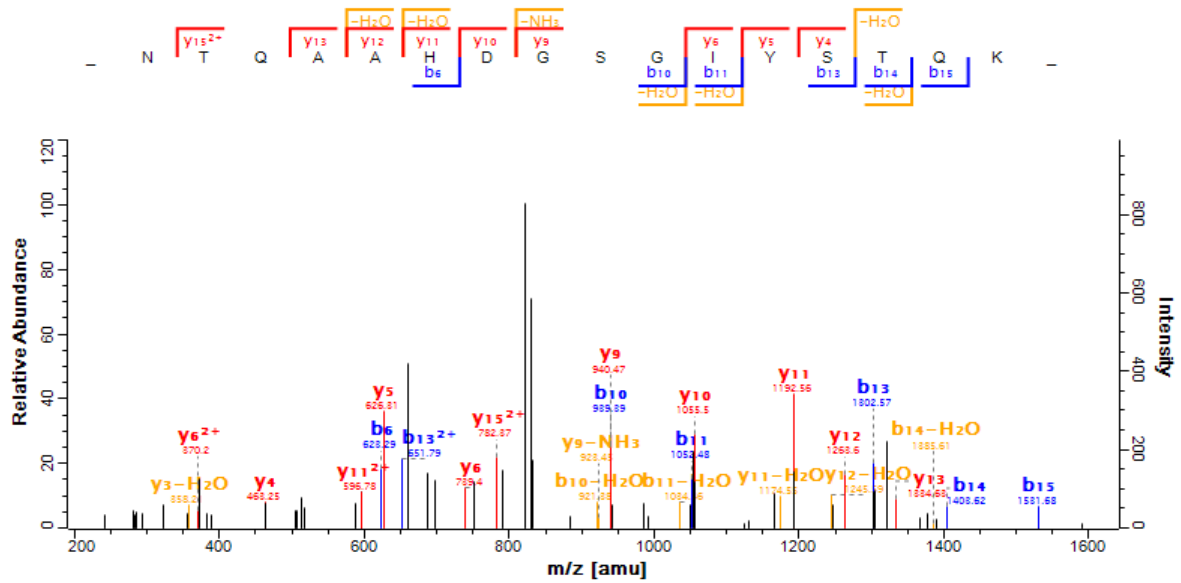

**Protein Group ID:** 3857  
**Protein Accession Numbers:** Q7RTP6  
**Gene Names:** MICAL3  
**Peptide Sequence:** TSTPLAPLVQSQSDTK  
**Total Number of Spectra:** 1  
**Number of Replicates (out of 8):** 1  
**Best Match Score:** 77.746  
**Best Match Posterior Error Probability:** 0.0019188  
**Best Match Spectrum:**

**Scan number** 36048      **Raw file** A549-US-WT-top20CID-Elite-2ug-B12  
**Method** ITMS; CID      **Genenames** MICAL3

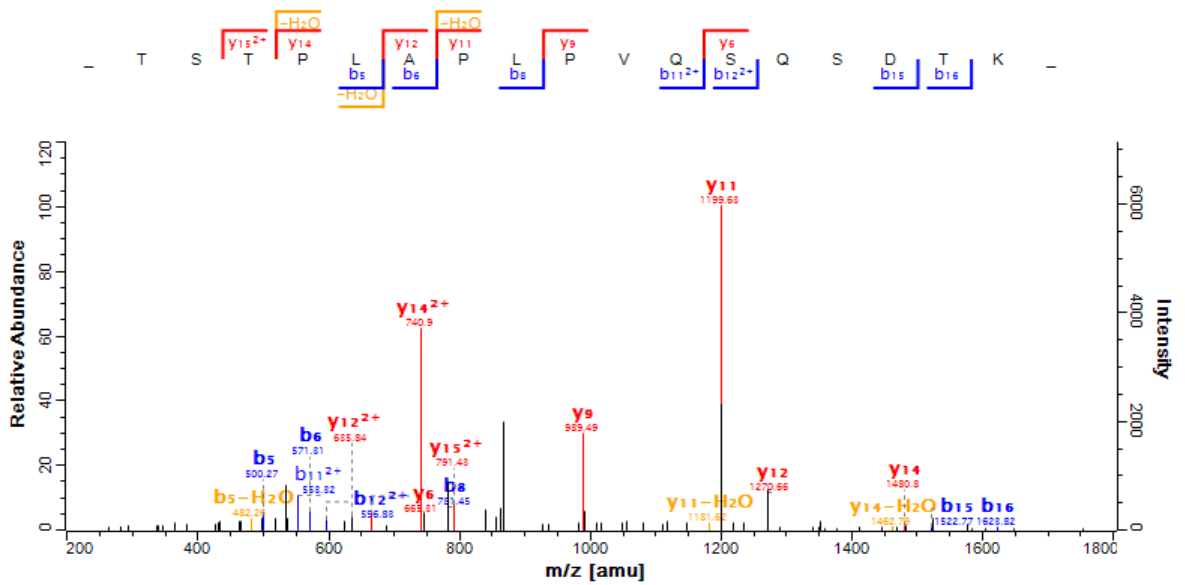

**Protein Group ID:** 3859  
**Protein Accession Numbers:** Q7Z2K8  
**Gene Names:** GPRIN1  
**Peptide Sequence:** AEPVSSTEASSLGQK  
**Total Number of Spectra:** 2  
**Number of Replicates (out of 8):** 2  
**Best Match Score:** 91.307  
**Best Match Posterior Error Probability:** 0.0007303  
**Best Match Spectrum:**

**Scan number** 16896      **Raw file** A549-US-WT-top20CID-Elite-2ug-B14  
**Method** ITMS; CID      **Genenames** GPRIN1

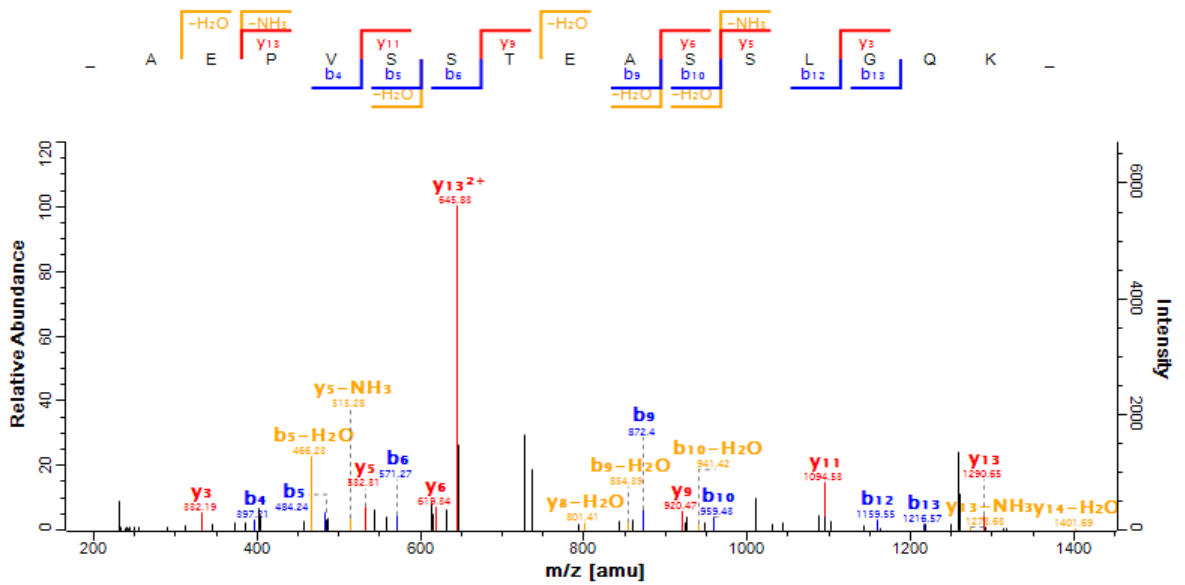

**Protein Group ID:** 3871  
**Protein Accession Numbers:** Q7Z4F1  
**Gene Names:** LRP10  
**Peptide Sequence:** EGGAVGGQDGEQAPPLIK  
**Total Number of Spectra:** 1  
**Number of Replicates (out of 8):** 1  
**Best Match Score:** 136.39  
**Best Match Posterior Error Probability:** 2.17E-11  
**Best Match Spectrum:**

**Scan number** 36550      **Raw file** A549-US-WT-top20CID-Elite-2ug-B12  
**Method** ITMS; CID      **Genenames** LRP10

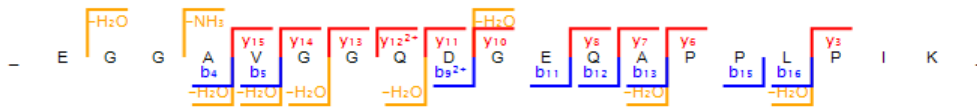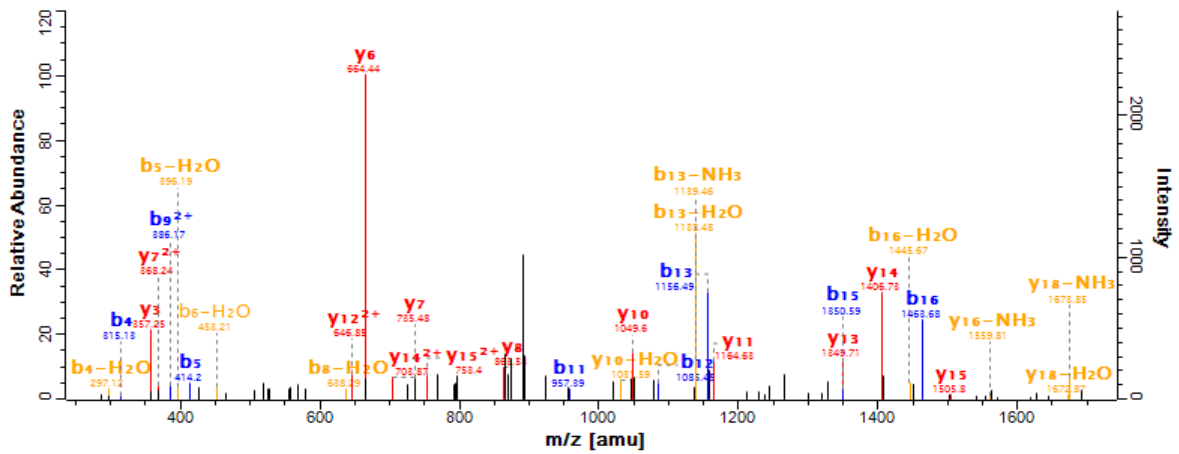

**Protein Group ID:** 3878  
**Protein Accession Numbers:** Q7Z6J0; Q7Z6J0-3  
**Gene Names:** SH3RF1  
**Peptide Sequence:** DLQSSQGGQQPR  
**Total Number of Spectra:** 6  
**Number of Replicates (out of 8):** 6  
**Best Match Score:** 132.5  
**Best Match Posterior Error Probability:** 9.89E-05  
**Best Match Spectrum:**

**Scan number** 3616      **Raw file** A549-US-WT-top20CID-Elite-2ug-B14  
**Method** ITMS; CID      **Genenames** SH3RF1

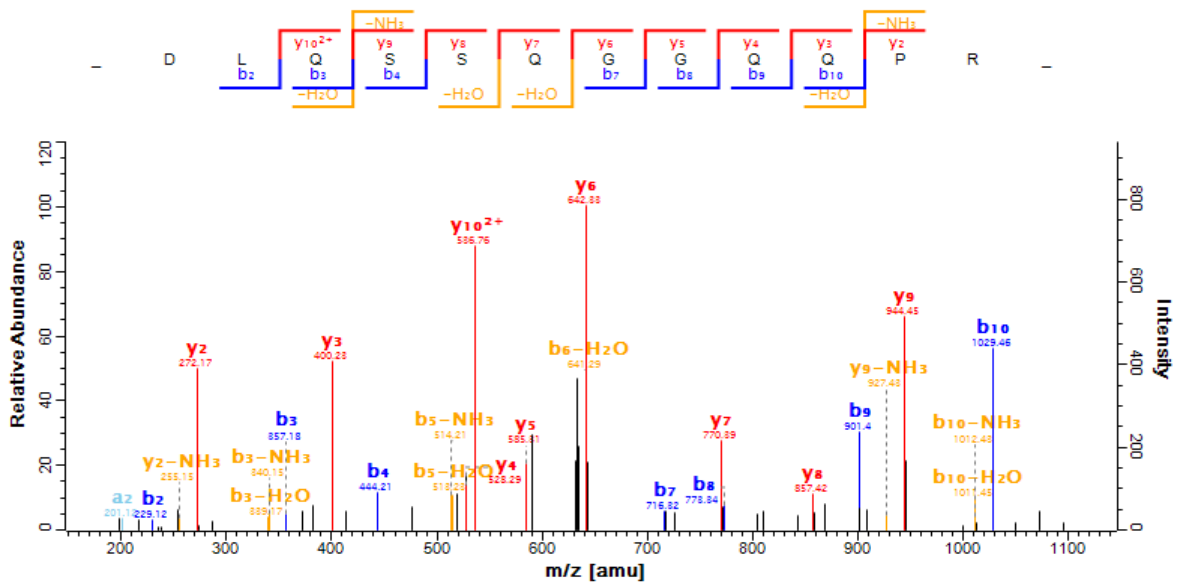



**Protein Group ID:** 3889  
**Protein Accession Numbers:** Q7Z7N9  
**Gene Names:** TMEM179B  
**Peptide Sequence:** GDPEWSSETDALVGSR  
**Total Number of Spectra:** 9  
**Number of Replicates (out of 8):** 8  
**Best Match Score:** 181.51  
**Best Match Posterior Error Probability:** 2.43E-20  
**Best Match Spectrum:**

**Scan number** 43647      **Raw file** A549-US-Mock-top20CID-Elite-2ug-B11  
**Method** ITMS; CID      **Genenames** TMEM179B

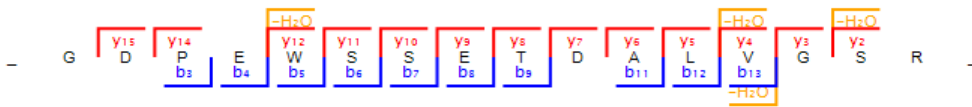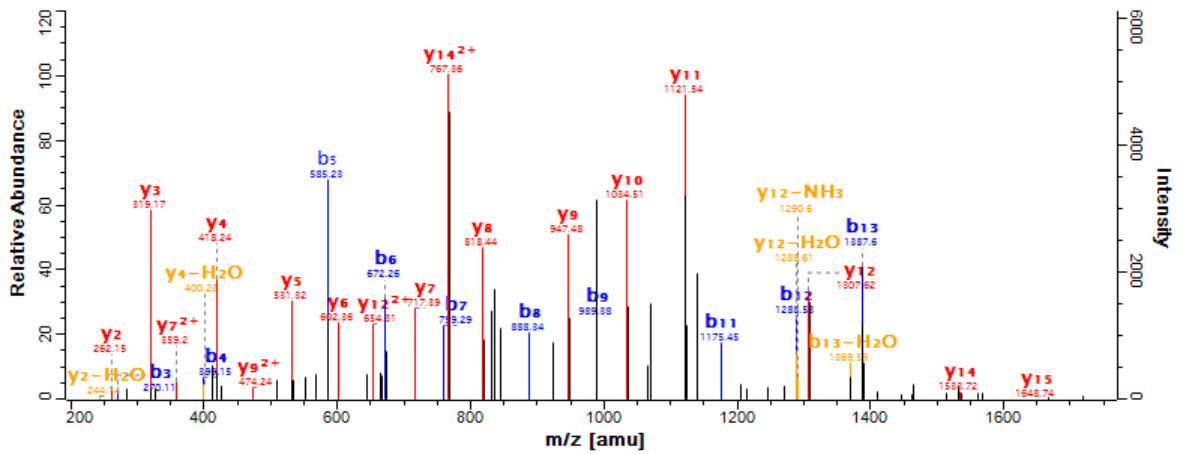

**Protein Group ID:** 3902  
**Protein Accession Numbers:** Q86TX2; G3V4F2  
**Gene Names:** ACOT1  
**Peptide Sequence:** AATLILEPAGR  
**Total Number of Spectra:** 3  
**Number of Replicates (out of 8):** 3  
**Best Match Score:** 138.25  
**Best Match Posterior Error Probability:** 2.90E-05  
**Best Match Spectrum:**

**Scan number** 33652      **Raw file** A549-US-Mock-top20CID-Elite-2ug-B11  
**Method** ITMS; CID      **Genenames** ACOT1

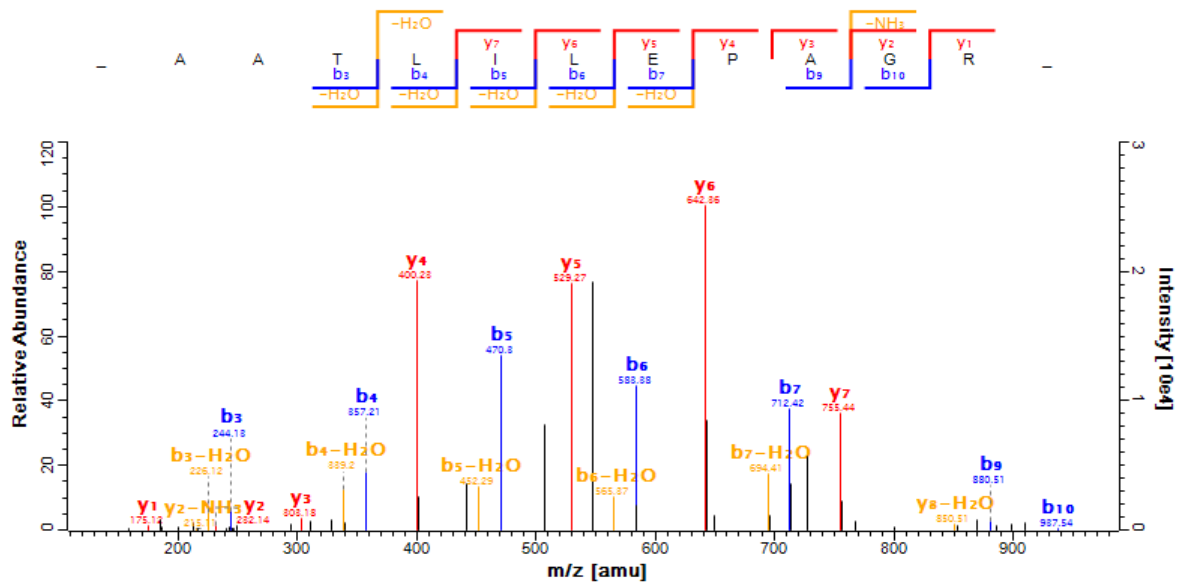

**Protein Group ID:** 3903  
**Protein Accession Numbers:** Q86U28  
**Gene Names:** ISCA2  
**Peptide Sequence:** GAQVDFSQELIR  
**Total Number of Spectra:** 6  
**Number of Replicates (out of 8):** 6  
**Best Match Score:** 98.942  
**Best Match Posterior Error Probability:** 0.0005378  
**Best Match Spectrum:**

|                    |           |                  |                                     |
|--------------------|-----------|------------------|-------------------------------------|
| <b>Scan number</b> | 46133     | <b>Raw file</b>  | A549-US-Mock-top20CID-Elite-2ug-B13 |
| <b>Method</b>      | ITMS; CID | <b>Genenames</b> | ISCA2                               |

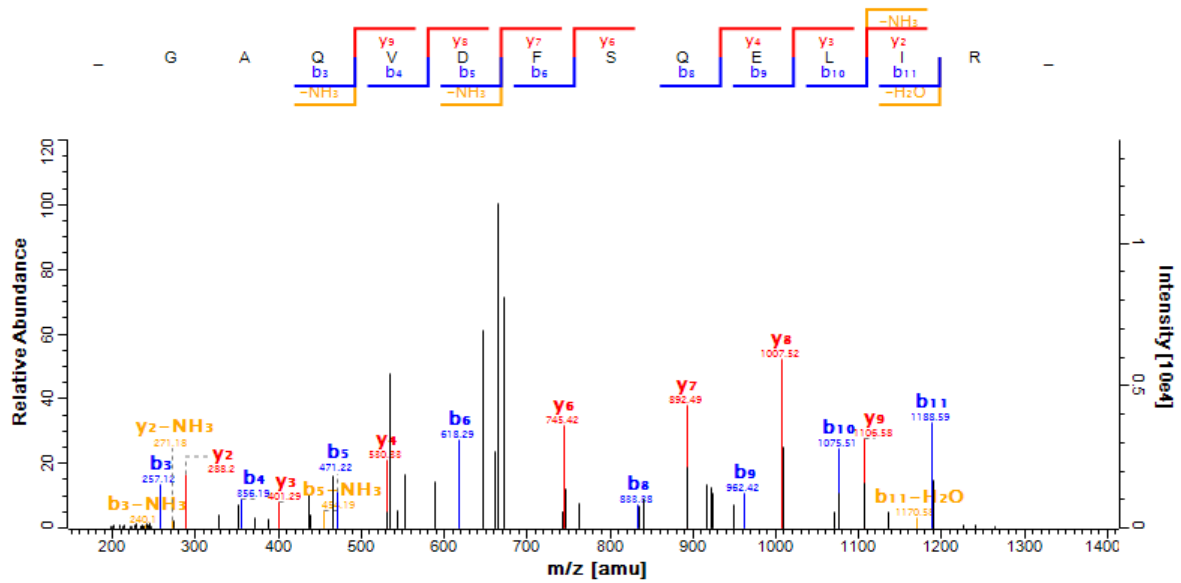

**Protein Group ID:** 3907  
**Protein Accession Numbers:** Q86U90  
**Gene Names:** YRDC  
**Peptide Sequence:** DLNPFTPLVGIR  
**Total Number of Spectra:** 2  
**Number of Replicates (out of 8):** 2  
**Best Match Score:** 112.43  
**Best Match Posterior Error Probability:** 0.00023058  
**Best Match Spectrum:**

**Scan number** 72157      **Raw file** A549-US-WT-top20CID-Elite-2ug-B13  
**Method** ITMS; CID      **Genenames** YRDC

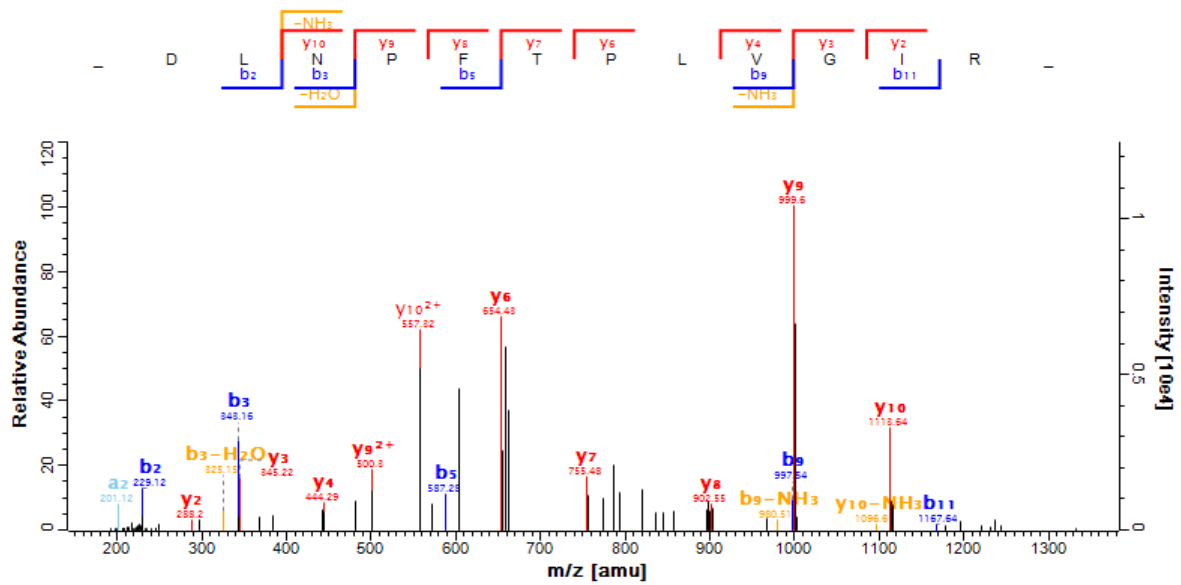

**Protein Group ID:** 3908  
**Protein Accession Numbers:** Q86UA1; Q86UA1-2  
**Gene Names:** PRPF39  
**Peptide Sequence:** LLNAYDEHQTLK  
**Total Number of Spectra:** 1  
**Number of Replicates (out of 8):** 1  
**Best Match Score:** 106.32  
**Best Match Posterior Error Probability:** 0.0024998  
**Best Match Spectrum:**

**Scan number** 36132      **Raw file** A549-US-Mock-top20CID-Elite-2ug-B13  
**Method** ITMS; CID      **Genenames** PRPF39

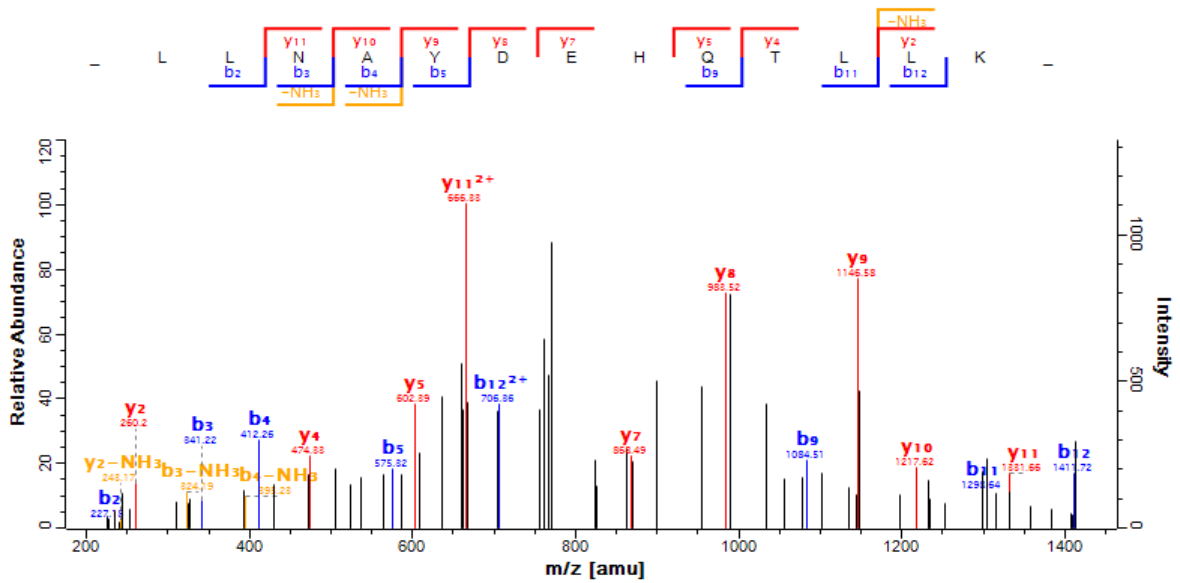

**Protein Group ID:** 3910

**Protein Accession Numbers:** Q86UF2; P0CG41; Q8IX94

**Gene Names:** CTAGE6P;CTAGE8;CTAGE4

**Peptide Sequence:** HSQQDELMADISK

**Total Number of Spectra:** 3

**Number of Replicates (out of 8):** 3

**Best Match Score:** 131.96

**Best Match Posterior Error Probability:** 4.57E-05

**Best Match Spectrum:**

**Scan number** 34950      **Raw file** A549-US-WT-top20CID-Elite-2ug-B11  
**Method** ITMS; CID      **Genenames** CTAGE6P;CTAGE8;CTAGE4

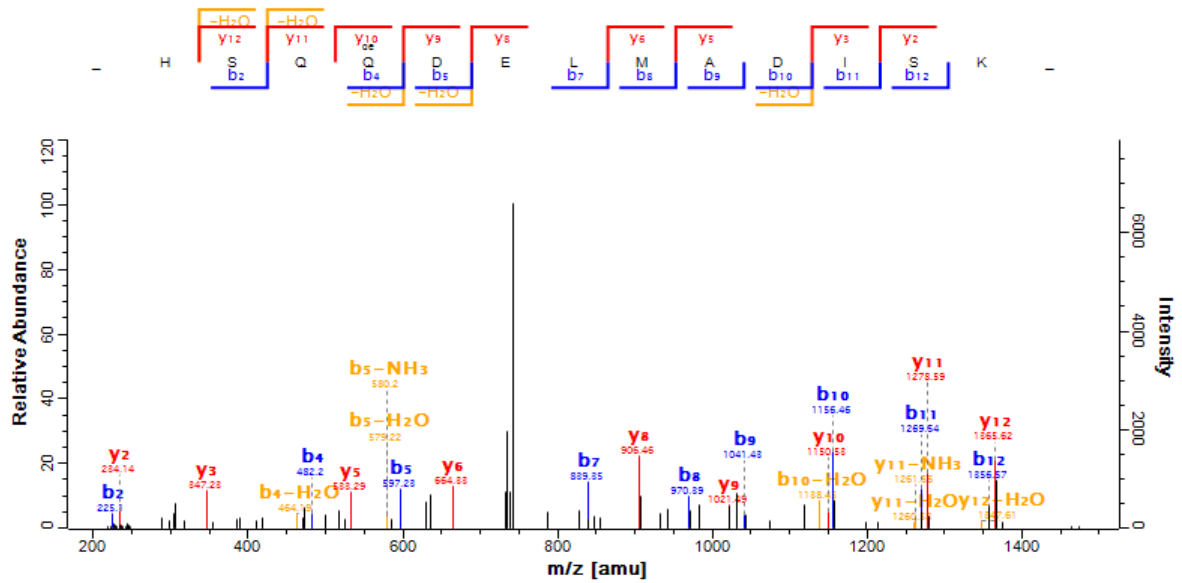

**Protein Group ID:** 3913  
**Protein Accession Numbers:** Q86US8  
**Gene Names:** SMG6  
**Peptide Sequence:** NLQQQELHR  
**Total Number of Spectra:** 2  
**Number of Replicates (out of 8):** 2  
**Best Match Score:** 106.2  
**Best Match Posterior Error Probability:** 0.0012843  
**Best Match Spectrum:**

**Scan number** 7061      **Raw file** A549-US-WT-top20CID-Elite-2ug-B11  
**Method** ITMS; CID      **Genenames** SMG6

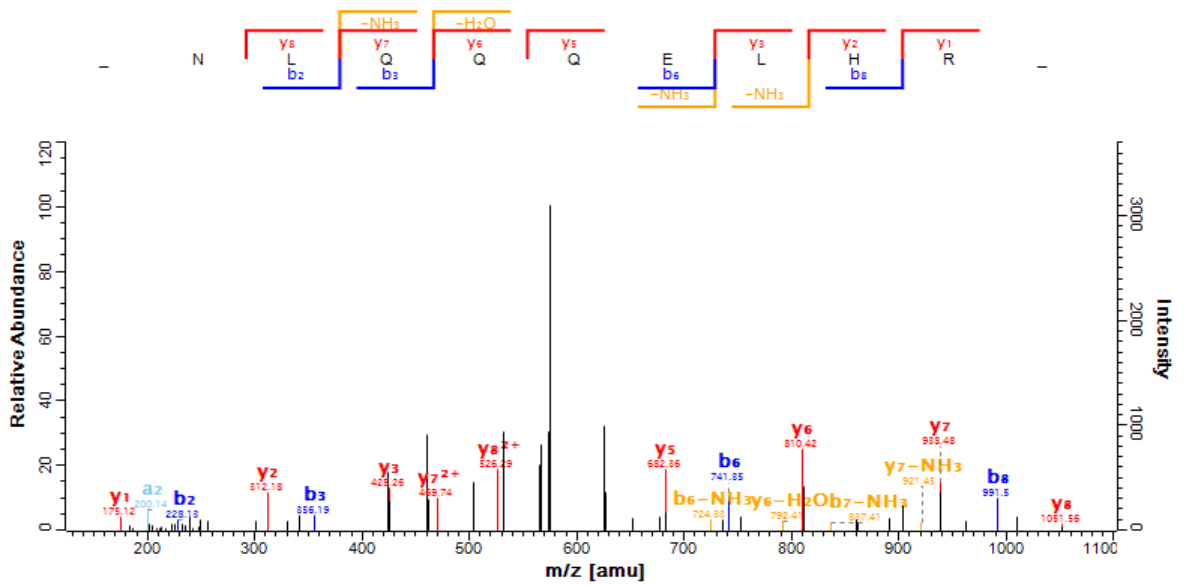

**Protein Group ID:** 3920  
**Protein Accession Numbers:** Q86V85  
**Gene Names:** GPR180  
**Peptide Sequence:** GSFSSSTAAQDAQGQR  
**Total Number of Spectra:** 4  
**Number of Replicates (out of 8):** 4  
**Best Match Score:** 112.24  
**Best Match Posterior Error Probability:** 0.00011237  
**Best Match Spectrum:**

**Scan number** 13821      **Raw file** A549-US-WT-top20CID-Elite-2ug-B12  
**Method** ITMS; CID      **Genenames** GPR180

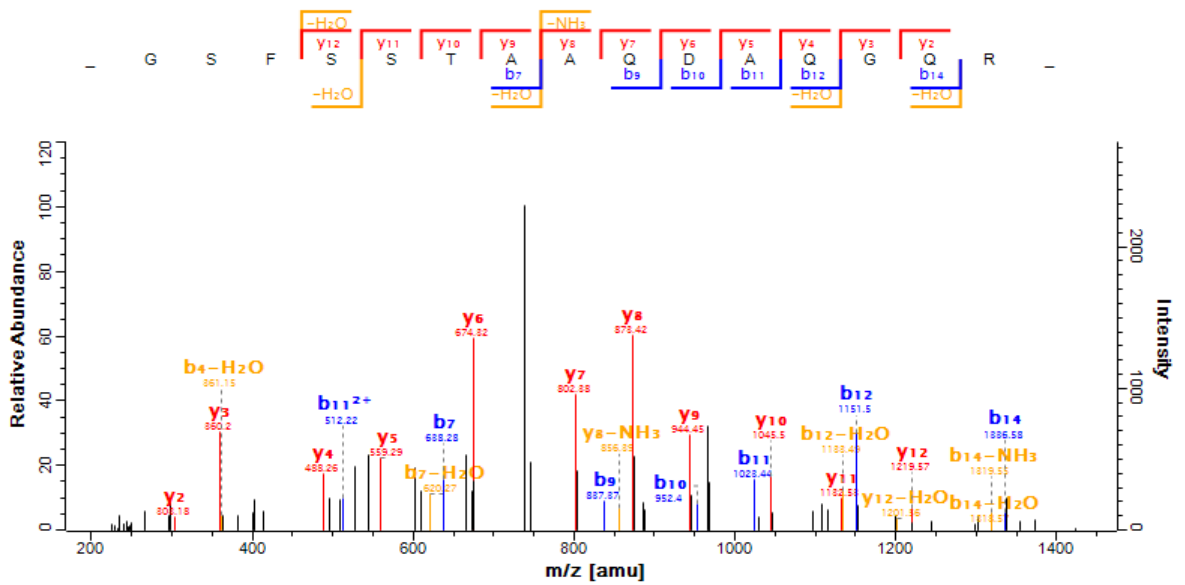



**Protein Group ID:** 3921

**Protein Accession Numbers:** Q86VF7-2; Q86VF7; Q86VF7-3; Q86VF7-4

**Gene Names:** NRAP

**Peptide Sequence:** GMGWVATGSLNVEQAKK

**Total Number of Spectra:** 1

**Number of Replicates (out of 8):** 1

**Best Match Score:** 88.282

**Best Match Posterior Error Probability:** 0.0011195

**Best Match Spectrum:**

|                    |           |                  |                                     |
|--------------------|-----------|------------------|-------------------------------------|
| <b>Scan number</b> | 69091     | <b>Raw file</b>  | A549-US-Mock-top20CID-Elite-2ug-B14 |
| <b>Method</b>      | ITMS; CID | <b>Genenames</b> | NRAP                                |

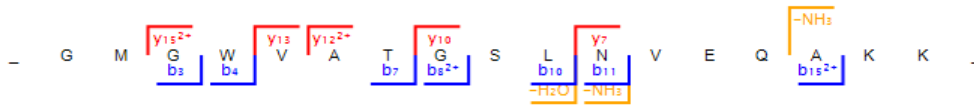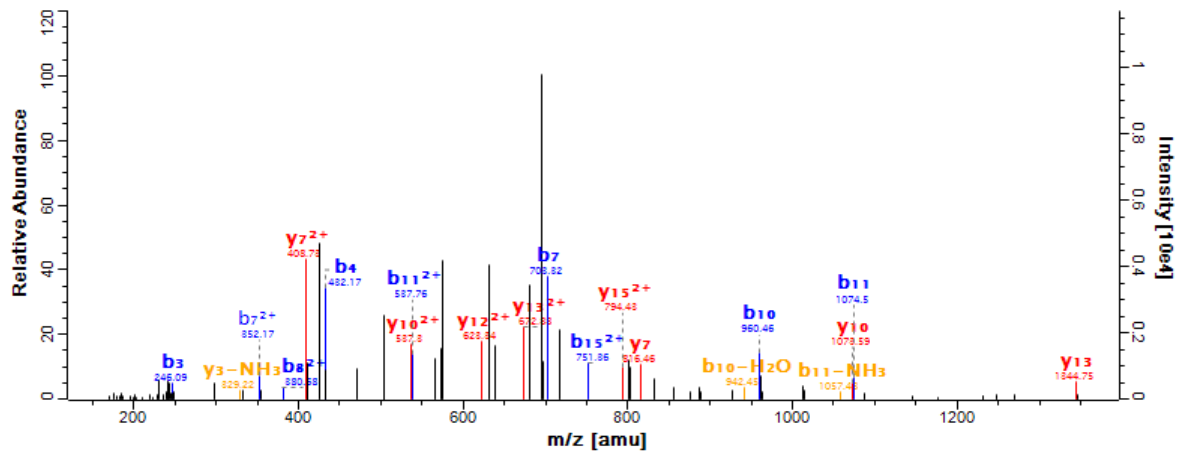



**Protein Group ID:** 3936

**Protein Accession Numbers:** Q92574; Q92574-2; Q86WV8

**Gene Names:** TSC1

**Peptide Sequence:** MAQQANVGELLAMLDSPLGVR

**Total Number of Spectra:** 1

**Number of Replicates (out of 8):** 1

**Best Match Score:** 69.122

**Best Match Posterior Error Probability:** 0.0050181

**Best Match Spectrum:**

|                    |           |                  |                                   |
|--------------------|-----------|------------------|-----------------------------------|
| <b>Scan number</b> | 95803     | <b>Raw file</b>  | A549-US-WT-top20CID-Elite-2ug-B13 |
| <b>Method</b>      | ITMS; CID | <b>Genenames</b> | TSC1                              |

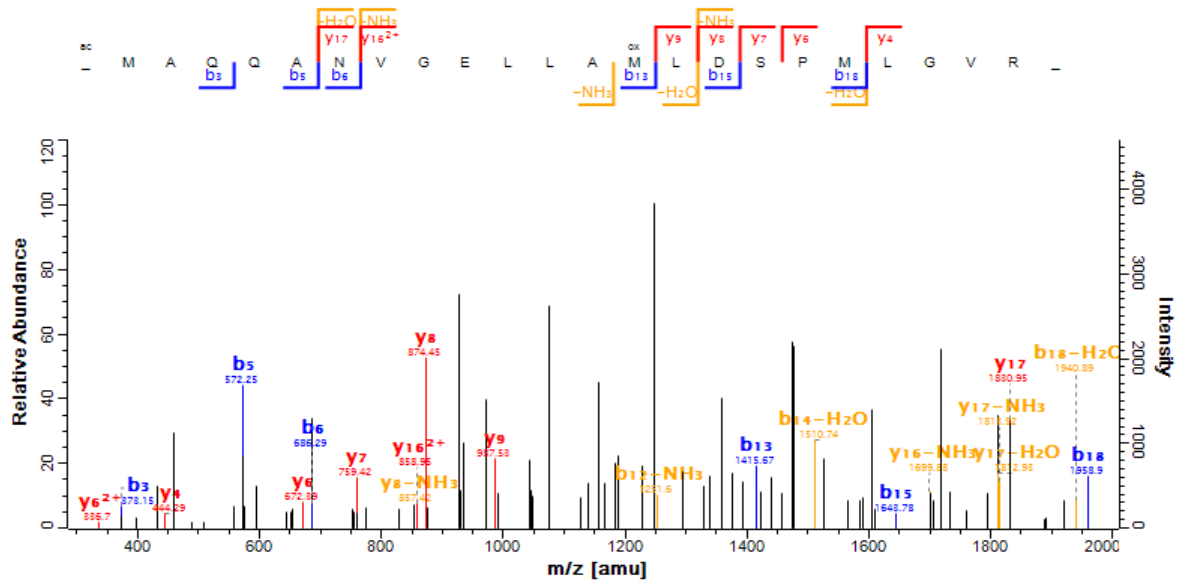

**Protein Group ID:** 3937  
**Protein Accession Numbers:** Q86X02  
**Gene Names:** CDR2L  
**Peptide Sequence:** LRVQELEELLEQAELQLQMK  
**Total Number of Spectra:** 3  
**Number of Replicates (out of 8):** 3  
**Best Match Score:** 103.79  
**Best Match Posterior Error Probability:** 0.00066185  
**Best Match Spectrum:**

**Scan number** 78136      **Raw file** A549-US-Mock-top20CID-Elite-2ug-B11  
**Method** ITMS; CID      **Genenames** CDR2L

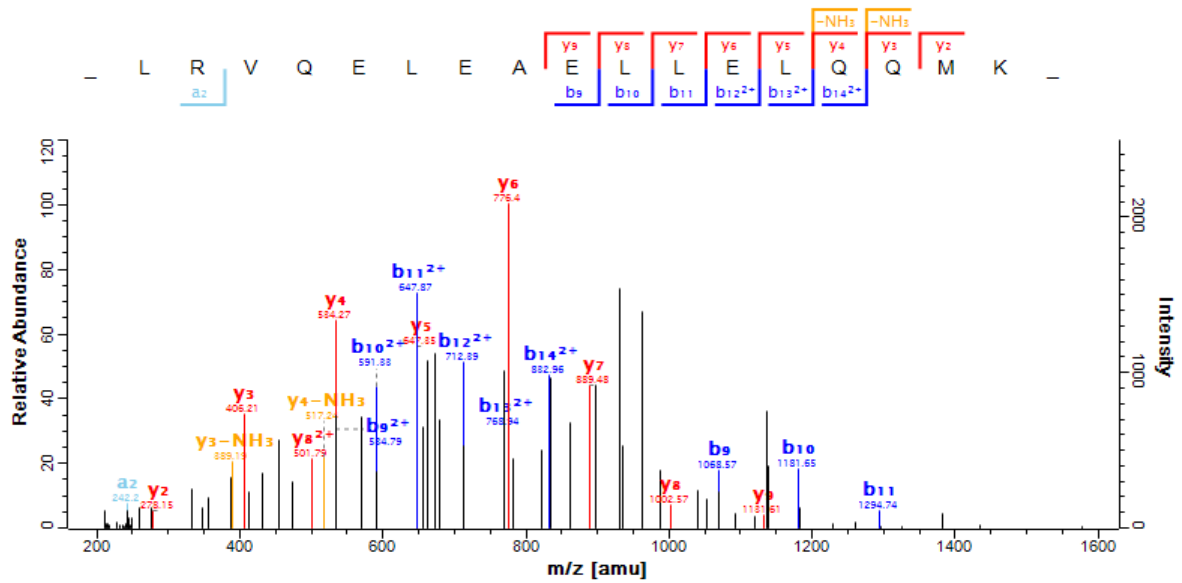

**Protein Group ID:** 3940

**Protein Accession Numbers:** Q86XK3-2; Q86XK3; Q86XK3-3

**Gene Names:** SFR1

**Peptide Sequence:** VESEENDQTFSEK

**Total Number of Spectra:** 1

**Number of Replicates (out of 8):** 1

**Best Match Score:** 83.204

**Best Match Posterior Error Probability:** 0.0025871

**Best Match Spectrum:**

**Scan number** 9832      **Raw file** A549-US-Mock-top20CID-Elite-2ug-B11  
**Method** ITMS; CID      **Genenames** SFR1

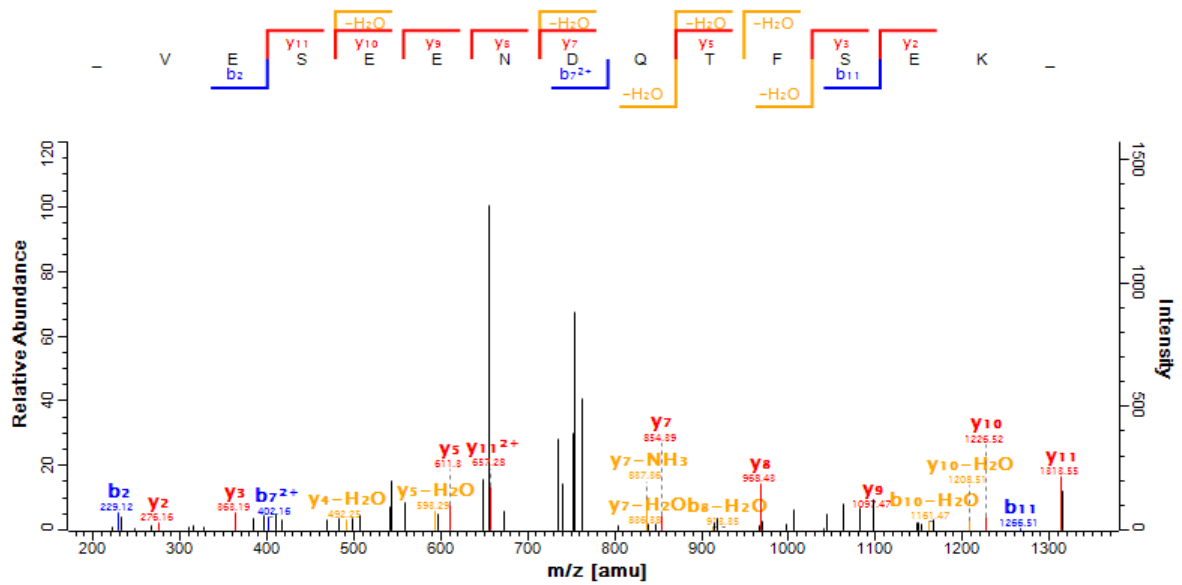

**Protein Group ID:** 3948

**Protein Accession Numbers:** Q86YL5-2; Q86YL5

**Gene Names:** C8orf42

**Peptide Sequence:** LALEDISADPEDTVGGHPSWSGWEDEDAK

**Total Number of Spectra:** 1

**Number of Replicates (out of 8):** 1

**Best Match Score:** 56.131

**Best Match Posterior Error Probability:** 0.001201

**Best Match Spectrum:**

|                    |           |                  |                                     |
|--------------------|-----------|------------------|-------------------------------------|
| <b>Scan number</b> | 64116     | <b>Raw file</b>  | A549-US-Mock-top20CID-Elite-2ug-B12 |
| <b>Method</b>      | ITMS; CID | <b>Genenames</b> | C8orf42                             |

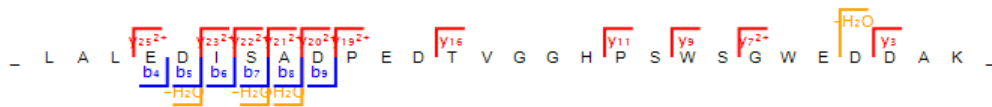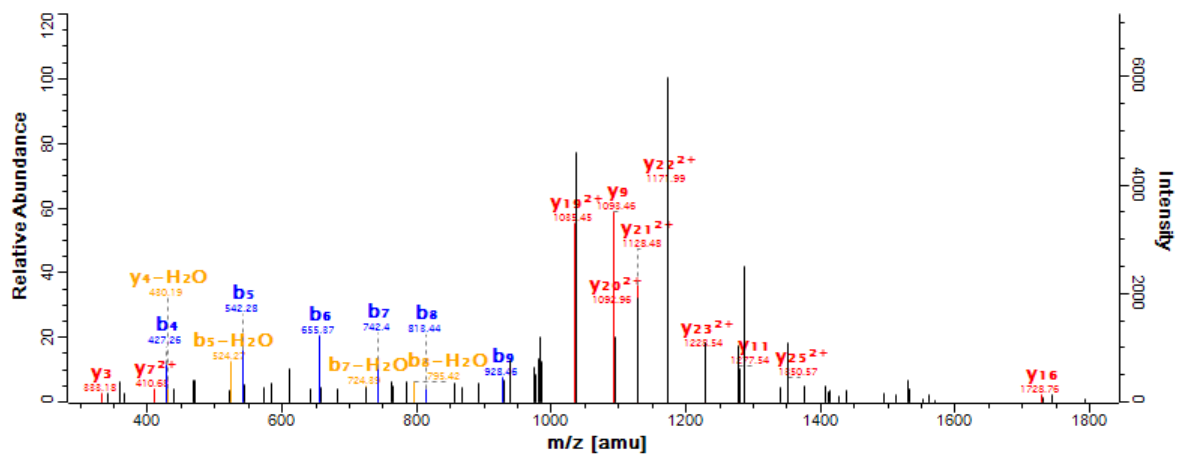

**Protein Group ID:** 3949  
**Protein Accession Numbers:** Q86YN1  
**Gene Names:** DOLPP1  
**Peptide Sequence:** IAAWPVSEFFLIR  
**Total Number of Spectra:** 2  
**Number of Replicates (out of 8):** 2  
**Best Match Score:** 103.88  
**Best Match Posterior Error Probability:** 0.00043764  
**Best Match Spectrum:**

**Scan number** 91594      **Raw file** A549-US-WT-top20CID-Elite-2ug-B13  
**Method** ITMS; CID      **Genenames** DOLPP1

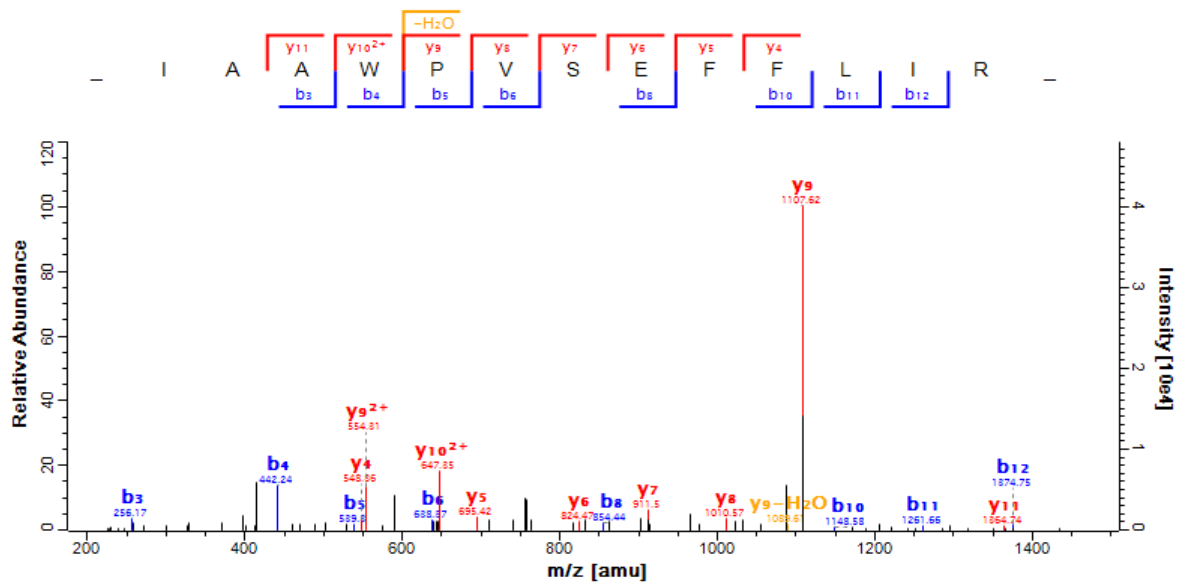

**Protein Group ID:** 3951

**Protein Accession Numbers:** Q86YV9

**Gene Names:** HPS6

**Peptide Sequence:** TYLPDEVGPPTPFPEPGAEPPLTVGLLK

**Total Number of Spectra:** 3

**Number of Replicates (out of 8):** 2

**Best Match Score:** 57.802

**Best Match Posterior Error Probability:** 0.0009891

**Best Match Spectrum:**

**Scan number** 84145      **Raw file** A549-US-WT-top20CID-Elite-2ug-B11  
**Method** ITMS; CID      **Genenames** HPS6

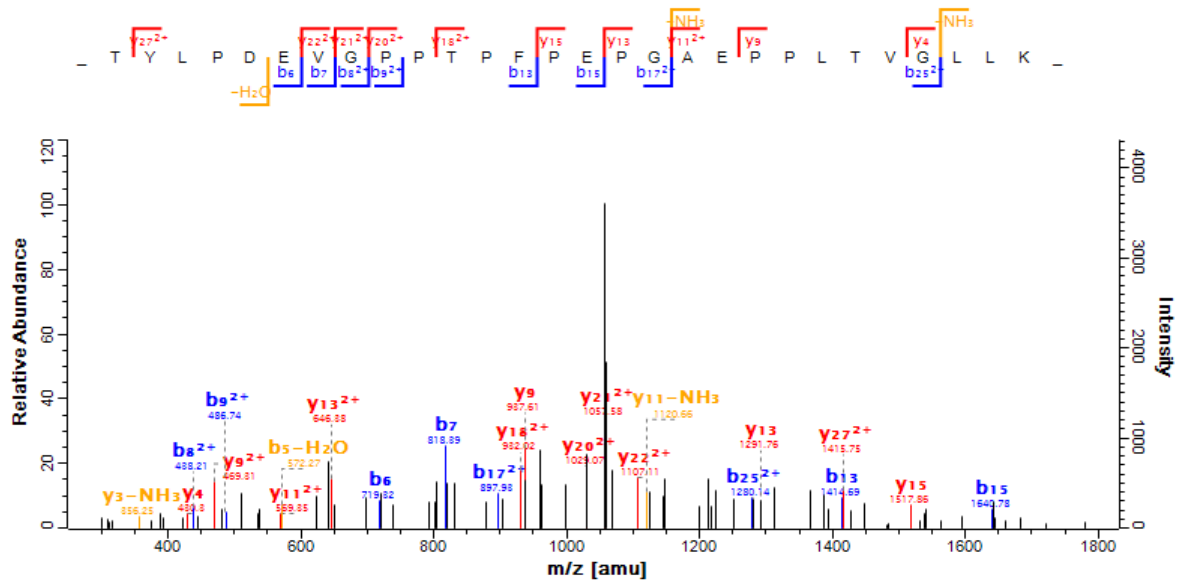



**Protein Group ID:** 3952  
**Protein Accession Numbers:** Q8IU54  
**Gene Names:** IL29  
**Peptide Sequence:** SLSPQELASFSFK  
**Total Number of Spectra:** 2  
**Number of Replicates (out of 8):** 2  
**Best Match Score:** 101.93  
**Best Match Posterior Error Probability:** 0.00044728  
**Best Match Spectrum:**

**Scan number** 44548      **Raw file** A549-US-WT-top20CID-Elite-2ug-B11  
**Method** ITMS; CID      **Genenames** IL29

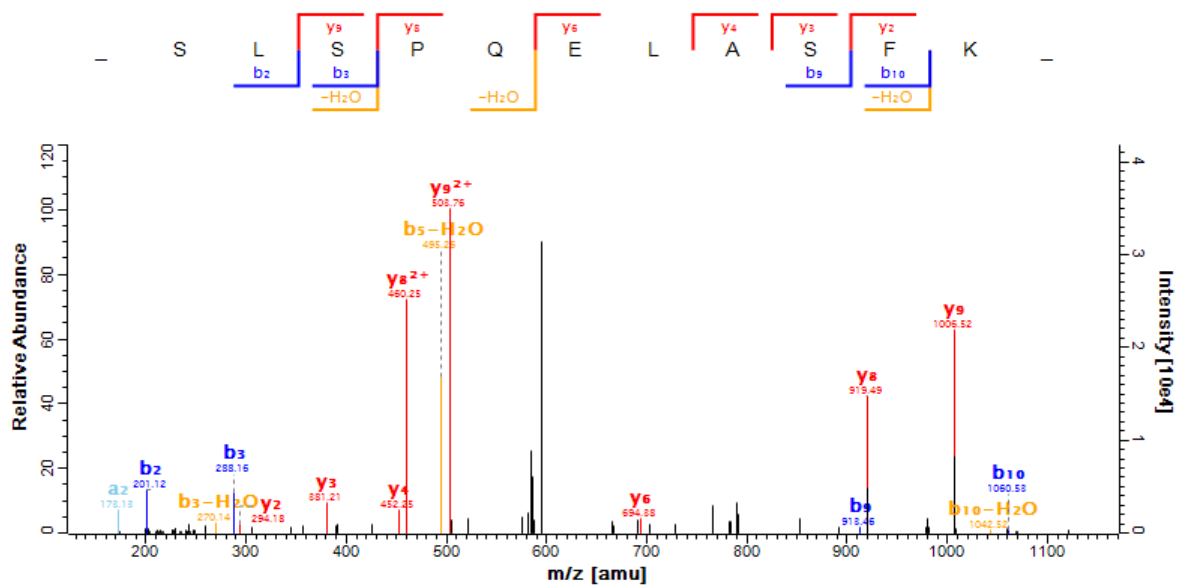

**Protein Group ID:** 3973  
**Protein Accession Numbers:** Q8IWT6  
**Gene Names:** LRRC8A  
**Peptide Sequence:** ALHLGNNVLQSLPSR  
**Total Number of Spectra:** 1  
**Number of Replicates (out of 8):** 1  
**Best Match Score:** 89.231  
**Best Match Posterior Error Probability:** 0.00087245  
**Best Match Spectrum:**

**Scan number** 47631      **Raw file** A549-US-Mock-top20CID-Elite-2ug-B14  
**Method** ITMS; CID      **Genenames** LRRC8A

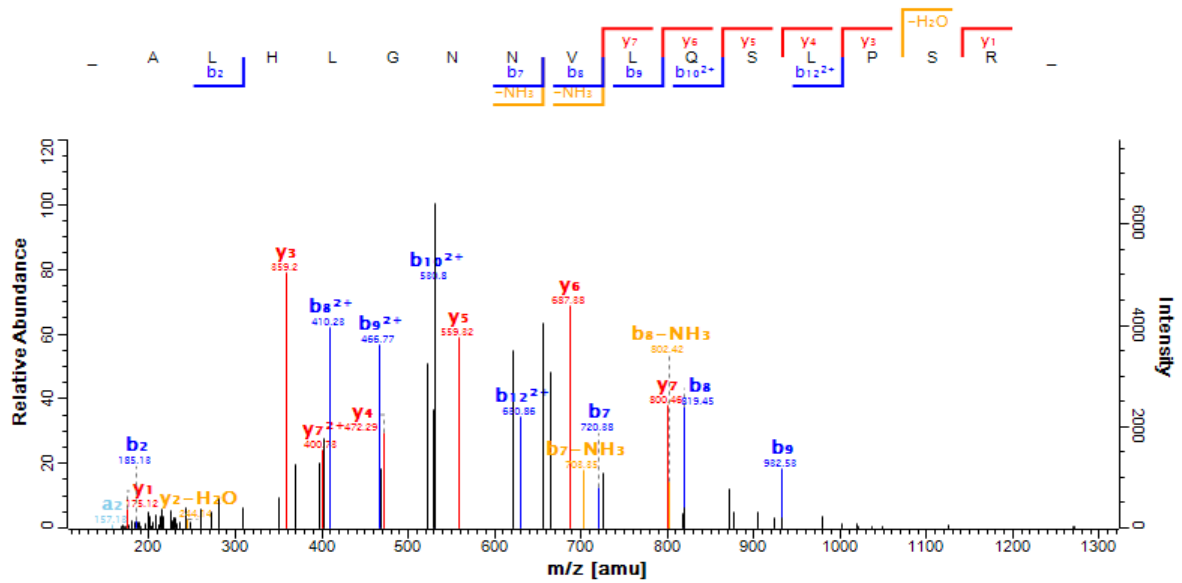

**Protein Group ID:** 3979  
**Protein Accession Numbers:** Q8IXH7; Q8IXH7-4  
**Gene Names:** TH1L  
**Peptide Sequence:** AVETVHNLCCNENK  
**Total Number of Spectra:** 3  
**Number of Replicates (out of 8):** 3  
**Best Match Score:** 91.307  
**Best Match Posterior Error Probability:** 0.001073  
**Best Match Spectrum:**

**Scan number** 12209      **Raw file** A549-US-Mock-top20CID-Elite-2ug-B12  
**Method** ITMS; CID      **Genenames** TH1L

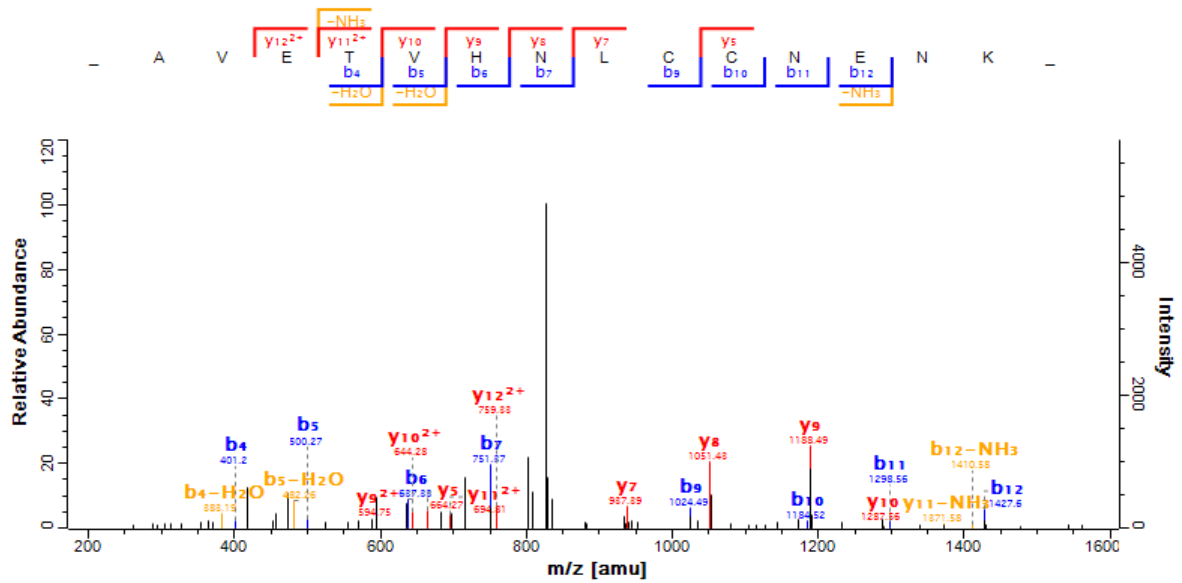

**Protein Group ID:** 3984  
**Protein Accession Numbers:** Q8IXQ4; Q8IXQ4-2  
**Gene Names:** KIAA1704  
**Peptide Sequence:** GPVNYNVTTTEFEK  
**Total Number of Spectra:** 5  
**Number of Replicates (out of 8):** 5  
**Best Match Score:** 141.37  
**Best Match Posterior Error Probability:** 1.64E-05  
**Best Match Spectrum:**

**Scan number** 40036      **Raw file** A549-US-Mock-top20CID-Elite-2ug-B12  
**Method** ITMS; CID      **Genenames** KIAA1704

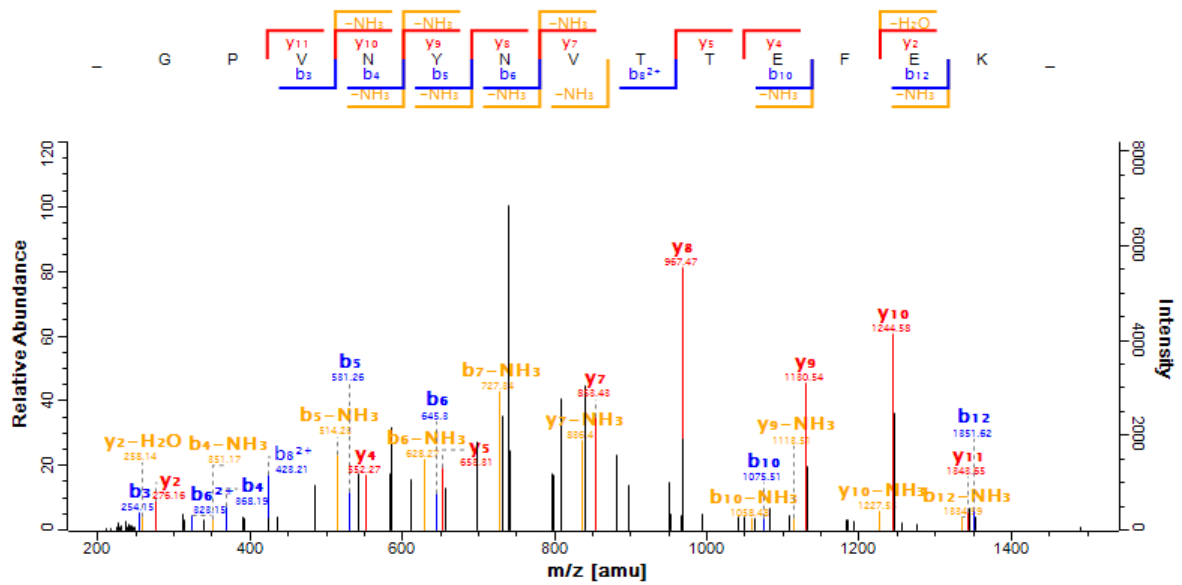

**Protein Group ID:** 3985  
**Protein Accession Numbers:** Q8IY18  
**Gene Names:** SMC5  
**Peptide Sequence:** ENTSQYFFITPK  
**Total Number of Spectra:** 1  
**Number of Replicates (out of 8):** 1  
**Best Match Score:** 117.07  
**Best Match Posterior Error Probability:** 0.00016953  
**Best Match Spectrum:**

**Scan number** 49951      **Raw file** A549-US-Mock-top20CID-Elite-2ug-B11  
**Method** ITMS; CID      **Genenames** SMC5

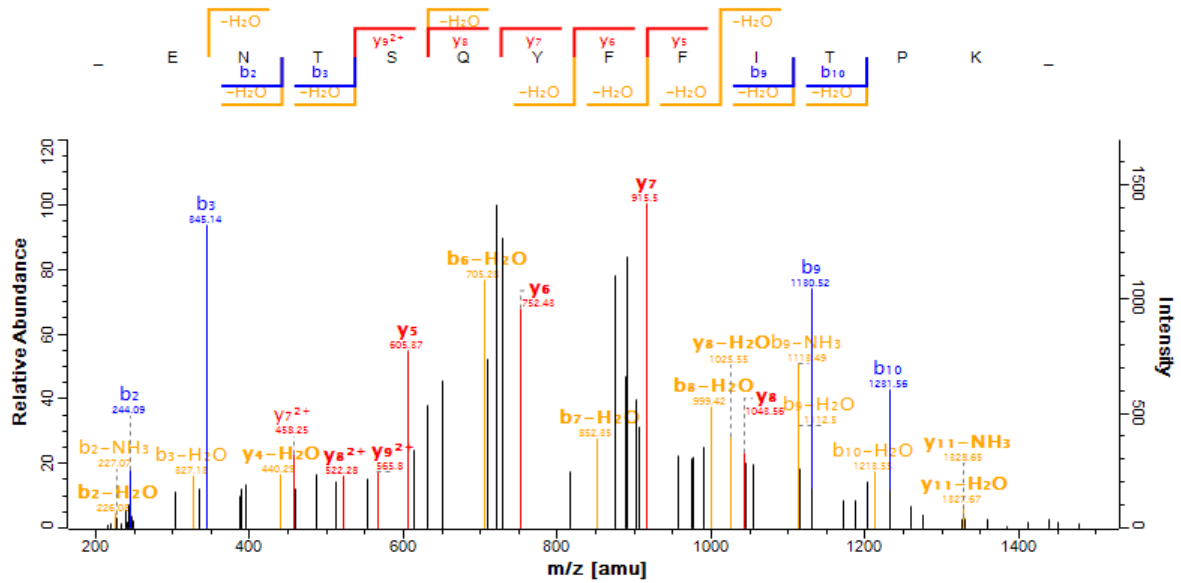

**Protein Group ID:** 3991

**Protein Accession Numbers:** Q8IYB5; Q8IYB5-2; Q8IYB5-3

**Gene Names:** SMAP1

**Peptide Sequence:** RPQTDQAVEFFIR

**Total Number of Spectra:** 8

**Number of Replicates (out of 8):** 7

**Best Match Score:** 133.32

**Best Match Posterior Error Probability:** 0.00010771

**Best Match Spectrum:**

|                    |           |                  |                                     |
|--------------------|-----------|------------------|-------------------------------------|
| <b>Scan number</b> | 49095     | <b>Raw file</b>  | A549-US-Mock-top20CID-Elite-2ug-B12 |
| <b>Method</b>      | ITMS; CID | <b>Genenames</b> | SMAP1                               |

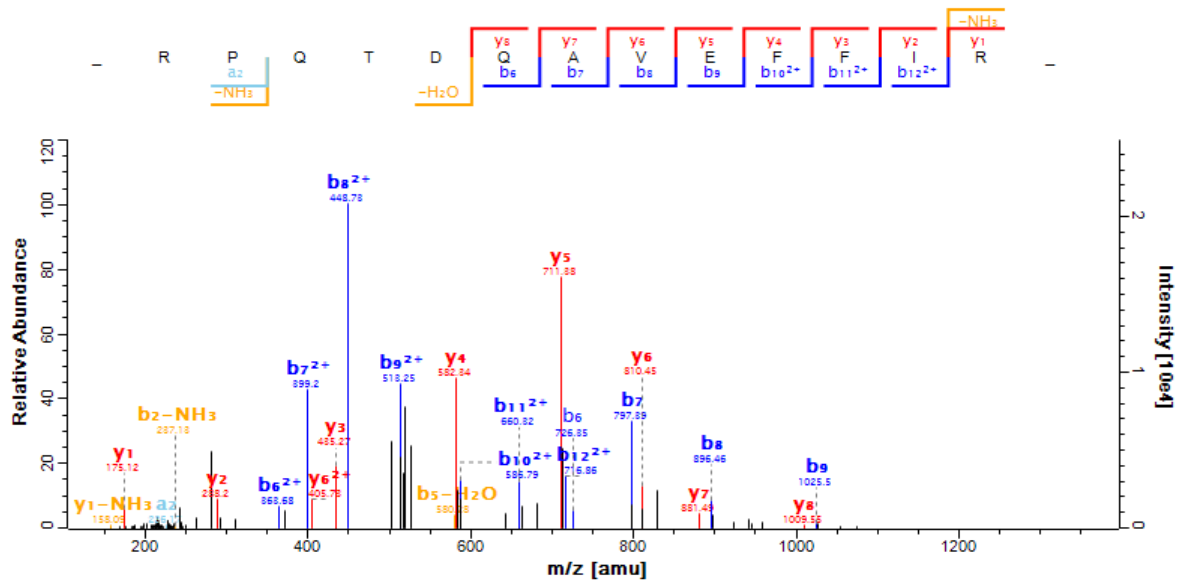

**Protein Group ID:** 3995  
**Protein Accession Numbers:** Q8IYL3  
**Gene Names:** Clorf174  
**Peptide Sequence:** LASAQEVAGSTSAK  
**Total Number of Spectra:** 4  
**Number of Replicates (out of 8):** 3  
**Best Match Score:** 90.725  
**Best Match Posterior Error Probability:** 0.0011283  
**Best Match Spectrum:**

**Scan number** 11899      **Raw file** A549-US-Mock-top20CID-Elite-2ug-B11  
**Method** ITMS; CID      **Genenames** Clorf174

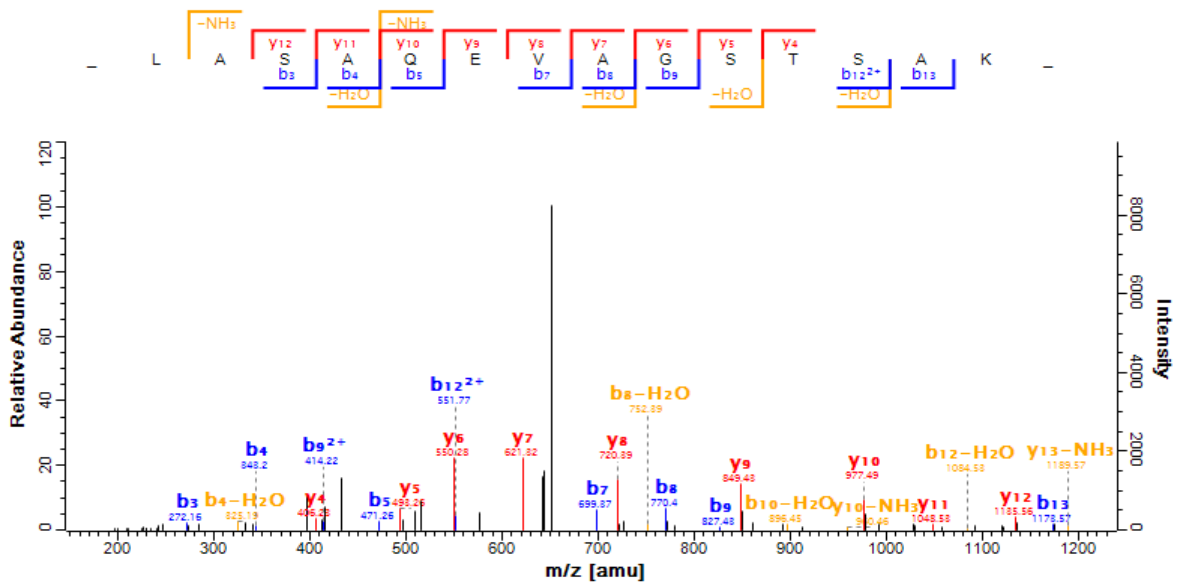

**Protein Group ID:** 3997

**Protein Accession Numbers:** Q8IYS1

**Gene Names:** PM20D2

**Peptide Sequence:** ASHSASYPWEGLNALDAAVLAYNNLSVFR

**Total Number of Spectra:** 2

**Number of Replicates (out of 8):** 2

**Best Match Score:** 61.417

**Best Match Posterior Error Probability:** 0.00033224

**Best Match Spectrum:**

|                    |           |                  |                                     |
|--------------------|-----------|------------------|-------------------------------------|
| <b>Scan number</b> | 92597     | <b>Raw file</b>  | A549-US-Mock-top20CID-Elite-2ug-B12 |
| <b>Method</b>      | ITMS; CID | <b>Genenames</b> | PM20D2                              |

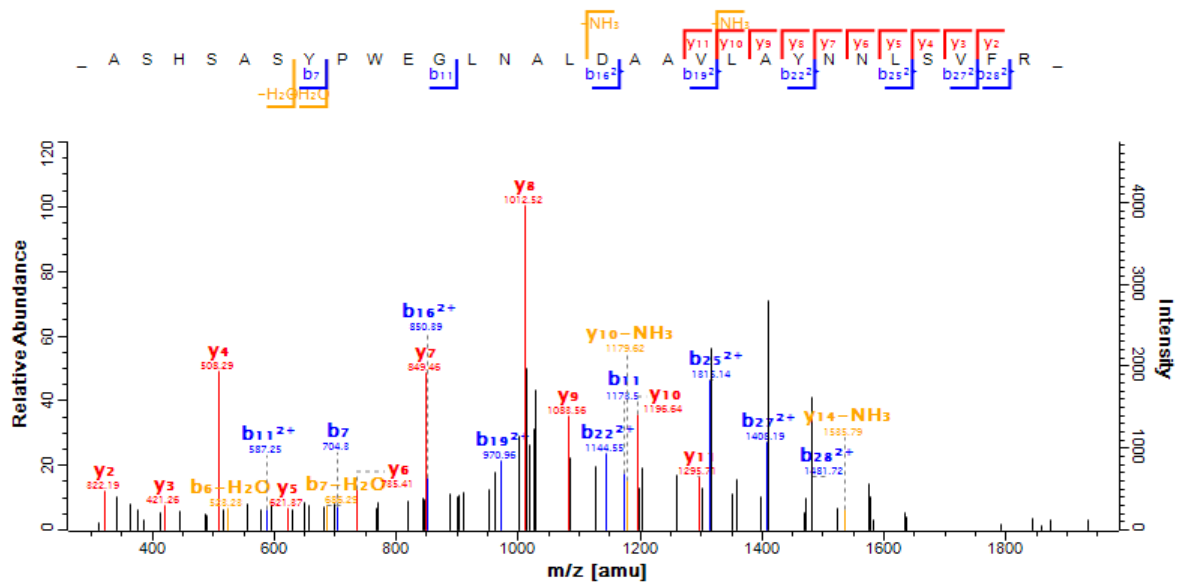



**Protein Group ID:** 4001  
**Protein Accession Numbers:** Q8IZJ0; Q8IZI9  
**Gene Names:** IL28A;IL28B  
**Peptide Sequence:** DALEESLLLK  
**Total Number of Spectra:** 1  
**Number of Replicates (out of 8):** 1  
**Best Match Score:** 92.538  
**Best Match Posterior Error Probability:** 0.0016515  
**Best Match Spectrum:**

**Scan number** 52811      **Raw file** A549-US-WT-top20CID-Elite-2ug-B13  
**Method** ITMS; CID      **Genenames** IL28A;IL28B

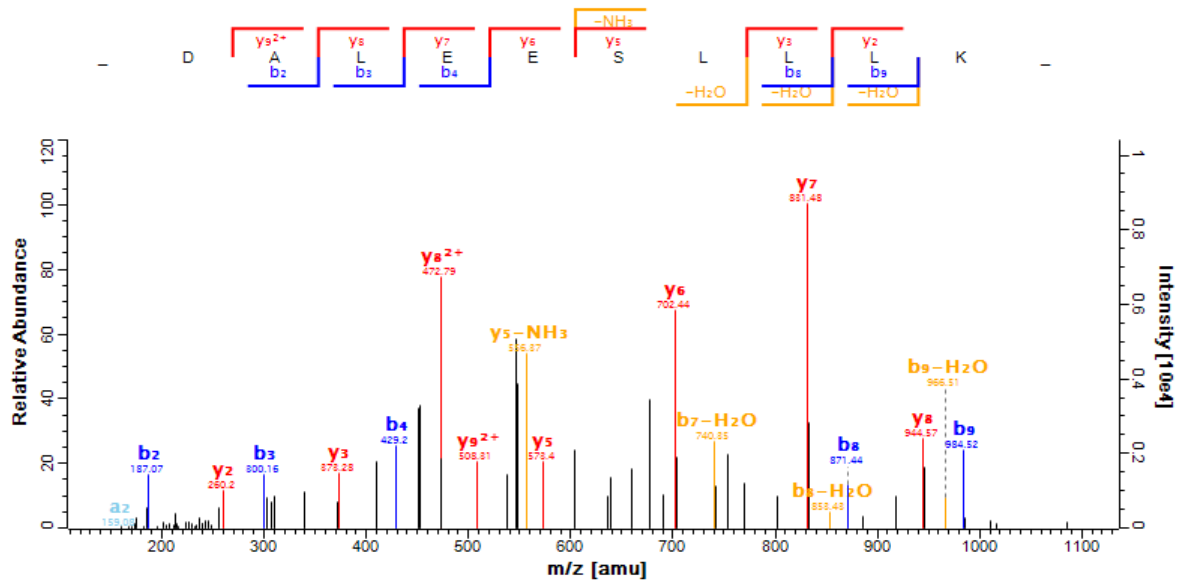

**Protein Group ID:** 4006

**Protein Accession Numbers:** Q8N108-12; Q8N108-13; Q8N108; Q8N108-15; Q8N108-17; Q8N108-18; Q8N108-14; Q8N108-16; Q8N108-19

**Gene Names:** MIER1

**Peptide Sequence:** DNEQALYELVK

**Total Number of Spectra:** 1

**Number of Replicates (out of 8):** 1

**Best Match Score:** 86.772

**Best Match Posterior Error Probability:** 0.0019088

**Best Match Spectrum:**

**Scan number** 50004      **Raw file** A549-US-WT-top20CID-Elite-2ug-B13  
**Method** ITMS; CID      **Genenames** MIER1

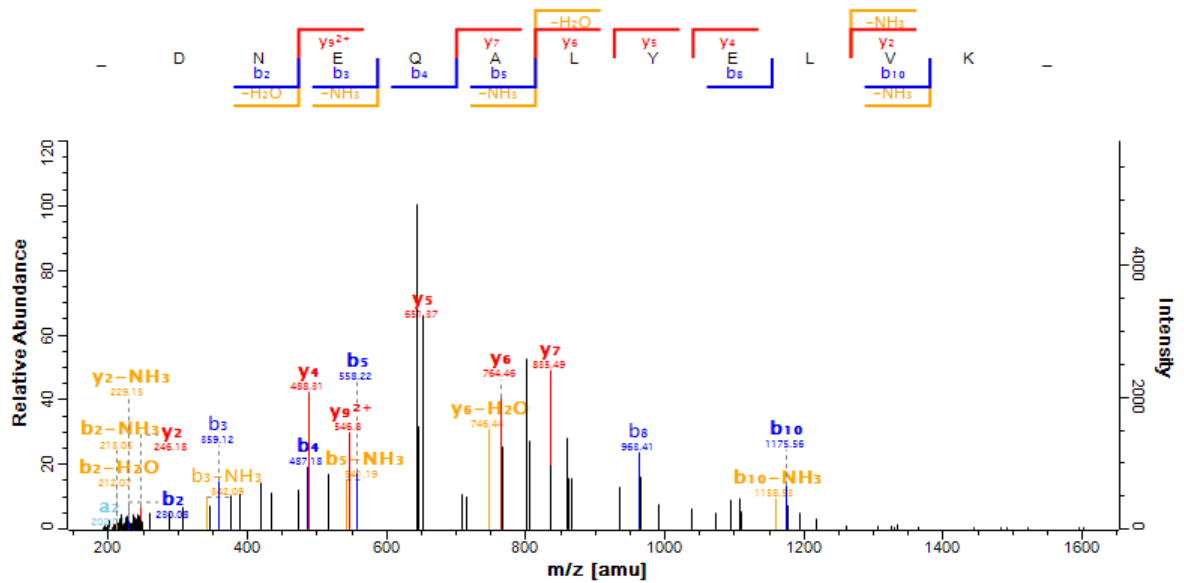

**Protein Group ID:** 4011  
**Protein Accession Numbers:** Q8N1Q1  
**Gene Names:** CA13  
**Peptide Sequence:** EFFPIADGDQQSPIEIK  
**Total Number of Spectra:** 2  
**Number of Replicates (out of 8):** 2  
**Best Match Score:** 202.41  
**Best Match Posterior Error Probability:** 3.20E-30  
**Best Match Spectrum:**

**Scan number** 64703      **Raw file** A549-US-WT-top20CID-Elite-2ug-B13  
**Method** ITMS; CID      **Genenames** CA13

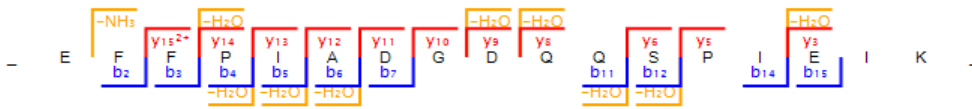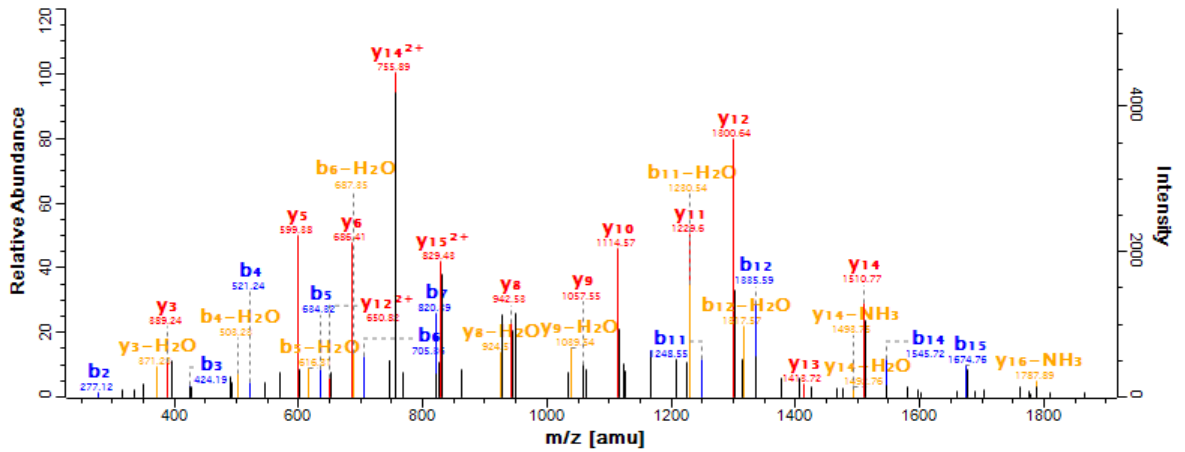

**Protein Group ID:** 4016  
**Protein Accession Numbers:** Q8N392; Q8N392-2  
**Gene Names:** ARHGAP18  
**Peptide Sequence:** YQGRDDEASNLVGEEK  
**Total Number of Spectra:** 5  
**Number of Replicates (out of 8):** 4  
**Best Match Score:** 133.86  
**Best Match Posterior Error Probability:** 0.00022249  
**Best Match Spectrum:**

**Scan number** 17381      **Raw file** A549-US-Mock-top20CID-Elite-2ug-B12  
**Method** ITMS; CID      **Genenames** ARHGAP18

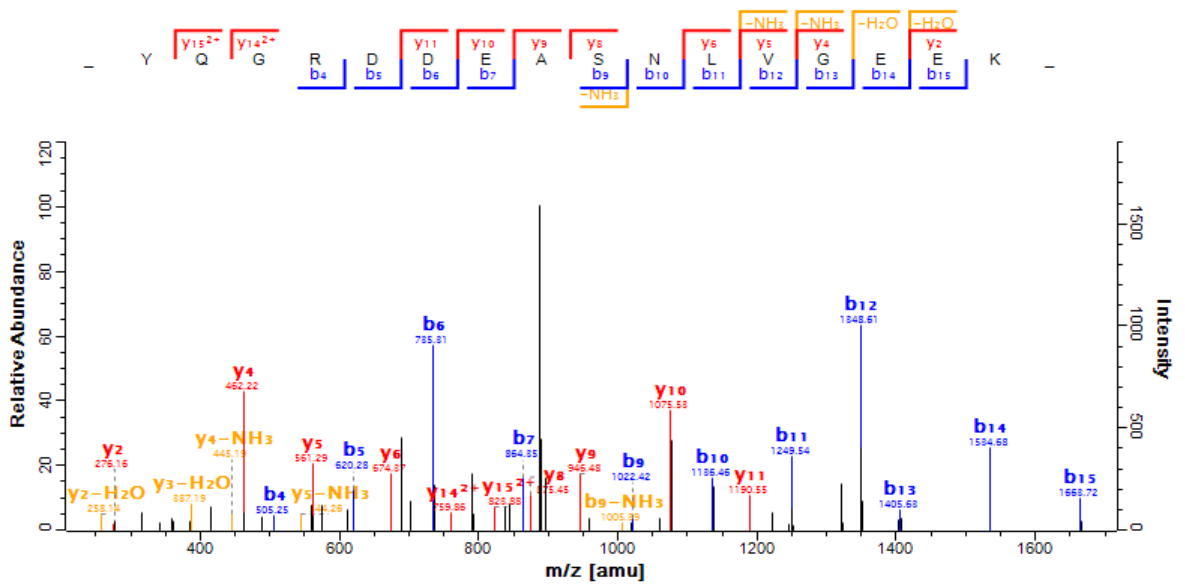

**Protein Group ID:** 4023  
**Protein Accession Numbers:** Q8N488  
**Gene Names:** RYBP  
**Peptide Sequence:** SDILKDPPEANSIQSANATTK  
**Total Number of Spectra:** 2  
**Number of Replicates (out of 8):** 2  
**Best Match Score:** 99.569  
**Best Match Posterior Error Probability:** 5.12E-05  
**Best Match Spectrum:**

**Scan number** 31582      **Raw file** A549-US-WT-top20CID-Elite-2ug-B12  
**Method** ITMS; CID      **Genenames** RYBP

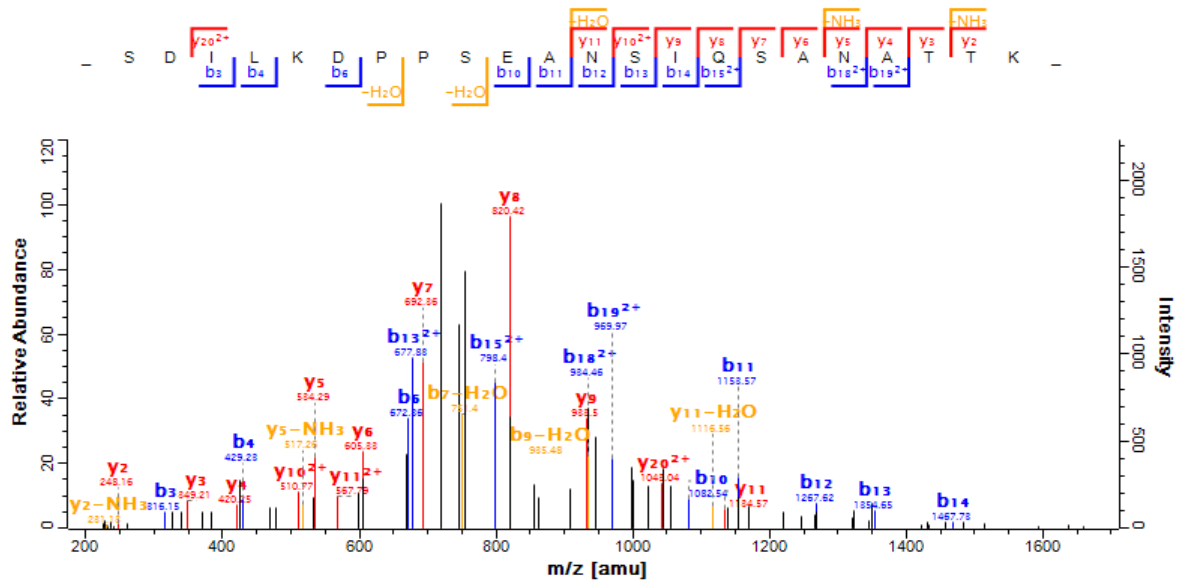

**Protein Group ID:** 4027  
**Protein Accession Numbers:** Q8N4Q0  
**Gene Names:** ZADH2  
**Peptide Sequence:** FVGVNASDINYSAGR  
**Total Number of Spectra:** 2  
**Number of Replicates (out of 8):** 2  
**Best Match Score:** 112.96  
**Best Match Posterior Error Probability:** 0.00010689  
**Best Match Spectrum:**

**Scan number** 38888      **Raw file** A549-US-Mock-top20CID-Elite-2ug-B13  
**Method** ITMS; CID      **Genenames** ZADH2

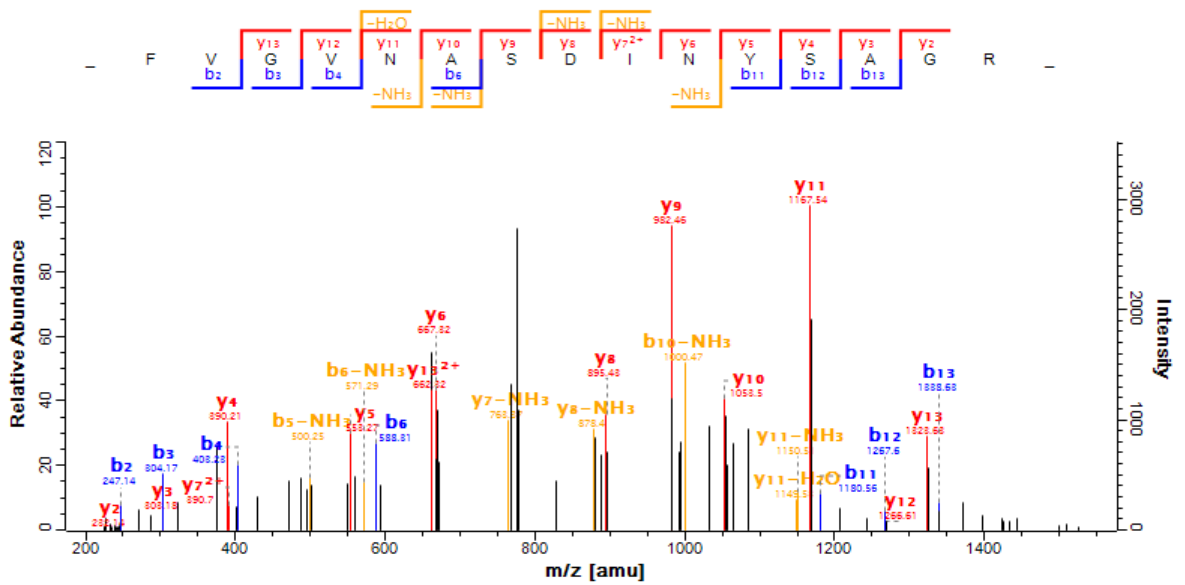

**Protein Group ID:** 4029

**Protein Accession Numbers:** Q8N4V1-2; Q8N4V1

**Gene Names:** MMGT1

**Peptide Sequence:** VLFRPSDTANSSNQDALSSLK

**Total Number of Spectra:** 10

**Number of Replicates (out of 8):** 8

**Best Match Score:** 124.08

**Best Match Posterior Error Probability:** 2.53E-11

**Best Match Spectrum:**

**Scan number** 36423      **Raw file** A549-US-Mock-top20CID-Elite-2ug-B11  
**Method** ITMS; CID      **Genenames** MMGT1

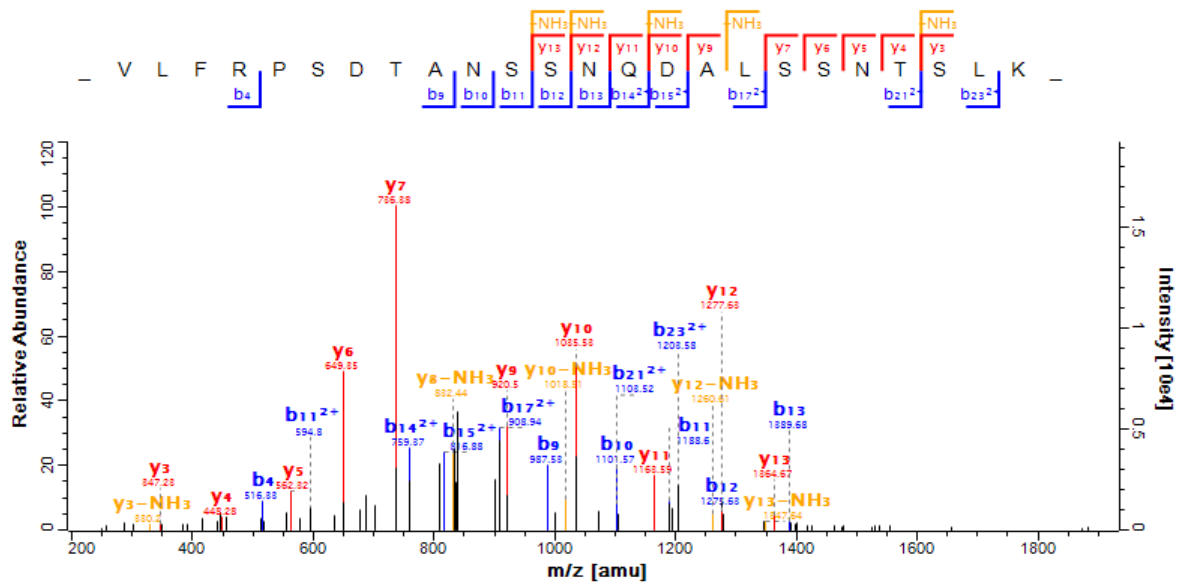

**Protein Group ID:** 4031

**Protein Accession Numbers:** Q8N5A5; Q8N5A5-2; Q8N5A5-3

**Gene Names:** ZGPAT

**Peptide Sequence:** EAITEAVEAPAAAR

**Total Number of Spectra:** 3

**Number of Replicates (out of 8):** 3

**Best Match Score:** 146.79

**Best Match Posterior Error Probability:** 2.19E-06

**Best Match Spectrum:**

**Scan number** 30143      **Raw file** A549-US-Mock-top20CID-Elite-2ug-B14  
**Method** ITMS; CID      **Genenames** ZGPAT

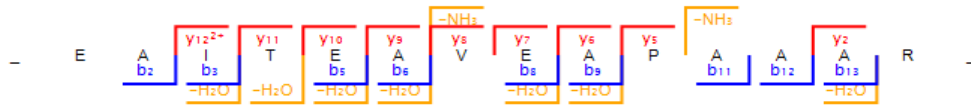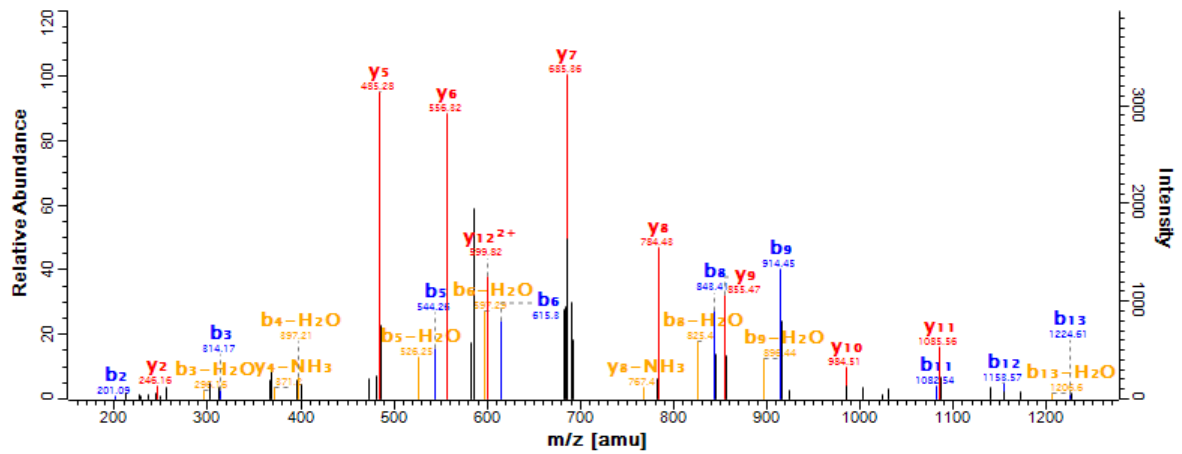



**Protein Group ID:** 4034  
**Protein Accession Numbers:** Q8N5G0; Q8N5G0-2  
**Gene Names:** C4orf52  
**Peptide Sequence:** AGIVQEDVQPPGLK  
**Total Number of Spectra:** 5  
**Number of Replicates (out of 8):** 4  
**Best Match Score:** 143.94  
**Best Match Posterior Error Probability:** 7.11E-06  
**Best Match Spectrum:**

**Scan number** 37720      **Raw file** A549-US-Mock-top20CID-Elite-2ug-B12  
**Method** ITMS; CID      **Genenames** C4orf52

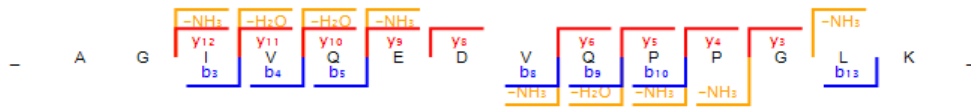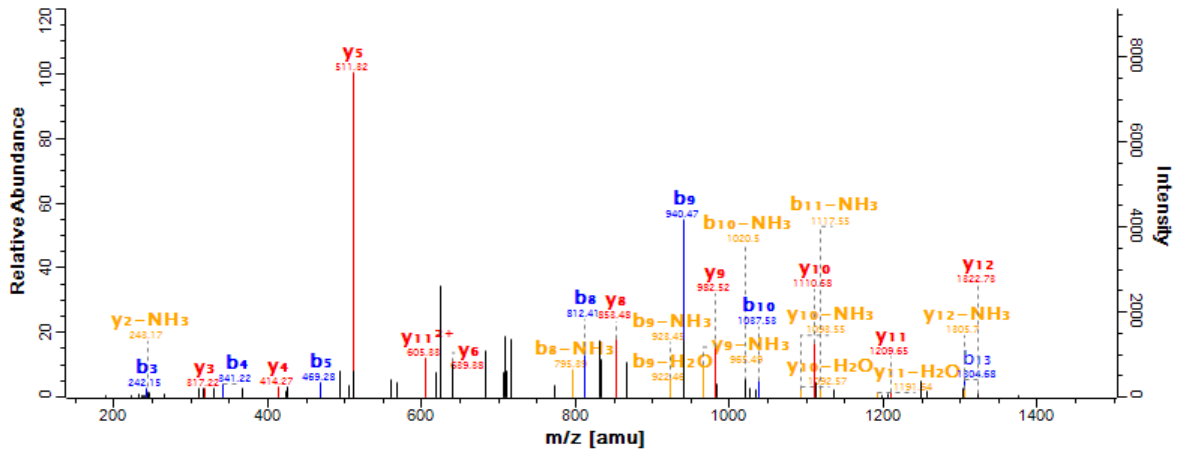

**Protein Group ID:** 4035  
**Protein Accession Numbers:** Q8N5I9  
**Gene Names:** C12orf45  
**Peptide Sequence:** SPLLDQVQTFLPQMAR  
**Total Number of Spectra:** 1  
**Number of Replicates (out of 8):** 1  
**Best Match Score:** 95.767  
**Best Match Posterior Error Probability:** 0.00031126  
**Best Match Spectrum:**

**Scan number** 78421      **Raw file** A549-US-Mock-top20CID-Elite-2ug-B12  
**Method** ITMS; CID      **Genenames** C12orf45

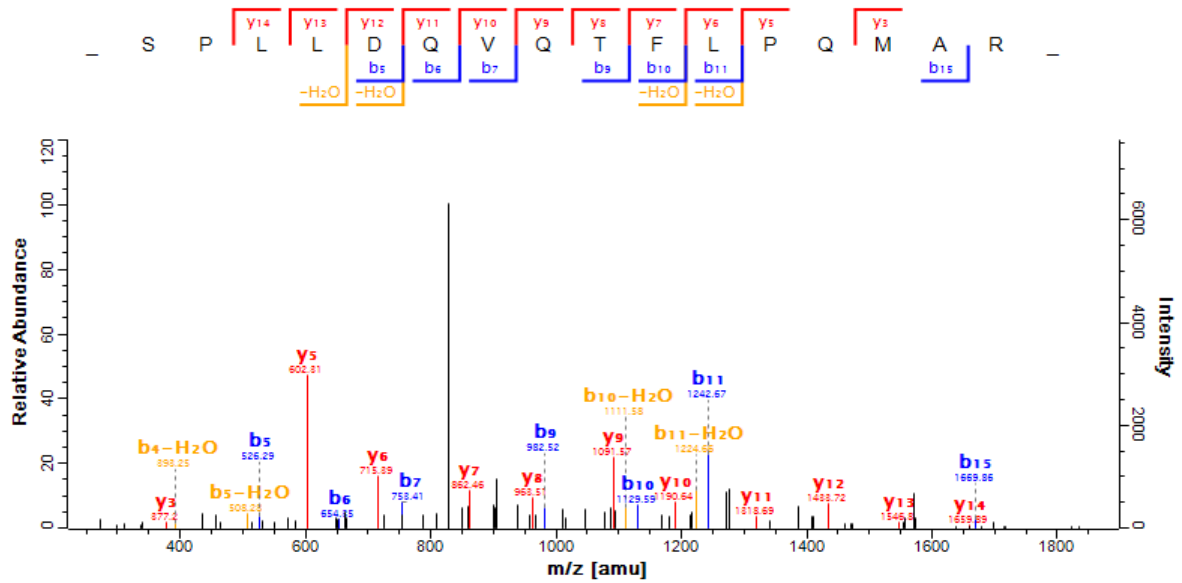

**Protein Group ID:** 4036  
**Protein Accession Numbers:** Q8N5L8  
**Gene Names:** RPP25L  
**Peptide Sequence:** NLLGLALGR  
**Total Number of Spectra:** 5  
**Number of Replicates (out of 8):** 5  
**Best Match Score:** 149.82  
**Best Match Posterior Error Probability:** 1.93E-05  
**Best Match Spectrum:**

**Scan number** 57615      **Raw file** A549-US-Mock-top20CID-Elite-2ug-B13  
**Method** ITMS; CID      **Genenames** RPP25L

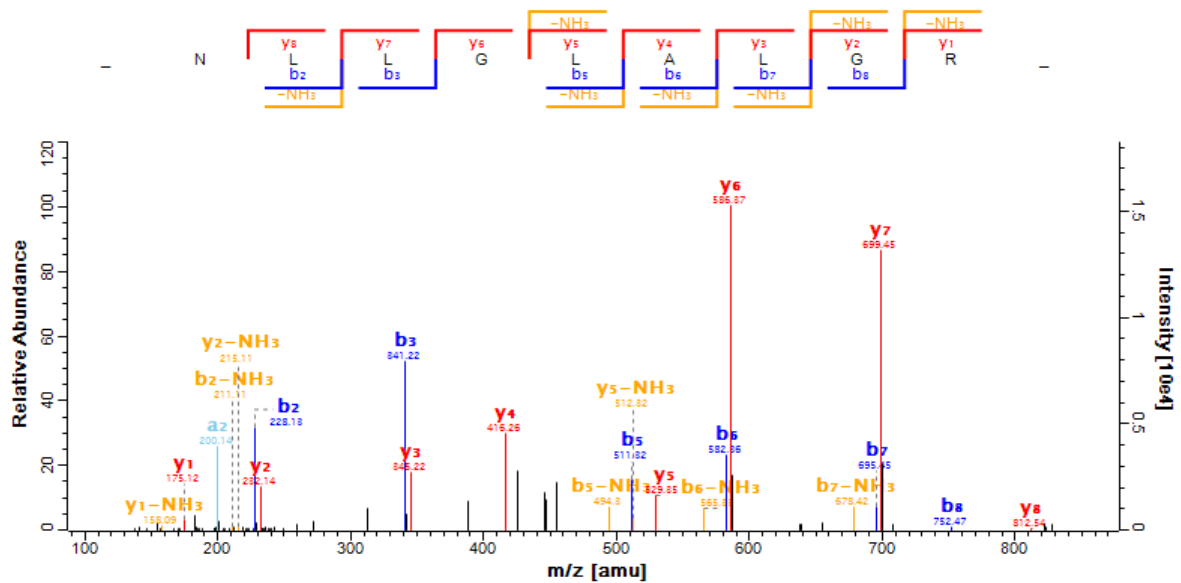

**Protein Group ID:** 4037  
**Protein Accession Numbers:** Q8N5M9  
**Gene Names:** JAGN1  
**Peptide Sequence:** LLDSWFTSTQEK  
**Total Number of Spectra:** 8  
**Number of Replicates (out of 8):** 8  
**Best Match Score:** 156.36  
**Best Match Posterior Error Probability:** 3.80E-07  
**Best Match Spectrum:**

**Scan number** 56051      **Raw file** A549-US-WT-top20CID-Elite-2ug-B13  
**Method** ITMS; CID      **Genenames** JAGN1

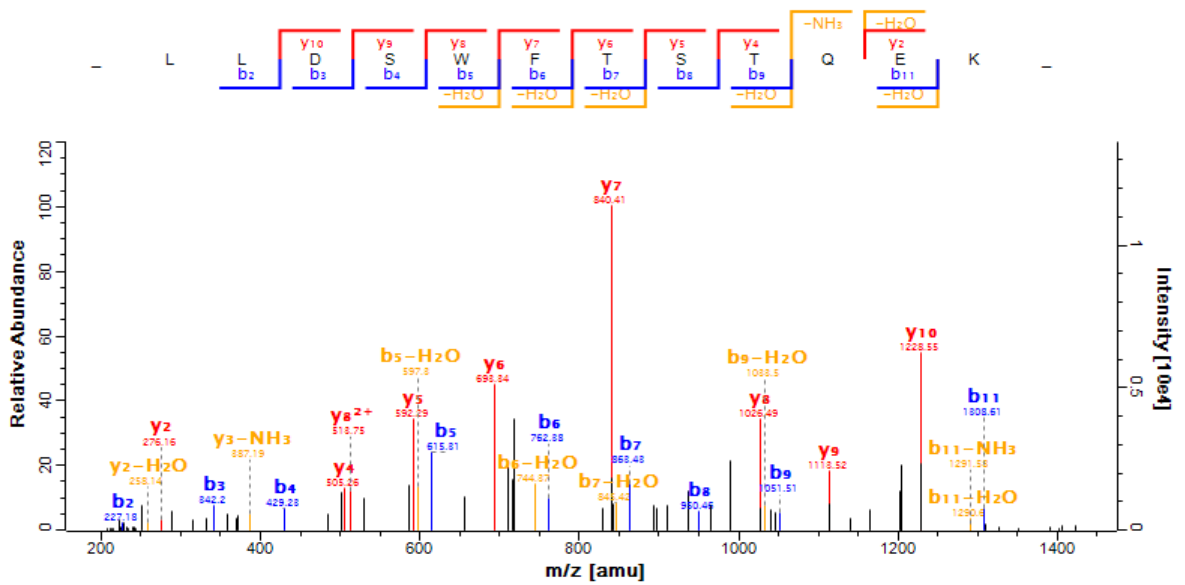

**Protein Group ID:** 4044  
**Protein Accession Numbers:** Q8N6S5  
**Gene Names:** ARL6IP6  
**Peptide Sequence:** AEFSAGAWSEPR  
**Total Number of Spectra:** 5  
**Number of Replicates (out of 8):** 3  
**Best Match Score:** 124.12  
**Best Match Posterior Error Probability:** 0.00010302  
**Best Match Spectrum:**

**Scan number** 35999      **Raw file** A549-US-Mock-top20CID-Elite-2ug-B13  
**Method** ITMS; CID      **Genenames** ARL6IP6

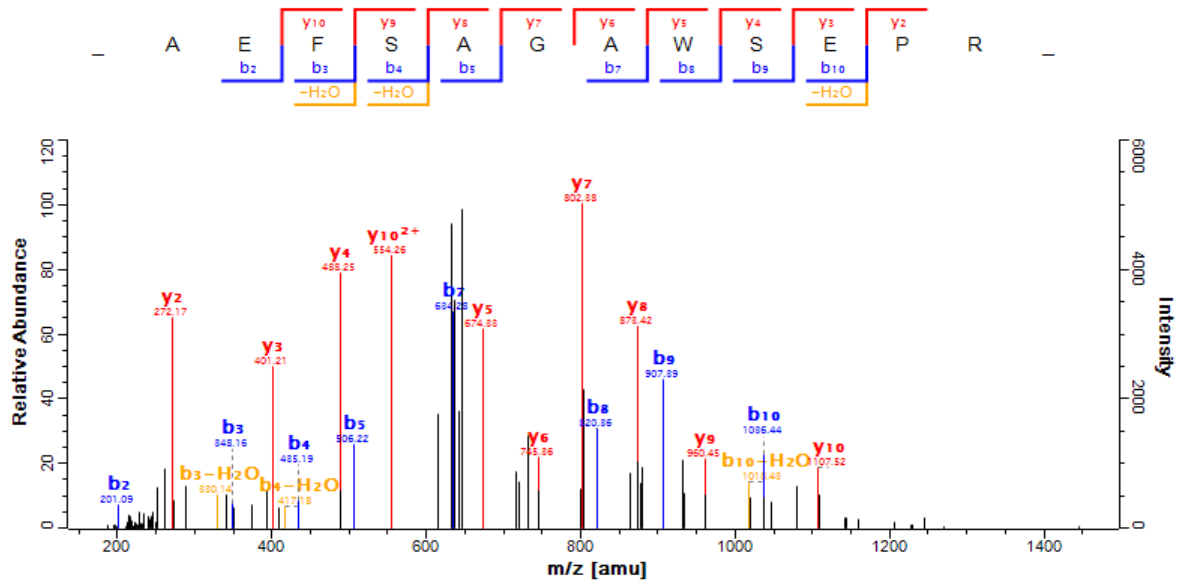

**Protein Group ID:** 4055  
**Protein Accession Numbers:** Q8NB46  
**Gene Names:** ANKRD52  
**Peptide Sequence:** DTLWLTP LHR  
**Total Number of Spectra:** 2  
**Number of Replicates (out of 8):** 2  
**Best Match Score:** 100.02  
**Best Match Posterior Error Probability:** 0.00078513  
**Best Match Spectrum:**

**Scan number** 51132      **Raw file** A549-US-Mock-top20CID-Elite-2ug-B13  
**Method** ITMS; CID      **Genenames** ANKRD52

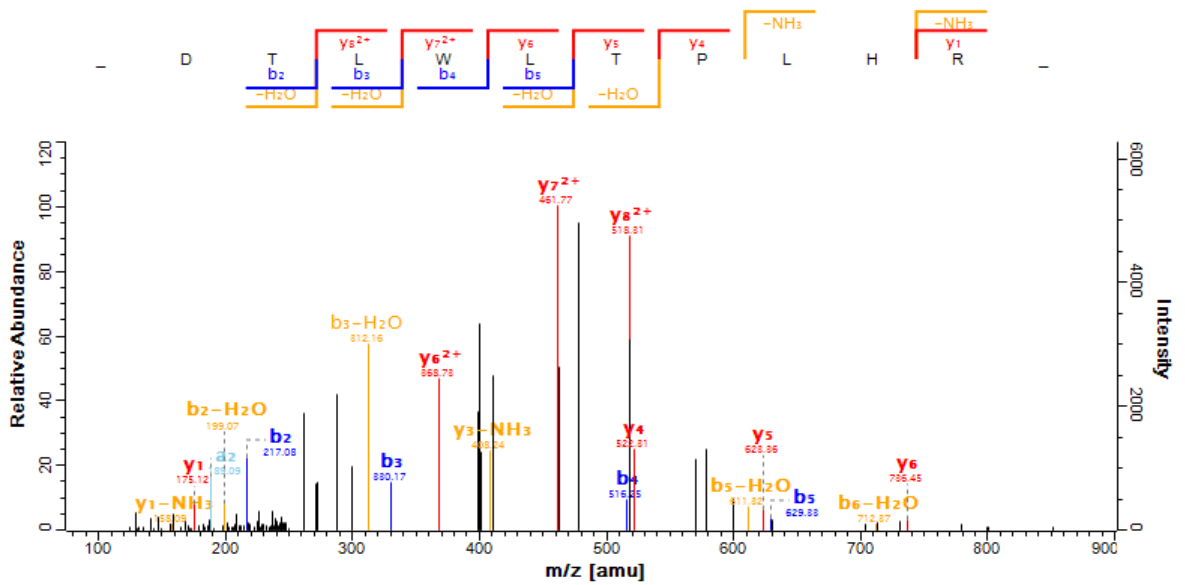

**Protein Group ID:** 4061

**Protein Accession Numbers:** Q8NBM4; Q8NBM4-2; Q8NBM4-3; Q8NBM4-4

**Gene Names:** UBAC2

**Peptide Sequence:** QSEPAAPPLEVSEEQVAR

**Total Number of Spectra:** 6

**Number of Replicates (out of 8):** 4

**Best Match Score:** 98.169

**Best Match Posterior Error Probability:** 0.00019595

**Best Match Spectrum:**

**Scan number** 37912      **Raw file** A549-US-Mock-top20CID-Elite-2ug-B12  
**Method** ITMS; CID      **Genenames** UBAC2

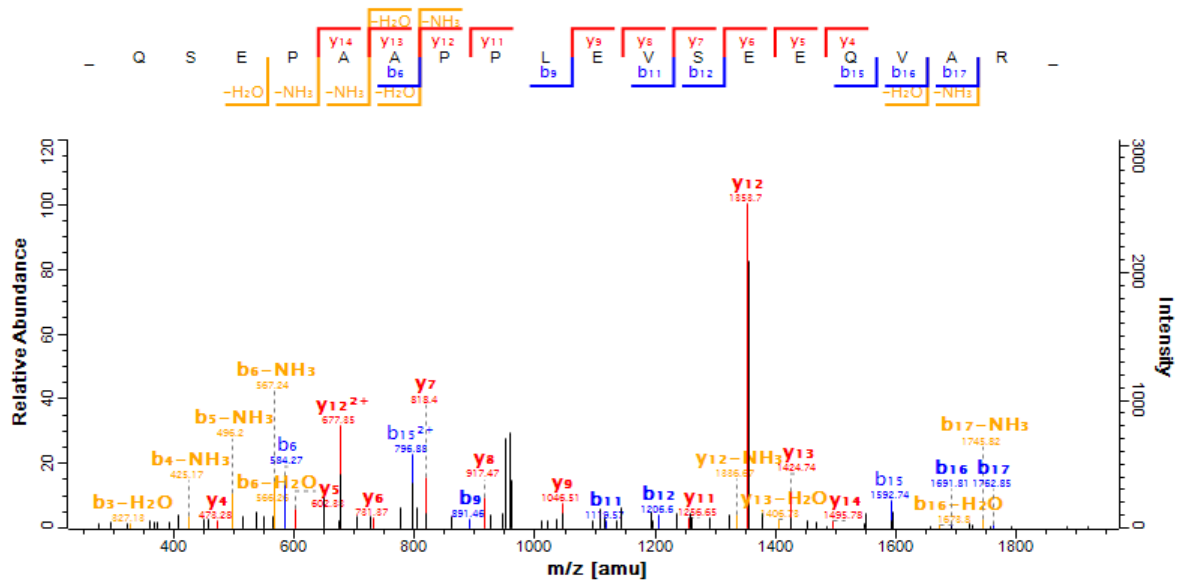

**Protein Group ID:** 4071  
**Protein Accession Numbers:** Q8NC60  
**Gene Names:** NOA1  
**Peptide Sequence:** QLQELQQQEEEEER  
**Total Number of Spectra:** 3  
**Number of Replicates (out of 8):** 2  
**Best Match Score:** 144.27  
**Best Match Posterior Error Probability:** 5.96E-06  
**Best Match Spectrum:**

**Scan number** 18130      **Raw file** A549-US-WT-top20CID-Elite-2ug-B14  
**Method** ITMS; CID      **Genenames** NOA1

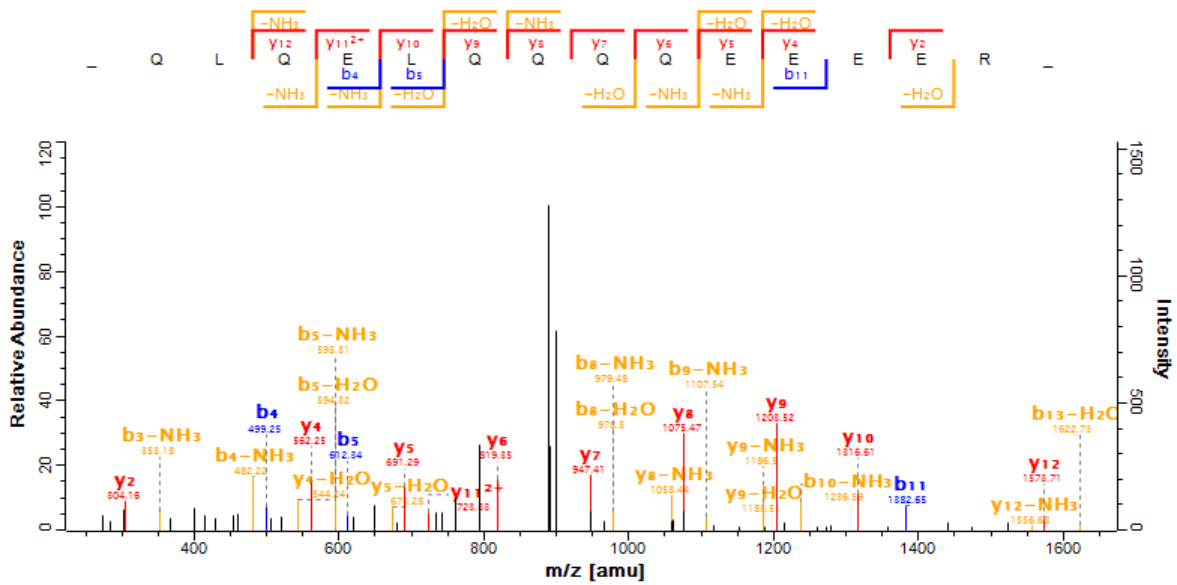



**Protein Group ID:** 4074  
**Protein Accession Numbers:** Q8NCN4  
**Gene Names:** RNF169  
**Peptide Sequence:** LSDSENEEPSR  
**Total Number of Spectra:** 2  
**Number of Replicates (out of 8):** 2  
**Best Match Score:** 85.522  
**Best Match Posterior Error Probability:** 0.0022799  
**Best Match Spectrum:**

**Scan number** 4393      **Raw file** A549-US-WT-top20CID-Elite-2ug-B14  
**Method** ITMS; CID      **Genenames** RNF169

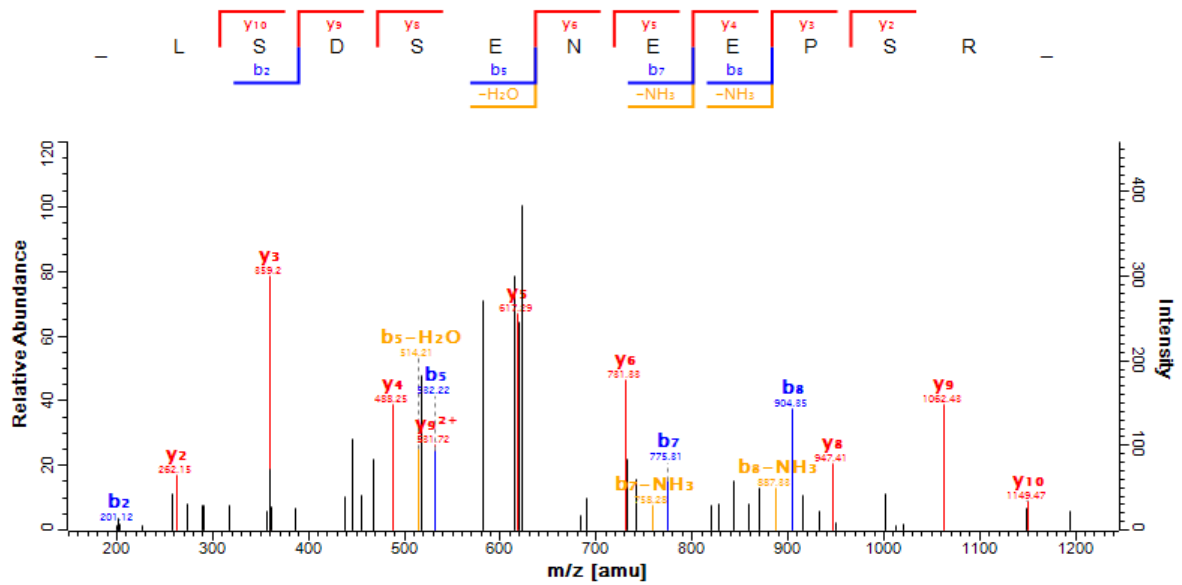

**Protein Group ID:** 4079  
**Protein Accession Numbers:** Q8NDH2  
**Gene Names:** CCDC168  
**Peptide Sequence:** KQSPHENSILR  
**Total Number of Spectra:** 2  
**Number of Replicates (out of 8):** 2  
**Best Match Score:** 87.184  
**Best Match Posterior Error Probability:** 0.0040334  
**Best Match Spectrum:**

**Scan number** 15047      **Raw file** A549-US-WT-top20CID-Elite-2ug-B14  
**Method** ITMS; CID      **Genenames** CCDC168

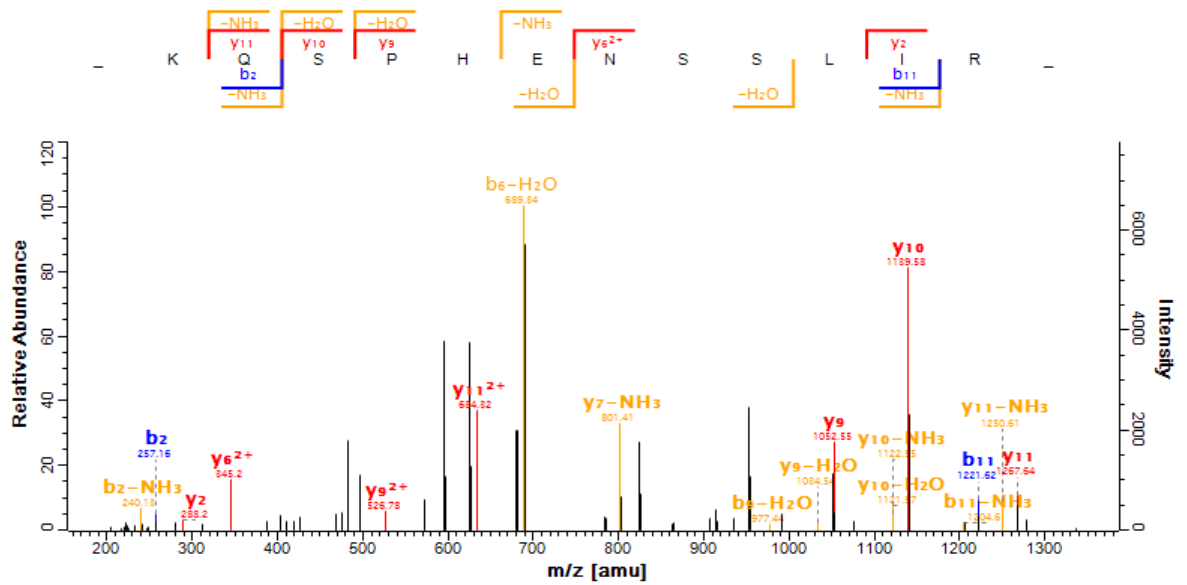

**Protein Group ID:** 4082

**Protein Accession Numbers:** Q8NDV7; Q8NDV7-5; Q8NDV7-6; Q8NDV7-2

**Gene Names:** TNRC6A

**Peptide Sequence:** TGGTVESDGSTESTGR

**Total Number of Spectra:** 2

**Number of Replicates (out of 8):** 2

**Best Match Score:** 104.41

**Best Match Posterior Error Probability:** 0.00014064

**Best Match Spectrum:**

**Scan number** 2860      **Raw file** A549-US-Mock-top20CID-Elite-2ug-B11  
**Method** ITMS; CID      **Genenames** TNRC6A

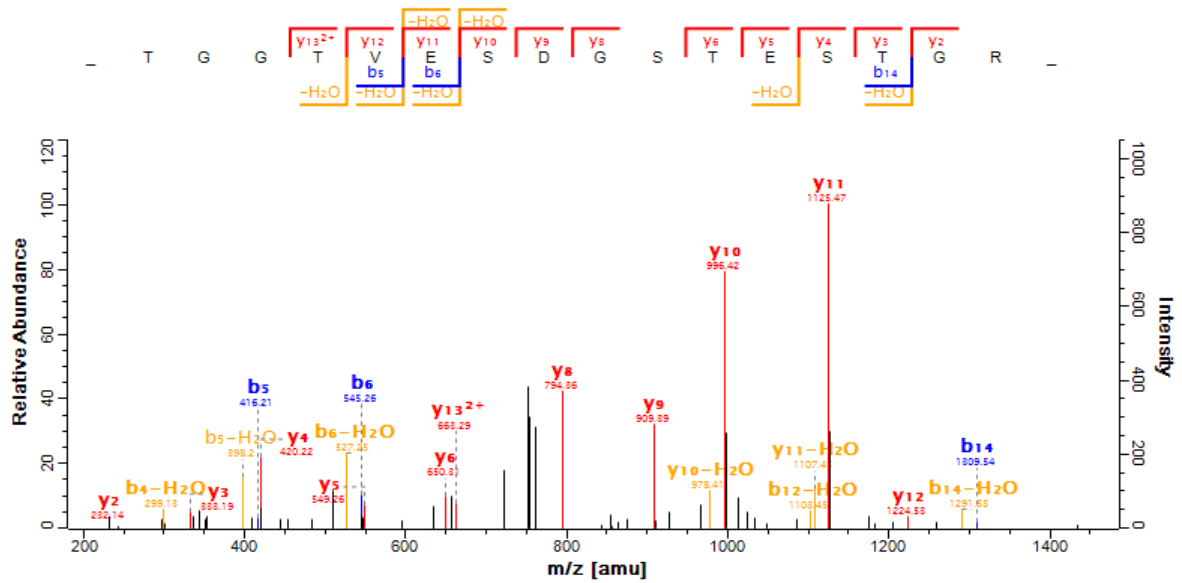

**Protein Group ID:** 4087  
**Protein Accession Numbers:** Q8NEM2  
**Gene Names:** SHCBP1  
**Peptide Sequence:** GDTFVDCTGADIK  
**Total Number of Spectra:** 1  
**Number of Replicates (out of 8):** 1  
**Best Match Score:** 113.24  
**Best Match Posterior Error Probability:** 0.00026425  
**Best Match Spectrum:**

**Scan number** 30302      **Raw file** A549-US-Mock-top20CID-Elite-2ug-B11  
**Method** ITMS; CID      **Genenames** SHCBP1

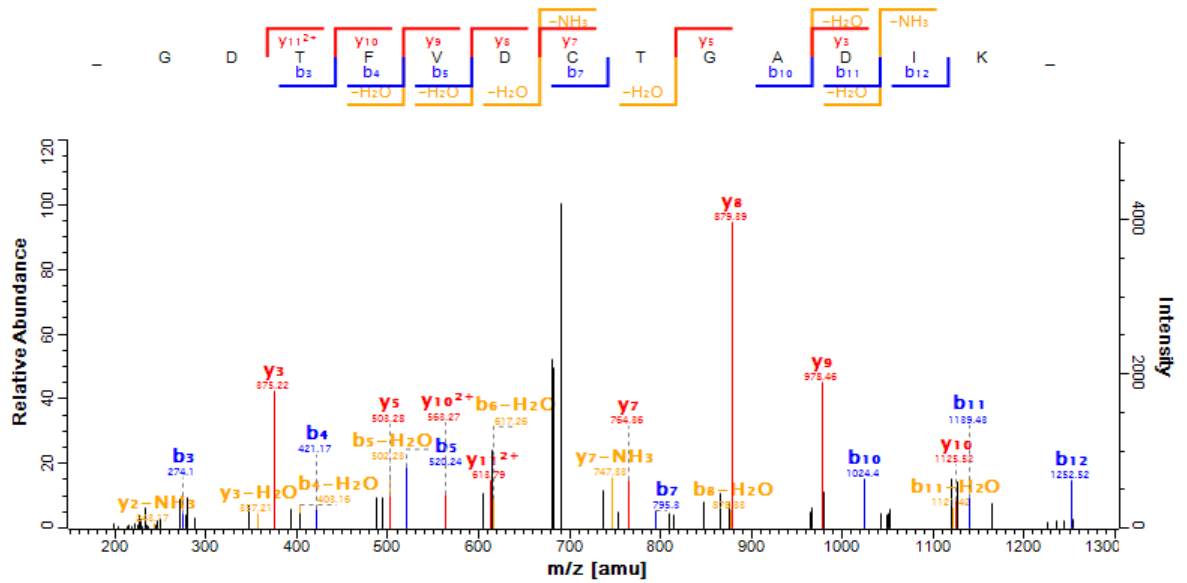

**Protein Group ID:** 4095

**Protein Accession Numbers:** Q8NFJ5

**Gene Names:** GPRC5A

**Peptide Sequence:** AYSQEEITQGFEETGDTLYAPYSTHFQLQNQPQK

**Total Number of Spectra:** 12

**Number of Replicates (out of 8):** 7

**Best Match Score:** 100.95

**Best Match Posterior Error Probability:** 4.28E-18

**Best Match Spectrum:**

**Scan number** 68303      **Raw file** A549-US-Mock-top20CID-Elite-2ug-B14  
**Method** ITMS; CID      **Genenames** GPRC5A

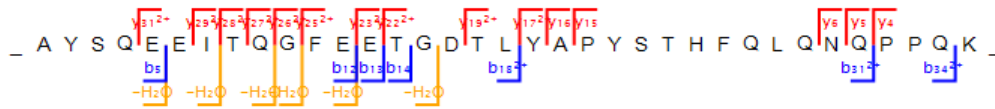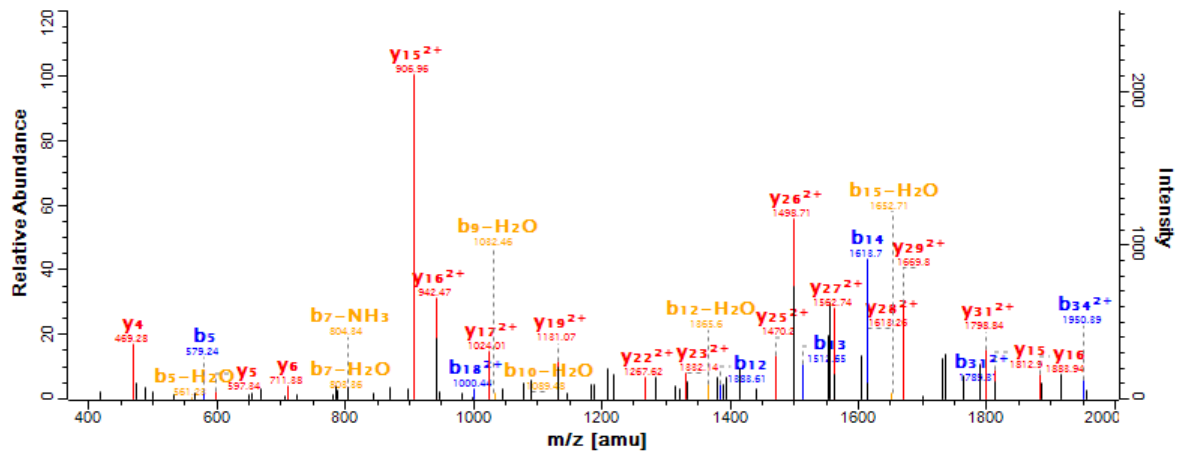

**Protein Group ID:** 4099  
**Protein Accession Numbers:** Q8NHP6; Q8NHP6-2  
**Gene Names:** MOSPD2  
**Peptide Sequence:** LIAFWLER  
**Total Number of Spectra:** 3  
**Number of Replicates (out of 8):** 3  
**Best Match Score:** 111.95  
**Best Match Posterior Error Probability:** 0.0027497  
**Best Match Spectrum:**

|                    |           |                  |                                   |
|--------------------|-----------|------------------|-----------------------------------|
| <b>Scan number</b> | 68101     | <b>Raw file</b>  | A549-US-WT-top20CID-Elite-2ug-B13 |
| <b>Method</b>      | ITMS; CID | <b>Genenames</b> | MOSPD2                            |

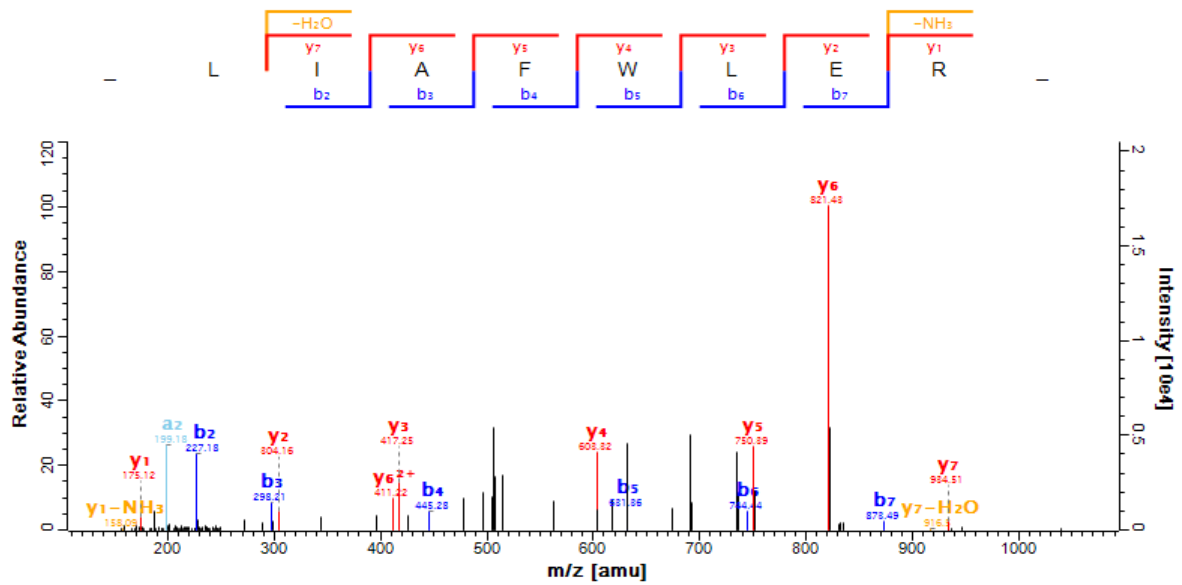

**Protein Group ID:** 4107

**Protein Accession Numbers:** Q8TAD4; Q8TAD4-2

**Gene Names:** SLC30A5

**Peptide Sequence:** GTLIGYSPEGTPLYNFMGDAFQHSQSIPR

**Total Number of Spectra:** 1

**Number of Replicates (out of 8):** 1

**Best Match Score:** 58.272

**Best Match Posterior Error Probability:** 0.00052967

**Best Match Spectrum:**

**Scan number** 83432      **Raw file** A549-US-WT-top20CID-Elite-2ug-B14  
**Method** ITMS; CID      **Genenames** SLC30A5

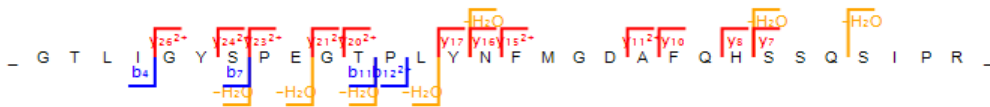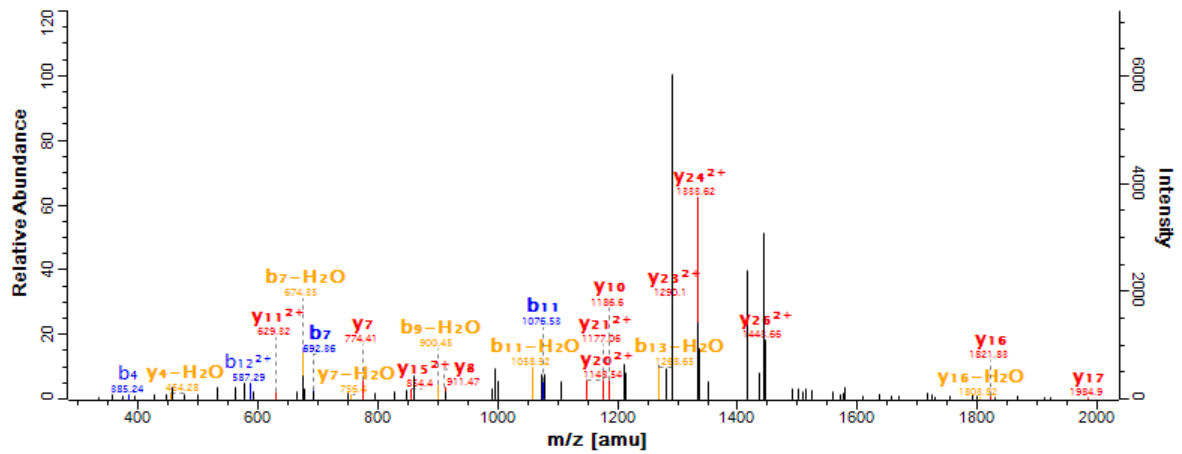

**Protein Group ID:** 4108  
**Protein Accession Numbers:** Q8TAD8  
**Gene Names:** SNIP1  
**Peptide Sequence:** EKPSFELSGALSLR  
**Total Number of Spectra:** 5  
**Number of Replicates (out of 8):** 4  
**Best Match Score:** 117.18  
**Best Match Posterior Error Probability:** 9.88E-05  
**Best Match Spectrum:**

**Scan number** 64570      **Raw file** A549-US-Mock-top20CID-Elite-2ug-B13  
**Method** ITMS; CID      **Genenames** SNIP1

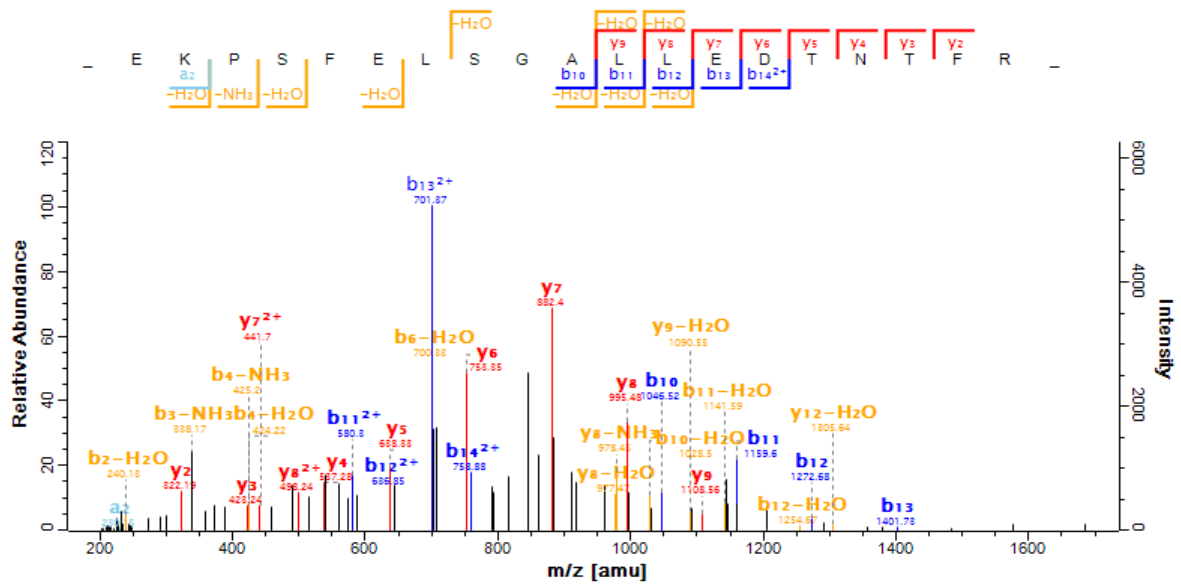



**Protein Group ID:** 4111  
**Protein Accession Numbers:** Q8TAP9  
**Gene Names:** MPLKIP  
**Peptide Sequence:** SPAGSQQFGYSPGQQTHPQGS  
**Total Number of Spectra:** 1  
**Number of Replicates (out of 8):** 1  
**Best Match Score:** 80.109  
**Best Match Posterior Error Probability:** 9.03E-05  
**Best Match Spectrum:**

**Scan number** 19427      **Raw file** A549-US-Mock-top20CID-Elite-2ug-B11  
**Method** ITMS; CID      **Genenames** MPLKIP

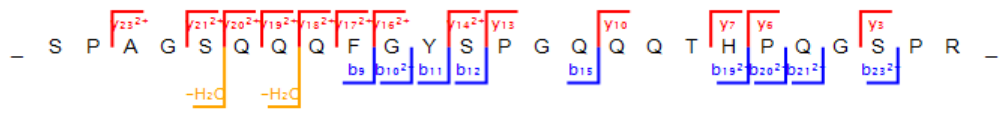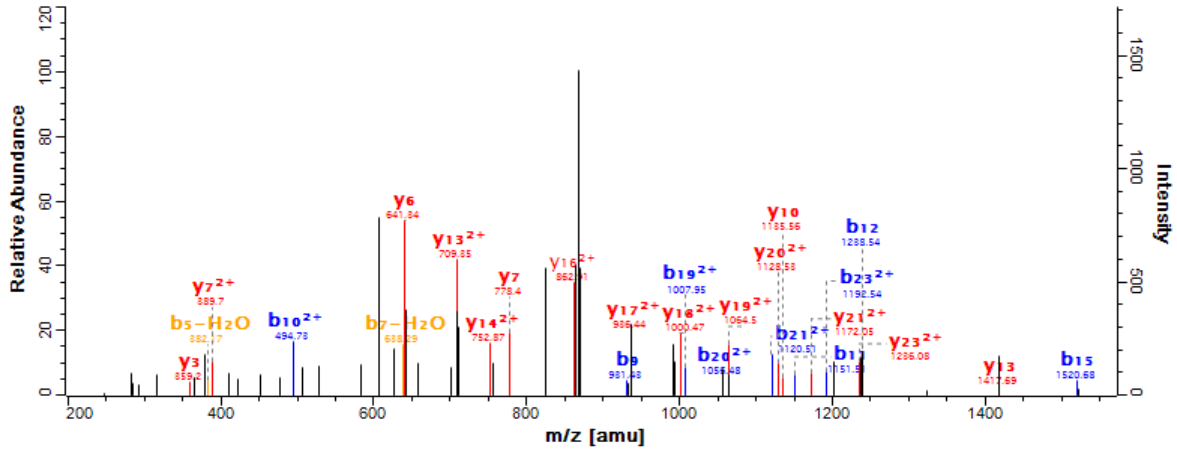

**Protein Group ID:** 4113  
**Protein Accession Numbers:** Q8TAT5  
**Gene Names:** NEIL3  
**Peptide Sequence:** TAFGTTTLVLTFDSNK  
**Total Number of Spectra:** 1  
**Number of Replicates (out of 8):** 1  
**Best Match Score:** 81.904  
**Best Match Posterior Error Probability:** 0.0084319  
**Best Match Spectrum:**

**Scan number** 64962      **Raw file** A549-US-Mock-top20CID-Elite-2ug-B13  
**Method** ITMS; CID      **Genenames** NEIL3

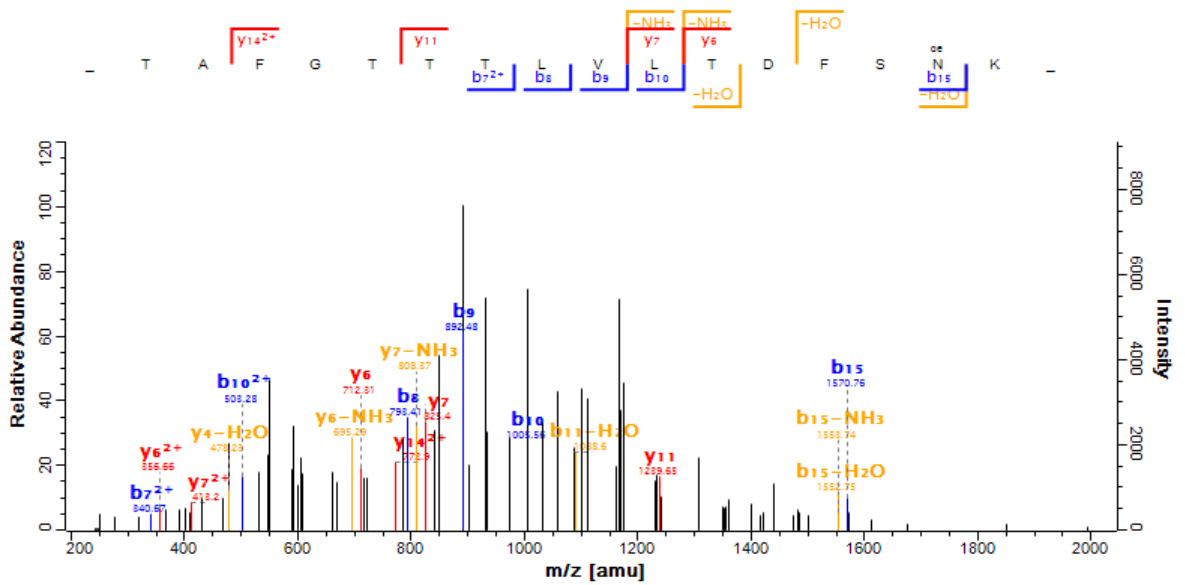

**Protein Group ID:** 4115

**Protein Accession Numbers:** Q8TB22-2; Q8TB22; Q8TB22-4

**Gene Names:** SPATA20

**Peptide Sequence:** SATVSSVPMAGGK

**Total Number of Spectra:** 2

**Number of Replicates (out of 8):** 2

**Best Match Score:** 76.01

**Best Match Posterior Error Probability:** 0.0034692

**Best Match Spectrum:**

|                    |           |                  |                                     |
|--------------------|-----------|------------------|-------------------------------------|
| <b>Scan number</b> | 22806     | <b>Raw file</b>  | A549-US-Mock-top20CID-Elite-2ug-B13 |
| <b>Method</b>      | ITMS; CID | <b>Genenames</b> | SPATA20                             |

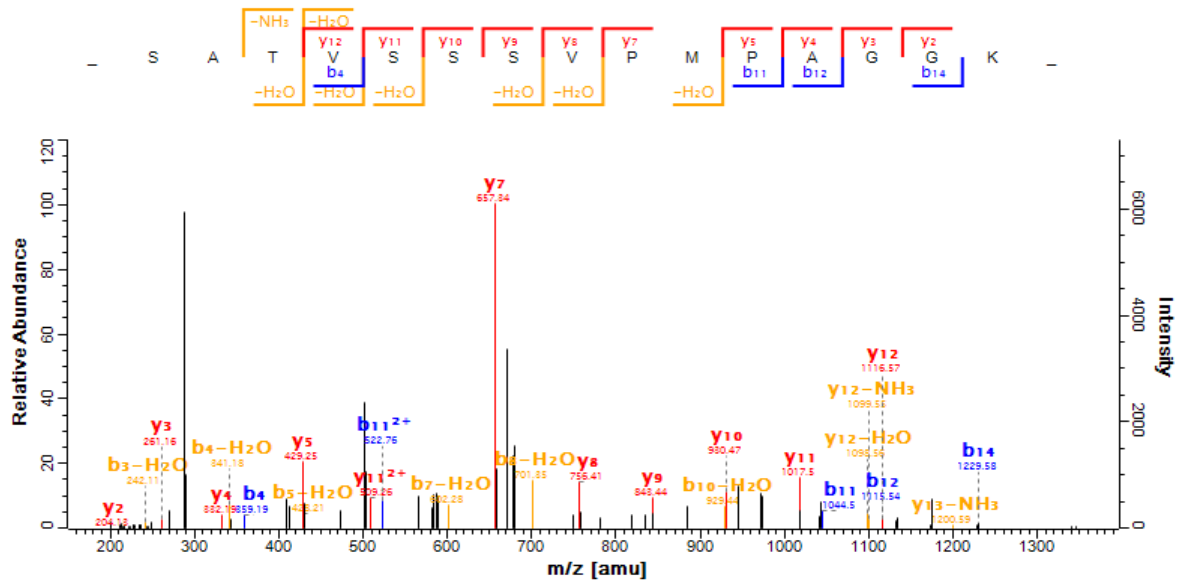

**Protein Group ID:** 4118  
**Protein Accession Numbers:** Q8TBC3; Q8TBC3-2  
**Gene Names:** SHKBP1  
**Peptide Sequence:** DETGAIFIDRDPTVFAPILNFLR  
**Total Number of Spectra:** 1  
**Number of Replicates (out of 8):** 1  
**Best Match Score:** 90.453  
**Best Match Posterior Error Probability:** 5.36E-05  
**Best Match Spectrum:**

**Scan number** 92671      **Raw file** A549-US-Mock-top20CID-Elite-2ug-B13  
**Method** ITMS; CID      **Genenames** SHKBP1

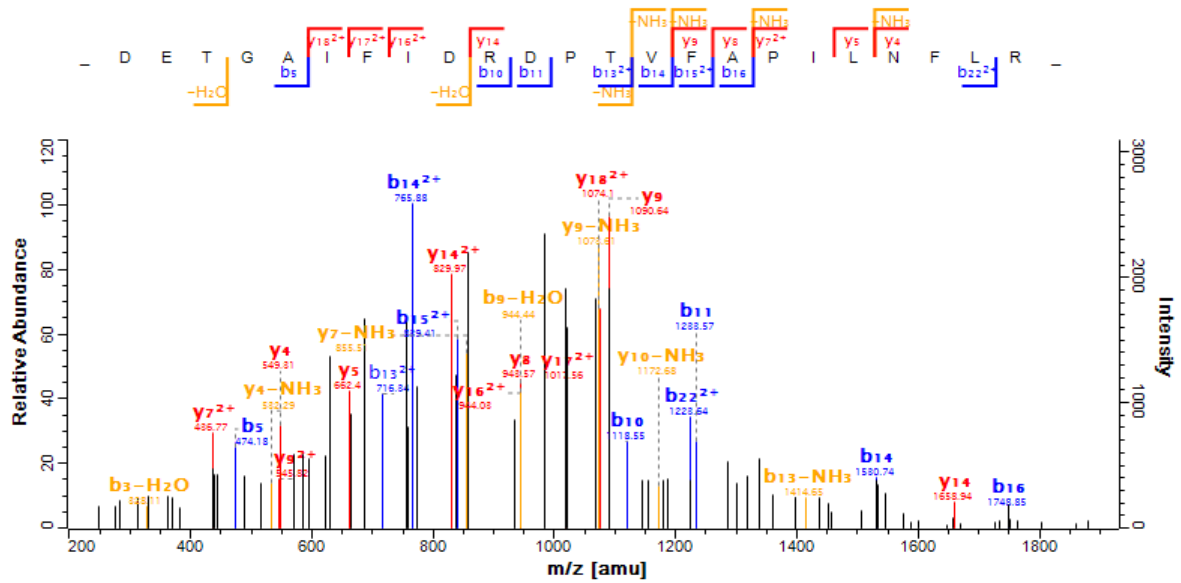

**Protein Group ID:** 4120  
**Protein Accession Numbers:** Q8TBE9  
**Gene Names:** NANP  
**Peptide Sequence:** TSHWEEAIQETK  
**Total Number of Spectra:** 2  
**Number of Replicates (out of 8):** 2  
**Best Match Score:** 78.964  
**Best Match Posterior Error Probability:** 0.0036036  
**Best Match Spectrum:**

**Scan number** 24826      **Raw file** A549-US-WT-top20CID-Elite-2ug-B13  
**Method** ITMS; CID      **Genenames** NANP

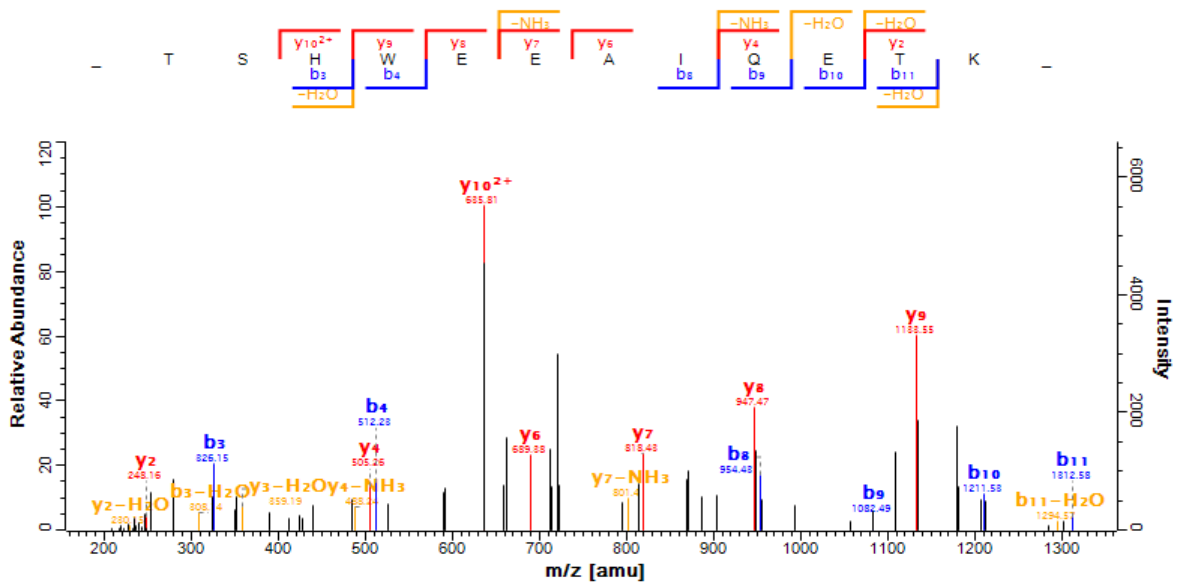

**Protein Group ID:** 4122  
**Protein Accession Numbers:** Q8TBQ9  
**Gene Names:** TMEM167A  
**Peptide Sequence:** TGLLGIFWK  
**Total Number of Spectra:** 8  
**Number of Replicates (out of 8):** 8  
**Best Match Score:** 175.51  
**Best Match Posterior Error Probability:** 2.23E-06  
**Best Match Spectrum:**

**Scan number** 77772      **Raw file** A549-US-Mock-top20CID-Elite-2ug-B12  
**Method** ITMS; CID      **Genenames** TMEM167A

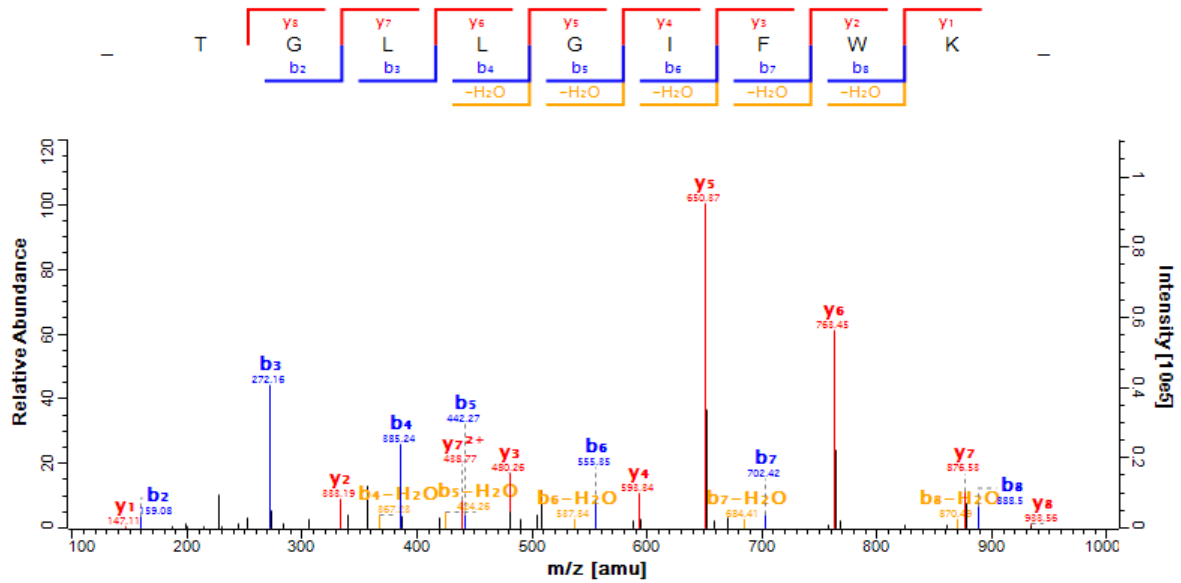

**Protein Group ID:** 4132

**Protein Accession Numbers:** Q8TD08; Q8TD08-3; Q8TD08-2

**Gene Names:** MAPK15

**Peptide Sequence:** LCDDFGLAR

**Total Number of Spectra:** 7

**Number of Replicates (out of 8):** 7

**Best Match Score:** 117.04

**Best Match Posterior Error Probability:** 0.002303

**Best Match Spectrum:**

|                    |           |                  |                                     |
|--------------------|-----------|------------------|-------------------------------------|
| <b>Scan number</b> | 32624     | <b>Raw file</b>  | A549-US-Mock-top20CID-Elite-2ug-B12 |
| <b>Method</b>      | ITMS; CID | <b>Genenames</b> | MAPK15                              |

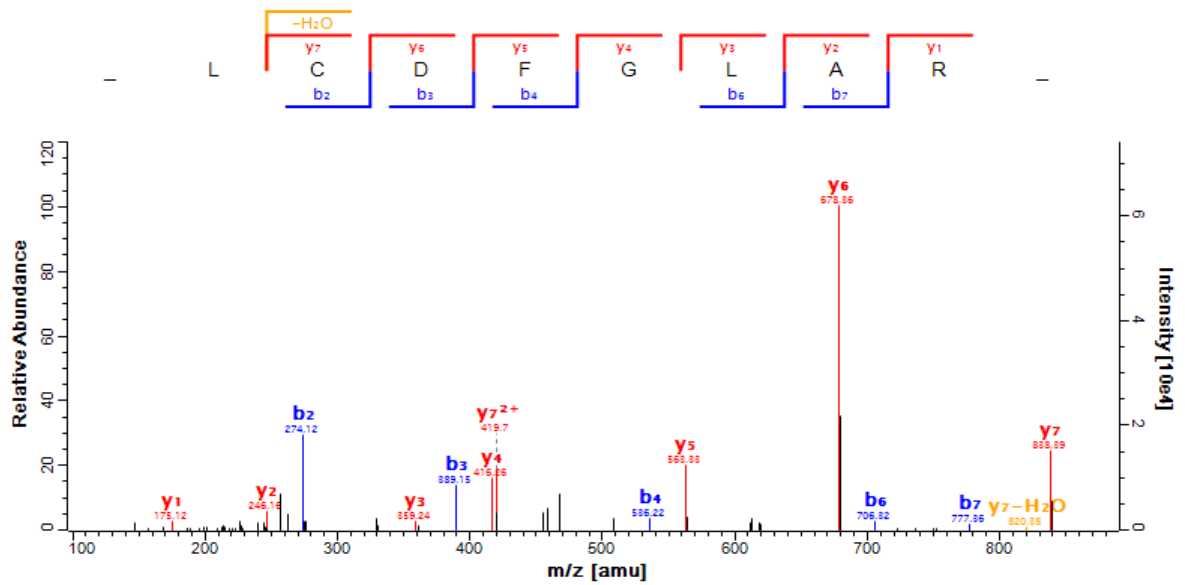

**Protein Group ID:** 4146  
**Protein Accession Numbers:** Q8TEQ8; Q8TEQ8-2  
**Gene Names:** PIGO  
**Peptide Sequence:** VRPEEEEEPLMEMR  
**Total Number of Spectra:** 1  
**Number of Replicates (out of 8):** 1  
**Best Match Score:** 95.067  
**Best Match Posterior Error Probability:** 0.0032572  
**Best Match Spectrum:**

**Scan number** 35508      **Raw file** A549-US-Mock-top20CID-Elite-2ug-B14  
**Method** ITMS; CID      **Genenames** PIGO

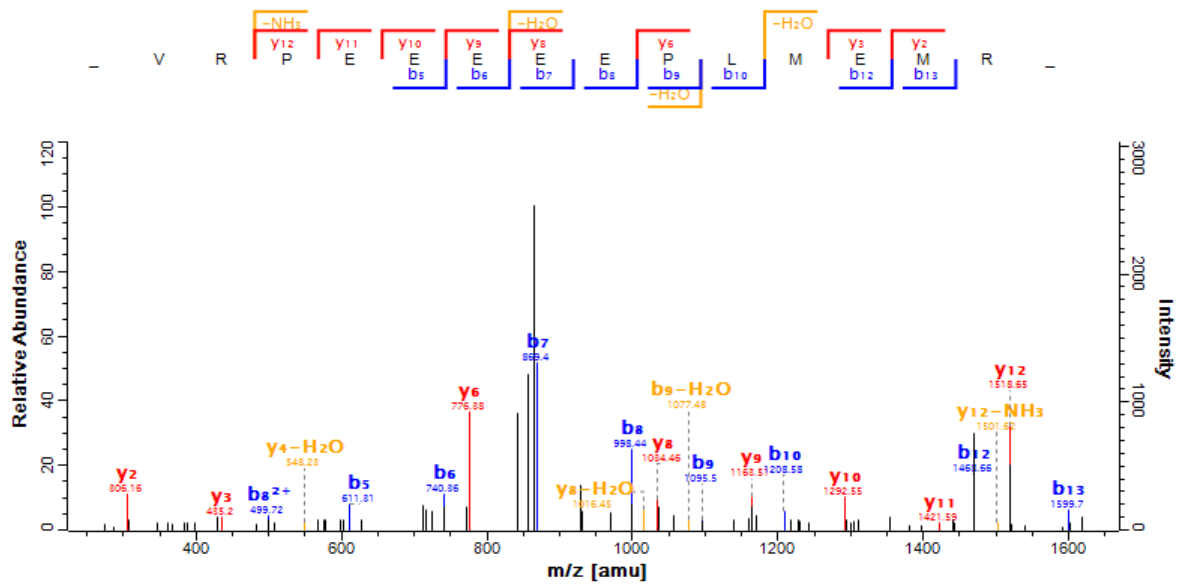



**Protein Group ID:** 4150  
**Protein Accession Numbers:** Q8TF01  
**Gene Names:** PNISR  
**Peptide Sequence:** TPNETTSVLEPK  
**Total Number of Spectra:** 3  
**Number of Replicates (out of 8):** 3  
**Best Match Score:** 111.79  
**Best Match Posterior Error Probability:** 0.00023896  
**Best Match Spectrum:**

**Scan number** 20844      **Raw file** A549-US-WT-top20CID-Elite-2ug-B14  
**Method** ITMS; CID      **Genenames** PNISR

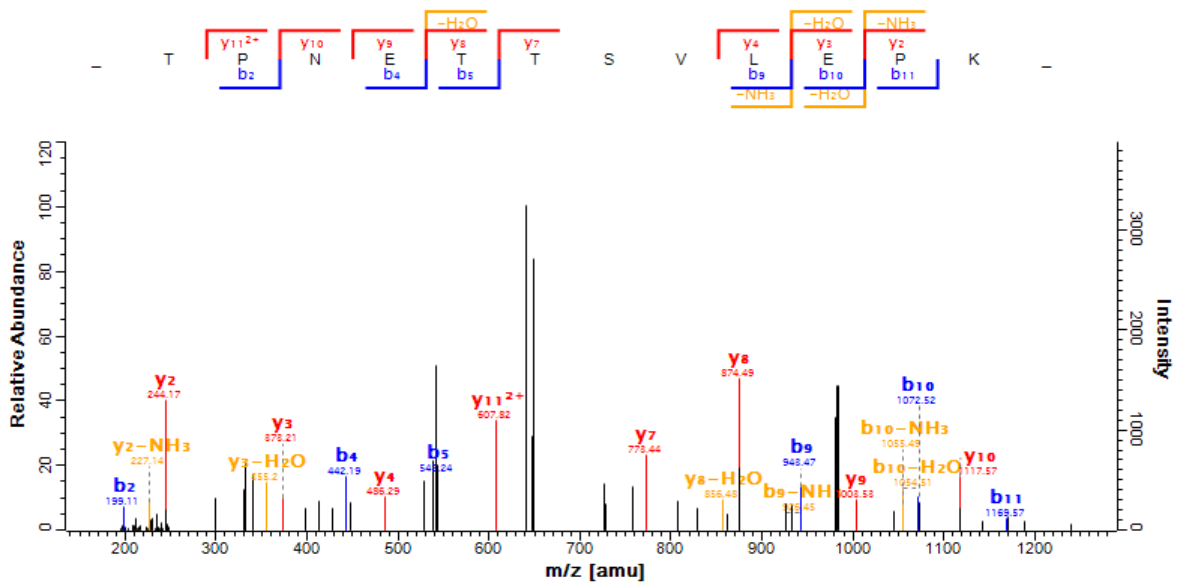

**Protein Group ID:** 4152  
**Protein Accession Numbers:** Q8TF27  
**Gene Names:** AGAP11  
**Peptide Sequence:** QSMGWSNLFTSEK  
**Total Number of Spectra:** 3  
**Number of Replicates (out of 8):** 3  
**Best Match Score:** 98.156  
**Best Match Posterior Error Probability:** 0.00060124  
**Best Match Spectrum:**

**Scan number** 24634      **Raw file** A549-US-Mock-top20CID-Elite-2ug-B14  
**Method** ITMS; CID      **Genenames** AGAP11

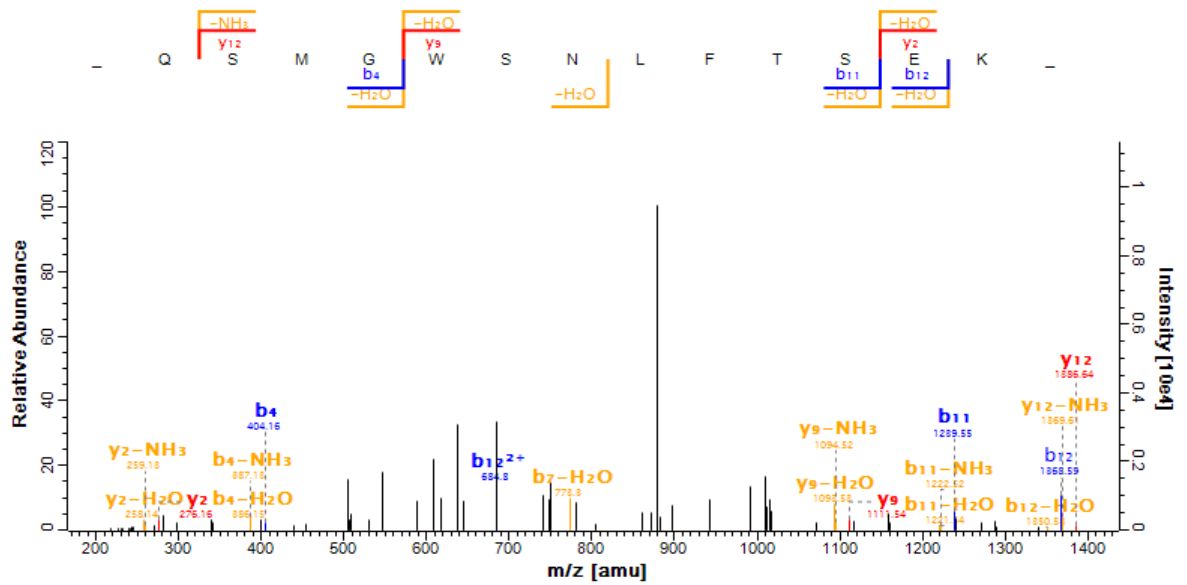

**Protein Group ID:** 4154  
**Protein Accession Numbers:** Q8TF65  
**Gene Names:** GIPC2  
**Peptide Sequence:** LLGGQLGLEDFIFAHVK  
**Total Number of Spectra:** 5  
**Number of Replicates (out of 8):** 5  
**Best Match Score:** 102.5  
**Best Match Posterior Error Probability:** 0.00015486  
**Best Match Spectrum:**

**Scan number** 81711      **Raw file** A549-US-Mock-top20CID-Elite-2ug-B11  
**Method** ITMS; CID      **Genenames** GIPC2

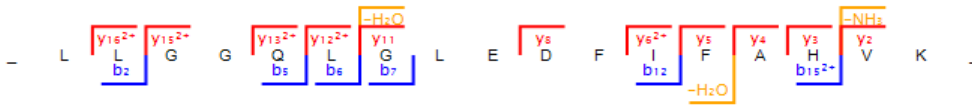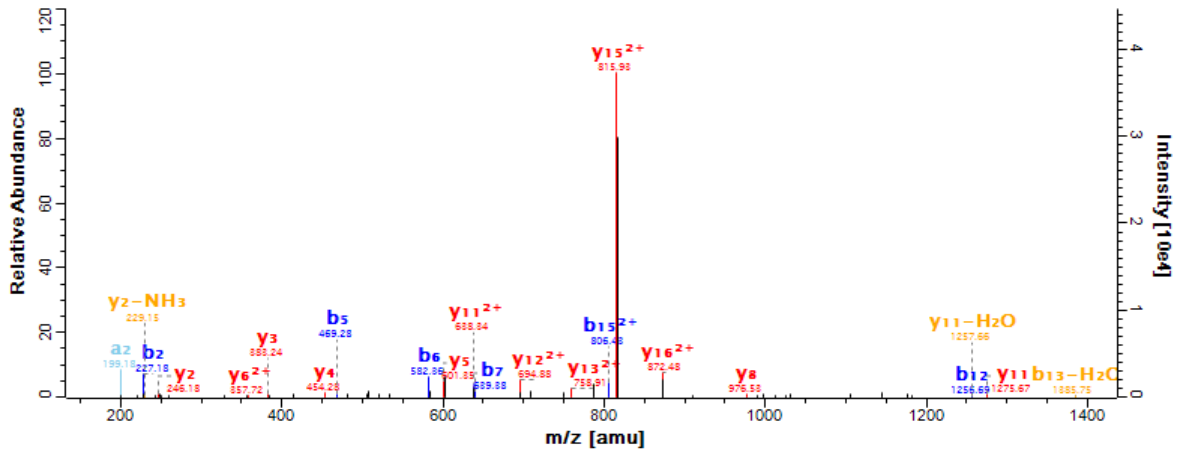

**Protein Group ID:** 4155  
**Protein Accession Numbers:** Q8WTS6  
**Gene Names:** SETD7  
**Peptide Sequence:** SGPEAPEWYQVELK  
**Total Number of Spectra:** 7  
**Number of Replicates (out of 8):** 5  
**Best Match Score:** 148.72  
**Best Match Posterior Error Probability:** 1.77E-06  
**Best Match Spectrum:**

**Scan number** 52730      **Raw file** A549-US-Mock-top20CID-Elite-2ug-B12  
**Method** ITMS; CID      **Genenames** SETD7

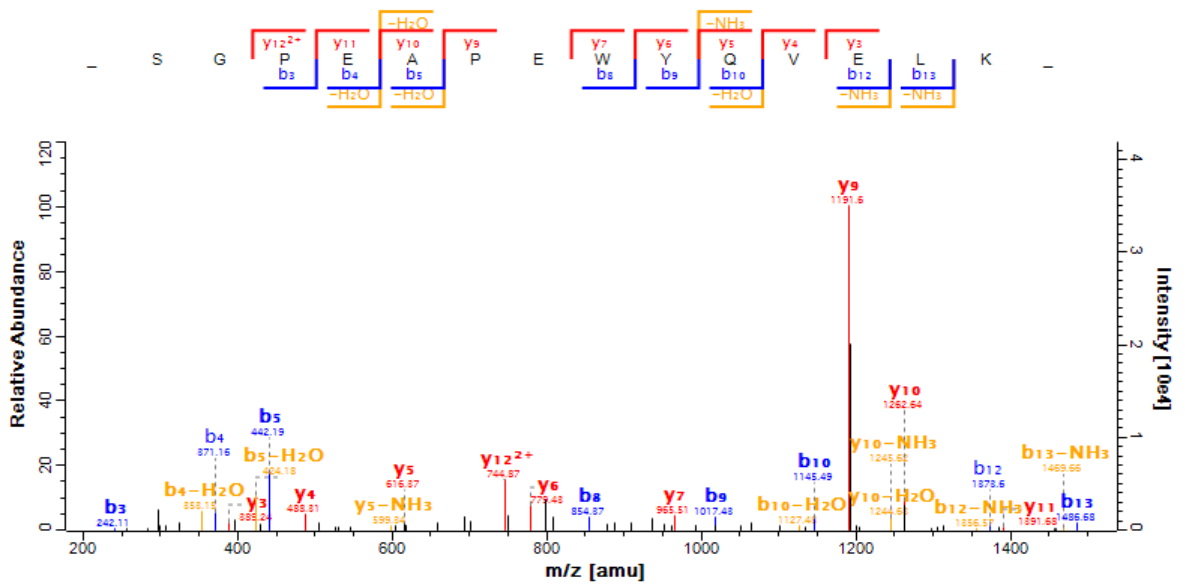

**Protein Group ID:** 4167  
**Protein Accession Numbers:** Q8WUX2  
**Gene Names:** CHAC2  
**Peptide Sequence:** NTEYLFELANSIR  
**Total Number of Spectra:** 3  
**Number of Replicates (out of 8):** 3  
**Best Match Score:** 152.47  
**Best Match Posterior Error Probability:** 8.74E-07  
**Best Match Spectrum:**

**Scan number** 73384      **Raw file** A549-US-Mock-top20CID-Elite-2ug-B14  
**Method** ITMS; CID      **Genenames** CHAC2

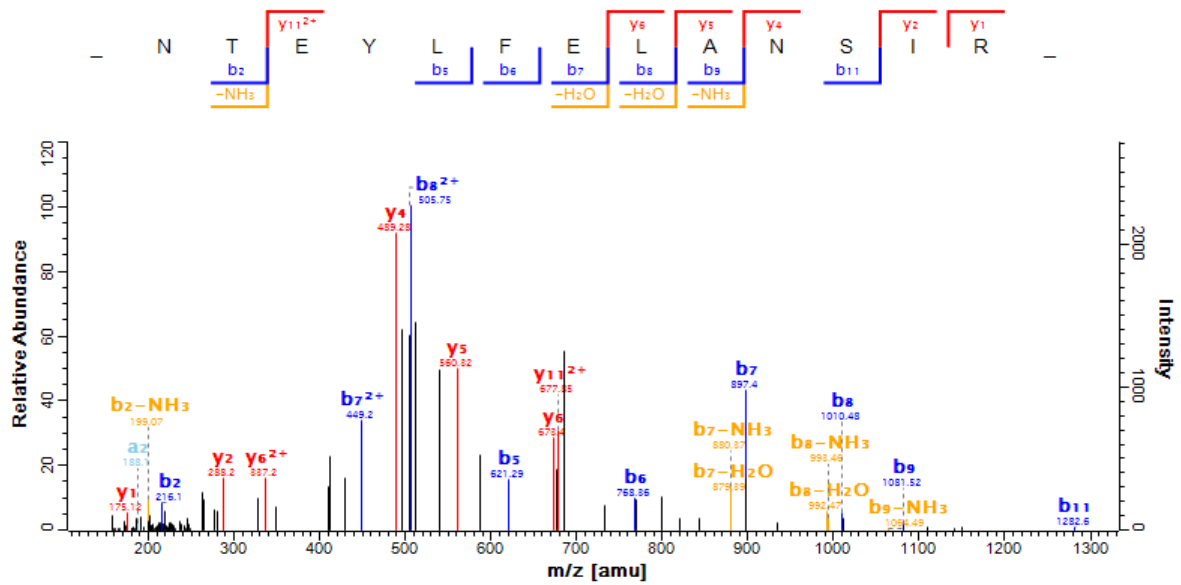

**Protein Group ID:** 4169  
**Protein Accession Numbers:** Q8WV44; Q8WV44-3  
**Gene Names:** TRIM41  
**Peptide Sequence:** VGPGSSVGS GDASSSR  
**Total Number of Spectra:** 1  
**Number of Replicates (out of 8):** 1  
**Best Match Score:** 75.376  
**Best Match Posterior Error Probability:** 0.0023392  
**Best Match Spectrum:**

**Scan number** 6229      **Raw file** A549-US-WT-top20CID-Elite-2ug-B14  
**Method** ITMS; CID      **Genenames** TRIM41

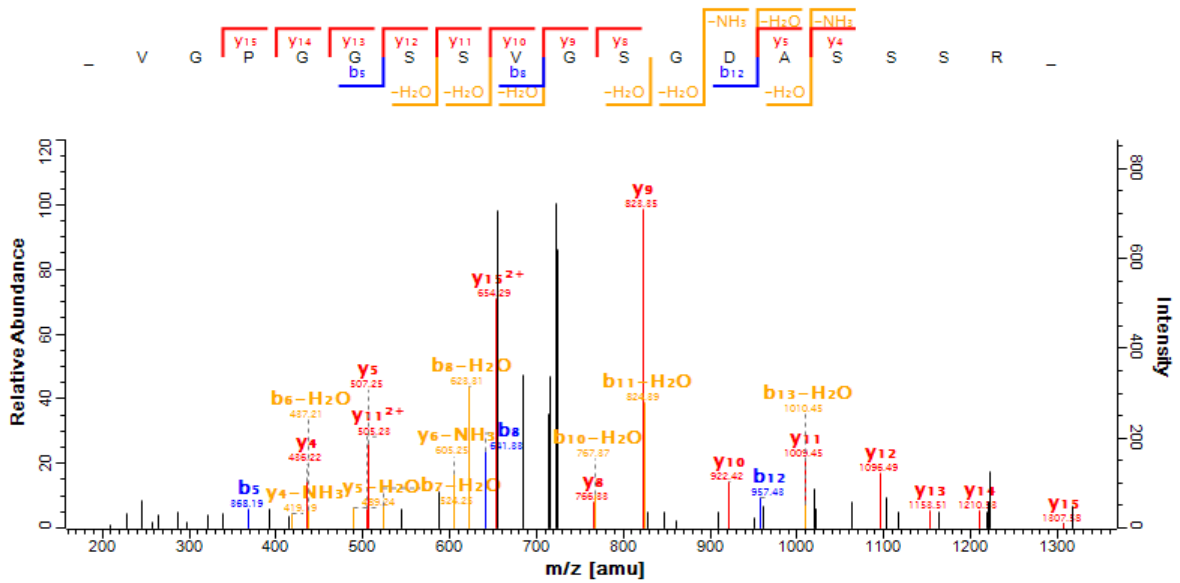

**Protein Group ID:** 4175  
**Protein Accession Numbers:** Q8WVT3  
**Gene Names:** TRAPPC12  
**Peptide Sequence:** EVPGSEARPEQEPVVAEPVPVCTIFSQR  
**Total Number of Spectra:** 3  
**Number of Replicates (out of 8):** 3  
**Best Match Score:** 66.925  
**Best Match Posterior Error Probability:** 0.00030917  
**Best Match Spectrum:**

**Scan number** 58658      **Raw file** A549-US-Mock-top20CID-Elite-2ug-B12  
**Method** ITMS; CID      **Genenames** TRAPPC12

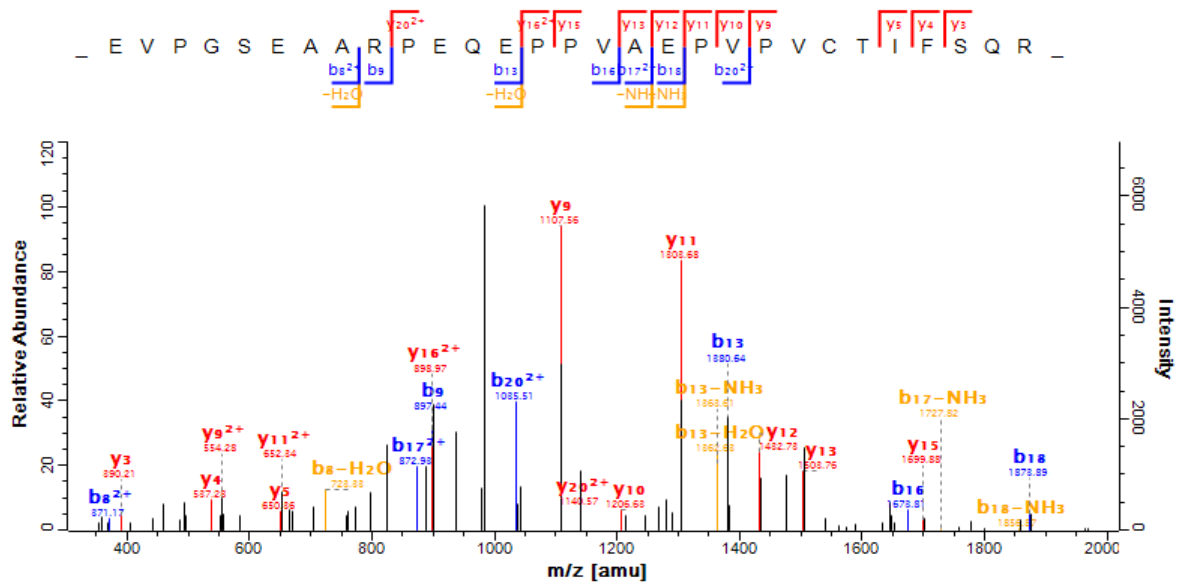

**Protein Group ID:** 4177  
**Protein Accession Numbers:** Q8WVX3-2; Q8WVX3  
**Gene Names:** C4orf3  
**Peptide Sequence:** QNF DV RP QS GANGLPK  
**Total Number of Spectra:** 1  
**Number of Replicates (out of 8):** 1  
**Best Match Score:** 99.069  
**Best Match Posterior Error Probability:** 0.0038443  
**Best Match Spectrum:**

**Scan number** 28264      **Raw file** A549-US-WT-top20CID-Elite-2ug-B11  
**Method** ITMS; CID      **Genenames** C4orf3

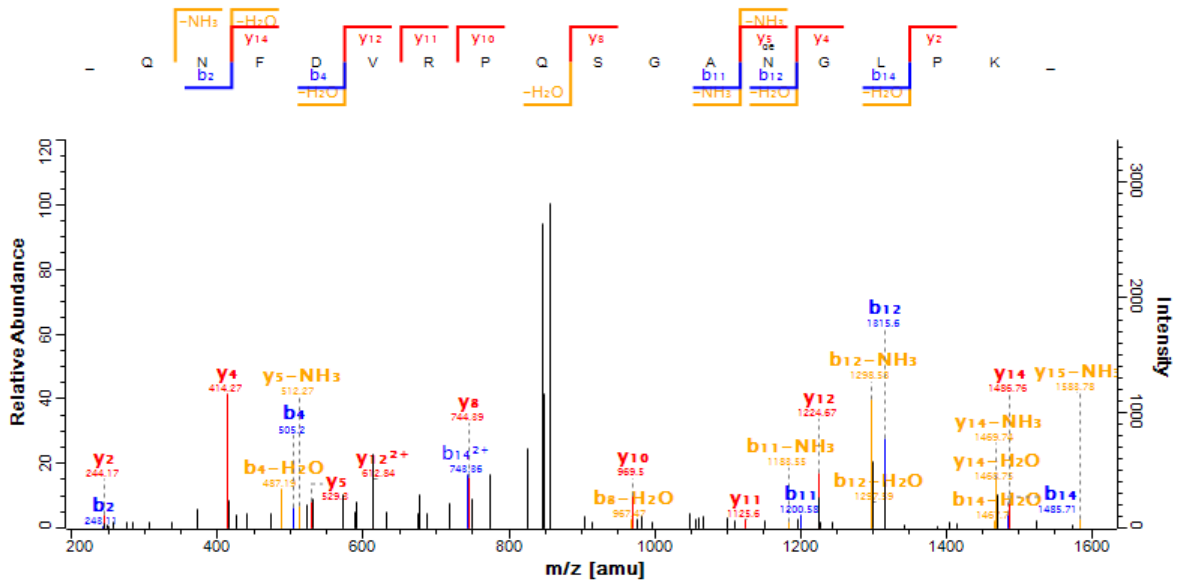



**Protein Group ID:** 4201  
**Protein Accession Numbers:** Q92506  
**Gene Names:** HSD17B8  
**Peptide Sequence:** VGNVGQTNYAASK  
**Total Number of Spectra:** 1  
**Number of Replicates (out of 8):** 1  
**Best Match Score:** 79.466  
**Best Match Posterior Error Probability:** 0.003432  
**Best Match Spectrum:**

**Scan number** 9171      **Raw file** A549-US-WT-top20CID-Elite-2ug-B13  
**Method** ITMS; CID      **Genenames** HSD17B8

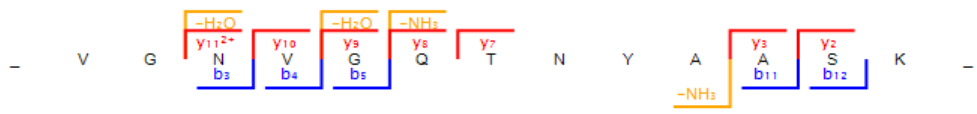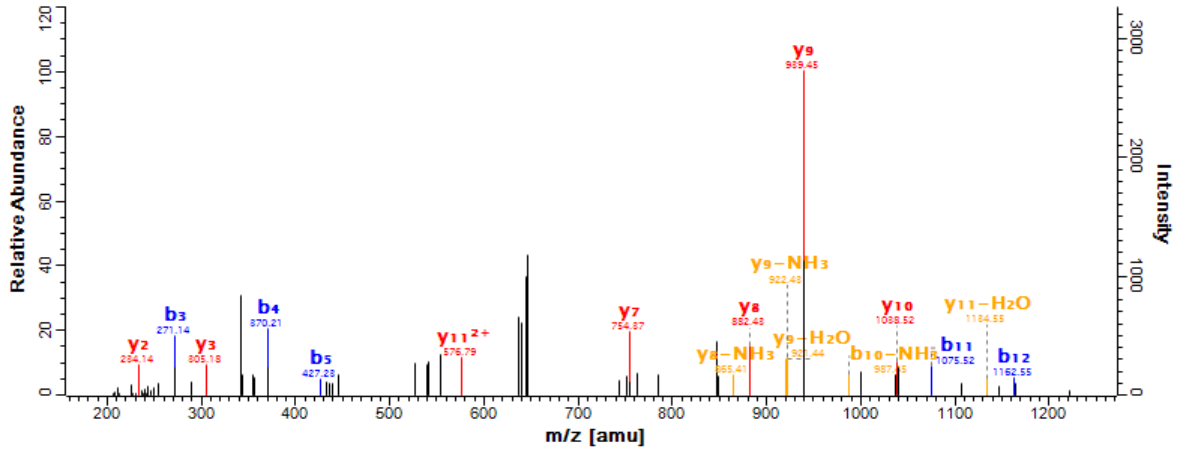

**Protein Group ID:** 4209

**Protein Accession Numbers:** Q92567; Q92567-2; Q92567-3

**Gene Names:** FAM168A

**Peptide Sequence:** MNPVYSPVQPGAPYGNPK

**Total Number of Spectra:** 1

**Number of Replicates (out of 8):** 1

**Best Match Score:** 87.088

**Best Match Posterior Error Probability:** 0.00064564

**Best Match Spectrum:**

**Scan number** 48860      **Raw file** A549-US-Mock-top20CID-Elite-2ug-B11  
**Method** ITMS; CID      **Genenames** FAM168A

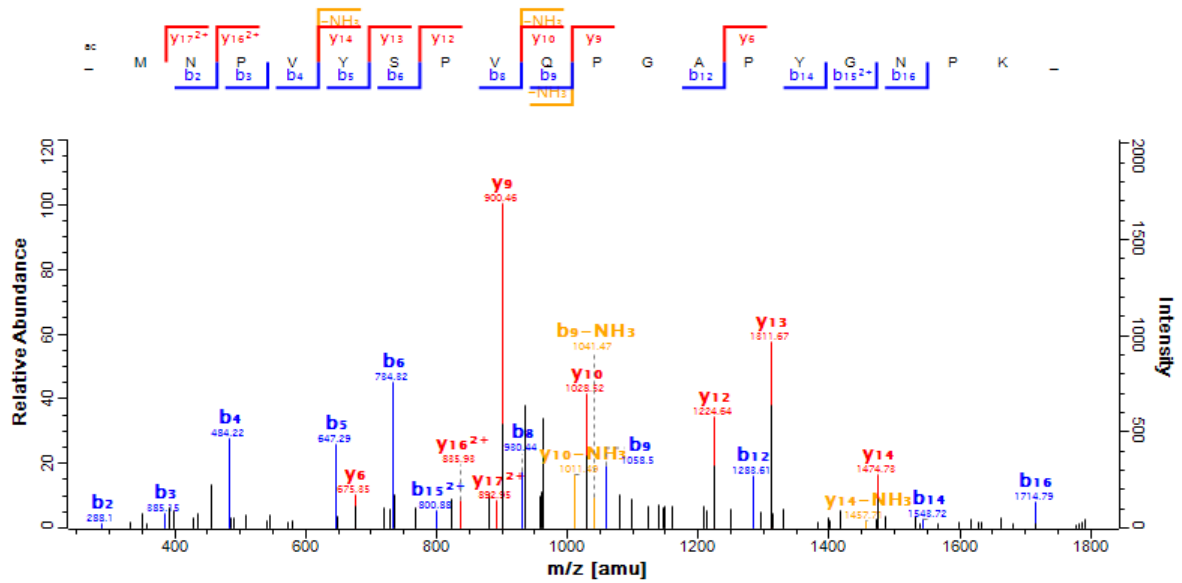

**Protein Group ID:** 4230

**Protein Accession Numbers:** Q92766-2; Q92766; Q92766-4

**Gene Names:** RREB1

**Peptide Sequence:** LAEGDGEAGAGGAASQEQK

**Total Number of Spectra:** 2

**Number of Replicates (out of 8):** 1

**Best Match Score:** 67.43

**Best Match Posterior Error Probability:** 0.0034351

**Best Match Spectrum:**

|                    |           |                  |                                   |
|--------------------|-----------|------------------|-----------------------------------|
| <b>Scan number</b> | 7629      | <b>Raw file</b>  | A549-US-WT-top20CID-Elite-2ug-B12 |
| <b>Method</b>      | ITMS; CID | <b>Genenames</b> | RREB1                             |

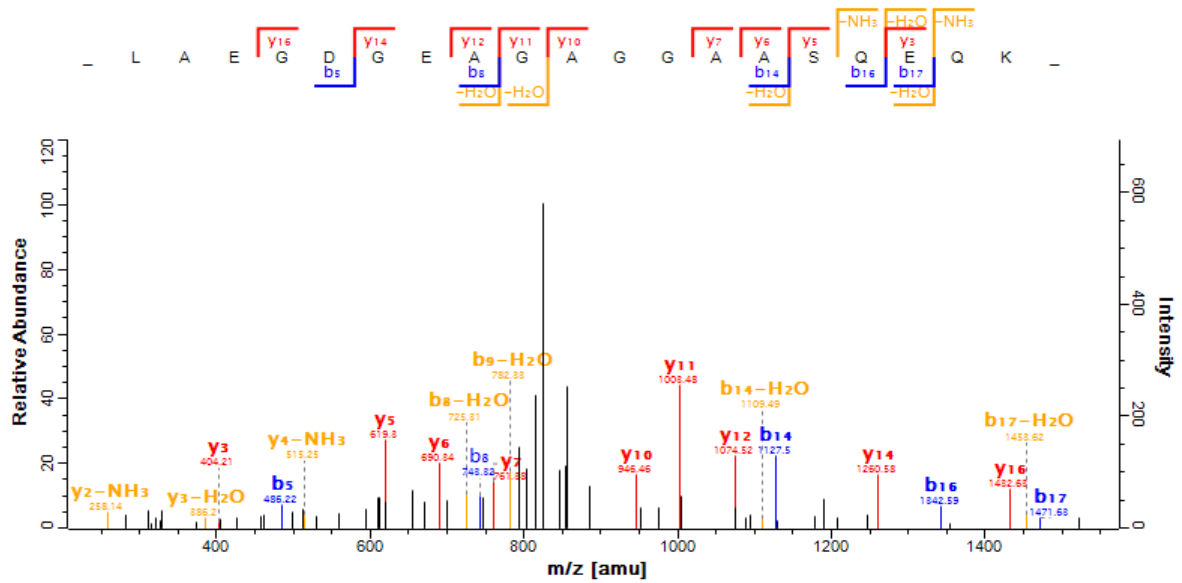

**Protein Group ID:** 4242  
**Protein Accession Numbers:** Q92889  
**Gene Names:** ERCC4  
**Peptide Sequence:** GTASADVSTDTR  
**Total Number of Spectra:** 6  
**Number of Replicates (out of 8):** 6  
**Best Match Score:** 136.38  
**Best Match Posterior Error Probability:** 7.68E-05  
**Best Match Spectrum:**

**Scan number** 4865      **Raw file** A549-US-WT-top20CID-Elite-2ug-B14  
**Method** ITMS; CID      **Genenames** ERCC4

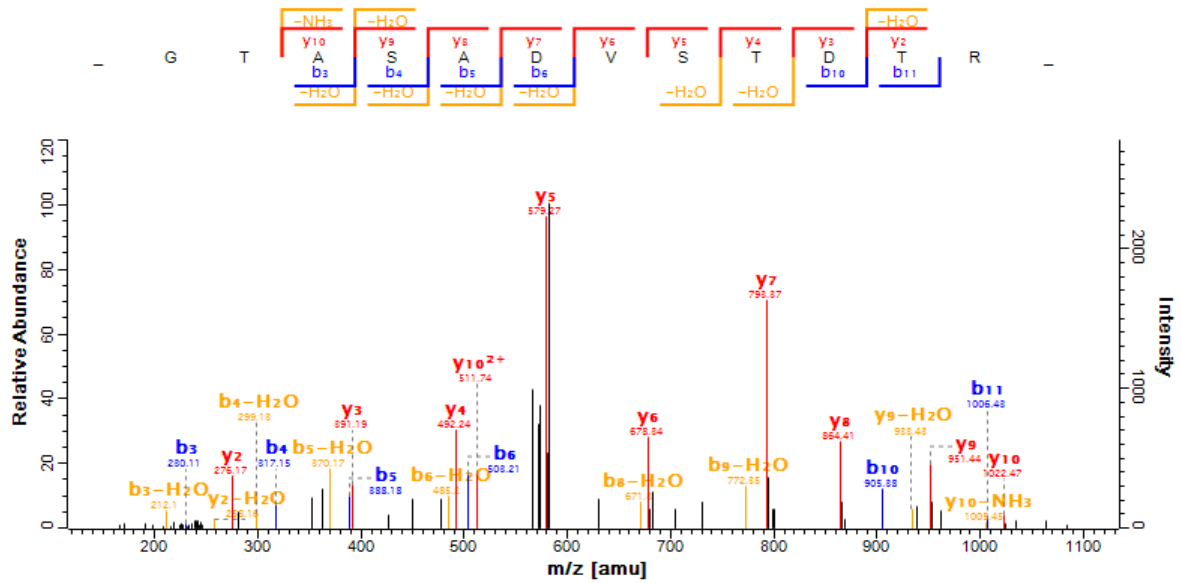

**Protein Group ID:** 4250  
**Protein Accession Numbers:** Q92968  
**Gene Names:** PEX13  
**Peptide Sequence:** FVQQAEESSR  
**Total Number of Spectra:** 5  
**Number of Replicates (out of 8):** 5  
**Best Match Score:** 136.5  
**Best Match Posterior Error Probability:** 9.35E-06  
**Best Match Spectrum:**

**Scan number** 5538      **Raw file** A549-US-Mock-top20CID-Elite-2ug-B14  
**Method** ITMS; CID      **Genenames** PEX13

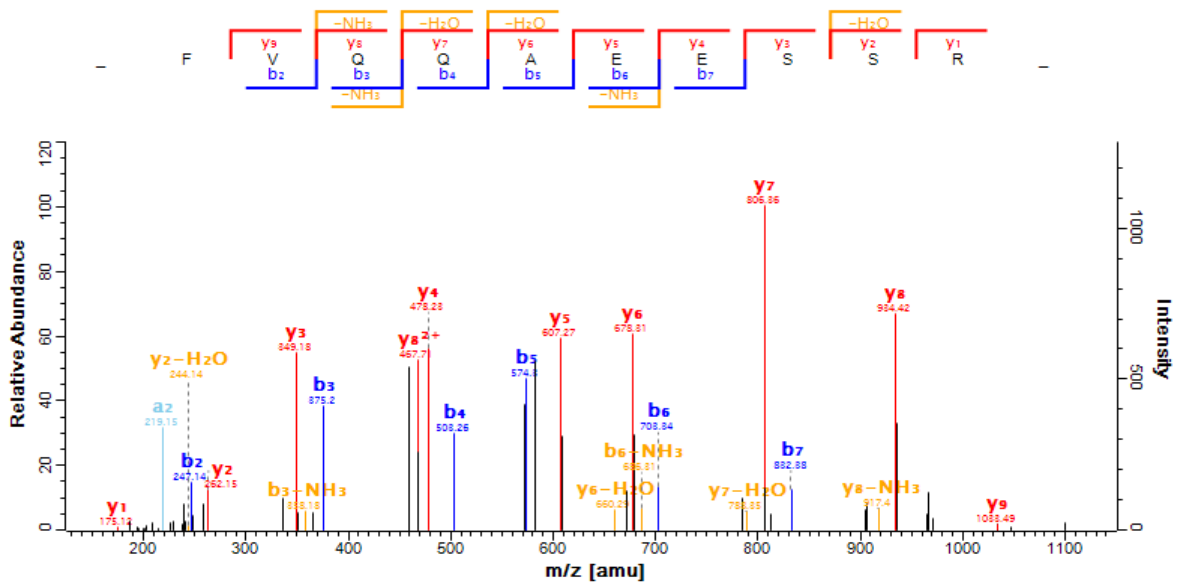

**Protein Group ID:** 4261  
**Protein Accession Numbers:** Q969E8  
**Gene Names:** TSR2  
**Peptide Sequence:** WLGGAVEDYFM  
**Total Number of Spectra:** 9  
**Number of Replicates (out of 8):** 8  
**Best Match Score:** 151.98  
**Best Match Posterior Error Probability:** 2.86E-06  
**Best Match Spectrum:**

**Scan number** 73197      **Raw file** A549-US-WT-top20CID-Elite-2ug-B11  
**Method** ITMS; CID      **Genenames** TSR2

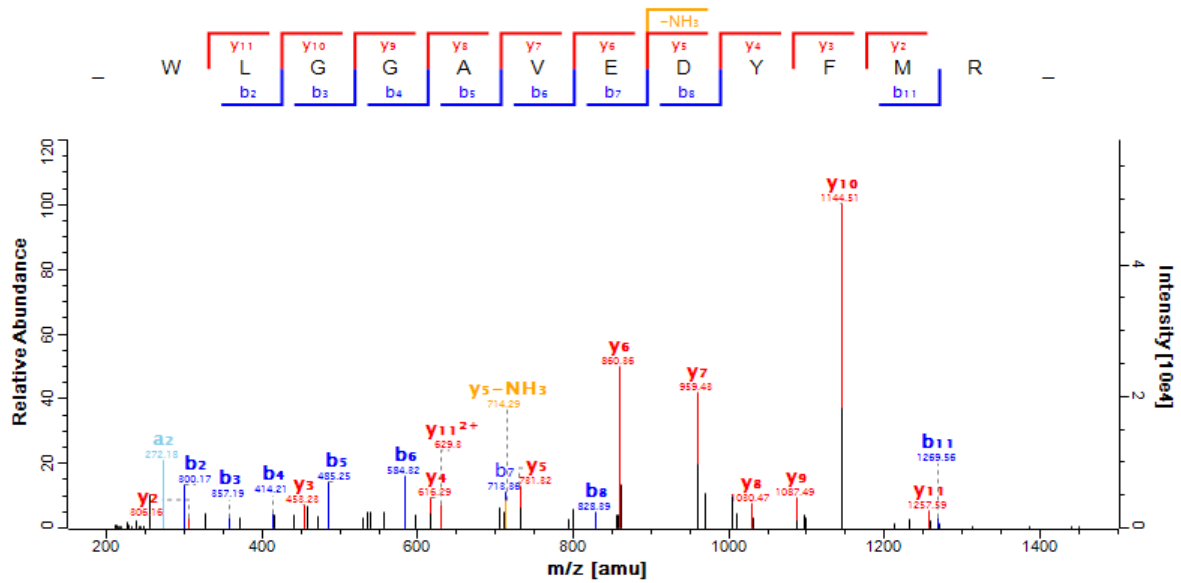



**Protein Group ID:** 4269

**Protein Accession Numbers:** Q969S2; Q969S2-2; Q969S2-3; Q969S2-4

**Gene Names:** NEIL2

**Peptide Sequence:** EVLVDHVVVEFSTAWLQGK

**Total Number of Spectra:** 1

**Number of Replicates (out of 8):** 1

**Best Match Score:** 74.89

**Best Match Posterior Error Probability:** 0.0019736

**Best Match Spectrum:**

|                    |           |                  |                                     |
|--------------------|-----------|------------------|-------------------------------------|
| <b>Scan number</b> | 84201     | <b>Raw file</b>  | A549-US-Mock-top20CID-Elite-2ug-B14 |
| <b>Method</b>      | ITMS; CID | <b>Genenames</b> | NEIL2                               |

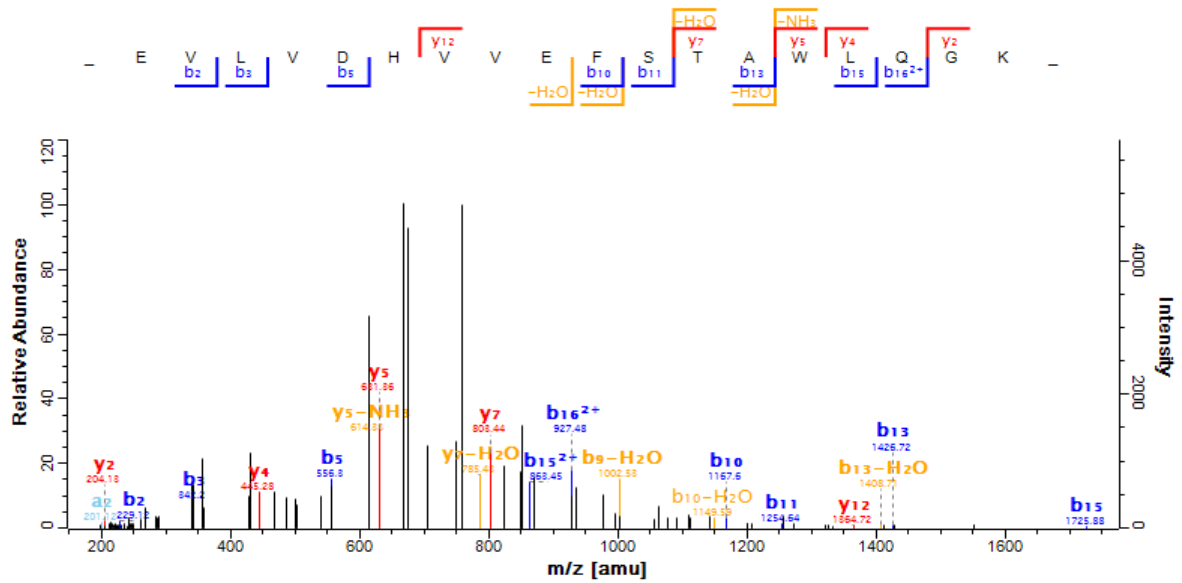



**Protein Group ID:** 4273

**Protein Accession Numbers:** Q969W9; Q969W9-2; Q969W9-3

**Gene Names:** PMEPA1

**Peptide Sequence:** MEGPPPTYSEVIGHYPGSSFQHQSSGPPSLLEGTR

**Total Number of Spectra:** 2

**Number of Replicates (out of 8):** 2

**Best Match Score:** 48.226

**Best Match Posterior Error Probability:** 0.001218

**Best Match Spectrum:**

|                    |           |                  |                                     |
|--------------------|-----------|------------------|-------------------------------------|
| <b>Scan number</b> | 58039     | <b>Raw file</b>  | A549-US-Mock-top20CID-Elite-2ug-B13 |
| <b>Method</b>      | ITMS; CID | <b>Genenames</b> | PMEPA1                              |

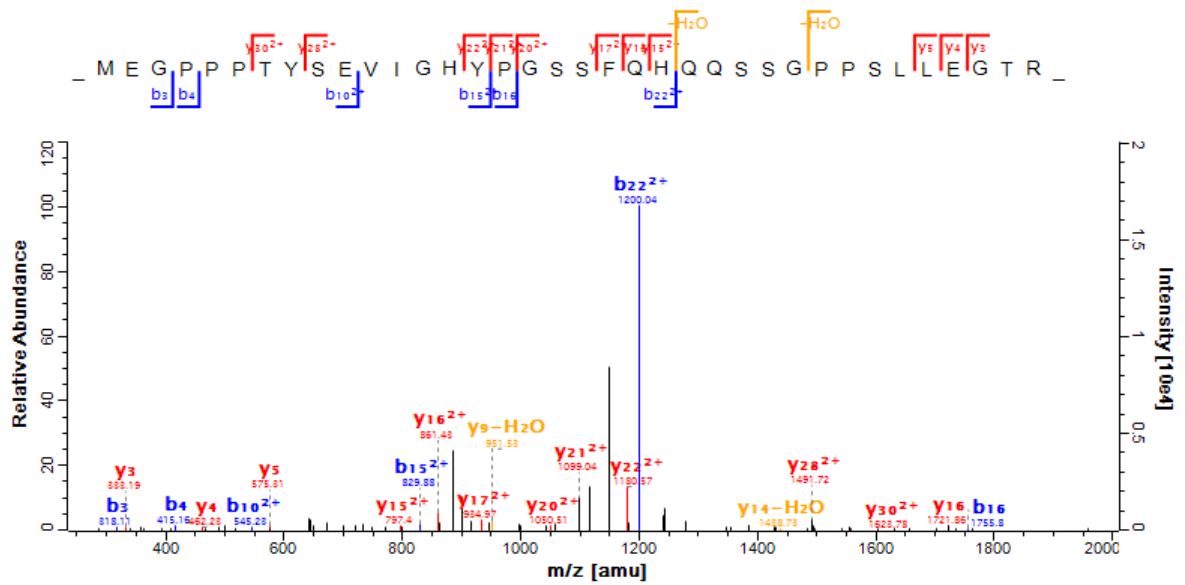

**Protein Group ID:** 4281

**Protein Accession Numbers:** Q96A73; Q96A73-2; Q96A73-3

**Gene Names:** KIAA1191

**Peptide Sequence:** YDSGSFATQAYR

**Total Number of Spectra:** 1

**Number of Replicates (out of 8):** 1

**Best Match Score:** 87.719

**Best Match Posterior Error Probability:** 0.0016615

**Best Match Spectrum:**

**Scan number** 26190      **Raw file** A549-US-WT-top20CID-Elite-2ug-812  
**Method** ITMS; CID      **Genenames** KIAA1191

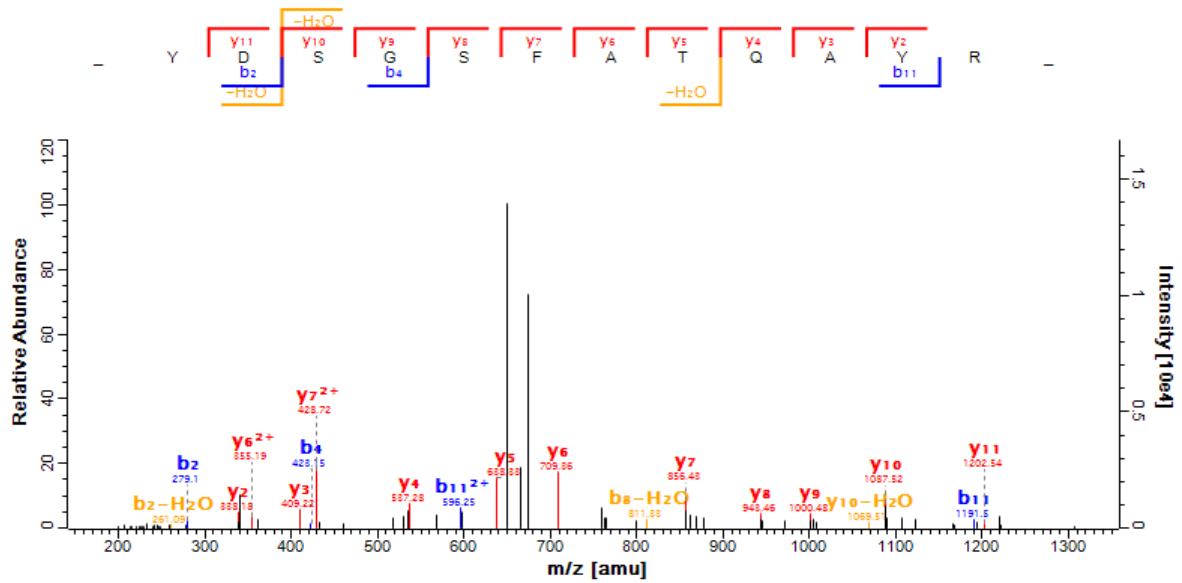

**Protein Group ID:** 4287  
**Protein Accession Numbers:** Q96AQ8  
**Gene Names:** CCDC90A  
**Peptide Sequence:** TEIVALHAQQDR  
**Total Number of Spectra:** 1  
**Number of Replicates (out of 8):** 1  
**Best Match Score:** 113.99  
**Best Match Posterior Error Probability:** 0.0002101  
**Best Match Spectrum:**

**Scan number** 18164      **Raw file** A549-US-WT-top20CID-Elite-2ug-B11  
**Method** ITMS; CID      **Genenames** CCDC90A

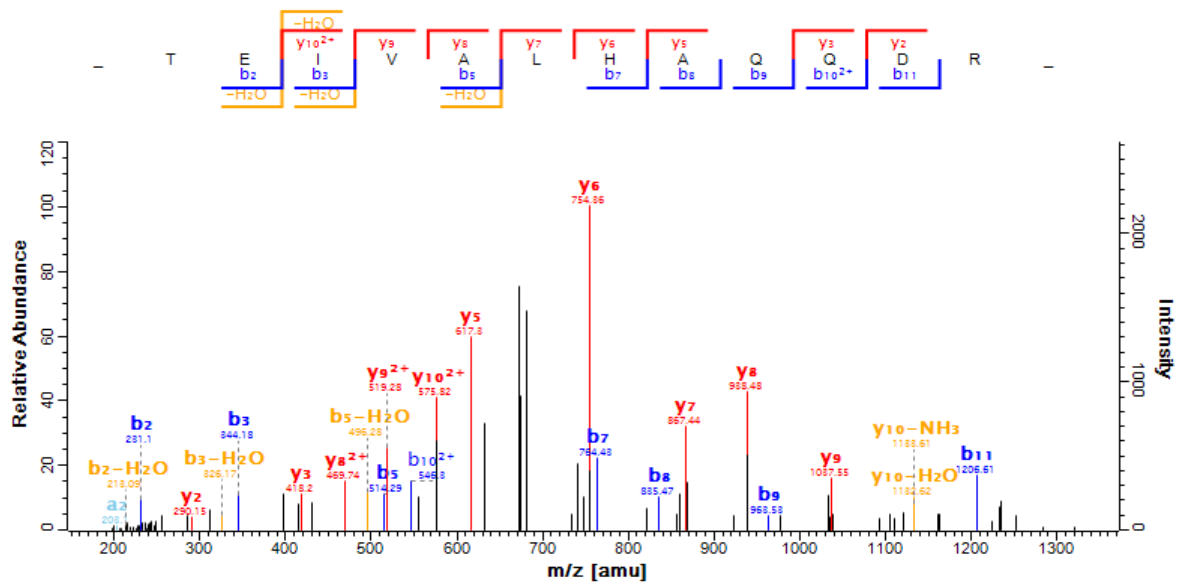

**Protein Group ID:** 4291  
**Protein Accession Numbers:** Q96AY4  
**Gene Names:** TTC28  
**Peptide Sequence:** LASSDTGESDQSSTETDSTVK  
**Total Number of Spectra:** 1  
**Number of Replicates (out of 8):** 1  
**Best Match Score:** 74.048  
**Best Match Posterior Error Probability:** 0.00071085  
**Best Match Spectrum:**

**Scan number** 9099      **Raw file** A549-US-WT-top20CID-Elite-2ug-B11  
**Method** ITMS; CID      **Genenames** TTC28

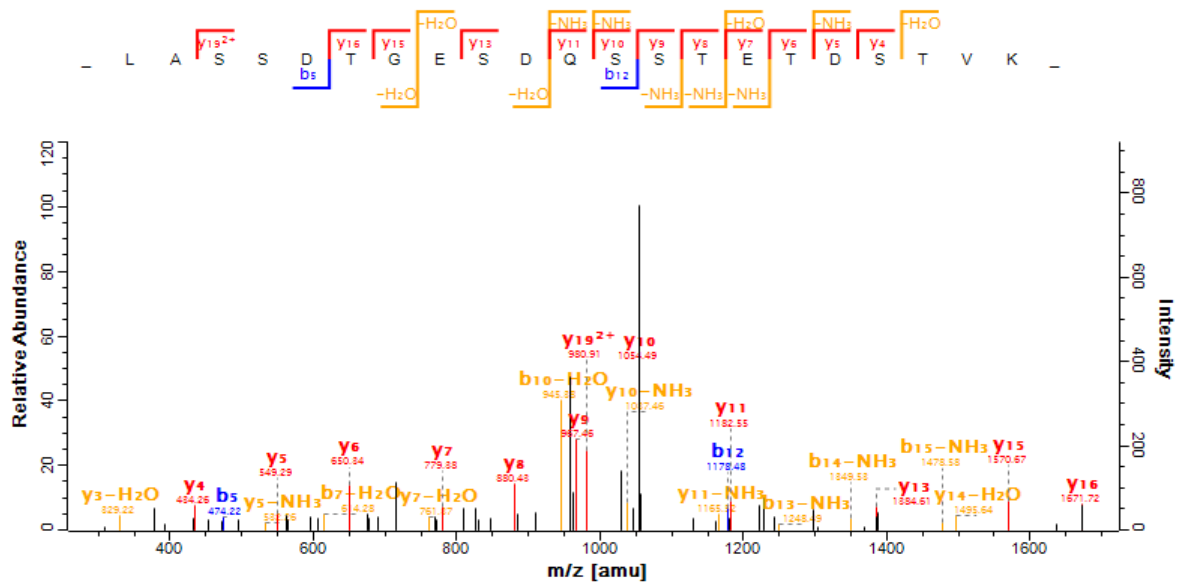

**Protein Group ID:** 4293  
**Protein Accession Numbers:** Q96B23; Q96B23-2  
**Gene Names:** C18orf25  
**Peptide Sequence:** GGVIQSVSSWK  
**Total Number of Spectra:** 2  
**Number of Replicates (out of 8):** 2  
**Best Match Score:** 94.767  
**Best Match Posterior Error Probability:** 0.00098239  
**Best Match Spectrum:**

**Scan number** 38292      **Raw file** A549-US-Mock-top20CID-Elite-2ug-B11  
**Method** ITMS; CID      **Genenames** C18orf25

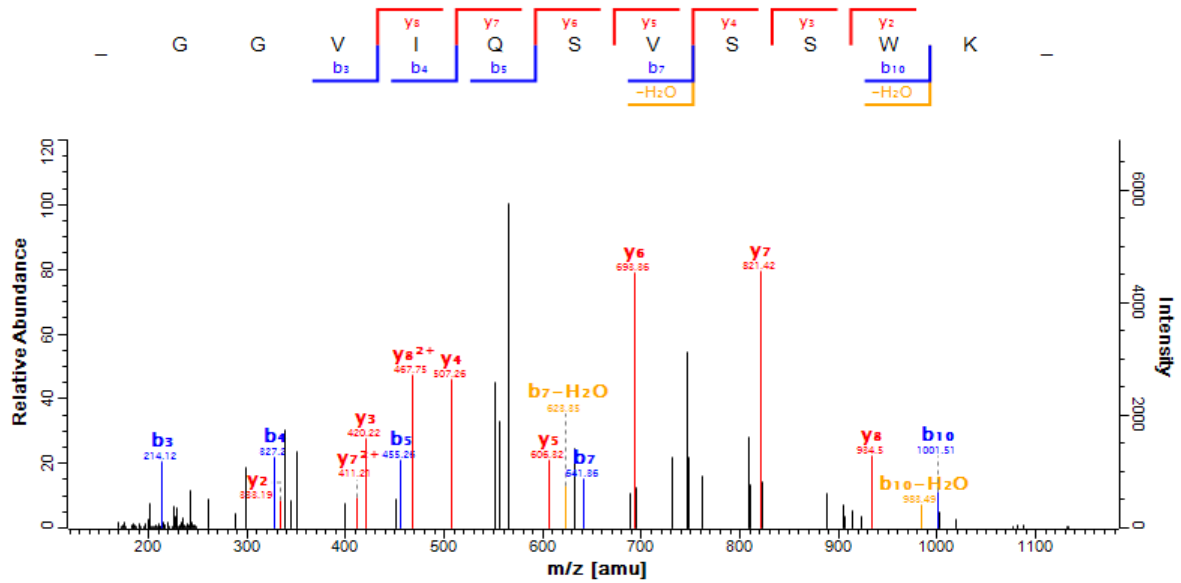

**Protein Group ID:** 4299  
**Protein Accession Numbers:** Q96BM9  
**Gene Names:** ARL8A  
**Peptide Sequence:** MIALFNK  
**Total Number of Spectra:** 2  
**Number of Replicates (out of 8):** 2  
**Best Match Score:** 126.68  
**Best Match Posterior Error Probability:** 0.0014942  
**Best Match Spectrum:**

**Scan number** 70938      **Raw file** A549-US-WT-top20CID-Elite-2ug-B13  
**Method** ITMS; CID      **Genenames** ARL8A

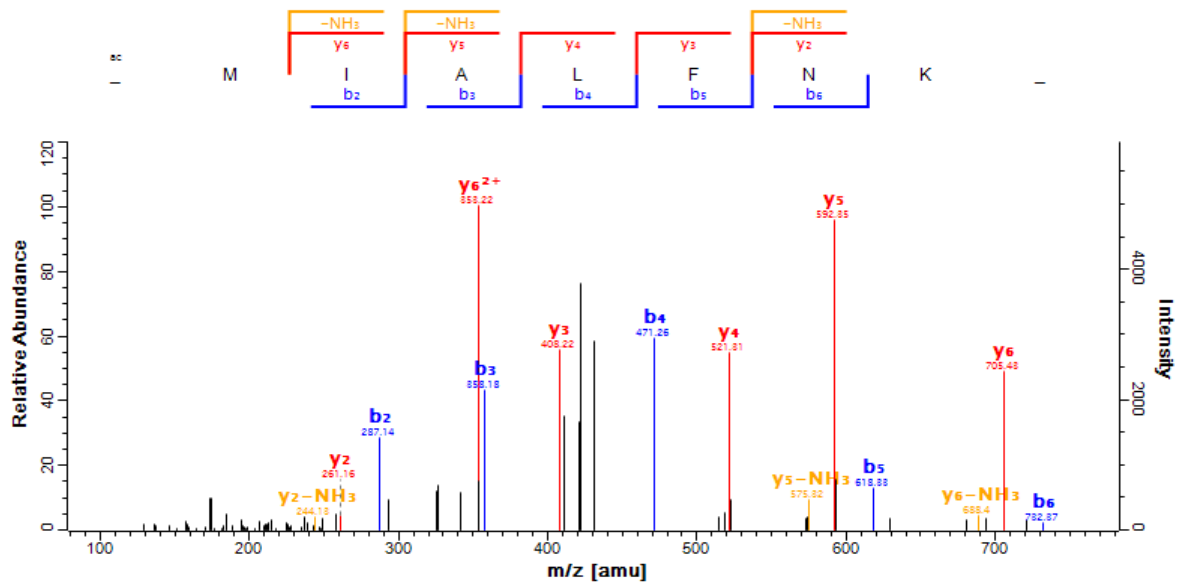

**Protein Group ID:** 4300  
**Protein Accession Numbers:** Q96BN8  
**Gene Names:** FAM105B  
**Peptide Sequence:** EVPFFSVLLFAR  
**Total Number of Spectra:** 5  
**Number of Replicates (out of 8):** 5  
**Best Match Score:** 153.95  
**Best Match Posterior Error Probability:** 1.75E-06  
**Best Match Spectrum:**

**Scan number** 89912      **Raw file** A549-US-Mock-top20CID-Elite-2ug-B11  
**Method** ITMS; CID      **Genenames** FAM105B

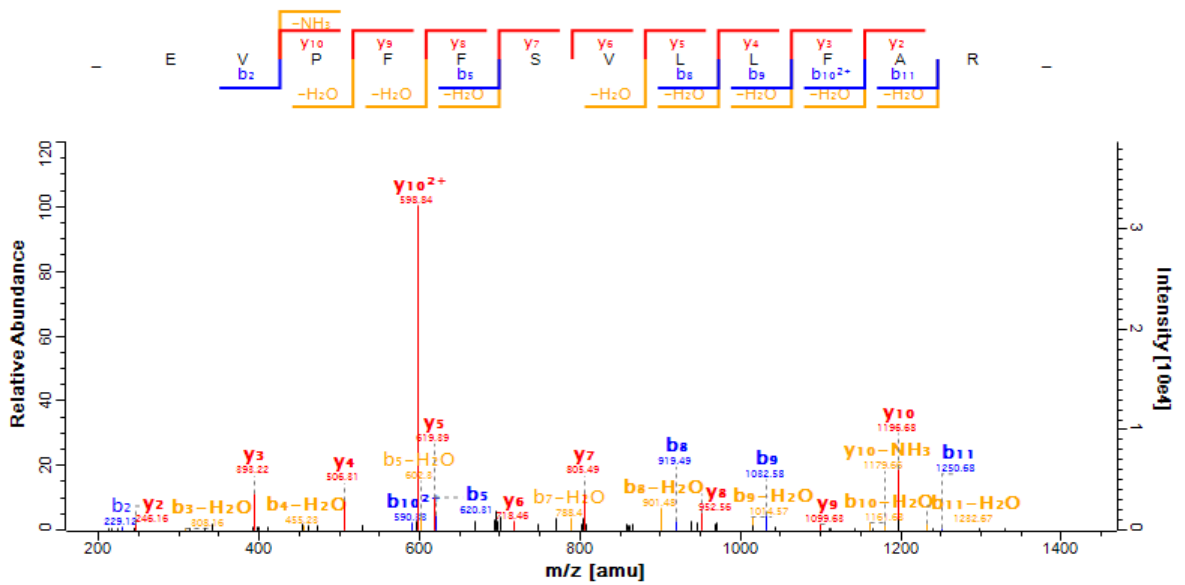

**Protein Group ID:** 4303

**Protein Accession Numbers:** Q96BW5; Q96BW5-2

**Gene Names:** PTER

**Peptide Sequence:** AMSVEQLTDVLMNEILHGADGTSIK

**Total Number of Spectra:** 5

**Number of Replicates (out of 8):** 5

**Best Match Score:** 97.457

**Best Match Posterior Error Probability:** 1.91E-06

**Best Match Spectrum:**

|                    |           |                  |                                   |
|--------------------|-----------|------------------|-----------------------------------|
| <b>Scan number</b> | 95442     | <b>Raw file</b>  | A549-US-WT-top20CID-Elite-2ug-B11 |
| <b>Method</b>      | ITMS; CID | <b>Genenames</b> | PTER                              |

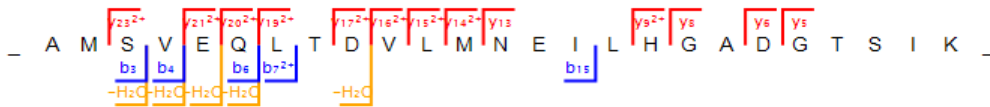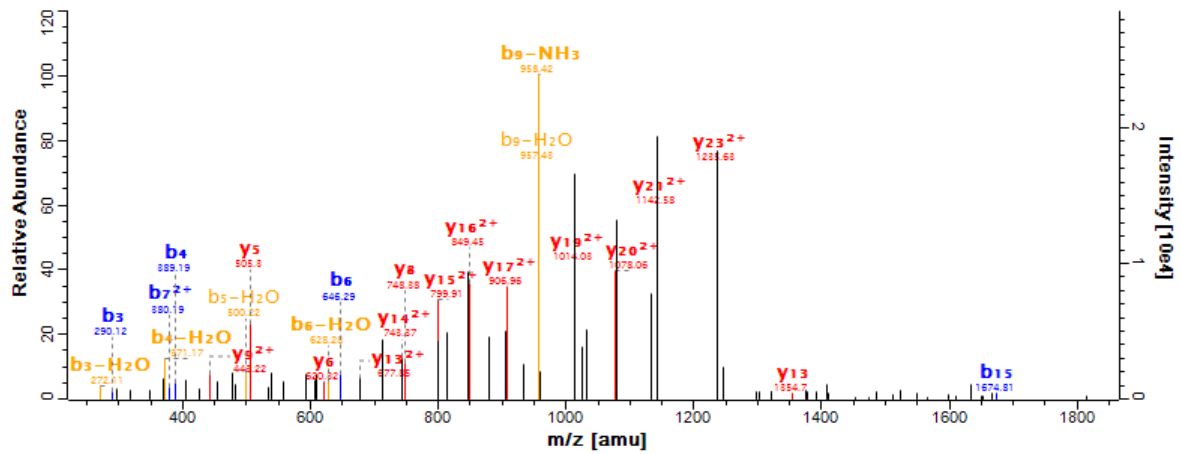



**Protein Group ID:** 4310

**Protein Accession Numbers:** Q96CB9; Q96CB9-4; Q96CB9-3

**Gene Names:** NSUN4

**Peptide Sequence:** VLVDVPCTTDR

**Total Number of Spectra:** 1

**Number of Replicates (out of 8):** 1

**Best Match Score:** 82.261

**Best Match Posterior Error Probability:** 0.0032473

**Best Match Spectrum:**

**Scan number** 30992      **Raw file** A549-US-WT-top20CID-Elite-2ug-B11  
**Method** ITMS; CID      **Genenames** NSUN4

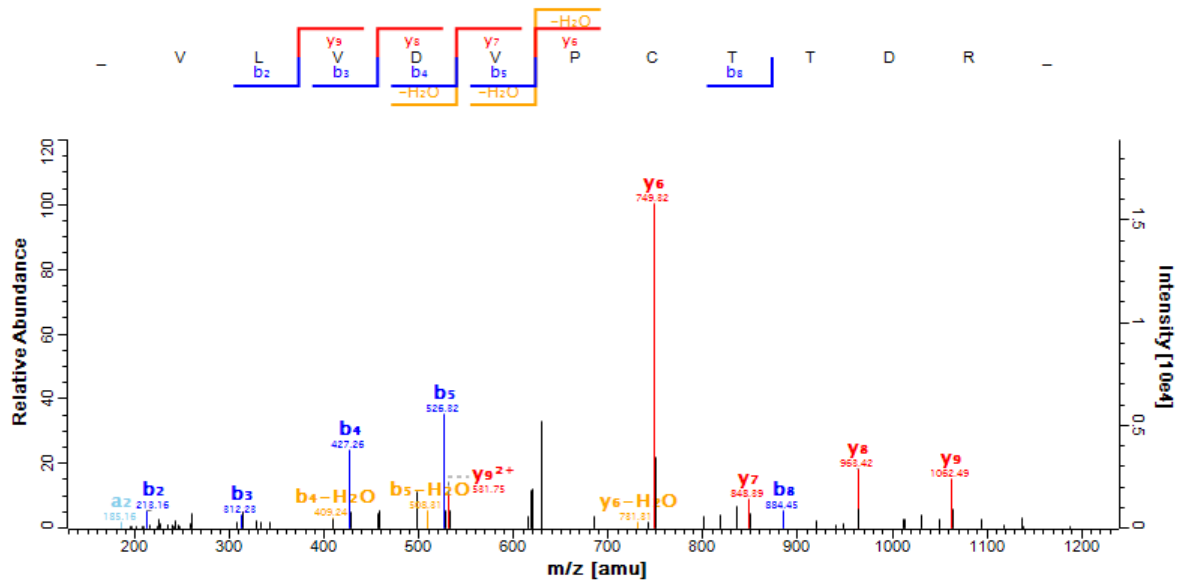

**Protein Group ID:** 4316  
**Protein Accession Numbers:** Q96CW5; Q96CW5-2; Q96CW5-3  
**Gene Names:** TUBGCP3  
**Peptide Sequence:** DILYVFQIDGK  
**Total Number of Spectra:** 1  
**Number of Replicates (out of 8):** 1  
**Best Match Score:** 89.46  
**Best Match Posterior Error Probability:** 0.0014863  
**Best Match Spectrum:**

**Scan number** 68824      **Raw file** A549-US-Mock-top20CID-Elite-2ug-B11  
**Method** ITMS; CID      **Genenames** TUBGCP3

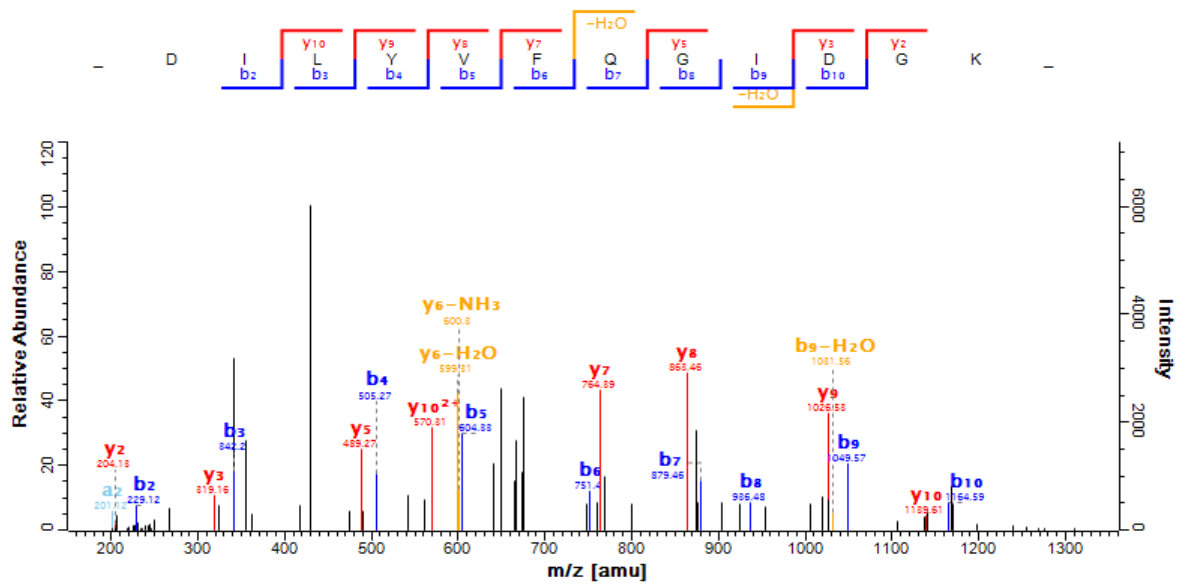

**Protein Group ID:** 4317  
**Protein Accession Numbers:** Q96CX2  
**Gene Names:** KCTD12  
**Peptide Sequence:** MFTQQQPQELAR  
**Total Number of Spectra:** 2  
**Number of Replicates (out of 8):** 2  
**Best Match Score:** 94.122  
**Best Match Posterior Error Probability:** 0.0010171  
**Best Match Spectrum:**

**Scan number** 27106      **Raw file** A549-US-Mock-top20CID-Elite-2ug-B14  
**Method** ITMS; CID      **Genenames** KCTD12

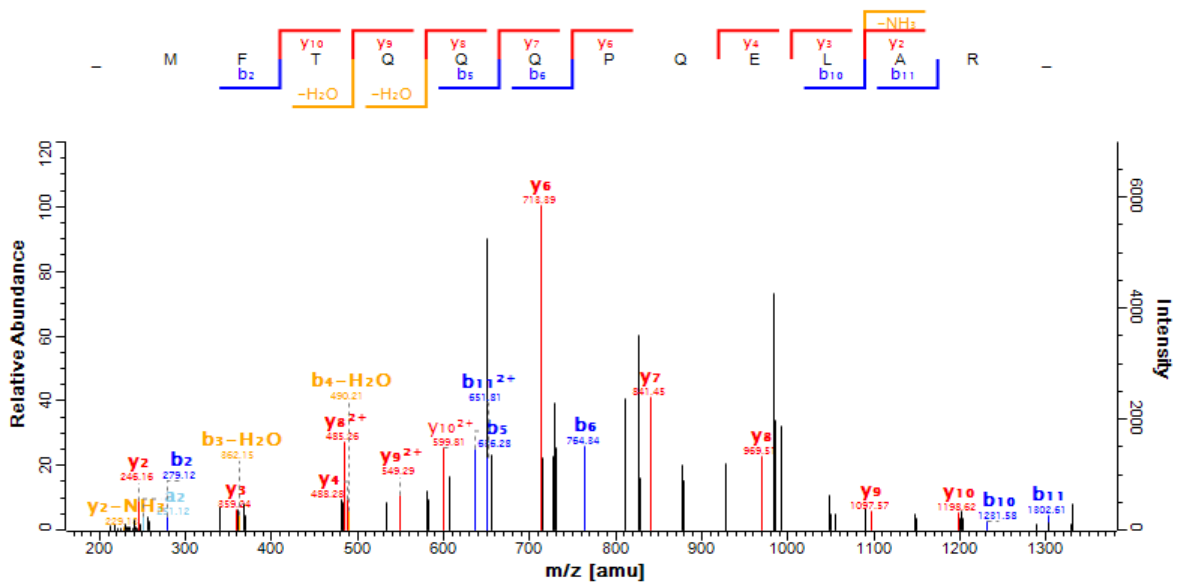

**Protein Group ID:** 4324

**Protein Accession Numbers:** Q96DX5; Q96DX5-2; Q96DX5-3

**Gene Names:** ASB9

**Peptide Sequence:** RPVELVPPESPLAQLFLER

**Total Number of Spectra:** 8

**Number of Replicates (out of 8):** 8

**Best Match Score:** 167.28

**Best Match Posterior Error Probability:** 1.85E-11

**Best Match Spectrum:**

**Scan number** 84417      **Raw file** A549-US-Mock-top20CID-Elite-2ug-B14  
**Method** ITMS; CID      **Genenames** ASB9

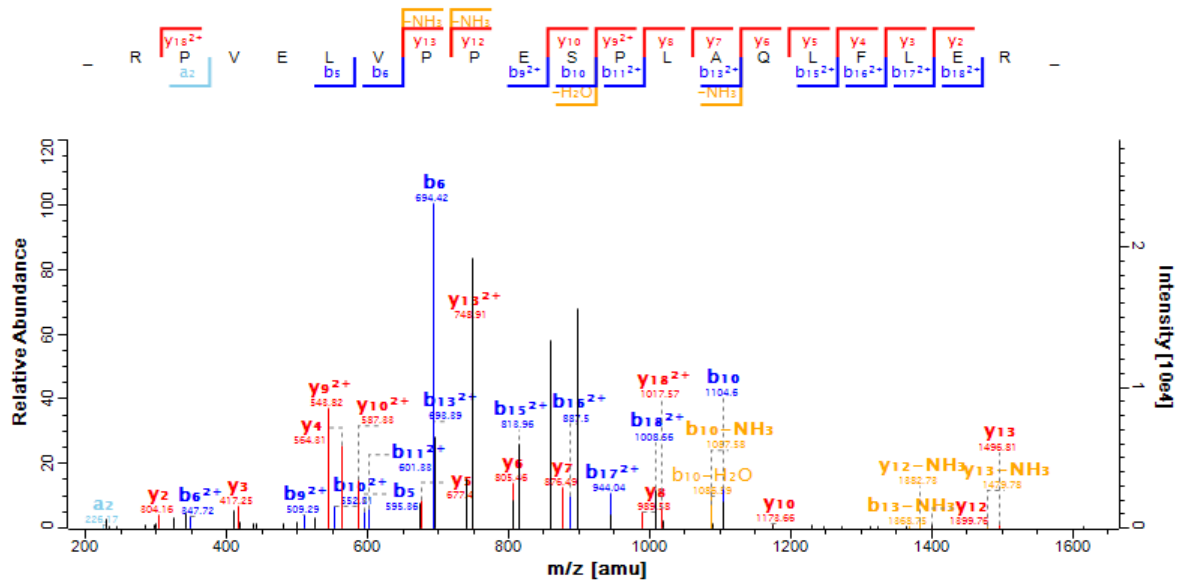

**Protein Group ID:** 4325  
**Protein Accession Numbers:** Q96DX7  
**Gene Names:** TRIM44  
**Peptide Sequence:** EQLDTSNESAEPK  
**Total Number of Spectra:** 1  
**Number of Replicates (out of 8):** 1  
**Best Match Score:** 160.48  
**Best Match Posterior Error Probability:** 2.33E-09  
**Best Match Spectrum:**

**Scan number** 8419      **Raw file** A549-US-WT-top20CID-Elite-2ug-B13  
**Method** ITMS; CID      **Genenames** TRIM44

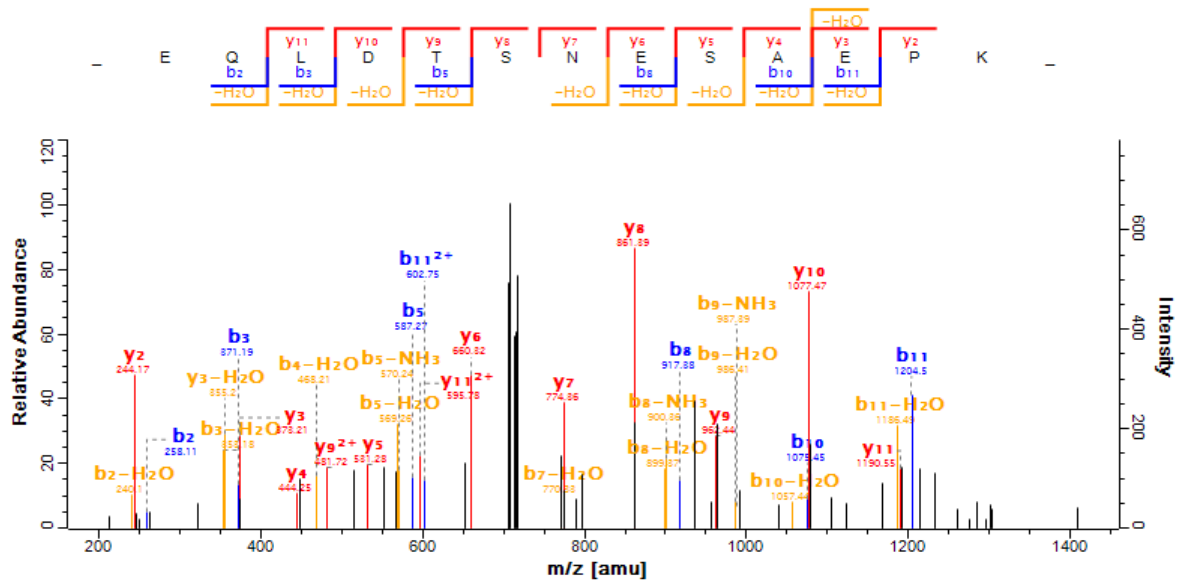

**Protein Group ID:** 4326  
**Protein Accession Numbers:** Q96DY2; Q96DY2-2  
**Gene Names:** IQCD  
**Peptide Sequence:** MEAEQEMVRMVR  
**Total Number of Spectra:** 1  
**Number of Replicates (out of 8):** 1  
**Best Match Score:** 86.911  
**Best Match Posterior Error Probability:** 0.0095023  
**Best Match Spectrum:**

**Scan number** 37589      **Raw file** A549-US-Mock-top20CID-Elite-2ug-B14  
**Method** ITMS; CID      **Genenames** IQCD

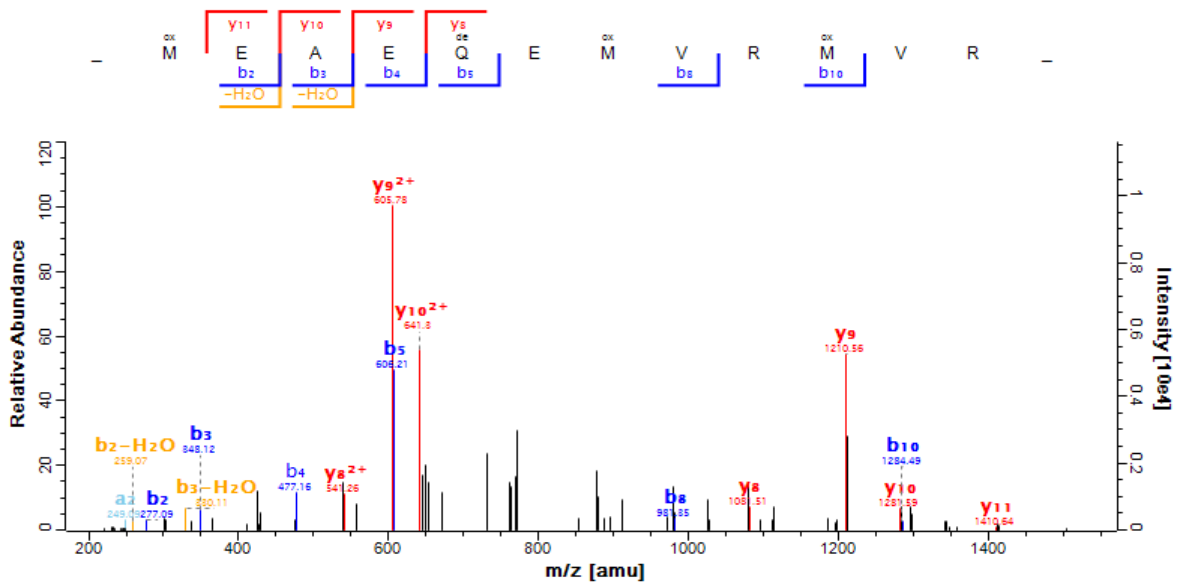

**Protein Group ID:** 4342  
**Protein Accession Numbers:** Q96EU7  
**Gene Names:** CIGALT1C1  
**Peptide Sequence:** MHHHEHHHLQAPNK  
**Total Number of Spectra:** 1  
**Number of Replicates (out of 8):** 1  
**Best Match Score:** 118.9  
**Best Match Posterior Error Probability:** 6.83E-05  
**Best Match Spectrum:**

**Scan number** 1679      **Raw file** A549-US-WT-top20CID-Elite-2ug-B11  
**Method** ITMS; CID      **Genenames** CIGALT1C1

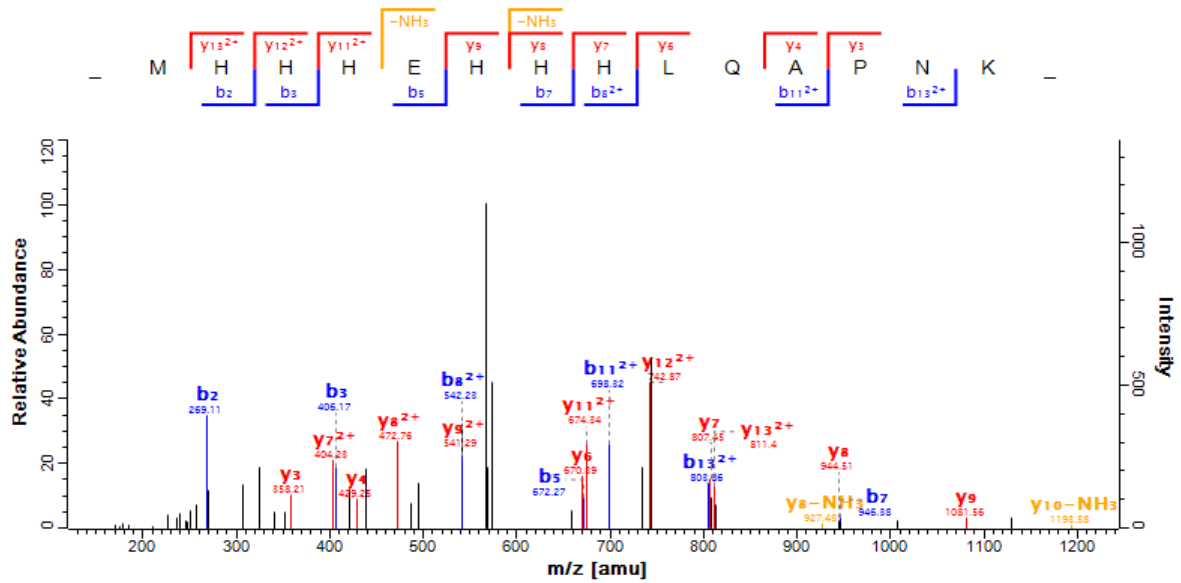

**Protein Group ID:** 4344  
**Protein Accession Numbers:** Q96EX3  
**Gene Names:** WDR34  
**Peptide Sequence:** LFILGTEGGFPLK  
**Total Number of Spectra:** 1  
**Number of Replicates (out of 8):** 1  
**Best Match Score:** 115.33  
**Best Match Posterior Error Probability:** 0.0002269  
**Best Match Spectrum:**

**Scan number** 73118      **Raw file** A549-US-Mock-top20CID-Elite-2ug-B13  
**Method** ITMS; CID      **Genenames** WDR34

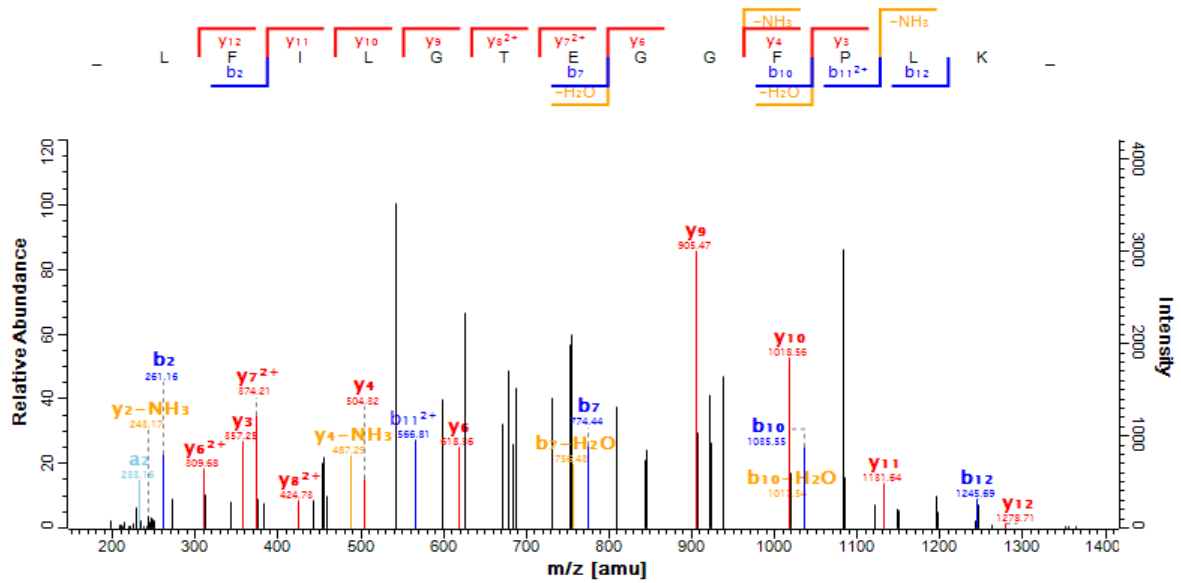





**Protein Group ID:** 4361  
**Protein Accession Numbers:** Q96GE9; Q96GE9-2  
**Gene Names:** C9orf123  
**Peptide Sequence:** LSQPFESYITAPPGTAAAPAK  
**Total Number of Spectra:** 7  
**Number of Replicates (out of 8):** 4  
**Best Match Score:** 133.21  
**Best Match Posterior Error Probability:** 2.85E-08  
**Best Match Spectrum:**

**Scan number** 53273      **Raw file** A549-US-Mock-top20CID-Elite-2ug-B13  
**Method** ITMS; CID      **Genenames** C9orf123

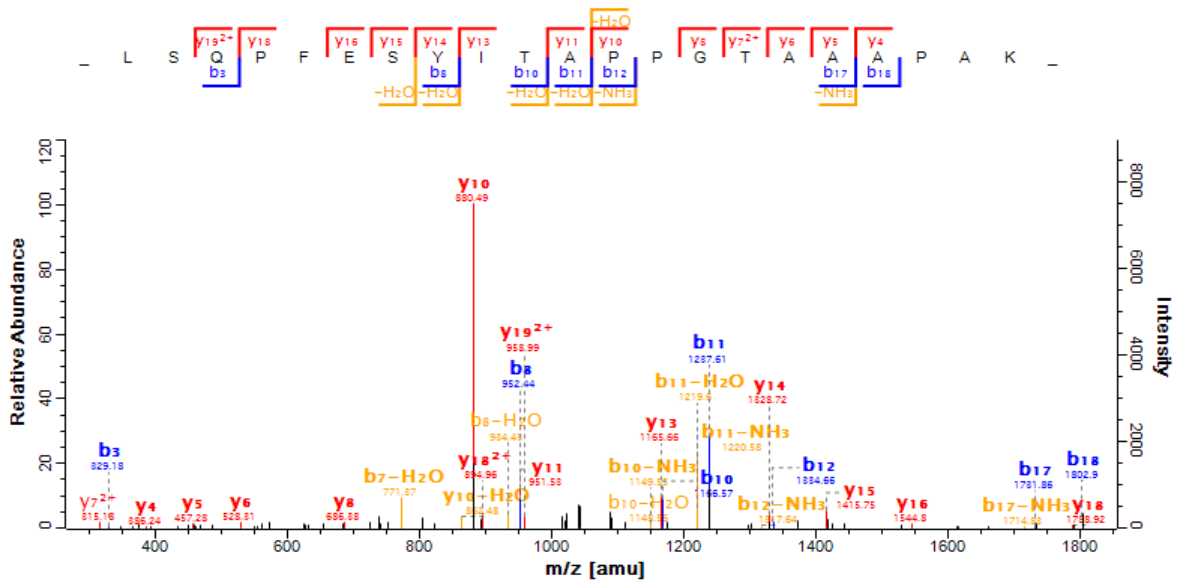

**Protein Group ID:** 4365  
**Protein Accession Numbers:** Q96GW9  
**Gene Names:** MARS2  
**Peptide Sequence:** LLNSELADALGGLNR  
**Total Number of Spectra:** 4  
**Number of Replicates (out of 8):** 4  
**Best Match Score:** 192.39  
**Best Match Posterior Error Probability:** 2.16E-28  
**Best Match Spectrum:**

**Scan number** 85086      **Raw file** A549-US-Mock-top20CID-Elite-2ug-B13  
**Method** ITMS; CID      **Genenames** MARS2

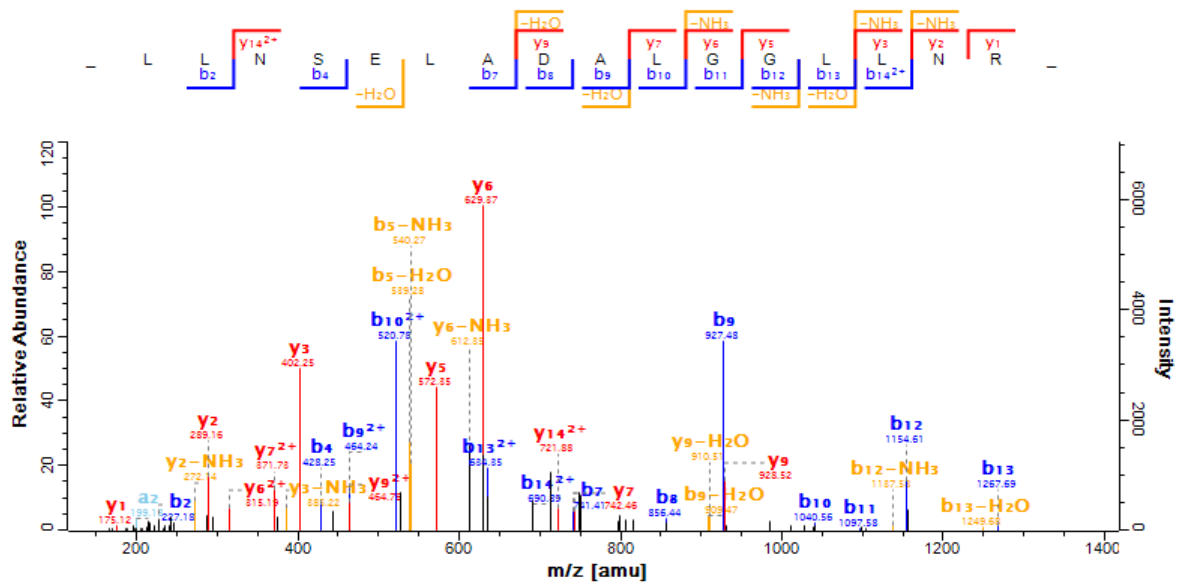

**Protein Group ID:** 4368

**Protein Accession Numbers:** Q96H55; Q96H55-4; Q96H55-3

**Gene Names:** MYO19

**Peptide Sequence:** TAASLLGLPEDVLLLEMVQIR

**Total Number of Spectra:** 8

**Number of Replicates (out of 8):** 8

**Best Match Score:** 170.91

**Best Match Posterior Error Probability:** 6.96E-17

**Best Match Spectrum:**

**Scan number** 96377      **Raw file** A549-US-WT-top20CID-Elite-2ug-B13  
**Method** ITMS; CID      **Genenames** MYO19

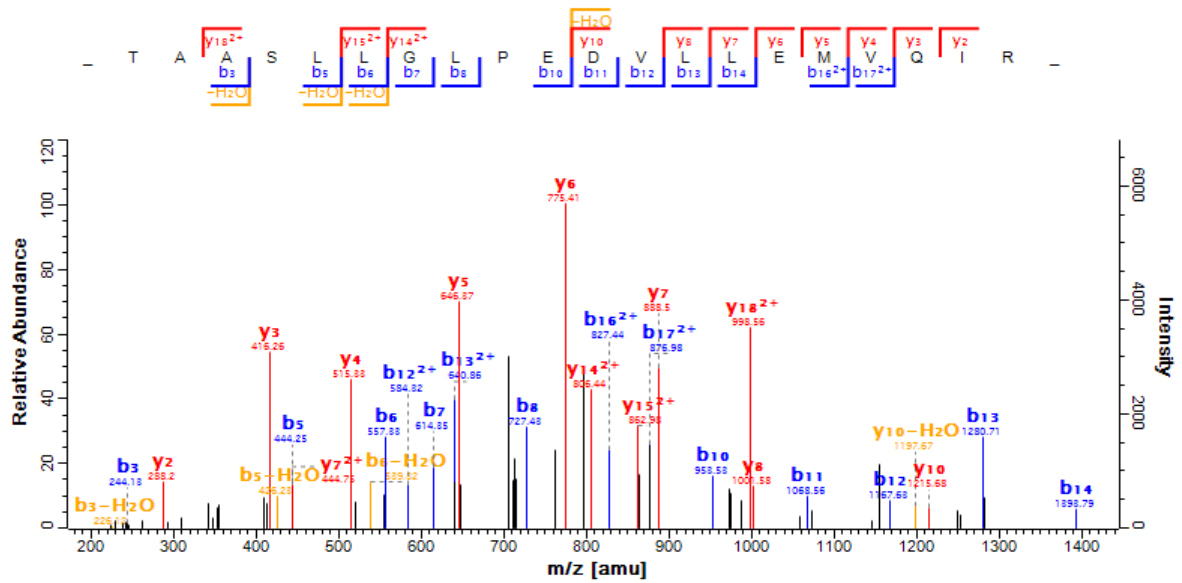

**Protein Group ID:** 4373  
**Protein Accession Numbers:** Q96HJ9  
**Gene Names:** C7orf55  
**Peptide Sequence:** SVEESAGLVGLK  
**Total Number of Spectra:** 5  
**Number of Replicates (out of 8):** 4  
**Best Match Score:** 89.805  
**Best Match Posterior Error Probability:** 0.0014516  
**Best Match Spectrum:**

**Scan number** 33644      **Raw file** A549-US-Mock-top20CID-Elite-2ug-B11  
**Method** ITMS; CID      **Genenames** C7orf55

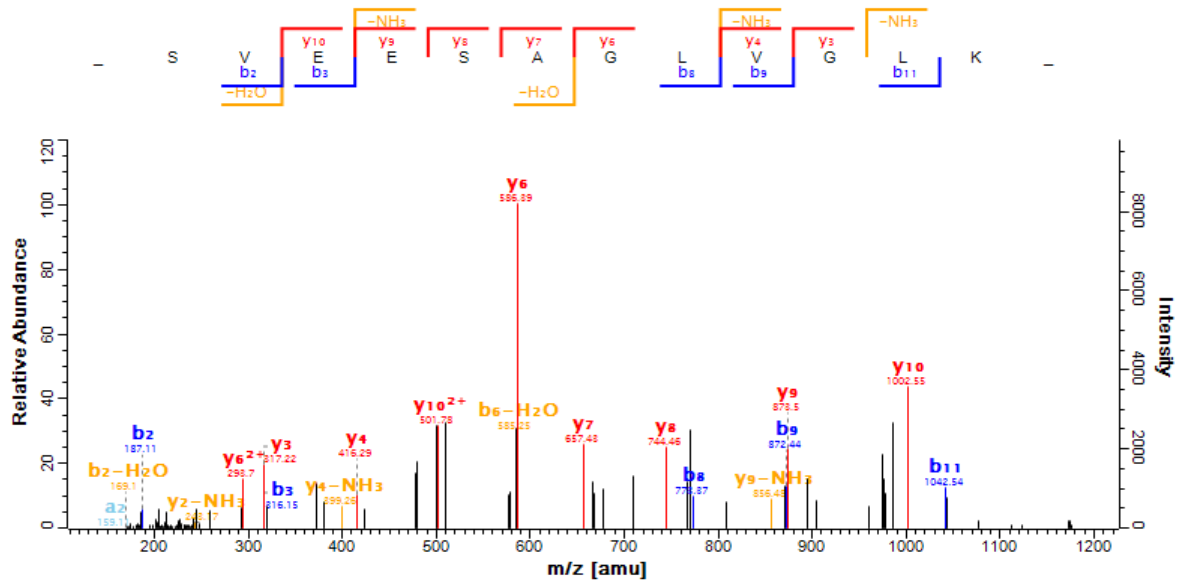

**Protein Group ID:** 4376  
**Protein Accession Numbers:** Q96HV5  
**Gene Names:** TMEM41A  
**Peptide Sequence:** HLQLNETSTANHHISR  
**Total Number of Spectra:** 3  
**Number of Replicates (out of 8):** 2  
**Best Match Score:** 104.21  
**Best Match Posterior Error Probability:** 0.00014174  
**Best Match Spectrum:**

**Scan number** 13462      **Raw file** A549-US-WT-top20CID-Elite-2ug-B12  
**Method** ITMS; CID      **Genenames** TMEM41A

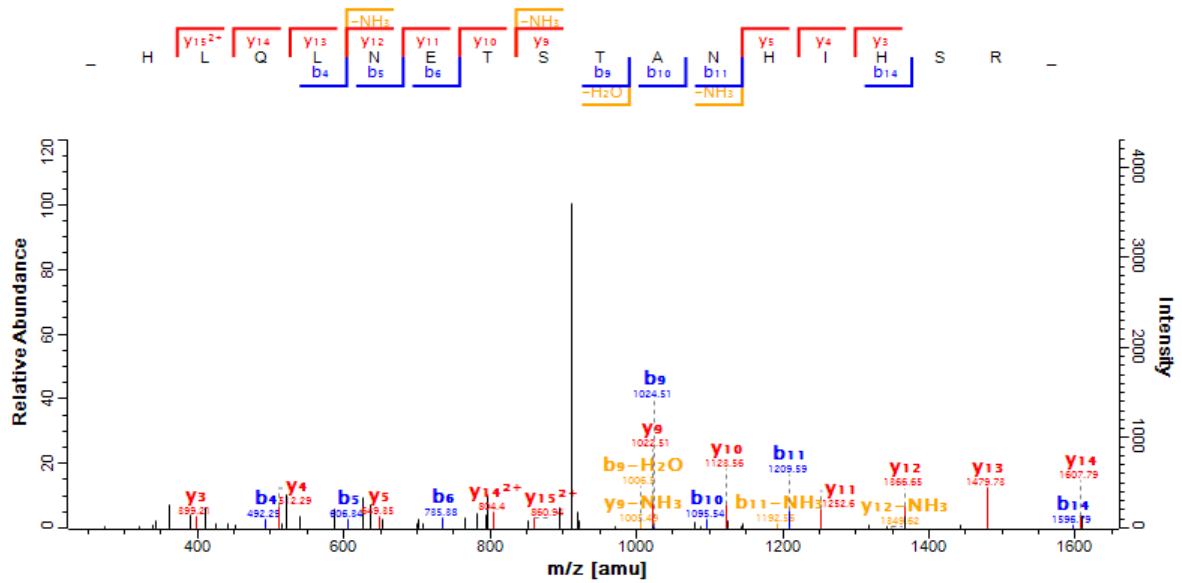

**Protein Group ID:** 4385  
**Protein Accession Numbers:** Q96IK1; Q96IK1-2  
**Gene Names:** BOD1  
**Peptide Sequence:** VDNFVSTHLDK  
**Total Number of Spectra:** 6  
**Number of Replicates (out of 8):** 5  
**Best Match Score:** 124.12  
**Best Match Posterior Error Probability:** 4.39E-05  
**Best Match Spectrum:**

**Scan number** 25286      **Raw file** A549-US-Mock-top20CID-Elite-2ug-B11  
**Method** ITMS; CID      **Genenames** BOD1

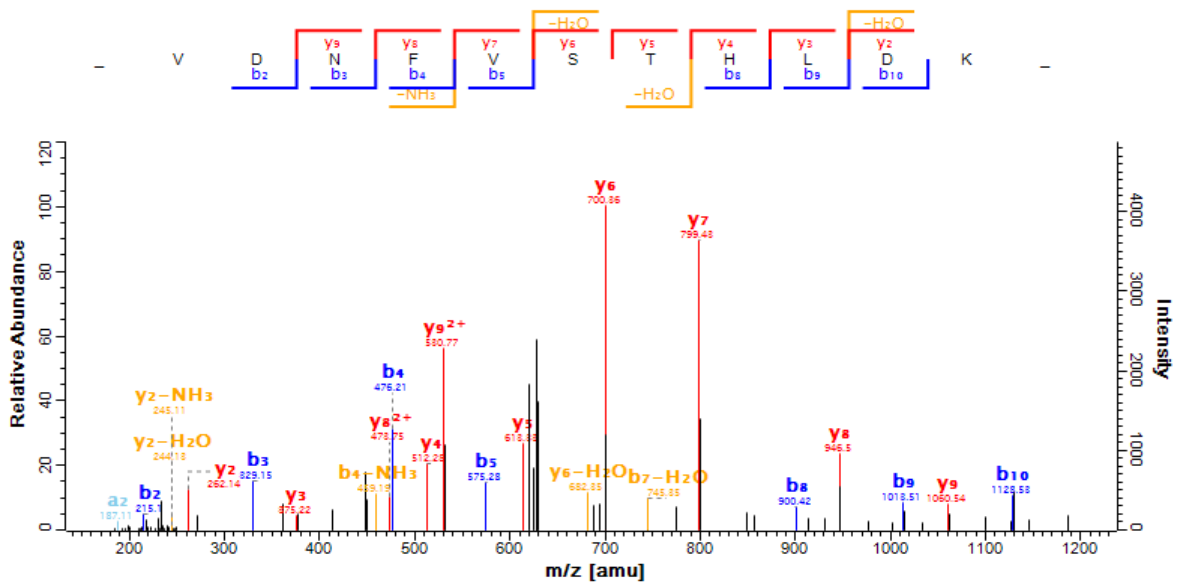

**Protein Group ID:** 4386  
**Protein Accession Numbers:** Q96IX5  
**Gene Names:** USMG5  
**Peptide Sequence:** AGPESDAQYQFTGIK  
**Total Number of Spectra:** 10  
**Number of Replicates (out of 8):** 7  
**Best Match Score:** 288.45  
**Best Match Posterior Error Probability:** 3.27E-144  
**Best Match Spectrum:**

**Scan number** 36773      **Raw file** A549-US-WT-top20CID-Elite-2ug-B14  
**Method** ITMS; CID      **Genenames** USMG5

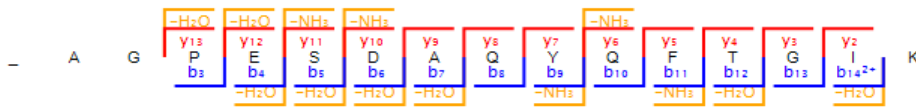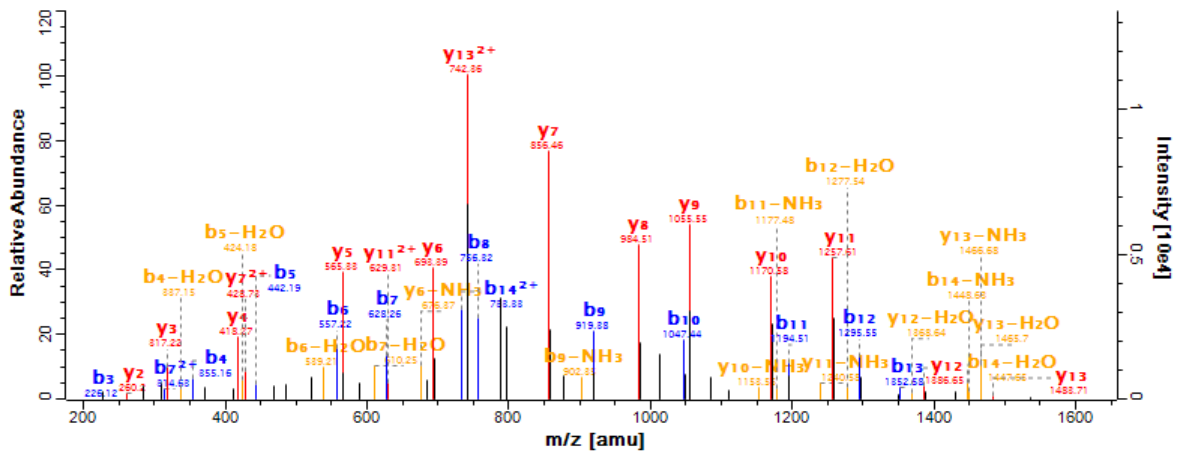



**Protein Group ID:** 4399  
**Protein Accession Numbers:** Q96K37  
**Gene Names:** SLC35E1  
**Peptide Sequence:** AAAAVGAGHGAGGPGAASSSGGAR  
**Total Number of Spectra:** 13  
**Number of Replicates (out of 8):** 7  
**Best Match Score:** 228.85  
**Best Match Posterior Error Probability:** 1.24E-81  
**Best Match Spectrum:**

**Scan number** 15639      **Raw file** A549-US-Mock-top20CID-Elite-2ug-B12  
**Method** ITMS; CID      **Genenames** SLC35E1

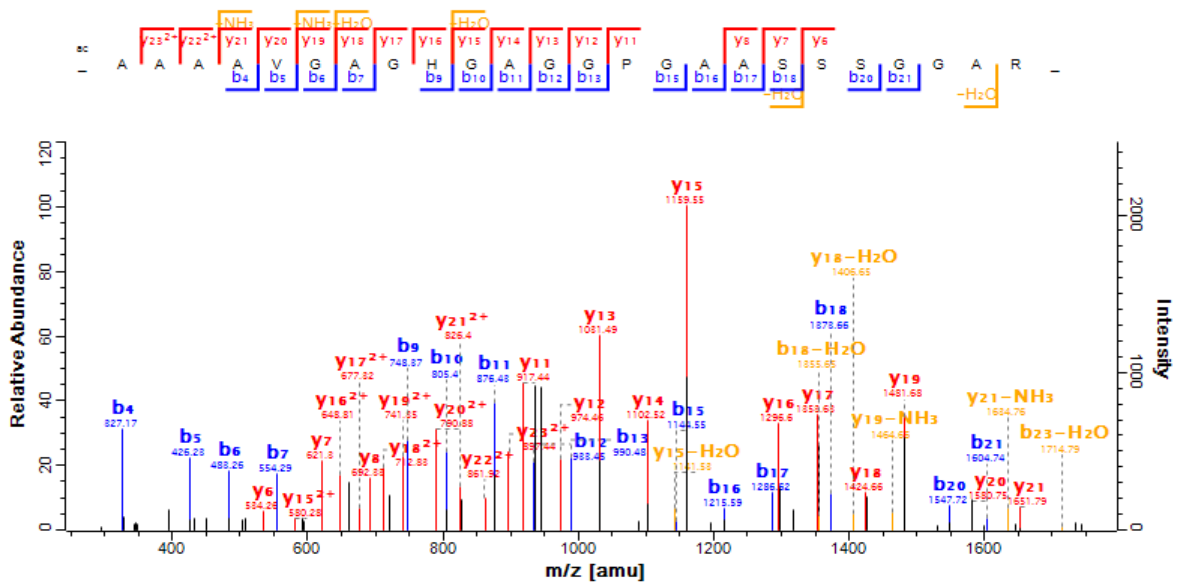

**Protein Group ID:** 4402  
**Protein Accession Numbers:** Q96KC8  
**Gene Names:** DNAJC1  
**Peptide Sequence:** LEATAKPEPEEK  
**Total Number of Spectra:** 6  
**Number of Replicates (out of 8):** 6  
**Best Match Score:** 219.43  
**Best Match Posterior Error Probability:** 1.06E-39  
**Best Match Spectrum:**

**Scan number** 13475      **Raw file** A549-US-Mock-top20CID-Elite-2ug-B11  
**Method** ITMS; CID      **Genenames** DNAJC1

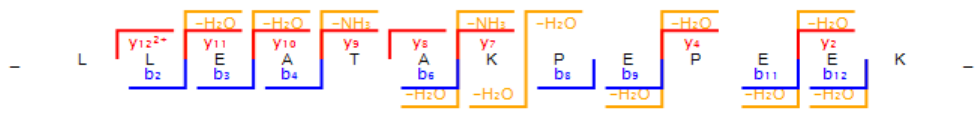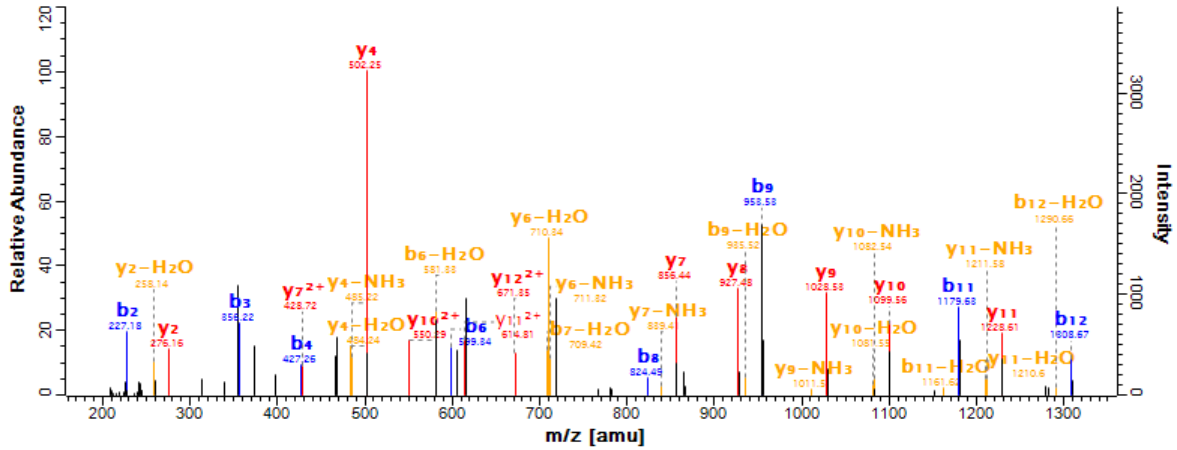

**Protein Group ID:** 4410  
**Protein Accession Numbers:** Q96LJ7  
**Gene Names:** DHRS1  
**Peptide Sequence:** LAADCAHELK  
**Total Number of Spectra:** 3  
**Number of Replicates (out of 8):** 3  
**Best Match Score:** 138.22  
**Best Match Posterior Error Probability:** 1.09E-05  
**Best Match Spectrum:**

**Scan number** 10145      **Raw file** A549-US-WT-top20CID-Elite-2ug-813  
**Method** ITMS; CID      **Genenames** DHRS1

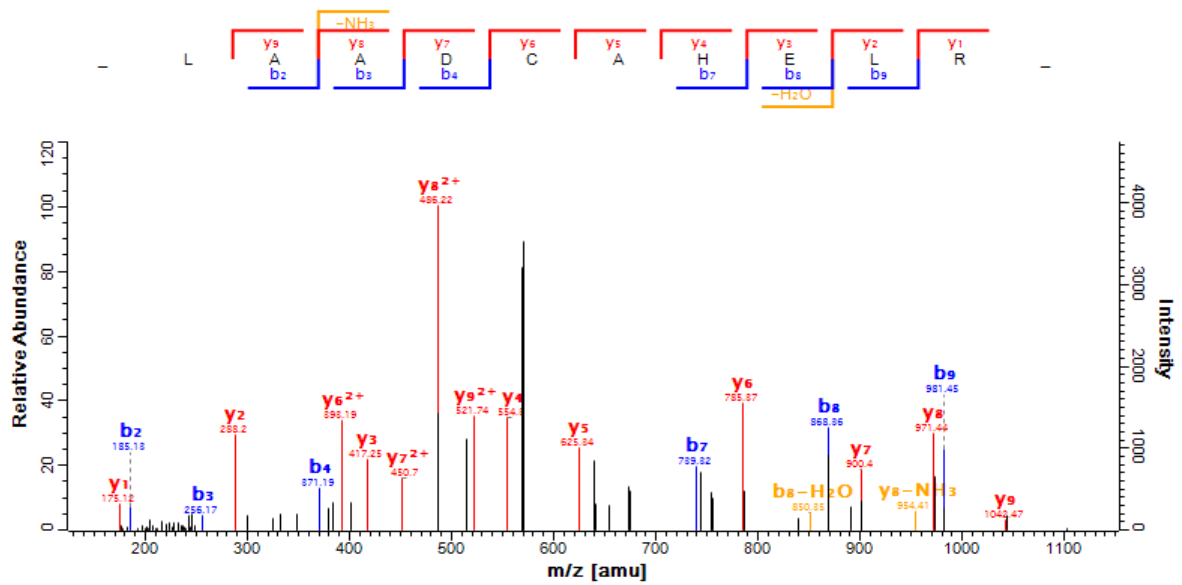

**Protein Group ID:** 4414  
**Protein Accession Numbers:** Q96MW5  
**Gene Names:** COG8  
**Peptide Sequence:** RETLFTLDDQALGPLTAPPEPPAEEPR  
**Total Number of Spectra:** 1  
**Number of Replicates (out of 8):** 1  
**Best Match Score:** 60.382  
**Best Match Posterior Error Probability:** 0.0010003  
**Best Match Spectrum:**

**Scan number** 67403      **Raw file** A549-US-WT-top20CID-Elite-2ug-B13  
**Method** ITMS; CID      **Genenames** COG8

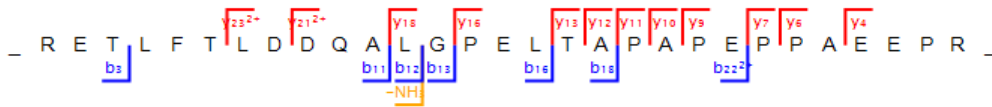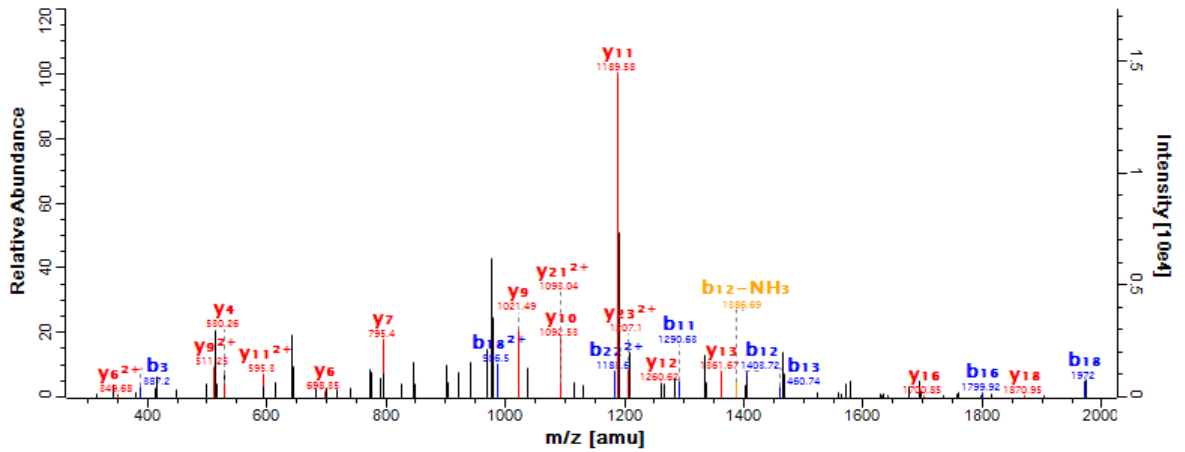

**Protein Group ID:** 4429  
**Protein Accession Numbers:** Q96PX9  
**Gene Names:** PLEKHG4B  
**Peptide Sequence:** PQSDALLSSHGNAFFK  
**Total Number of Spectra:** 1  
**Number of Replicates (out of 8):** 1  
**Best Match Score:** 90.444  
**Best Match Posterior Error Probability:** 0.00055388  
**Best Match Spectrum:**

**Scan number** 42956      **Raw file** A549-US-WT-top20CID-Elite-2ug-B14  
**Method** ITMS; CID      **Genenames** PLEKHG4B

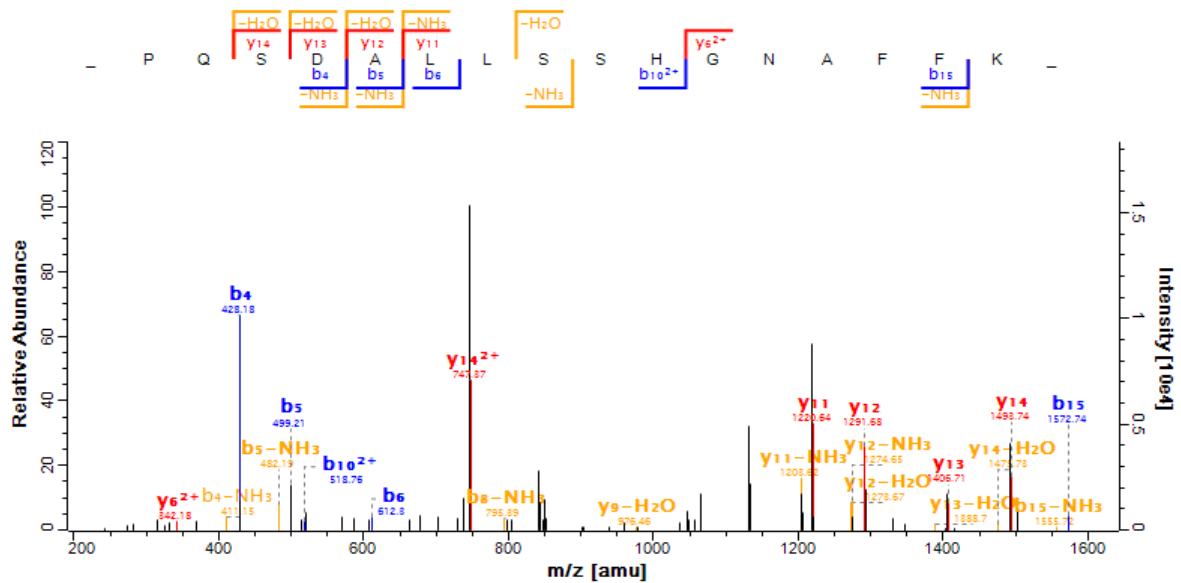



**Protein Group ID:** 4439  
**Protein Accession Numbers:** Q96RD7; Q96RD7-2  
**Gene Names:** PANX1  
**Peptide Sequence:** VYEILPFDVLHFYK  
**Total Number of Spectra:** 1  
**Number of Replicates (out of 8):** 1  
**Best Match Score:** 78.903  
**Best Match Posterior Error Probability:** 0.003518  
**Best Match Spectrum:**

**Scan number** 80186      **Raw file** A549-US-WT-top20CID-Elite-2ug-B13  
**Method** ITMS; CID      **Genenames** PANX1

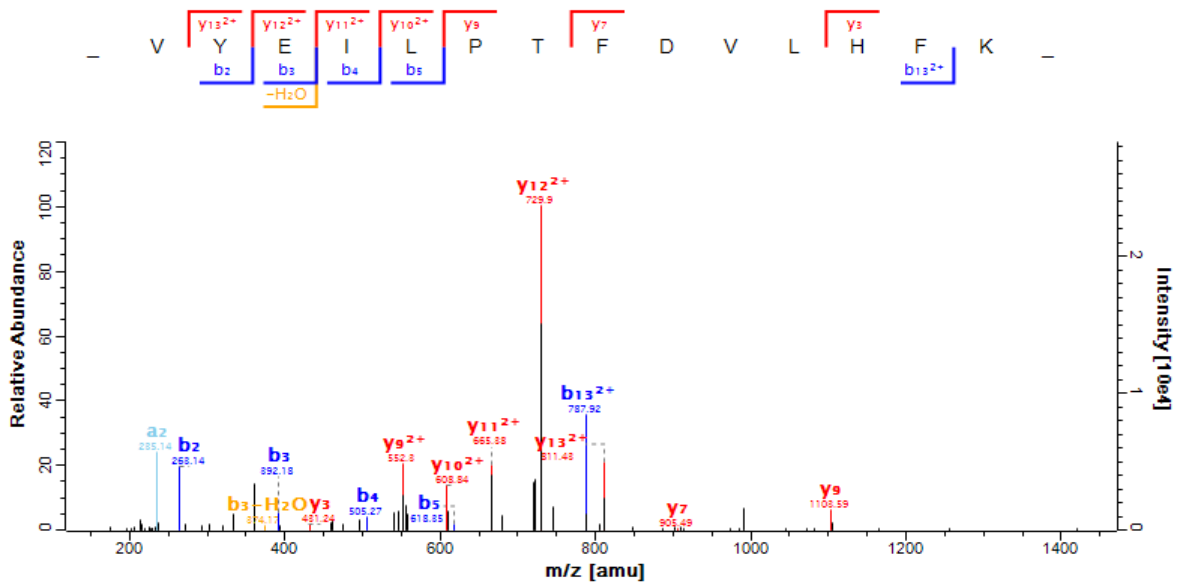

**Protein Group ID:** 4444  
**Protein Accession Numbers:** Q96RT6  
**Gene Names:** CTAGE1  
**Peptide Sequence:** HSEQNELMADISK  
**Total Number of Spectra:** 1  
**Number of Replicates (out of 8):** 1  
**Best Match Score:** 157.23  
**Best Match Posterior Error Probability:** 1.64E-08  
**Best Match Spectrum:**

**Scan number** 34415      **Raw file** A549-US-Mock-top20CID-Elite-2ug-B14  
**Method** ITMS; CID      **Genenames** CTAGE1

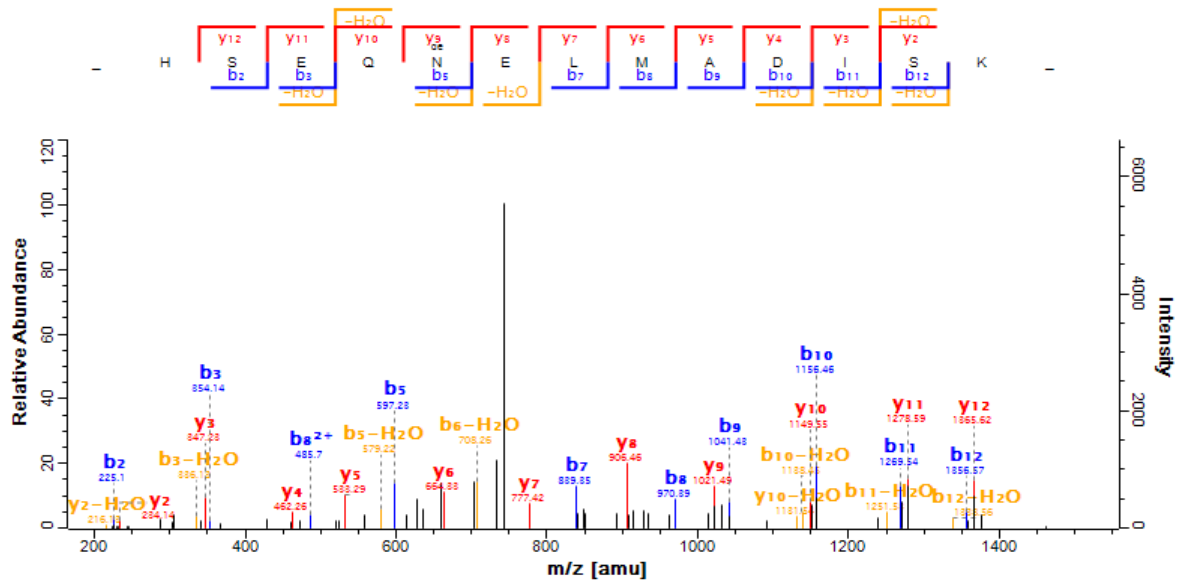



**Protein Group ID:** 4448

**Protein Accession Numbers:** Q96S55; Q96S55-2; Q96S55-3

**Gene Names:** WRNIP1

**Peptide Sequence:** TTLAHIIASNSK

**Total Number of Spectra:** 1

**Number of Replicates (out of 8):** 1

**Best Match Score:** 127.56

**Best Match Posterior Error Probability:** 0.00010135

**Best Match Spectrum:**

|                    |           |                  |                                     |
|--------------------|-----------|------------------|-------------------------------------|
| <b>Scan number</b> | 26061     | <b>Raw file</b>  | A549-US-Mock-top20CID-Elite-2ug-B13 |
| <b>Method</b>      | ITMS; CID | <b>Genenames</b> | WRNIP1                              |

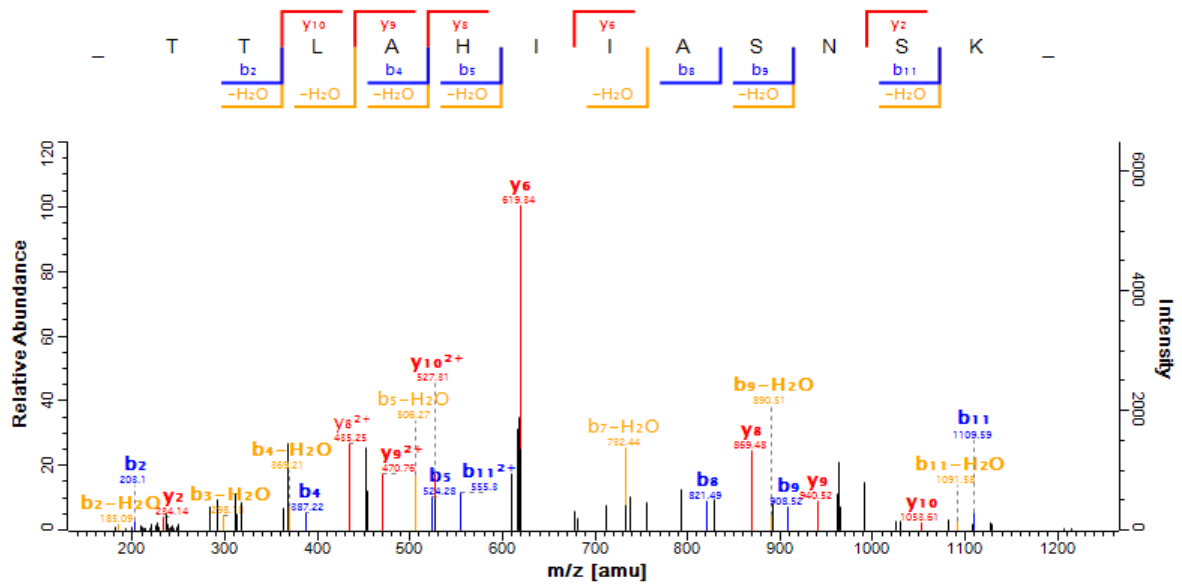

**Protein Group ID:** 4449  
**Protein Accession Numbers:** Q96S59  
**Gene Names:** RANBP9  
**Peptide Sequence:** RLYPAVDEQETPLPR  
**Total Number of Spectra:** 1  
**Number of Replicates (out of 8):** 1  
**Best Match Score:** 87.083  
**Best Match Posterior Error Probability:** 0.0024477  
**Best Match Spectrum:**

**Scan number** 37170      **Raw file** A549-US-WT-top20CID-Elite-2ug-811  
**Method** ITMS; CID      **Genenames** RANBP9

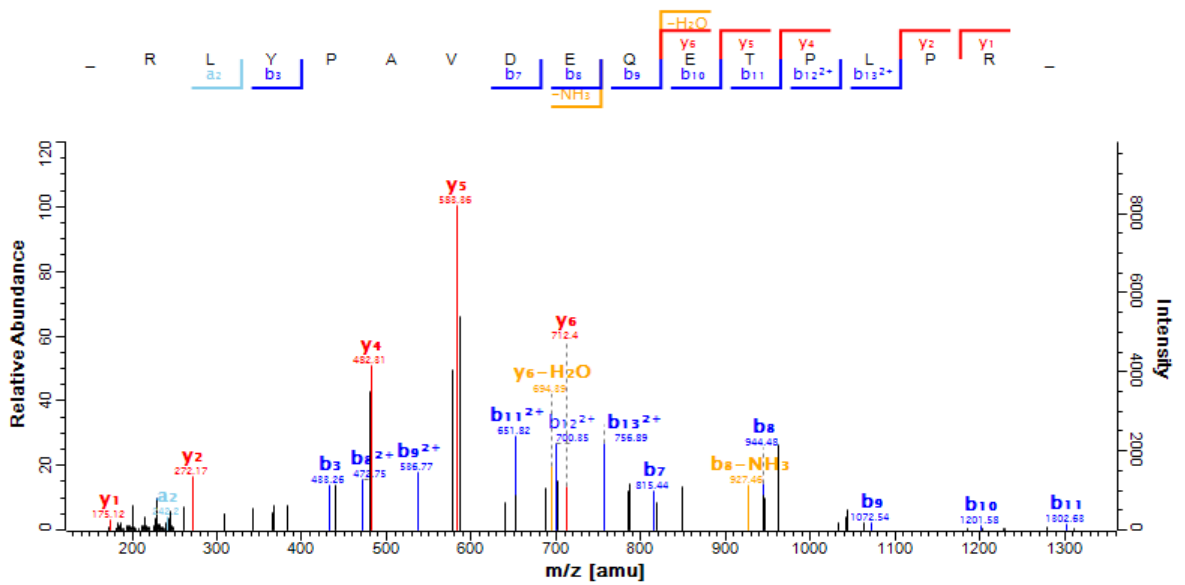

**Protein Group ID:** 4457  
**Protein Accession Numbers:** Q96ST8-2  
**Gene Names:**  
**Peptide Sequence:** MDLNNMNQSLTLELNTMK  
**Total Number of Spectra:** 1  
**Number of Replicates (out of 8):** 1  
**Best Match Score:** 63.827  
**Best Match Posterior Error Probability:** 0.00015283  
**Best Match Spectrum:**

**Scan number** 72292      **Raw file** A549-US-Mock-top20CID-Elite-2ug-B14  
**Method** ITMS; CID      **Pepti...** 63.83

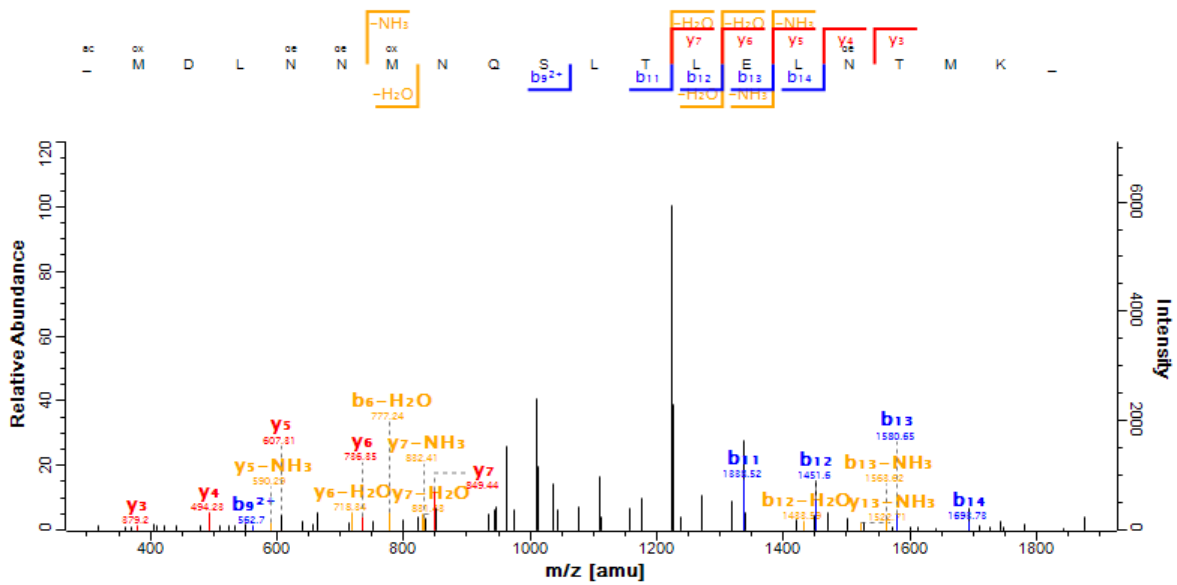

**Protein Group ID:** 4475  
**Protein Accession Numbers:** Q99496  
**Gene Names:** RNF2  
**Peptide Sequence:** HNNQQALSHSIEEGLK  
**Total Number of Spectra:** 5  
**Number of Replicates (out of 8):** 5  
**Best Match Score:** 138.55  
**Best Match Posterior Error Probability:** 2.96E-05  
**Best Match Spectrum:**

**Scan number** 24540      **Raw file** A549-US-Mock-top20CID-Elite-2ug-B13  
**Method** ITMS; CID      **Genenames** RNF2

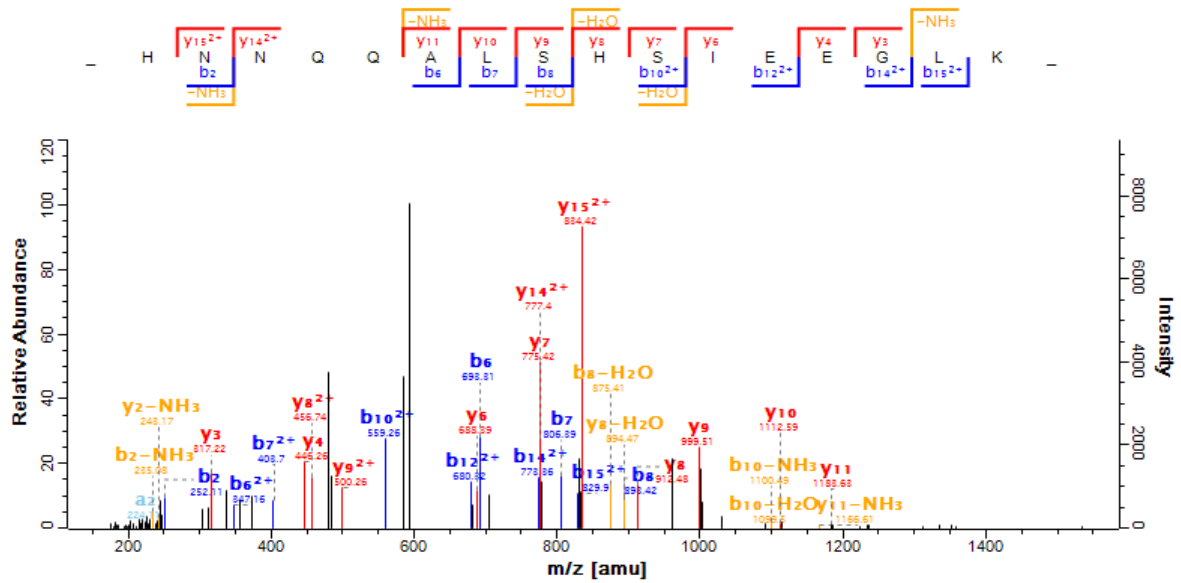

**Protein Group ID:** 4497  
**Protein Accession Numbers:** Q99797  
**Gene Names:** MIPEP  
**Peptide Sequence:** NFTSAGDHHIIDGLHAESPDDLVR  
**Total Number of Spectra:** 8  
**Number of Replicates (out of 8):** 6  
**Best Match Score:** 99.603  
**Best Match Posterior Error Probability:** 6.18E-07  
**Best Match Spectrum:**

**Scan number** 60109      **Raw file** A549-US-Mock-top20CID-Elite-2ug-B14  
**Method** ITMS; CID      **Genenames** MIPEP

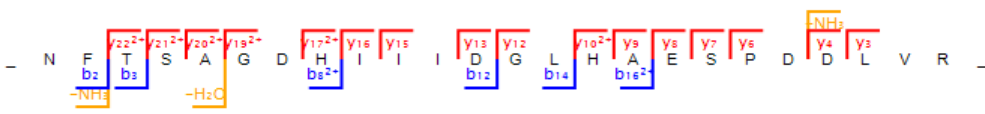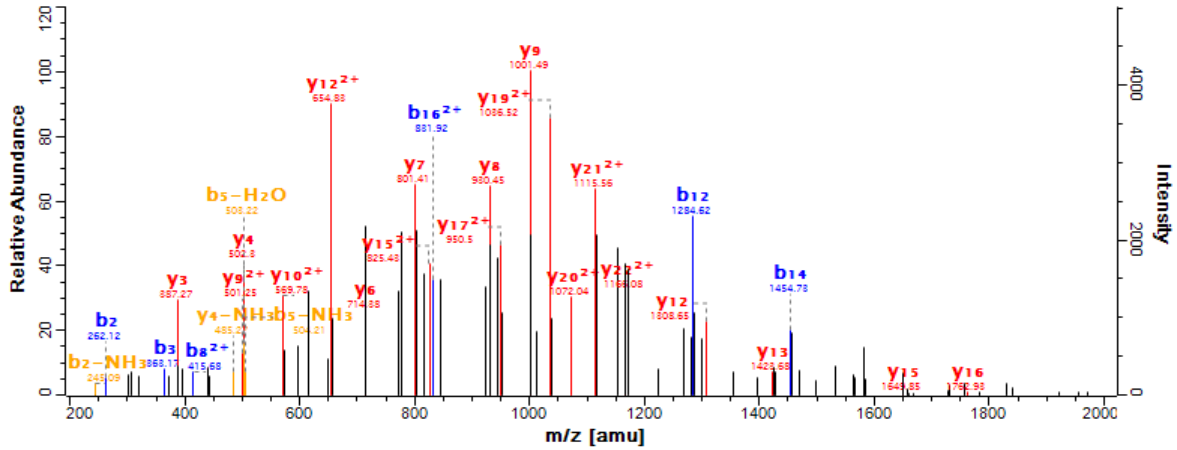

**Protein Group ID:** 4501

**Protein Accession Numbers:** Q99871-2; Q99871; Q99871-3

**Gene Names:** HAUS7

**Peptide Sequence:** QLHFMDQLLDTIR

**Total Number of Spectra:** 3

**Number of Replicates (out of 8):** 3

**Best Match Score:** 100.04

**Best Match Posterior Error Probability:** 0.00050986

**Best Match Spectrum:**

**Scan number** 74135      **Raw file** A549-US-Mock-top20CID-Elite-2ug-B12  
**Method** ITMS; CID      **Genenames** HAUS7

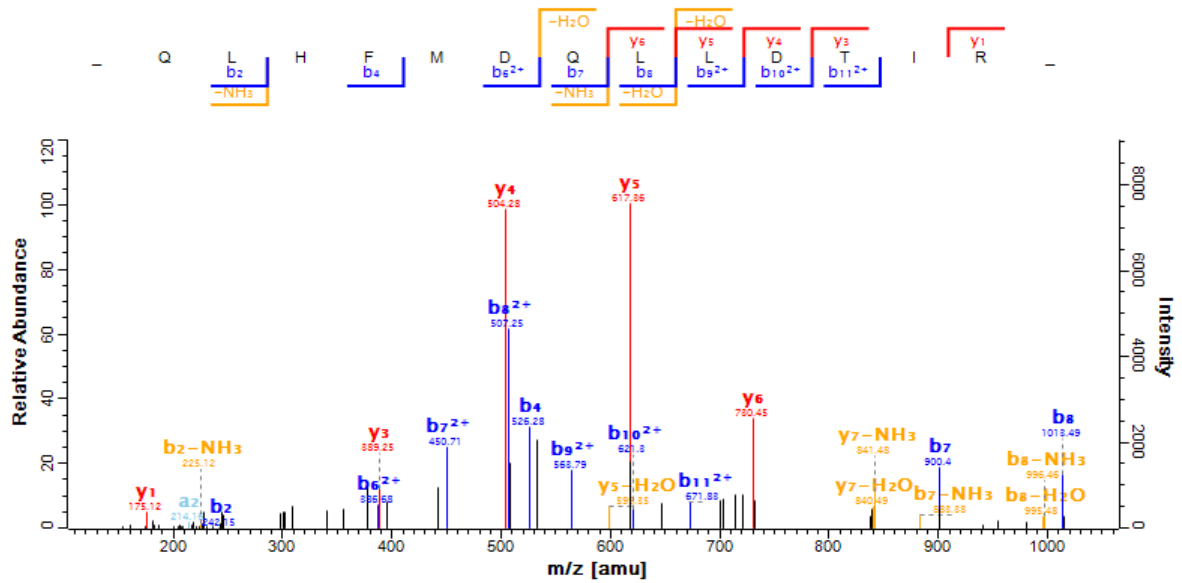

**Protein Group ID:** 4516  
**Protein Accession Numbers:** Q9BQC6  
**Gene Names:** MRP63  
**Peptide Sequence:** FIADQLDHLNVTK  
**Total Number of Spectra:** 5  
**Number of Replicates (out of 8):** 4  
**Best Match Score:** 176.87  
**Best Match Posterior Error Probability:** 5.35E-14  
**Best Match Spectrum:**

**Scan number** 46220      **Raw file** A549-US-WT-top20CID-Elite-2ug-B13  
**Method** ITMS; CID      **Genenames** MRP63

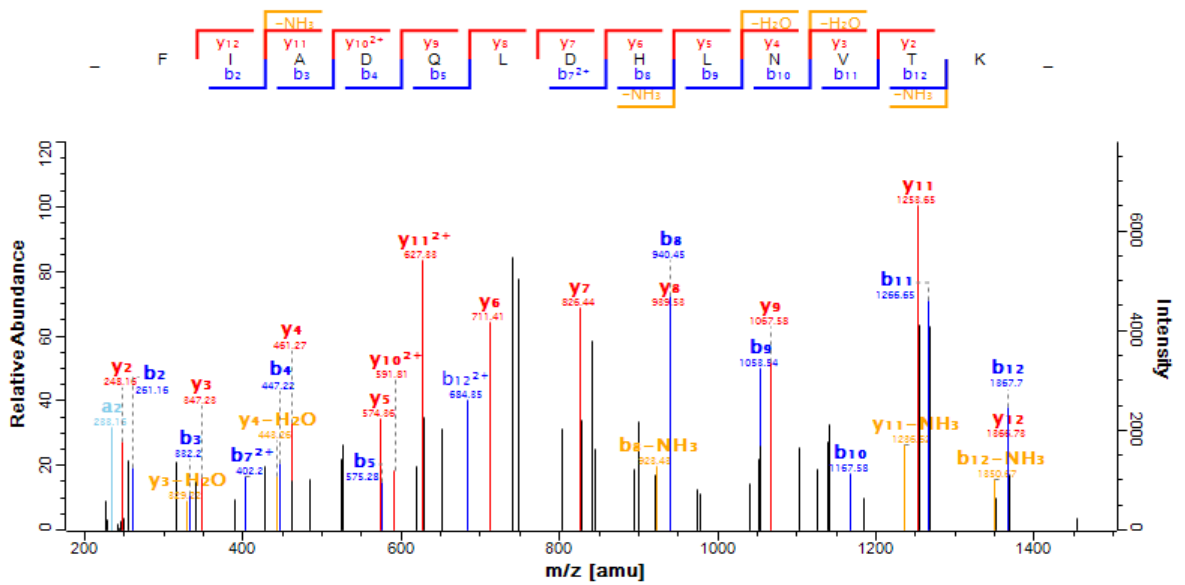

**Protein Group ID:** 4517  
**Protein Accession Numbers:** Q9BQD3  
**Gene Names:** KXD1  
**Peptide Sequence:** TNEMLLNFNNLSSAR  
**Total Number of Spectra:** 1  
**Number of Replicates (out of 8):** 1  
**Best Match Score:** 103.04  
**Best Match Posterior Error Probability:** 0.00018141  
**Best Match Spectrum:**

**Scan number** 59435      **Raw file** A549-US-Mock-top20CID-Elite-2ug-B12  
**Method** ITMS; CID      **Genenames** KXD1

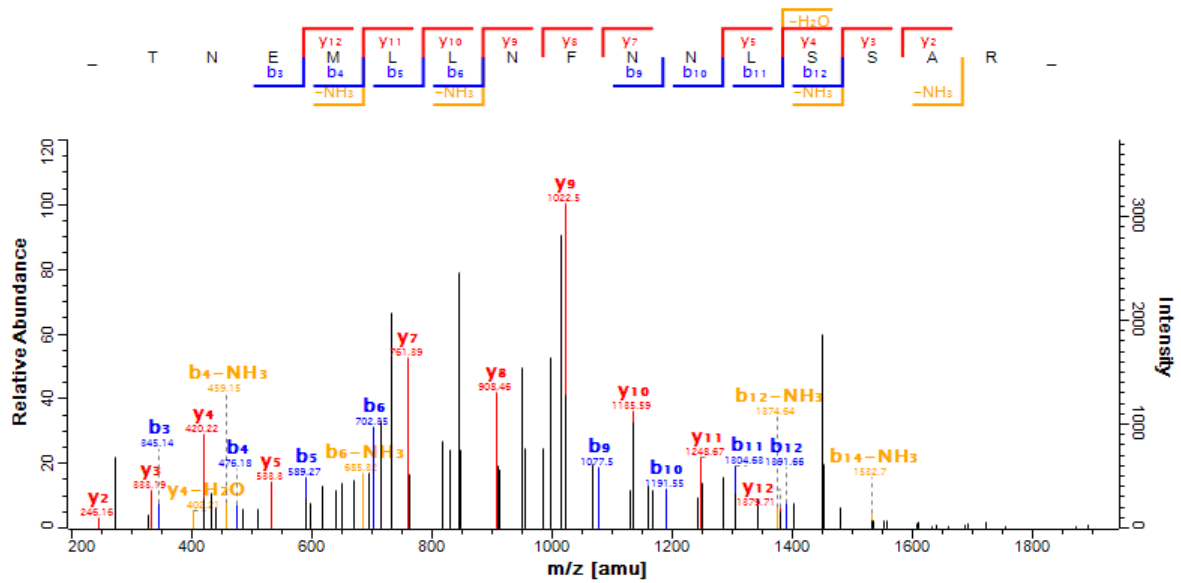



**Protein Group ID:** 4523  
**Protein Accession Numbers:** Q9BR61  
**Gene Names:** ACBD6  
**Peptide Sequence:** ALGDSSPSQAMQEYIAVVK  
**Total Number of Spectra:** 4  
**Number of Replicates (out of 8):** 3  
**Best Match Score:** 135.08  
**Best Match Posterior Error Probability:** 8.10E-06  
**Best Match Spectrum:**

**Scan number** 63201      **Raw file** A549-US-Mock-top20CID-Elite-2ug-B14  
**Method** ITMS; CID      **Genenames** ACBD6

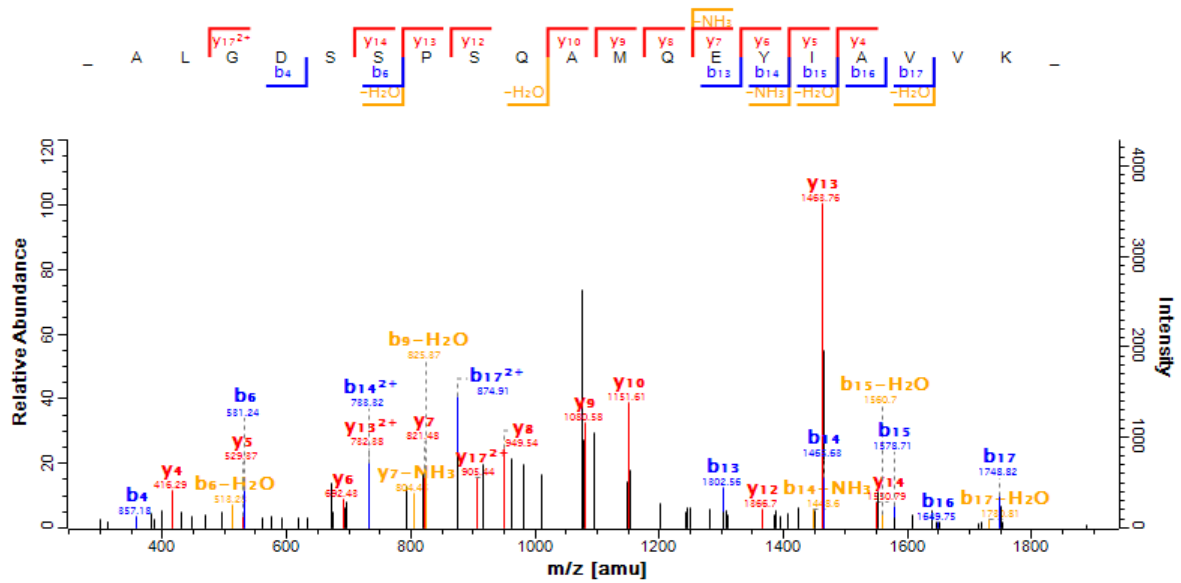

**Protein Group ID:** 4543

**Protein Accession Numbers:** Q9BSE5

**Gene Names:** AGMAT

**Peptide Sequence:** LPVQTSPEGLDAAFVIGVPLDGTGTSNRPGAR

**Total Number of Spectra:** 3

**Number of Replicates (out of 8):** 3

**Best Match Score:** 87.72

**Best Match Posterior Error Probability:** 2.05E-06

**Best Match Spectrum:**

|                    |           |                  |                                     |
|--------------------|-----------|------------------|-------------------------------------|
| <b>Scan number</b> | 66522     | <b>Raw file</b>  | A549-US-Mock-top20CID-Elite-2ug-B11 |
| <b>Method</b>      | ITMS; CID | <b>Genenames</b> | AGMAT                               |

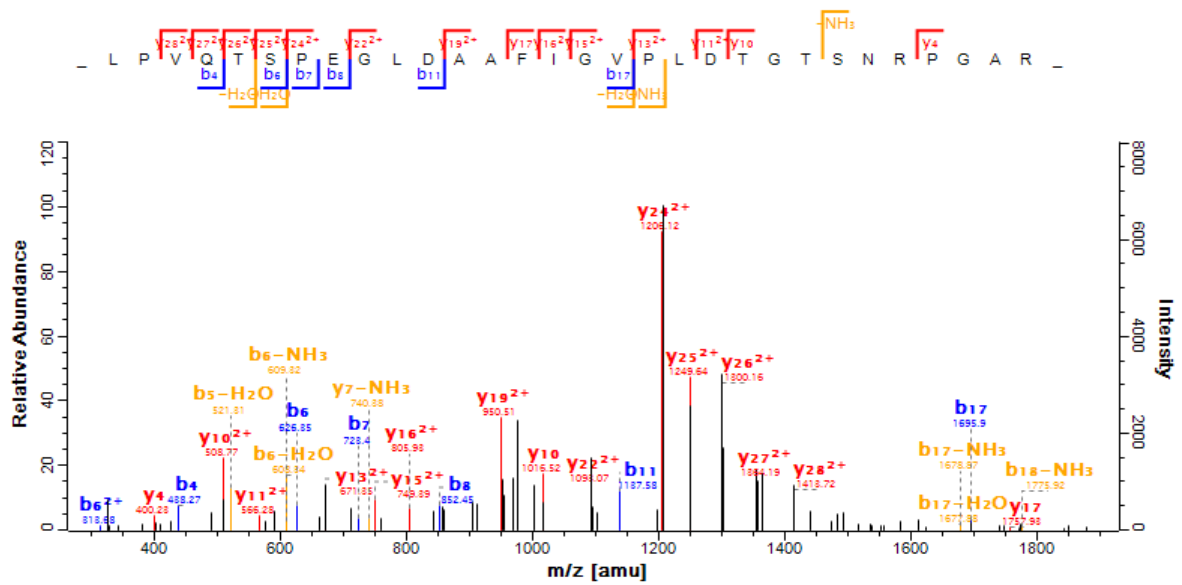

**Protein Group ID:** 4556  
**Protein Accession Numbers:** Q9BTM9-2; Q9BTM9  
**Gene Names:** URM1  
**Peptide Sequence:** VTLPGQEEPWDI R  
**Total Number of Spectra:** 3  
**Number of Replicates (out of 8):** 2  
**Best Match Score:** 95.264  
**Best Match Posterior Error Probability:** 0.00088456  
**Best Match Spectrum:**

**Scan number** 51777      **Raw file** A549-US-Mock-top20CID-Elite-2ug-B11  
**Method** ITMS; CID      **Genenames** URM1

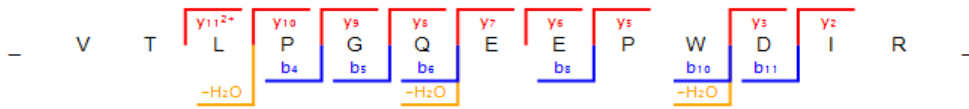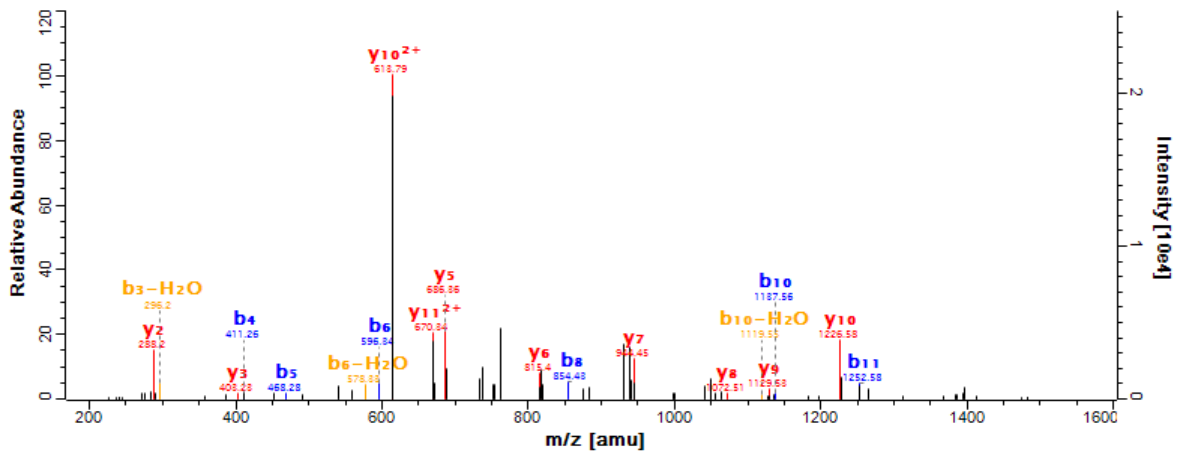

**Protein Group ID:** 4558  
**Protein Accession Numbers:** Q9BTT6  
**Gene Names:** LRRC1  
**Peptide Sequence:** LLHLPLSLTALK  
**Total Number of Spectra:** 1  
**Number of Replicates (out of 8):** 1  
**Best Match Score:** 136.96  
**Best Match Posterior Error Probability:** 7.22E-05  
**Best Match Spectrum:**

**Scan number** 68486      **Raw file** A549-US-WT-top20CID-Elite-2ug-811  
**Method** ITMS; CID      **Genenames** LRRC1

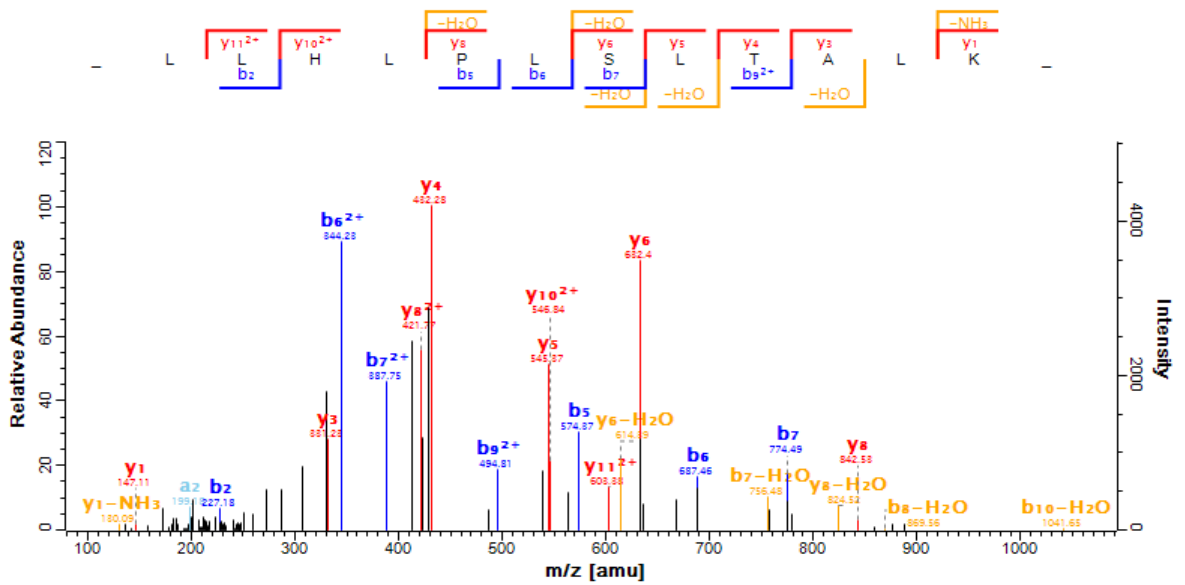

**Protein Group ID:** 4563  
**Protein Accession Numbers:** Q9BU61  
**Gene Names:** NDUFAF3  
**Peptide Sequence:** EAAQAMYIDSYNSR  
**Total Number of Spectra:** 6  
**Number of Replicates (out of 8):** 3  
**Best Match Score:** 157.35  
**Best Match Posterior Error Probability:** 2.39E-09  
**Best Match Spectrum:**

**Scan number** 31685      **Raw file** A549-US-WT-top20CID-Elite-2ug-B12  
**Method** ITMS; CID      **Genenames** NDUFAF3

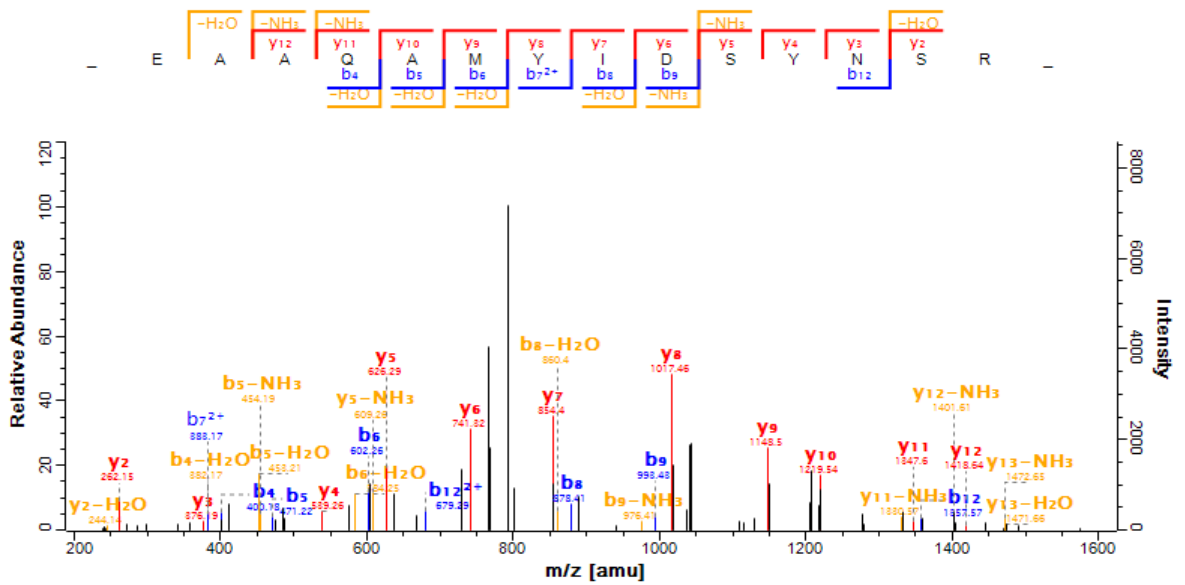

**Protein Group ID:** 4566  
**Protein Accession Numbers:** Q9BUE0  
**Gene Names:** MED18  
**Peptide Sequence:** GQQASPFVLR  
**Total Number of Spectra:** 1  
**Number of Replicates (out of 8):** 1  
**Best Match Score:** 140.07  
**Best Match Posterior Error Probability:** 1.26E-05  
**Best Match Spectrum:**

**Scan number** 32948      **Raw file** A549-US-Mock-top20CID-Elite-2ug-B11  
**Method** ITMS; CID      **Genenames** MED18

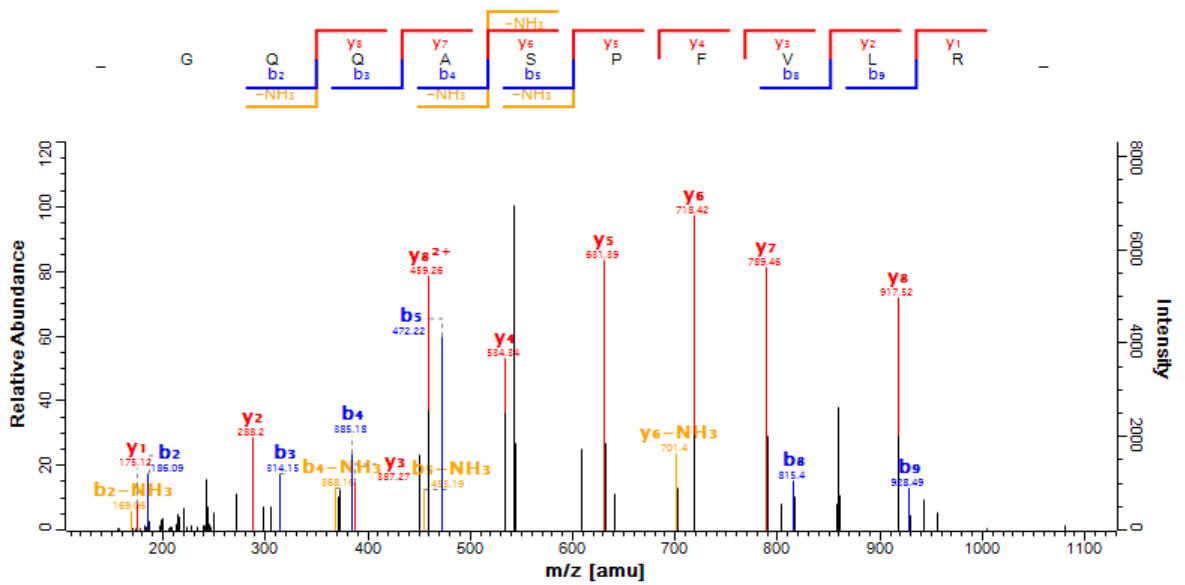

**Protein Group ID:** 4571  
**Protein Accession Numbers:** Q9BUL9  
**Gene Names:** RPP25  
**Peptide Sequence:** RSQPEPGVADEDQTA  
**Total Number of Spectra:** 5  
**Number of Replicates (out of 8):** 5  
**Best Match Score:** 123.76  
**Best Match Posterior Error Probability:** 8.68E-05  
**Best Match Spectrum:**

**Scan number** 10753      **Raw file** A549-US-Mock-top20CID-Elite-2ug-B14  
**Method** ITMS; CID      **Genenames** RPP25

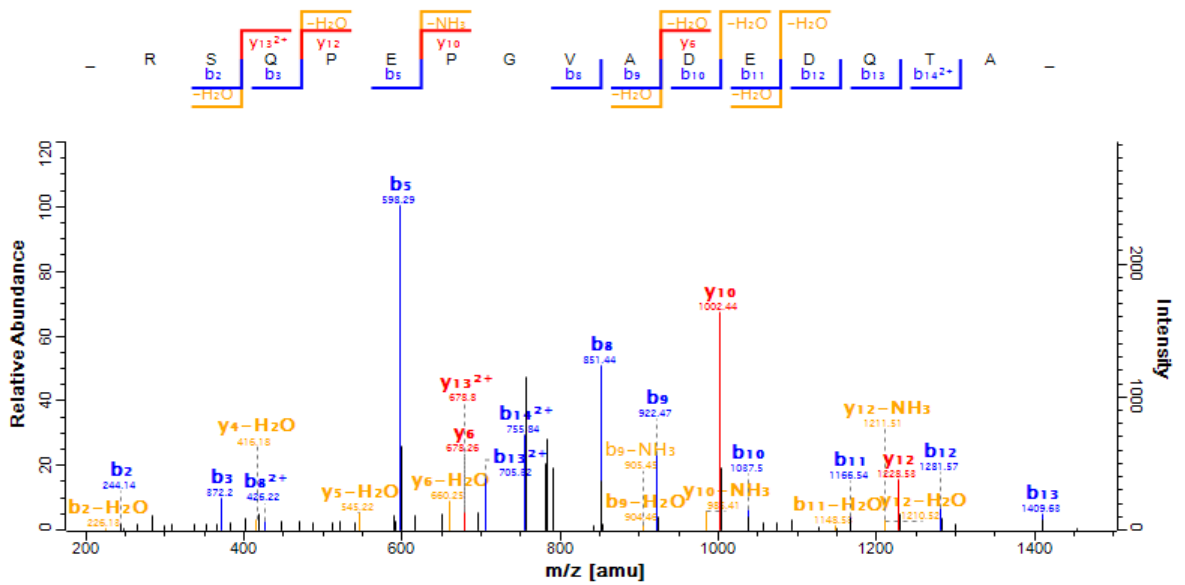

**Protein Group ID:** 4576  
**Protein Accession Numbers:** Q9BUW7  
**Gene Names:** C9orf16  
**Peptide Sequence:** LQELLESNR  
**Total Number of Spectra:** 1  
**Number of Replicates (out of 8):** 1  
**Best Match Score:** 89.171  
**Best Match Posterior Error Probability:** 0.003784  
**Best Match Spectrum:**

**Scan number** 23105      **Raw file** A549-US-Mock-top20CID-Elite-2ug-B12  
**Method** ITMS; CID      **Genenames** C9orf16

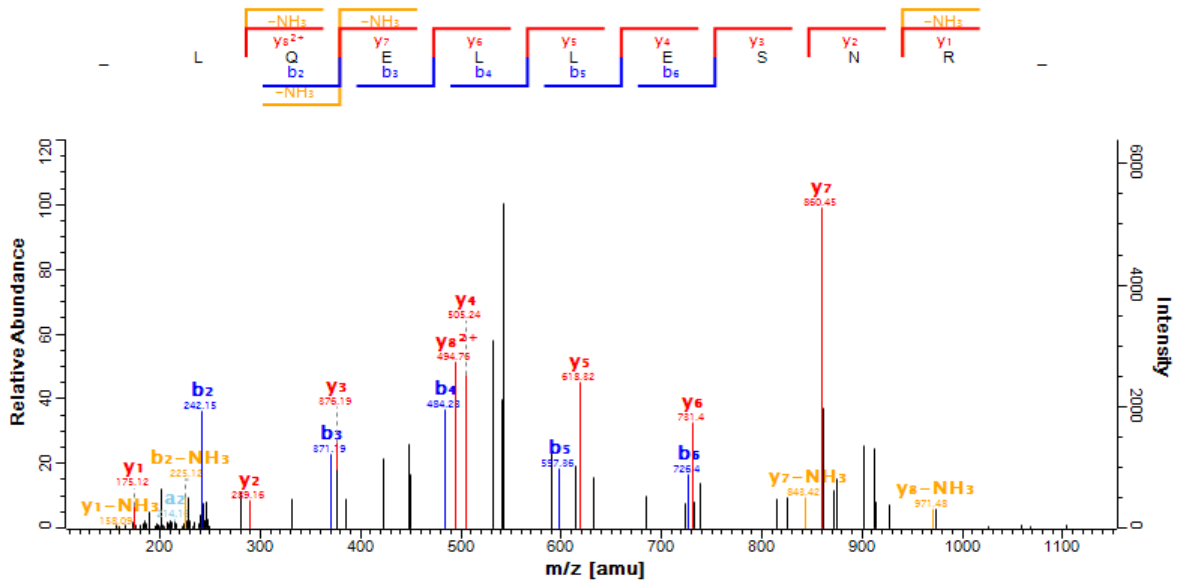



**Protein Group ID:** 4582  
**Protein Accession Numbers:** Q9BV81  
**Gene Names:** TMEM93  
**Peptide Sequence:** GNAAVLDYCR  
**Total Number of Spectra:** 4  
**Number of Replicates (out of 8):** 4  
**Best Match Score:** 99.283  
**Best Match Posterior Error Probability:** 0.00081781  
**Best Match Spectrum:**

**Scan number** 21799      **Raw file** A549-US-WT-top20CID-Elite-2ug-814  
**Method** ITMS; CID      **Genenames** TMEM93

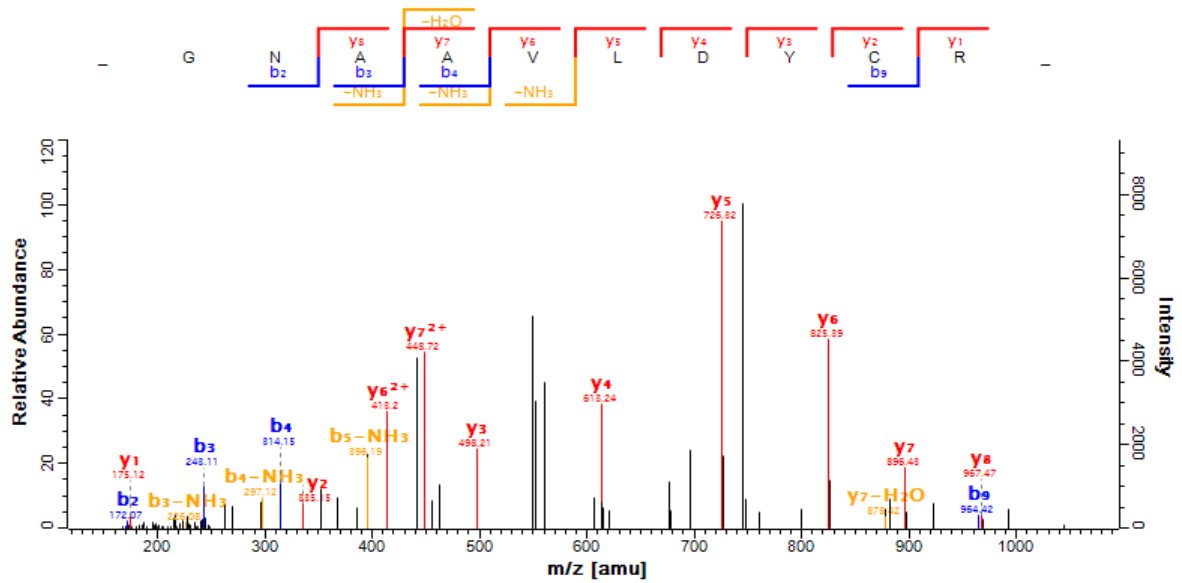

**Protein Group ID:** 4584  
**Protein Accession Numbers:** Q9BVC3  
**Gene Names:** DSCC1  
**Peptide Sequence:** LLMENPYEGPDSQK  
**Total Number of Spectra:** 1  
**Number of Replicates (out of 8):** 1  
**Best Match Score:** 91.307  
**Best Match Posterior Error Probability:** 0.001073  
**Best Match Spectrum:**

**Scan number** 34925      **Raw file** A549-US-Mock-top20CID-Elite-2ug-B11  
**Method** ITMS; CID      **Genenames** DSCC1

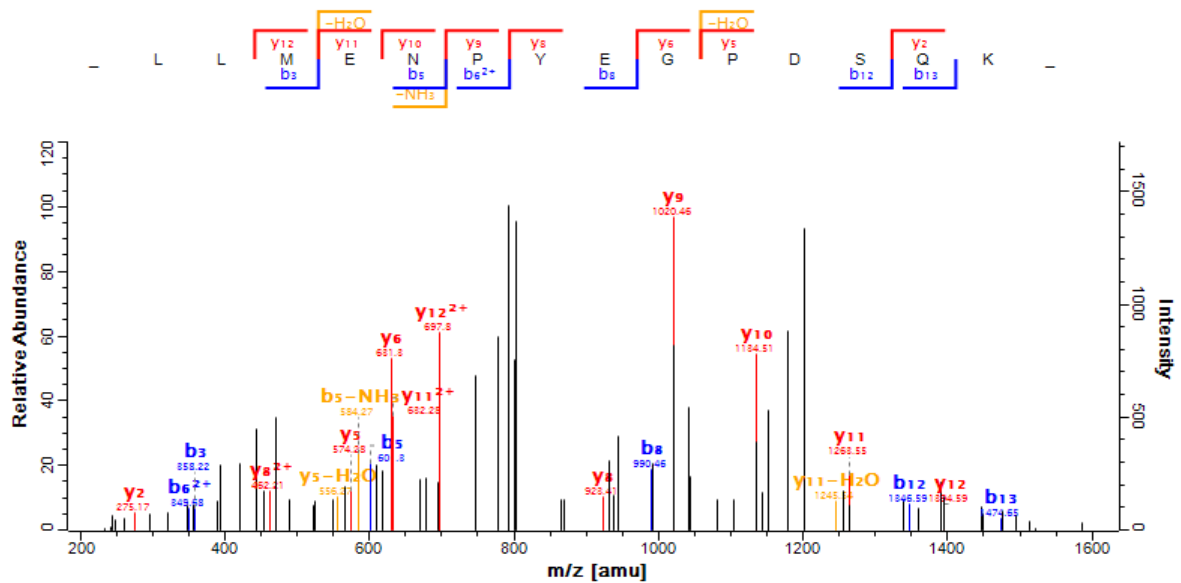

**Protein Group ID:** 4591  
**Protein Accession Numbers:** Q9BVM4  
**Gene Names:** A2LD1  
**Peptide Sequence:** ALVFVYGTK  
**Total Number of Spectra:** 5  
**Number of Replicates (out of 8):** 4  
**Best Match Score:** 128.27  
**Best Match Posterior Error Probability:** 6.04E-05  
**Best Match Spectrum:**

**Scan number** 84899      **Raw file** A549-US-Mock-top20CID-Elite-2ug-B13  
**Method** ITMS; CID      **Genenames** A2LD1

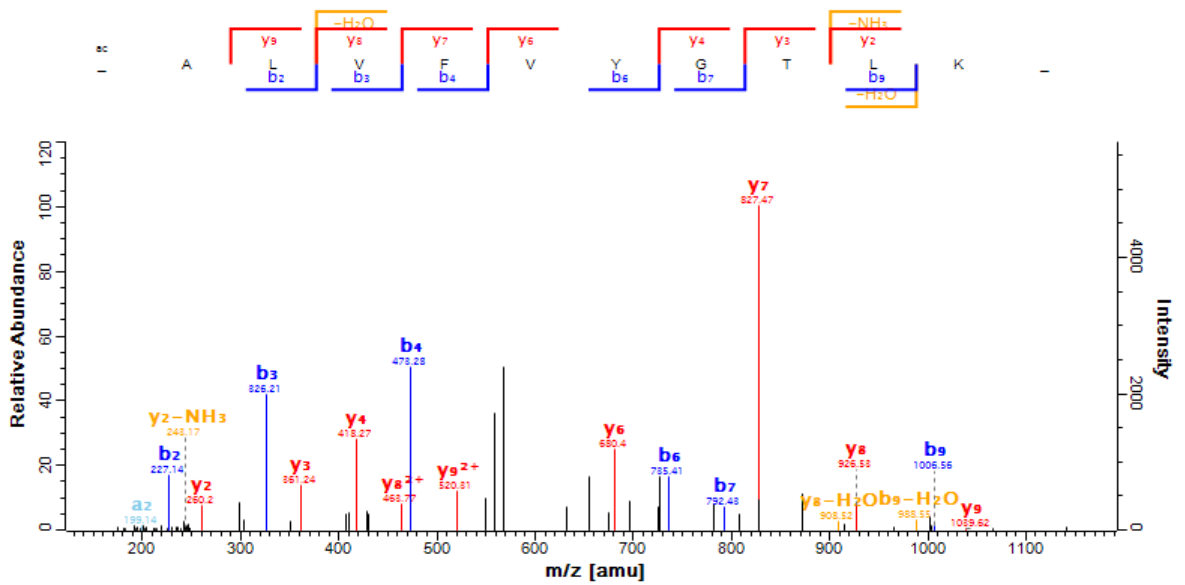

**Protein Group ID:** 4595  
**Protein Accession Numbers:** Q9BW61  
**Gene Names:** DDA1  
**Peptide Sequence:** TDSPDMHEDT  
**Total Number of Spectra:** 2  
**Number of Replicates (out of 8):** 2  
**Best Match Score:** 84.615  
**Best Match Posterior Error Probability:** 0.003302  
**Best Match Spectrum:**

**Scan number** 5700      **Raw file** A549-US-WT-top20CID-Elite-2ug-B13  
**Method** ITMS; CID      **Genenames** DDA1

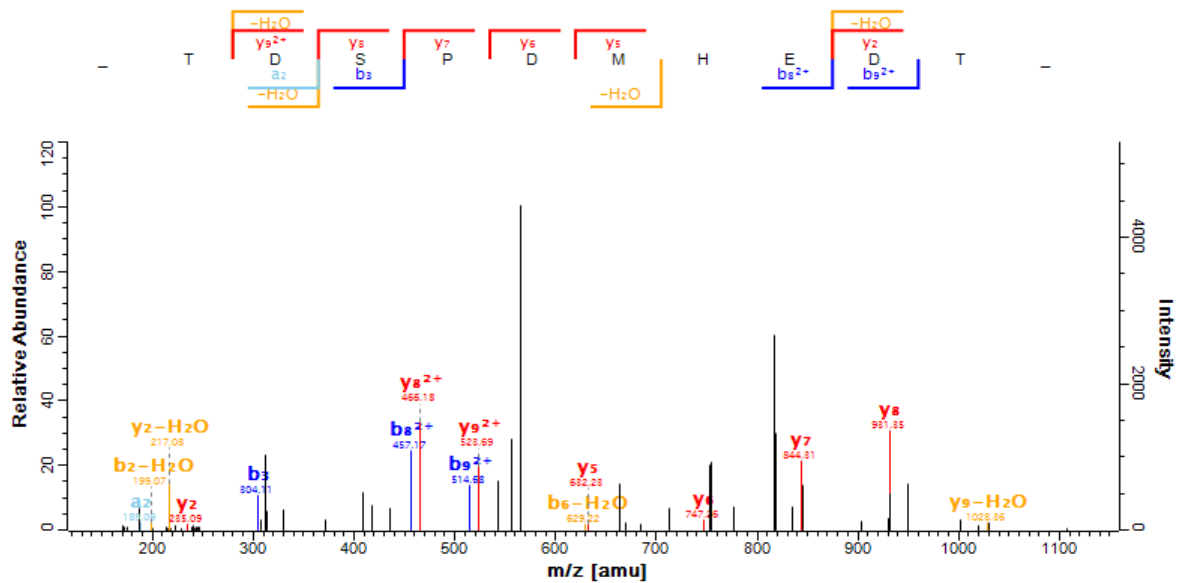

**Protein Group ID:** 4596  
**Protein Accession Numbers:** Q9BW72  
**Gene Names:** HIGD2A  
**Peptide Sequence:** IAAQGFTVAAILLGLAVTAMK  
**Total Number of Spectra:** 2  
**Number of Replicates (out of 8):** 2  
**Best Match Score:** 136.66  
**Best Match Posterior Error Probability:** 2.83E-14  
**Best Match Spectrum:**

**Scan number** 96196      **Raw file** A549-US-Mock-top20CID-Elite-2ug-B12  
**Method** ITMS; CID      **Genenames** HIGD2A

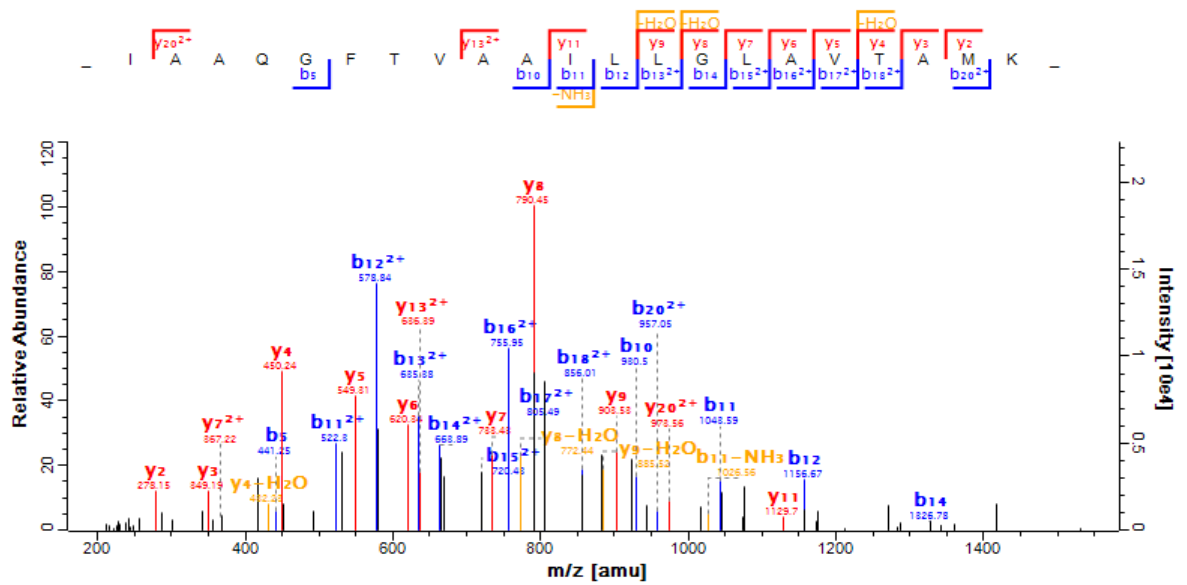

**Protein Group ID:** 4618  
**Protein Accession Numbers:** Q9BXW9; Q9BXW9-2  
**Gene Names:** FANCD2  
**Peptide Sequence:** HREDVLSLETFLDTR  
**Total Number of Spectra:** 2  
**Number of Replicates (out of 8):** 2  
**Best Match Score:** 134.25  
**Best Match Posterior Error Probability:** 0.00033567  
**Best Match Spectrum:**

**Scan number** 80956      **Raw file** A549-US-Mock-top20CID-Elite-2ug-B12  
**Method** ITMS; CID      **Genenames** FANCD2

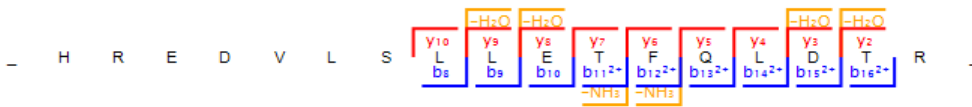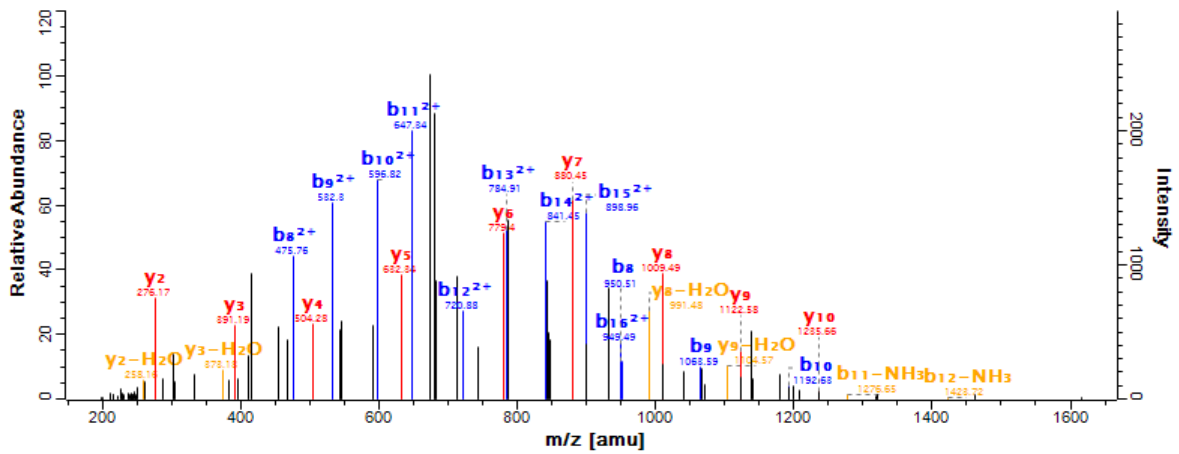

**Protein Group ID:** 4625  
**Protein Accession Numbers:** Q9BYC9  
**Gene Names:** MRPL20  
**Peptide Sequence:** VLADLAIYEPK  
**Total Number of Spectra:** 11  
**Number of Replicates (out of 8):** 8  
**Best Match Score:** 140.78  
**Best Match Posterior Error Probability:** 2.23E-05  
**Best Match Spectrum:**

**Scan number** 51373      **Raw file** A549-US-WT-top20CID-Elite-2ug-B12  
**Method** ITMS; CID      **Genenames** MRPL20

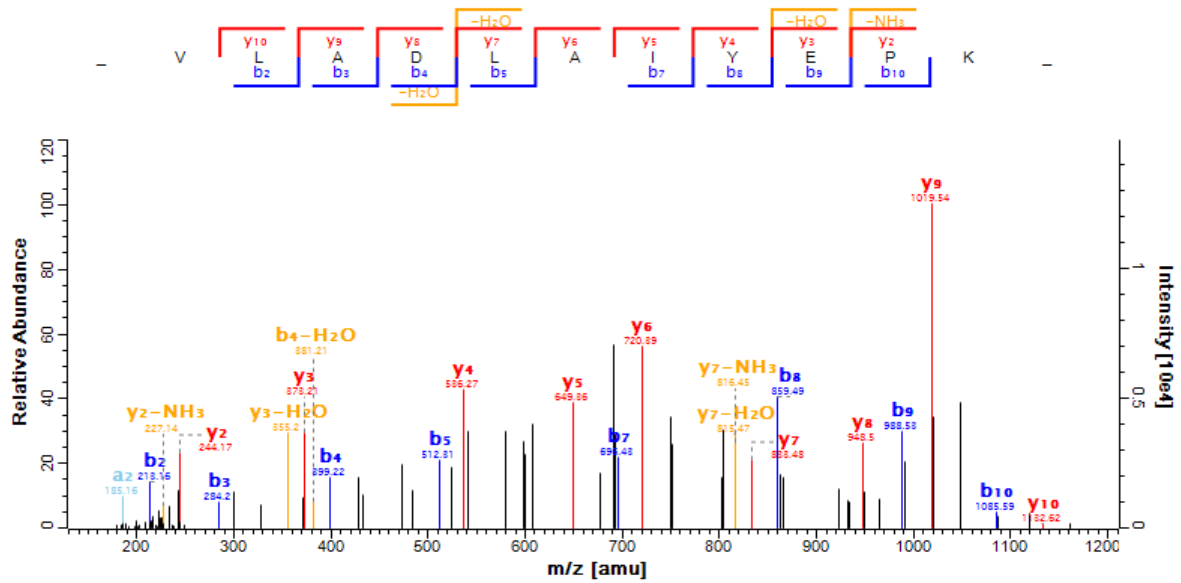

**Protein Group ID:** 4636

**Protein Accession Numbers:** Q9BYV8; Q9BYV8-2; Q9BYV8-5; Q9BYV8-3

**Gene Names:** CEP41

**Peptide Sequence:** SAQNLPGGGPASHSNPR

**Total Number of Spectra:** 2

**Number of Replicates (out of 8):** 2

**Best Match Score:** 103.13

**Best Match Posterior Error Probability:** 0.0001502

**Best Match Spectrum:**

**Scan number** 8499      **Raw file** A549-US-WT-top20CID-Elite-2ug-B13  
**Method** ITMS; CID      **Genenames** CEP41

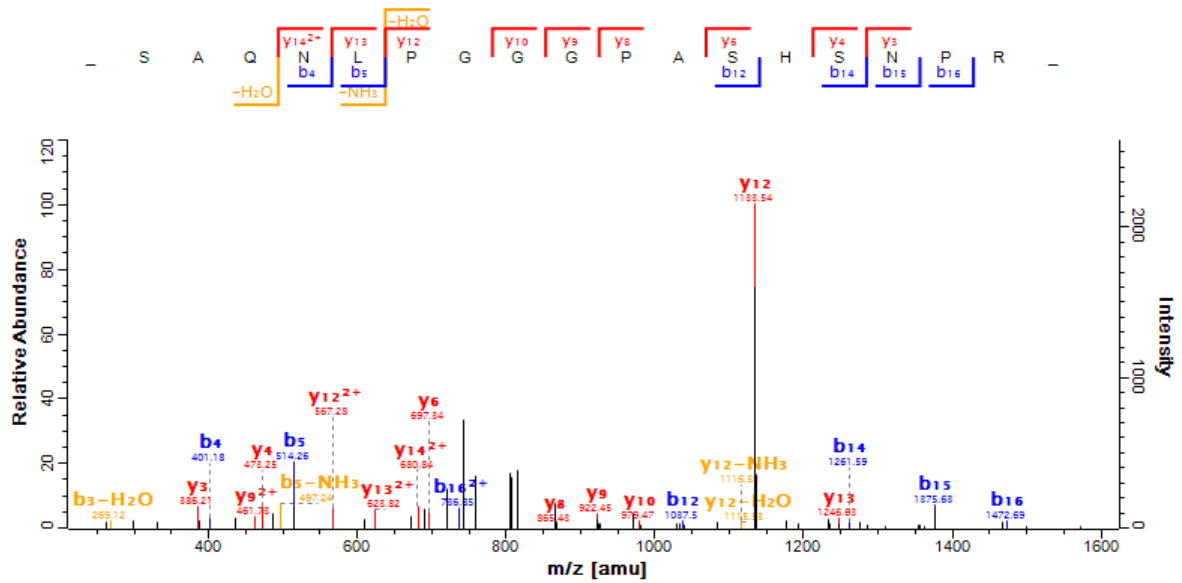



**Protein Group ID:** 4646  
**Protein Accession Numbers:** Q9BZL1  
**Gene Names:** UBL5  
**Peptide Sequence:** CNTDDTIGDLK  
**Total Number of Spectra:** 4  
**Number of Replicates (out of 8):** 4  
**Best Match Score:** 180.24  
**Best Match Posterior Error Probability:** 8.26E-10  
**Best Match Spectrum:**

**Scan number** 20178      **Raw file** A549-US-Mock-top20CID-Elite-2ug-B12  
**Method** ITMS; CID      **Genenames** UBL5

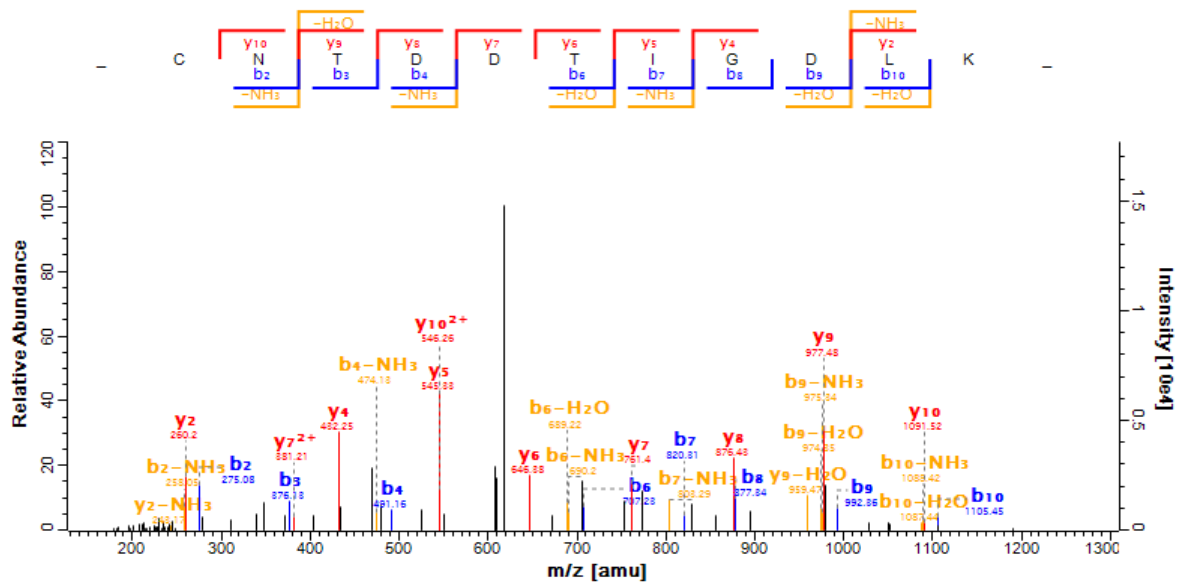

**Protein Group ID:** 4660

**Protein Accession Numbers:** Q9C0F1-2; Q9C0F1

**Gene Names:** CEP44

**Peptide Sequence:** SEVERPASIPLSSGYSTASSTPR

**Total Number of Spectra:** 8

**Number of Replicates (out of 8):** 5

**Best Match Score:** 87.659

**Best Match Posterior Error Probability:** 6.61E-05

**Best Match Spectrum:**

|                    |           |                  |                                     |
|--------------------|-----------|------------------|-------------------------------------|
| <b>Scan number</b> | 34854     | <b>Raw file</b>  | A549-US-Mock-top20CID-Elite-2ug-B13 |
| <b>Method</b>      | ITMS; CID | <b>Genenames</b> | CEP44                               |

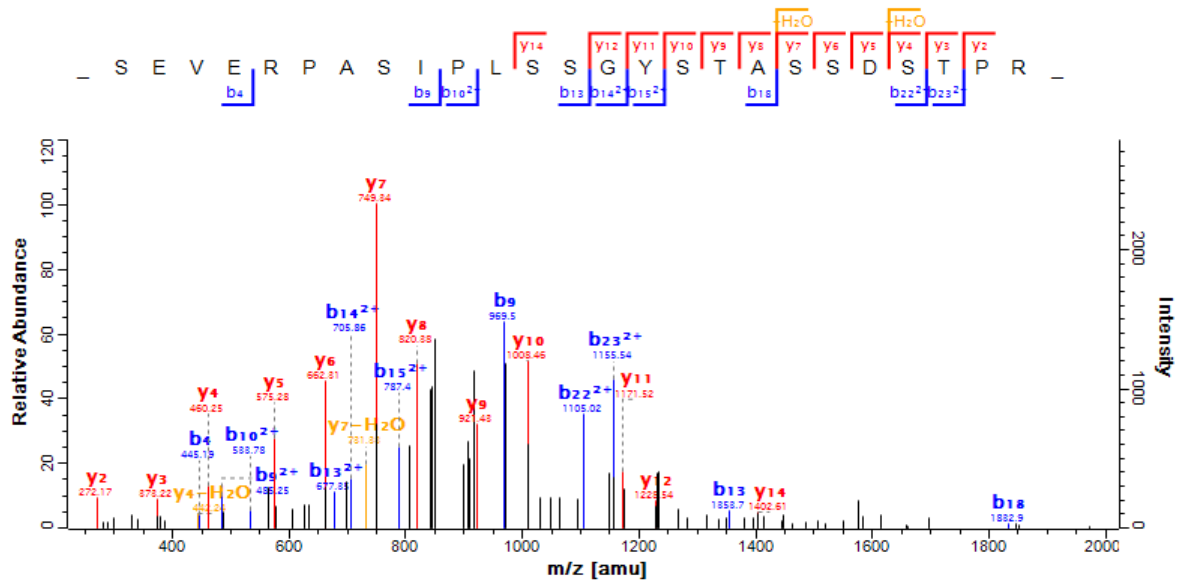

**Protein Group ID:** 4665  
**Protein Accession Numbers:** Q9GZP8; Q9GZP8-2  
**Gene Names:** IMUP  
**Peptide Sequence:** MEFDLGAALEPTSQK  
**Total Number of Spectra:** 7  
**Number of Replicates (out of 8):** 7  
**Best Match Score:** 115.1  
**Best Match Posterior Error Probability:** 0.0001291  
**Best Match Spectrum:**

**Scan number** 76448      **Raw file** A549-US-WT-top20CID-Elite-2ug-B13  
**Method** ITMS; CID      **Genenames** IMUP

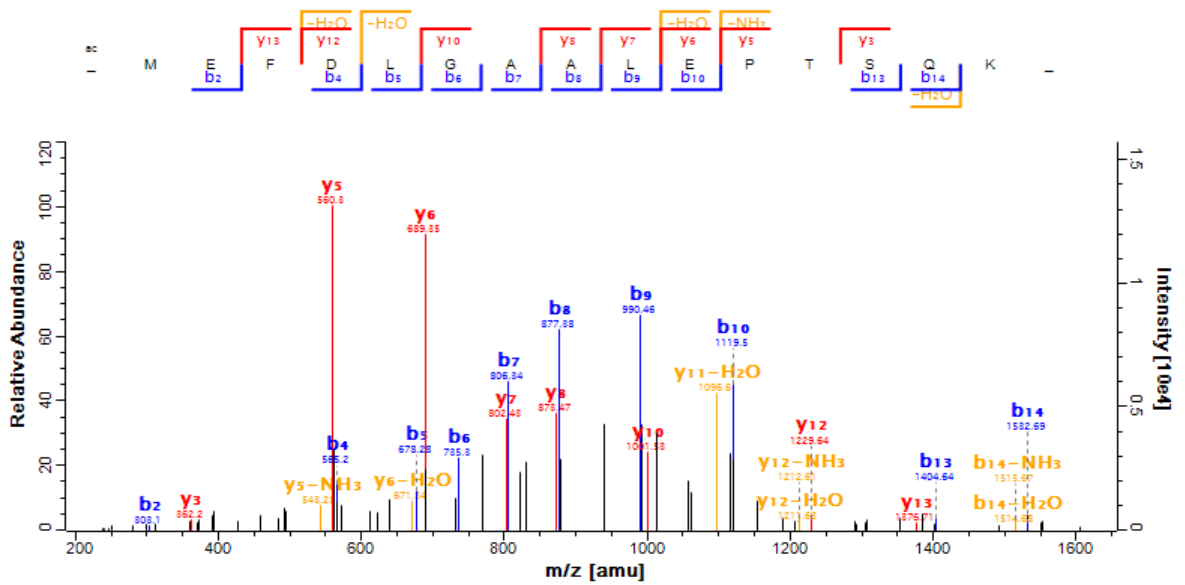

**Protein Group ID:** 4671  
**Protein Accession Numbers:** Q9GZY4  
**Gene Names:** C7orf44  
**Peptide Sequence:** WHLDEVFLK  
**Total Number of Spectra:** 3  
**Number of Replicates (out of 8):** 3  
**Best Match Score:** 106.29  
**Best Match Posterior Error Probability:** 0.00029143  
**Best Match Spectrum:**

|                    |           |                  |                                   |
|--------------------|-----------|------------------|-----------------------------------|
| <b>Scan number</b> | 72852     | <b>Raw file</b>  | A549-US-WT-top20CID-Elite-2ug-B14 |
| <b>Method</b>      | ITMS; CID | <b>Genenames</b> | C7orf44                           |

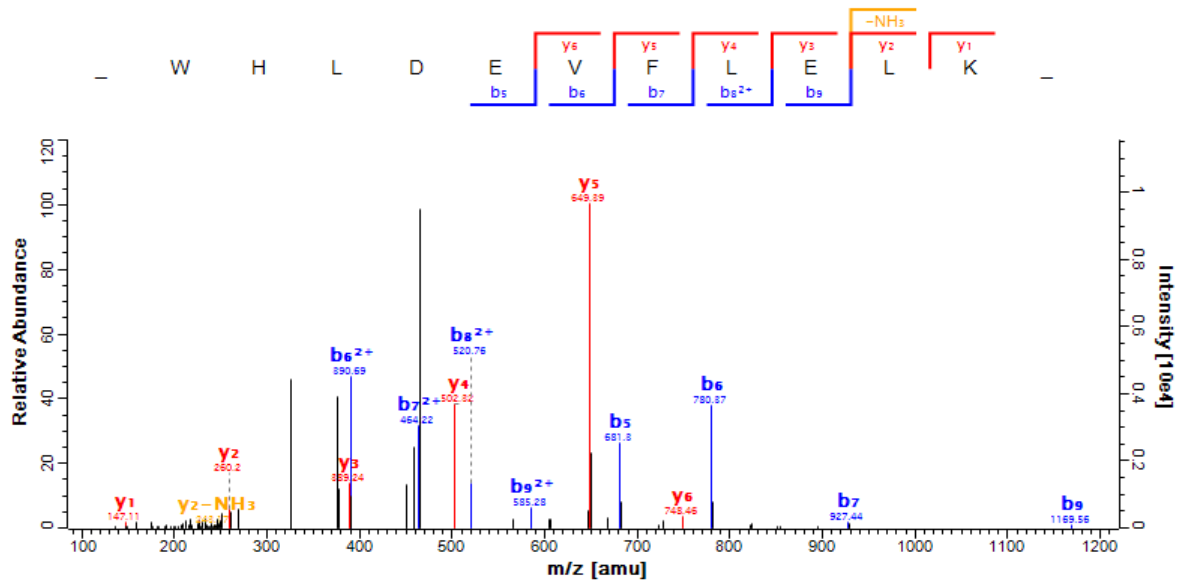

**Protein Group ID:** 4678  
**Protein Accession Numbers:** Q9H093  
**Gene Names:** NUAK2  
**Peptide Sequence:** VGEQAEPAHGEGHPGSDSAR  
**Total Number of Spectra:** 3  
**Number of Replicates (out of 8):** 2  
**Best Match Score:** 81.016  
**Best Match Posterior Error Probability:** 0.00081093  
**Best Match Spectrum:**

**Scan number** 3544      **Raw file** A549-US-WT-top20CID-Elite-2ug-811  
**Method** ITMS; CID      **Genenames** NUAK2

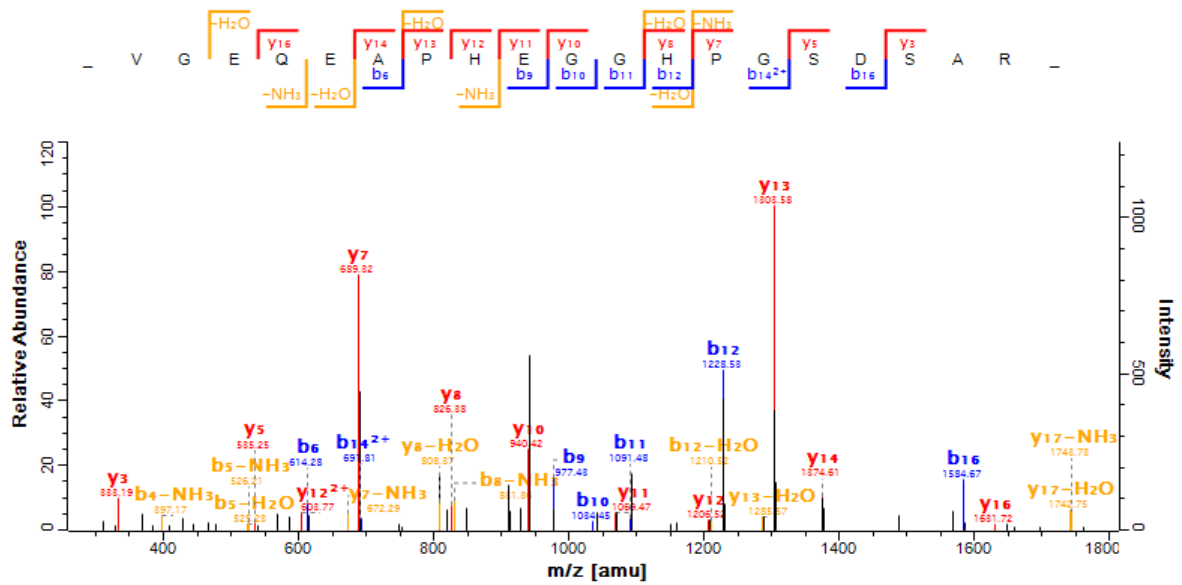

**Protein Group ID:** 4695  
**Protein Accession Numbers:** Q9H0U6  
**Gene Names:** MRPL18  
**Peptide Sequence:** NLELLSVAR  
**Total Number of Spectra:** 2  
**Number of Replicates (out of 8):** 2  
**Best Match Score:** 97.813  
**Best Match Posterior Error Probability:** 0.0020707  
**Best Match Spectrum:**

**Scan number** 46707      **Raw file** A549-US-Mock-top20CID-Elite-2ug-B14  
**Method** ITMS; CID      **Genenames** MRPL18

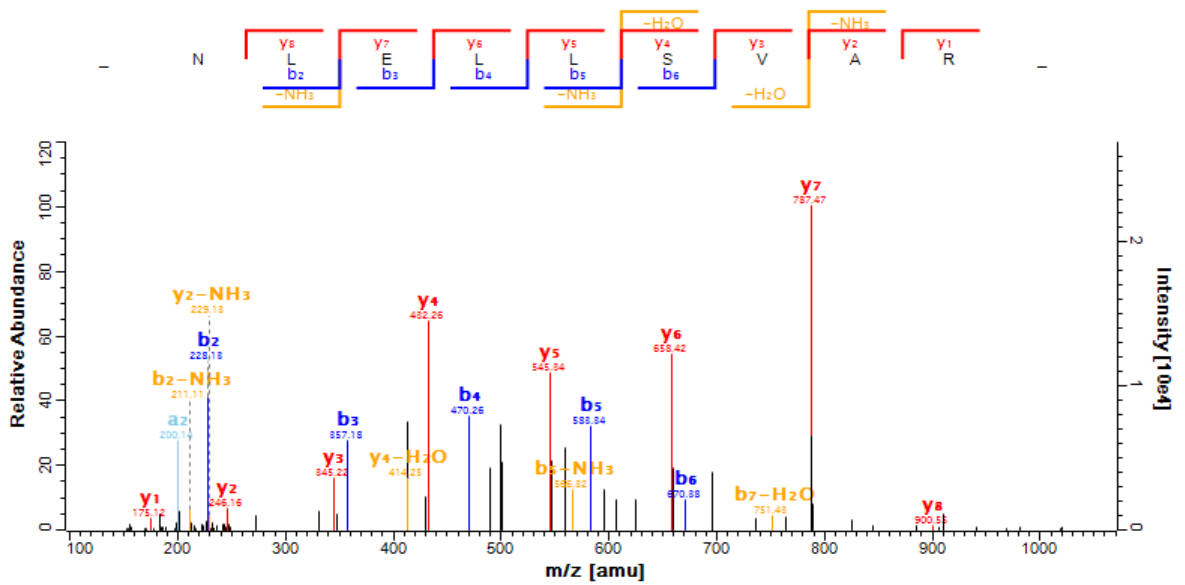

**Protein Group ID:** 4703  
**Protein Accession Numbers:** Q9H1C7  
**Gene Names:** CYSTM1  
**Peptide Sequence:** TTVYVVEDQR  
**Total Number of Spectra:** 5  
**Number of Replicates (out of 8):** 4  
**Best Match Score:** 185.96  
**Best Match Posterior Error Probability:** 1.24E-08  
**Best Match Spectrum:**

**Scan number** 19226      **Raw file** A549-US-Mock-top20CID-Elite-2ug-B13  
**Method** ITMS; CID      **Genenames** CYSTM1

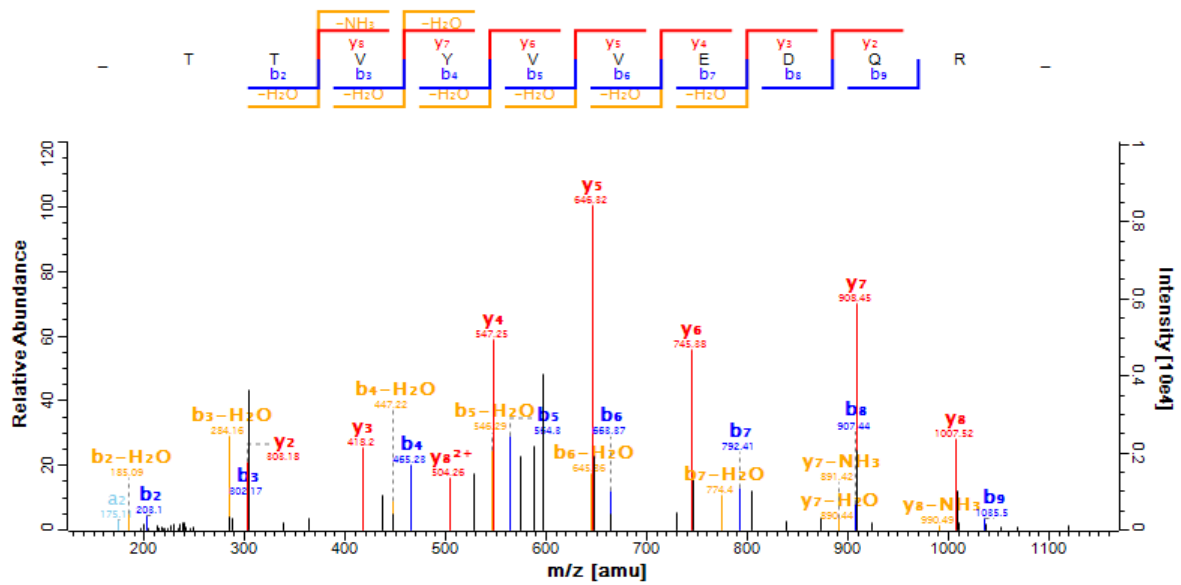

**Protein Group ID:** 4704  
**Protein Accession Numbers:** Q9H1D9  
**Gene Names:** POLR3F  
**Peptide Sequence:** EGTVGSVVDGHMK  
**Total Number of Spectra:** 1  
**Number of Replicates (out of 8):** 1  
**Best Match Score:** 105.03  
**Best Match Posterior Error Probability:** 0.0020341  
**Best Match Spectrum:**

**Scan number** 7940      **Raw file** A549-US-WT-top20CID-Elite-2ug-B11  
**Method** ITMS; CID      **Genenames** POLR3F

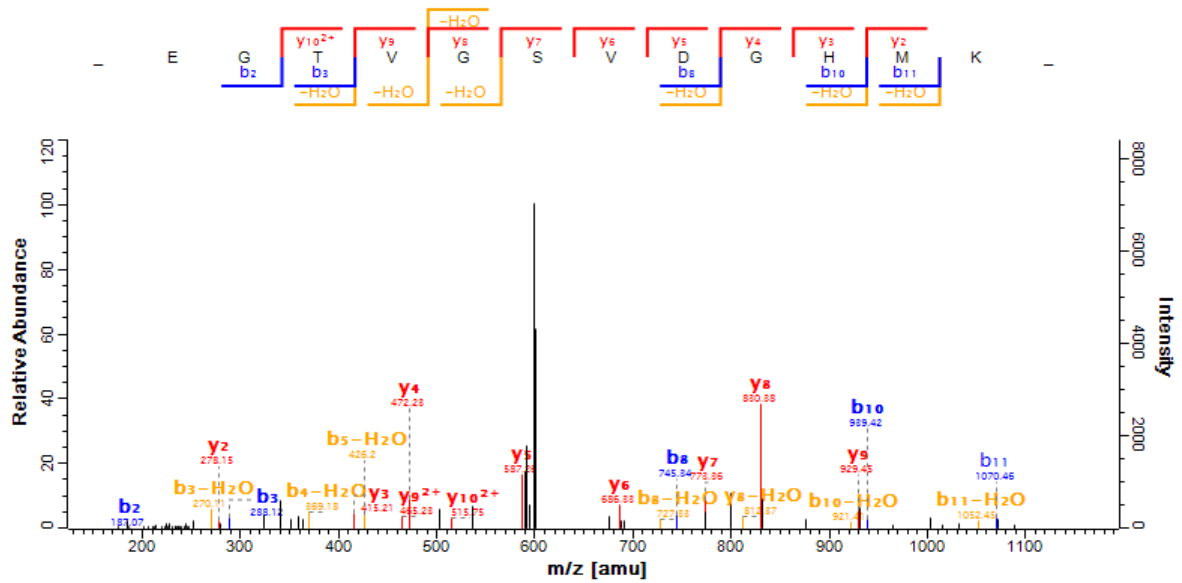



**Protein Group ID:** 4708  
**Protein Accession Numbers:** Q9H1K0  
**Gene Names:** ZFYVE20  
**Peptide Sequence:** VWSGPPAVGQER  
**Total Number of Spectra:** 1  
**Number of Replicates (out of 8):** 1  
**Best Match Score:** 83.182  
**Best Match Posterior Error Probability:** 0.0026403  
**Best Match Spectrum:**

**Scan number** 26833      **Raw file** A549-US-Mock-top20CID-Elite-2ug-B11  
**Method** ITMS; CID      **Genenames** ZFYVE20

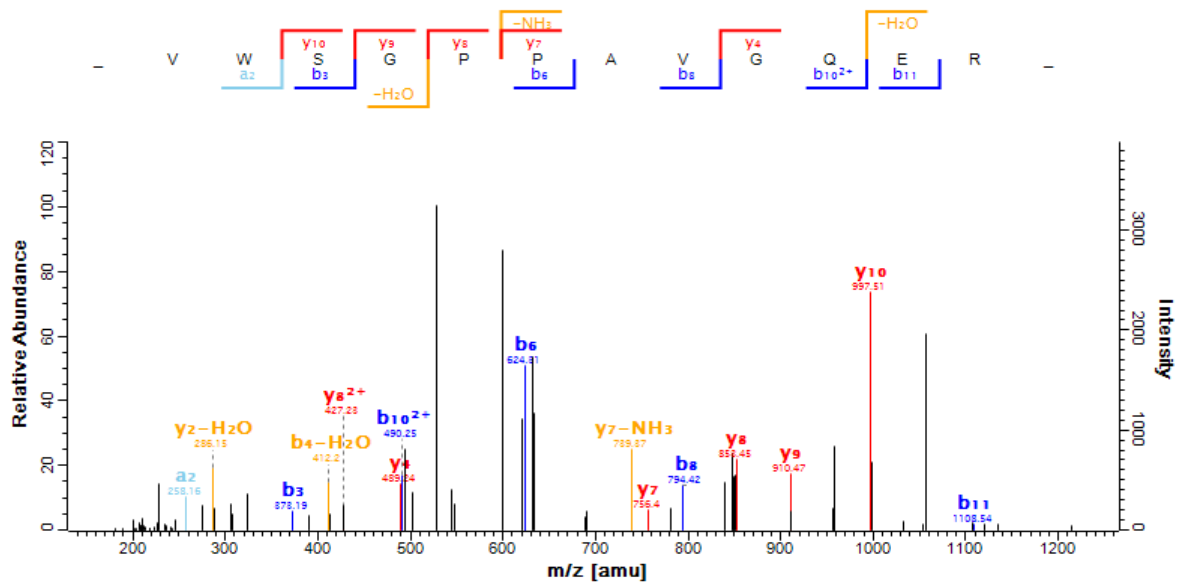

**Protein Group ID:** 4711  
**Protein Accession Numbers:** Q9H1Z9  
**Gene Names:** TSPAN10  
**Peptide Sequence:** LLGALAAR  
**Total Number of Spectra:** 6  
**Number of Replicates (out of 8):** 6  
**Best Match Score:** 124.37  
**Best Match Posterior Error Probability:** 0.0018004  
**Best Match Spectrum:**

**Scan number** 21218      **Raw file** A549-US-Mock-top20CID-Elite-2ug-B14  
**Method** ITMS; CID      **Genenames** TSPAN10

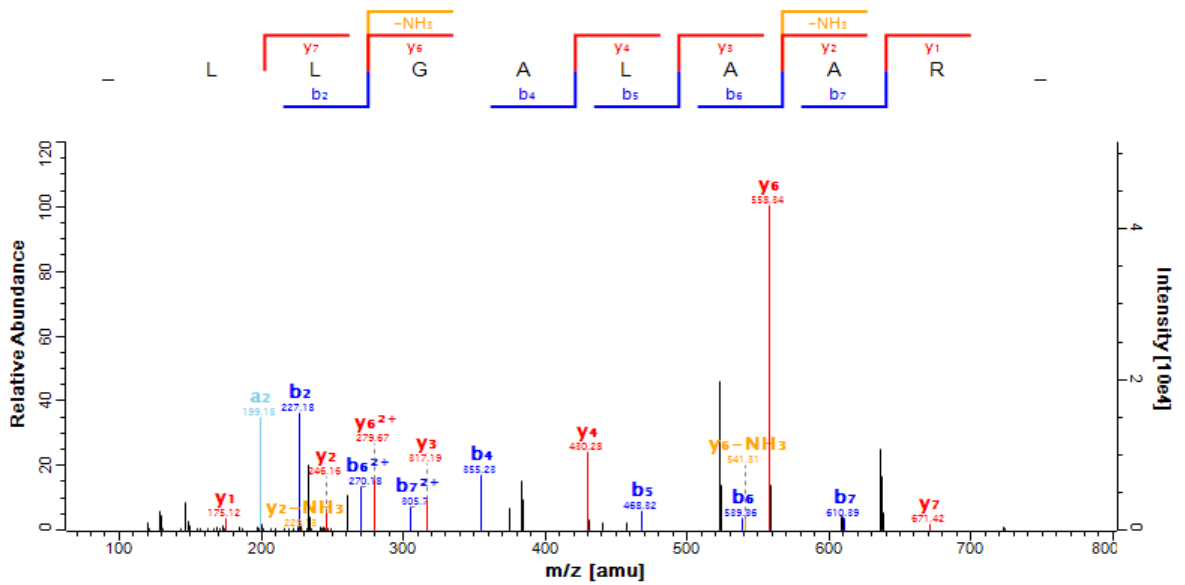

**Protein Group ID:** 4736  
**Protein Accession Numbers:** Q9H3Y8; Q9H3Y8-2  
**Gene Names:** PPDPF  
**Peptide Sequence:** AAIPSSGSLVATHDYR  
**Total Number of Spectra:** 1  
**Number of Replicates (out of 8):** 1  
**Best Match Score:** 93.51  
**Best Match Posterior Error Probability:** 0.00047234  
**Best Match Spectrum:**

**Scan number** 46649      **Raw file** A549-US-Mock-top20CID-Elite-2ug-B12  
**Method** ITMS; CID      **Genenames** PPDPF

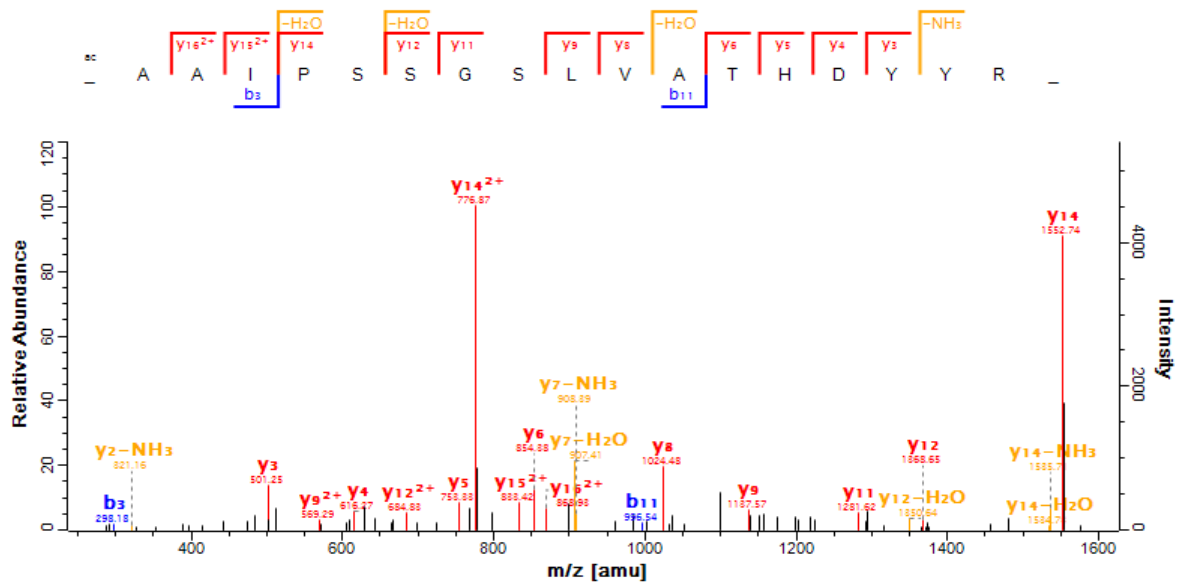

**Protein Group ID:** 4740

**Protein Accession Numbers:** Q9H467

**Gene Names:** CUEDC2

**Peptide Sequence:** ENLQPSSGVQGQVPISPEPLQRP EMLK

**Total Number of Spectra:** 4

**Number of Replicates (out of 8):** 3

**Best Match Score:** 92.01

**Best Match Posterior Error Probability:** 2.28E-05

**Best Match Spectrum:**

**Scan number** 51310      **Raw file** A549-US-Mock-top20CID-Elite-2ug-B13  
**Method** ITMS; CID      **Genenames** CUEDC2

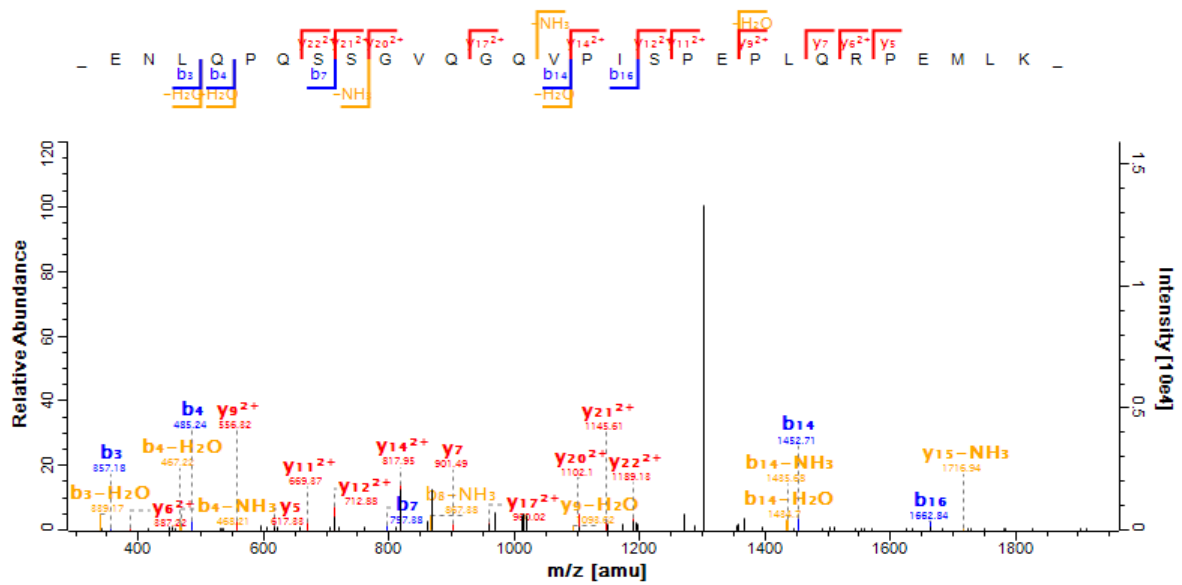

**Protein Group ID:** 4742  
**Protein Accession Numbers:** Q9H496  
**Gene Names:** IFRG15  
**Peptide Sequence:** VAGFNPALQLILTR  
**Total Number of Spectra:** 4  
**Number of Replicates (out of 8):** 4  
**Best Match Score:** 102.5  
**Best Match Posterior Error Probability:** 0.0002942  
**Best Match Spectrum:**

**Scan number** 75222      **Raw file** A549-US-Mock-top20CID-Elite-2ug-B12  
**Method** ITMS; CID      **Genenames** IFRG15

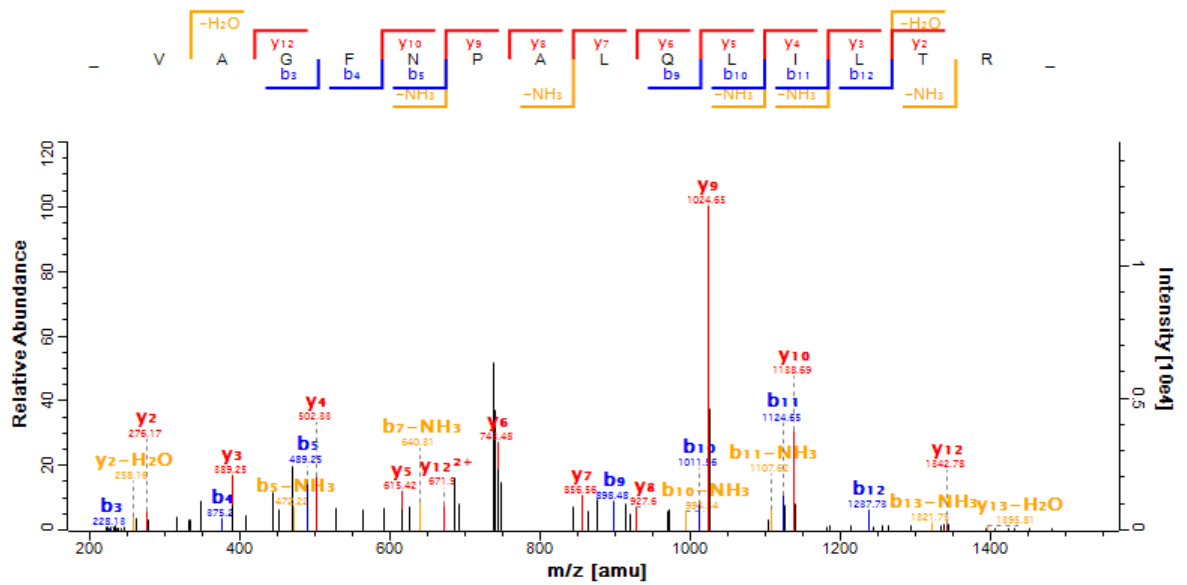

**Protein Group ID:** 4752  
**Protein Accession Numbers:** Q9H4Z3  
**Gene Names:** PCIF1  
**Peptide Sequence:** ENNISEEVEAPEVEPR  
**Total Number of Spectra:** 1  
**Number of Replicates (out of 8):** 1  
**Best Match Score:** 83.37  
**Best Match Posterior Error Probability:** 0.001418  
**Best Match Spectrum:**

**Scan number** 35016      **Raw file** A549-US-Mock-top20CID-Elite-2ug-B13  
**Method** ITMS; CID      **Genenames** PCIF1

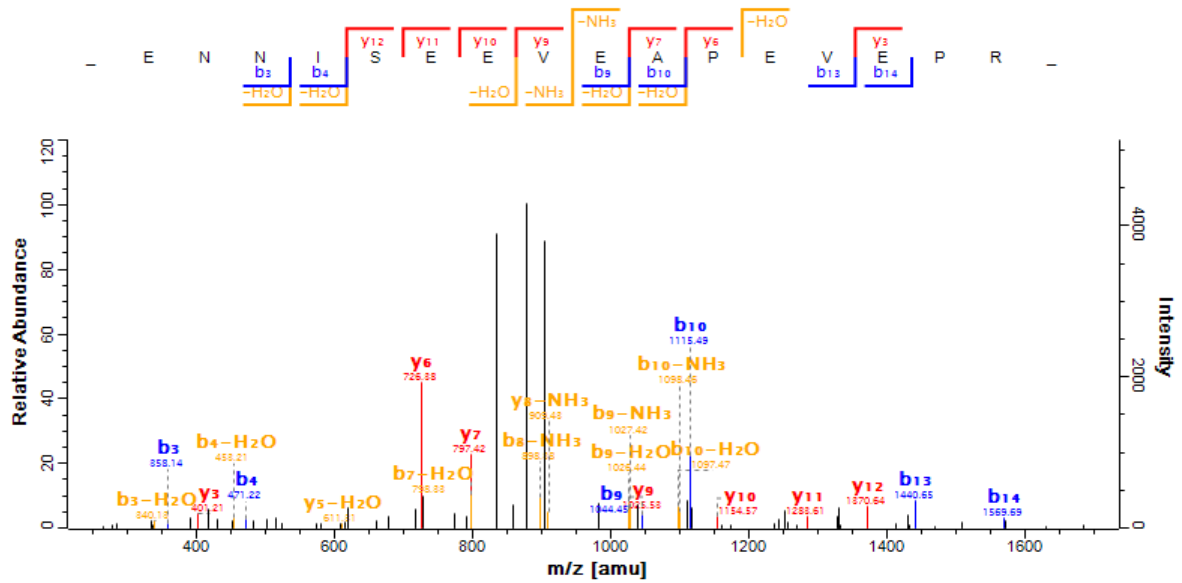

**Protein Group ID:** 4759  
**Protein Accession Numbers:** Q9H5X1  
**Gene Names:** FAM96A  
**Peptide Sequence:** VAAAMENPNLR  
**Total Number of Spectra:** 5  
**Number of Replicates (out of 8):** 4  
**Best Match Score:** 152.07  
**Best Match Posterior Error Probability:** 1.71E-05  
**Best Match Spectrum:**

**Scan number** 19335      **Raw file** A549-US-WT-top20CID-Elite-2ug-B14  
**Method** ITMS; CID      **Genenames** FAM96A

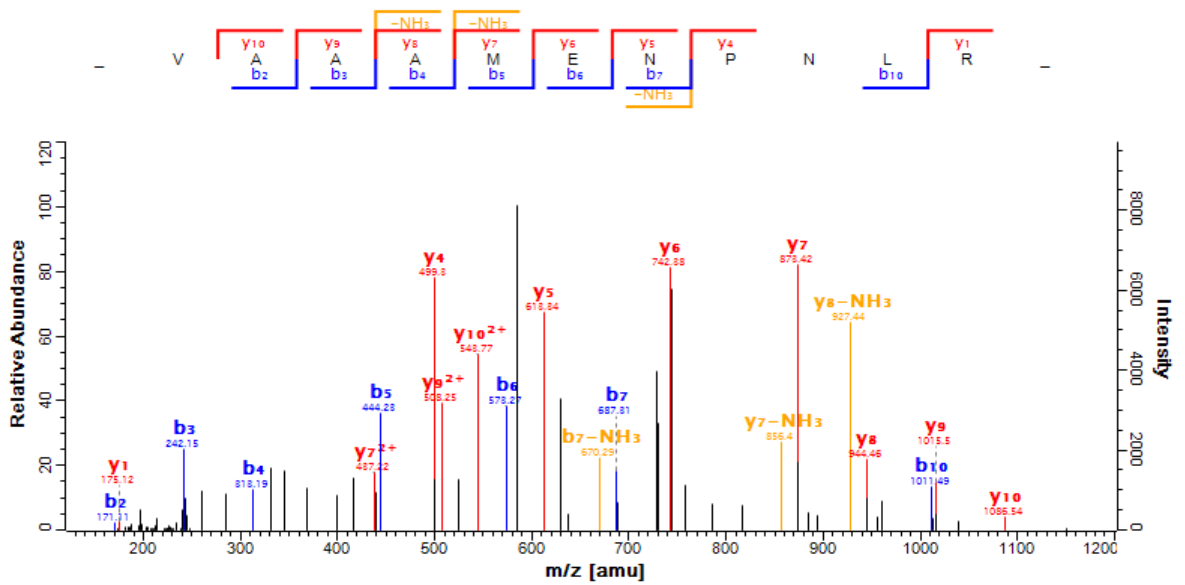

**Protein Group ID:** 4765  
**Protein Accession Numbers:** Q9H6U8-3; Q9H6U8  
**Gene Names:** ALG9  
**Peptide Sequence:** AGQVWAPEGSTAK  
**Total Number of Spectra:** 6  
**Number of Replicates (out of 8):** 5  
**Best Match Score:** 120.84  
**Best Match Posterior Error Probability:** 4.62E-05  
**Best Match Spectrum:**

**Scan number** 38930      **Raw file** A549-US-WT-top20CID-Elite-2ug-B13  
**Method** ITMS; CID      **Genenames** ALG9

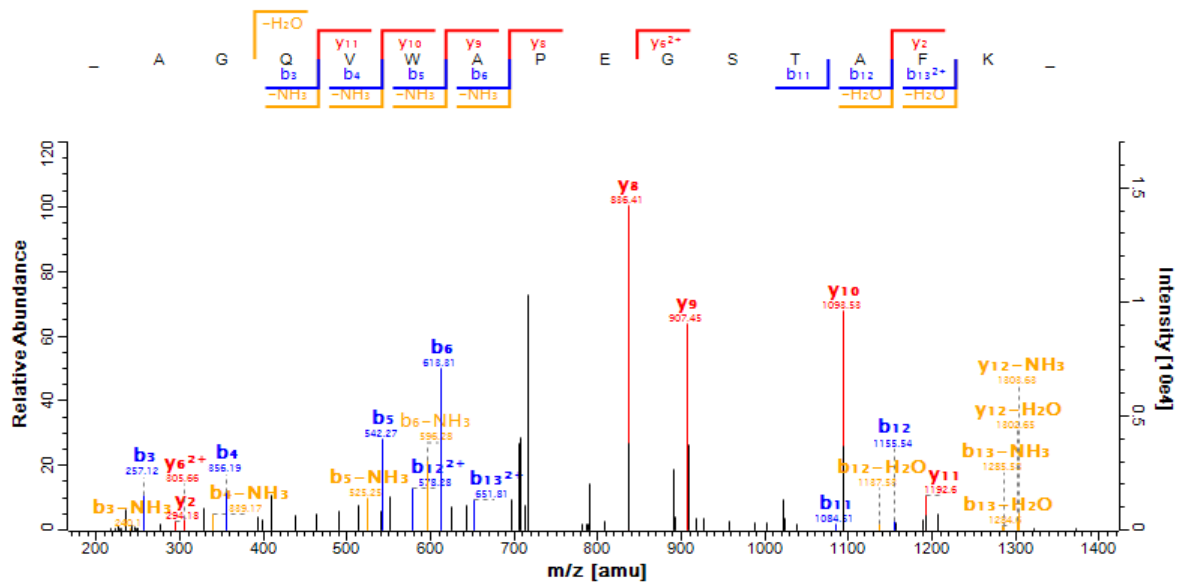



**Protein Group ID:** 4776  
**Protein Accession Numbers:** Q9H7Z3  
**Gene Names:** C14orf102  
**Peptide Sequence:** ESEEPNQGNGNANAAADTGHR  
**Total Number of Spectra:** 2  
**Number of Replicates (out of 8):** 2  
**Best Match Score:** 90.379  
**Best Match Posterior Error Probability:** 0.00036615  
**Best Match Spectrum:**

**Scan number** 3160      **Raw file** A549-US-WT-top20CID-Elite-2ug-B11  
**Method** ITMS; CID      **Genenames** C14orf102

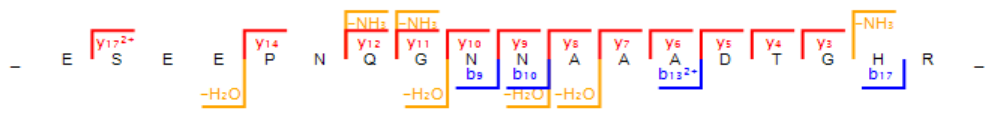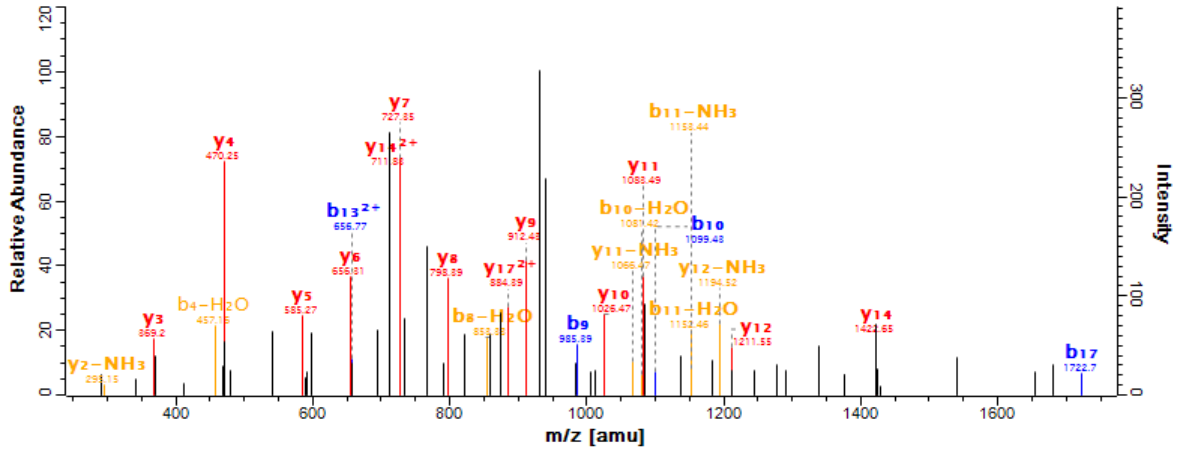

**Protein Group ID:** 4777  
**Protein Accession Numbers:** Q9H7Z6-2; Q9H7Z6  
**Gene Names:** KAT8  
**Peptide Sequence:** RPDSTWHSAEVIQSR  
**Total Number of Spectra:** 2  
**Number of Replicates (out of 8):** 1  
**Best Match Score:** 110.44  
**Best Match Posterior Error Probability:** 0.00029415  
**Best Match Spectrum:**

**Scan number** 20792      **Raw file** A549-US-Mock-top20CID-Elite-2ug-B13  
**Method** ITMS; CID      **Genenames** KAT8

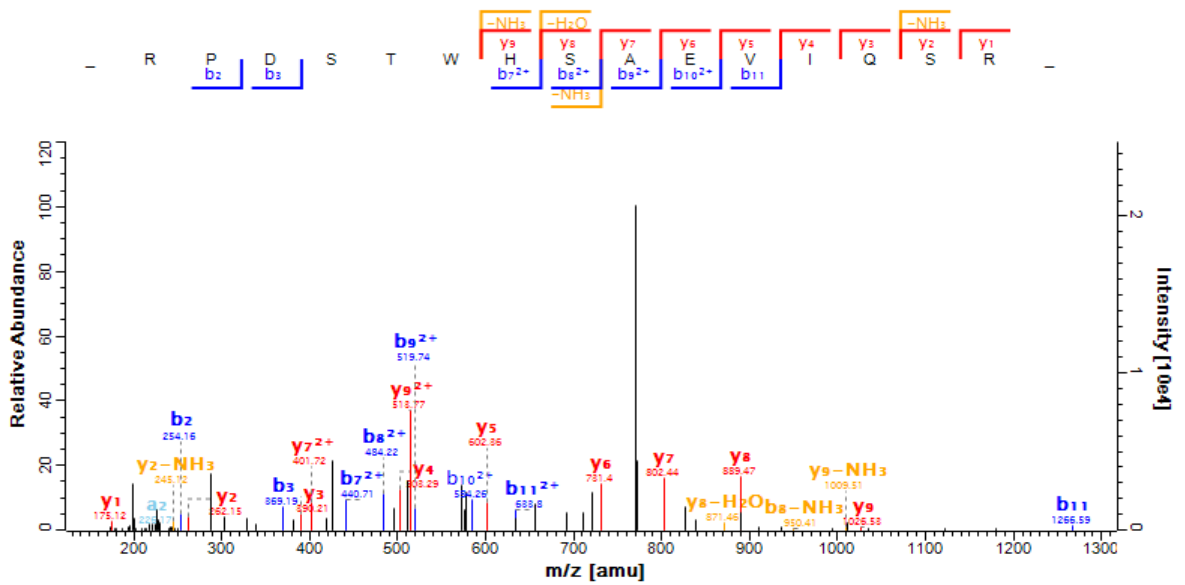

**Protein Group ID:** 4782  
**Protein Accession Numbers:** Q9H871  
**Gene Names:** RMND5A  
**Peptide Sequence:** LLNEVMVEHFFR  
**Total Number of Spectra:** 4  
**Number of Replicates (out of 8):** 4  
**Best Match Score:** 99.568  
**Best Match Posterior Error Probability:** 0.00052251  
**Best Match Spectrum:**

**Scan number** 65904      **Raw file** A549-US-WT-top20CID-Elite-2ug-B14  
**Method** ITMS; CID      **Genenames** RMND5A

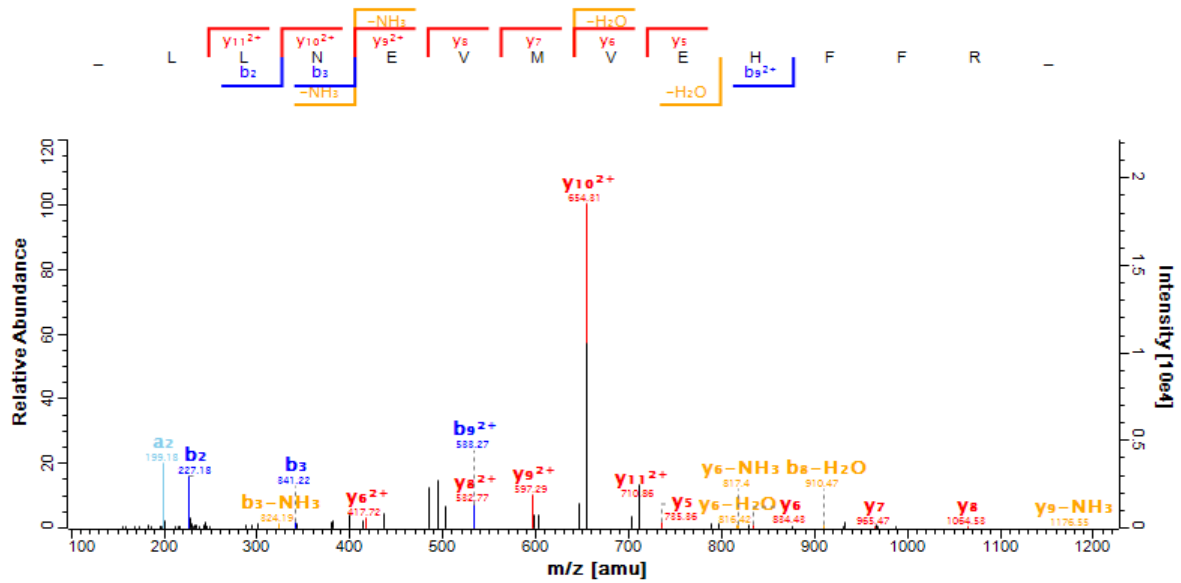

**Protein Group ID:** 4793  
**Protein Accession Numbers:** Q9H9F9  
**Gene Names:** ACTR5  
**Peptide Sequence:** LSIAVEQAK  
**Total Number of Spectra:** 1  
**Number of Replicates (out of 8):** 1  
**Best Match Score:** 99.688  
**Best Match Posterior Error Probability:** 0.0017975  
**Best Match Spectrum:**

**Scan number** 36833      **Raw file** A549-US-Mock-top20CID-Elite-2ug-B13  
**Method** ITMS; CID      **Genenames** ACTR5

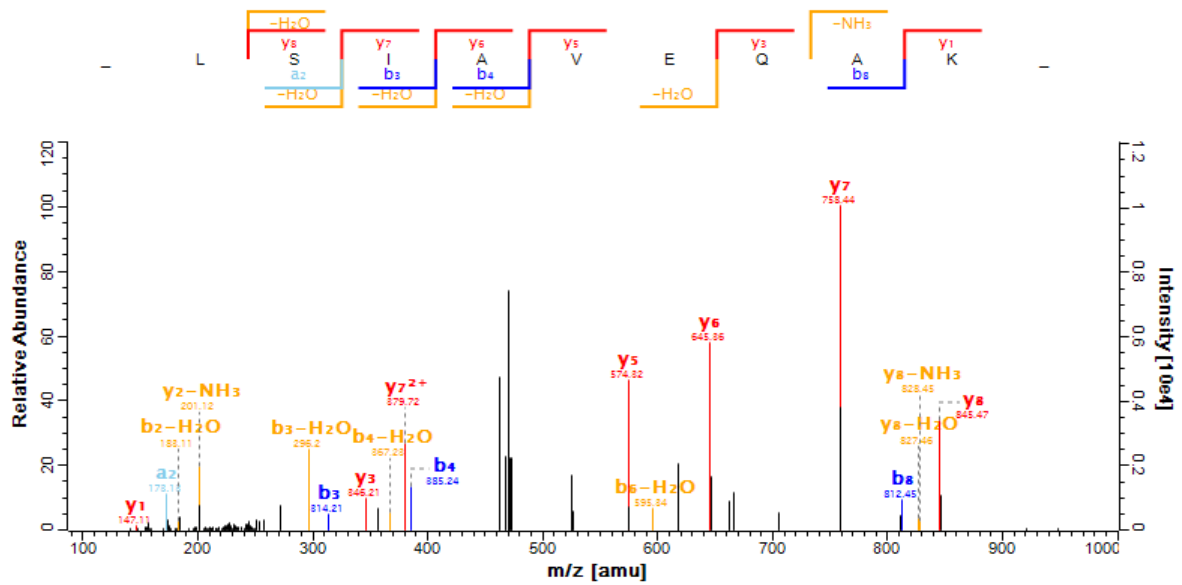

**Protein Group ID:** 4799  
**Protein Accession Numbers:** Q9H9Y2  
**Gene Names:** RPF1  
**Peptide Sequence:** MFASLFPHNPQFI<sup>+</sup>GR  
**Total Number of Spectra:** 2  
**Number of Replicates (out of 8):** 1  
**Best Match Score:** 95.094  
**Best Match Posterior Error Probability:** 0.00047094  
**Best Match Spectrum:**

**Scan number** 62045      **Raw file** A549-US-Mock-top20CID-Elite-2ug-B11  
**Method** ITMS; CID      **Genenames** RPF1

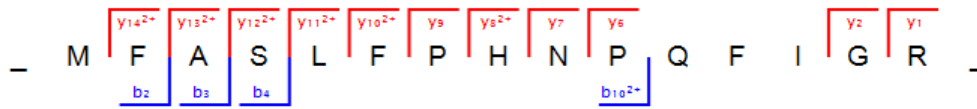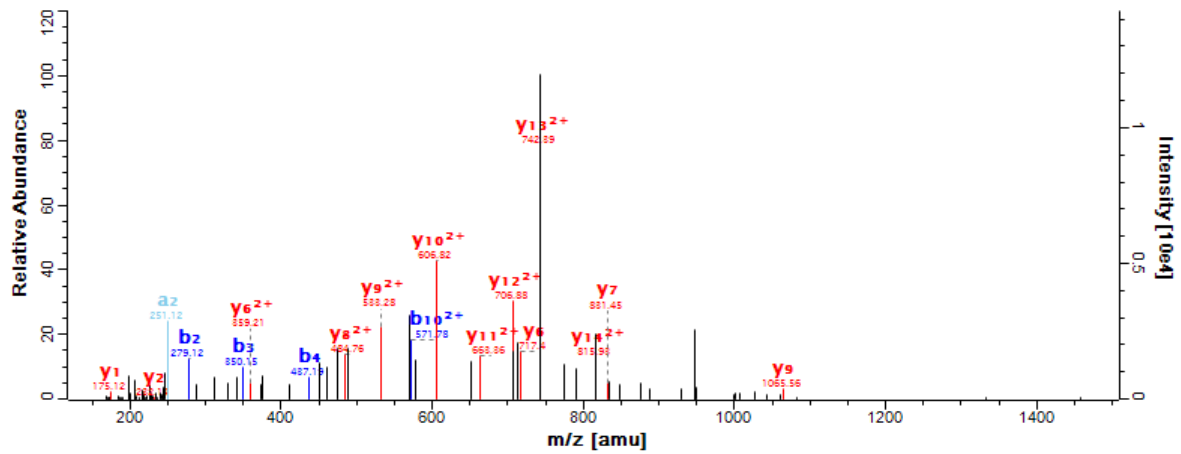

**Protein Group ID:** 4805  
**Protein Accession Numbers:** Q9HAV0; H7C5J5  
**Gene Names:** GNB4  
**Peptide Sequence:** TFVSGACDASSK  
**Total Number of Spectra:** 1  
**Number of Replicates (out of 8):** 1  
**Best Match Score:** 97.463  
**Best Match Posterior Error Probability:** 0.00068072  
**Best Match Spectrum:**

**Scan number** 10853      **Raw file** A549-US-WT-top20CID-Elite-2ug-B11  
**Method** ITMS; CID      **Genenames** GNB4

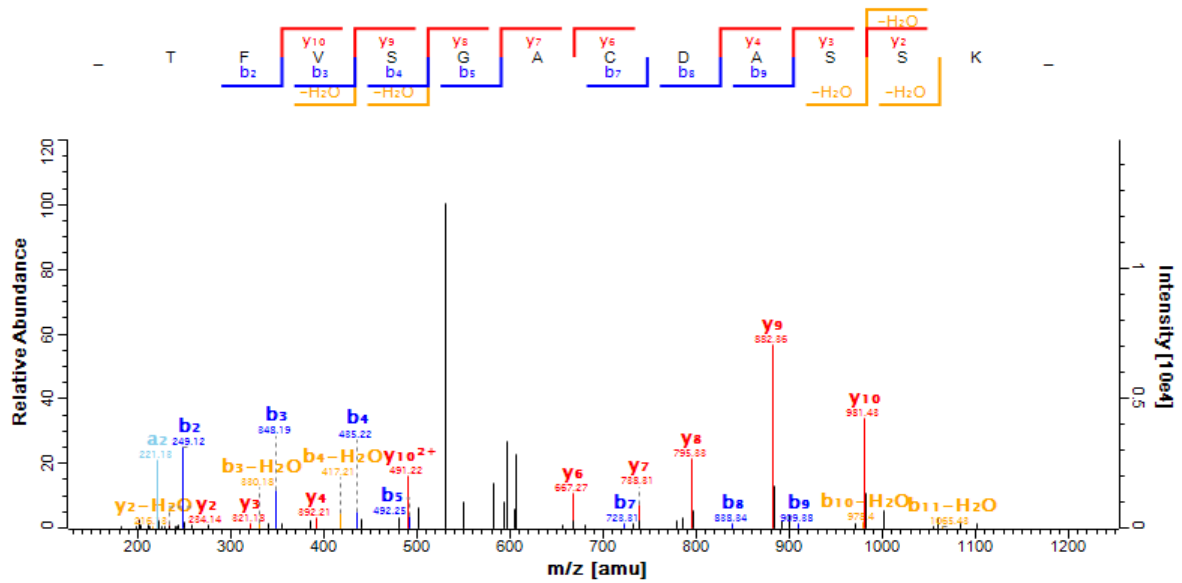

**Protein Group ID:** 4808

**Protein Accession Numbers:** Q9HAW7; Q9HAW9; Q9HAW8; Q7Z6H8

**Gene Names:** UGT1A7;UGT1A8;UGT1A10

**Peptide Sequence:** LLVVPMDGSHWFTMQSVVEK

**Total Number of Spectra:** 2

**Number of Replicates (out of 8):** 2

**Best Match Score:** 80.545

**Best Match Posterior Error Probability:** 0.00051372

**Best Match Spectrum:**

**Scan number** 76330      **Raw file** A549-US-Mock-top20CID-Elite-2ug-B14  
**Method** ITMS; CID      **Genenames** UGT1A7;UGT1A8;UGT1A10

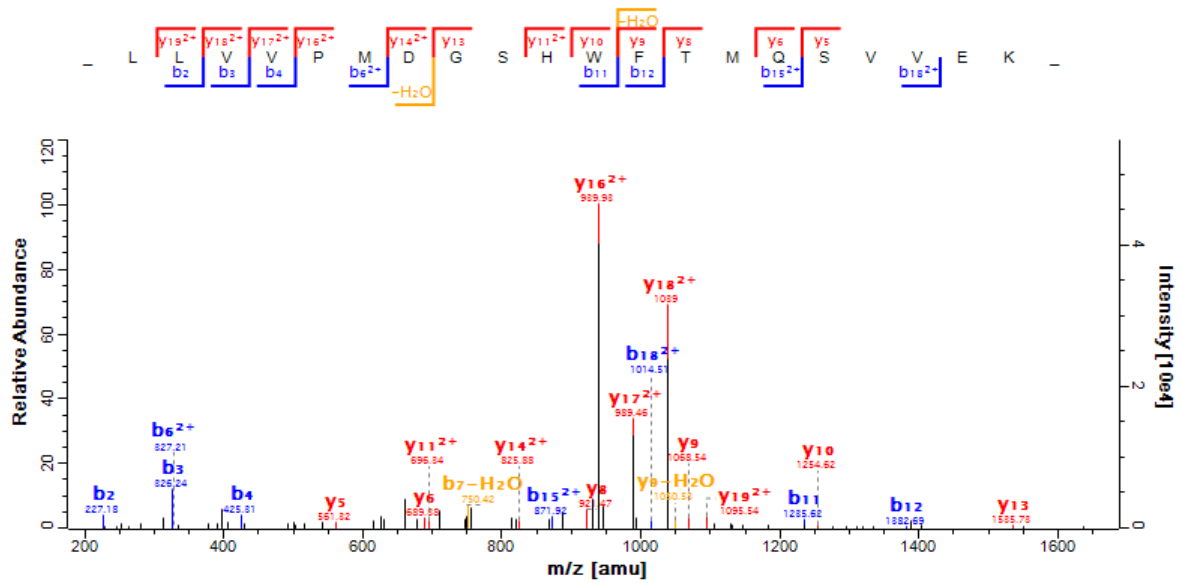

**Protein Group ID:** 4823  
**Protein Accession Numbers:** Q9HCK8; Q9HCK8-2  
**Gene Names:** CHD8  
**Peptide Sequence:** VVLQPQAGSSQGASSGLSVVK  
**Total Number of Spectra:** 1  
**Number of Replicates (out of 8):** 1  
**Best Match Score:** 79.293  
**Best Match Posterior Error Probability:** 0.00034031  
**Best Match Spectrum:**

**Scan number** 37172      **Raw file** A549-US-Mock-top20CID-Elite-2ug-B14  
**Method** ITMS; CID      **Genenames** CHD8

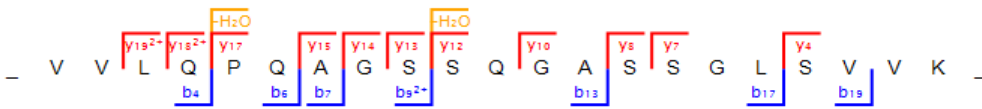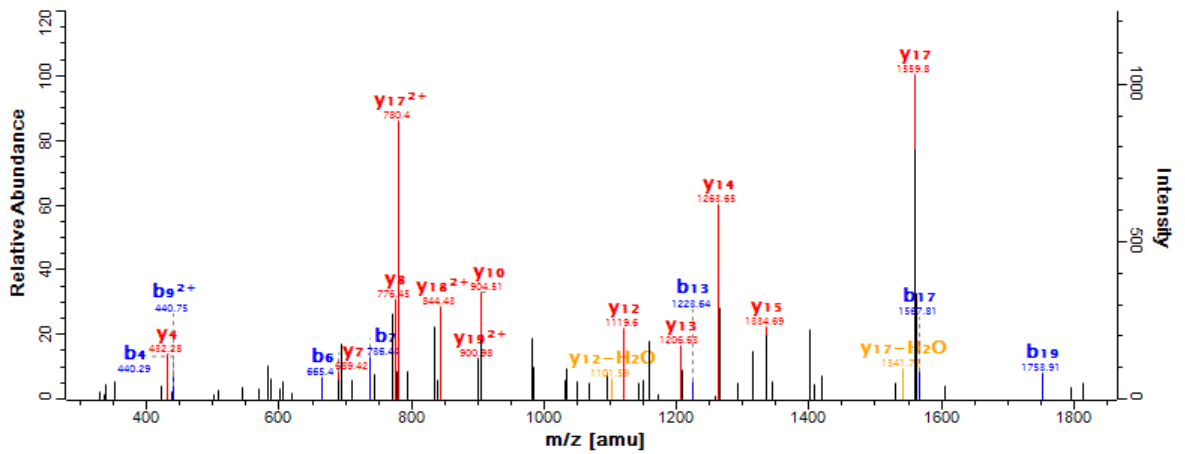



**Protein Group ID:** 4843  
**Protein Accession Numbers:** Q9NPH0; Q9NPH0-2  
**Gene Names:** ACP6  
**Peptide Sequence:** GGMFAGQLTK  
**Total Number of Spectra:** 2  
**Number of Replicates (out of 8):** 2  
**Best Match Score:** 91.658  
**Best Match Posterior Error Probability:** 0.0017649  
**Best Match Spectrum:**

**Scan number** 28928      **Raw file** A549-US-Mock-top20CID-Elite-2ug-B12  
**Method** ITMS; CID      **Genenames** ACP6

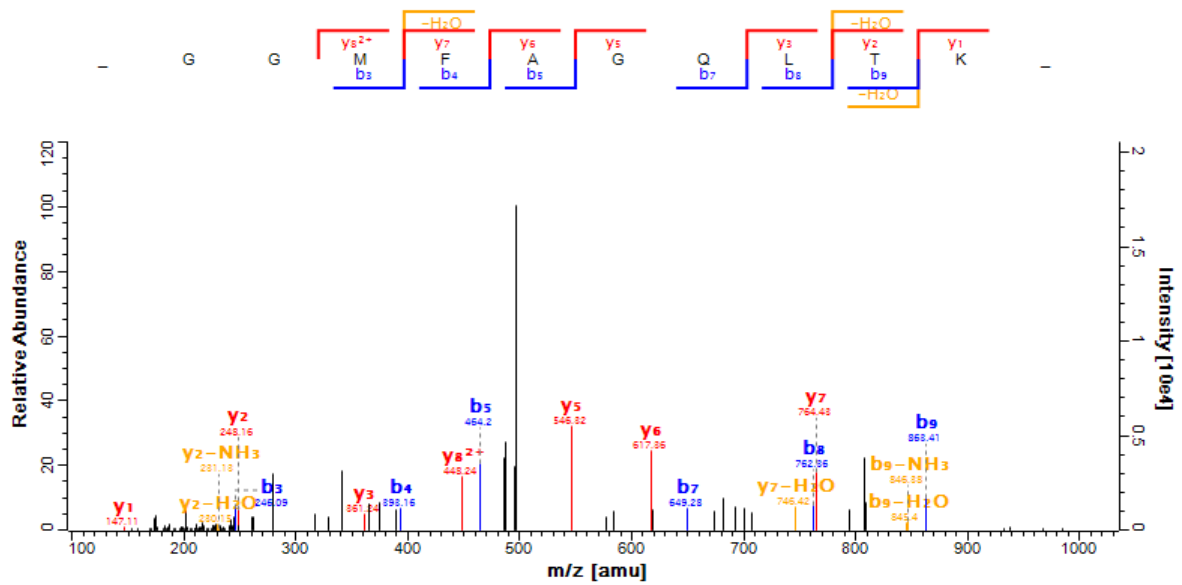

**Protein Group ID:** 4844  
**Protein Accession Numbers:** Q9NPI5  
**Gene Names:** ITGB1BP3  
**Peptide Sequence:** LIVIGGMTNGK  
**Total Number of Spectra:** 1  
**Number of Replicates (out of 8):** 1  
**Best Match Score:** 102.53  
**Best Match Posterior Error Probability:** 0.000463  
**Best Match Spectrum:**

**Scan number** 17779      **Raw file** A549-US-WT-top20CID-Elite-2ug-B11  
**Method** ITMS; CID      **Genenames** ITGB1BP3

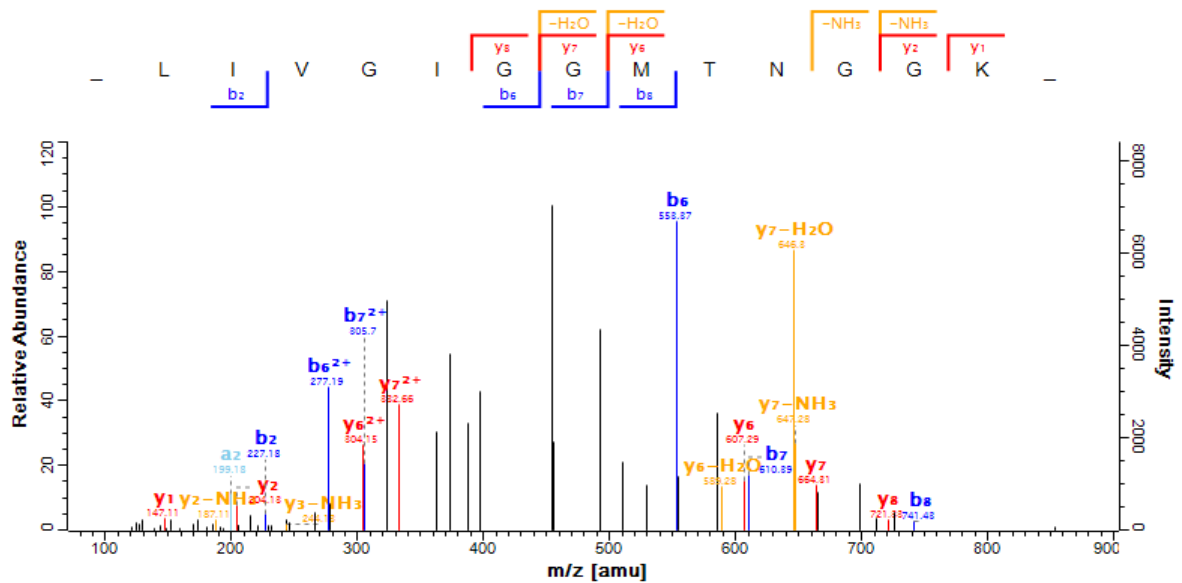

**Protein Group ID:** 4852  
**Protein Accession Numbers:** Q9NQE9  
**Gene Names:** HINT3  
**Peptide Sequence:** PAATHHYLVVPK  
**Total Number of Spectra:** 3  
**Number of Replicates (out of 8):** 3  
**Best Match Score:** 141.88  
**Best Match Posterior Error Probability:** 3.33E-05  
**Best Match Spectrum:**

**Scan number** 17014      **Raw file** A549-US-WT-top20CID-Elite-2ug-B11  
**Method** ITMS; CID      **Genenames** HINT3

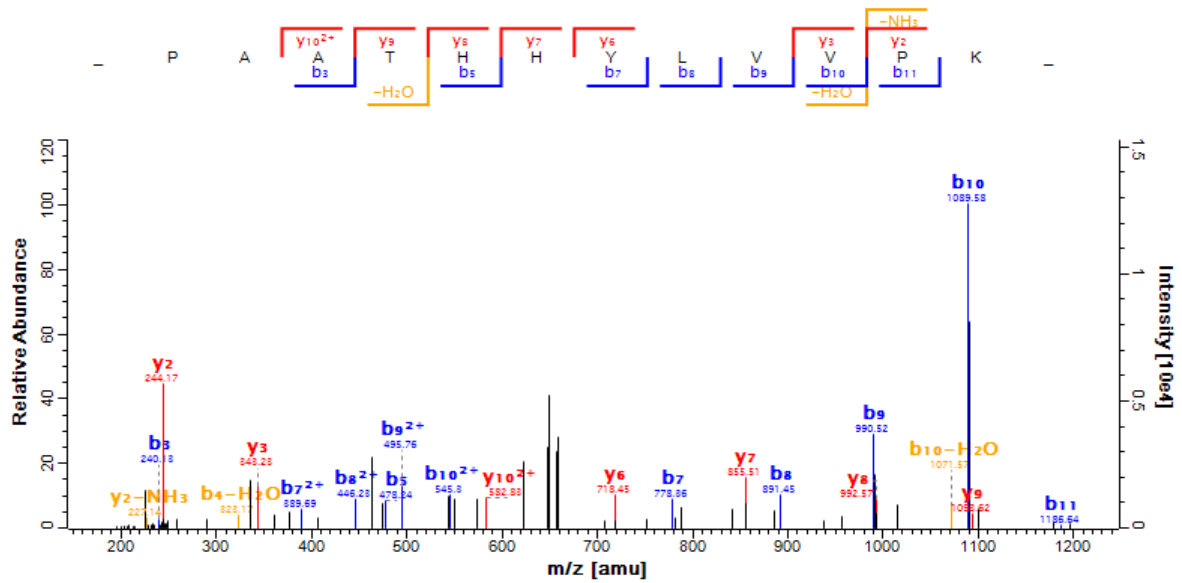

**Protein Group ID:** 4857  
**Protein Accession Numbers:** Q9NQS7; Q9NQS7-2  
**Gene Names:** INCENP  
**Peptide Sequence:** PAASSPETPSAGQEQEAK  
**Total Number of Spectra:** 6  
**Number of Replicates (out of 8):** 5  
**Best Match Score:** 130.01  
**Best Match Posterior Error Probability:** 9.19E-05  
**Best Match Spectrum:**

**Scan number** 6737      **Raw file** A549-US-Mock-top20CID-Elite-2ug-B11  
**Method** ITMS; CID      **Genenames** INCENP

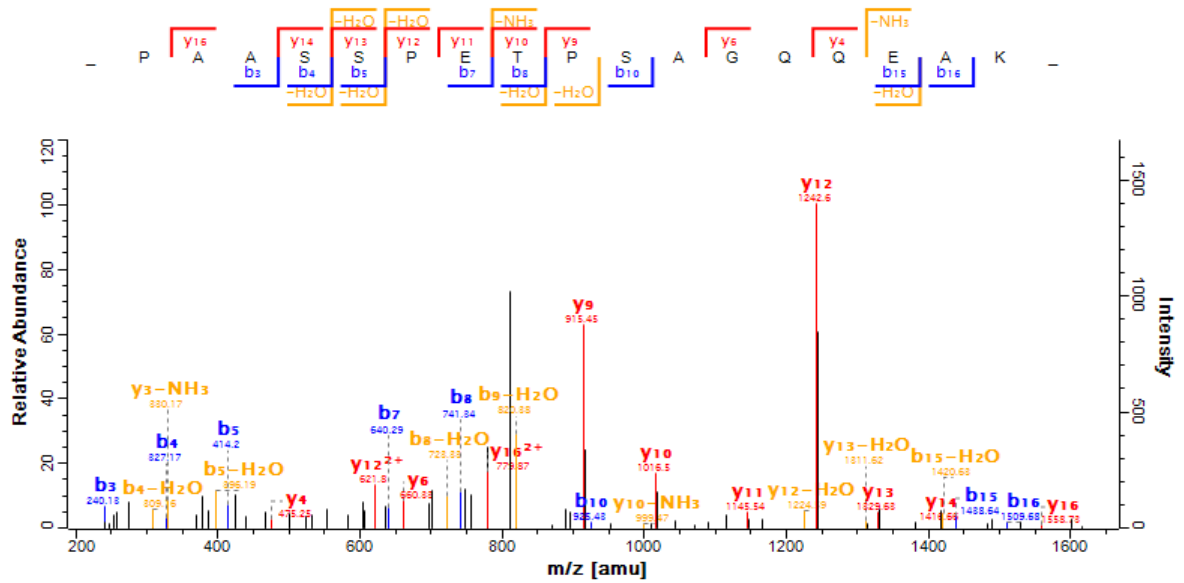

**Protein Group ID:** 4865  
**Protein Accession Numbers:** Q9NR22; Q9NR22-2  
**Gene Names:** PRMT8  
**Peptide Sequence:** VVLDVGS GTGILSMFAAK  
**Total Number of Spectra:** 11  
**Number of Replicates (out of 8):** 6  
**Best Match Score:** 188.44  
**Best Match Posterior Error Probability:** 9.91E-22  
**Best Match Spectrum:**

**Scan number** 82692      **Raw file** A549-US-Mock-top20CID-Elite-2ug-B13  
**Method** ITMS; CID      **Genenames** PRMT8

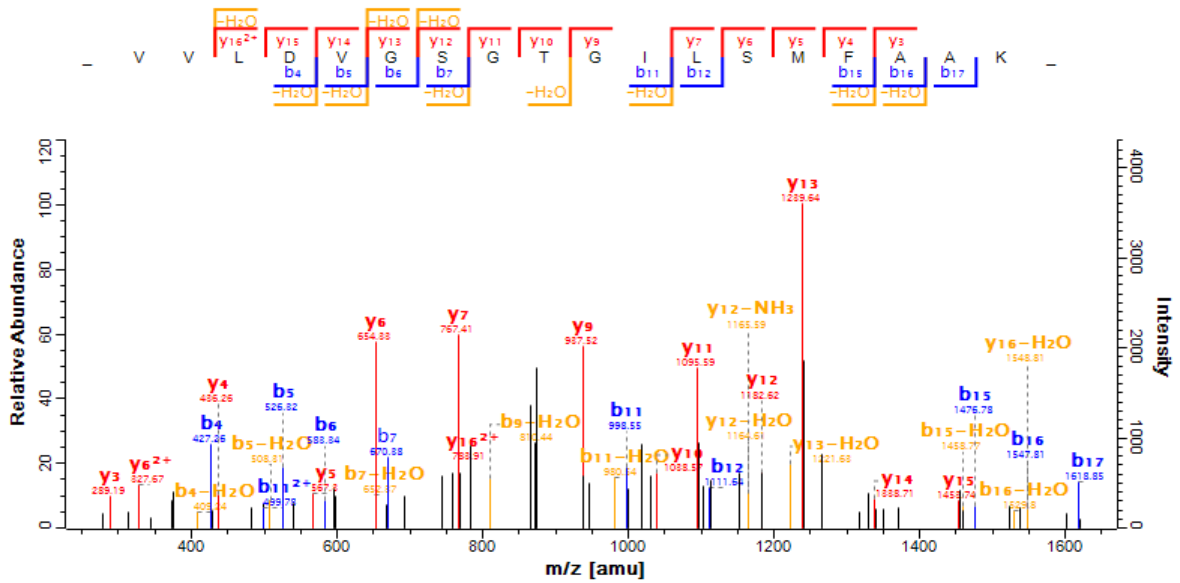

**Protein Group ID:** 4873  
**Protein Accession Numbers:** Q9NRD1  
**Gene Names:** FBXO6  
**Peptide Sequence:** AALDSINELP E N I L L E L F T H V P A R  
**Total Number of Spectra:** 2  
**Number of Replicates (out of 8):** 2  
**Best Match Score:** 61.087  
**Best Match Posterior Error Probability:** 0.0018476  
**Best Match Spectrum:**

|                    |           |                  |                                   |
|--------------------|-----------|------------------|-----------------------------------|
| <b>Scan number</b> | 96143     | <b>Raw file</b>  | A549-US-WT-top20CID-Elite-2ug-B11 |
| <b>Method</b>      | ITMS; CID | <b>Genenames</b> | FBXO6                             |

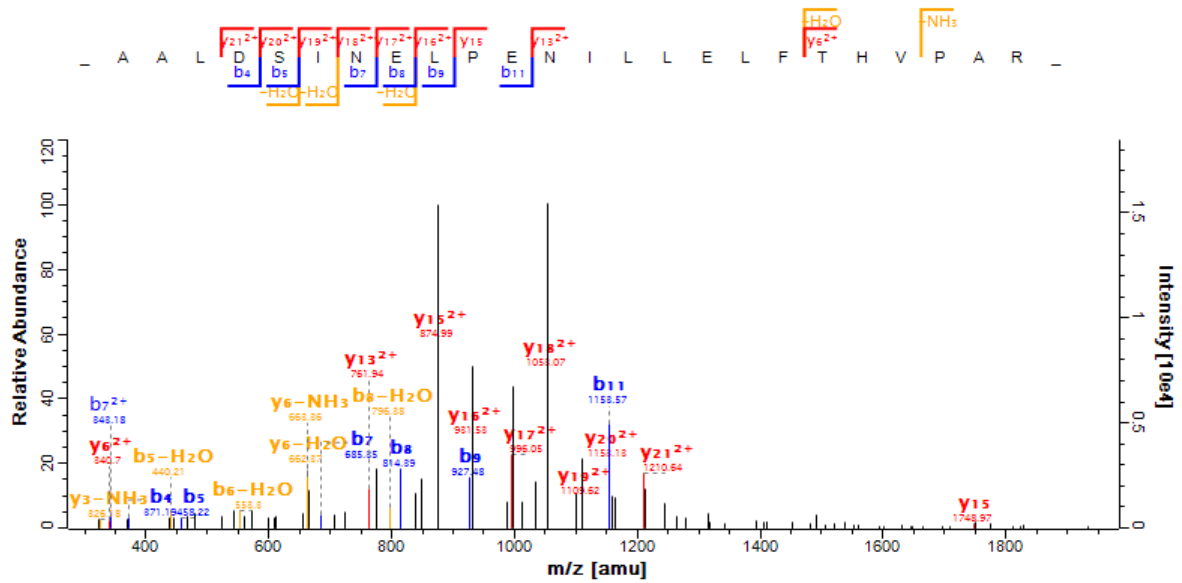

**Protein Group ID:** 4876  
**Protein Accession Numbers:** Q9NRG7; Q9NRG7-2  
**Gene Names:** SDR39U1  
**Peptide Sequence:** LETTQLLAK  
**Total Number of Spectra:** 2  
**Number of Replicates (out of 8):** 2  
**Best Match Score:** 89.827  
**Best Match Posterior Error Probability:** 0.0036541  
**Best Match Spectrum:**

**Scan number** 28996      **Raw file** A549-US-WT-top20CID-Elite-2ug-B12  
**Method** ITMS; CID      **Genenames** SDR39U1

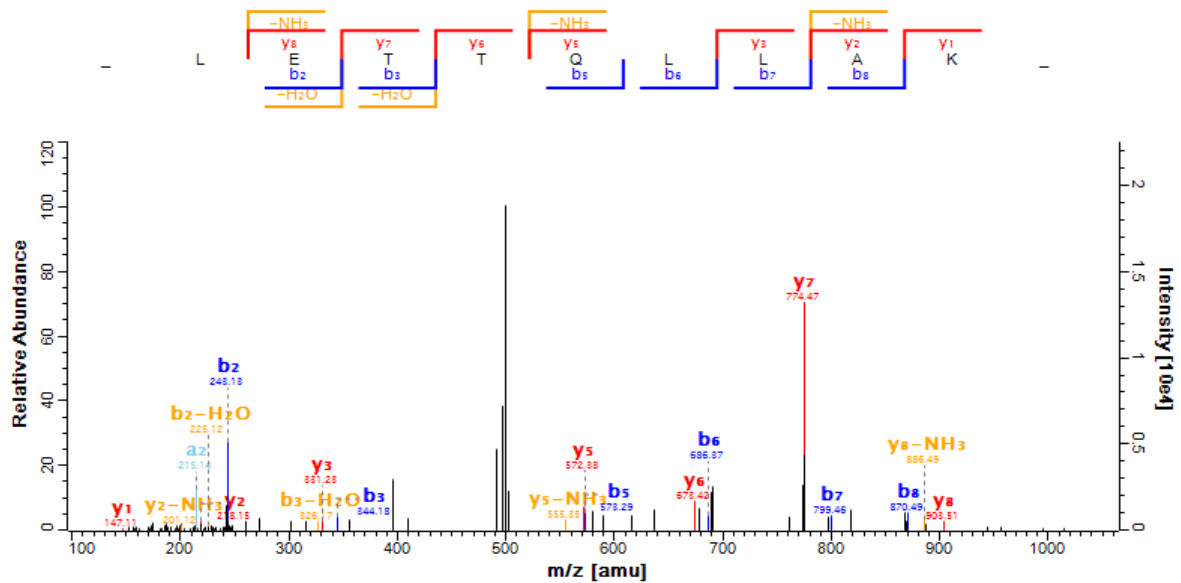

**Protein Group ID:** 4883

**Protein Accession Numbers:** Q9NRR8

**Gene Names:** CDC42SE1

**Peptide Sequence:** TMIGEPMNFVHLTHIGSGEMGAGDGLAMTGA VQE QMR

**Total Number of Spectra:** 1

**Number of Replicates (out of 8):** 1

**Best Match Score:** 42.571

**Best Match Posterior Error Probability:** 0.0022742

**Best Match Spectrum:**

|                    |           |                  |                                   |
|--------------------|-----------|------------------|-----------------------------------|
| <b>Scan number</b> | 75235     | <b>Raw file</b>  | A549-US-WT-top20CID-Elite-2ug-811 |
| <b>Method</b>      | ITMS; CID | <b>Genenames</b> | CDC42SE1                          |

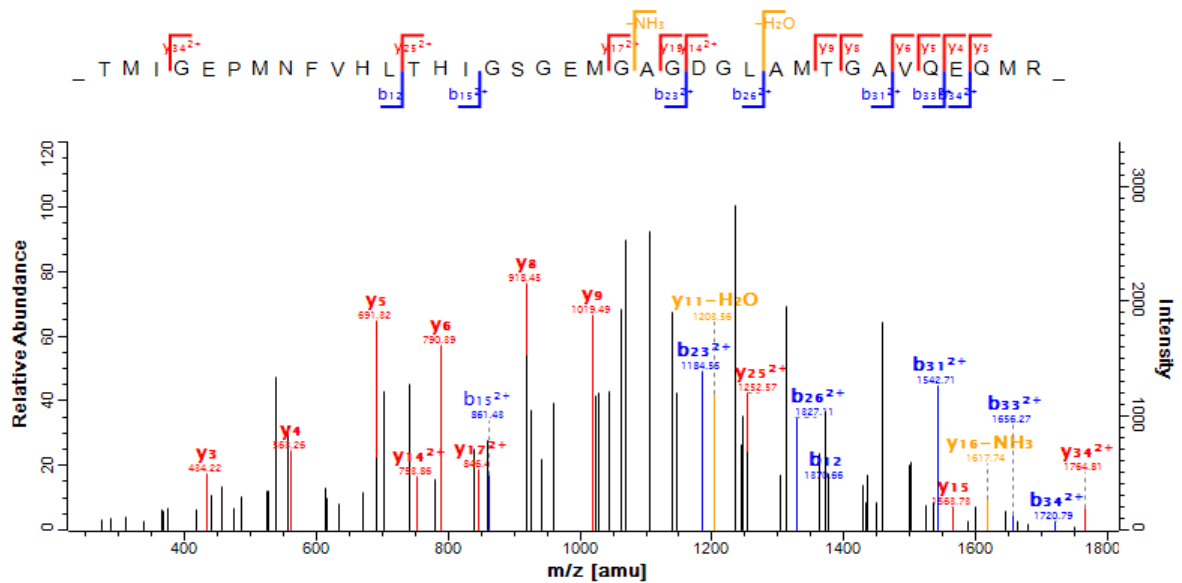



**Protein Group ID:** 4896

**Protein Accession Numbers:** Q9NS87; Q9NS87-4

**Gene Names:** KIF15

**Peptide Sequence:** TTFD<sup>13</sup>HVADVDTTQESVFA<sup>16</sup>TVAK

**Total Number of Spectra:** 1

**Number of Replicates (out of 8):** 1

**Best Match Score:** 87.352

**Best Match Posterior Error Probability:** 1.49E-05

**Best Match Spectrum:**

|                    |           |                  |                                     |
|--------------------|-----------|------------------|-------------------------------------|
| <b>Scan number</b> | 64814     | <b>Raw file</b>  | A549-US-Mock-top20CID-Elite-2ug-B14 |
| <b>Method</b>      | ITMS; CID | <b>Genenames</b> | KIF15                               |

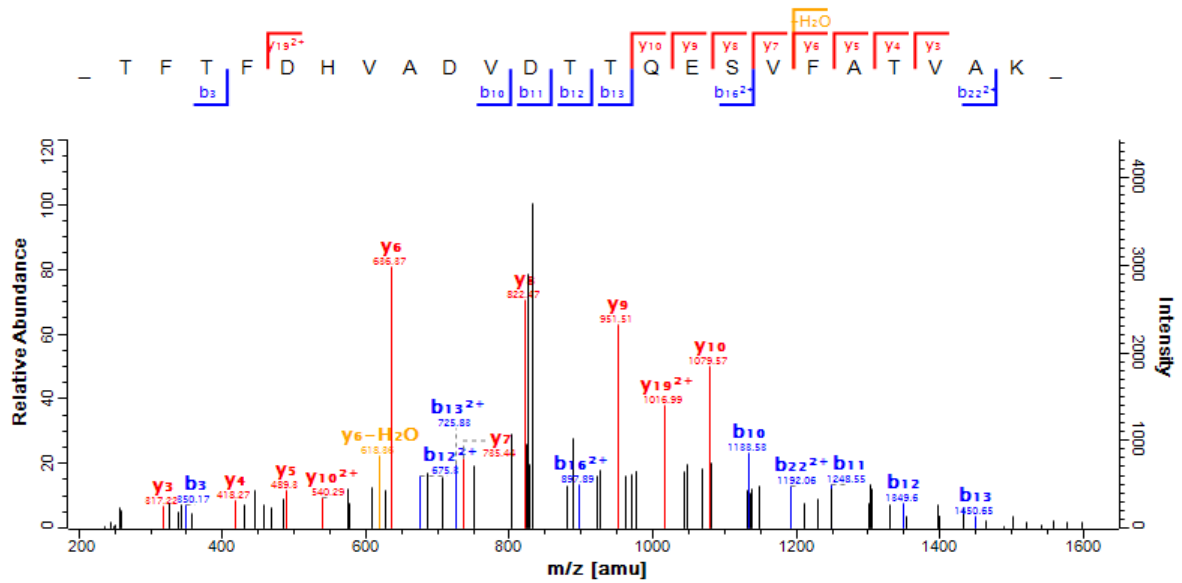

**Protein Group ID:** 4899

**Protein Accession Numbers:** Q9NSG2; Q9NSG2-2; Q9NSG2-3

**Gene Names:** Clorf112

**Peptide Sequence:** SALHTIAGLEATSESLQLK

**Total Number of Spectra:** 3

**Number of Replicates (out of 8):** 3

**Best Match Score:** 98.508

**Best Match Posterior Error Probability:** 0.00016345

**Best Match Spectrum:**

**Scan number** 81367      **Raw file** A549-US-Mock-top20CID-Elite-2ug-B11  
**Method** ITMS; CID      **Genenames** Clorf112

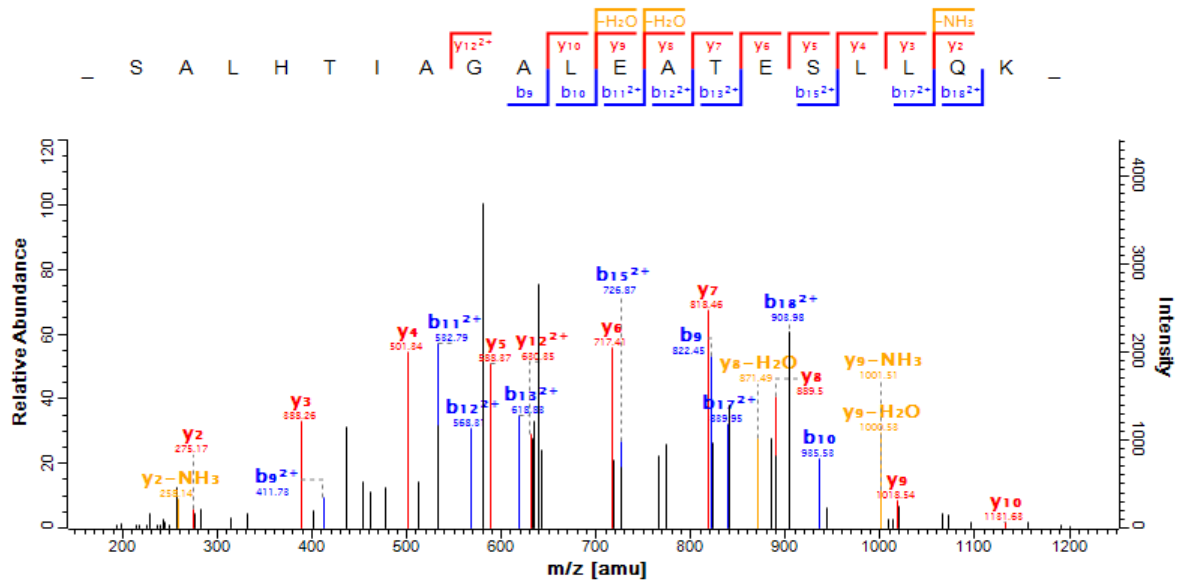

**Protein Group ID:** 4909  
**Protein Accession Numbers:** Q9NUG6  
**Gene Names:** PDRG1  
**Peptide Sequence:** LFEAQGKPELK  
**Total Number of Spectra:** 5  
**Number of Replicates (out of 8):** 5  
**Best Match Score:** 123.67  
**Best Match Posterior Error Probability:** 0.00020036  
**Best Match Spectrum:**

**Scan number** 22865      **Raw file** A549-US-WT-top20CID-Elite-2ug-B14  
**Method** ITMS; CID      **Genenames** PDRG1

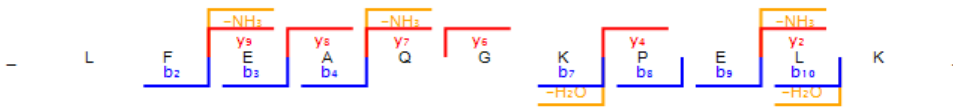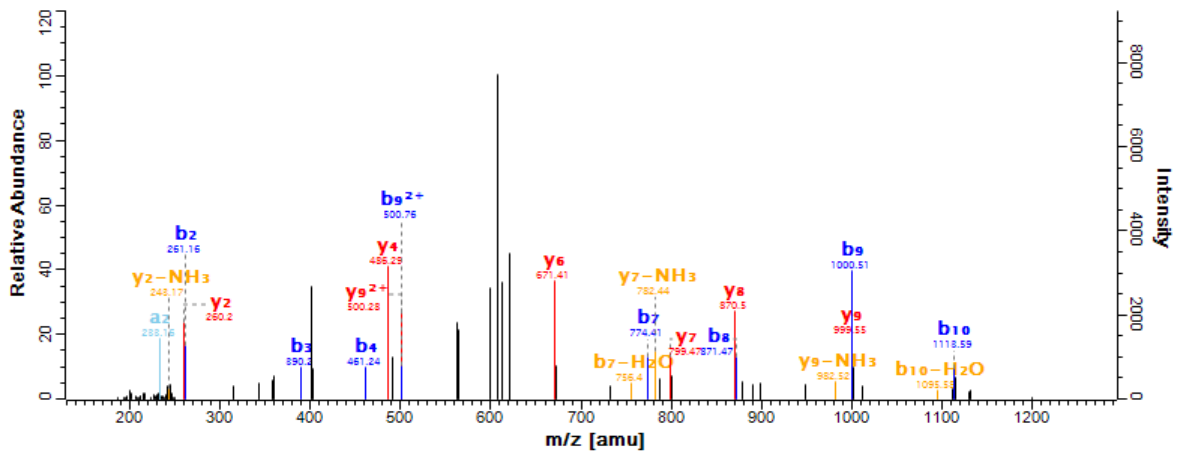

**Protein Group ID:** 4912  
**Protein Accession Numbers:** Q9NUP7  
**Gene Names:** CCDC76  
**Peptide Sequence:** RQDNQNDDSEEHDDGGYR  
**Total Number of Spectra:** 1  
**Number of Replicates (out of 8):** 1  
**Best Match Score:** 102.08  
**Best Match Posterior Error Probability:** 0.00034075  
**Best Match Spectrum:**

**Scan number** 2744      **Raw file** A549-US-WT-top20CID-Elite-2ug-B14  
**Method** ITMS; CID      **Genenames** CCDC76

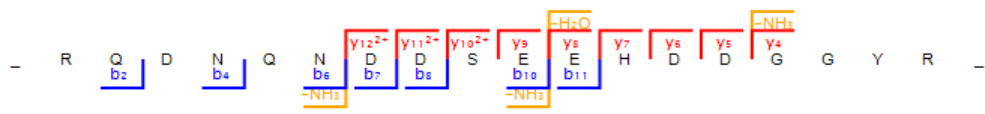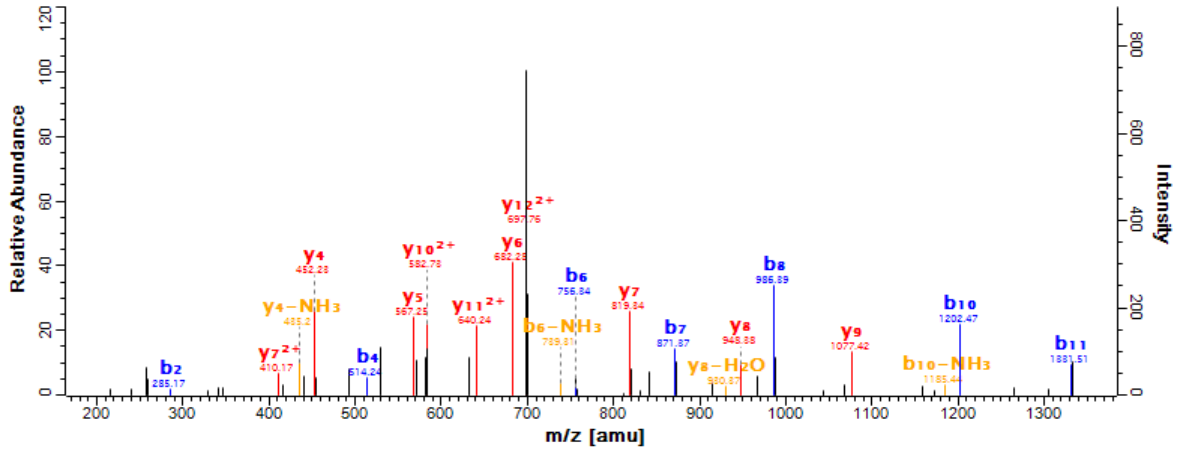

**Protein Group ID:** 4920  
**Protein Accession Numbers:** Q9NV31  
**Gene Names:** IMP3  
**Peptide Sequence:** VGPDVVTDPAFLVTR  
**Total Number of Spectra:** 2  
**Number of Replicates (out of 8):** 2  
**Best Match Score:** 162.41  
**Best Match Posterior Error Probability:** 1.05E-09  
**Best Match Spectrum:**

**Scan number** 59685      **Raw file** A549-US-Mock-top20CID-Elite-2ug-B14  
**Method** ITMS; CID      **Genenames** IMP3

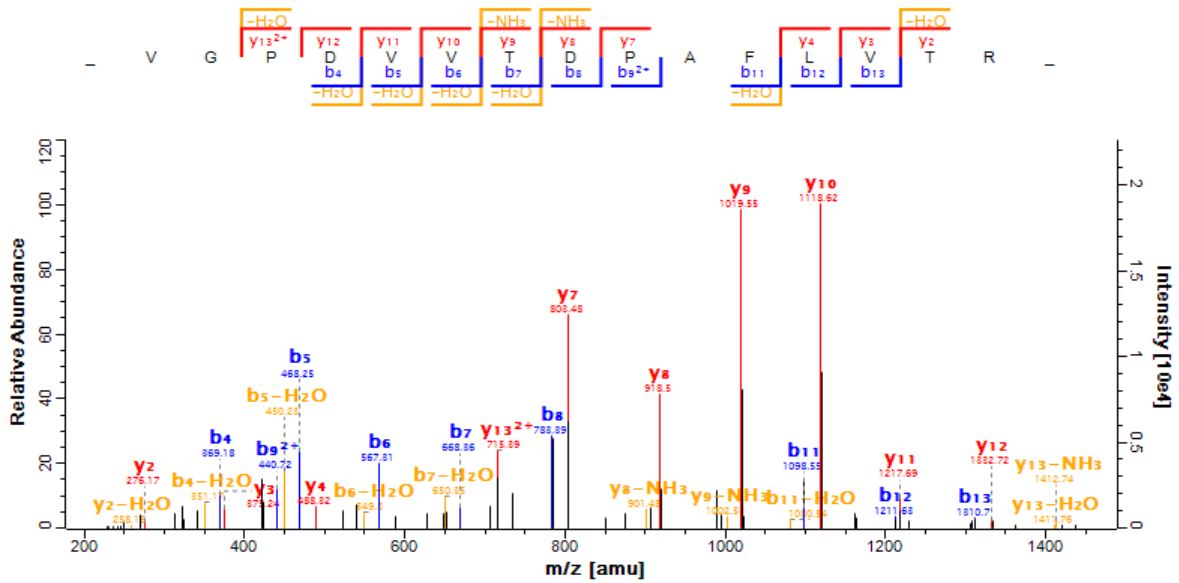

**Protein Group ID:** 4921  
**Protein Accession Numbers:** Q9NV35  
**Gene Names:** NUDT15  
**Peptide Sequence:** GEVDVTHDSEPK  
**Total Number of Spectra:** 1  
**Number of Replicates (out of 8):** 1  
**Best Match Score:** 120.57  
**Best Match Posterior Error Probability:** 0.00012349  
**Best Match Spectrum:**

**Scan number** 6552      **Raw file** A549-US-WT-top20CID-Elite-2ug-B11  
**Method** ITMS; CID      **Genenames** NUDT15

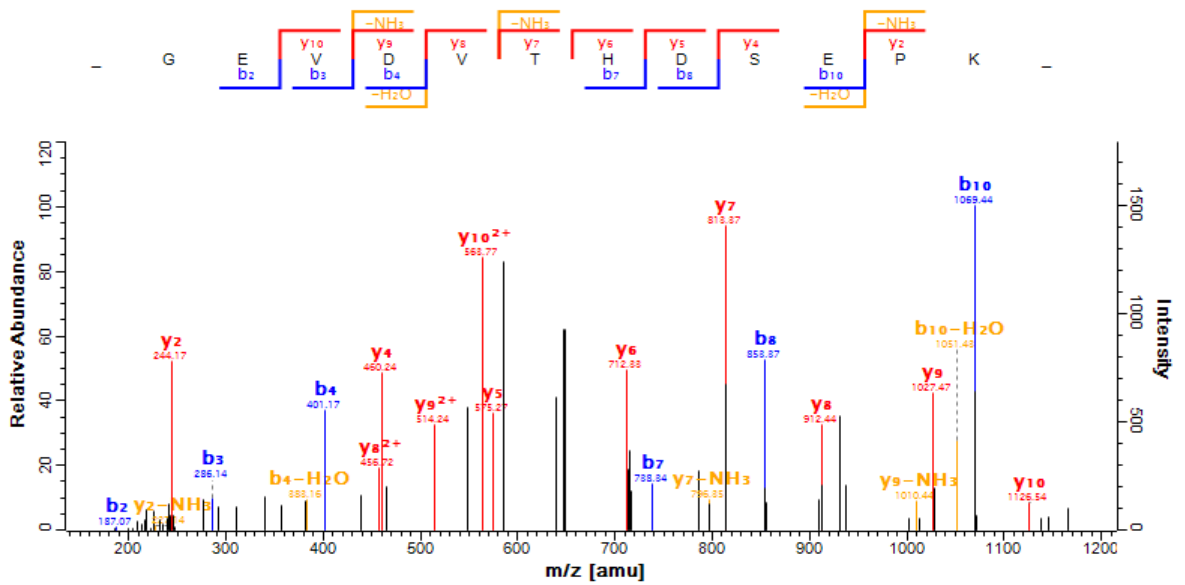

**Protein Group ID:** 4922  
**Protein Accession Numbers:** Q9NV56  
**Gene Names:** MRGBP  
**Peptide Sequence:** VLTANSNPSSPSAAK  
**Total Number of Spectra:** 3  
**Number of Replicates (out of 8):** 3  
**Best Match Score:** 105.46  
**Best Match Posterior Error Probability:** 0.00016325  
**Best Match Spectrum:**

**Scan number** 9540      **Raw file** A549-US-Mock-top20CID-Elite-2ug-B13  
**Method** ITMS; CID      **Genenames** MRGBP

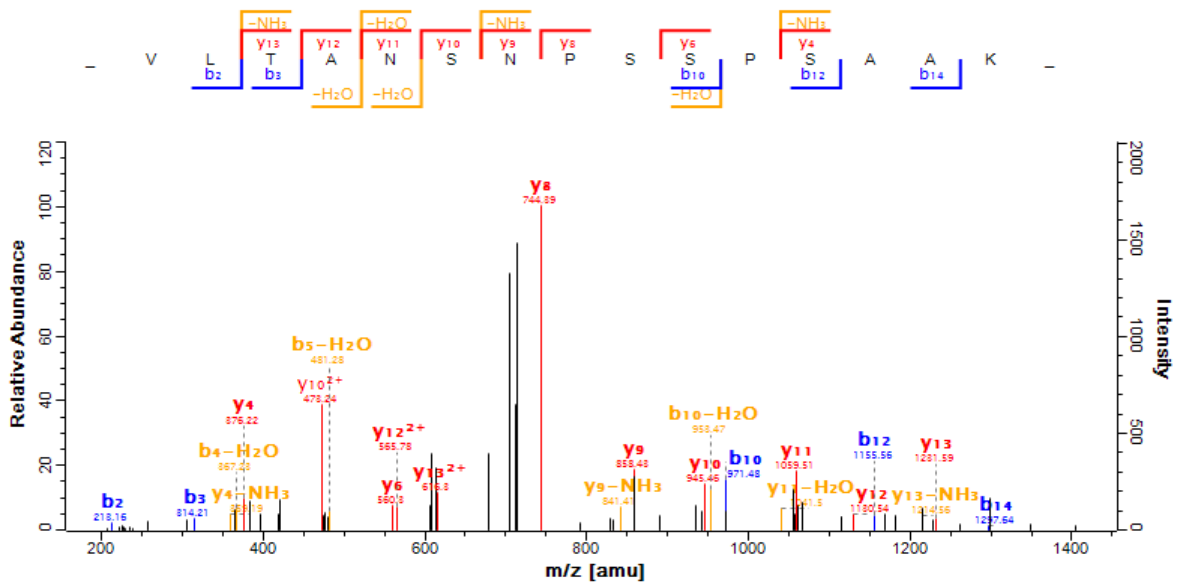

**Protein Group ID:** 4924  
**Protein Accession Numbers:** Q9NV96  
**Gene Names:** TMEM30A  
**Peptide Sequence:** EIEIDYTGTEPSSPCNK  
**Total Number of Spectra:** 1  
**Number of Replicates (out of 8):** 1  
**Best Match Score:** 141.86  
**Best Match Posterior Error Probability:** 2.50E-05  
**Best Match Spectrum:**

**Scan number** 34476      **Raw file** A549-US-Mock-top20CID-Elite-2ug-B13  
**Method** ITMS; CID      **Genenames** TMEM30A

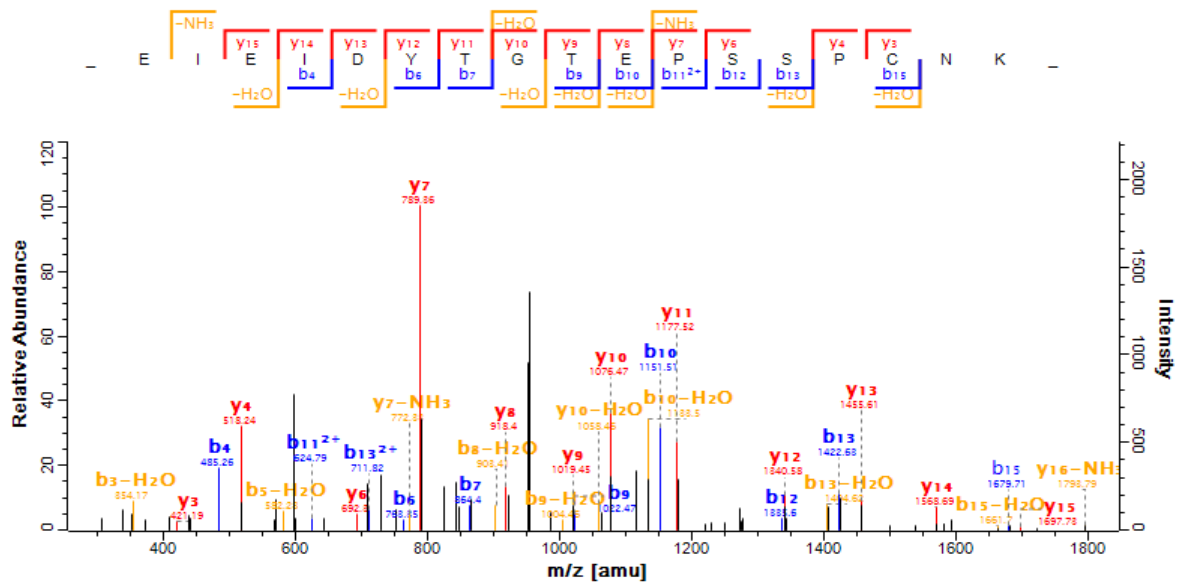



**Protein Group ID:** 4925  
**Protein Accession Numbers:** Q9NVC6  
**Gene Names:** MED17  
**Peptide Sequence:** NEINSLQSSEGLLEK  
**Total Number of Spectra:** 1  
**Number of Replicates (out of 8):** 1  
**Best Match Score:** 122.75  
**Best Match Posterior Error Probability:** 0.00014665  
**Best Match Spectrum:**

|                    |           |                  |                                   |
|--------------------|-----------|------------------|-----------------------------------|
| <b>Scan number</b> | 45018     | <b>Raw file</b>  | A549-US-WT-top20CID-Elite-2ug-B12 |
| <b>Method</b>      | ITMS; CID | <b>Genenames</b> | MED17                             |

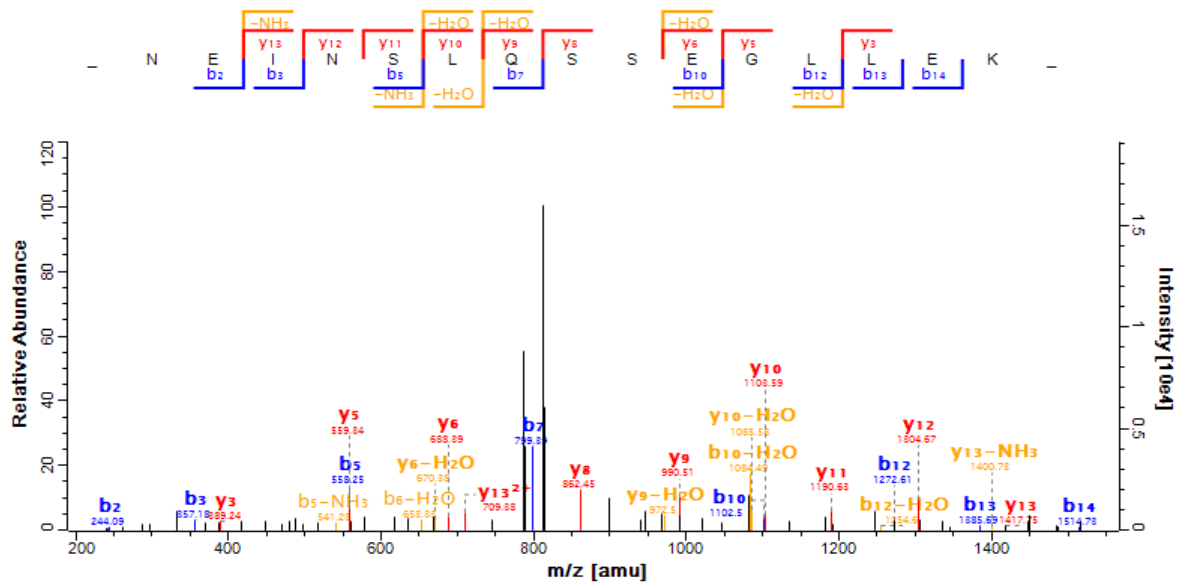

**Protein Group ID:** 4930  
**Protein Accession Numbers:** Q9NVJ2  
**Gene Names:** ARL8B  
**Peptide Sequence:** IEASRNELHNLNLLDKPQLQGIPVLVGLGNK  
**Total Number of Spectra:** 1  
**Number of Replicates (out of 8):** 1  
**Best Match Score:** 97.509  
**Best Match Posterior Error Probability:** 2.29E-05  
**Best Match Spectrum:**

**Scan number** 70069      **Raw file** A549-US-Mock-top20CID-Elite-2ug-B12  
**Method** ITMS; CID      **Genenames** ARL8B

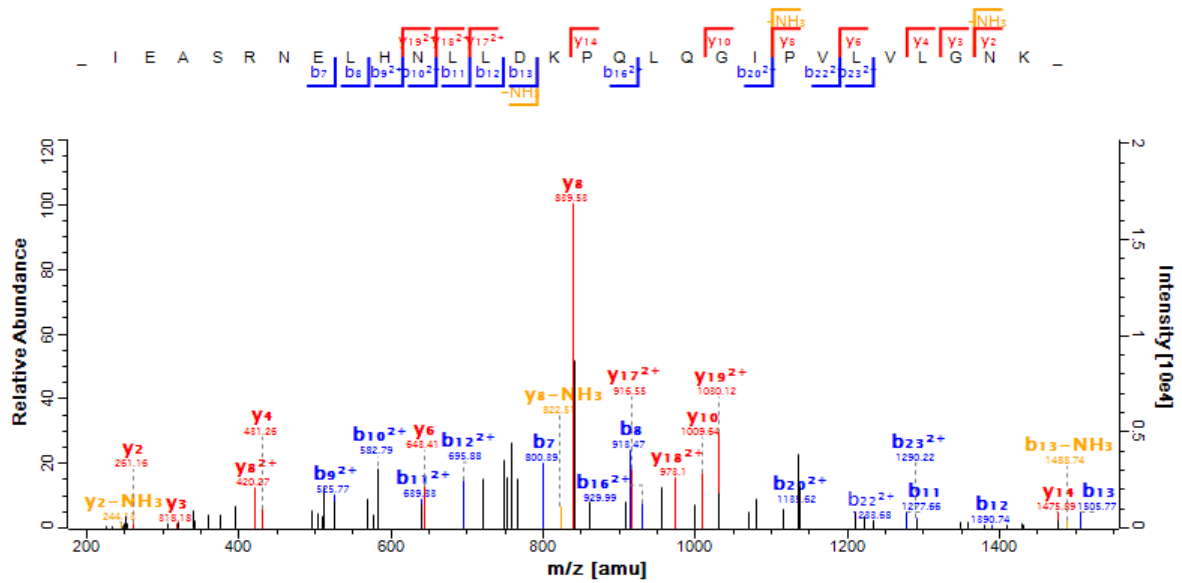

**Protein Group ID:** 4938

**Protein Accession Numbers:** Q9NVX0; Q9NVX0-3; Q9NVX0-2

**Gene Names:** HAUS2

**Peptide Sequence:** ILAEESYLYK

**Total Number of Spectra:** 1

**Number of Replicates (out of 8):** 1

**Best Match Score:** 92.538

**Best Match Posterior Error Probability:** 0.0016515

**Best Match Spectrum:**

**Scan number** 36812      **Raw file** A549-US-Mock-top20CID-Elite-2ug-B11  
**Method** ITMS; CID      **Genenames** HAUS2

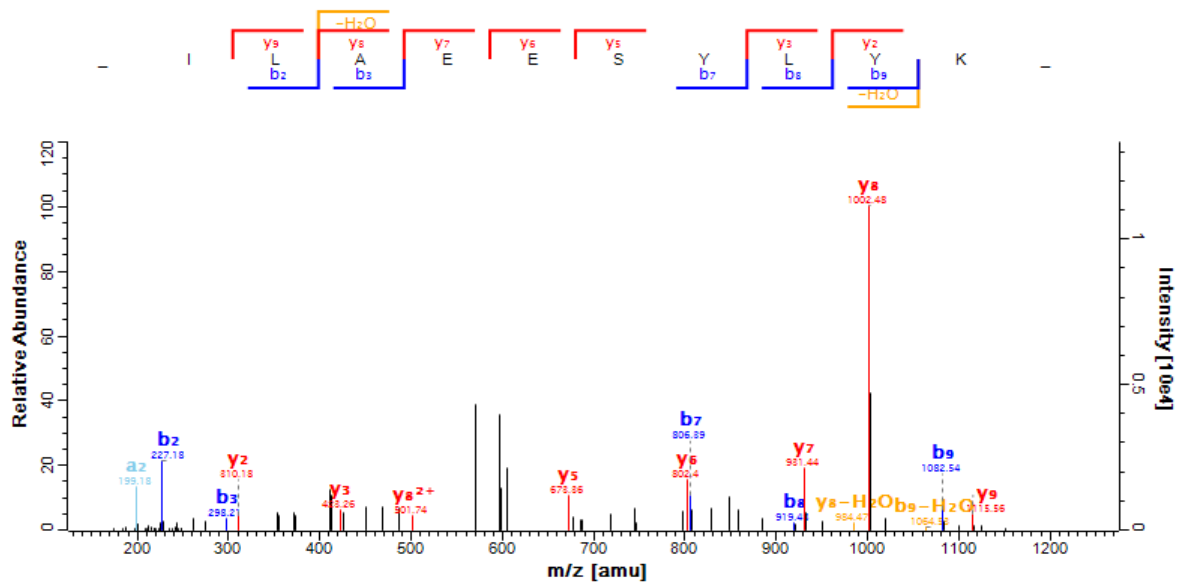

**Protein Group ID:** 4943  
**Protein Accession Numbers:** Q9NWA0  
**Gene Names:** MED9  
**Peptide Sequence:** LISTMPGIHLSPEQQQQQLQLSLR  
**Total Number of Spectra:** 3  
**Number of Replicates (out of 8):** 3  
**Best Match Score:** 82.8  
**Best Match Posterior Error Probability:** 7.09E-05  
**Best Match Spectrum:**

**Scan number** 53973      **Raw file** A549-US-Mock-top20CID-Elite-2ug-B11  
**Method** ITMS; CID      **Genenames** MED9

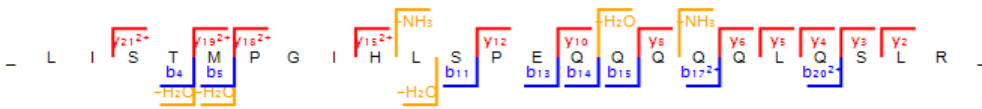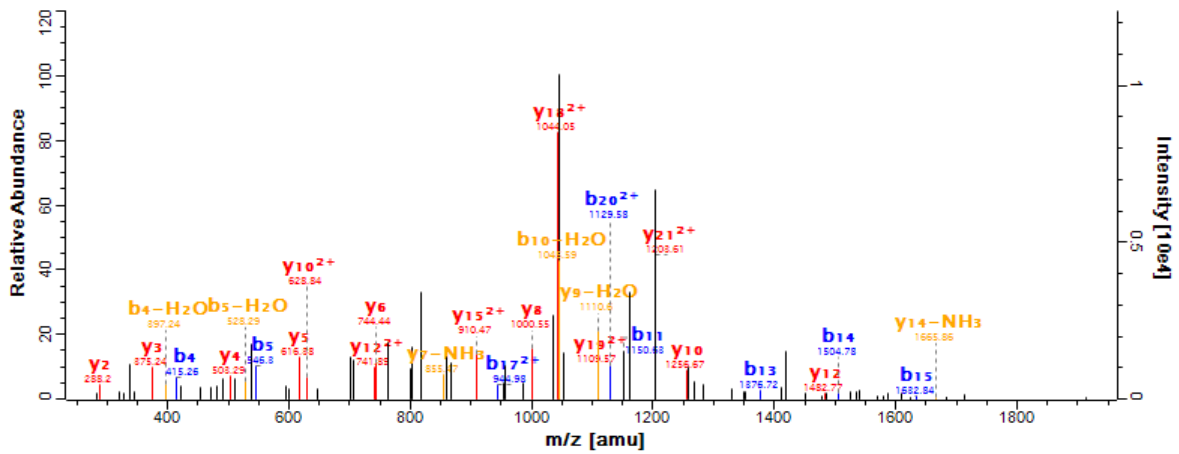

**Protein Group ID:** 4946  
**Protein Accession Numbers:** Q9NWT1  
**Gene Names:** PAK1IP1  
**Peptide Sequence:** LTCLGVWLDK  
**Total Number of Spectra:** 4  
**Number of Replicates (out of 8):** 4  
**Best Match Score:** 137.89  
**Best Match Posterior Error Probability:** 1.06E-05  
**Best Match Spectrum:**

**Scan number** 57527      **Raw file** A549-US-WT-top20CID-Elite-2ug-B11  
**Method** ITMS; CID      **Genenames** PAK1IP1

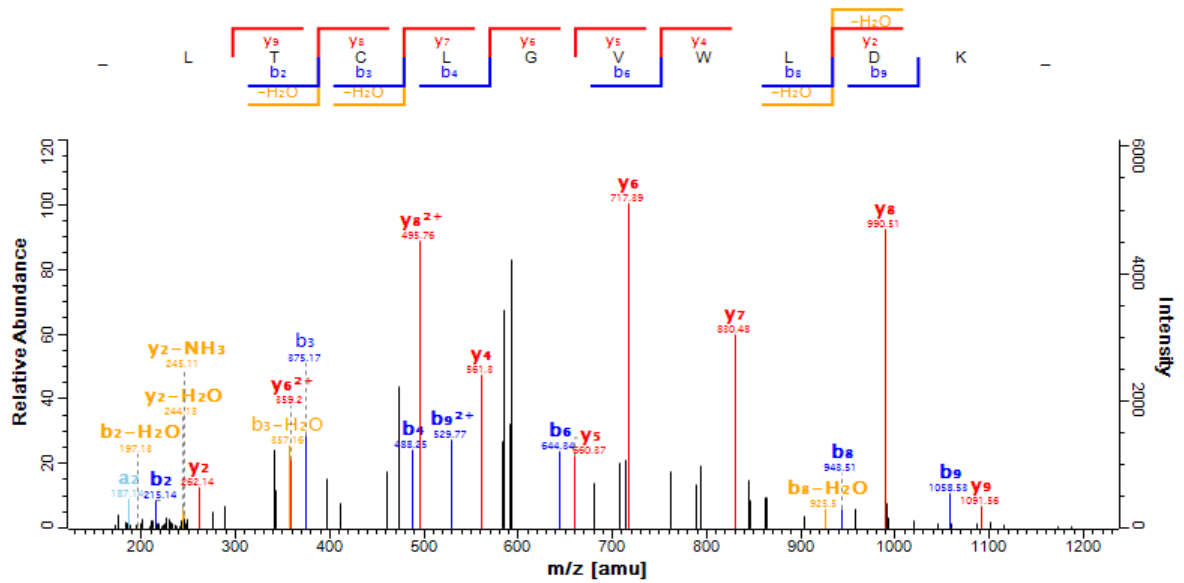

**Protein Group ID:** 4953  
**Protein Accession Numbers:** Q9NWZ3; Q9NWZ3-2  
**Gene Names:** IRAK4  
**Peptide Sequence:** GYVNNTTVAVK  
**Total Number of Spectra:** 1  
**Number of Replicates (out of 8):** 1  
**Best Match Score:** 98.898  
**Best Match Posterior Error Probability:** 0.00055555  
**Best Match Spectrum:**

**Scan number** 17819      **Raw file** A549-US-WT-top20CID-Elite-2ug-B12  
**Method** ITMS; CID      **Genenames** IRAK4

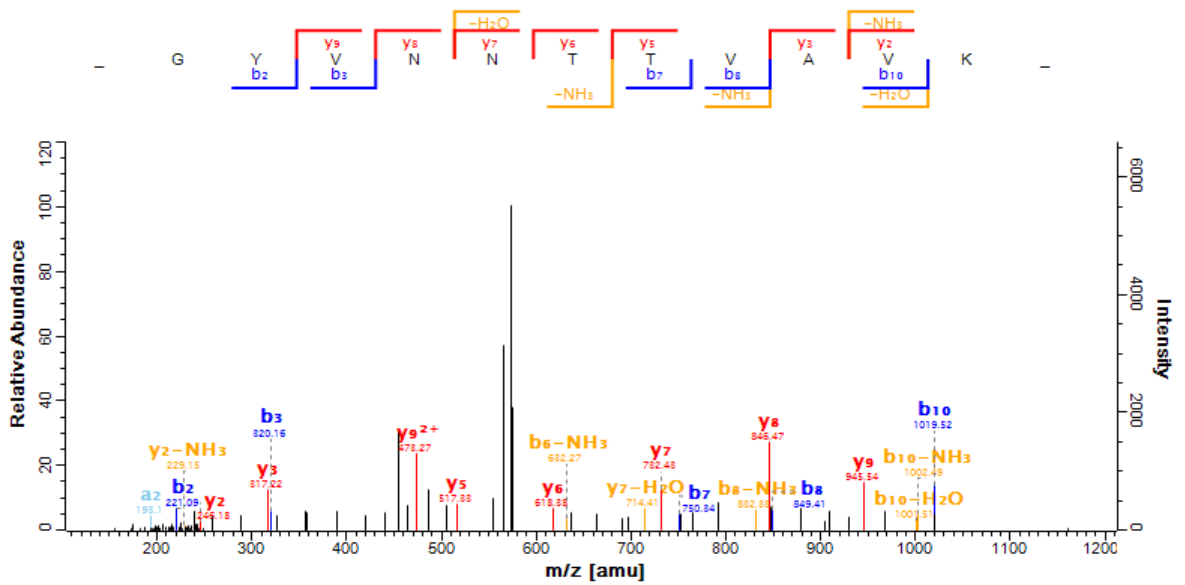

**Protein Group ID:** 4954  
**Protein Accession Numbers:** Q9NX01  
**Gene Names:** TXNL4B  
**Peptide Sequence:** TKQDFIDLIEVILYR  
**Total Number of Spectra:** 1  
**Number of Replicates (out of 8):** 1  
**Best Match Score:** 102.73  
**Best Match Posterior Error Probability:** 0.0013234  
**Best Match Spectrum:**

**Scan number** 83929      **Raw file** A549-US-WT-top20CID-Elite-2ug-B12  
**Method** ITMS; CID      **Genenames** TXNL4B

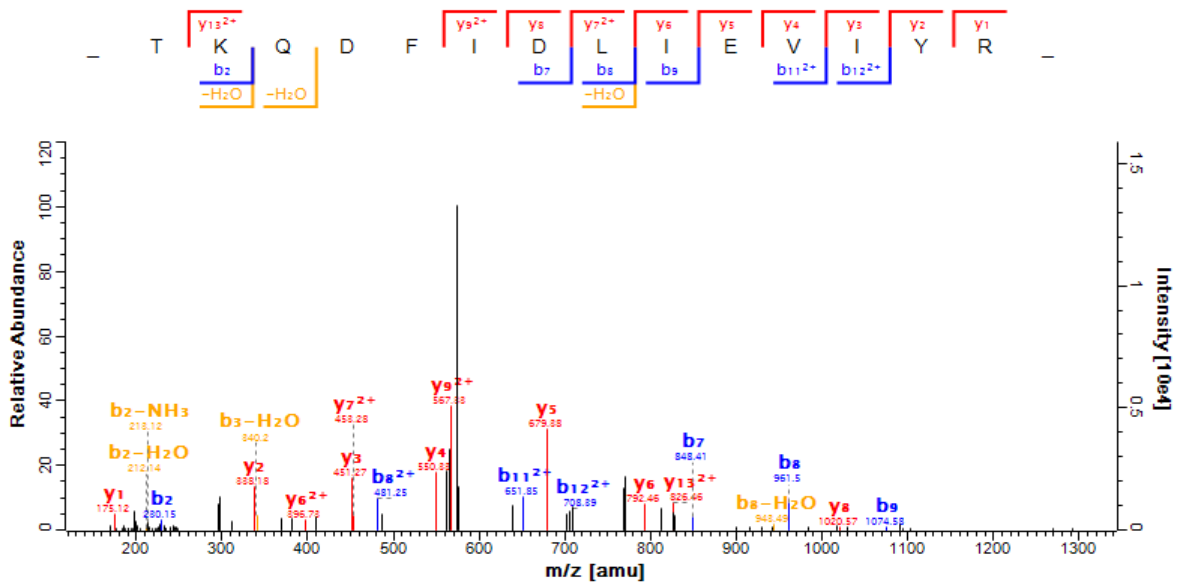

**Protein Group ID:** 4956  
**Protein Accession Numbers:** Q9NX08  
**Gene Names:** COMMD8  
**Peptide Sequence:** AYPVYQDYHTVWESEEWMLHVLEDIAK  
**Total Number of Spectra:** 1  
**Number of Replicates (out of 8):** 1  
**Best Match Score:** 54.235  
**Best Match Posterior Error Probability:** 0.0024923  
**Best Match Spectrum:**

**Scan number** 89125      **Raw file** A549-US-Mock-top20CID-Elite-2ug-B12  
**Method** ITMS; CID      **Genenames** COMMD8

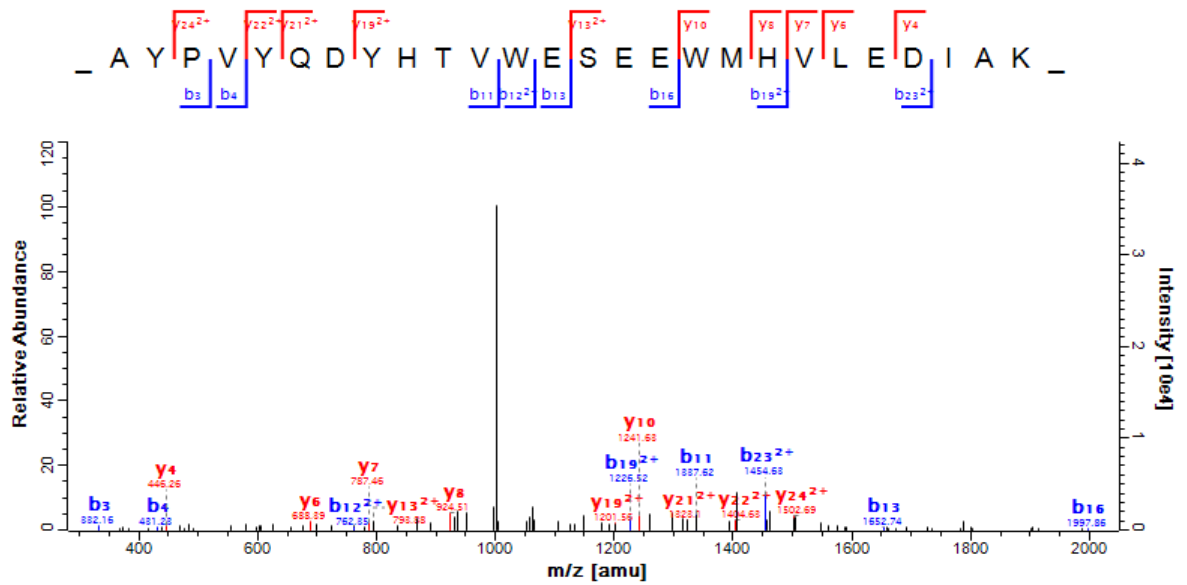



**Protein Group ID:** 4972  
**Protein Accession Numbers:** Q9NXX6  
**Gene Names:** NSMCE4A  
**Peptide Sequence:** TFEISEPVITPSQR  
**Total Number of Spectra:** 2  
**Number of Replicates (out of 8):** 2  
**Best Match Score:** 83.499  
**Best Match Posterior Error Probability:** 0.0023858  
**Best Match Spectrum:**

**Scan number** 46509      **Raw file** A549-US-Mock-top20CID-Elite-2ug-B11  
**Method** ITMS; CID      **Genenames** NSMCE4A

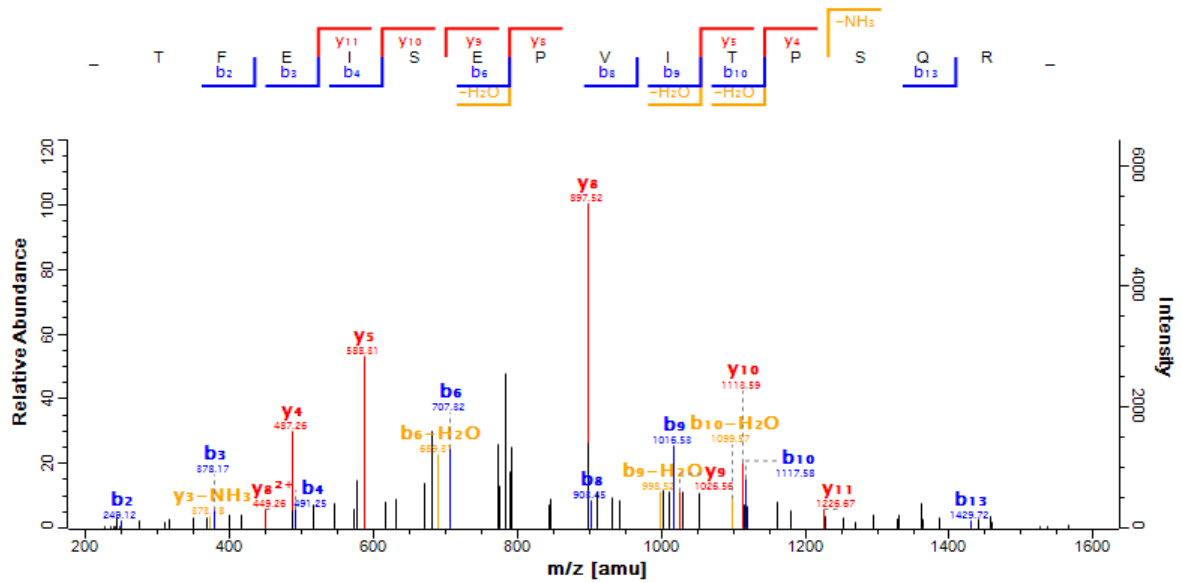

**Protein Group ID:** 4977  
**Protein Accession Numbers:** Q9NY97; Q9NY97-2  
**Gene Names:** B3GNT2  
**Peptide Sequence:** KPQEMIDIWSQLQSAHLK  
**Total Number of Spectra:** 2  
**Number of Replicates (out of 8):** 2  
**Best Match Score:** 97.095  
**Best Match Posterior Error Probability:** 0.00051267  
**Best Match Spectrum:**

**Scan number** 66512      **Raw file** A549-US-WT-top20CID-Elite-2ug-B12  
**Method** ITMS; CID      **Genenames** B3GNT2

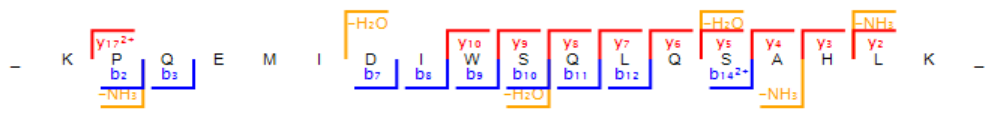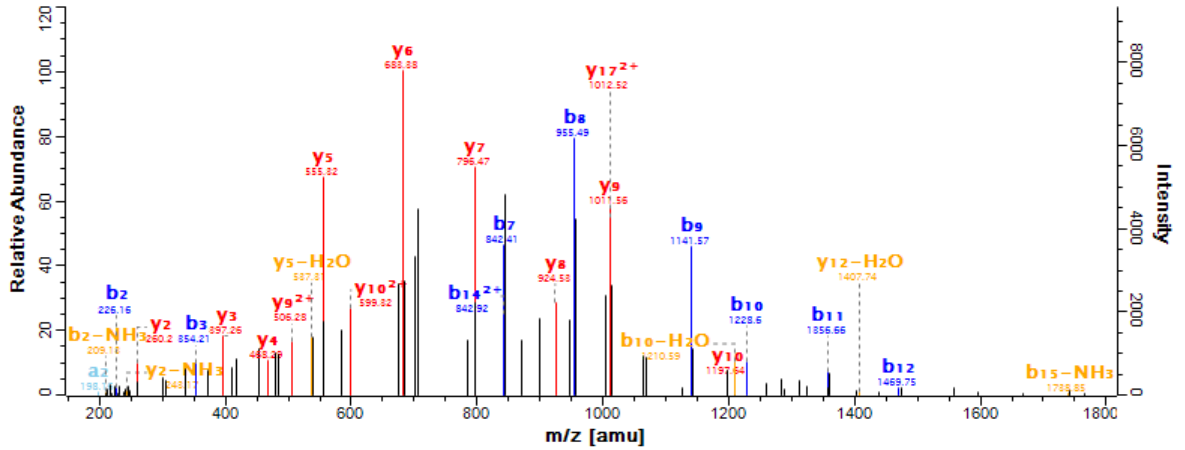

**Protein Group ID:** 4981  
**Protein Accession Numbers:** Q9NYJ1-2; Q9NYJ1  
**Gene Names:** CHCHD8  
**Peptide Sequence:** SGCAASHFAVQEQCM AQHQDWR  
**Total Number of Spectra:** 1  
**Number of Replicates (out of 8):** 1  
**Best Match Score:** 68.639  
**Best Match Posterior Error Probability:** 0.0015832  
**Best Match Spectrum:**

**Scan number** 35092      **Raw file** A549-US-Mock-top20CID-Elite-2ug-B11  
**Method** ITMS; CID      **Genenames** CHCHD8

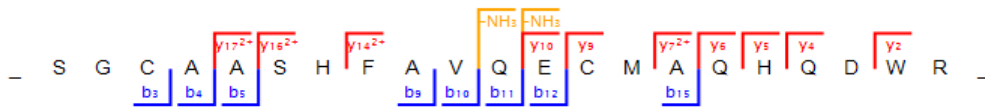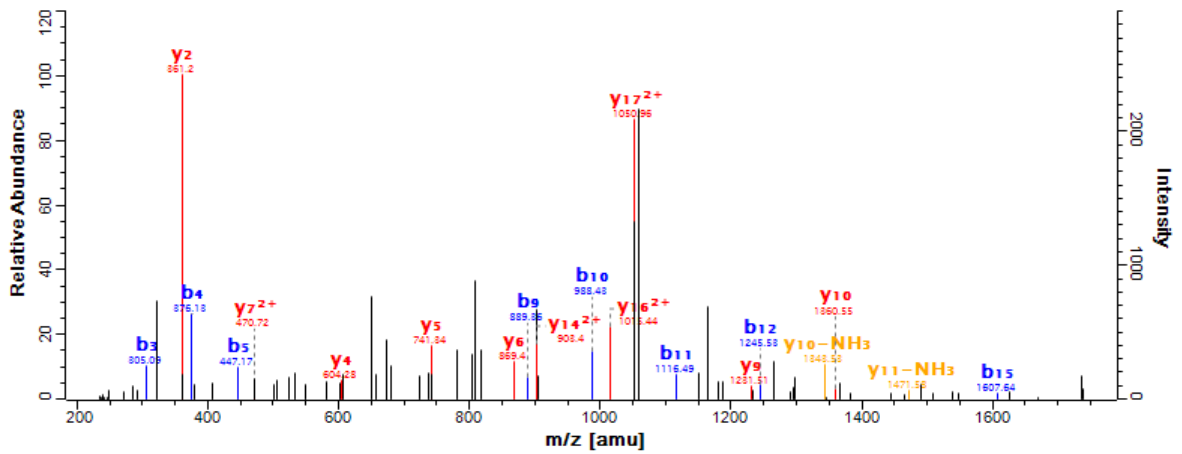

**Protein Group ID:** 4985

**Protein Accession Numbers:** Q9NYQ6

**Gene Names:** CELSR1

**Peptide Sequence:** SLDLTGPLLLGGVPNLPEDFPVHNR

**Total Number of Spectra:** 1

**Number of Replicates (out of 8):** 1

**Best Match Score:** 55.337

**Best Match Posterior Error Probability:** 0.0029273

**Best Match Spectrum:**

|                    |           |                  |                                     |
|--------------------|-----------|------------------|-------------------------------------|
| <b>Scan number</b> | 84678     | <b>Raw file</b>  | A549-US-Mock-top20CID-Elite-2ug-B13 |
| <b>Method</b>      | ITMS; CID | <b>Genenames</b> | CELSR1                              |

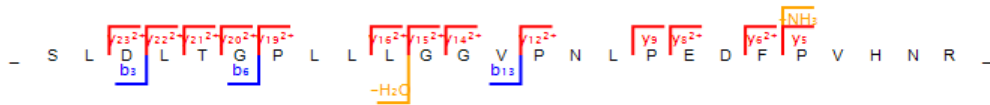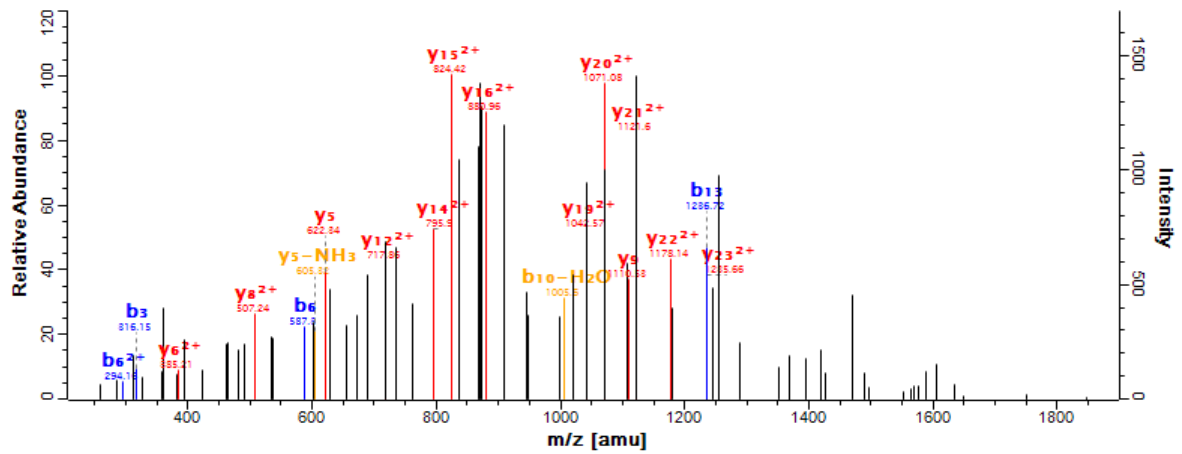

**Protein Group ID:** 4986  
**Protein Accession Numbers:** Q9NYT0  
**Gene Names:** PLEK2  
**Peptide Sequence:** SGDLAEQFLDDSTALYTFAESYK  
**Total Number of Spectra:** 1  
**Number of Replicates (out of 8):** 1  
**Best Match Score:** 65.425  
**Best Match Posterior Error Probability:** 0.0010724  
**Best Match Spectrum:**

**Scan number** 93865      **Raw file** A549-US-WT-top20CID-Elite-2ug-B12  
**Method** ITMS; CID      **Genenames** PLEK2

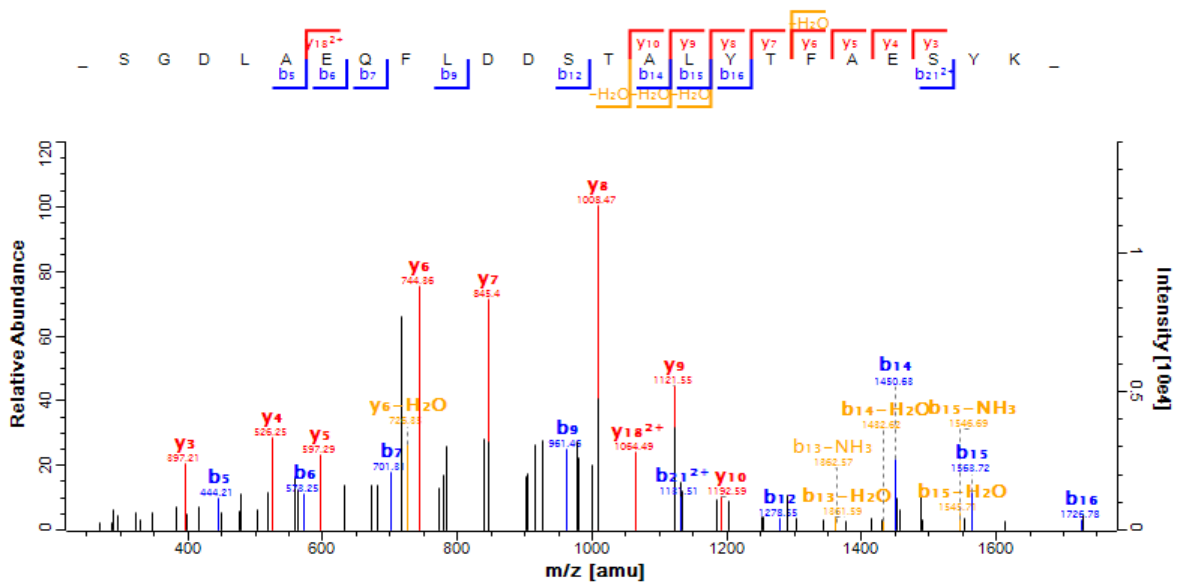

**Protein Group ID:** 4990  
**Protein Accession Numbers:** Q9NYZ3  
**Gene Names:** GTSE1  
**Peptide Sequence:** ESCTAHAASQAATQR  
**Total Number of Spectra:** 1  
**Number of Replicates (out of 8):** 1  
**Best Match Score:** 78.69  
**Best Match Posterior Error Probability:** 0.002883  
**Best Match Spectrum:**

**Scan number** 4179      **Raw file** A549-US-WT-top20CID-Elite-2ug-B14  
**Method** ITMS; CID      **Genenames** GTSE1

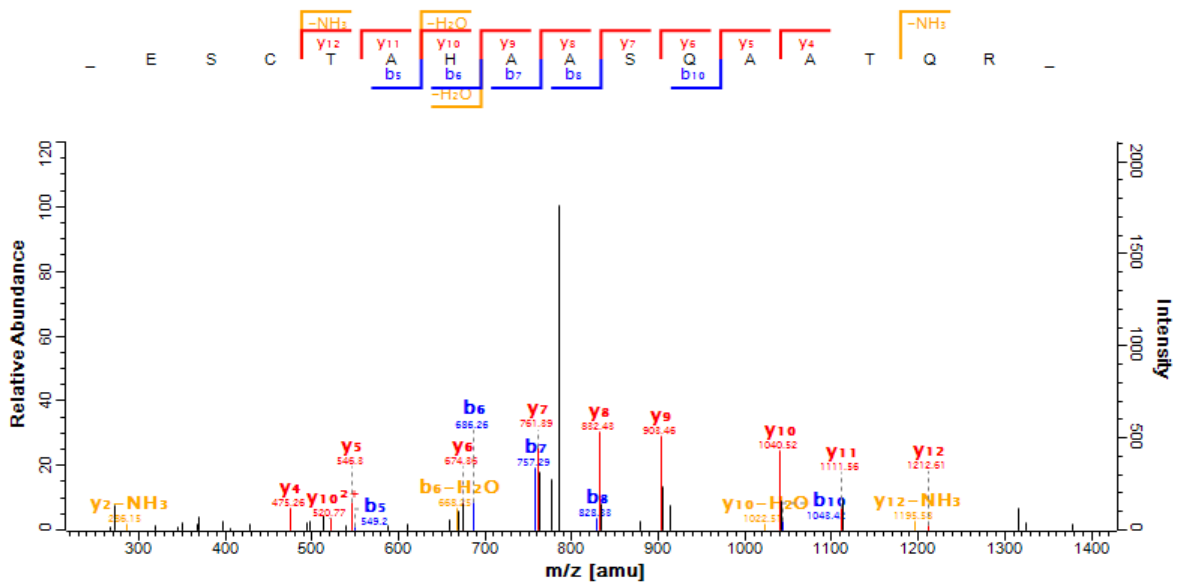

**Protein Group ID:** 5005  
**Protein Accession Numbers:** Q9NZN3  
**Gene Names:** EHD3  
**Peptide Sequence:** RMQDQLQAQDFSK  
**Total Number of Spectra:** 1  
**Number of Replicates (out of 8):** 1  
**Best Match Score:** 96.673  
**Best Match Posterior Error Probability:** 0.0055343  
**Best Match Spectrum:**

**Scan number** 23228      **Raw file** A549-US-WT-top20CID-Elite-2ug-B13  
**Method** ITMS; CID      **Genenames** EHD3

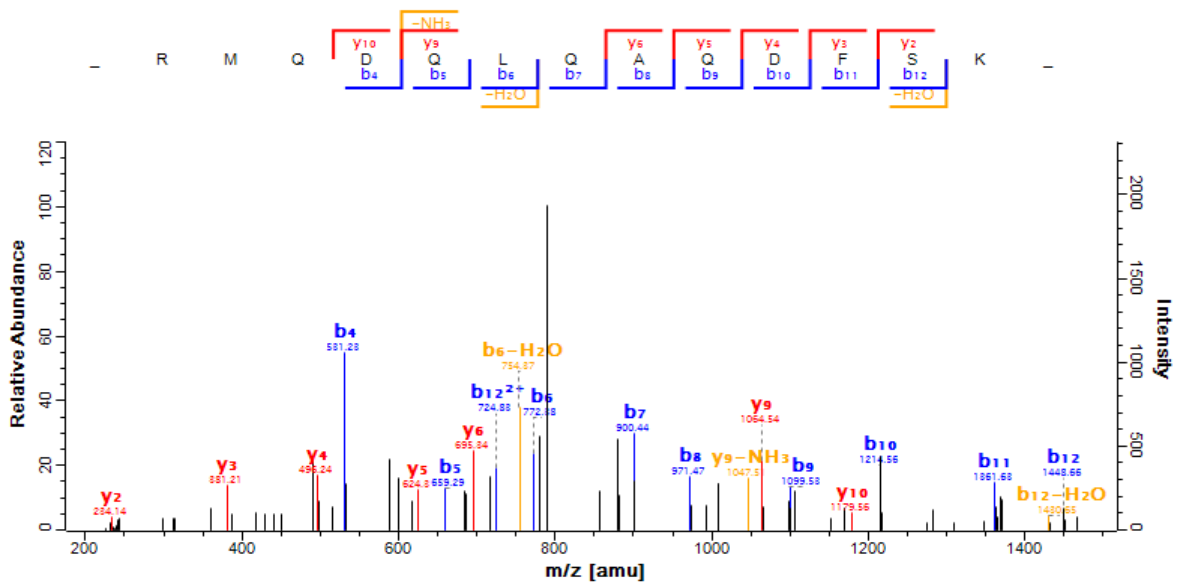

**Protein Group ID:** 5009  
**Protein Accession Numbers:** Q9NZV1  
**Gene Names:** CRIM1  
**Peptide Sequence:** QNHLQADNFYQTV  
**Total Number of Spectra:** 1  
**Number of Replicates (out of 8):** 1  
**Best Match Score:** 107.09  
**Best Match Posterior Error Probability:** 0.00037736  
**Best Match Spectrum:**

**Scan number** 39495      **Raw file** A549-US-WT-top20CID-Elite-2ug-B14  
**Method** ITMS; CID      **Genenames** CRIM1

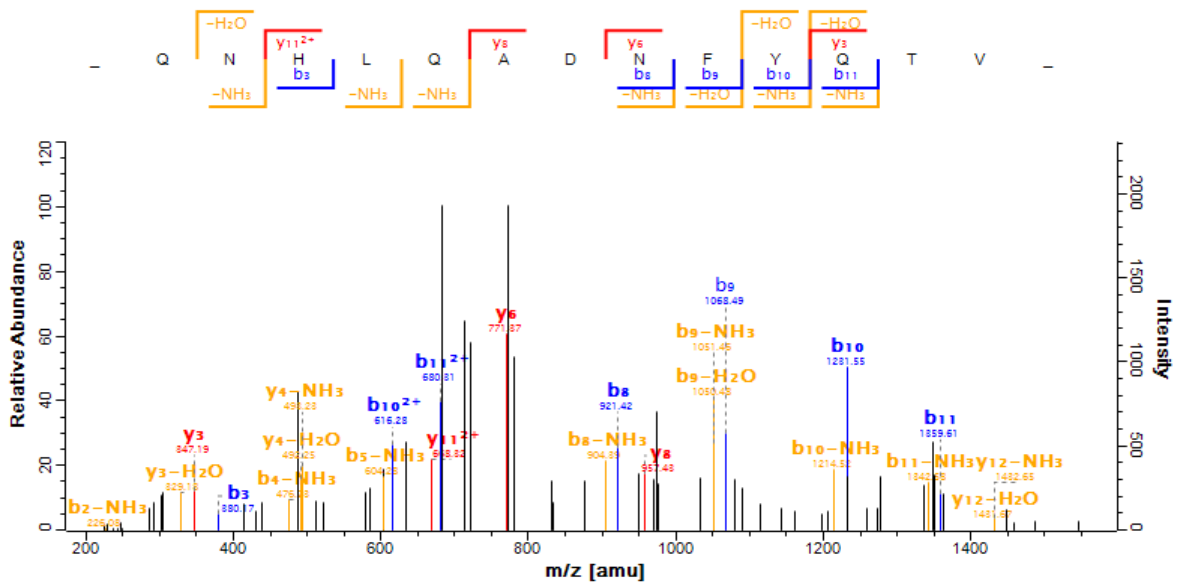



**Protein Group ID:** 5012  
**Protein Accession Numbers:** Q9P013  
**Gene Names:** CWC15  
**Peptide Sequence:** QTTQDAPEEVR  
**Total Number of Spectra:** 2  
**Number of Replicates (out of 8):** 2  
**Best Match Score:** 94.191  
**Best Match Posterior Error Probability:** 0.0010422  
**Best Match Spectrum:**

**Scan number** 6762      **Raw file** A549-US-WT-top20CID-Elite-2ug-B14  
**Method** ITMS; CID      **Genenames** CWC15

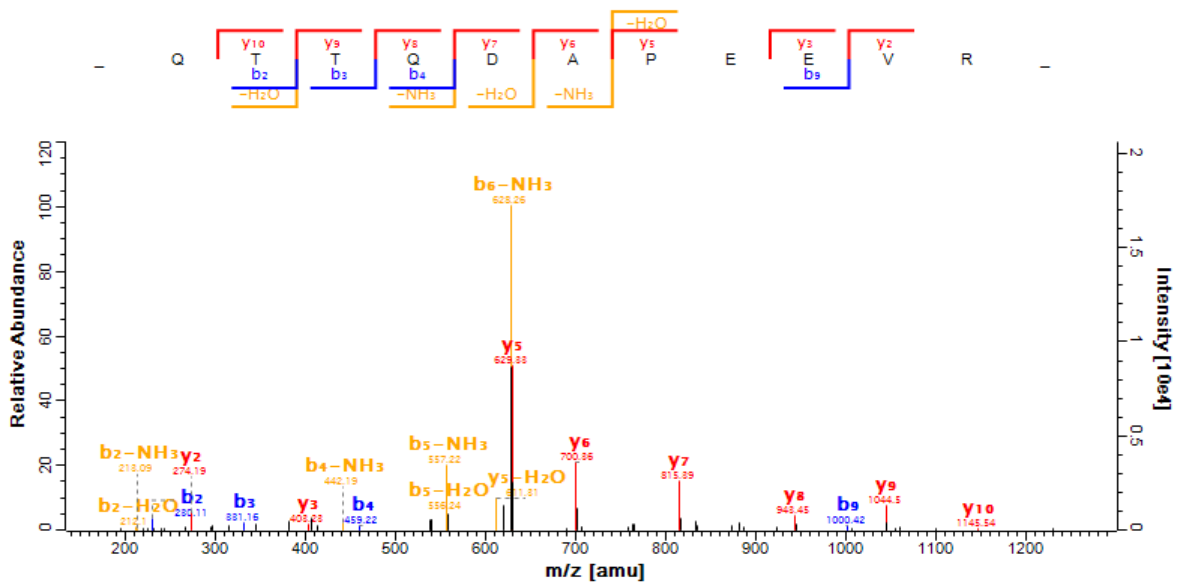

**Protein Group ID:** 5016  
**Protein Accession Numbers:** Q9P031  
**Gene Names:** CCDC59  
**Peptide Sequence:** AQEYEYEQIAK  
**Total Number of Spectra:** 3  
**Number of Replicates (out of 8):** 3  
**Best Match Score:** 84.605  
**Best Match Posterior Error Probability:** 0.0025518  
**Best Match Spectrum:**

**Scan number** 14200      **Raw file** A549-US-WT-top20CID-Elite-2ug-B14  
**Method** ITMS; CID      **Genenames** CCDC59

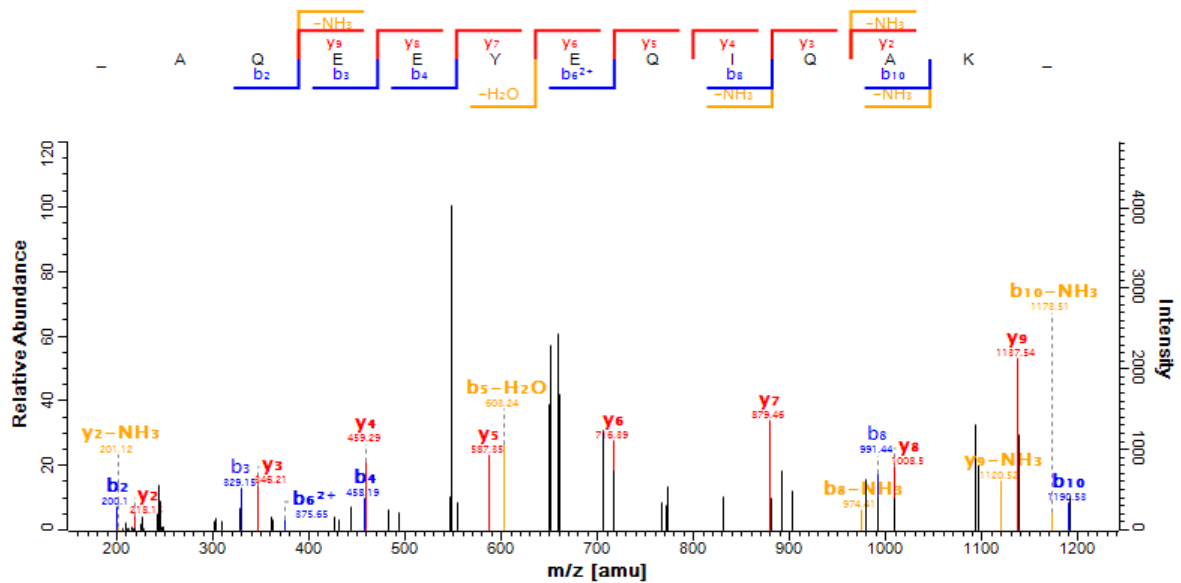

**Protein Group ID:** 5023  
**Protein Accession Numbers:** Q9P0R6  
**Gene Names:** GSKIP  
**Peptide Sequence:** EAFGNALLQR  
**Total Number of Spectra:** 1  
**Number of Replicates (out of 8):** 1  
**Best Match Score:** 89.08  
**Best Match Posterior Error Probability:** 0.0020971  
**Best Match Spectrum:**

|                    |           |                  |                                   |
|--------------------|-----------|------------------|-----------------------------------|
| <b>Scan number</b> | 38925     | <b>Raw file</b>  | A549-US-WT-top20CID-Elite-2ug-B11 |
| <b>Method</b>      | ITMS; CID | <b>Genenames</b> | GSKIP                             |

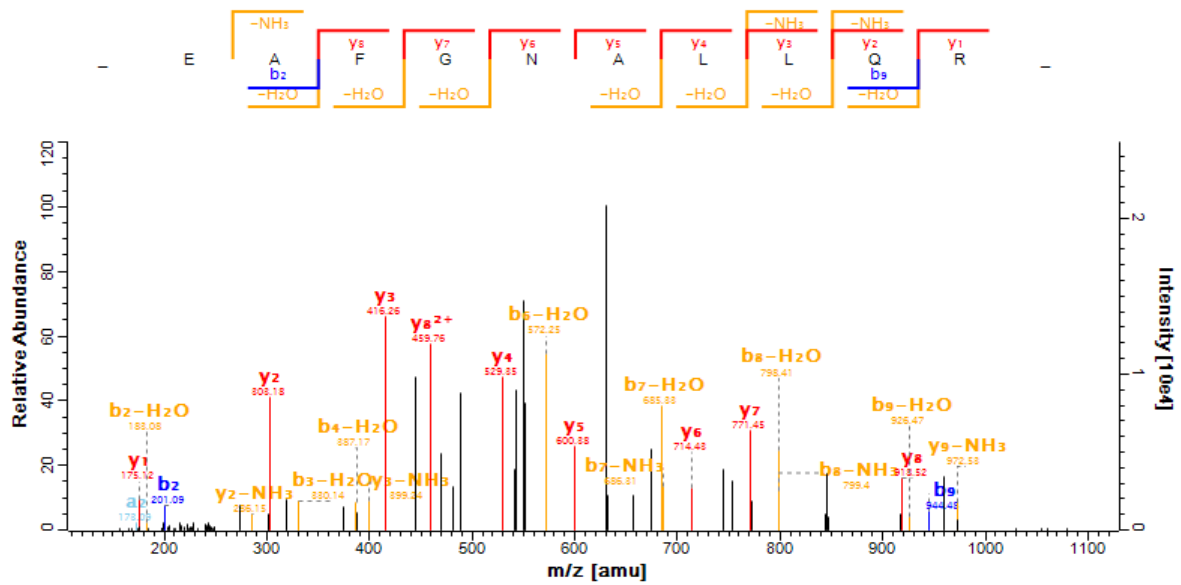

**Protein Group ID:** 5024  
**Protein Accession Numbers:** Q9P0S2  
**Gene Names:** COX16  
**Peptide Sequence:** GPRPWEDPDLQGR  
**Total Number of Spectra:** 2  
**Number of Replicates (out of 8):** 2  
**Best Match Score:** 126.95  
**Best Match Posterior Error Probability:** 0.0001686  
**Best Match Spectrum:**

**Scan number** 44922      **Raw file** A549-US-WT-top20CID-Elite-2ug-B14  
**Method** ITMS; CID      **Genenames** COX16

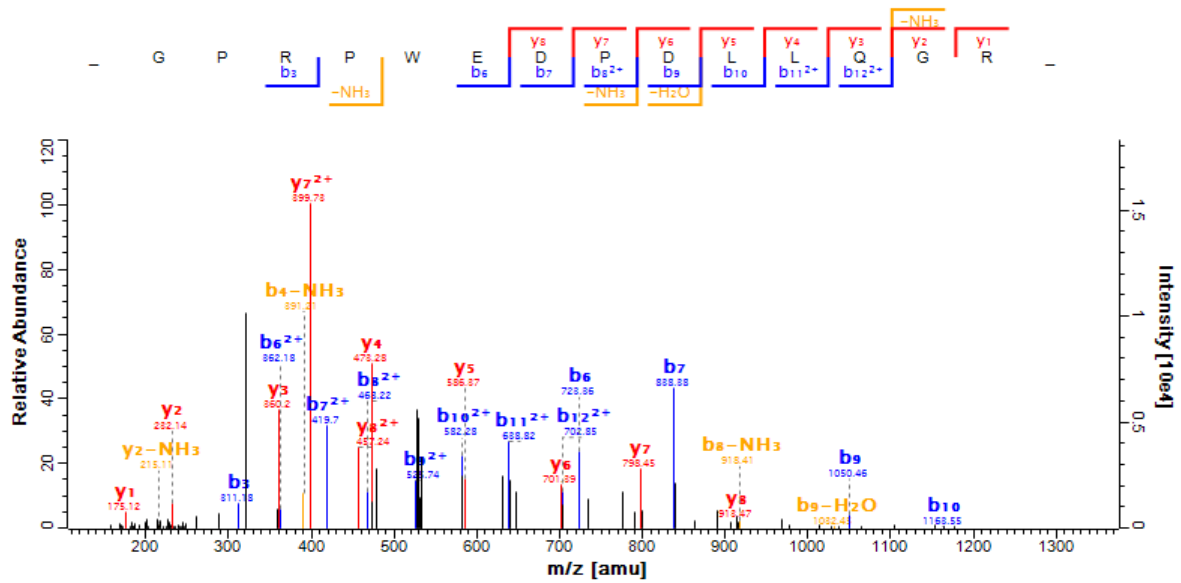

**Protein Group ID:** 5032  
**Protein Accession Numbers:** Q9P270  
**Gene Names:** SLAIN2  
**Peptide Sequence:** SGAVQGAGSLGPGSPVR  
**Total Number of Spectra:** 5  
**Number of Replicates (out of 8):** 5  
**Best Match Score:** 166.48  
**Best Match Posterior Error Probability:** 5.05E-10  
**Best Match Spectrum:**

**Scan number** 23654      **Raw file** A549-US-WT-top20CID-Elite-2ug-B13  
**Method** ITMS; CID      **Genenames** SLAIN2

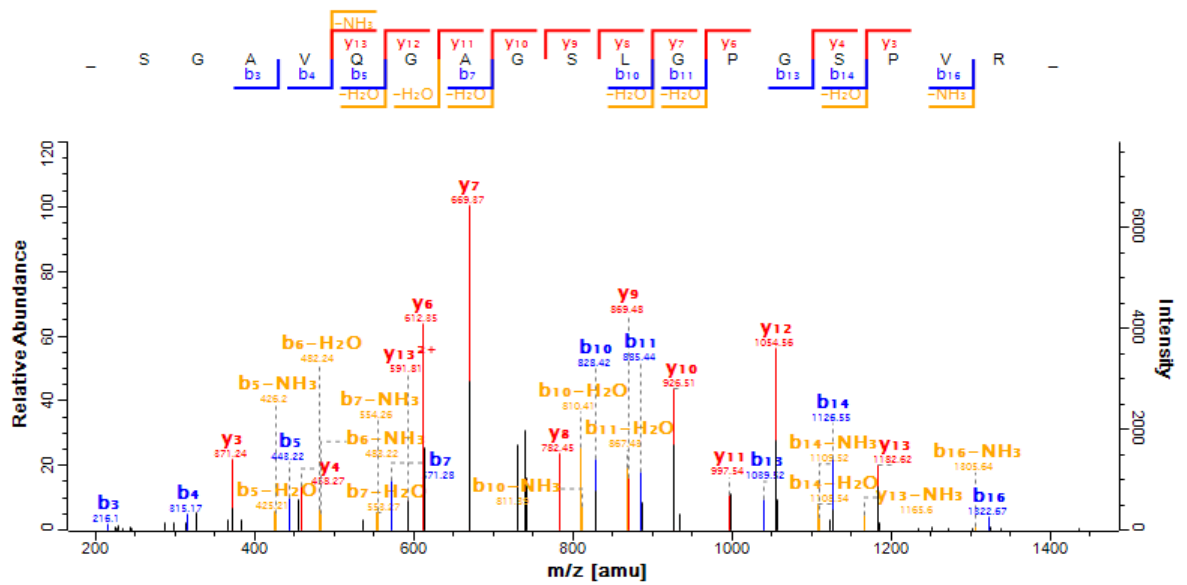

**Protein Group ID:** 5044  
**Protein Accession Numbers:** Q9P2X0-2; Q9P2X0  
**Gene Names:** DPM3  
**Peptide Sequence:** VATFHDCEDAAR  
**Total Number of Spectra:** 4  
**Number of Replicates (out of 8):** 4  
**Best Match Score:** 113.61  
**Best Match Posterior Error Probability:** 0.00021508  
**Best Match Spectrum:**

**Scan number** 10216      **Raw file** A549-US-WT-top20CID-Elite-2ug-B11  
**Method** ITMS; CID      **Genenames** DPM3

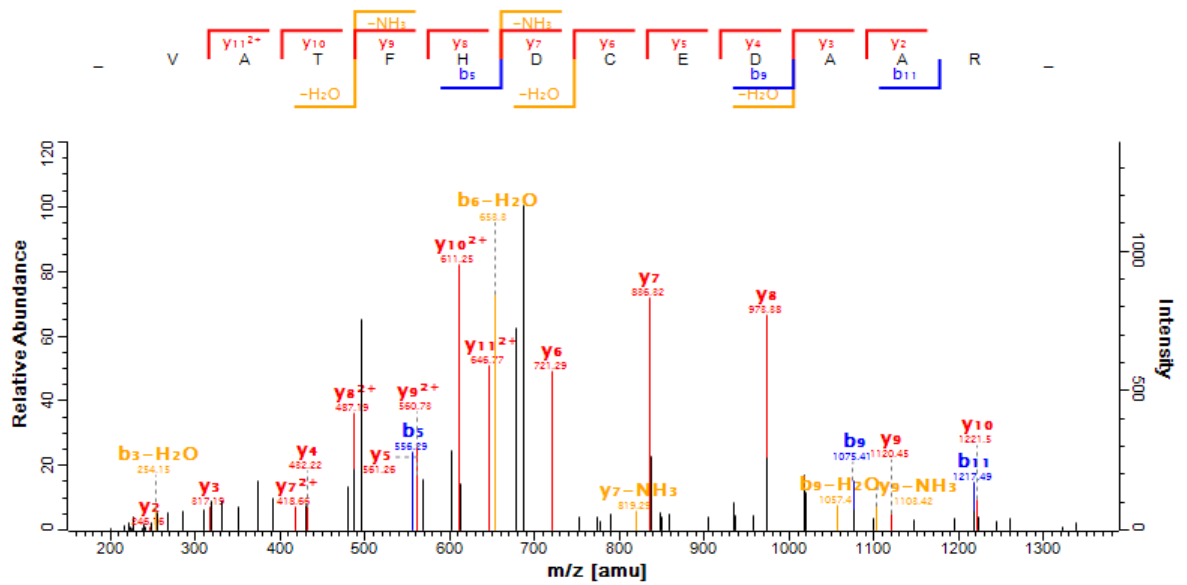

**Protein Group ID:** 5056  
**Protein Accession Numbers:** Q9UBK9  
**Gene Names:** UXT  
**Peptide Sequence:** AHIHMLLEGLR  
**Total Number of Spectra:** 2  
**Number of Replicates (out of 8):** 2  
**Best Match Score:** 105.98  
**Best Match Posterior Error Probability:** 0.00030271  
**Best Match Spectrum:**

**Scan number** 40053      **Raw file** A549-US-Mock-top20CID-Elite-2ug-B12  
**Method** ITMS; CID      **Genenames** UXT

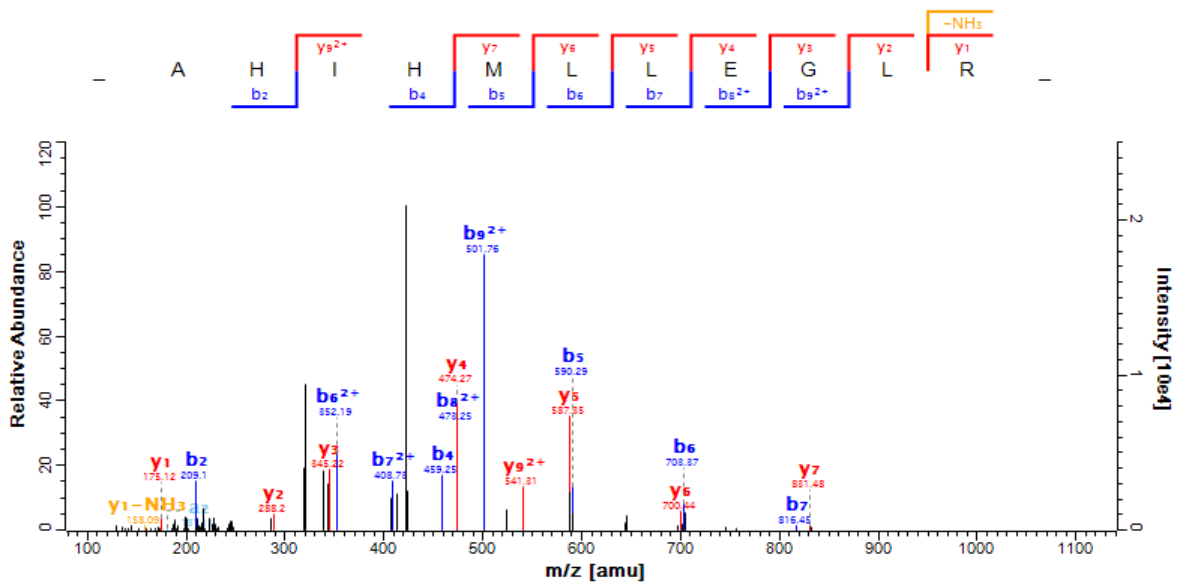

**Protein Group ID:** 5090

**Protein Accession Numbers:** Q9UHA4

**Gene Names:** LAMTOR3

**Peptide Sequence:** VANDNAP EHLRLP GFLSTFALATDQGSK

**Total Number of Spectra:** 5

**Number of Replicates (out of 8):** 5

**Best Match Score:** 107.75

**Best Match Posterior Error Probability:** 4.22E-08

**Best Match Spectrum:**

**Scan number** 62019      **Raw file** A549-US-WT-top20CID-Elite-2ug-B12  
**Method** ITMS; CID      **Genenames** LAMTOR3

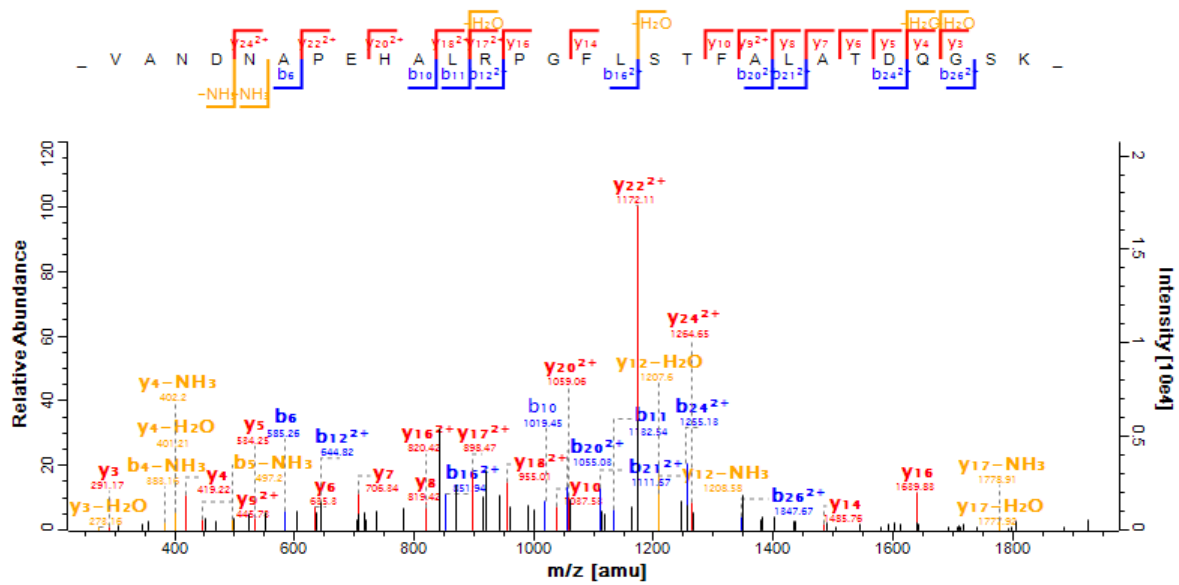



**Protein Group ID:** 5097

**Protein Accession Numbers:** Q9UHG0; Q9UHG0-2

**Gene Names:** DCDC2

**Peptide Sequence:** ITSPEENENNQQNK

**Total Number of Spectra:** 2

**Number of Replicates (out of 8):** 2

**Best Match Score:** 110.51

**Best Match Posterior Error Probability:** 0.00016395

**Best Match Spectrum:**

**Scan number** 3714      **Raw file** A549-US-Mock-top20CID-Elite-2ug-B11  
**Method** ITMS; CID      **Genenames** DCDC2

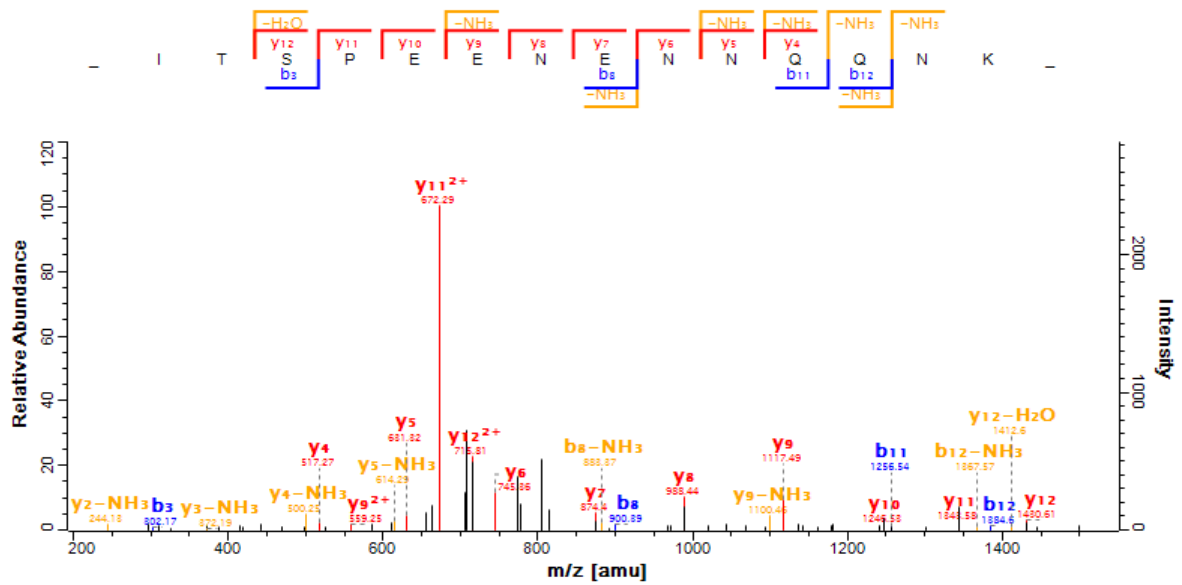

**Protein Group ID:** 5106  
**Protein Accession Numbers:** Q9UHR6  
**Gene Names:** ZNHIT2  
**Peptide Sequence:** DASAAEPAAAER  
**Total Number of Spectra:** 1  
**Number of Replicates (out of 8):** 1  
**Best Match Score:** 83.137  
**Best Match Posterior Error Probability:** 0.0026505  
**Best Match Spectrum:**

**Scan number** 4982      **Raw file** A549-US-Mock-top20CID-Elite-2ug-B14  
**Method** ITMS; CID      **Genenames** ZNHIT2

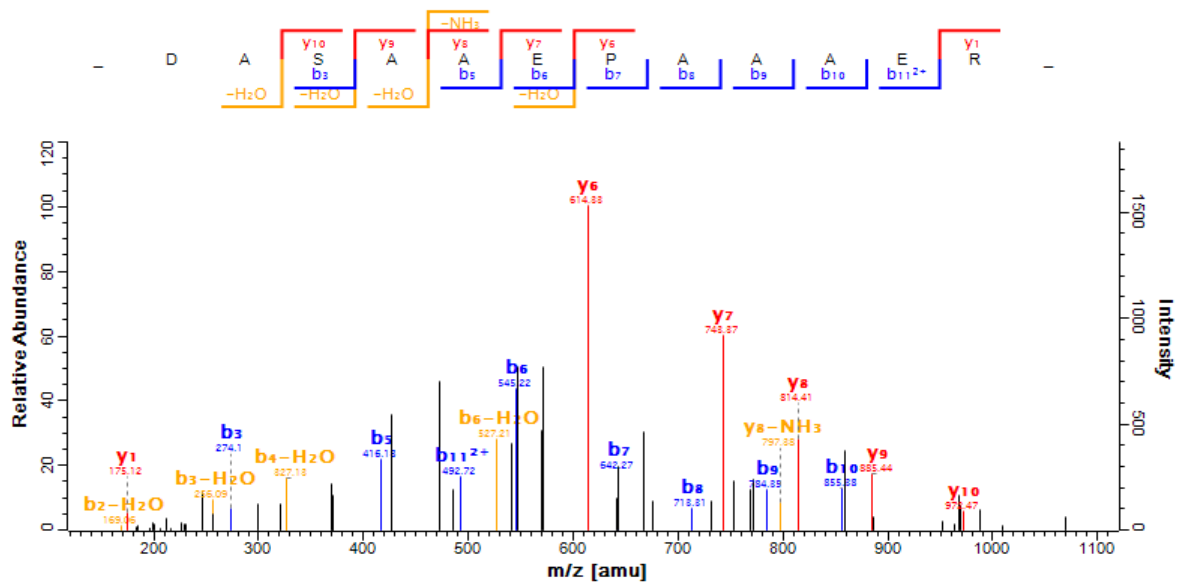

**Protein Group ID:** 5115  
**Protein Accession Numbers:** Q9UI14  
**Gene Names:** RABAC1  
**Peptide Sequence:** ATIRPWSTFVDQQR  
**Total Number of Spectra:** 6  
**Number of Replicates (out of 8):** 5  
**Best Match Score:** 115.12  
**Best Match Posterior Error Probability:** 0.00050755  
**Best Match Spectrum:**

**Scan number** 46683      **Raw file** A549-US-WT-top20CID-Elite-2ug-B13  
**Method** ITMS; CID      **Genenames** RABAC1

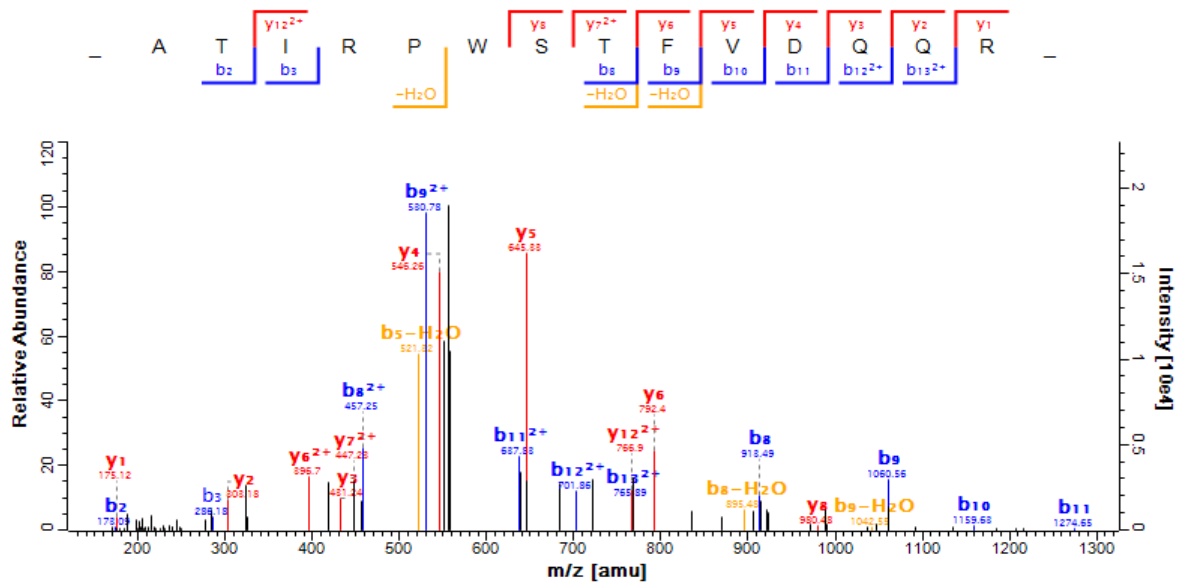

**Protein Group ID:** 5120  
**Protein Accession Numbers:** Q9UII2  
**Gene Names:** ATP1F1  
**Peptide Sequence:** HHEEEIVHHK  
**Total Number of Spectra:** 1  
**Number of Replicates (out of 8):** 1  
**Best Match Score:** 108.67  
**Best Match Posterior Error Probability:** 0.0013835  
**Best Match Spectrum:**

**Scan number** 1629      **Raw file** A549-US-WT-top20CID-Elite-2ug-B12  
**Method** ITMS; CID      **Genenames** ATP1F1

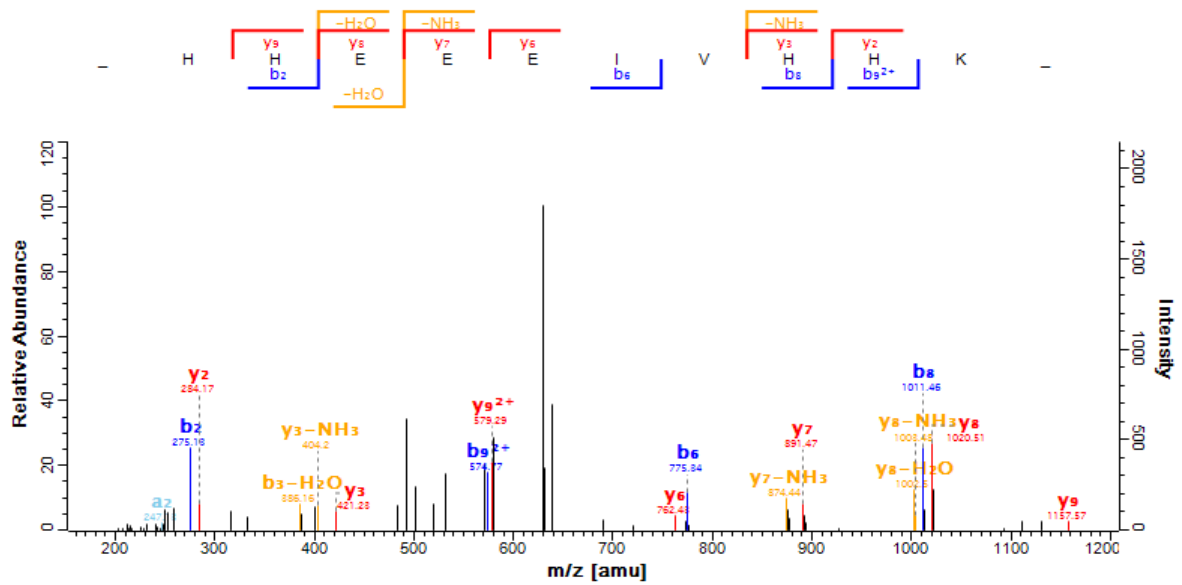



**Protein Group ID:** 5127  
**Protein Accession Numbers:** Q9UJK0  
**Gene Names:** C16orf42  
**Peptide Sequence:** GGASSSCCEEEQTQGR  
**Total Number of Spectra:** 6  
**Number of Replicates (out of 8):** 6  
**Best Match Score:** 160.04  
**Best Match Posterior Error Probability:** 1.79E-09  
**Best Match Spectrum:**

**Scan number** 2642      **Raw file** A549-US-Mock-top20CID-Elite-2ug-B12  
**Method** ITMS; CID      **Genenames** C16orf42

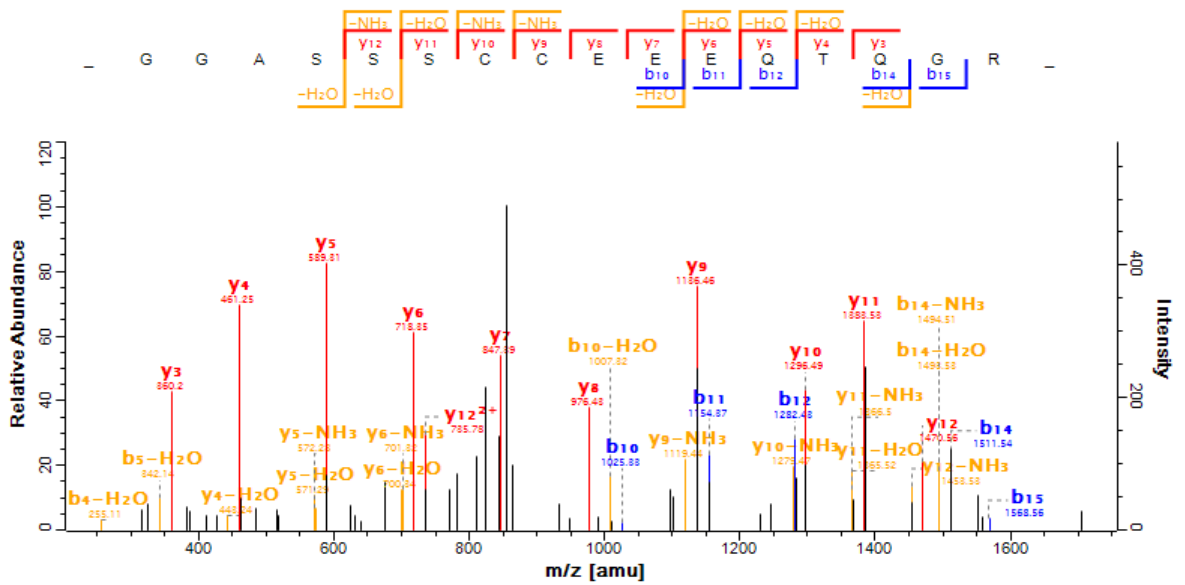

**Protein Group ID:** 5138

**Protein Accession Numbers:** Q9UK45

**Gene Names:** LSM7

**Peptide Sequence:** GFDPLLNLVLDGTIEYMRDPDDQYK

**Total Number of Spectra:** 4

**Number of Replicates (out of 8):** 4

**Best Match Score:** 134.86

**Best Match Posterior Error Probability:** 1.36E-17

**Best Match Spectrum:**

**Scan number** 92241      **Raw file** A549-US-Mock-top20CID-Elite-2ug-B12  
**Method** ITMS; CID      **Genenames** LSM7

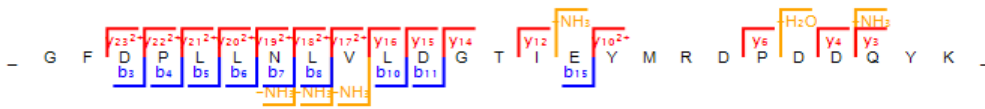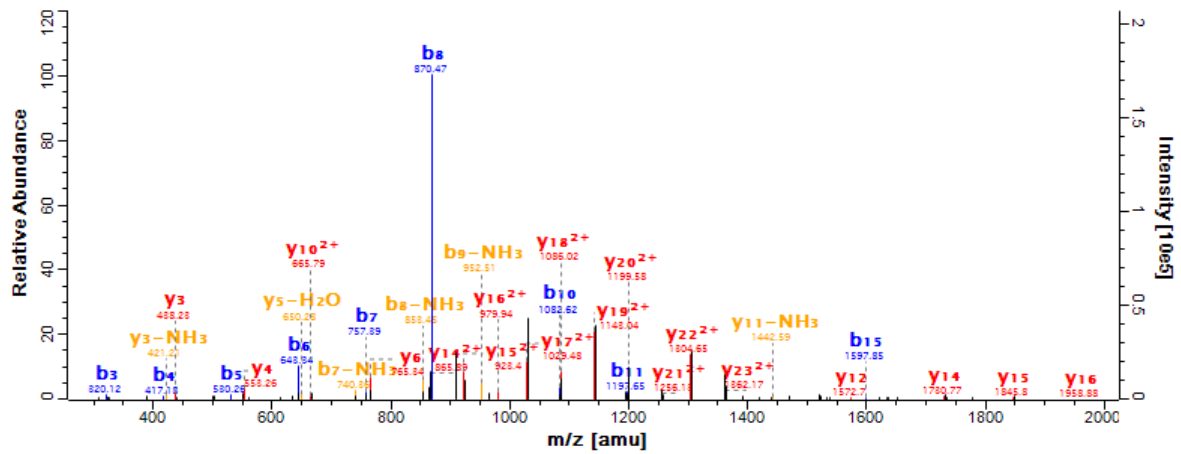

**Protein Group ID:** 5158

**Protein Accession Numbers:** Q9UL54; Q9UL54-4; Q9UL54-3; Q9UL54-2

**Gene Names:** TAOK2

**Peptide Sequence:** EELQENPSTPK

**Total Number of Spectra:** 2

**Number of Replicates (out of 8):** 2

**Best Match Score:** 113.61

**Best Match Posterior Error Probability:** 0.00011586

**Best Match Spectrum:**

|                    |           |                  |                                     |
|--------------------|-----------|------------------|-------------------------------------|
| <b>Scan number</b> | 9472      | <b>Raw file</b>  | A549-US-Mock-top20CID-Elite-2ug-B12 |
| <b>Method</b>      | ITMS; CID | <b>Genenames</b> | TAOK2                               |

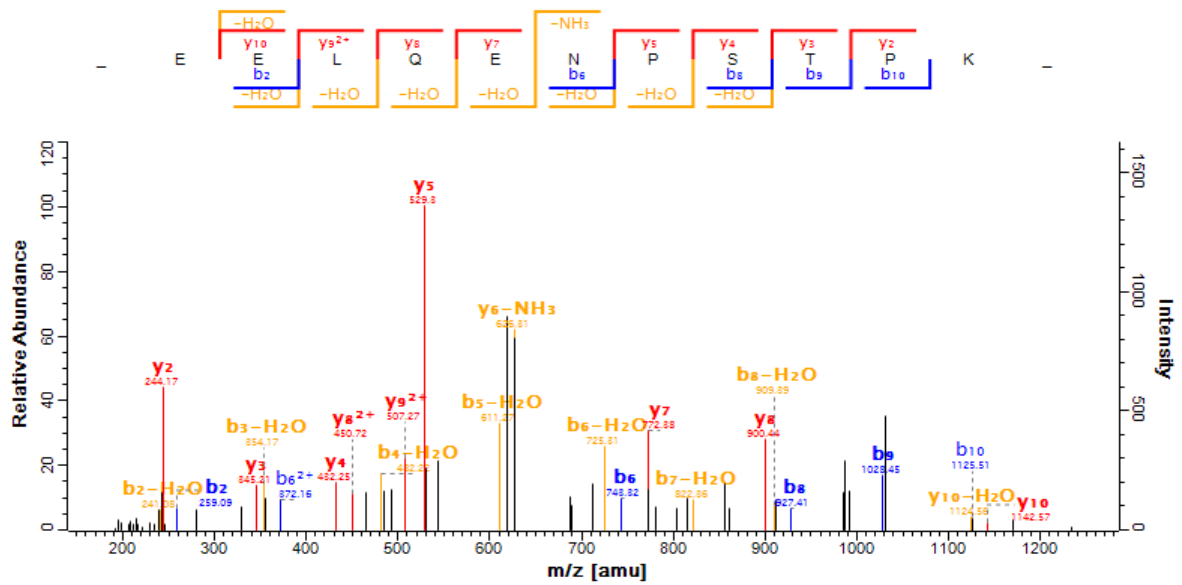



**Protein Group ID:** 5159  
**Protein Accession Numbers:** Q9ULC3  
**Gene Names:** RAB23  
**Peptide Sequence:** VVAEVDIPTVLVQNK  
**Total Number of Spectra:** 2  
**Number of Replicates (out of 8):** 2  
**Best Match Score:** 110.35  
**Best Match Posterior Error Probability:** 0.00010918  
**Best Match Spectrum:**

**Scan number** 56374      **Raw file** A549-US-WT-top20CID-Elite-2ug-B12  
**Method** ITMS; CID      **Genenames** RAB23

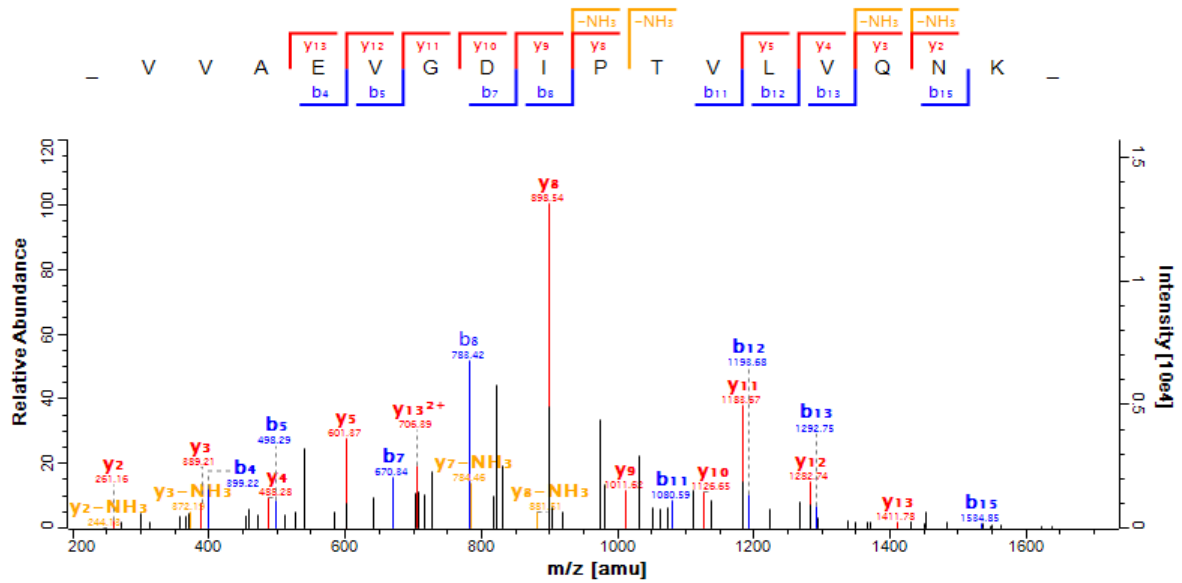

**Protein Group ID:** 5165  
**Protein Accession Numbers:** Q9ULI1  
**Gene Names:** KIAA1239  
**Peptide Sequence:** IHDLDLFINLLNESSLR  
**Total Number of Spectra:** 2  
**Number of Replicates (out of 8):** 1  
**Best Match Score:** 73.983  
**Best Match Posterior Error Probability:** 0.0016788  
**Best Match Spectrum:**

**Scan number** 88077      **Raw file** A549-US-WT-top20CID-Elite-2ug-B14  
**Method** ITMS; CID      **Genenames** KIAA1239

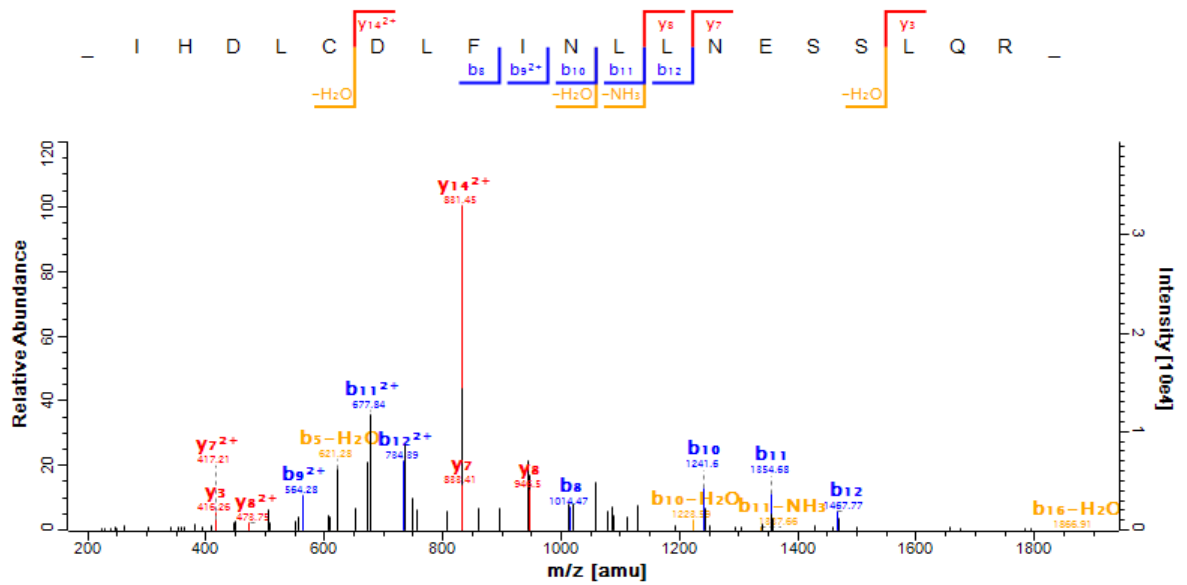

**Protein Group ID:** 5191  
**Protein Accession Numbers:** Q9UNX3  
**Gene Names:** RPL26L1  
**Peptide Sequence:** YKEELIEK  
**Total Number of Spectra:** 1  
**Number of Replicates (out of 8):** 1  
**Best Match Score:** 128.86  
**Best Match Posterior Error Probability:** 0.0076547  
**Best Match Spectrum:**

|                    |           |                  |                                     |
|--------------------|-----------|------------------|-------------------------------------|
| <b>Scan number</b> | 12061     | <b>Raw file</b>  | A549-US-Mock-top20CID-Elite-2ug-B11 |
| <b>Method</b>      | ITMS; CID | <b>Genenames</b> | RPL26L1                             |

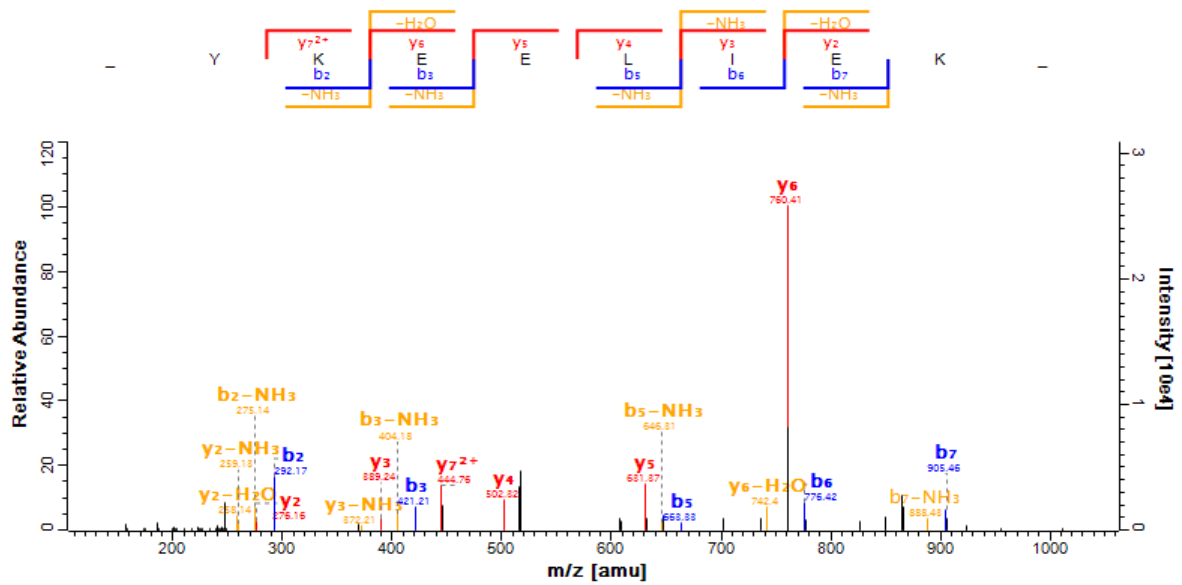

**Protein Group ID:** 5195  
**Protein Accession Numbers:** Q9UPQ9; Q9UPQ9-1  
**Gene Names:** TNRC6B  
**Peptide Sequence:** DTESSSENTTDNNSASNPGSEK  
**Total Number of Spectra:** 2  
**Number of Replicates (out of 8):** 2  
**Best Match Score:** 70.453  
**Best Match Posterior Error Probability:** 0.00081396  
**Best Match Spectrum:**

**Scan number** 3808      **Raw file** A549-US-WT-top20CID-Elite-2ug-B12  
**Method** ITMS; CID      **Genenames** TNRC6B

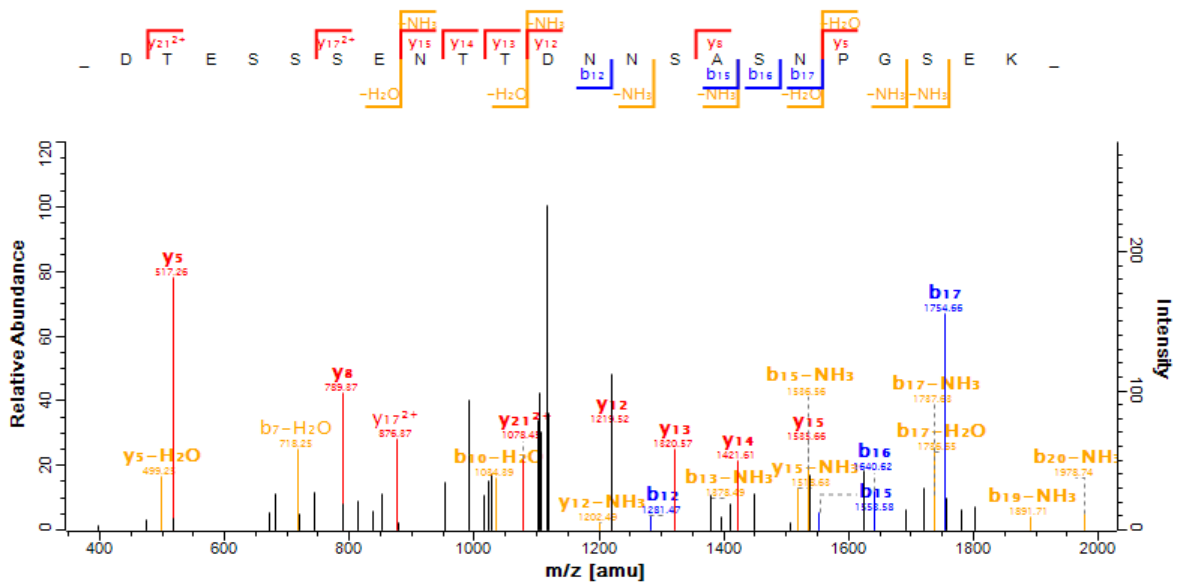



**Protein Group ID:** 5209  
**Protein Accession Numbers:** Q9Y243; Q9Y243-2  
**Gene Names:** AKT3  
**Peptide Sequence:** DEVAHTLTESR  
**Total Number of Spectra:** 1  
**Number of Replicates (out of 8):** 1  
**Best Match Score:** 82.417  
**Best Match Posterior Error Probability:** 0.003201  
**Best Match Spectrum:**

**Scan number** 12187      **Raw file** A549-US-Mock-top20CID-Elite-2ug-B11  
**Method** ITMS; CID      **Genenames** AKT3

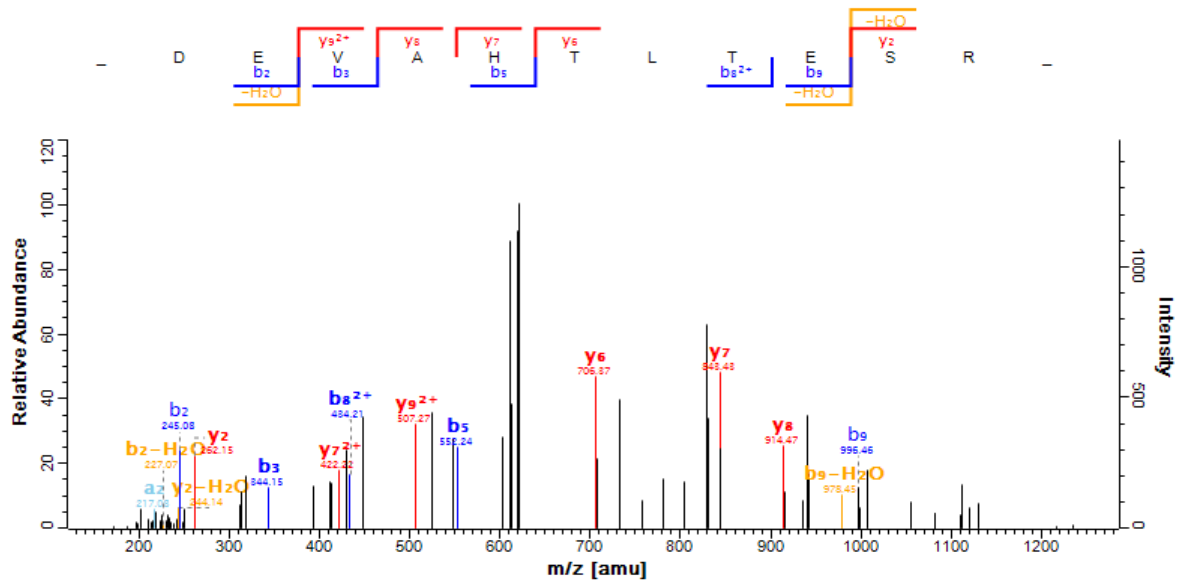

**Protein Group ID:** 5222  
**Protein Accession Numbers:** Q9Y294  
**Gene Names:** ASF1A  
**Peptide Sequence:** VGYYYVNNNEYTETELR  
**Total Number of Spectra:** 6  
**Number of Replicates (out of 8):** 5  
**Best Match Score:** 148.57  
**Best Match Posterior Error Probability:** 1.04E-06  
**Best Match Spectrum:**

**Scan number** 40587      **Raw file** A549-US-WT-top20CID-Elite-2ug-B14  
**Method** ITMS; CID      **Genenames** ASF1A

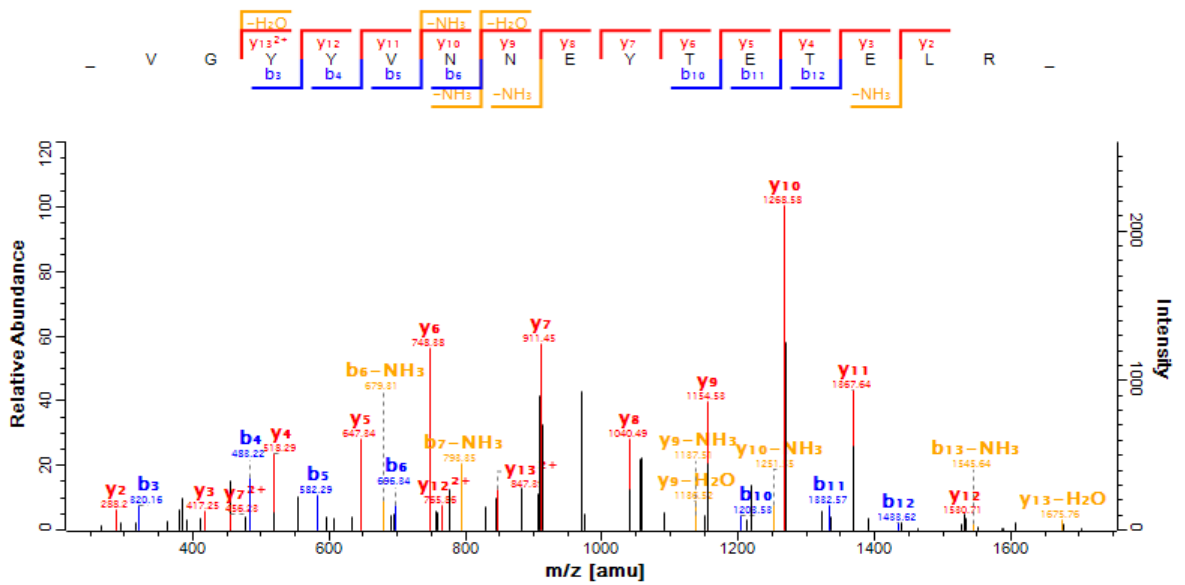

**Protein Group ID:** 5225  
**Protein Accession Numbers:** Q9Y2B0; H0YI18  
**Gene Names:** CNPY2  
**Peptide Sequence:** RTDLCDHALHISHDEL  
**Total Number of Spectra:** 3  
**Number of Replicates (out of 8):** 3  
**Best Match Score:** 115.68  
**Best Match Posterior Error Probability:** 0.00022537  
**Best Match Spectrum:**

**Scan number** 33365      **Raw file** A549-US-WT-top20CID-Elite-2ug-B13  
**Method** ITMS; CID      **Genenames** CNPY2

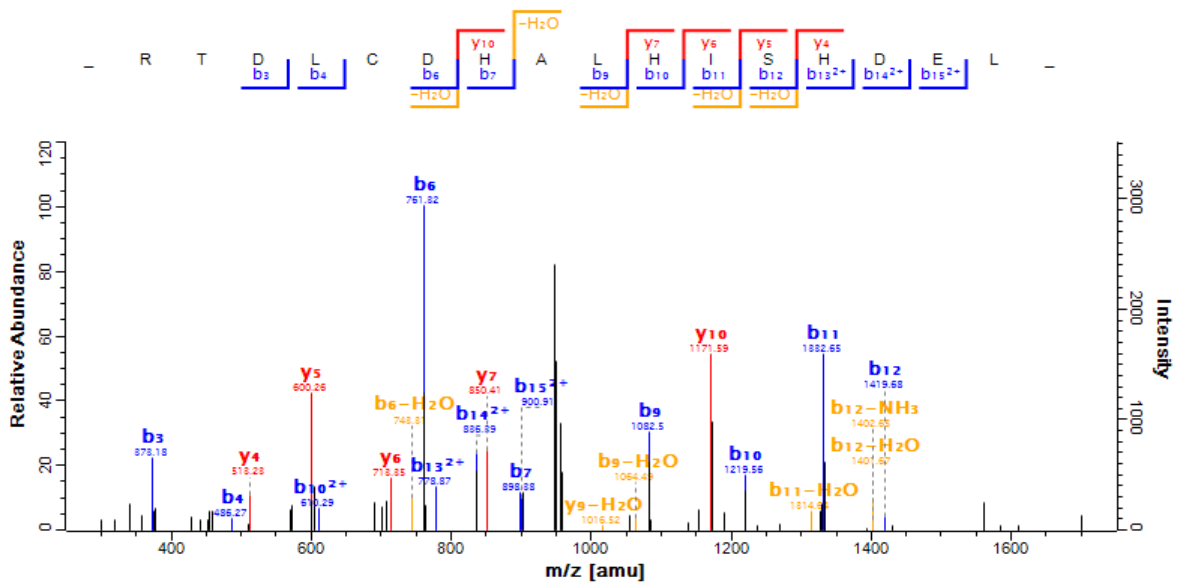



**Protein Group ID:** 5228

**Protein Accession Numbers:** Q9Y2J4-4; Q9Y2J4-2; Q9Y2J4; Q9Y2J4-3

**Gene Names:** AMOTL2

**Peptide Sequence:** TQEAQAGSQDMVAK

**Total Number of Spectra:** 7

**Number of Replicates (out of 8):** 6

**Best Match Score:** 163.64

**Best Match Posterior Error Probability:** 1.03E-09

**Best Match Spectrum:**

**Scan number** 8360      **Raw file** A549-US-WT-top20CID-Elite-2ug-B12  
**Method** ITMS; CID      **Genenames** AMOTL2

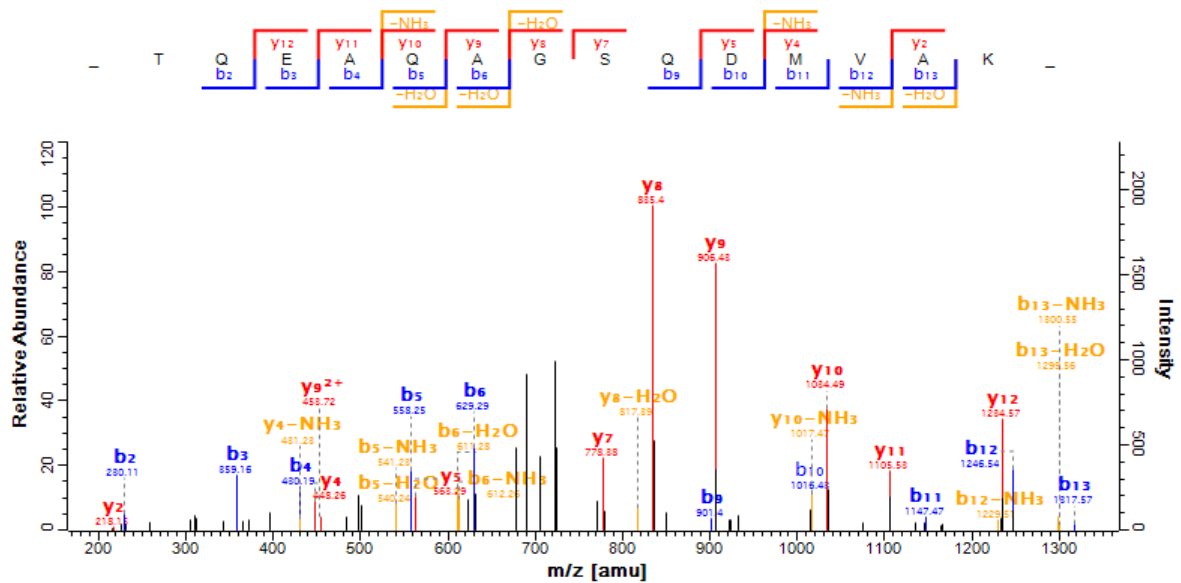

**Protein Group ID:** 5230

**Protein Accession Numbers:** Q9Y2L9-3; Q9Y2L9; Q9Y2L9-2

**Gene Names:** LRCH1

**Peptide Sequence:** NLESIDPQFTIR

**Total Number of Spectra:** 2

**Number of Replicates (out of 8):** 2

**Best Match Score:** 117.03

**Best Match Posterior Error Probability:** 0.0001701

**Best Match Spectrum:**

|                    |           |                  |                                   |
|--------------------|-----------|------------------|-----------------------------------|
| <b>Scan number</b> | 53849     | <b>Raw file</b>  | A549-US-WT-top20CID-Elite-2ug-B11 |
| <b>Method</b>      | ITMS; CID | <b>Genenames</b> | LRCH1                             |

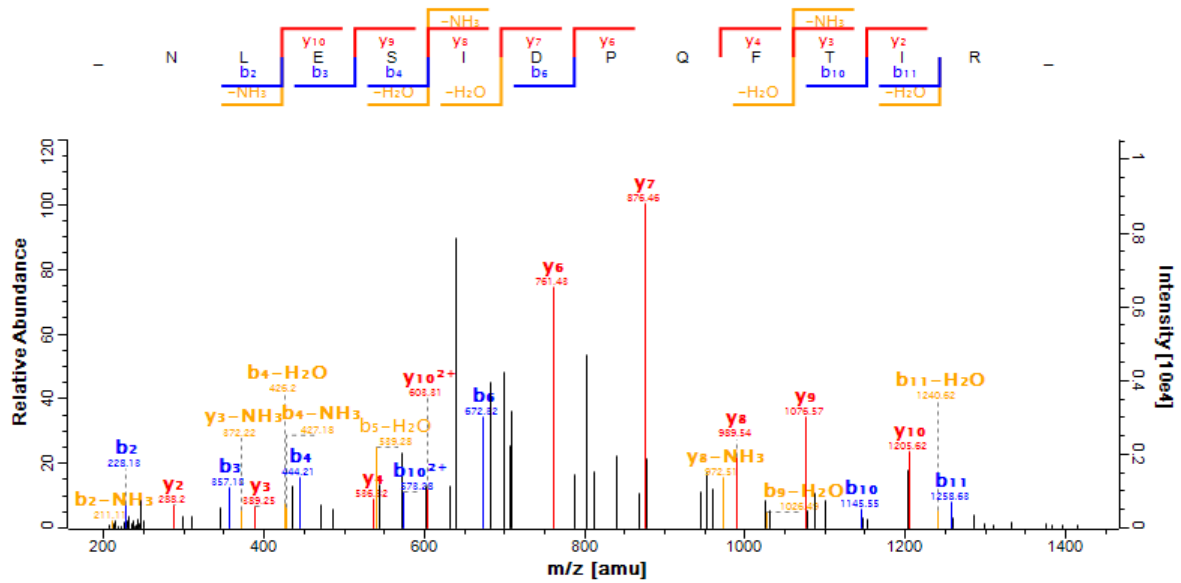

**Protein Group ID:** 5264  
**Protein Accession Numbers:** Q9Y3B9  
**Gene Names:** RRP15  
**Peptide Sequence:** GVVQLFNAVQK  
**Total Number of Spectra:** 7  
**Number of Replicates (out of 8):** 7  
**Best Match Score:** 185.61  
**Best Match Posterior Error Probability:** 4.37E-10  
**Best Match Spectrum:**

**Scan number** 50417      **Raw file** A549-US-Mock-top20CID-Elite-2ug-B12  
**Method** ITMS; CID      **Genenames** RRP15

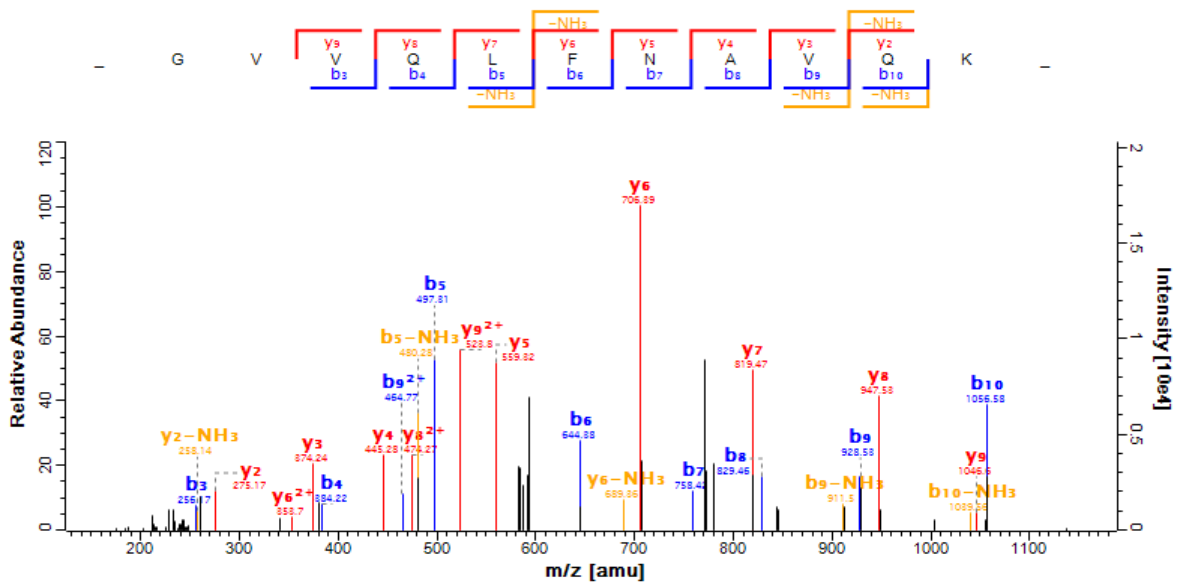

**Protein Group ID:** 5270

**Protein Accession Numbers:** Q9Y3D2

**Gene Names:** MSRB2

**Peptide Sequence:** GQAGGGGPGTGPGLGEAGSLATCELPLAK

**Total Number of Spectra:** 3

**Number of Replicates (out of 8):** 3

**Best Match Score:** 63.893

**Best Match Posterior Error Probability:** 0.00010306

**Best Match Spectrum:**

**Scan number** 58996      **Raw file** A549-US-WT-top20CID-Elite-2ug-B11  
**Method** ITMS; CID      **Genenames** MSRB2

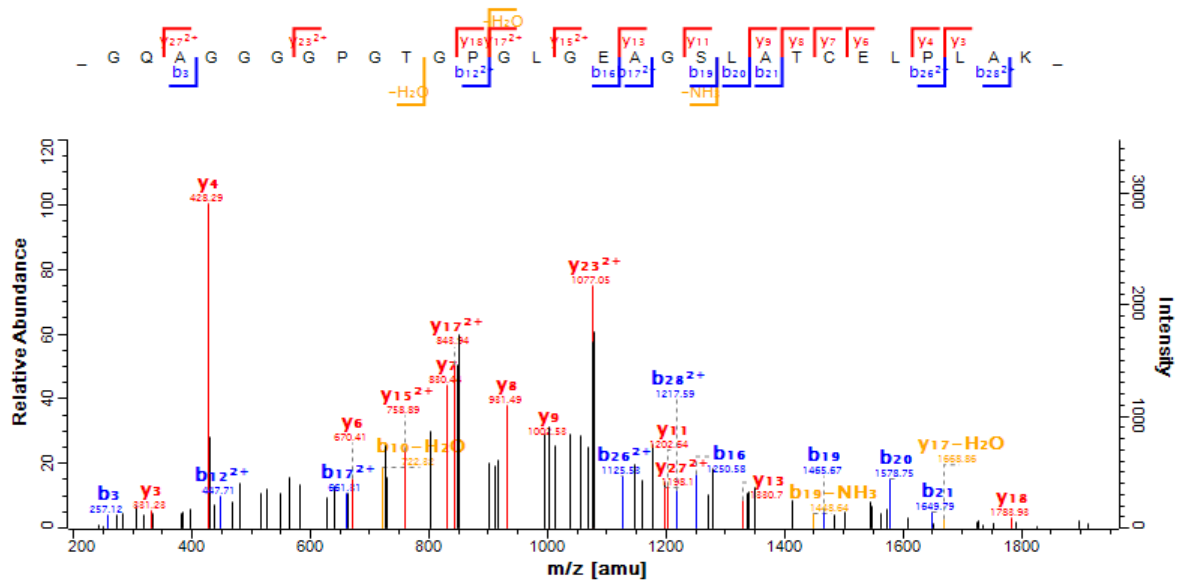

**Protein Group ID:** 5272  
**Protein Accession Numbers:** Q9Y3D5  
**Gene Names:** MRPS18C  
**Peptide Sequence:** NVQLLSQFVSPFTGCIYGR  
**Total Number of Spectra:** 18  
**Number of Replicates (out of 8):** 8  
**Best Match Score:** 187.39  
**Best Match Posterior Error Probability:** 2.14E-23  
**Best Match Spectrum:**

**Scan number** 84928      **Raw file** A549-US-WT-top20CID-Elite-2ug-B14  
**Method** ITMS; CID      **Genenames** MRPS18C

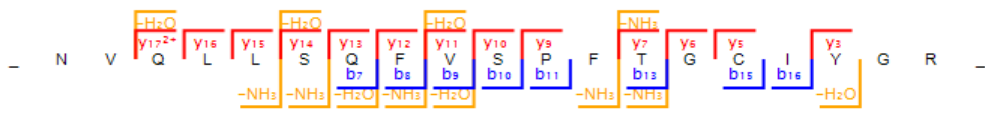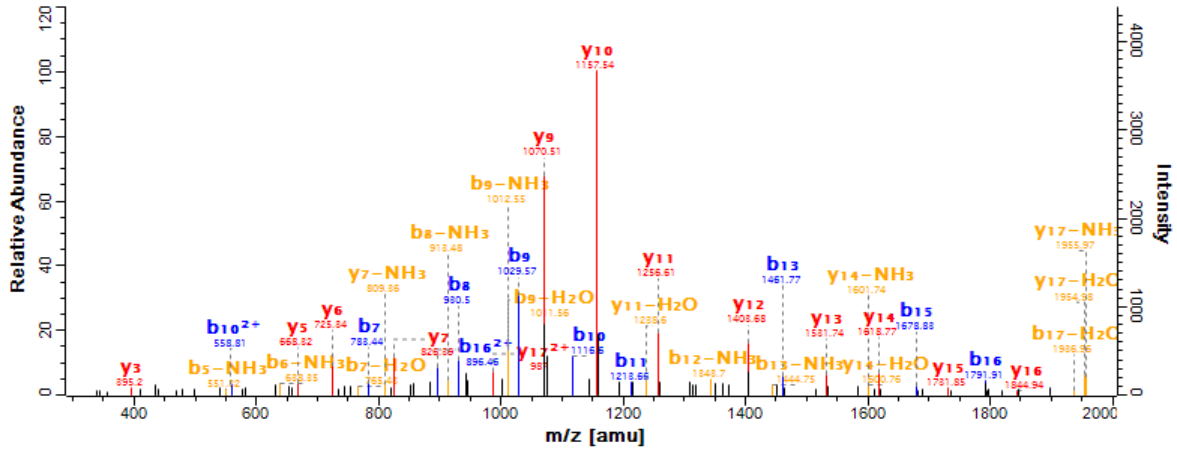

**Protein Group ID:** 5274  
**Protein Accession Numbers:** Q9Y3D8  
**Gene Names:** TAF9  
**Peptide Sequence:** MLLPNILLTGTPGVGK  
**Total Number of Spectra:** 10  
**Number of Replicates (out of 8):** 8  
**Best Match Score:** 170.78  
**Best Match Posterior Error Probability:** 4.68E-14  
**Best Match Spectrum:**

**Scan number** 76968      **Raw file** A549-US-Mock-top20CID-Elite-2ug-B13  
**Method** ITMS; CID      **Genenames** TAF9

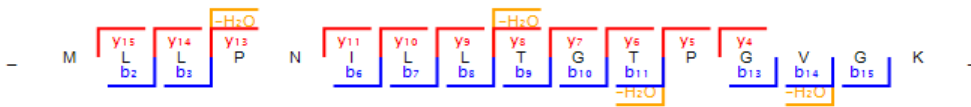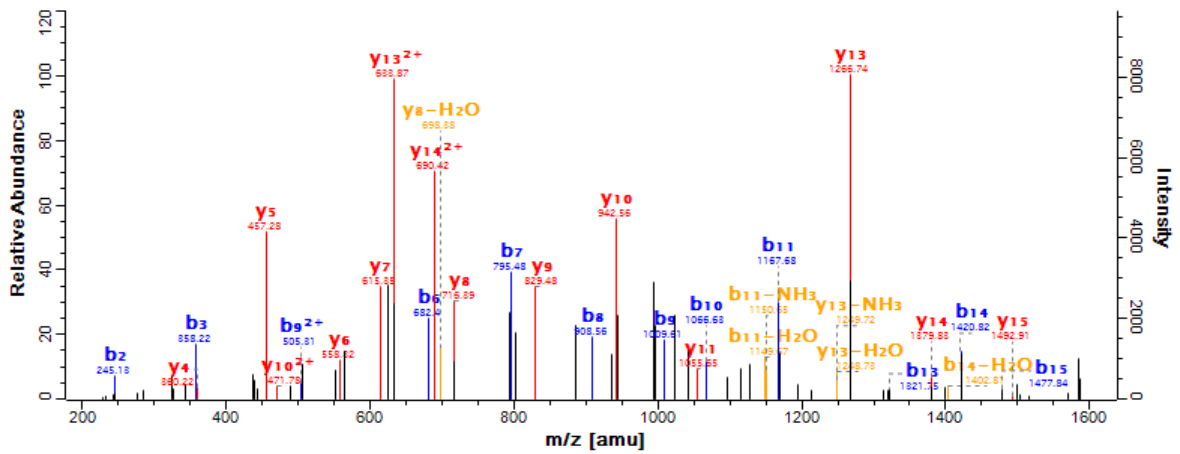

**Protein Group ID:** 5276

**Protein Accession Numbers:** Q9Y3E1; H3BTV7; H3BPM9

**Gene Names:** HDGFRP3

**Peptide Sequence:** GFNEGLWEINNPVG

**Total Number of Spectra:** 1

**Number of Replicates (out of 8):** 1

**Best Match Score:** 83.758

**Best Match Posterior Error Probability:** 0.0013463

**Best Match Spectrum:**

|                    |           |                  |                                   |
|--------------------|-----------|------------------|-----------------------------------|
| <b>Scan number</b> | 57352     | <b>Raw file</b>  | A549-US-WT-top20CID-Elite-2ug-B14 |
| <b>Method</b>      | ITMS; CID | <b>Genenames</b> | HDGFRP3                           |

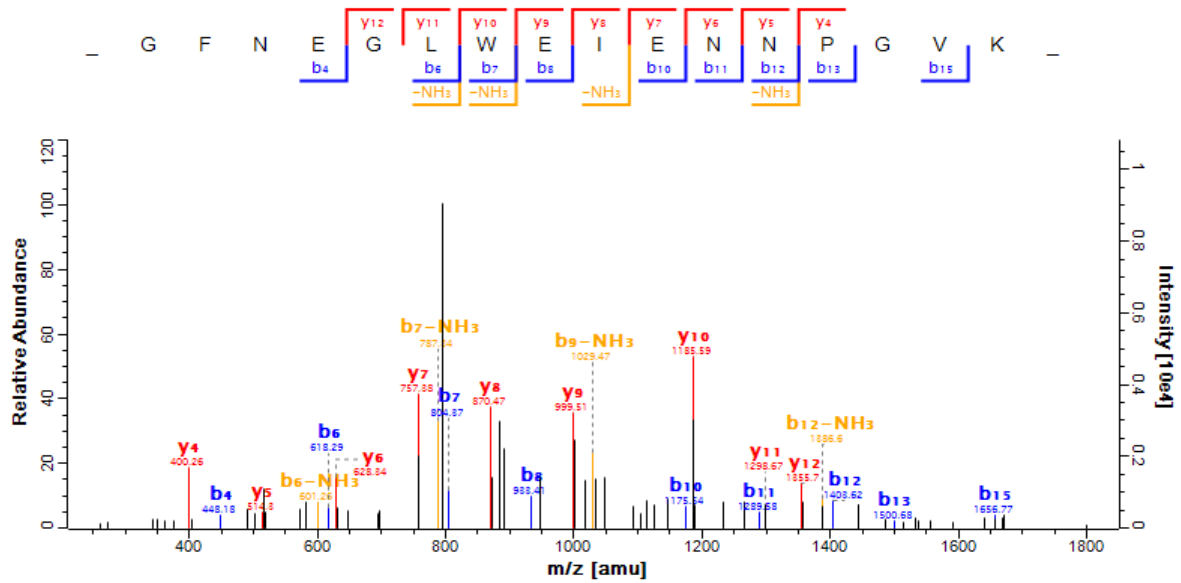

**Protein Group ID:** 5280

**Protein Accession Numbers:** Q9Y3I1; Q9Y3I1-2; Q9Y3I1-3

**Gene Names:** FBX07

**Peptide Sequence:** FDPVGPLPGNPILPGR

**Total Number of Spectra:** 4

**Number of Replicates (out of 8):** 4

**Best Match Score:** 109.07

**Best Match Posterior Error Probability:** 0.00010596

**Best Match Spectrum:**

|                    |           |                  |                                   |
|--------------------|-----------|------------------|-----------------------------------|
| <b>Scan number</b> | 63859     | <b>Raw file</b>  | A549-US-WT-top20CID-Elite-2ug-B11 |
| <b>Method</b>      | ITMS; CID | <b>Genenames</b> | FBX07                             |

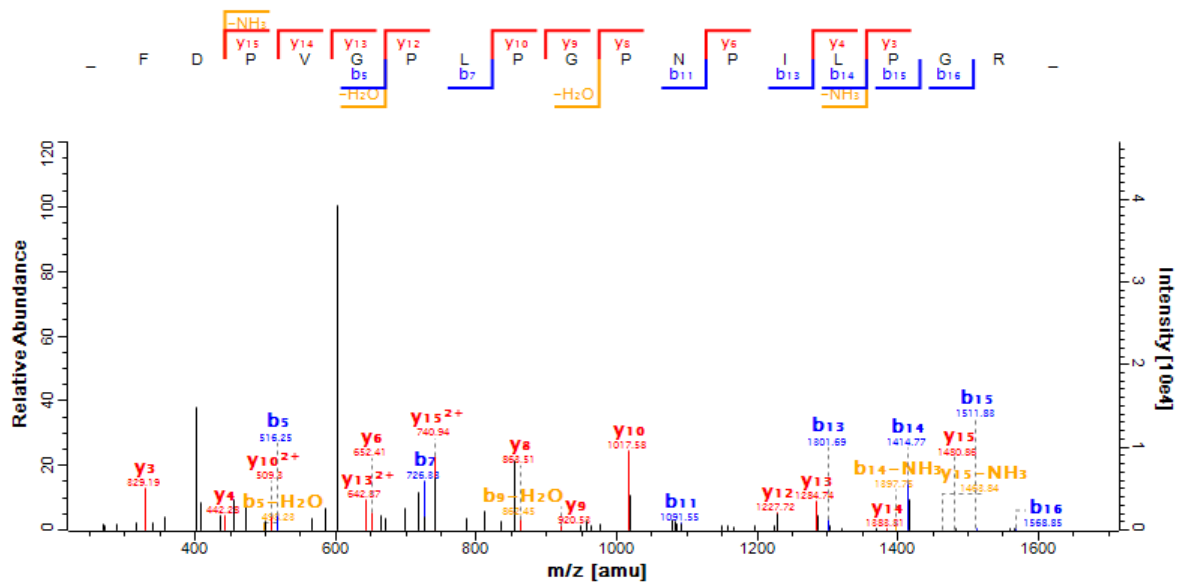



**Protein Group ID:** 5282  
**Protein Accession Numbers:** Q9Y3P4  
**Gene Names:** RHBDD3  
**Peptide Sequence:** GGPAHSEGPGPP  
**Total Number of Spectra:** 2  
**Number of Replicates (out of 8):** 2  
**Best Match Score:** 85.29  
**Best Match Posterior Error Probability:** 0.0021588  
**Best Match Spectrum:**

|                    |           |                  |                                   |
|--------------------|-----------|------------------|-----------------------------------|
| <b>Scan number</b> | 6484      | <b>Raw file</b>  | A549-US-WT-top20CID-Elite-2ug-B14 |
| <b>Method</b>      | ITMS; CID | <b>Genenames</b> | RHBDD3                            |

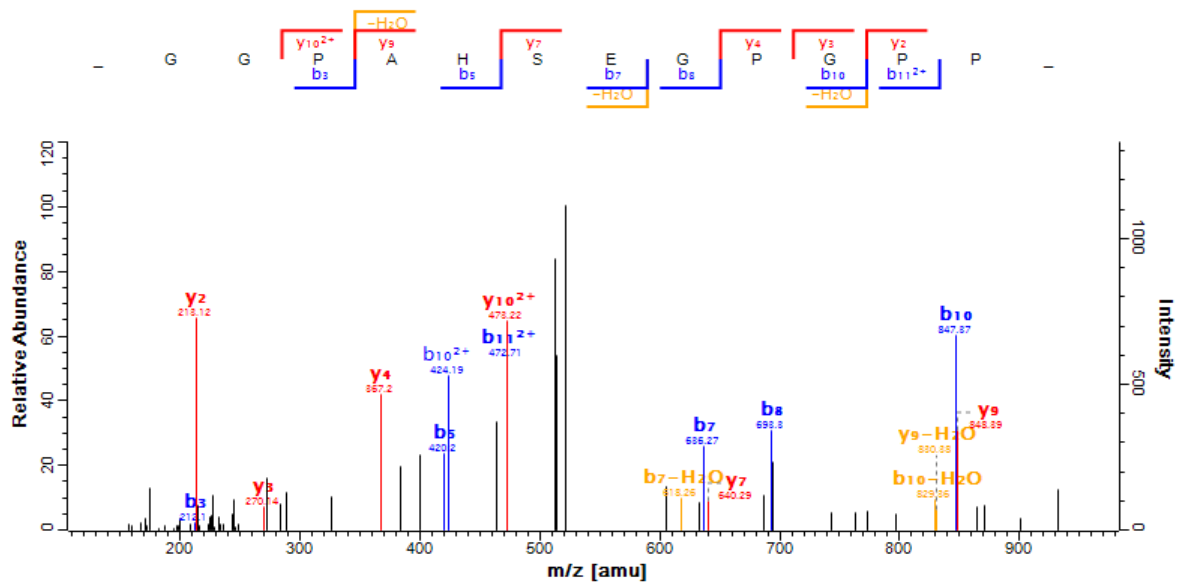

**Protein Group ID:** 5291

**Protein Accession Numbers:** Q9Y448; Q9Y448-2

**Gene Names:** SKAP

**Peptide Sequence:** QESTTDHMDSMMLLETLQEELK

**Total Number of Spectra:** 1

**Number of Replicates (out of 8):** 1

**Best Match Score:** 61.942

**Best Match Posterior Error Probability:** 0.0026576

**Best Match Spectrum:**

|                    |           |                  |                                     |
|--------------------|-----------|------------------|-------------------------------------|
| <b>Scan number</b> | 84824     | <b>Raw file</b>  | A549-US-Mock-top20CID-Elite-2ug-B13 |
| <b>Method</b>      | ITMS; CID | <b>Genenames</b> | SKAP                                |

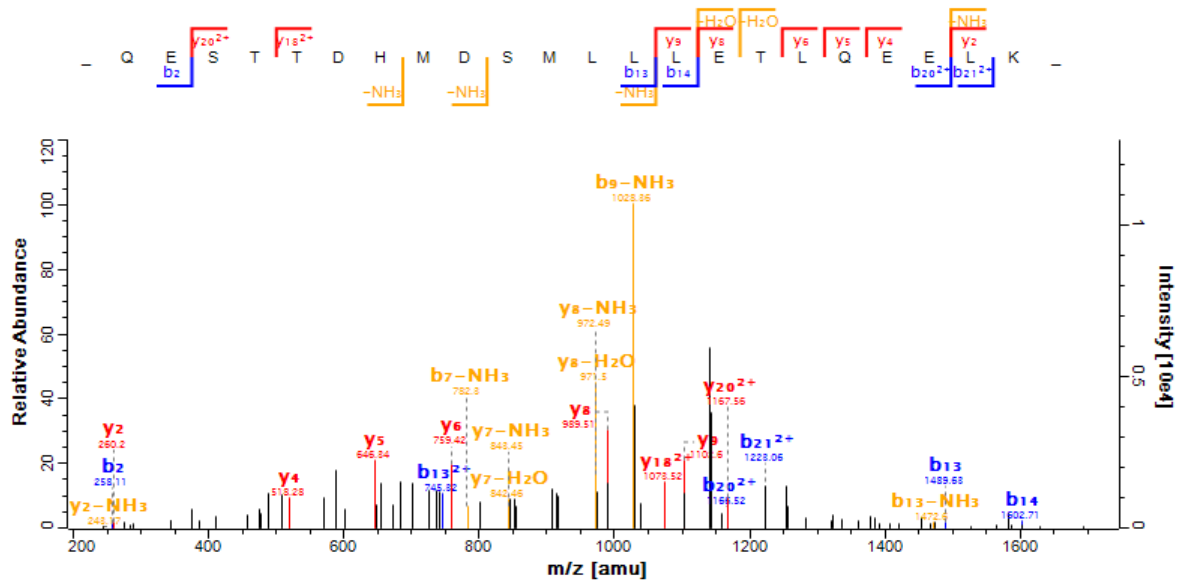

**Protein Group ID:** 5300

**Protein Accession Numbers:** Q9Y4H2

**Gene Names:** IRS2

**Peptide Sequence:** AAAAAAAAAVPSAGPAGPAP TSAAGR

**Total Number of Spectra:** 1

**Number of Replicates (out of 8):** 1

**Best Match Score:** 67.88

**Best Match Posterior Error Probability:** 0.00048812

**Best Match Spectrum:**

**Scan number** 26169      **Raw file** A549-US-Mock-top20CID-Elite-2ug-B13  
**Method** ITMS; CID      **Genenames** IRS2

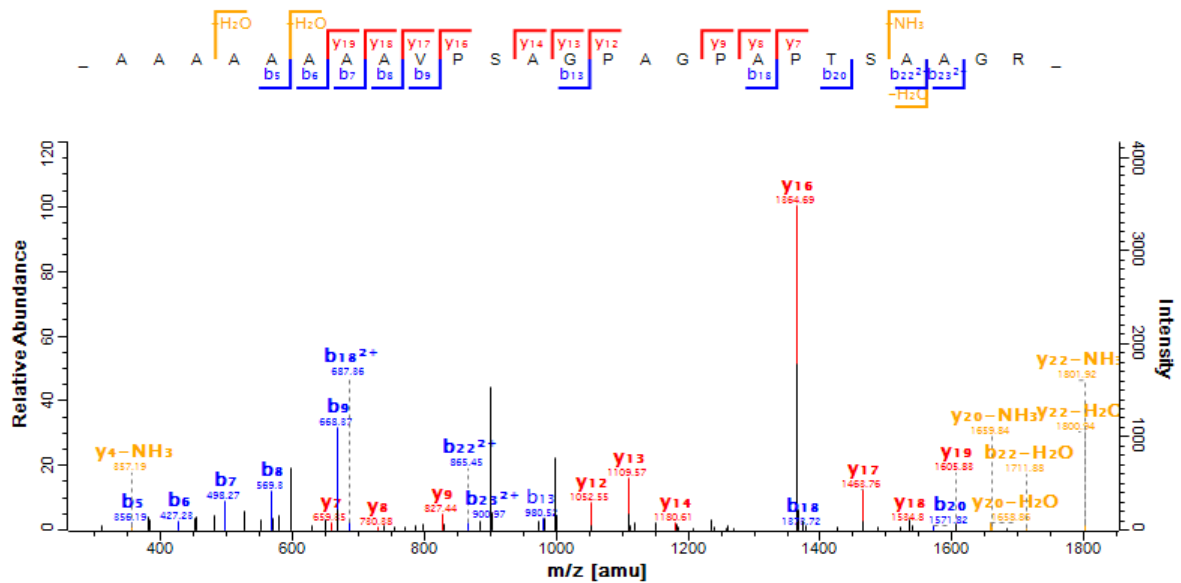

**Protein Group ID:** 5312  
**Protein Accession Numbers:** Q9Y584  
**Gene Names:** TIMM22  
**Peptide Sequence:** LLEPGSLGGIPSPAK  
**Total Number of Spectra:** 7  
**Number of Replicates (out of 8):** 7  
**Best Match Score:** 92.295  
**Best Match Posterior Error Probability:** 0.00066259  
**Best Match Spectrum:**

**Scan number** 48342      **Raw file** A549-US-WT-top20CID-Elite-2ug-B13  
**Method** ITMS; CID      **Genenames** TIMM22

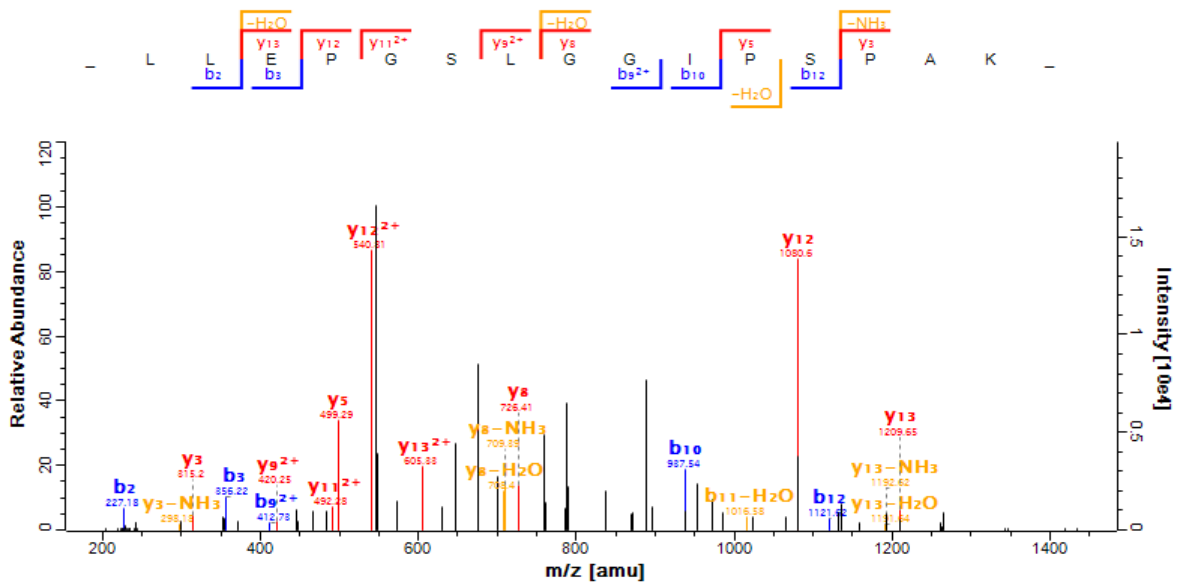

**Protein Group ID:** 5313

**Protein Accession Numbers:** Q9Y597; Q9Y597-2; Q9Y597-3

**Gene Names:** KCTD3

**Peptide Sequence:** GATGECNISR

**Total Number of Spectra:** 2

**Number of Replicates (out of 8):** 2

**Best Match Score:** 90.913

**Best Match Posterior Error Probability:** 0.0013828

**Best Match Spectrum:**

**Scan number** 4693      **Raw file** A549-US-Mock-top20CID-Elite-2ug-B11  
**Method** ITMS; CID      **Genenames** KCTD3

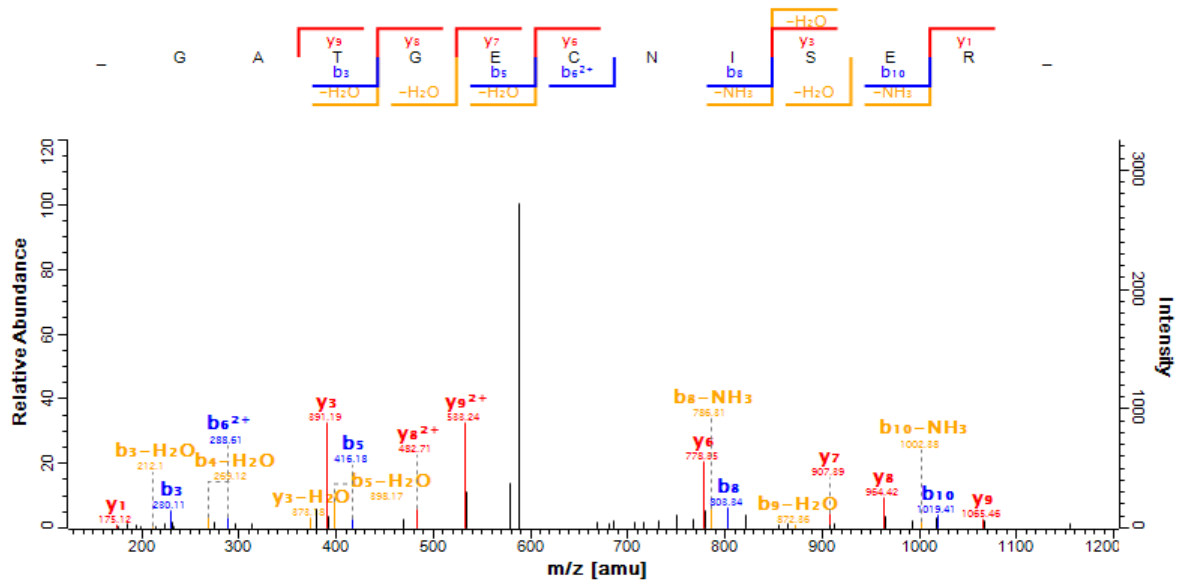

**Protein Group ID:** 5315  
**Protein Accession Numbers:** Q9Y5B0; Q9Y5B0-4  
**Gene Names:** CTDPI  
**Peptide Sequence:** VPAEGAPTAAVAEVR  
**Total Number of Spectra:** 4  
**Number of Replicates (out of 8):** 4  
**Best Match Score:** 94.487  
**Best Match Posterior Error Probability:** 0.00051249  
**Best Match Spectrum:**

**Scan number** 28196      **Raw file** A549-US-Mock-top20CID-Elite-2ug-B13  
**Method** ITMS; CID      **Genenames** CTDPI

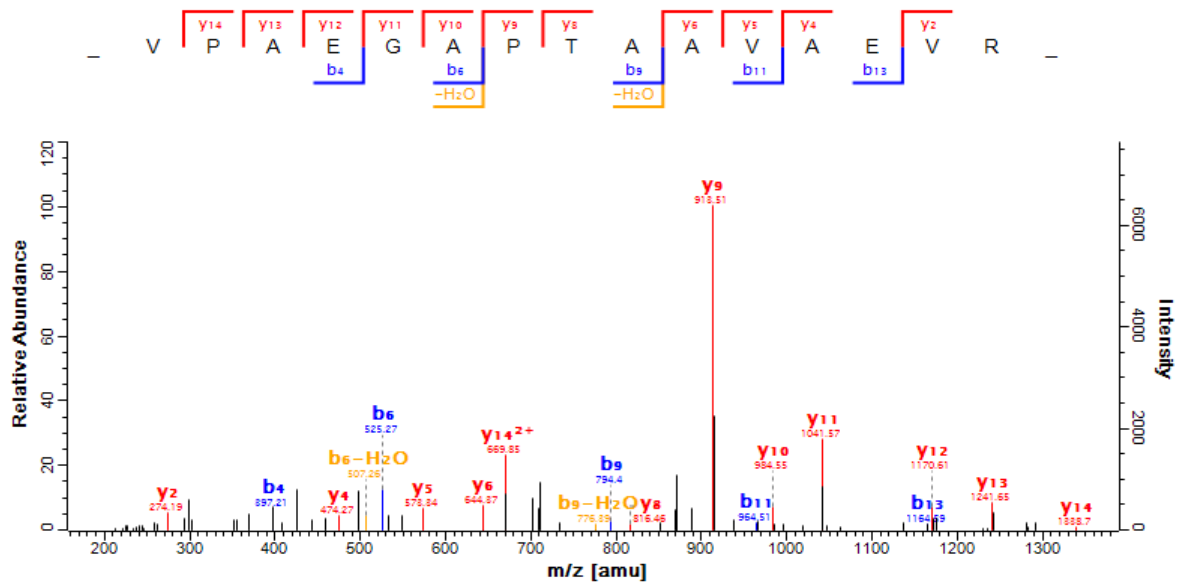

**Protein Group ID:** 5316

**Protein Accession Numbers:** Q9Y5B6; Q9Y5B6-2; Q9Y5B6-4; Q9Y5B6-3

**Gene Names:** GCFC1

**Peptide Sequence:** TGGAFSNALSSLNVLRLPGELIPDAAFIHAAR

**Total Number of Spectra:** 1

**Number of Replicates (out of 8):** 1

**Best Match Score:** 66.372

**Best Match Posterior Error Probability:** 0.0002344

**Best Match Spectrum:**

**Scan number** 81417      **Raw file** A549-US-WT-top20CID-Elite-2ug-B14  
**Method** ITMS; CID      **Genenames** GCFC1

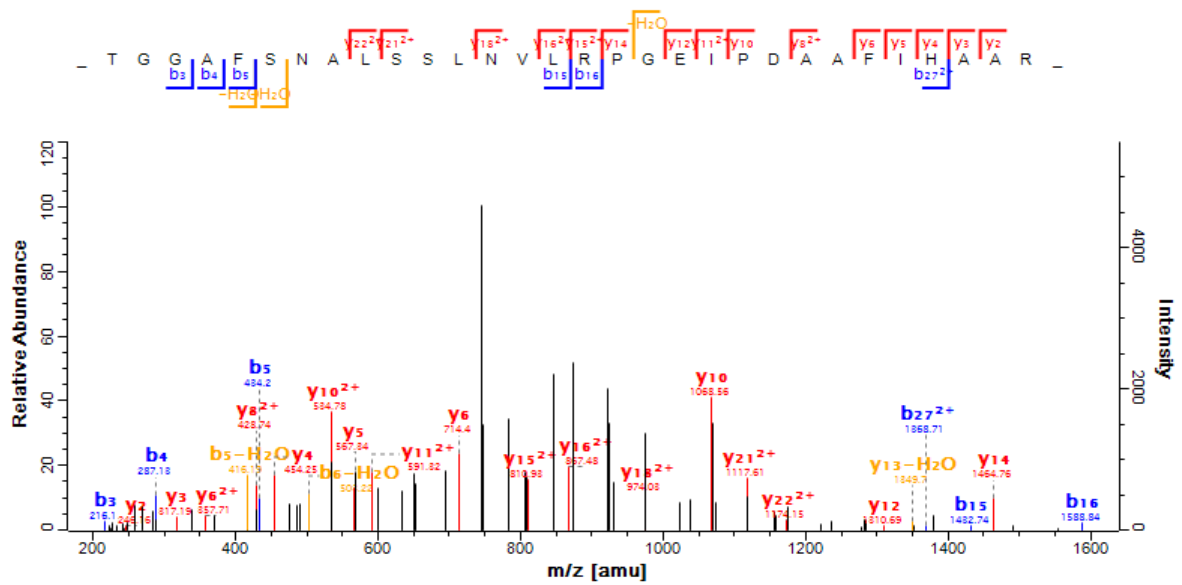

**Protein Group ID:** 5319  
**Protein Accession Numbers:** Q9Y5J5  
**Gene Names:** PHLDA3  
**Peptide Sequence:** SGGLQLWK  
**Total Number of Spectra:** 1  
**Number of Replicates (out of 8):** 1  
**Best Match Score:** 88.495  
**Best Match Posterior Error Probability:** 0.0039179  
**Best Match Spectrum:**

|                    |           |                  |                                     |
|--------------------|-----------|------------------|-------------------------------------|
| <b>Scan number</b> | 59752     | <b>Raw file</b>  | A549-US-Mock-top20CID-Elite-2ug-B12 |
| <b>Method</b>      | ITMS; CID | <b>Genenames</b> | PHLDA3                              |

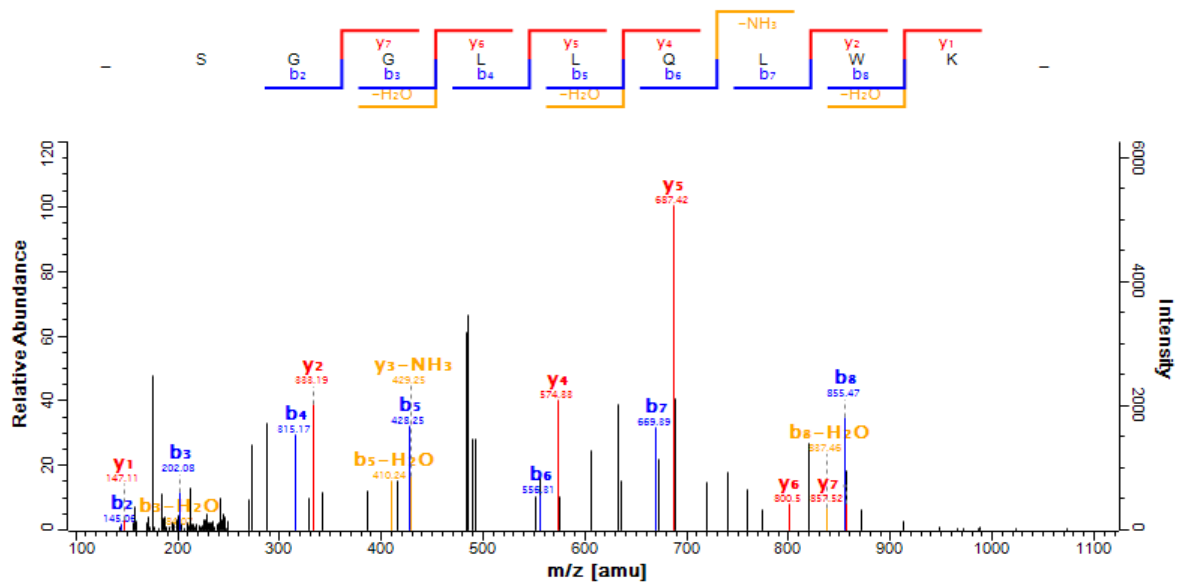



**Protein Group ID:** 5320  
**Protein Accession Numbers:** Q9Y5J7  
**Gene Names:** TIMM9  
**Peptide Sequence:** FQEYHIQQNEALAAK  
**Total Number of Spectra:** 2  
**Number of Replicates (out of 8):** 2  
**Best Match Score:** 132.51  
**Best Match Posterior Error Probability:** 3.01E-05  
**Best Match Spectrum:**

**Scan number** 29432      **Raw file** A549-US-Mock-top20CID-Elite-2ug-B12  
**Method** ITMS; CID      **Genenames** TIMM9

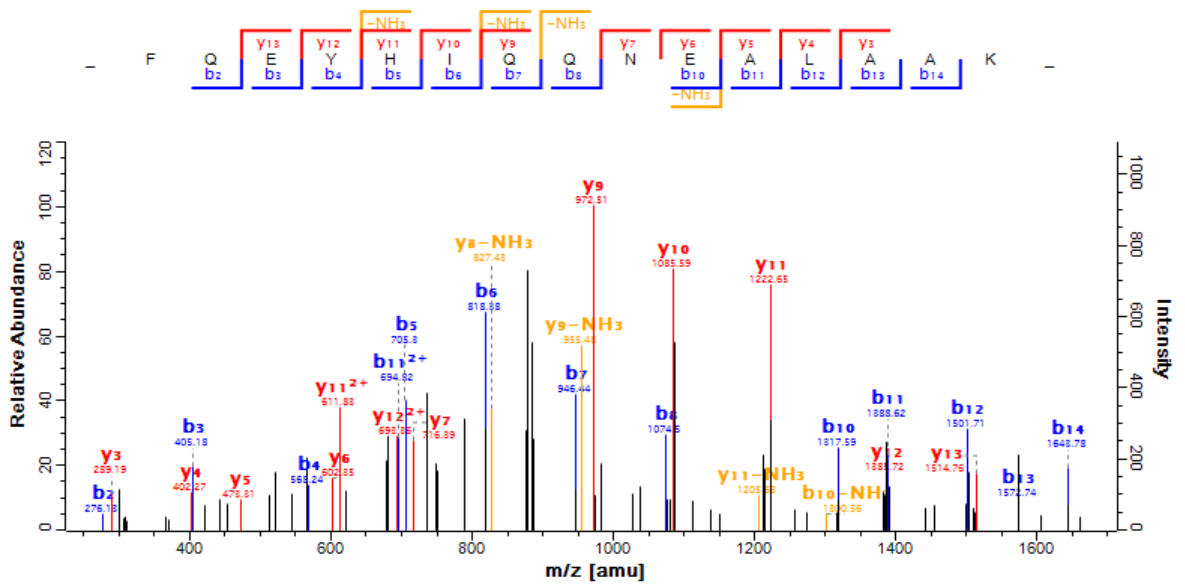

**Protein Group ID:** 5332  
**Protein Accession Numbers:** Q9Y5U9  
**Gene Names:** IER3IP1  
**Peptide Sequence:** NIGWGTDQGIGGGFGEEPGIK  
**Total Number of Spectra:** 3  
**Number of Replicates (out of 8):** 3  
**Best Match Score:** 162.42  
**Best Match Posterior Error Probability:** 6.77E-12  
**Best Match Spectrum:**

**Scan number** 59493      **Raw file** A549-US-WT-top20CID-Elite-2ug-B14  
**Method** ITMS; CID      **Genenames** IER3IP1

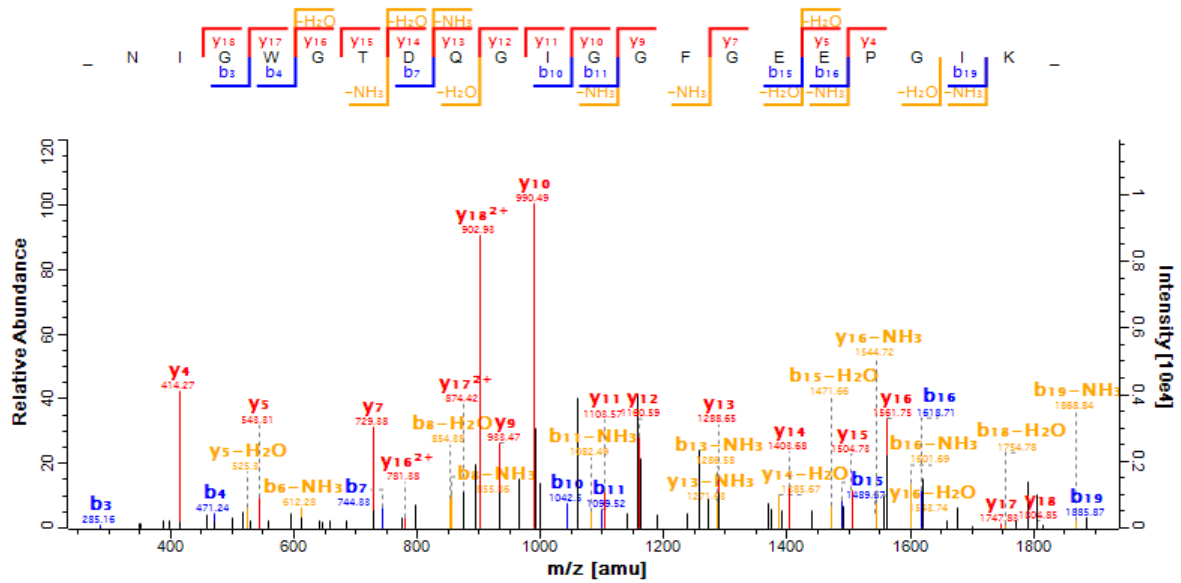

**Protein Group ID:** 5333  
**Protein Accession Numbers:** Q9Y5V3-2; Q9Y5V3  
**Gene Names:** MAGED1  
**Peptide Sequence:** APTADTQTQNVNQAK  
**Total Number of Spectra:** 7  
**Number of Replicates (out of 8):** 7  
**Best Match Score:** 157.2  
**Best Match Posterior Error Probability:** 1.96E-09  
**Best Match Spectrum:**

**Scan number** 4590      **Raw file** A549-US-WT-top20CID-Elite-2ug-B11  
**Method** ITMS; CID      **Genenames** MAGED1

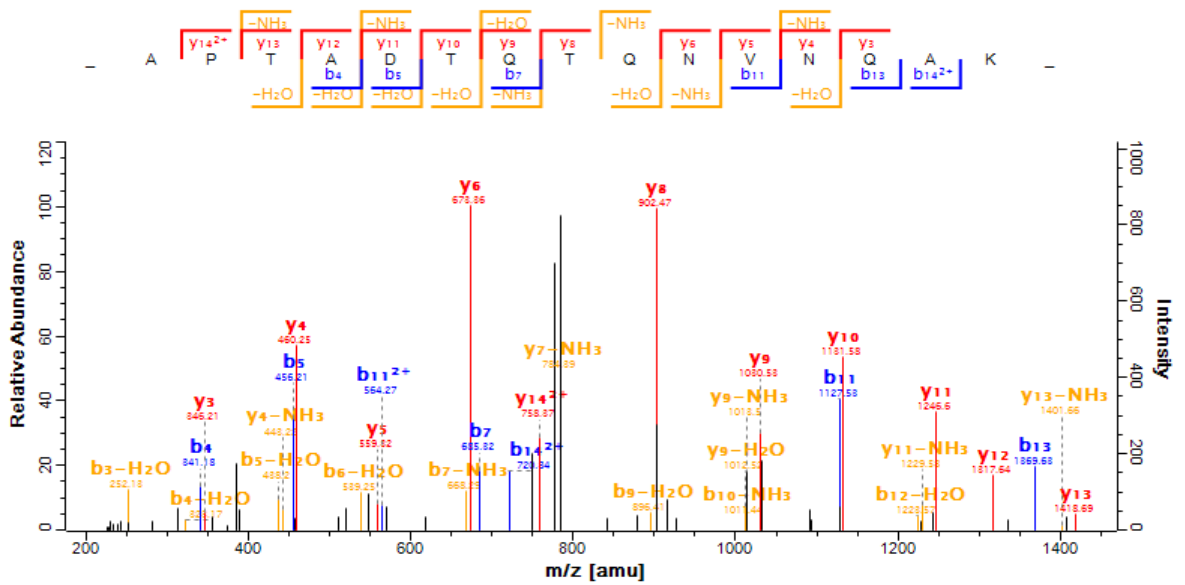

**Protein Group ID:** 5335

**Protein Accession Numbers:** Q9Y5X2

**Gene Names:** SNX8

**Peptide Sequence:** ELSAIGSDTTPLPSWAALNSSTWGLK

**Total Number of Spectra:** 1

**Number of Replicates (out of 8):** 1

**Best Match Score:** 57.802

**Best Match Posterior Error Probability:** 0.001323

**Best Match Spectrum:**

**Scan number** 84265      **Raw file** A549-US-WT-top20CID-Elite-2ug-B12  
**Method** ITMS; CID      **Genenames** SNX8

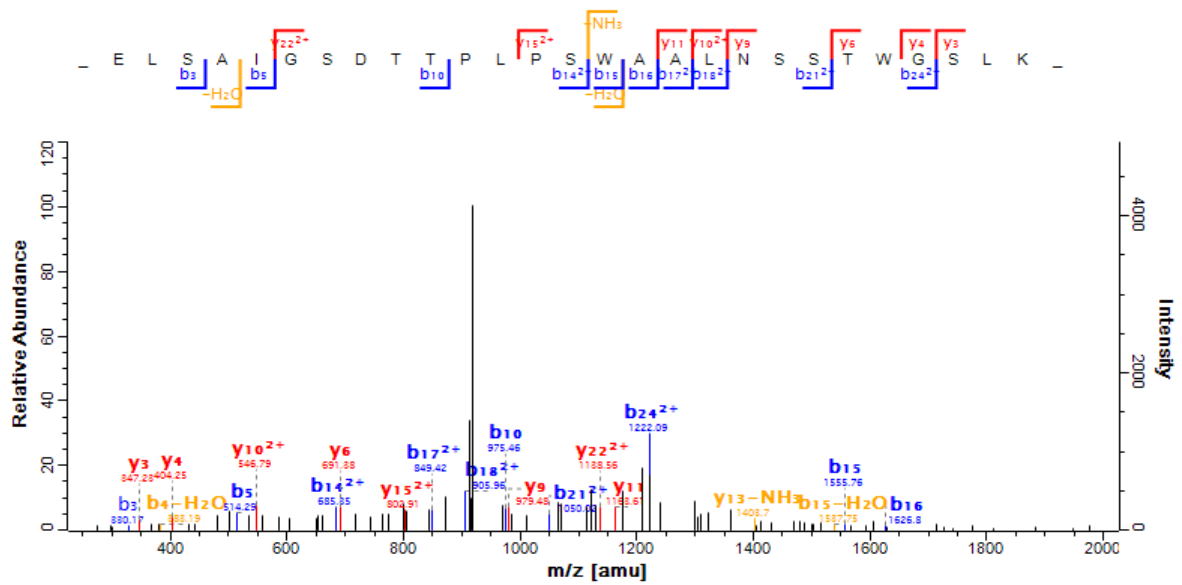

**Protein Group ID:** 5341  
**Protein Accession Numbers:** Q9Y619  
**Gene Names:** SLC25A15  
**Peptide Sequence:** LQTMYESGK  
**Total Number of Spectra:** 5  
**Number of Replicates (out of 8):** 5  
**Best Match Score:** 113.61  
**Best Match Posterior Error Probability:** 0.00021508  
**Best Match Spectrum:**

**Scan number** 28630      **Raw file** A549-US-Mock-top20CID-Elite-2ug-B13  
**Method** ITMS; CID      **Genenames** SLC25A15

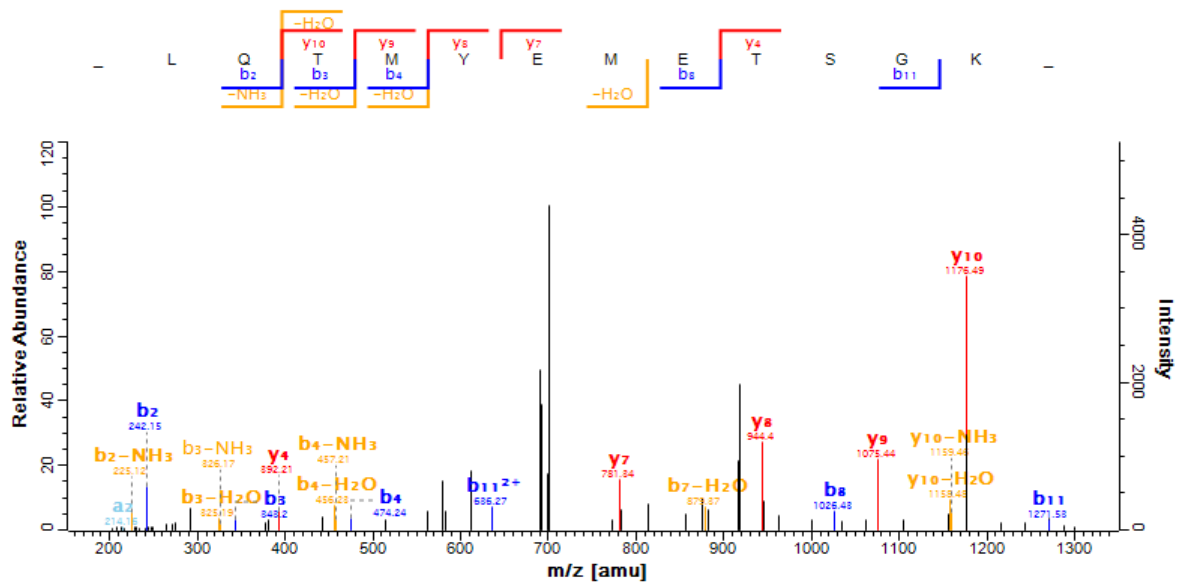

Supplement: supp_M114.041129_mcp.M114.041129-5.pdf [file supp_M114.041129_mcp.M114.041129-5.pdf]
