# Supplementary material
Source: PubMed Central journal article supplement (PMC4256481)

**Supplemental Fig. 2. Annotated spectra for differentially abundant protein groups (FDR less than 1%) identified by a single peptide in the in-solution protein IEF workflow.** The full list of differentially abundant protein groups are listed in supplemental Table 1. Where multiple spectra match the peptide sequence, the annotated spectrum corresponding to the best match is reported.

**Protein Group ID:** 229

**Protein Accession Numbers:** B4E1Z4; E7EVA3; E7ETN3; P00751; H7C5H1

**Gene Names:** CFB

**Peptide Sequence:** DFHINLFQVLSLWPK

**Total Number of Spectra:** 6

**Number of Replicates (out of 10):** 4

**Best Match Score:** 80.522

**Best Match Posterior Error Probability:** 0.0015959

**Best Match Spectrum:**

|                    |           |                  |                                      |
|--------------------|-----------|------------------|--------------------------------------|
| <b>Scan number</b> | 7960      | <b>Raw file</b>  | 20100927-KD-Batch4-Prt-OGE-WT-Frac16 |
| <b>Method</b>      | ITMS; CID | <b>Genenames</b> | CFB                                  |

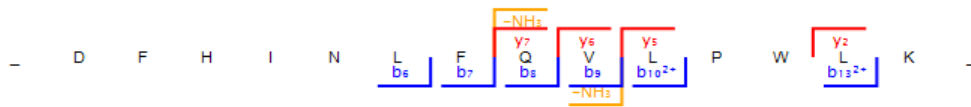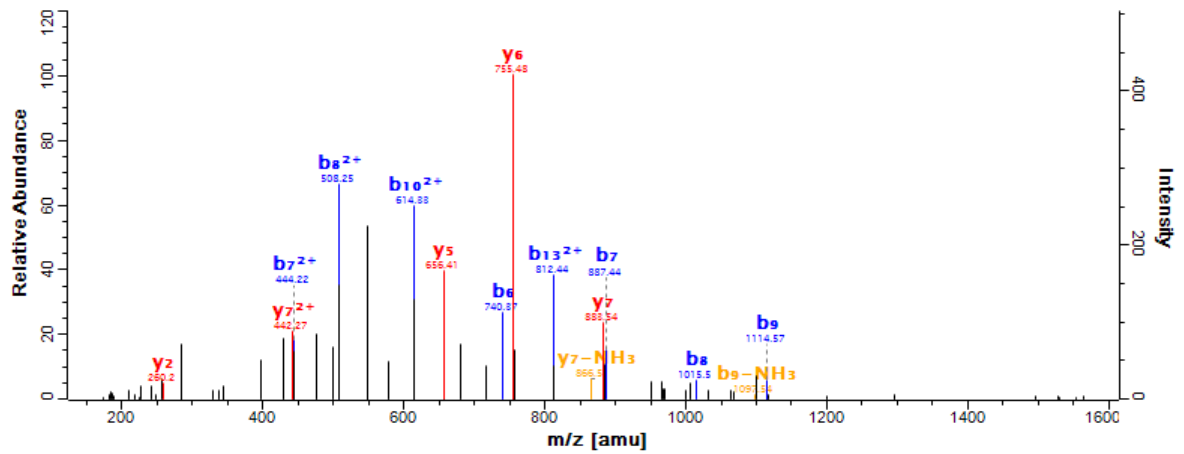

Supplement: supp_M114.041129_mcp.M114.041129-2.pdf [file supp_M114.041129_mcp.M114.041129-2.pdf]
