# Supplementary material
Source: PubMed Central journal article supplement (PMC4256481)

Early phase of RNA virus infection

1. Predominant induction of IFN $\alpha$  and IFN $\beta$
2. Induction of cytokines

Late phase of RNA virus infection

1. Elevation of IRF-7 expression by type I IFNs
2. Further induction of the robust IFN $\alpha$  group and IFN $\beta$

Infection of cytokines and type I IFNs in infection

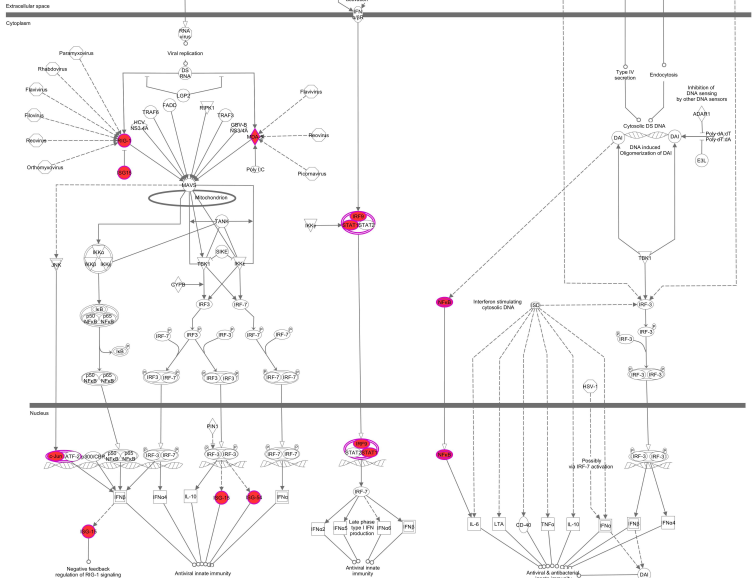

Supplement: supp_M114.041129_mcp.M114.041129-10.pdf [file supp_M114.041129_mcp.M114.041129-10.pdf]
