# Supplementary material
Source: PubMed Central journal article supplement (PMC4256481)
Supplement: supp_M114.041129_mcp.M114.041129-16.pdf [file supp_M114.041129_mcp.M114.041129-16.pdf]

| <input type="checkbox"/> | Upstream Regulator | Log Ratio | Molecule Type        | Predicted Activation | Activation z-score | Notes | p-value of overlap | Target molecules in network | Mechanistic Network |
|--------------------------|--------------------|-----------|----------------------|----------------------|--------------------|-------|--------------------|-----------------------------|---------------------|
| <input type="checkbox"/> | IFNG               |           | cytokine             | Activated            | 8.509              | bias  | 2.20E-51           | ↑B2M, ... all 83            | 130 (16)            |
| <input type="checkbox"/> | IRF7               |           | transcription regula | Activated            | 6.336              | bias  | 1.93E-49           | ↑BCL2L13, ... all 42        | 93 (10)             |
| <input type="checkbox"/> | IFNA2              |           | cytokine             | Activated            | 6.457              | bias  | 7.31E-49           | ↑B2M, ... all 46            | 121 (17)            |
| <input type="checkbox"/> | IFNL1              |           | cytokine             | Activated            | 5.682              | bias  | 7.91E-48           | ↑BST2, ... all 33           | 112 (13)            |
| <input type="checkbox"/> | MAPK1              |           | kinase               | Inhibited            | -5.592             |       | 1.39E-45           | ↑BST2, ... all 49           | 125 (17)            |
| <input type="checkbox"/> | lipopolysaccharide |           | chemical drug        | Activated            | 7.905              | bias  | 3.03E-45           | ↑ABCC1, ... all 87          | 141 (16)            |
| <input type="checkbox"/> | poly rI:rC-RNA     |           | chemical reagent     | Activated            | 6.424              | bias  | 4.51E-45           | ↑B2M, ... all 52            | 140 (18)            |
| <input type="checkbox"/> | Interferon alpha   |           | group                | Activated            | 5.784              | bias  | 1.84E-42           | ↑APOL2, ... all 47          | 111 (16)            |
| <input type="checkbox"/> | TNF                |           | cytokine             | Activated            | 7.755              | bias  | 5.57E-42           | ↑ABCC1, ... all 82          | 133 (17)            |
| <input type="checkbox"/> | STAT3              |           | transcription regula | Activated            | 3.386              | bias  | 3.41E-33           | ↑BST2, ... all 43           | 127 (21)            |
| <input type="checkbox"/> | IRF1               |           | transcription regula | Activated            | 4.674              | bias  | 1.55E-31           | ↑B2M, ... all 30            | 127 (17)            |
| <input type="checkbox"/> | NKX2-3             |           | transcription regula | Inhibited            | -5.741             |       | 6.13E-31           | ↑C19orf66, ... all 33       |                     |
| <input type="checkbox"/> | OSM                |           | cytokine             | Activated            | 4.710              |       | 1.63E-28           | ↑ABCC1, ... all 43          | 113 (20)            |
| <input type="checkbox"/> | CD40LG             |           | cytokine             | Activated            | 3.683              | bias  | 1.07E-26           | ↑AKAP2, ... all 37          | 129 (18)            |
| <input type="checkbox"/> | TRIM24             |           | transcription regula | Inhibited            | -4.352             | bias  | 4.70E-26           | ↑BST2, ... all 23           | 66 (7)              |
| <input type="checkbox"/> | STAT1              | ↑1.000    | transcription regula | Activated            | 4.784              | bias  | 7.18E-26           | ↑B2M, ... all 31            | 126 (16)            |
| <input type="checkbox"/> | PAF1               |           | other                | Activated            | 4.243              | bias  | 3.83E-25           | ↑CCL5, ... all 18           |                     |
| <input type="checkbox"/> | IRF3               |           | transcription regula | Activated            | 4.216              | bias  | 2.37E-23           | ↑B2M, ... all 25            | 87 (11)             |
| <input type="checkbox"/> | trefoilin          |           | chemical-endogeno    | Activated            | 5.170              |       | 7.37E-22           | ↑ANXA2, ... all 56          | 133 (15)            |
| <input type="checkbox"/> | IRF5               |           | transcription regula | Activated            | 4.172              | bias  | 1.45E-21           | ↑CCL5, ... all 18           | 70 (14)             |
| <input type="checkbox"/> | IL1B               |           | cytokine             | Activated            | 5.255              | bias  | 1.83E-21           | ↑CASP4, ... all 43          | 118 (15)            |
| <input type="checkbox"/> | EIF2AK2            | ↑1.000    | kinase               | Activated            | 4.202              | bias  | 2.23E-21           | ↑DDX58, ... all 19          | 87 (11)             |
| <input type="checkbox"/> | IFNAR1             |           | transmembrane rec    | Activated            | 2.576              | bias  | 3.51E-21           | ↑B2M, ... all 20            | 131 (17)            |
| <input type="checkbox"/> | IL1RN              |           | cytokine             | Inhibited            | -4.522             | bias  | 4.63E-21           | ↑CTSS, ... all 21           | 117 (12)            |
| <input type="checkbox"/> | IRF2               |           | transcription regula | Inhibited            | -2.335             |       | 5.38E-21           | ↑B2M, ... all 17            | 74 (9)              |
| <input type="checkbox"/> | IFNB1              |           | cytokine             | Activated            | 4.139              | bias  | 1.15E-19           | ↑BST2, ... all 26           | 110 (17)            |
| <input type="checkbox"/> | TP53               |           | transcription regula |                      | 1.814              |       | 2.80E-19           | ↑ABCC1, ... all 50          | 108 (16)            |
| <input type="checkbox"/> | SB203580           |           | chemical-kinase inh  | Inhibited            | -4.811             | bias  | 8.88E-19           | ↑BST2, ... all 28           | 133 (22)            |
| <input type="checkbox"/> | TCR                |           | complex              | Activated            | 2.133              | bias  | 1.27E-18           | ↑CCL5, ... all 26           | 97 (16)             |
| <input type="checkbox"/> | TLR3               |           | transmembrane rec    | Activated            | 3.658              | bias  | 2.99E-18           | ↑CCL5, ... all 24           | 85 (12)             |
| <input type="checkbox"/> | Ifn                |           | group                | Activated            | 4.142              | bias  | 8.03E-18           | ↑B2M, ... all 18            | 115 (17)            |
| <input type="checkbox"/> | RELA               |           | transcription regula | Activated            | 3.808              | bias  | 1.07E-17           | ↑B2M, ... all 27            | 118 (17)            |
| <input type="checkbox"/> | TGM2               | ↑1.000    | enzyme               | Activated            | 4.785              | bias  | 1.51E-17           | ↑DDX60, ... all 23          |                     |
| <input type="checkbox"/> | DDX58              | ↑1.000    | enzyme               | Activated            | 2.953              | bias  | 2.06E-17           | ↑CCL5, ... all 14           | 82 (14)             |
| <input type="checkbox"/> | IL6                |           | cytokine             | Activated            | 4.253              | bias  | 3.84E-17           | ↑ABCC1, ... all 35          | 125 (24)            |
| <input type="checkbox"/> | MAVS               |           | other                | Activated            | 3.712              | bias  | 6.89E-17           | ↑CCL5, ... all 14           | 82 (12)             |
| <input type="checkbox"/> | IFNLR1             |           | transmembrane rec    |                      |                    |       | 1.34E-16           | ↑CCL5, ... all 13           | 112 (13)            |
| <input type="checkbox"/> | TGFB1              |           | growth factor        |                      | 1.988              |       | 1.98E-16           | ↑AKR1C1, ... all 53         | 92 (19)             |
| <input type="checkbox"/> | IFN Beta           |           | group                | Activated            | 3.410              | bias  | 4.16E-16           | ↑CXCL1, ... all 17          | 101 (16)            |
| <input type="checkbox"/> | TICAM1             |           | other                | Activated            | 4.170              | bias  | 6.94E-16           | ↑CASP4, ... all 18          | 85 (17)             |
| <input type="checkbox"/> | TNFSF10            |           | cytokine             | Activated            | 3.208              |       | 8.27E-16           | ↑EIF2AK2, ... all 15        | 130 (21)            |
| <input type="checkbox"/> | PARP9              | ↑1.000    | other                | Activated            | 2.985              | bias  | 5.57E-15           | ↑HLA-E, ... all 9           |                     |
| <input type="checkbox"/> | SOC31              |           | other                | Inhibited            | -3.242             | bias  | 8.48E-15           | ↑DDX58, ... all 16          | 130 (20)            |
| <input type="checkbox"/> | camptothecin       |           | chemical toxicant    | Activated            | 3.391              |       | 1.03E-14           | ↑AKAP2, ... all 31          | 95 (18)             |
| <input type="checkbox"/> | stallimycin        |           | chemical drug        | Activated            | 3.416              | bias  | 1.10E-14           | ↑IFI16, ... all 12          | 102 (11)            |
| <input type="checkbox"/> | IFN type 1         |           | group                | Activated            | 2.841              | bias  | 1.10E-14           | ↑BST2, ... all 12           | 130 (17)            |
| <input type="checkbox"/> | NFKB(complex)      |           | complex              | Activated            | 4.889              | bias  | 1.16E-14           | ↑CASP4, ... all 30          | 119 (17)            |
| <input type="checkbox"/> | salmonella minneso |           | chemical-endogeno    | Activated            | 3.818              | bias  | 1.26E-14           | ↑CASP4, ... all 15          | 96 (19)             |
| <input type="checkbox"/> | U0126              |           | chemical-kinase inh  | Inhibited            | -2.941             | bias  | 2.09E-14           | ↑ARHGFE2, ... all 27        | 94 (21)             |
| <input type="checkbox"/> | bromodeoxyuridine  |           | chemical drug        | Activated            | 3.416              | bias  | 9.11E-14           | ↑IFI16, ... all 12          | 102 (11)            |
| <input type="checkbox"/> | STAT2              |           | transcription regula | Activated            | 2.935              | bias  | 2.51E-13           | ↑GBP1, ... all 10           | 114 (14)            |
| <input type="checkbox"/> | IFNA1/IFNA13       |           | cytokine             | Activated            | 3.010              | bias  | 4.37E-13           | ↑EIF2AK2, ... all 12        | 115 (17)            |
| <input type="checkbox"/> | JAK1               |           | kinase               | Activated            | 3.098              | bias  | 1.30E-12           | ↑EIF2AK2, ... all 10        | 86 (13)             |
| <input type="checkbox"/> | KRAS               |           | enzyme               |                      | -0.240             |       | 1.95E-12           | ↑AKR1B10, ... all 21        | 114 (9)             |
| <input type="checkbox"/> | NLR5               |           | transcription regula | Activated            | 2.786              | bias  | 2.29E-12           | ↑B2M, ... all 8             |                     |
| <input type="checkbox"/> | HRAS               |           | enzyme               | Activated            | 2.658              | bias  | 2.81E-12           | ↑AKAP2, ... all 27          | 106 (16)            |
| <input type="checkbox"/> | SASH1              |           | other                | Activated            | 3.464              | bias  | 2.95E-12           | ↑CMPK2, ... all 12          |                     |
| <input type="checkbox"/> | SAMSN1             |           | other                | Activated            | 3.051              | bias  | 3.36E-12           | ↑CMPK2, ... all 13          |                     |
| <input type="checkbox"/> | ERBB2              |           | kinase               |                      | 0.339              | bias  | 4.50E-12           | ↑ANXA2, ... all 28          | 92 (17)             |
| <input type="checkbox"/> | TLR4               |           | transmembrane rec    | Activated            | 3.189              | bias  | 4.55E-12           | ↑BCL10, ... all 20          | 94 (15)             |
| <input type="checkbox"/> | sirolimus          |           | chemical drug        | Inhibited            | -2.309             | bias  | 4.64E-12           | ↑B2M, ... all 23            | 100 (23)            |
| <input type="checkbox"/> | dexamethasone      |           | chemical drug        |                      | -1.867             |       | 4.88E-12           | ↑ABCC1, ... all 45          | 100 (19)            |
| <input type="checkbox"/> | GAPDH              |           | enzyme               | Inhibited            | -2.158             | bias  | 1.20E-11           | ↑CXCL1, ... all 9           | 38 (3)              |
| <input type="checkbox"/> | NLRP12             |           | other                |                      | 1.456              | bias  | 1.20E-11           | ↑CASP1, ... all 9           | 60 (7)              |
| <input type="checkbox"/> | IFNAR2             |           | transmembrane rec    | Activated            | 2.828              | bias  | 1.62E-11           | ↑HERC5, ... all 8           | 63 (8)              |
| <input type="checkbox"/> | 5-O-mycoly-beta-a  |           | chemical-endogeno    | Activated            | 3.422              | bias  | 2.71E-11           | ↑CXCL1, ... all 12          | 119 (12)            |
| <input type="checkbox"/> | MYD88              |           | other                | Activated            | 3.573              | bias  | 4.25E-11           | ↑BCL10, ... all 17          | 95 (15)             |
| <input type="checkbox"/> | JUN                | ↑1.000    | transcription regula |                      | 0.654              | bias  | 7.14E-11           | ↑ANXA2, ... all 21          | 91 (18)             |

| <input type="checkbox"/> | Upstream Regulator        | Log Ratio | Molecule Type           | Predicted Activation | Activation z-score | Notes | p-value of over... | Target molecules in... | Mechanistic Net... |
|--------------------------|---------------------------|-----------|-------------------------|----------------------|--------------------|-------|--------------------|------------------------|--------------------|
| <input type="checkbox"/> | CHUK                      |           | kinase                  | Activated            | 3.654              | bias  | 7.84E-11           | ↑CASP4, ...all 16      | 81 (13)            |
| <input type="checkbox"/> | paclitaxel                |           | chemical drug           | Activated            | 2.587              | bias  | 8.10E-11           | ↑ARHGEF2, ...all 18    | 109 (20)           |
| <input type="checkbox"/> | epigallocatechin-gal...   |           | chemical drug           | Inhibited            | -2.601             | bias  | 1.63E-10           | ↑CASP1, ...all 16      | 105 (18)           |
| <input type="checkbox"/> | LY294002                  |           | chemical-kinase inh...  | Inhibited            | -3.039             | bias  | 1.68E-10           | ↑ABCC1, ...all 23      | 104 (22)           |
| <input type="checkbox"/> | ERK1/2                    |           | group                   | Activated            | 3.482              | bias  | 2.13E-10           | ↑AKR1B10, ...all 17    | 99 (19)            |
| <input type="checkbox"/> | IL27                      |           | cytokine                | Activated            | 2.811              | bias  | 2.15E-10           | ↑B2M, ...all 12        | 132 (19)           |
| <input type="checkbox"/> | beta-estradiol            |           | chemical-endogeno...    |                      | 1.016              | bias  | 2.16E-10           | ↑BCL10, ...all 43      | 87 (18)            |
| <input type="checkbox"/> | decitabine                |           | chemical drug           | Activated            | 3.219              | bias  | 2.26E-10           | ↑ABCC1, ...all 22      | 111 (15)           |
| <input type="checkbox"/> | PD98059                   |           | chemical-kinase inh...  | Inhibited            | -3.113             | bias  | 2.35E-10           | ↑CCL5, ...all 24       | 72 (19)            |
| <input type="checkbox"/> | hydrogen peroxide         |           | chemical-endogeno...    | Activated            | 3.358              | bias  | 4.60E-10           | ↑AKR1C1, ...all 21     | 106 (20)           |
| <input type="checkbox"/> | E. coli B4 lipopolysac... |           | chemical toxicant       | Activated            | 2.759              | bias  | 4.72E-10           | ↑CASP7, ...all 17      | 105 (19)           |
| <input type="checkbox"/> | GF11                      |           | transcription regula... | Inhibited            | -3.317             | bias  | 4.87E-10           | ↑CASP1, ...all 11      | 104 (12)           |
| <input type="checkbox"/> | 3,3'-diindolylmethan...   |           | chemical drug           |                      | 1.475              |       | 5.15E-10           | ↑HLA-A, ...all 9       | 106 (12)           |
| <input type="checkbox"/> | NFKBIA                    |           | transcription regula... | Activated            | 2.635              |       | 5.48E-10           | ↑CASP4, ...all 21      | 95 (17)            |
| <input type="checkbox"/> | ANGPT2                    |           | growth factor           | Activated            | 2.909              | bias  | 8.07E-10           | ↑ABCC1, ...all 12      | 101 (18)           |
| <input type="checkbox"/> | NR3C1                     |           | ligand-dependent n...   |                      | -1.502             |       | 9.13E-10           | ↓AMIGO2, ...all 25     | 125 (19)           |
| <input type="checkbox"/> | DOCK8                     |           | other                   | Activated            | 3.162              | bias  | 9.77E-10           | ↑CMPK2, ...all 10      |                    |
| <input type="checkbox"/> | IL1                       |           | group                   | Activated            | 4.107              | bias  | 1.03E-09           | ↑AKR1C1, ...all 18     | 93 (18)            |
| <input type="checkbox"/> | phorbol myristate ac...   |           | chemical drug           | Activated            | 4.550              | bias  | 1.18E-09           | ↑AKR1B10, ...all 31    | 65 (16)            |
| <input type="checkbox"/> | 2-aminopurine             |           | chemical reagent        | Inhibited            | -2.605             | bias  | 1.34E-09           | ↑CXCL1, ...all 7       | 37 (3)             |
| <input type="checkbox"/> | IKBKE                     |           | kinase                  | Activated            | 3.905              | bias  | 1.41E-09           | ↑CCL5, ...all 16       | 81 (13)            |
| <input type="checkbox"/> | MAP3K7                    |           | kinase                  |                      | 0.736              | bias  | 1.46E-09           | ↑CCL5, ...all 11       | 105 (19)           |
| <input type="checkbox"/> | IGF1                      |           | growth factor           |                      | -0.011             | bias  | 2.03E-09           | ↑AKR1C1, ...all 19     | 121 (22)           |
| <input type="checkbox"/> | IRF8                      |           | transcription regula... |                      | 0.620              | bias  | 2.06E-09           | ↑B2M, ...all 11        | 103 (14)           |
| <input type="checkbox"/> | FADD                      |           | other                   | Activated            | 2.530              | bias  | 2.59E-09           | ↑CASP7, ...all 10      | 74 (10)            |
| <input type="checkbox"/> | RNA polymerase II         |           | complex                 |                      |                    |       | 2.72E-09           | ↑B2M, ...all 15        |                    |
| <input type="checkbox"/> | TERT                      |           | enzyme                  |                      |                    |       | 2.86E-09           | ↑AKAP2, ...all 12      | 50 (8)             |
| <input type="checkbox"/> | resiquimoc                |           | chemical drug           | Activated            | 2.748              | bias  | 3.19E-09           | ↑CASP4, ...all 13      | 90 (19)            |
| <input type="checkbox"/> | IL4                       |           | cytokine                |                      | 1.930              | bias  | 3.79E-09           | ↑ANXA2, ...all 26      | 78 (17)            |
| <input type="checkbox"/> | TAB1                      |           | enzyme                  | Inhibited            | -2.621             | bias  | 4.69E-09           | ↑CCL5, ↑CFB, ...all 7  | 91 (23)            |
| <input type="checkbox"/> | PLAU                      | ↑1.000    | peptidase               |                      | 1.526              | bias  | 5.85E-09           | ↑CCL5, ...all 9        | 96 (19)            |
| <input type="checkbox"/> | EBI3                      |           | cytokine                | Activated            | 2.778              | bias  | 6.19E-09           | ↑B2M, ↑H...all 8       | 94 (14)            |
