# Supplementary material
Source: PubMed Central journal article supplement (PMC4256481)

# Supplemental Fig. 1

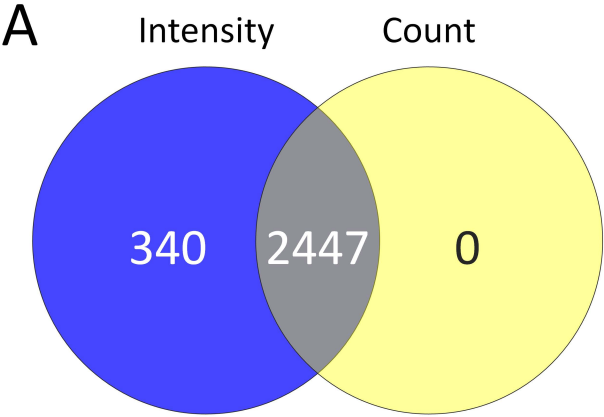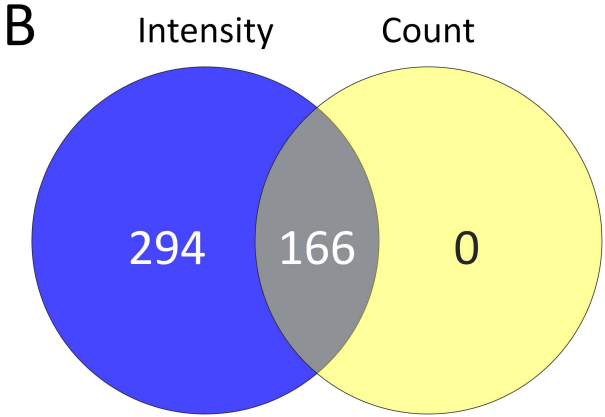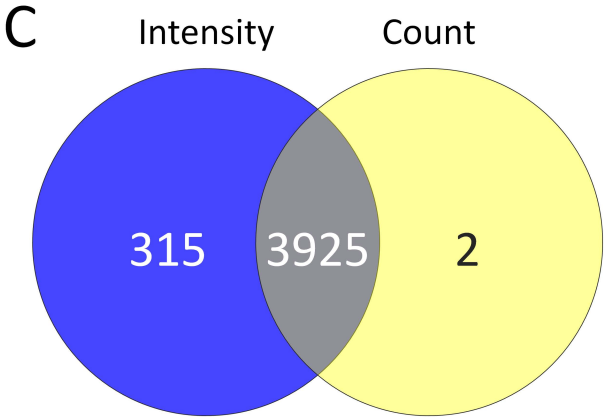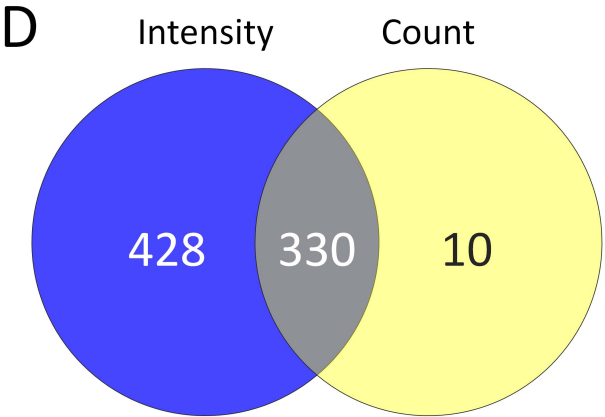

Supplement: supp_M114.041129_mcp.M114.041129-1.pdf [file supp_M114.041129_mcp.M114.041129-1.pdf]

supplemental Fig. 3

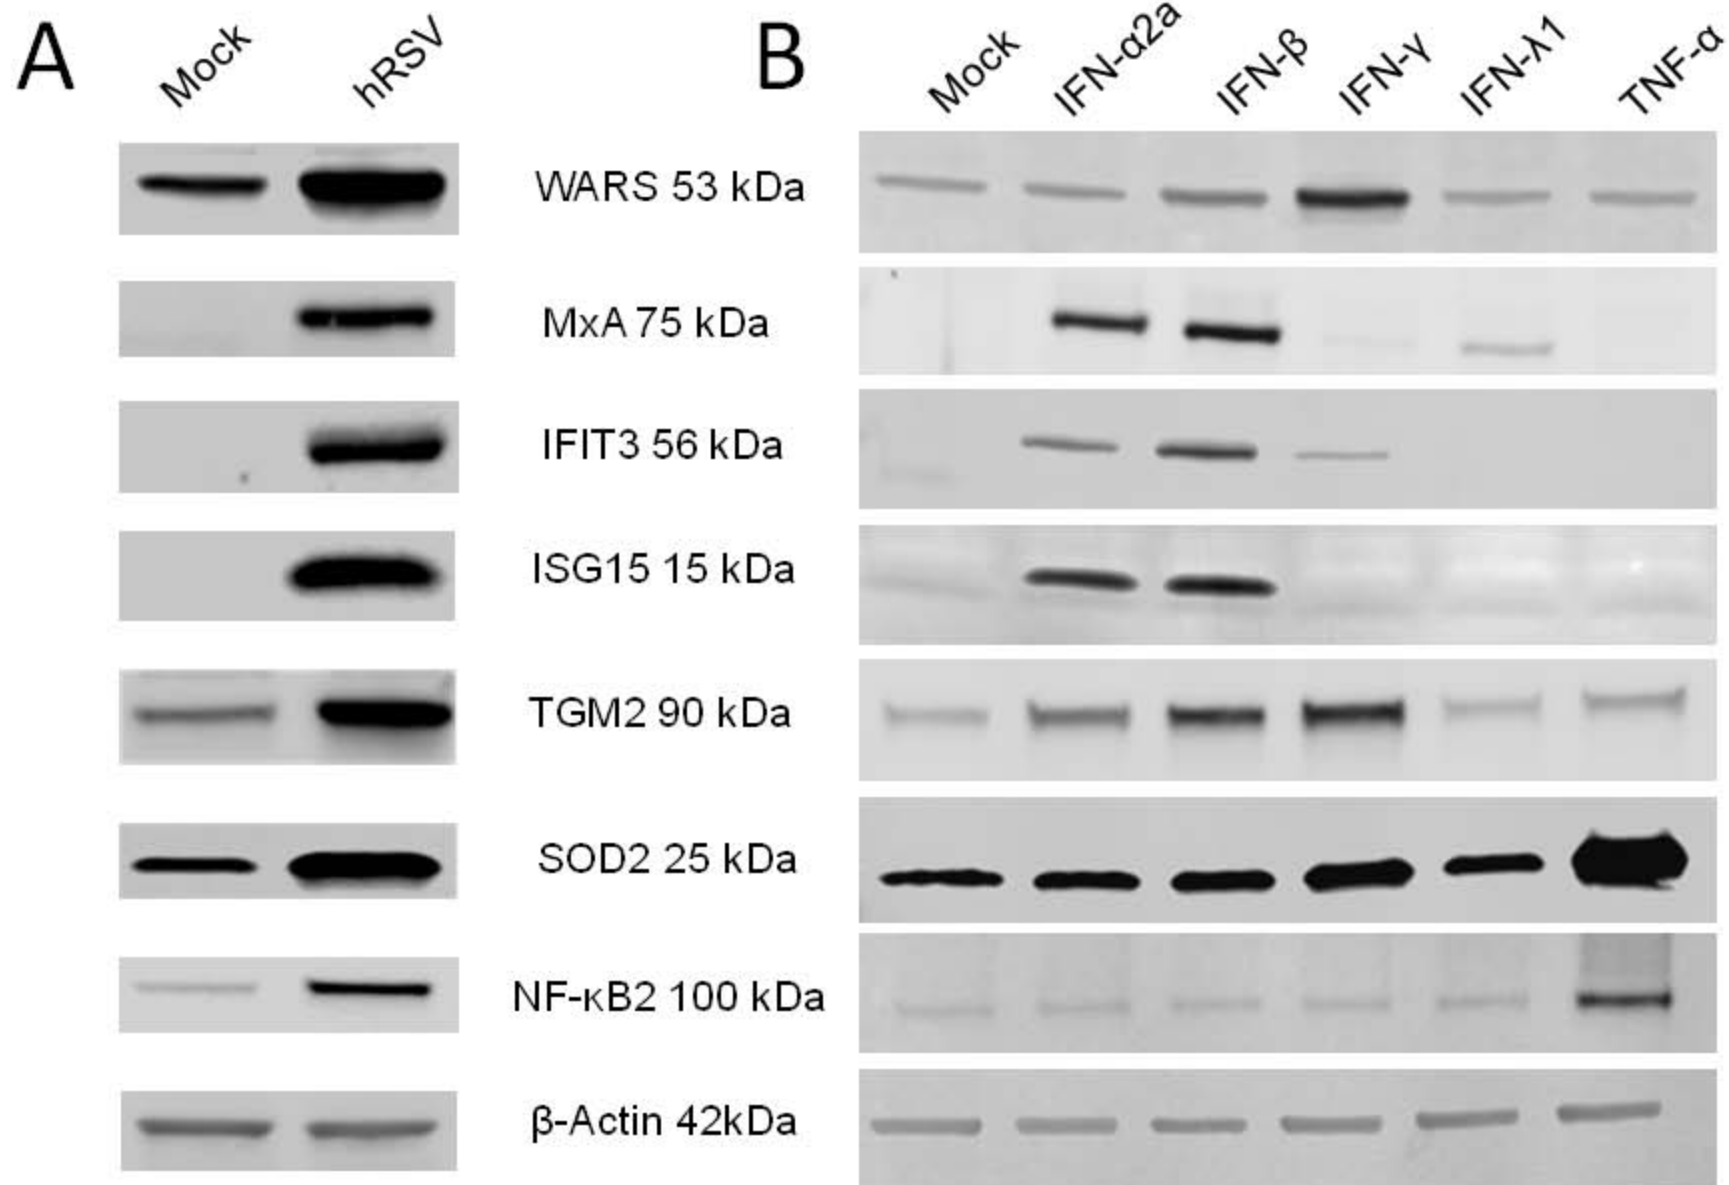

Supplement: supp_M114.041129_mcp.M114.041129-11.pdf [file supp_M114.041129_mcp.M114.041129-11.pdf]

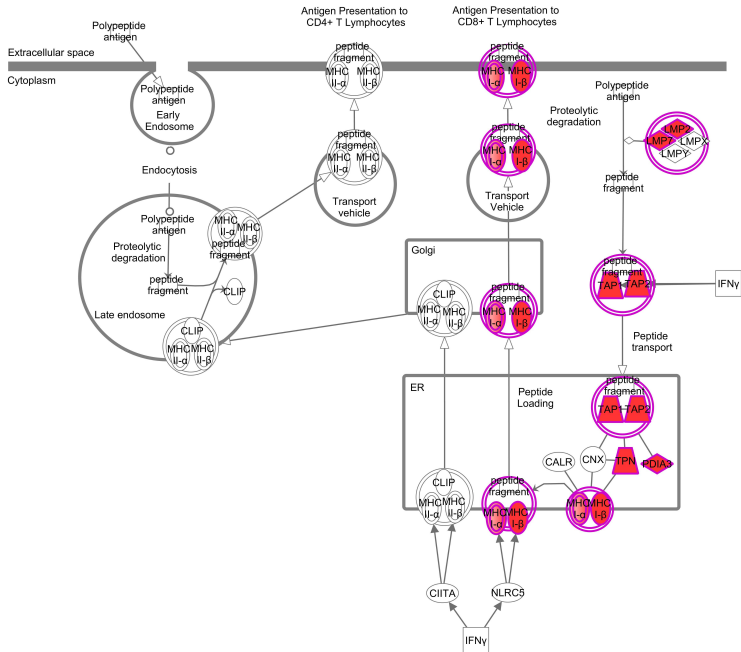

Supplement: supp_M114.041129_mcp.M114.041129-6.pdf [file supp_M114.041129_mcp.M114.041129-6.pdf]

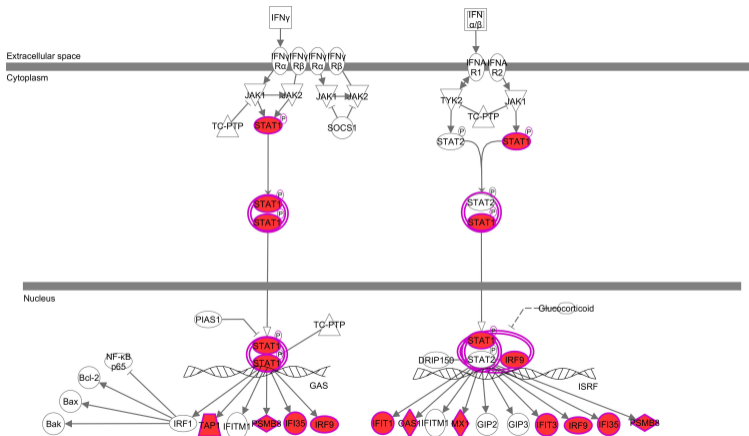

Supplement: supp_M114.041129_mcp.M114.041129-7.pdf [file supp_M114.041129_mcp.M114.041129-7.pdf]

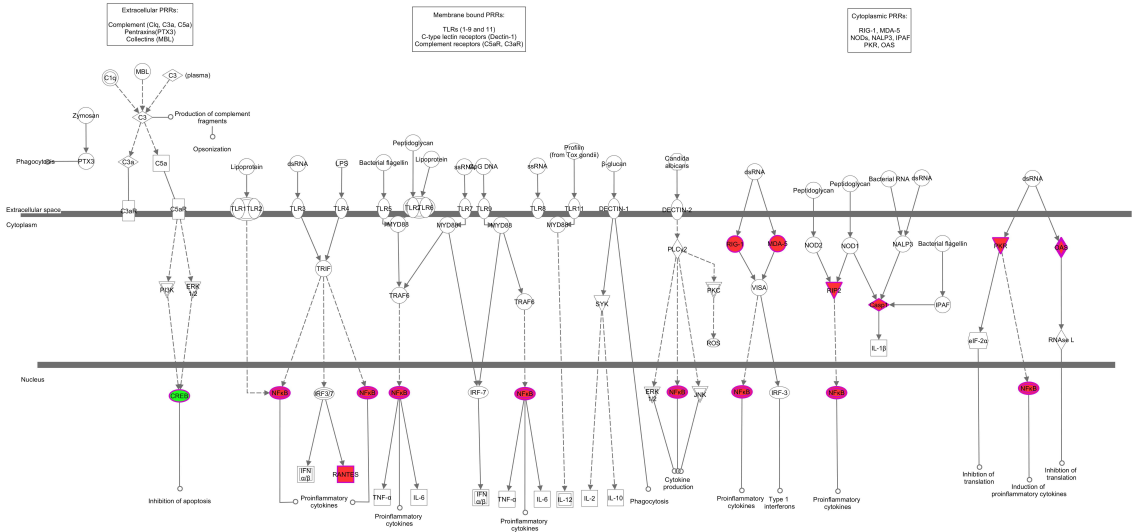

Supplement: supp_M114.041129_mcp.M114.041129-8.pdf [file supp_M114.041129_mcp.M114.041129-8.pdf]
